# Supplementary material
Source: PubMed Central journal article supplement (PMC6237431)
Supplement: NIHMS1502867-supplement-2.pdf [file NIHMS1502867-supplement-2.pdf]

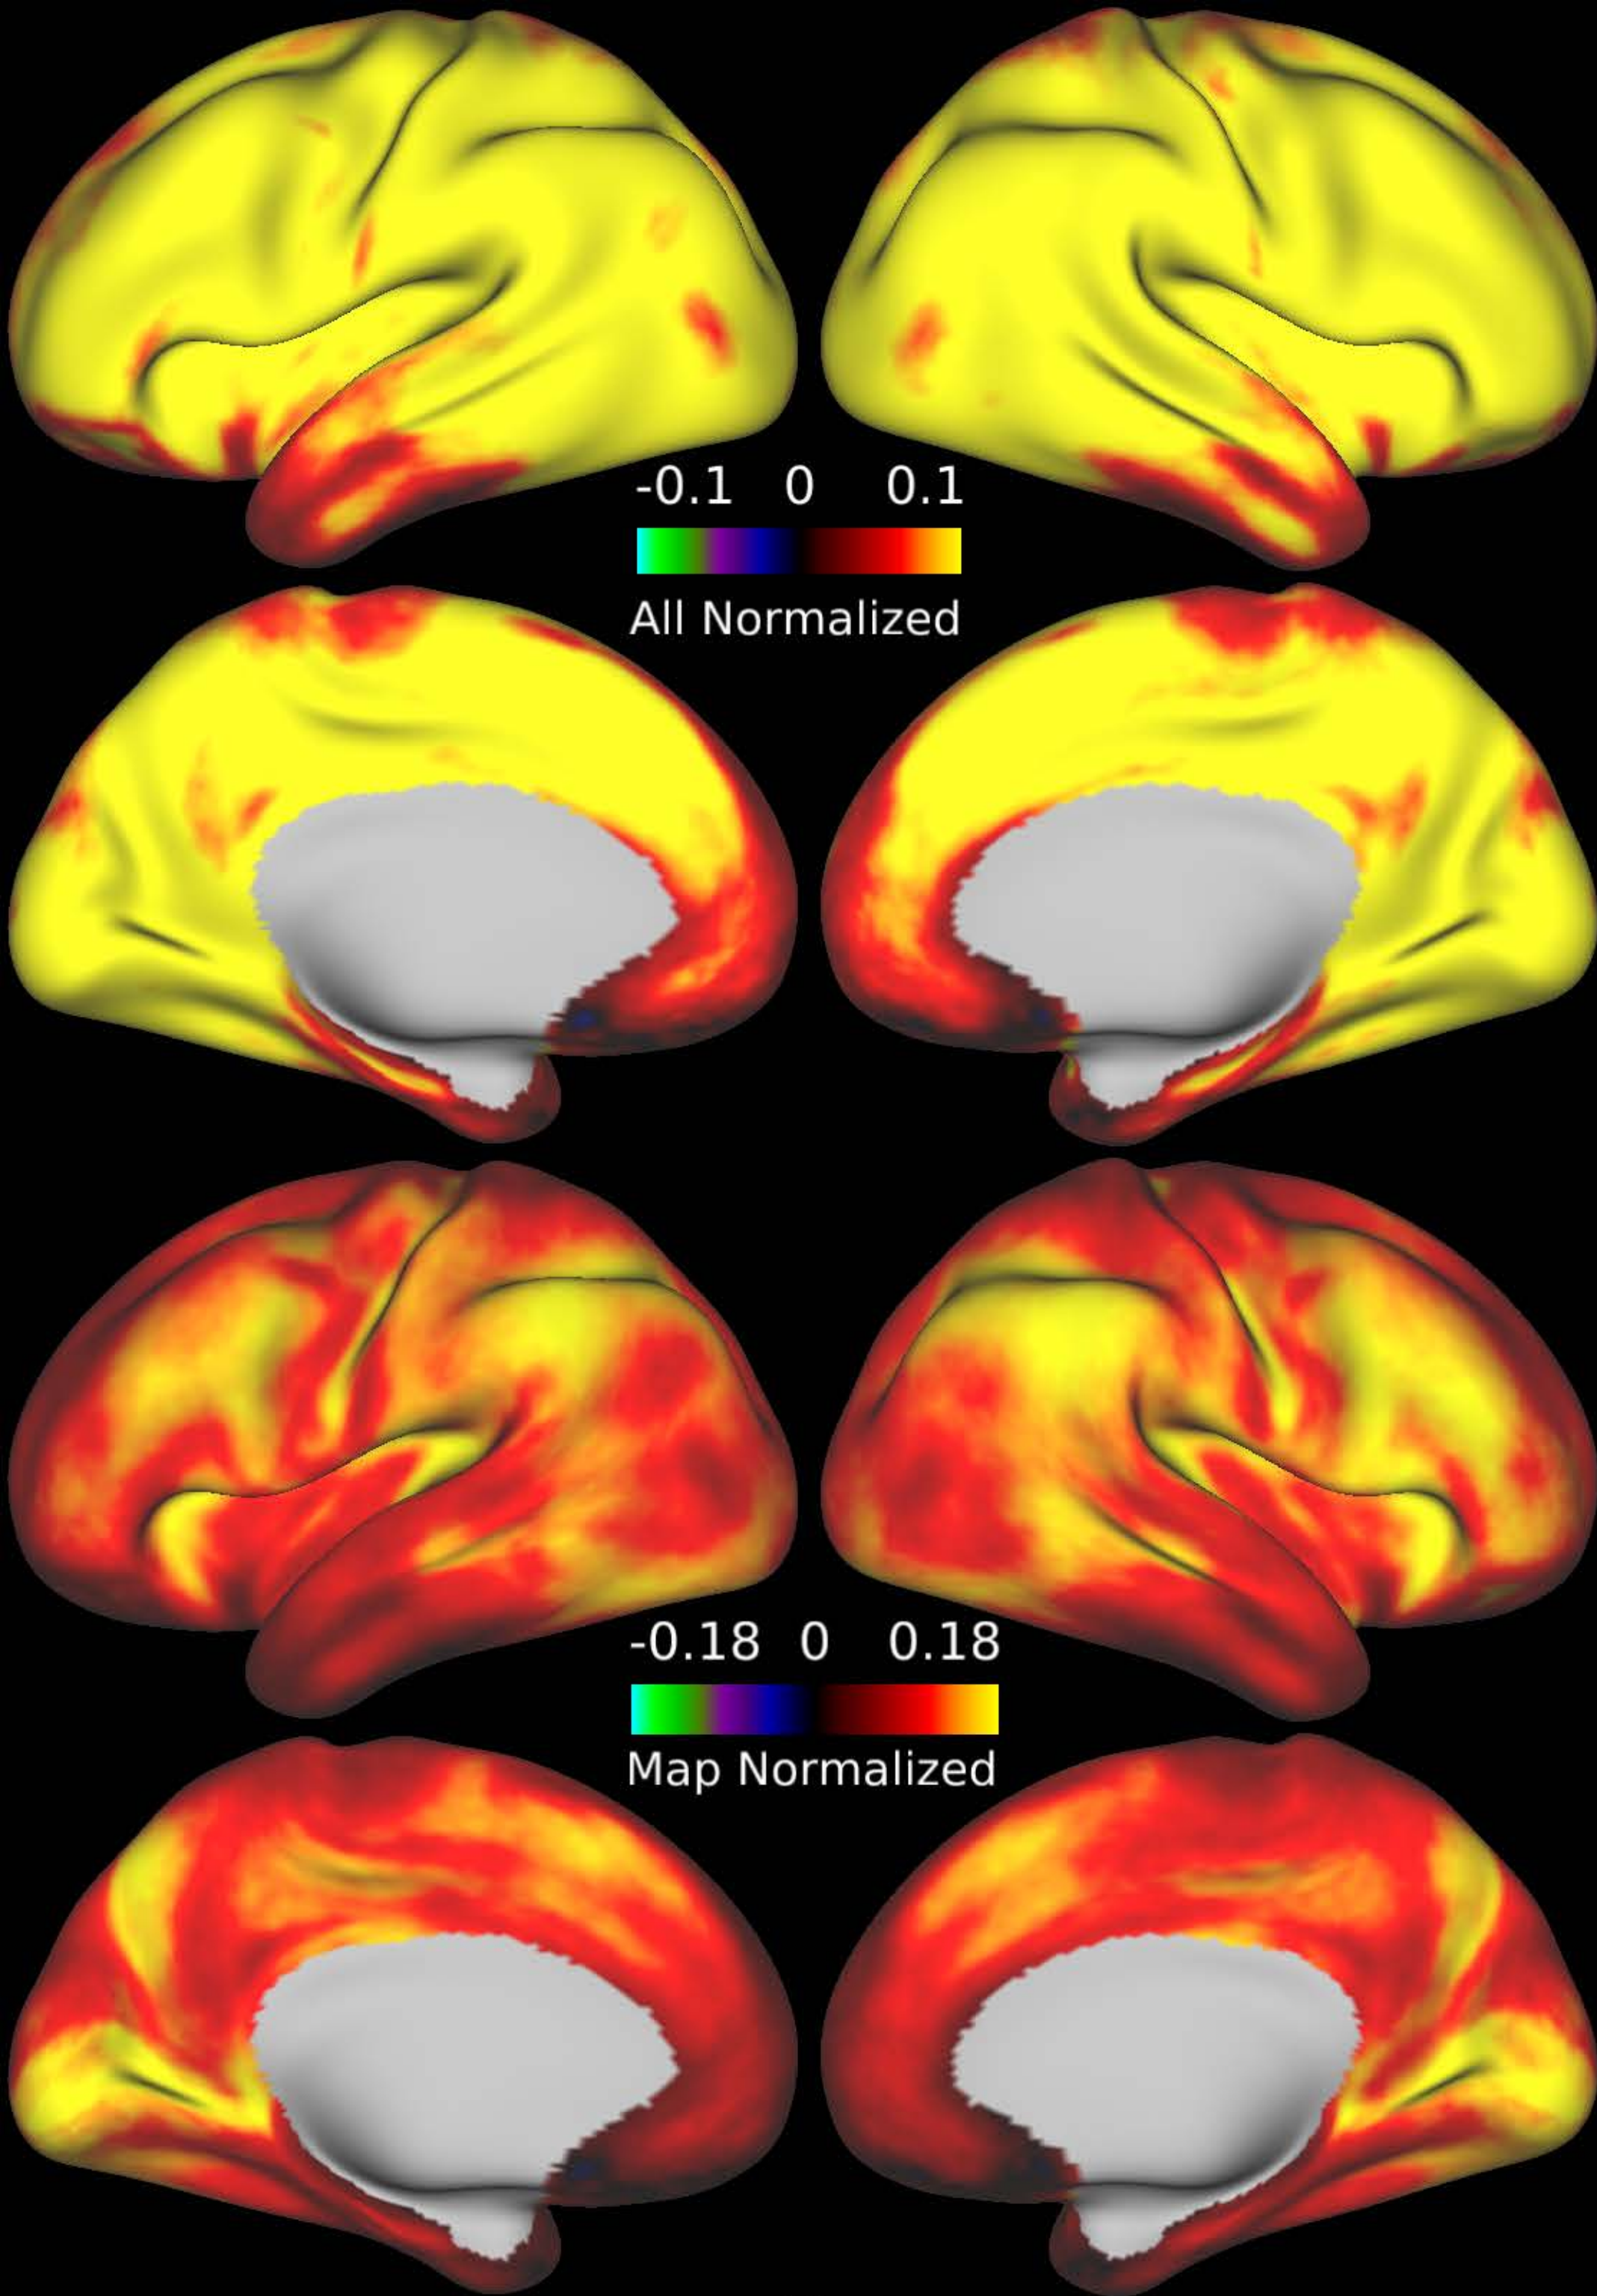

Hertz

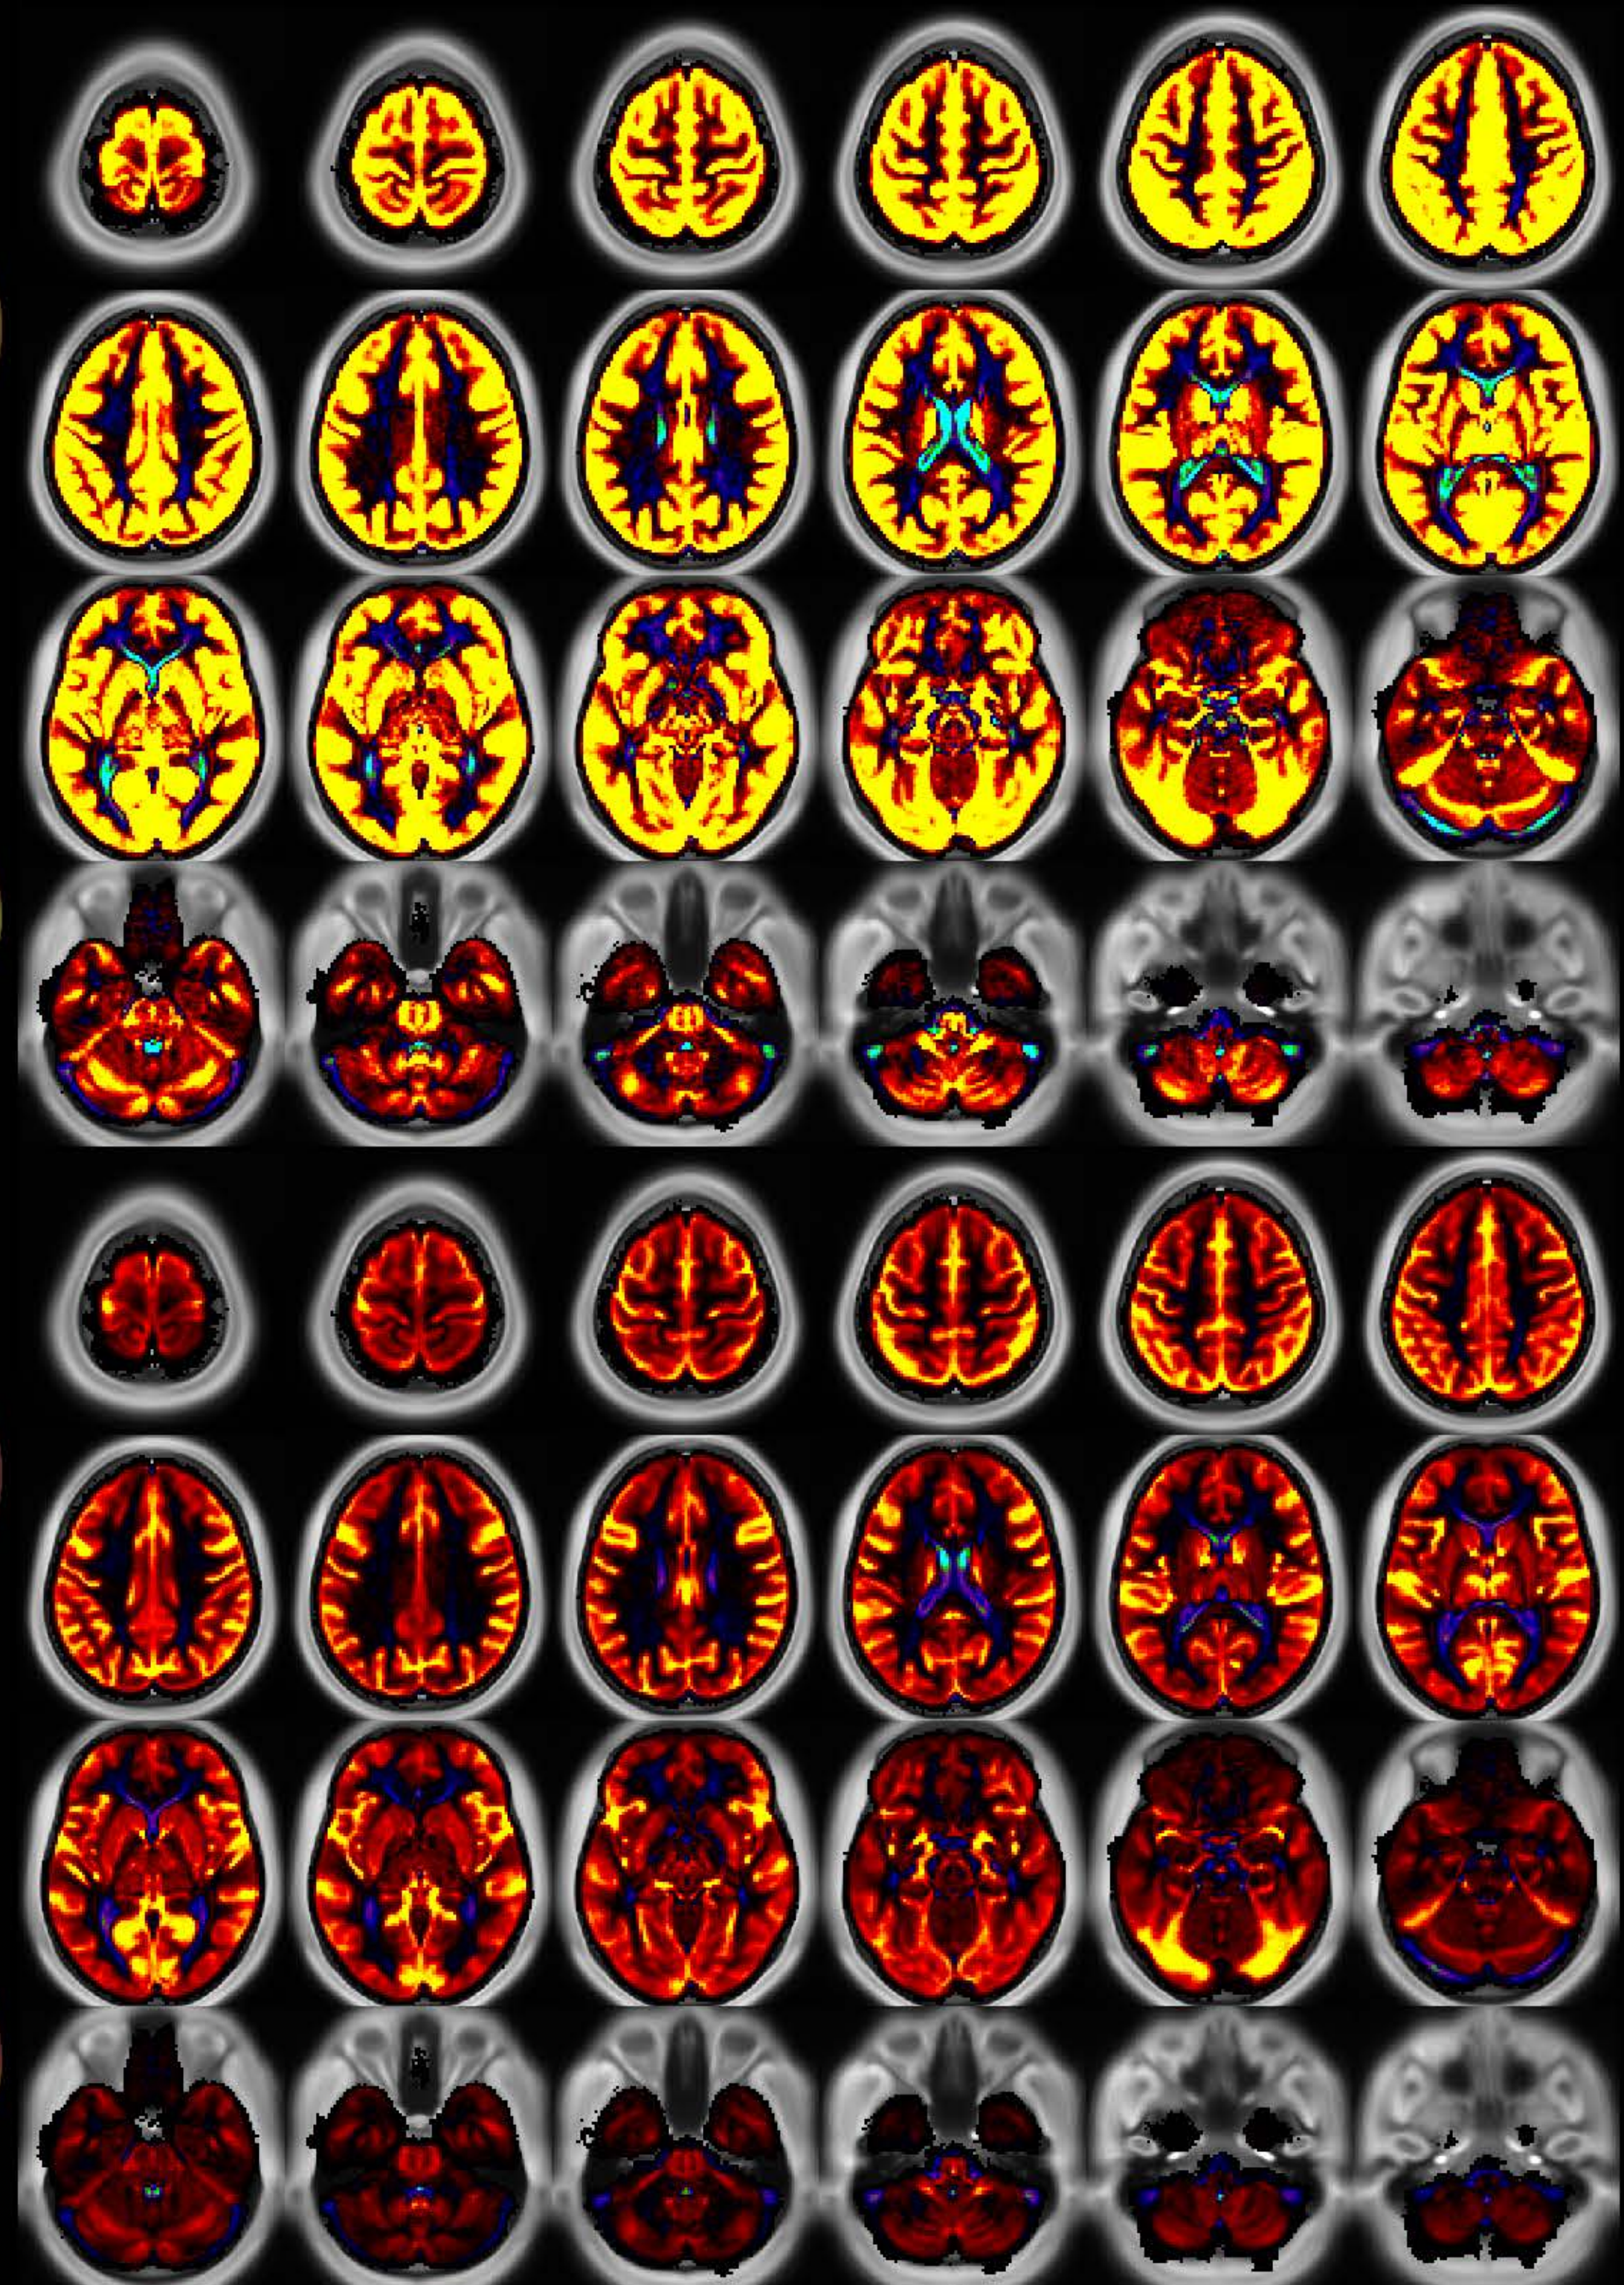

Seconds

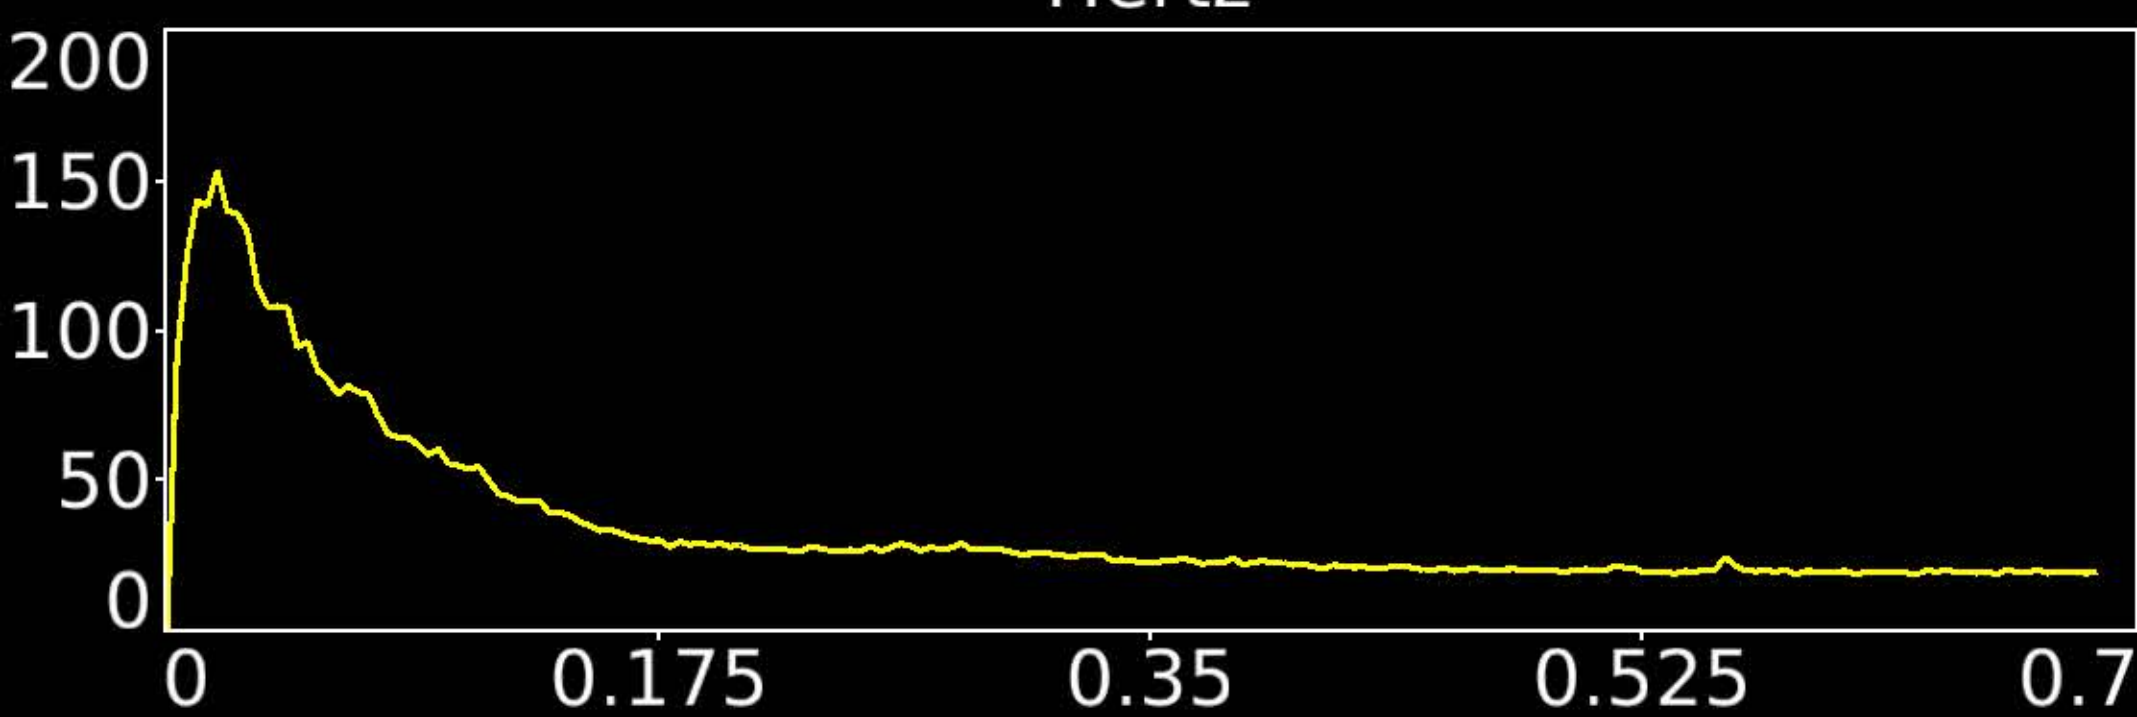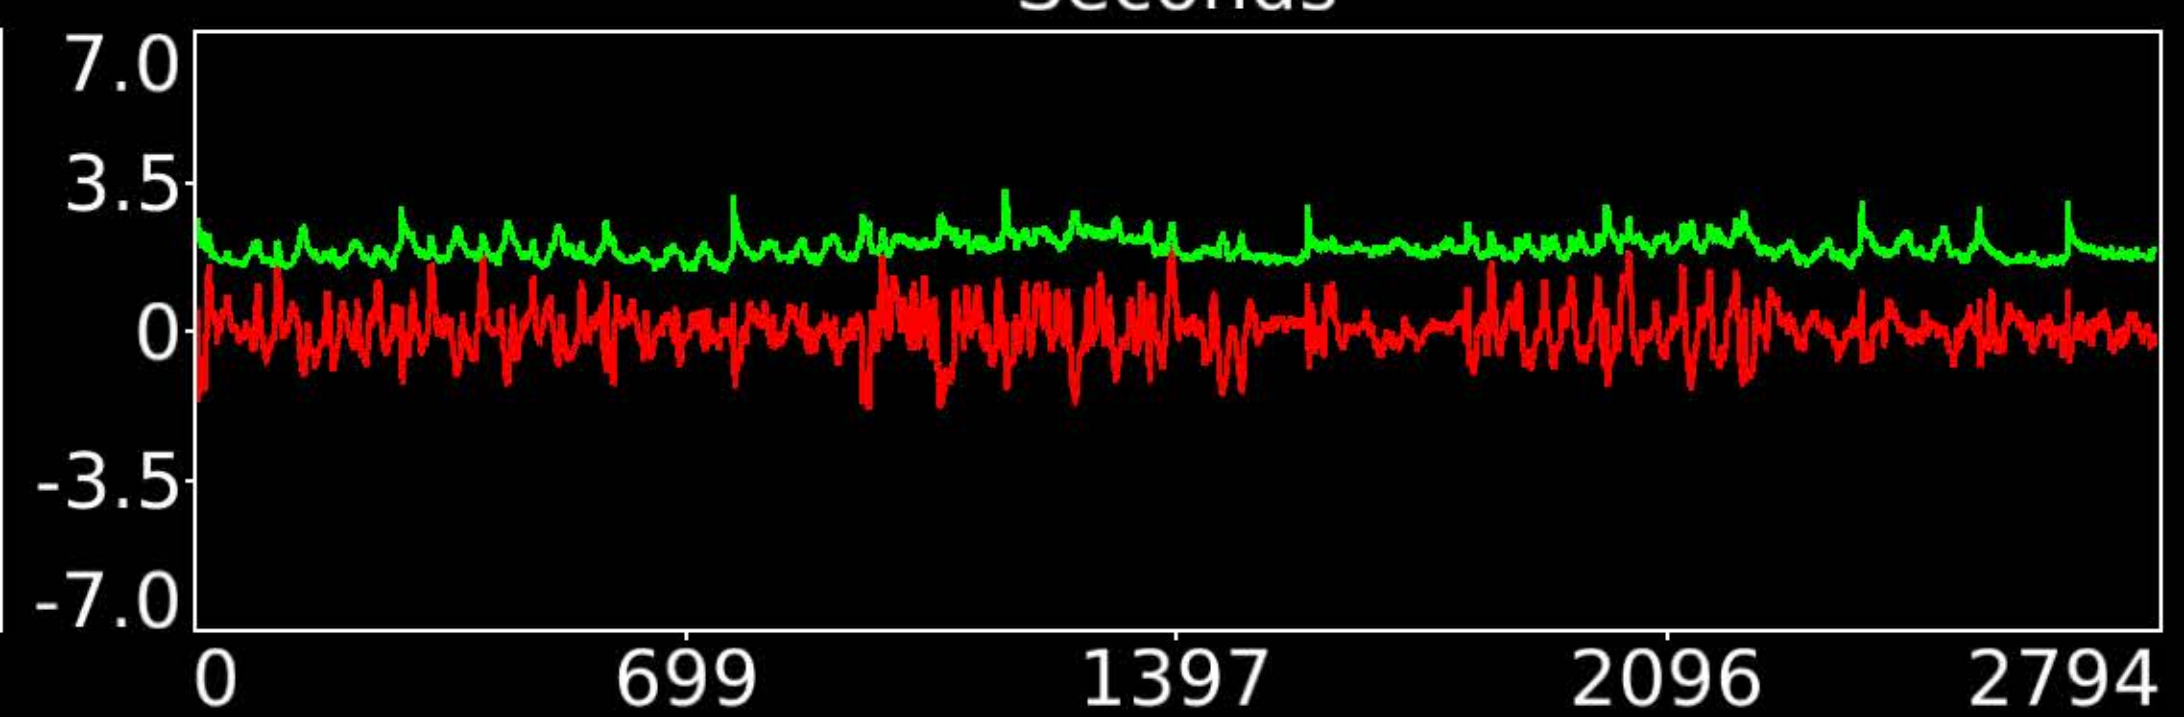

|                         |                                  |                             |
|-------------------------|----------------------------------|-----------------------------|
| Number & Class: 1 Noise | Name: Global Physiological Noise |                             |
| RVT Correlated: Yes     | DVARS Dip Associated: Yes        | Cross-Subject Variable: Yes |
| Single Subject: No      | % Variance Explained: 6.67       | Globality Index: 5.82       |
| Rest Component: 3+6+8   | Taskr Component: 1               | Task Modulated: No          |

Rationale: Globally positive component matching hypothesized pattern for physiological artifact; does not clearly follow known areal boundaries



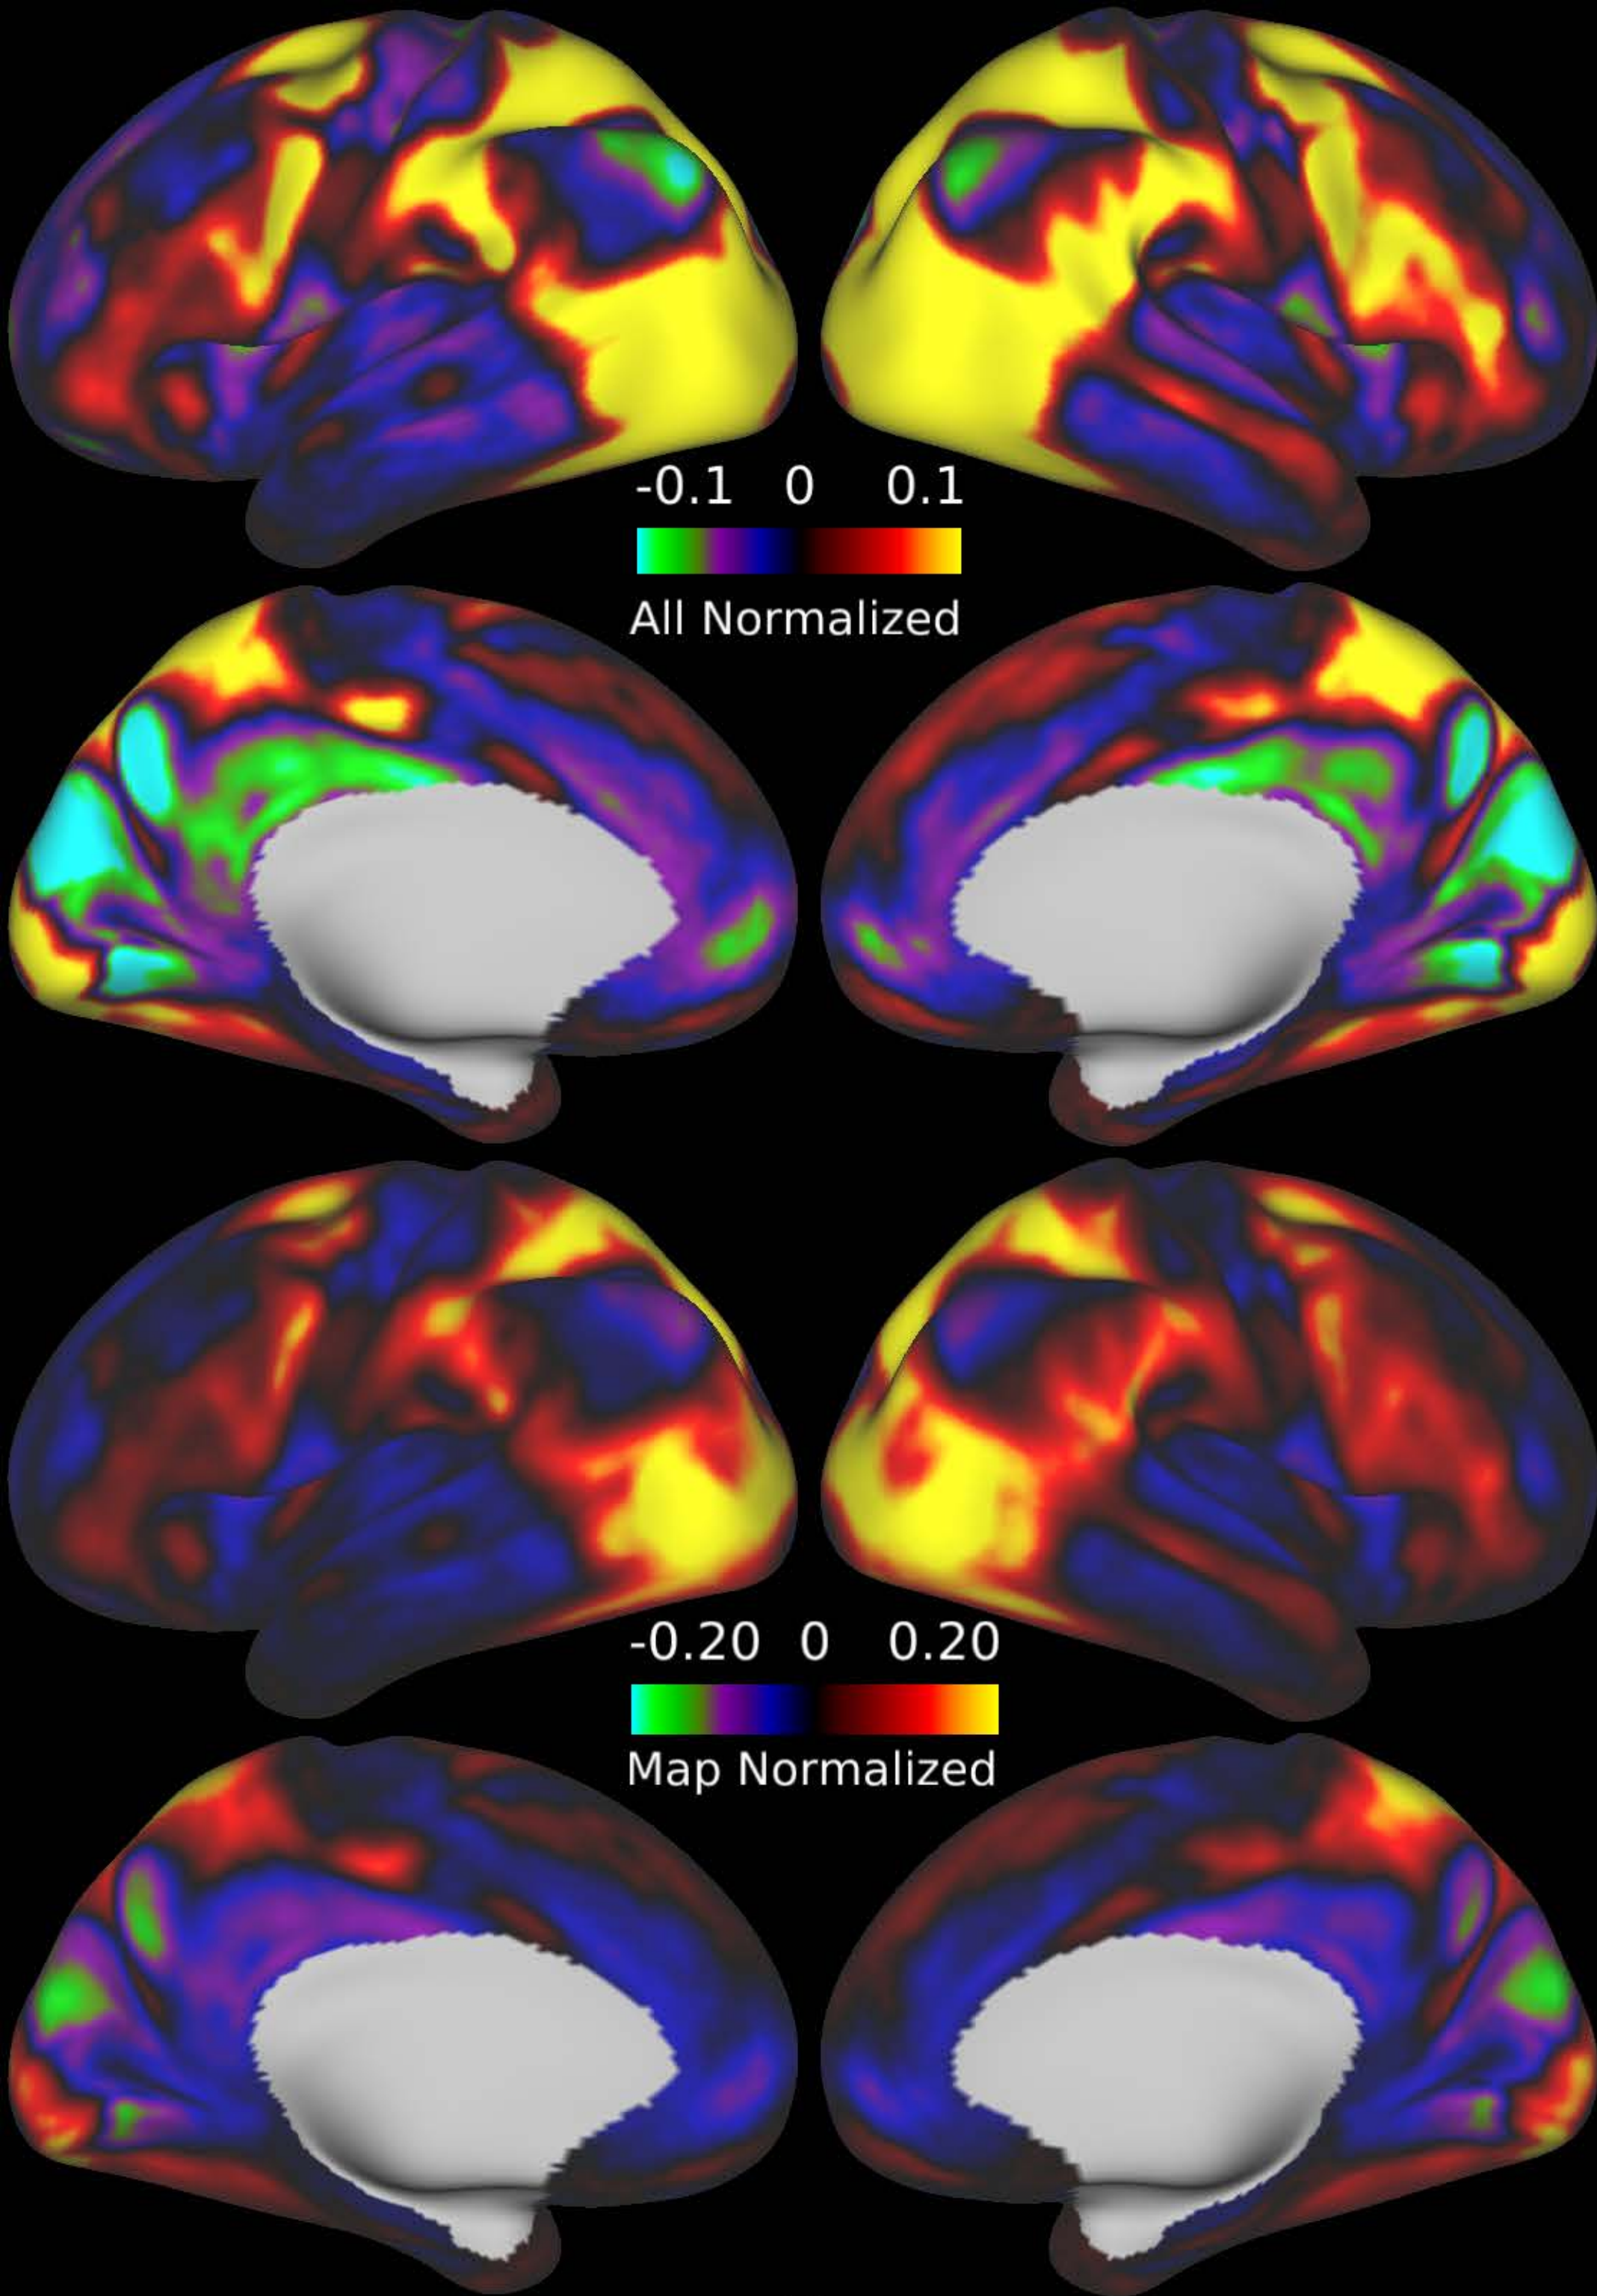

Hertz

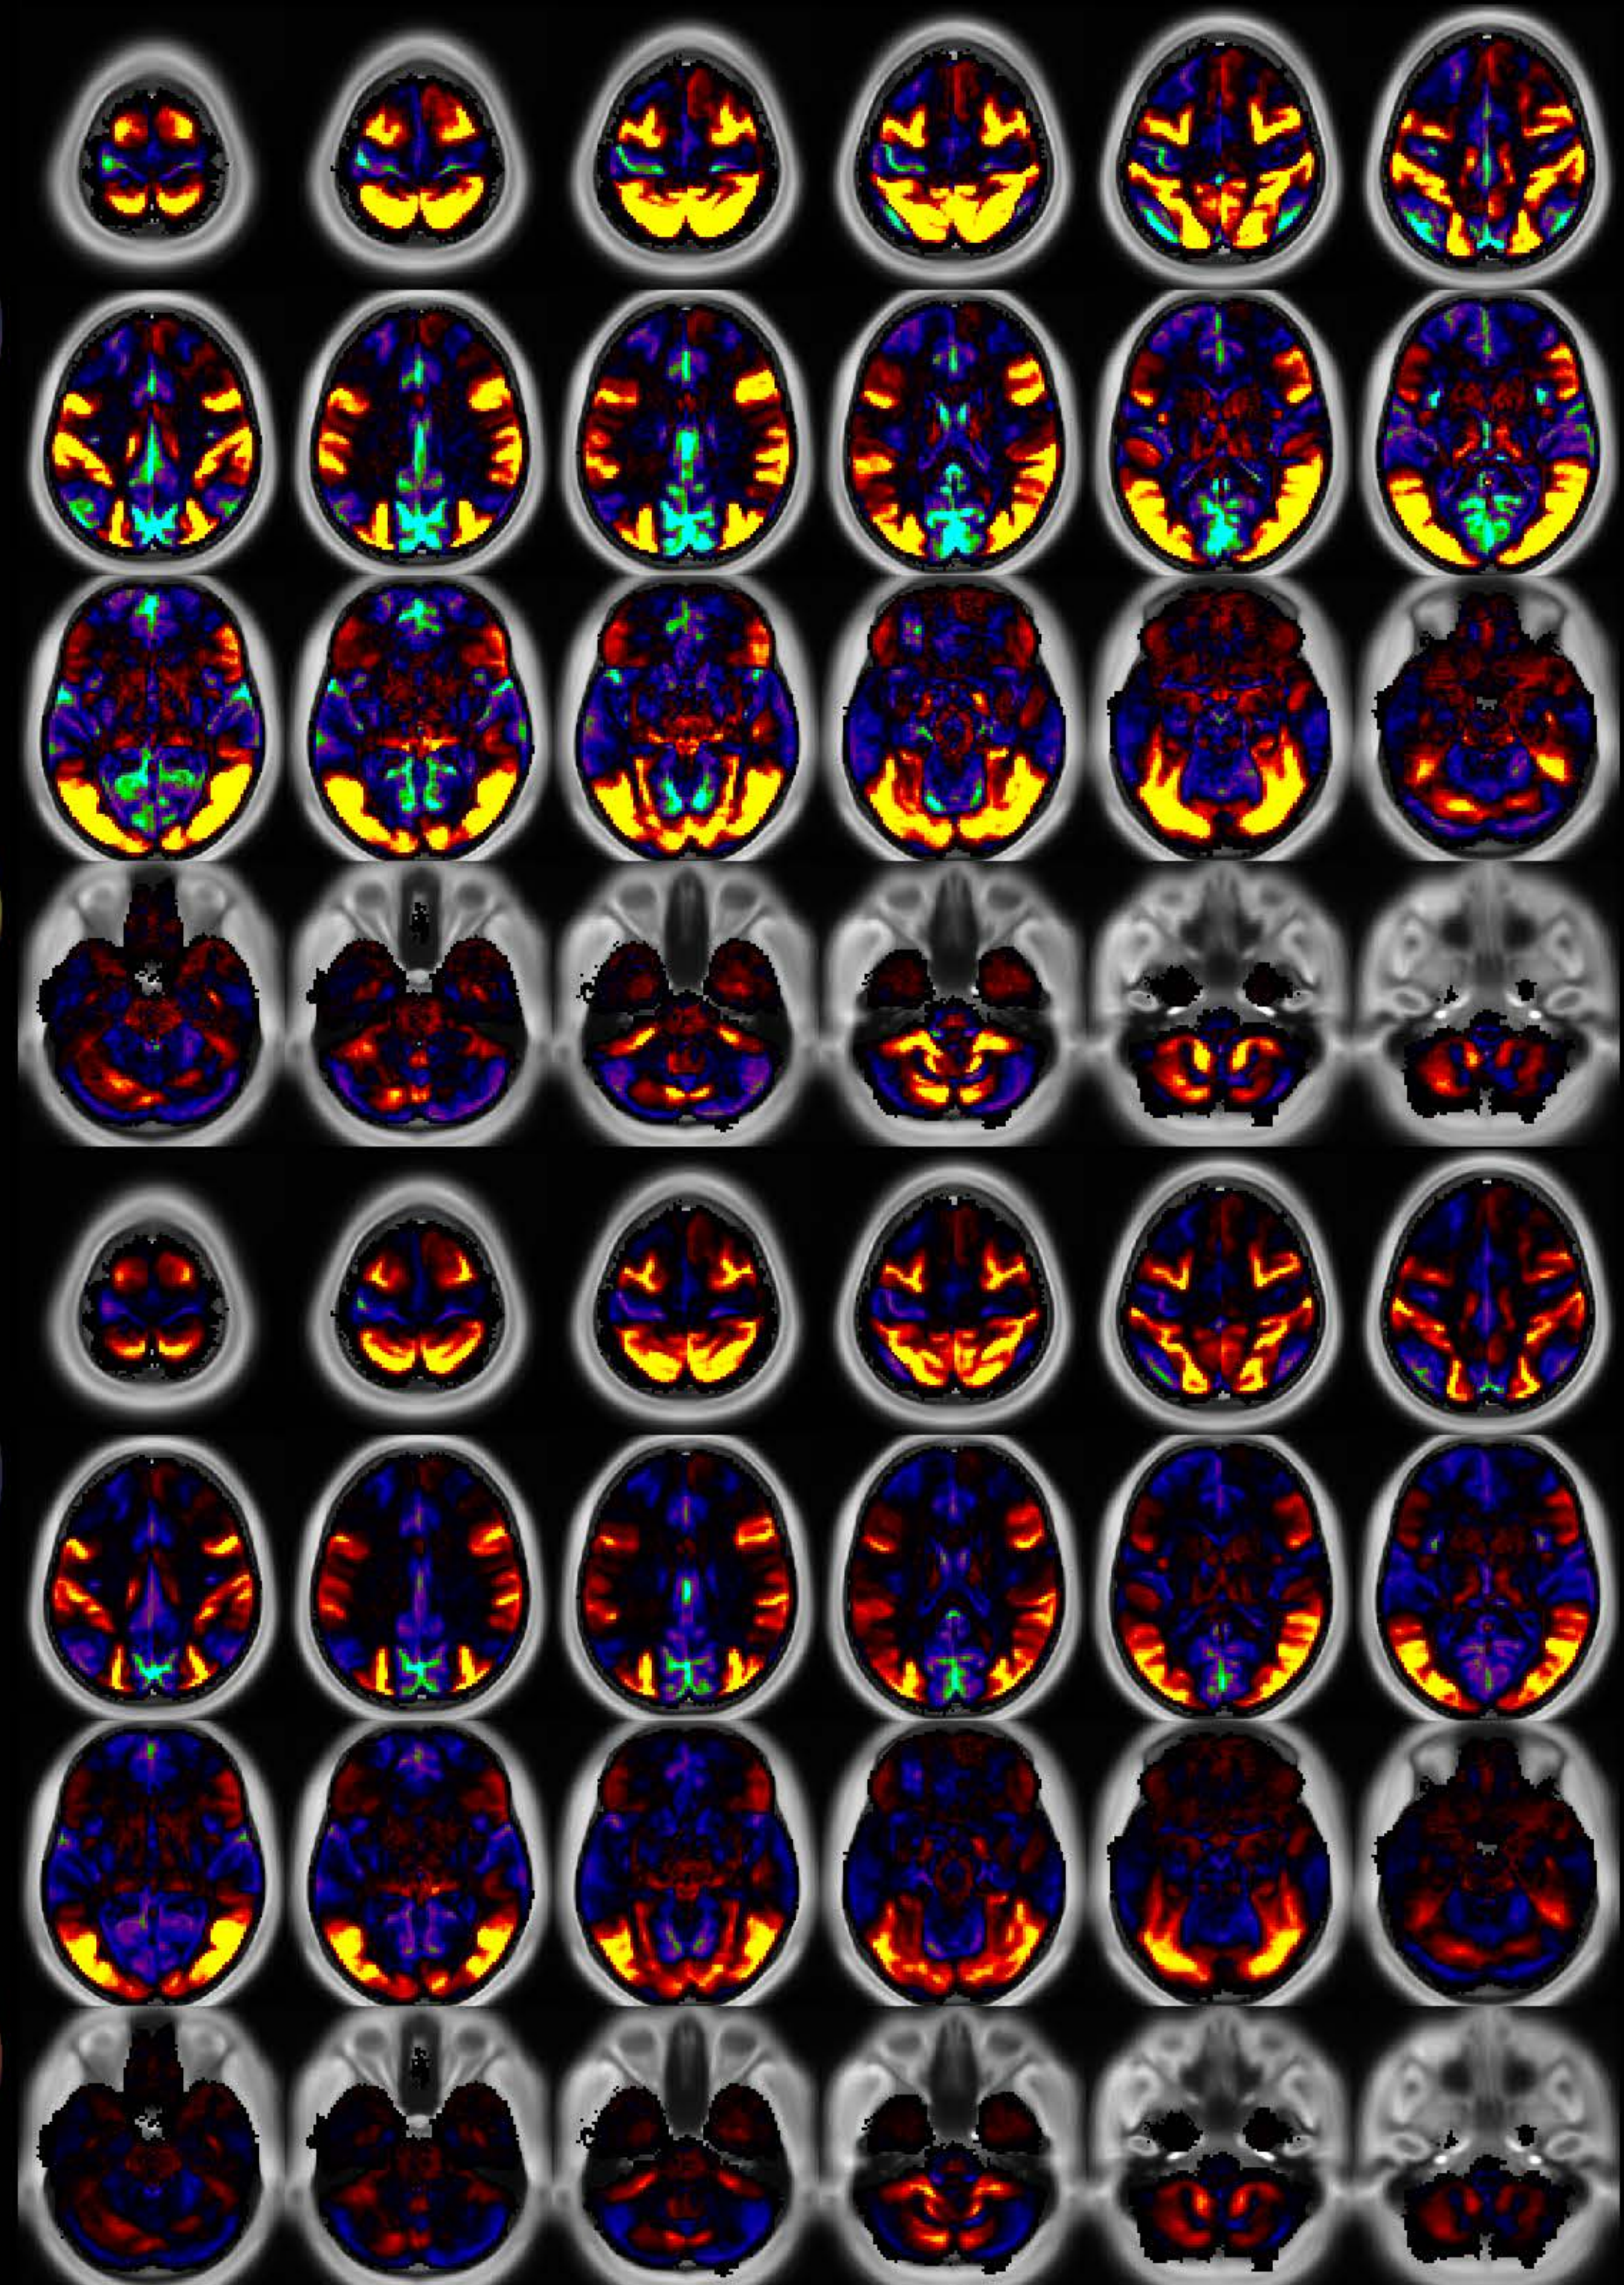

Seconds

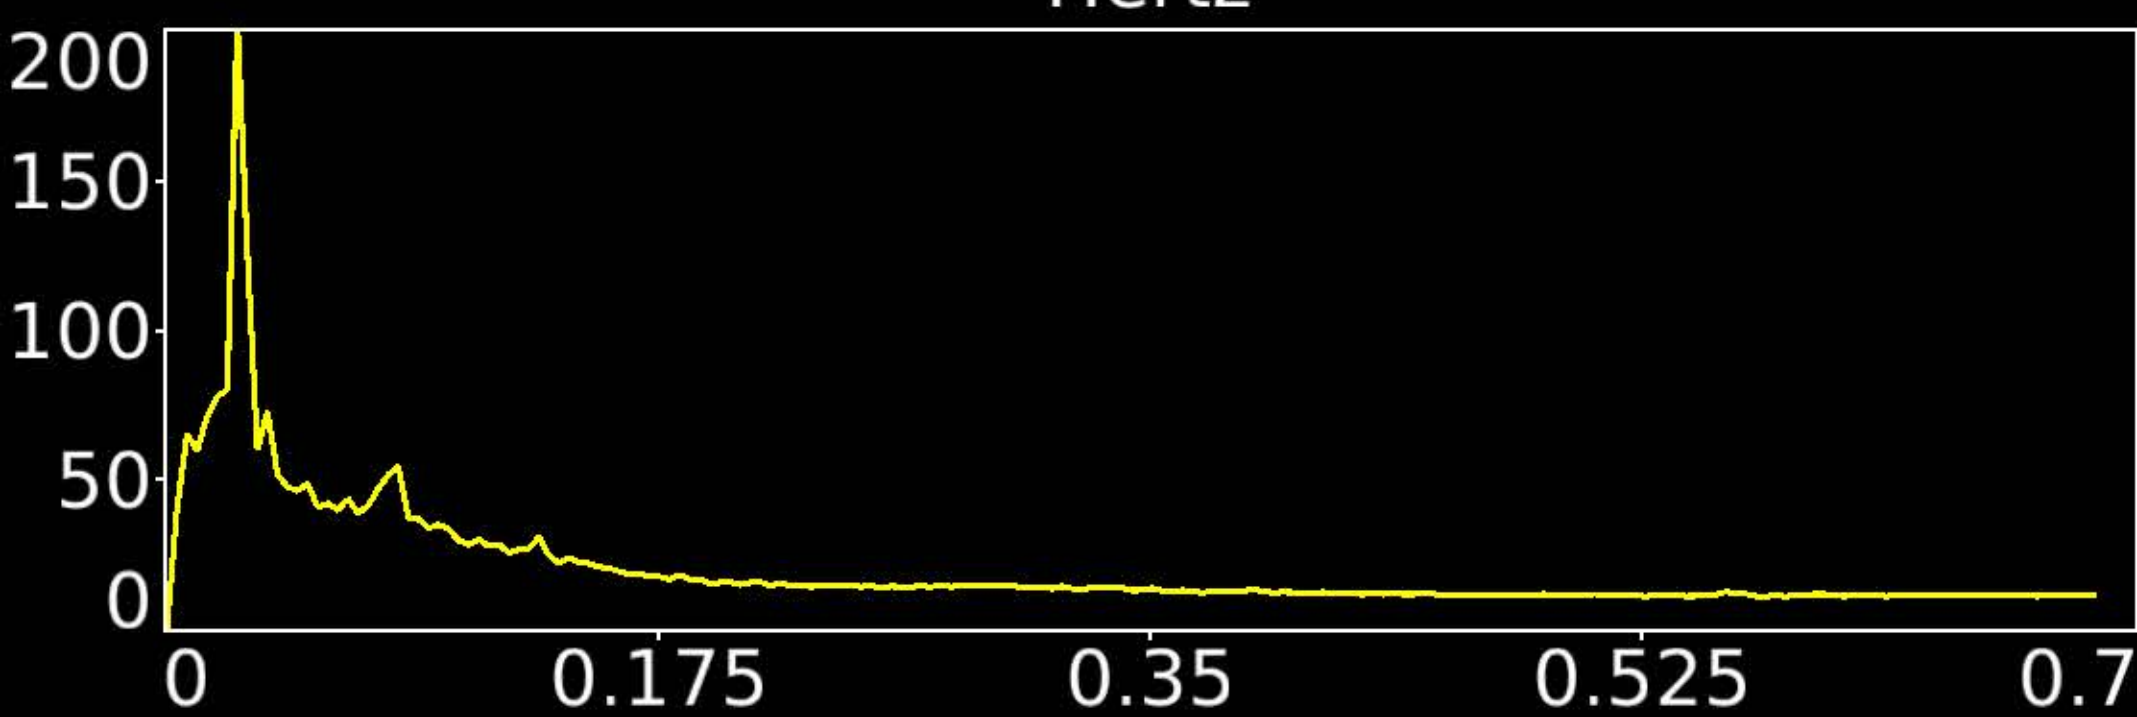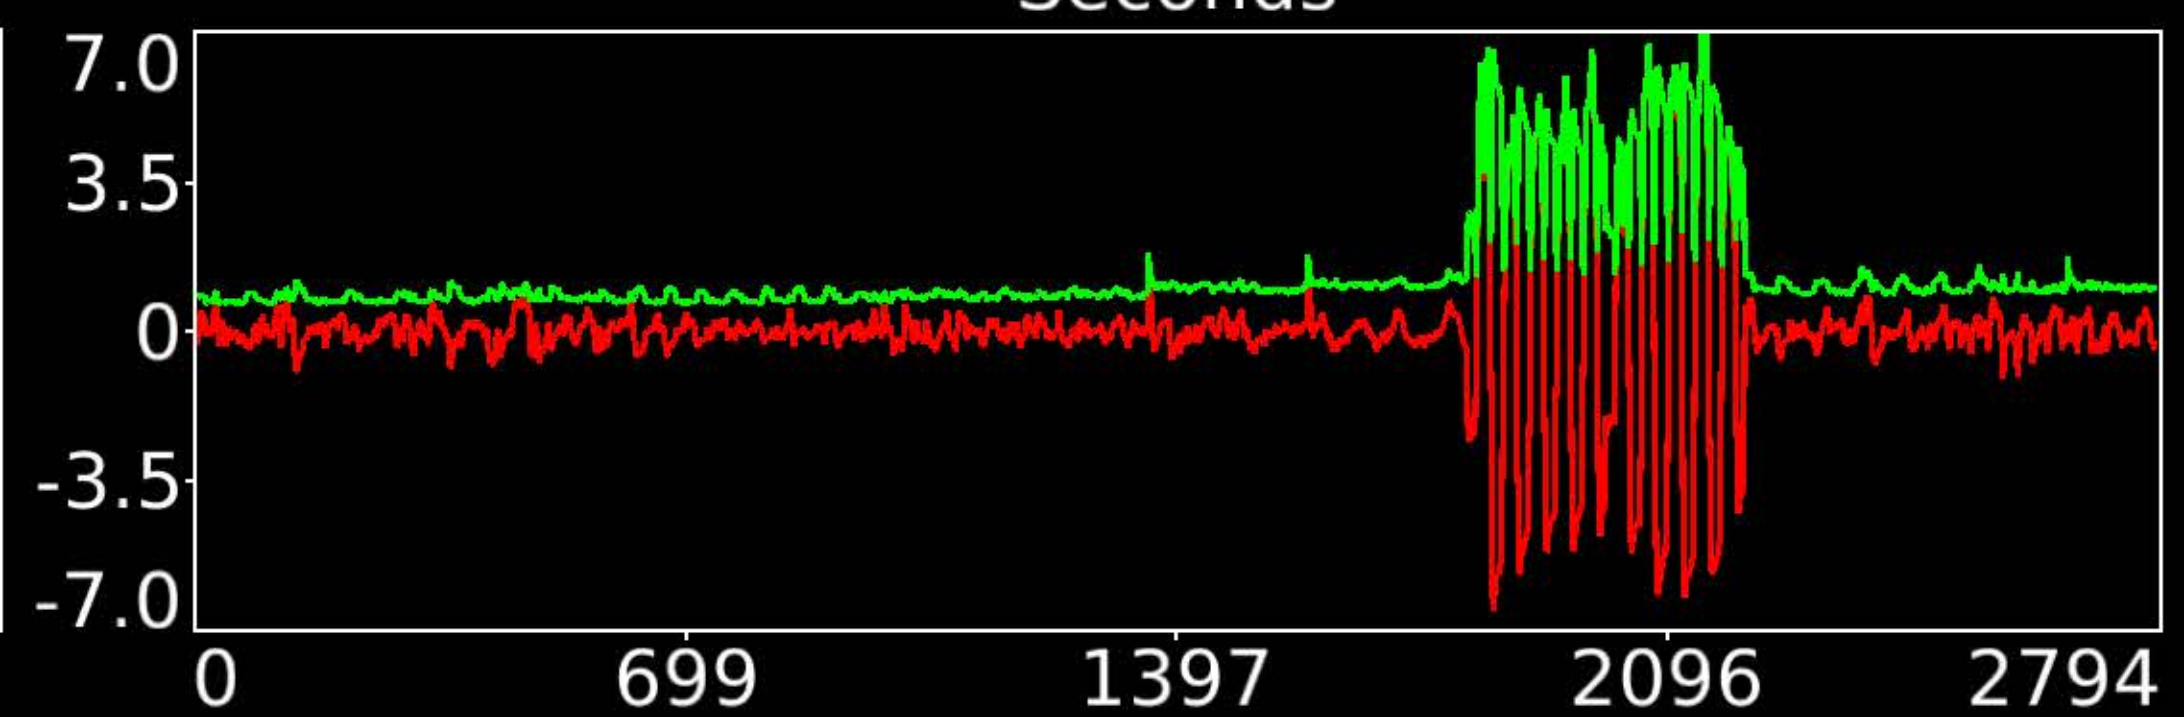

|                          |                            |                            |  |
|--------------------------|----------------------------|----------------------------|--|
| Number & Class: 2 Signal |                            | Name: Social Task Main     |  |
| RVT Correlated: No       | DVARS Dip Associated: No   | Cross-Subject Variable: No |  |
| Single Subject: No       | % Variance Explained: 4.78 | Globality Index: 0.25      |  |
| Rest Component: No       | Taskr Component: 11        | Task Modulated: Social     |  |

Rationale: Spatial map includes positive and negative patches that are correlated with a specific task design



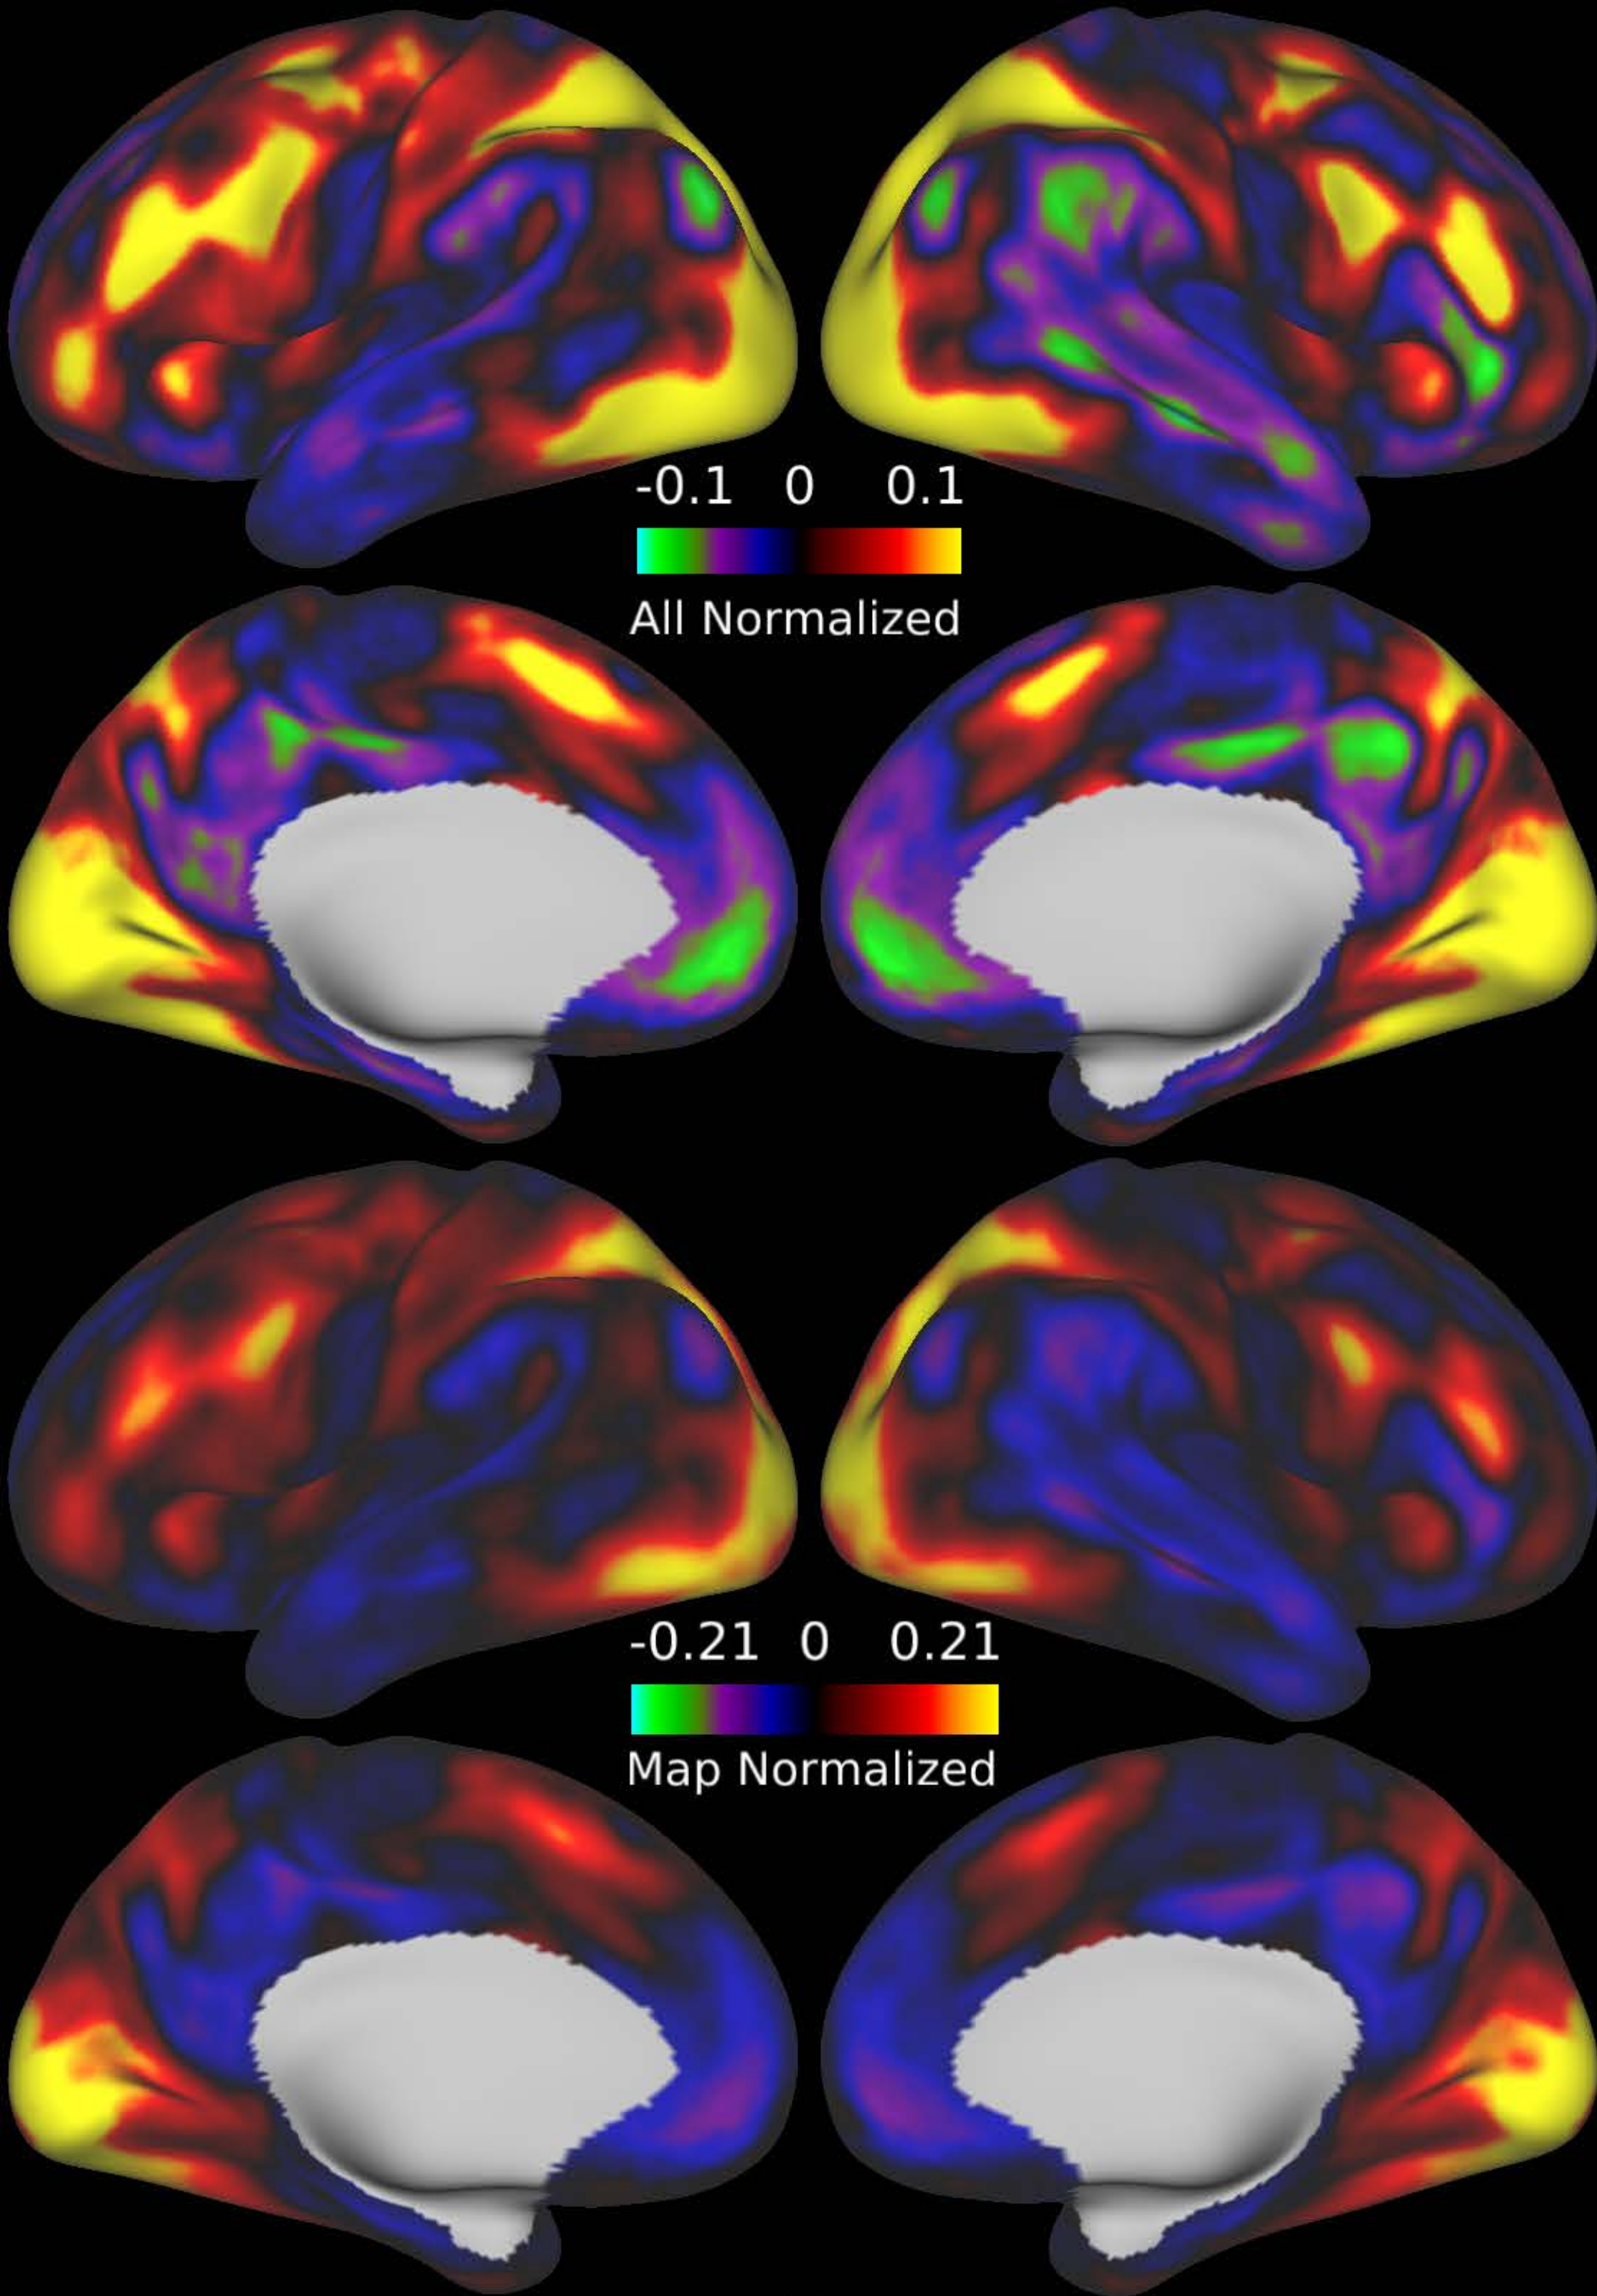

Hertz

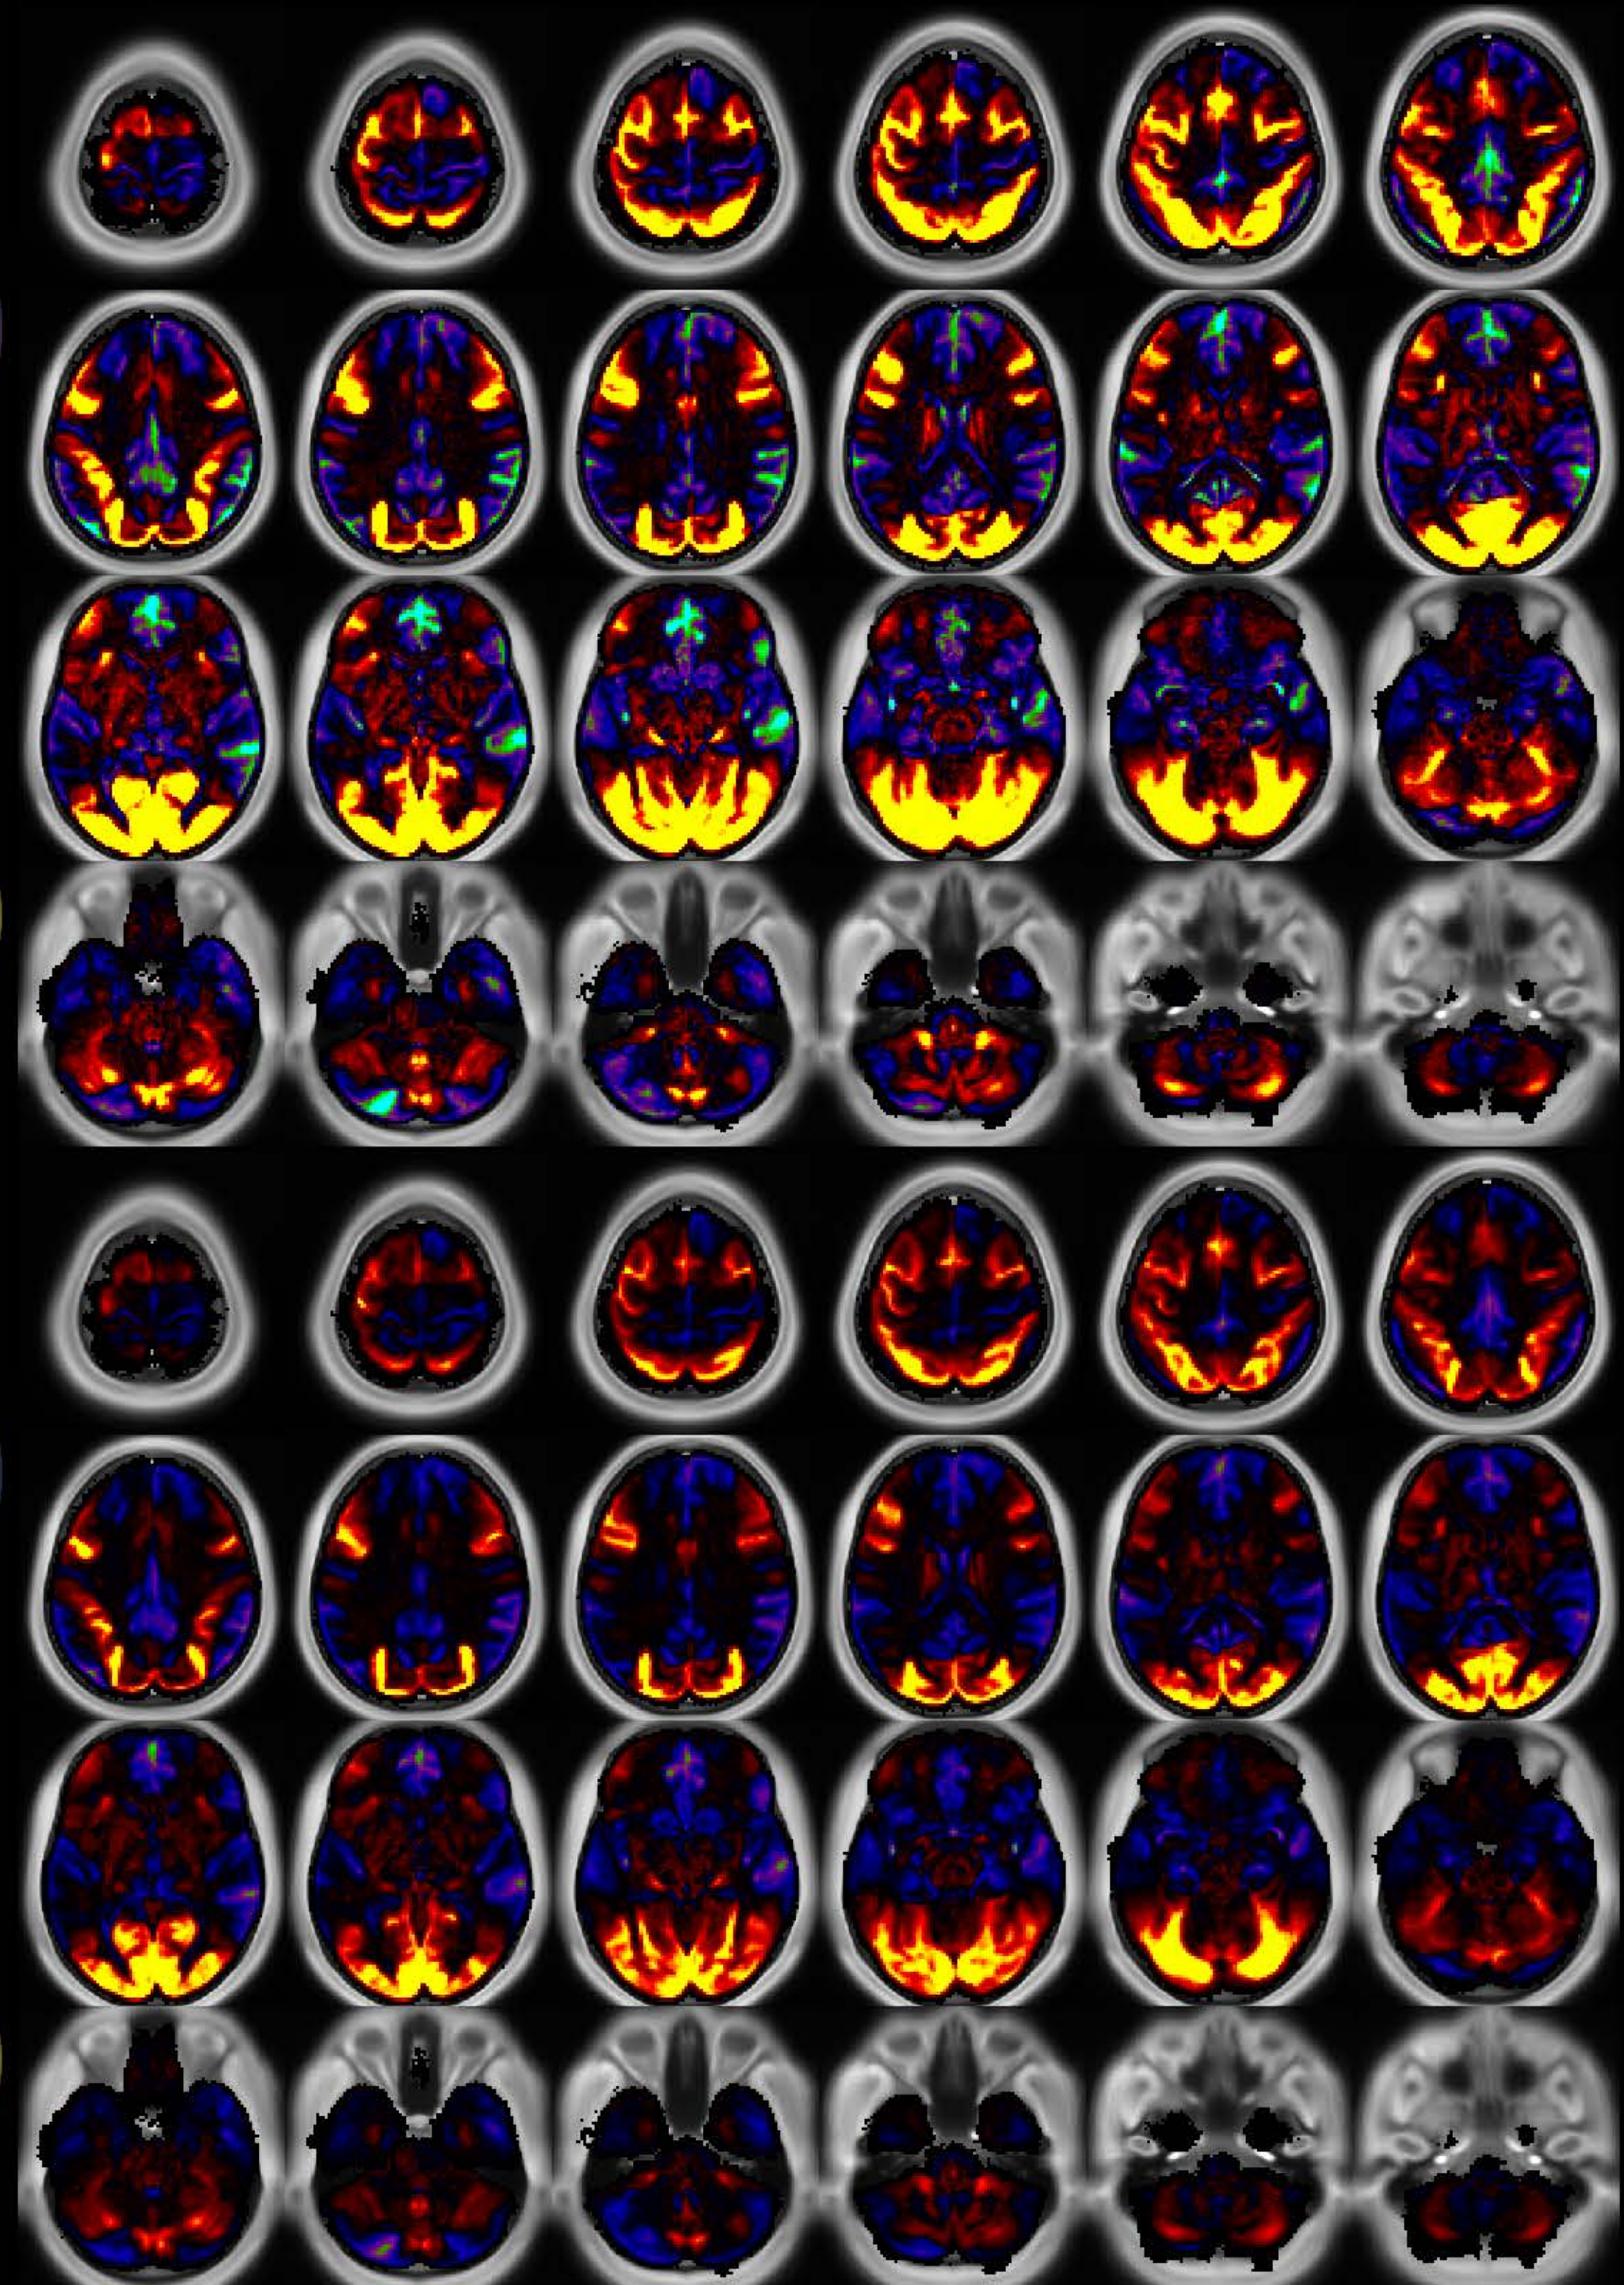

Seconds

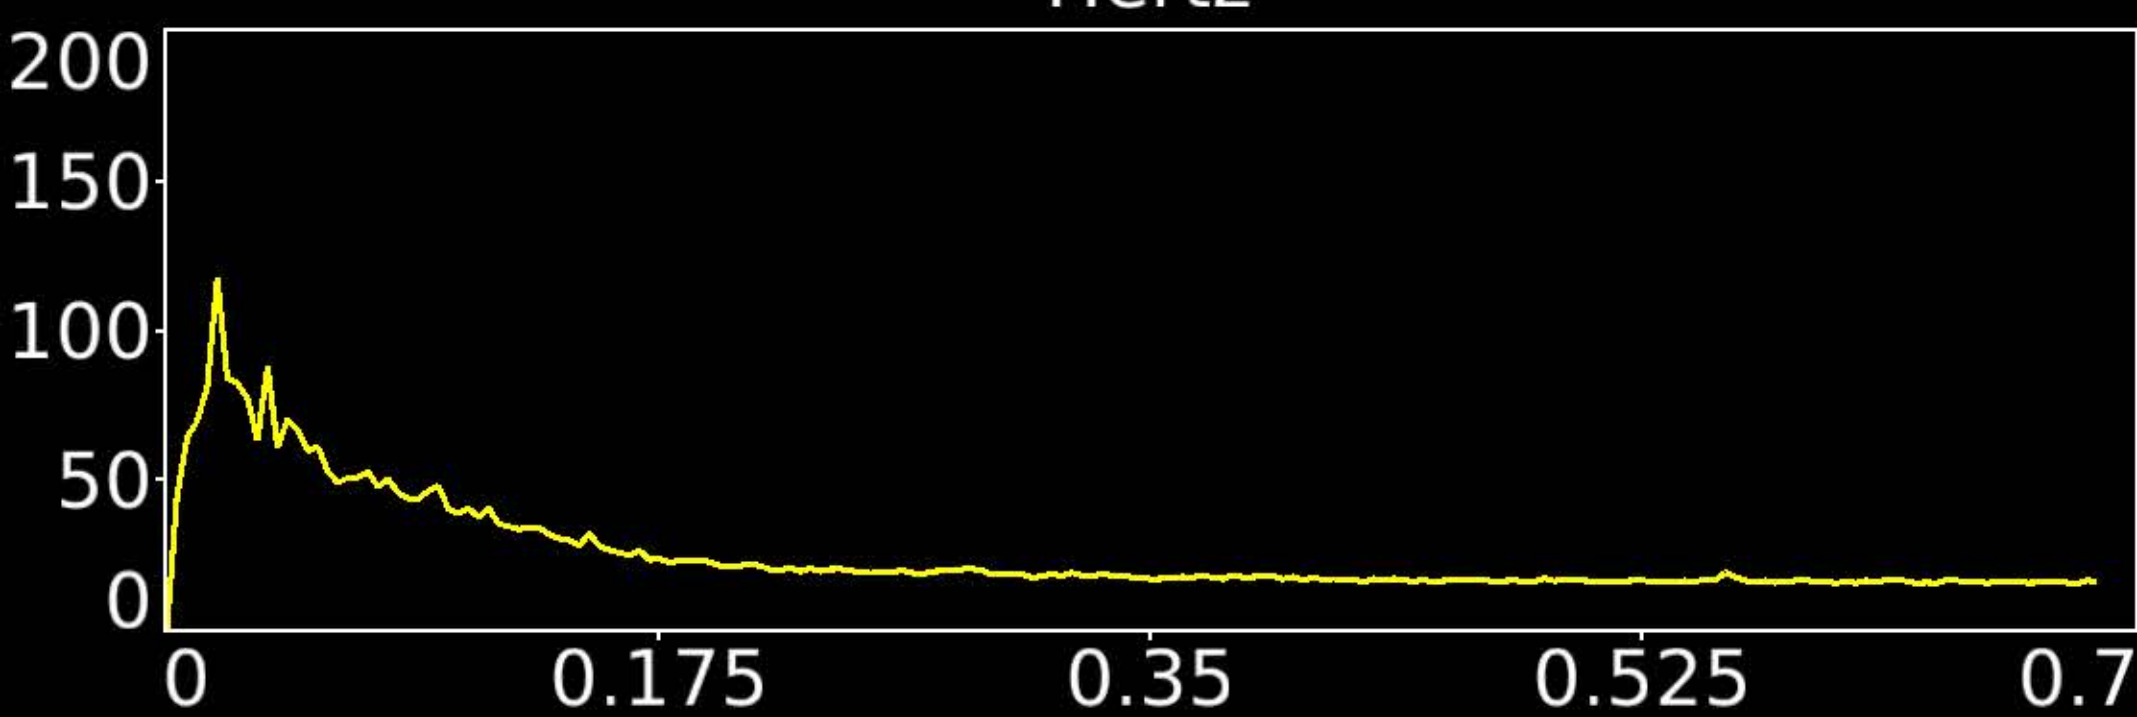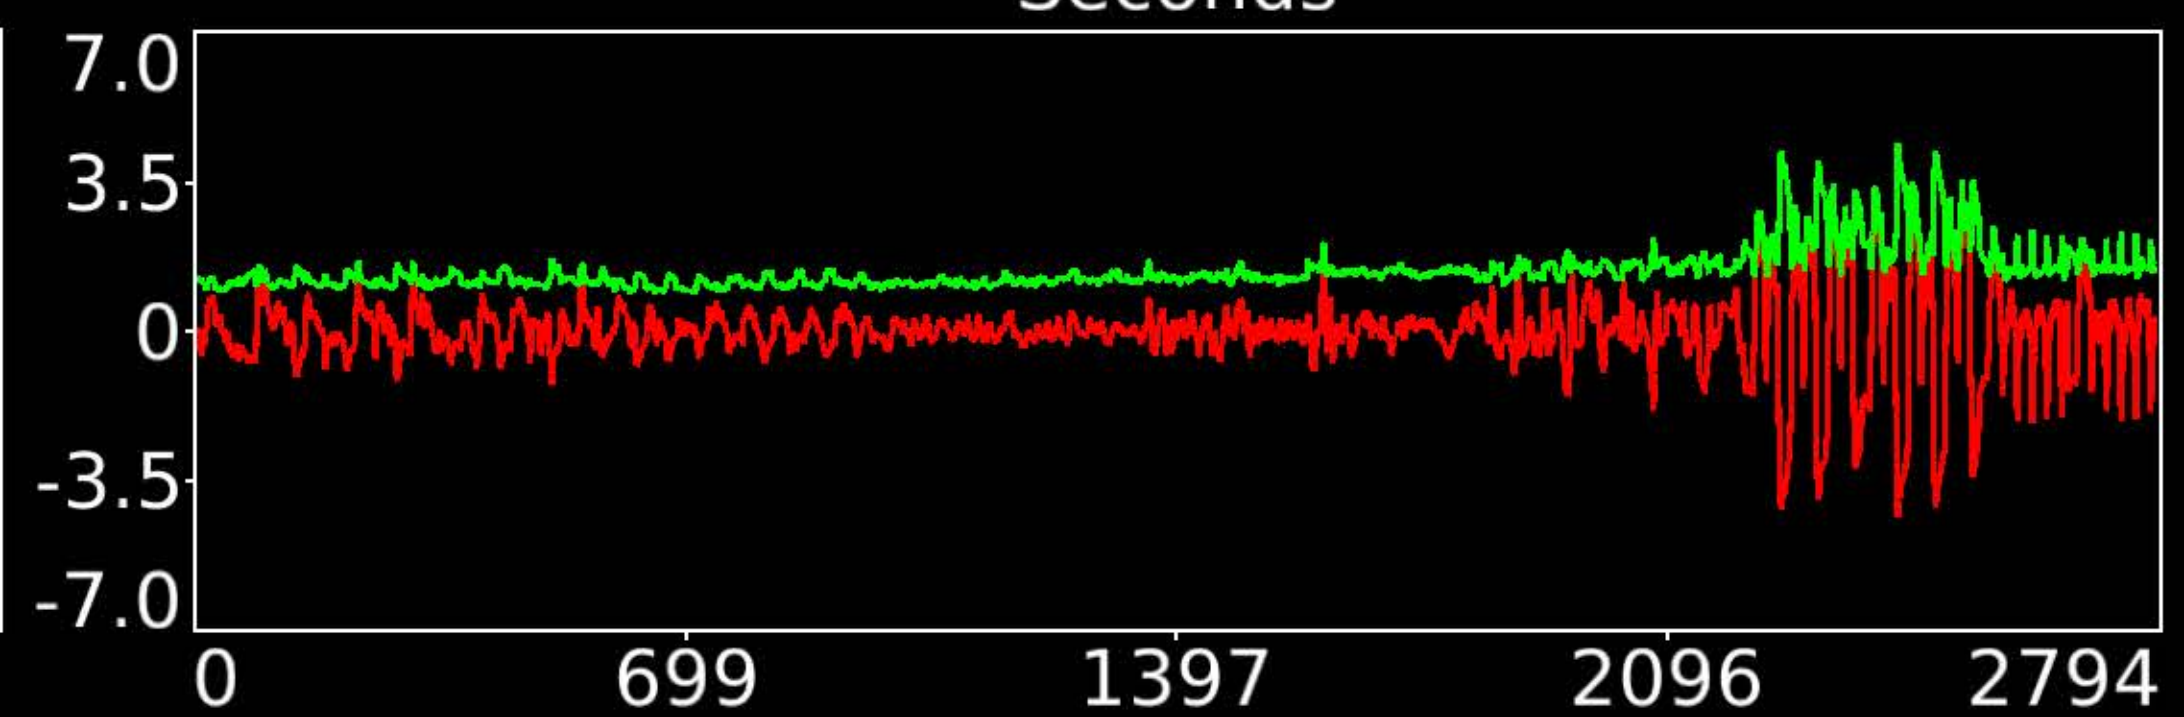

|                          |                            |                            |
|--------------------------|----------------------------|----------------------------|
| Number & Class: 3 Signal | Name: Relational Task Main |                            |
| RVT Correlated: No       | DVARS Dip Associated: No   | Cross-Subject Variable: No |
| Single Subject: No       | % Variance Explained: 3.63 | Globality Index: 0.42      |
| Rest Component: No       | Taskr Component: 10        | Task Modulated: Relational |

Rationale: Spatial map includes positive and negative patches that are correlated with a specific task design



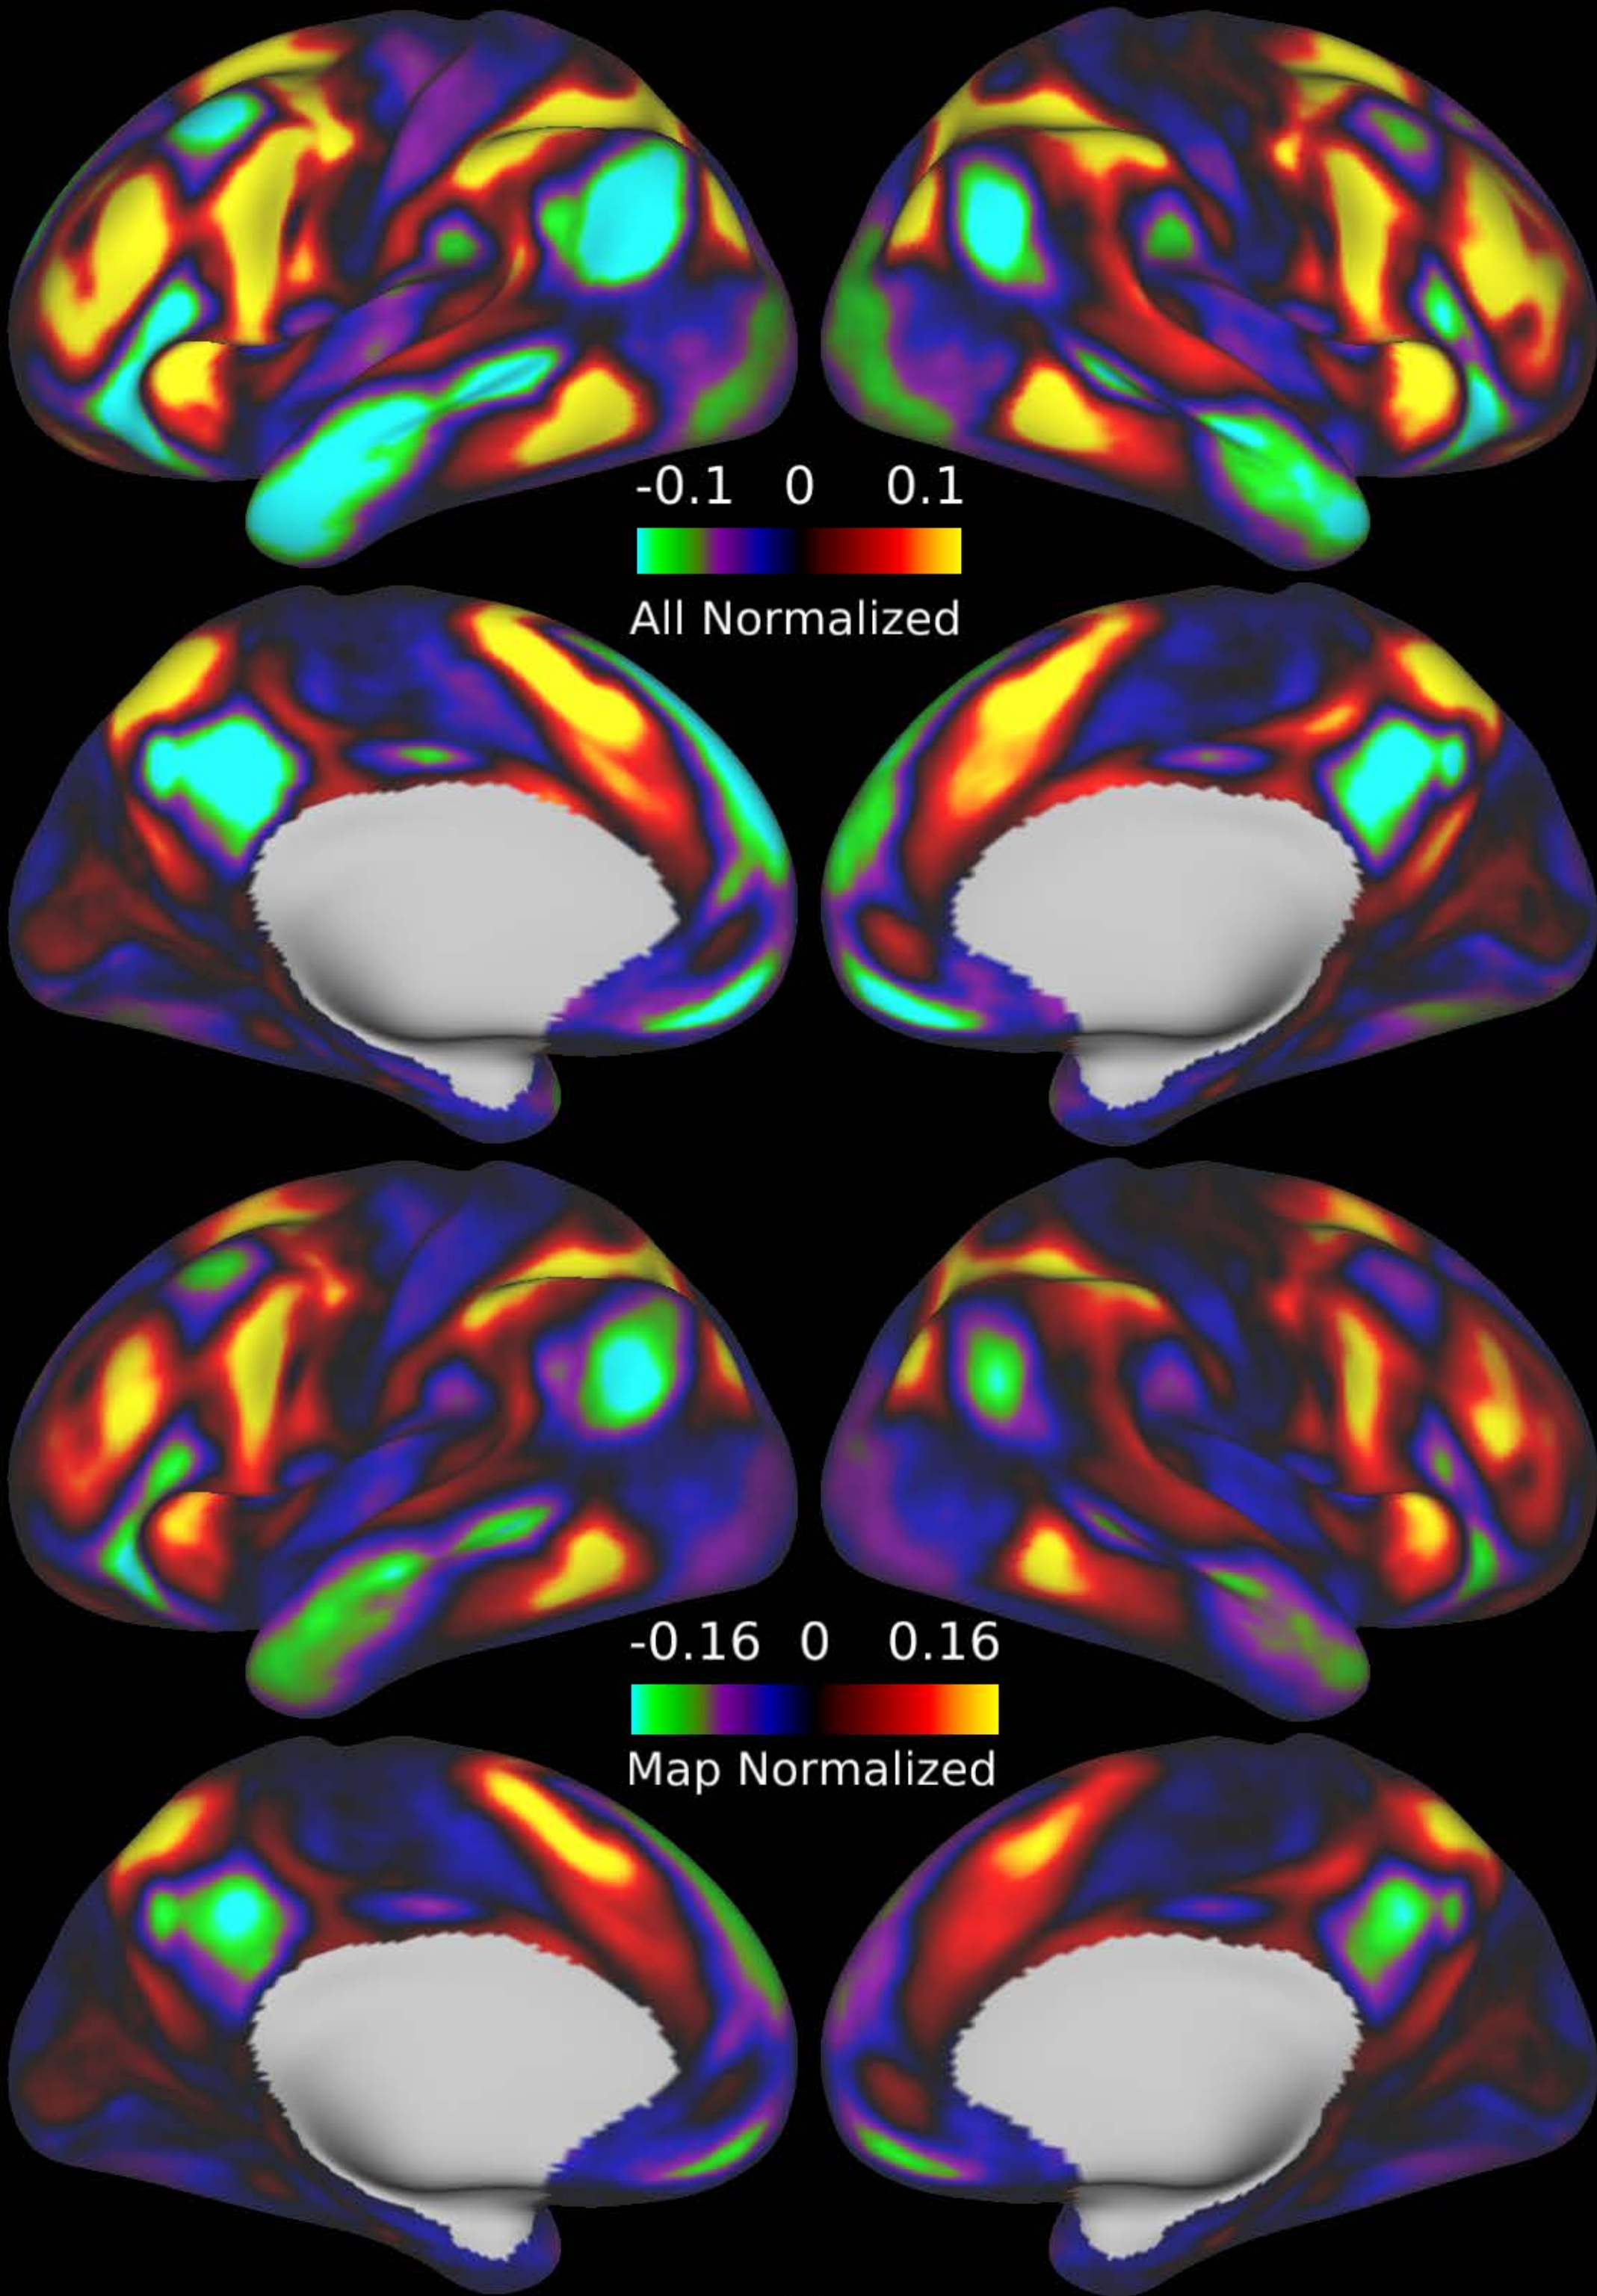

Hertz

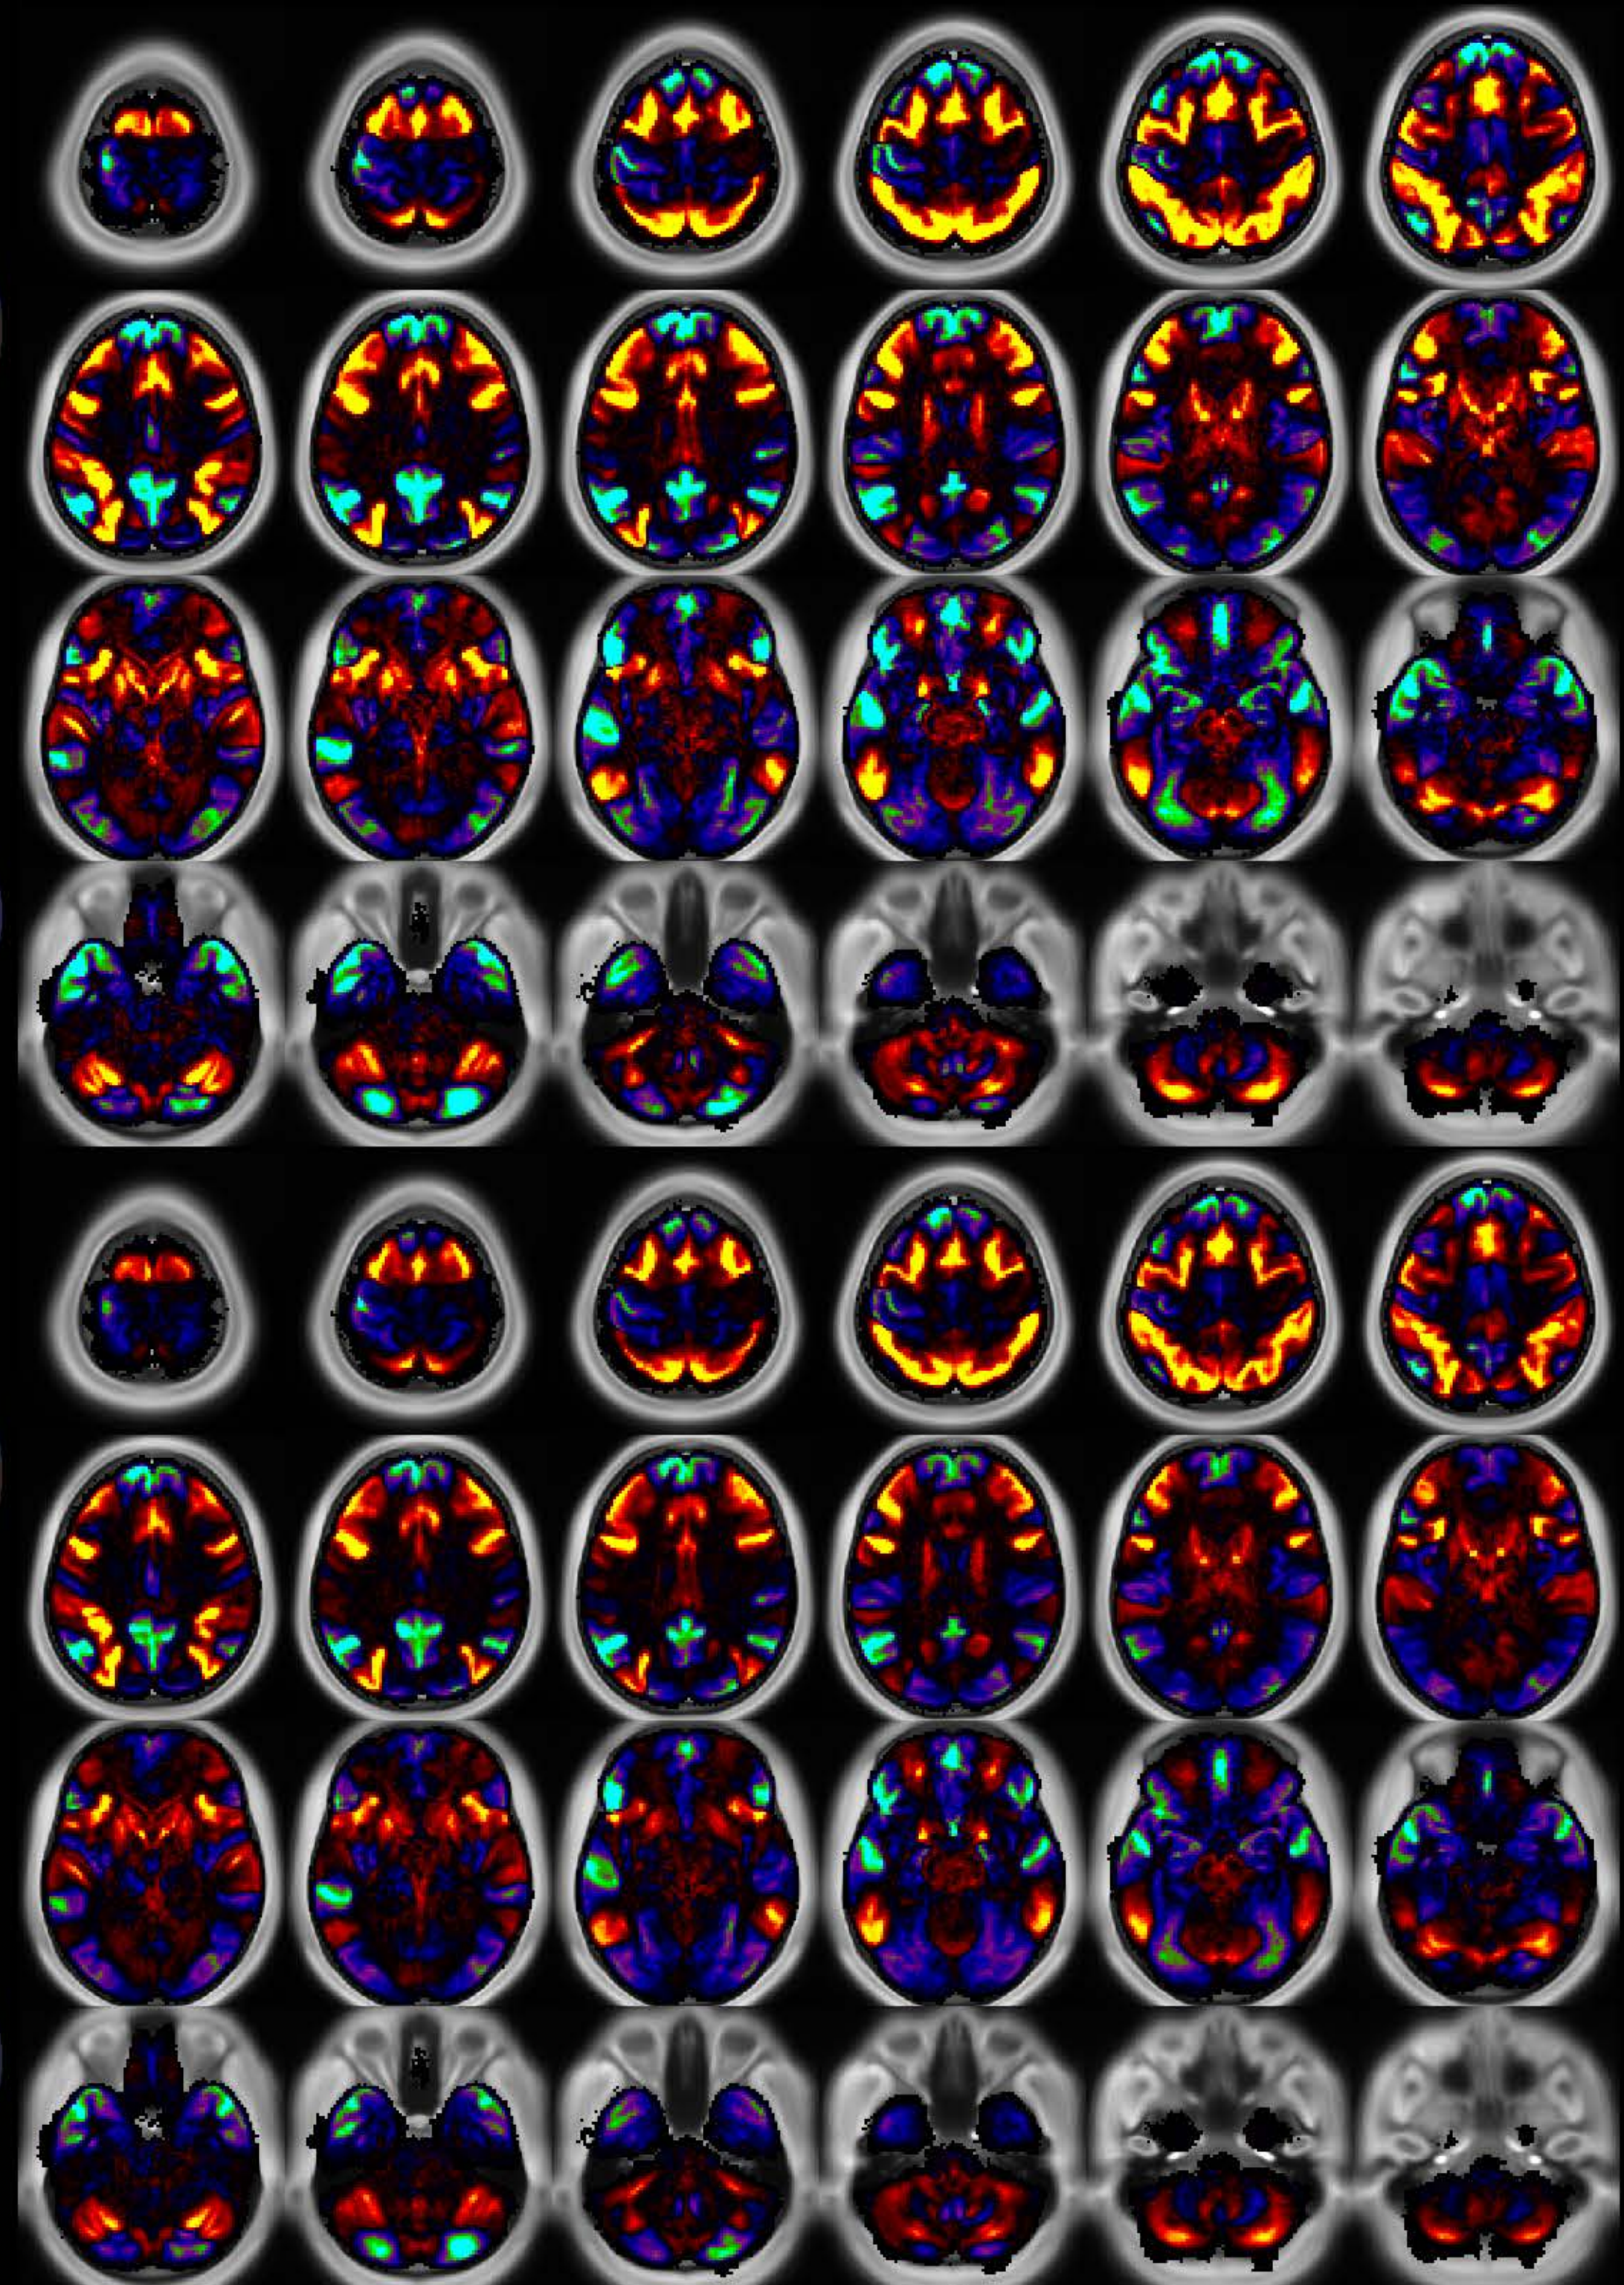

Seconds

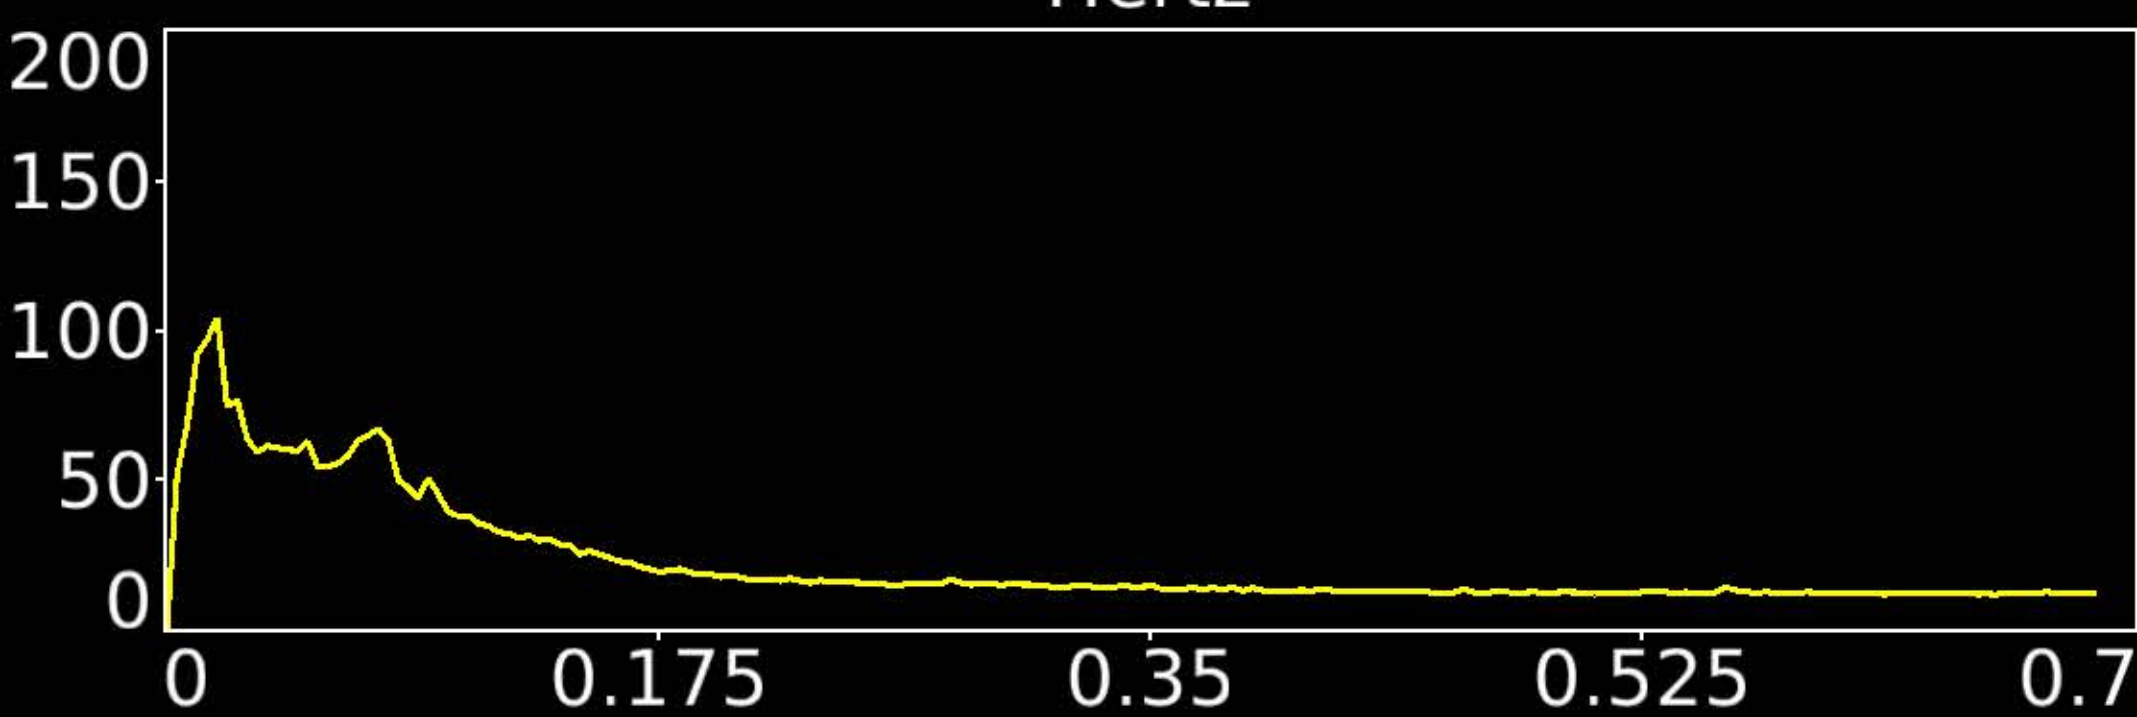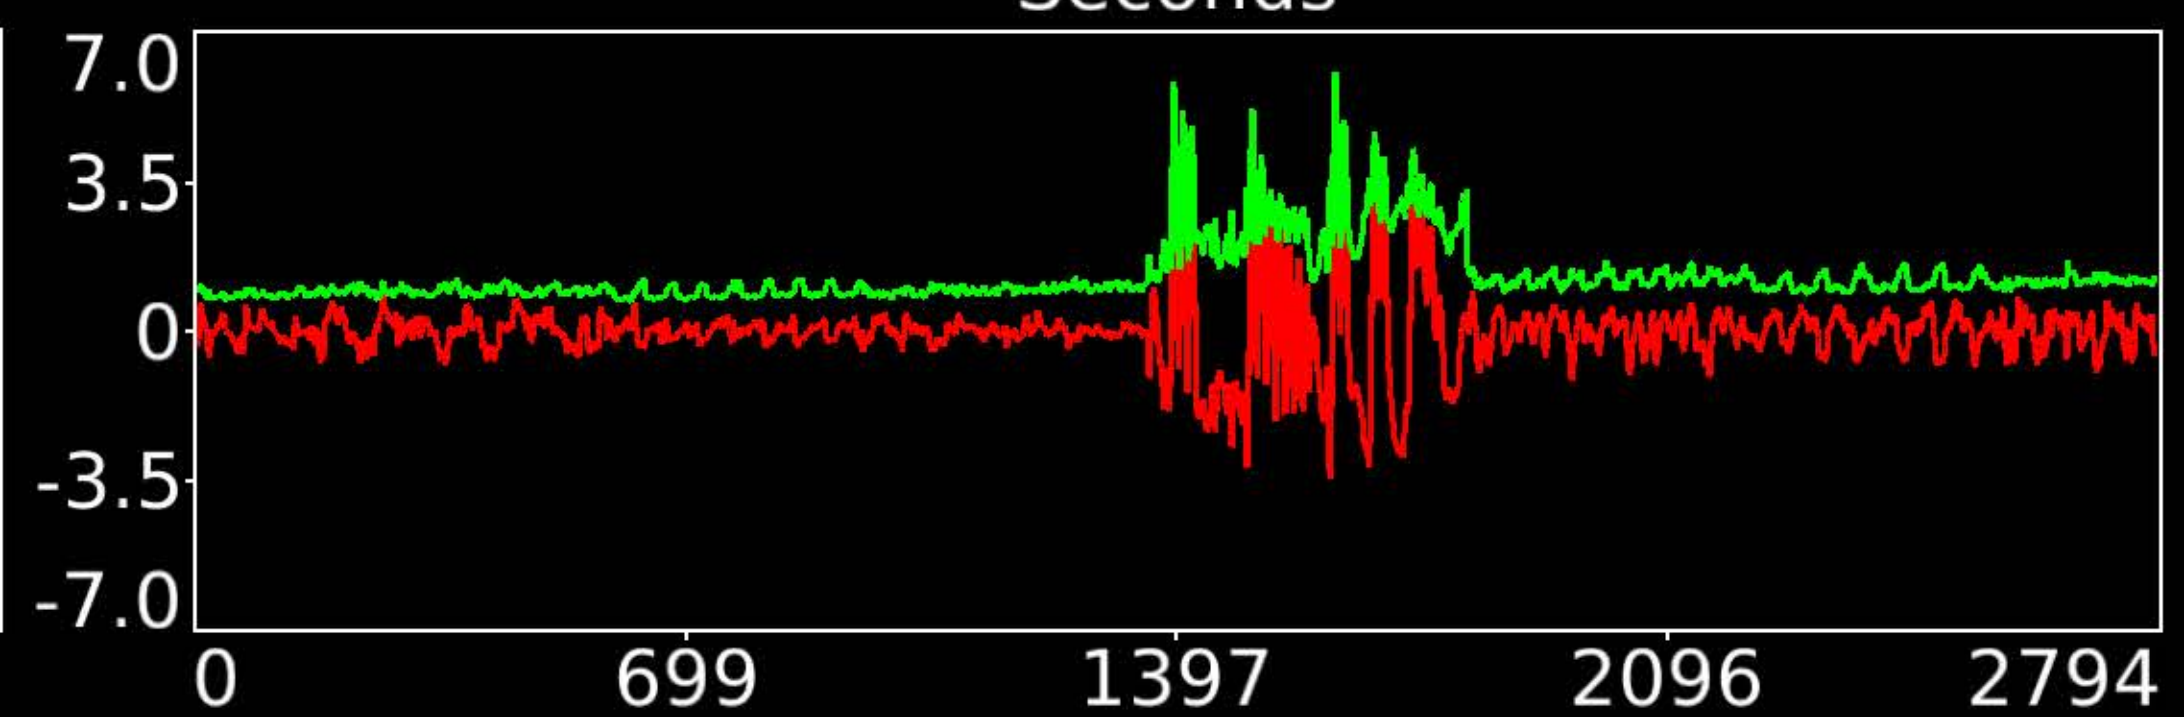

|                          |                                  |                            |
|--------------------------|----------------------------------|----------------------------|
| Number & Class: 4 Signal | Name: Language Task Math > Story |                            |
| RVT Correlated: No       | DVARS Dip Associated: No         | Cross-Subject Variable: No |
| Single Subject: No       | % Variance Explained: 3.32       | Globality Index: 0.08      |
| Rest Component: 12       | Taskr Component: 12              | Task Modulated: Language   |

Rationale: Spatial map includes positive and negative patches that are correlated with a specific task design



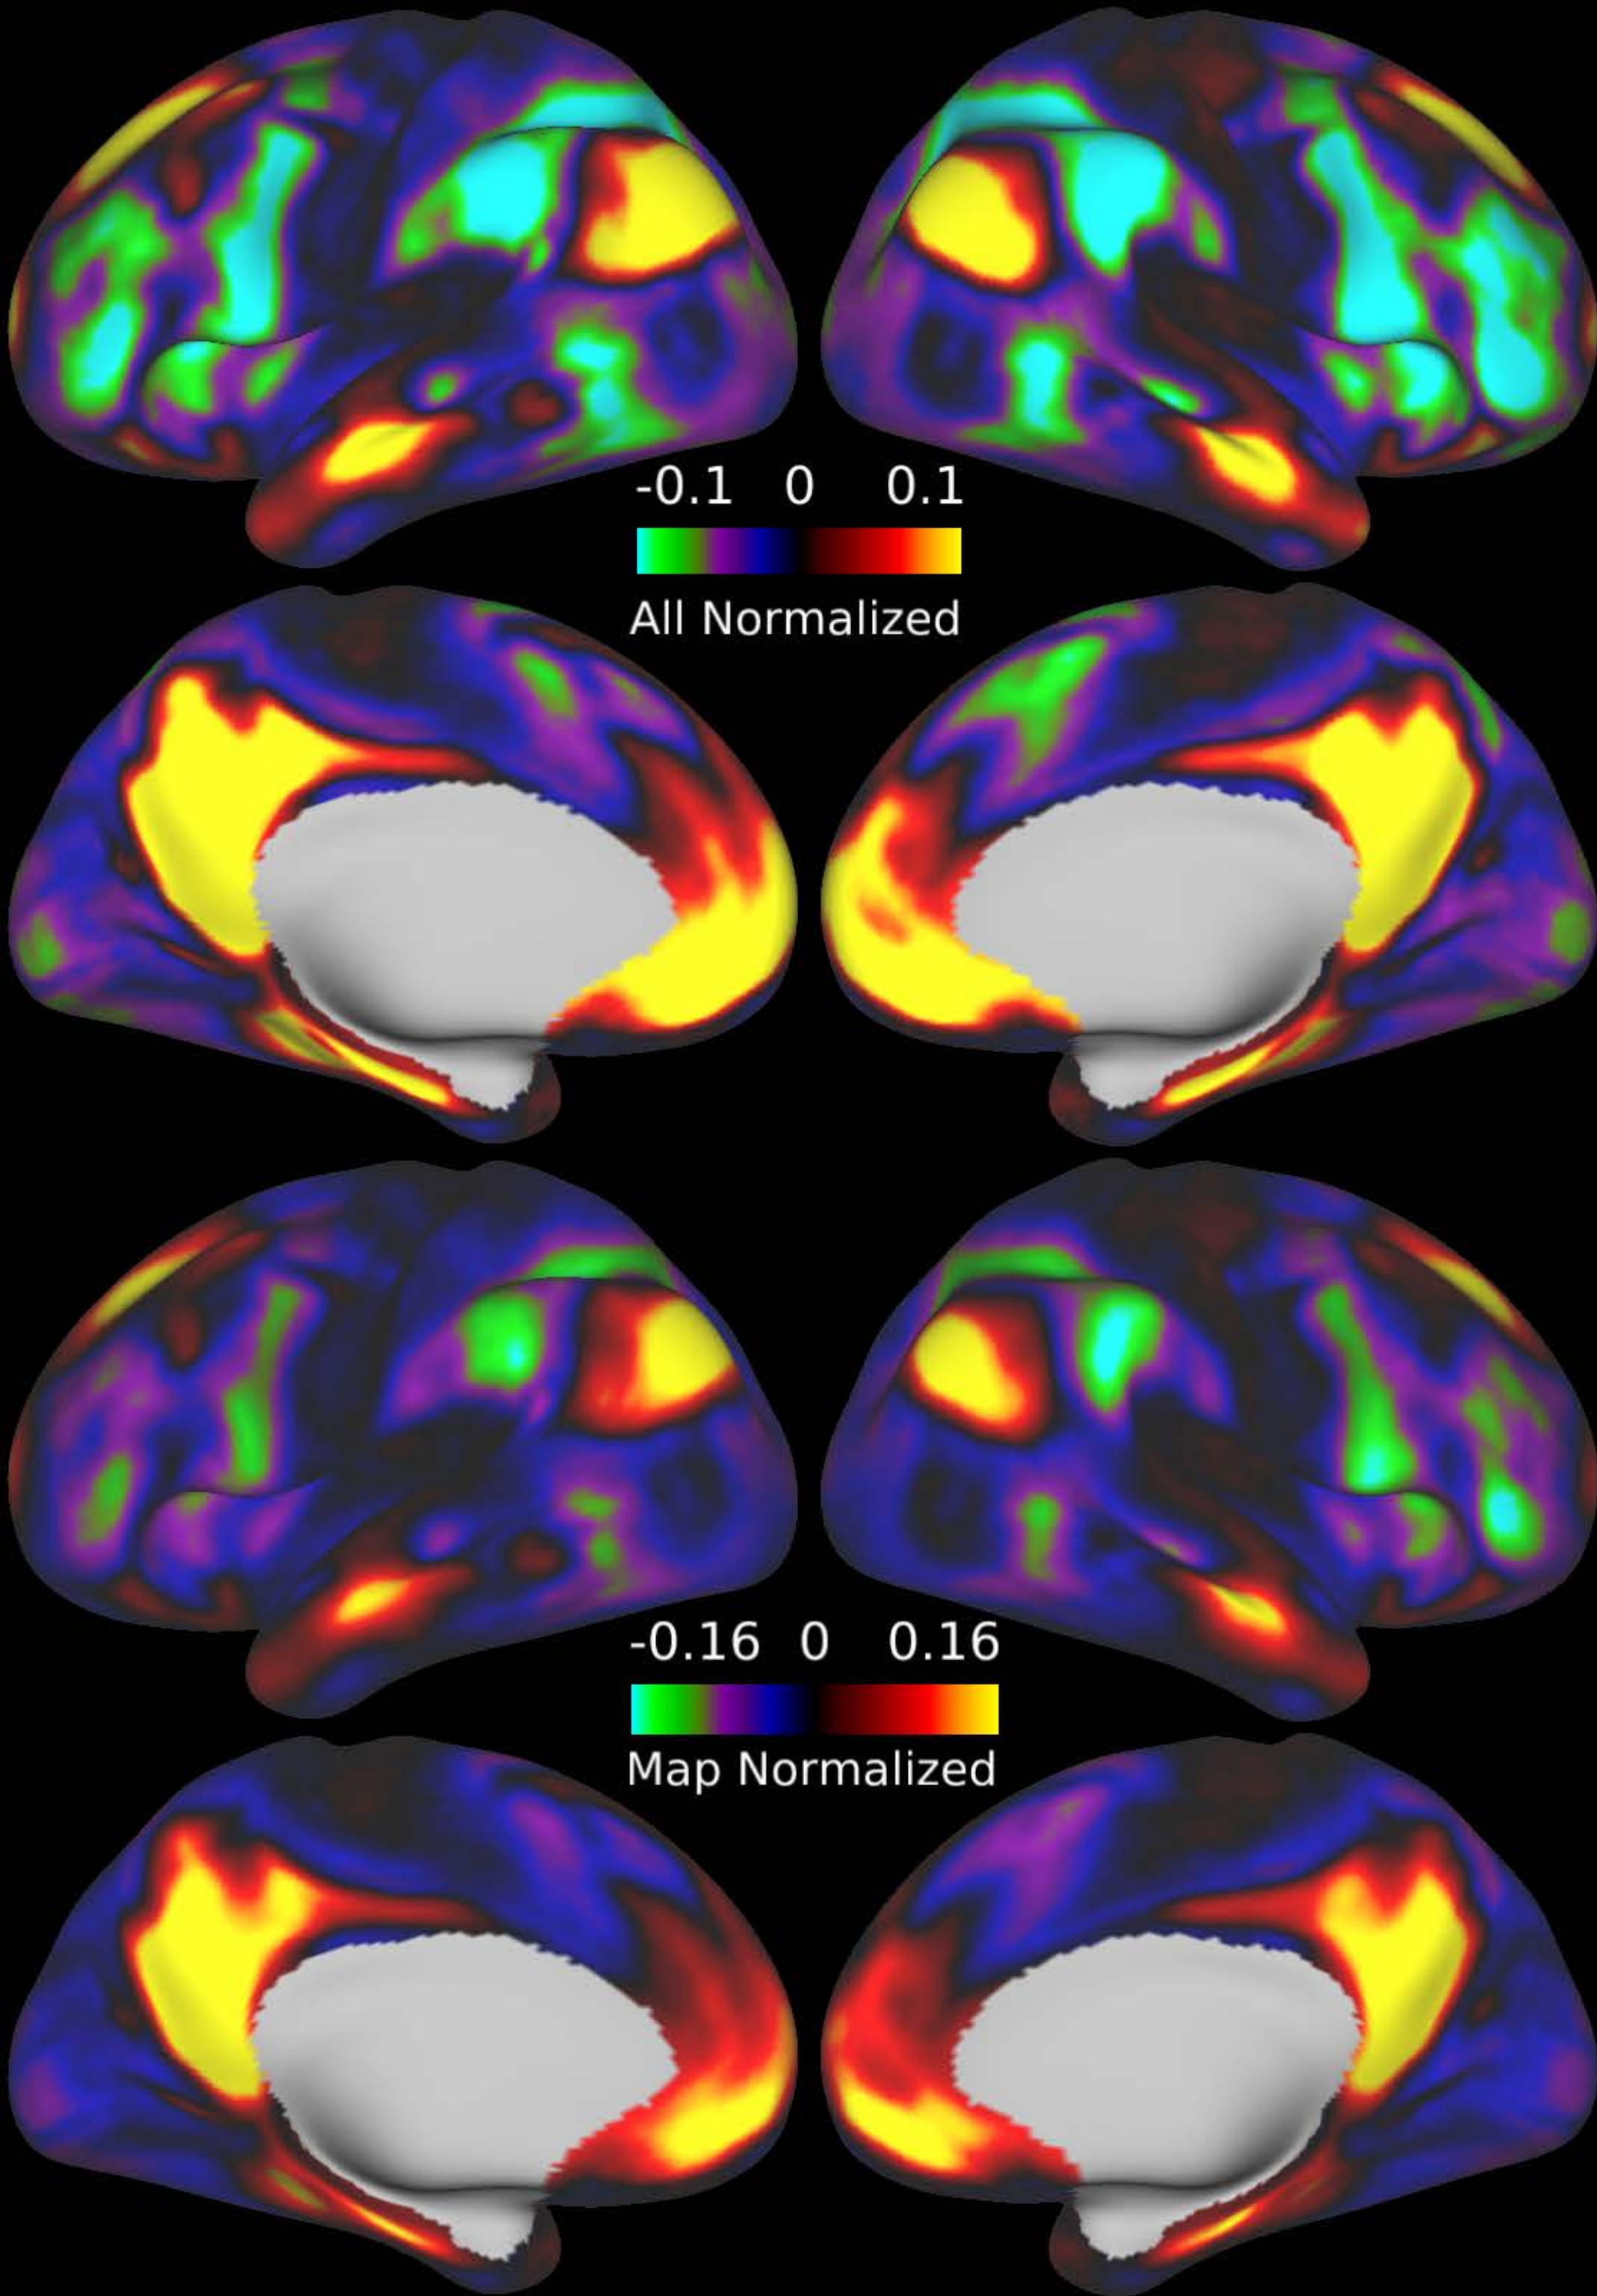

Hertz

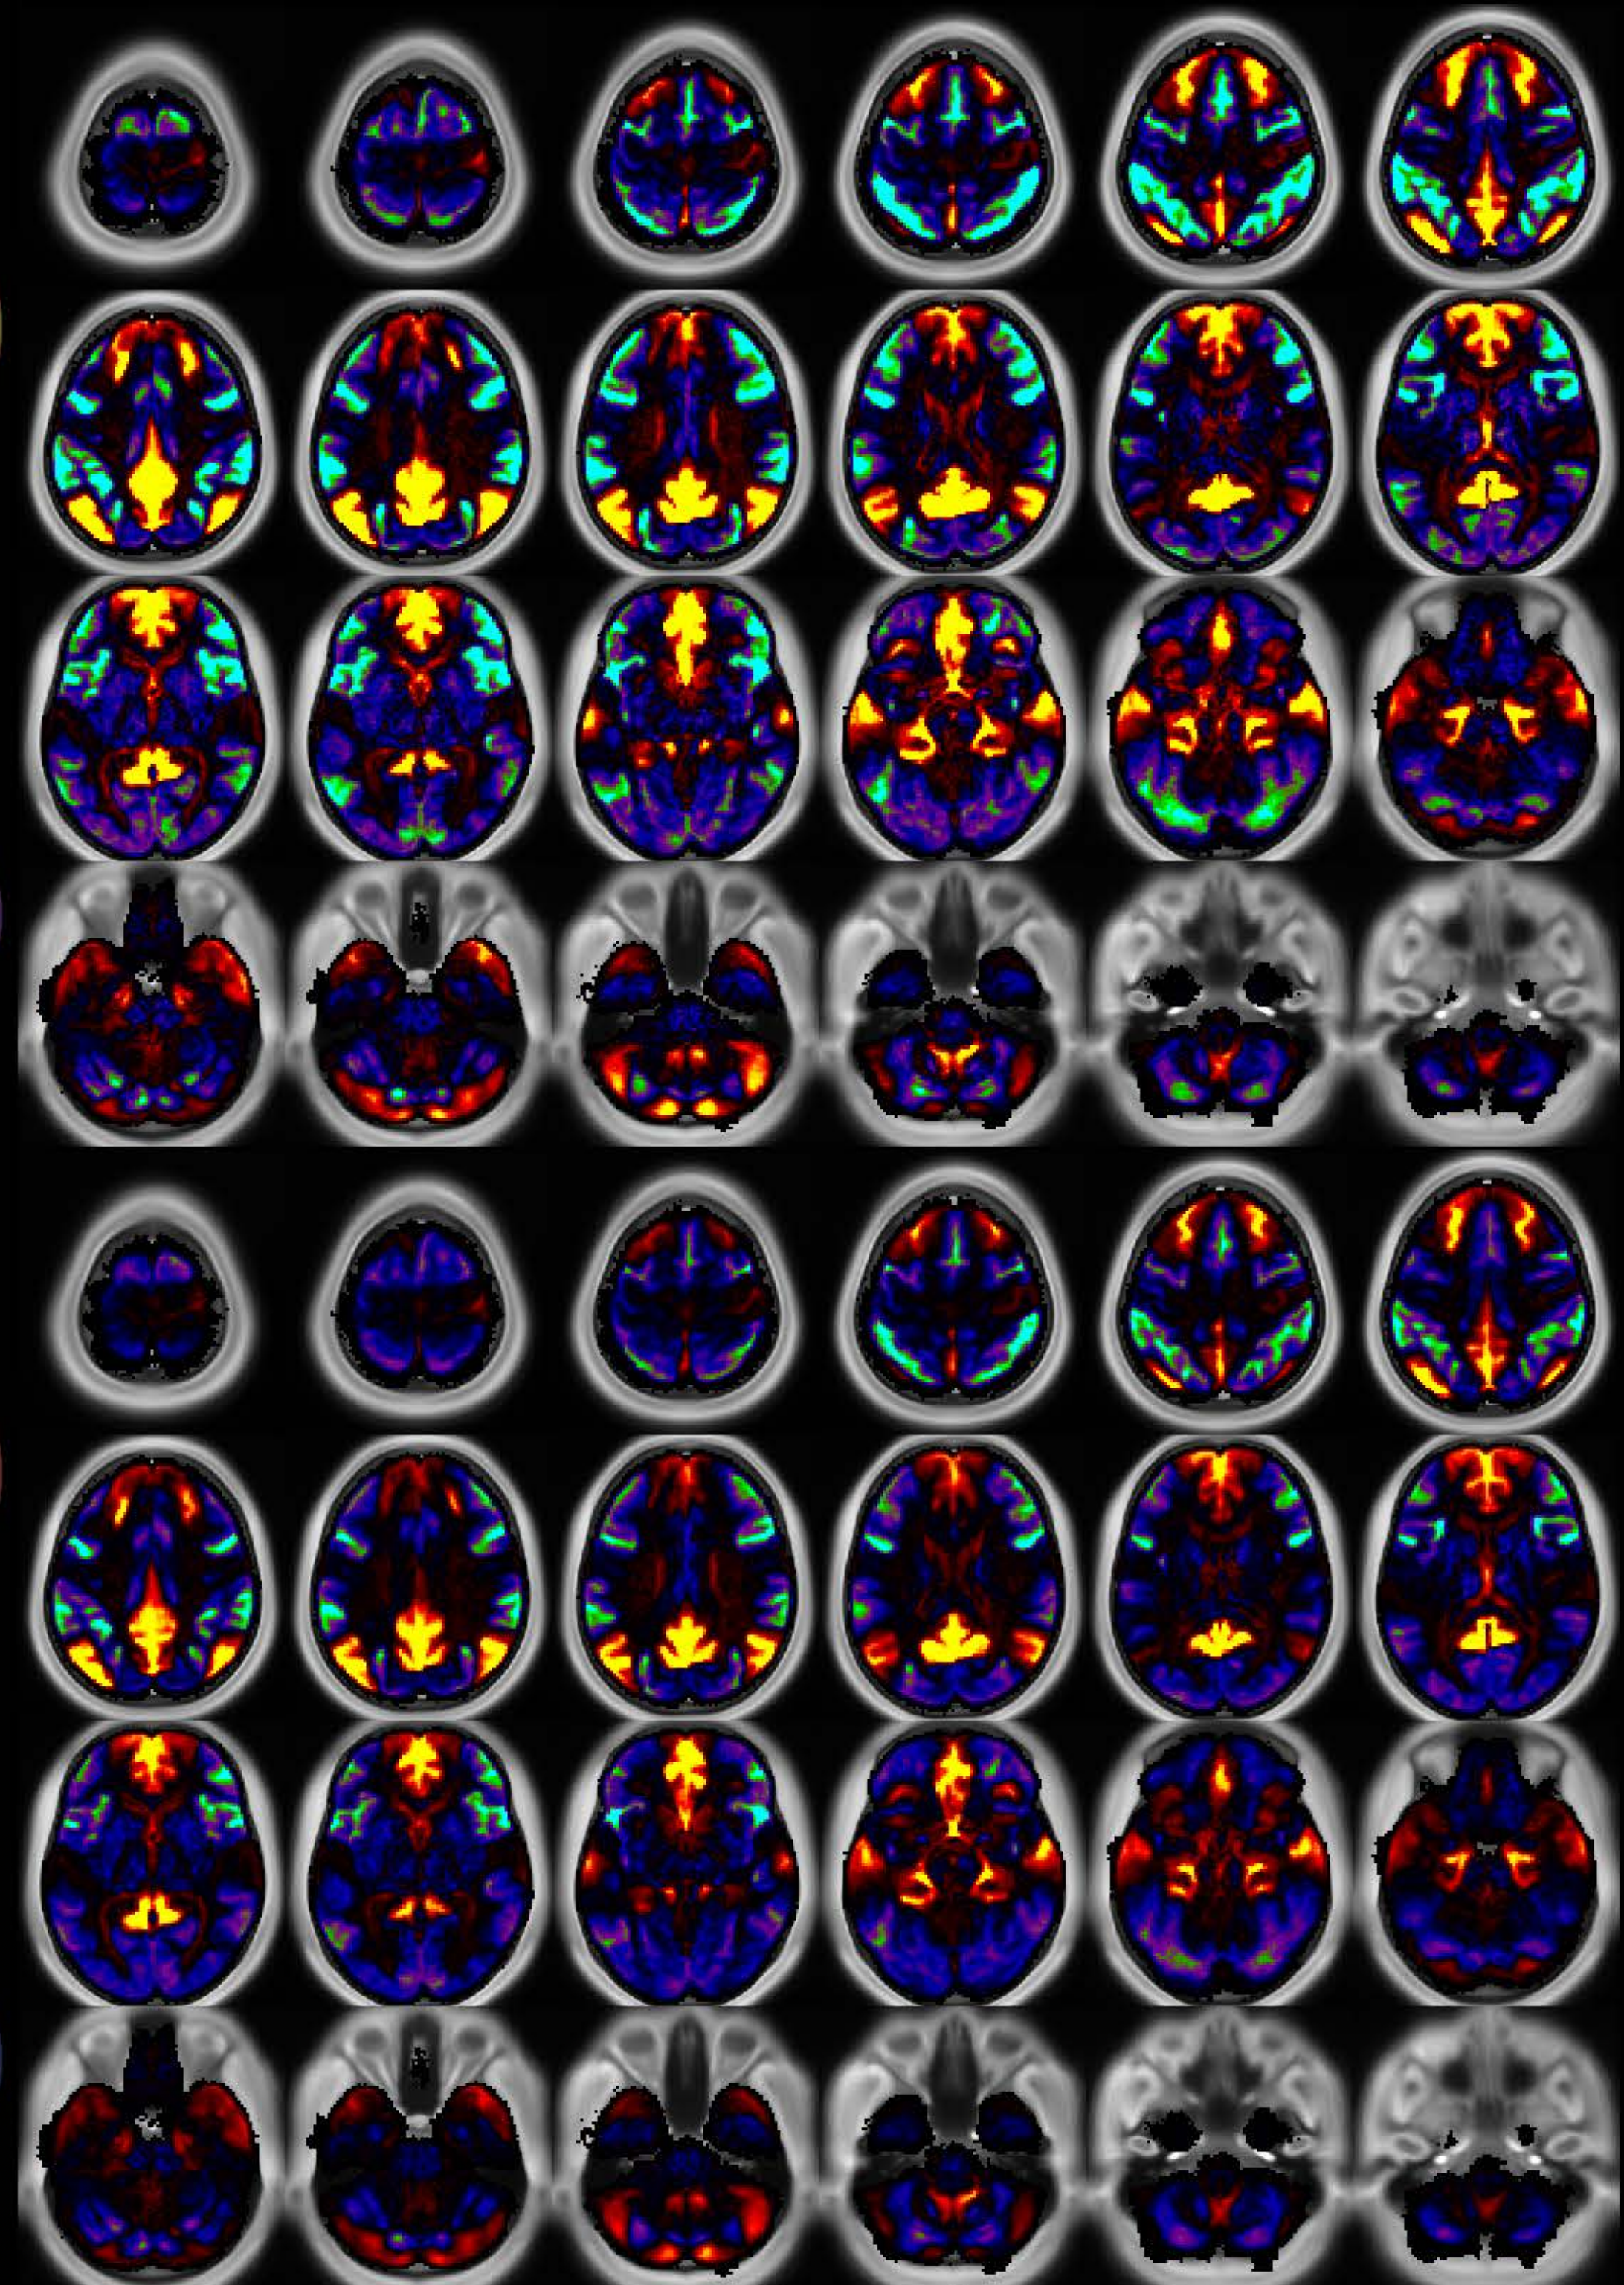

Seconds

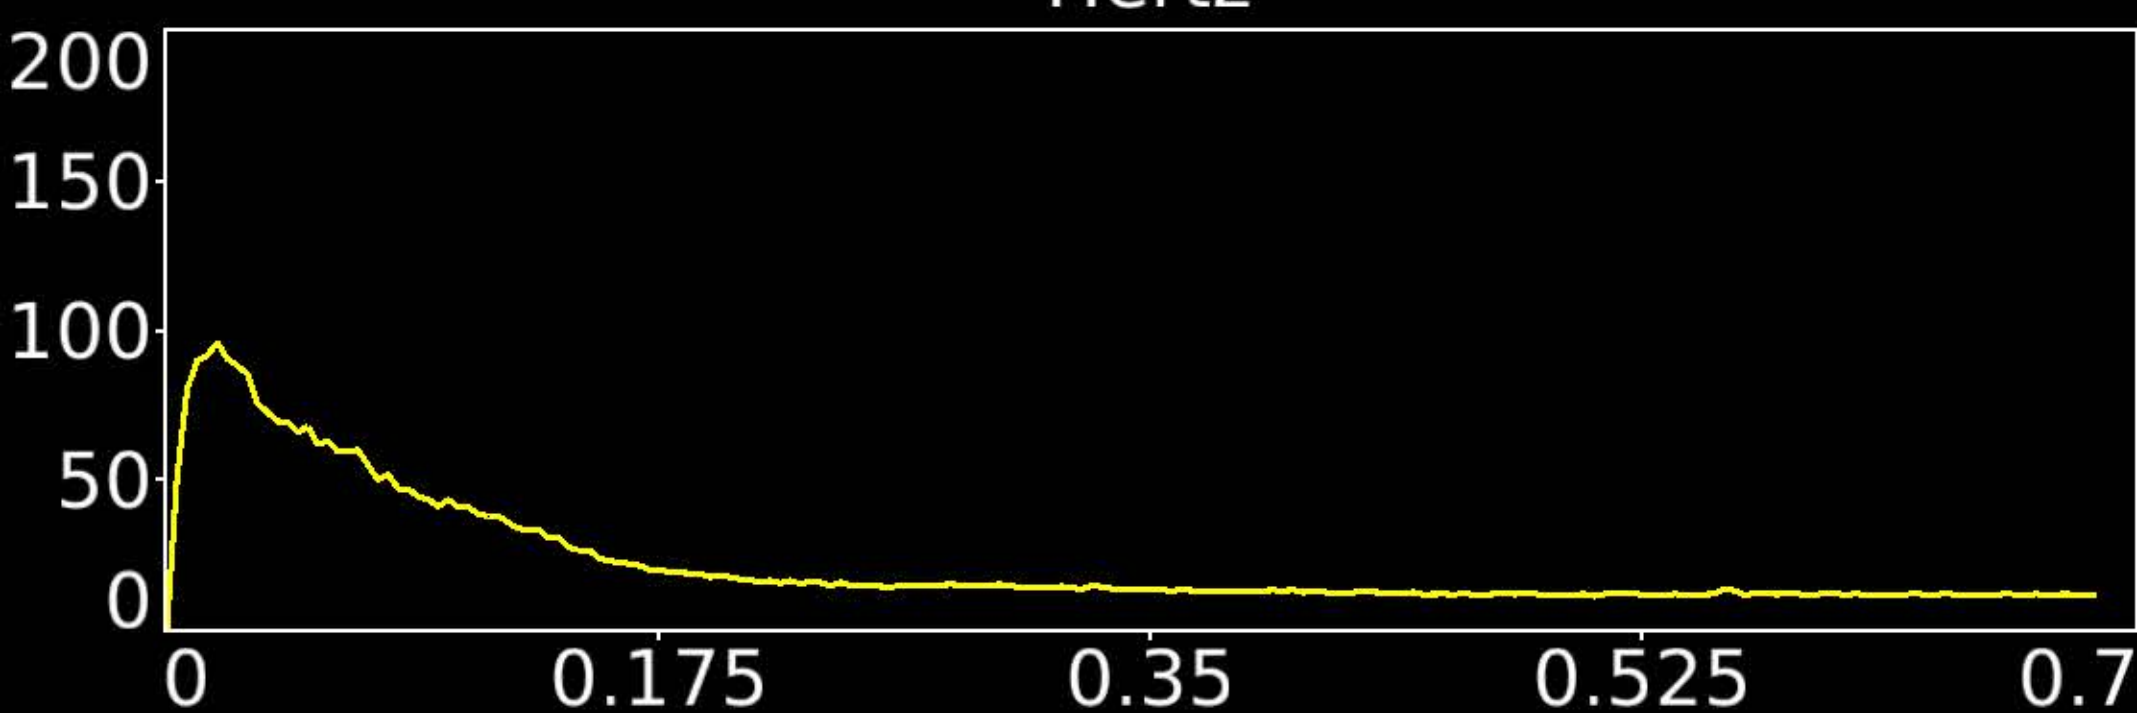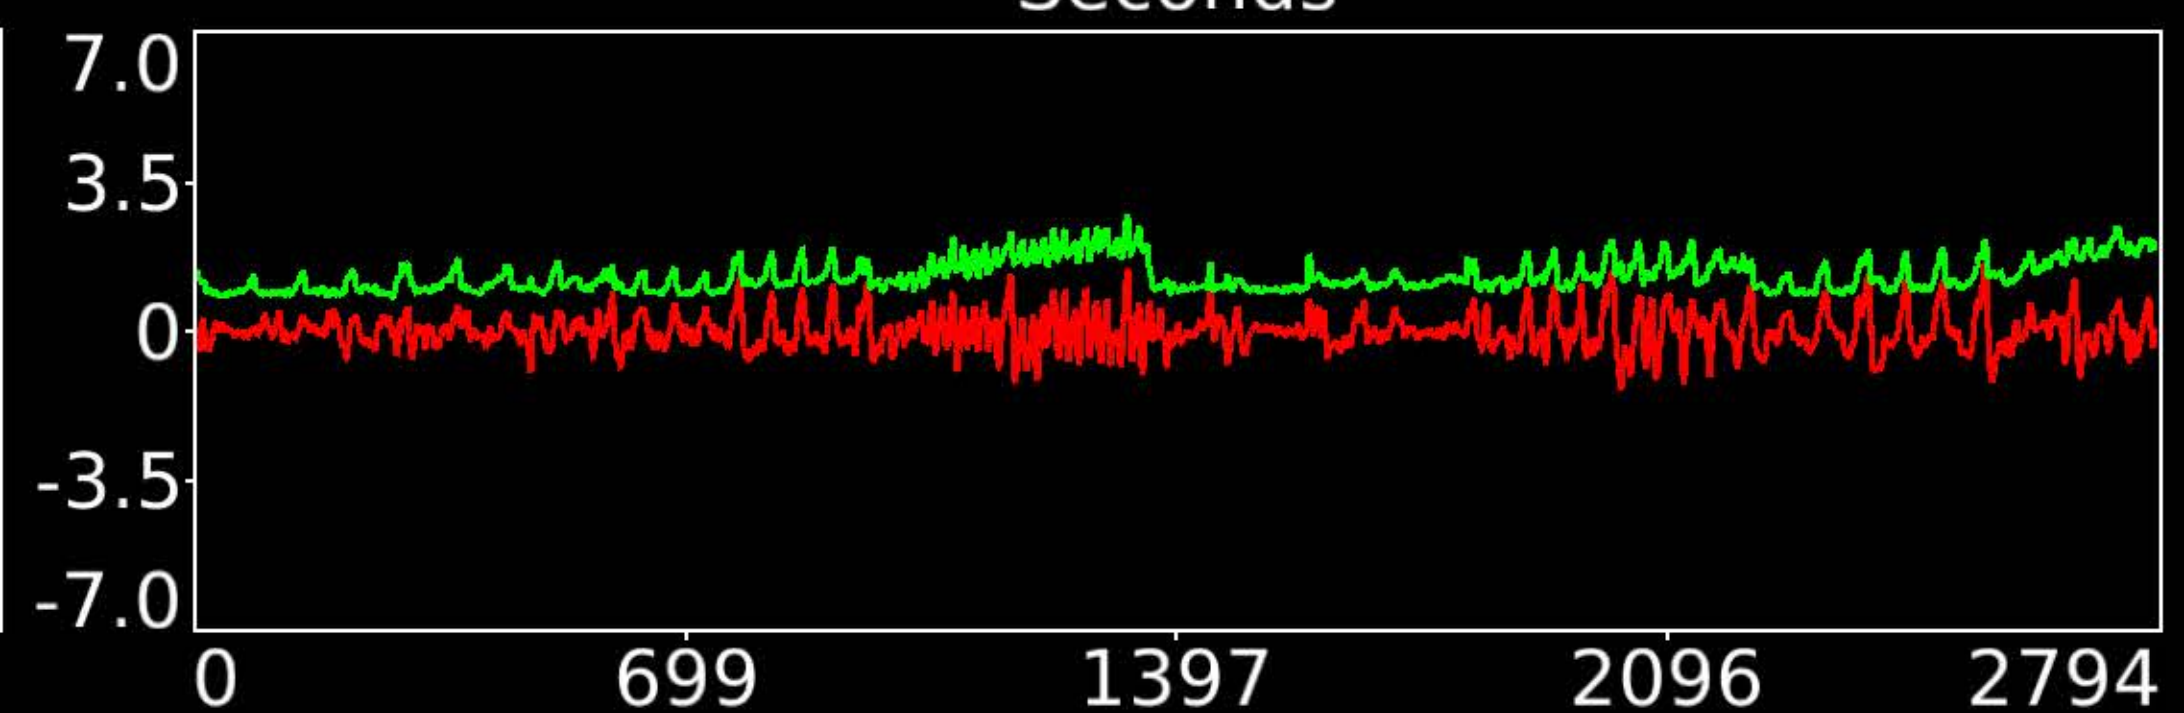

|                                                                                                                   |                           |                                 |  |
|-------------------------------------------------------------------------------------------------------------------|---------------------------|---------------------------------|--|
| Number & Class: 5 Signal                                                                                          |                           | Name: Primary Default Mode      |  |
| RVT Correlated: No                                                                                                | DVARS Dip Associated: No  | Cross-Subject Variable: Yes     |  |
| Single Subject: No                                                                                                | % Variance Explained: 3.3 | Globality Index: 0.95           |  |
| Rest Component: 10                                                                                                | Taskr Component: 2        | Task Modulated: Motor + Emotion |  |
| Rationale: Spatial map includes positive and negative patches that respect known RSNs (e.g. Default Mode Network) |                           |                                 |  |



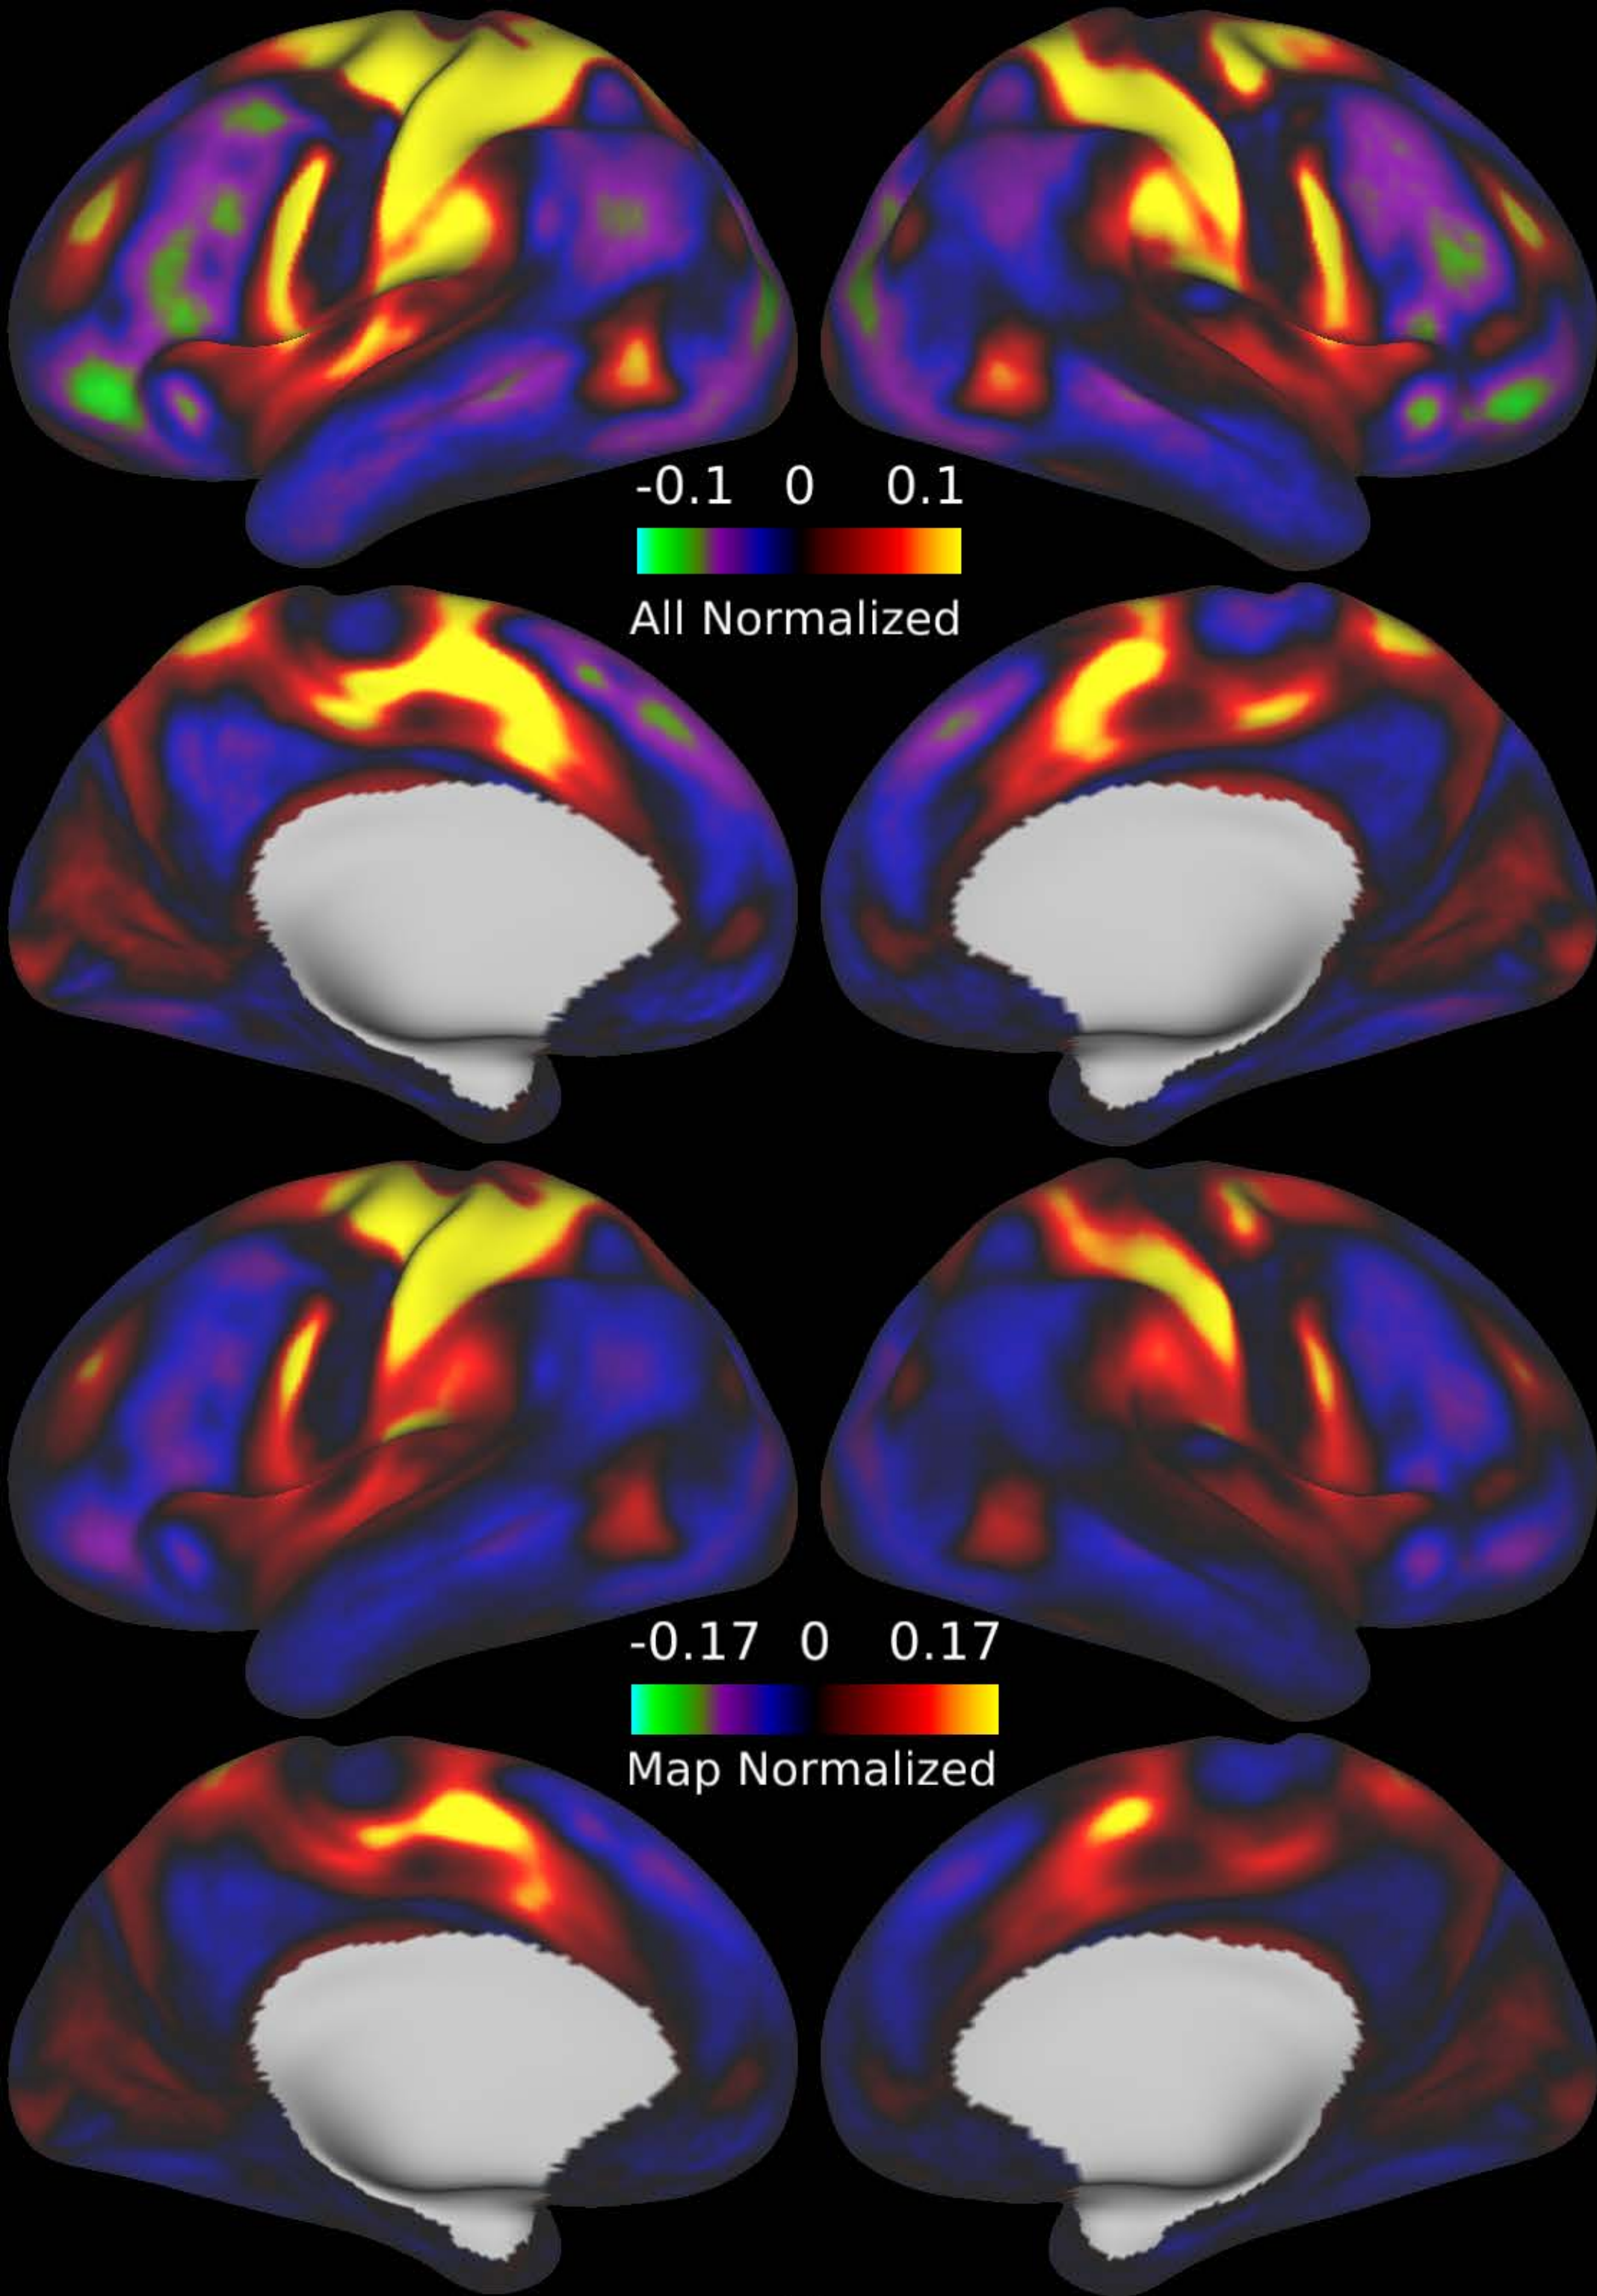

Hertz

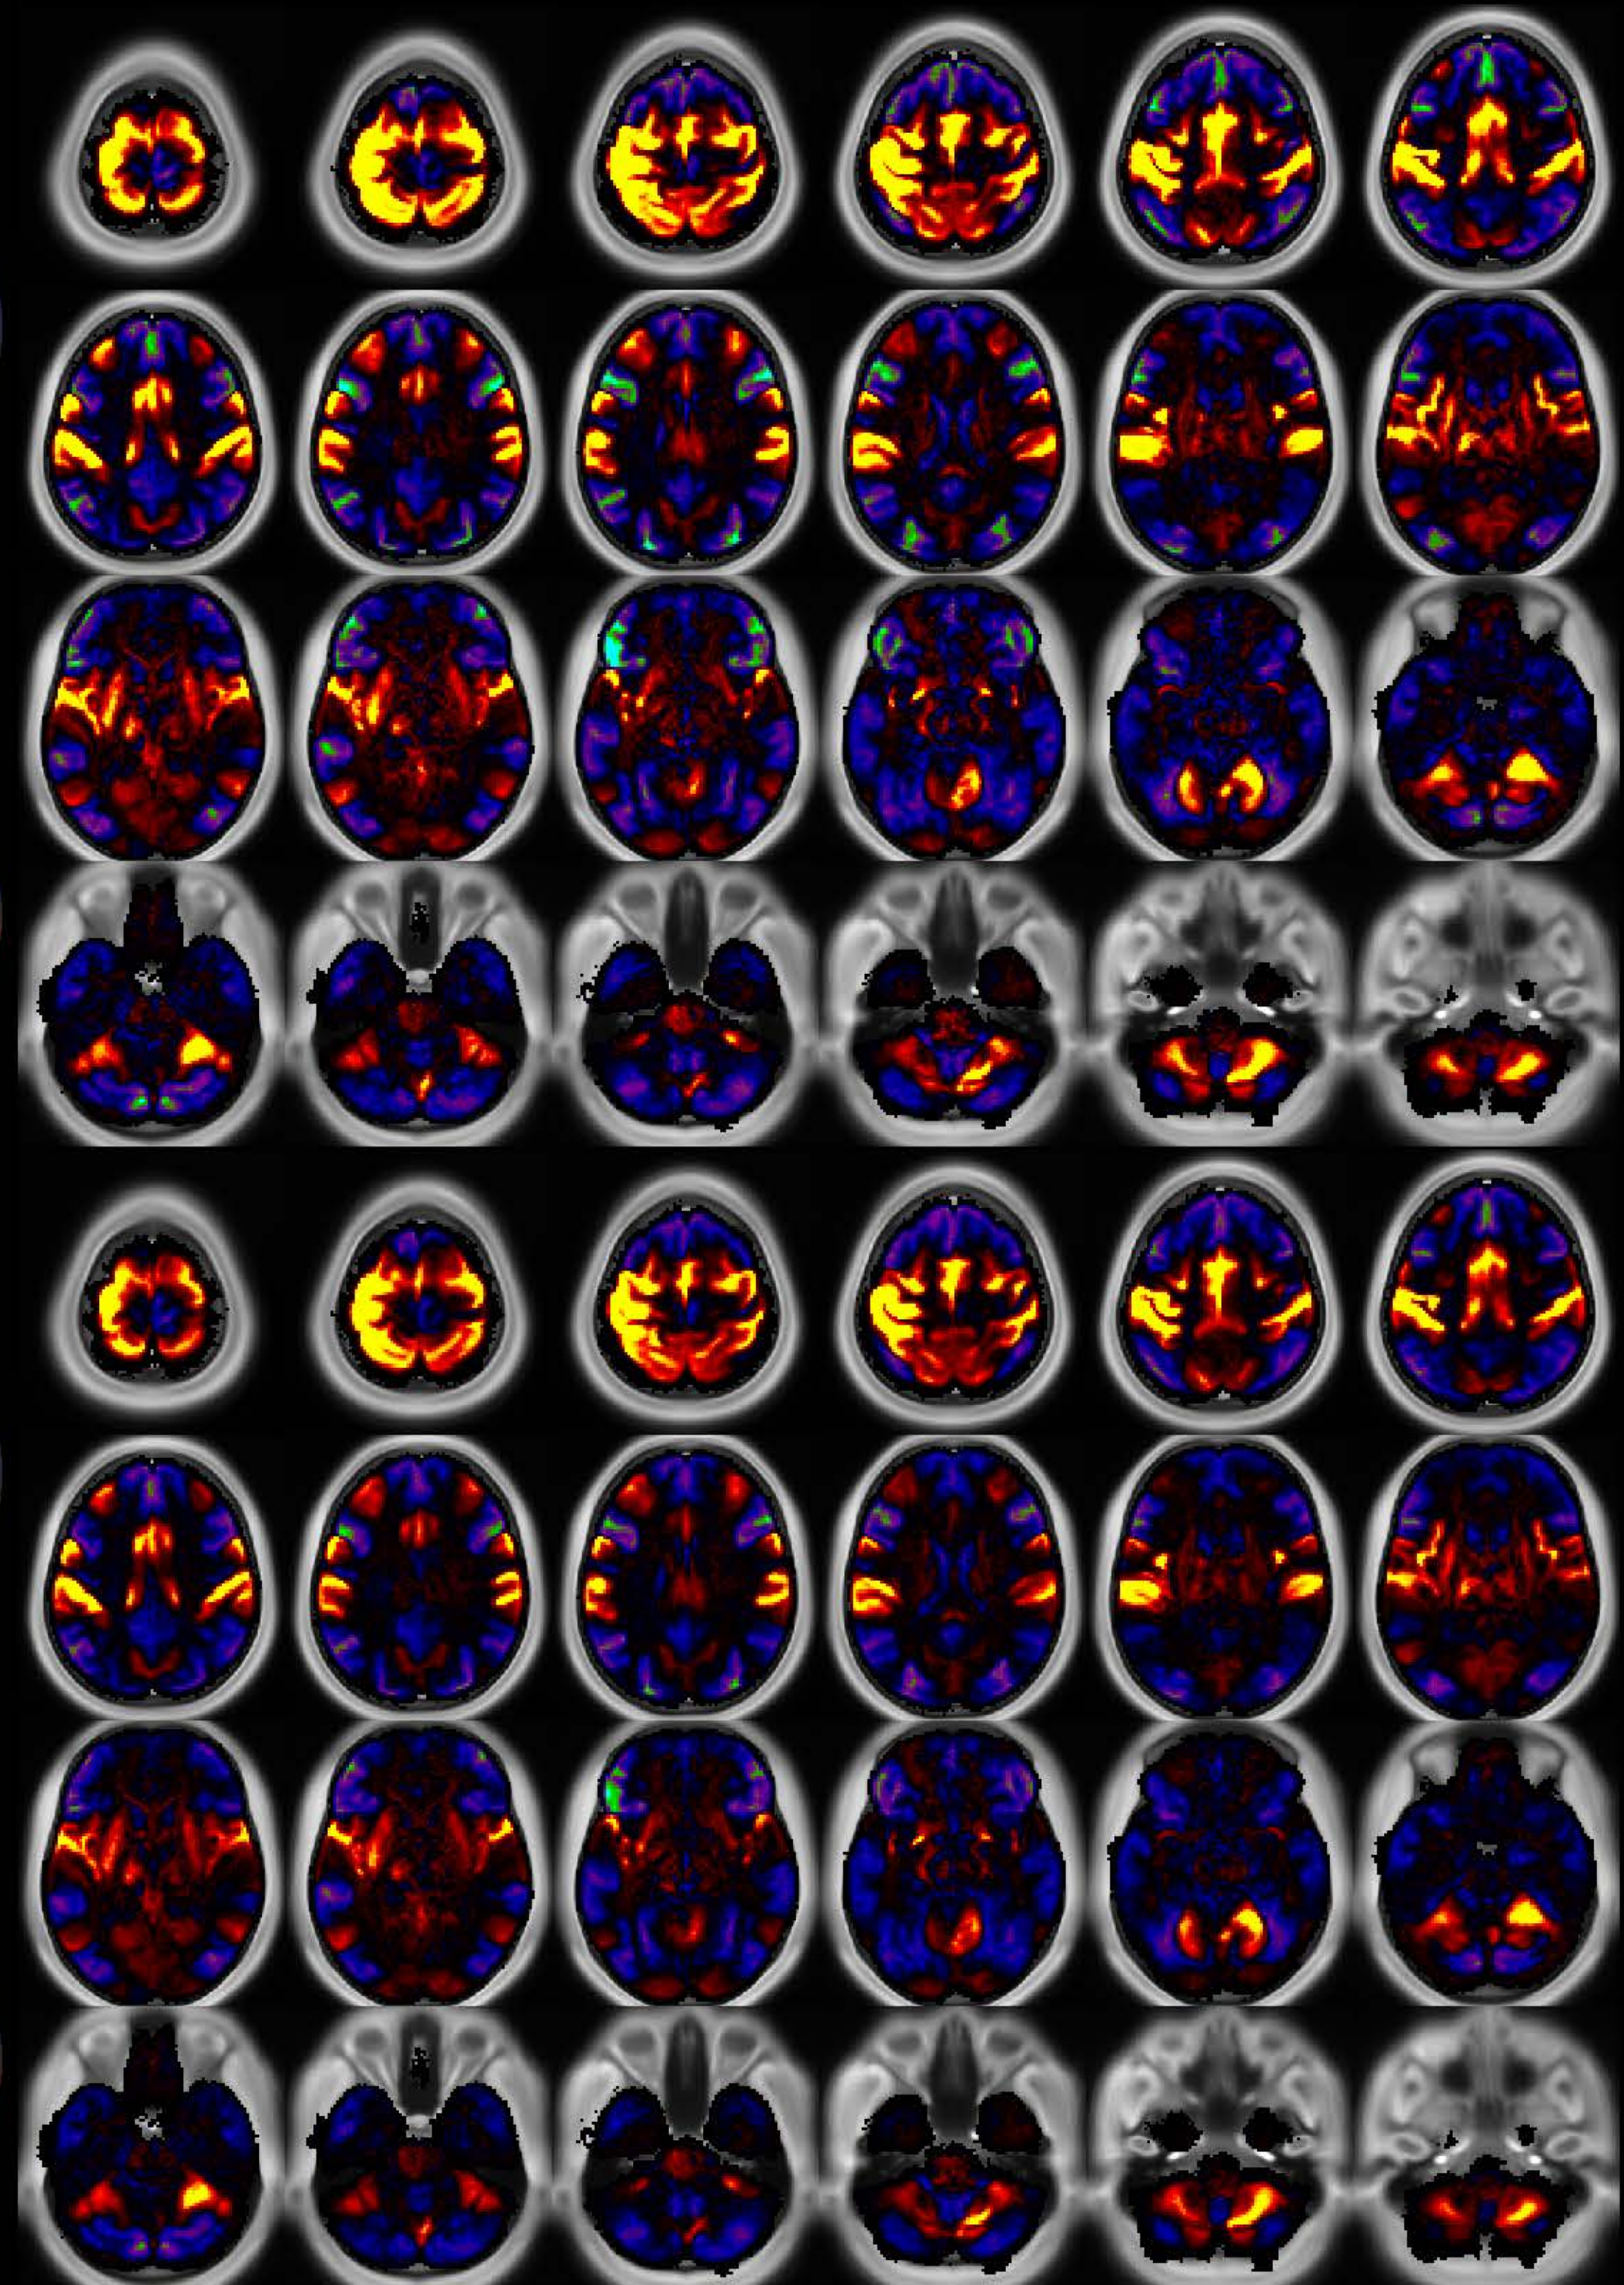

Seconds

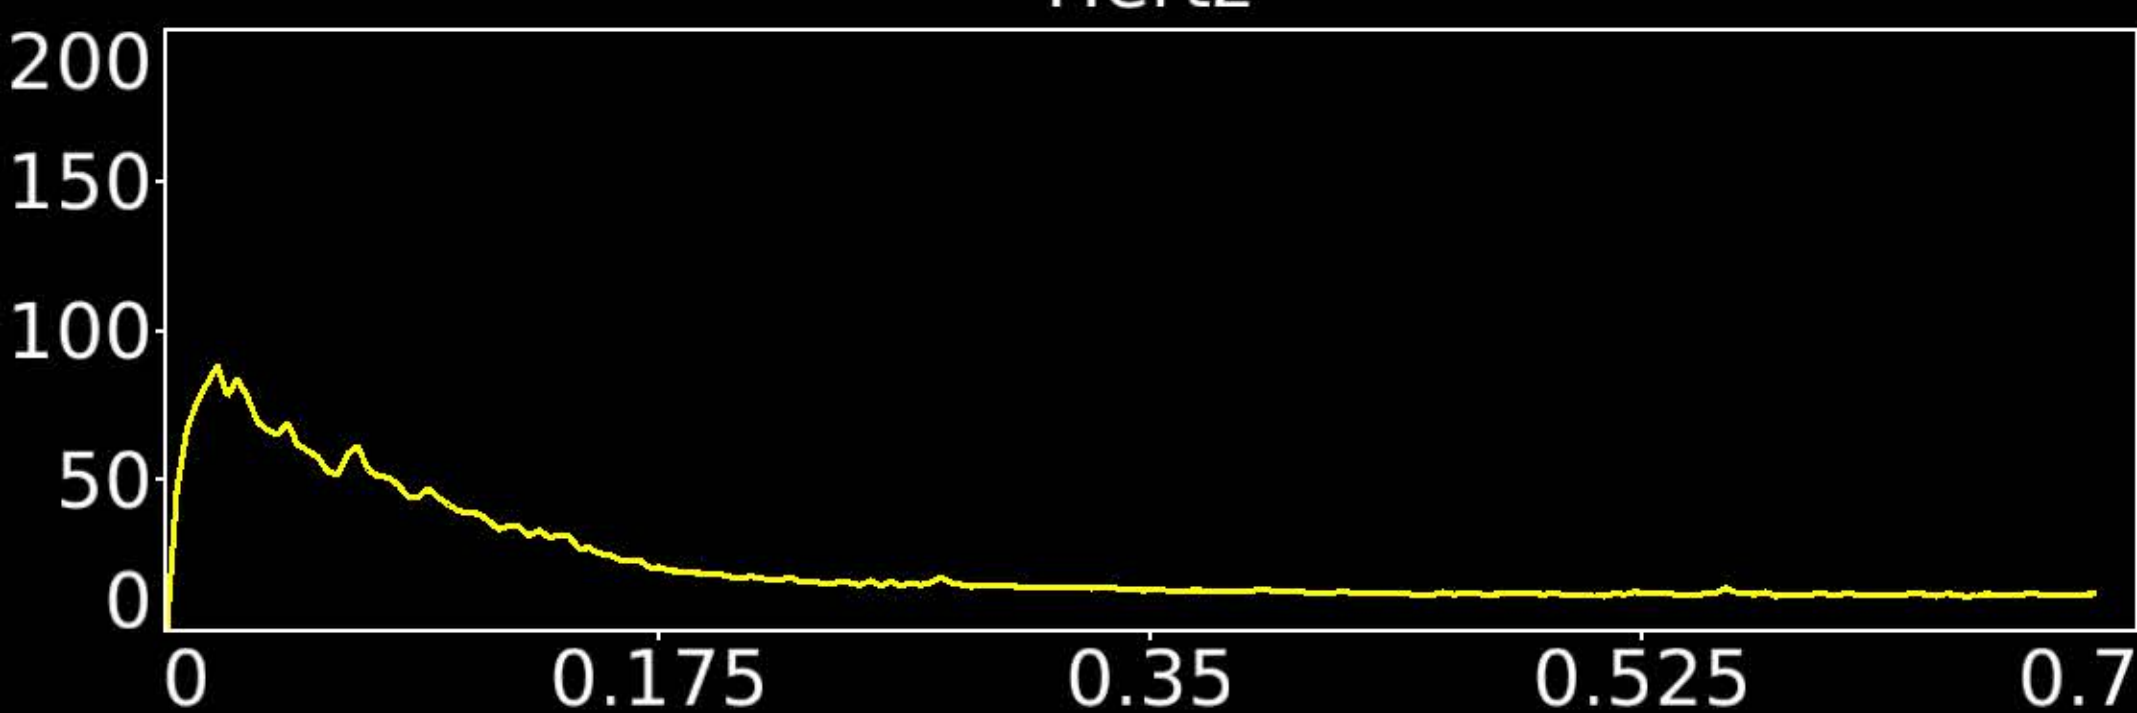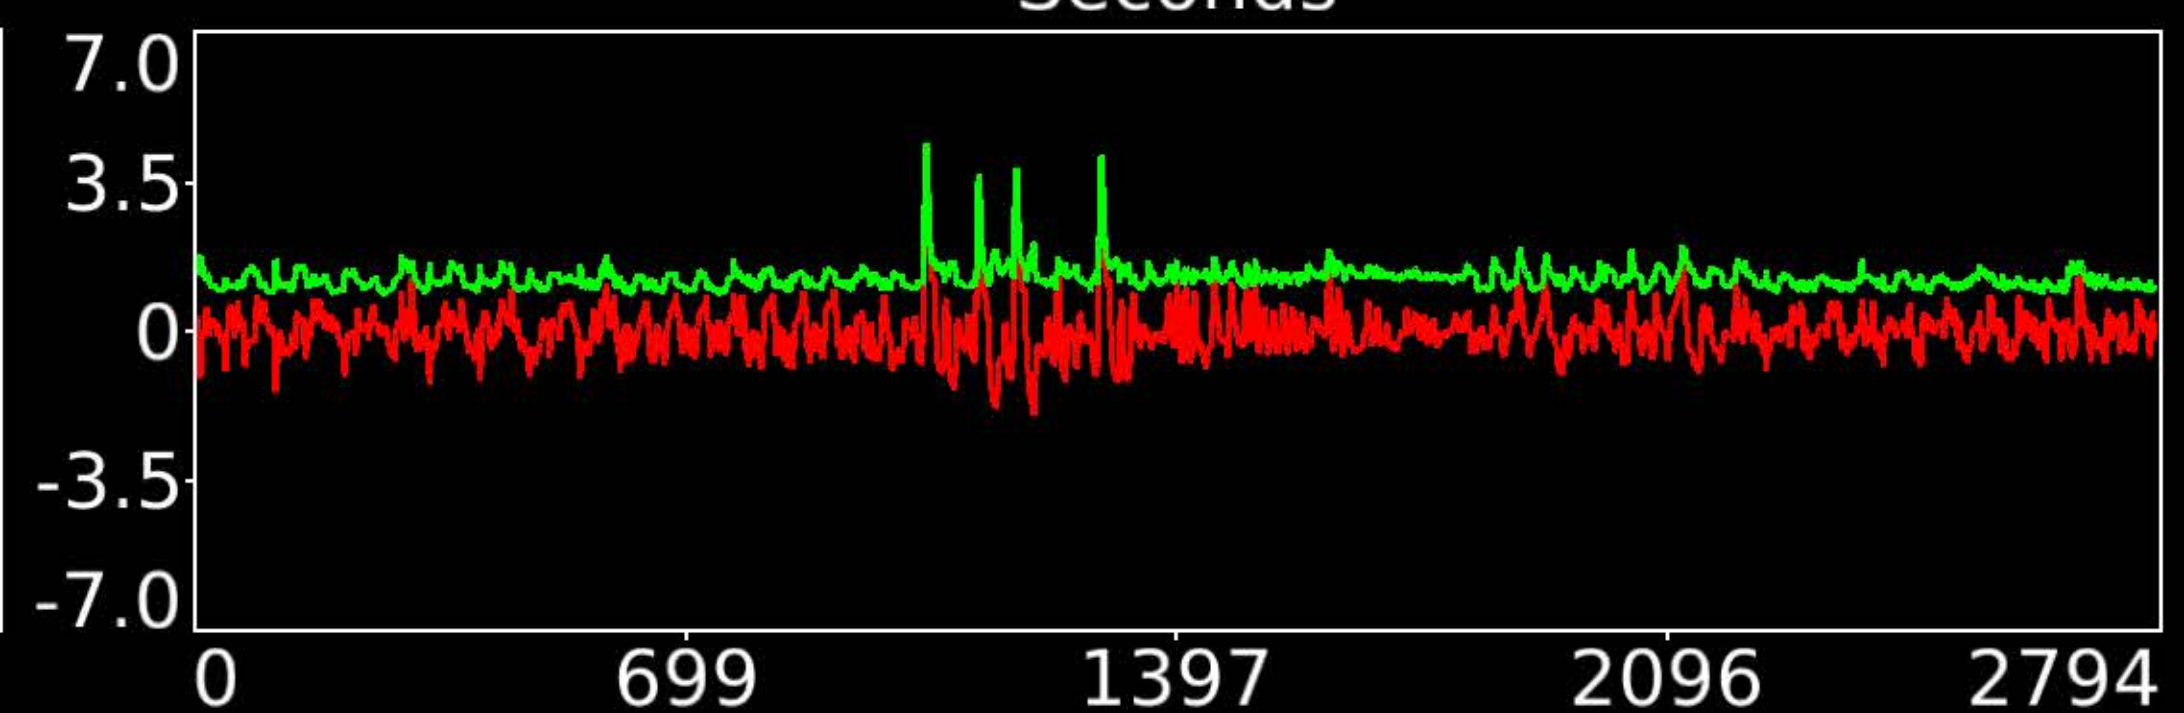

|                          |                            |                                |  |
|--------------------------|----------------------------|--------------------------------|--|
| Number & Class: 6 Signal |                            | Name: Right Hand Motor Network |  |
| RVT Correlated: No       | DVARS Dip Associated: Yes  | Cross-Subject Variable: Yes    |  |
| Single Subject: No       | % Variance Explained: 2.81 | Globality Index: 0.03          |  |
| Rest Component: 33       | Taskr Component: 7         | Task Modulated: No             |  |

Rationale: Spatial map includes positive and negative patches that respect known somatotopic sensori-motor organization (Right Hand)



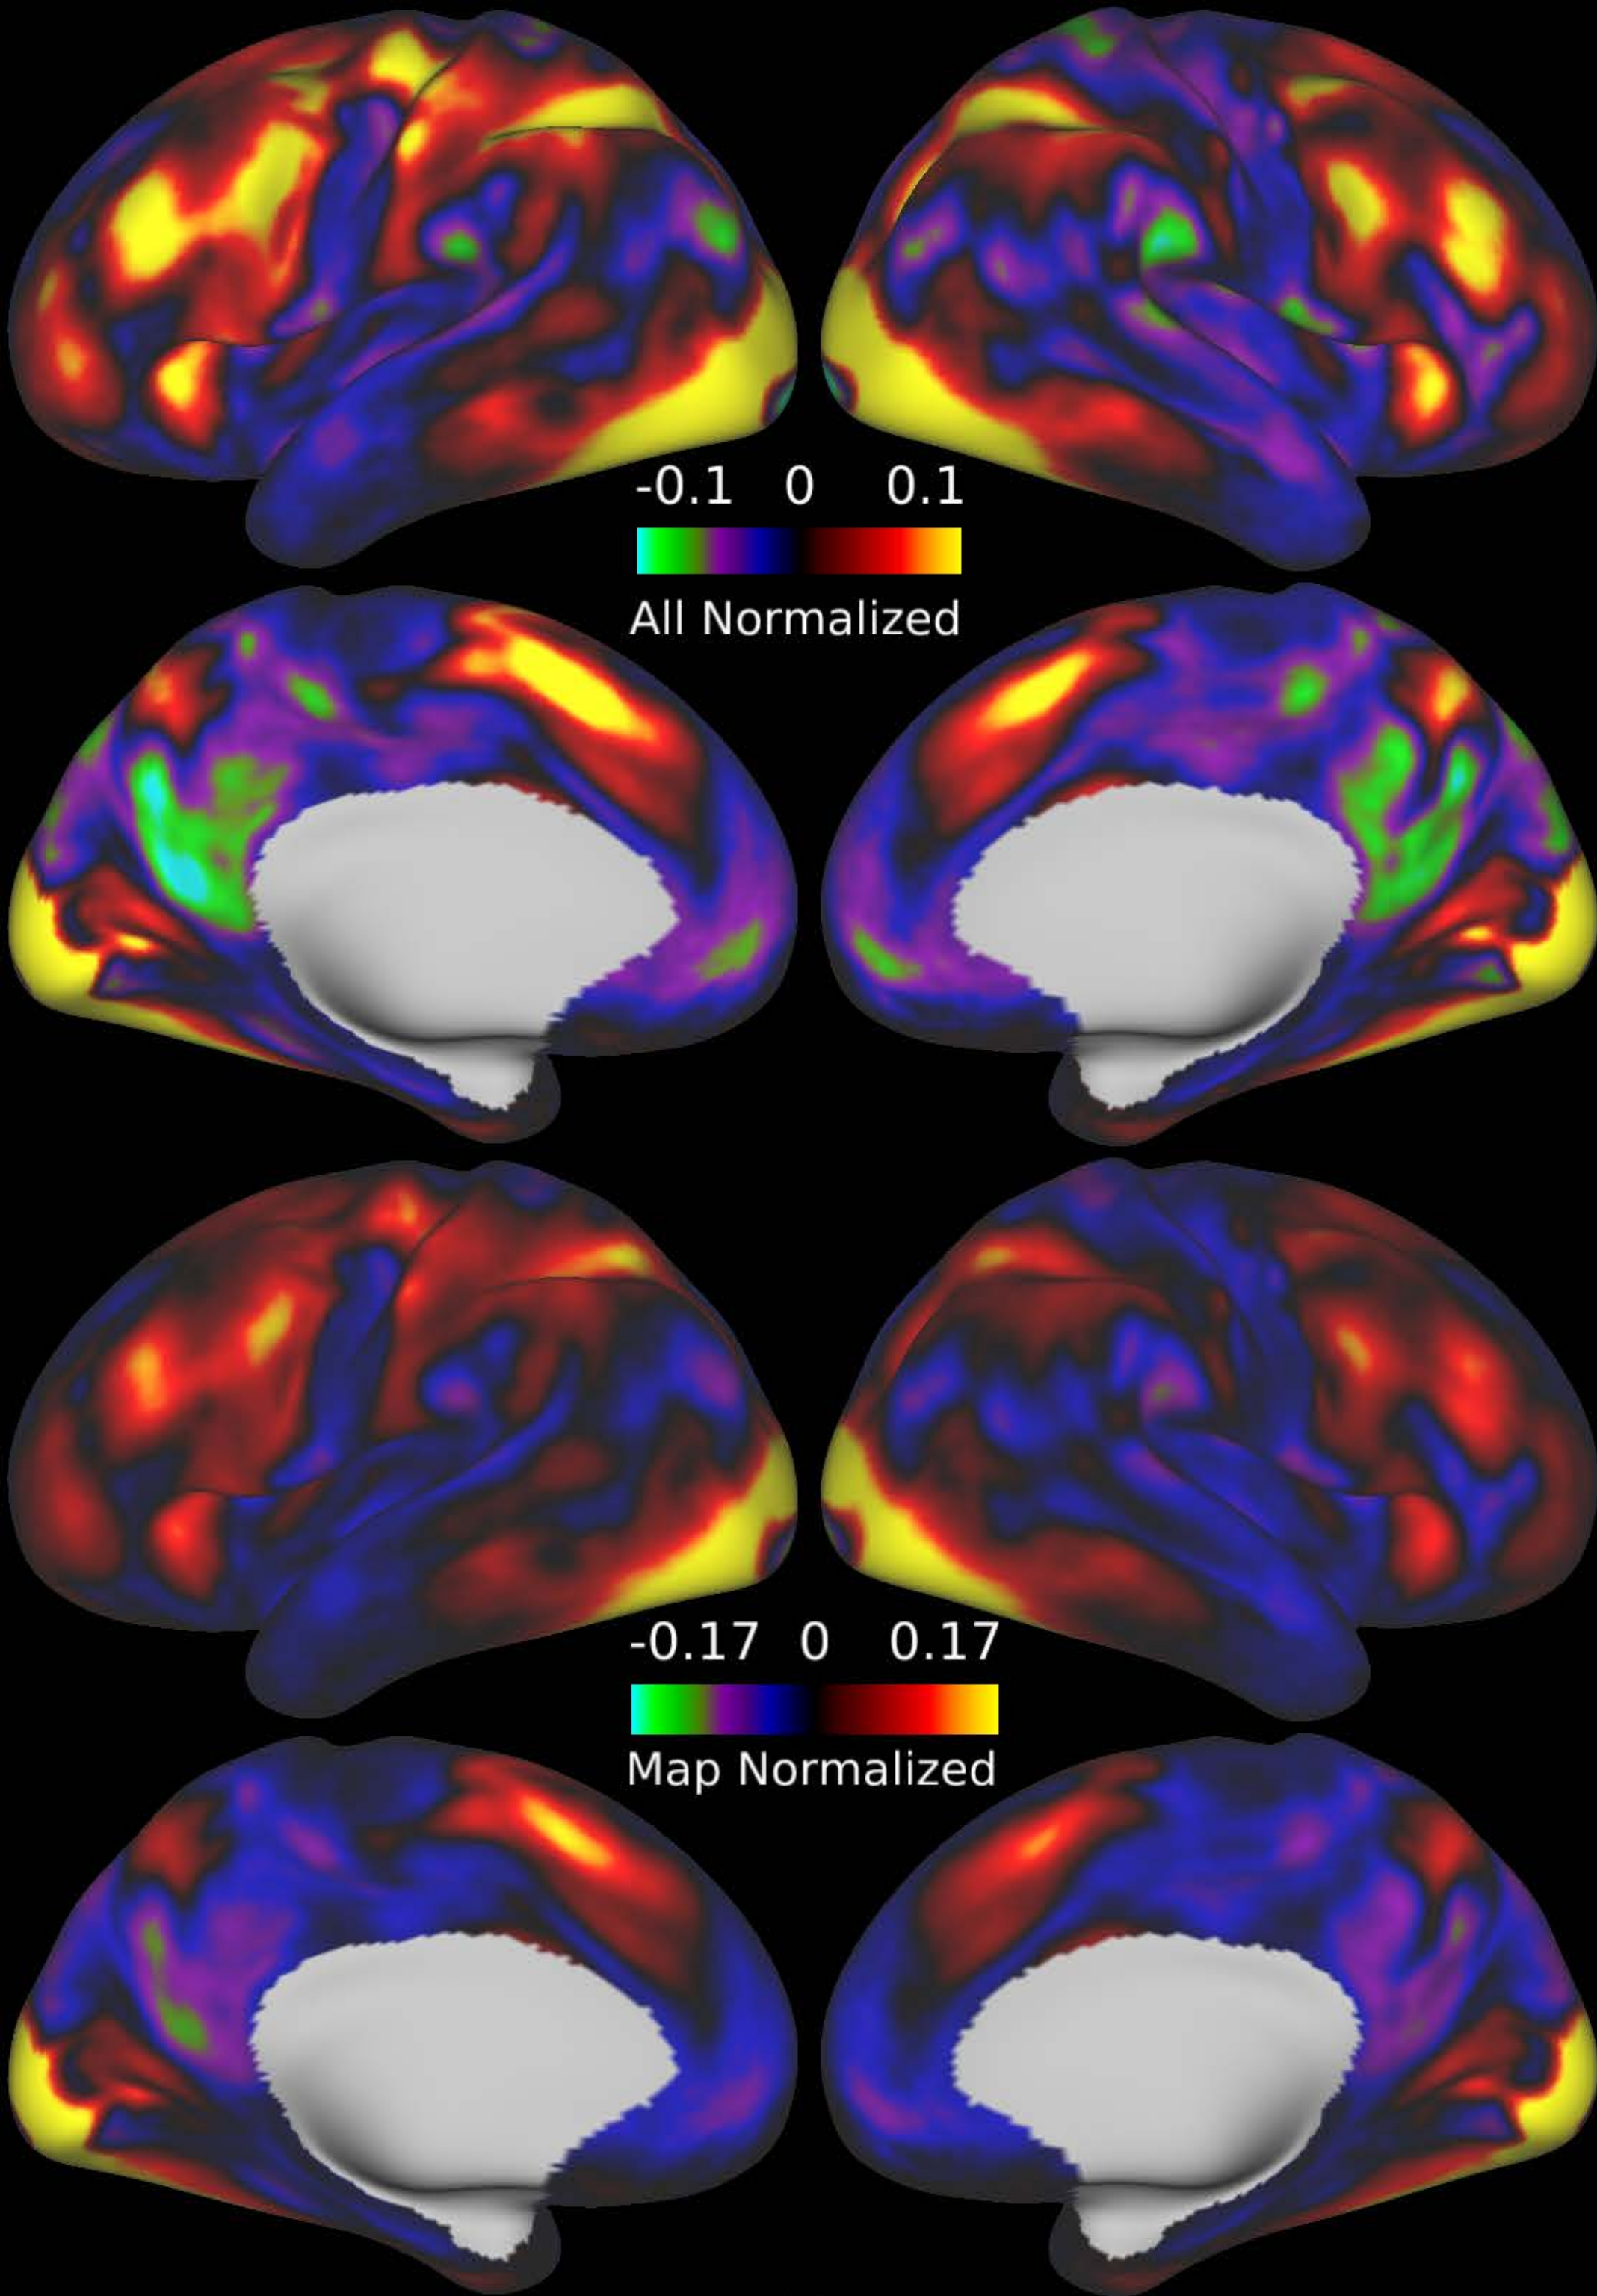

Hertz

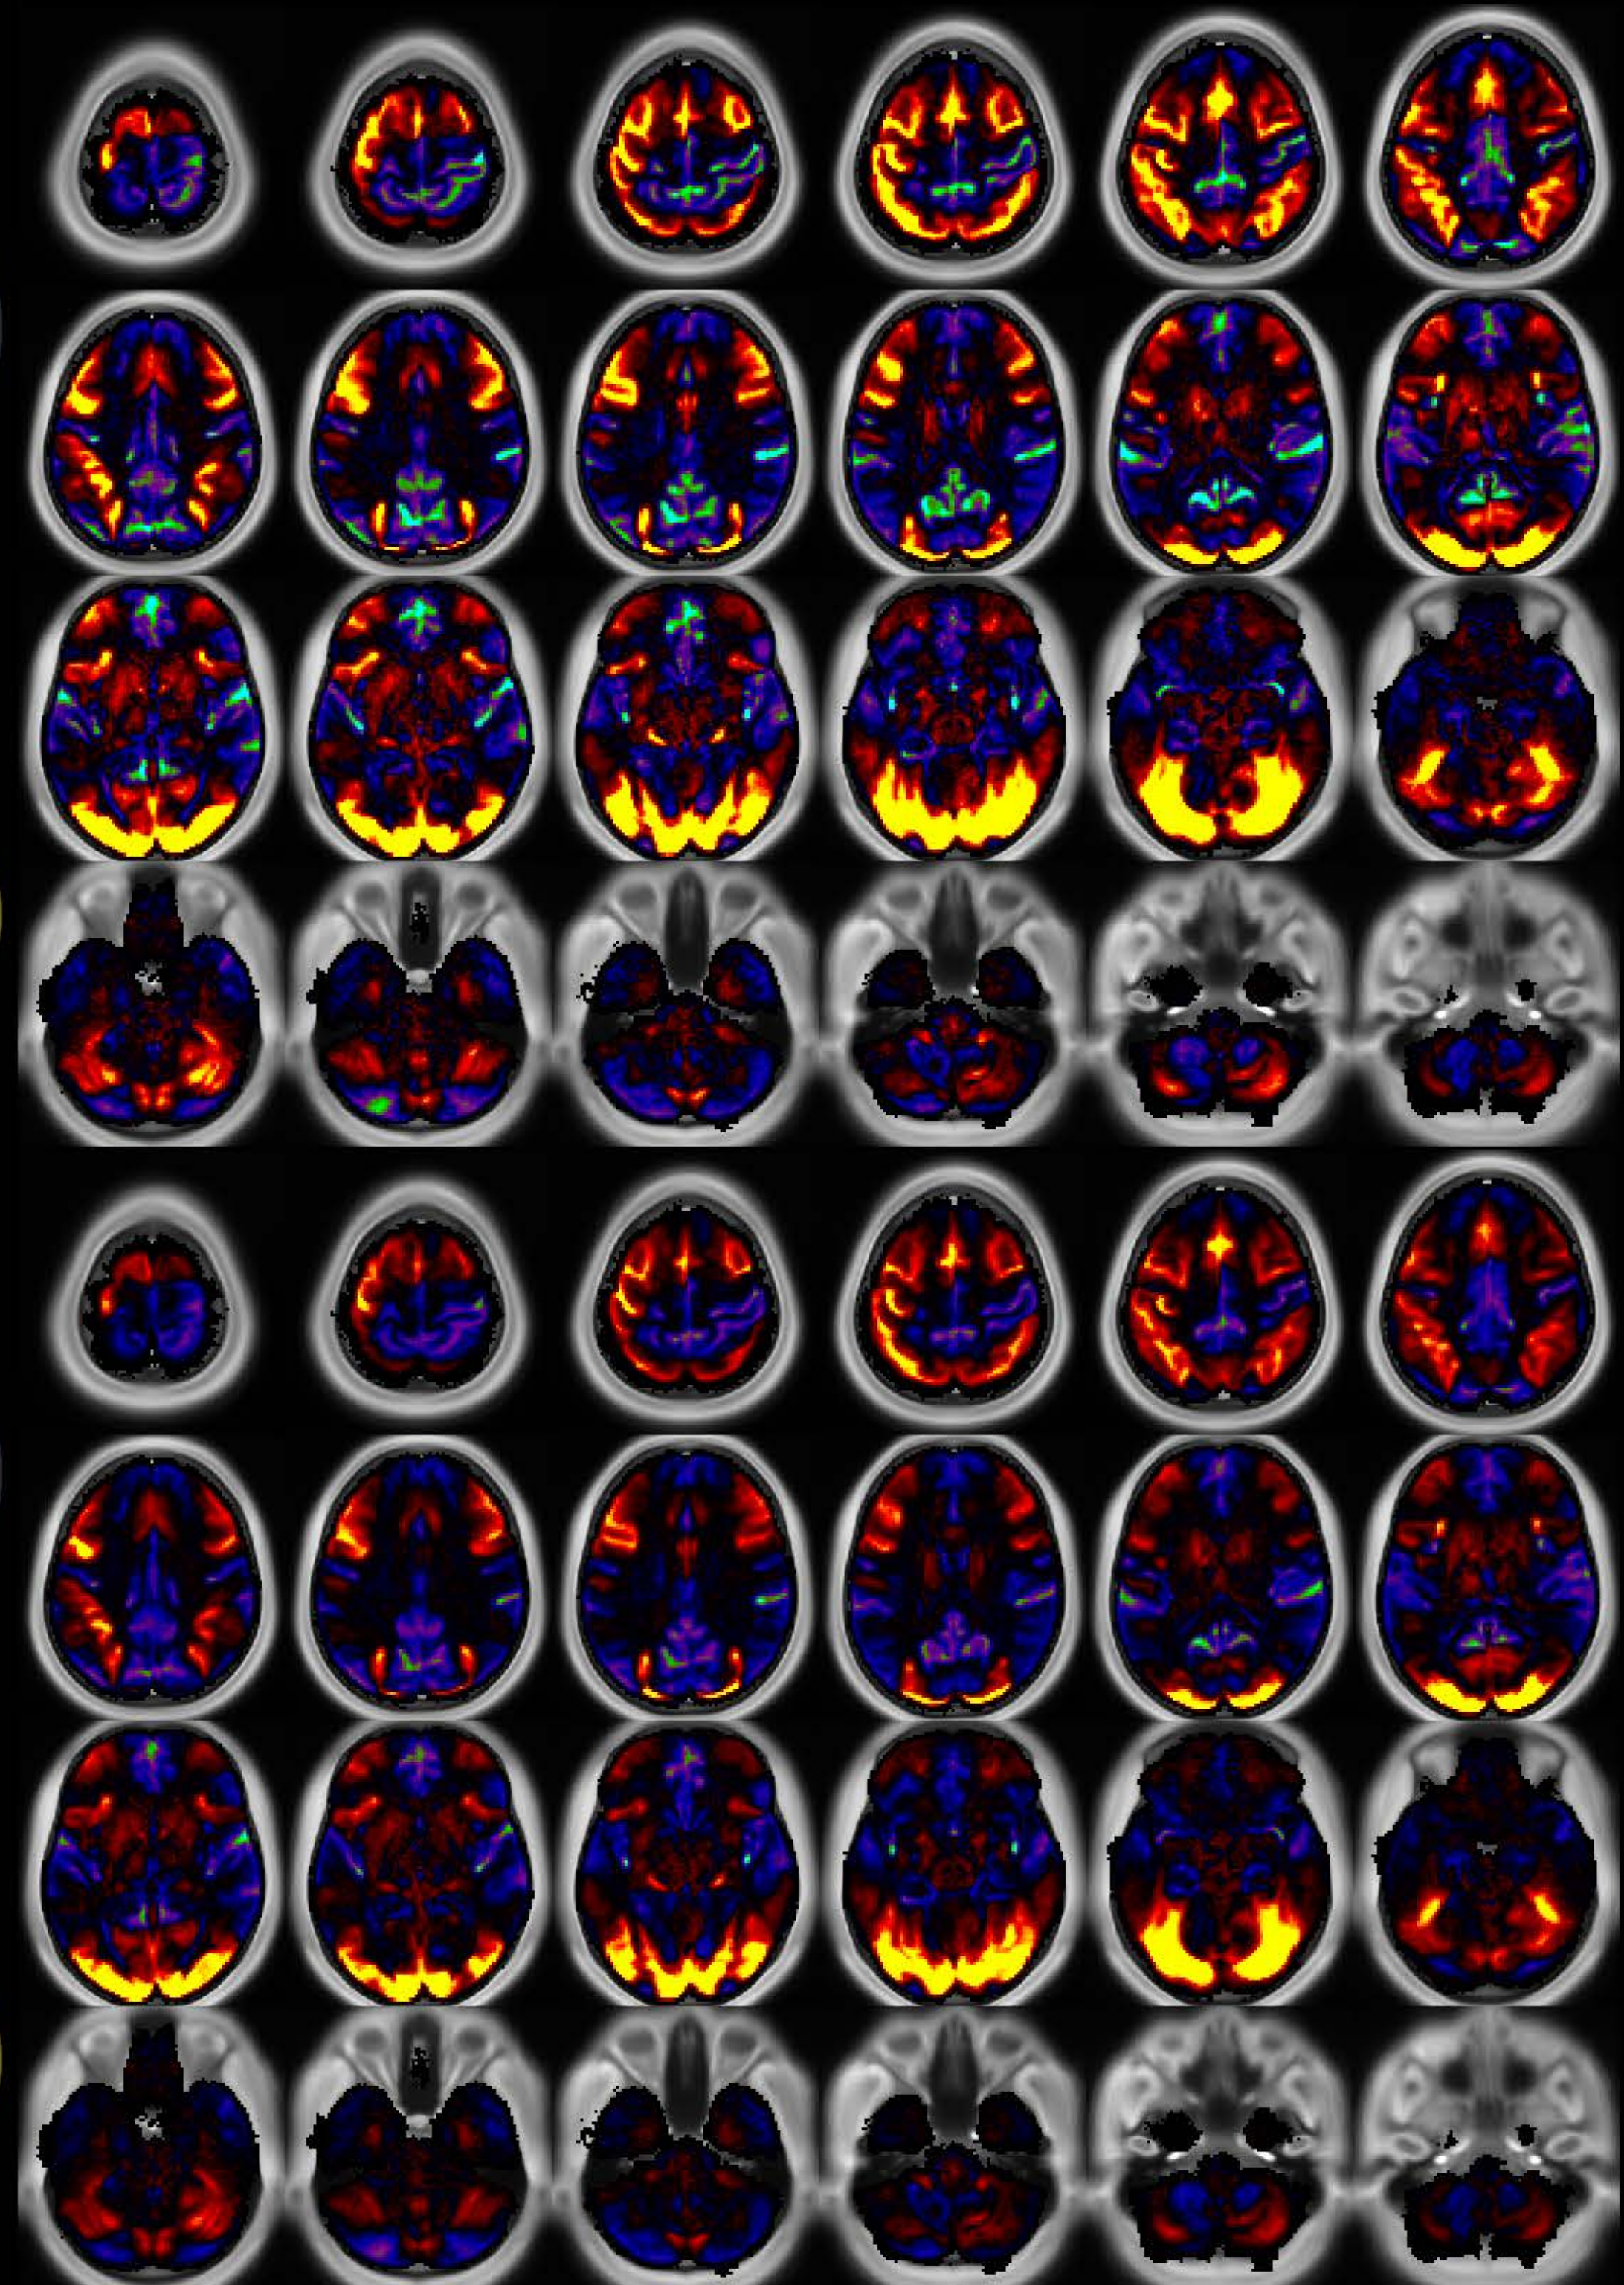

Seconds

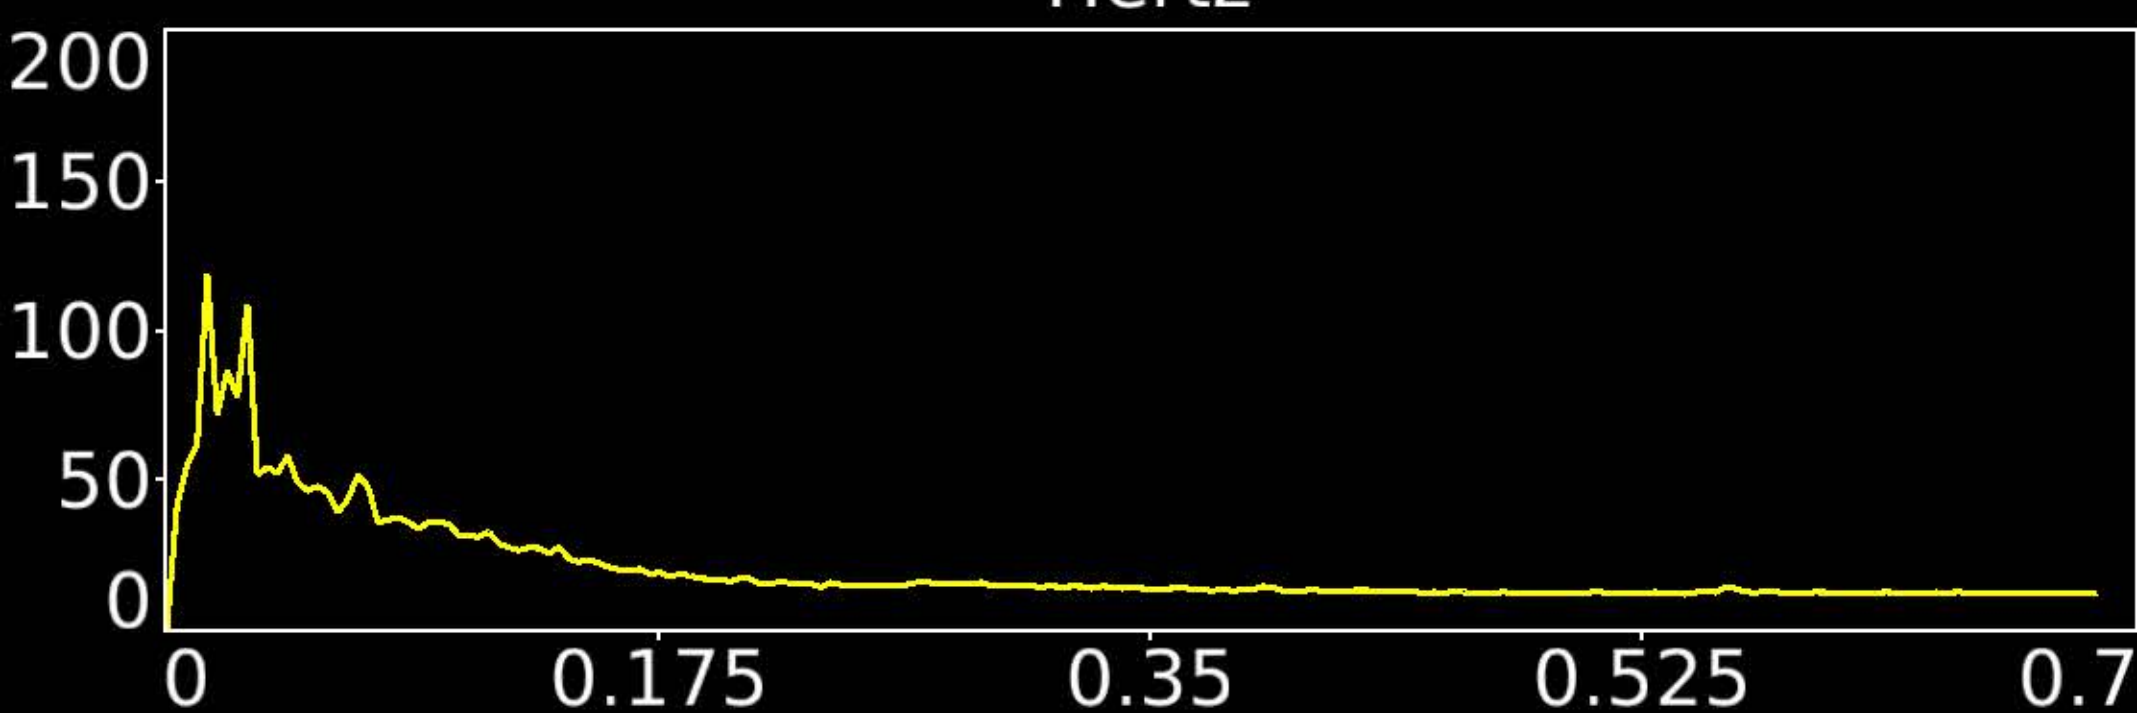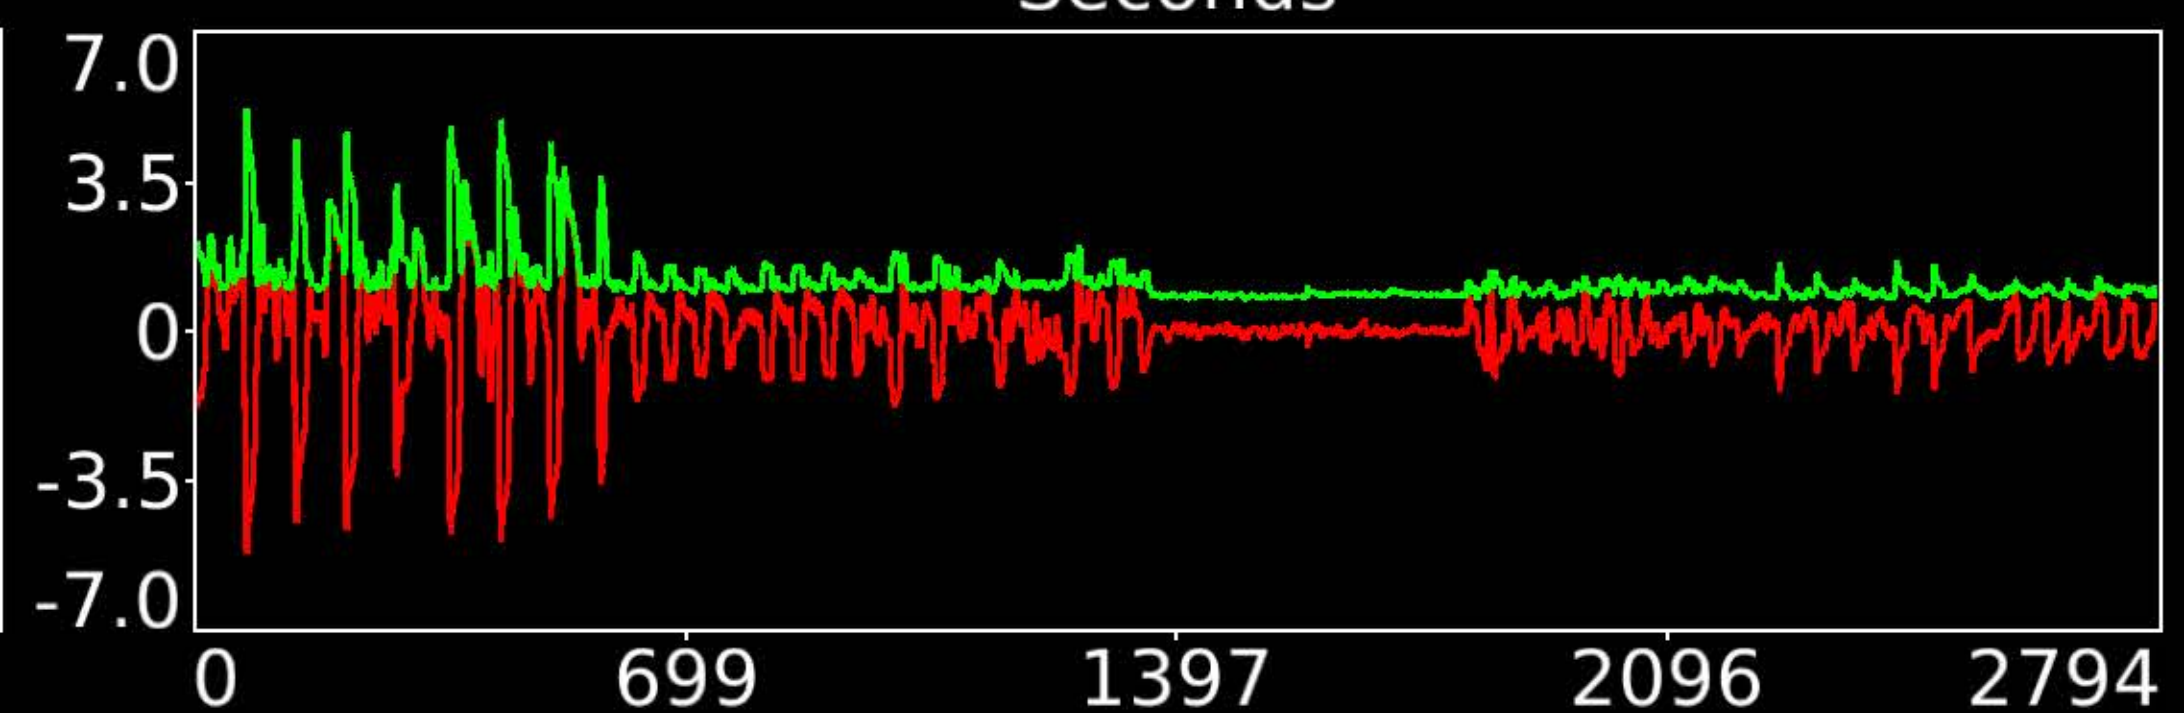

|                                                                                                               |                            |                                |  |
|---------------------------------------------------------------------------------------------------------------|----------------------------|--------------------------------|--|
| Number & Class: 7 Signal                                                                                      |                            | Name: Working Memory Task Main |  |
| RVT Correlated: No                                                                                            | DVARS Dip Associated: No   | Cross-Subject Variable: No     |  |
| Single Subject: No                                                                                            | % Variance Explained: 2.74 | Globality Index: 0.1           |  |
| Rest Component: No                                                                                            | Taskr Component: 20+29     | Task Modulated: Working Memory |  |
| Rationale: Spatial map includes positive and negative patches that are correlated with a specific task design |                            |                                |  |



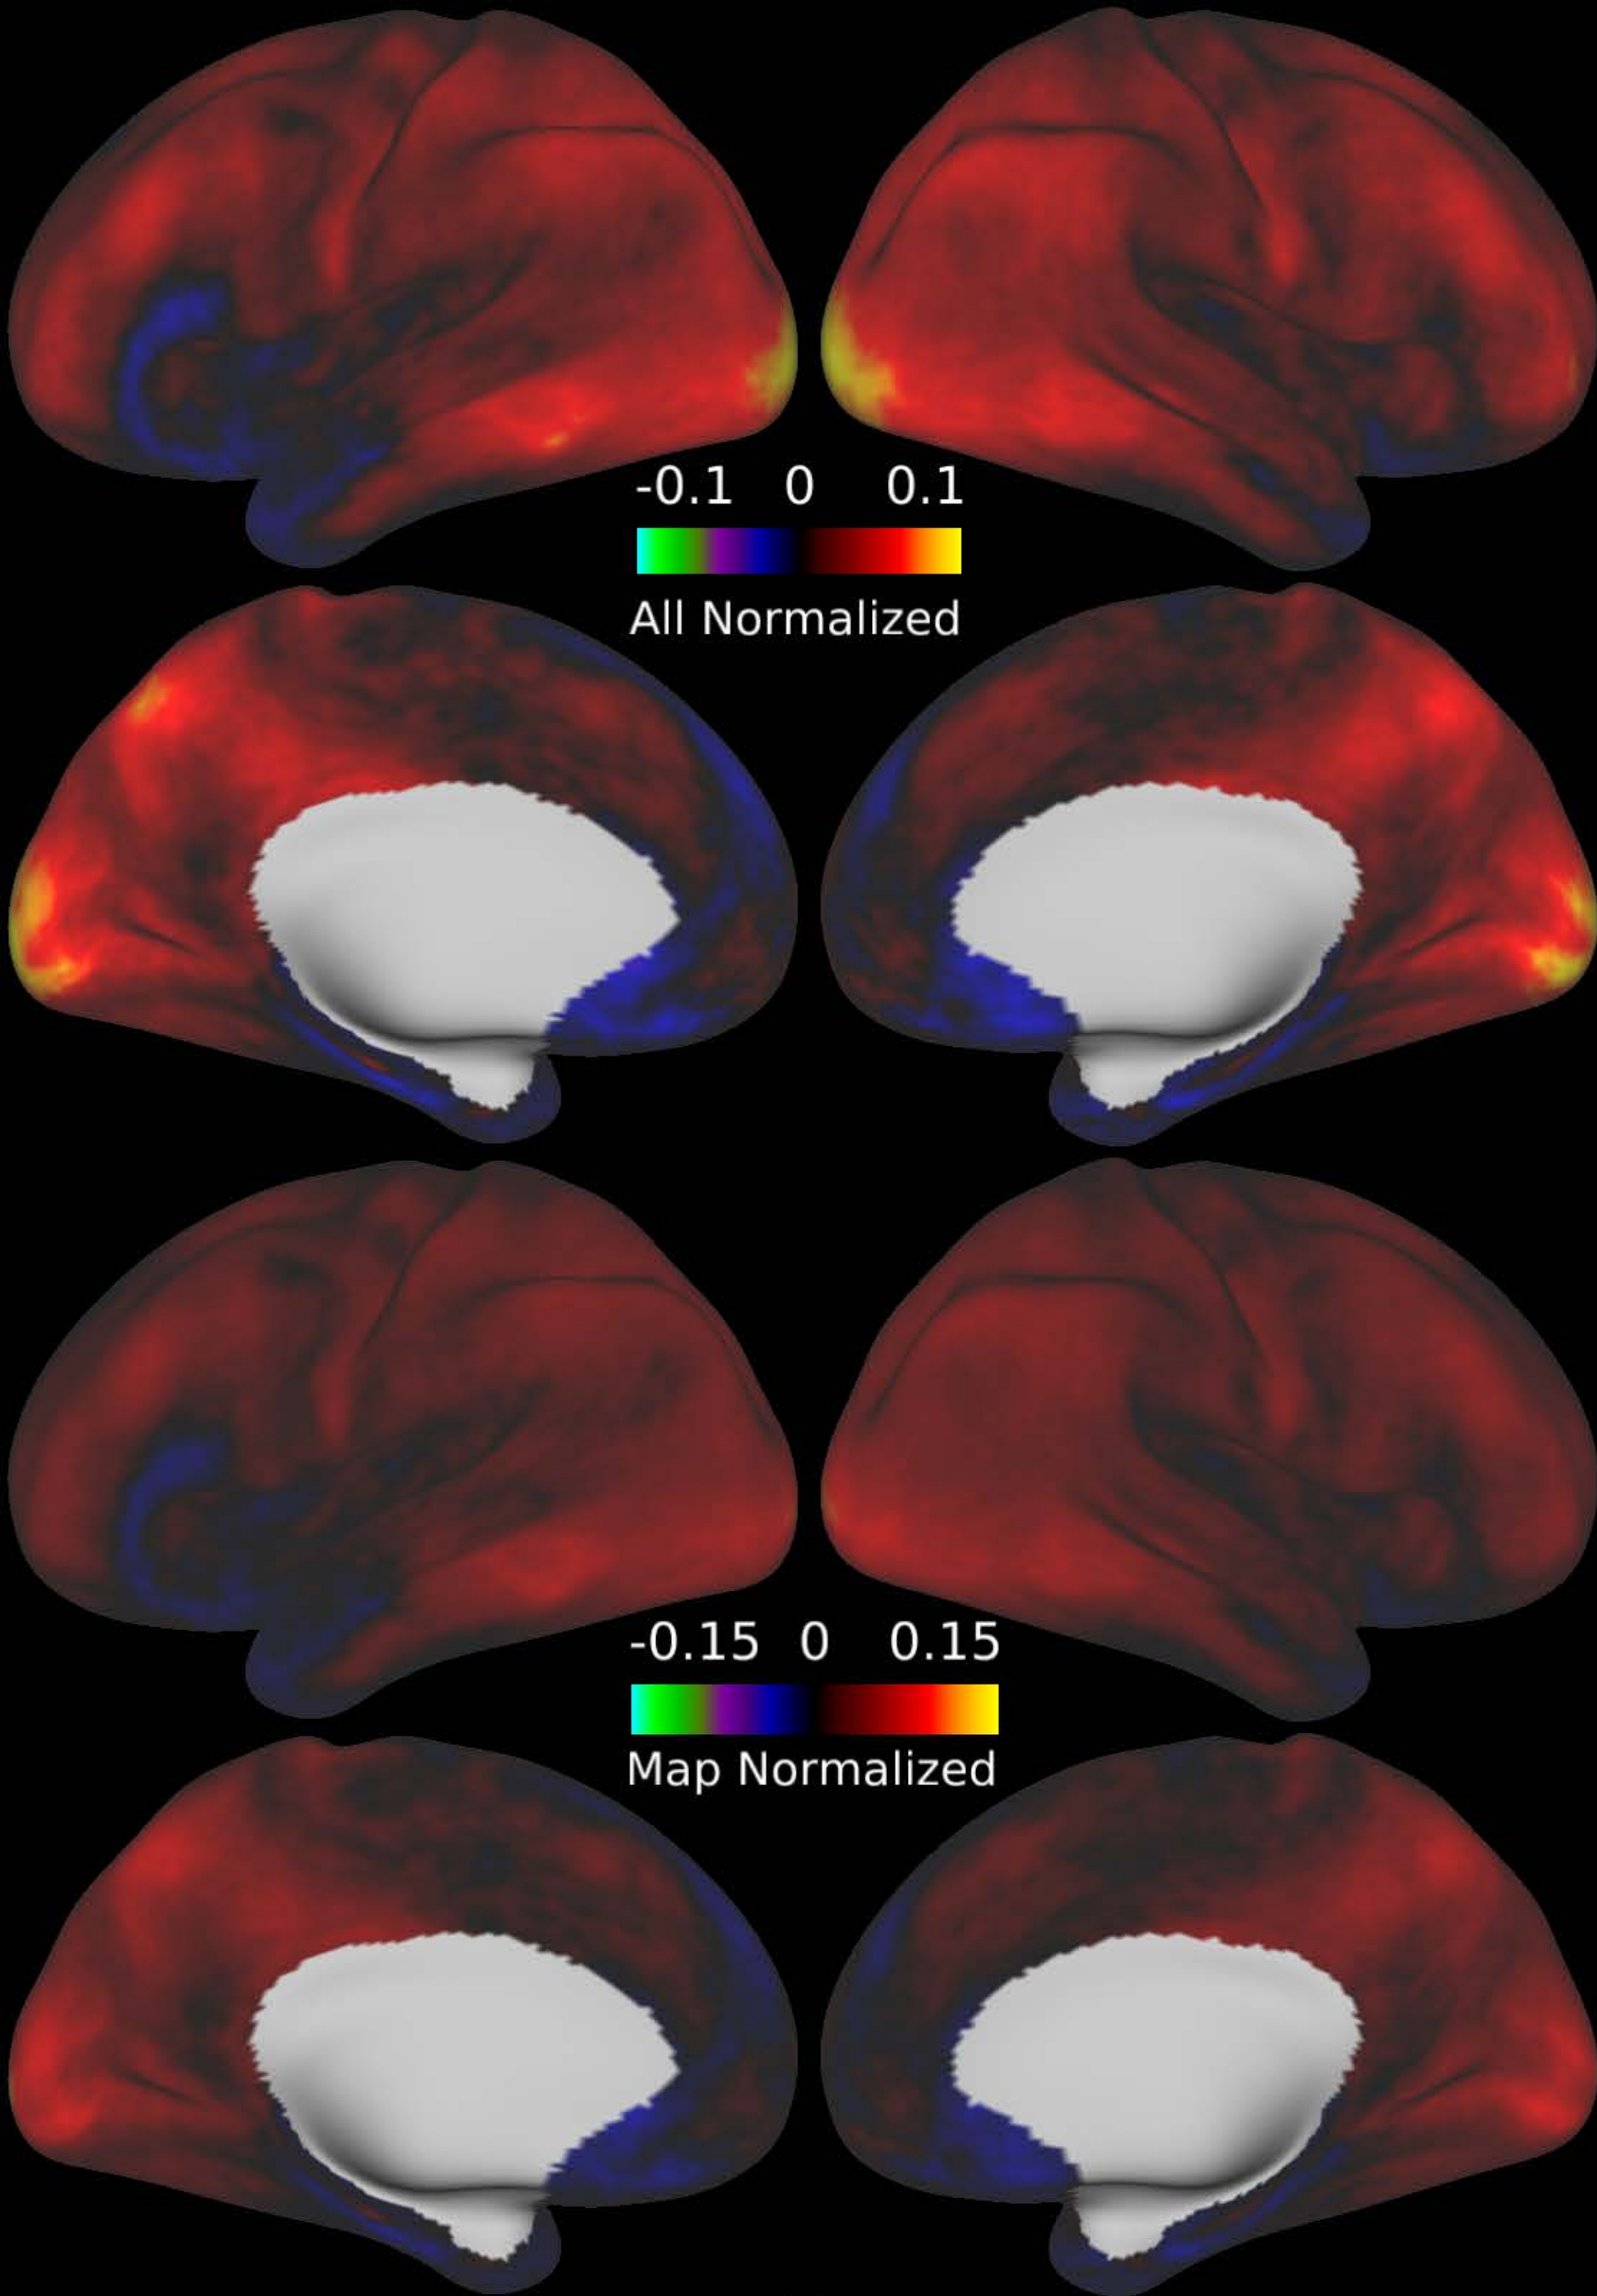

Hertz

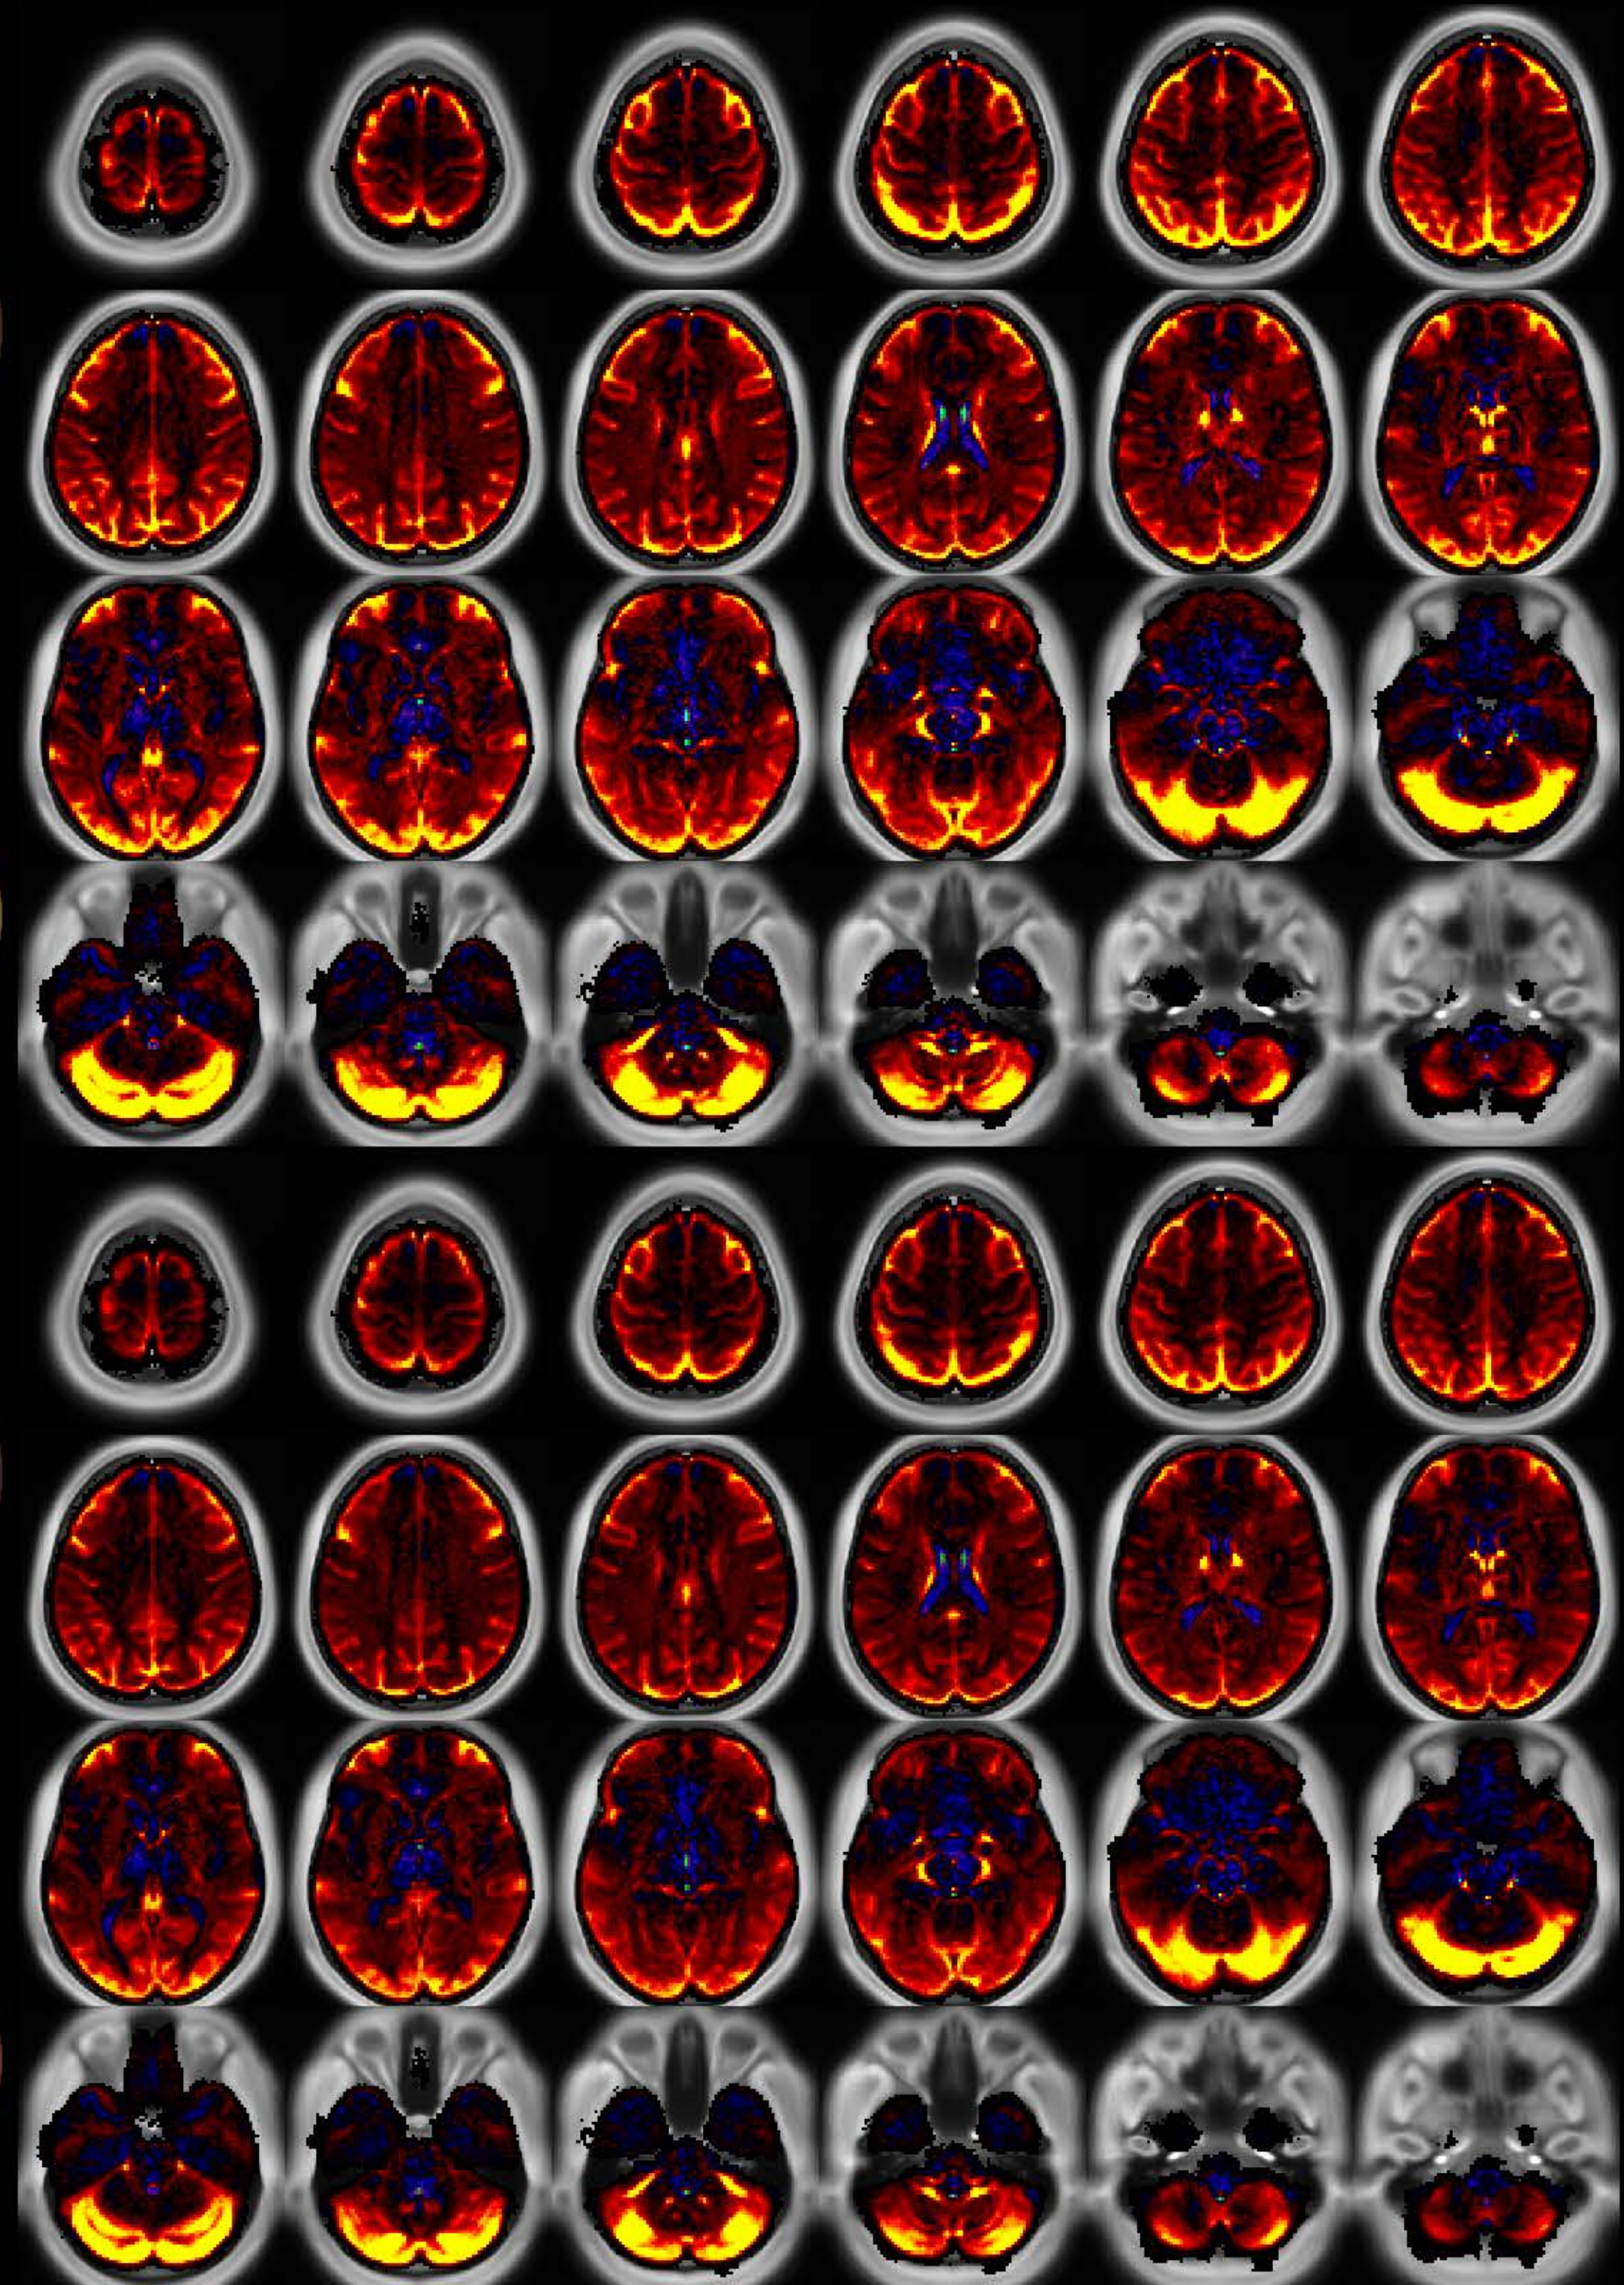

Seconds

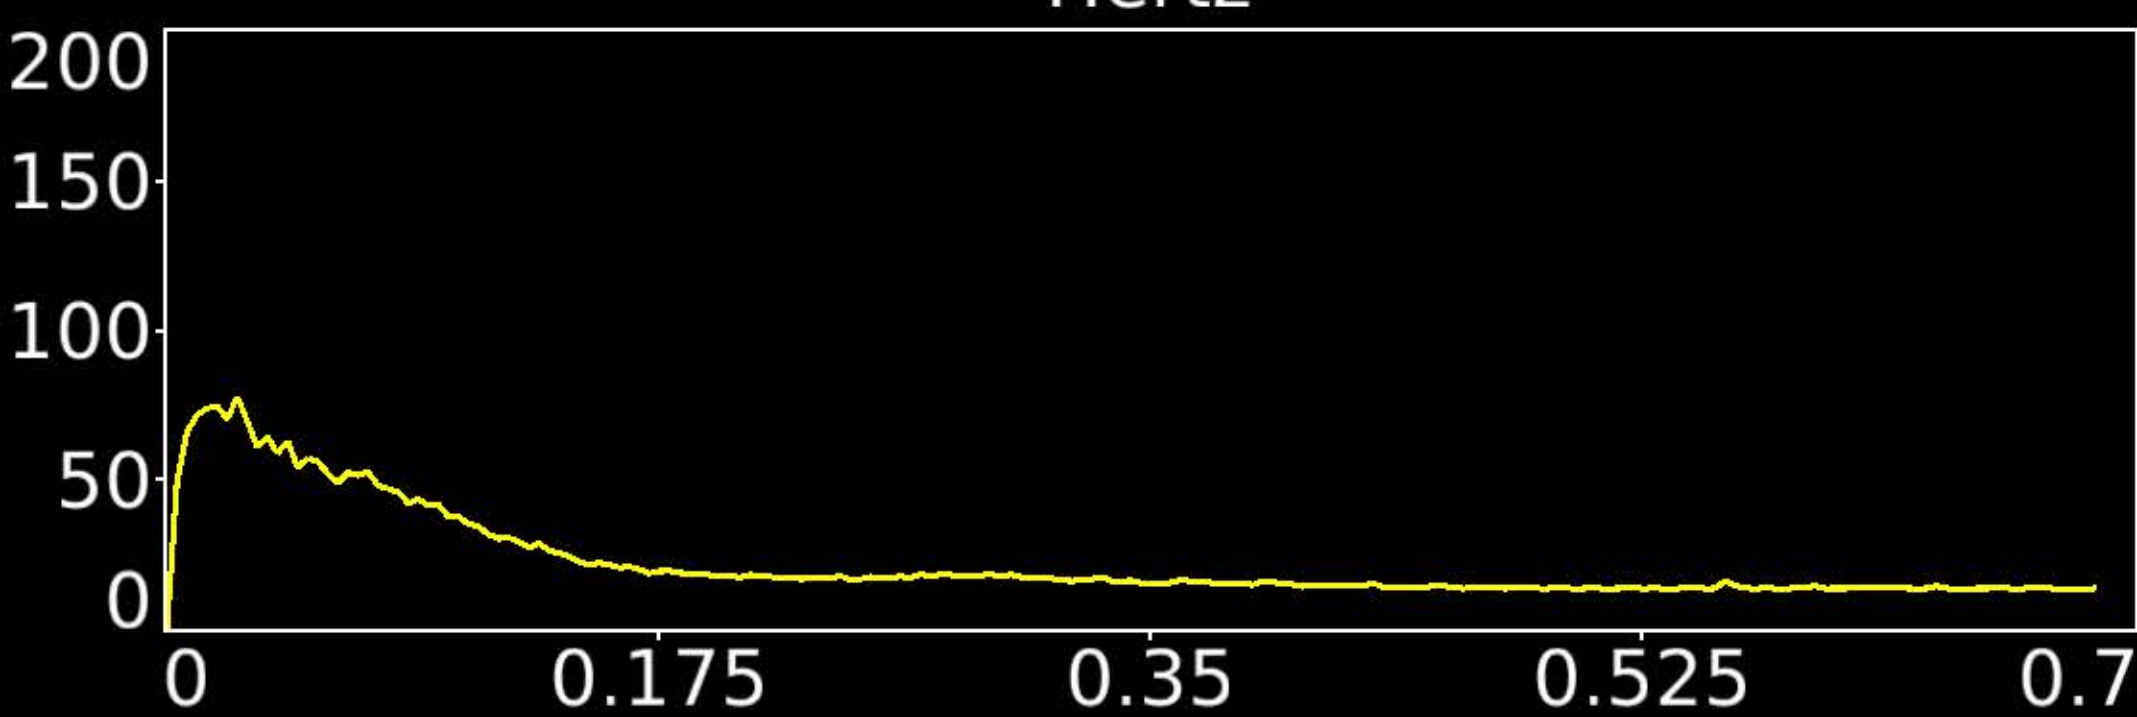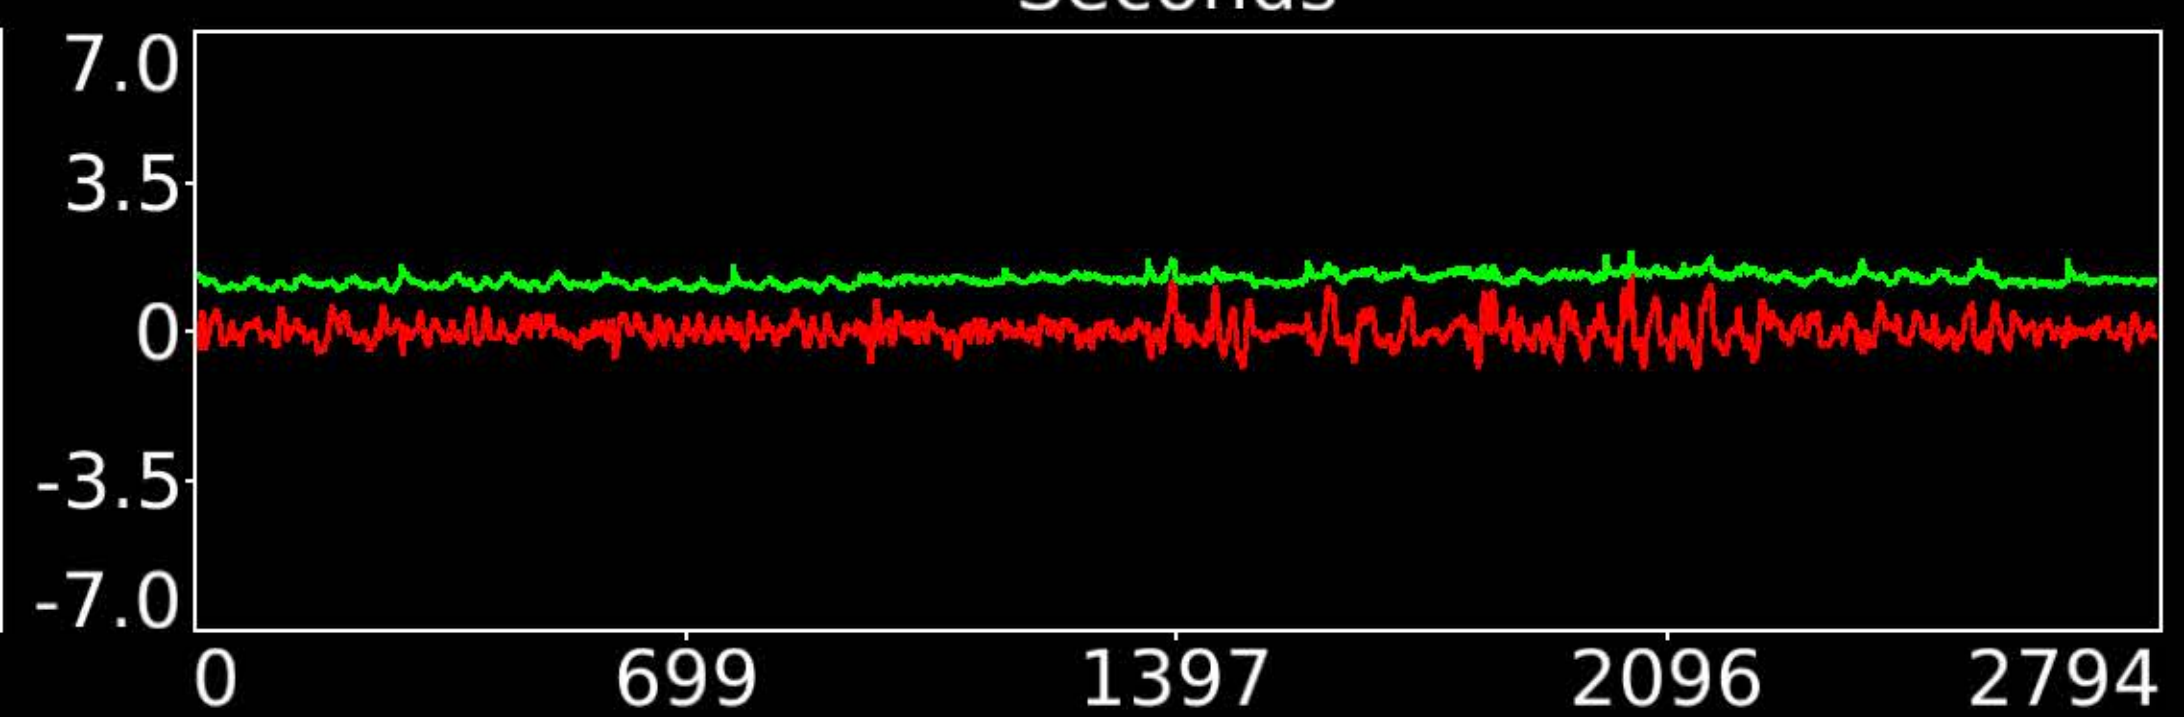

Number & Class: 8 Noise

Name: Veins + WM + Cerebellum

RVT Correlated: No

DVARS Dip Associated: Yes

Cross-Subject Variable: Yes

Single Subject: No

% Variance Explained: 2.5

Globality Index: 2.28

Rest Component: 19+28

Taskr Component: 5

Task Modulated: No

Rationale: Spatial map contains substantial white matter and venous signal



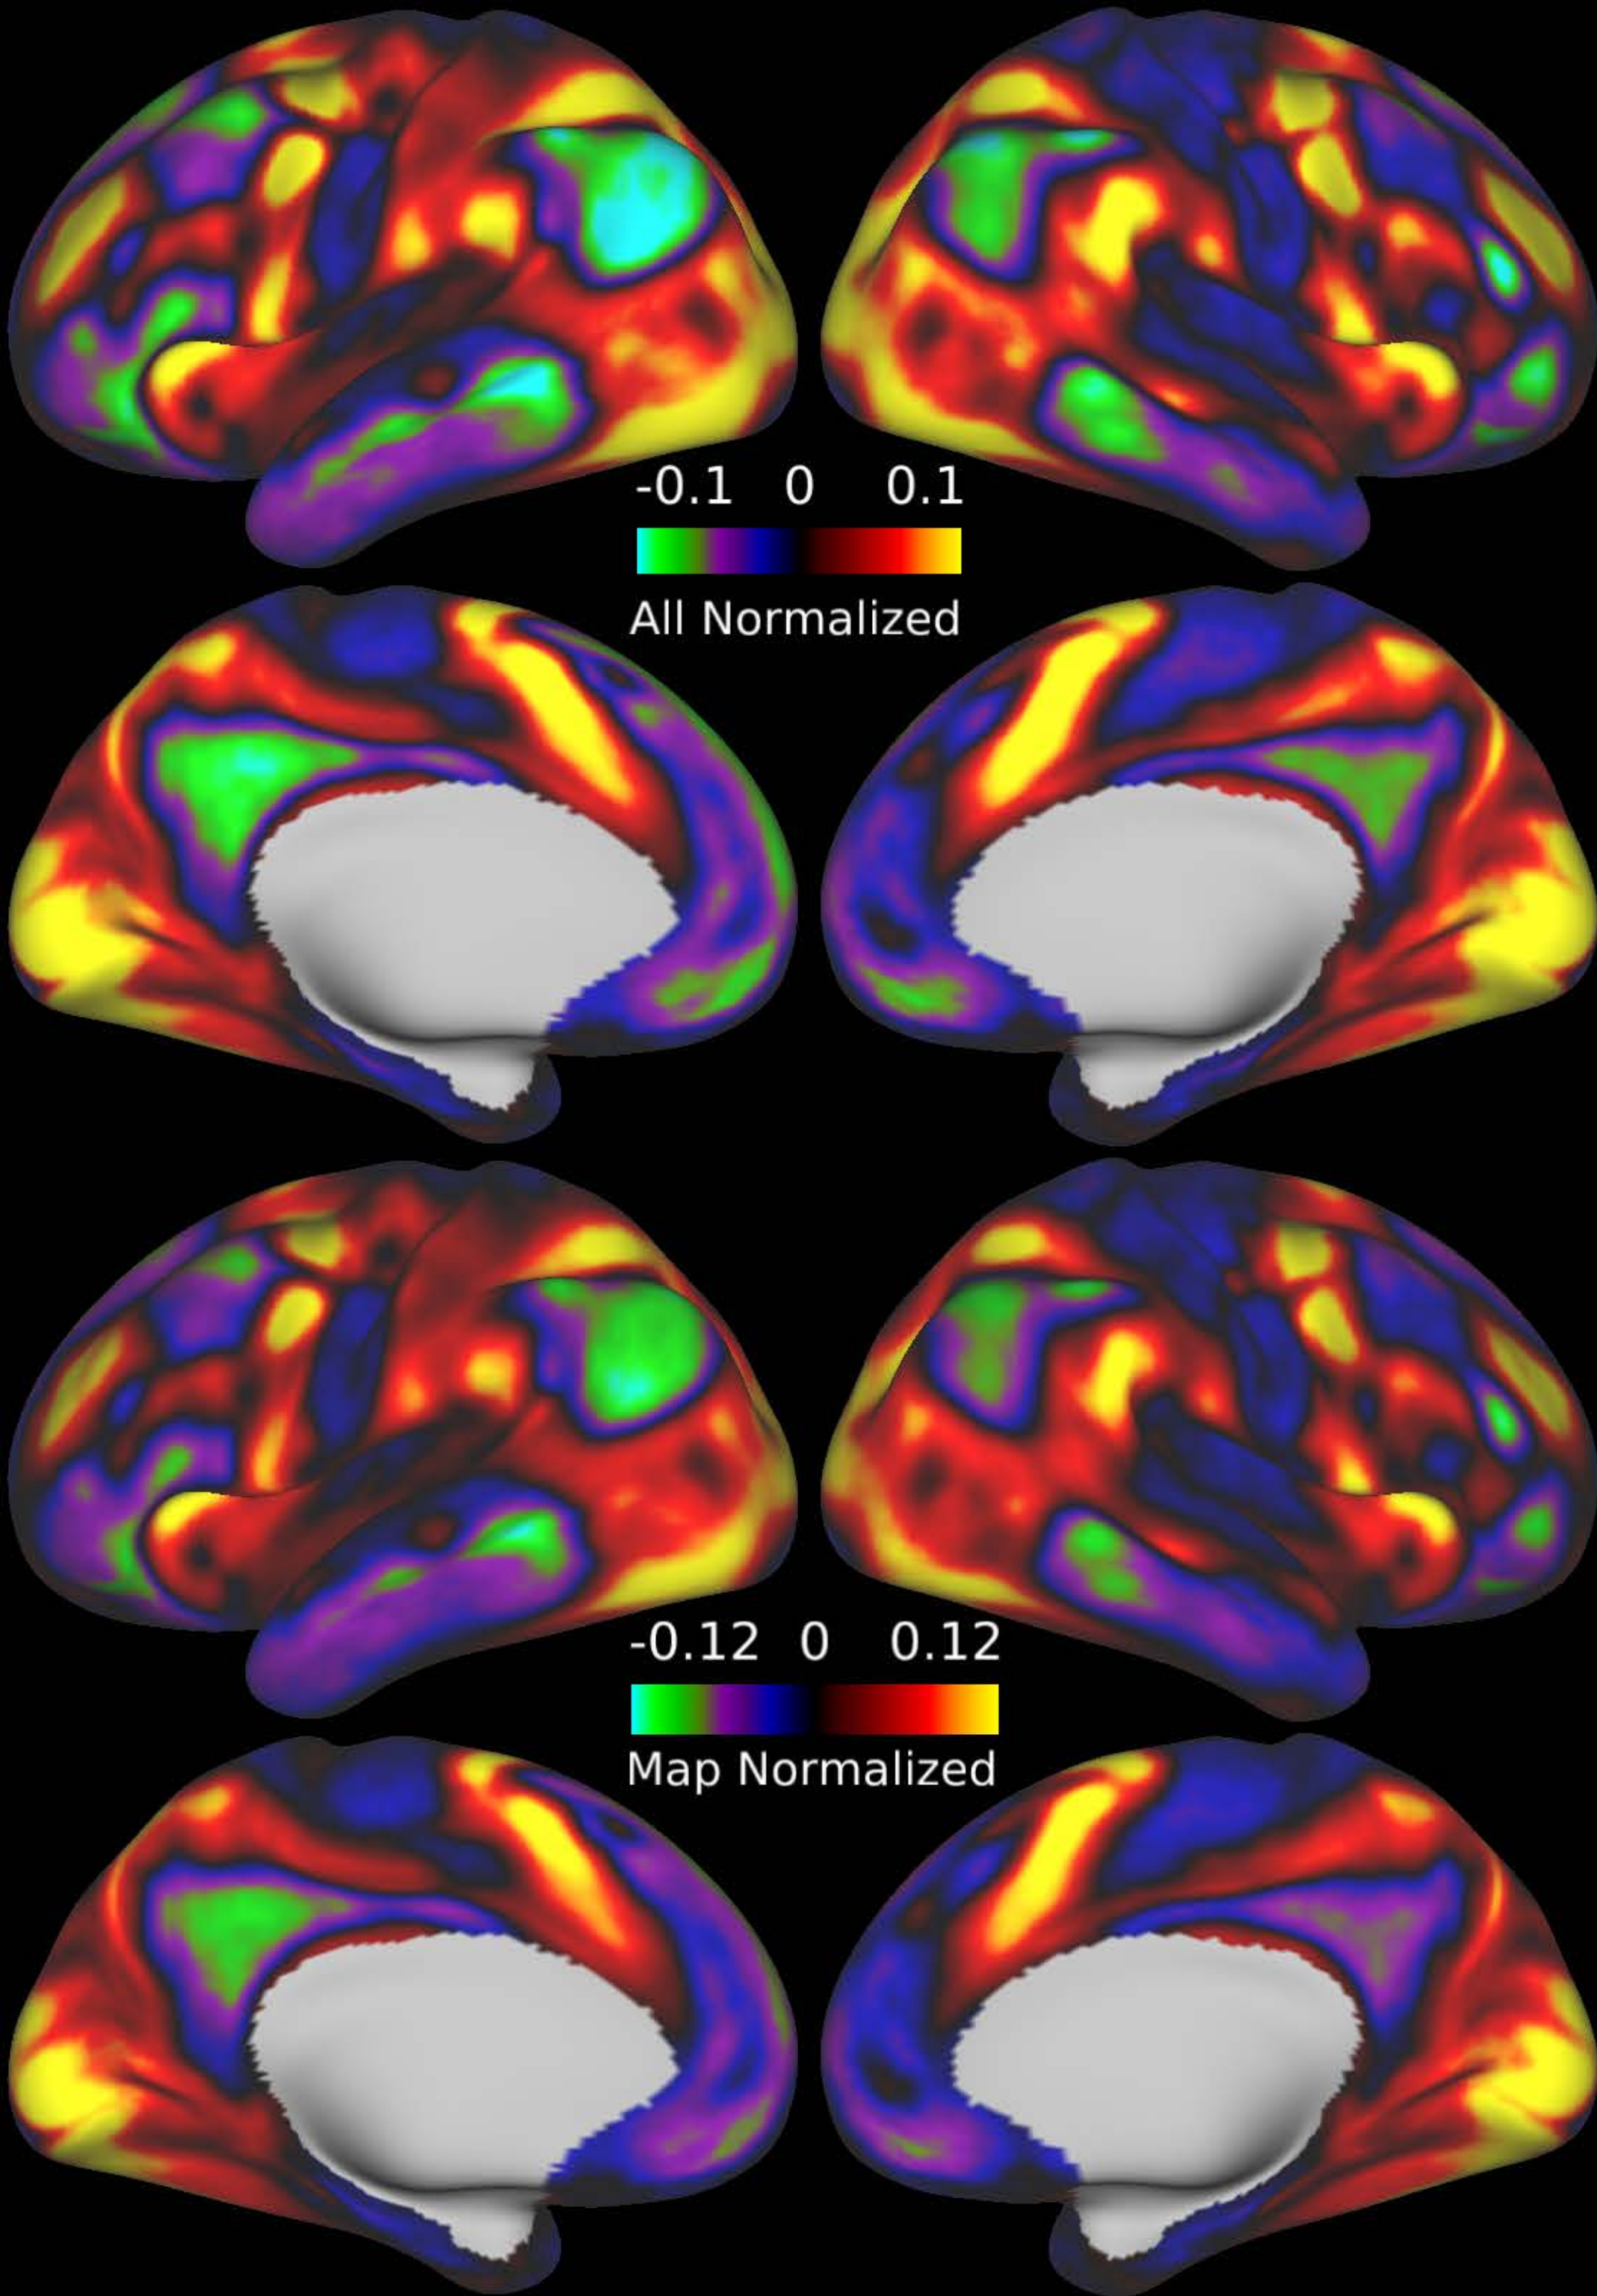

Hertz

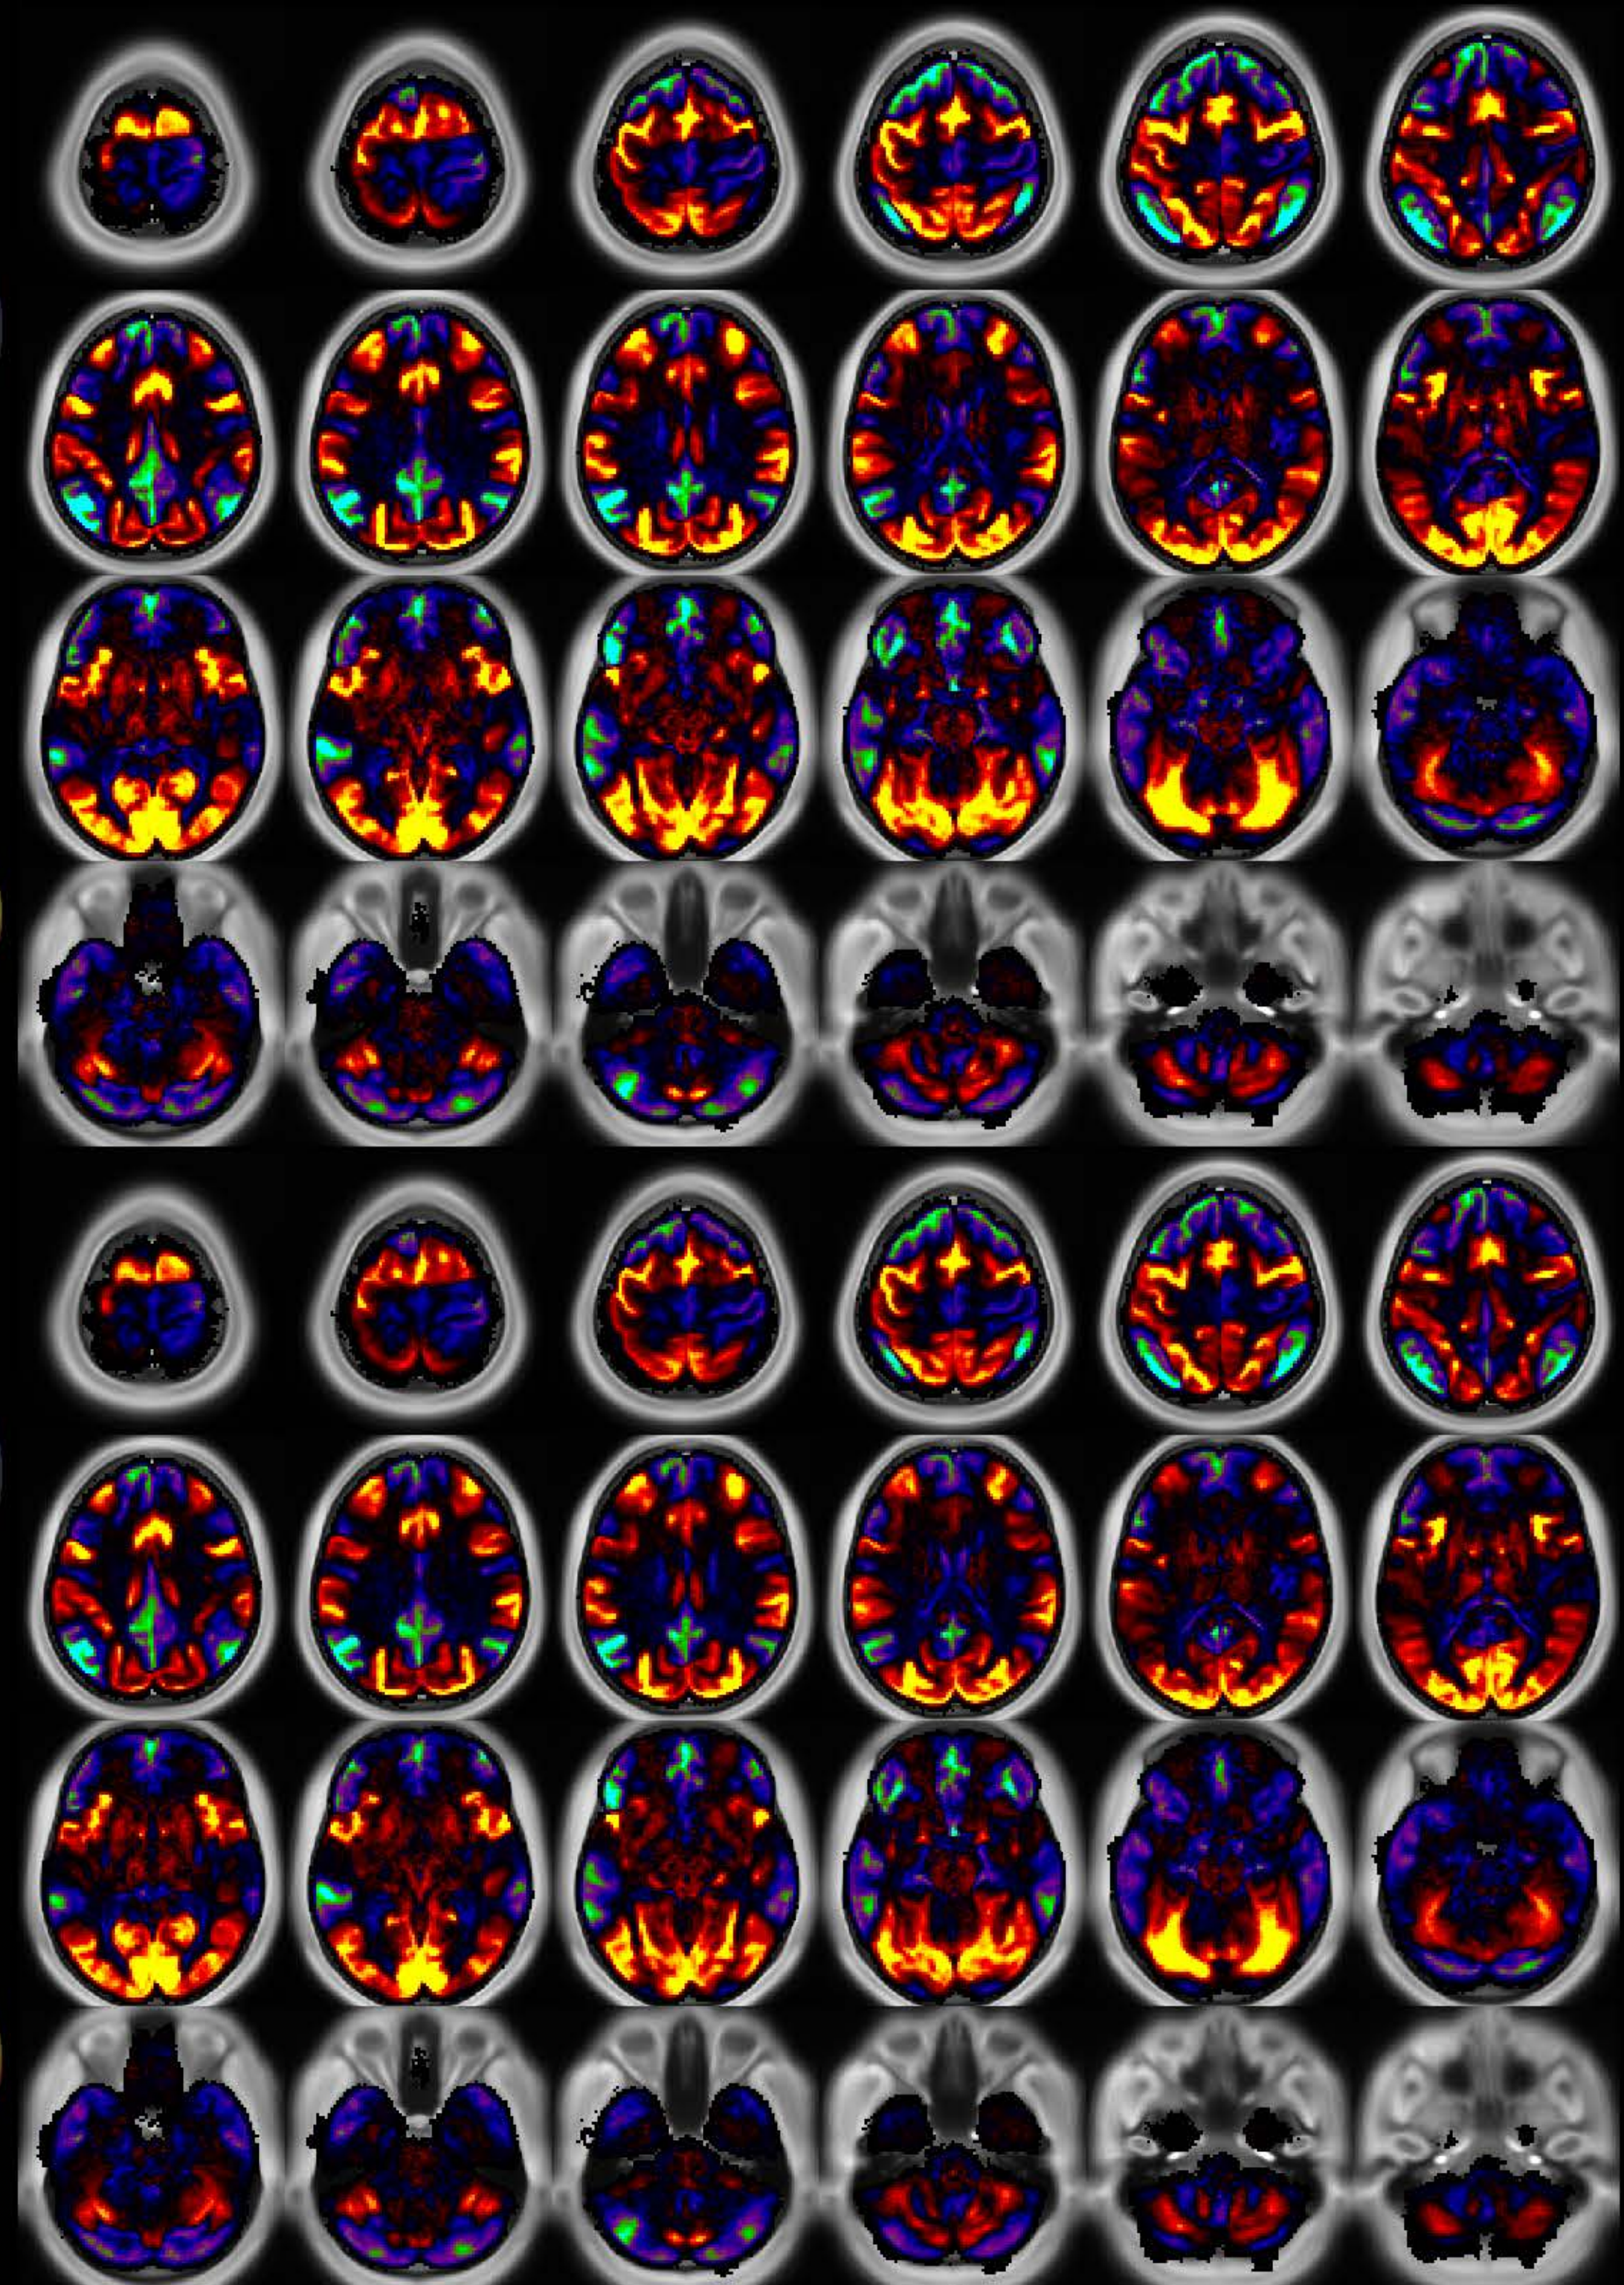

Seconds

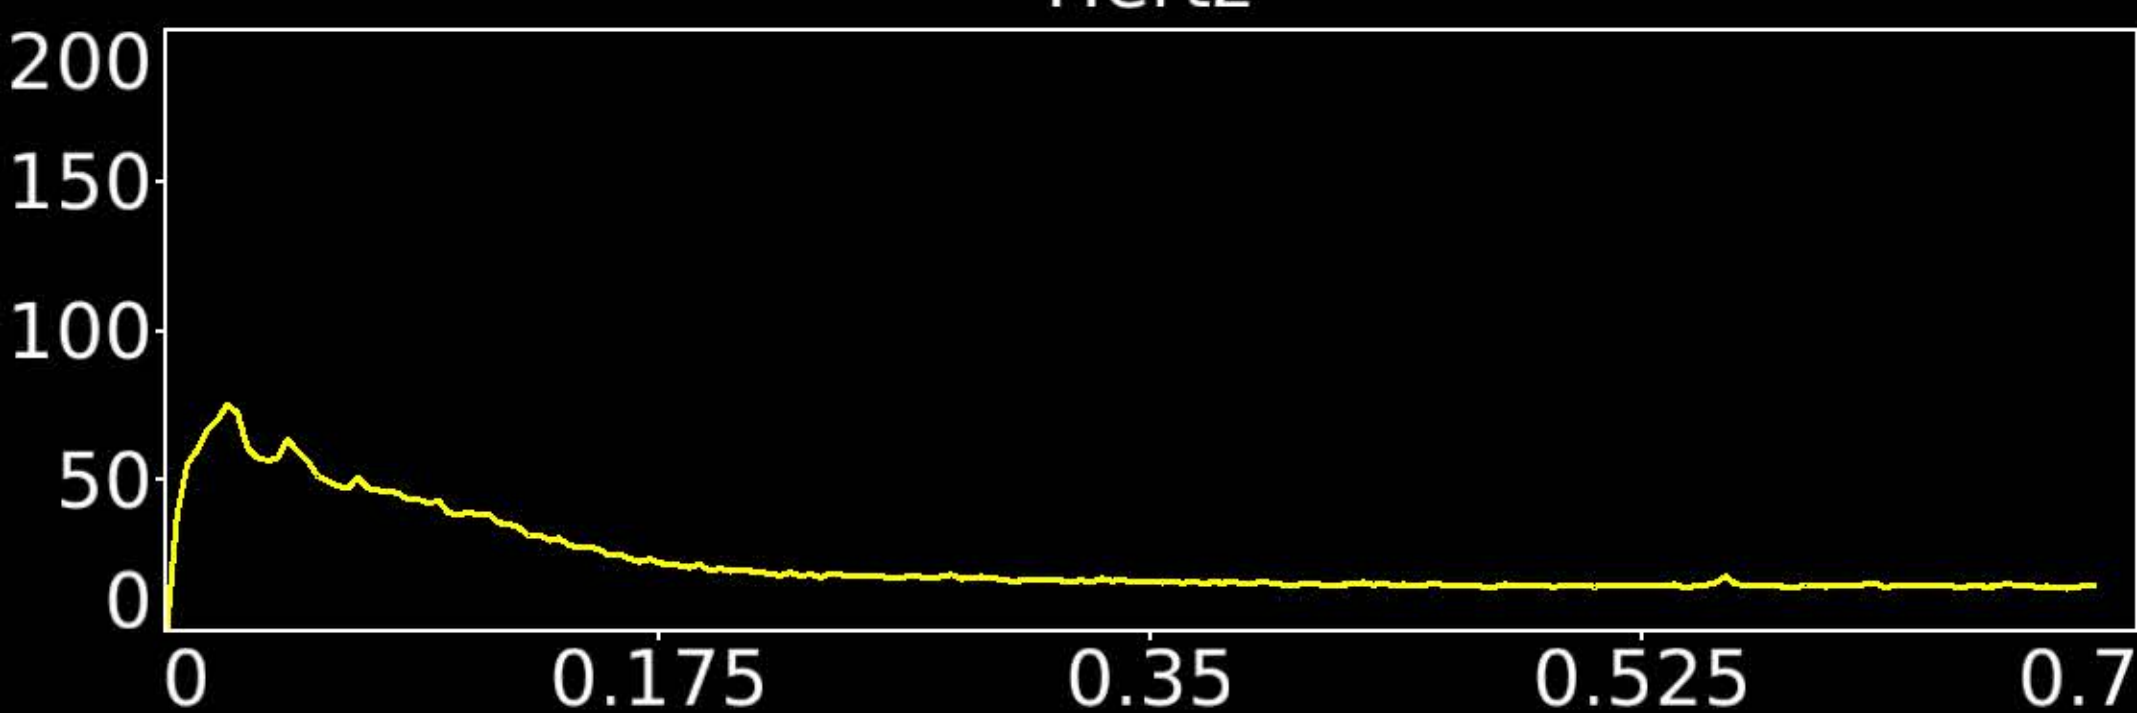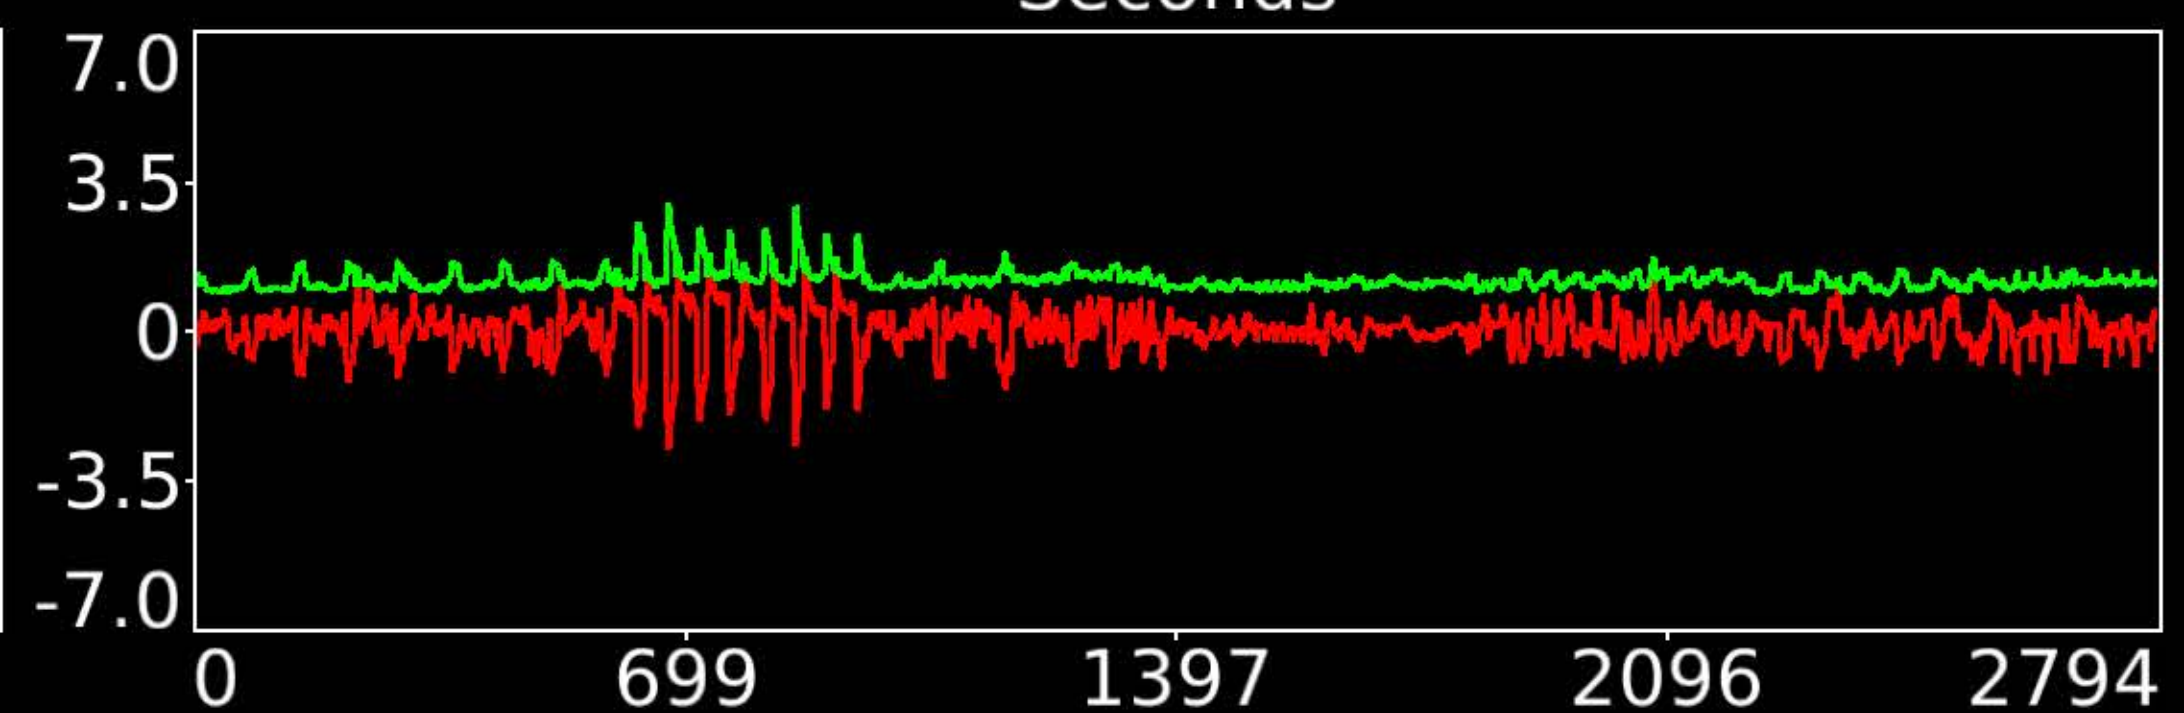

|                          |                            |                            |  |
|--------------------------|----------------------------|----------------------------|--|
| Number & Class: 9 Signal |                            | Name: Gambling Task Main   |  |
| RVT Correlated: No       | DVARS Dip Associated: No   | Cross-Subject Variable: No |  |
| Single Subject: No       | % Variance Explained: 2.47 | Globality Index: 0.42      |  |
| Rest Component: -9       | Taskr Component: -8        | Task Modulated: Gambling   |  |

Rationale: Spatial map includes positive and negative patches that are correlated with a specific task design



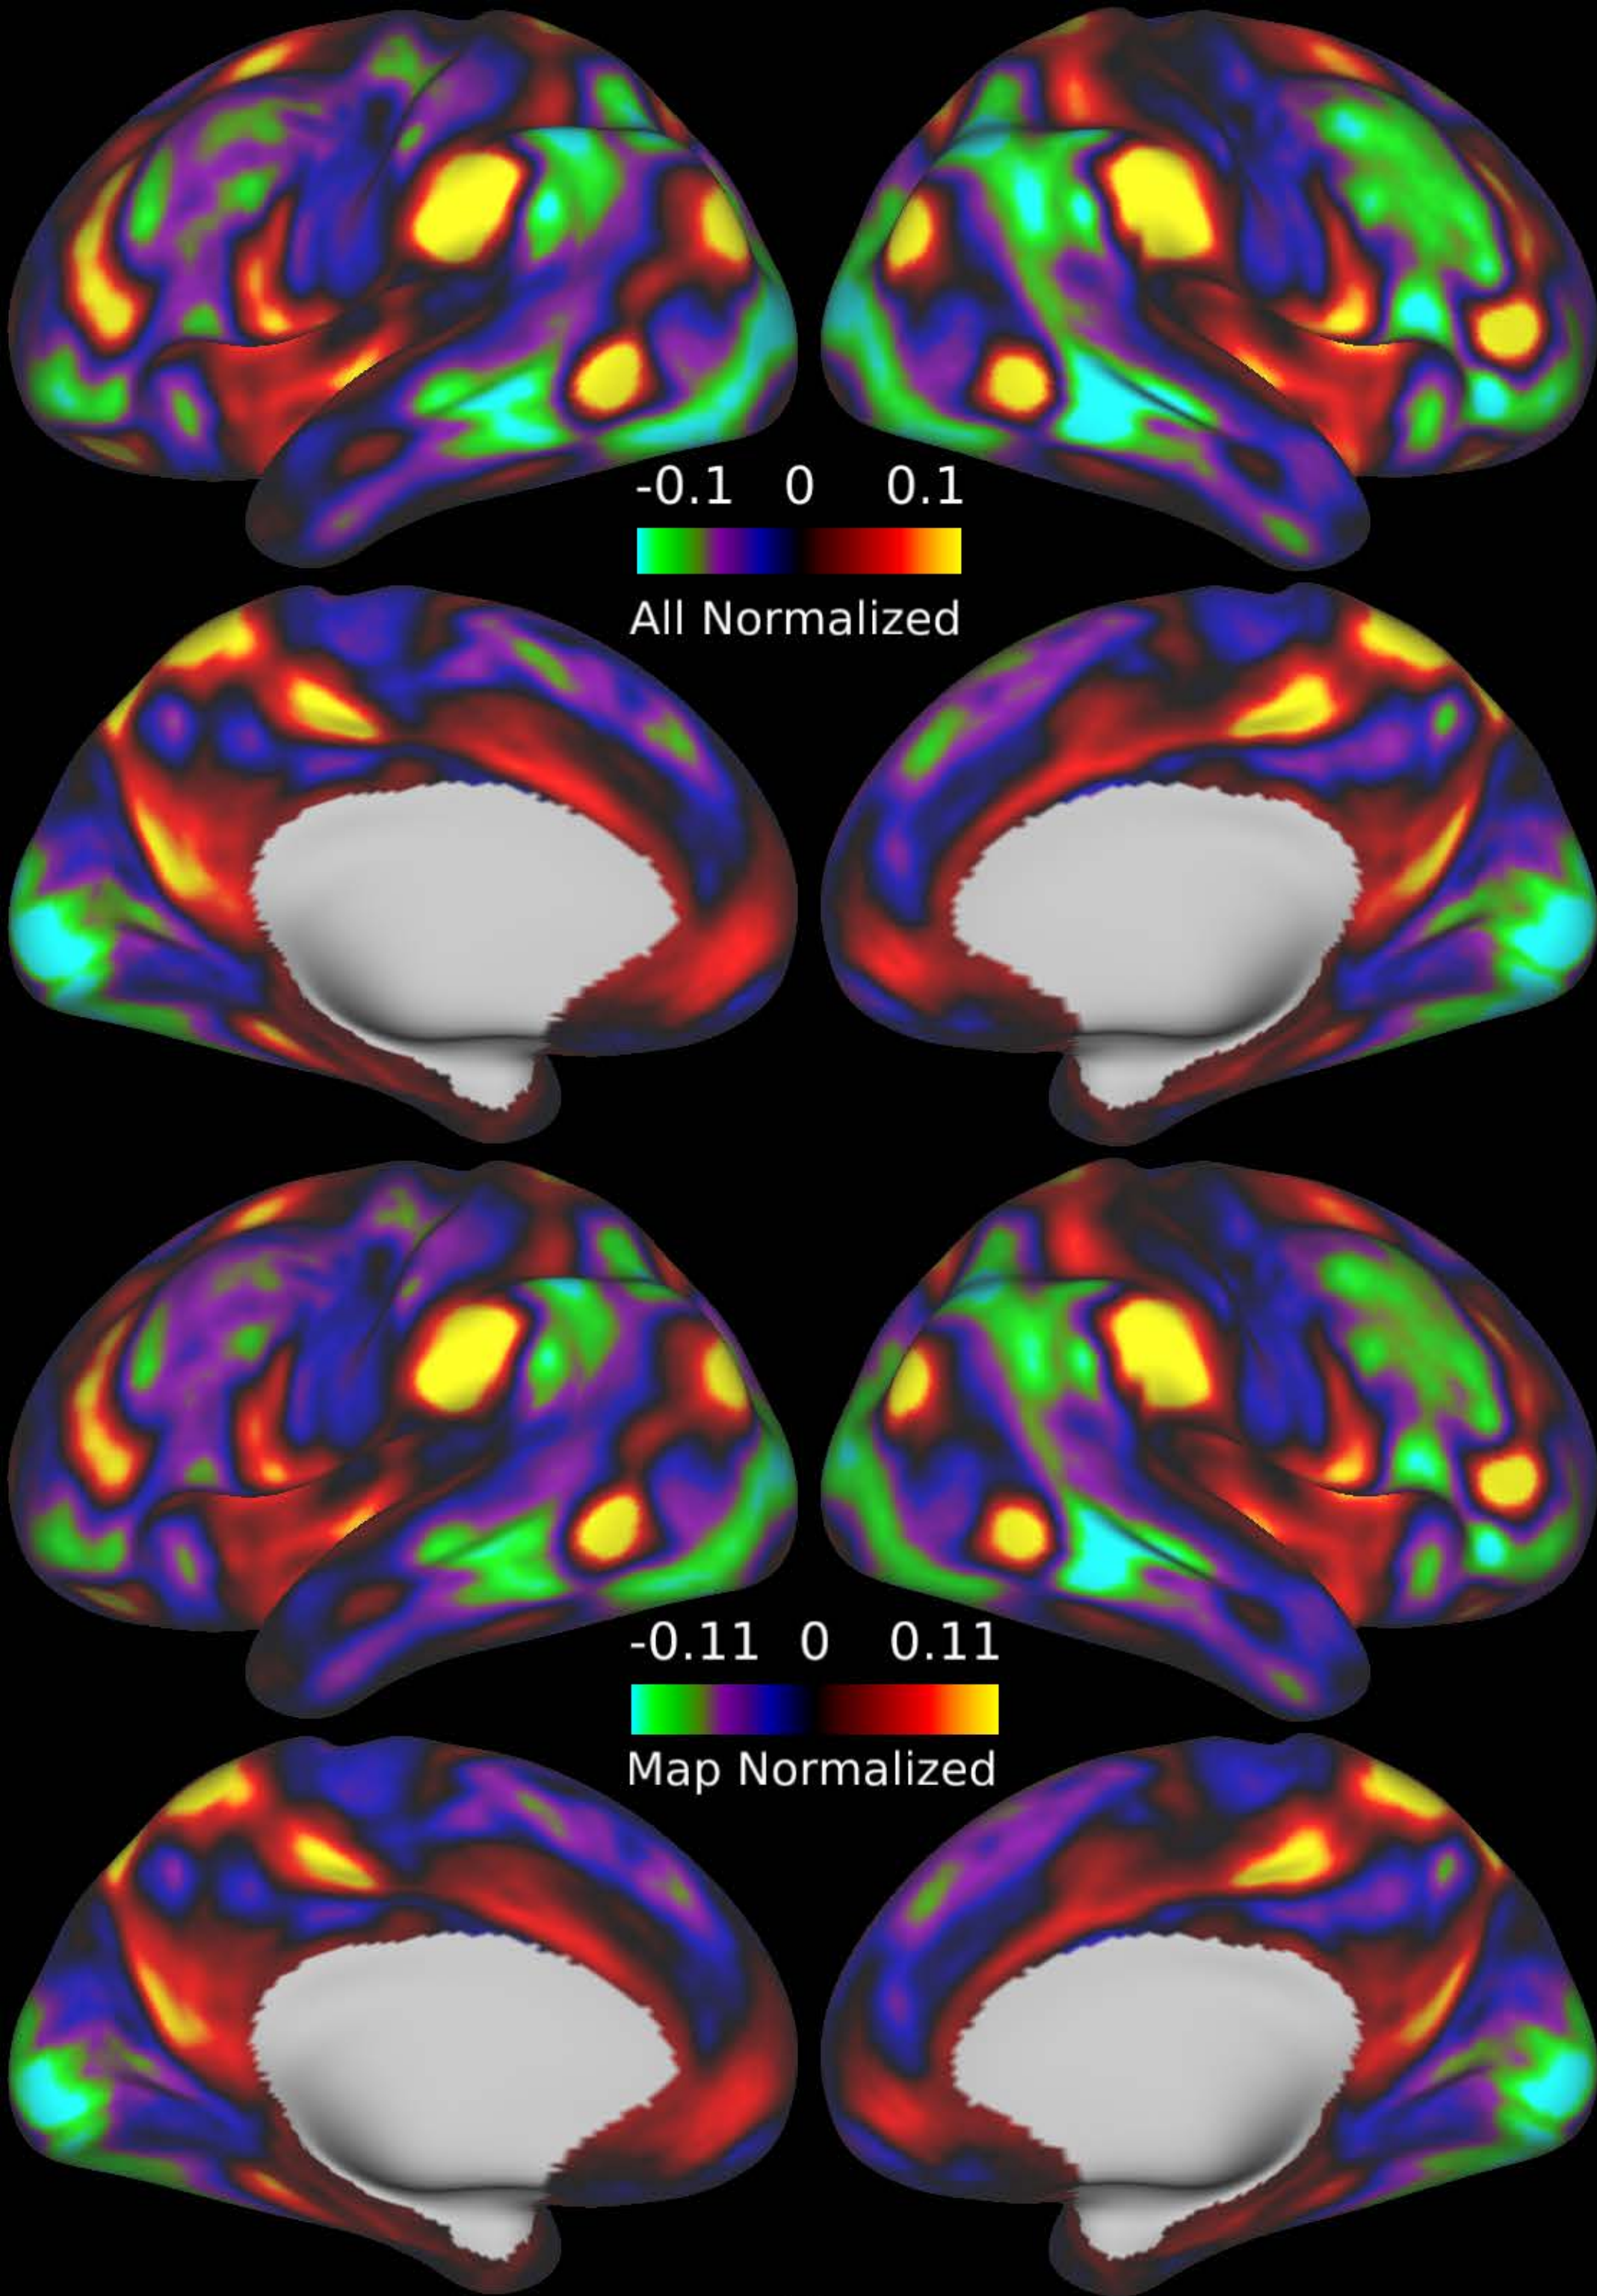

Hertz

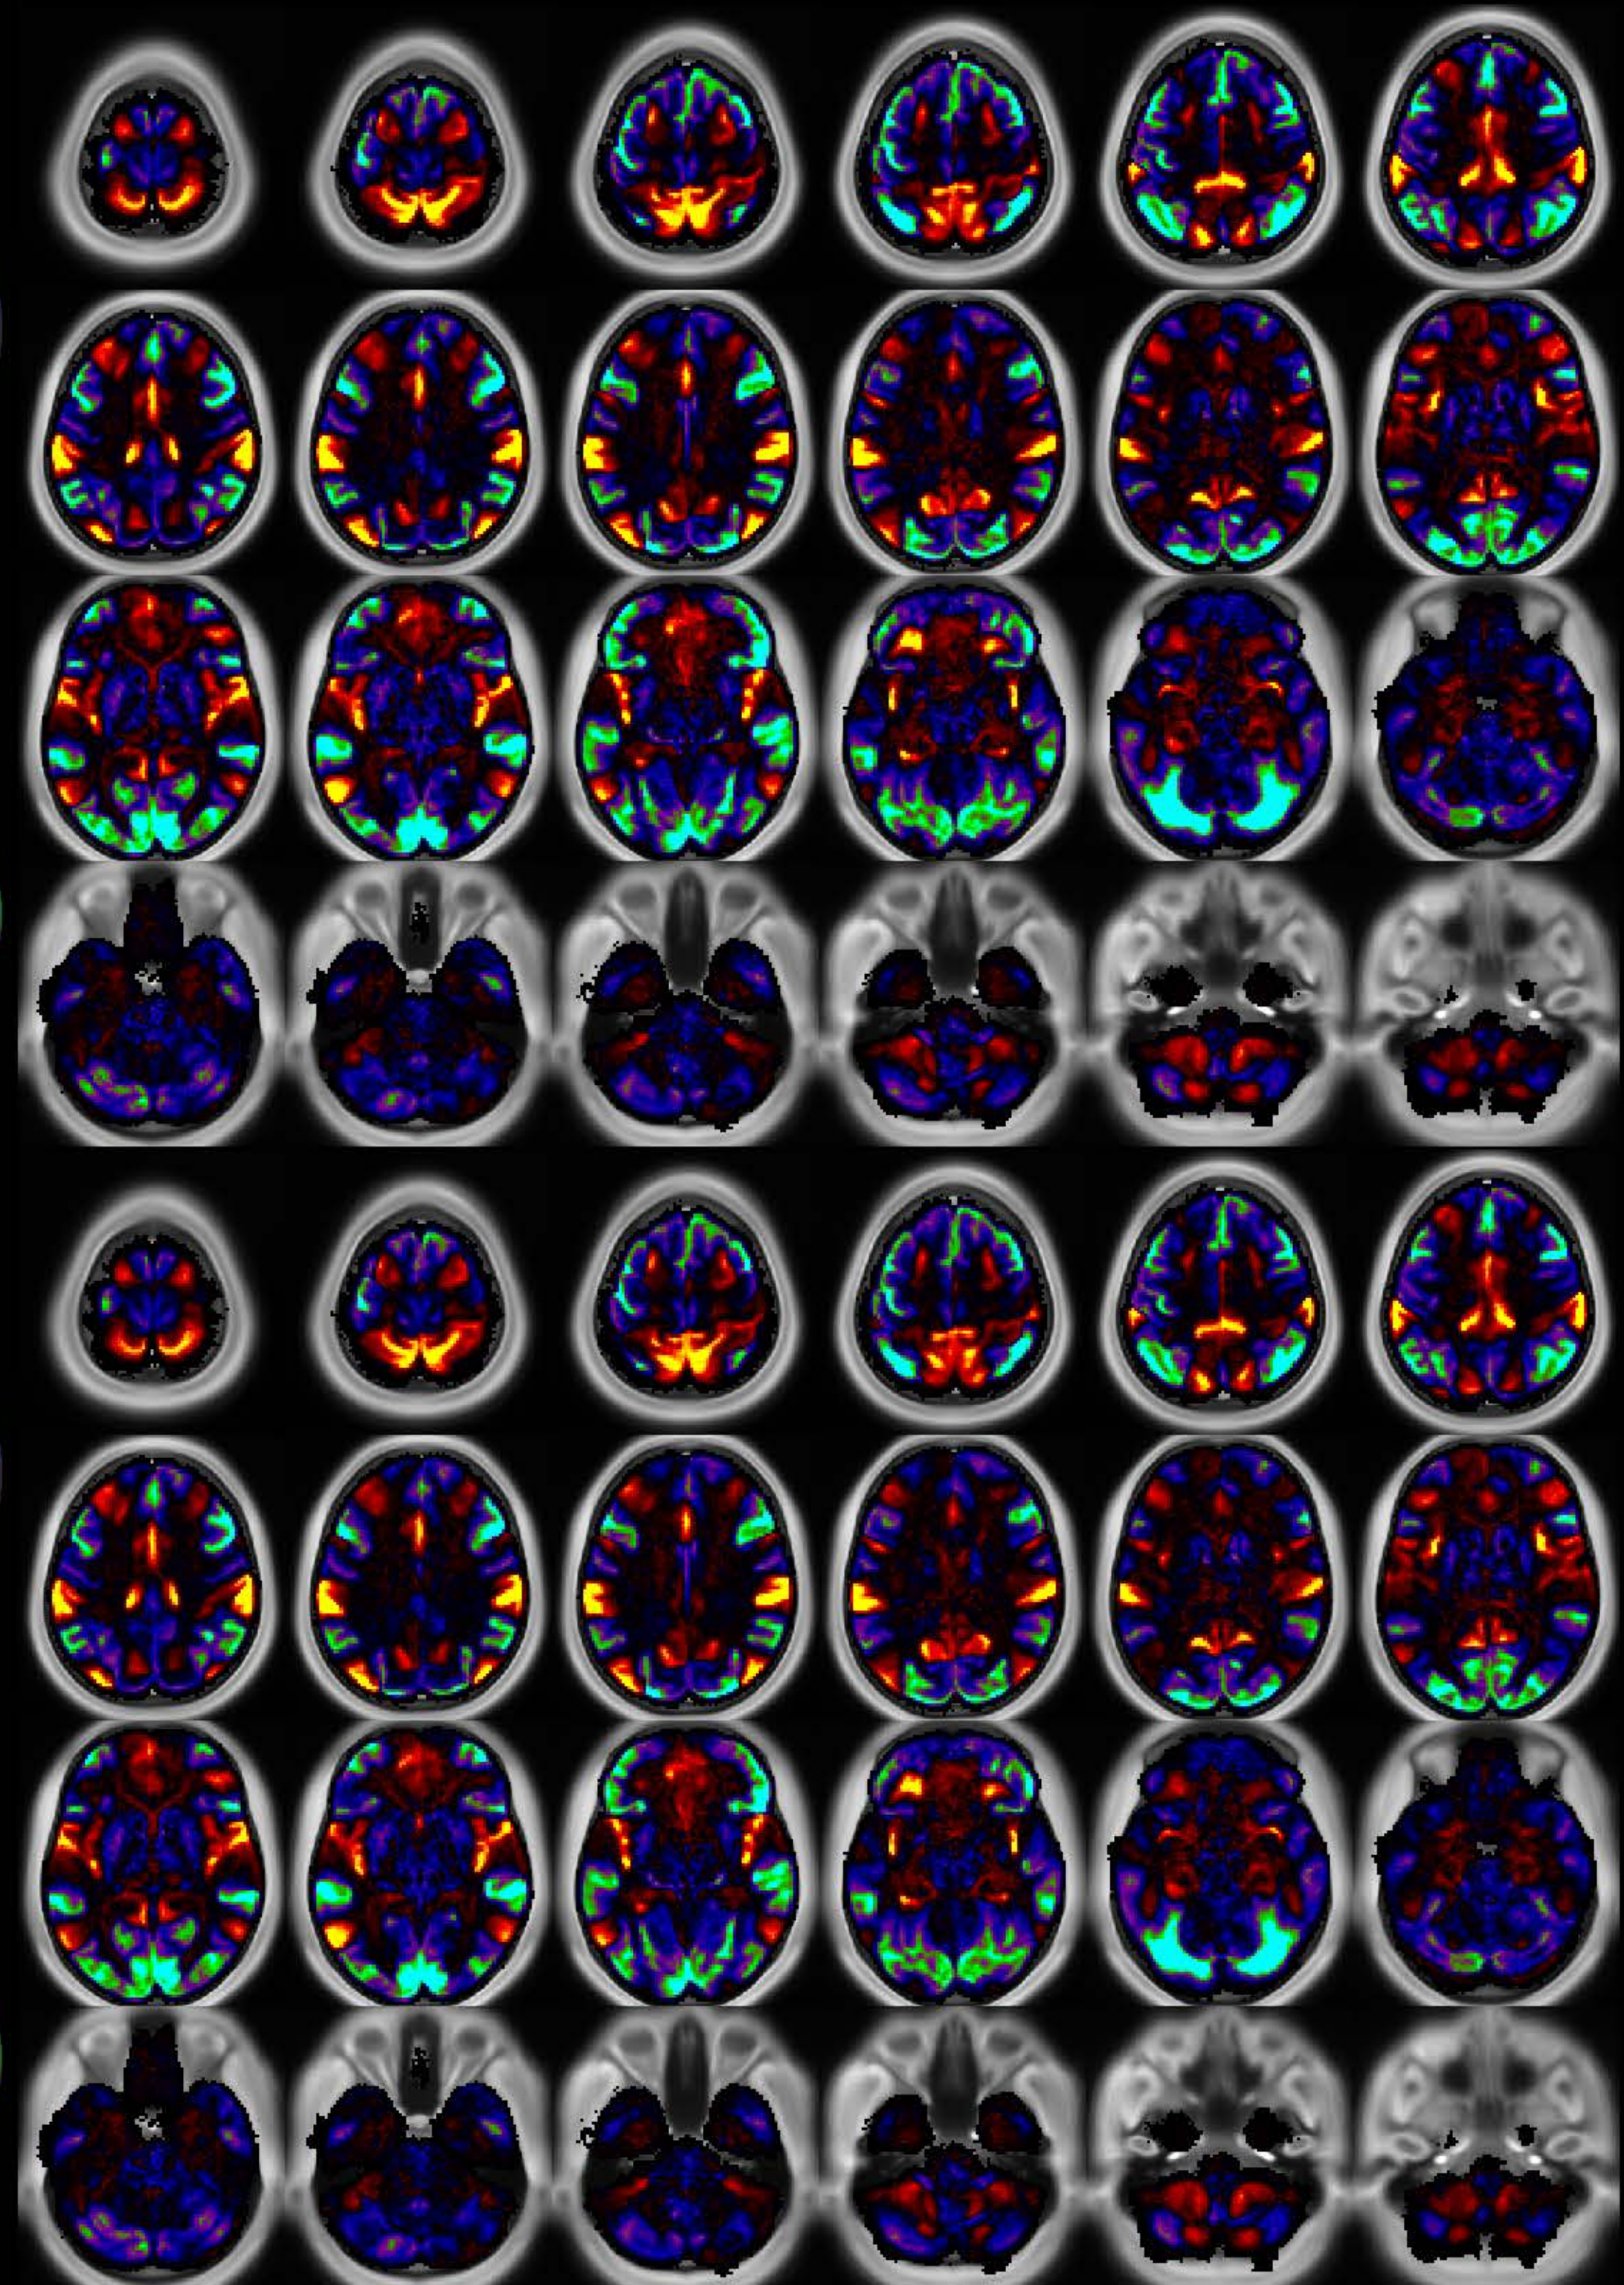

Seconds

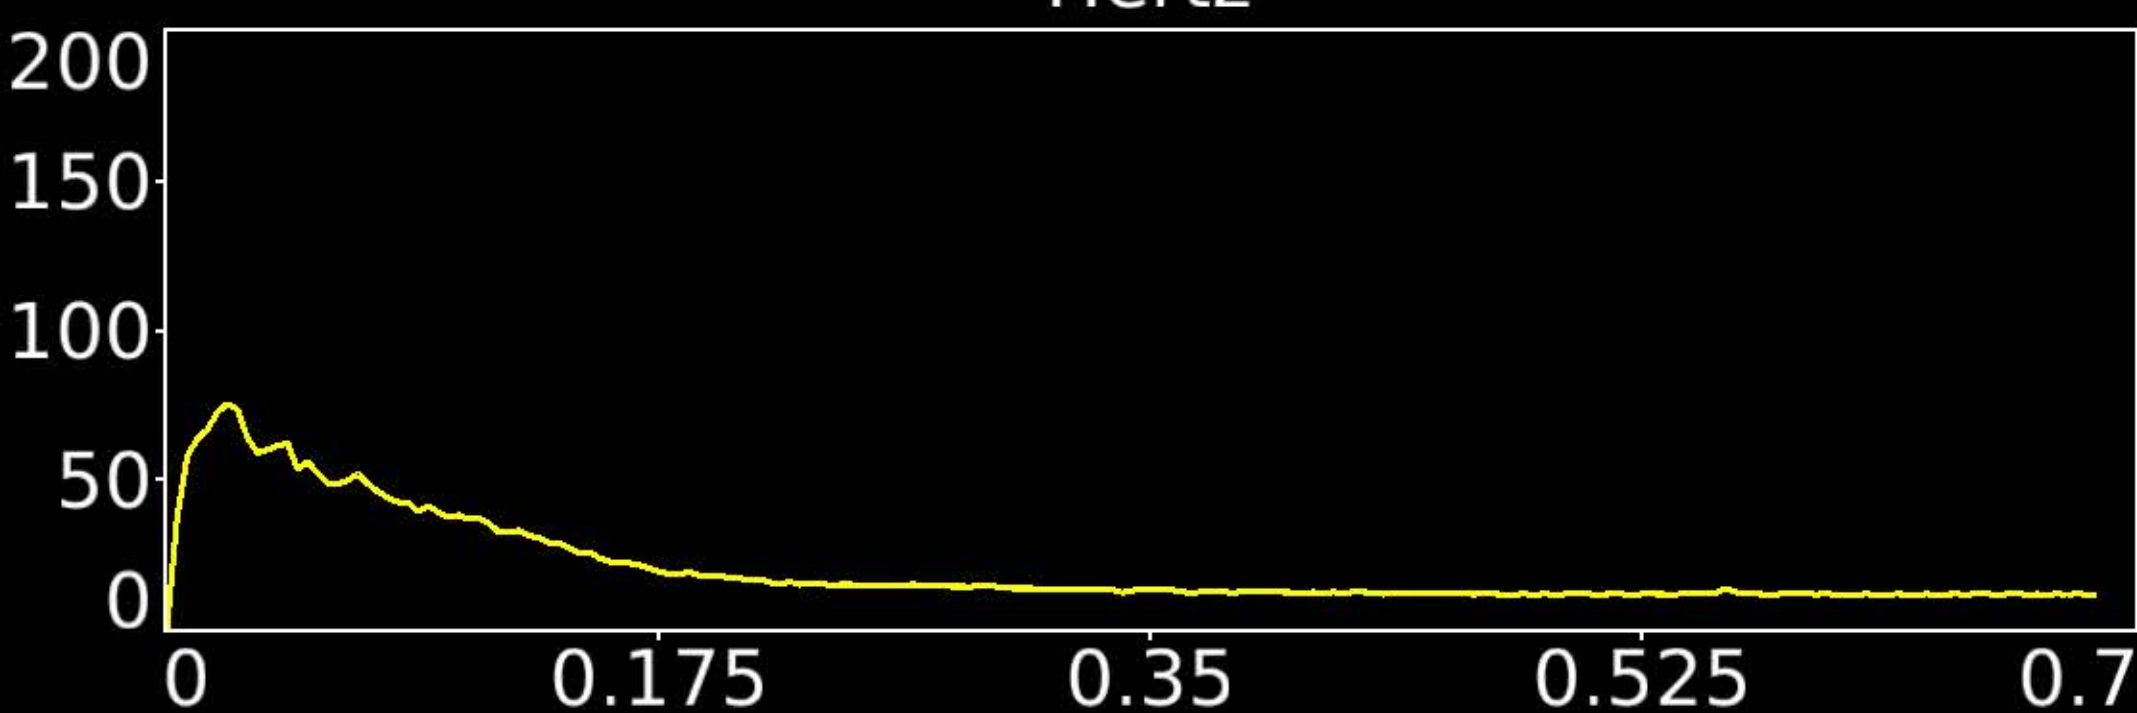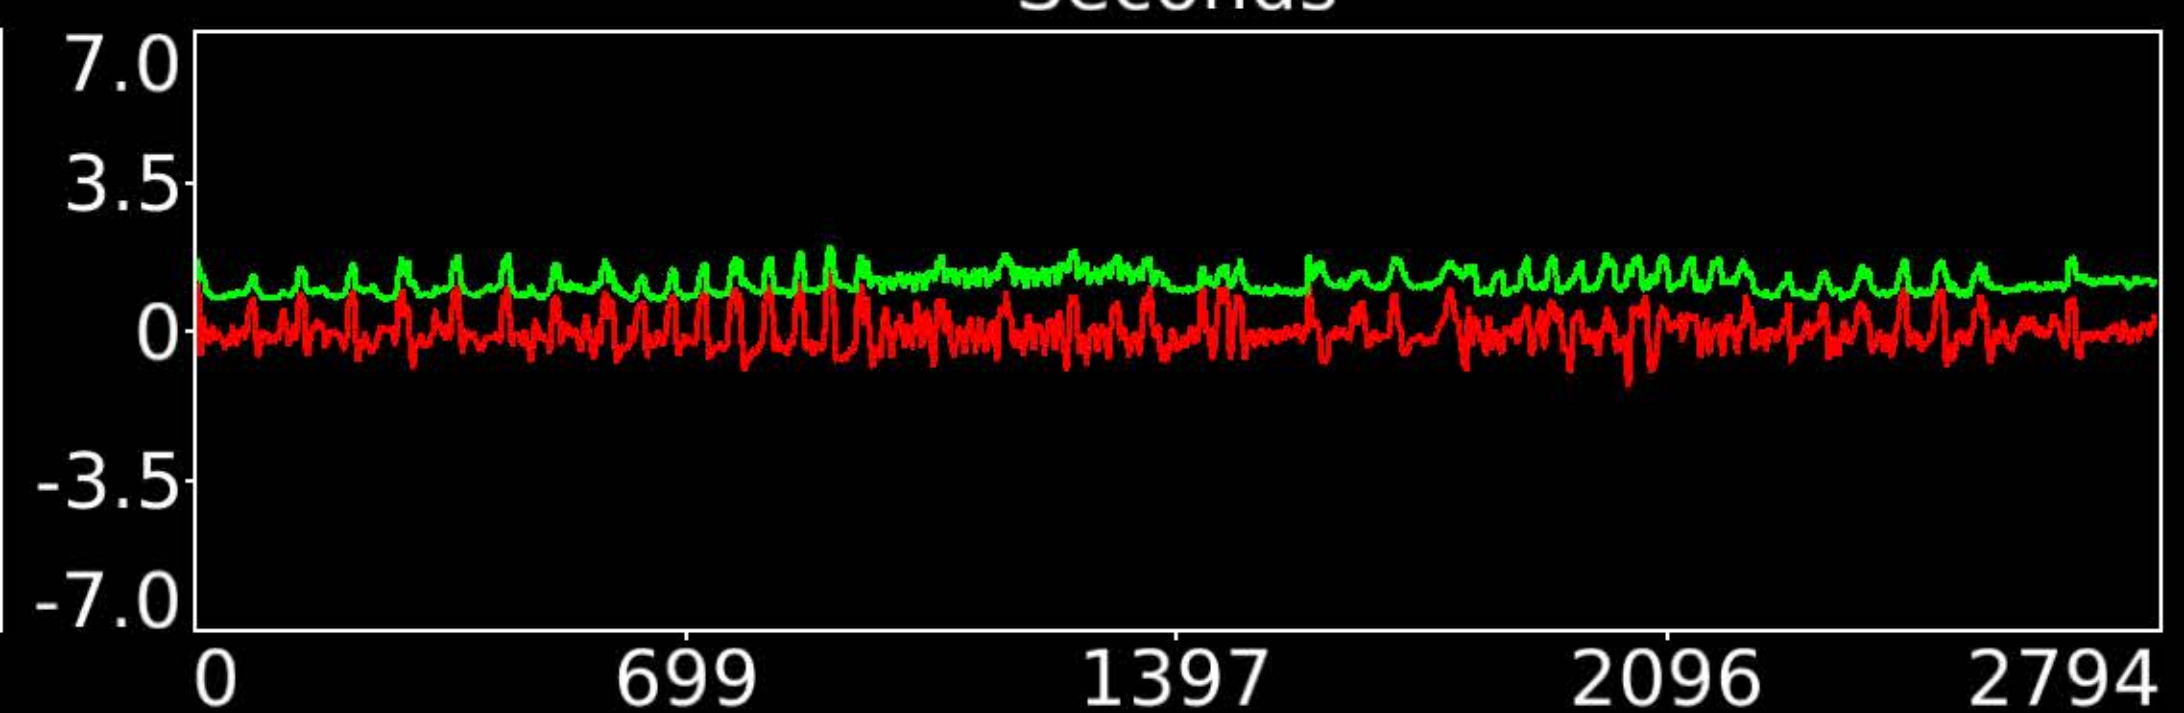

|                           |                            |                                 |  |
|---------------------------|----------------------------|---------------------------------|--|
| Number & Class: 10 Signal |                            | Name: Cingulo-Opercular Network |  |
| RVT Correlated: No        | DVARS Dip Associated: No   | Cross-Subject Variable: No      |  |
| Single Subject: No        | % Variance Explained: 2.38 | Globality Index: 0.71           |  |
| Rest Component: 13        | Taskr Component: 9         | Task Modulated: No              |  |

Rationale: Spatial map includes positive and negative patches that respect known RSNs (e.g. Cingulo-Opercular Network)



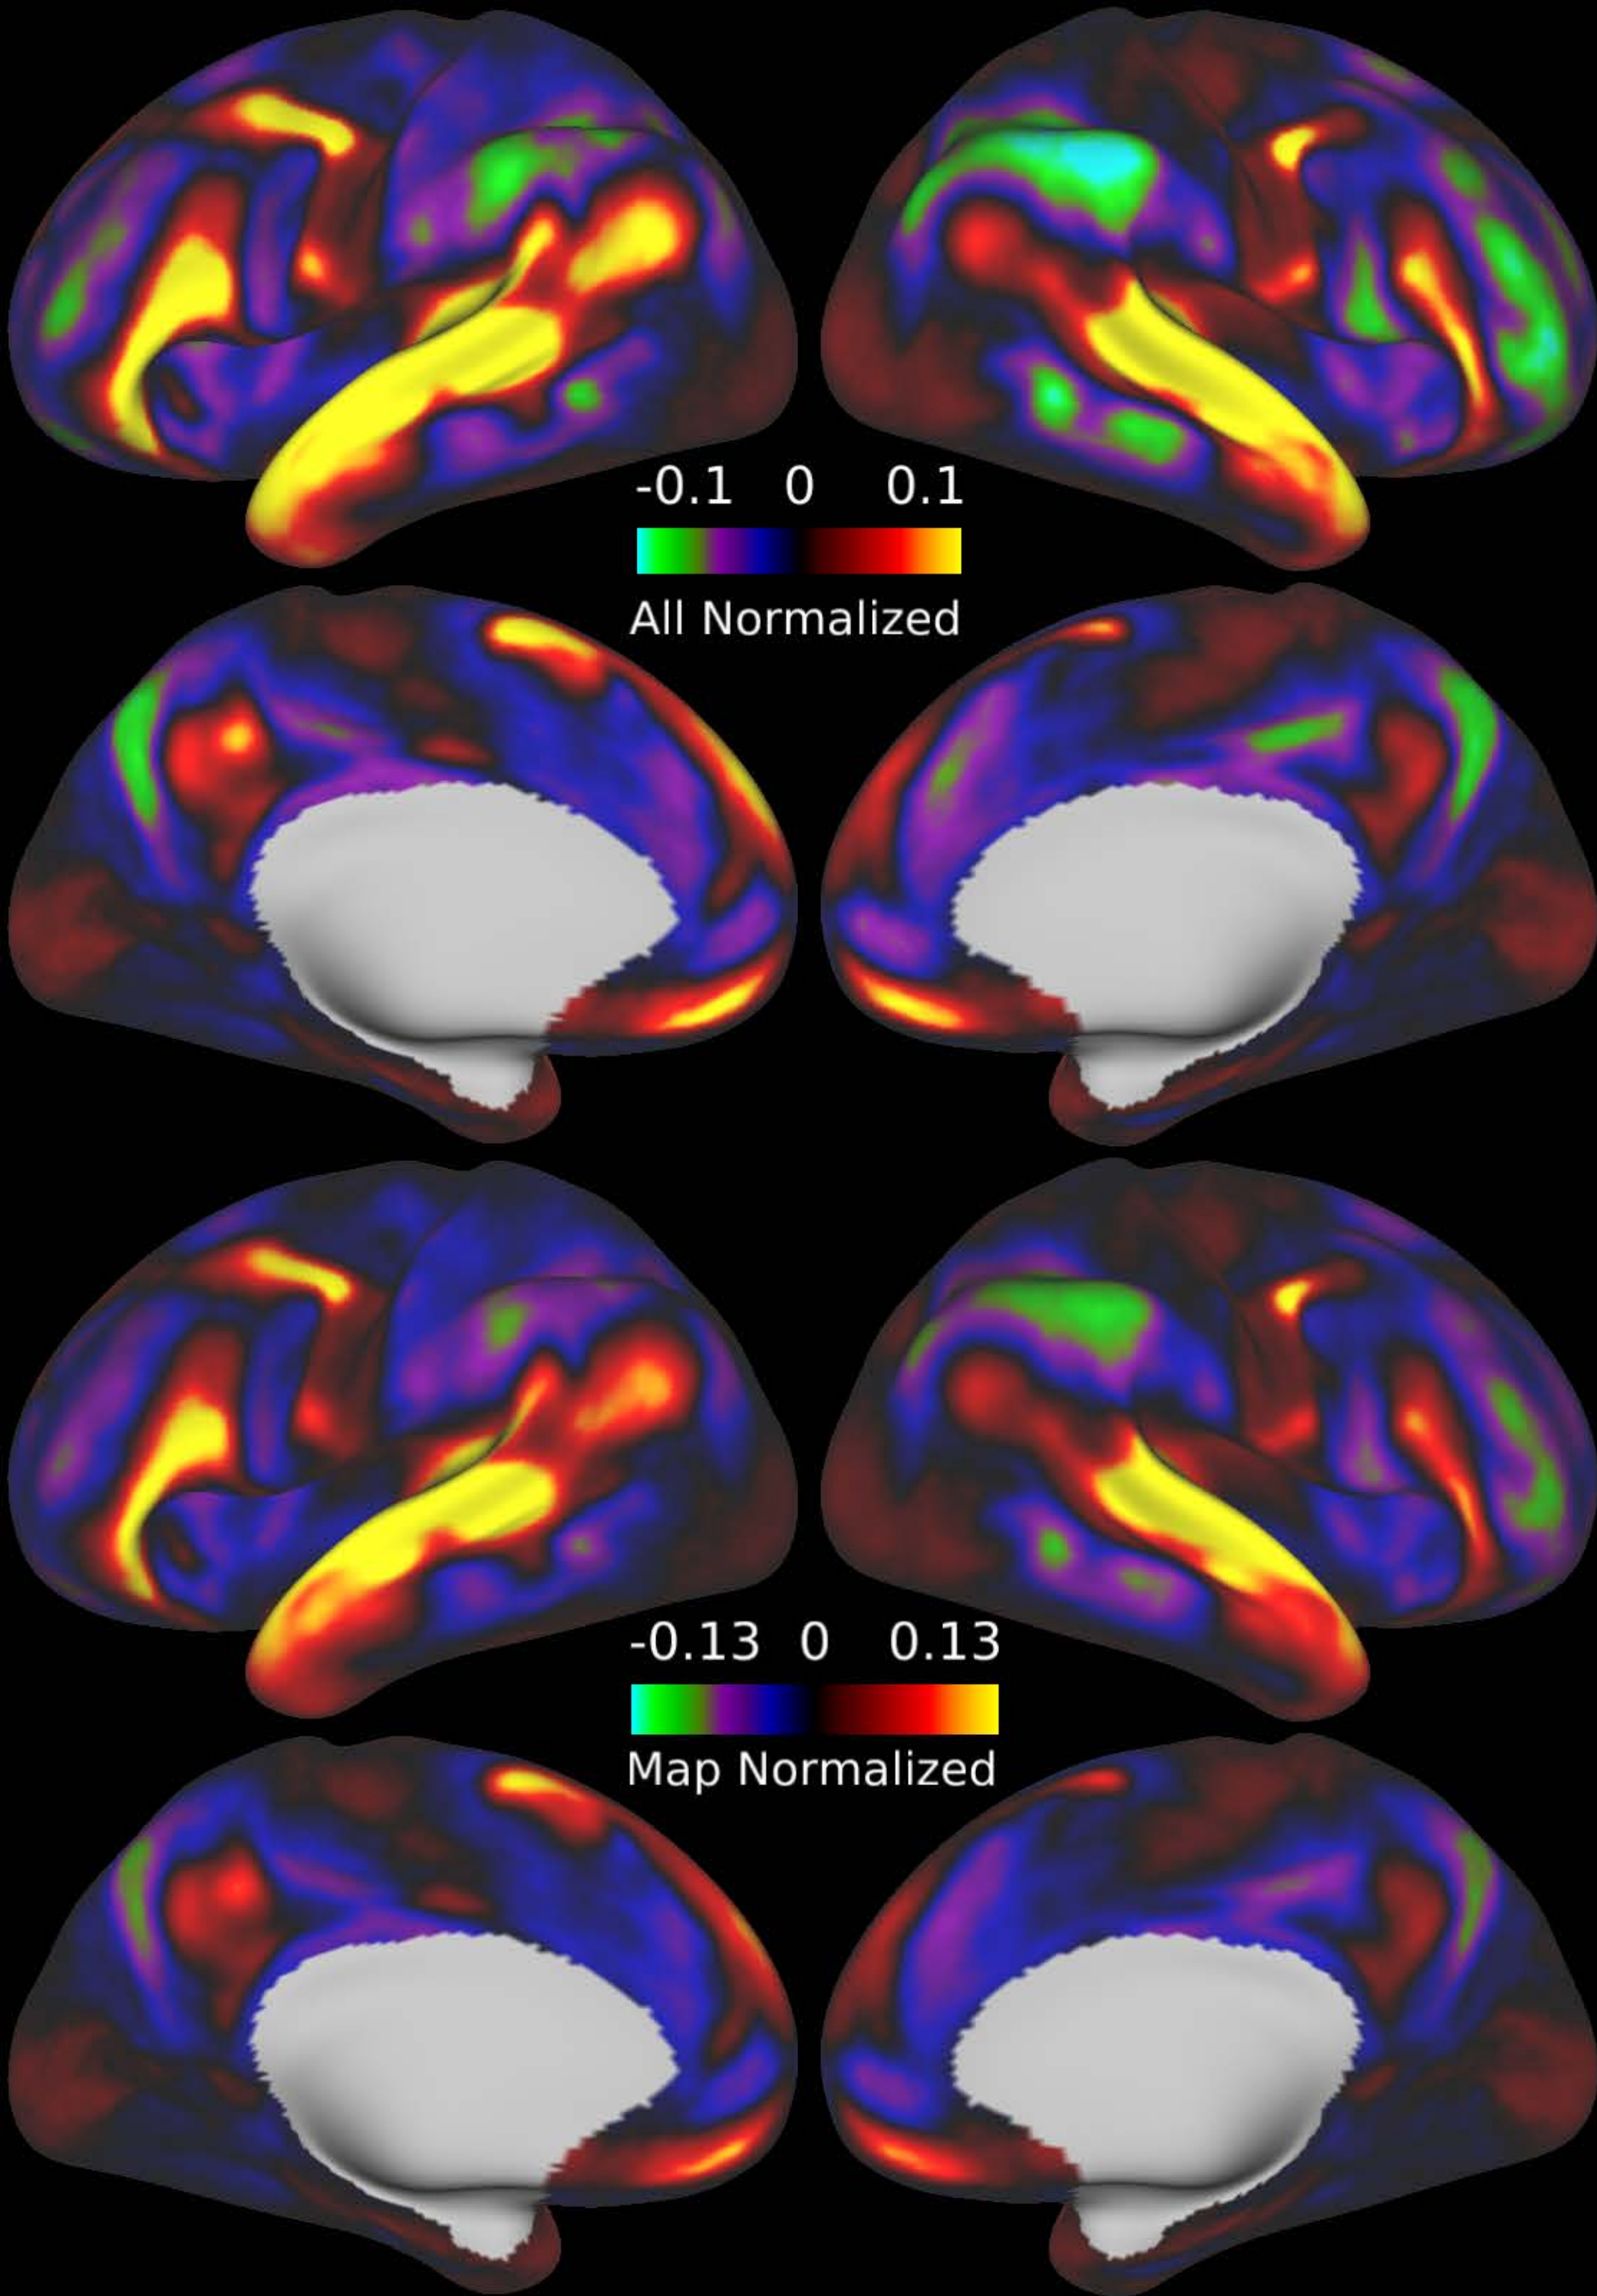

Hertz

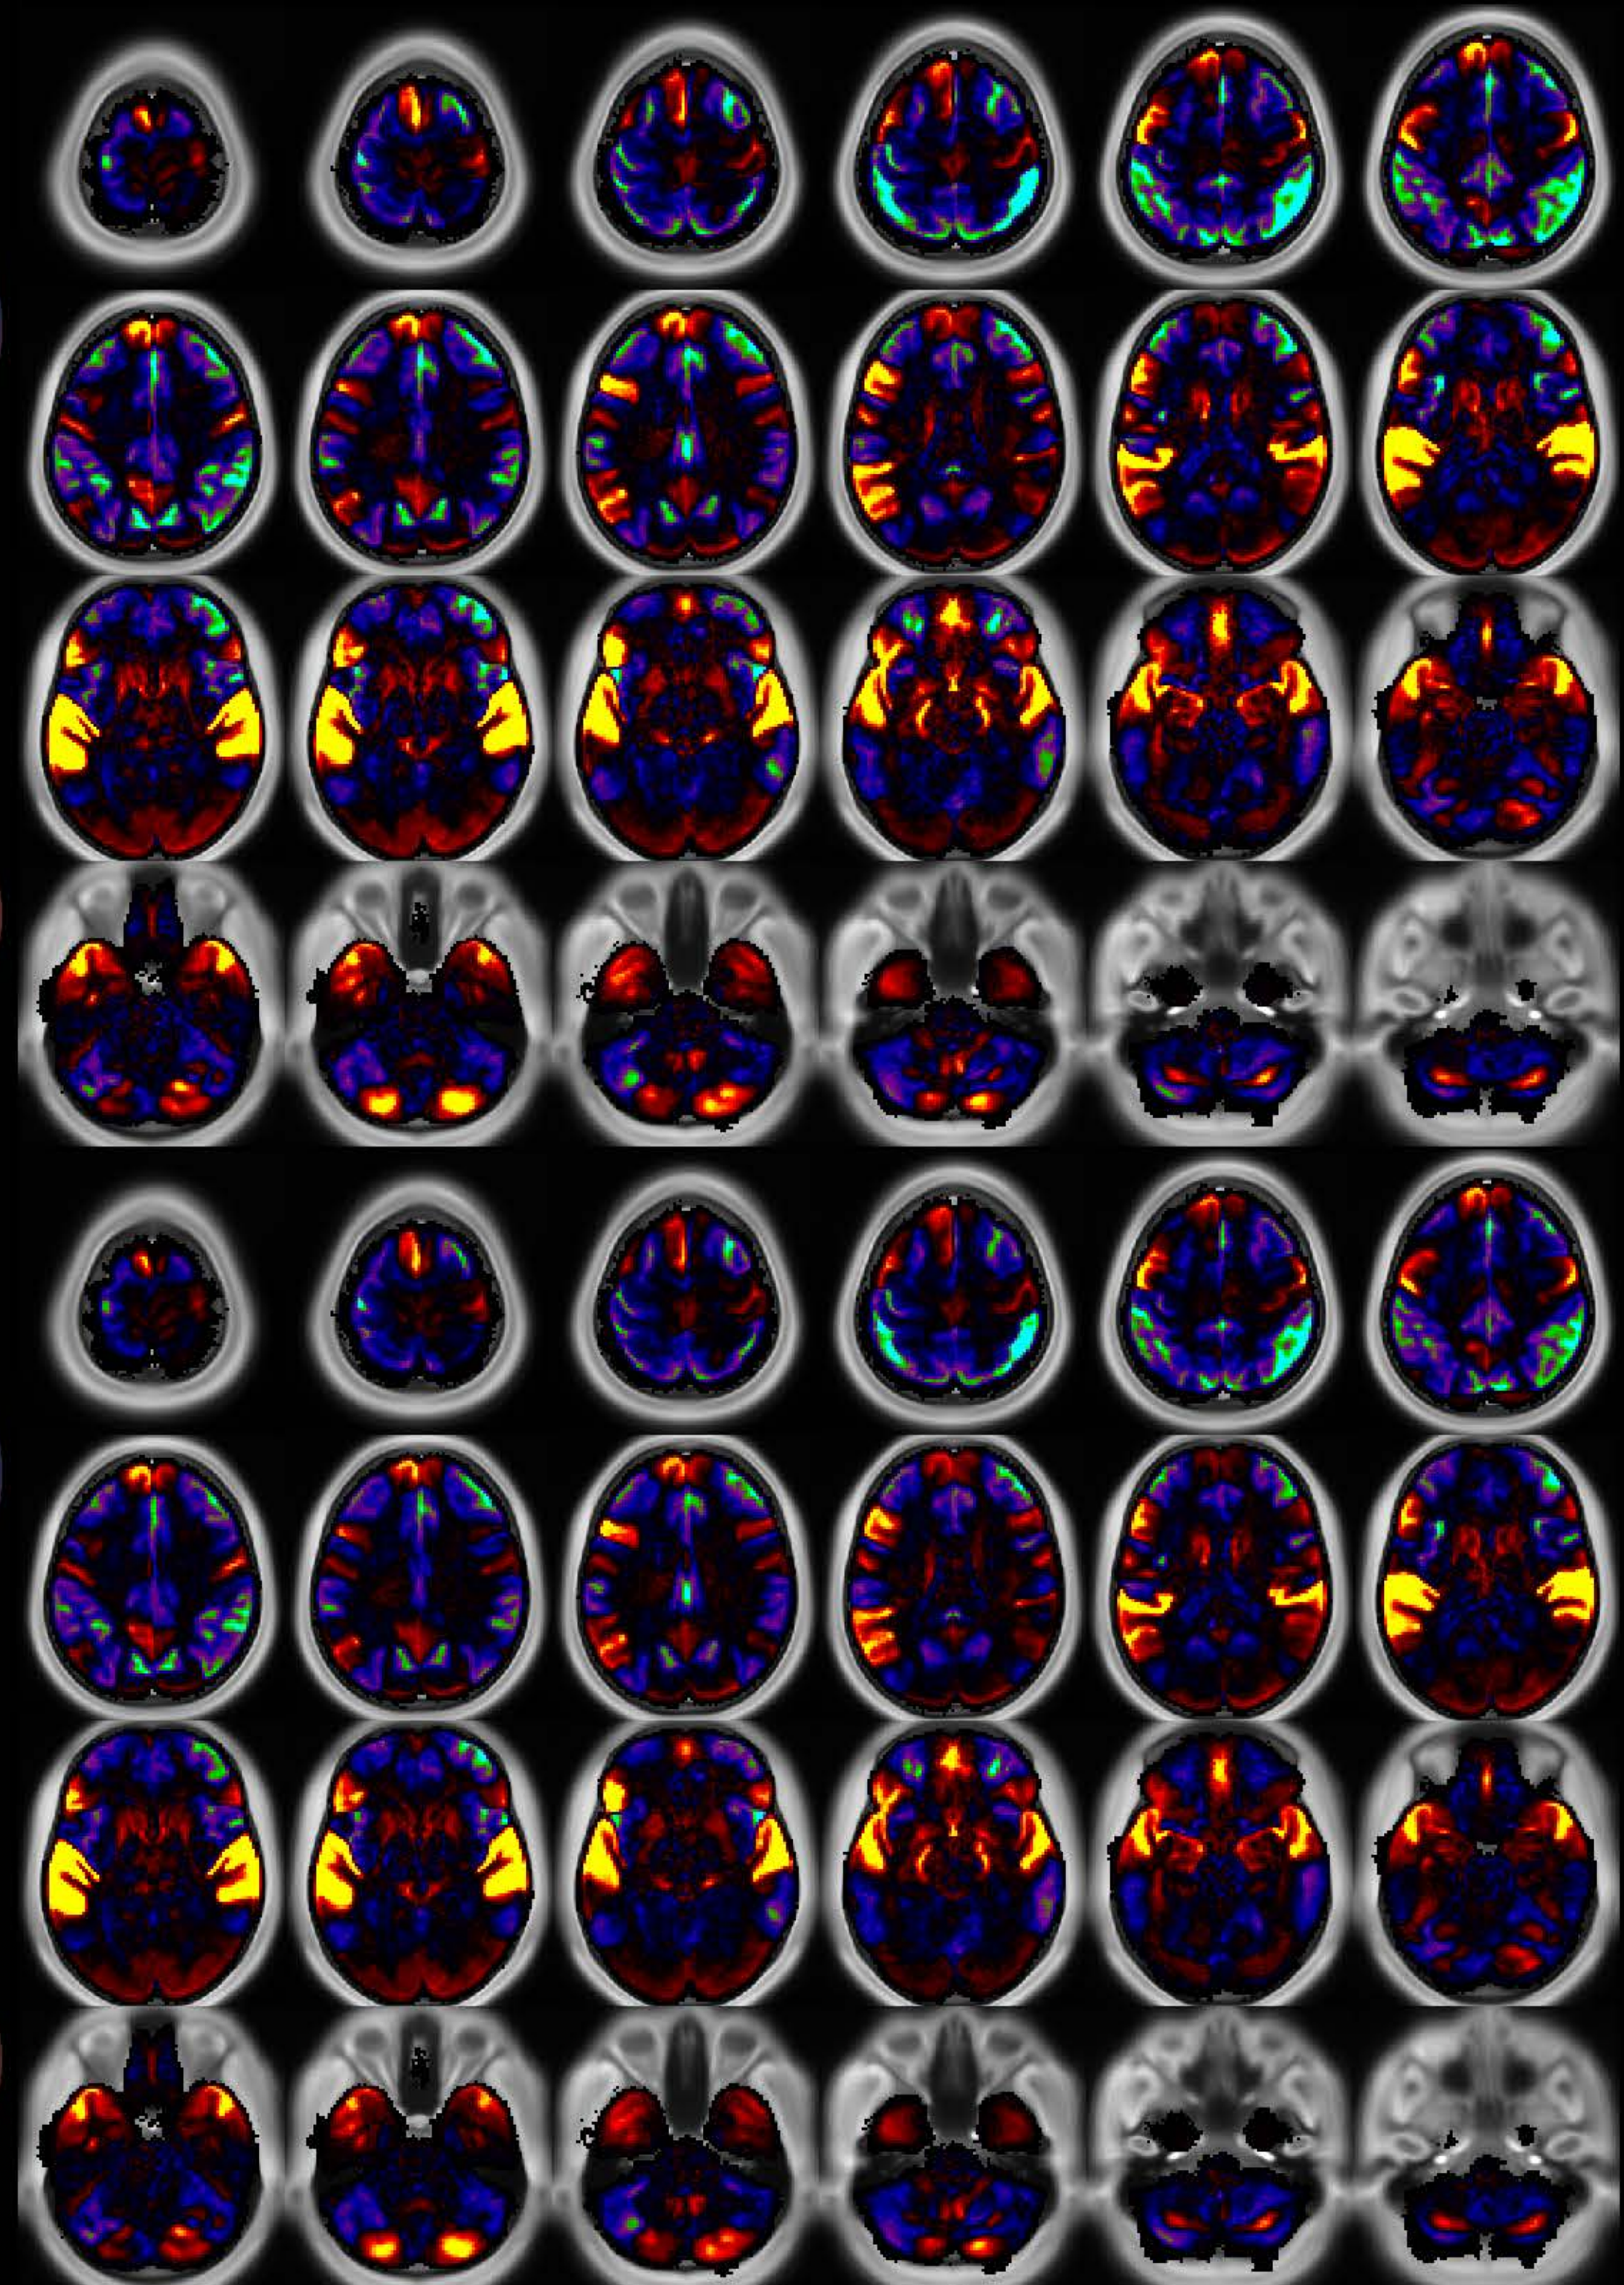

Seconds

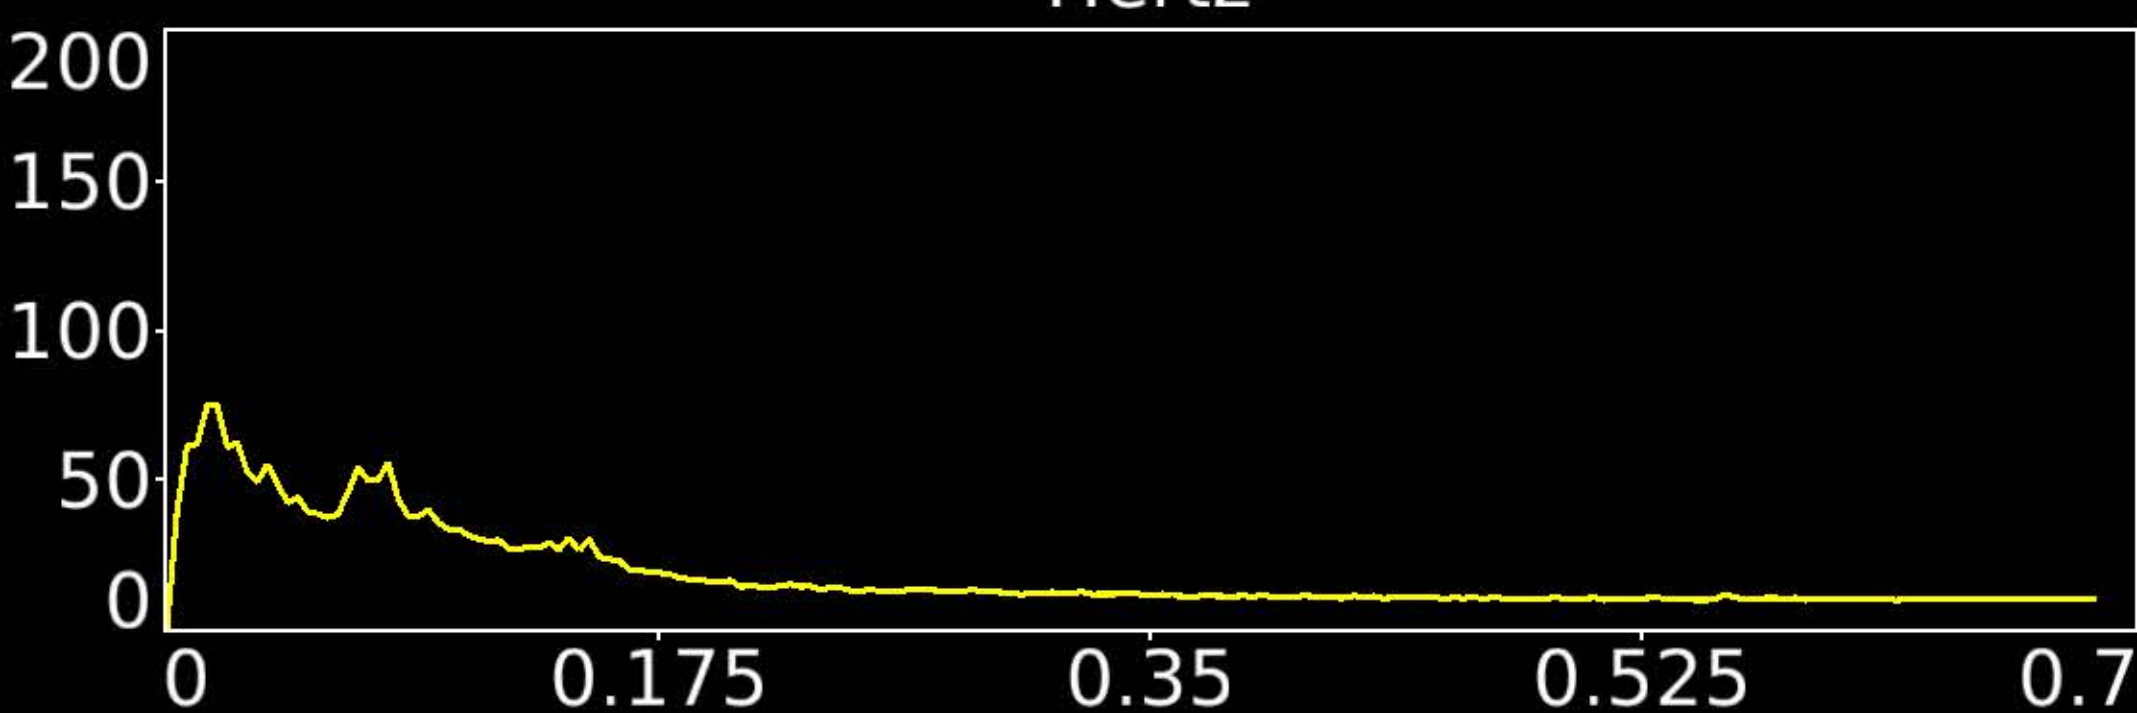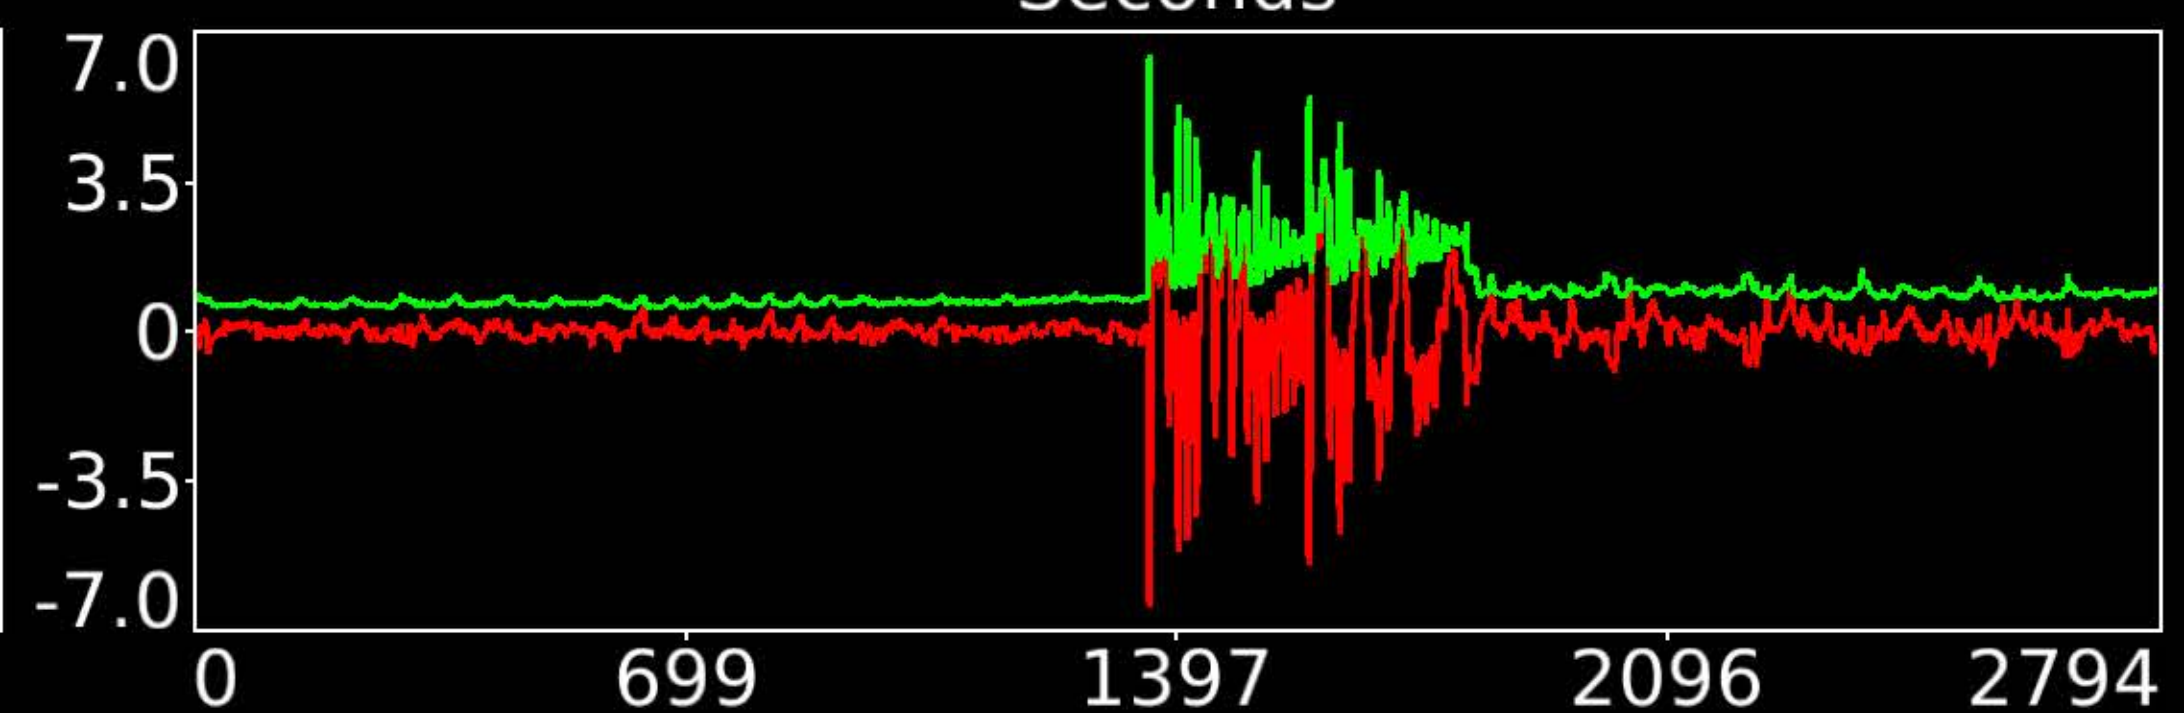

|                                                                                                               |                            |                            |  |
|---------------------------------------------------------------------------------------------------------------|----------------------------|----------------------------|--|
| Number & Class: 11 Signal                                                                                     |                            | Name: Language Task Story  |  |
| RVT Correlated: No                                                                                            | DVARS Dip Associated: No   | Cross-Subject Variable: No |  |
| Single Subject: No                                                                                            | % Variance Explained: 2.22 | Globality Index: 0.26      |  |
| Rest Component: No                                                                                            | Taskr Component: -4        | Task Modulated: Language   |  |
| Rationale: Spatial map includes positive and negative patches that are correlated with a specific task design |                            |                            |  |



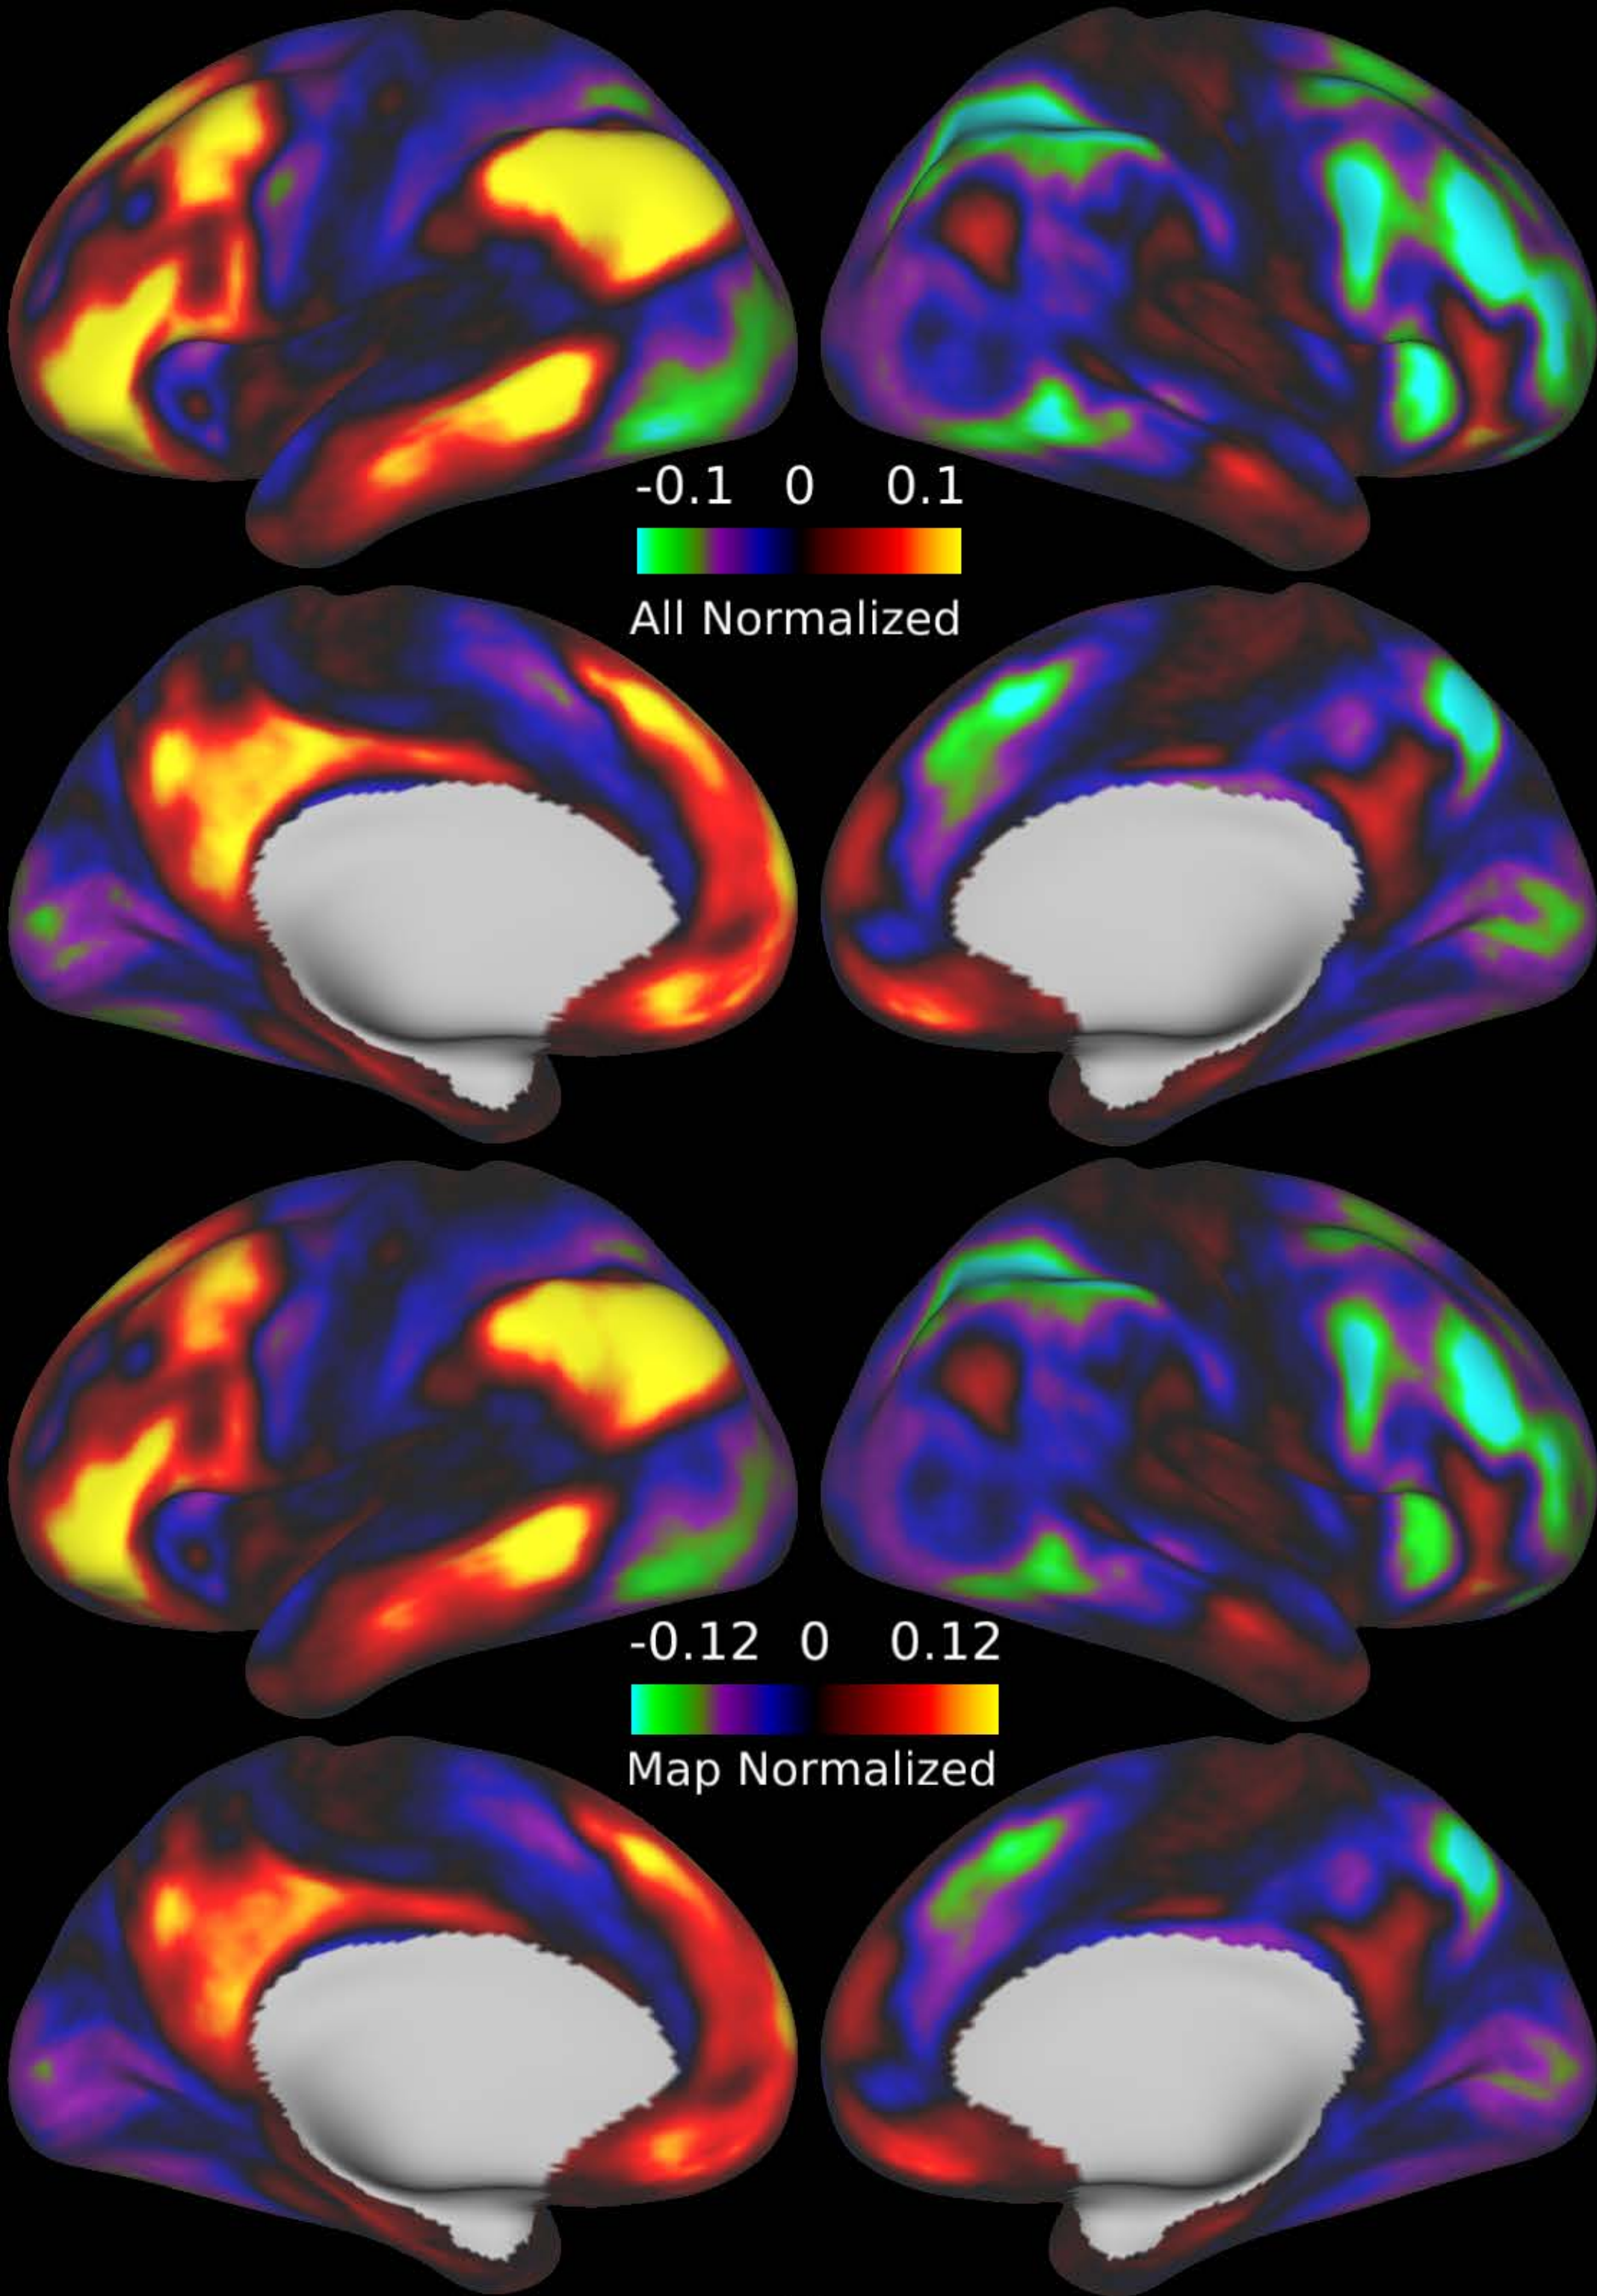

Hertz

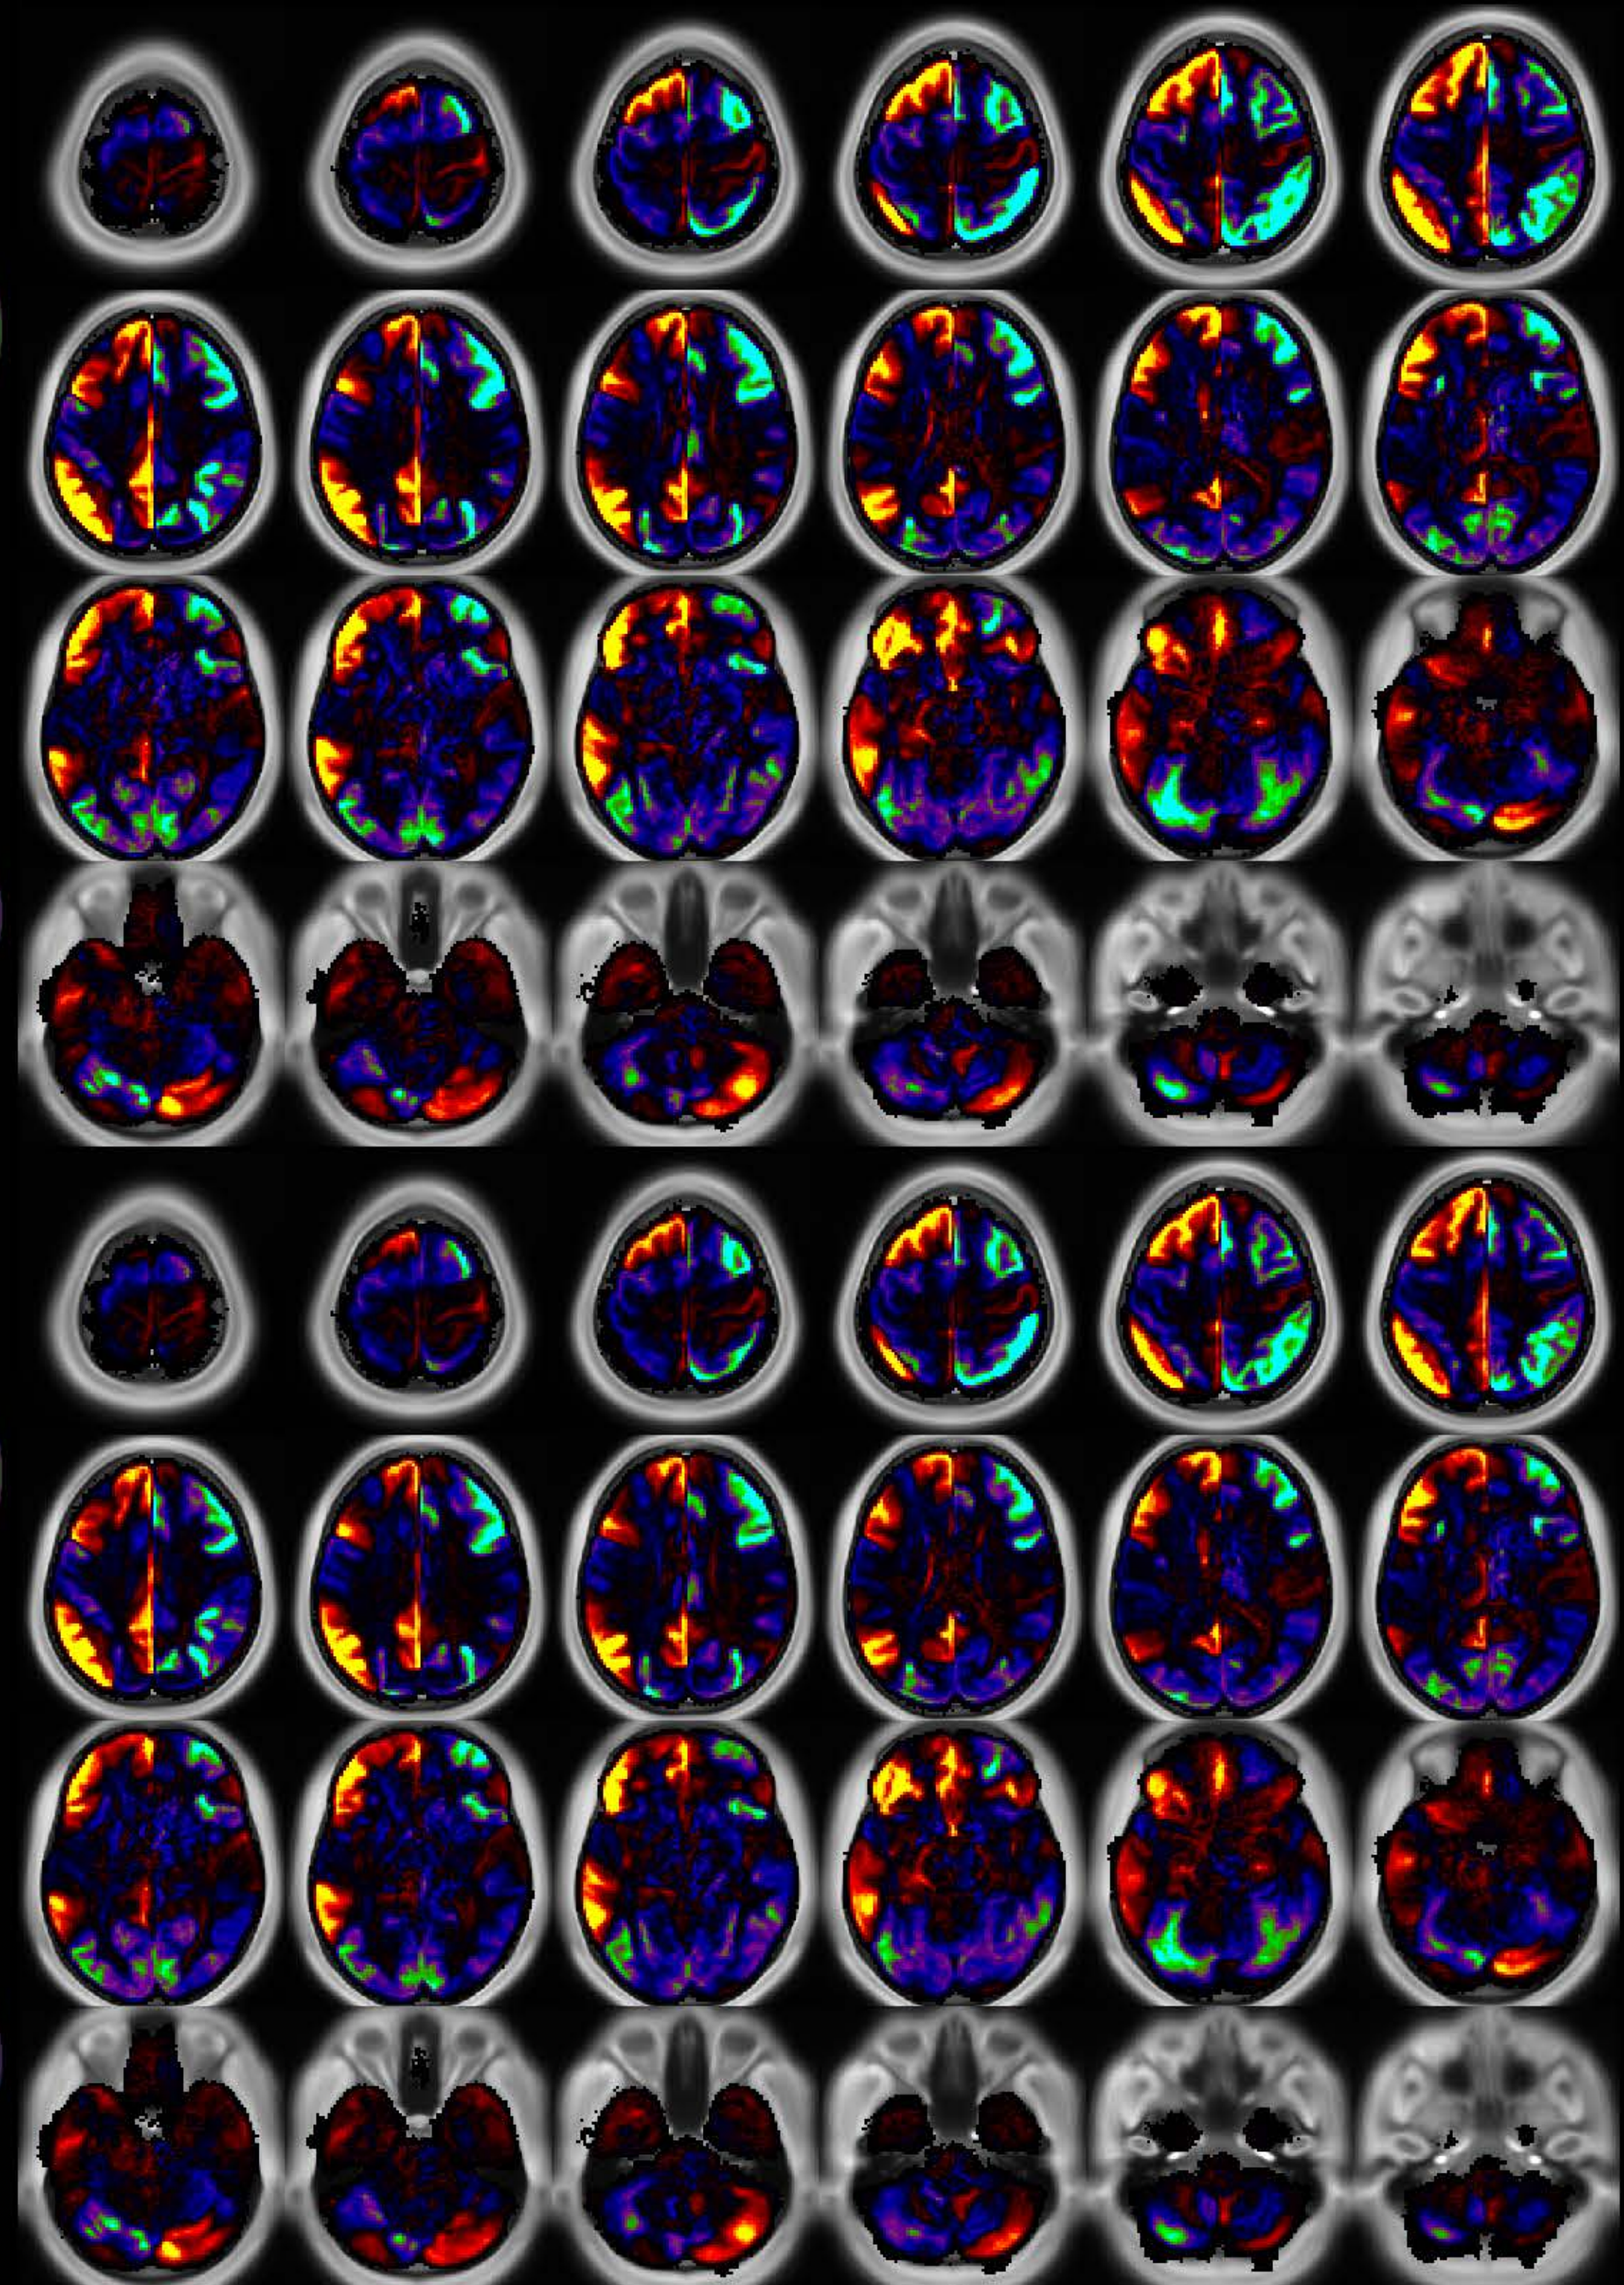

Seconds

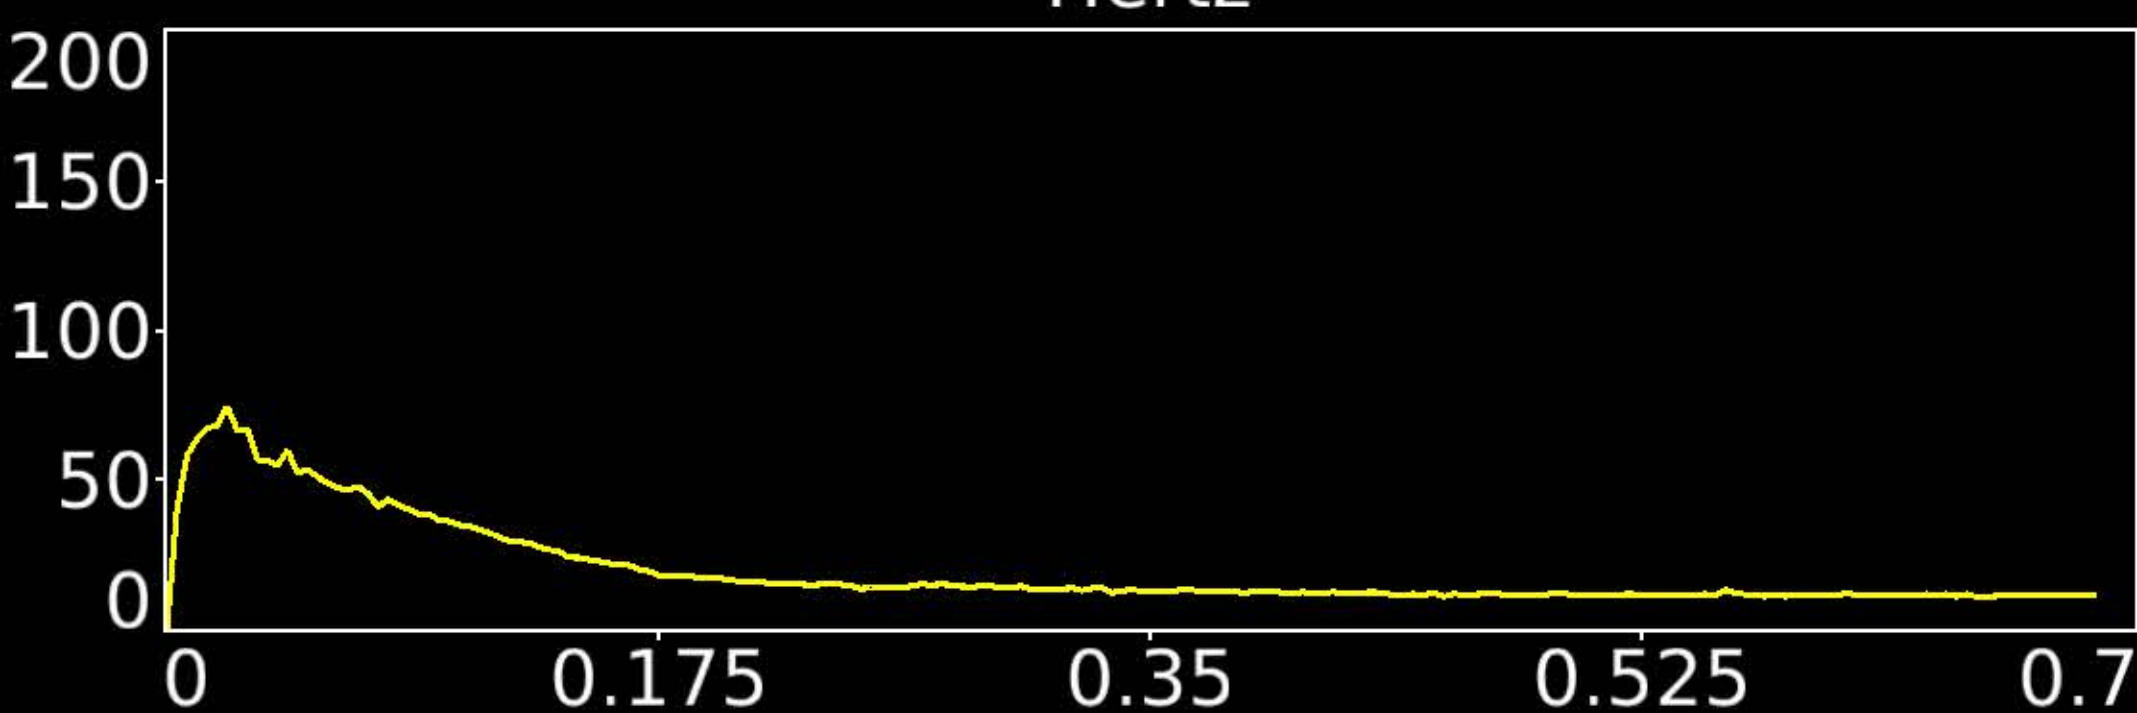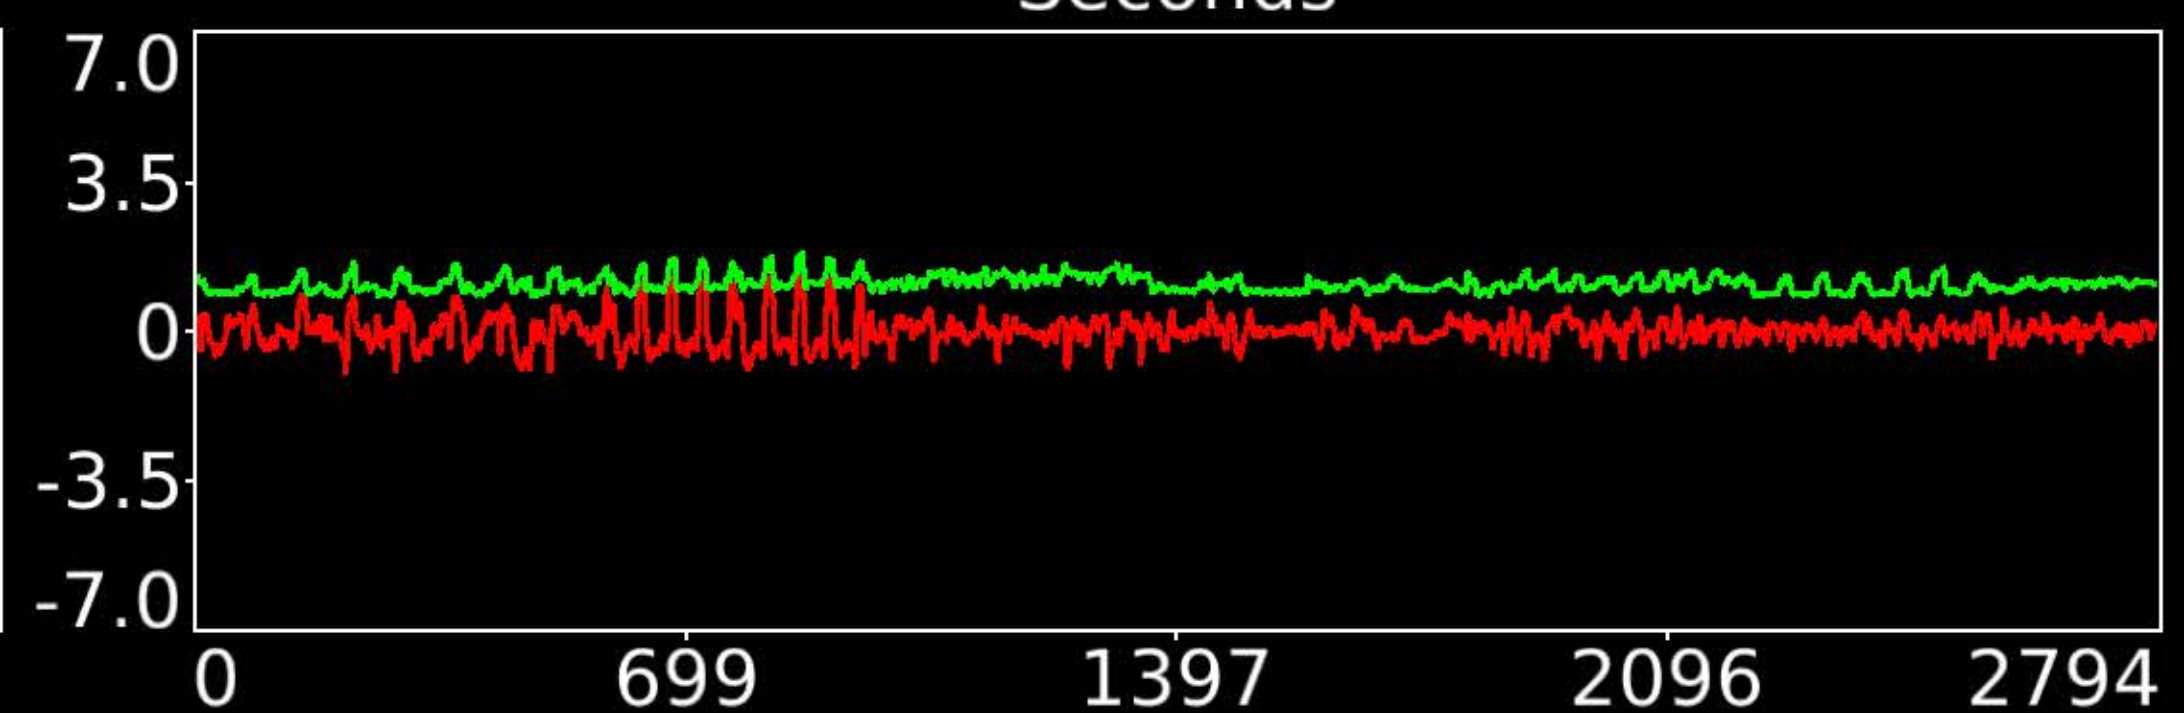

|                           |                            |                                          |  |
|---------------------------|----------------------------|------------------------------------------|--|
| Number & Class: 12 Signal |                            | Name: L Default Mode > R Fronto-parietal |  |
| RVT Correlated: No        | DVARS Dip Associated: No   | Cross-Subject Variable: No               |  |
| Single Subject: No        | % Variance Explained: 2.11 | Globality Index: 0.56                    |  |
| Rest Component: No        | Taskr Component: -6        | Task Modulated: No                       |  |

Rationale: Spatial map includes positive and negative patches that respect known RSNs (e.g. Default Mode Network and Fronto-parietal Network)



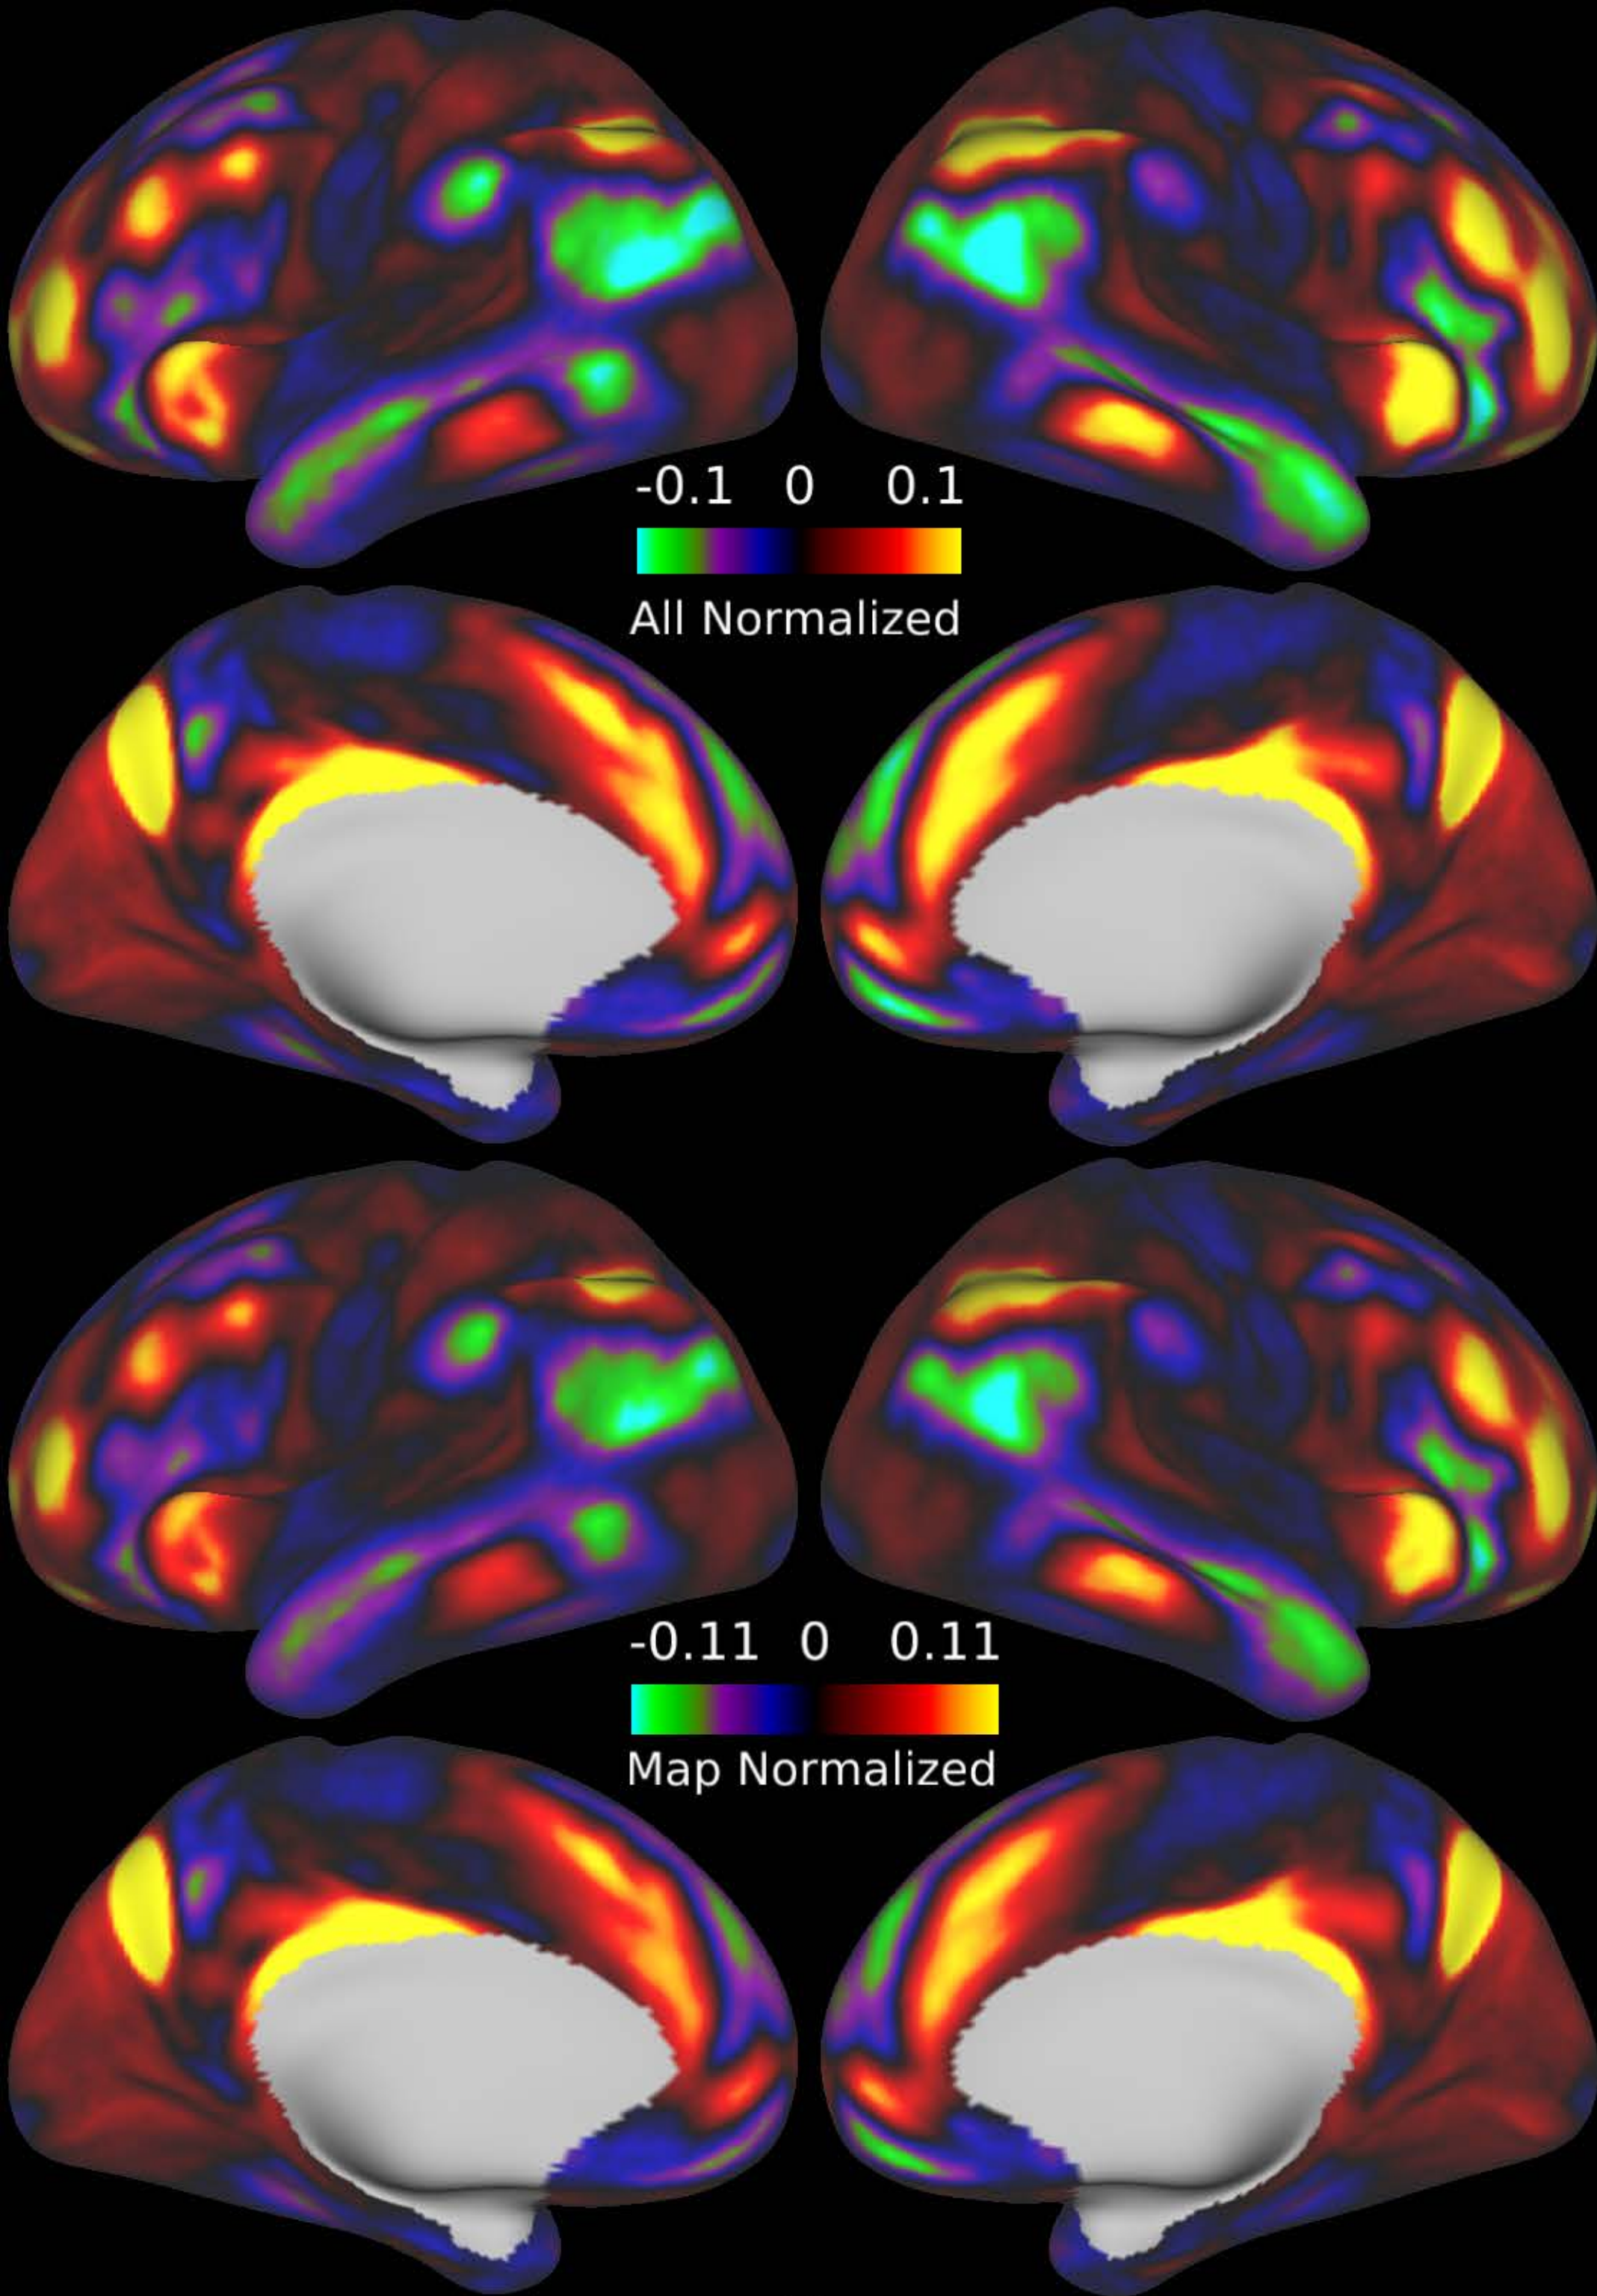

Hertz

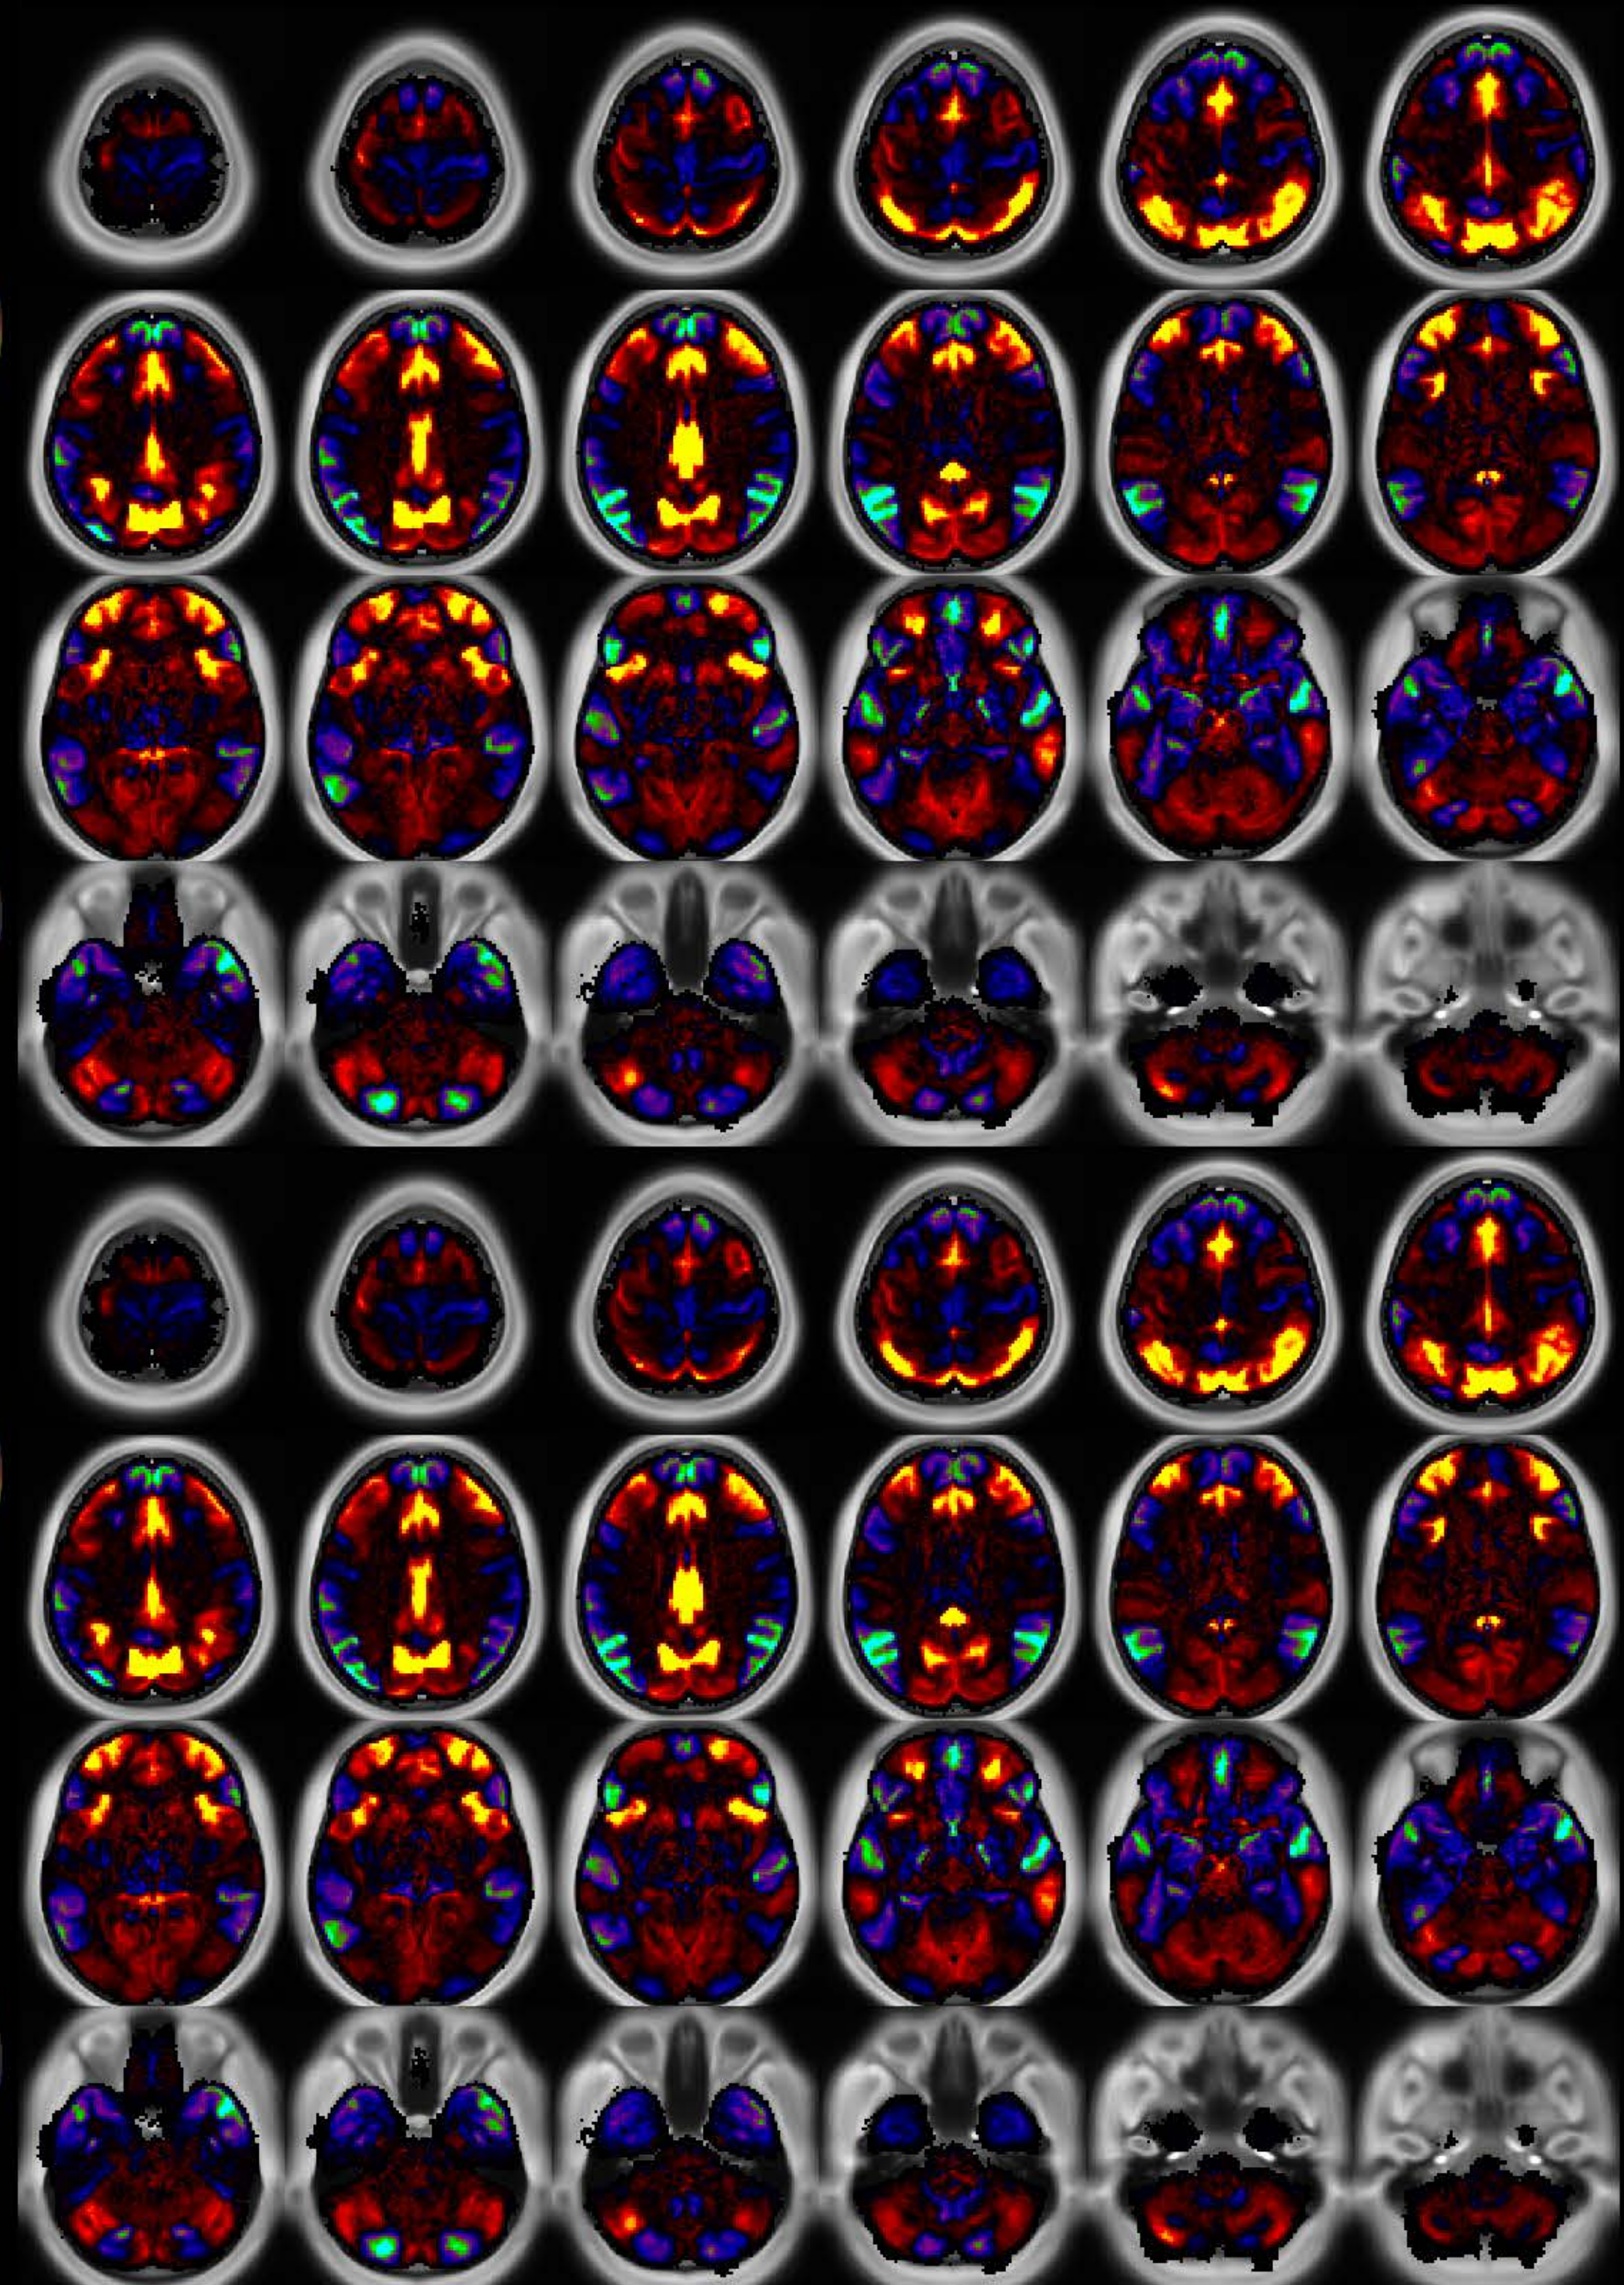

Seconds

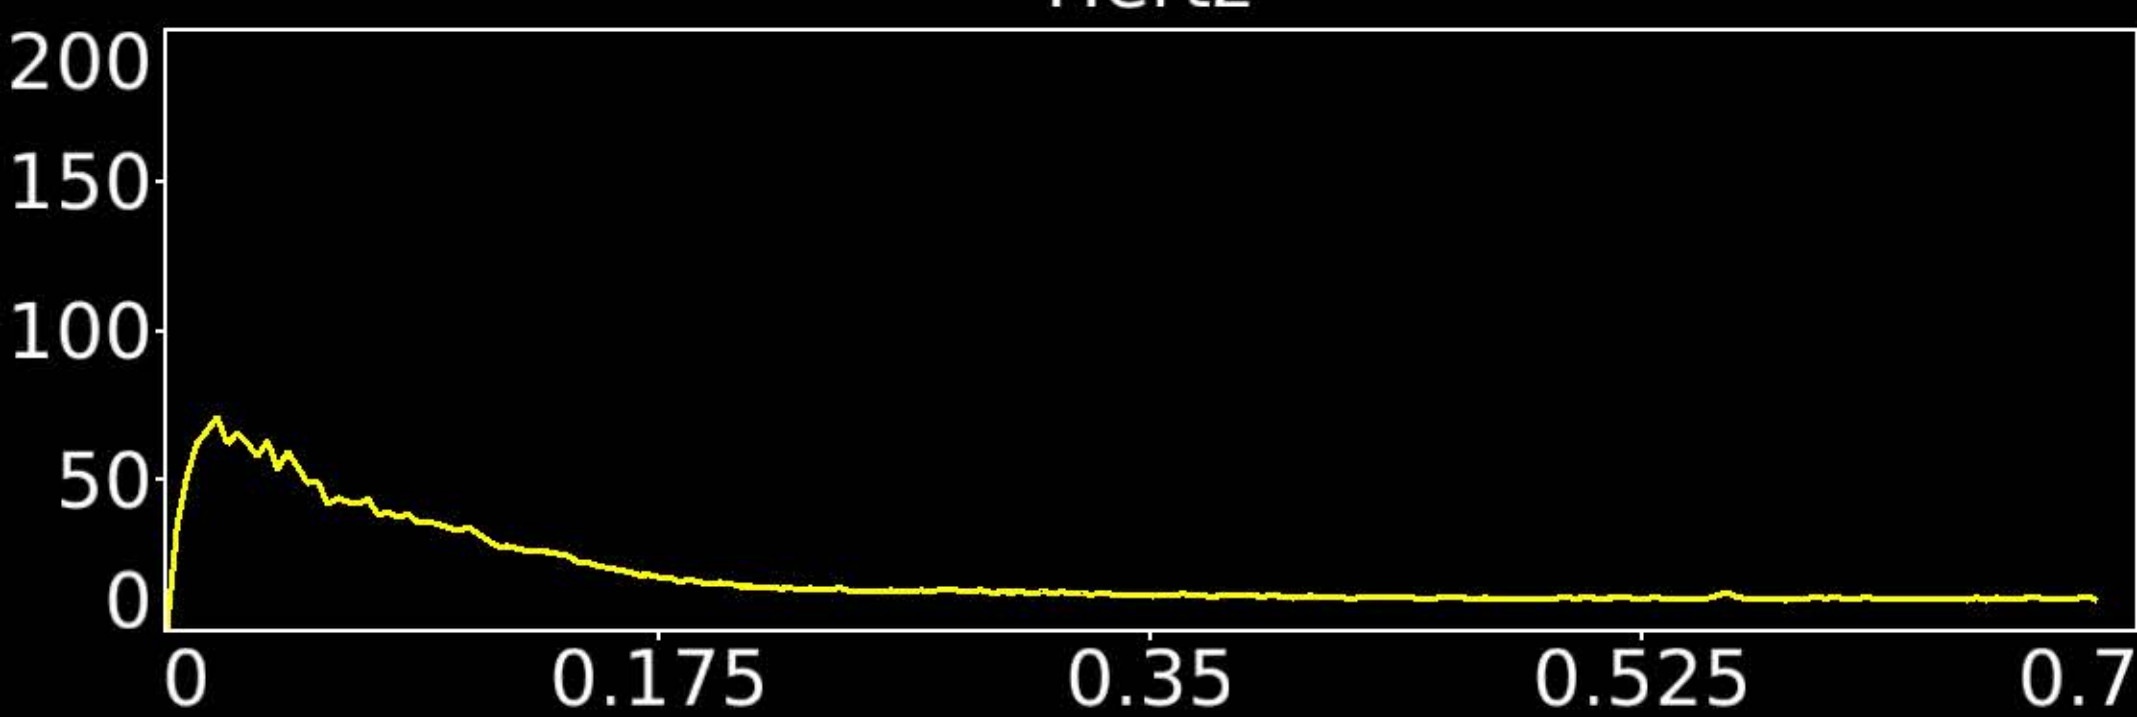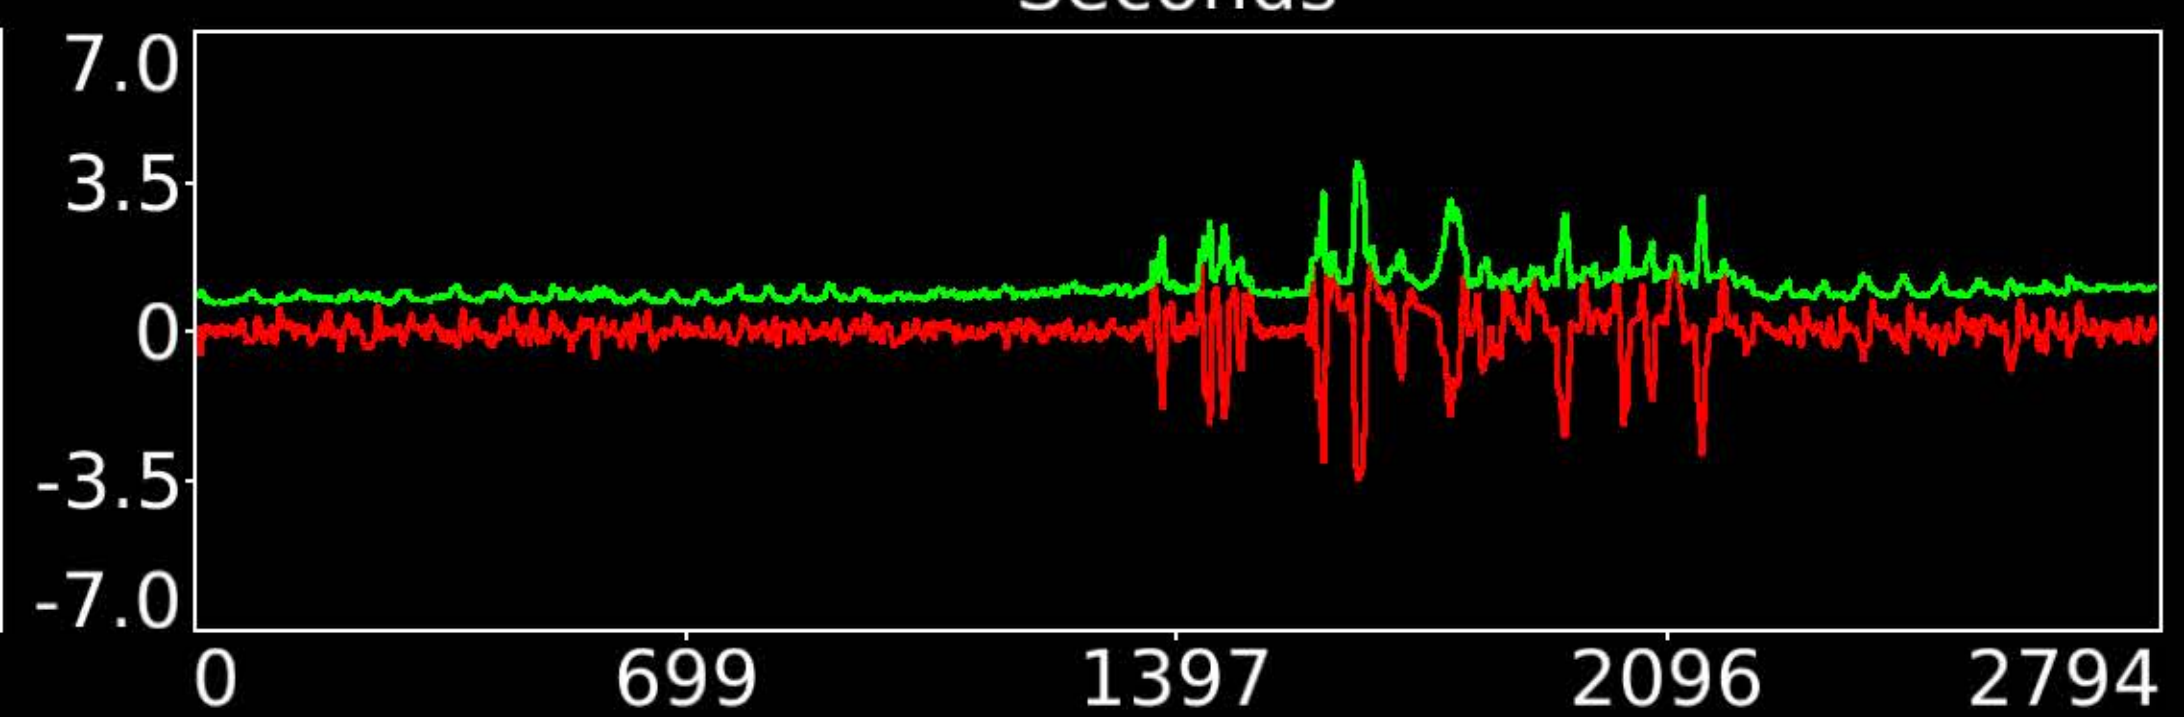

|                                                                                                                  |                            |                                   |  |
|------------------------------------------------------------------------------------------------------------------|----------------------------|-----------------------------------|--|
| Number & Class: 13 Signal                                                                                        |                            | Name: POS2 + RSC vs Unknown       |  |
| RVT Correlated: No                                                                                               | DVARS Dip Associated: No   | Cross-Subject Variable: No        |  |
| Single Subject: No                                                                                               | % Variance Explained: 2.08 | Globality Index: 0.59             |  |
| Rest Component: 37                                                                                               | Taskr Component: 21        | Task Modulated: Language + Social |  |
| Rationale: Spatial map includes positive and negative patches that are correlated with two specific task designs |                            |                                   |  |



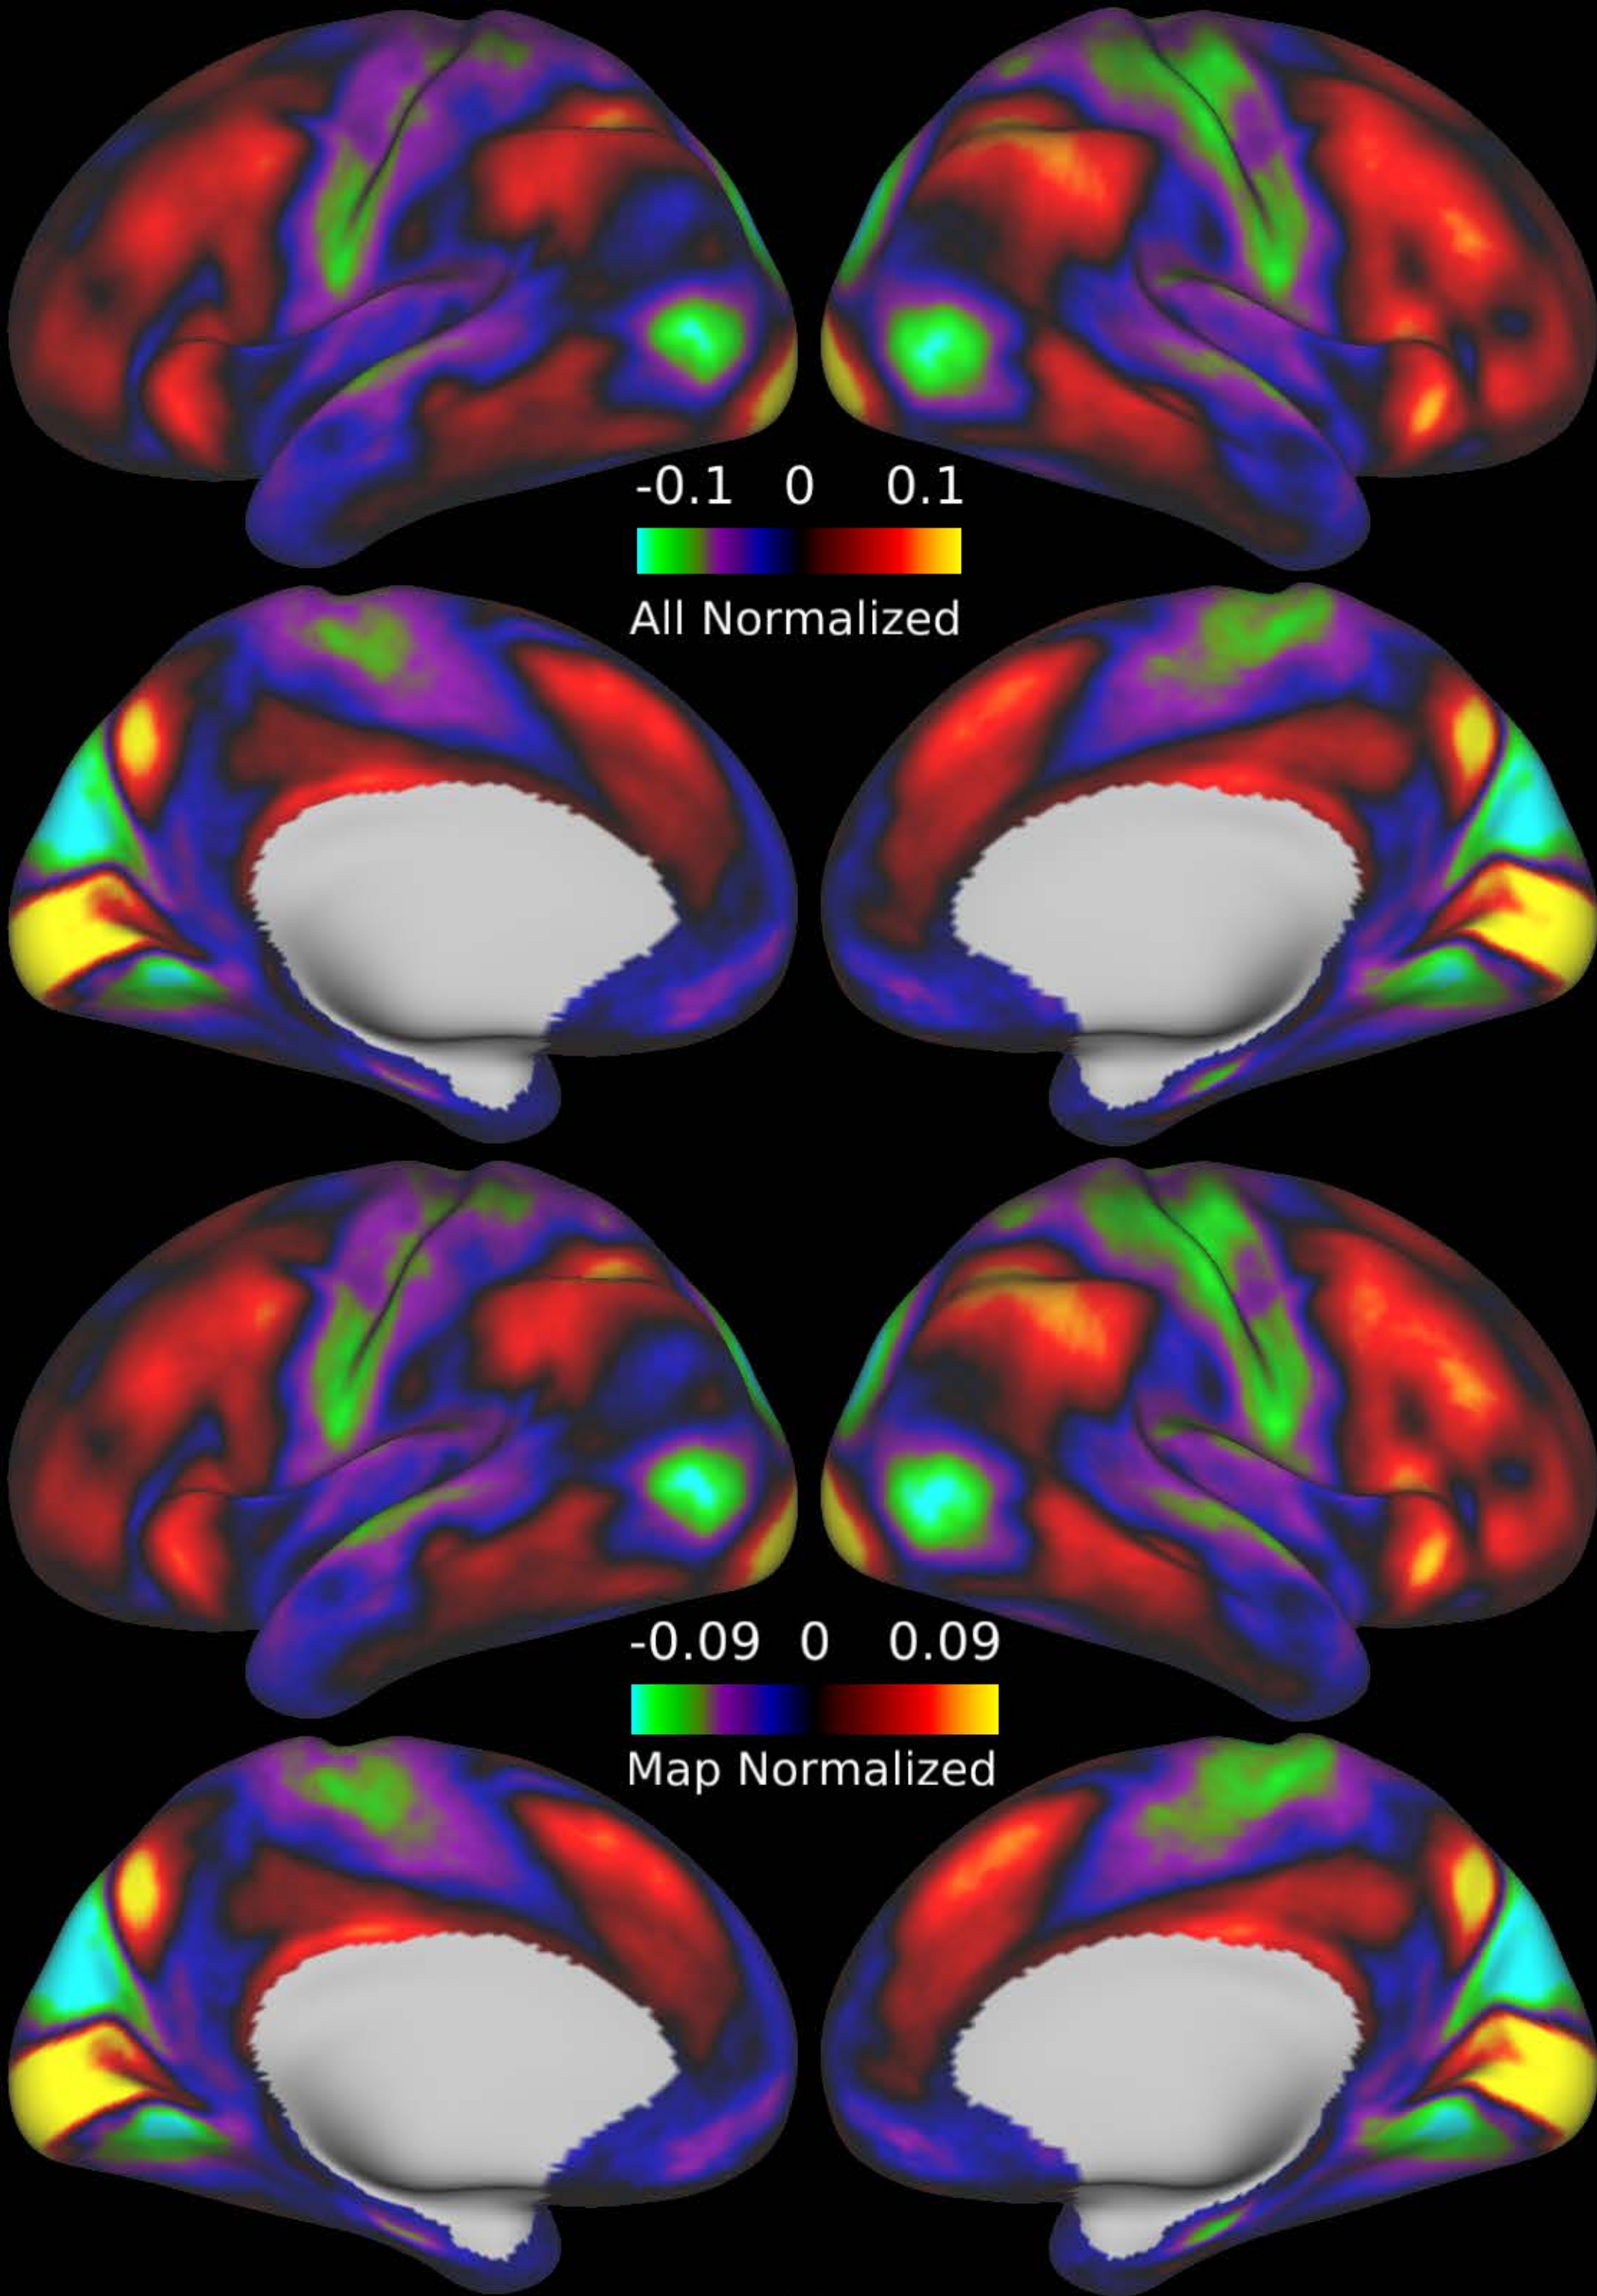

Hertz

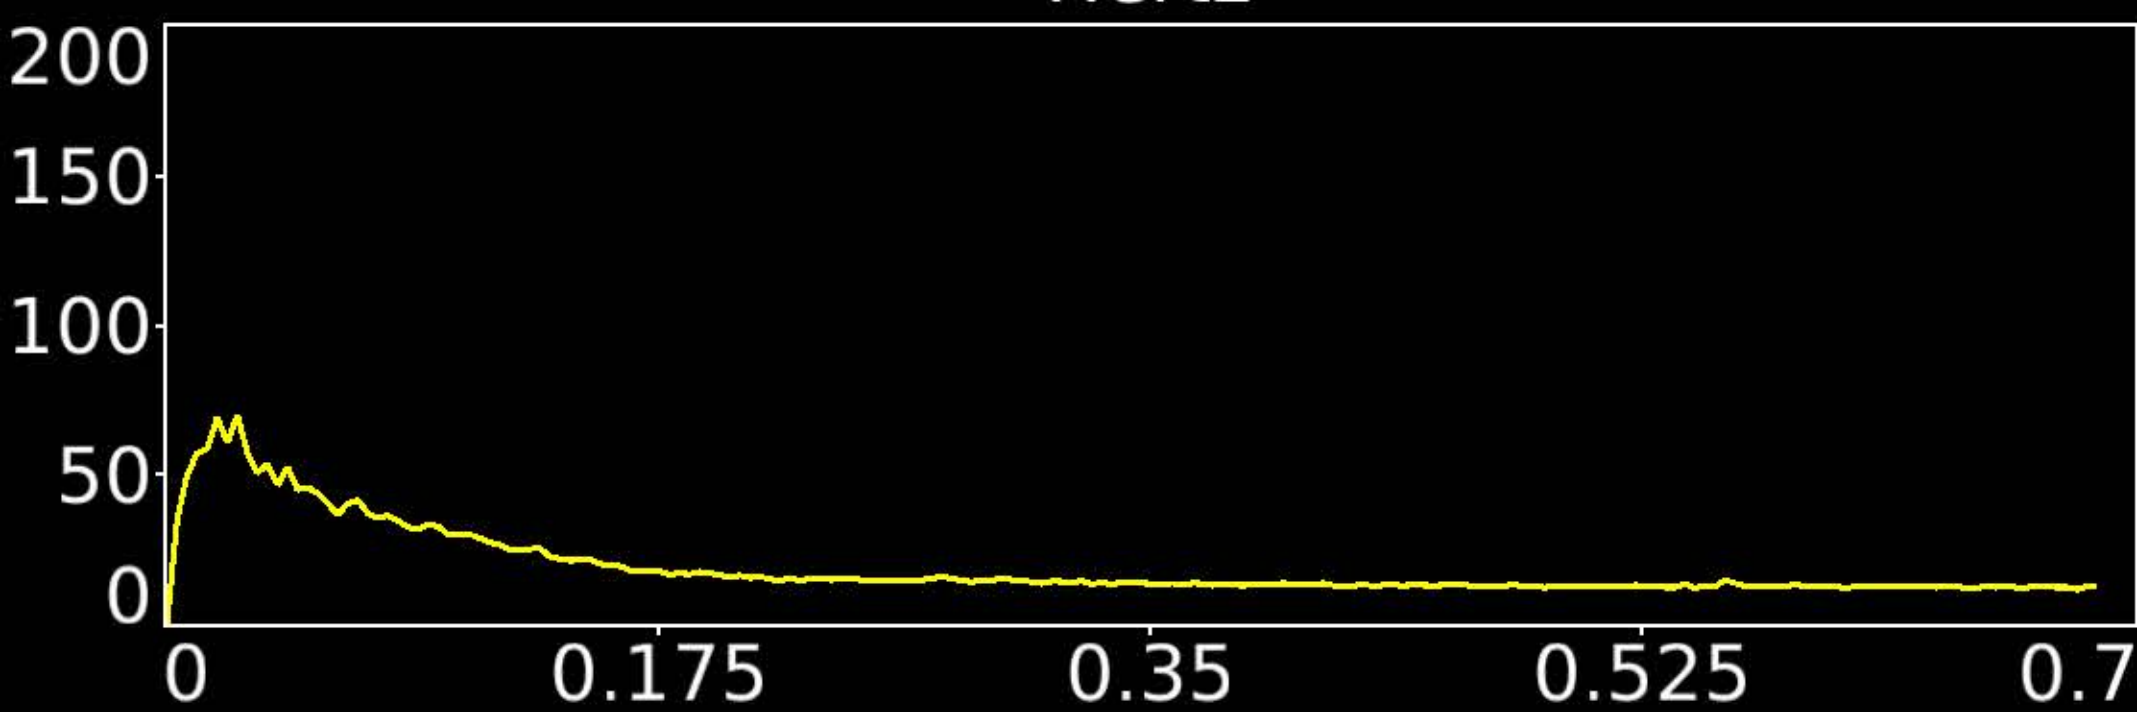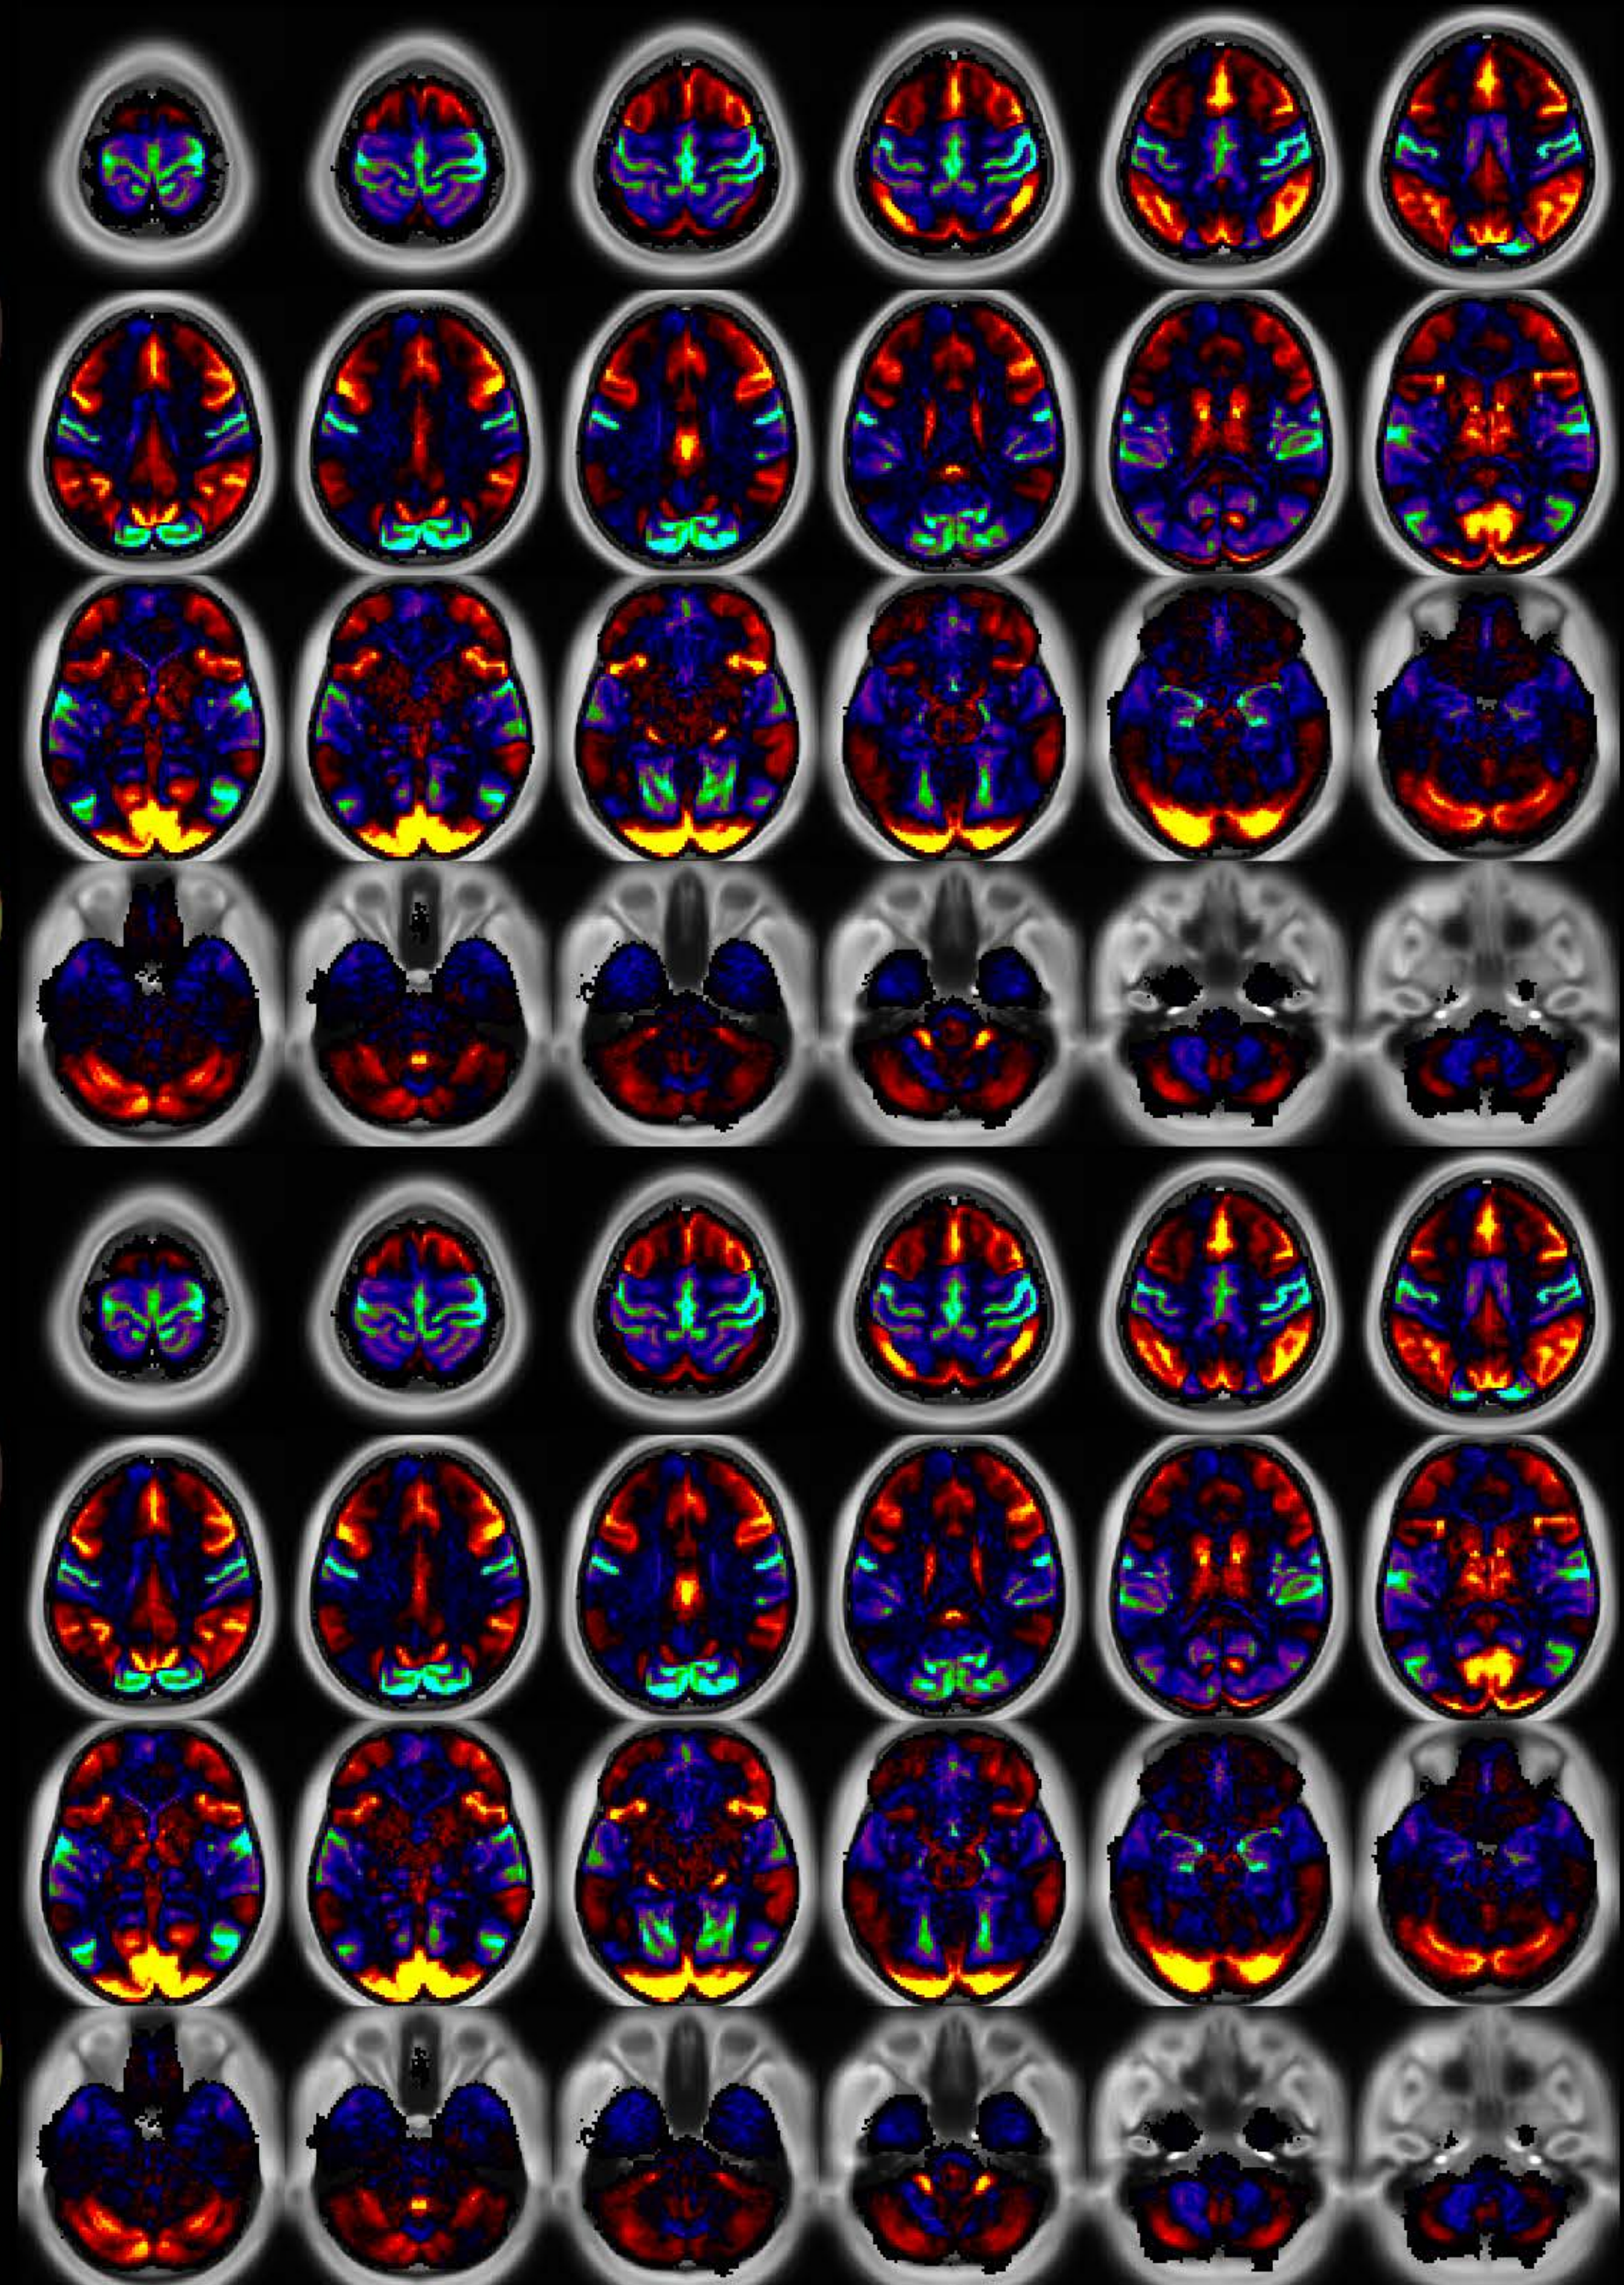

Seconds

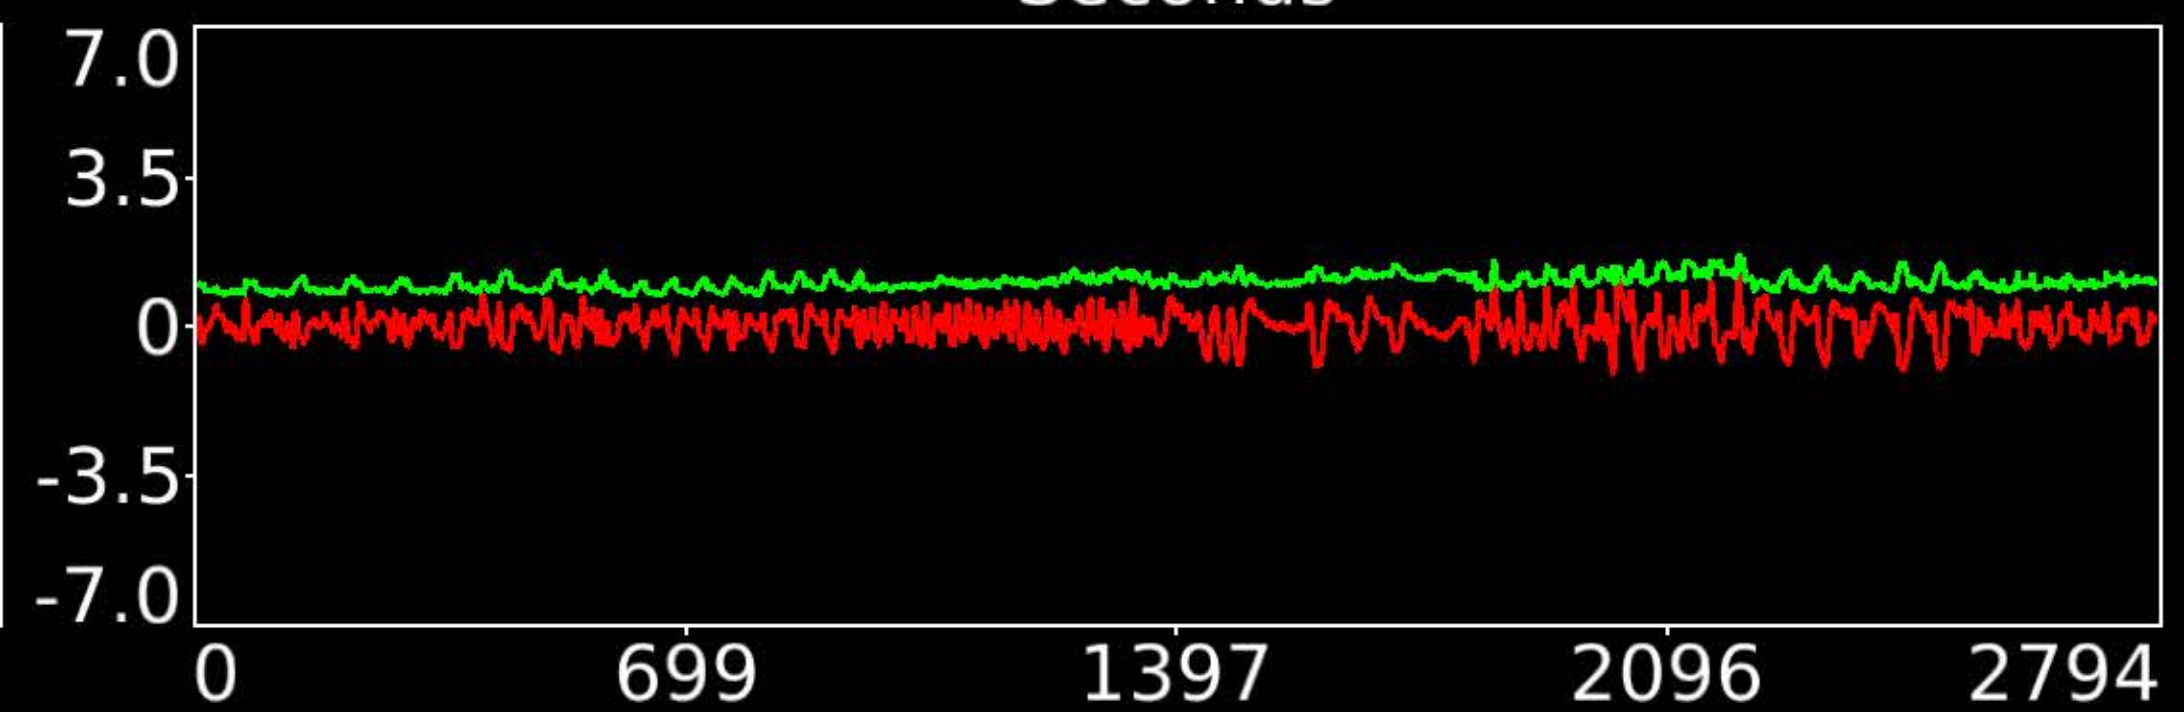

|                           |                            |                                    |  |
|---------------------------|----------------------------|------------------------------------|--|
| Number & Class: 14 Signal |                            | Name: LGN to V1 Variable Component |  |
| RVT Correlated: No        | DVARS Dip Associated: No   | Cross-Subject Variable: Yes        |  |
| Single Subject: No        | % Variance Explained: 1.95 | Globality Index: 0.13              |  |
| Rest Component: 2         | Taskr Component: 14        | Task Modulated: No                 |  |

Rationale: Spatial map includes positive and negative patches that respect known areal boundaries (e.g. V1 and V2)



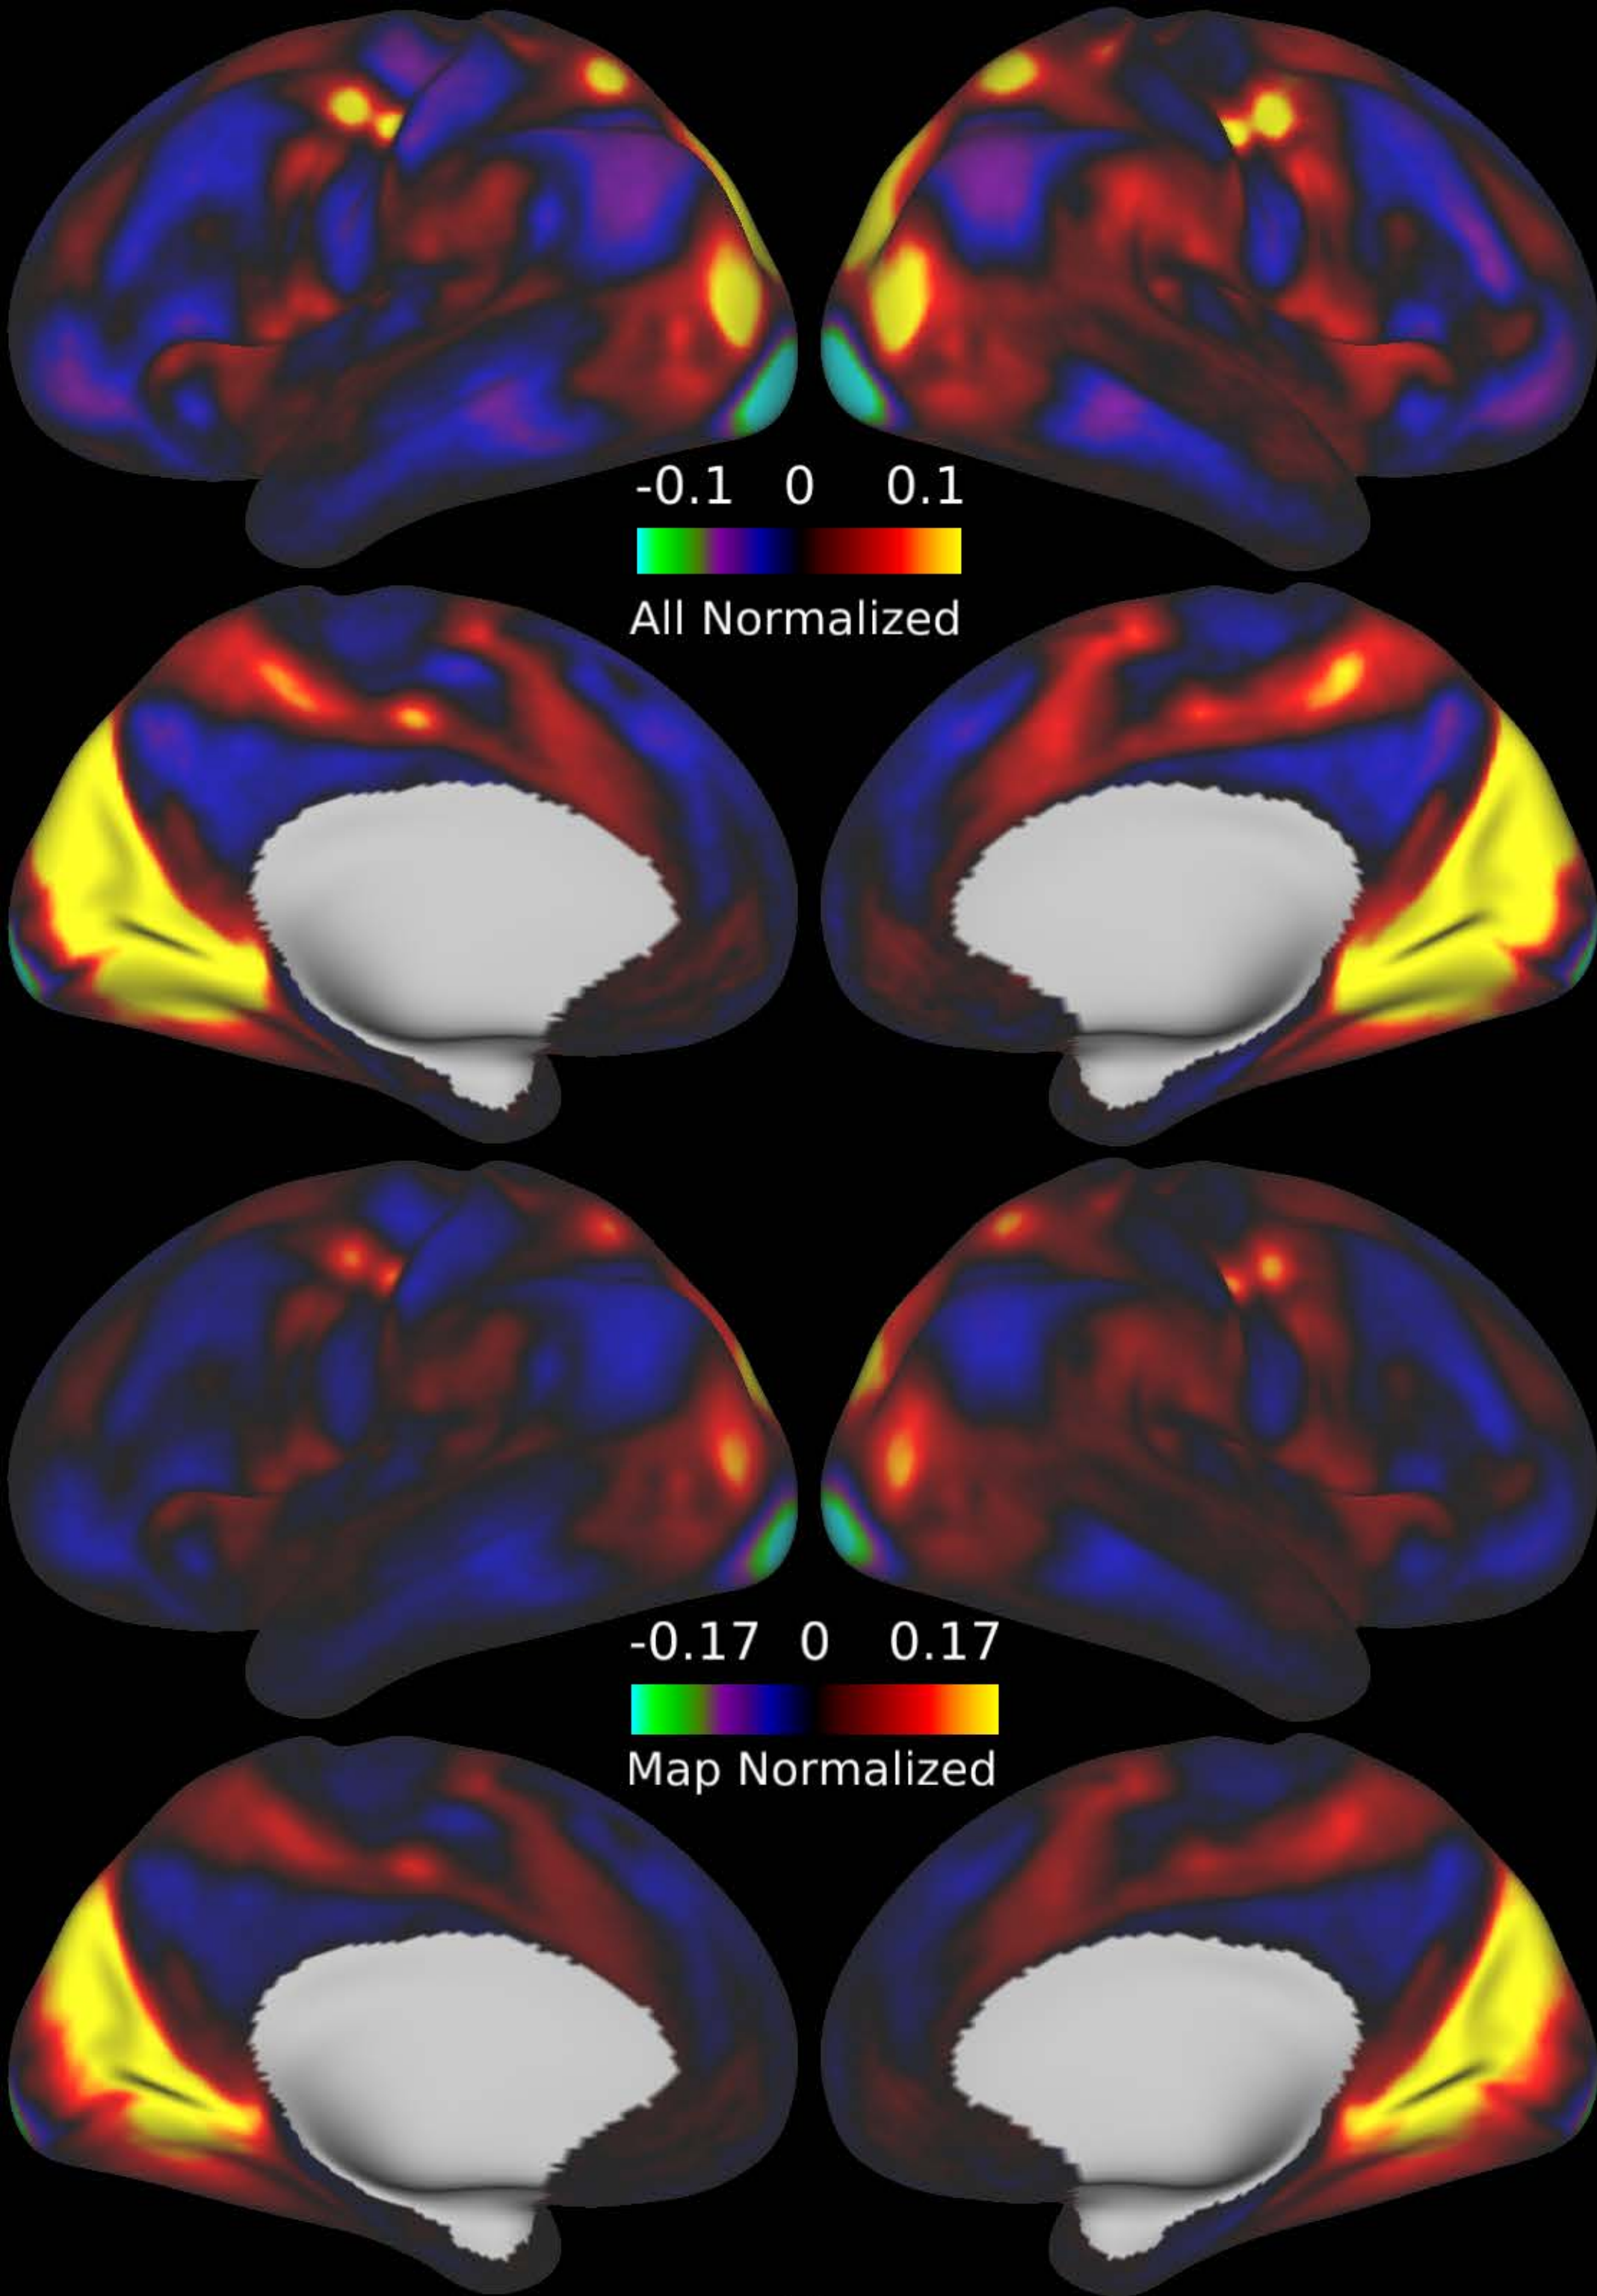

Hertz

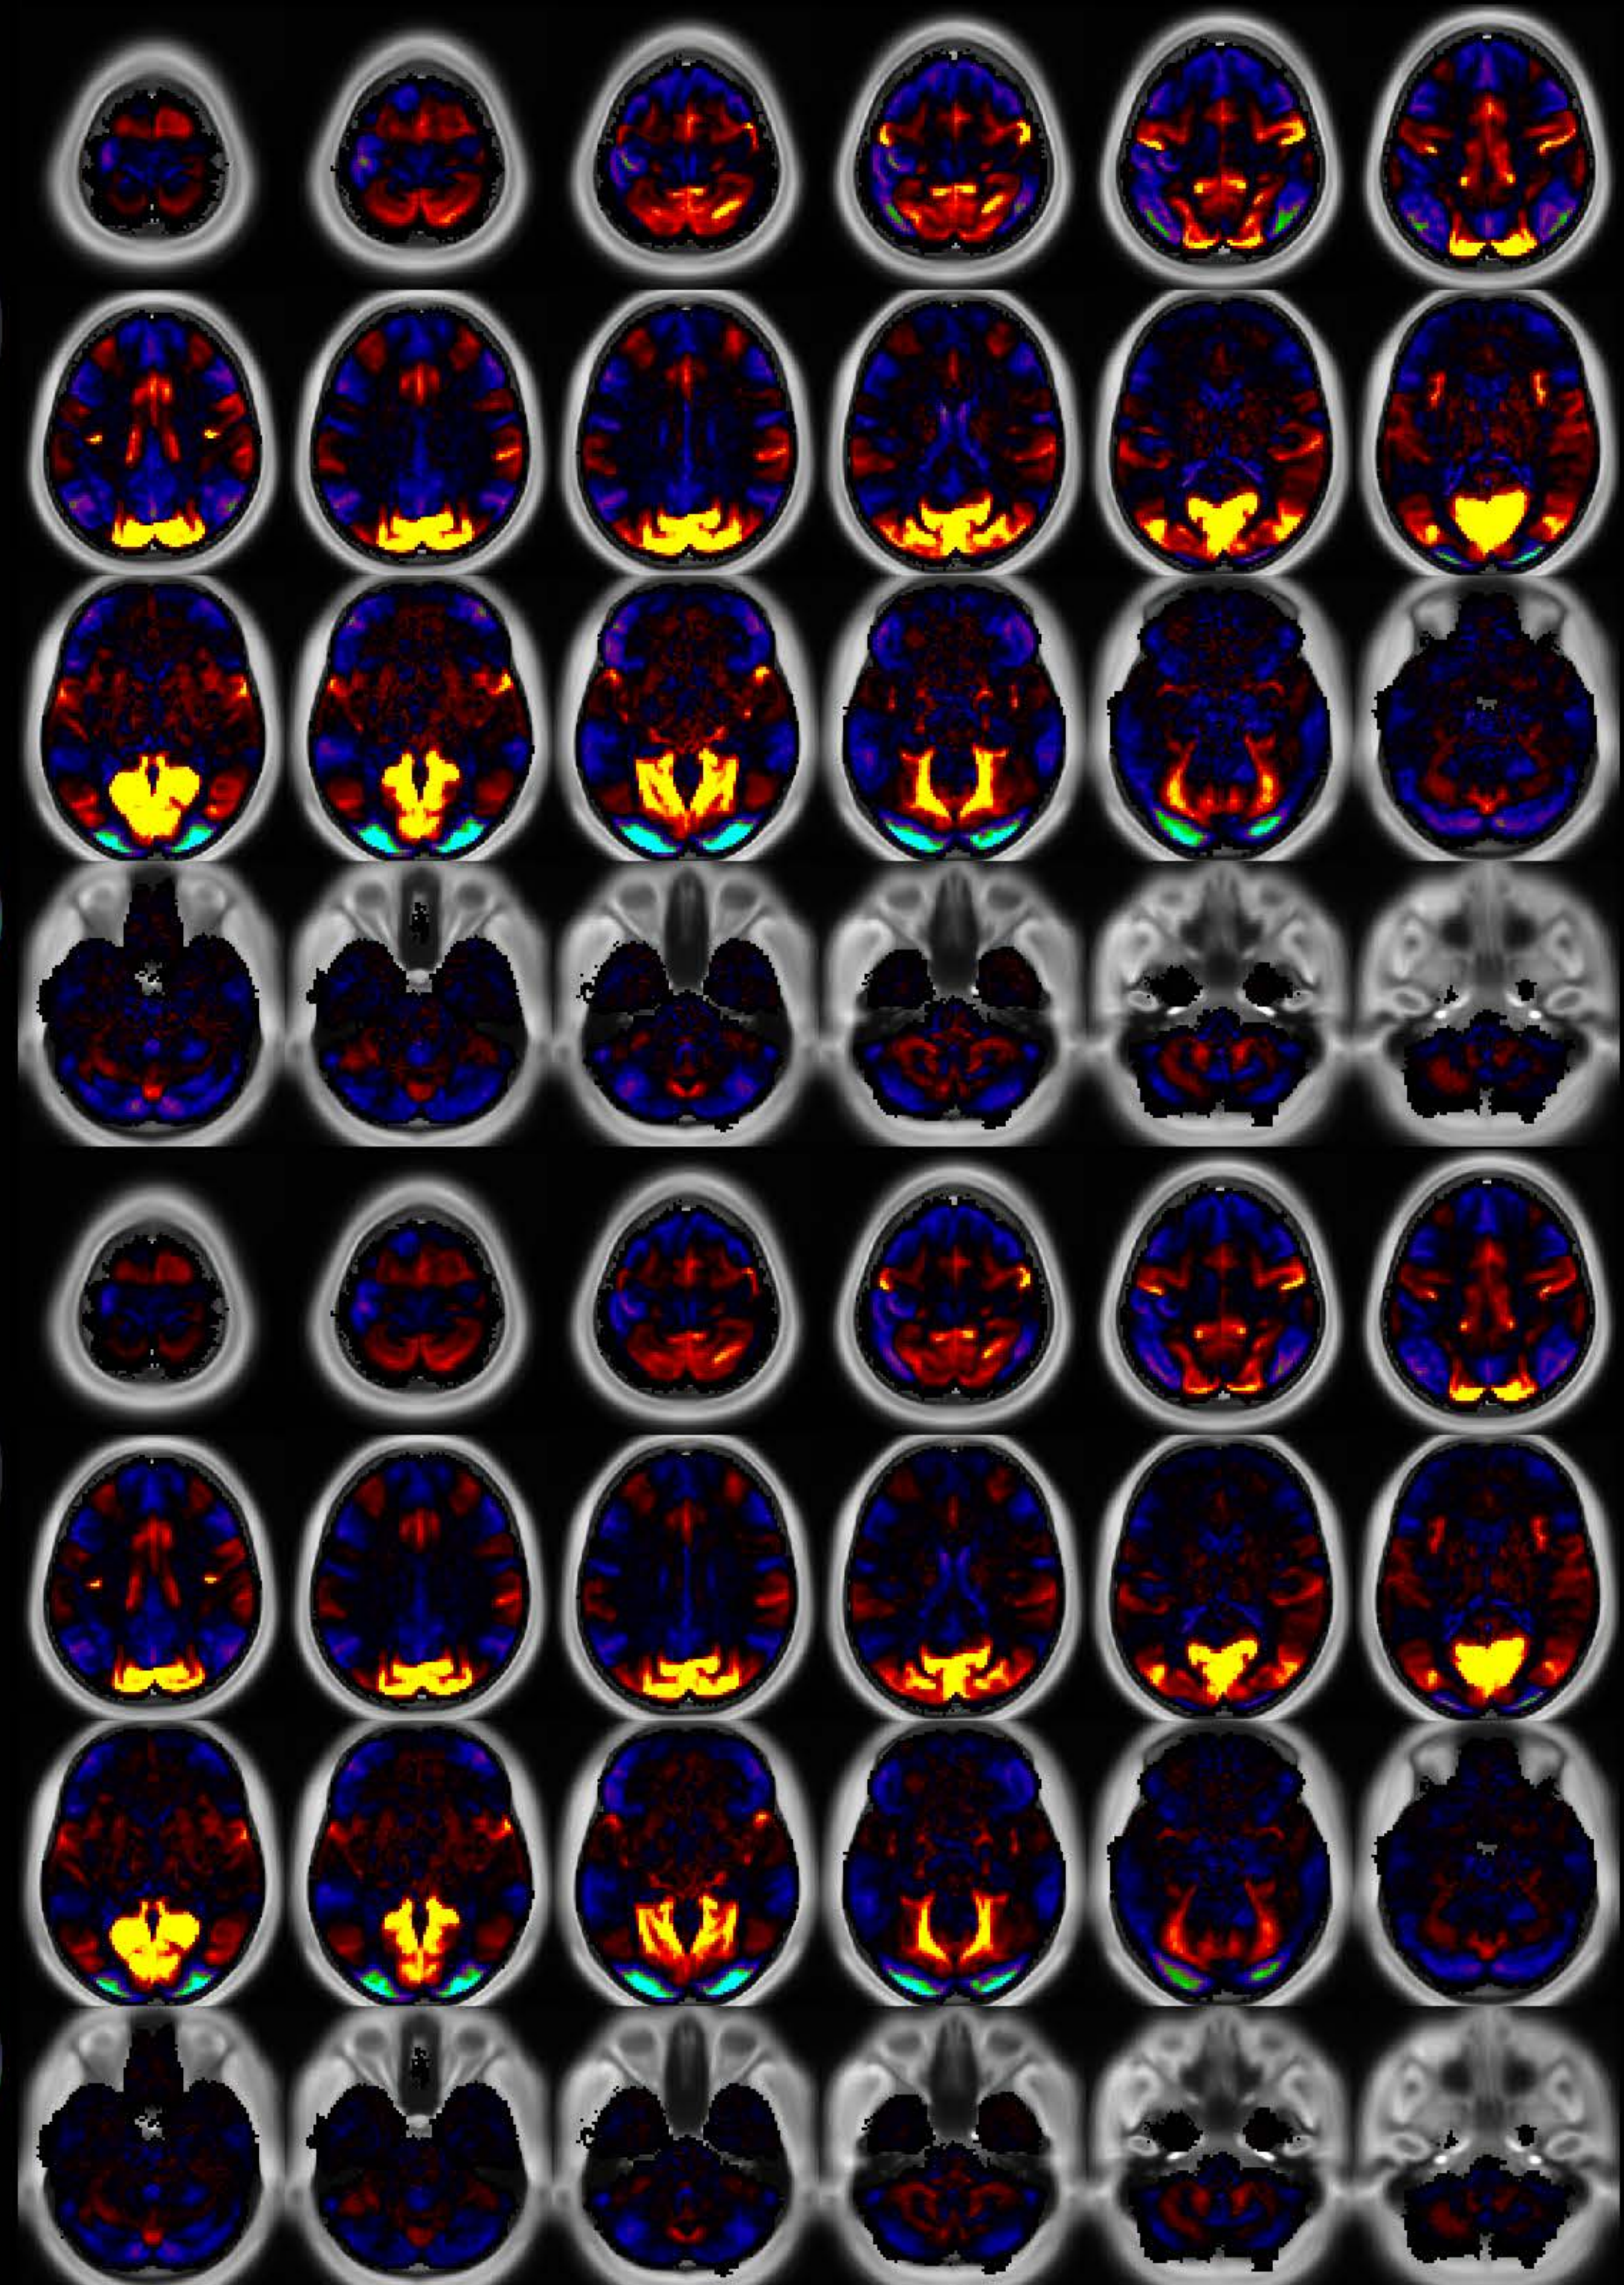

Seconds

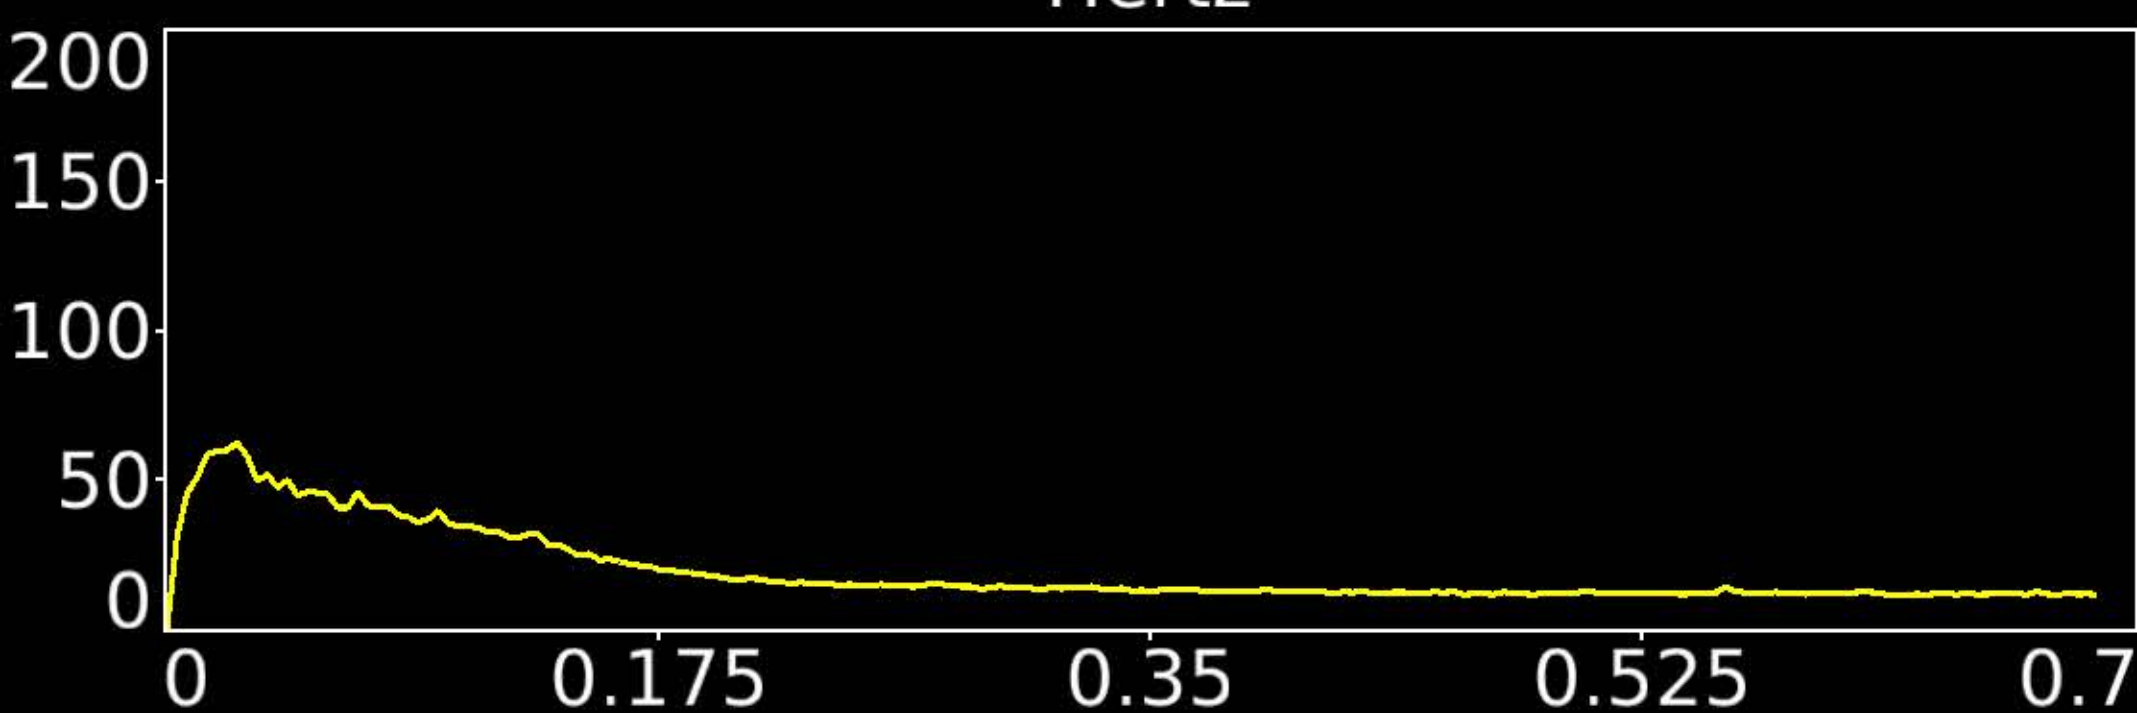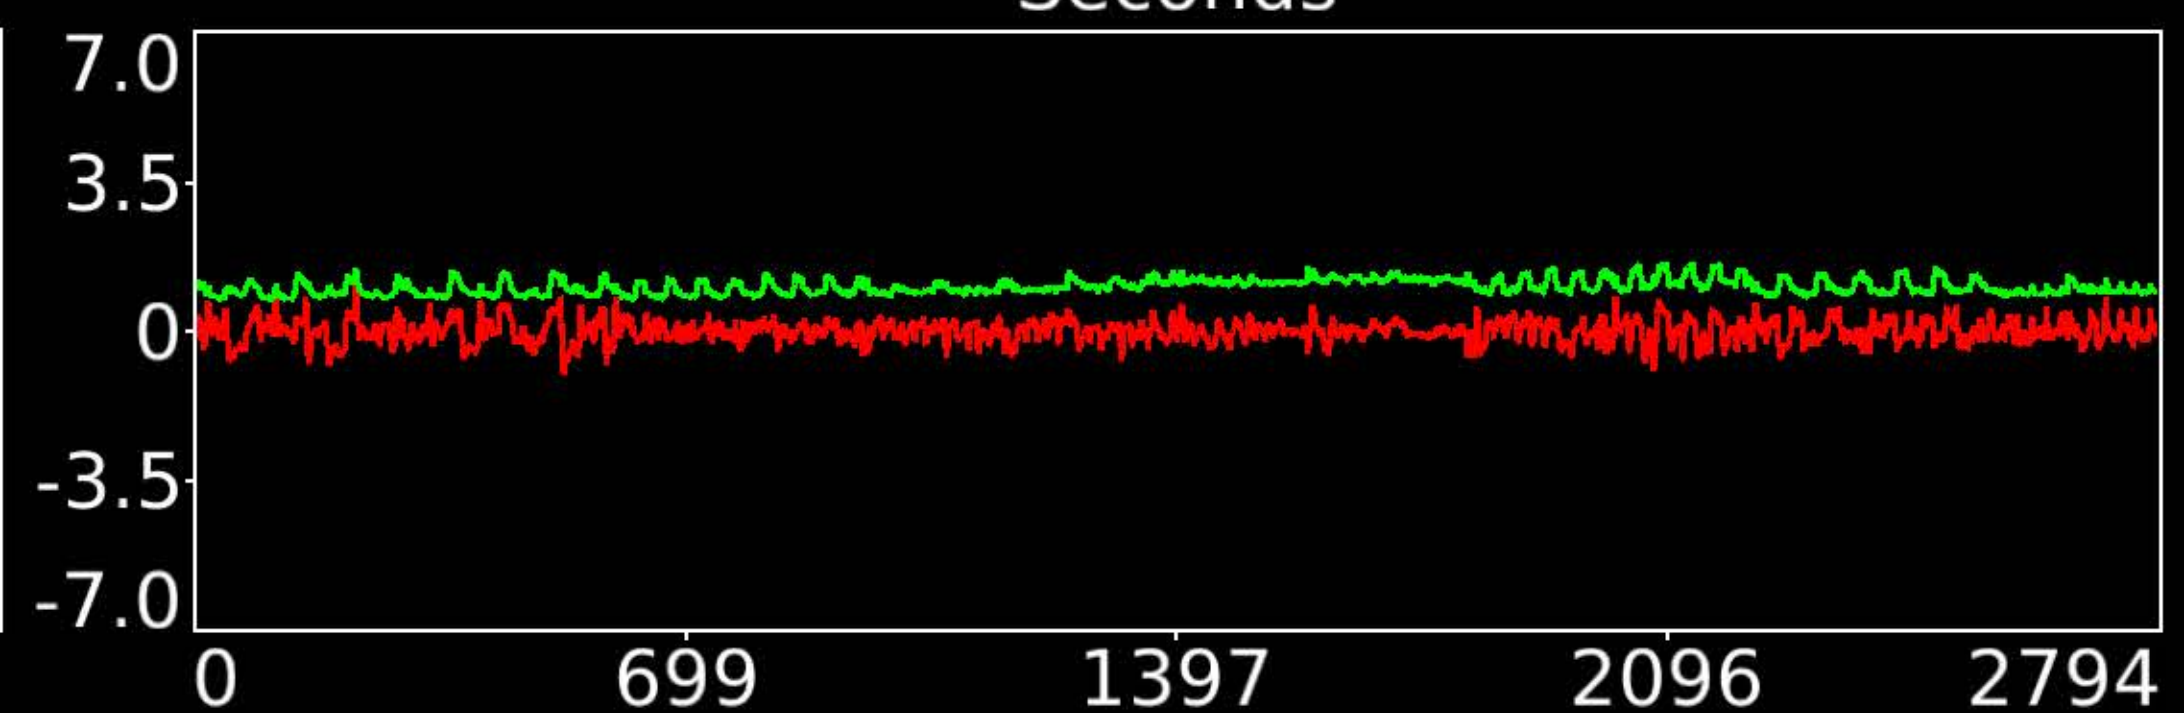

|                           |                            |                                        |  |
|---------------------------|----------------------------|----------------------------------------|--|
| Number & Class: 15 Signal |                            | Name: Pan-Visual (Peripheral > Foveal) |  |
| RVT Correlated: No        | DVARS Dip Associated: No   | Cross-Subject Variable: Yes            |  |
| Single Subject: No        | % Variance Explained: 1.95 | Globality Index: 0.16                  |  |
| Rest Component: No        | Taskr Component: 3         | Task Modulated: No                     |  |

Rationale: Spatial map includes positive and negative patches that respect known retinotopic visual organization (Peripheral vs Foveal)



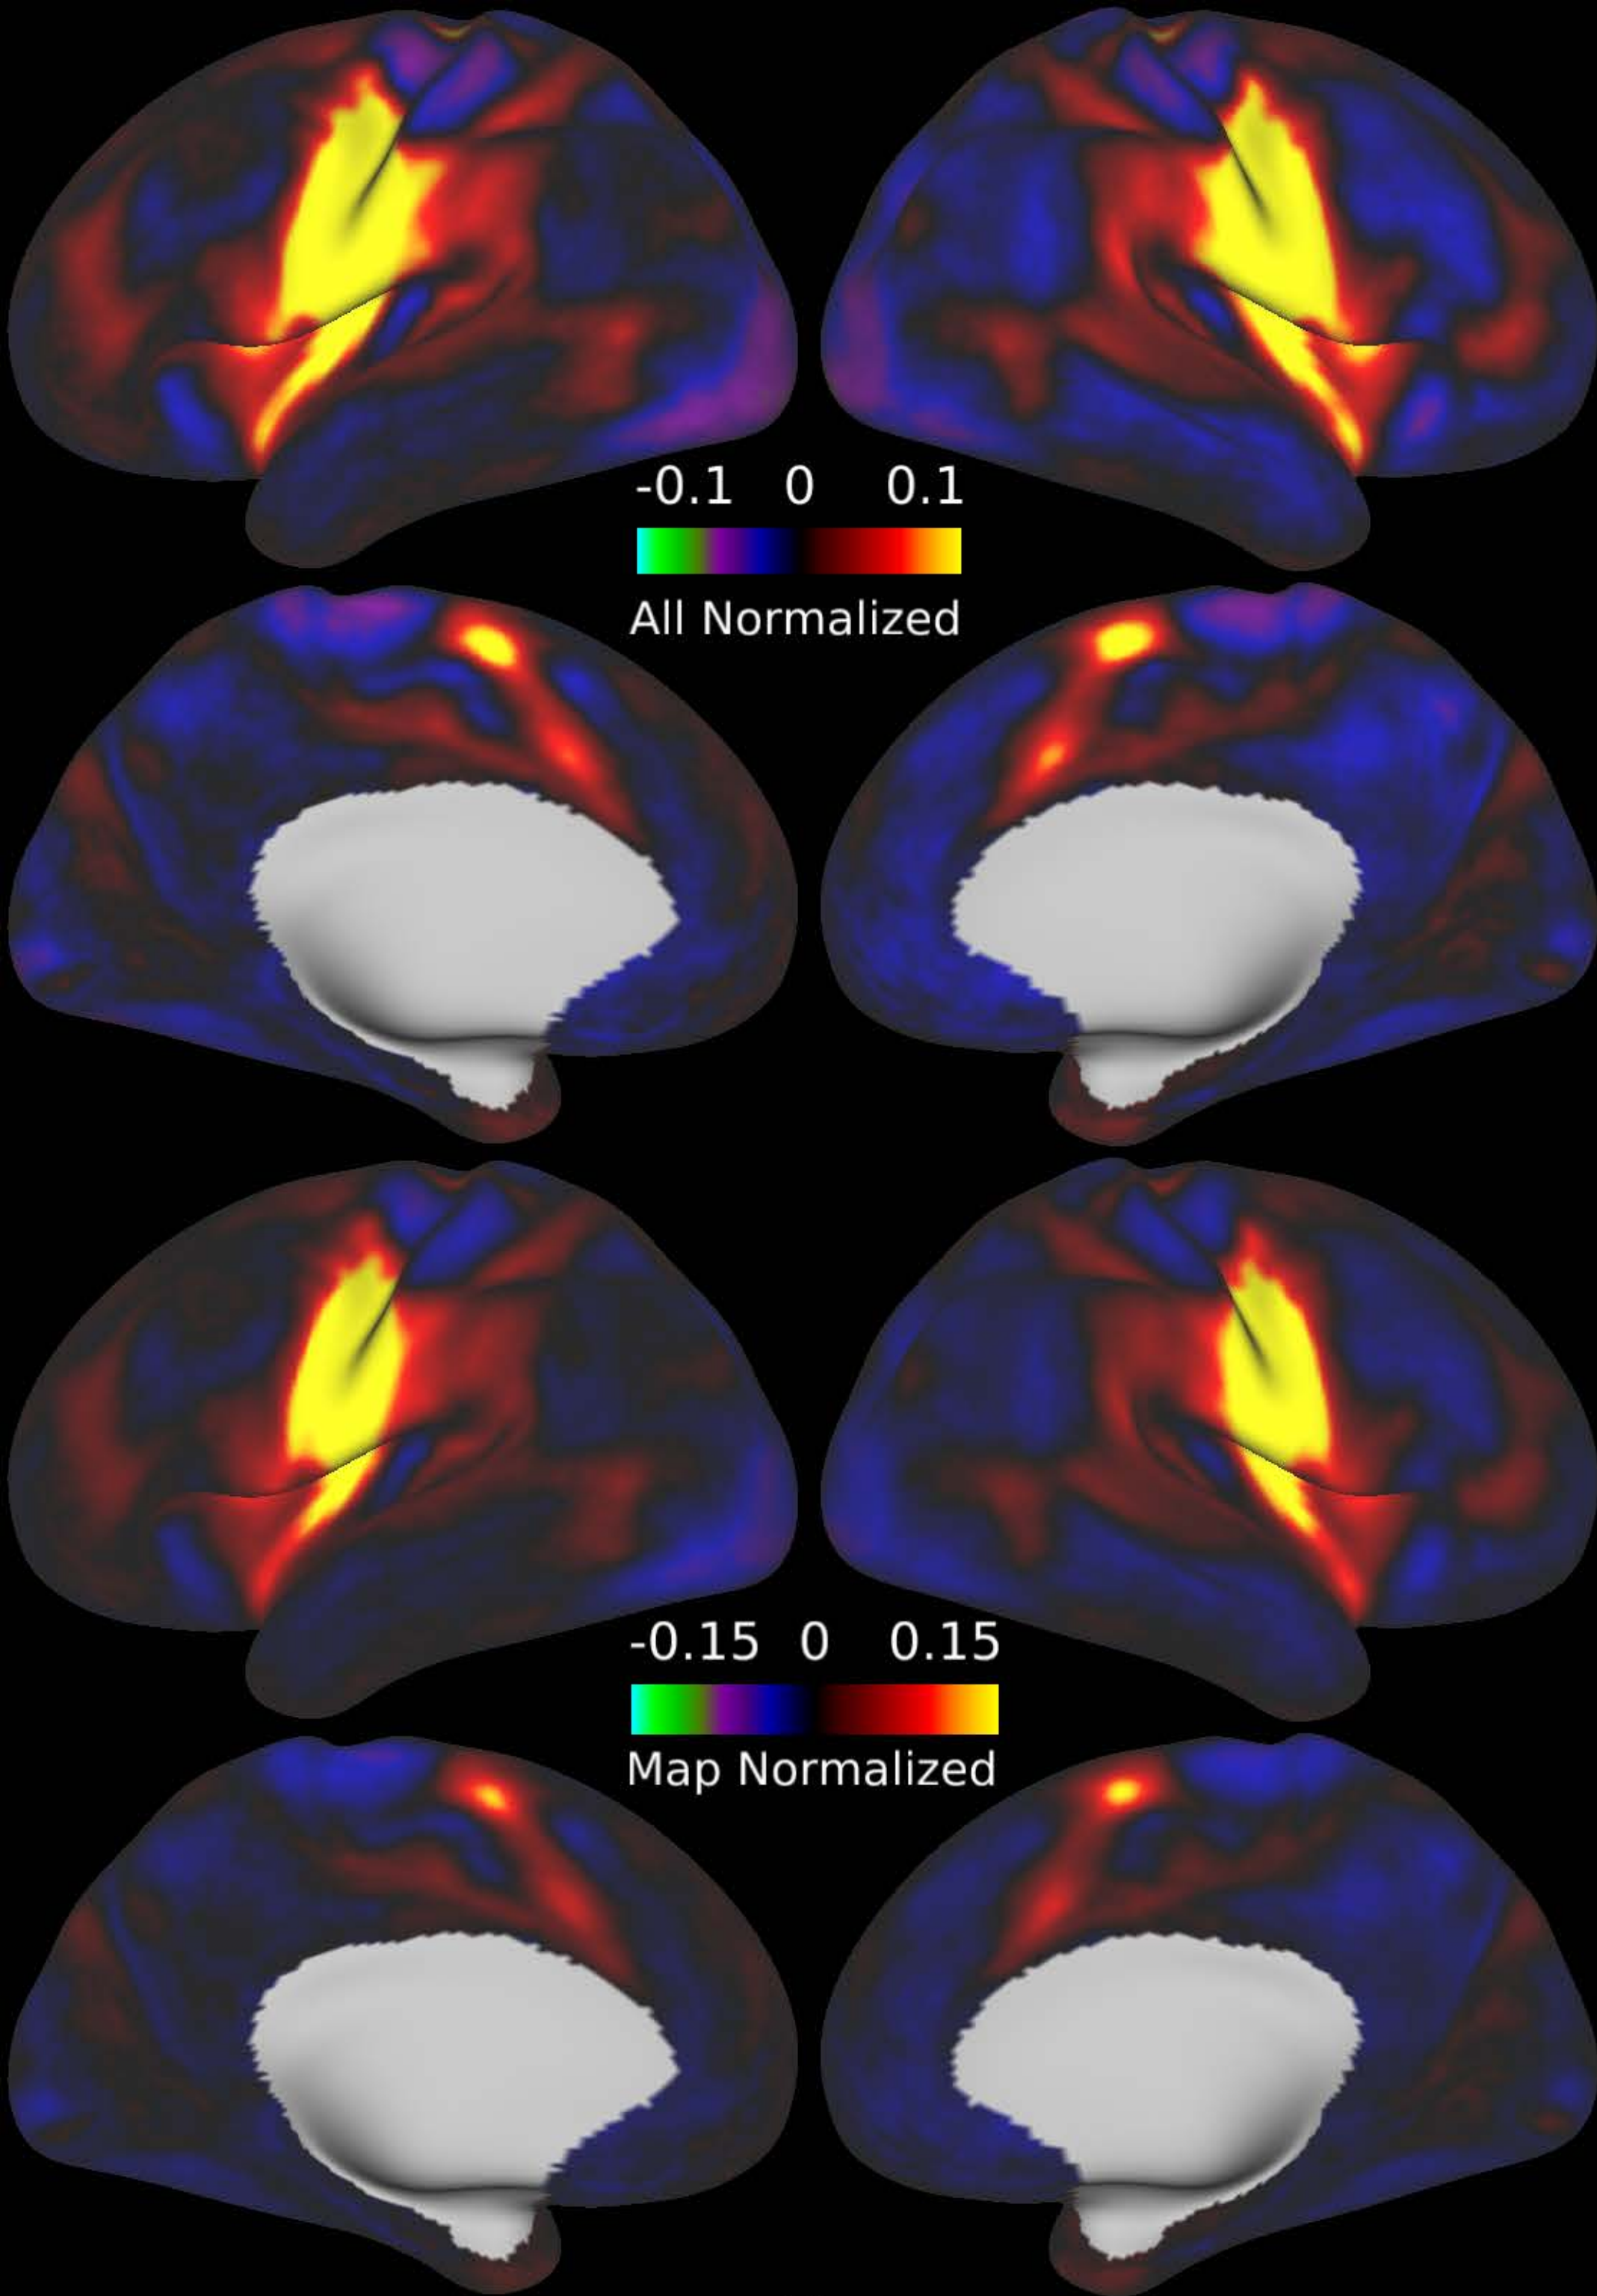

Hertz

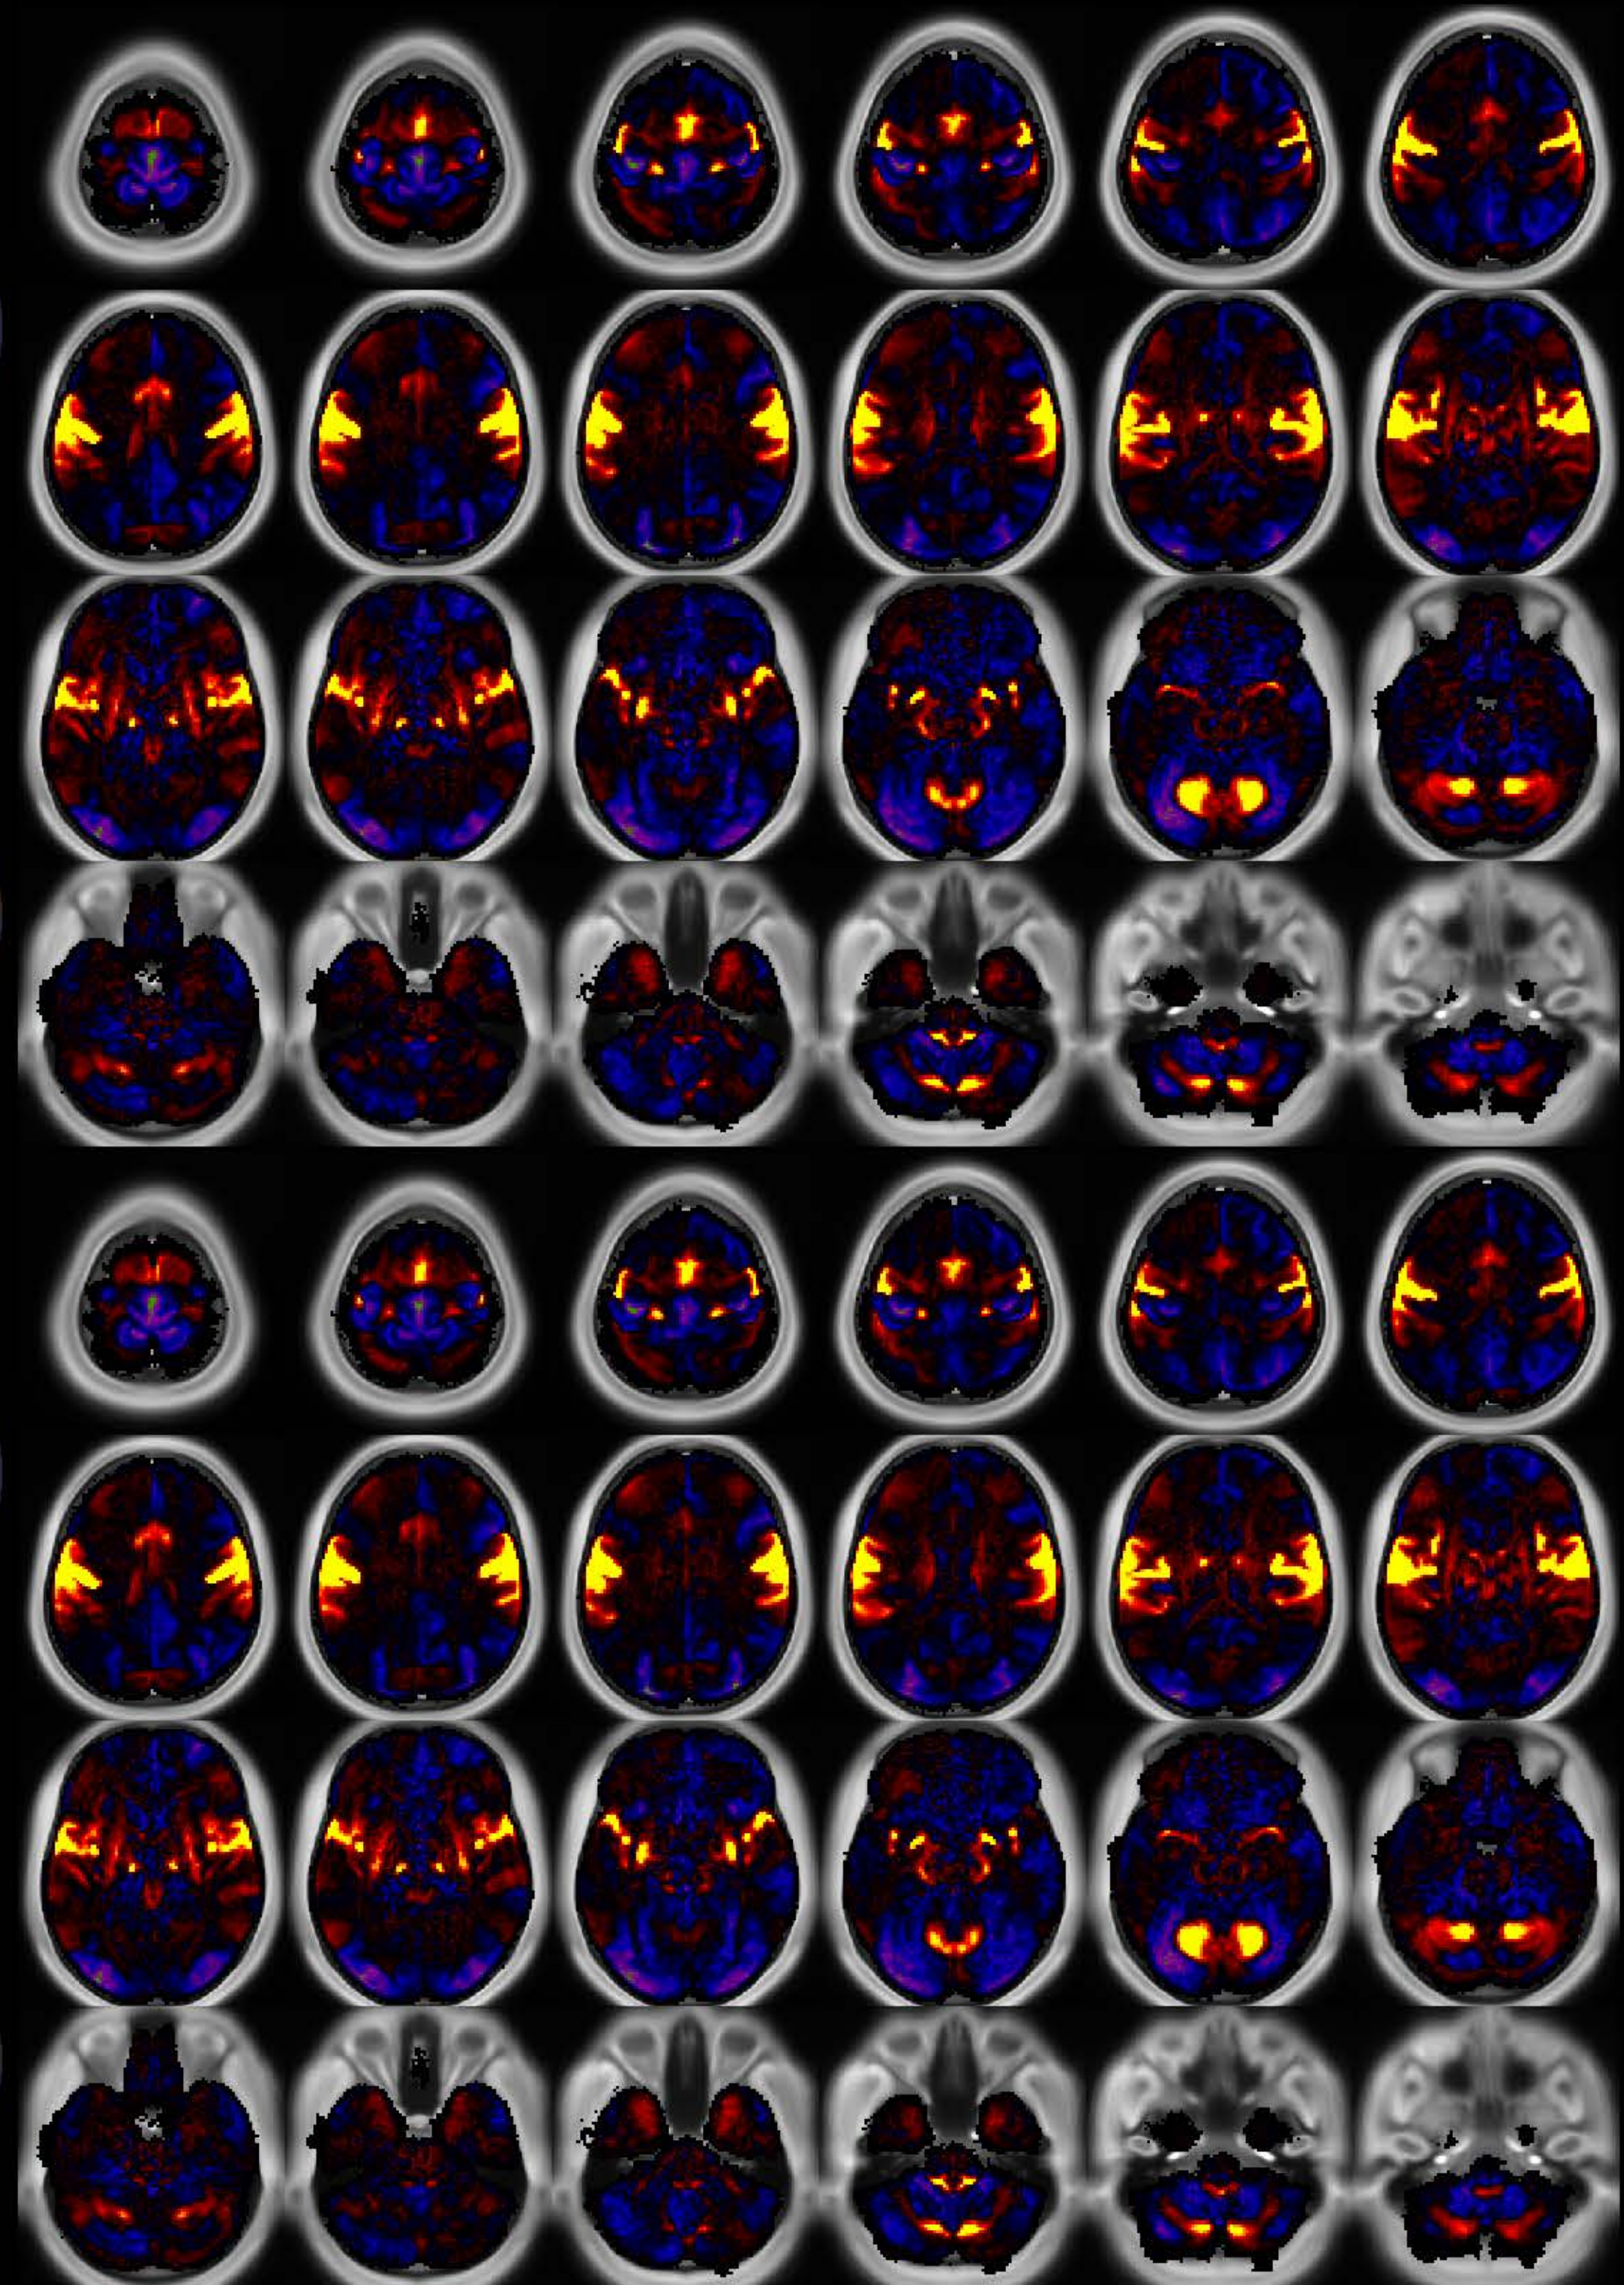

Seconds

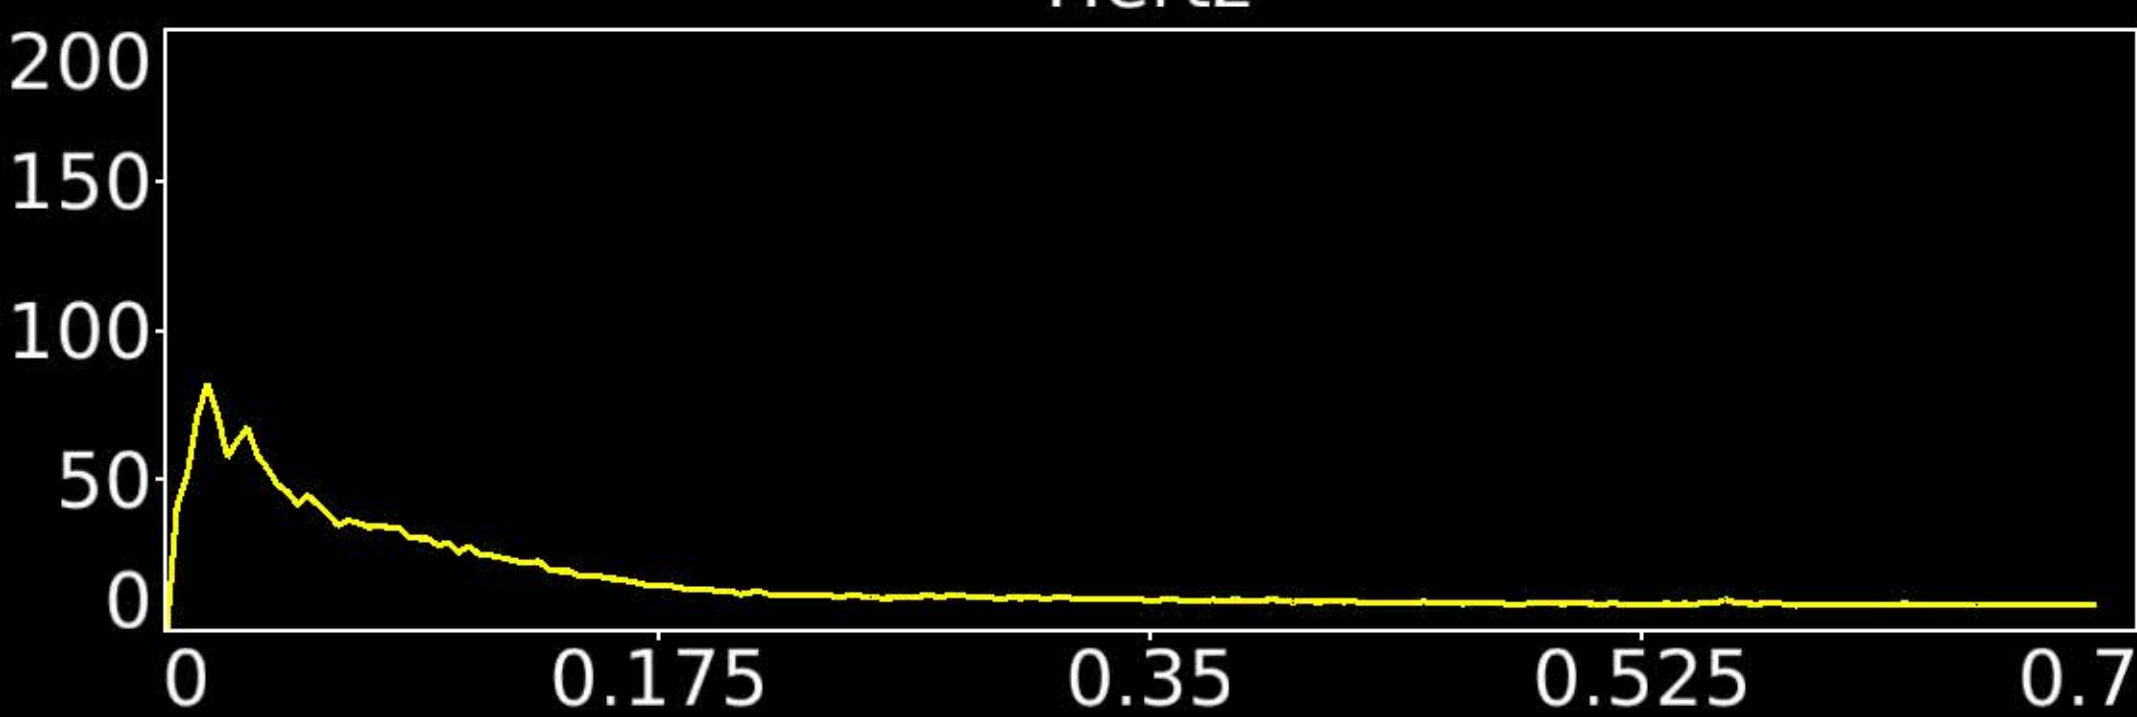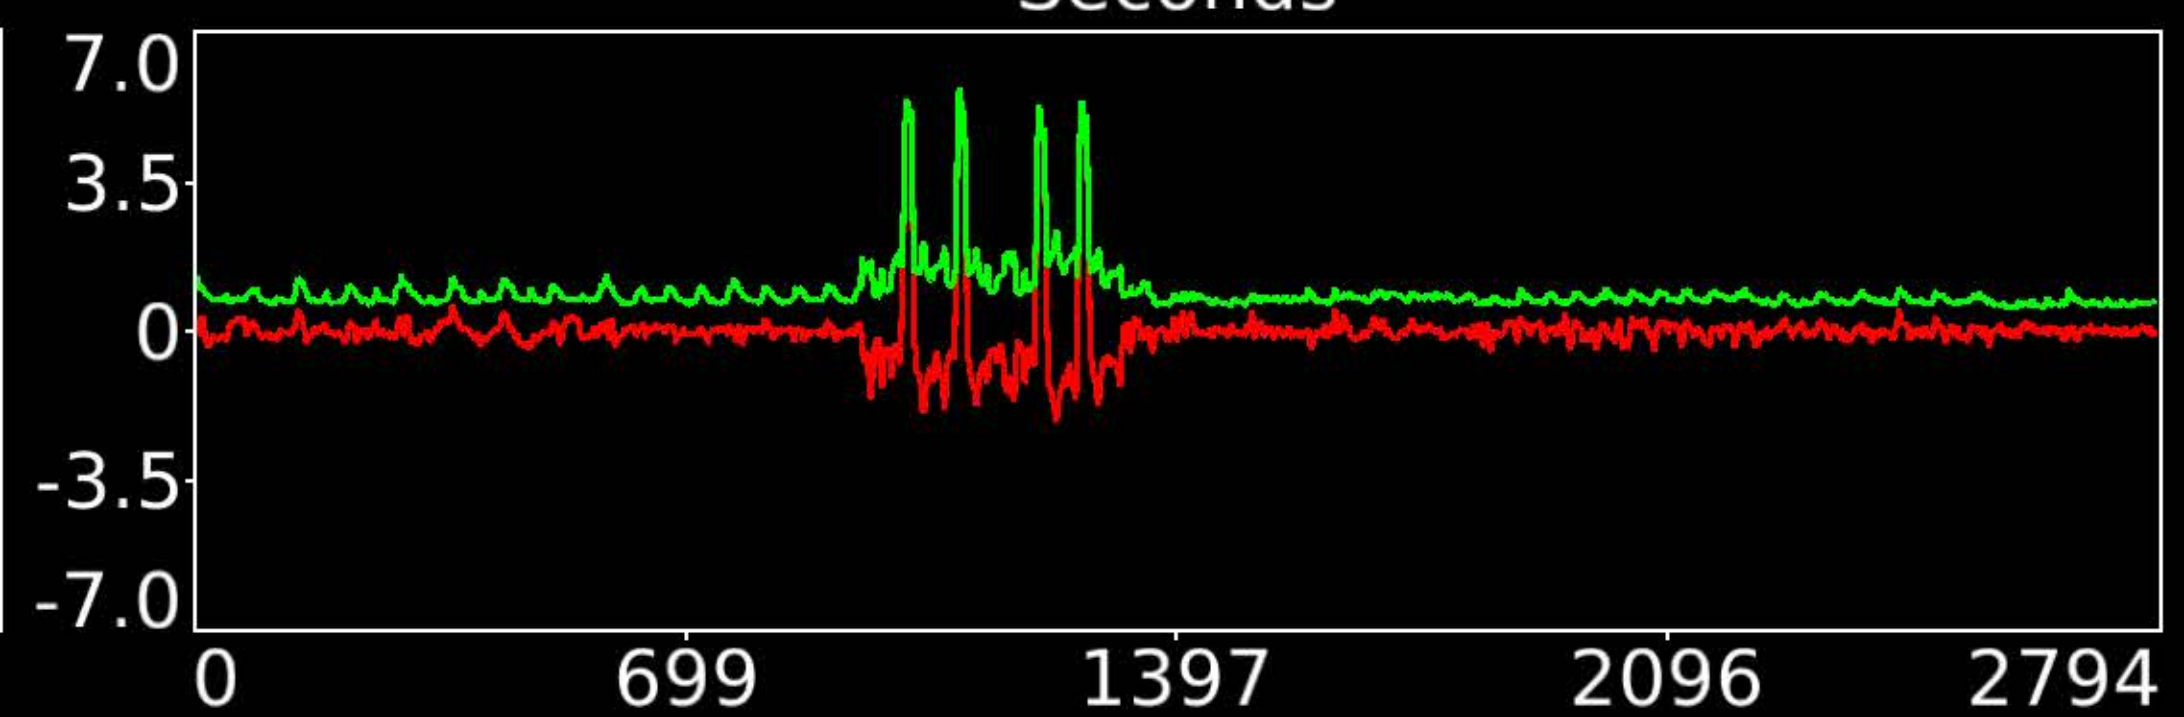

|                           |                            |                             |  |
|---------------------------|----------------------------|-----------------------------|--|
| Number & Class: 16 Signal |                            | Name: Head Motor Network    |  |
| RVT Correlated: No        | DVARS Dip Associated: Yes  | Cross-Subject Variable: Yes |  |
| Single Subject: No        | % Variance Explained: 1.92 | Globality Index: 0.13       |  |
| Rest Component: 27        | Taskr Component: 18        | Task Modulated: Motor       |  |

Rationale: Spatial map includes positive and negative patches that respect known somatotopic sensori-motor organization (Face)



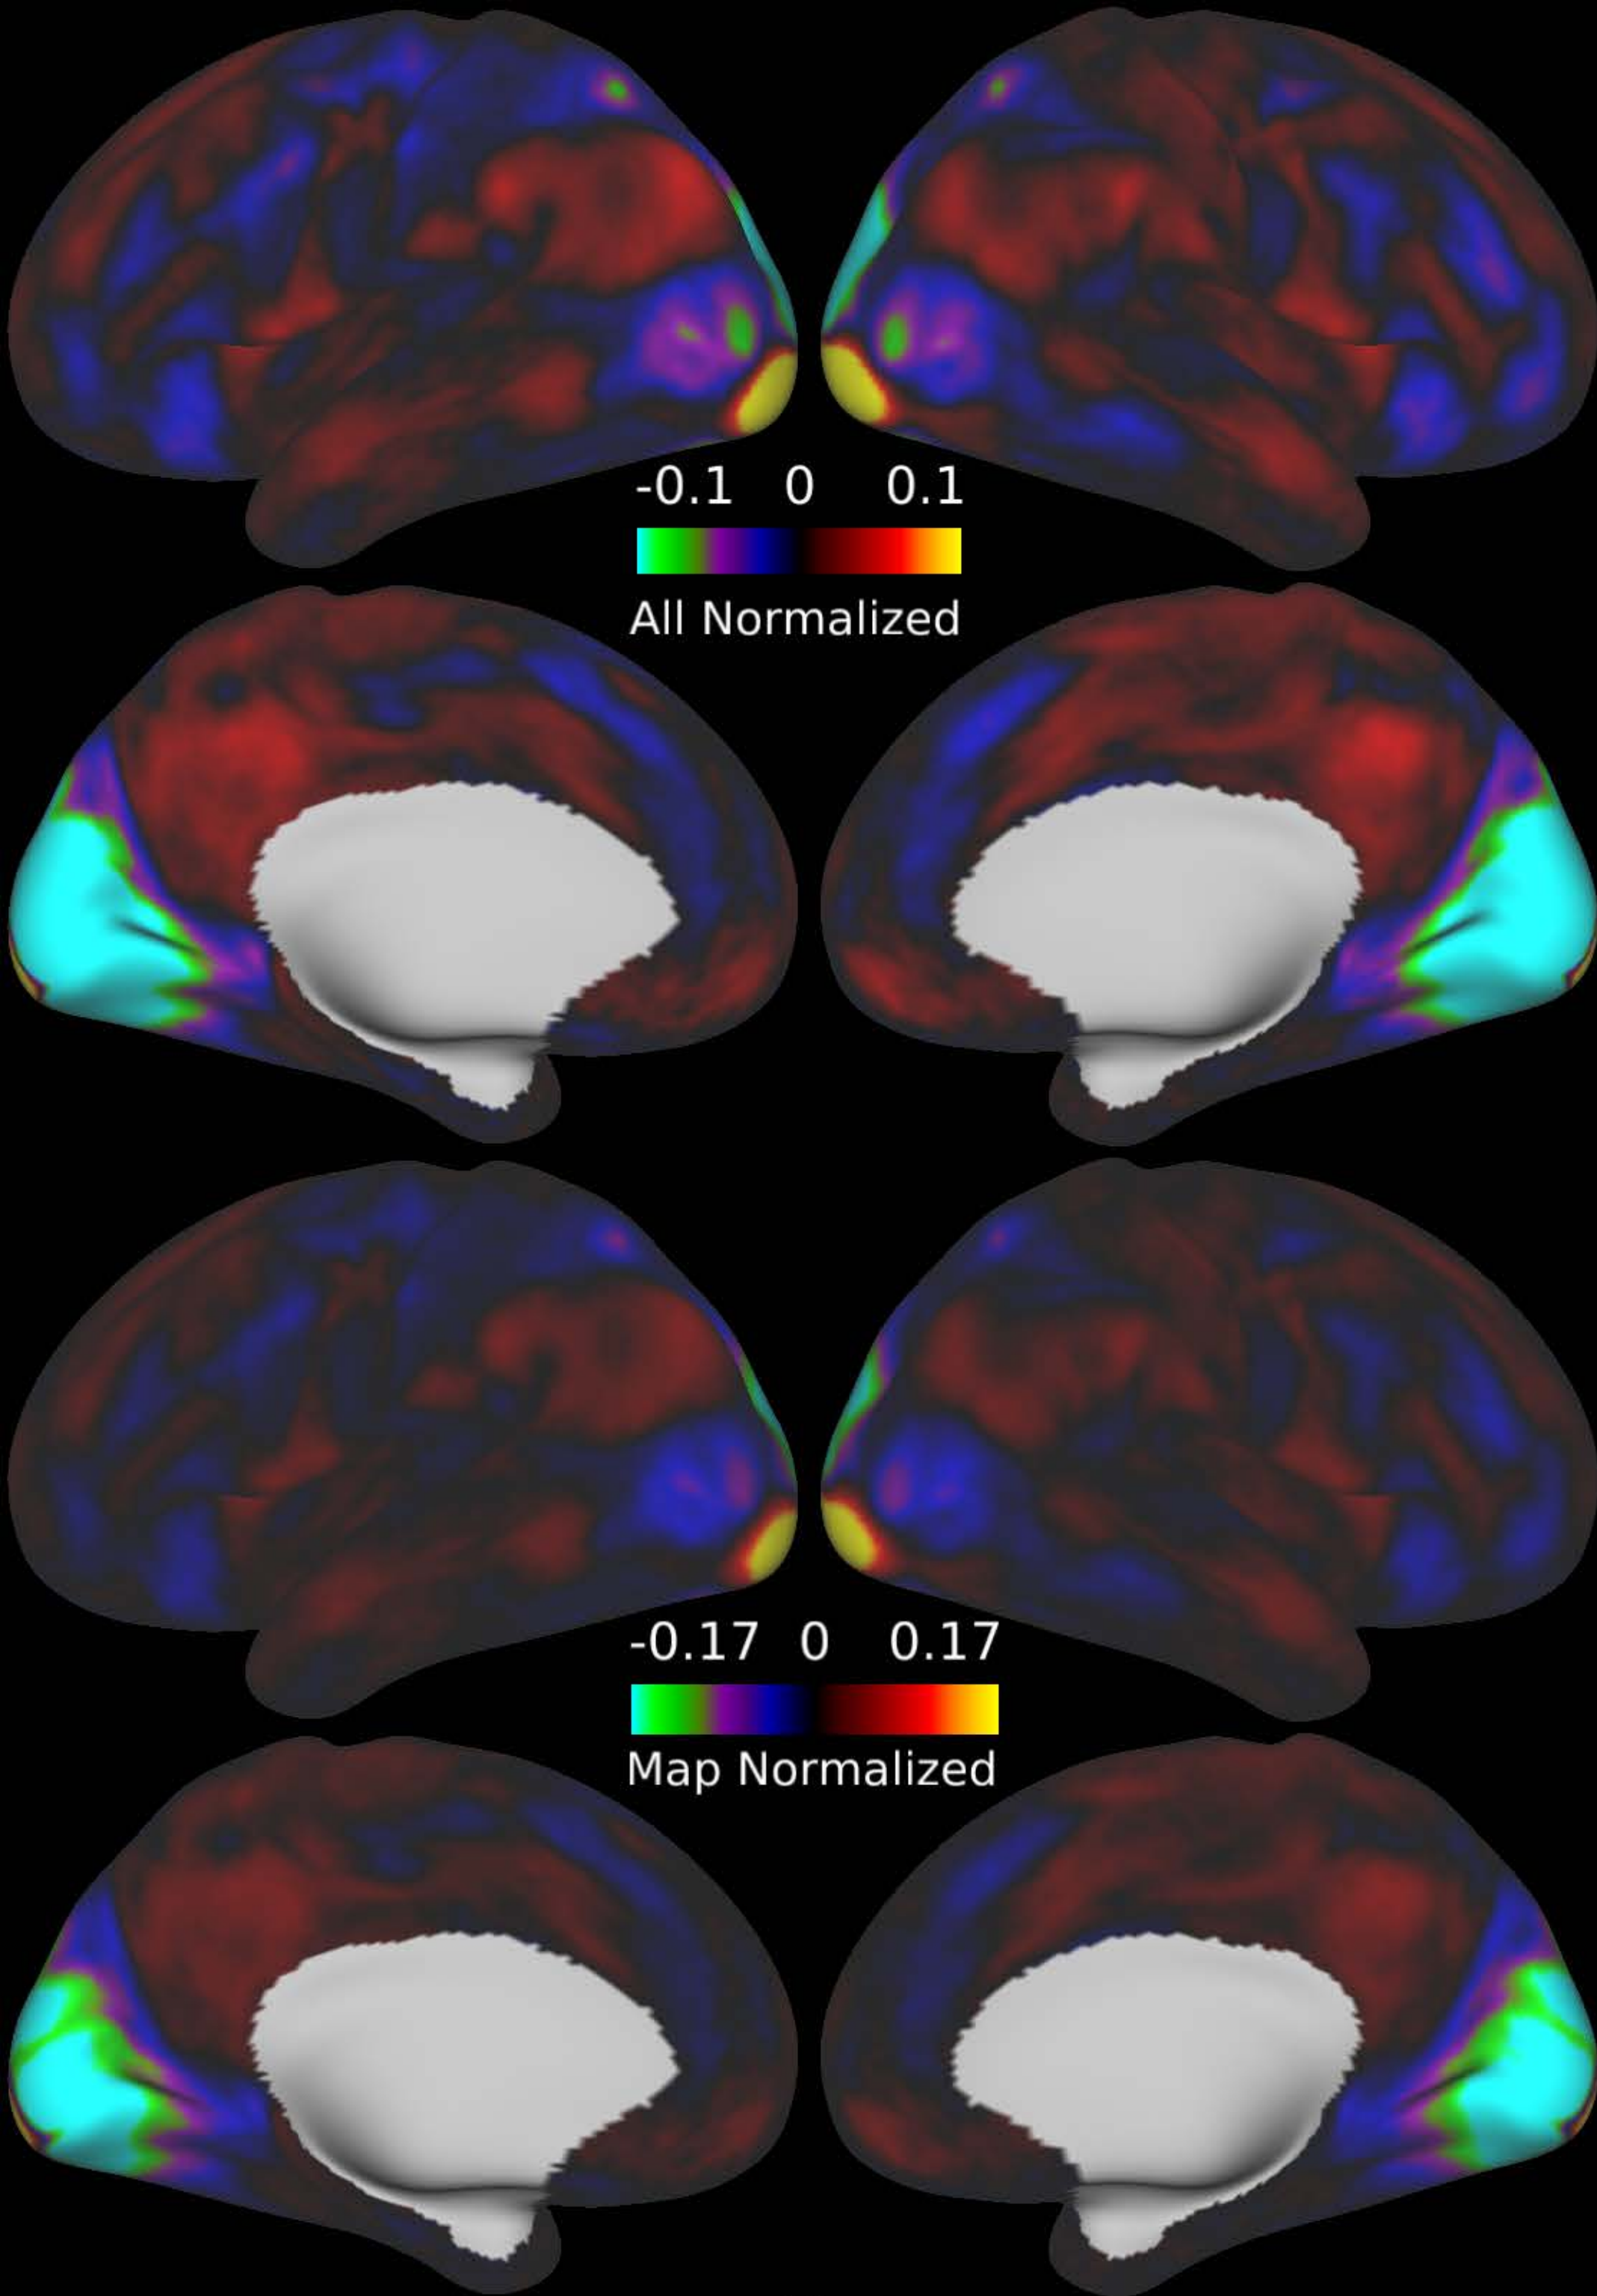

Hertz

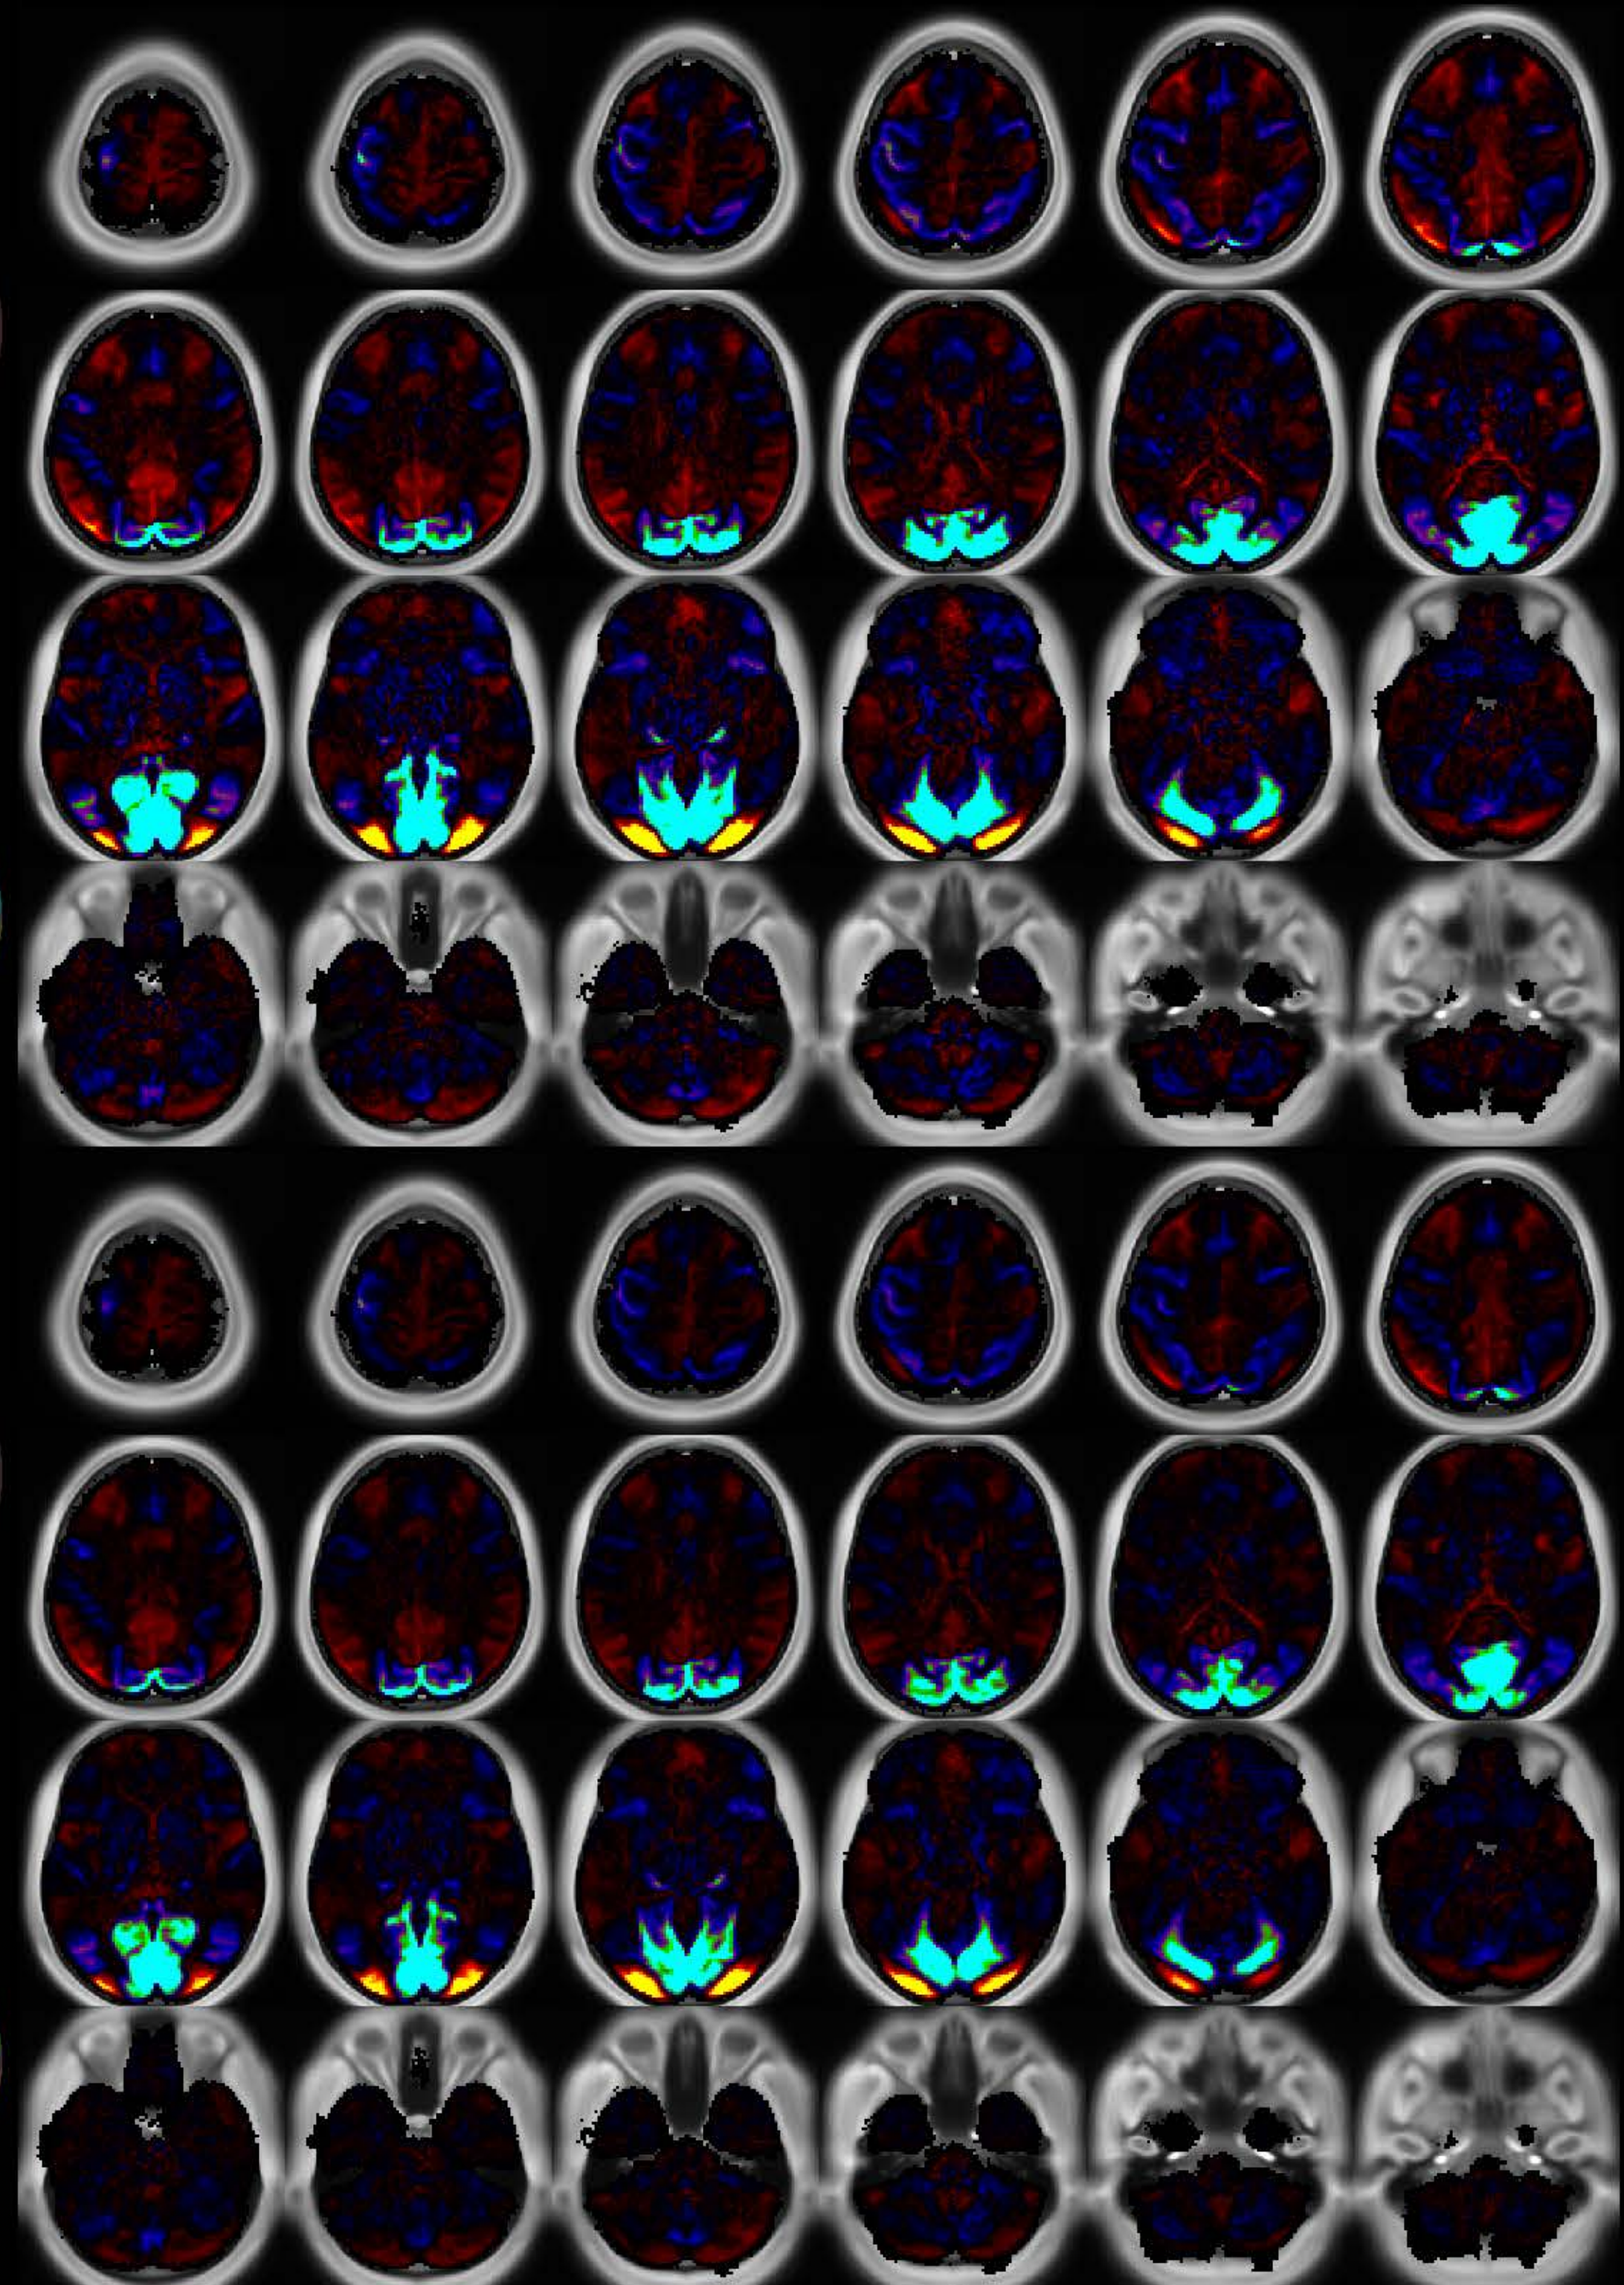

Seconds

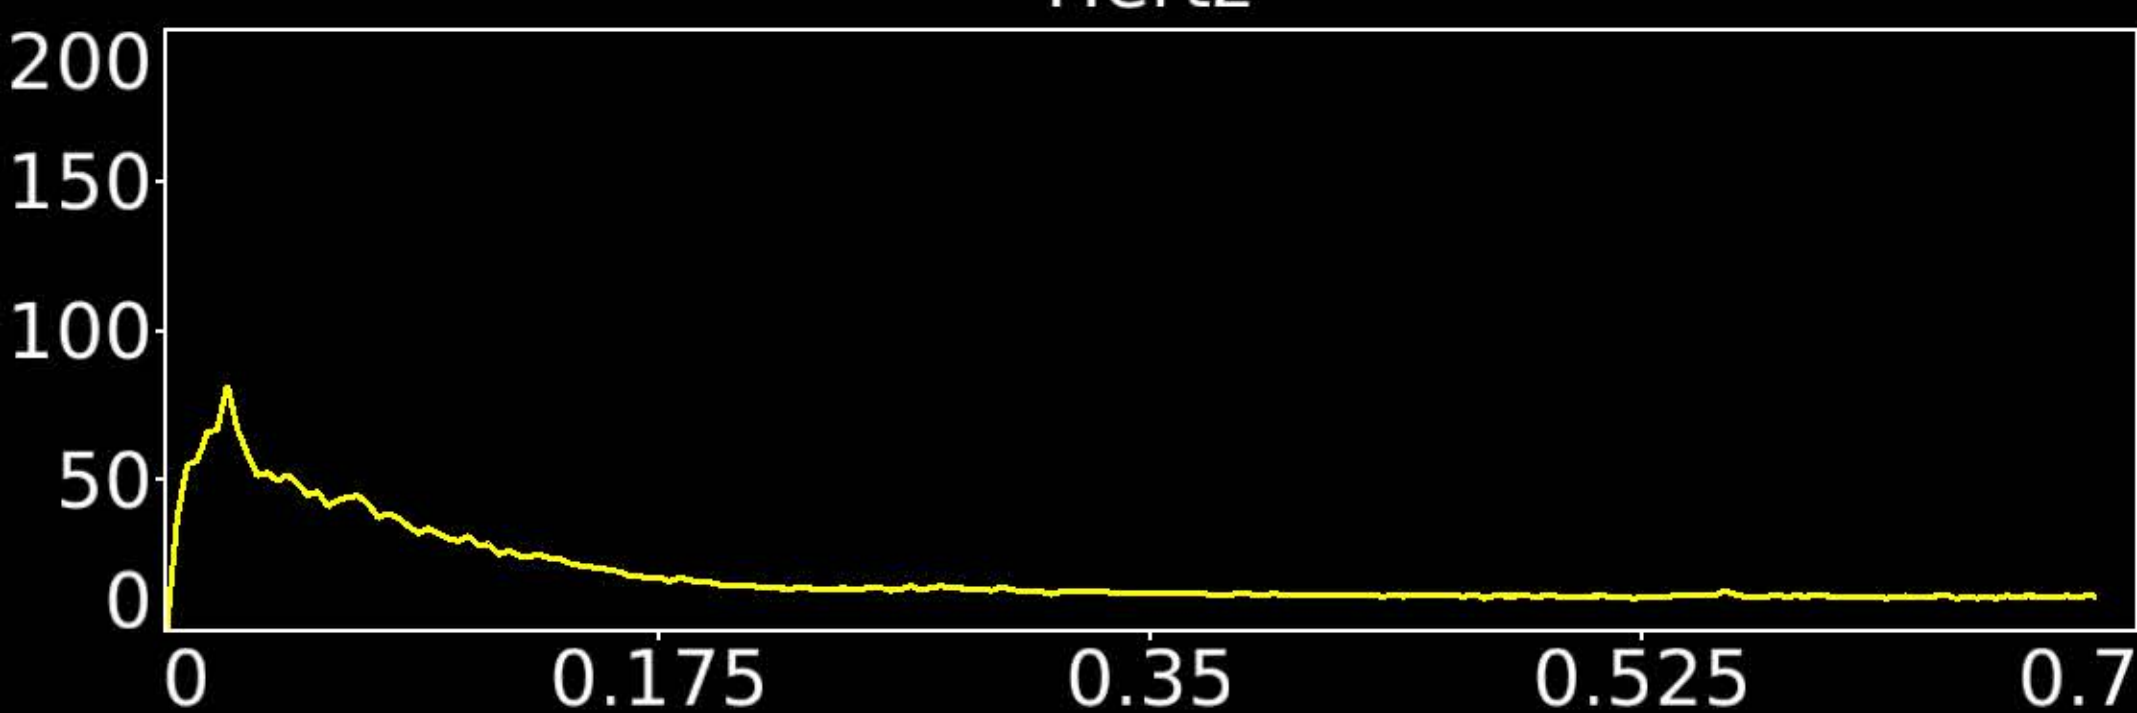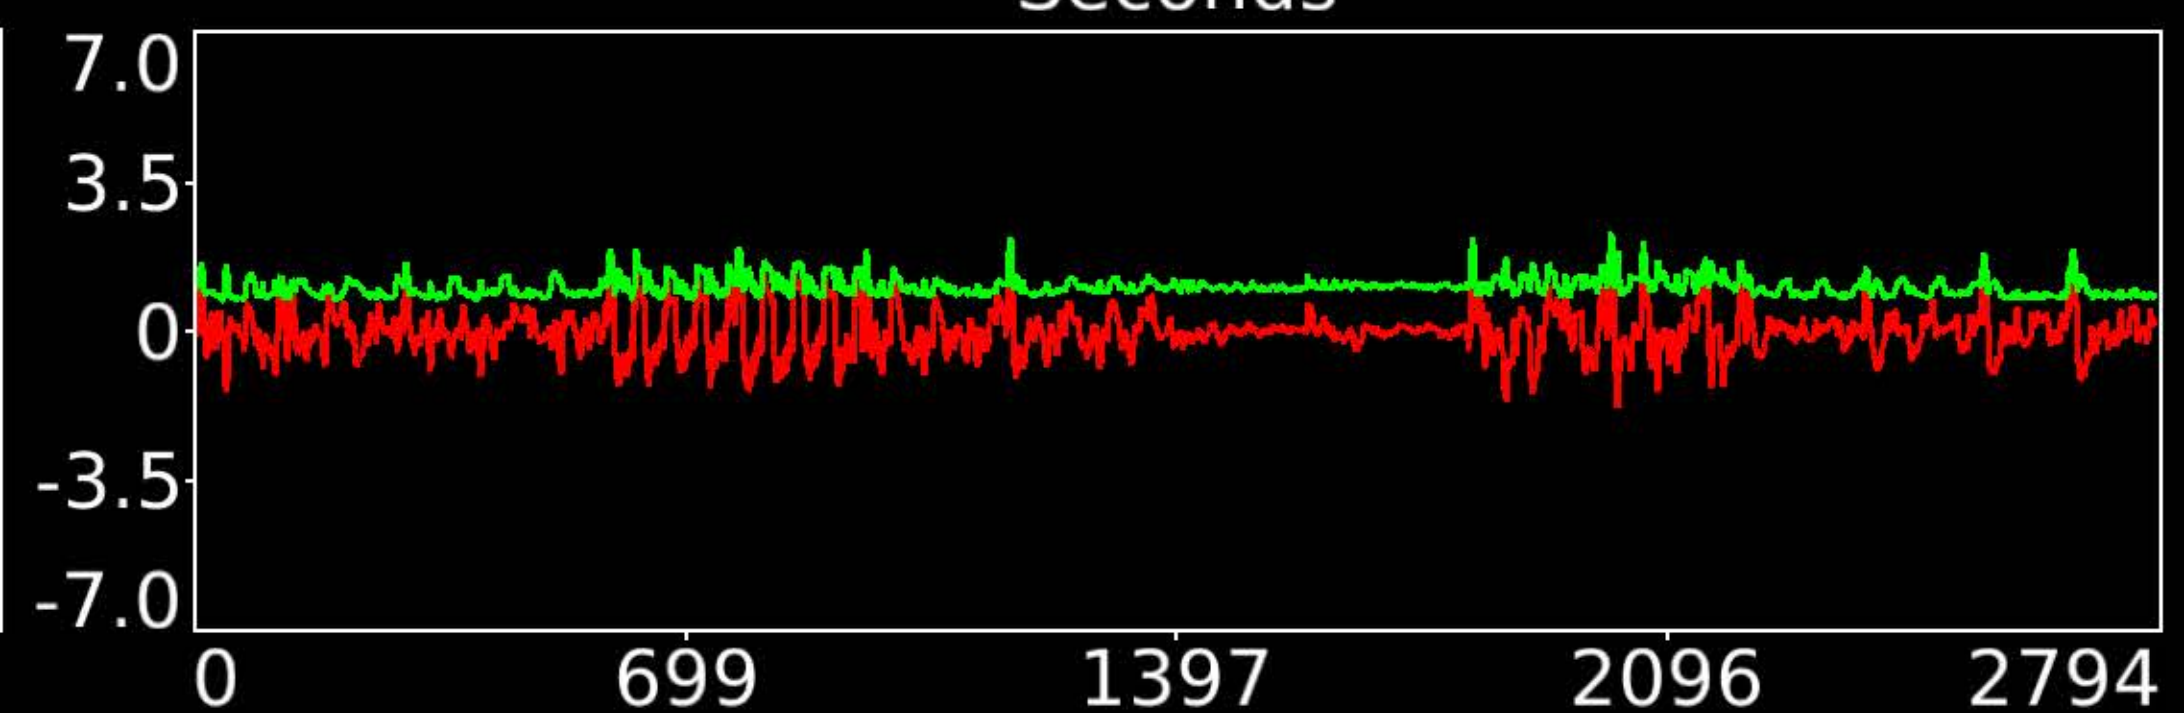

|                           |                            |                                        |  |
|---------------------------|----------------------------|----------------------------------------|--|
| Number & Class: 17 Signal |                            | Name: Early Visual Foveal > Peripheral |  |
| RVT Correlated: No        | DVARS Dip Associated: No   | Cross-Subject Variable: No             |  |
| Single Subject: No        | % Variance Explained: 1.87 | Globality Index: 0.04                  |  |
| Rest Component: 16        | Taskr Component: 10        | Task Modulated: No                     |  |

Rationale: Spatial map includes positive and negative patches that respect known retinotopic visual organization (Foveal vs Peripheral)



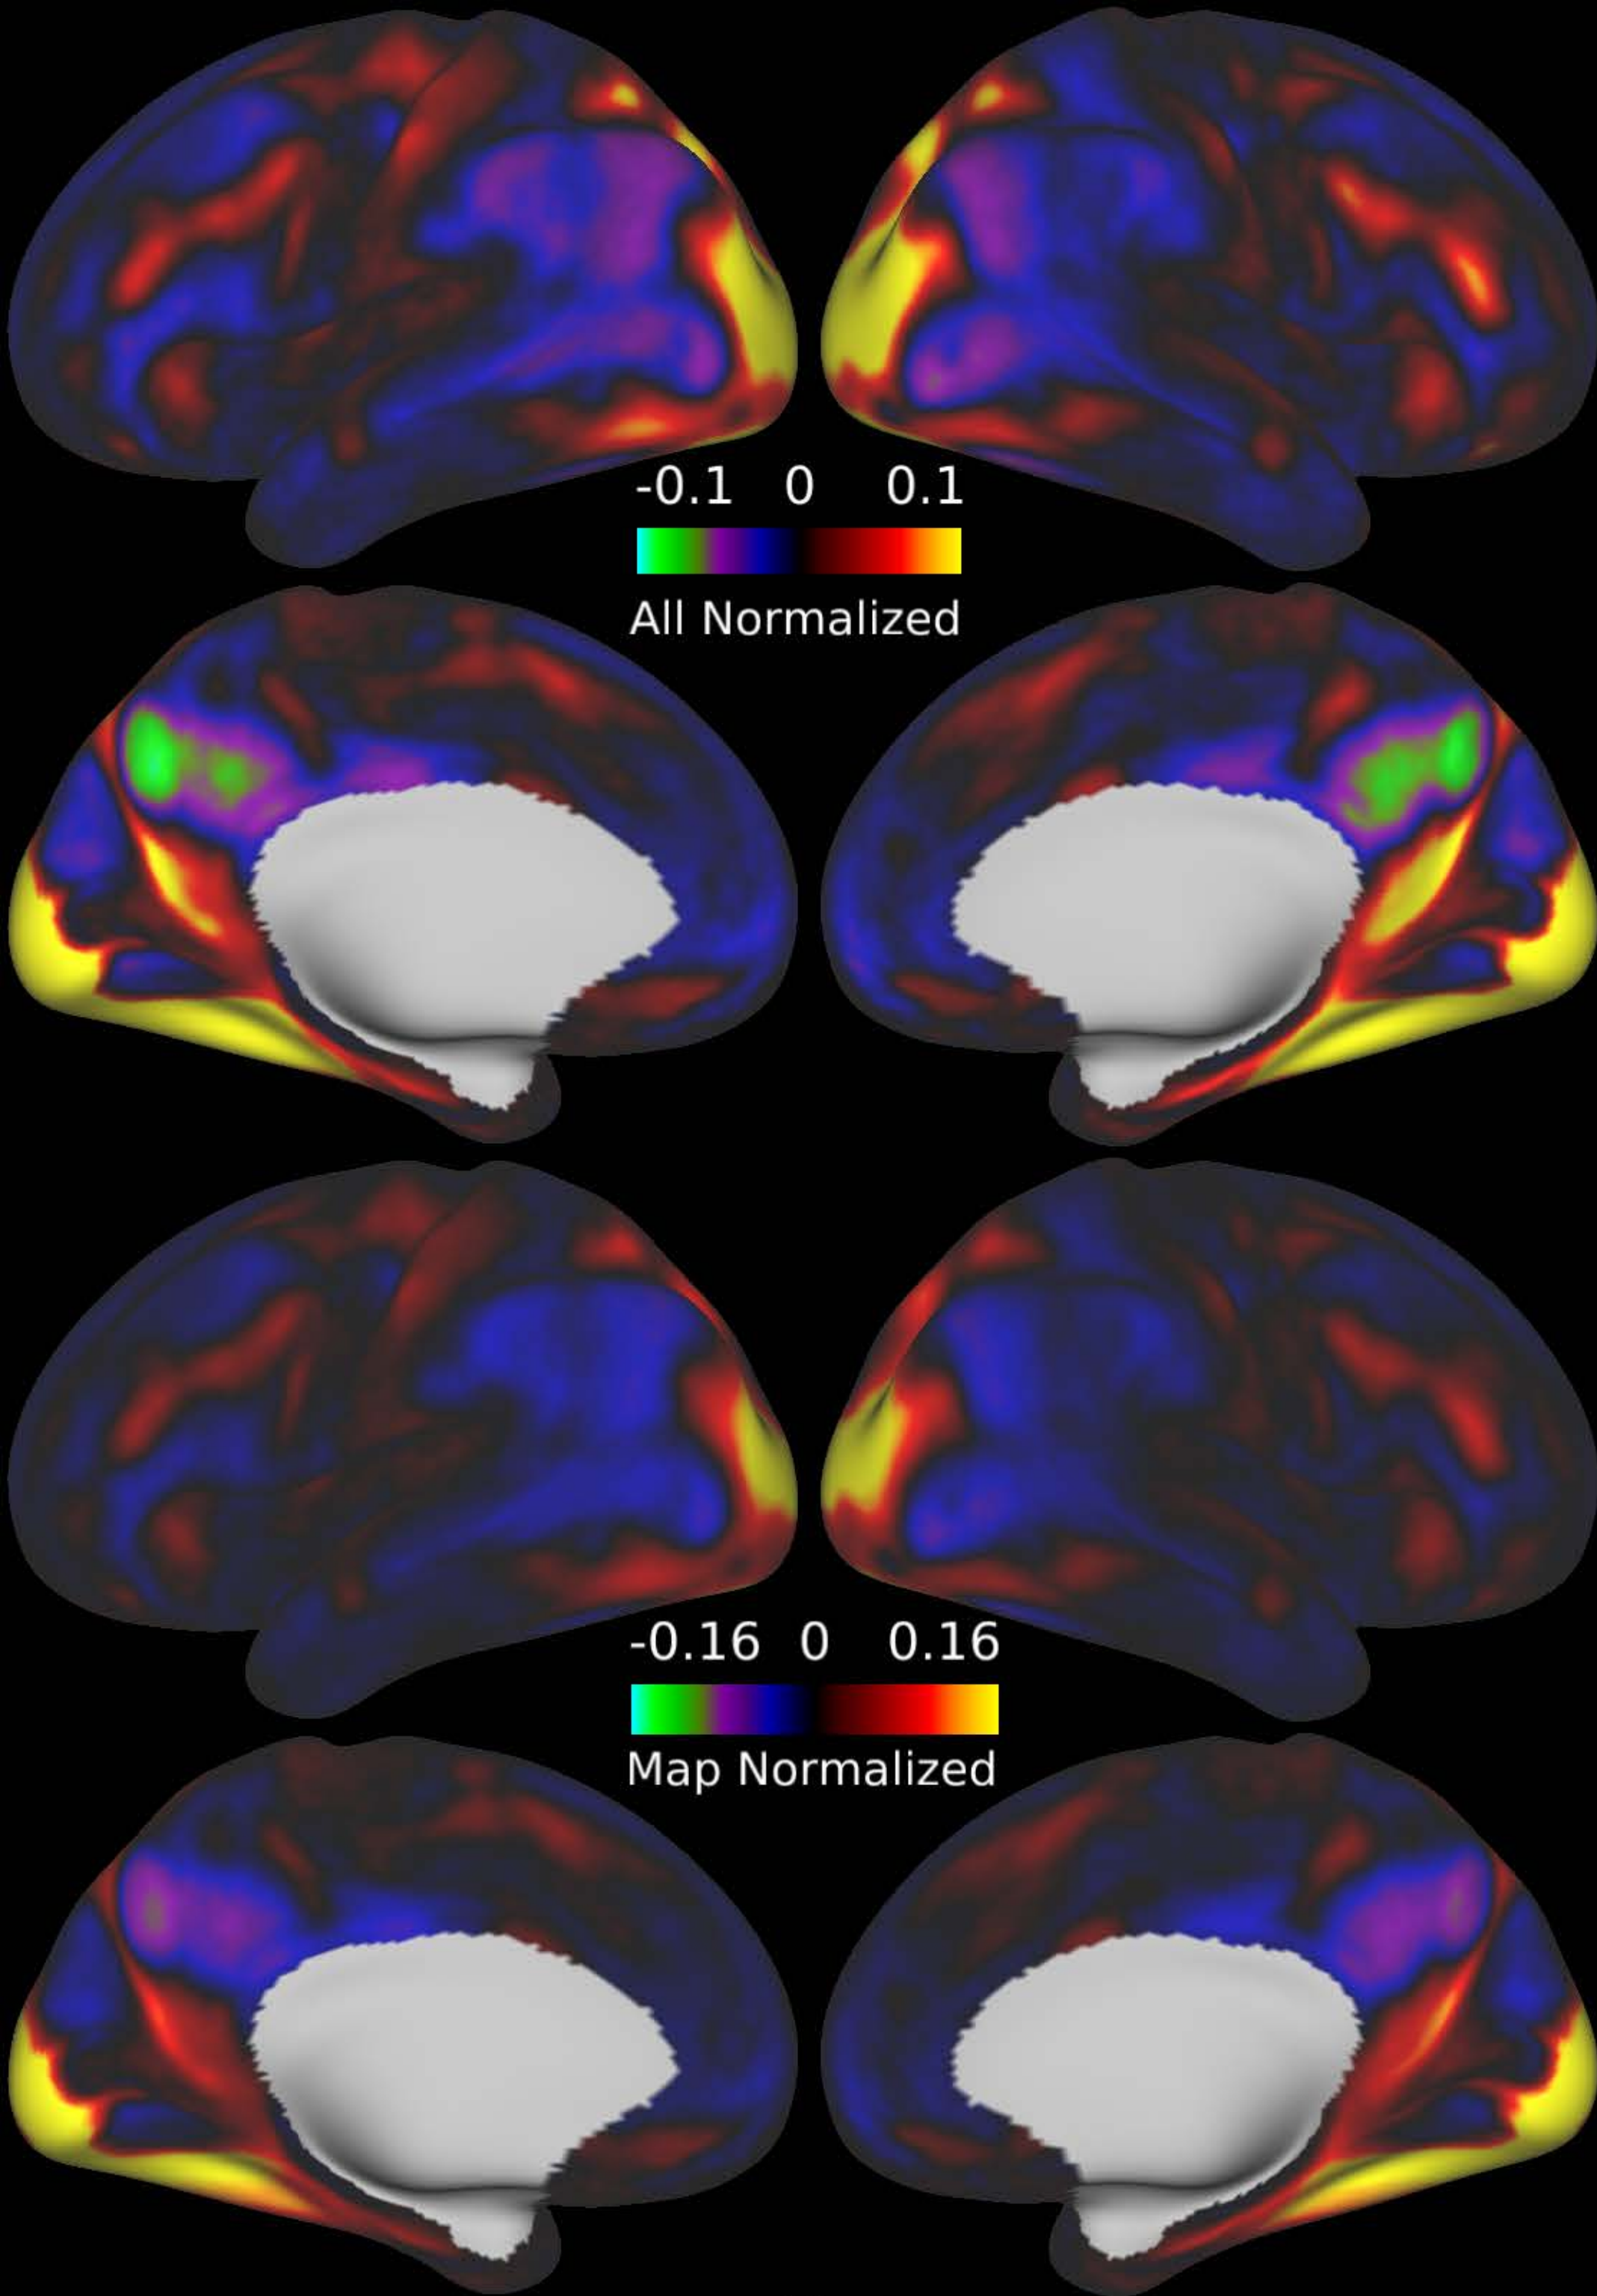

Hertz

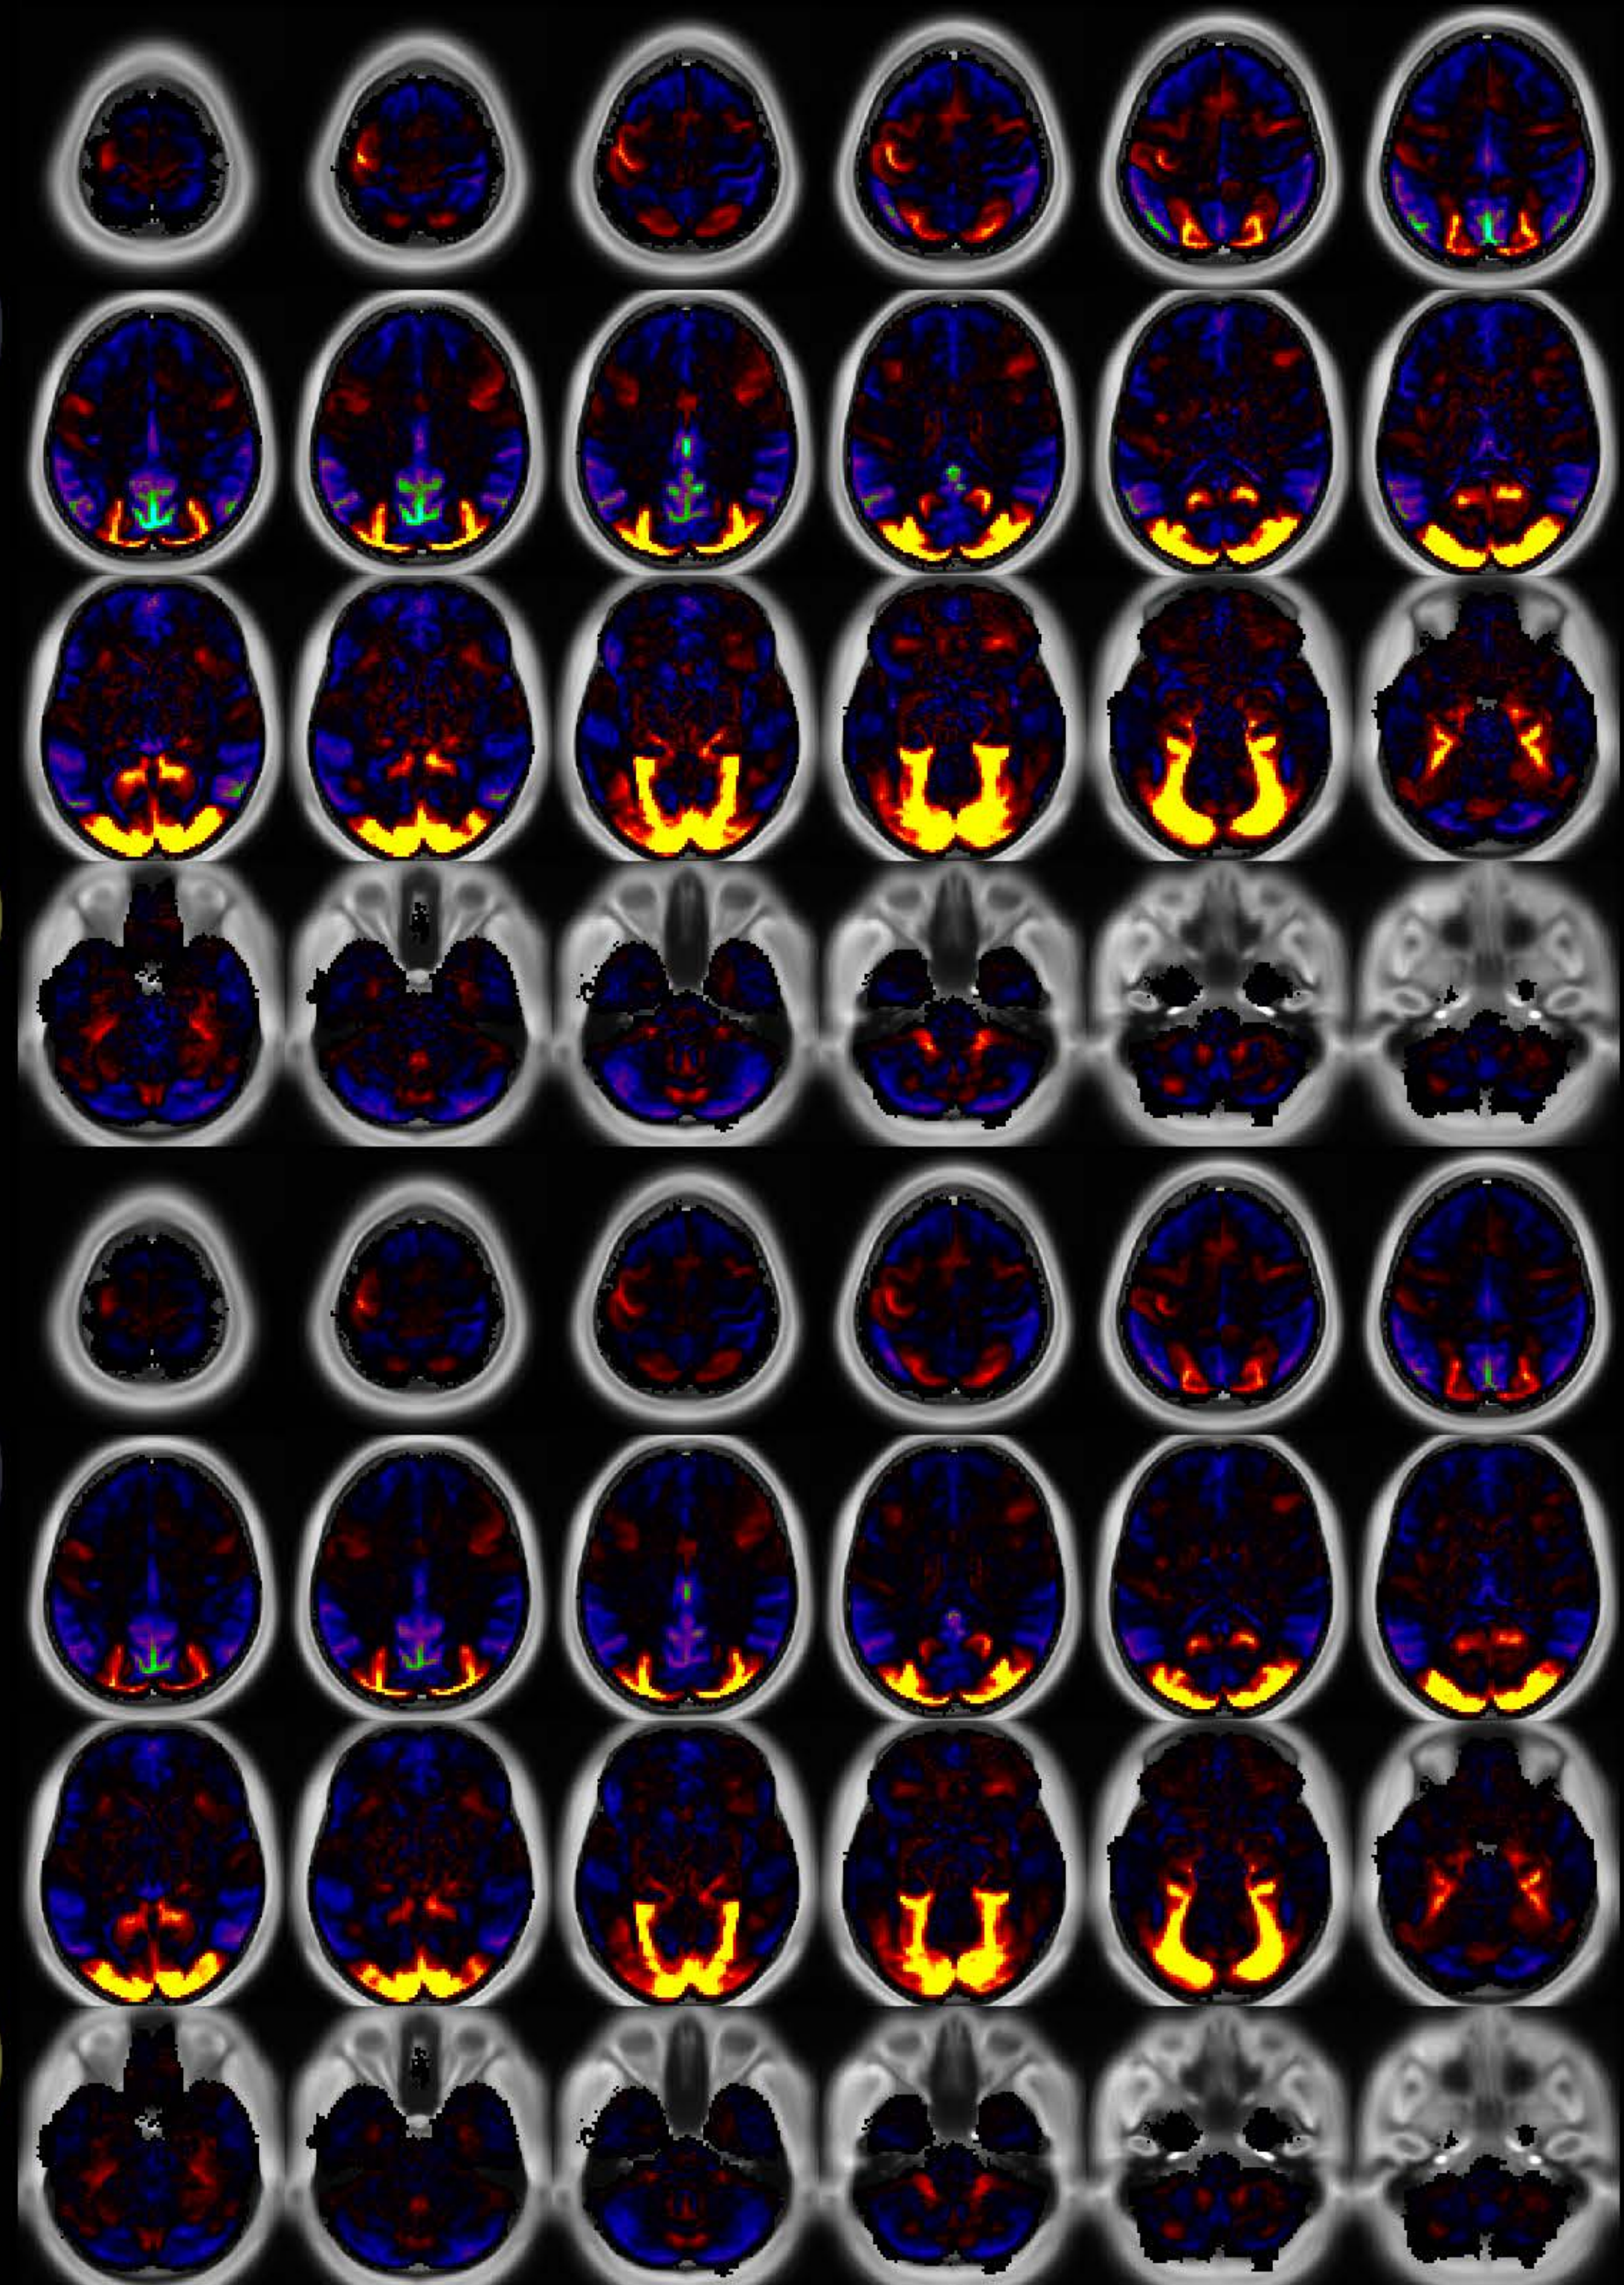

Seconds

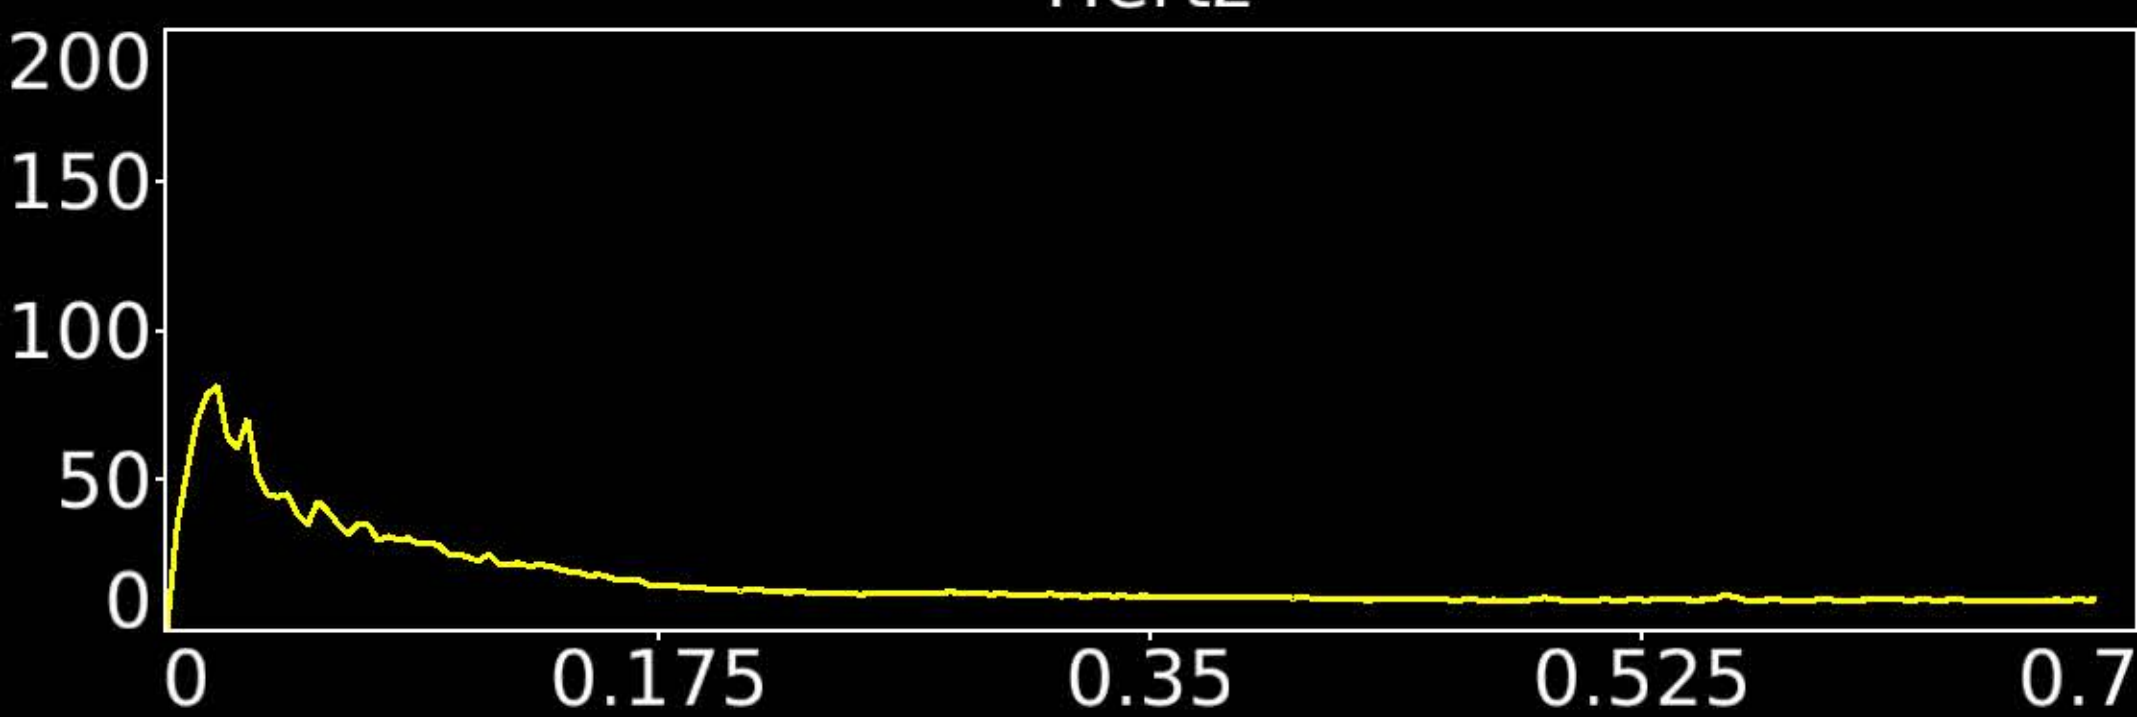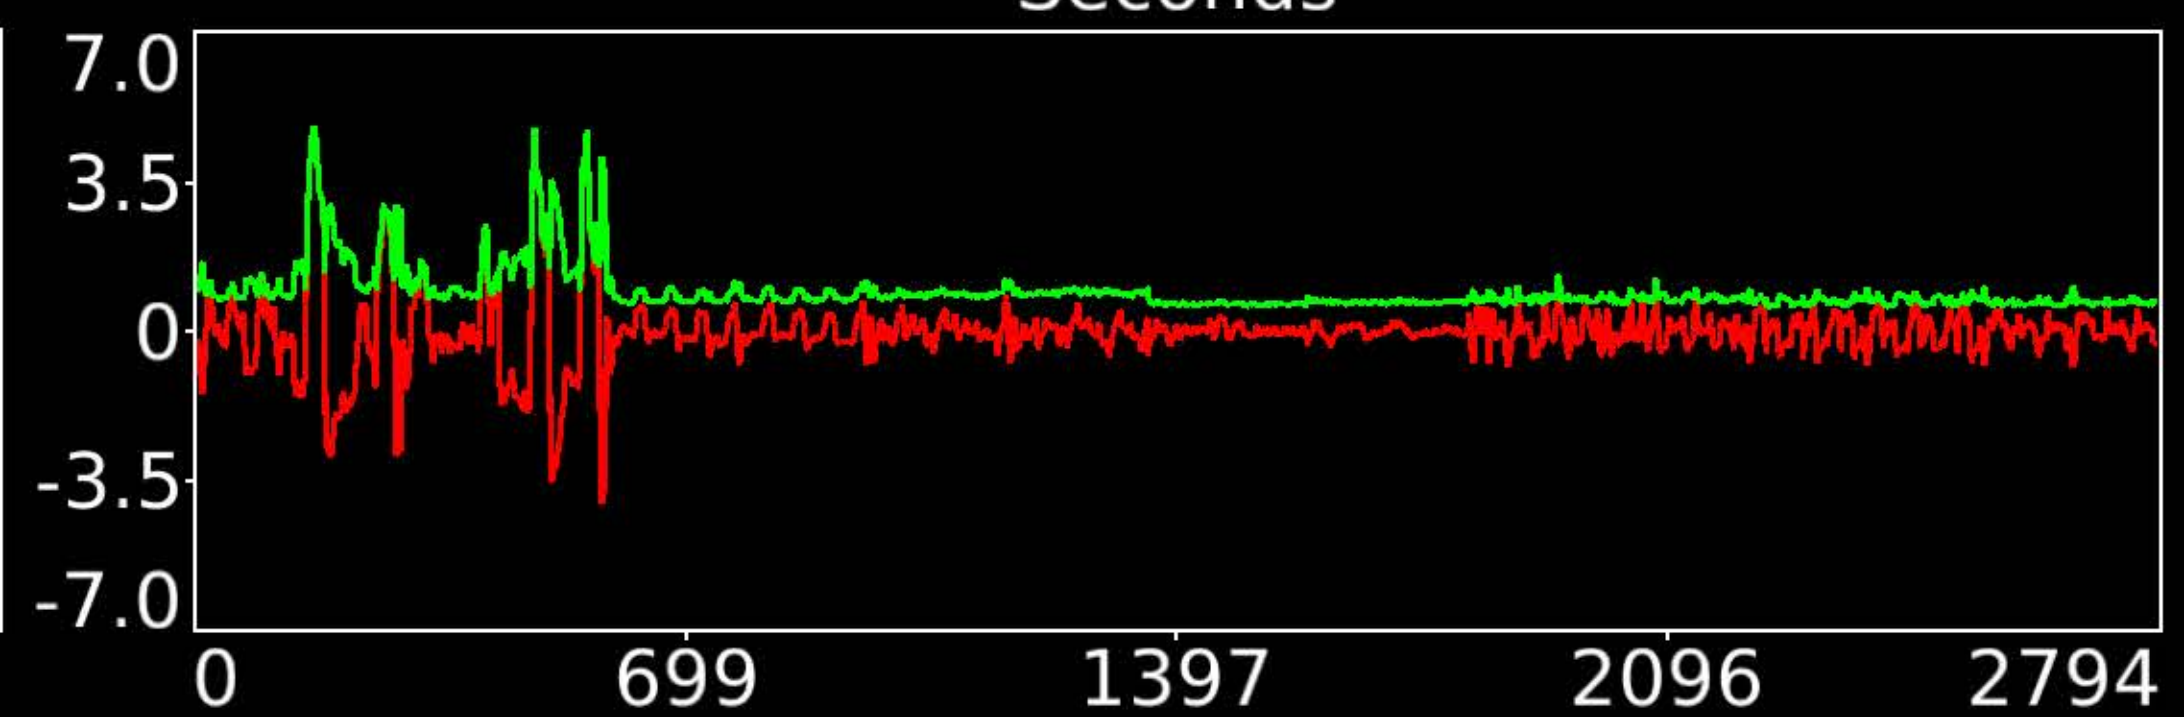

|                                                                                                               |                            |                                 |  |
|---------------------------------------------------------------------------------------------------------------|----------------------------|---------------------------------|--|
| Number & Class: 18 Signal                                                                                     |                            | Name: Working Memory Task Place |  |
| RVT Correlated: No                                                                                            | DVARS Dip Associated: No   | Cross-Subject Variable: No      |  |
| Single Subject: No                                                                                            | % Variance Explained: 1.79 | Globality Index: 0.27           |  |
| Rest Component: No                                                                                            | Taskr Component: 7         | Task Modulated: Working Memory  |  |
| Rationale: Spatial map includes positive and negative patches that are correlated with a specific task design |                            |                                 |  |



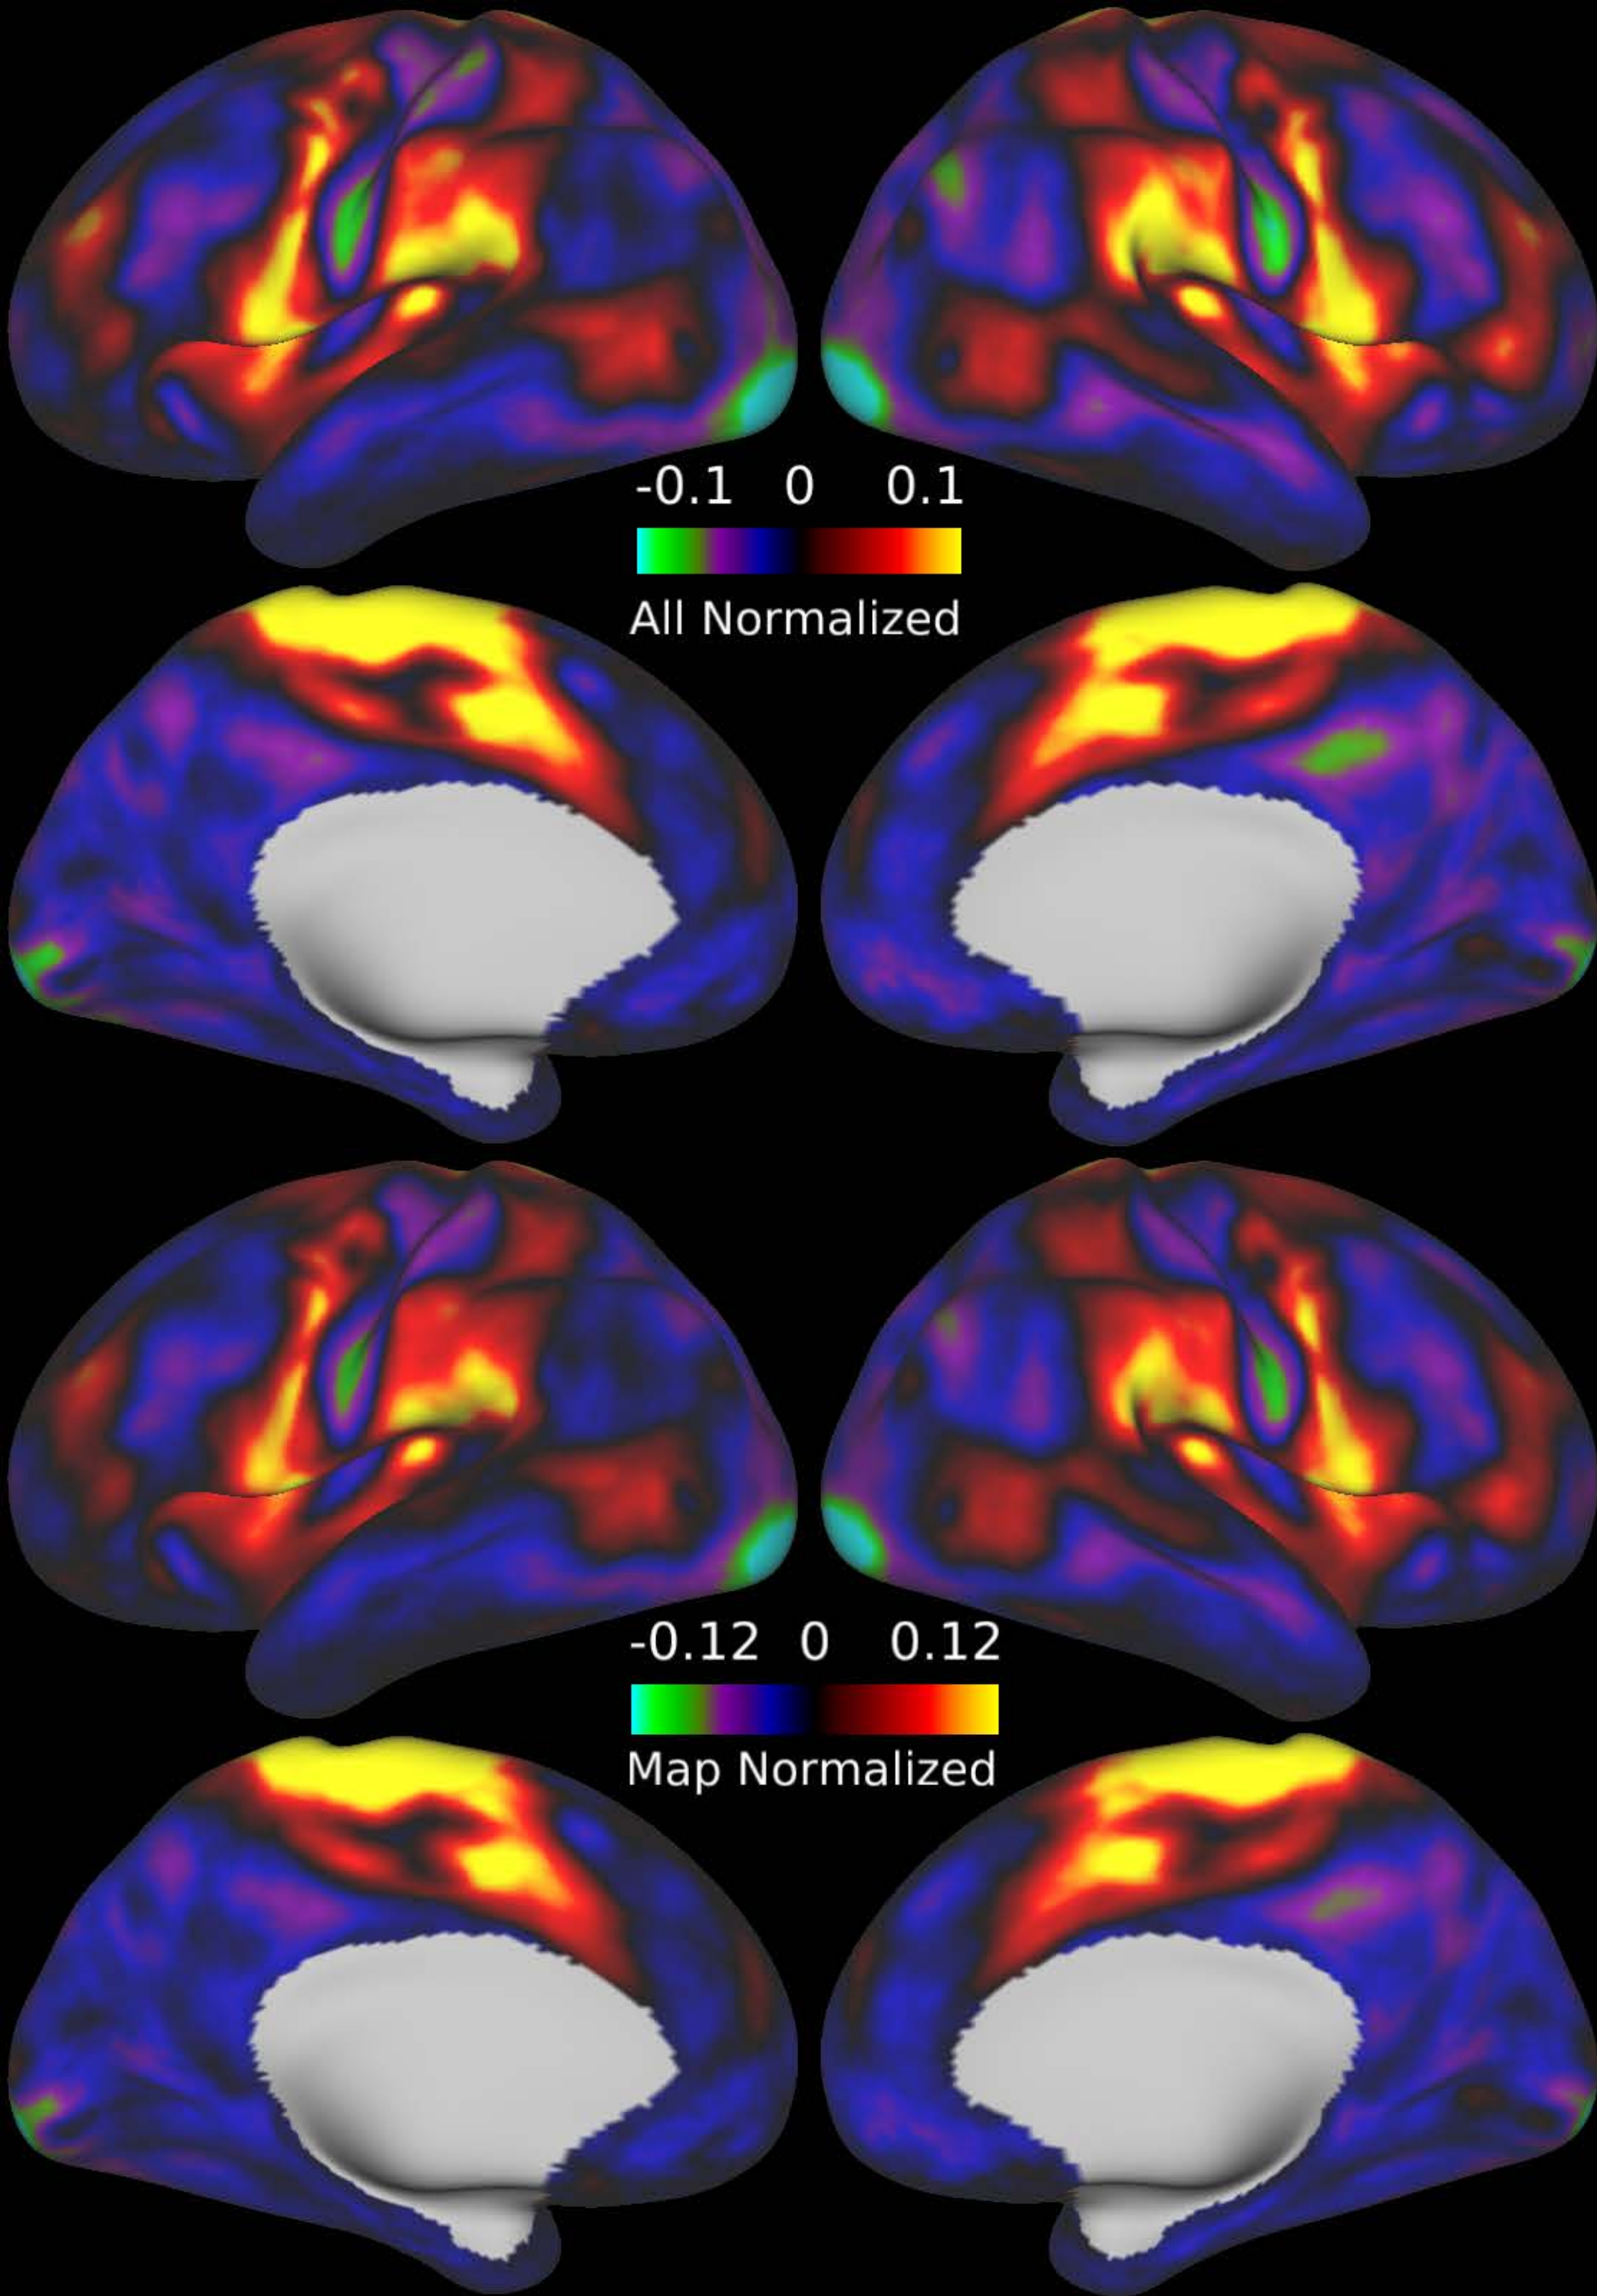

Hertz

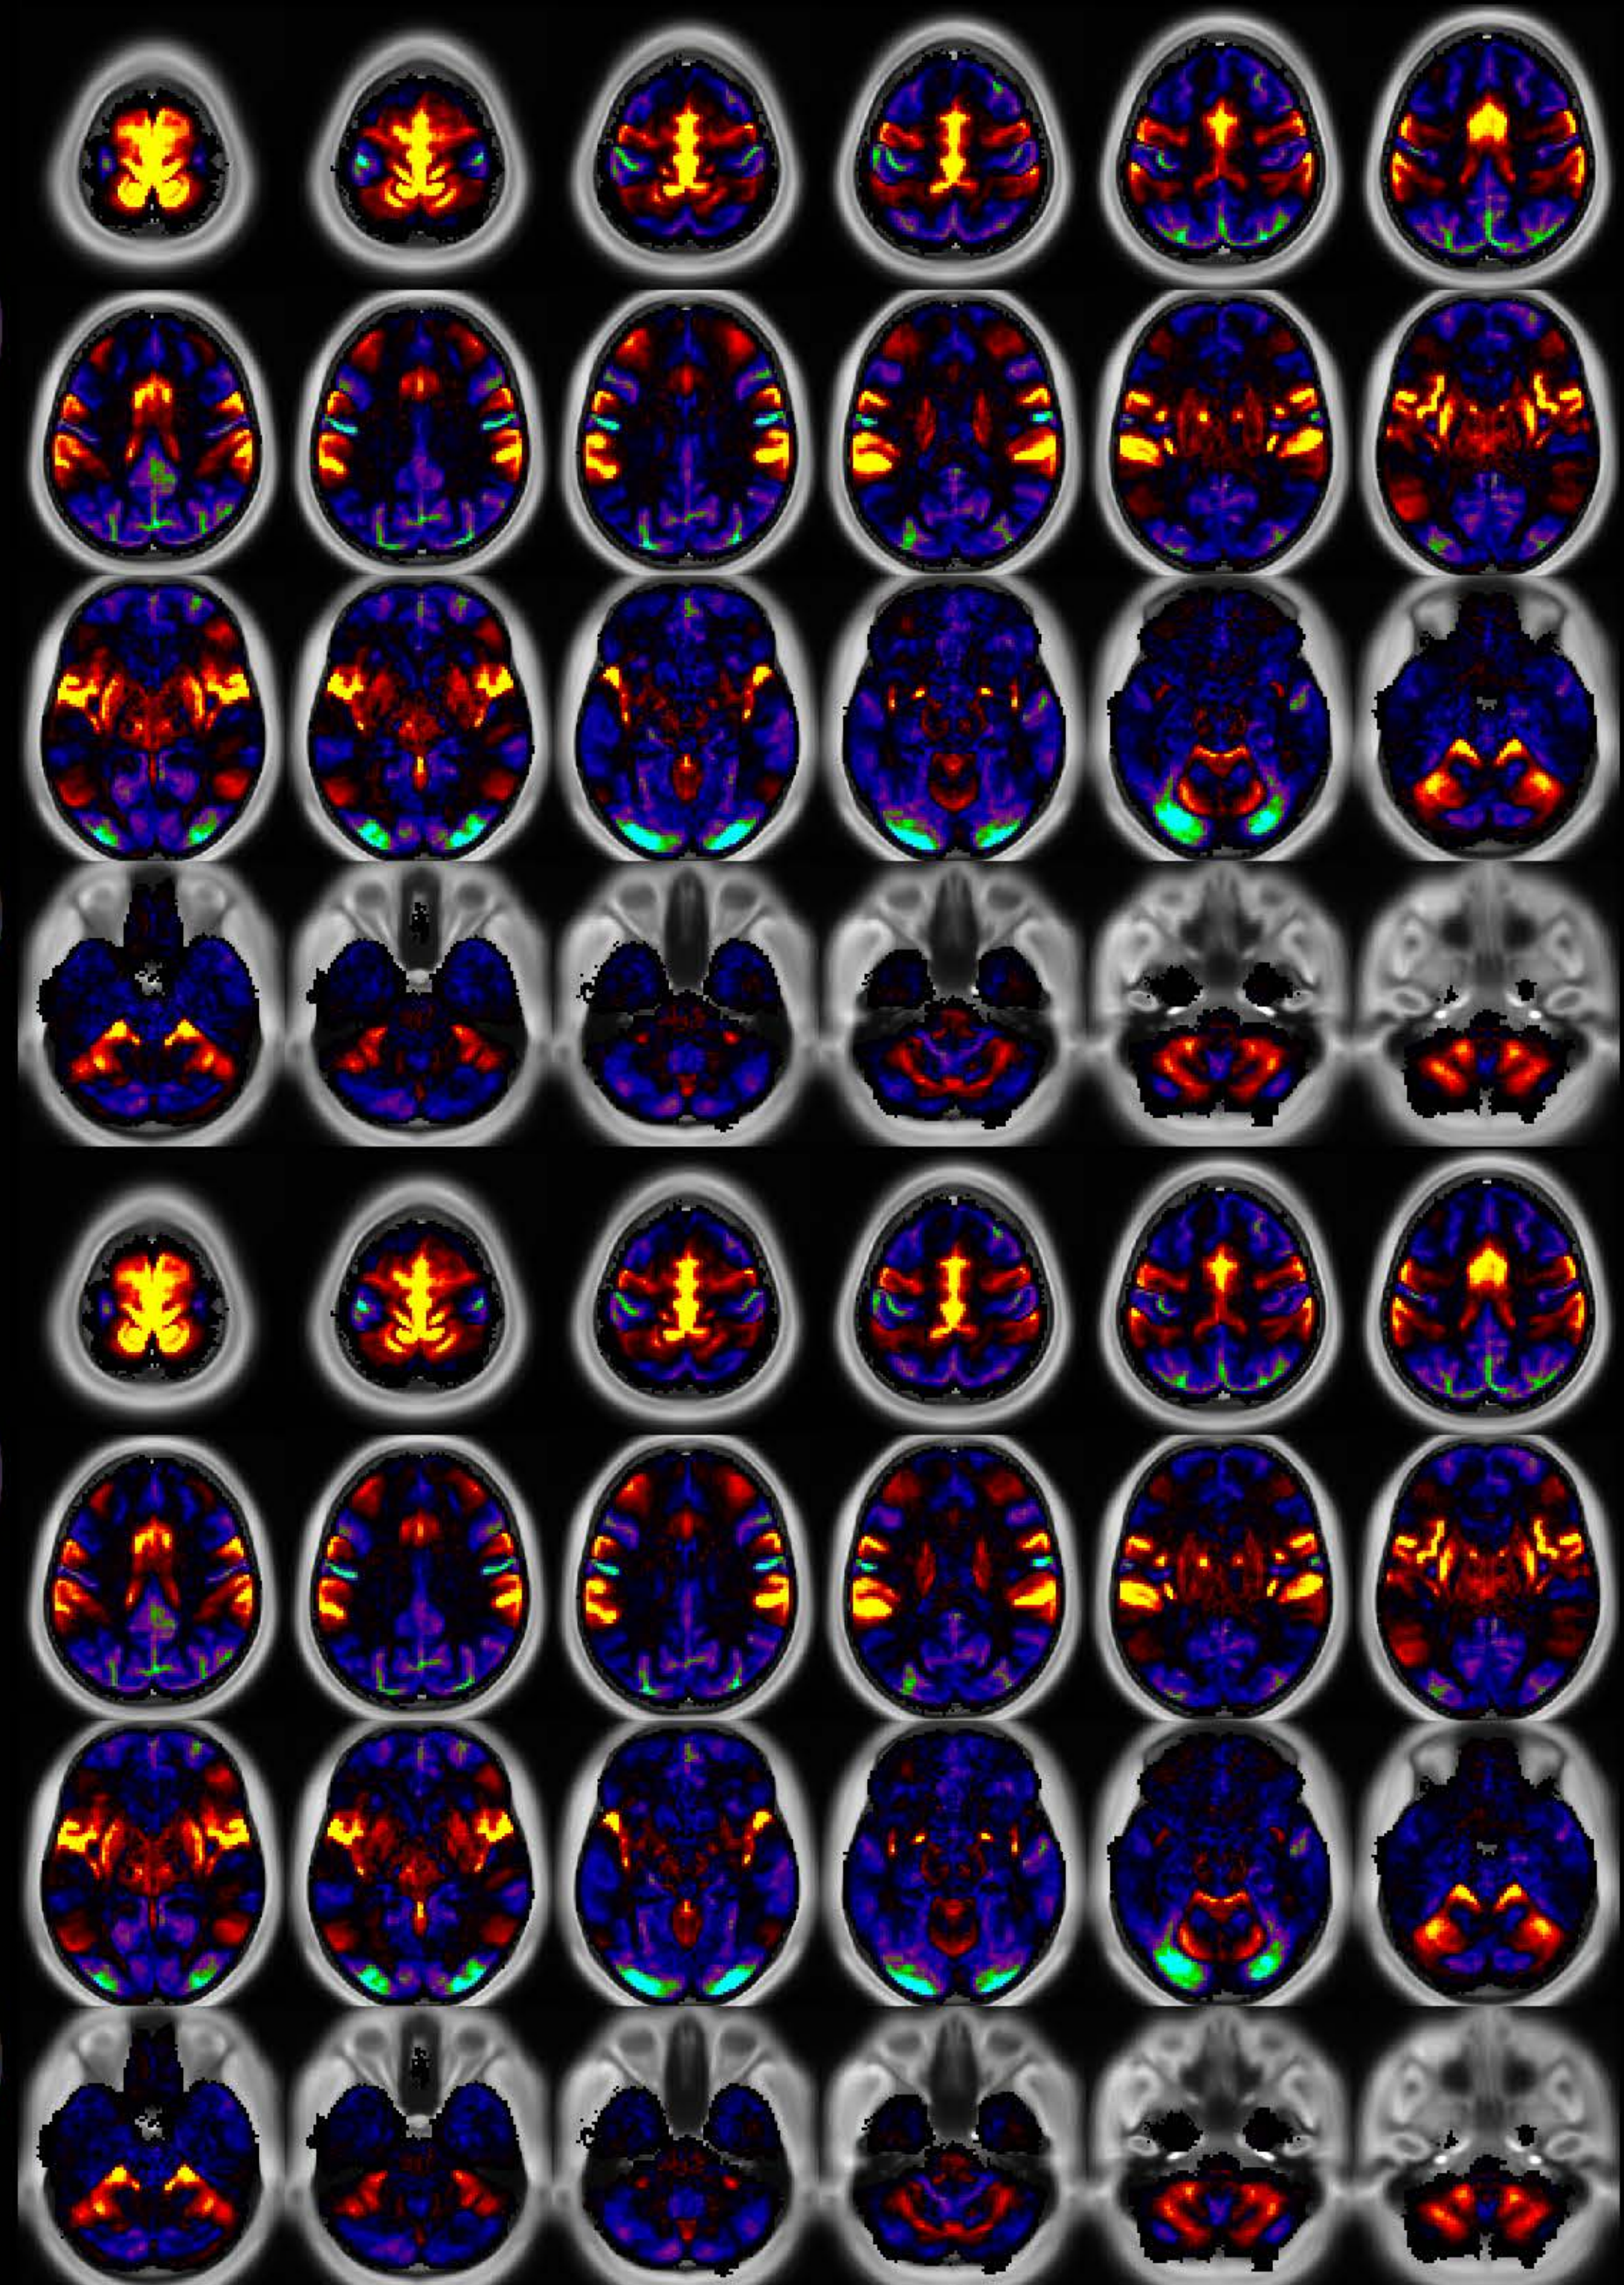

Seconds

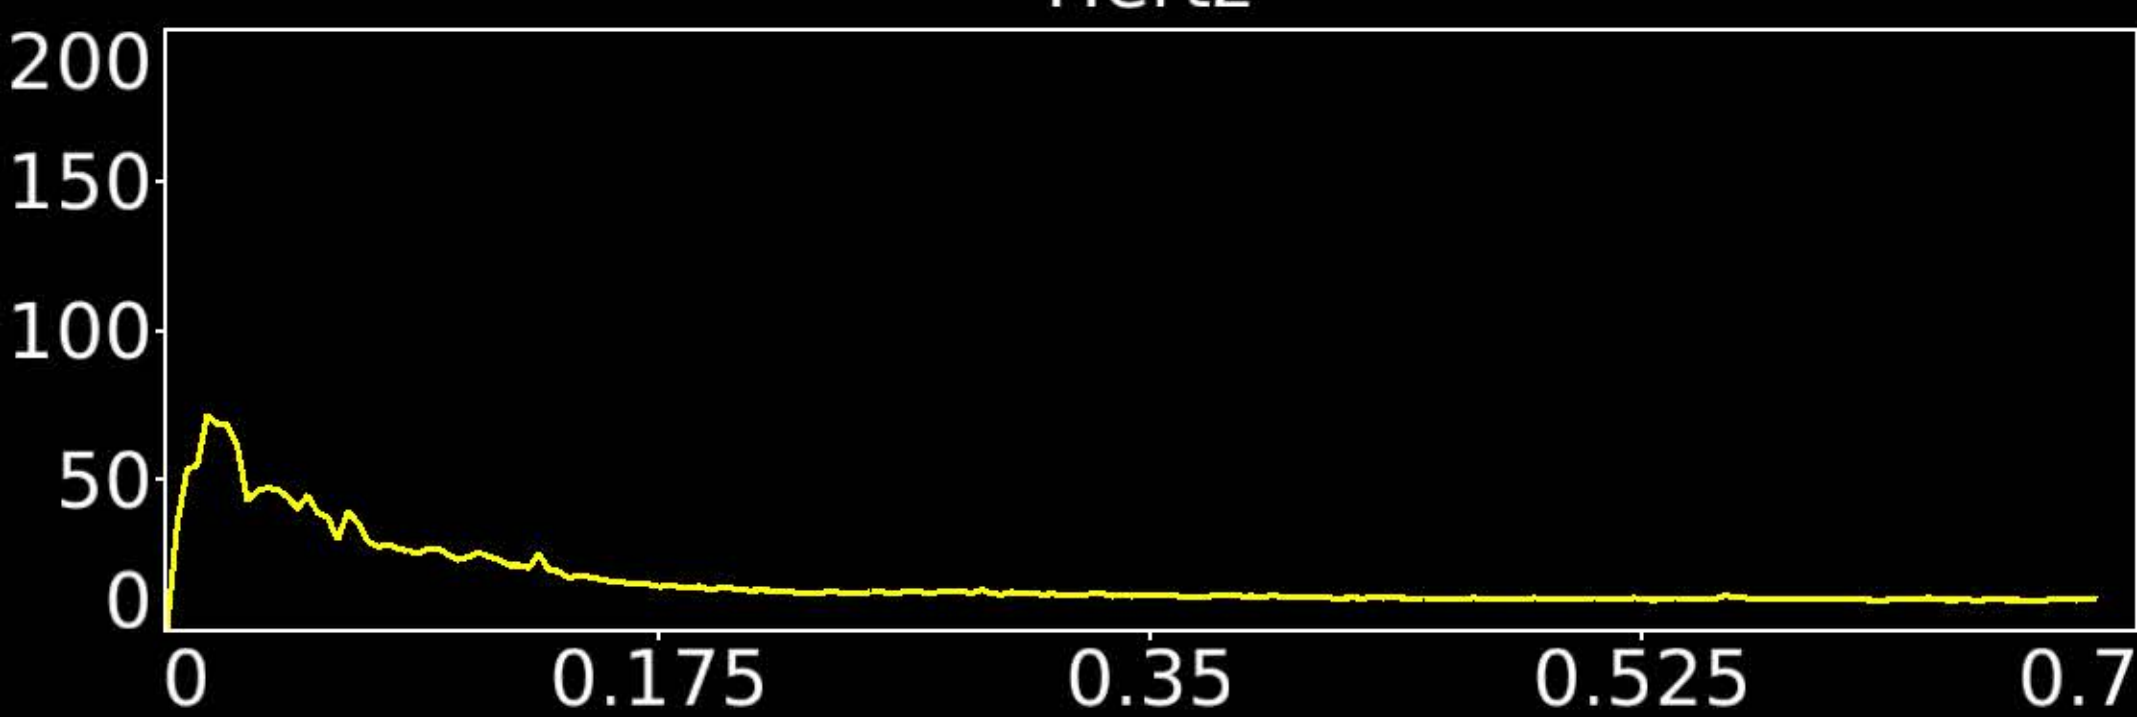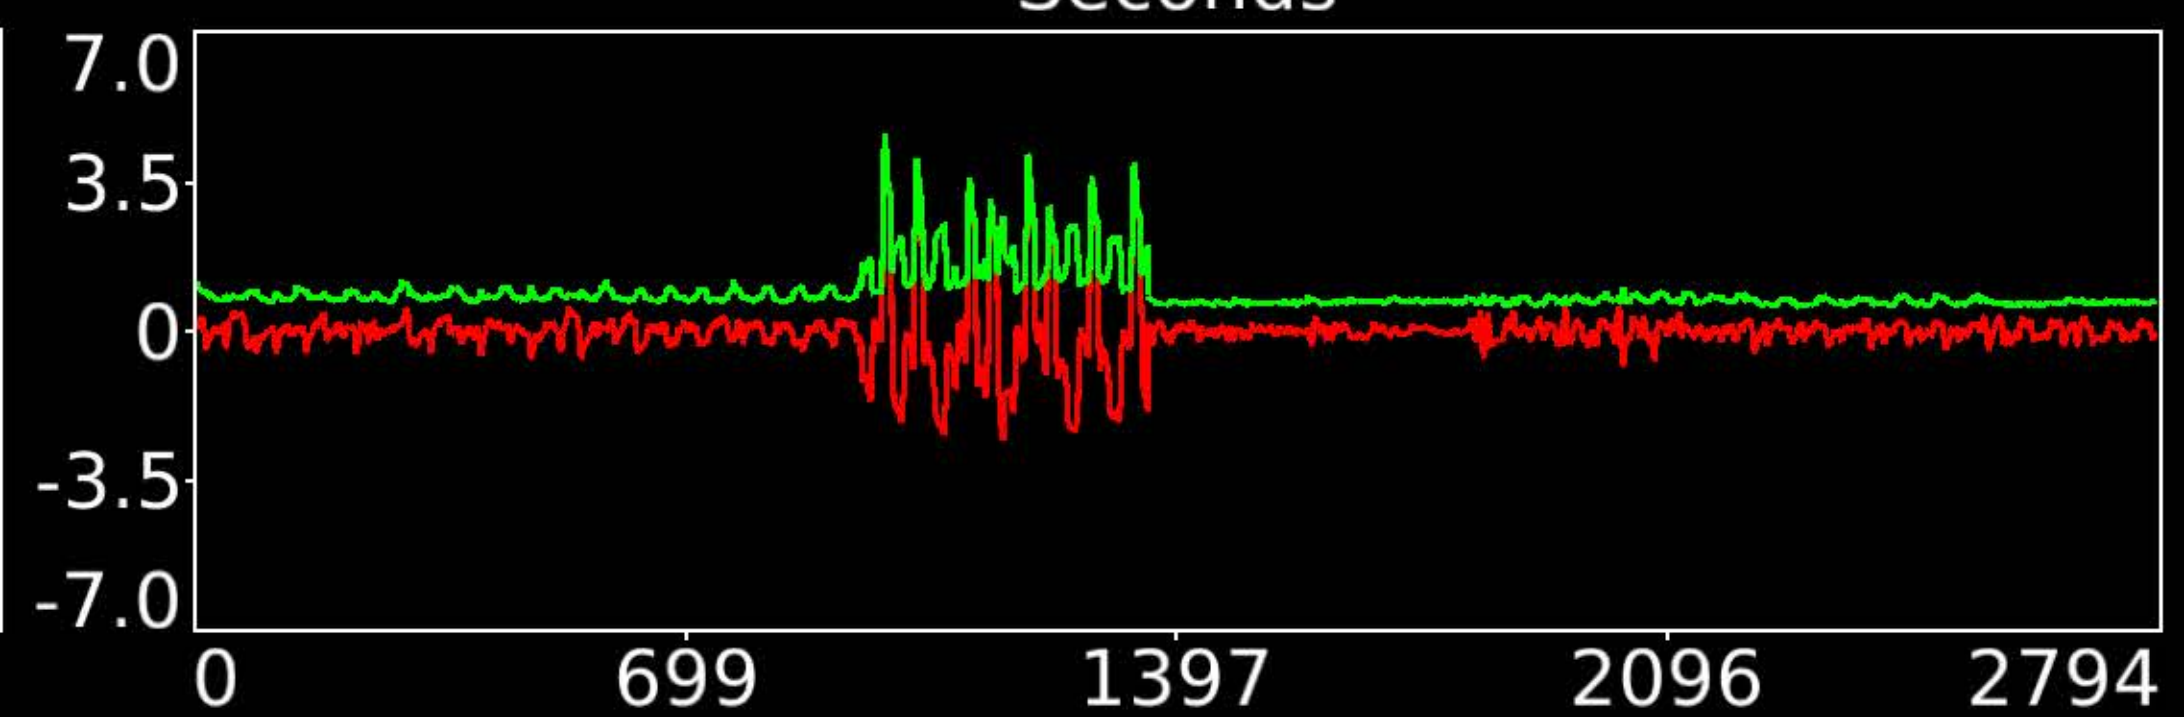

|                           |                           |                             |  |
|---------------------------|---------------------------|-----------------------------|--|
| Number & Class: 19 Signal |                           | Name: Feet Motor Network    |  |
| RVT Correlated: No        | DVARS Dip Associated: Yes | Cross-Subject Variable: Yes |  |
| Single Subject: No        | % Variance Explained: 1.7 | Globality Index: 0.48       |  |
| Rest Component: 48        | Taskr Component: 24       | Task Modulated: Motor       |  |

Rationale: Spatial map includes positive and negative patches that respect known somatotopic sensori-motor organization (Feet)



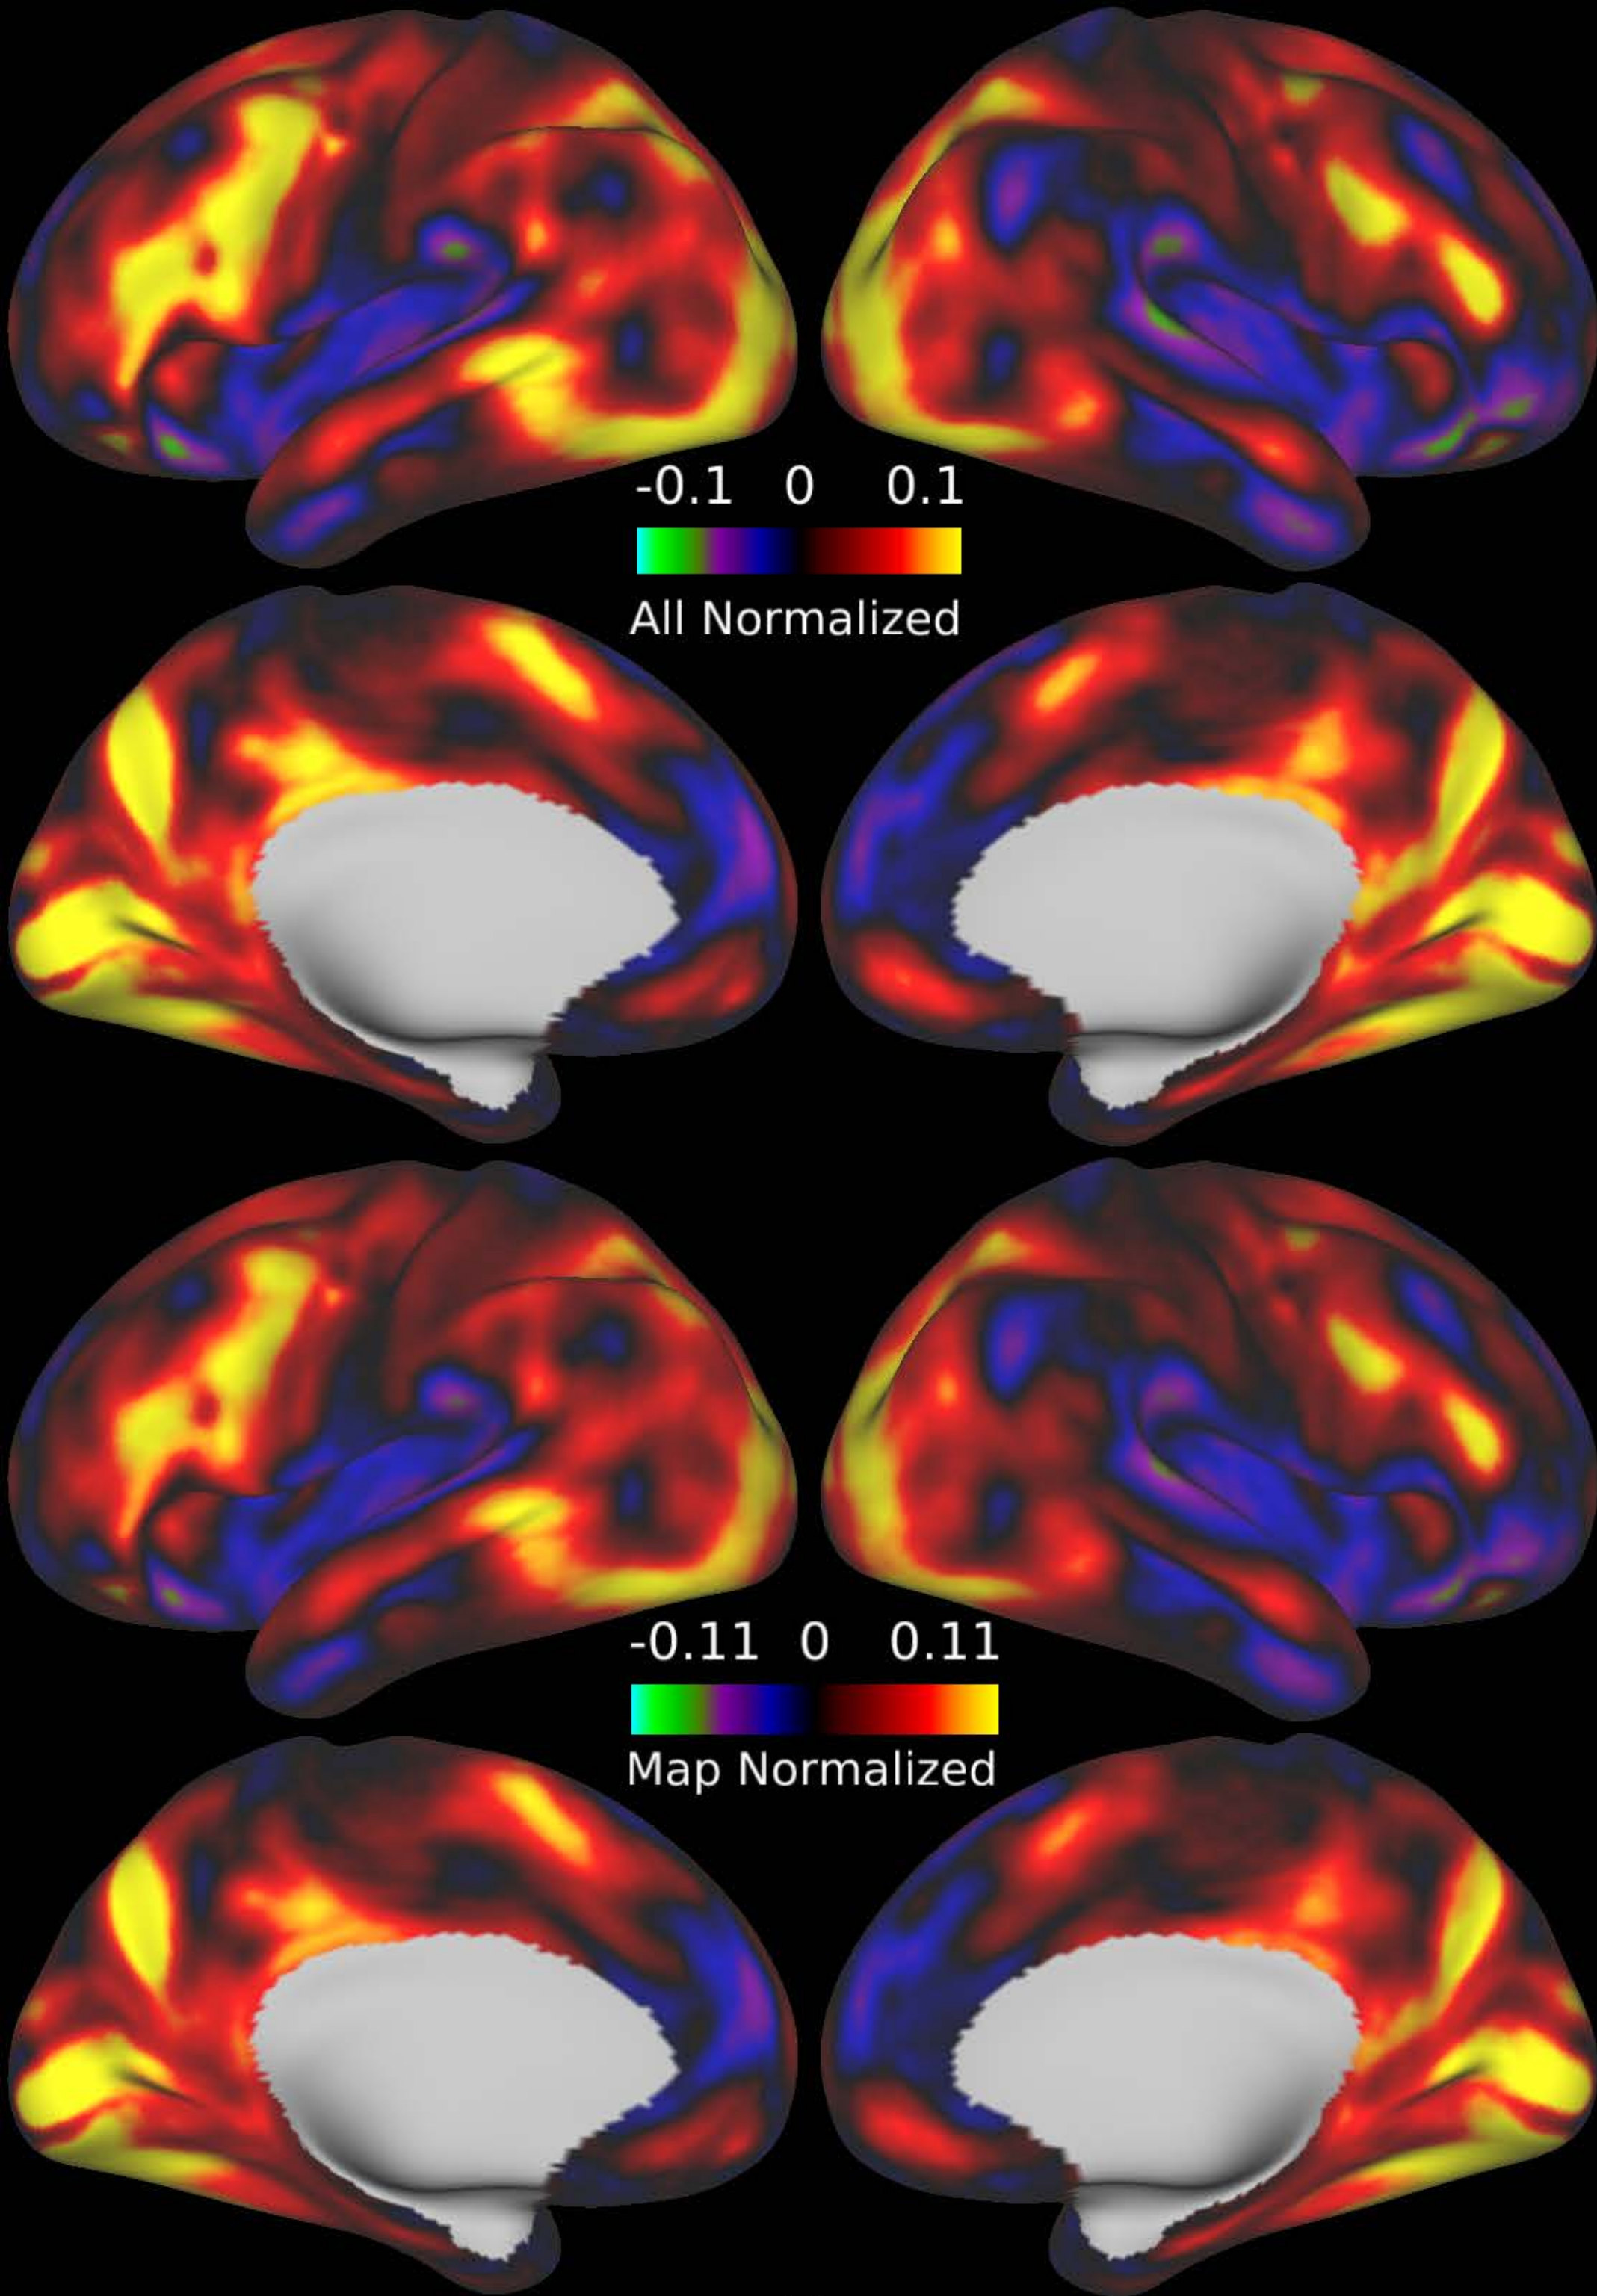

Hertz

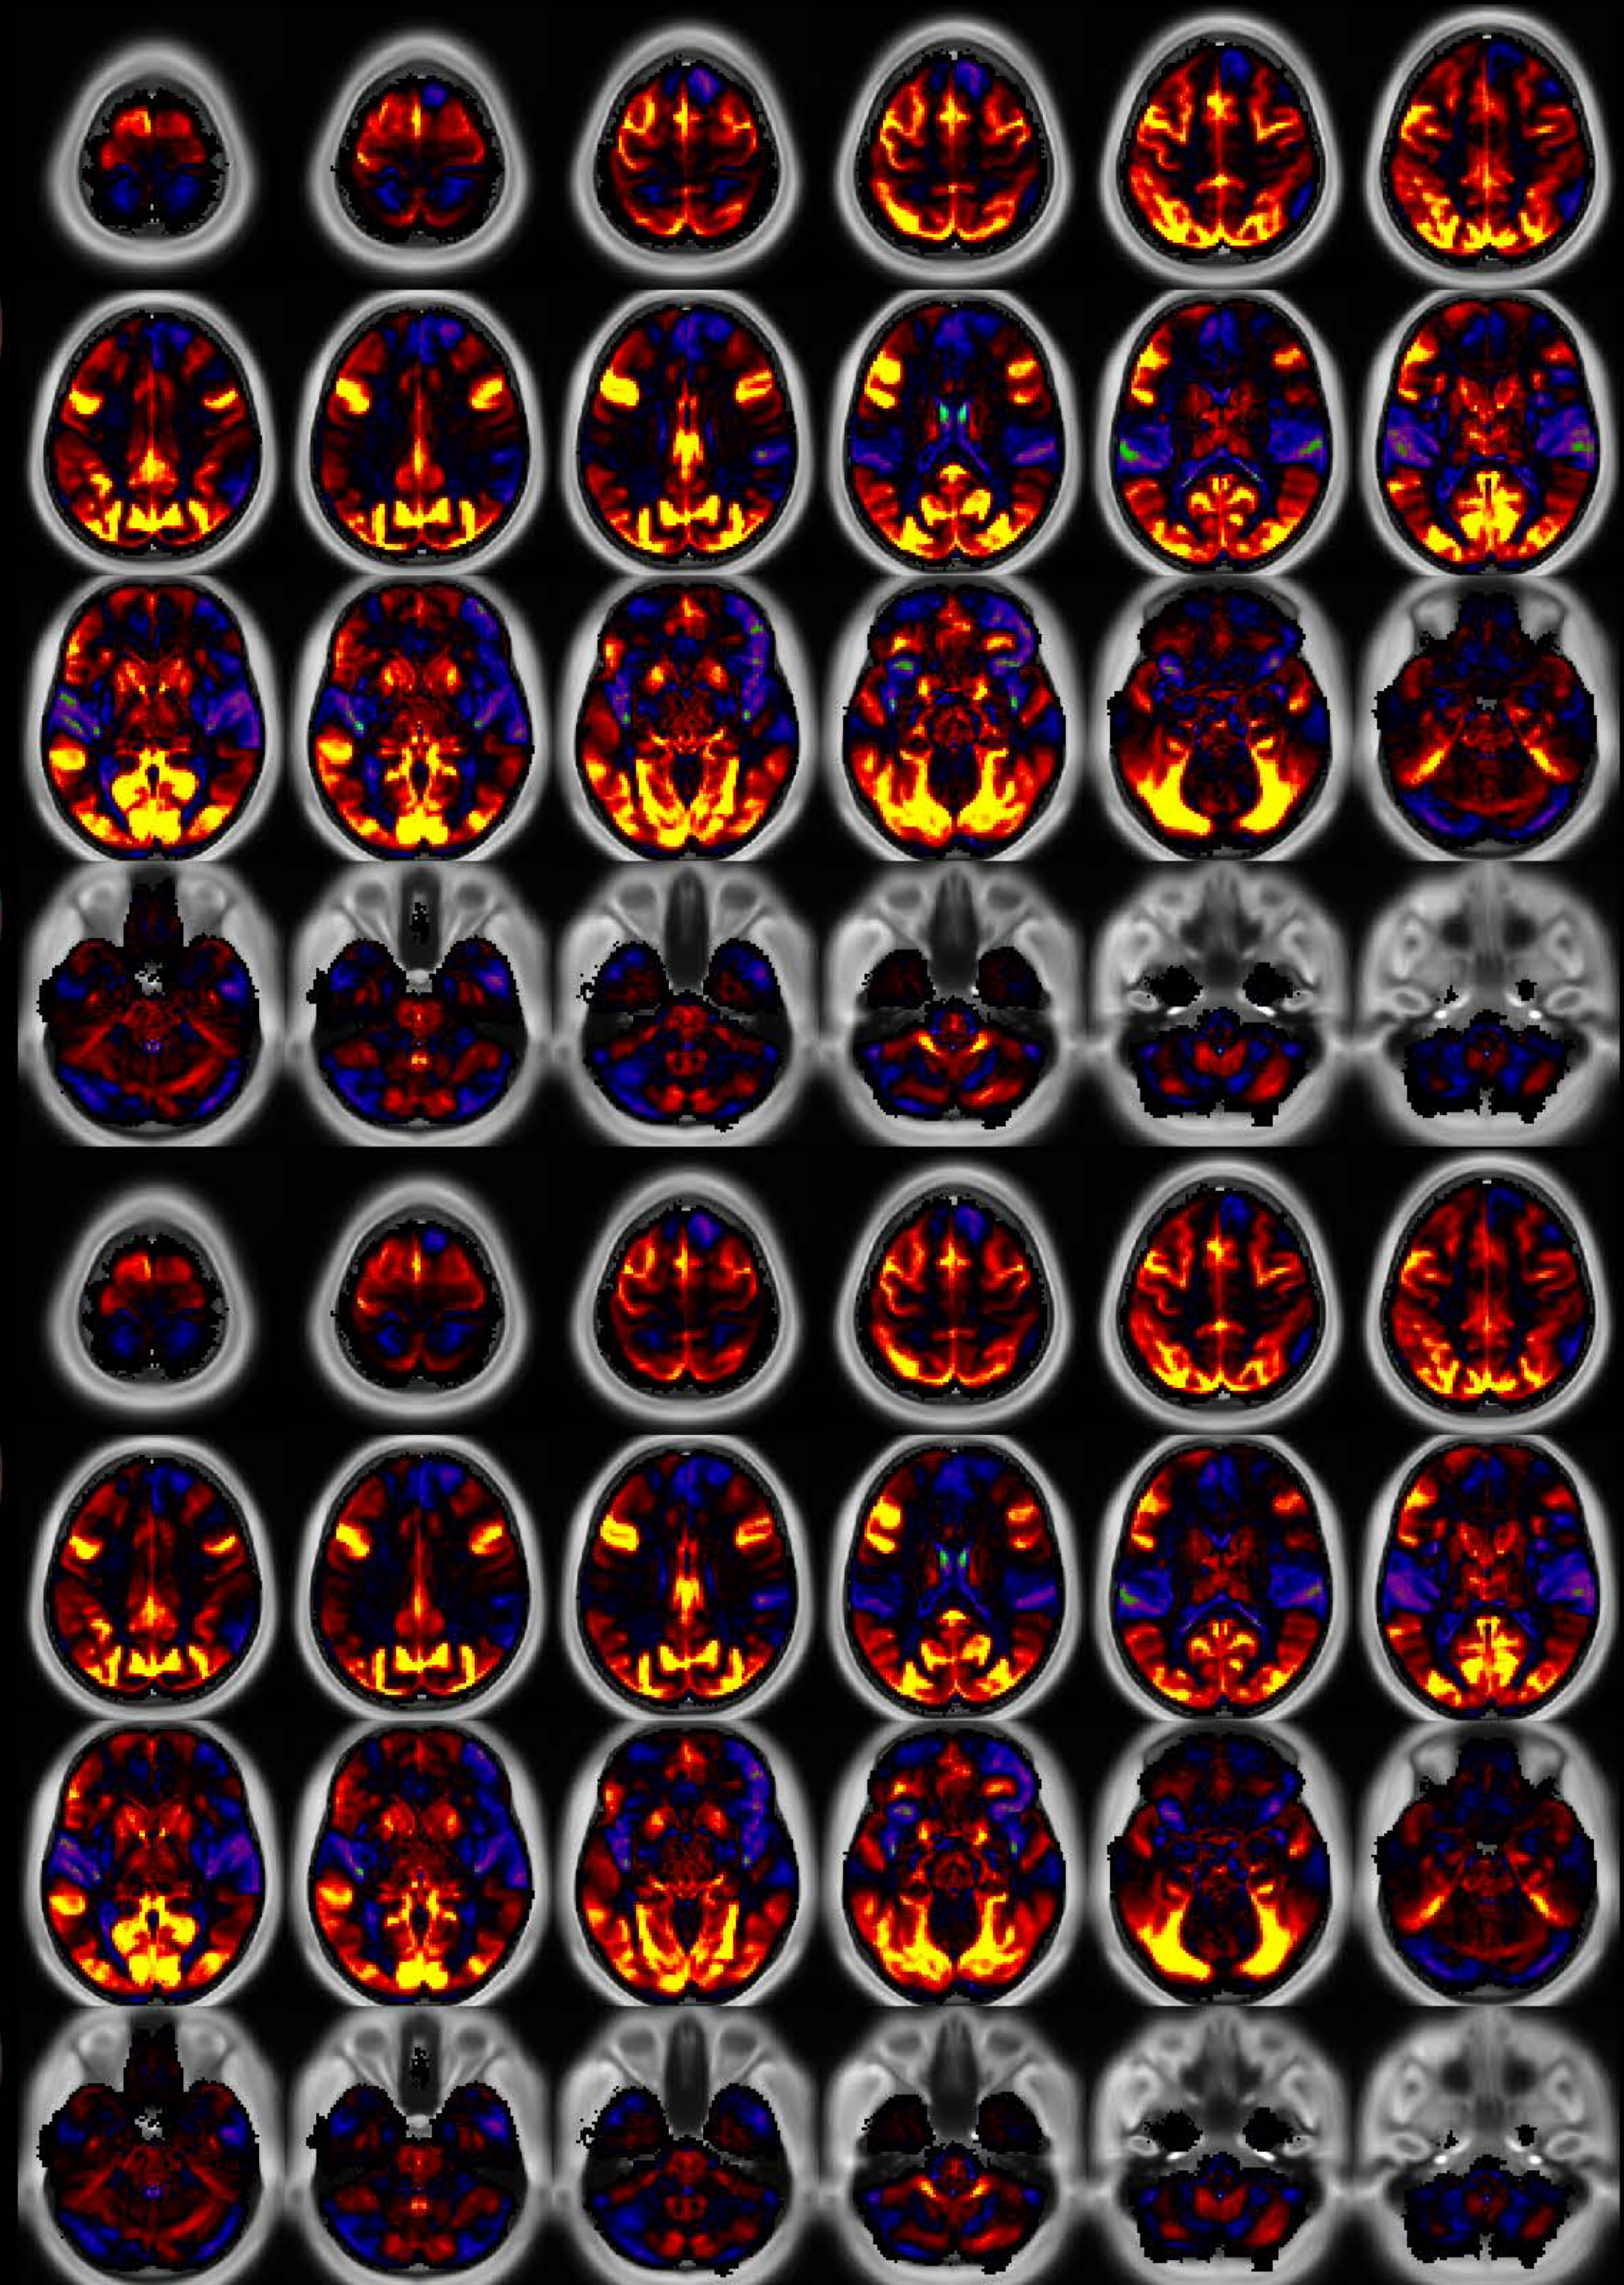

Seconds

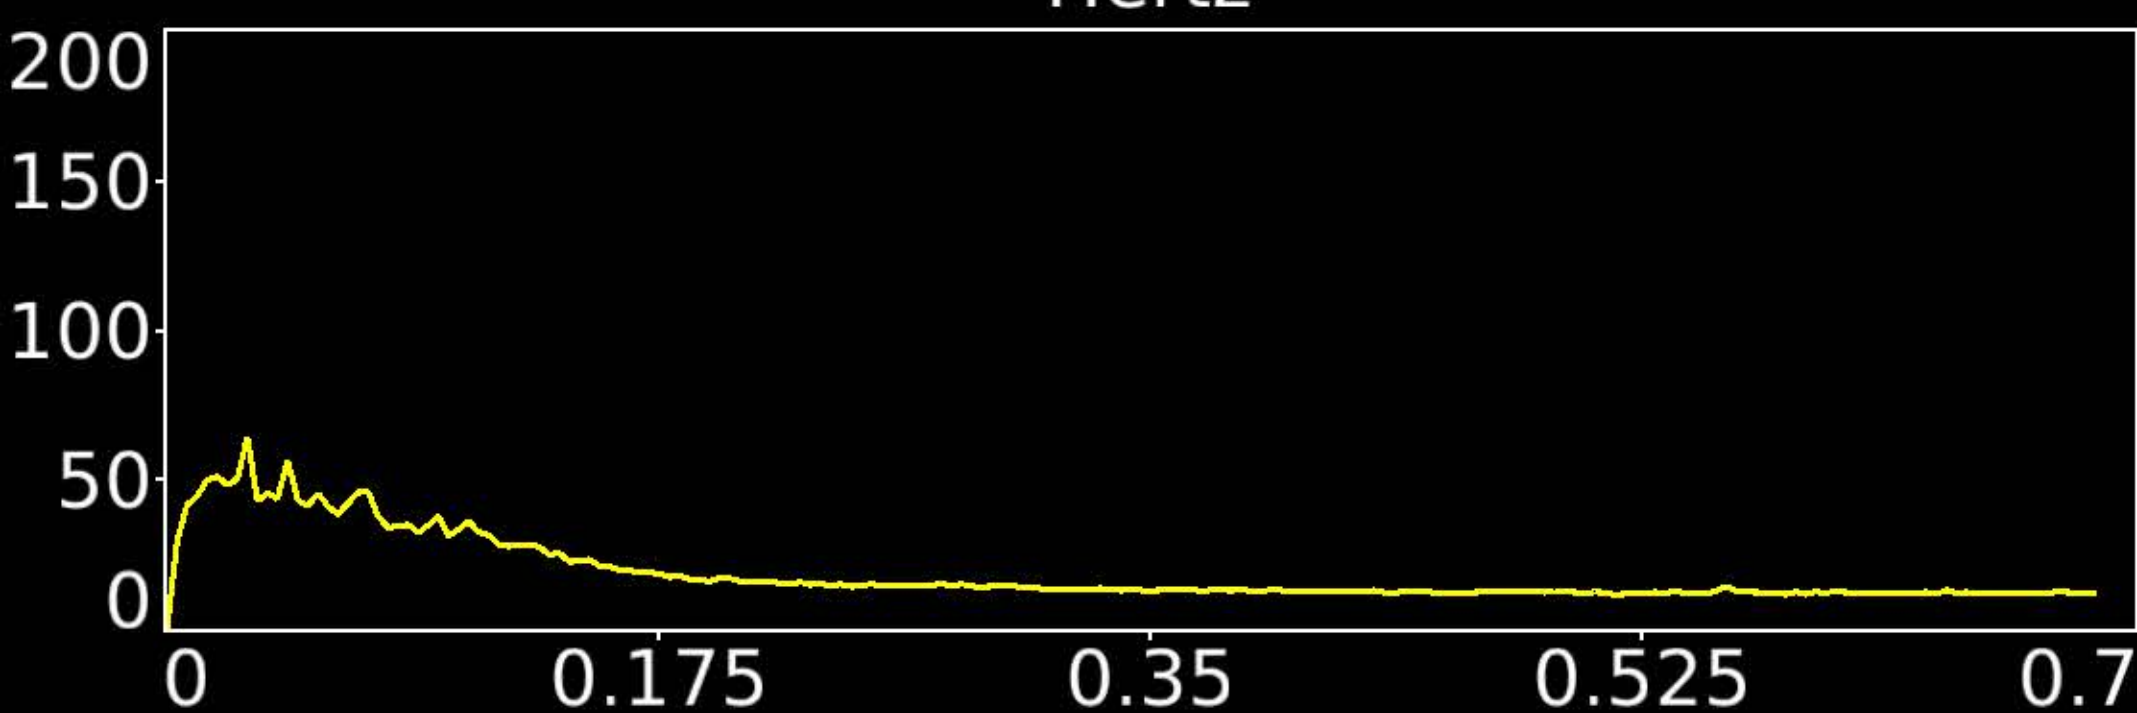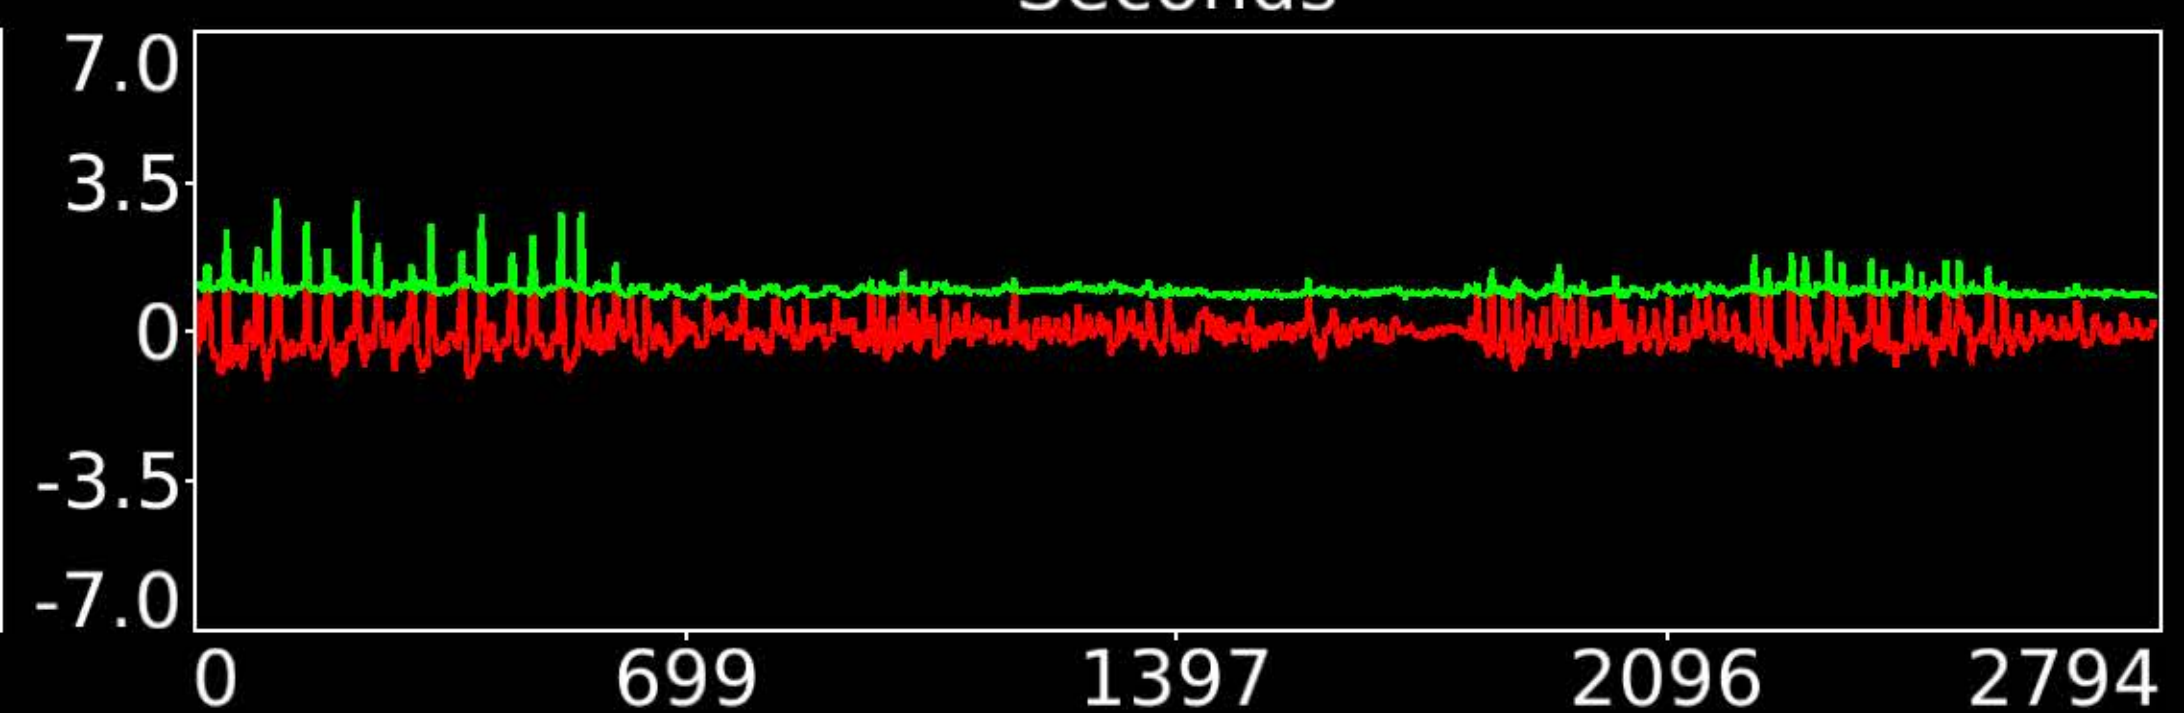

|                           |                            |                            |  |
|---------------------------|----------------------------|----------------------------|--|
| Number & Class: 20 Signal |                            | Name: Unknown Network      |  |
| RVT Correlated: No        | DVARS Dip Associated: No   | Cross-Subject Variable: No |  |
| Single Subject: No        | % Variance Explained: 1.62 | Globality Index: 1.36      |  |
| Rest Component: No        | Taskr Component: No        | Task Modulated: No         |  |

Rationale: Spatial map includes positive and negative patches that respect known areal boundaries (e.g. POS2)



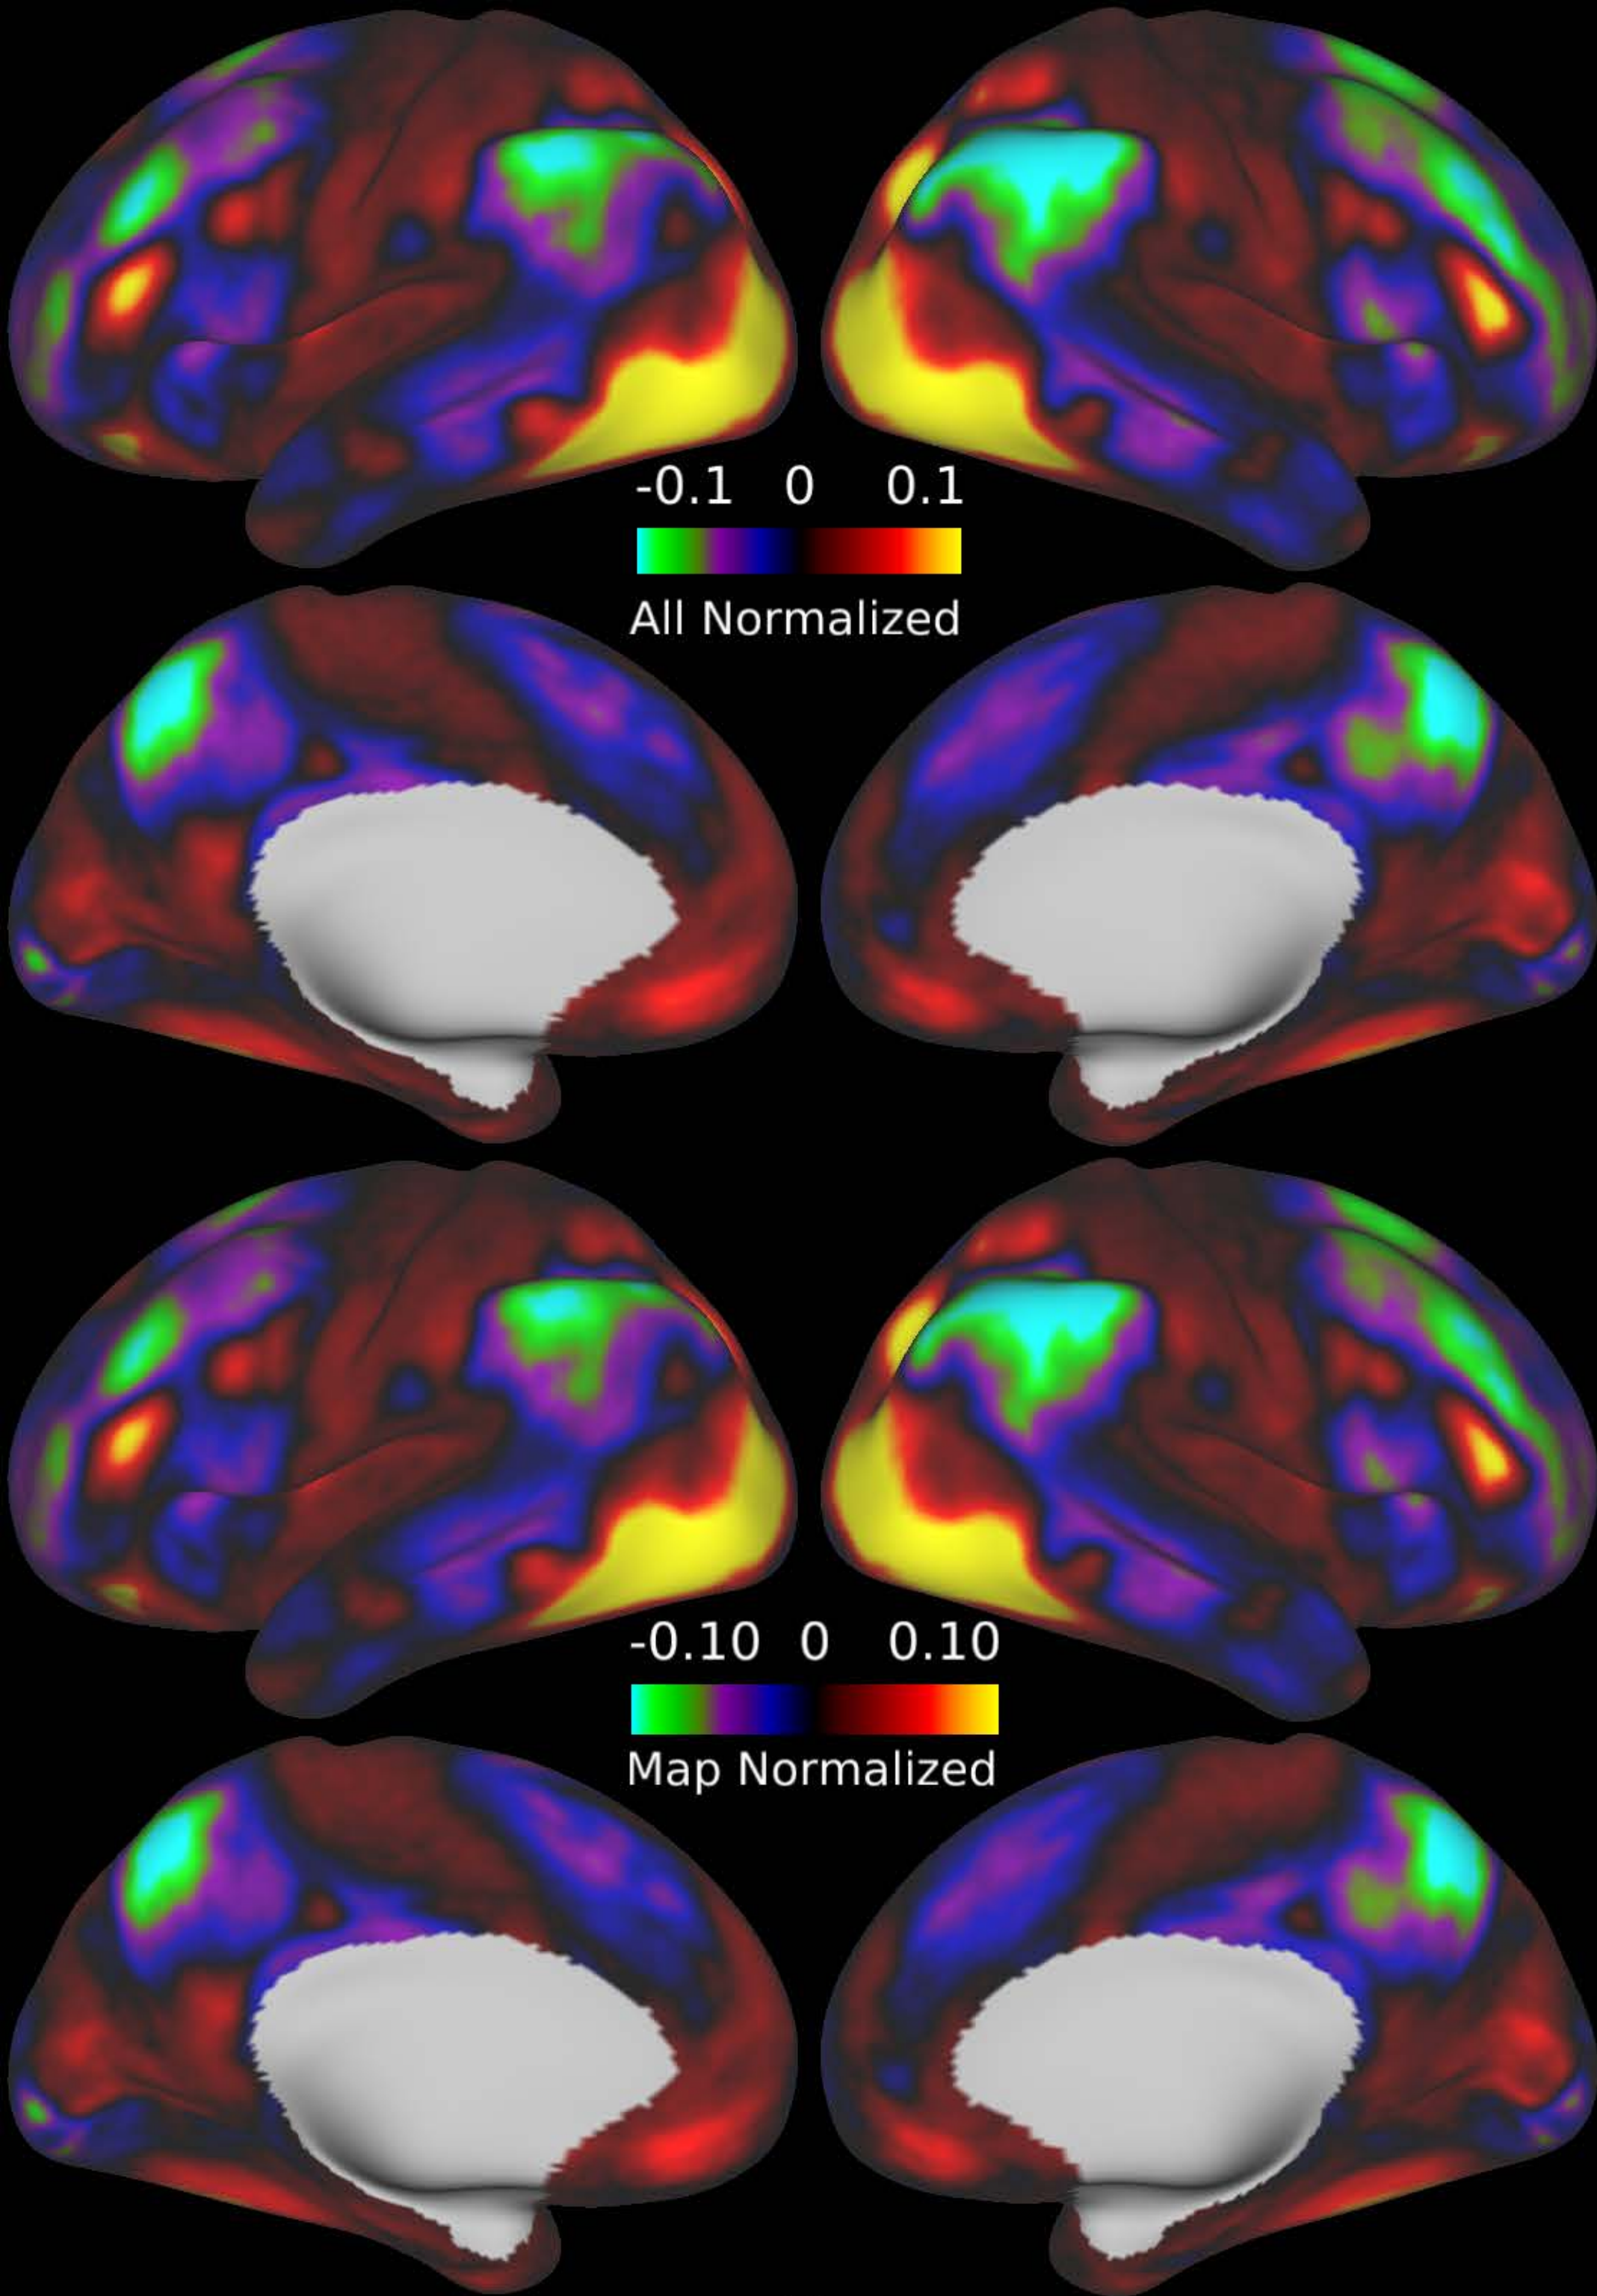

Hertz

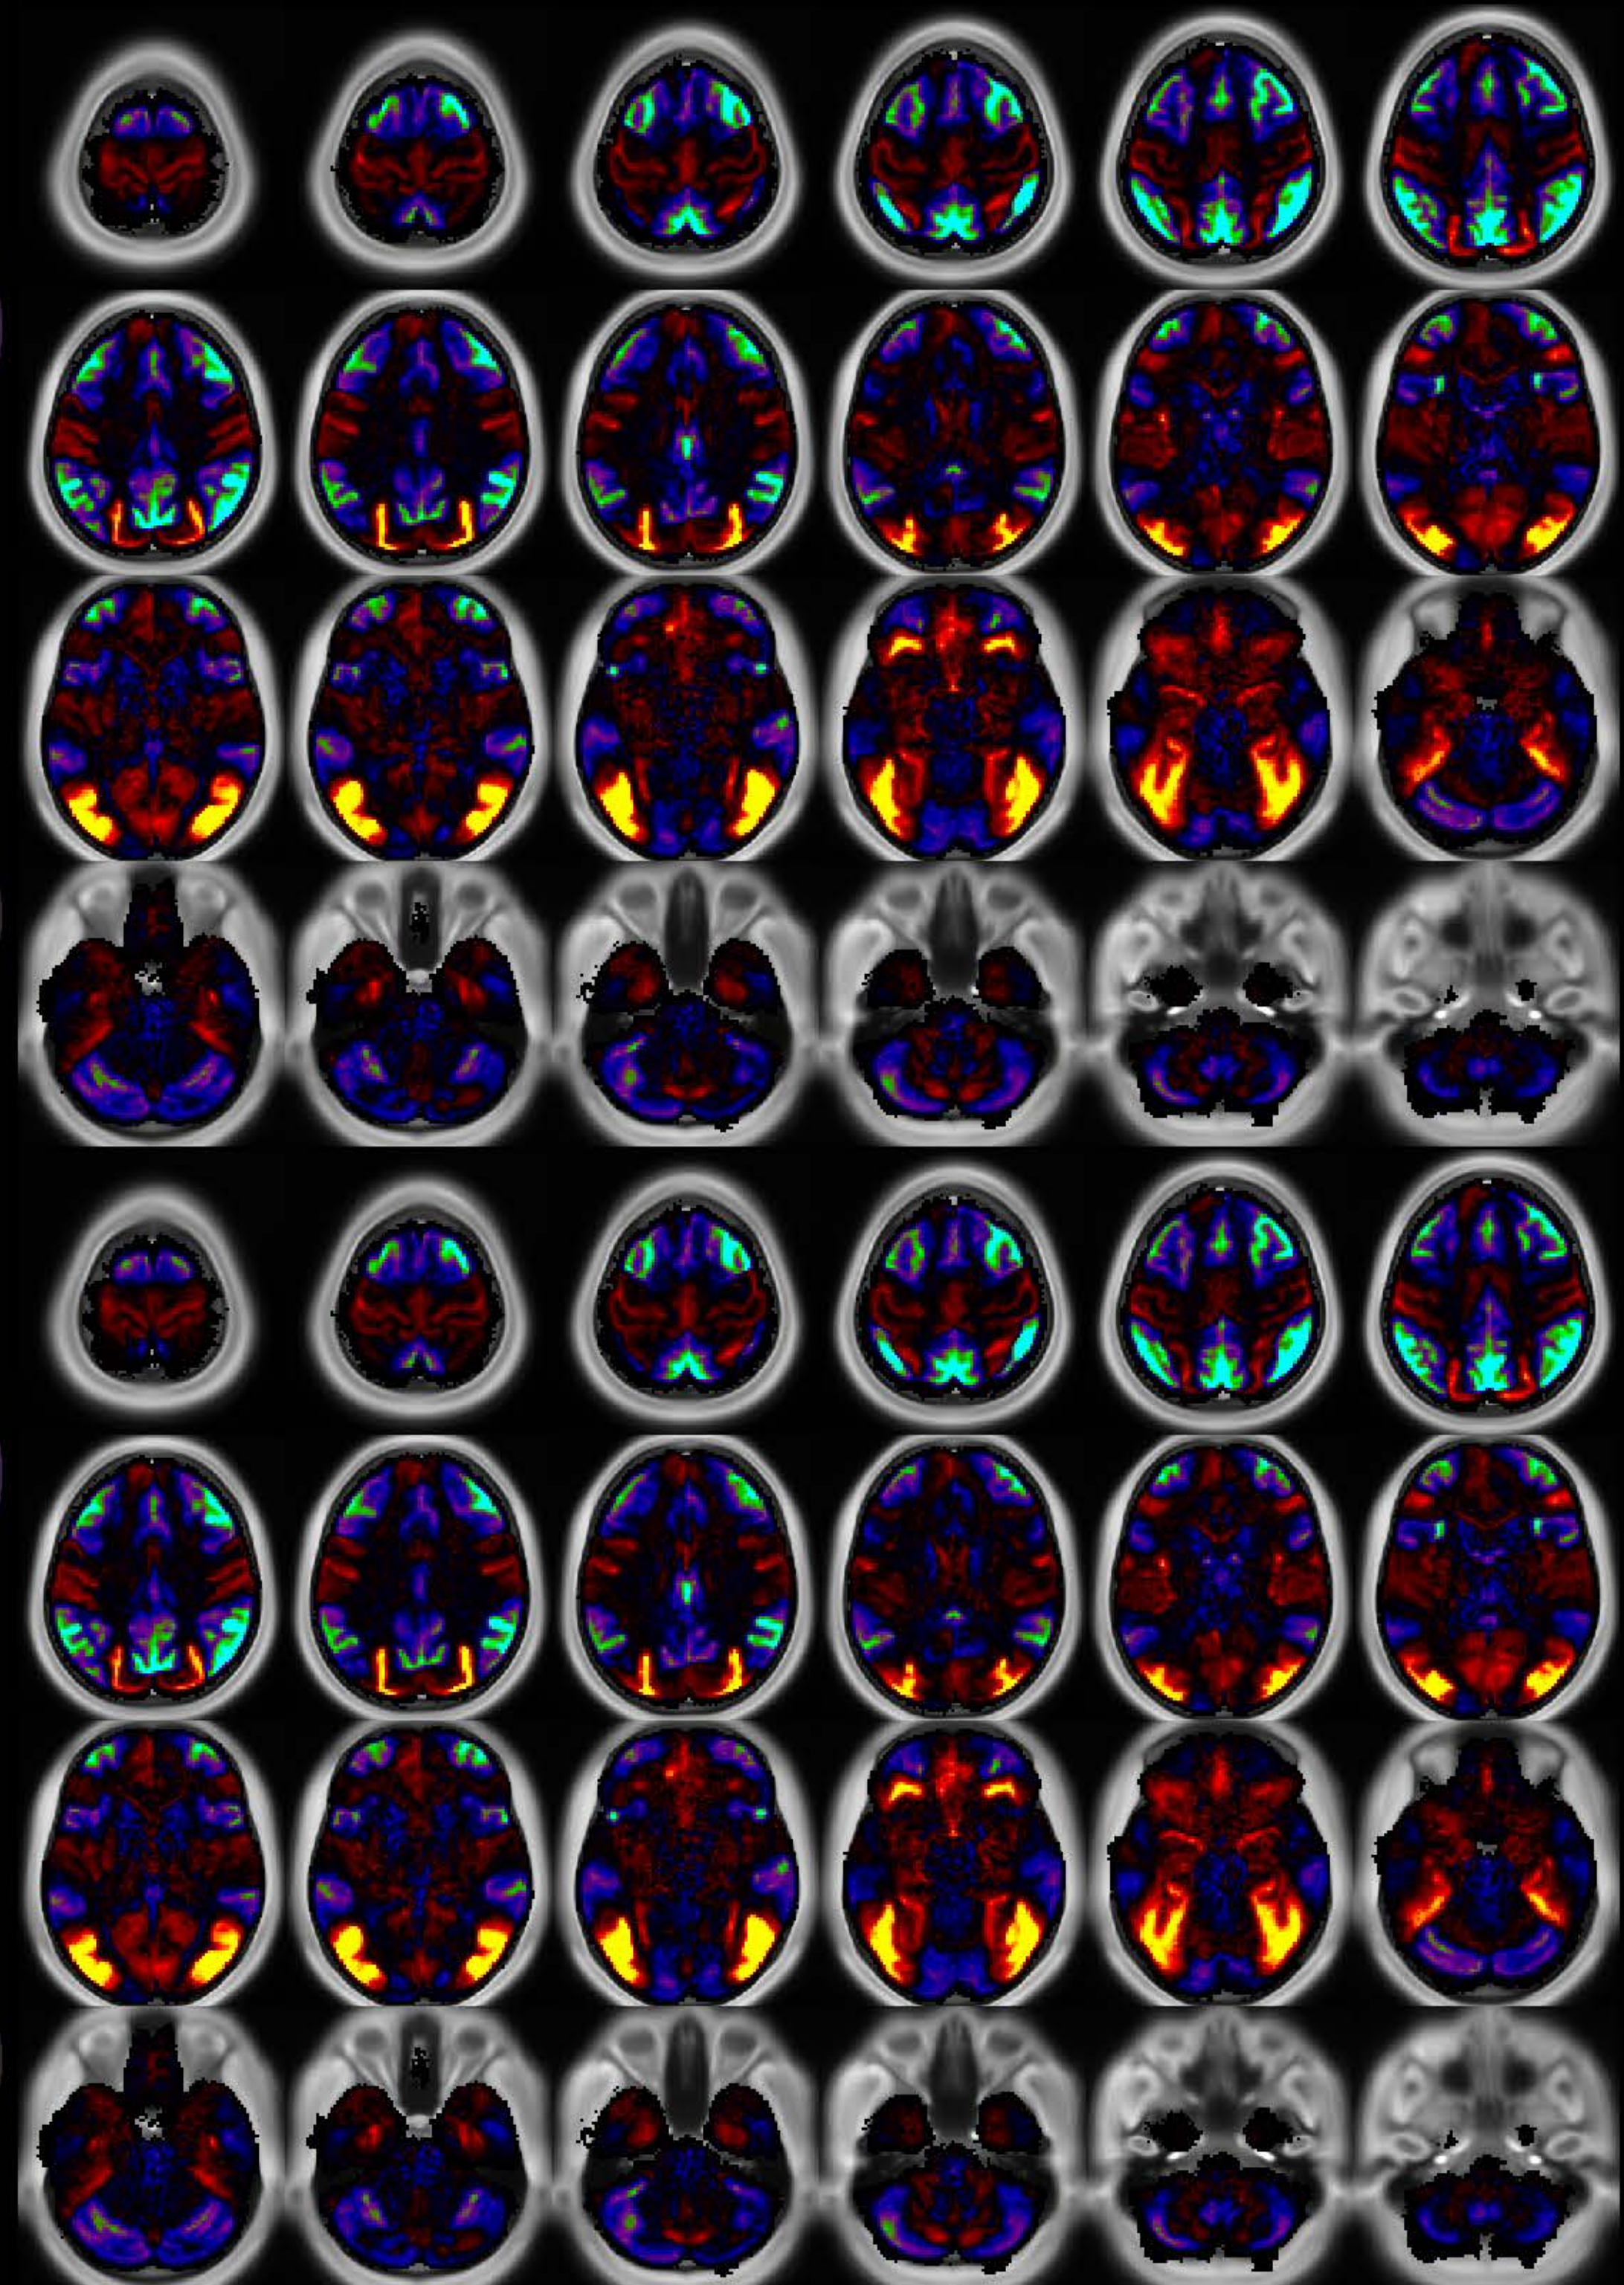

Seconds

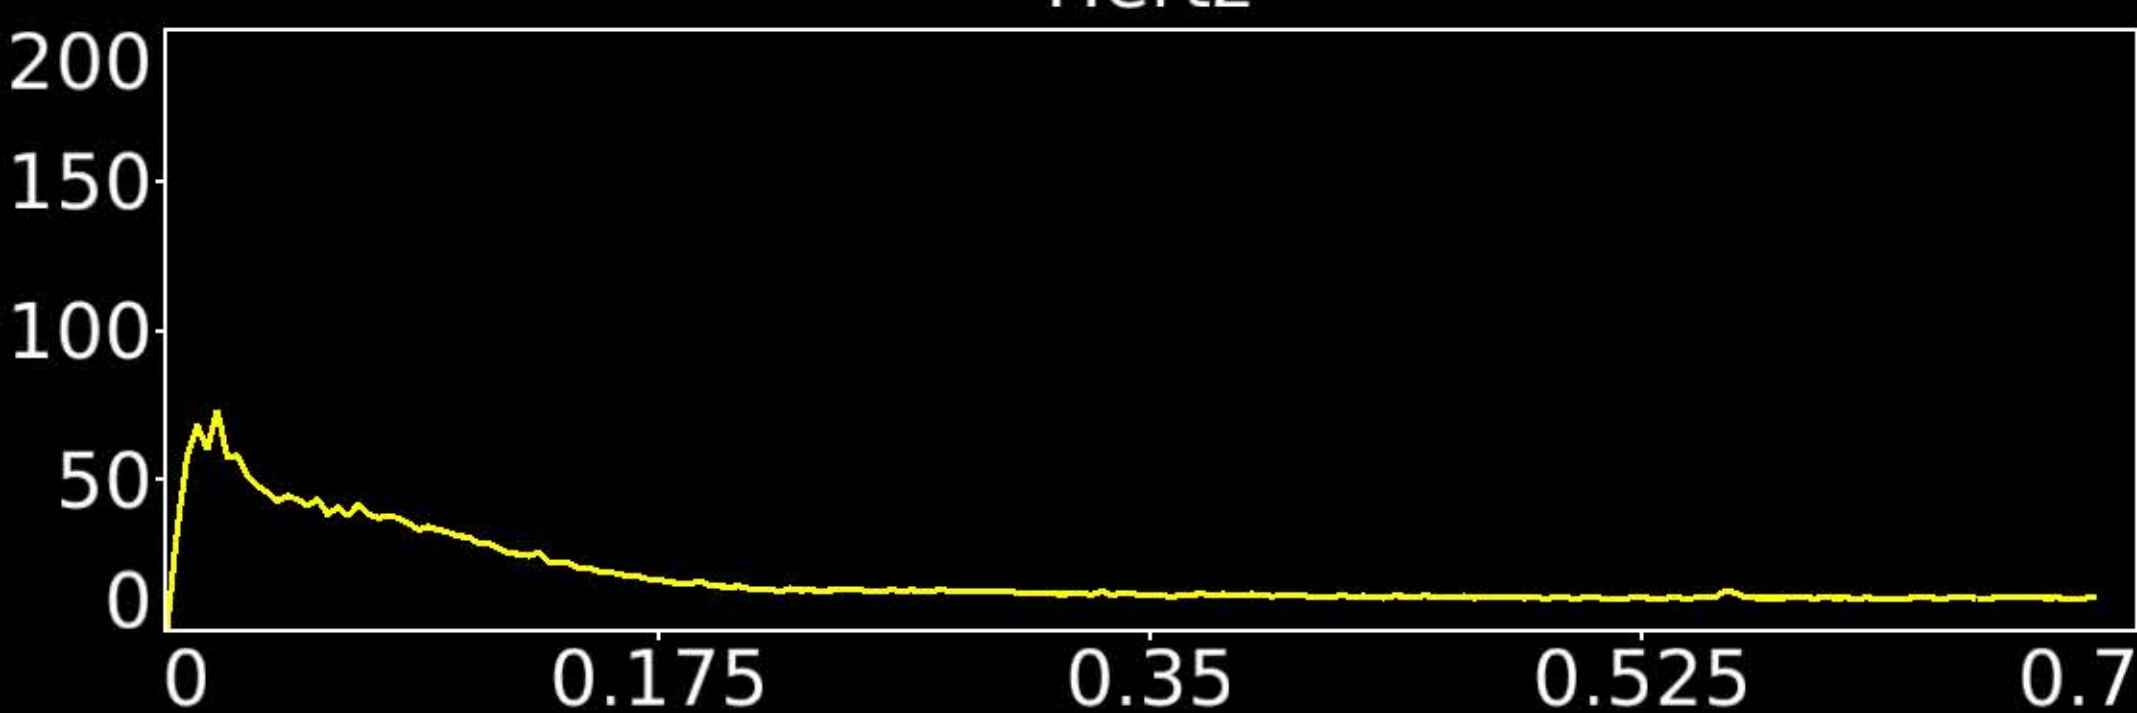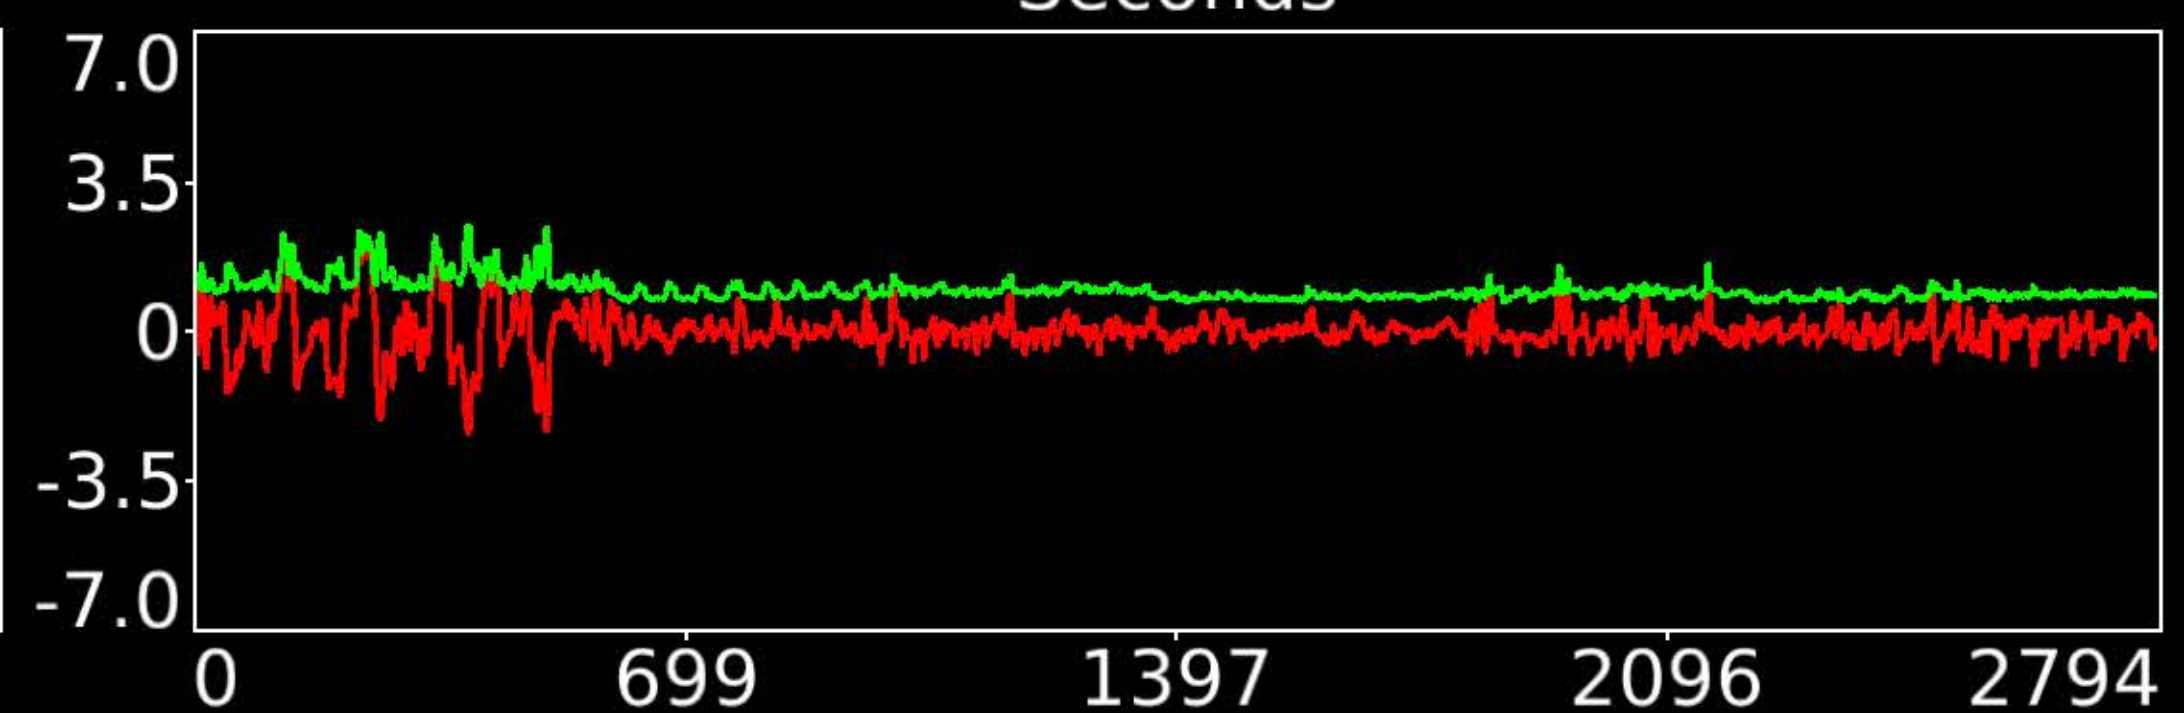

|                                                                                                               |                            |                                |  |
|---------------------------------------------------------------------------------------------------------------|----------------------------|--------------------------------|--|
| Number & Class: 21 Signal                                                                                     |                            | Name: Unknown Network          |  |
| RVT Correlated: No                                                                                            | DVARS Dip Associated: No   | Cross-Subject Variable: No     |  |
| Single Subject: No                                                                                            | % Variance Explained: 1.63 | Globality Index: 0.06          |  |
| Rest Component: No                                                                                            | Taskr Component: No        | Task Modulated: Working Memory |  |
| Rationale: Spatial map includes positive and negative patches that are correlated with a specific task design |                            |                                |  |



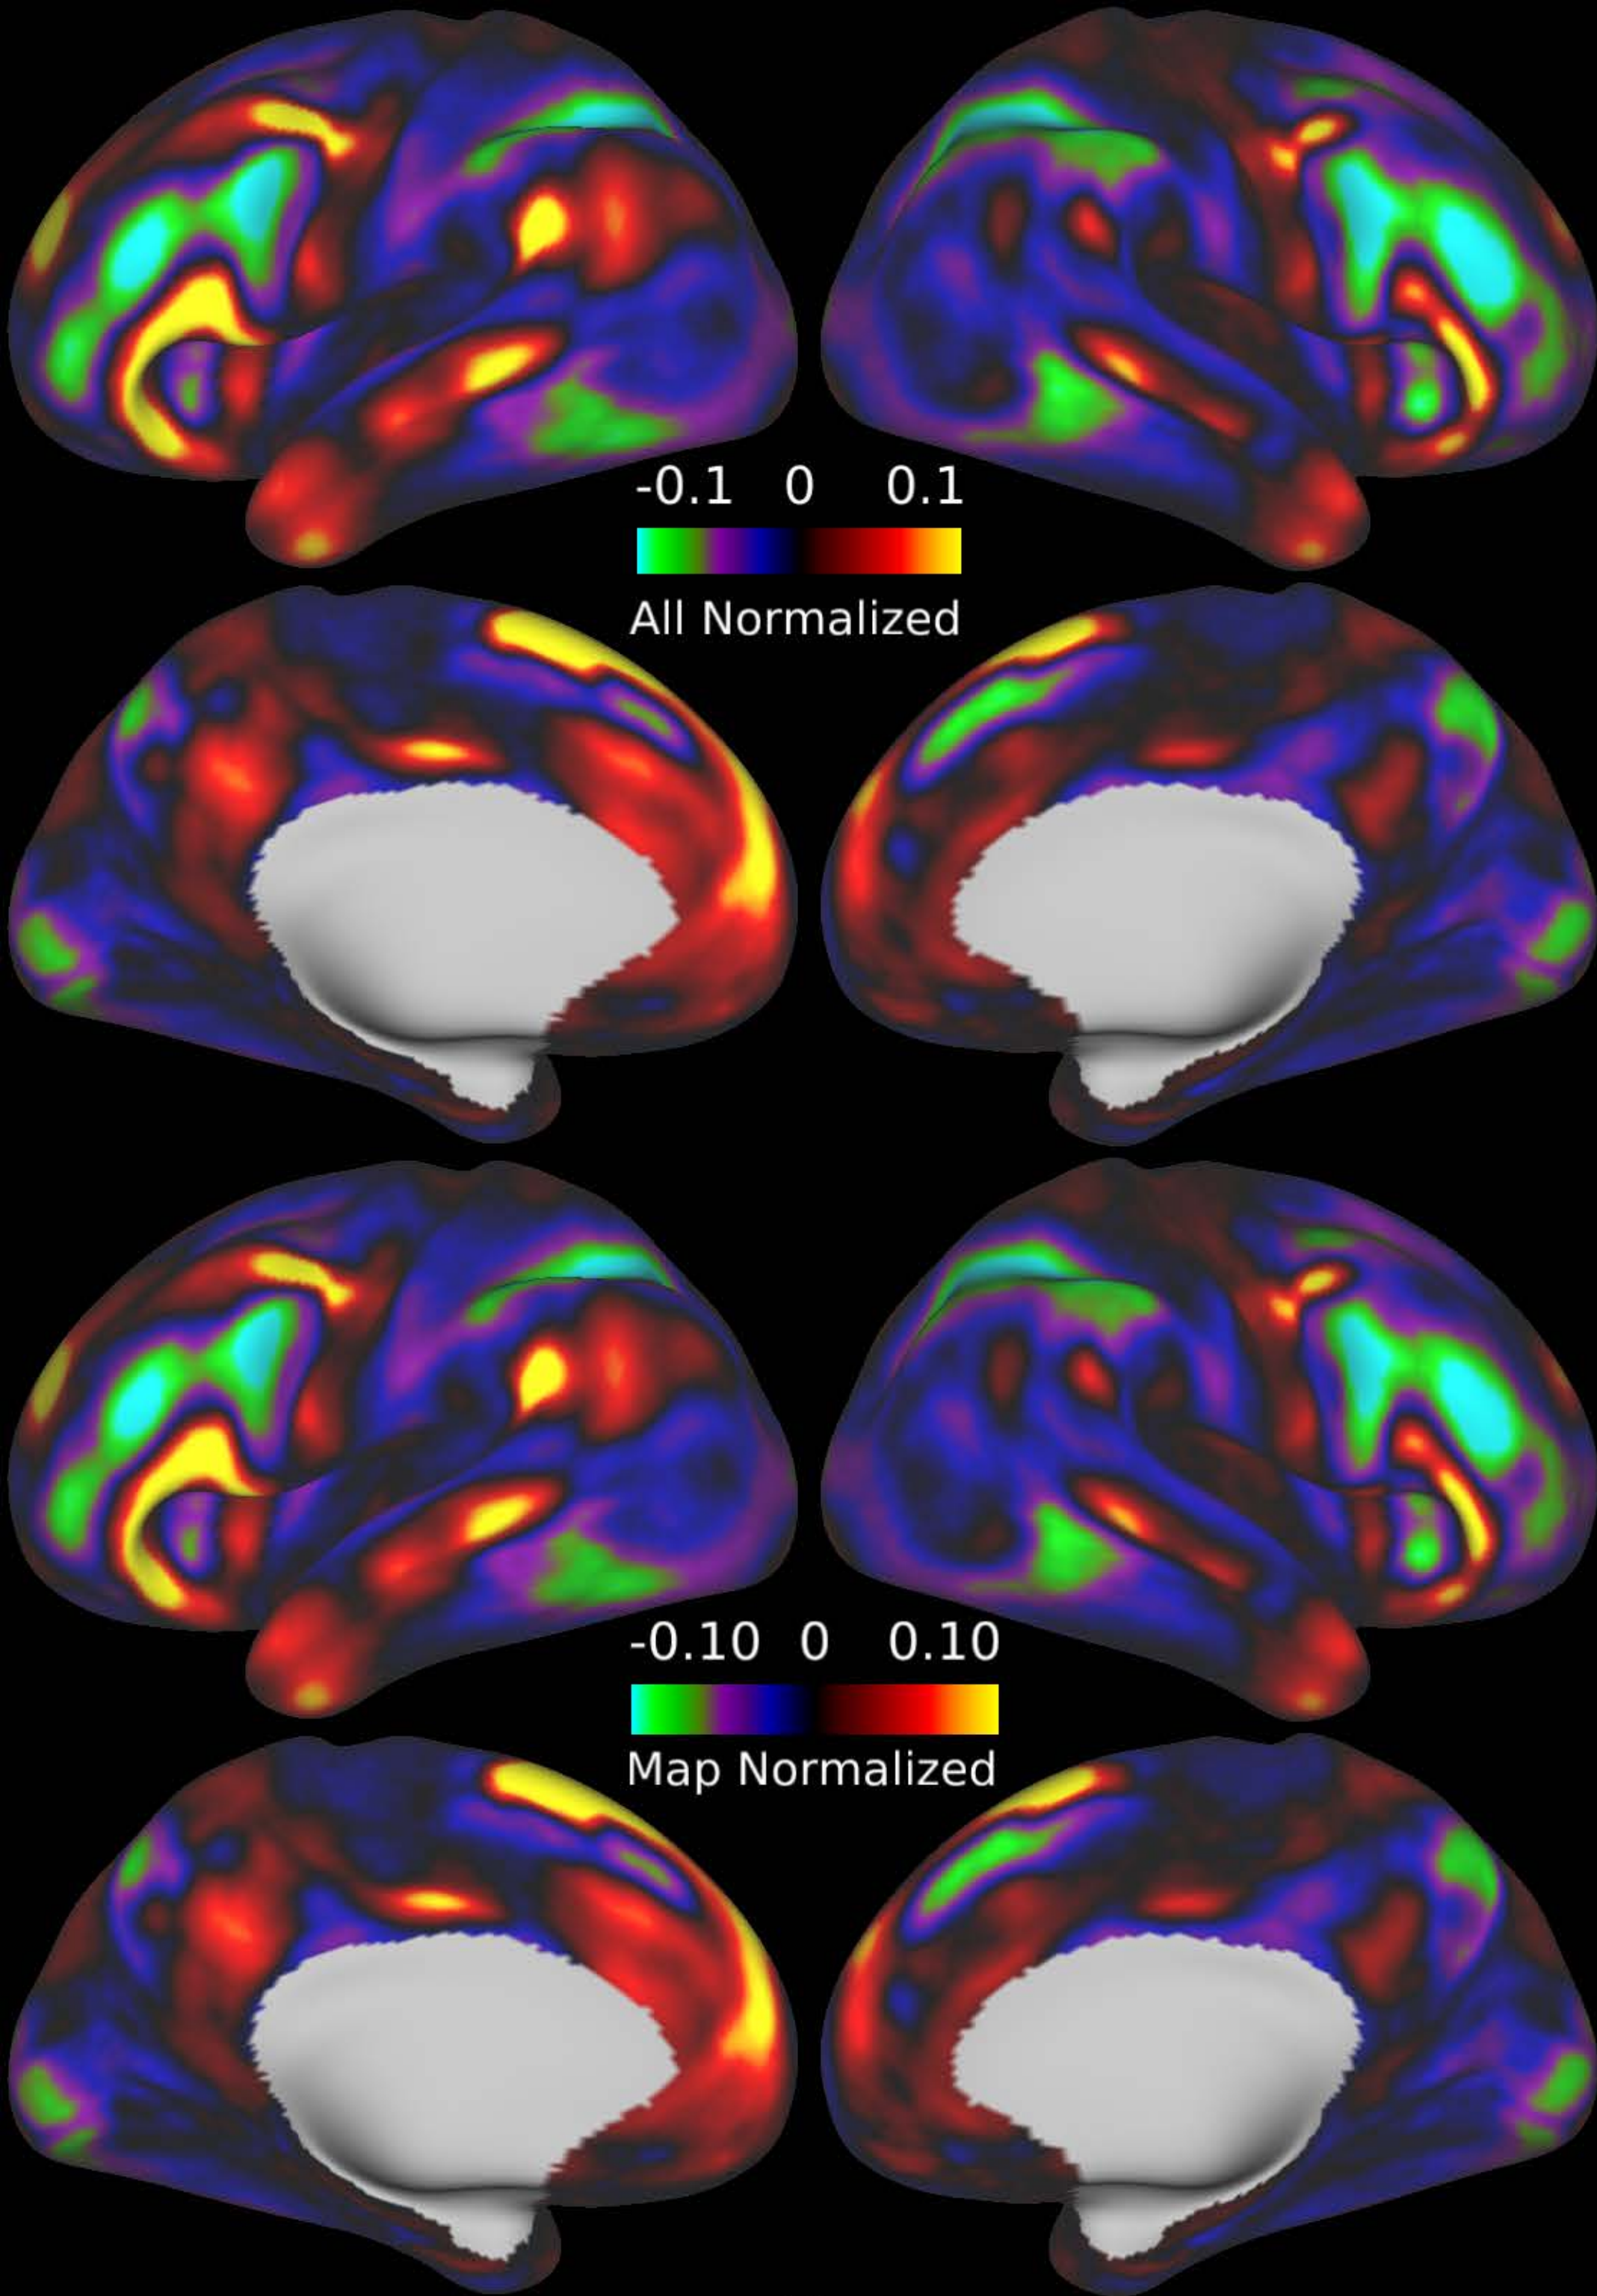

Hertz

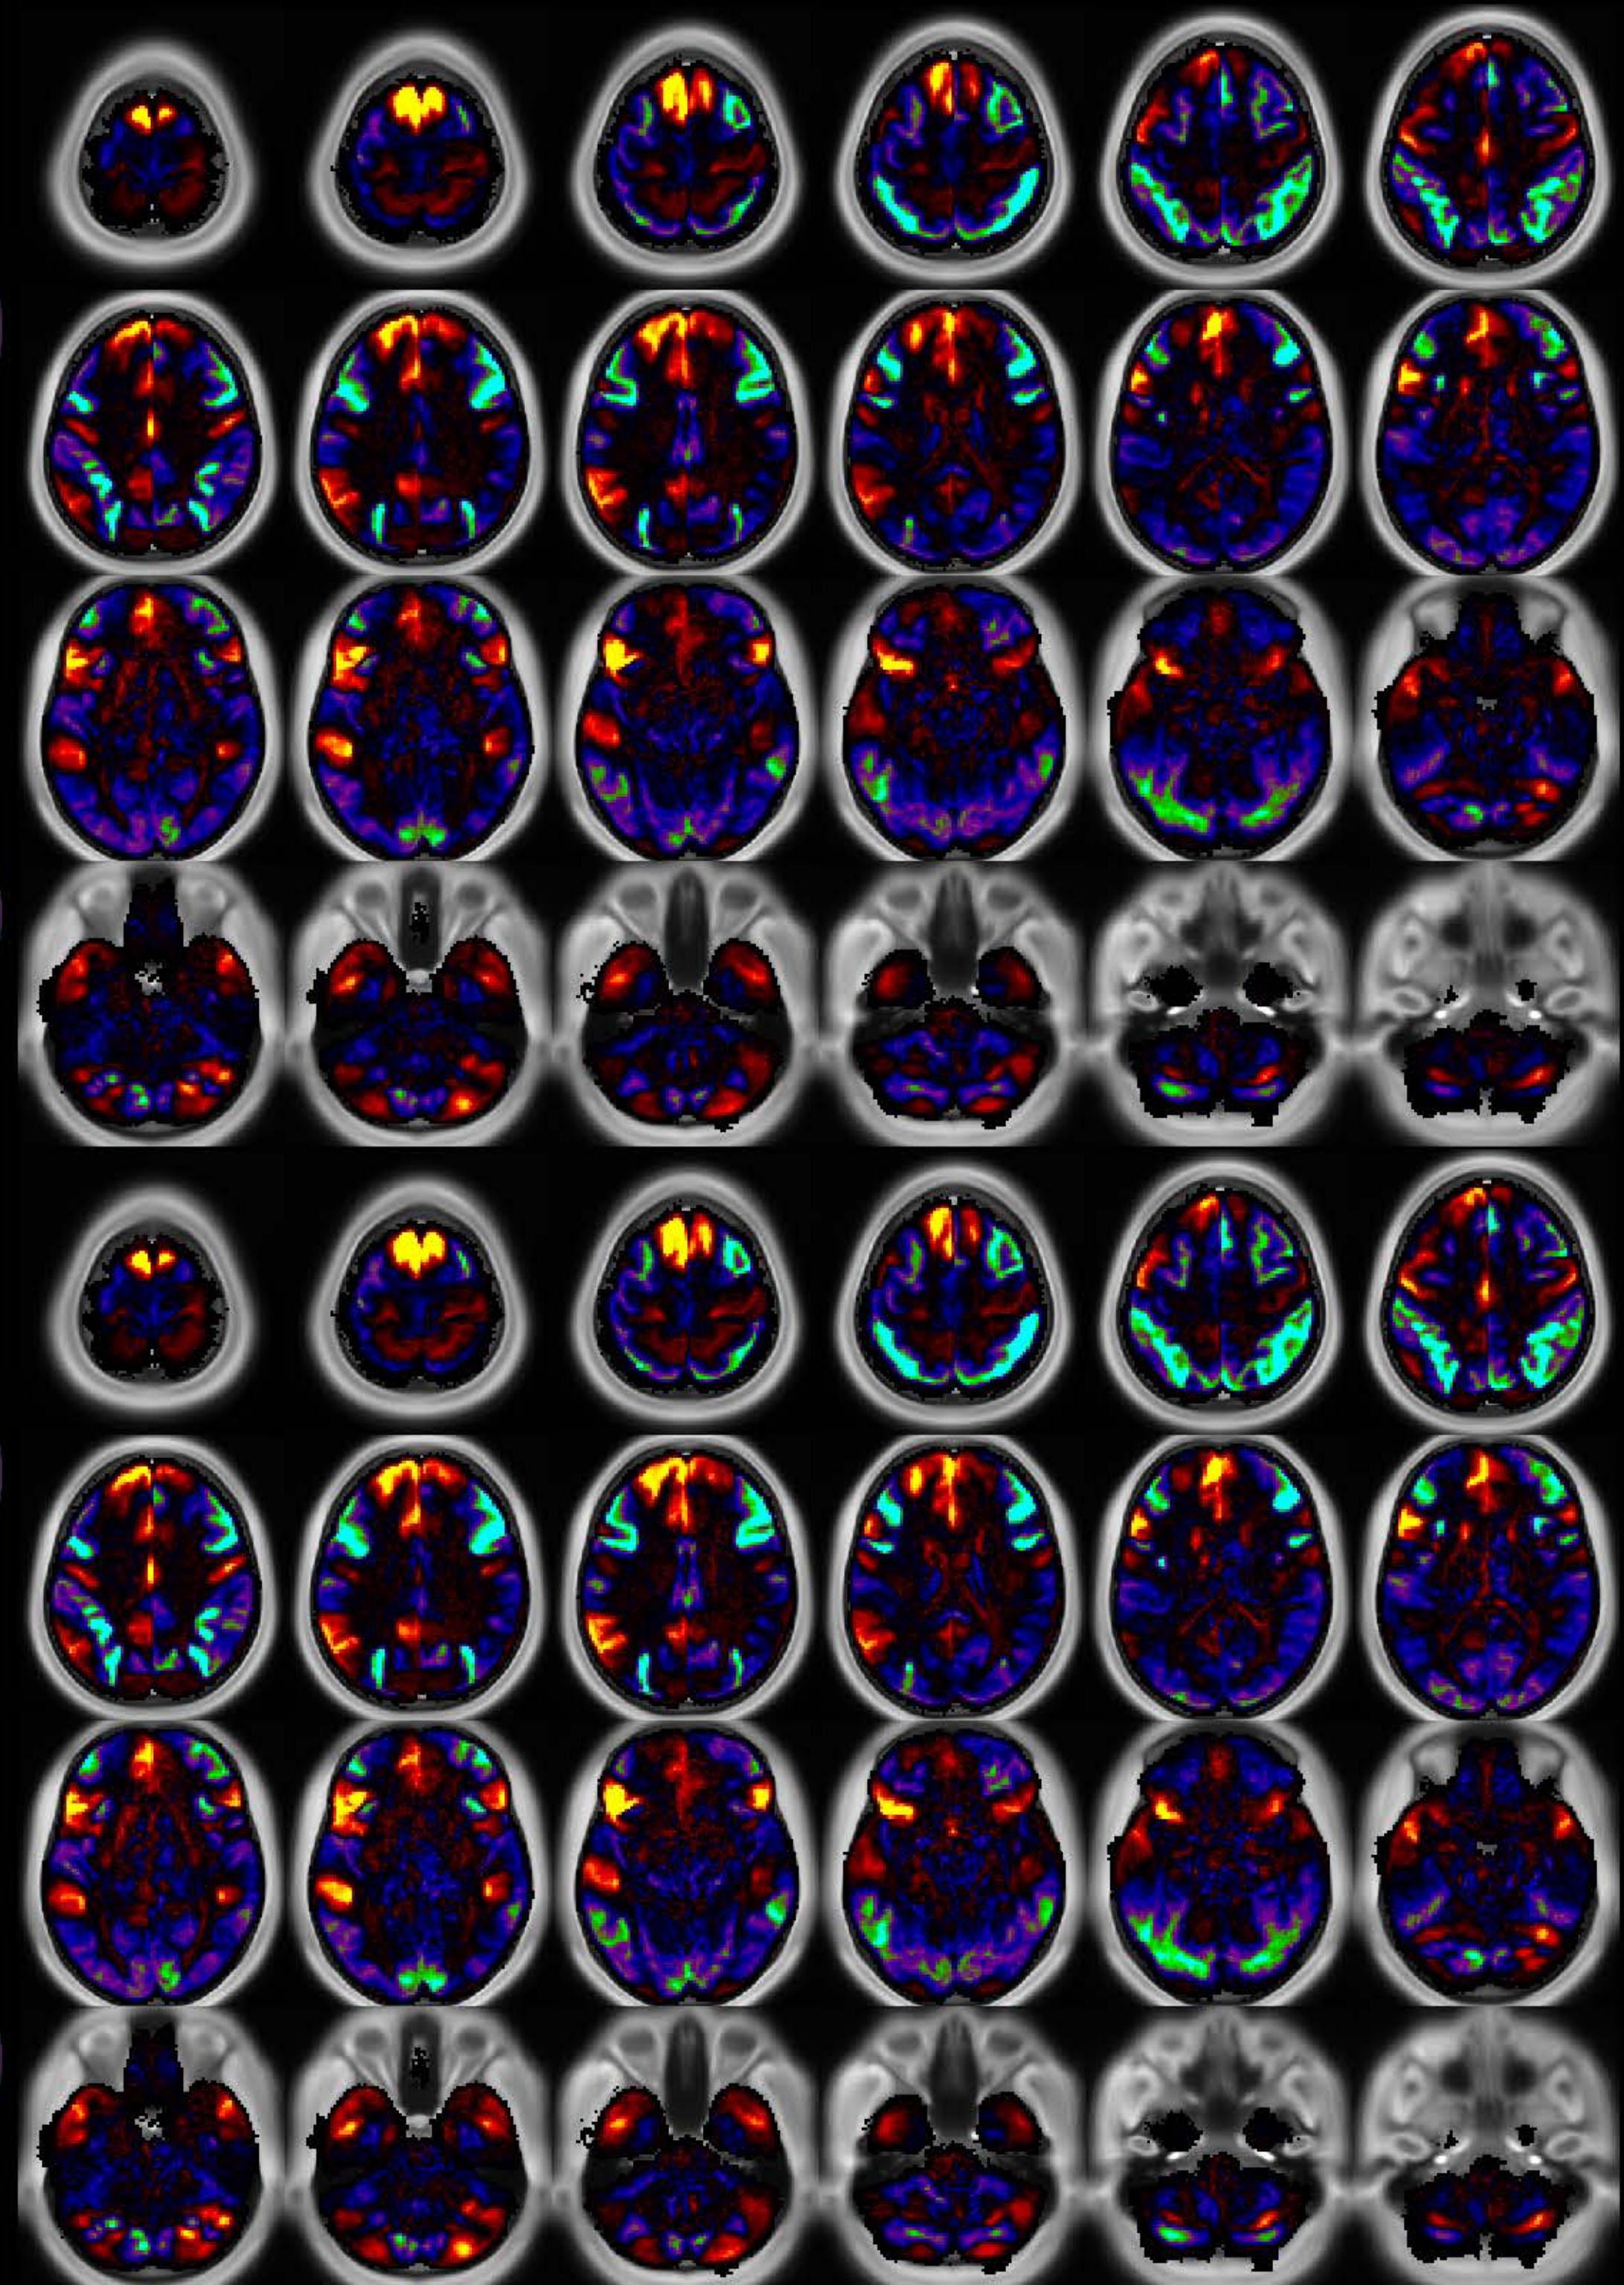

Seconds

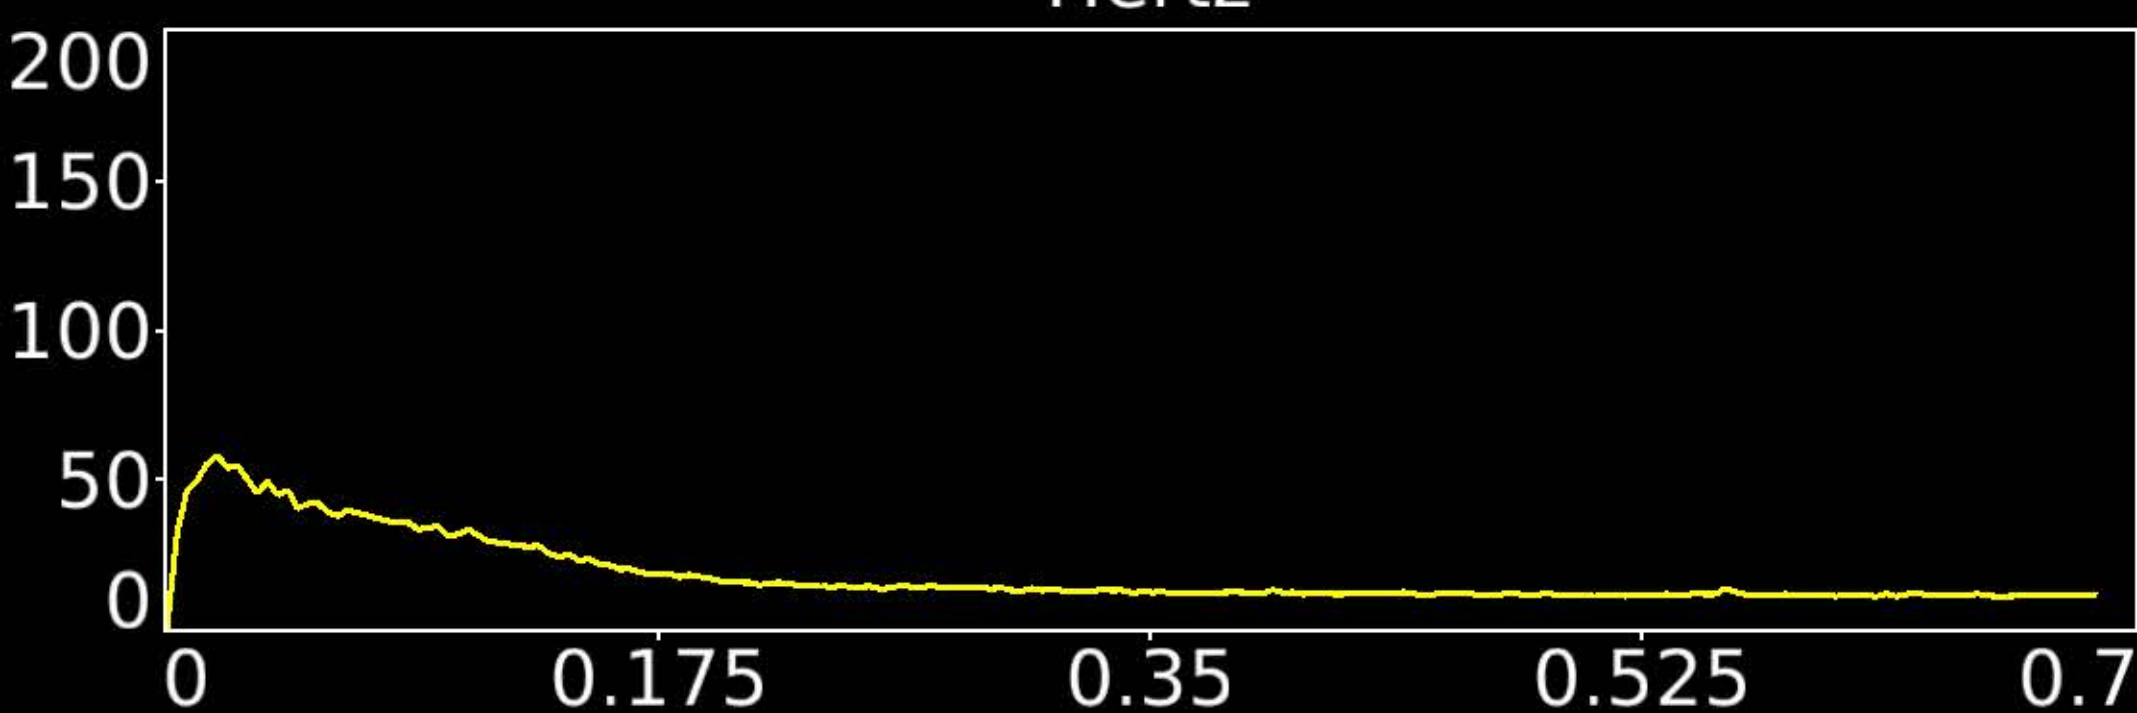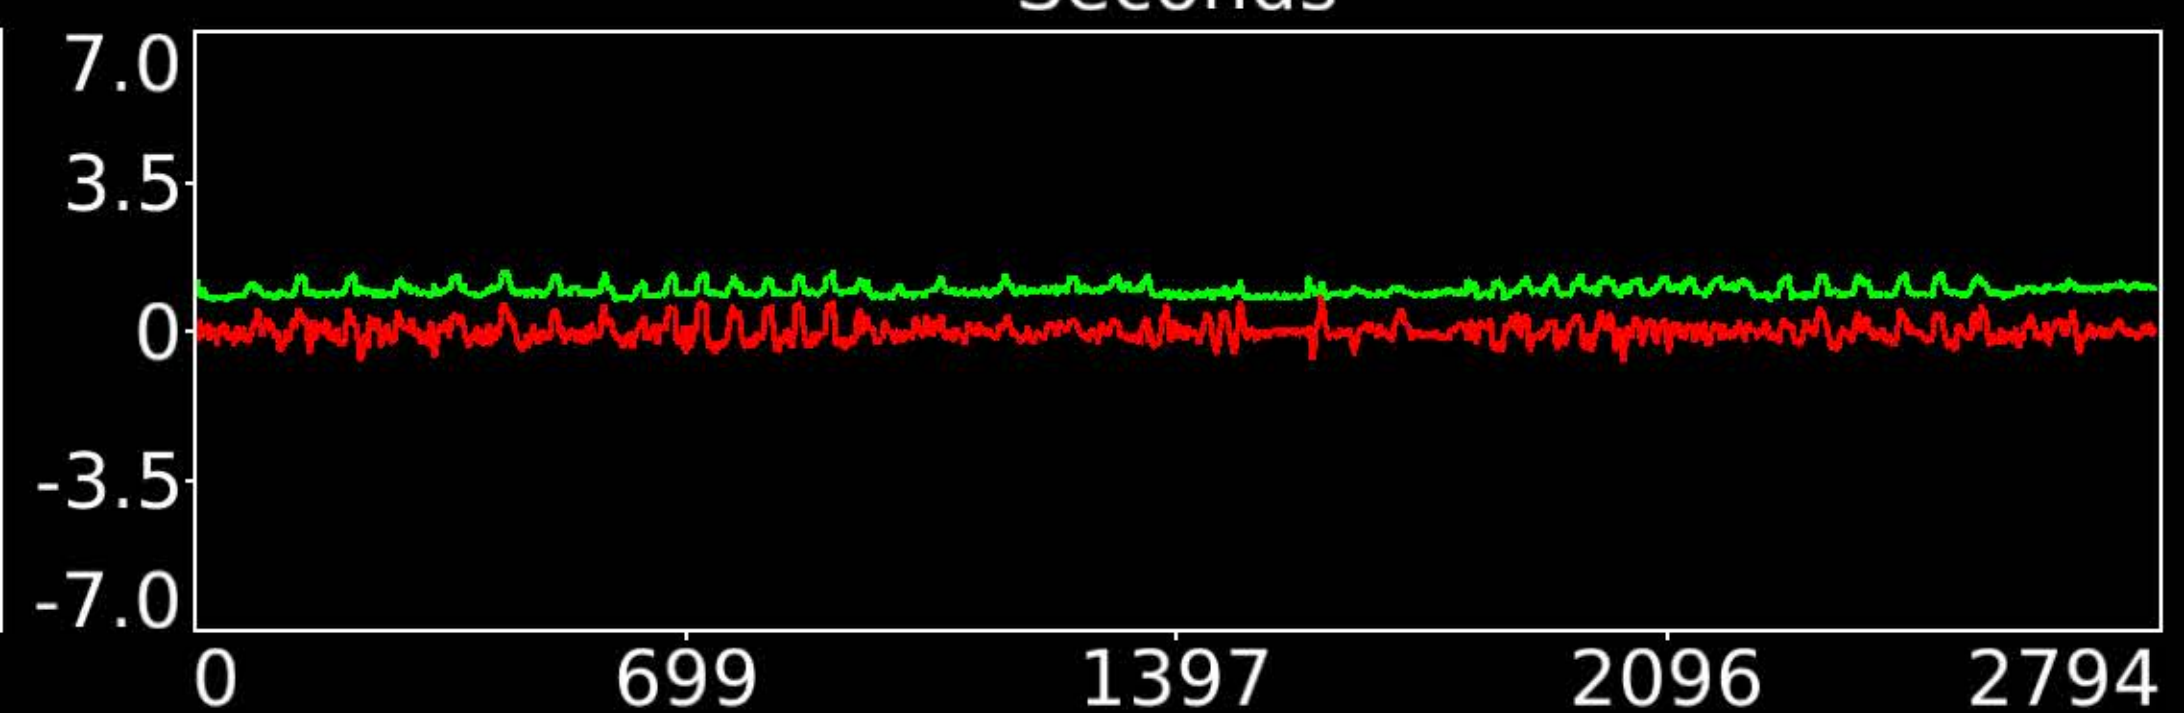

|                           |                           |                                         |  |
|---------------------------|---------------------------|-----------------------------------------|--|
| Number & Class: 22 Signal |                           | Name: Left Lateralized Language Network |  |
| RVT Correlated: No        | DVARS Dip Associated: No  | Cross-Subject Variable: No              |  |
| Single Subject: No        | % Variance Explained: 1.6 | Globality Index: 0.68                   |  |
| Rest Component: 20        | Taskr Component: 30       | Task Modulated: No                      |  |

Rationale: Spatial map includes positive and negative patches that respect known RSNs (e.g. Language Network) and areal boundaries (44; 45; 55b; PSL; SFL)



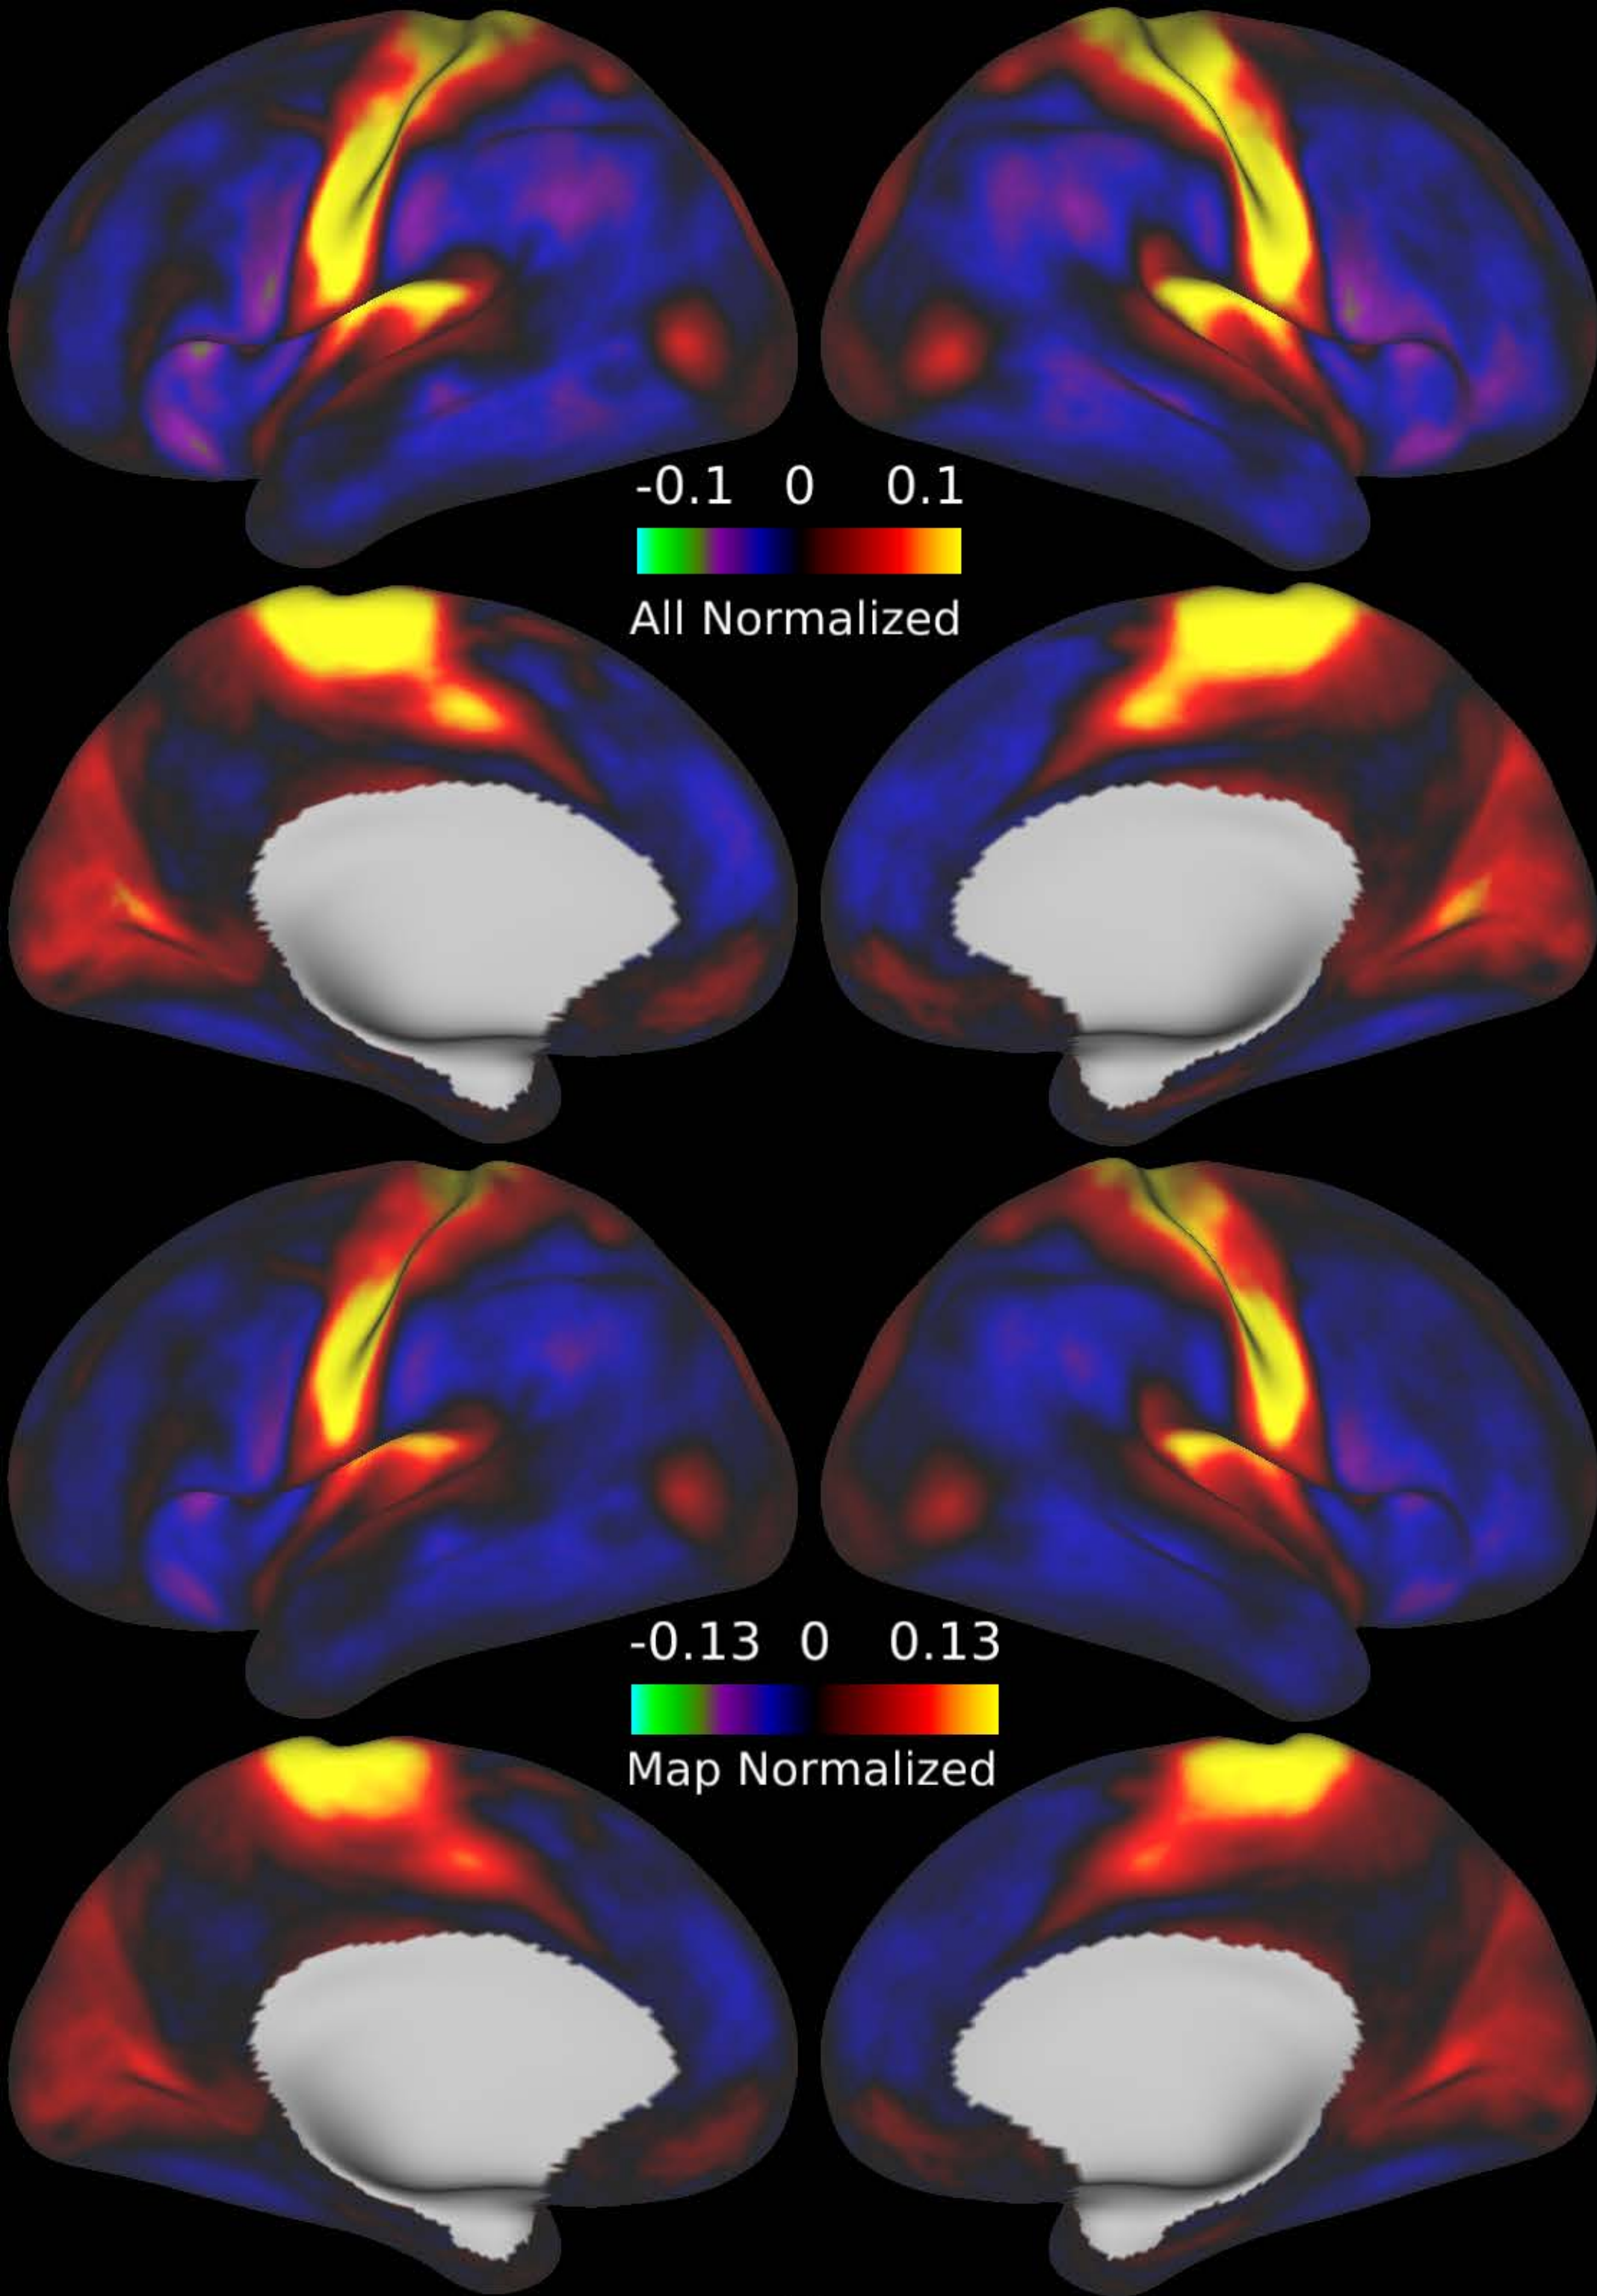

Hertz

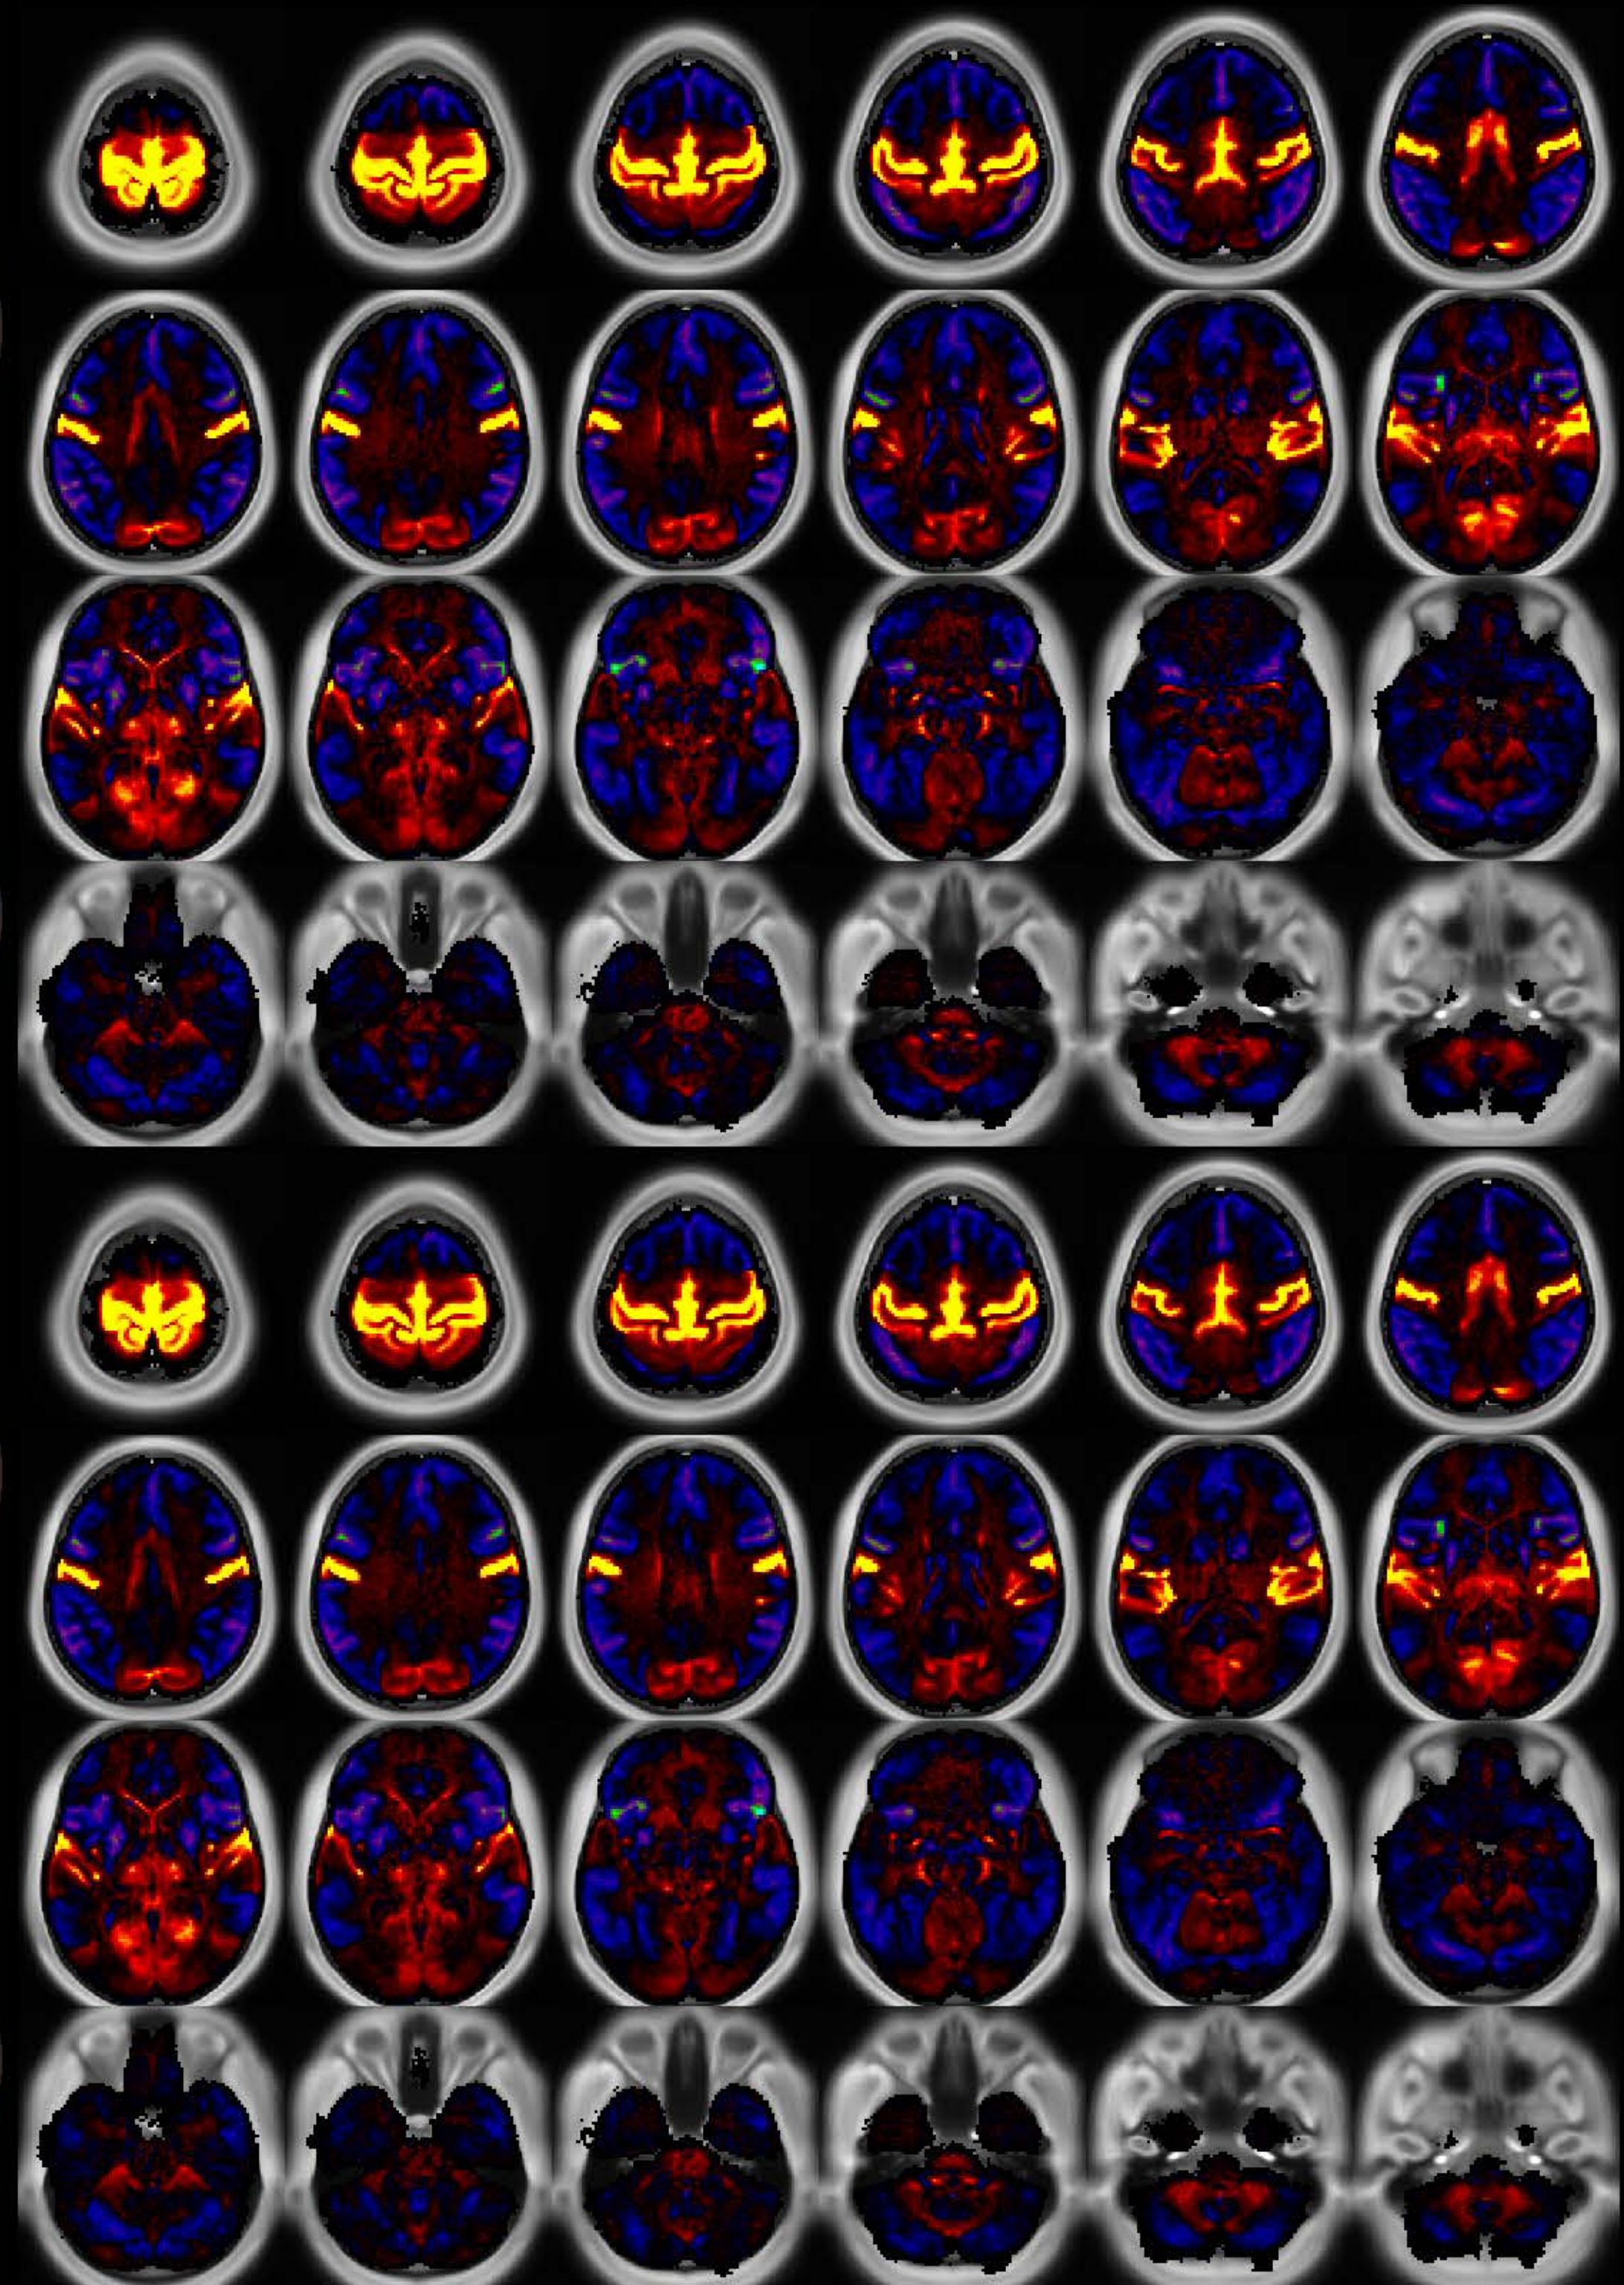

Seconds

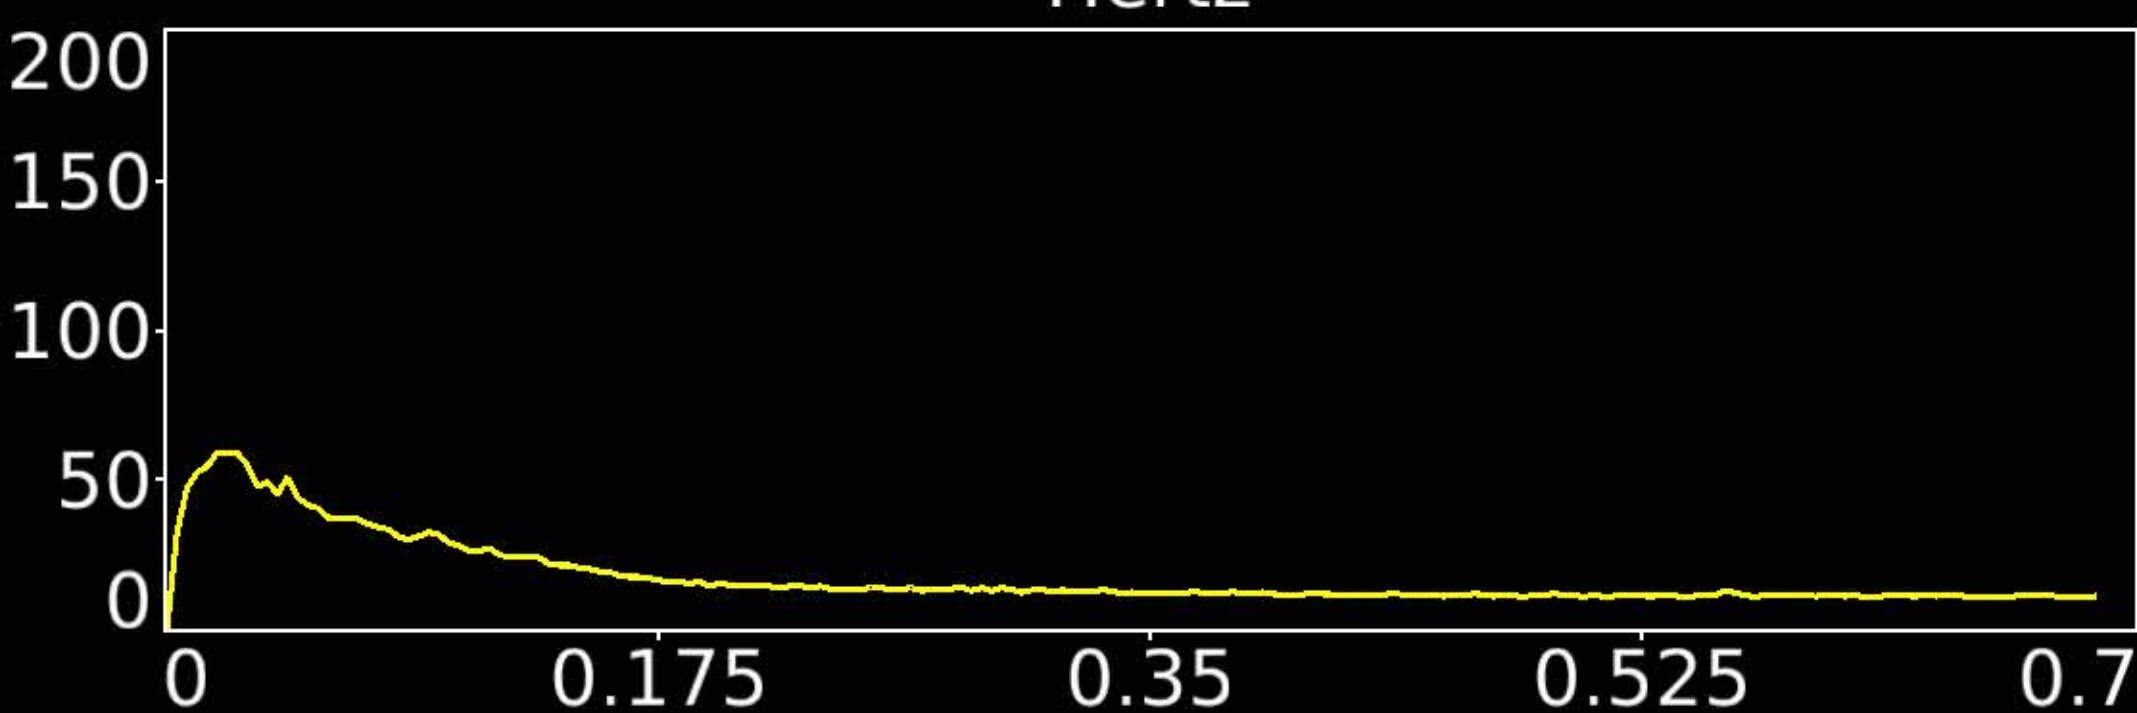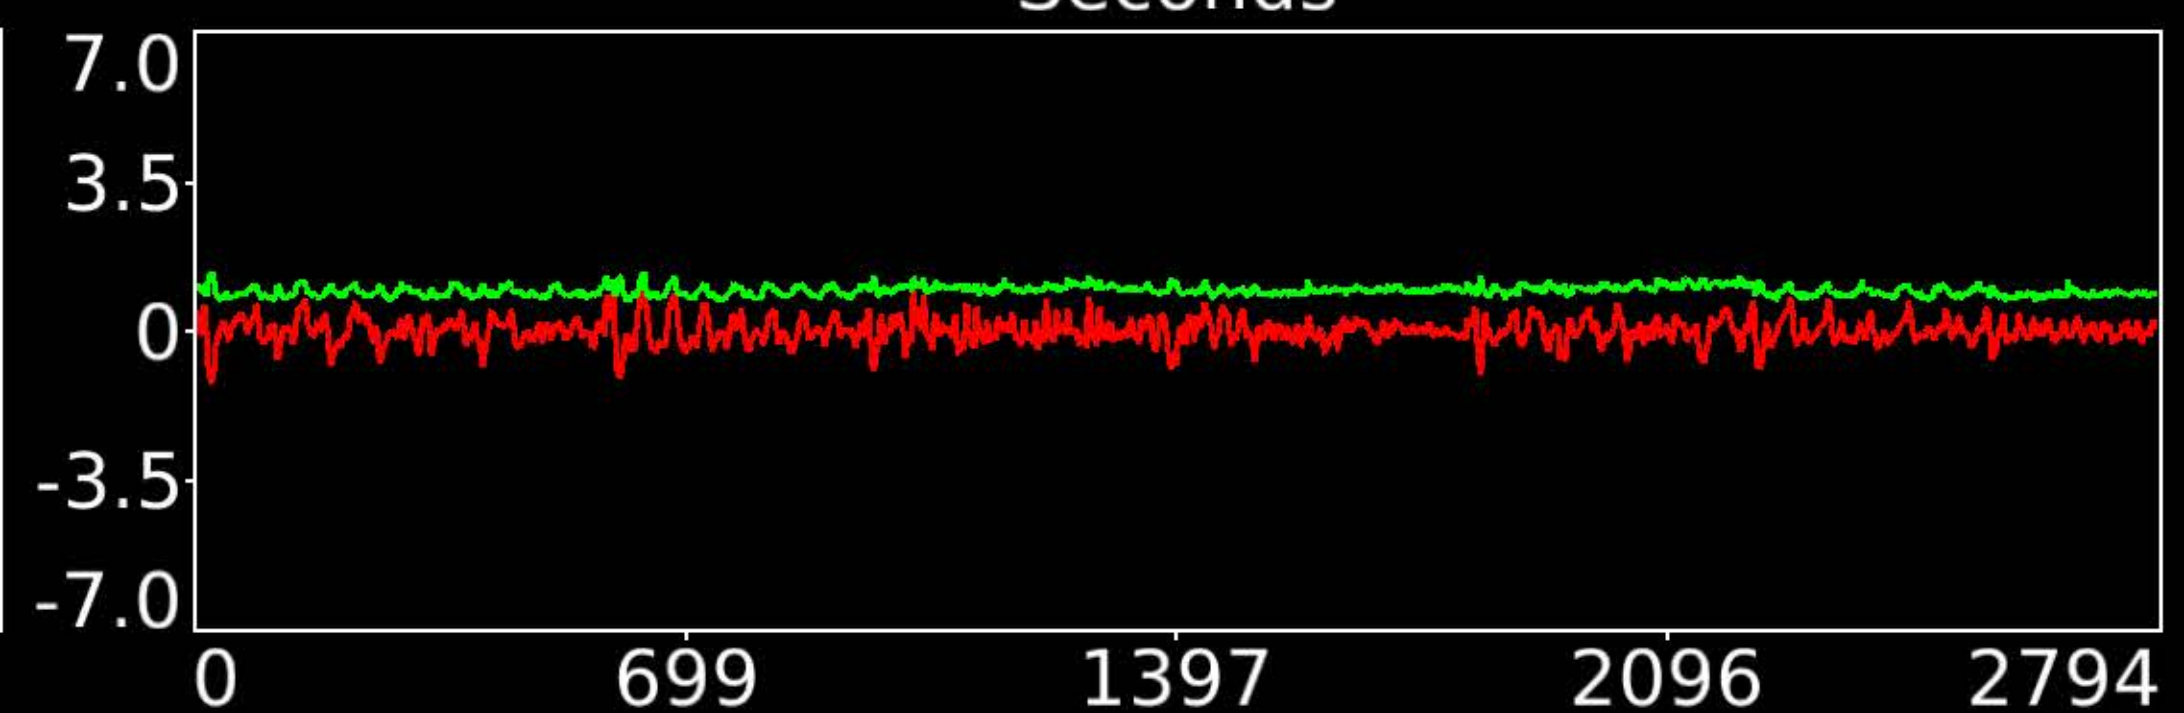

|                           |                            |                                      |  |
|---------------------------|----------------------------|--------------------------------------|--|
| Number & Class: 23 Signal |                            | Name: Early Sensori-Motor + Auditory |  |
| RVT Correlated: No        | DVARS Dip Associated: Yes  | Cross-Subject Variable: Yes          |  |
| Single Subject: No        | % Variance Explained: 1.57 | Globality Index: 0.02                |  |
| Rest Component: 5         | Taskr Component: No        | Task Modulated: No                   |  |

Rationale: Spatial map includes positive and negative patches that respect known areal boundaries (e.g. around MT+); most specific to sensori-motor cortex



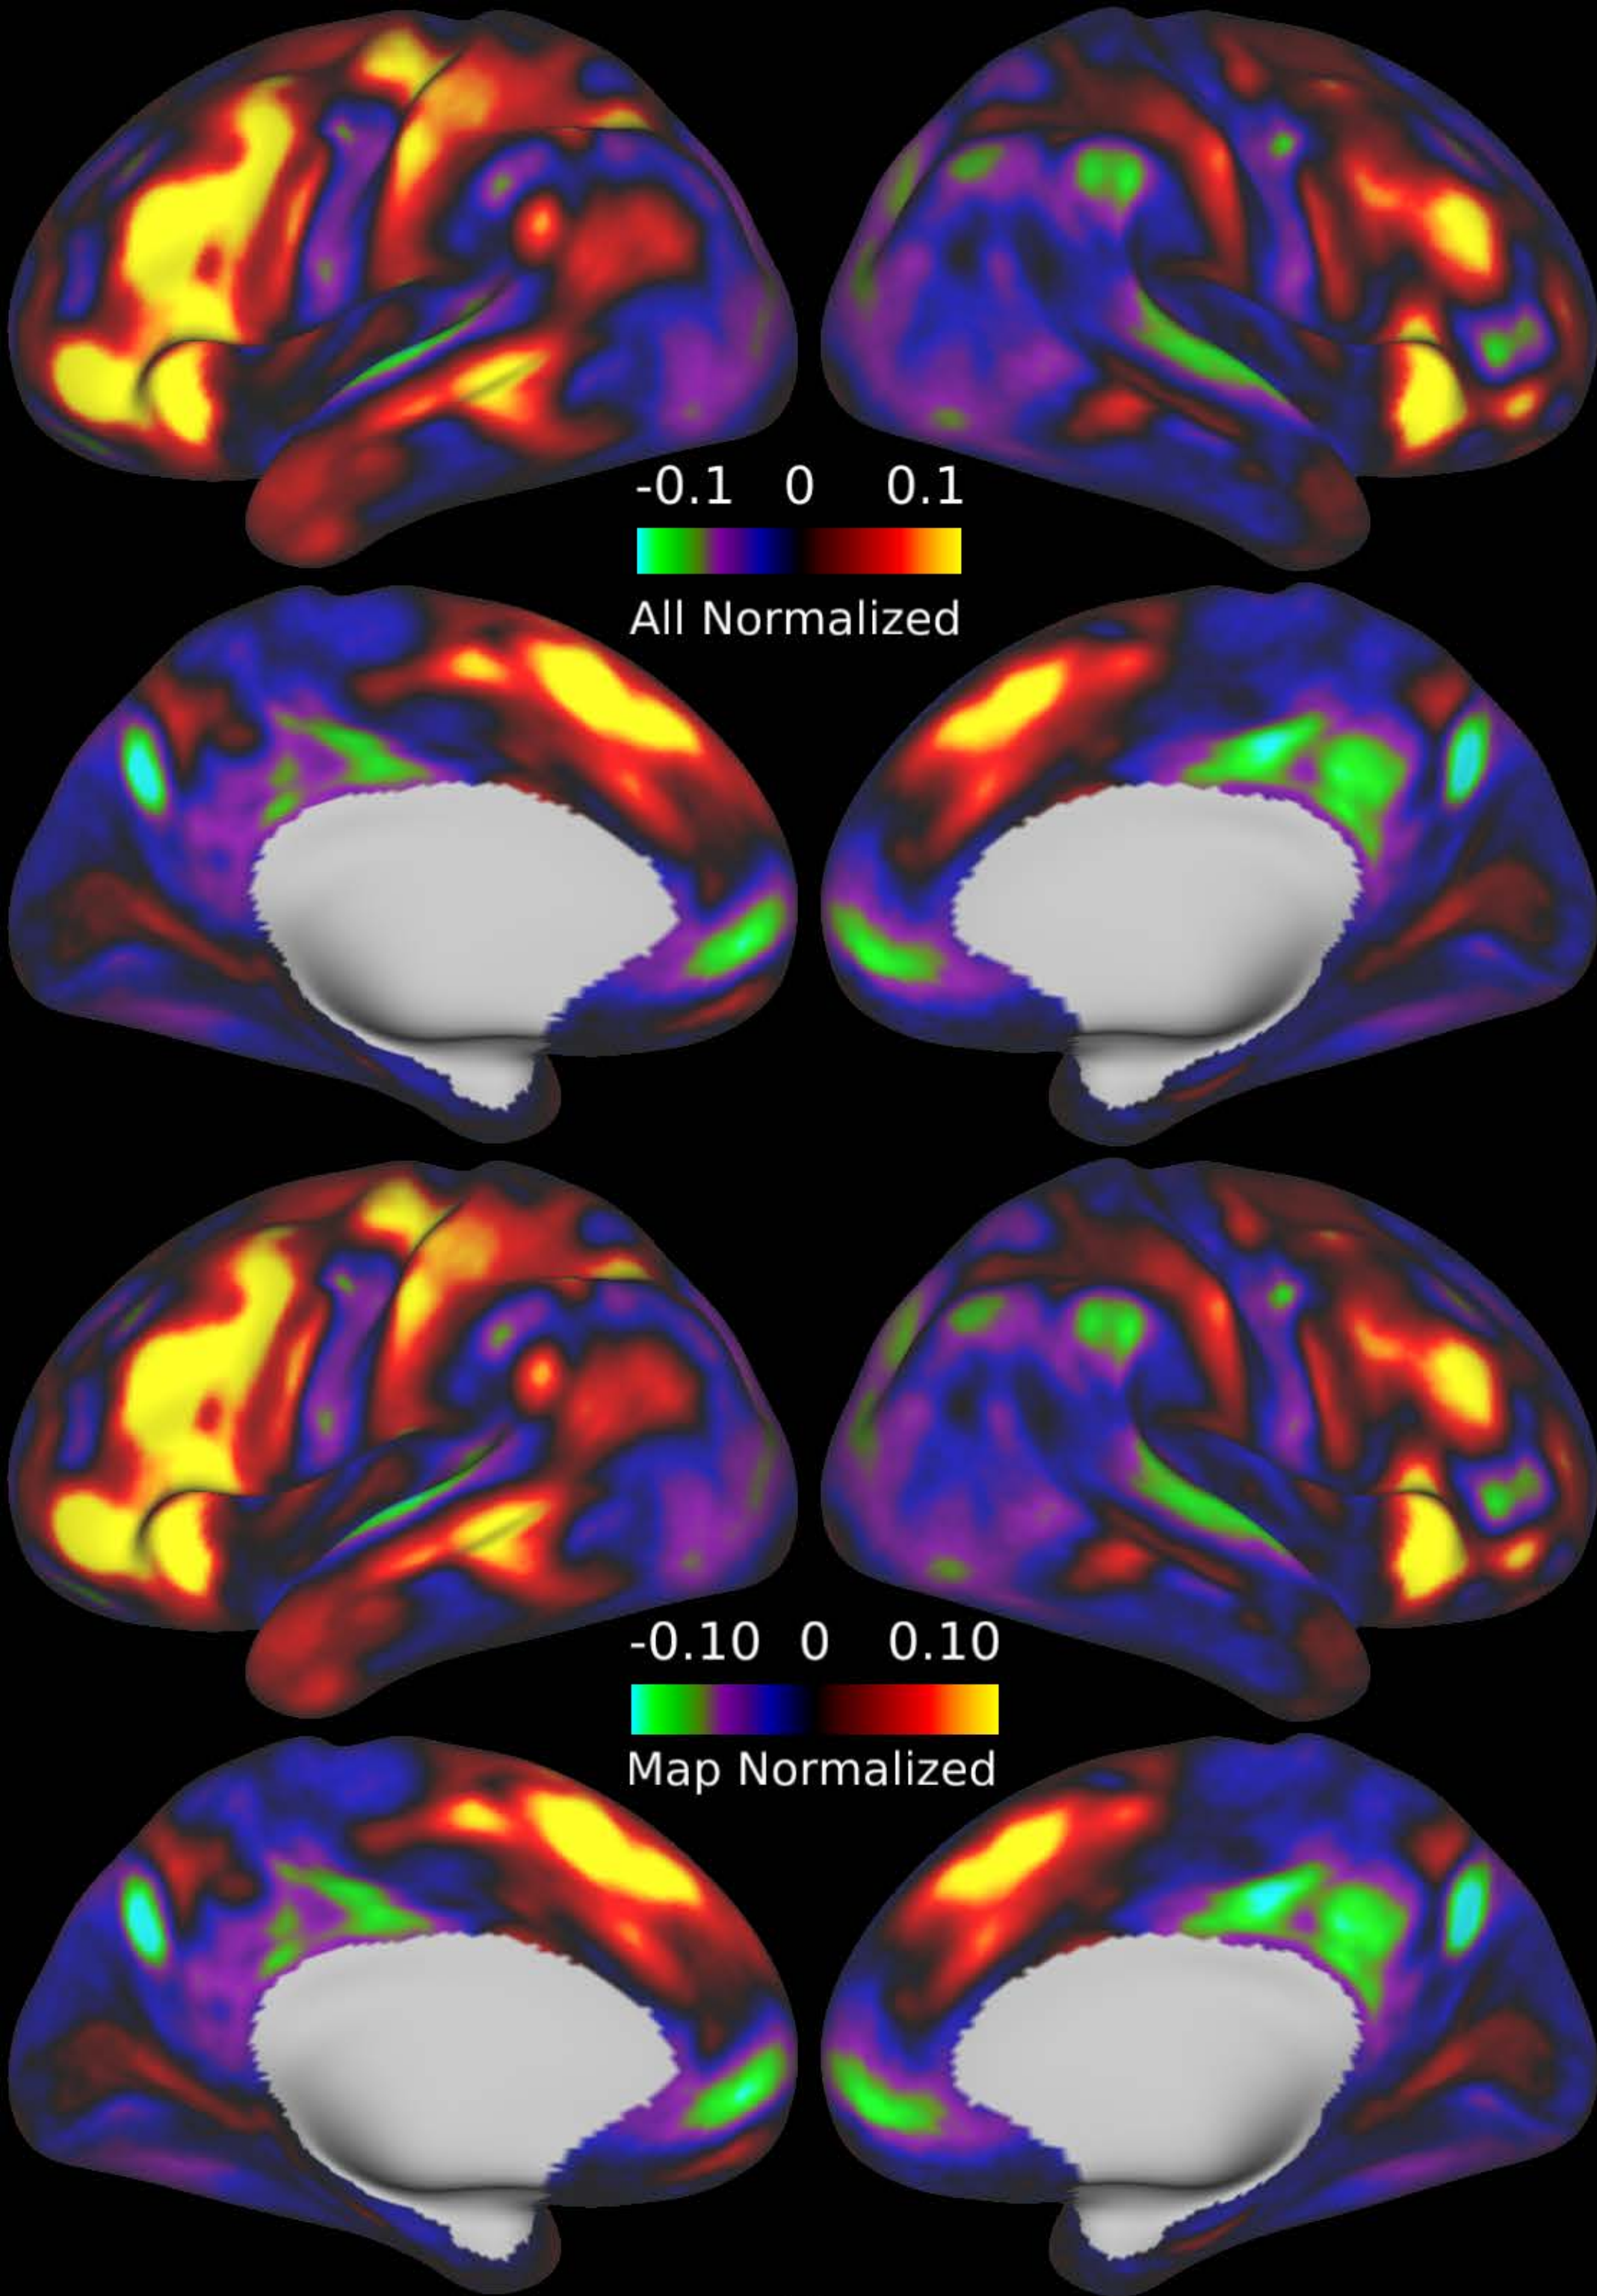

Hertz

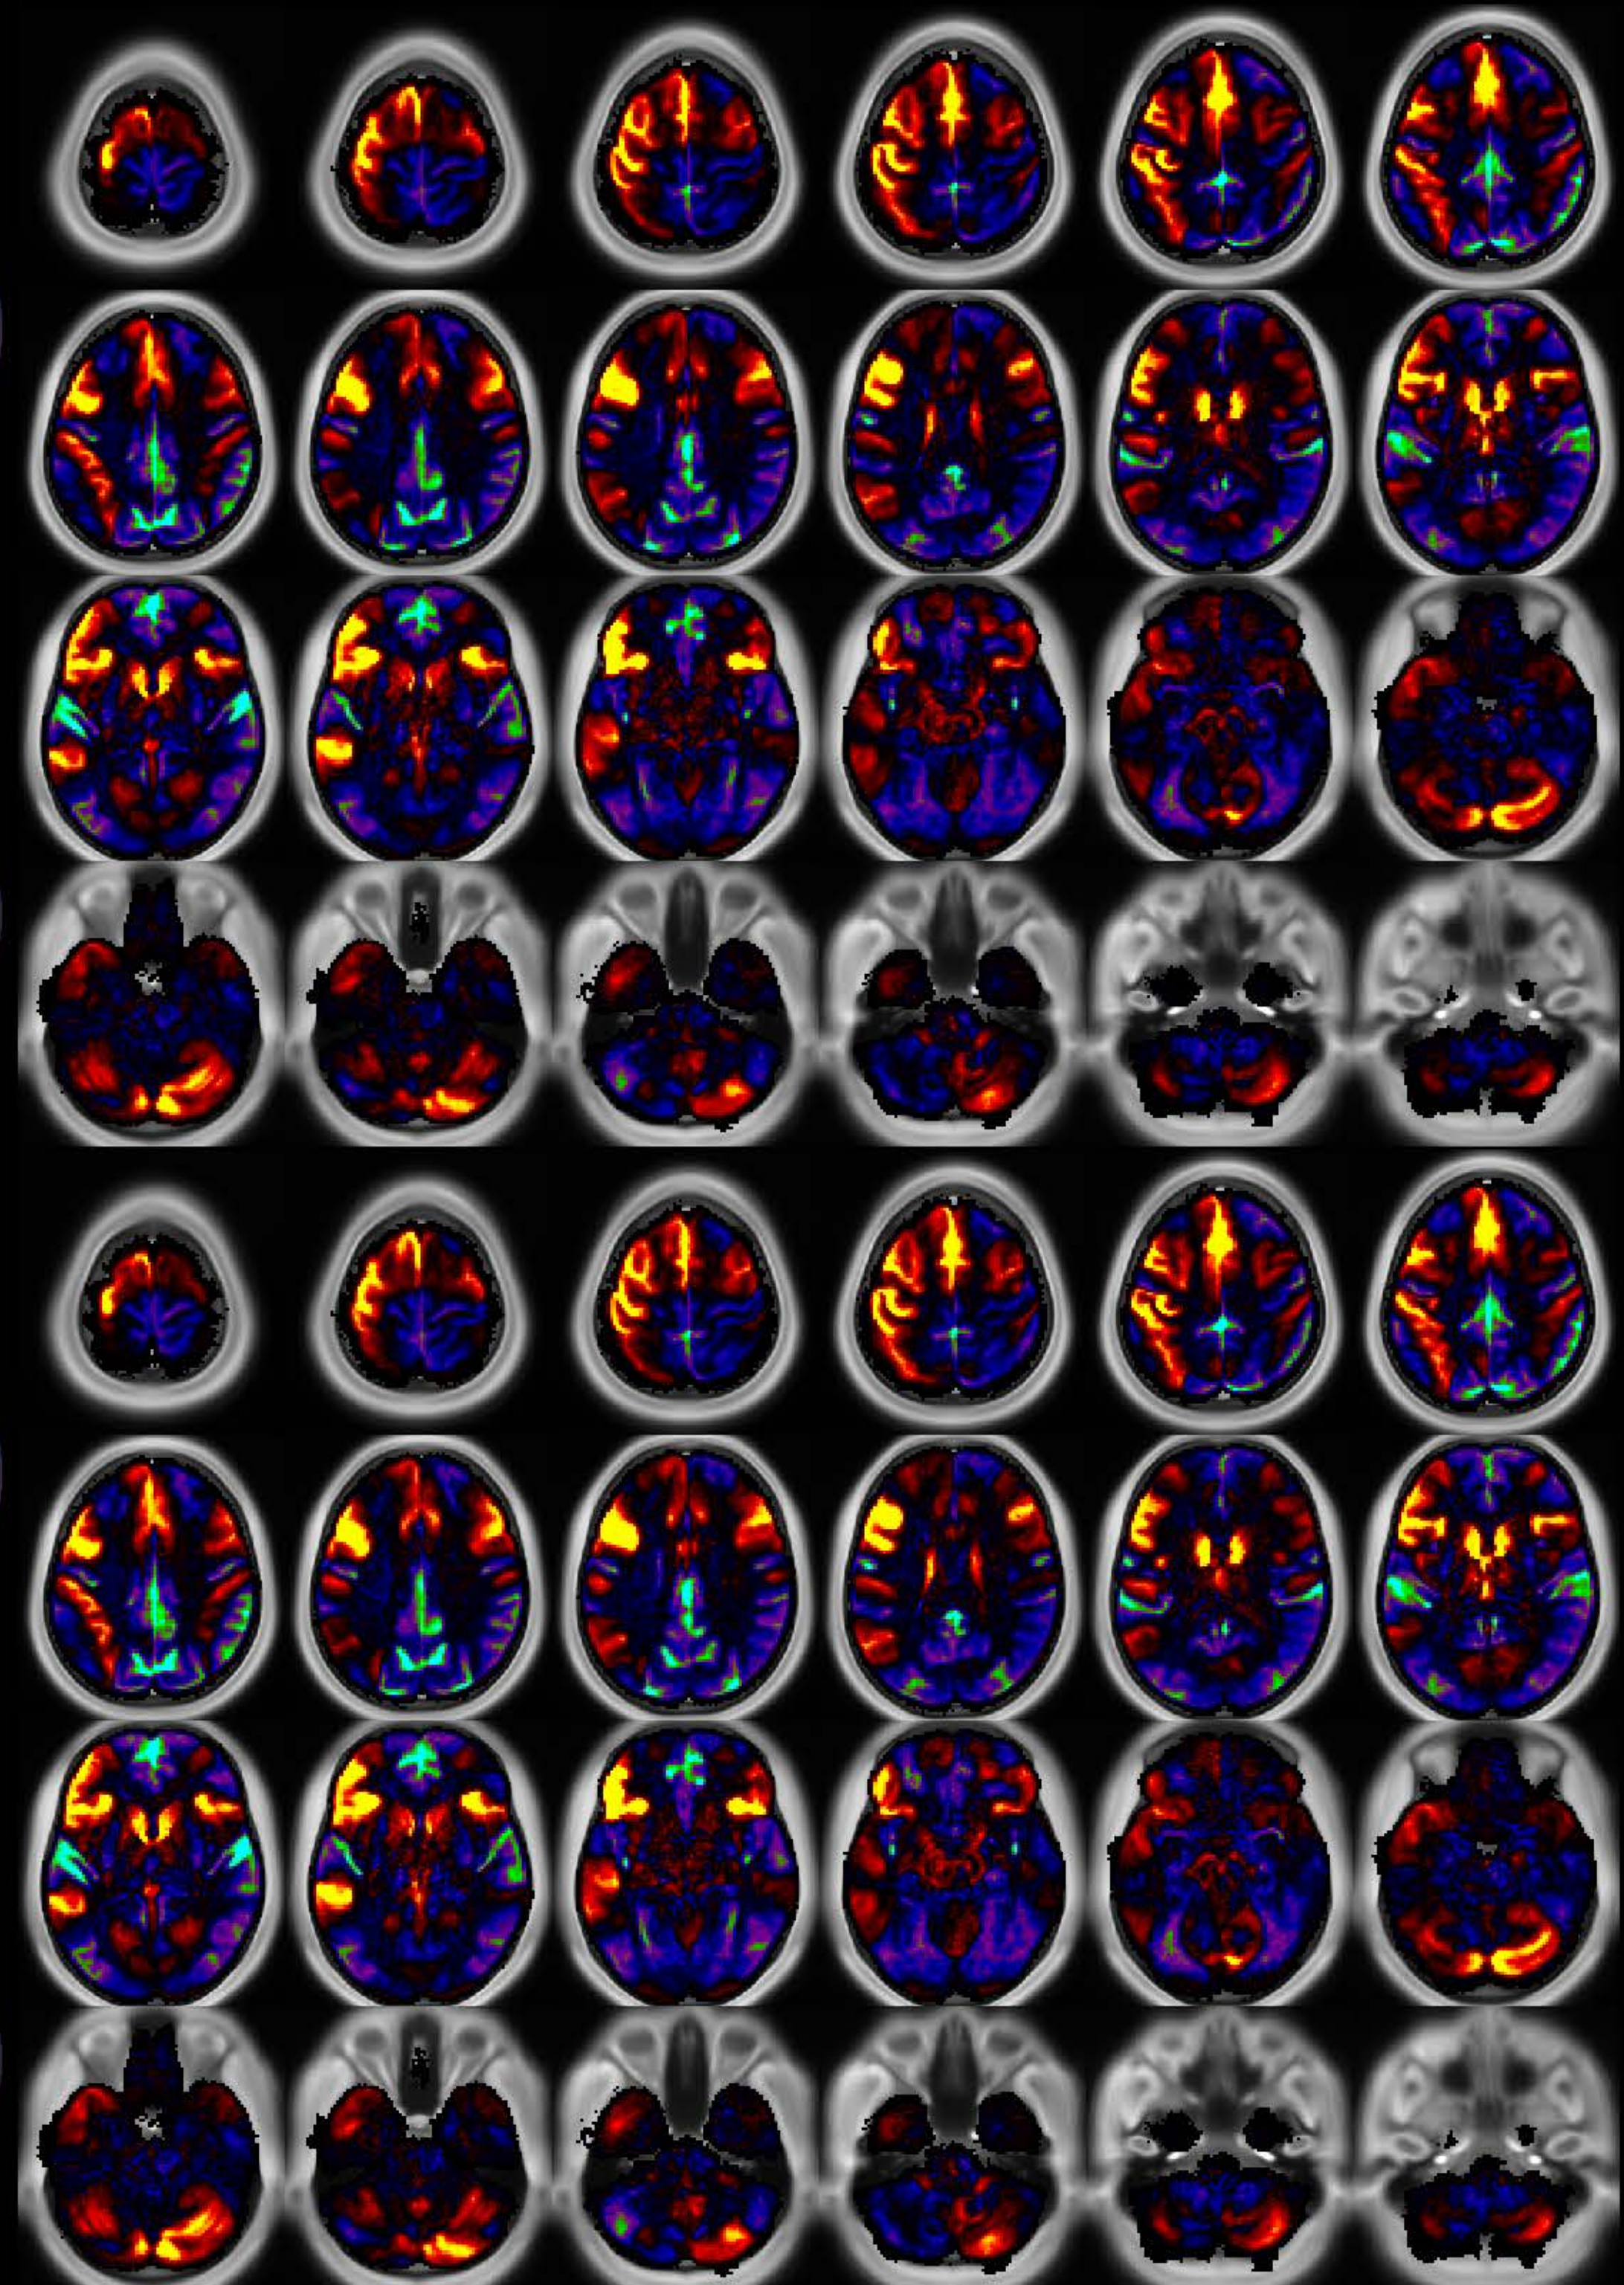

Seconds

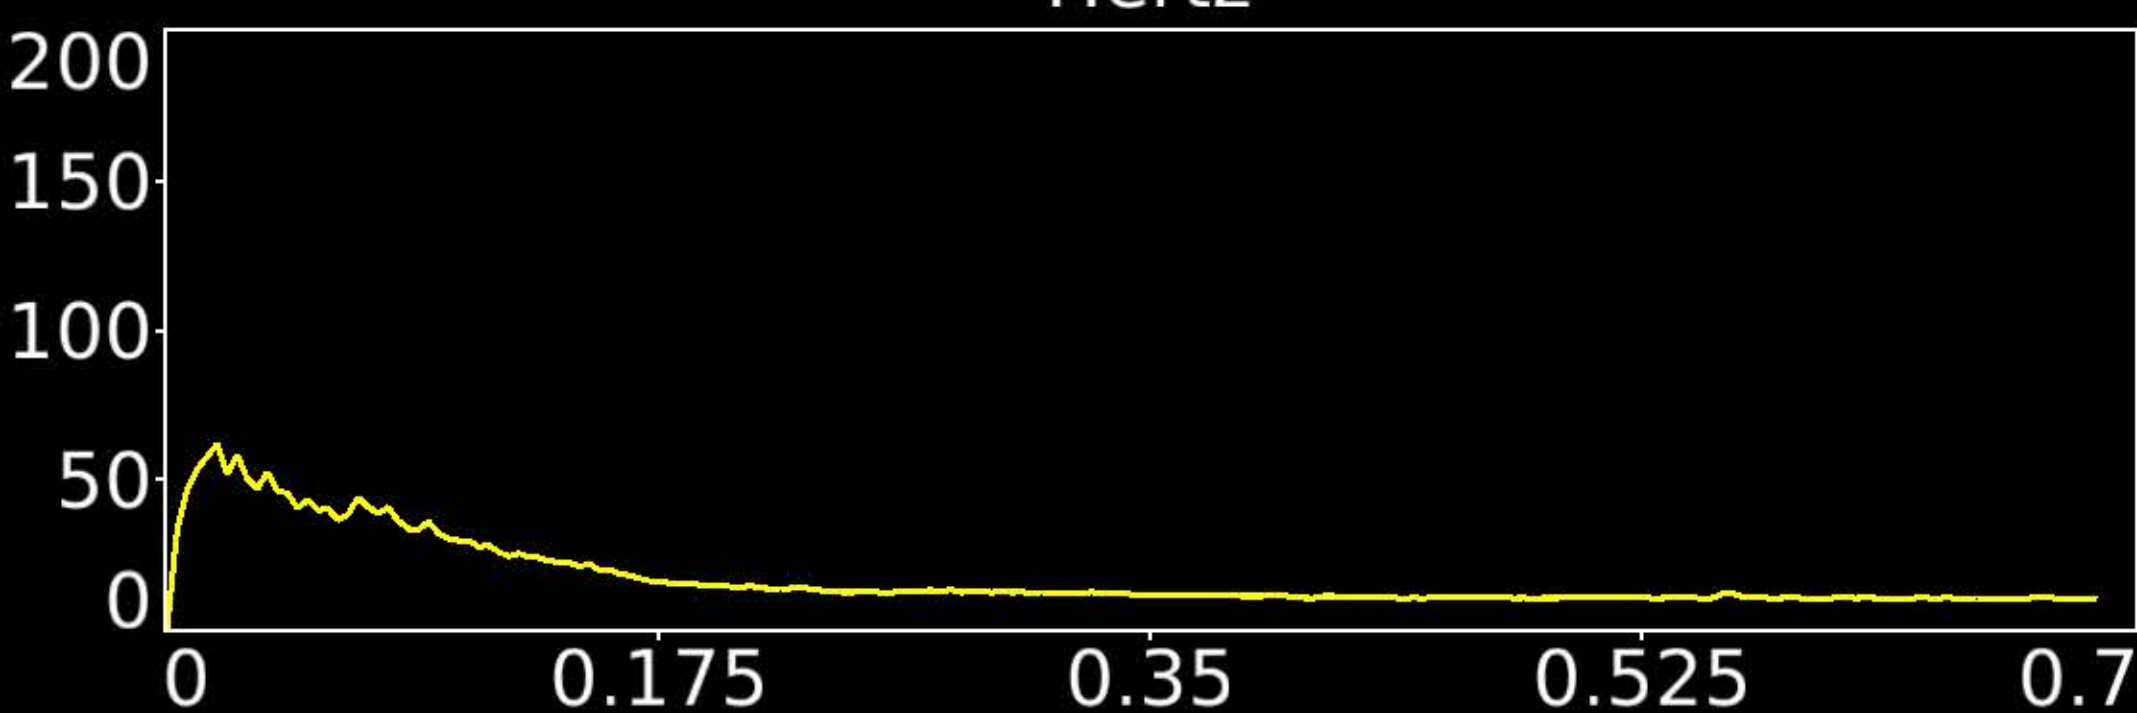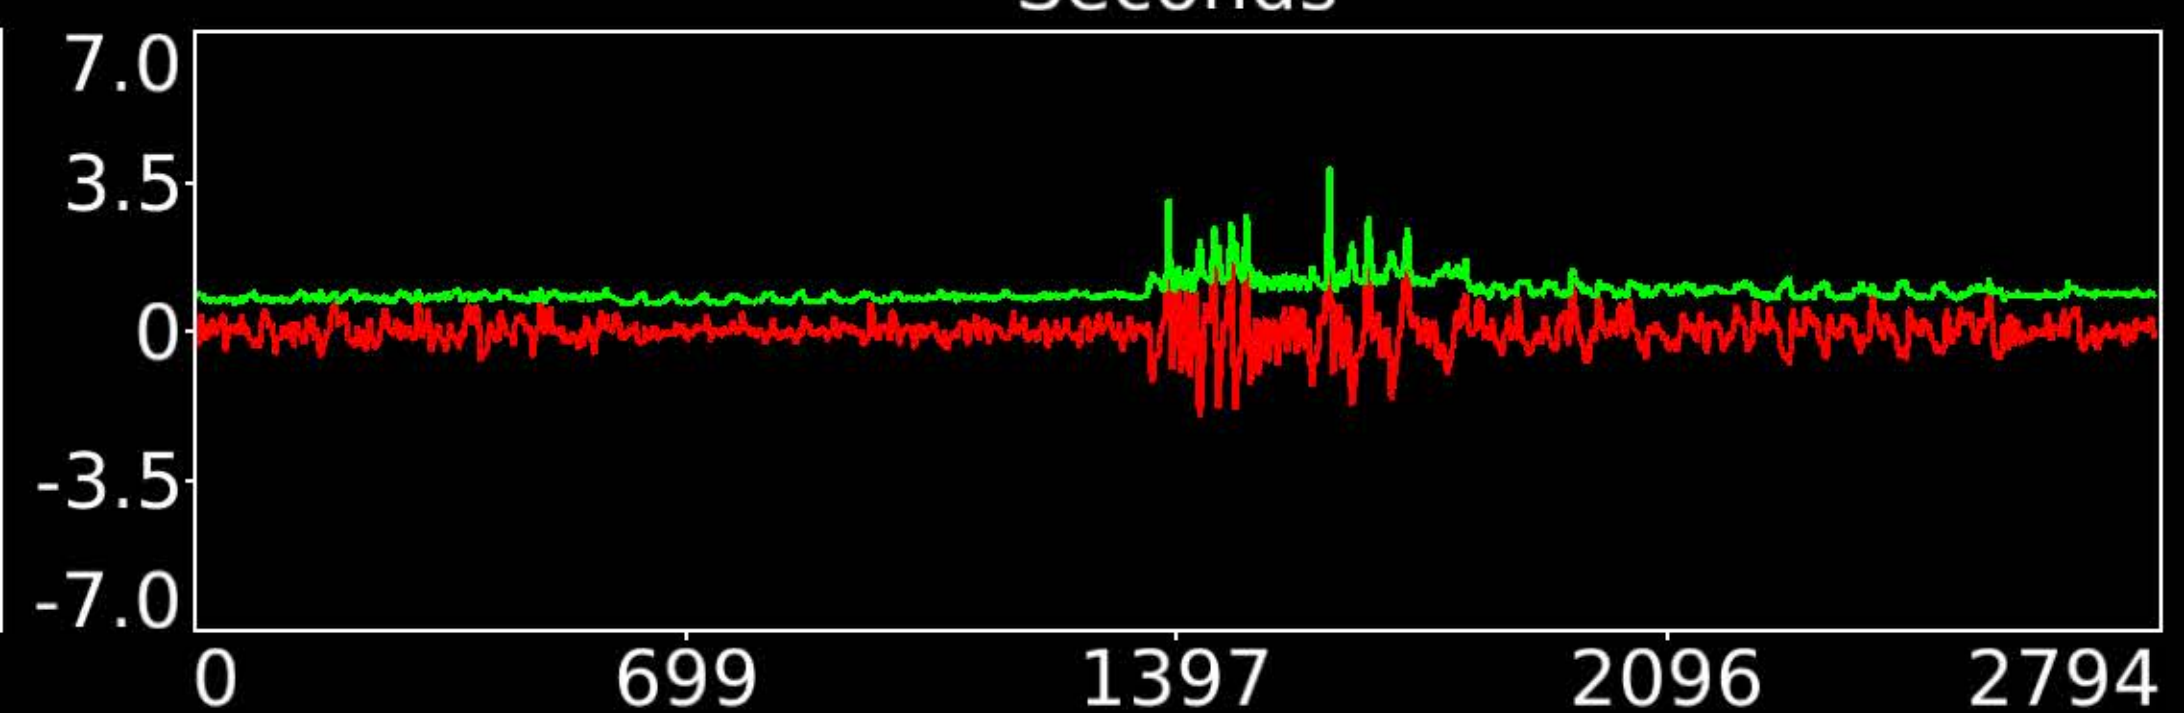

|                                                                                                               |                            |                            |  |
|---------------------------------------------------------------------------------------------------------------|----------------------------|----------------------------|--|
| Number & Class: 24 Signal                                                                                     |                            | Name: Language Task Math   |  |
| RVT Correlated: No                                                                                            | DVARS Dip Associated: No   | Cross-Subject Variable: No |  |
| Single Subject: No                                                                                            | % Variance Explained: 1.53 | Globality Index: 0.19      |  |
| Rest Component: No                                                                                            | Taskr Component: 17        | Task Modulated: Language   |  |
| Rationale: Spatial map includes positive and negative patches that are correlated with a specific task design |                            |                            |  |



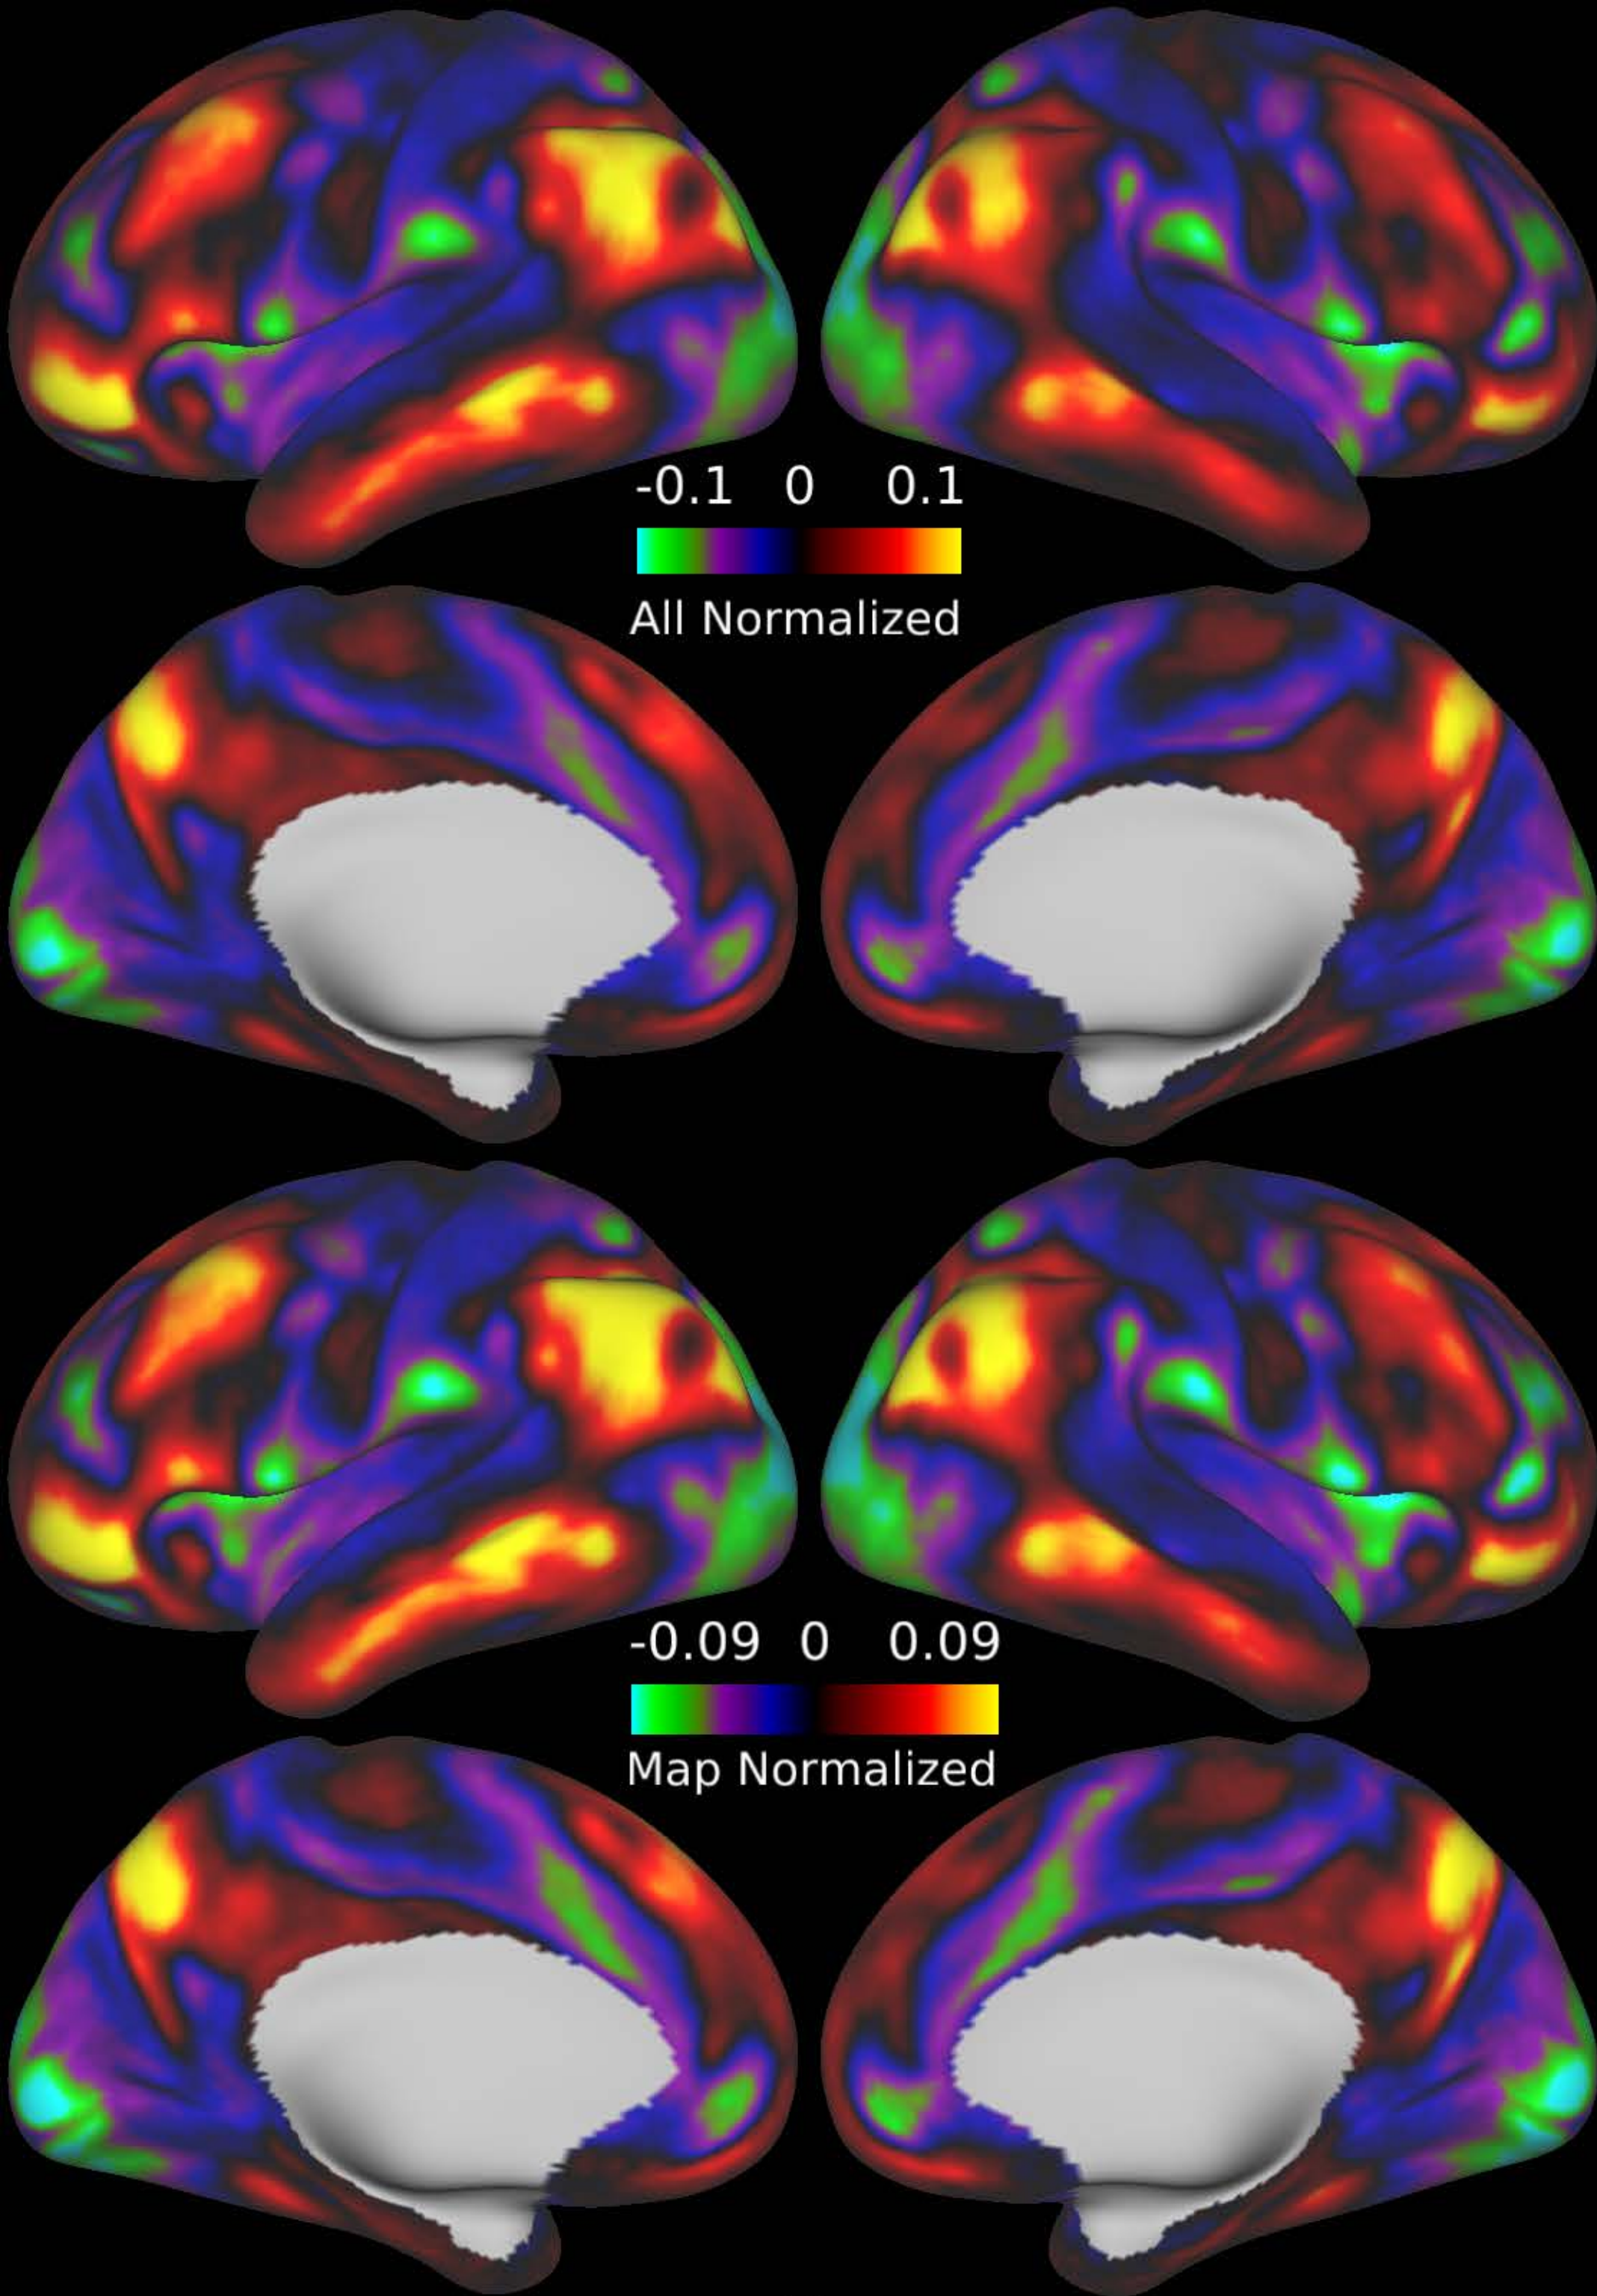

Hertz

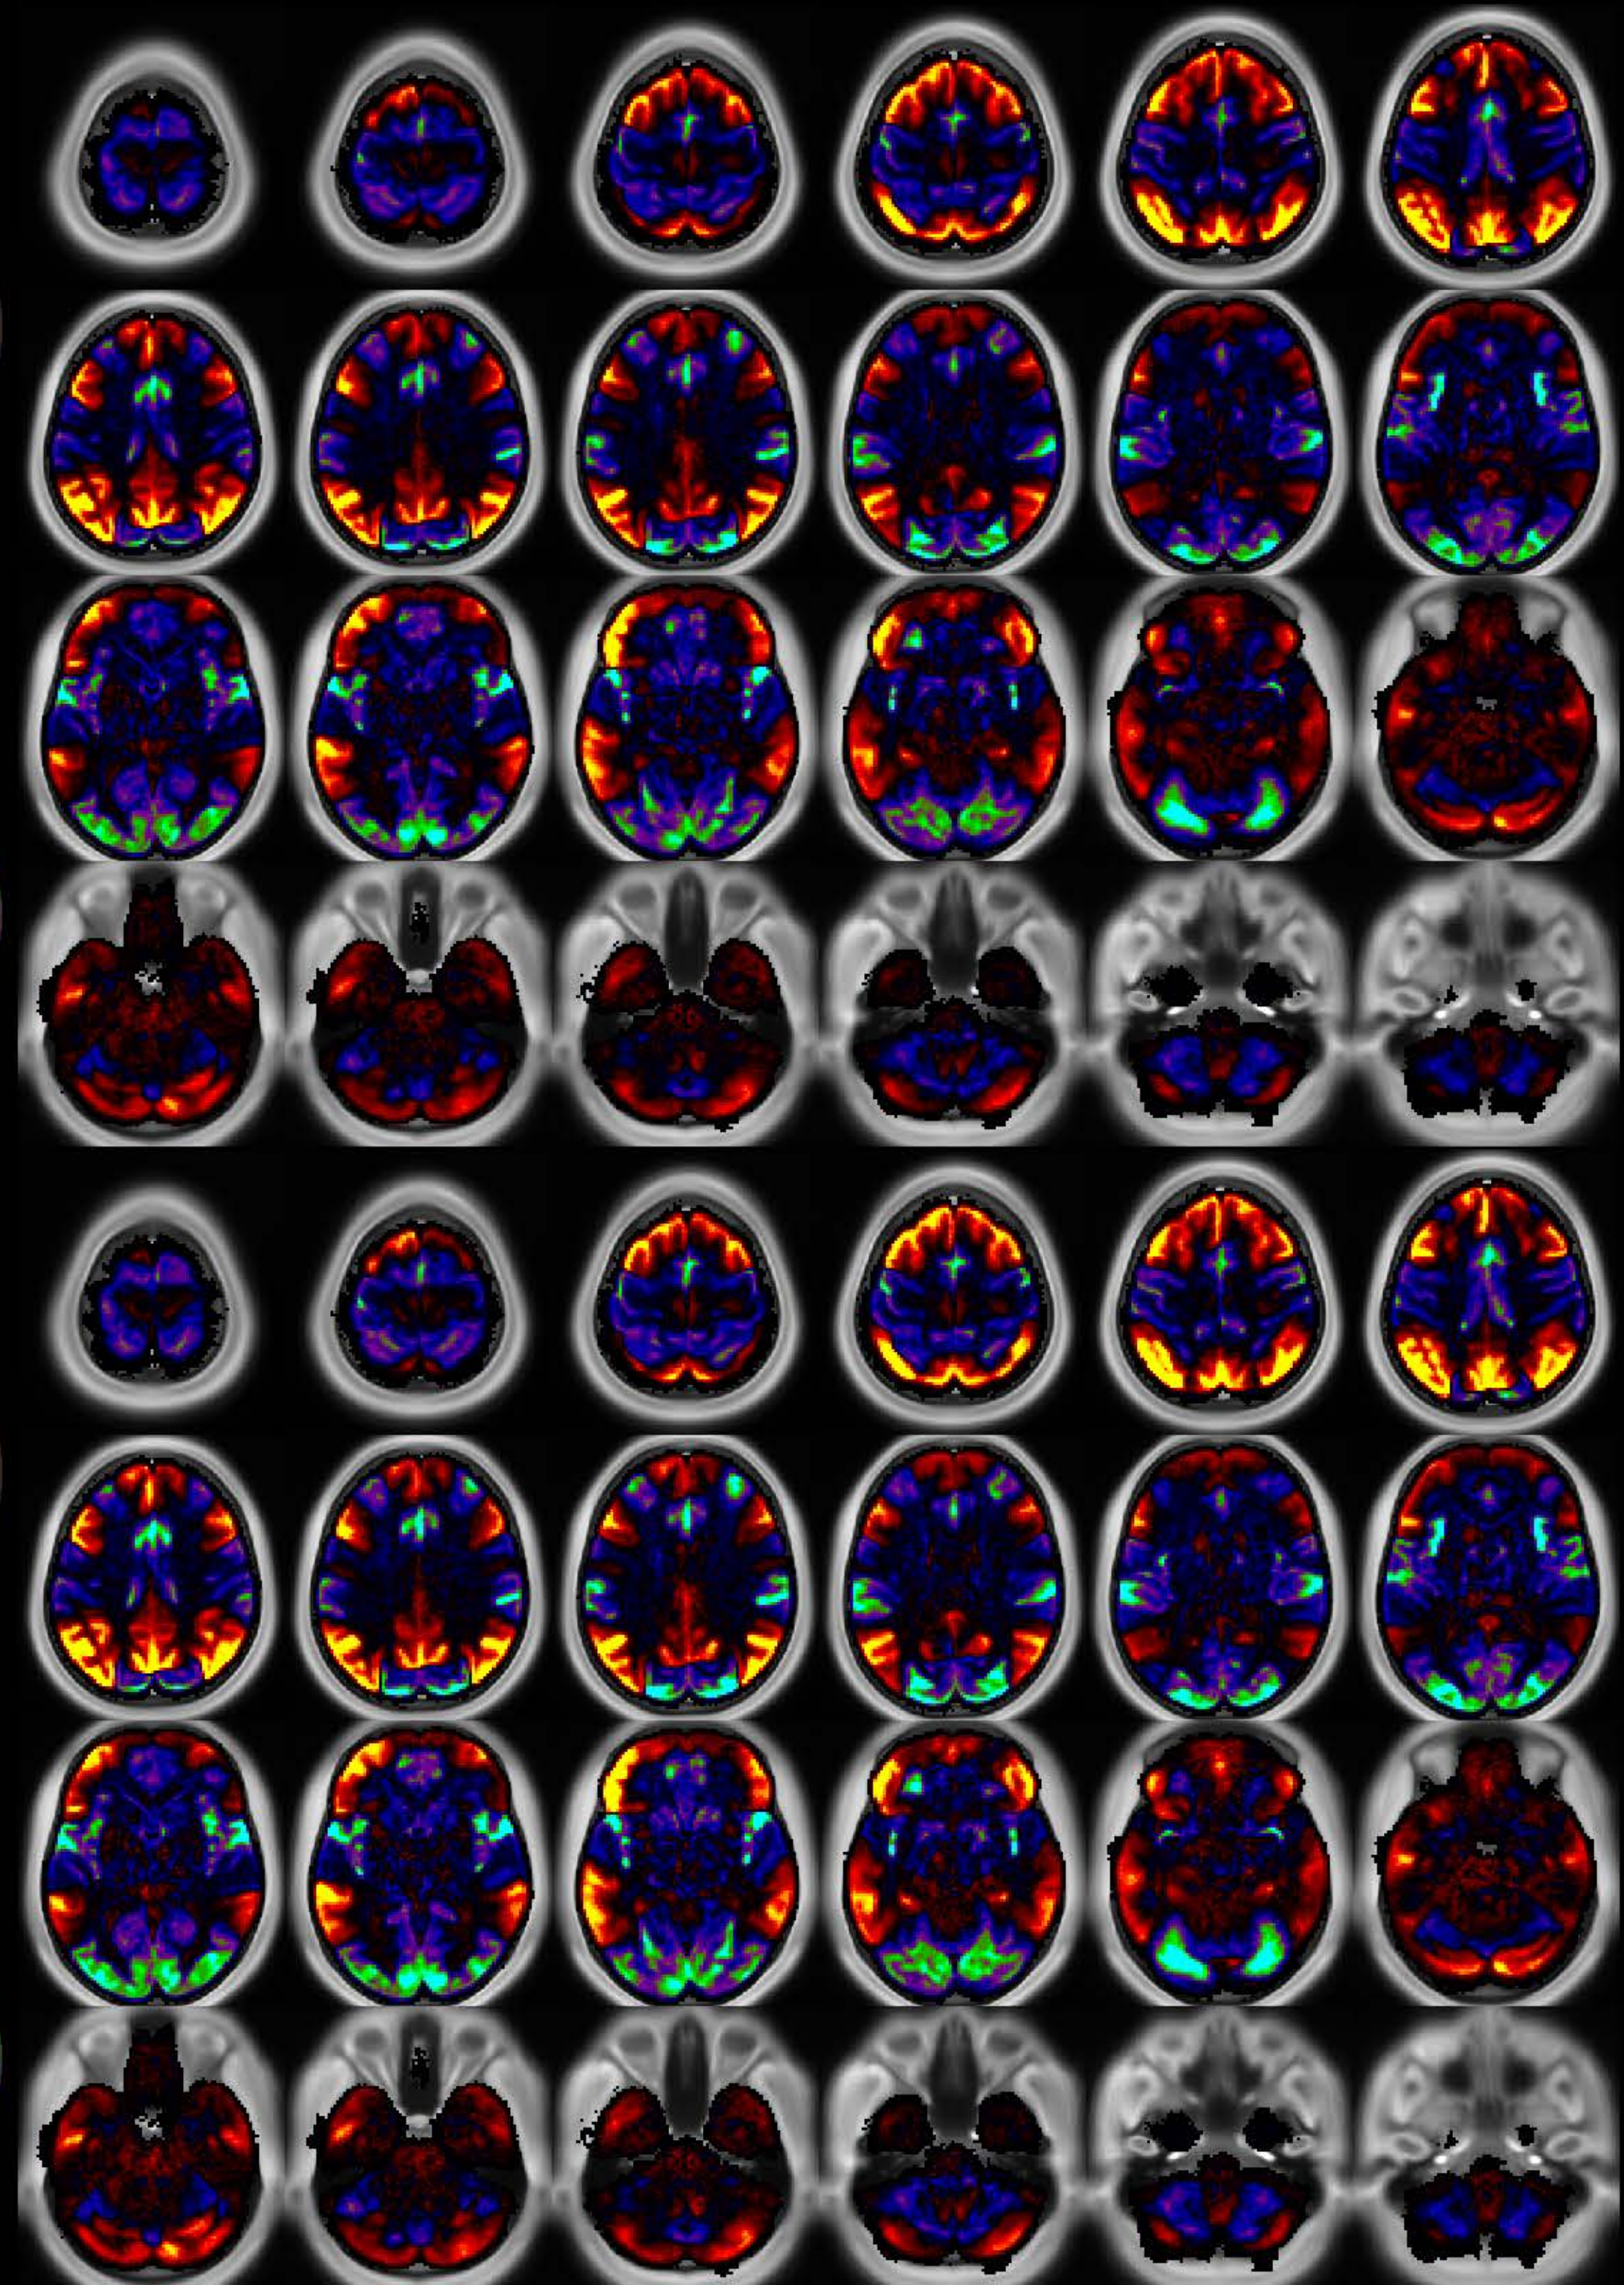

Seconds

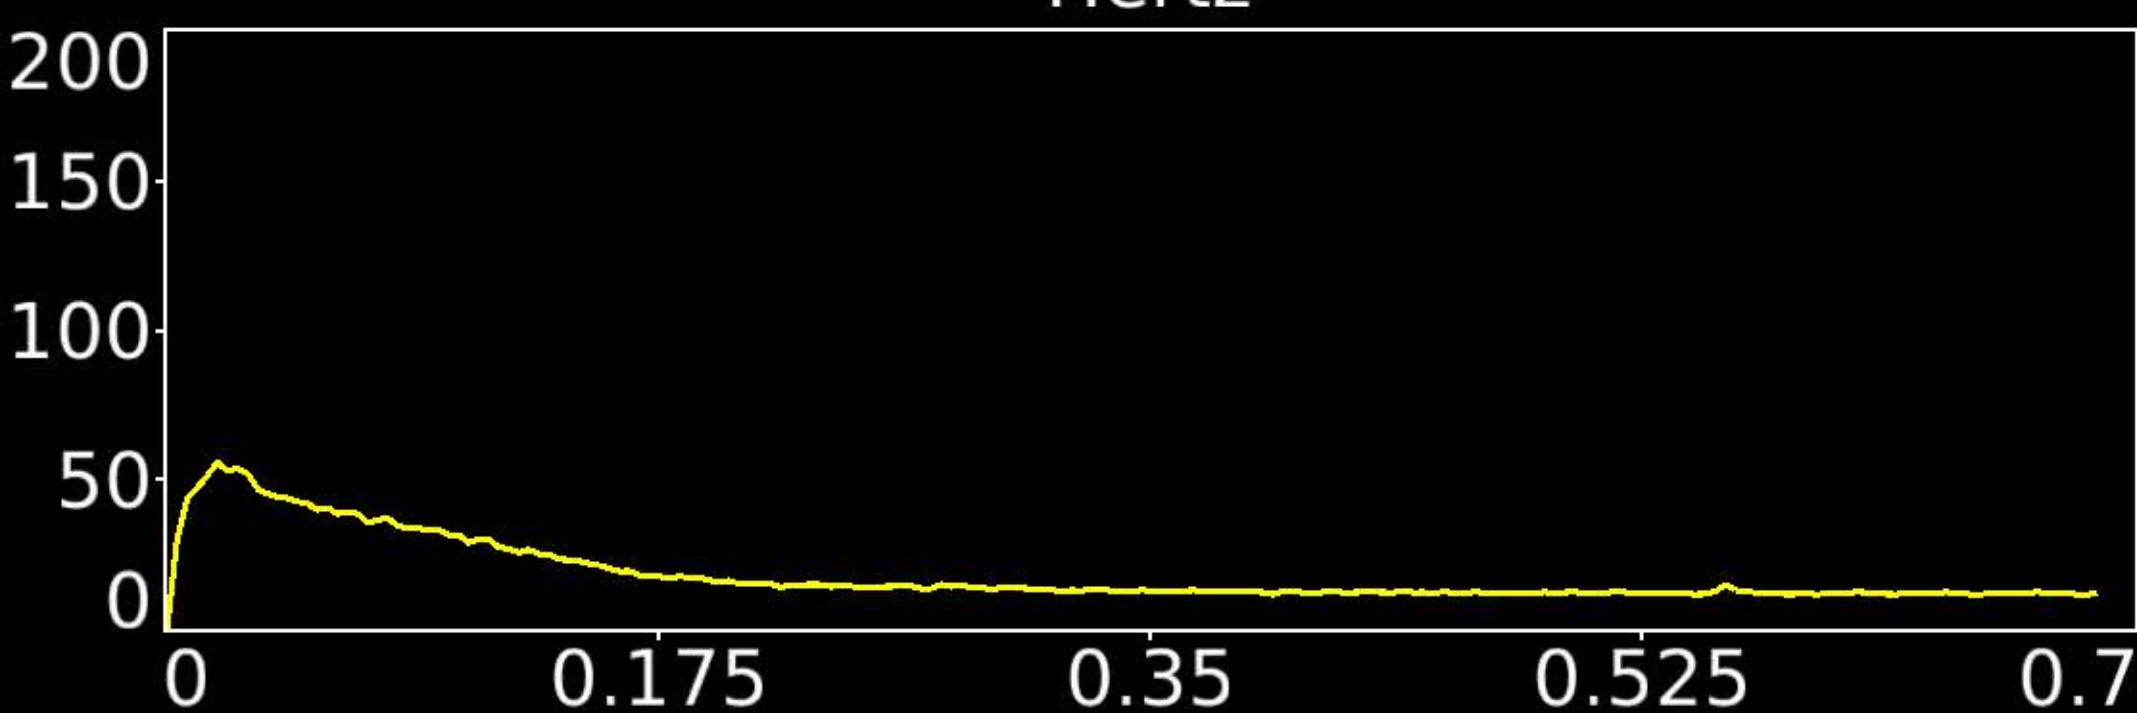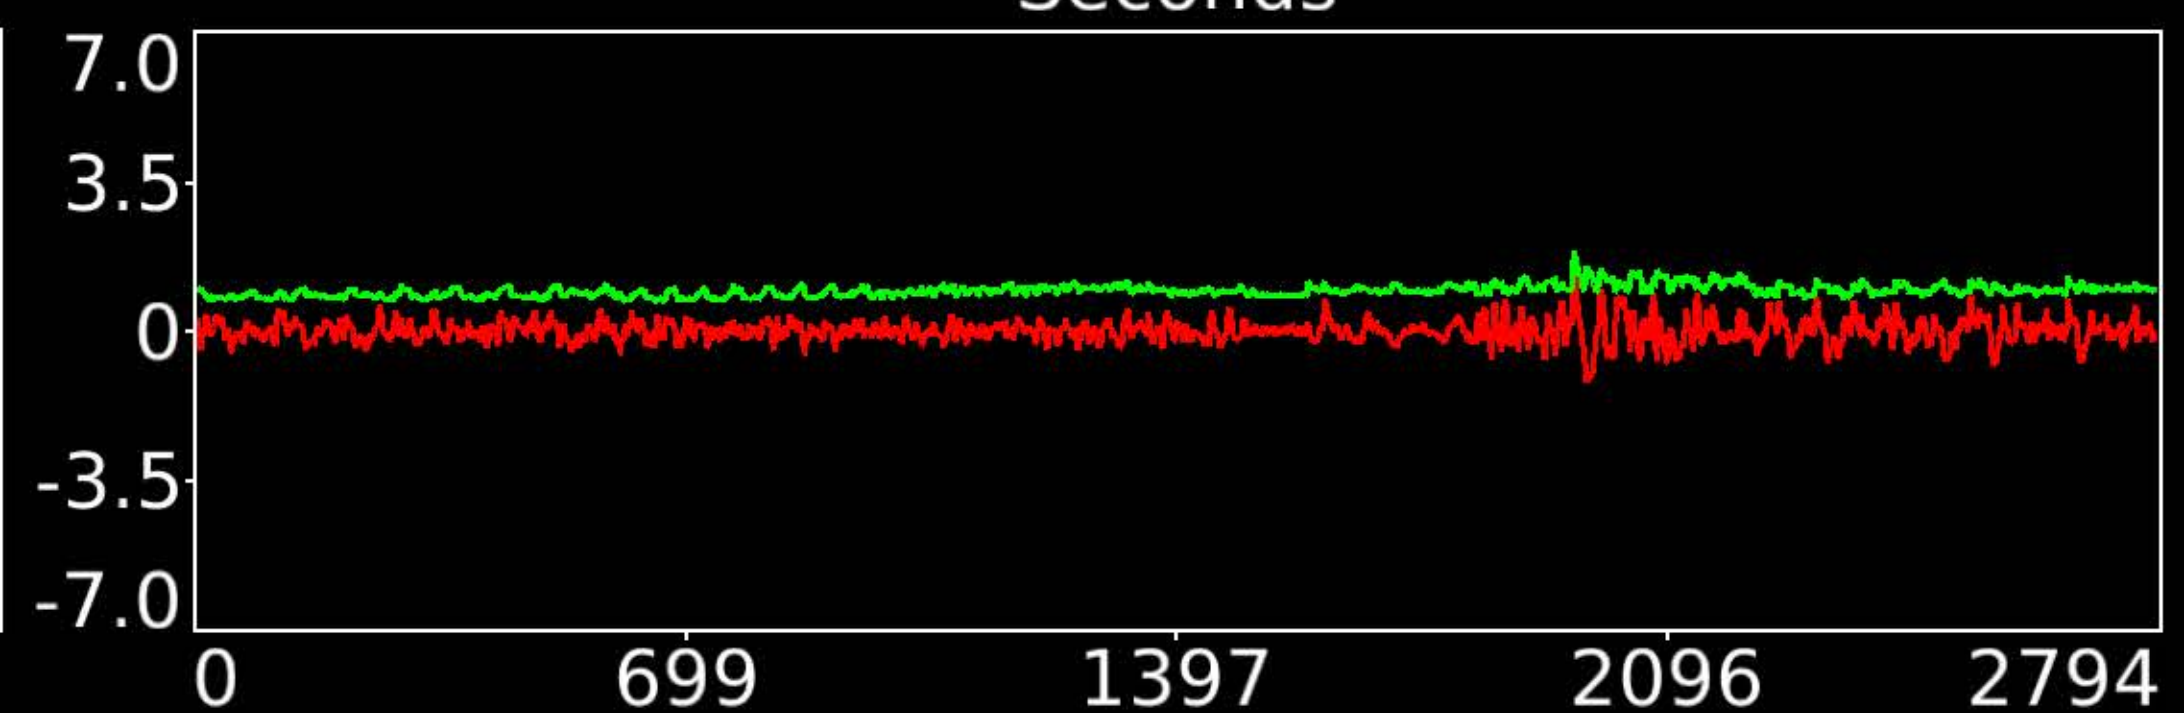

|                           |                            |                               |  |
|---------------------------|----------------------------|-------------------------------|--|
| Number & Class: 25 Signal |                            | Name: Subsidiary Default Mode |  |
| RVT Correlated: No        | DVARS Dip Associated: No   | Cross-Subject Variable: No    |  |
| Single Subject: No        | % Variance Explained: 1.52 | Globality Index: 0.32         |  |
| Rest Component: No        | Taskr Component: No        | Task Modulated: No            |  |

Rationale: Spatial map includes positive and negative patches that respect known RSNs (e.g. Default Mode Network)



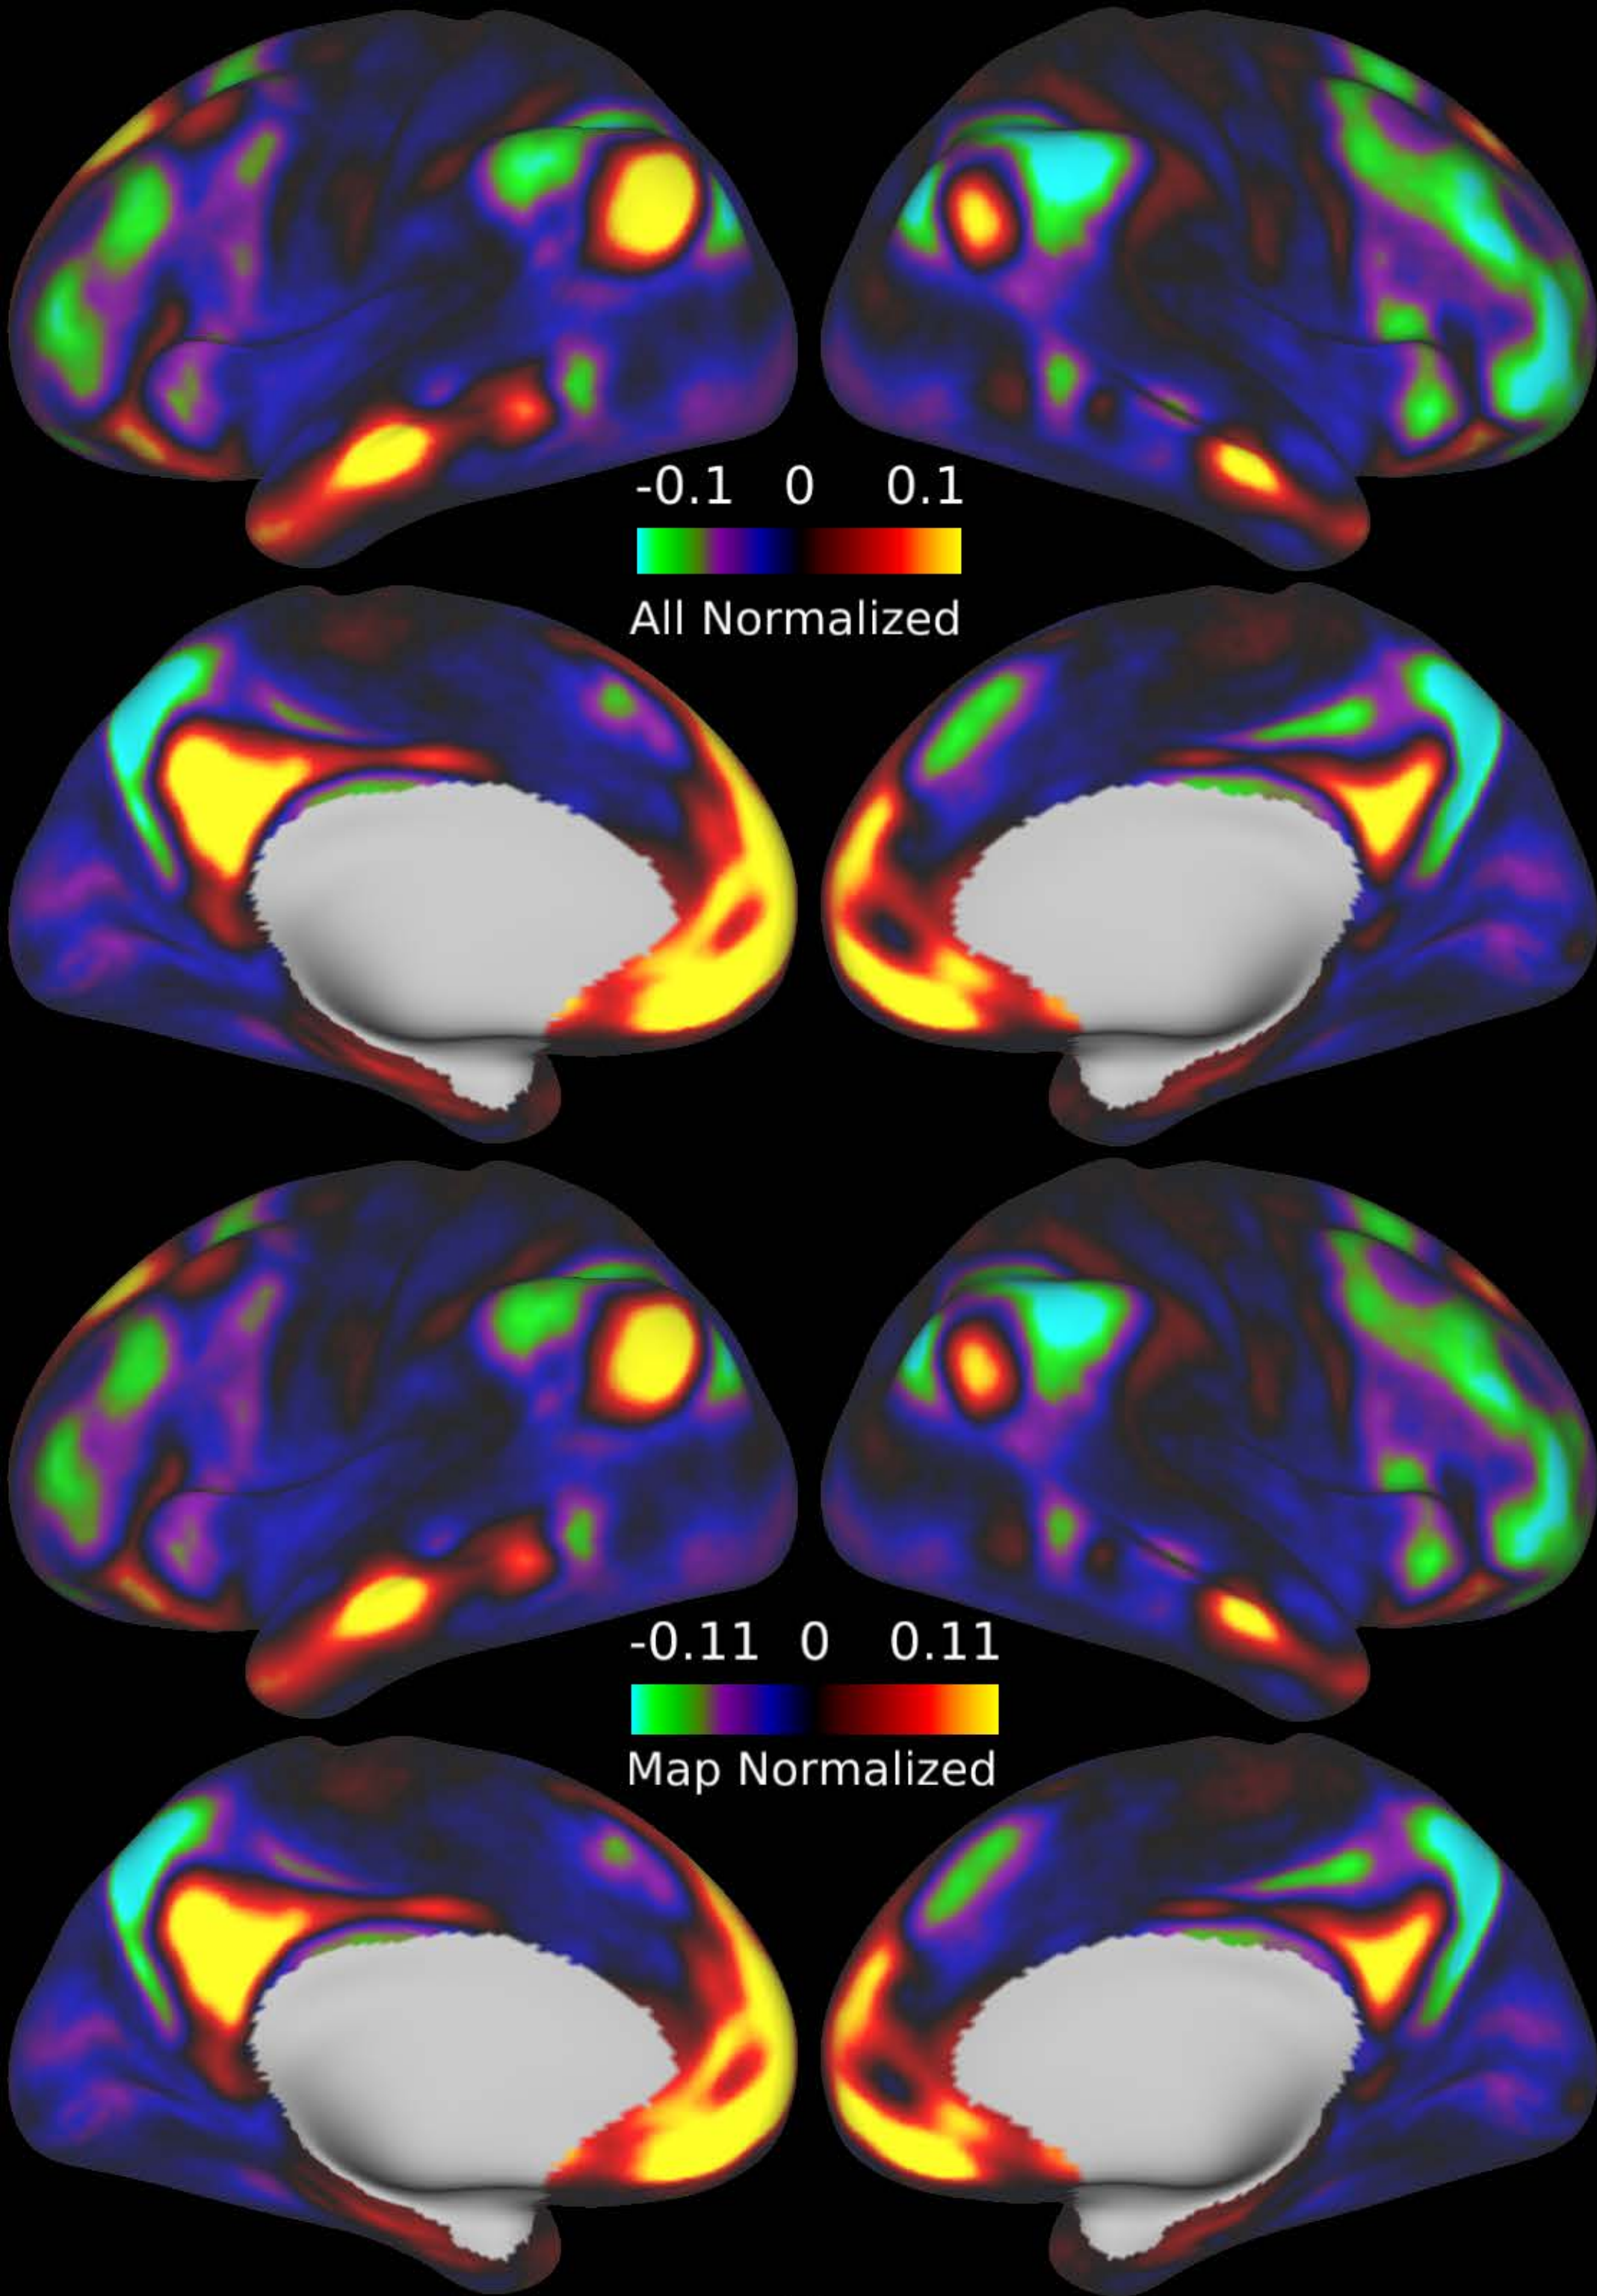

Hertz

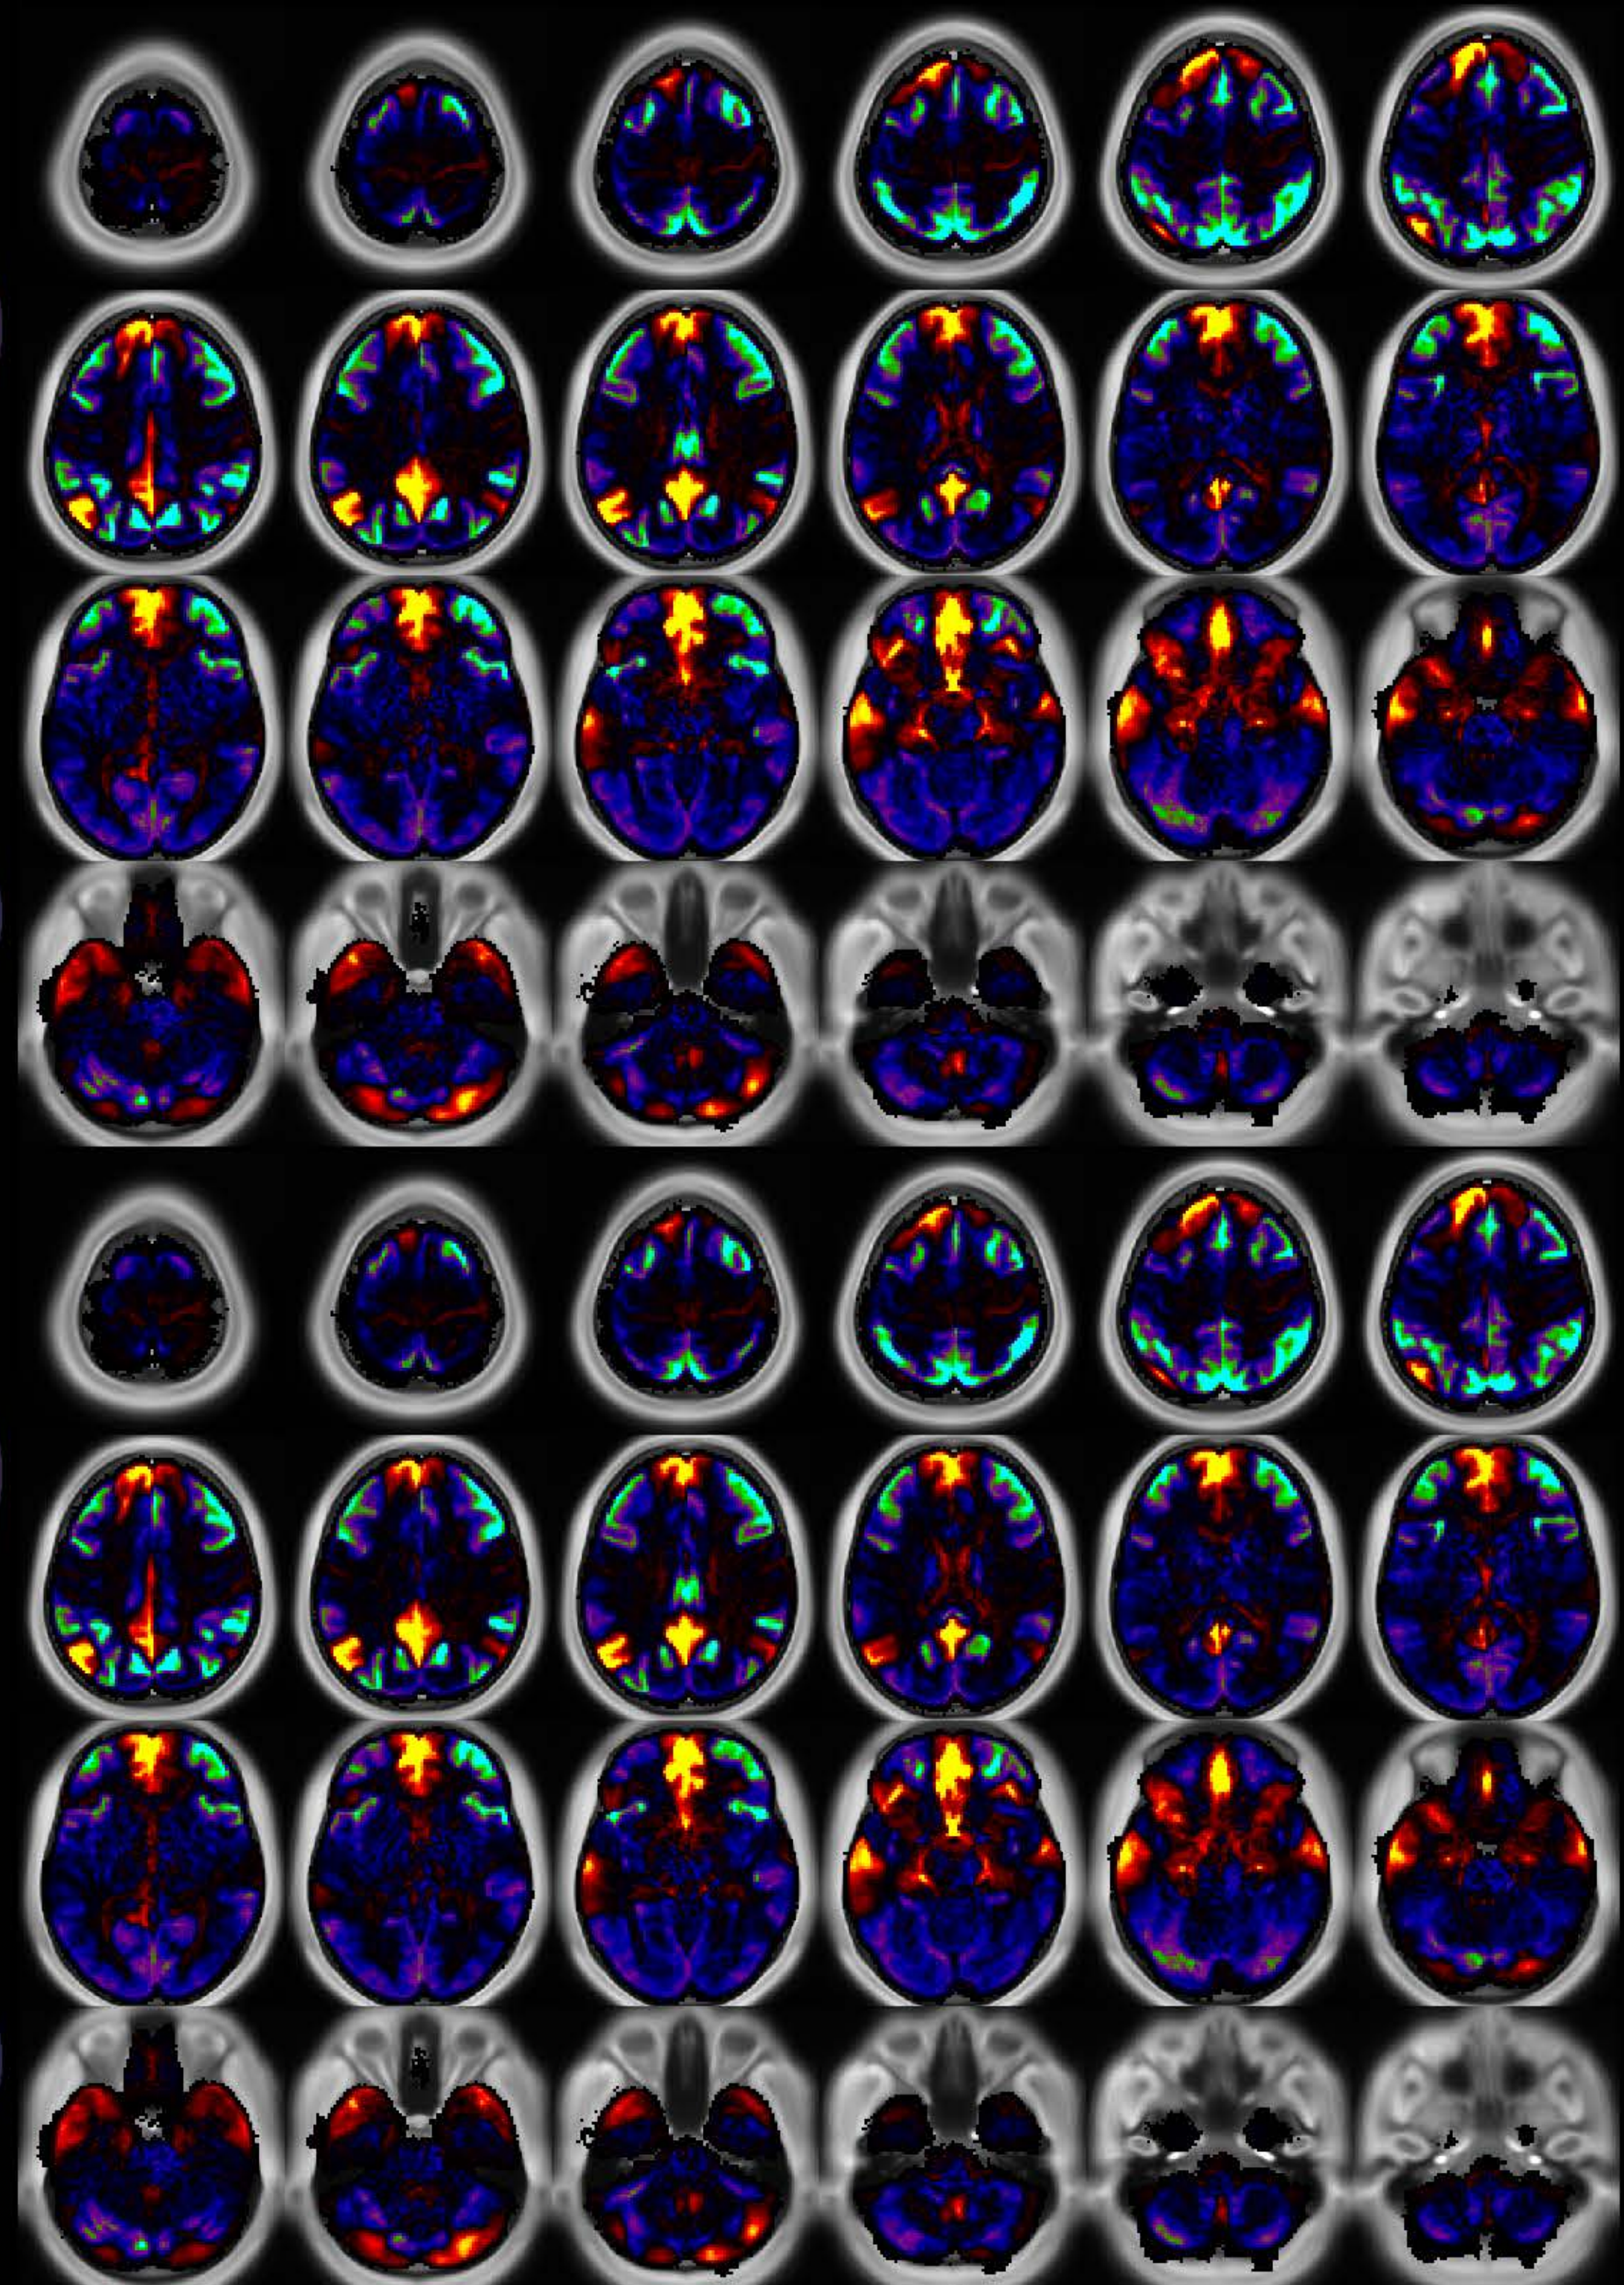

Seconds

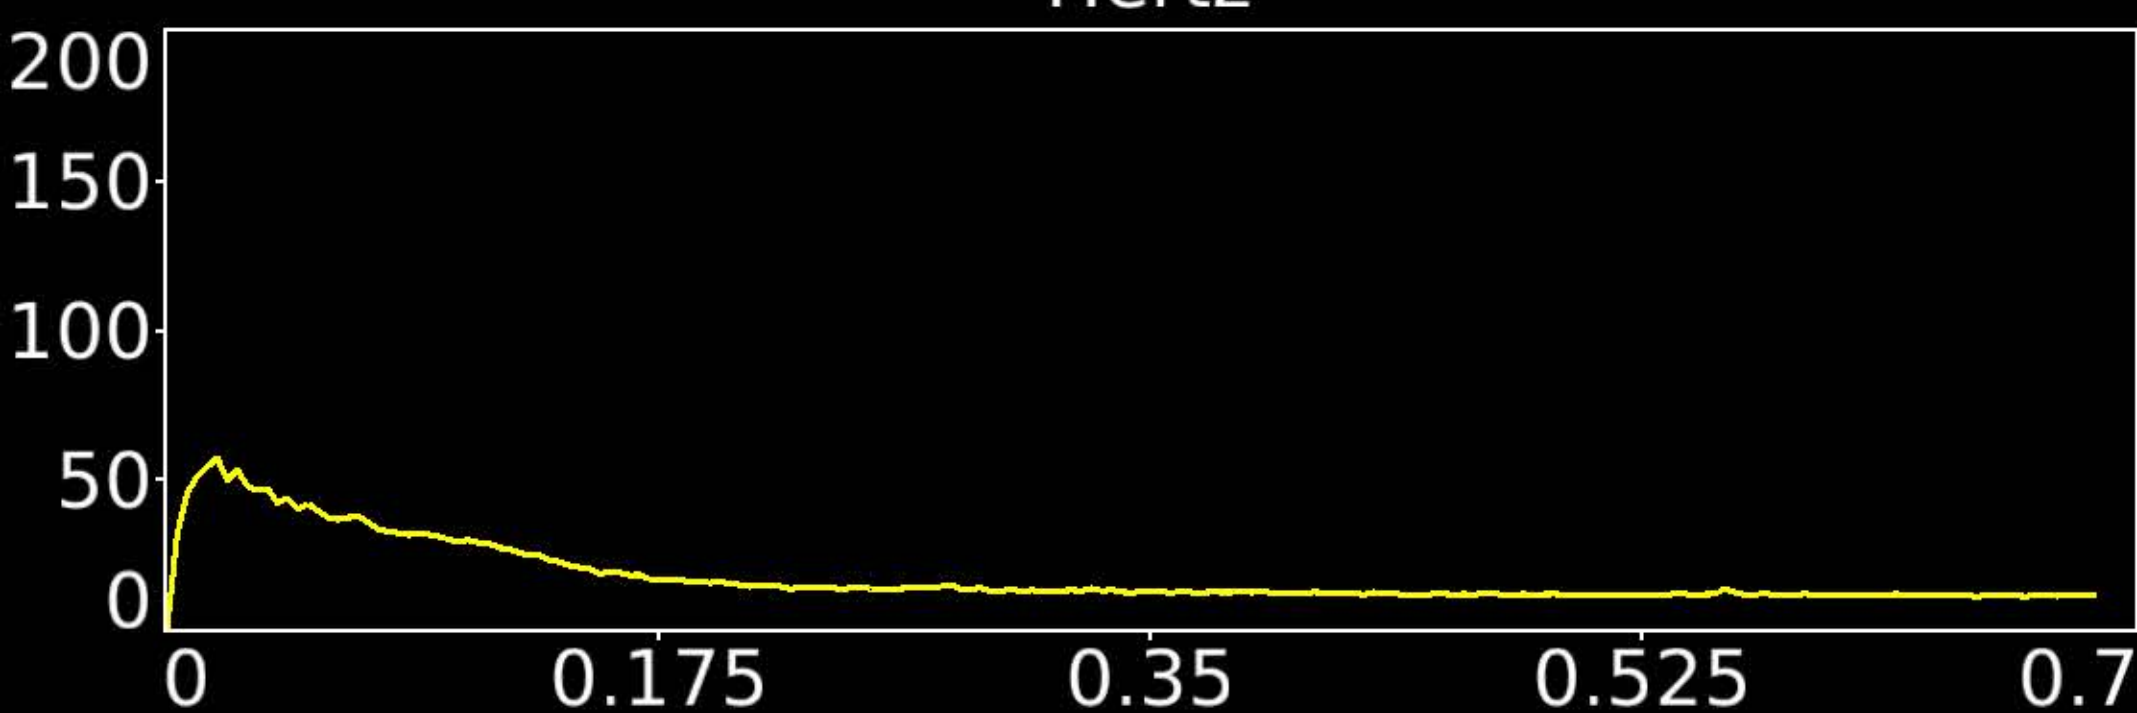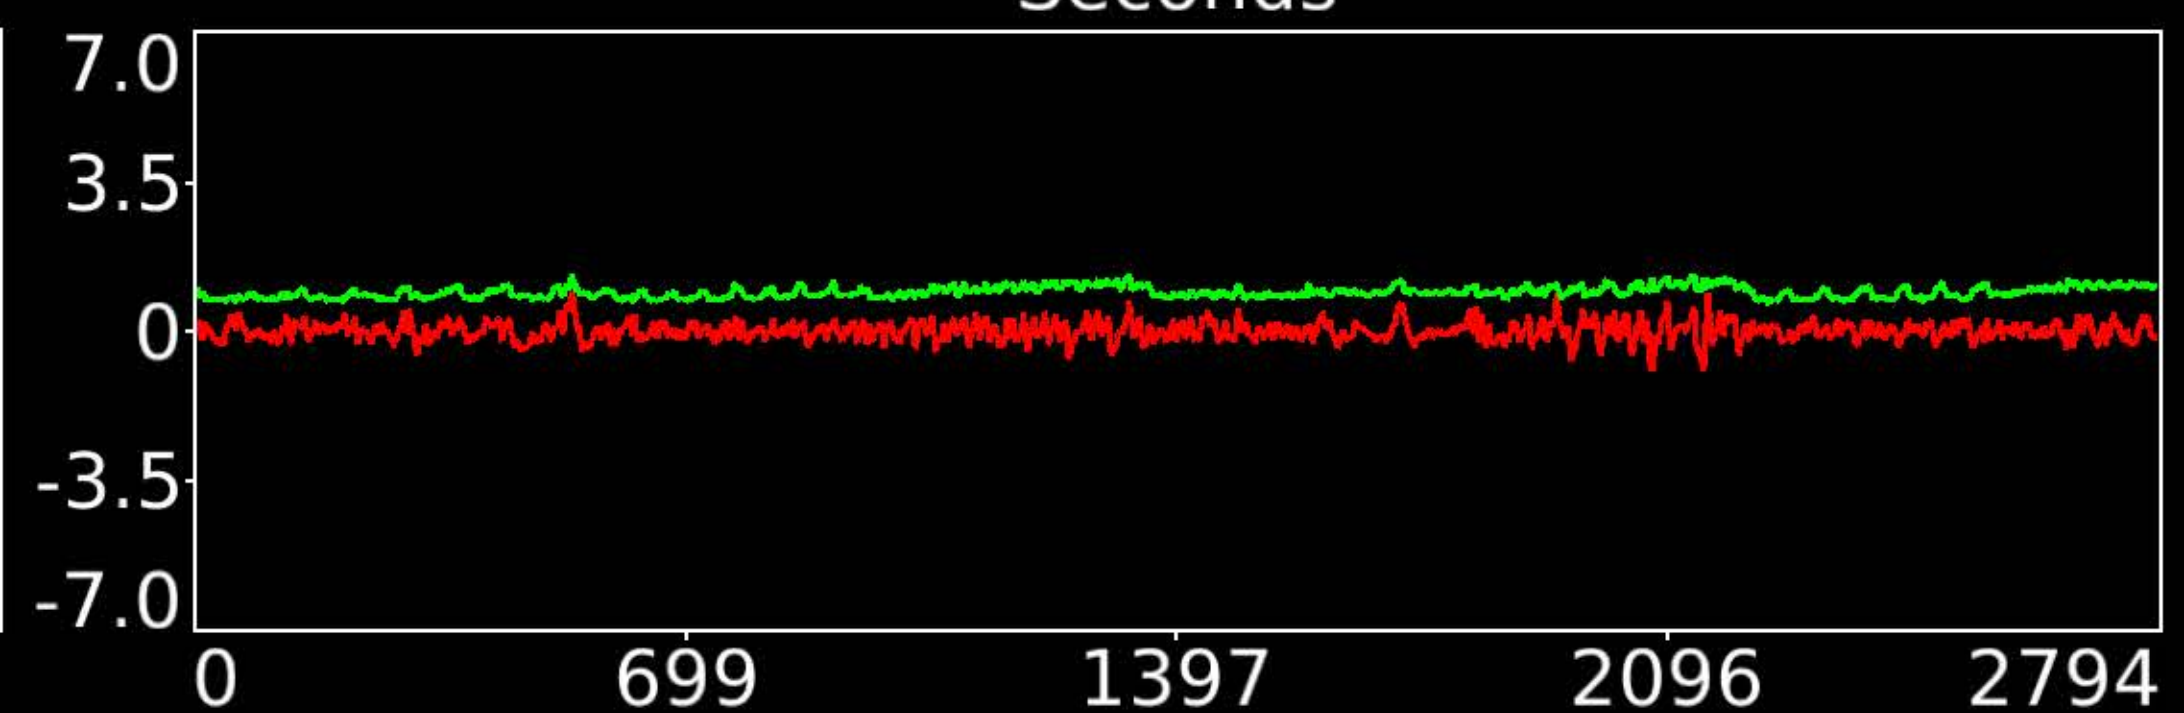

|                                                                                                                   |                            |                               |  |
|-------------------------------------------------------------------------------------------------------------------|----------------------------|-------------------------------|--|
| Number & Class: 26 Signal                                                                                         |                            | Name: Subsidiary Default Mode |  |
| RVT Correlated: No                                                                                                | DVARS Dip Associated: No   | Cross-Subject Variable: No    |  |
| Single Subject: No                                                                                                | % Variance Explained: 1.45 | Globality Index: 1.4          |  |
| Rest Component: 15                                                                                                | Taskr Component: No        | Task Modulated: No            |  |
| Rationale: Spatial map includes positive and negative patches that respect known RSNs (e.g. Default Mode Network) |                            |                               |  |



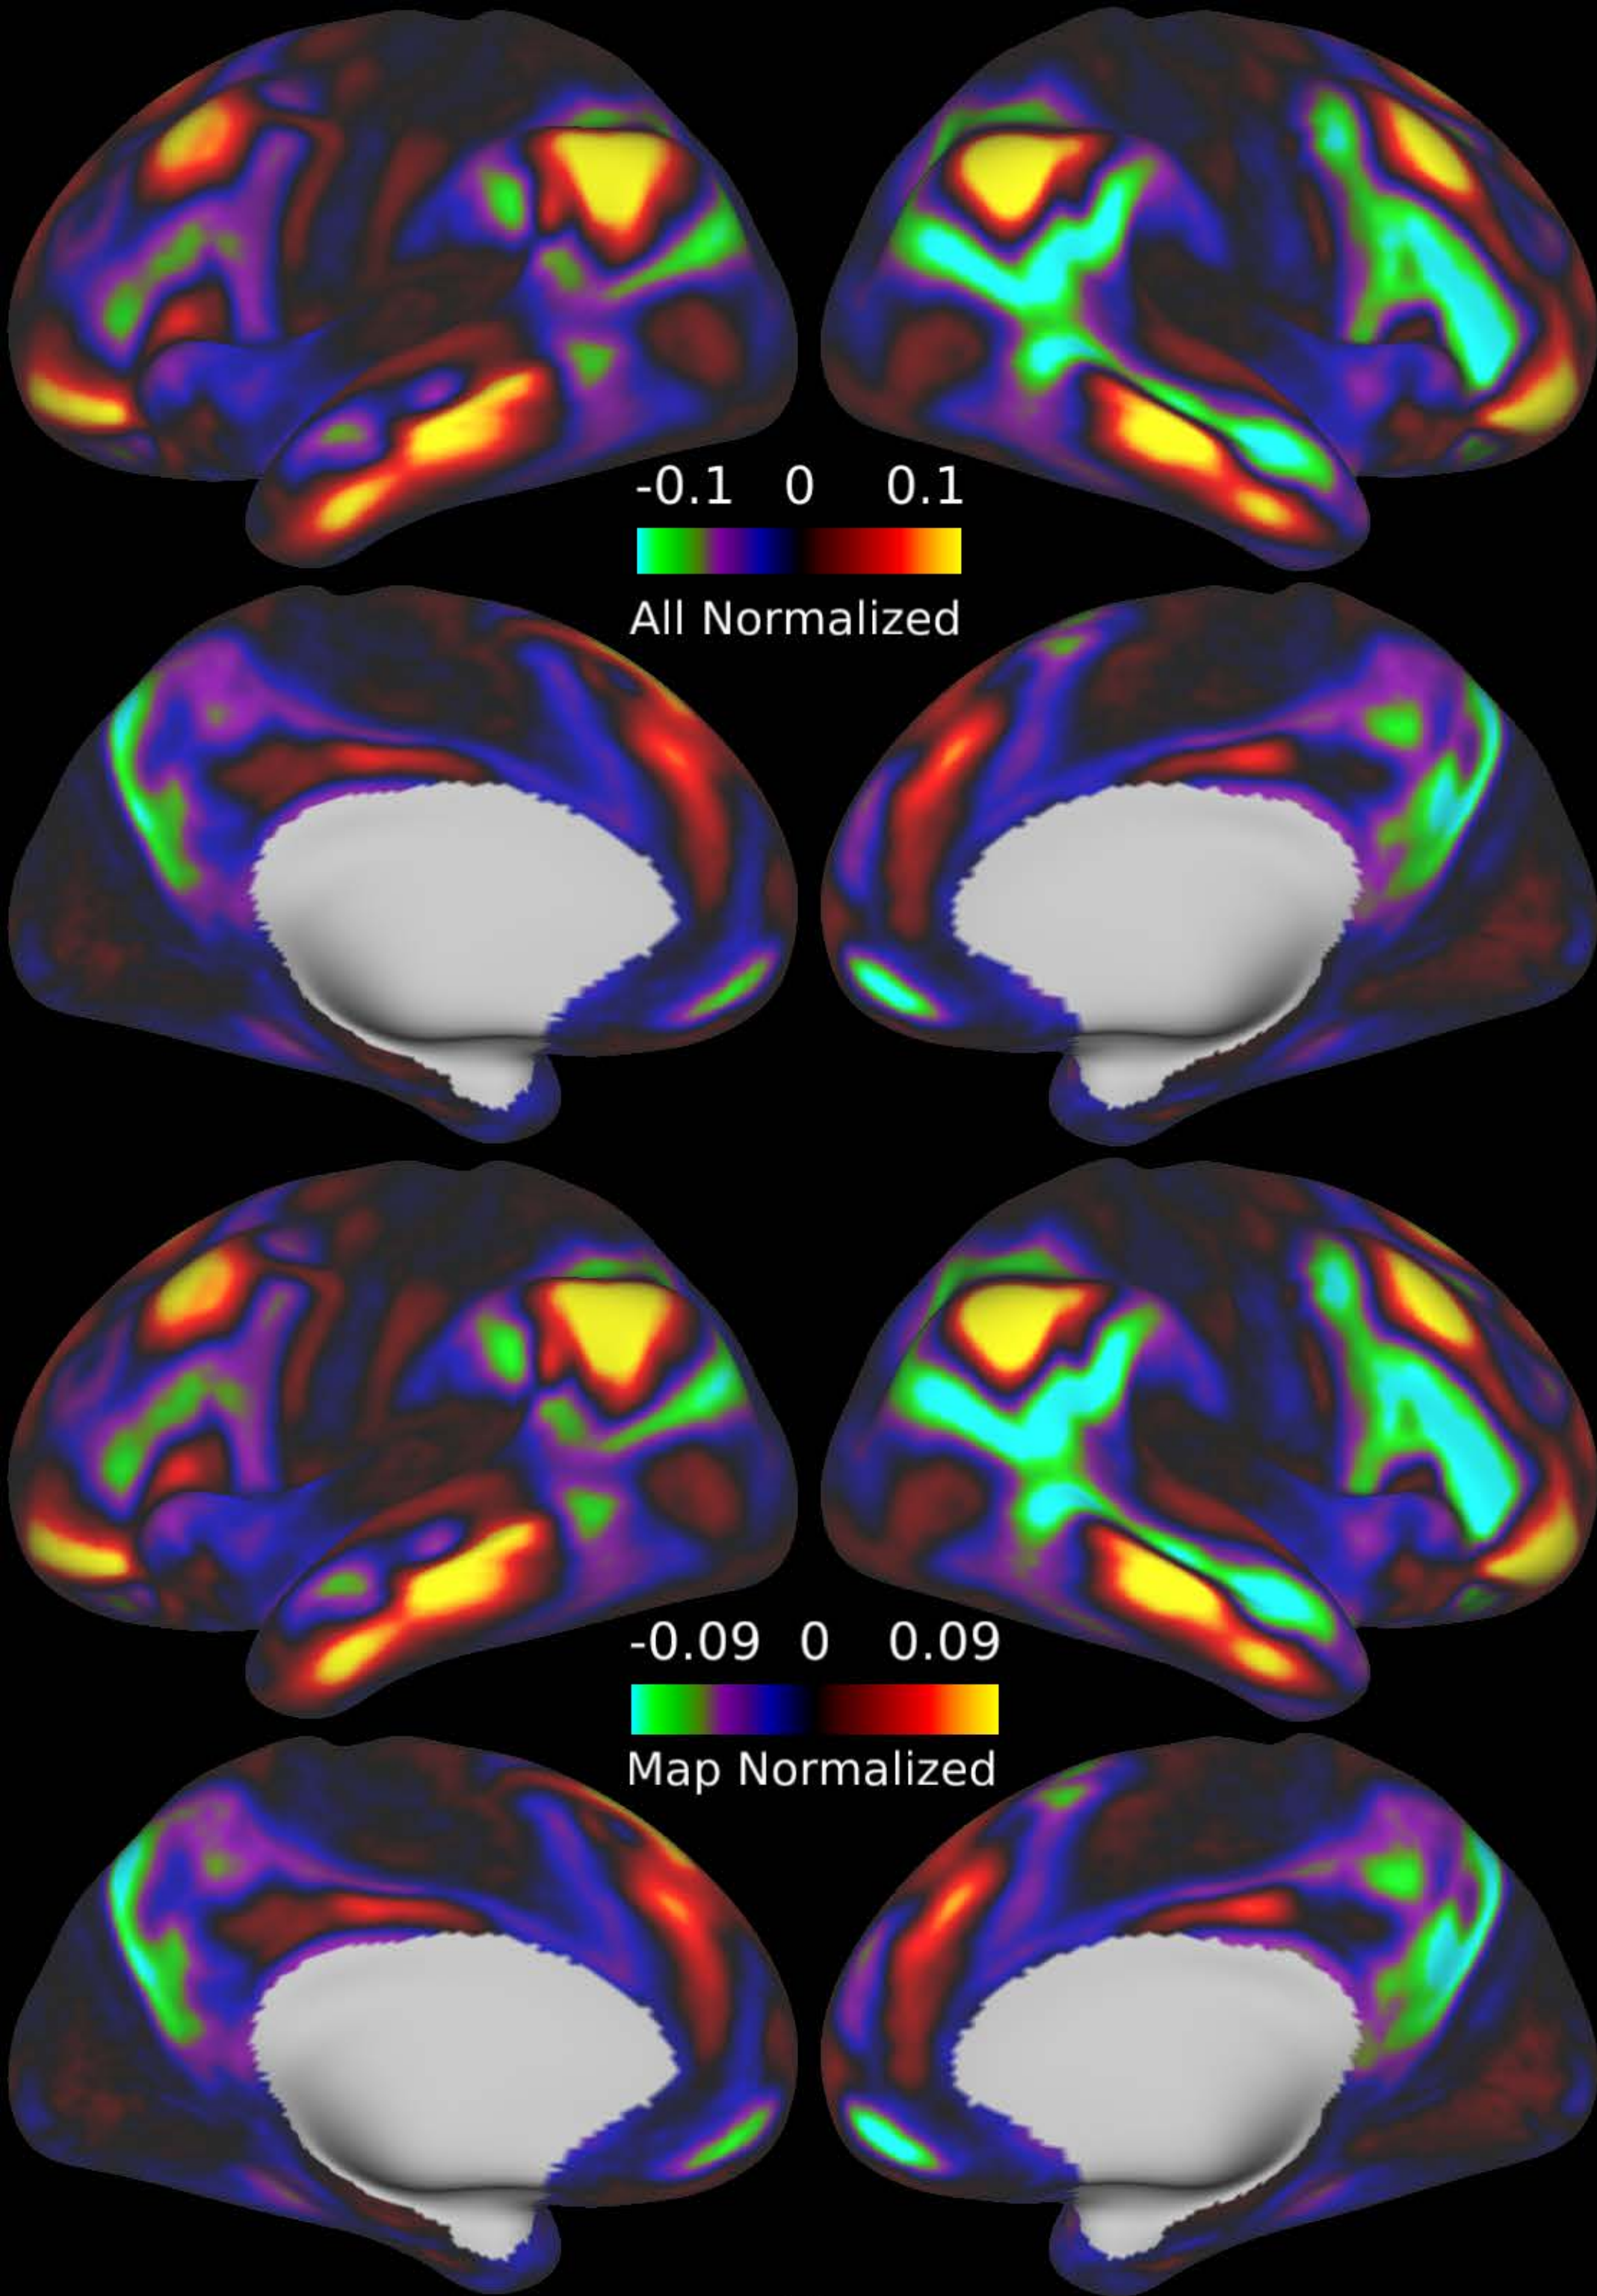

Hertz

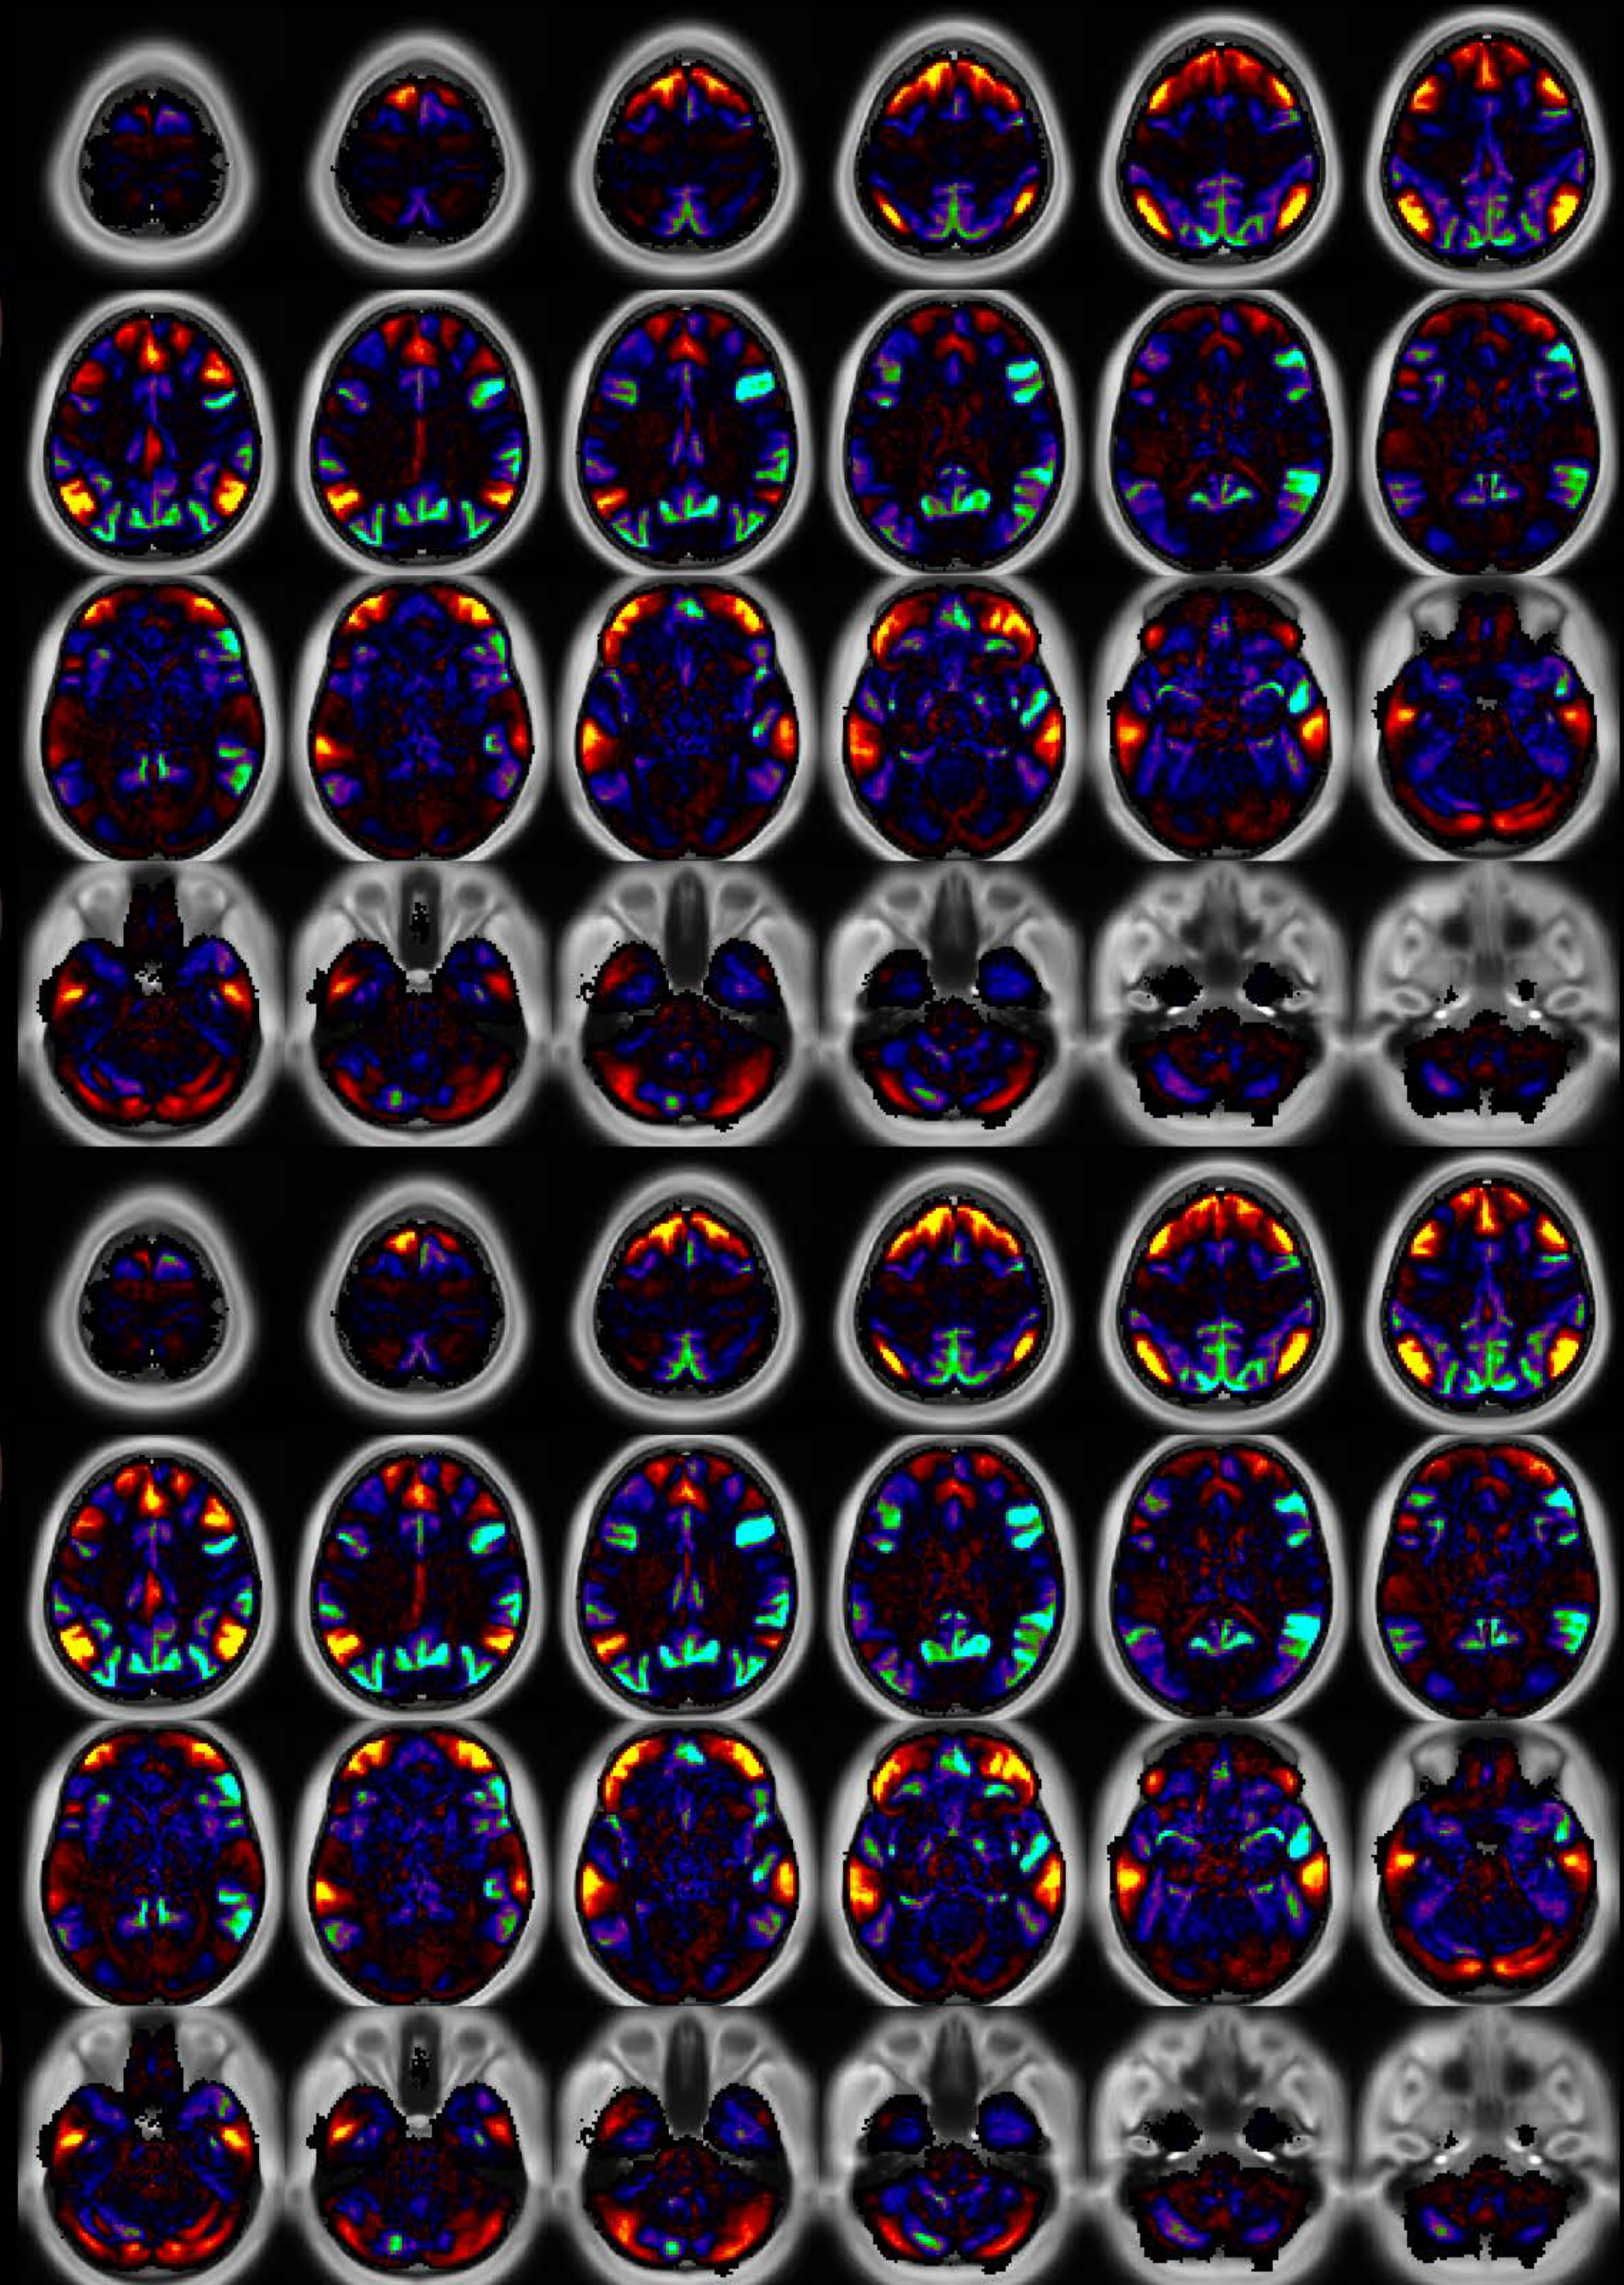

Seconds

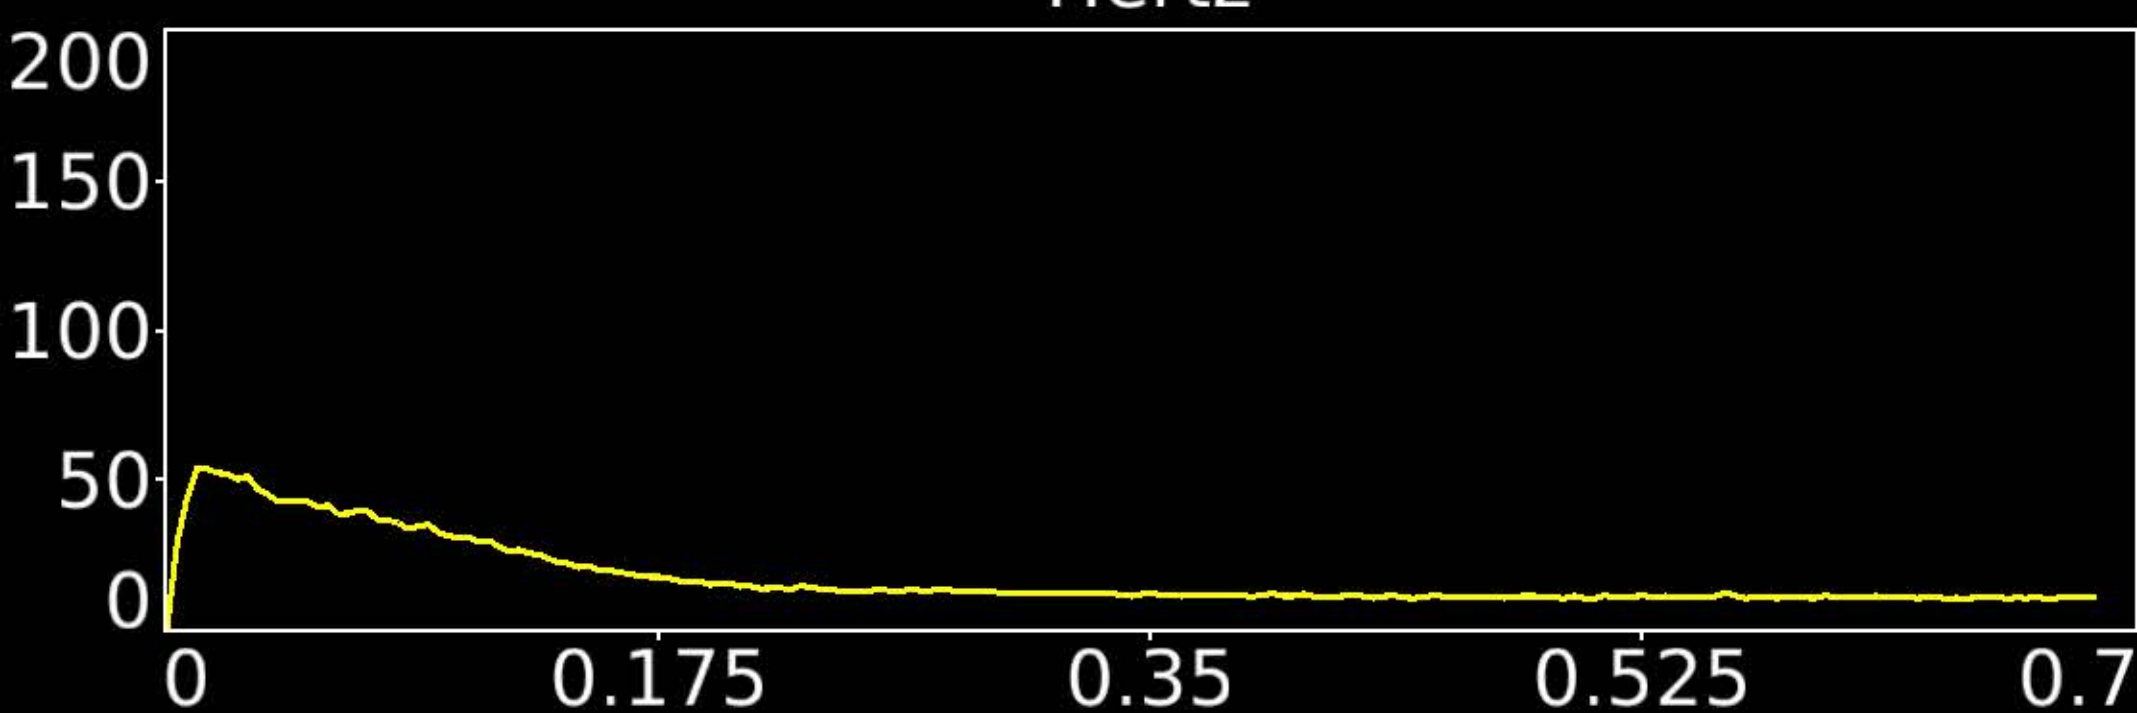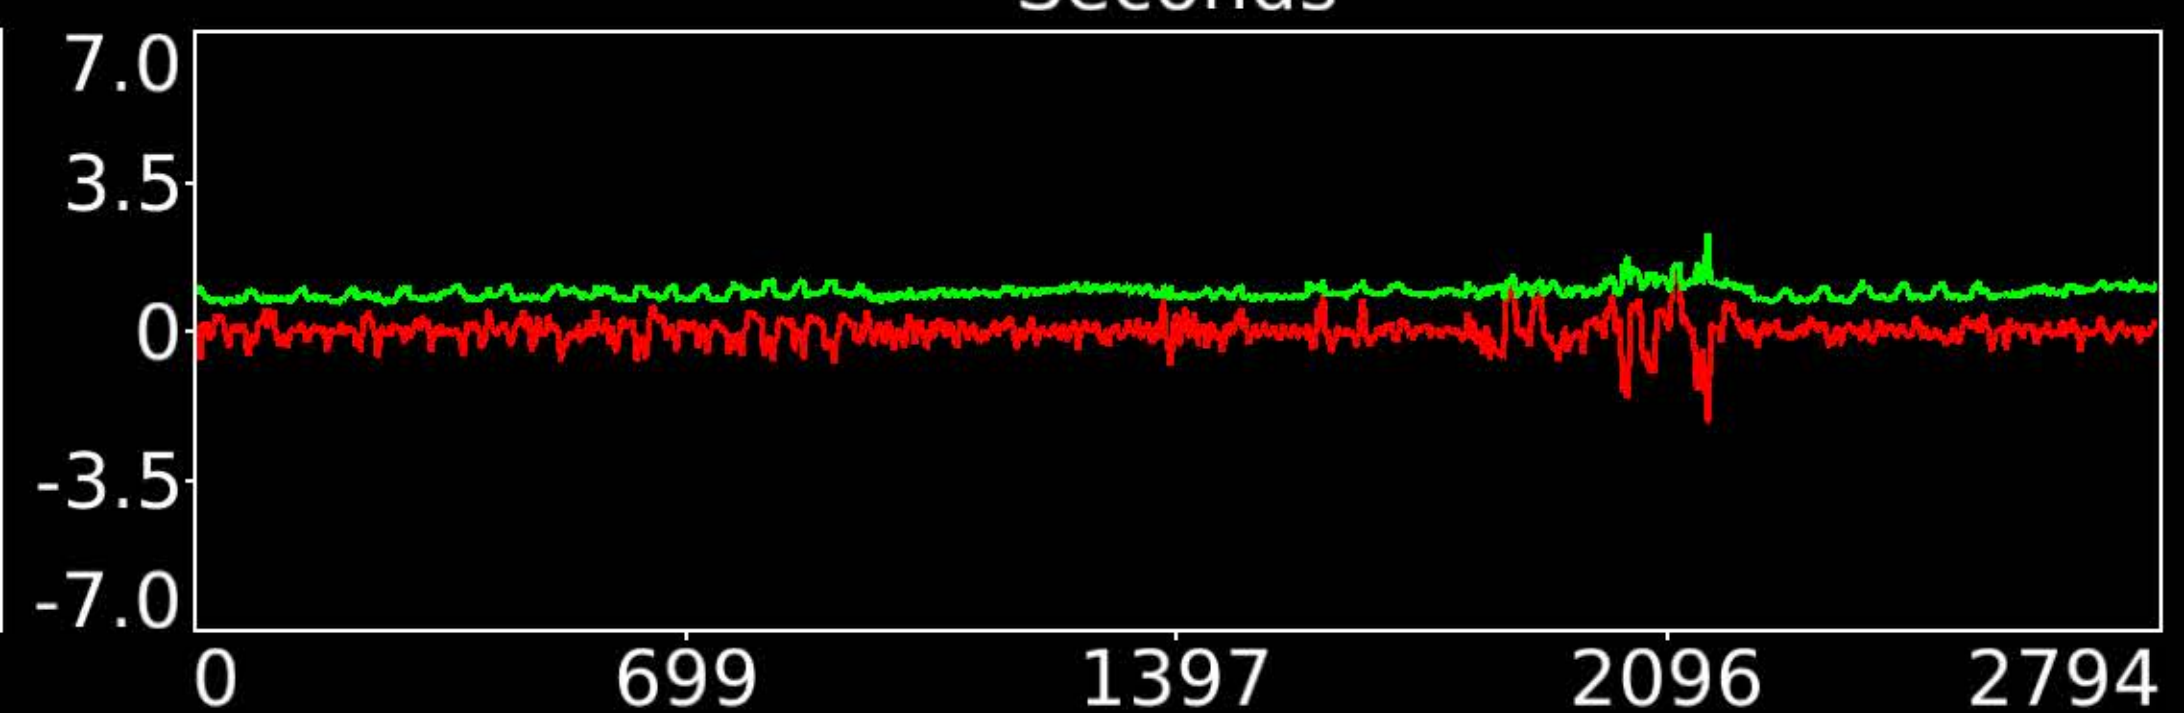

|                                                                                                                   |                            |                               |  |
|-------------------------------------------------------------------------------------------------------------------|----------------------------|-------------------------------|--|
| Number & Class: 27 Signal                                                                                         |                            | Name: Subsidiary Default Mode |  |
| RVT Correlated: No                                                                                                | DVARS Dip Associated: No   | Cross-Subject Variable: No    |  |
| Single Subject: No                                                                                                | % Variance Explained: 1.42 | Globality Index: 0.64         |  |
| Rest Component: No                                                                                                | Taskr Component: No        | Task Modulated: No            |  |
| Rationale: Spatial map includes positive and negative patches that respect known RSNs (e.g. Default Mode Network) |                            |                               |  |



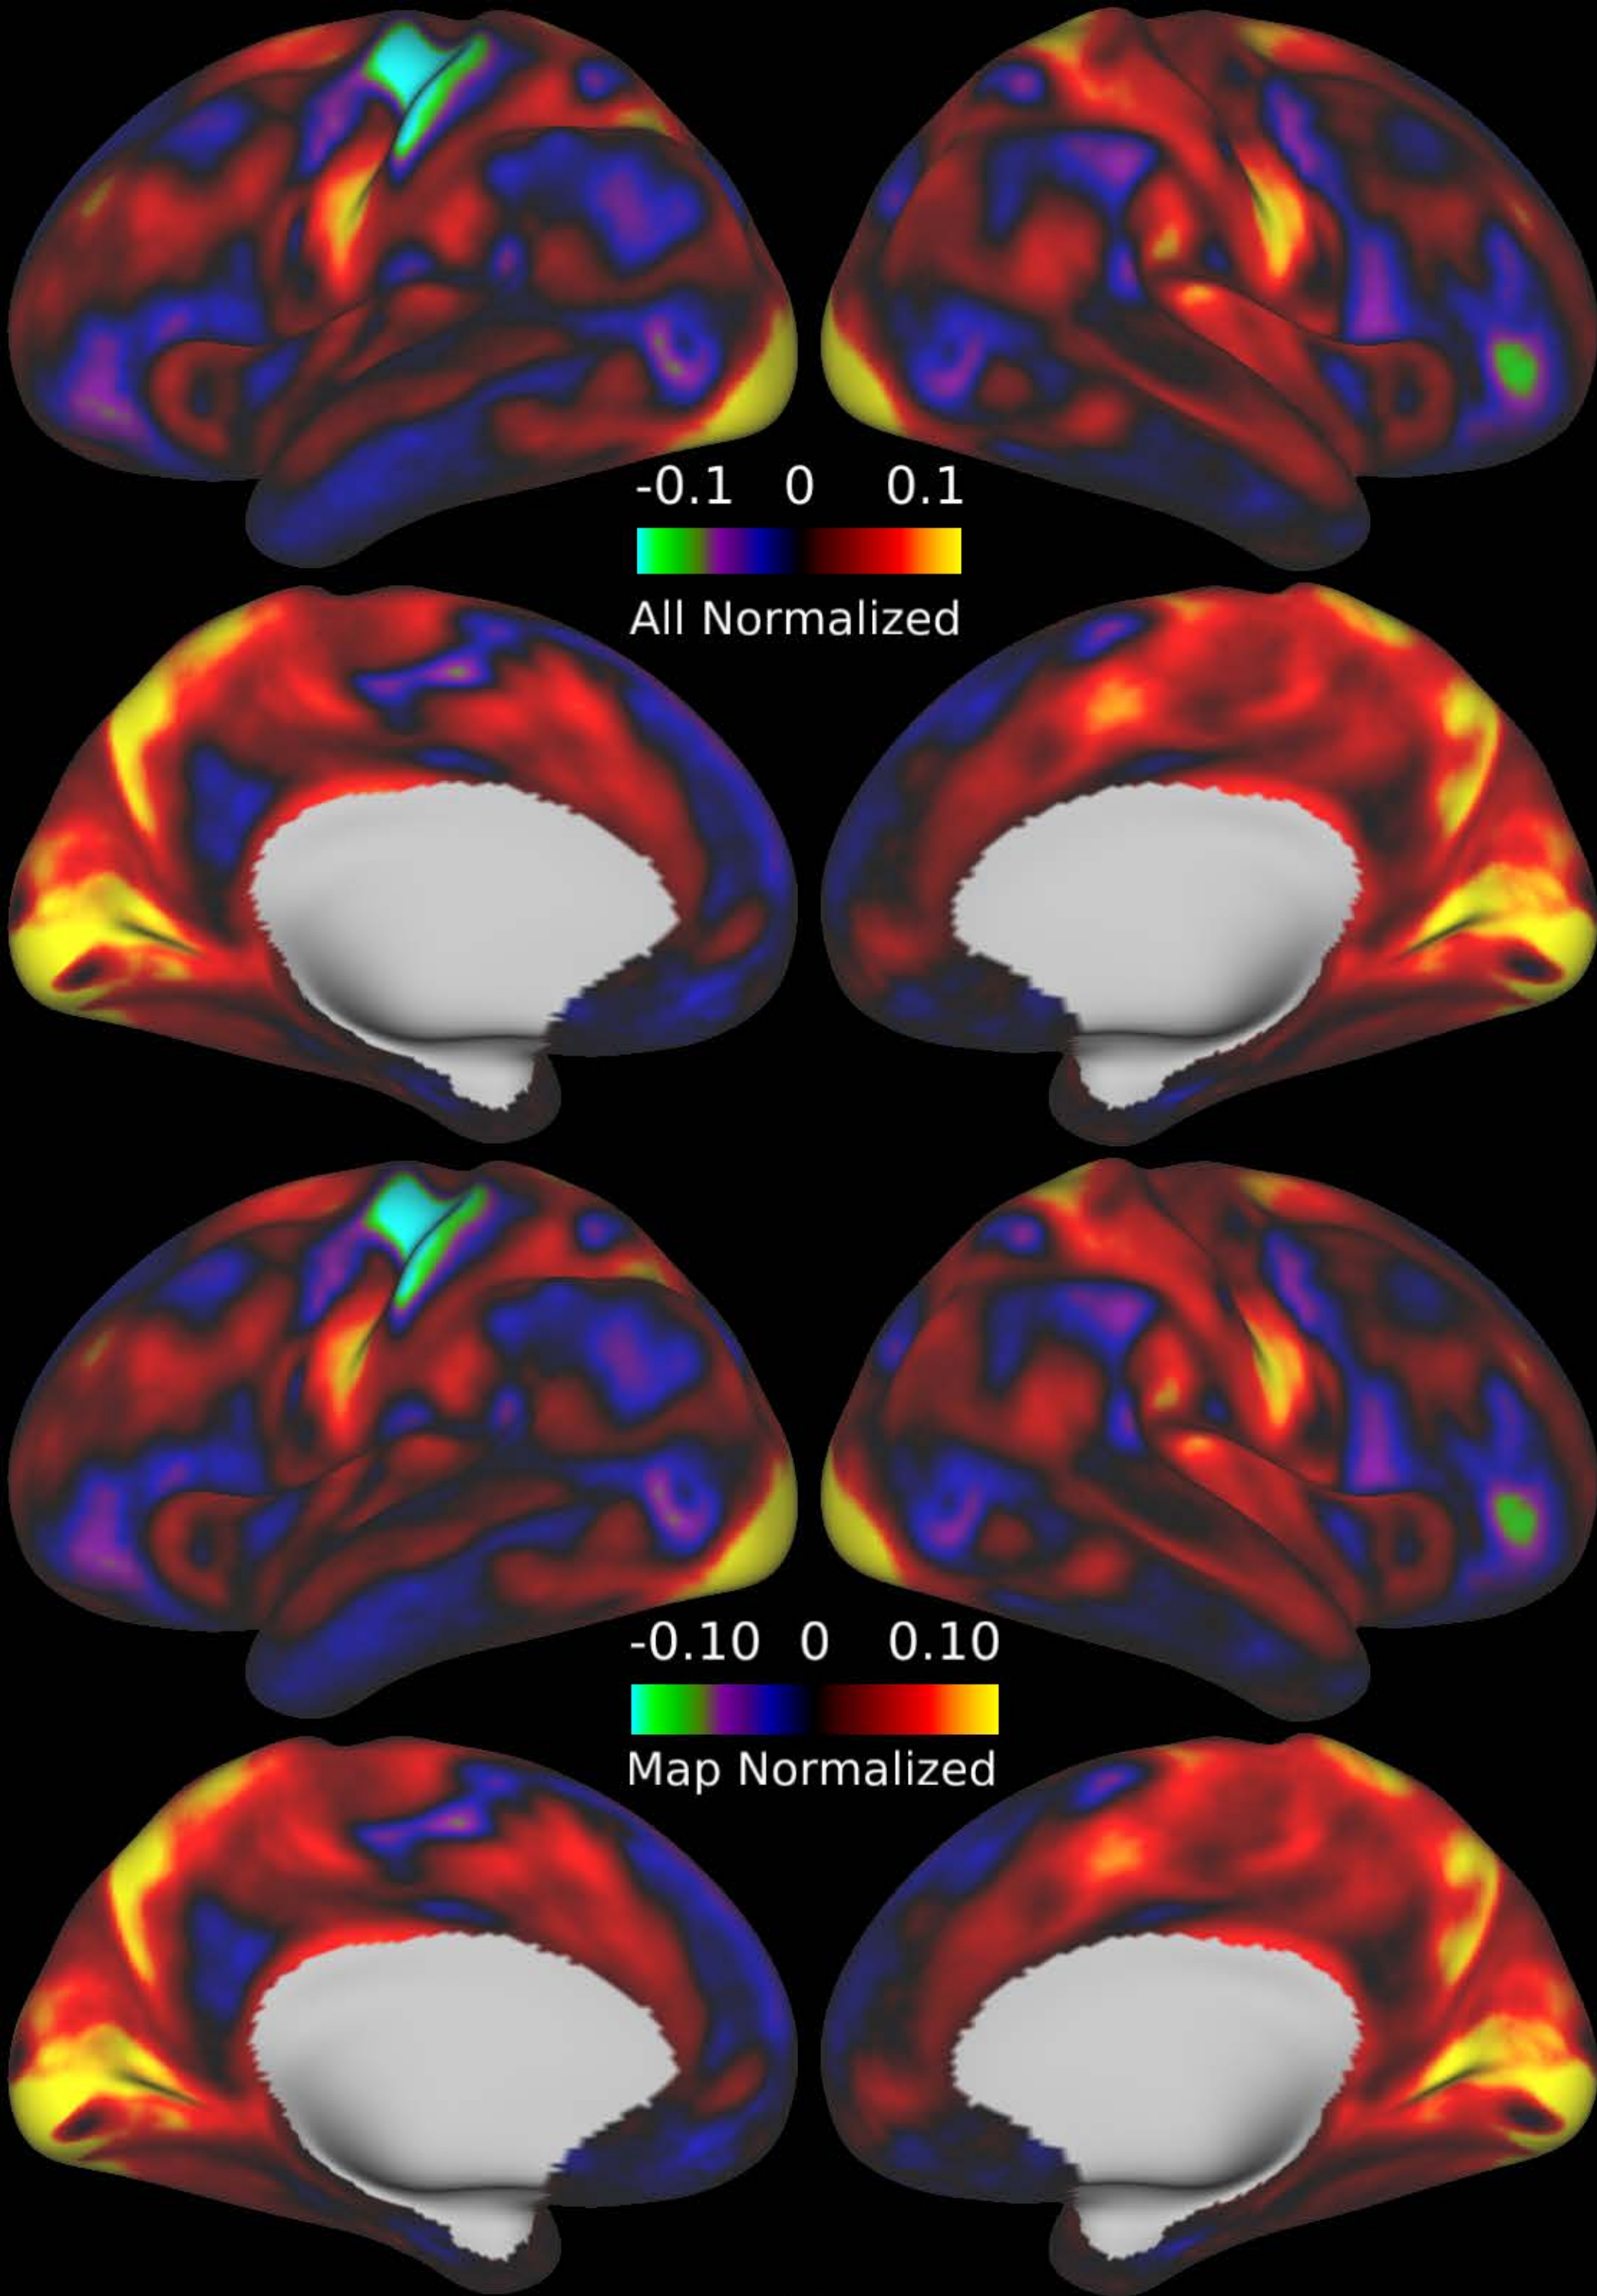

Hertz

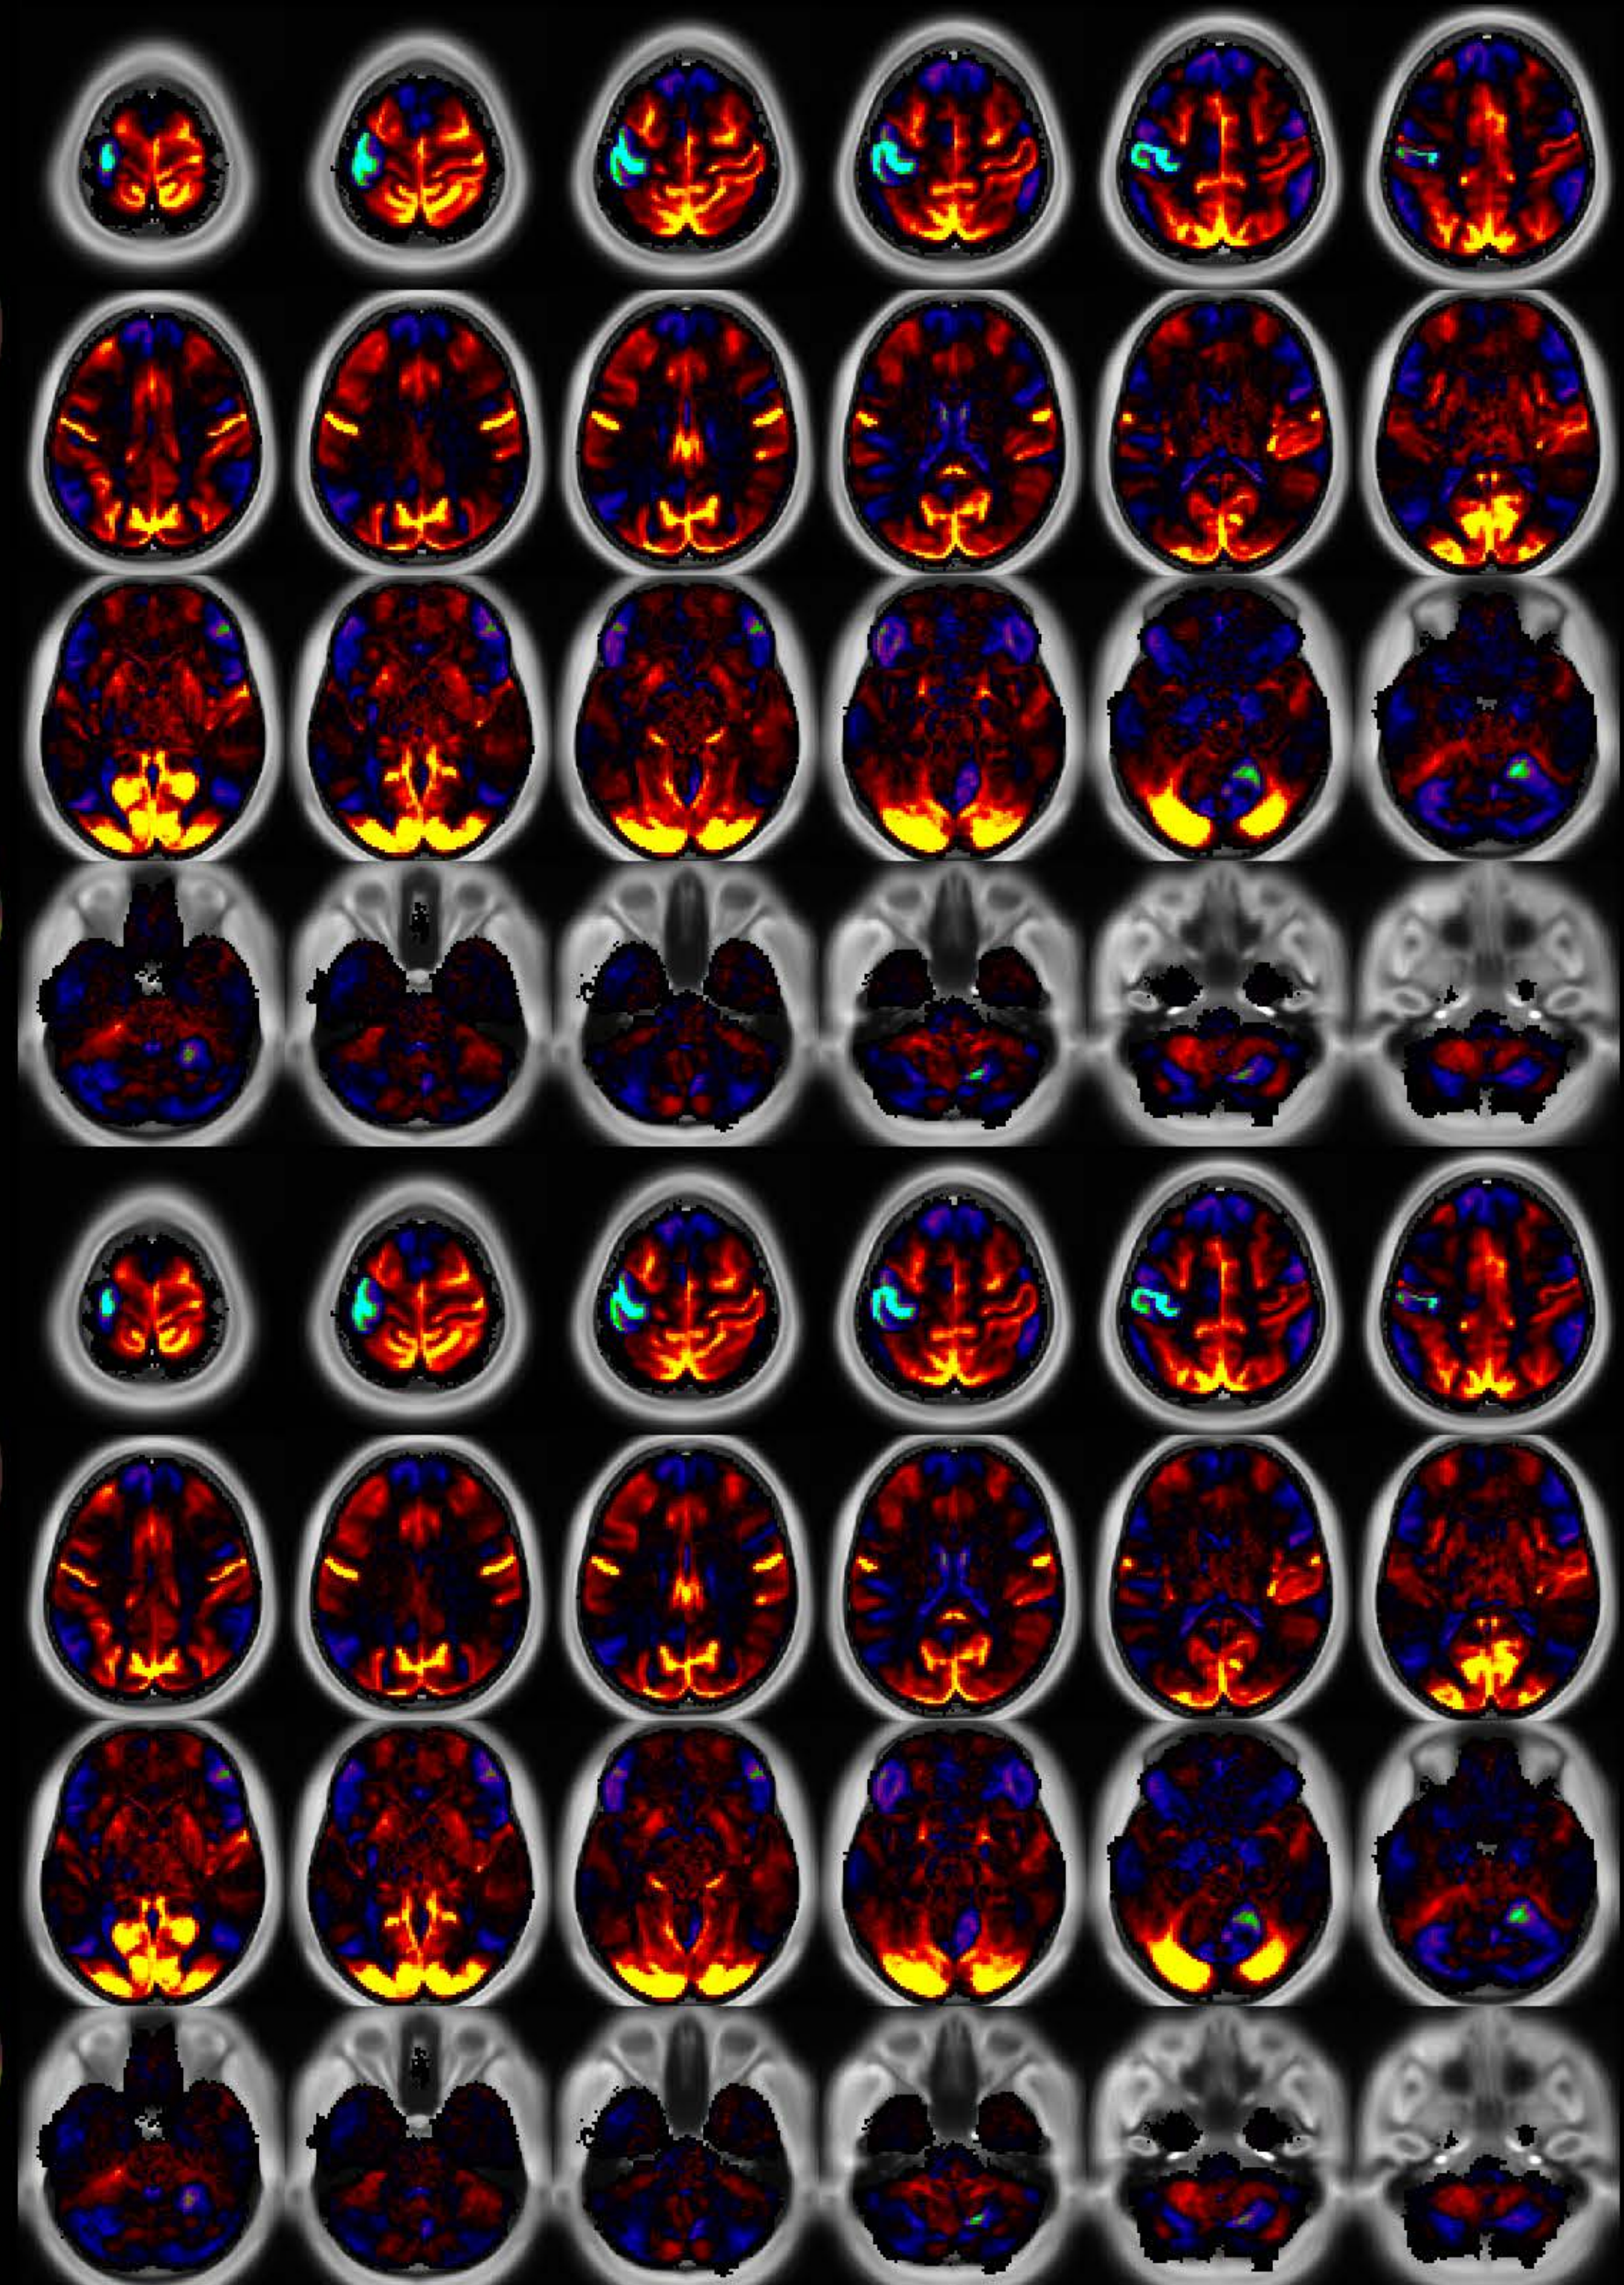

Seconds

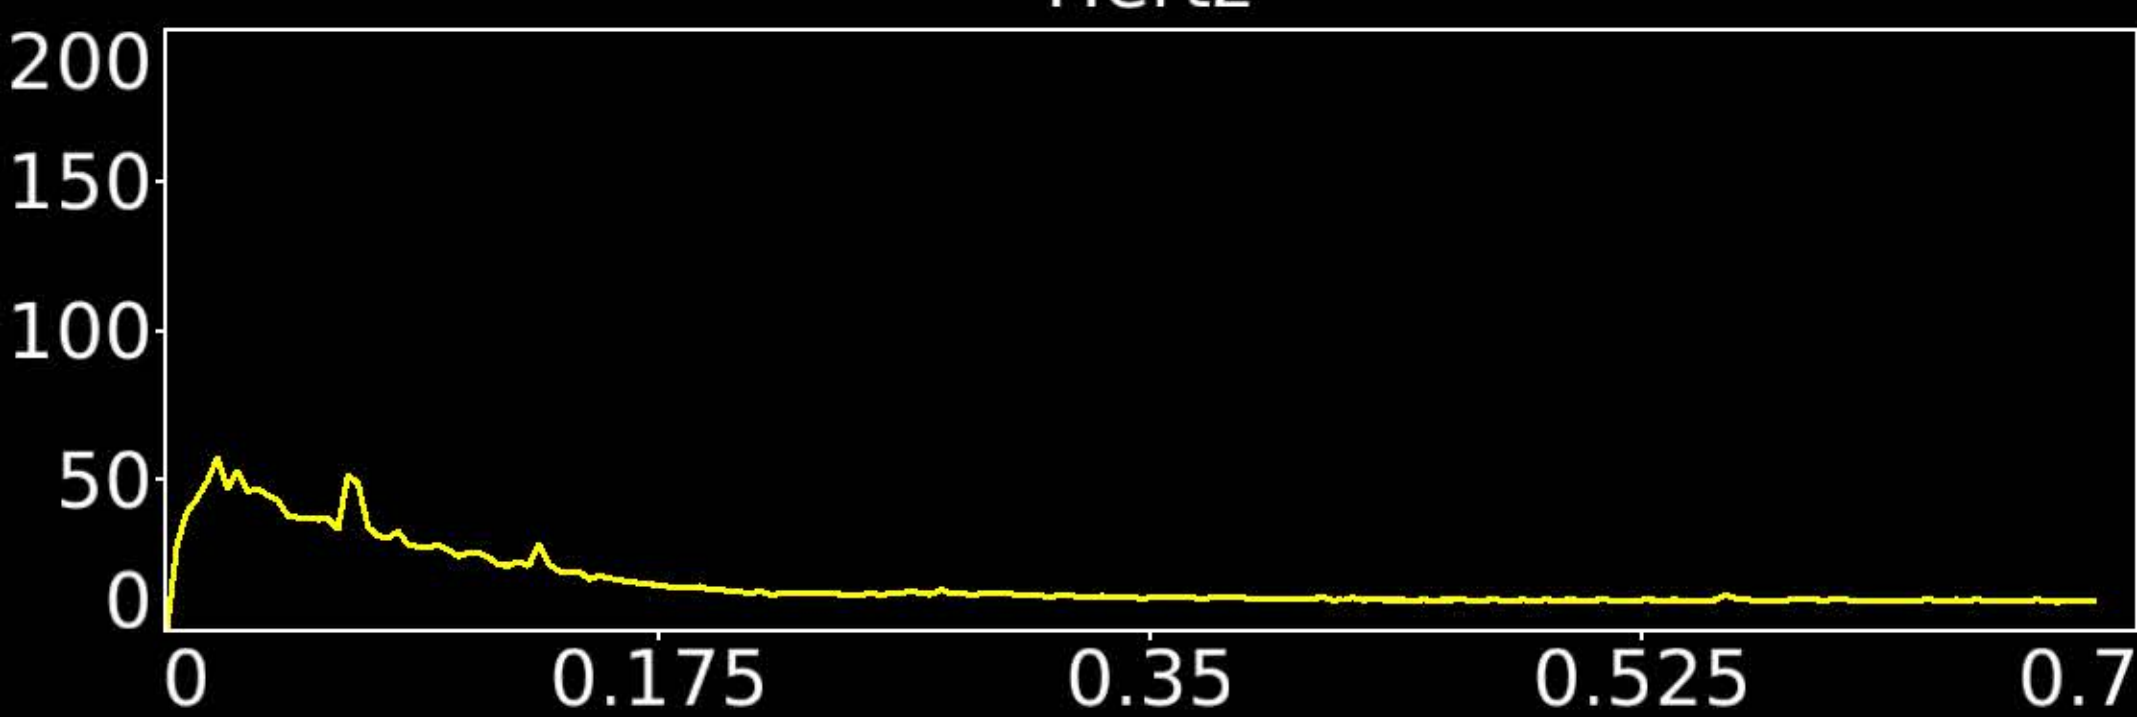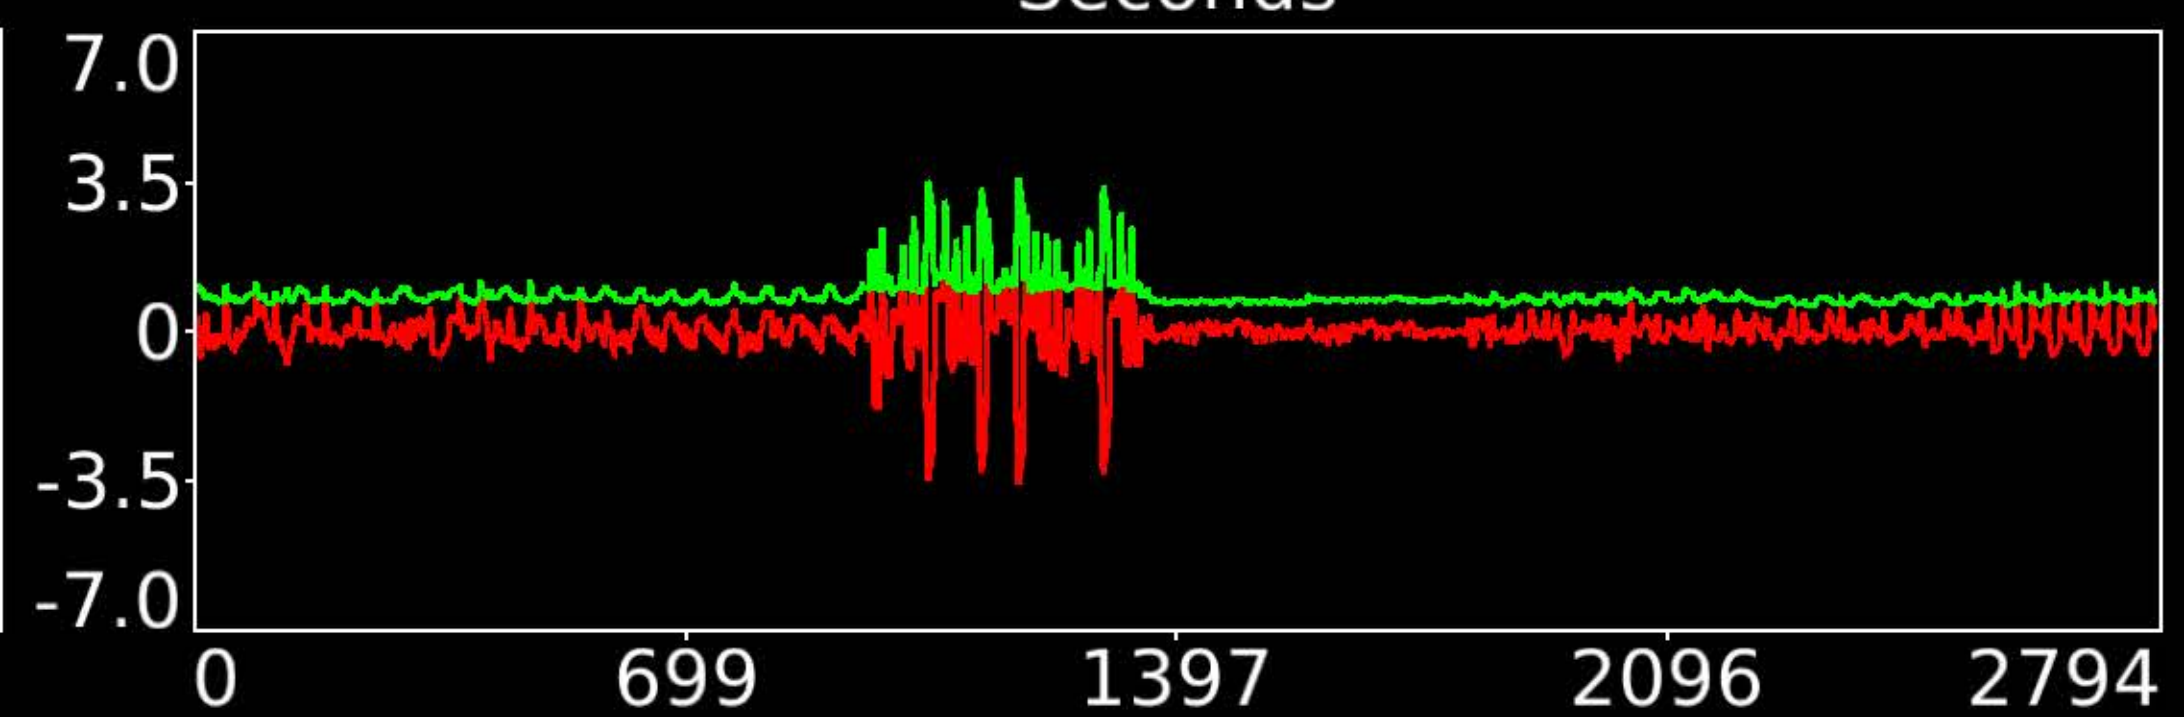

|                           |                            |                            |  |
|---------------------------|----------------------------|----------------------------|--|
| Number & Class: 28 Signal |                            | Name: Motor Task Unknown   |  |
| RVT Correlated: No        | DVARS Dip Associated: No   | Cross-Subject Variable: No |  |
| Single Subject: No        | % Variance Explained: 1.36 | Globality Index: 1.16      |  |
| Rest Component: No        | Taskr Component: No        | Task Modulated: Motor      |  |

Rationale: Spatial map includes positive and negative patches that are correlated with a specific task design



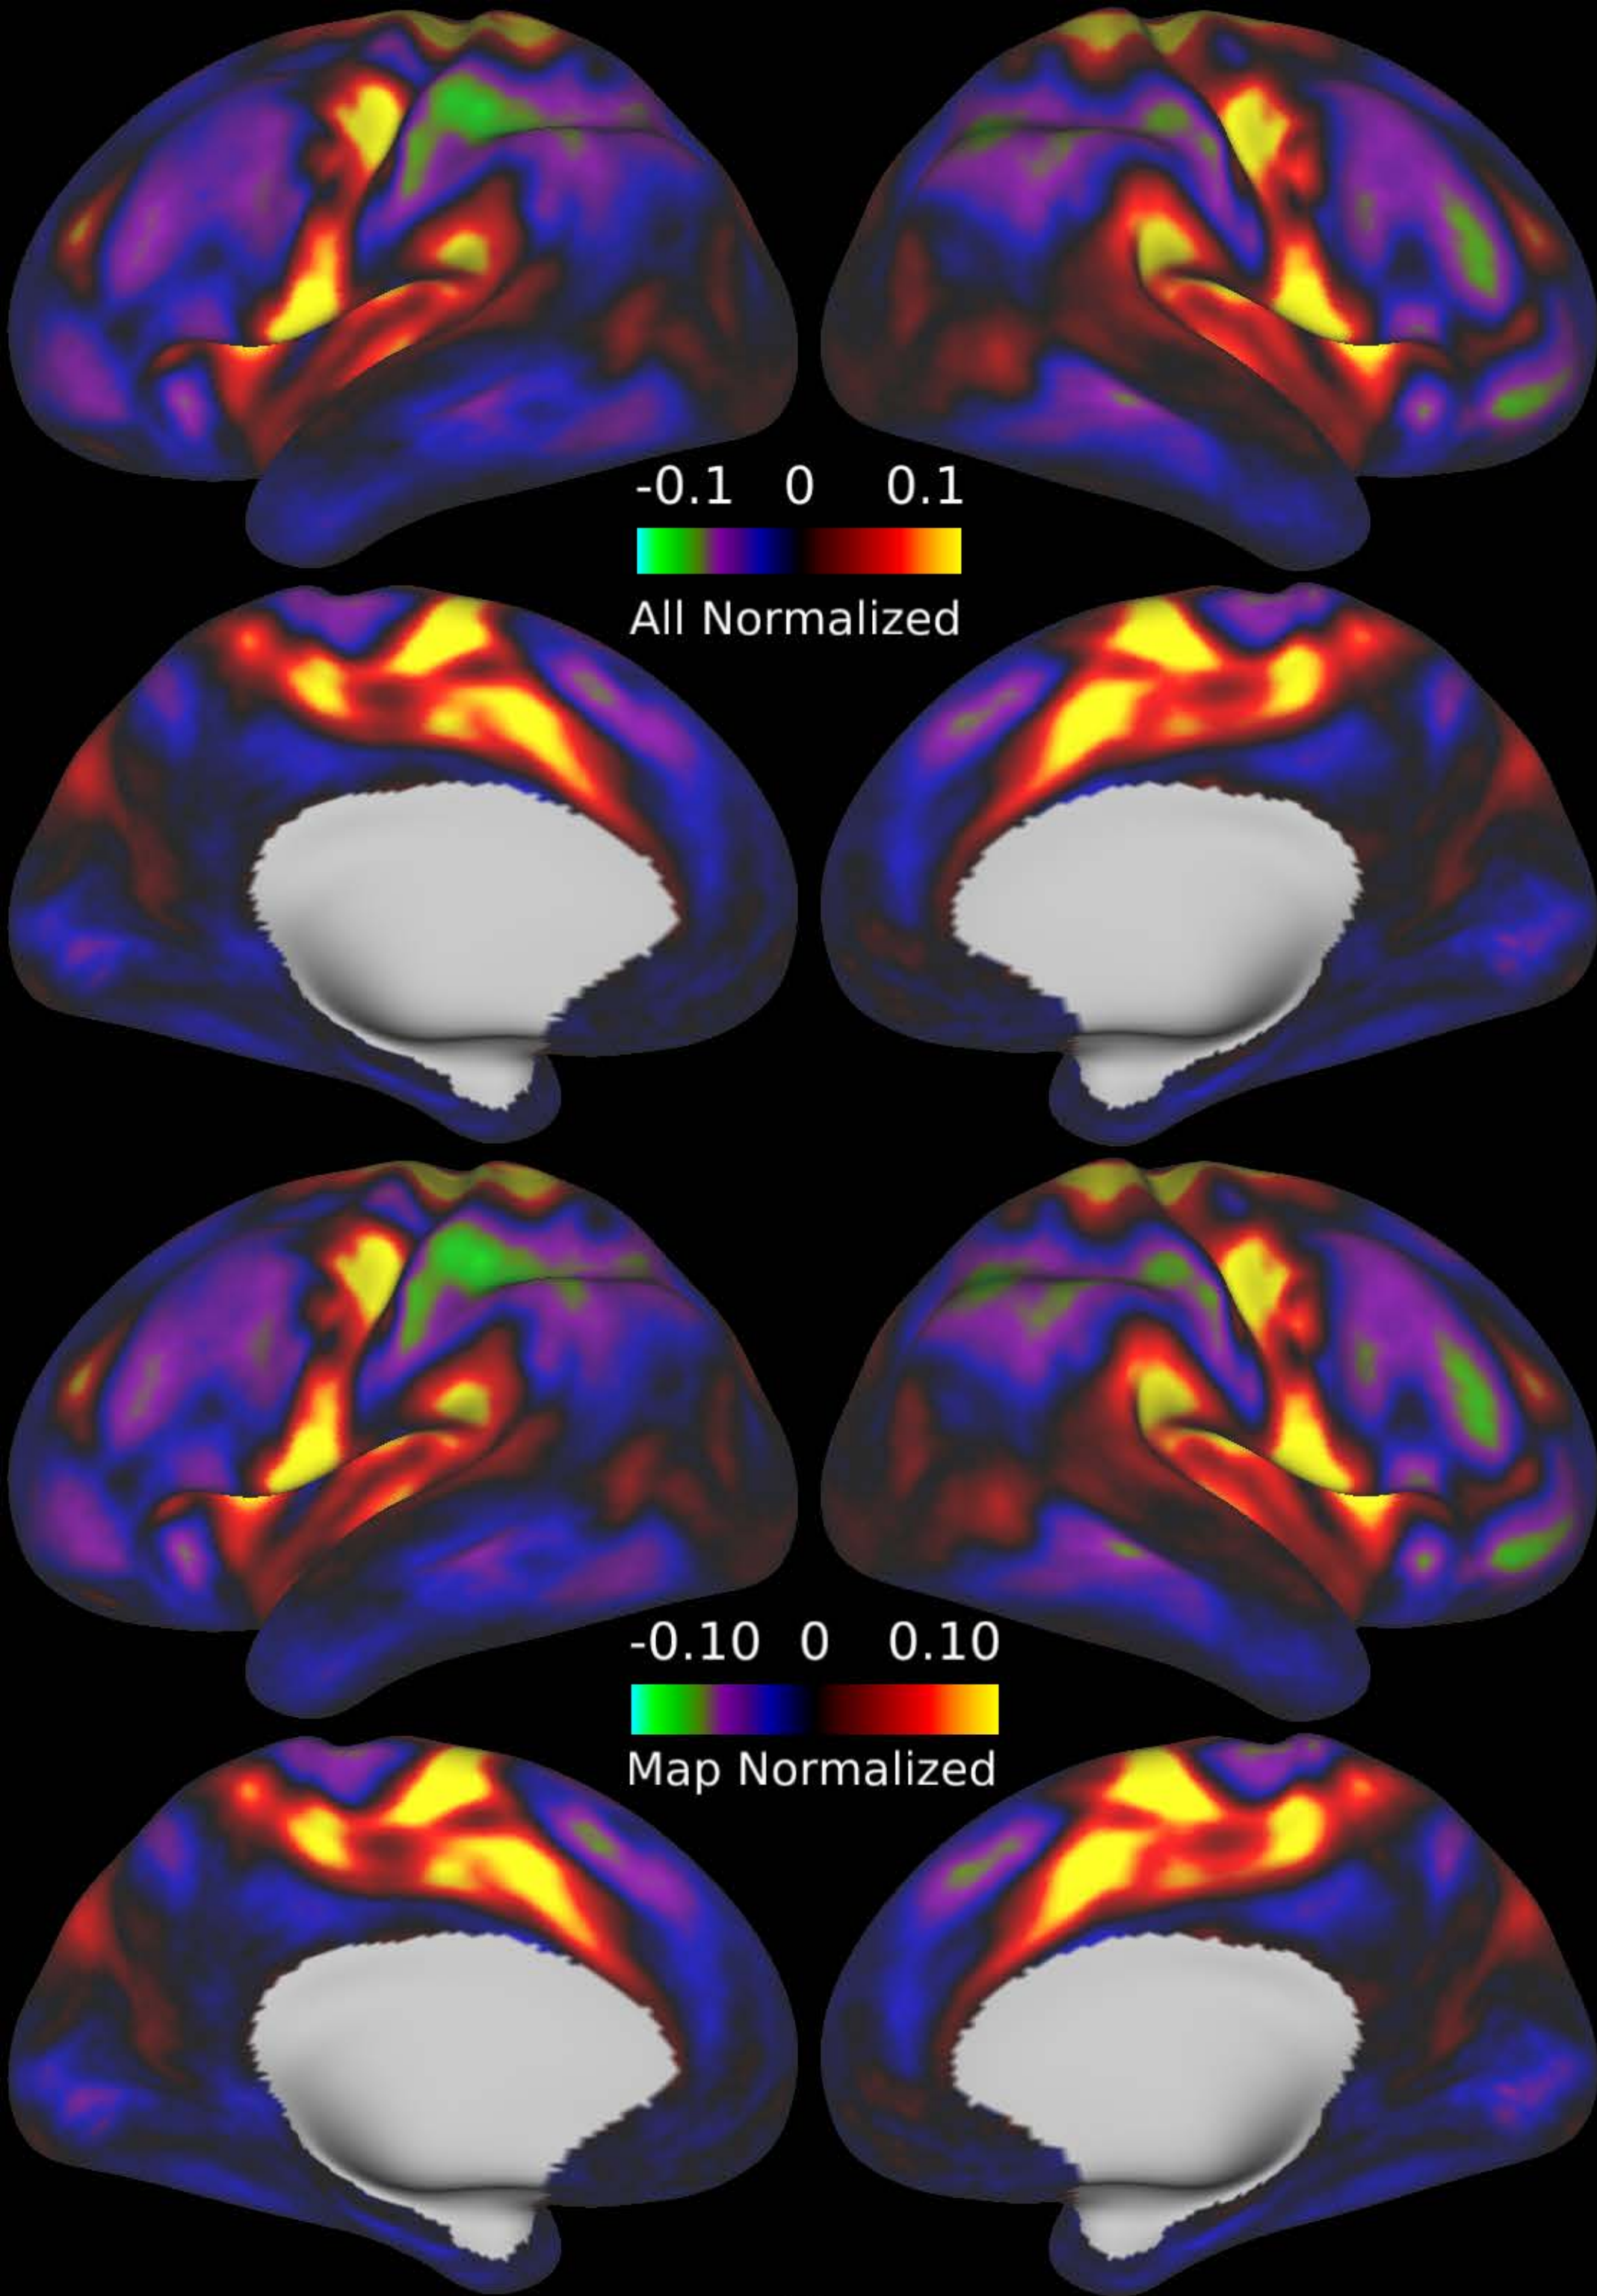

Hertz

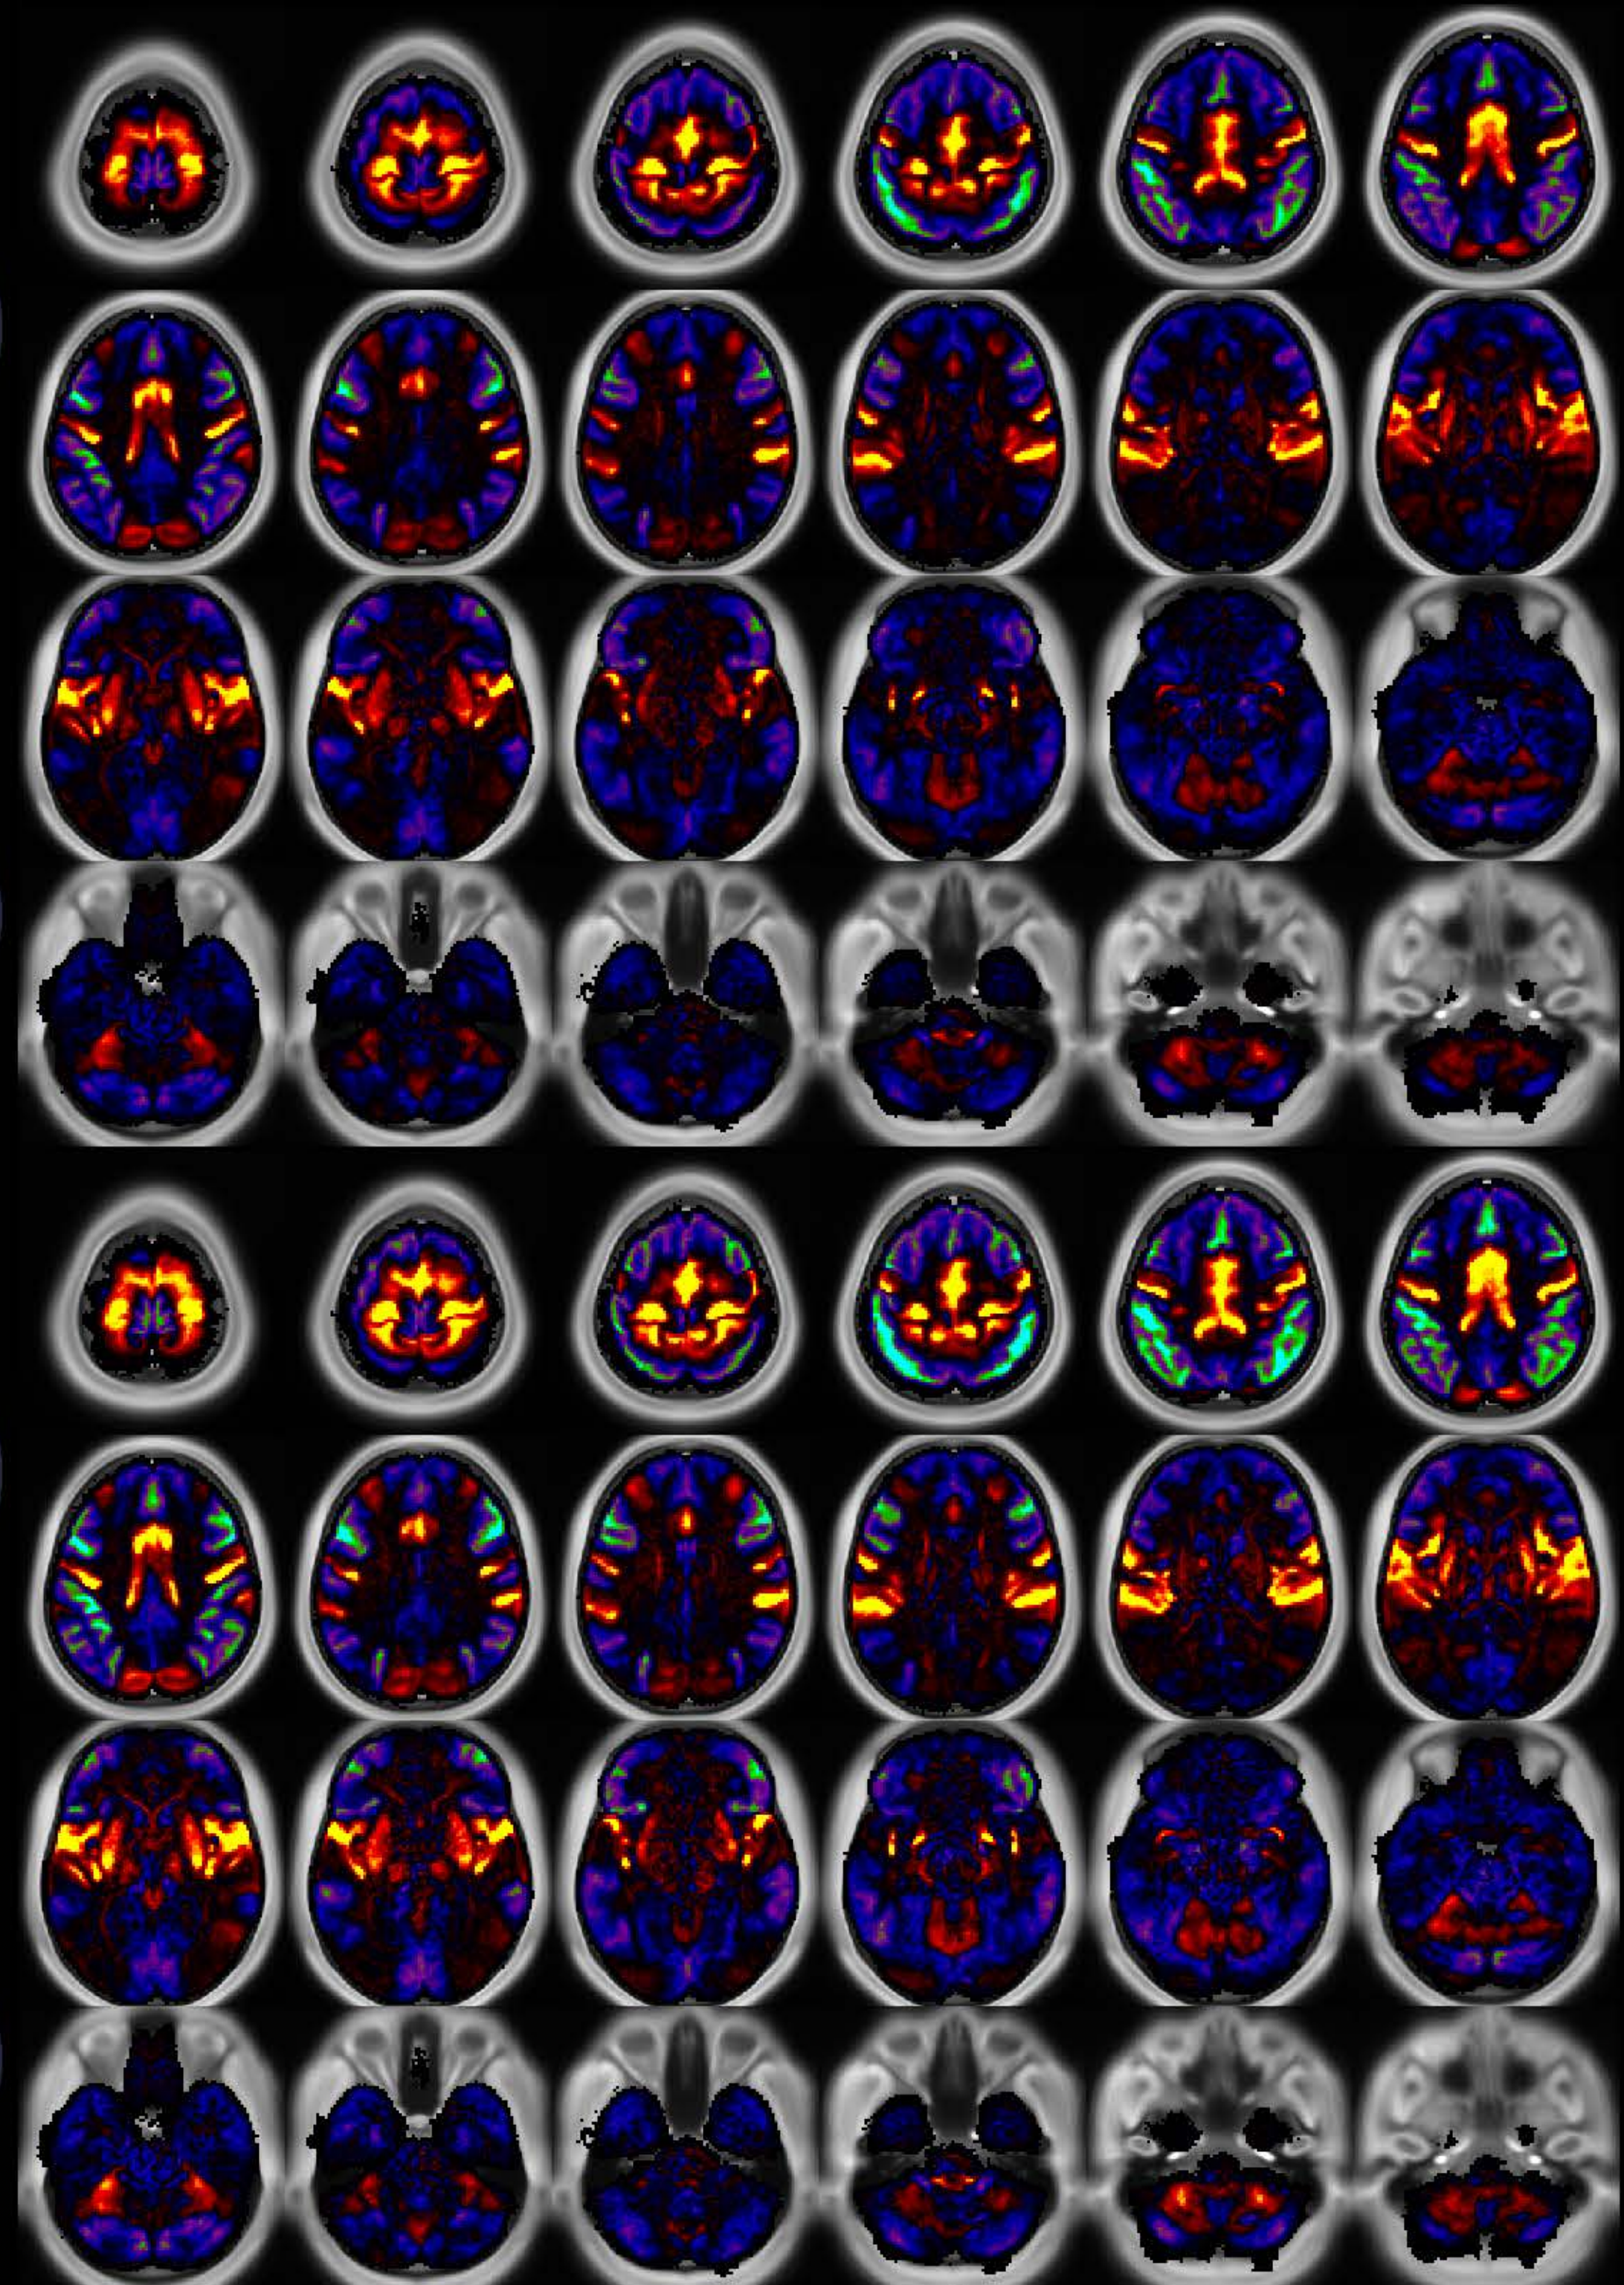

Seconds

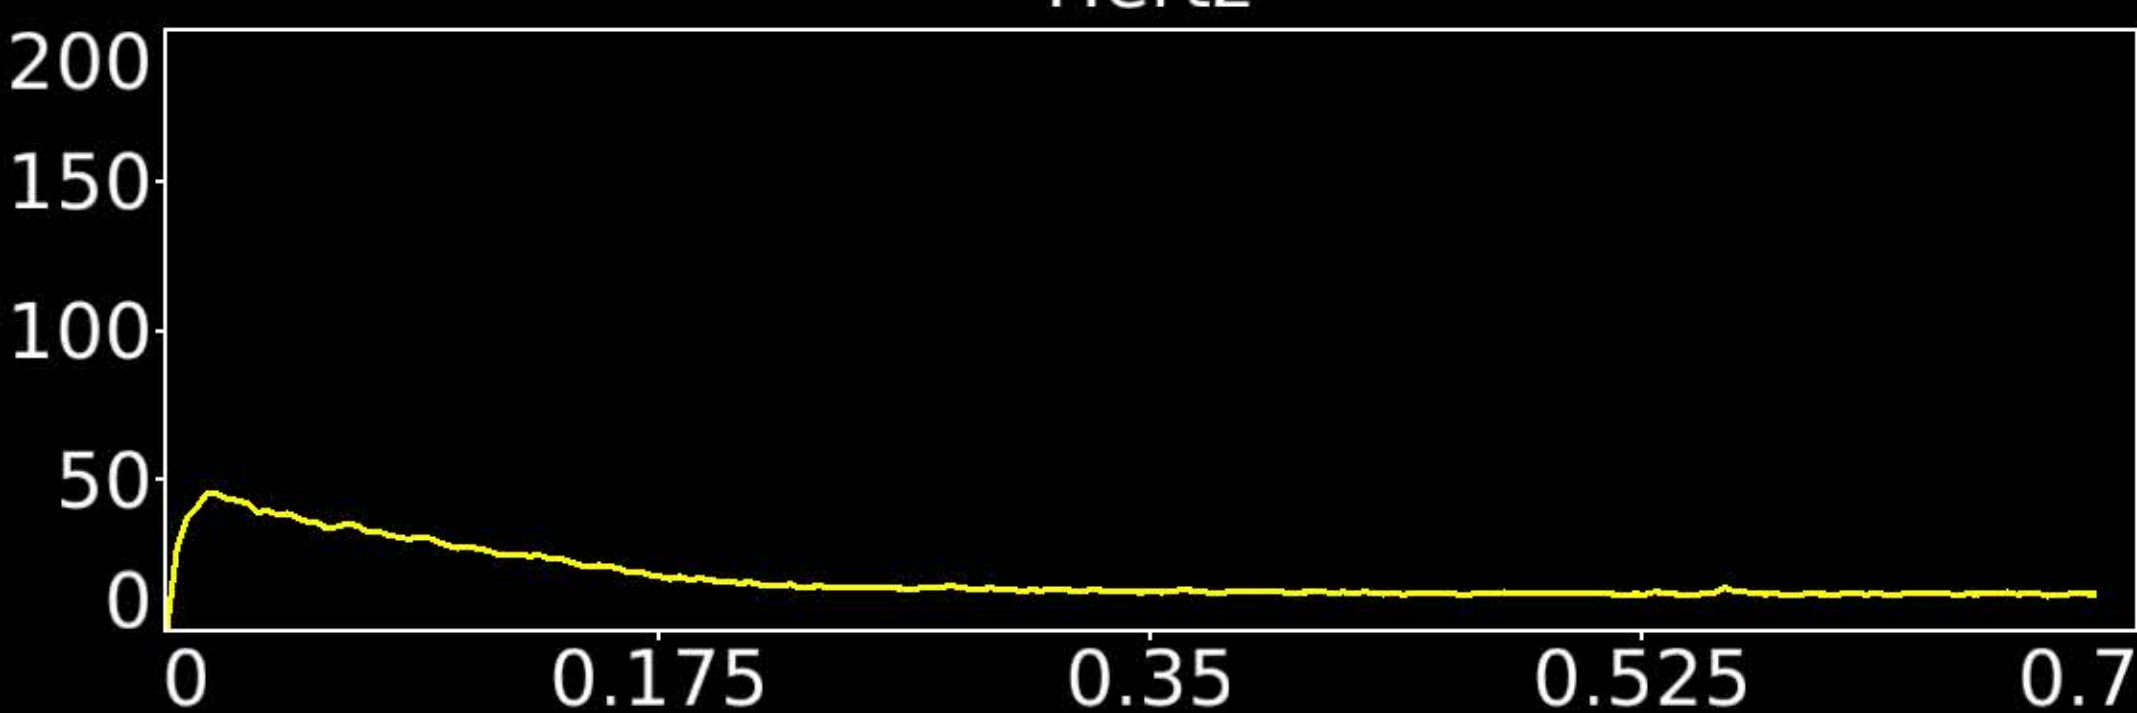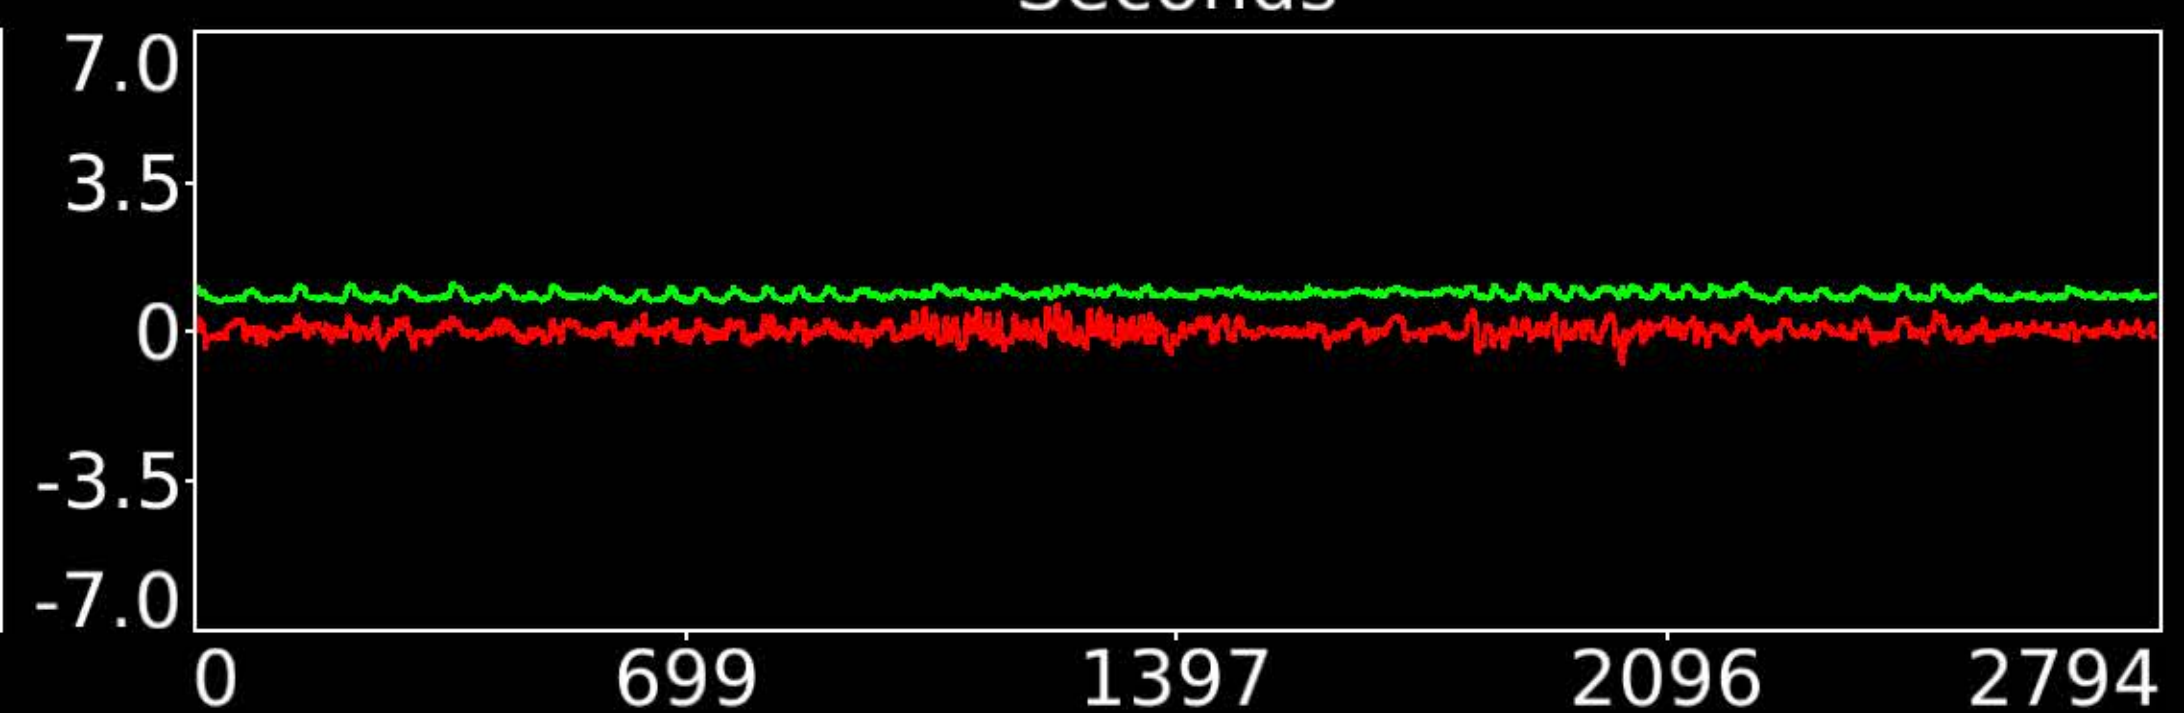

|                           |                            |                                 |  |
|---------------------------|----------------------------|---------------------------------|--|
| Number & Class: 29 Signal |                            | Name: Eye + Trunk Motor Network |  |
| RVT Correlated: No        | DVARS Dip Associated: Yes  | Cross-Subject Variable: No      |  |
| Single Subject: No        | % Variance Explained: 1.28 | Globality Index: 0.55           |  |
| Rest Component: 39        | Taskr Component: 28        | Task Modulated: No              |  |

Rationale: Spatial map includes positive and negative patches that respect known somatotopic sensori-motor organization (Eye and Trunk)



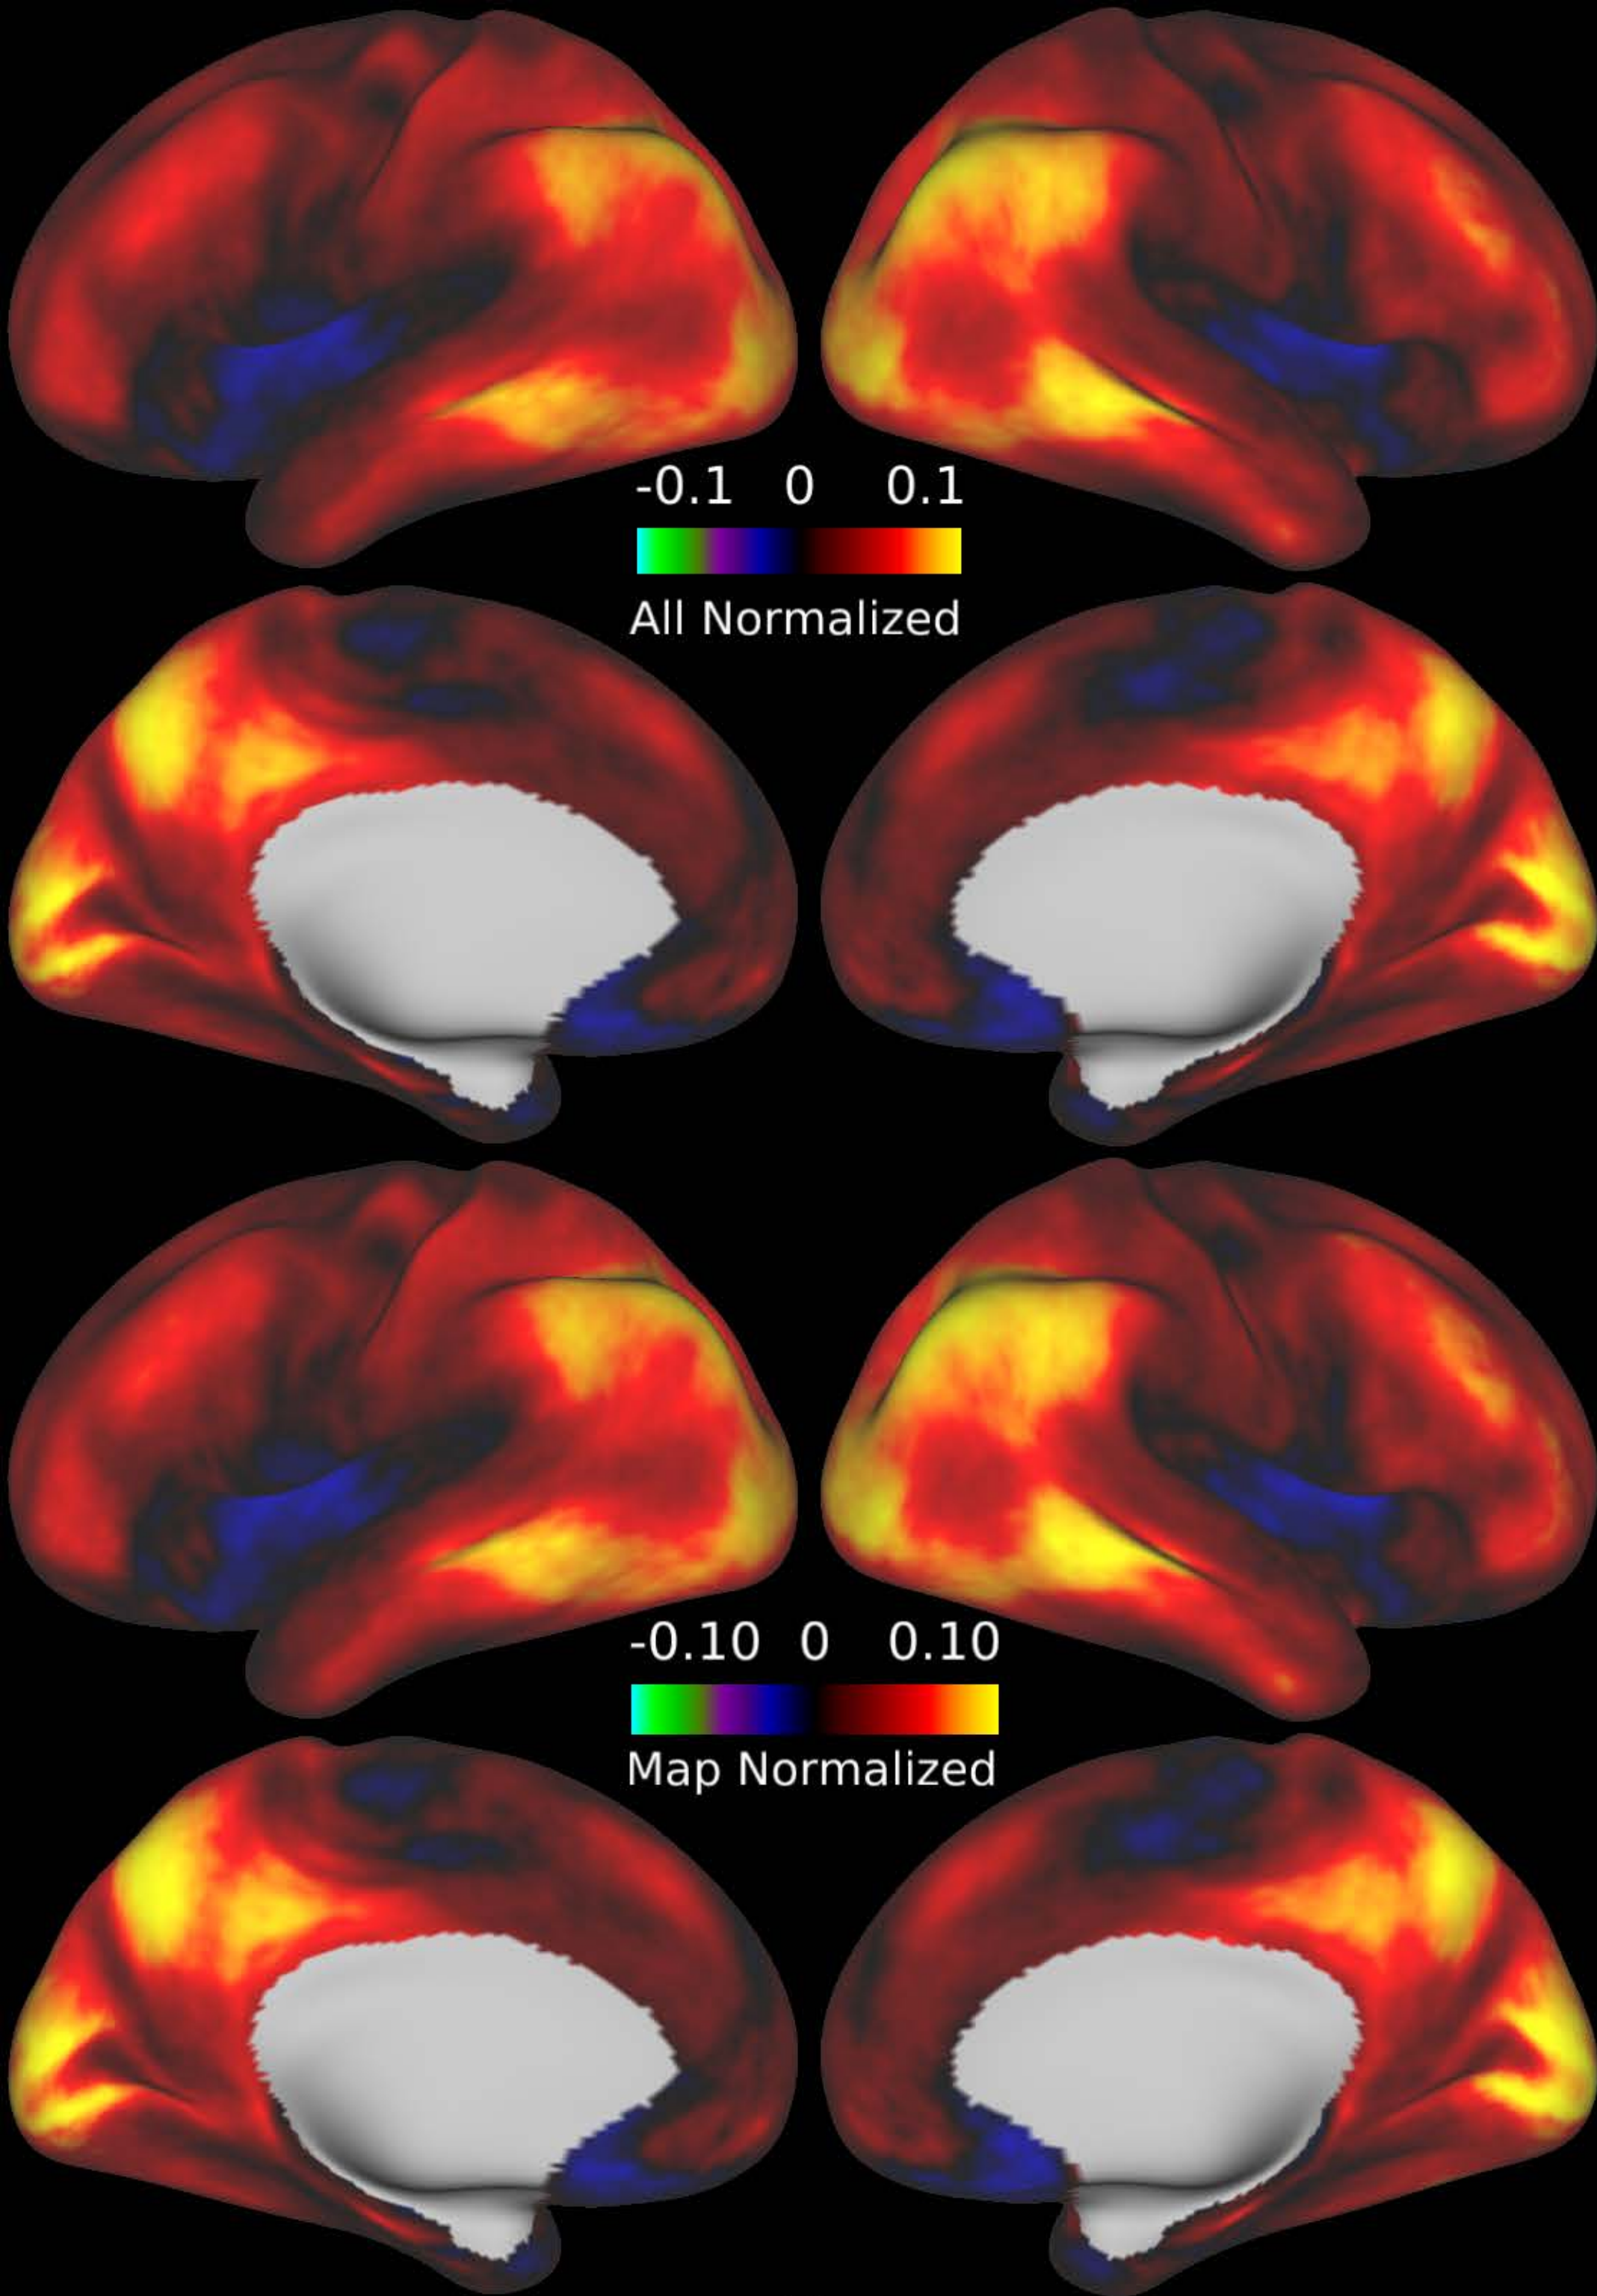

Hertz

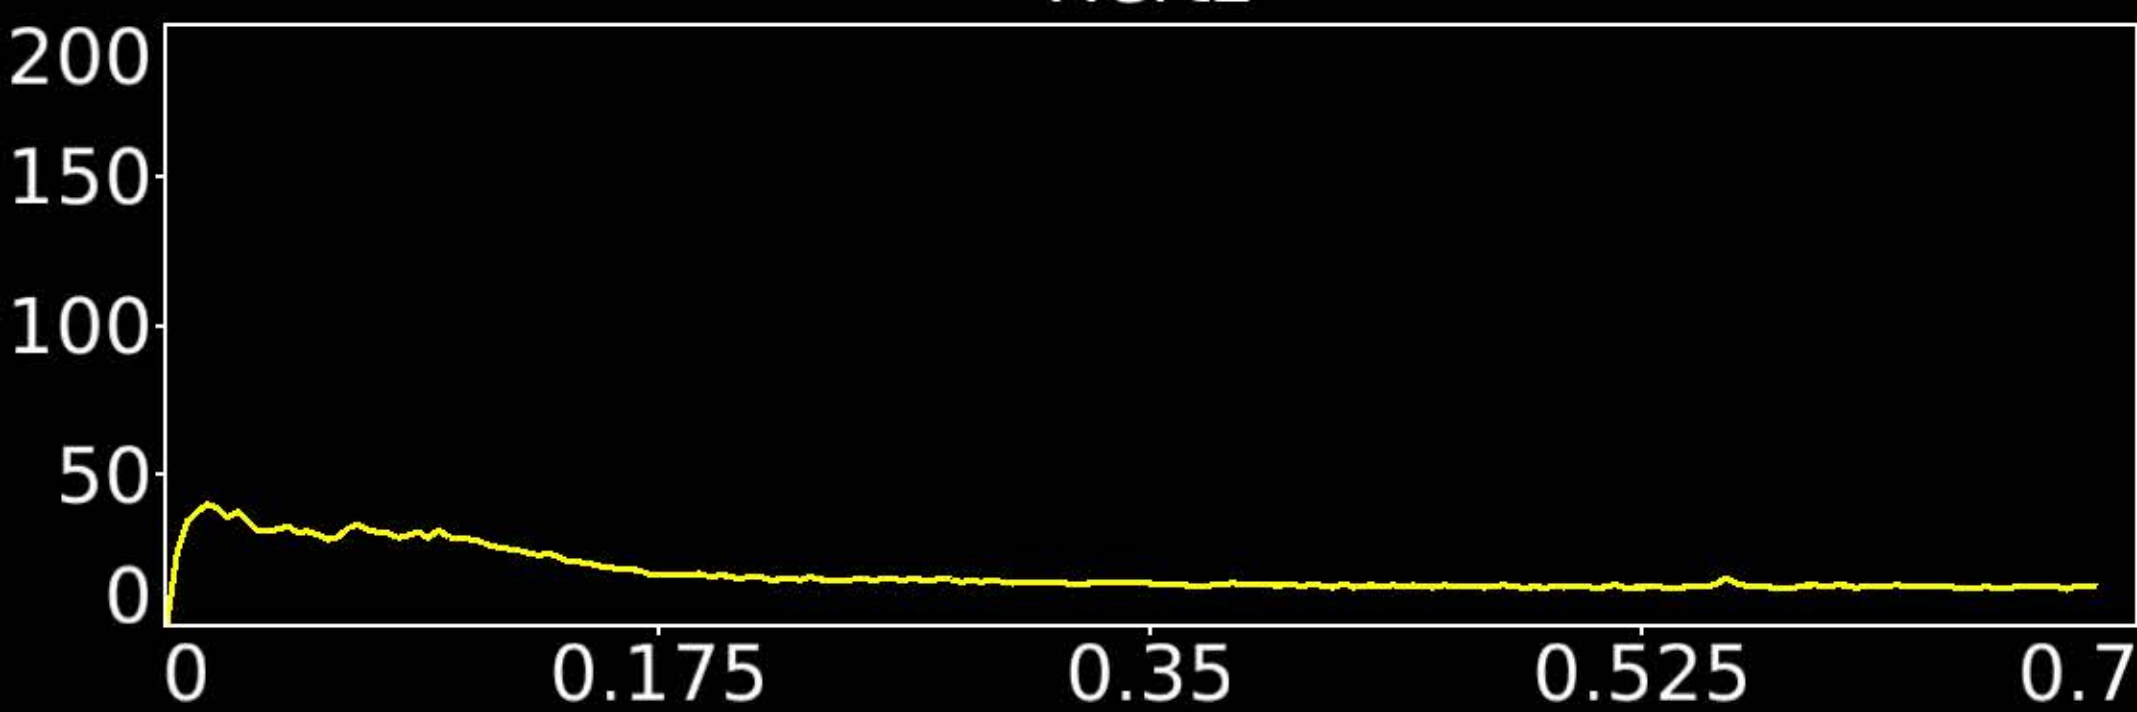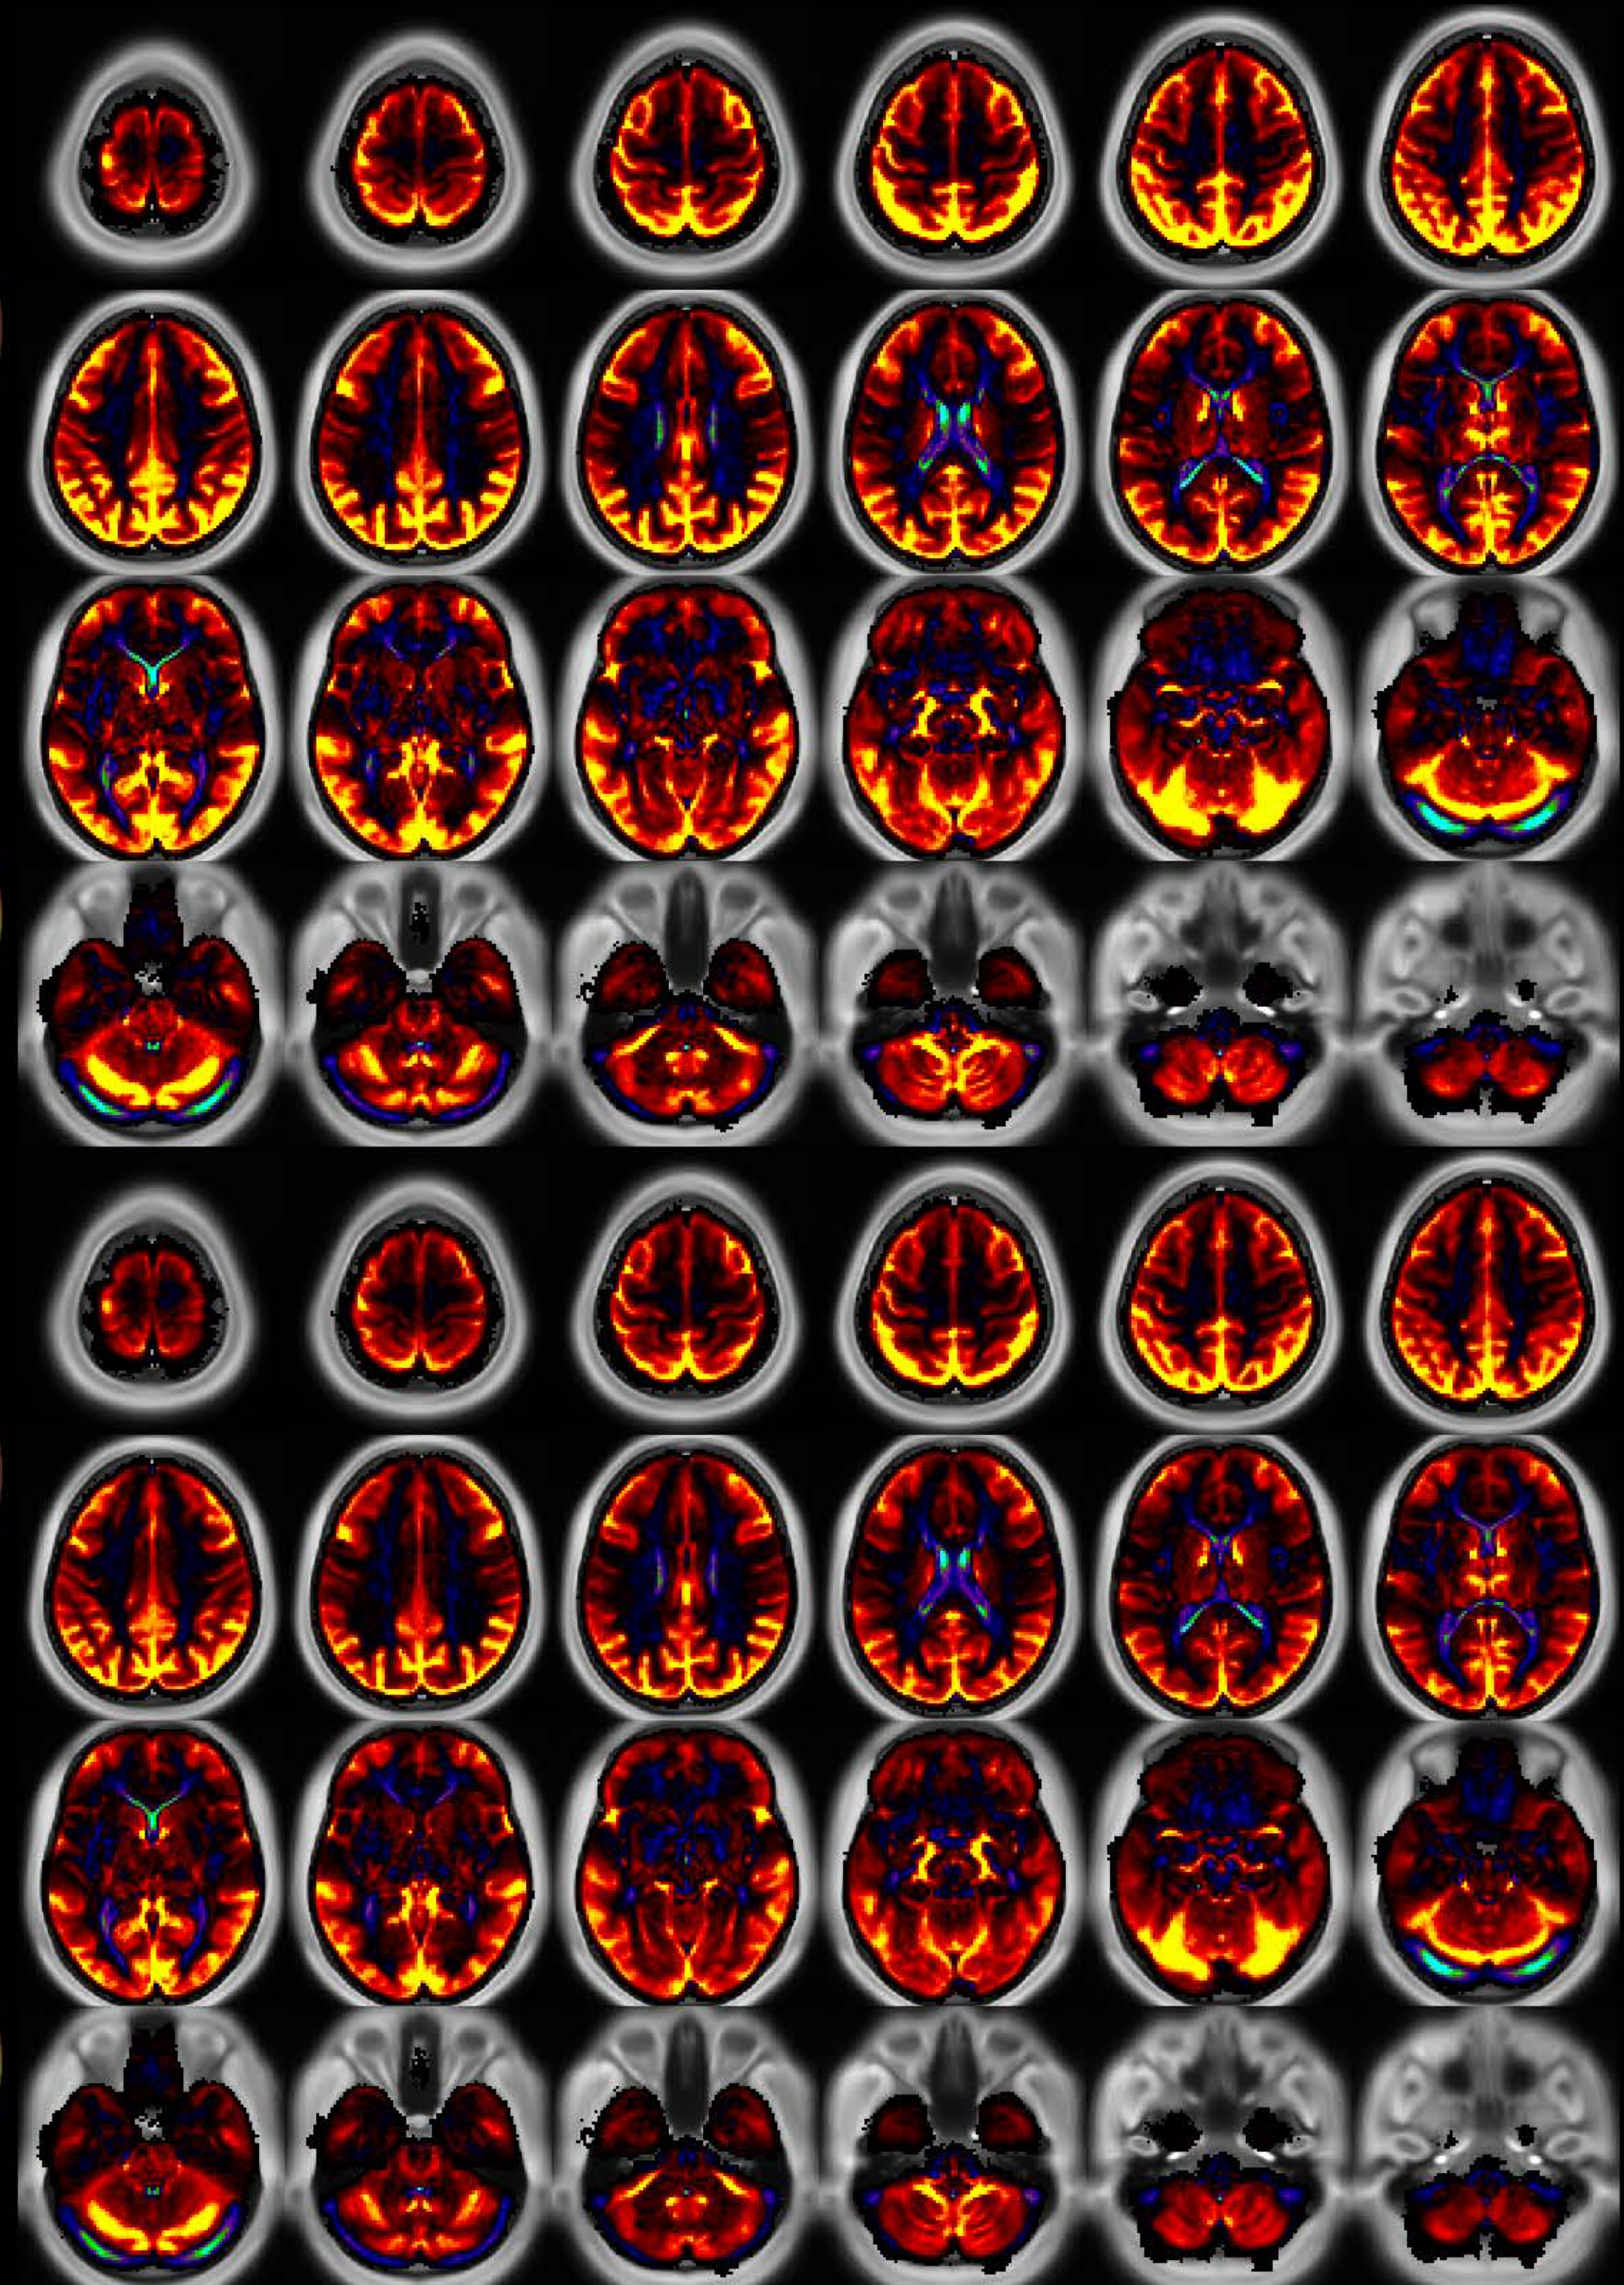

Seconds

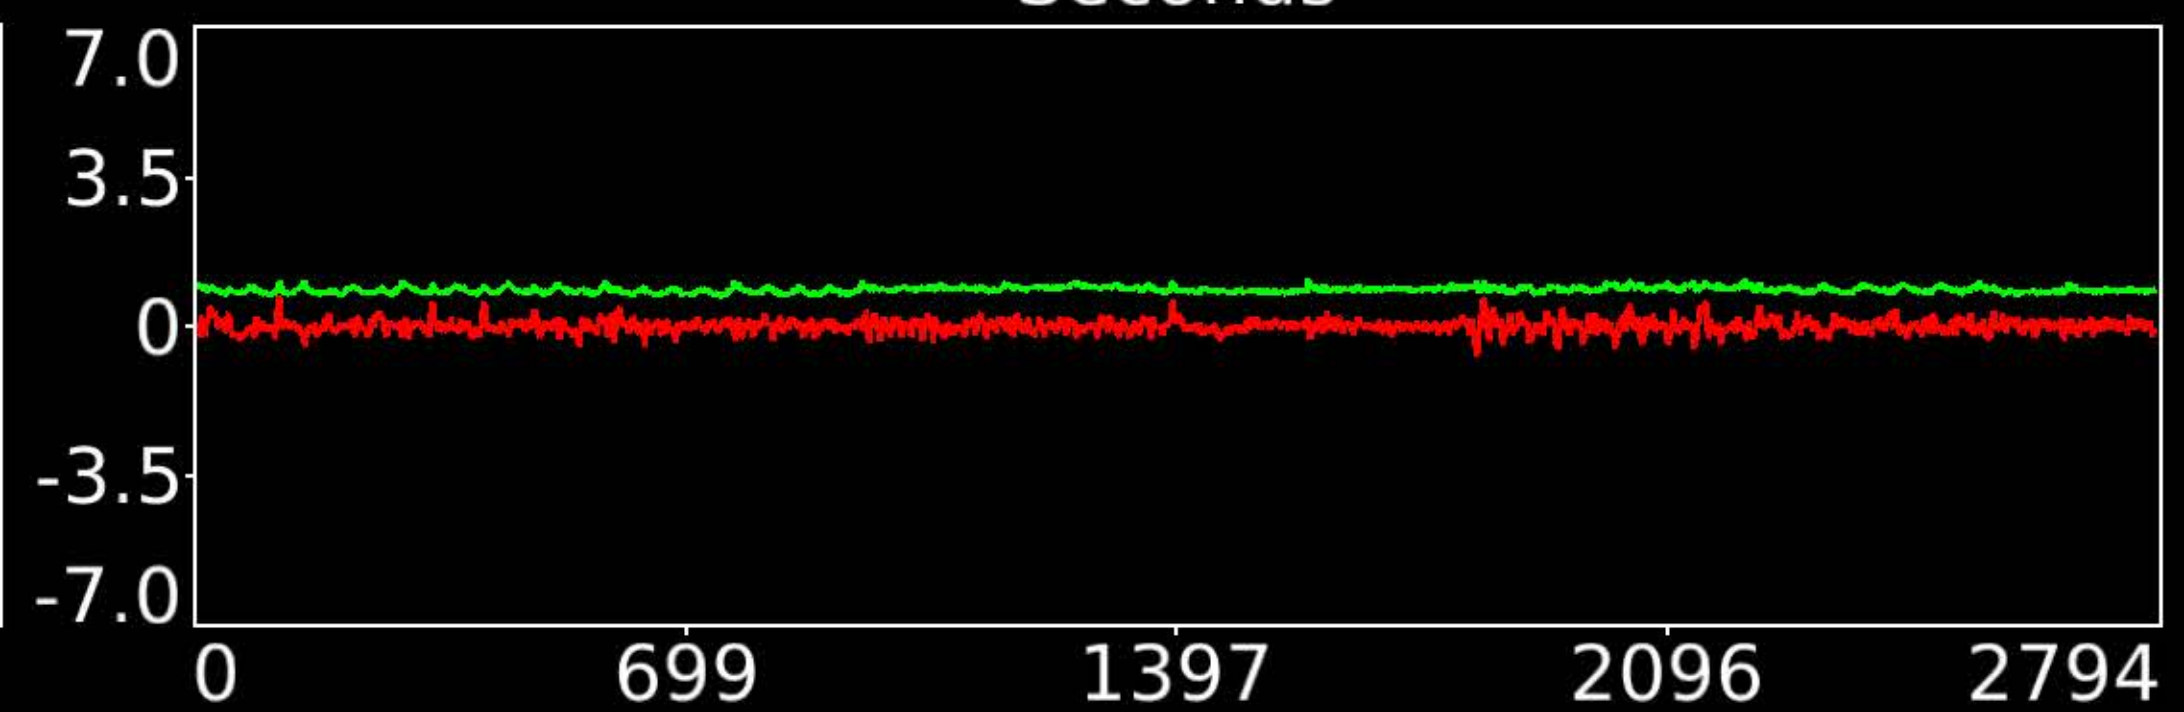

Number & Class: 30 Noise

Name: Global Physiological Noise

RVT Correlated: Yes

DVARS Dip Associated: Yes

Cross-Subject Variable: Yes

Single Subject: Yes

% Variance Explained: 1.24

Globality Index: 2.98

Rest Component: No

Taskr Component: 31

Task Modulated: No

Rationale: Globally positive component that is DVARS dips and RVT correlated and does not reflect known RSNs or areal boundaries



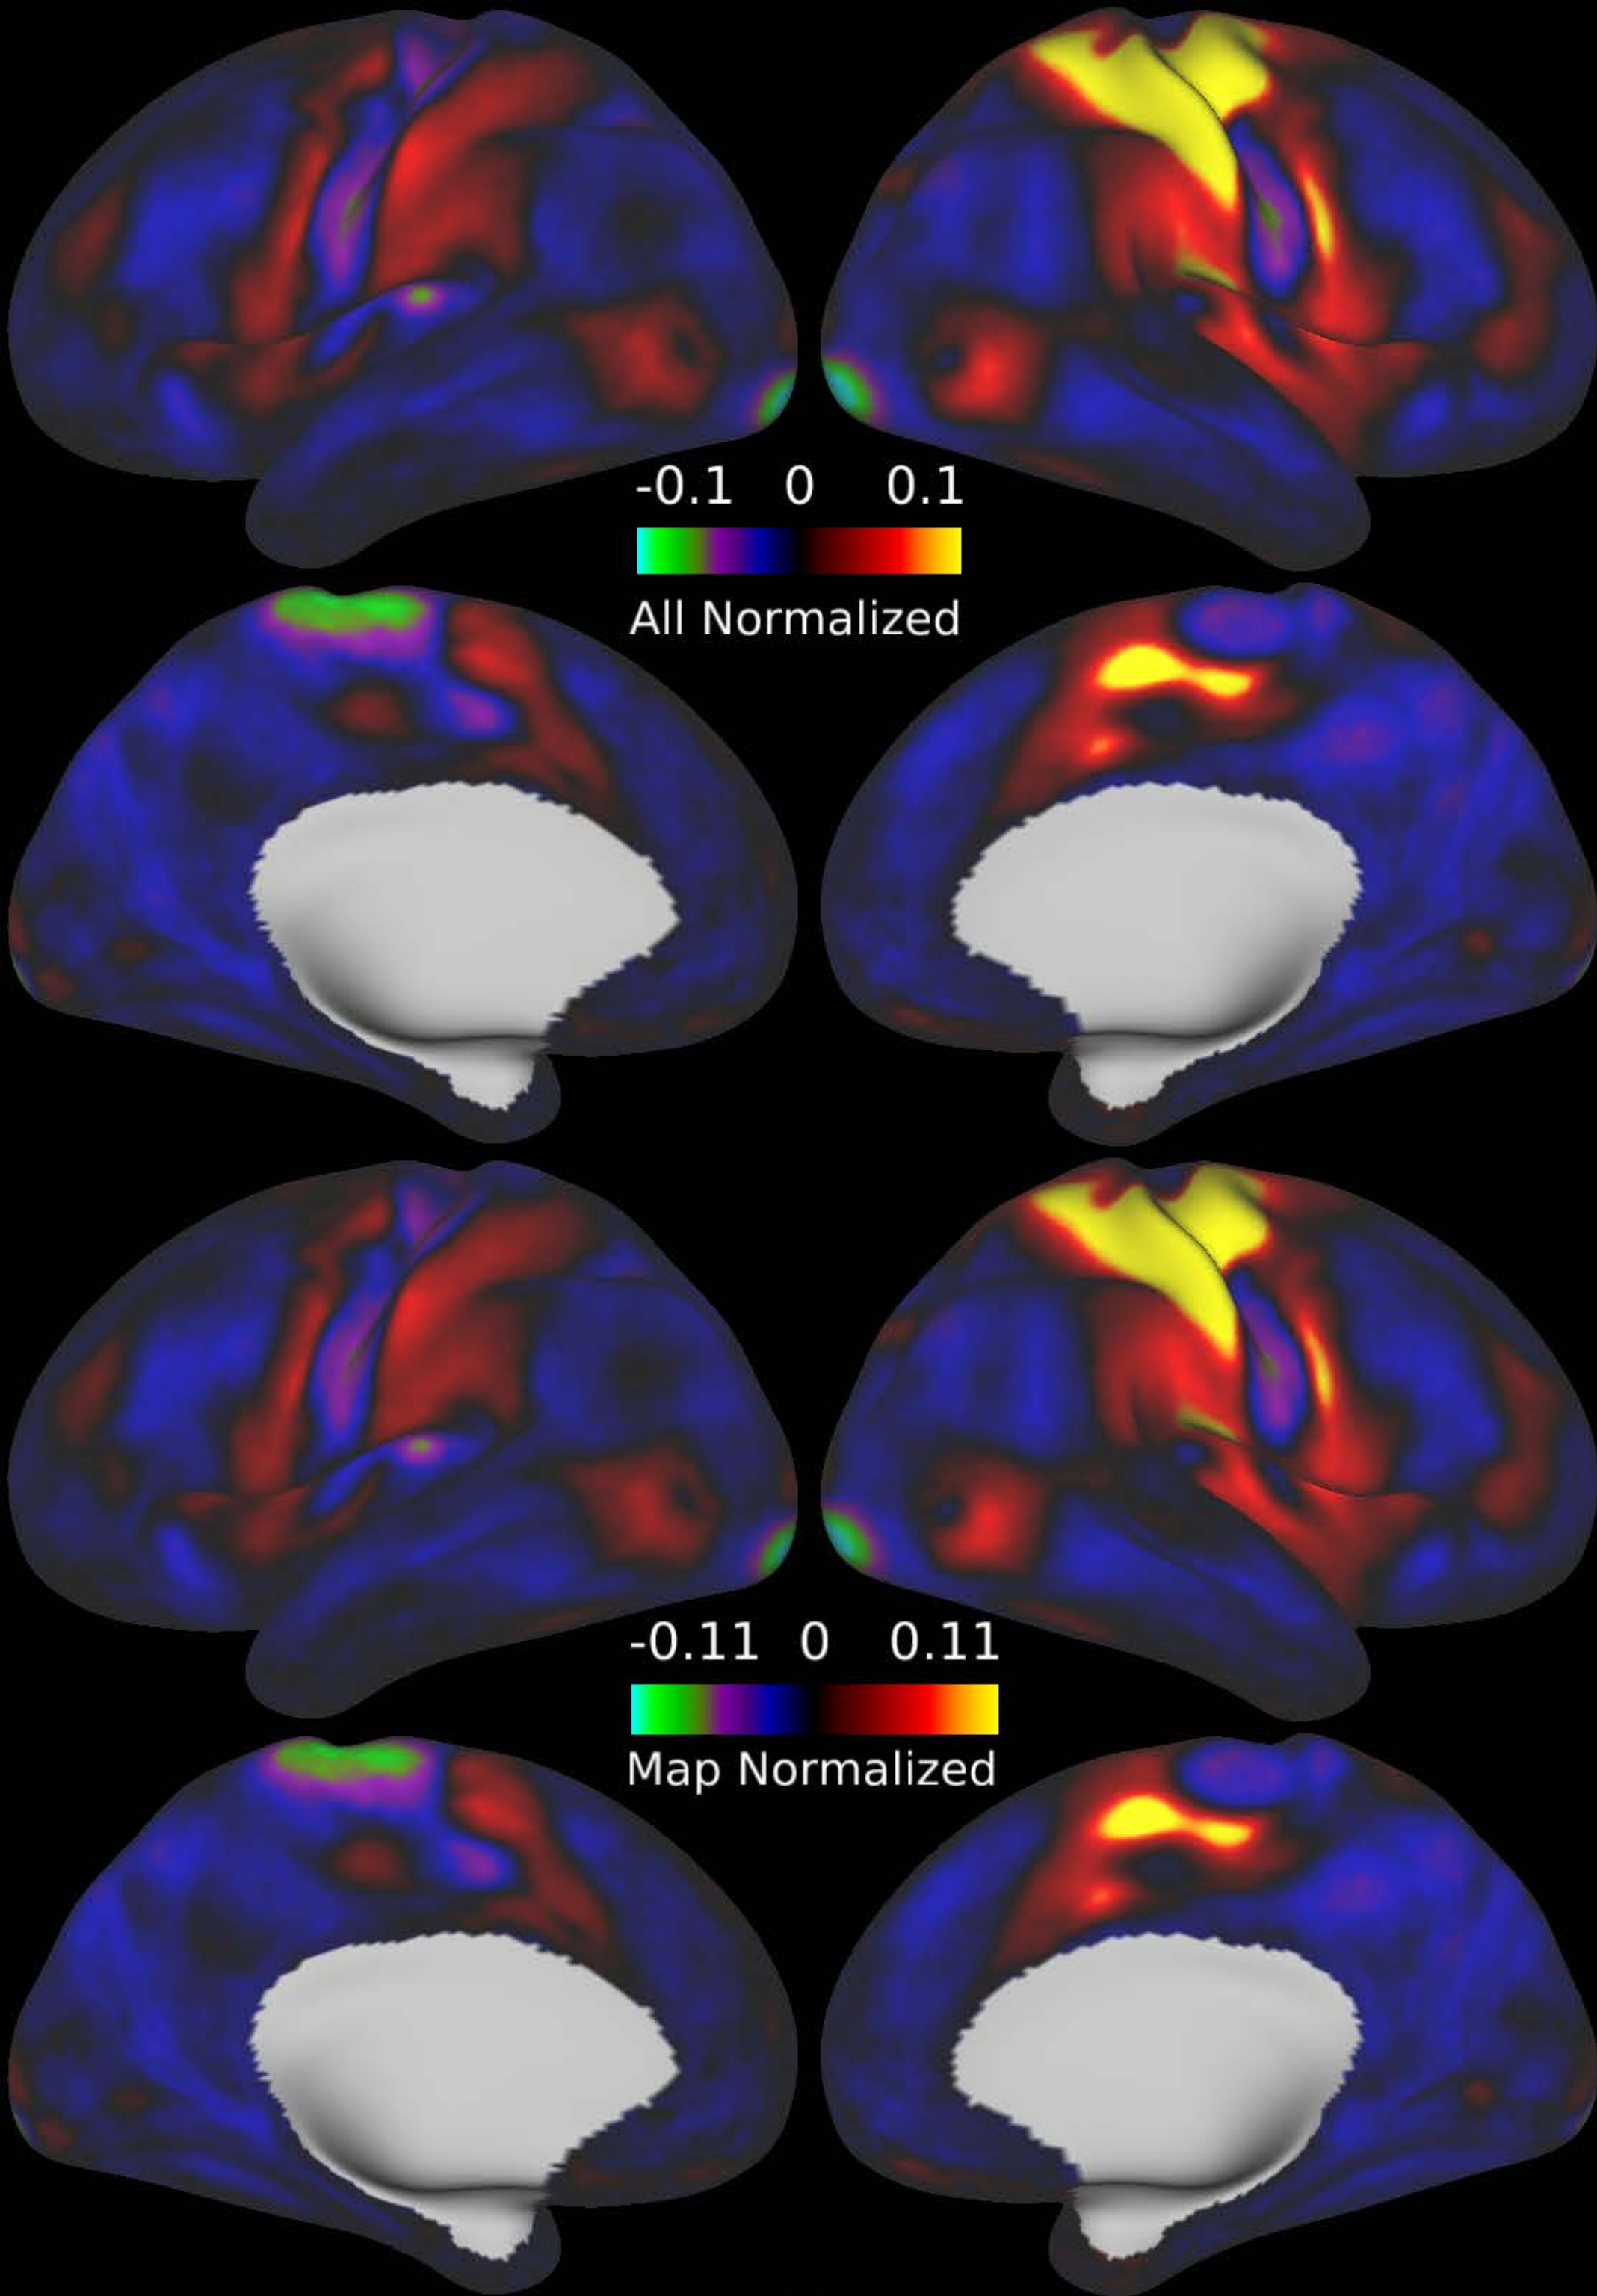

Hertz

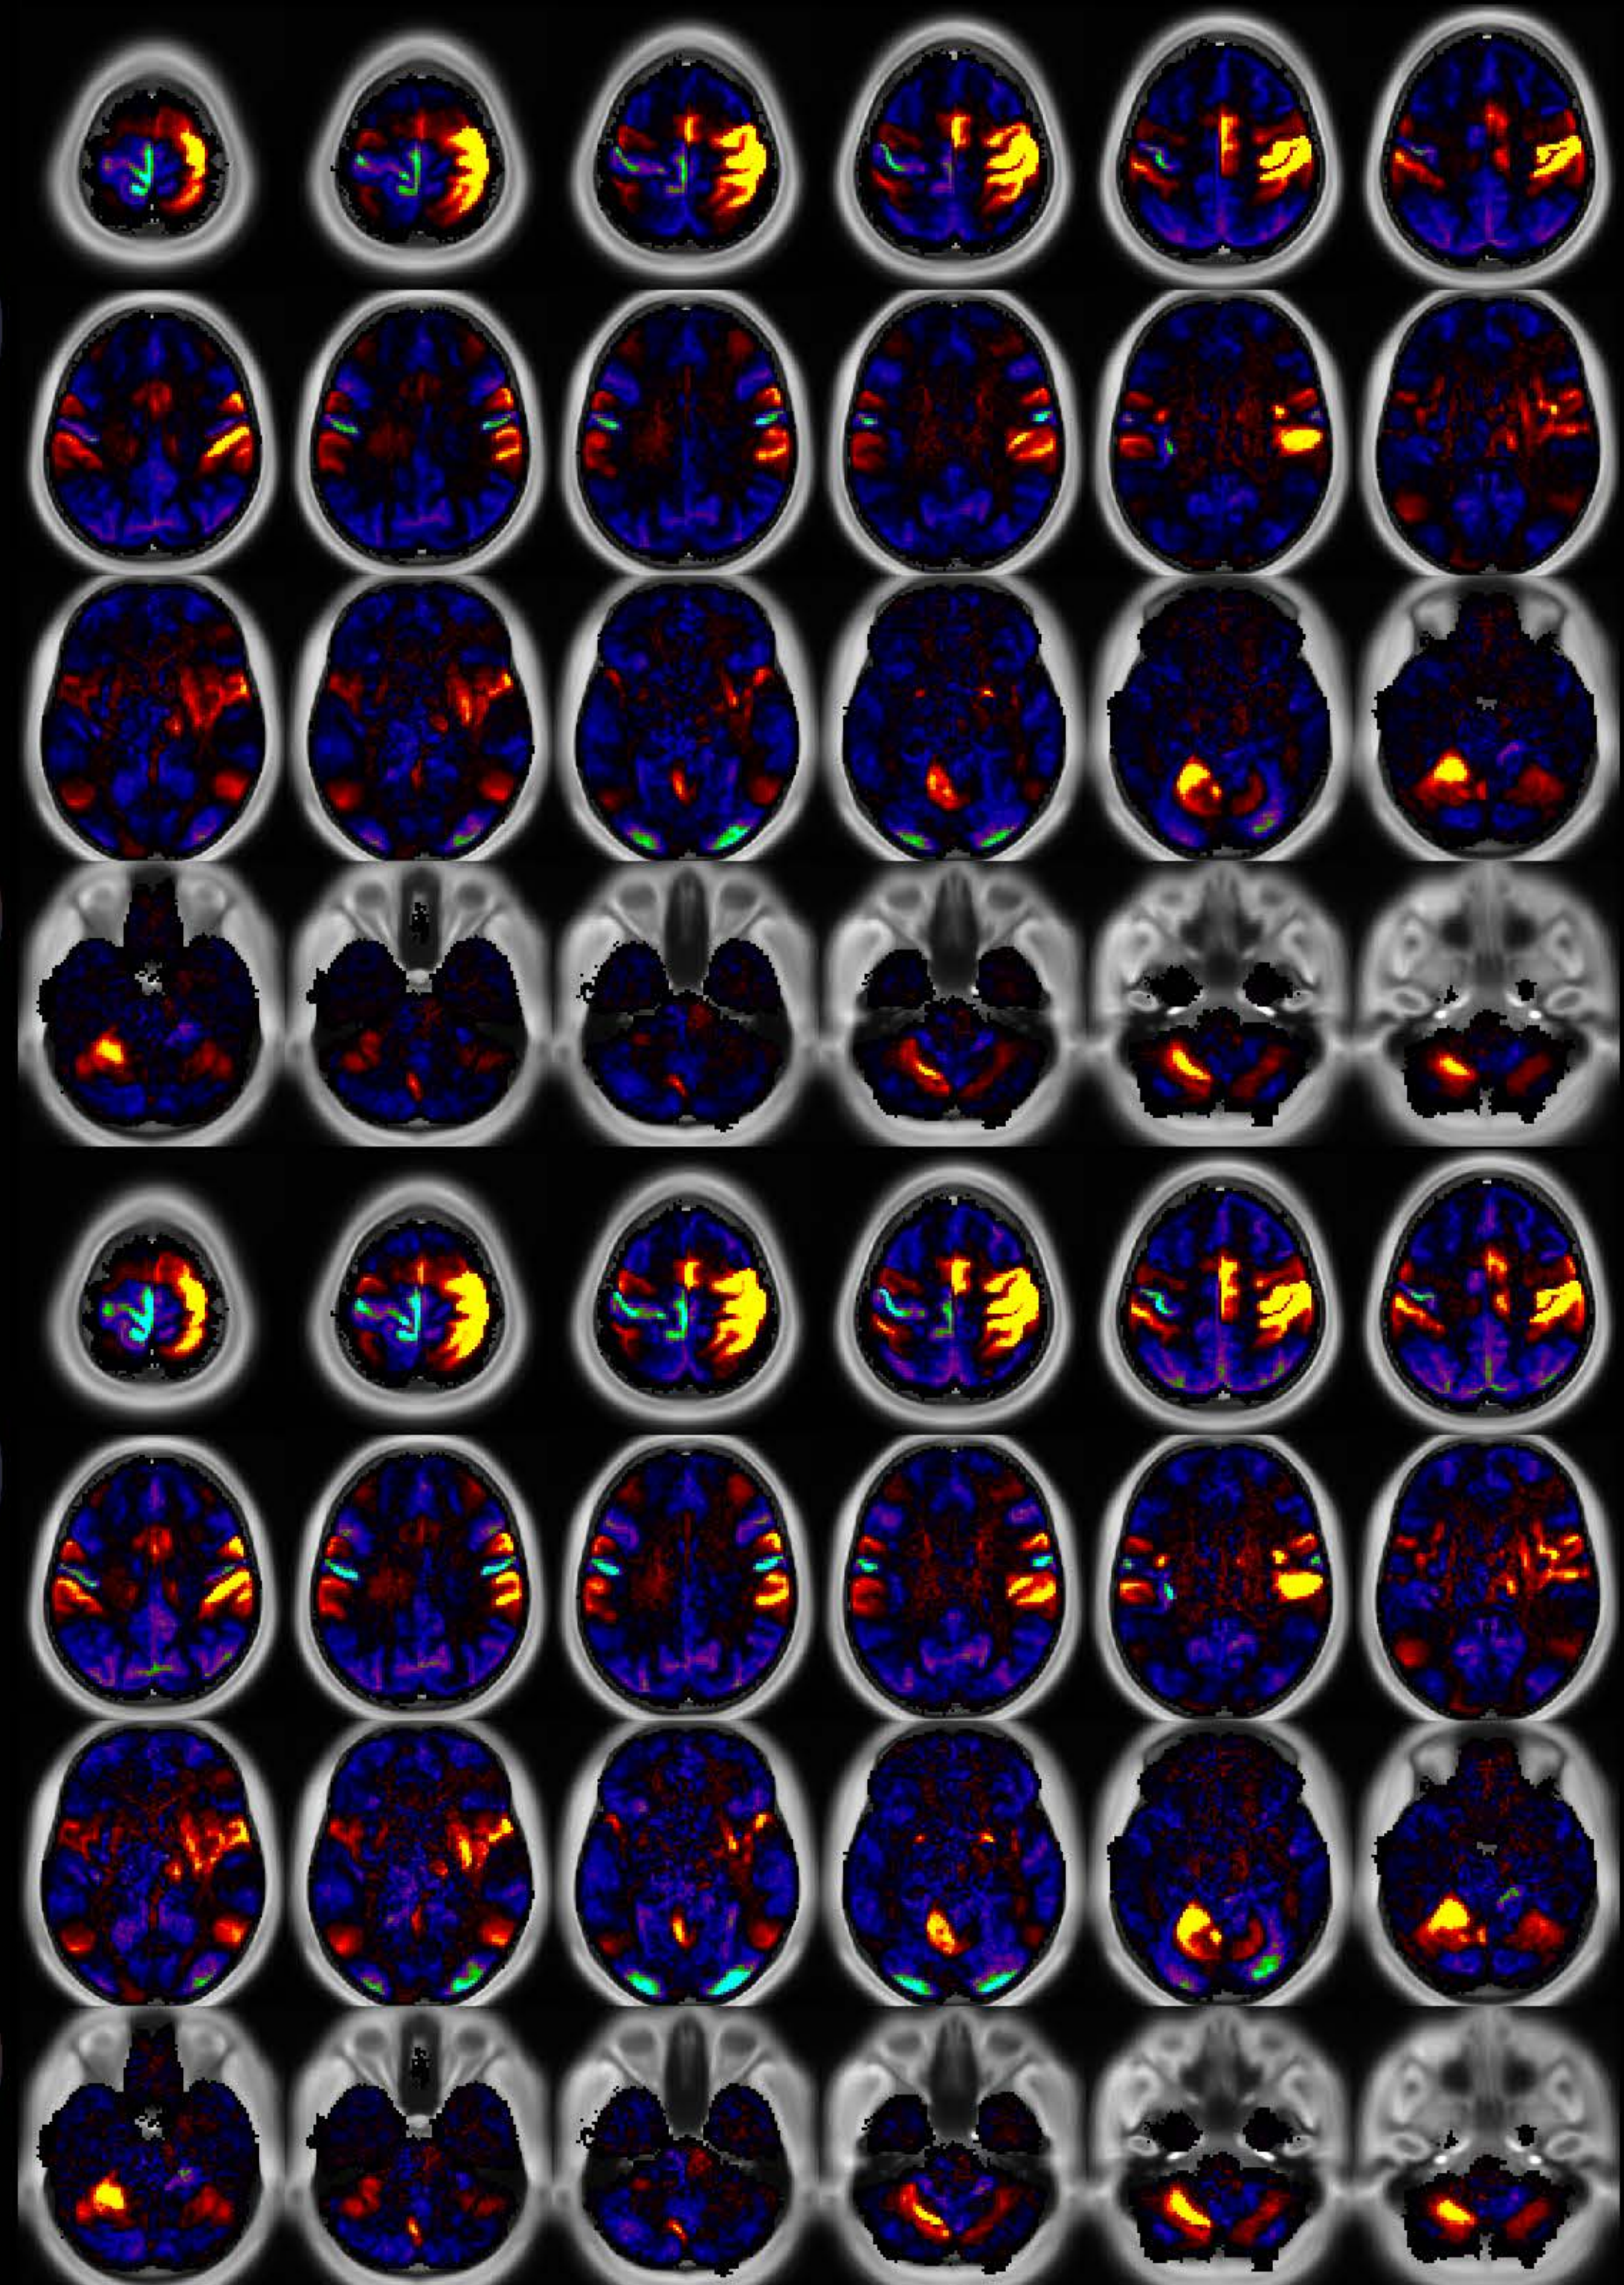

Seconds

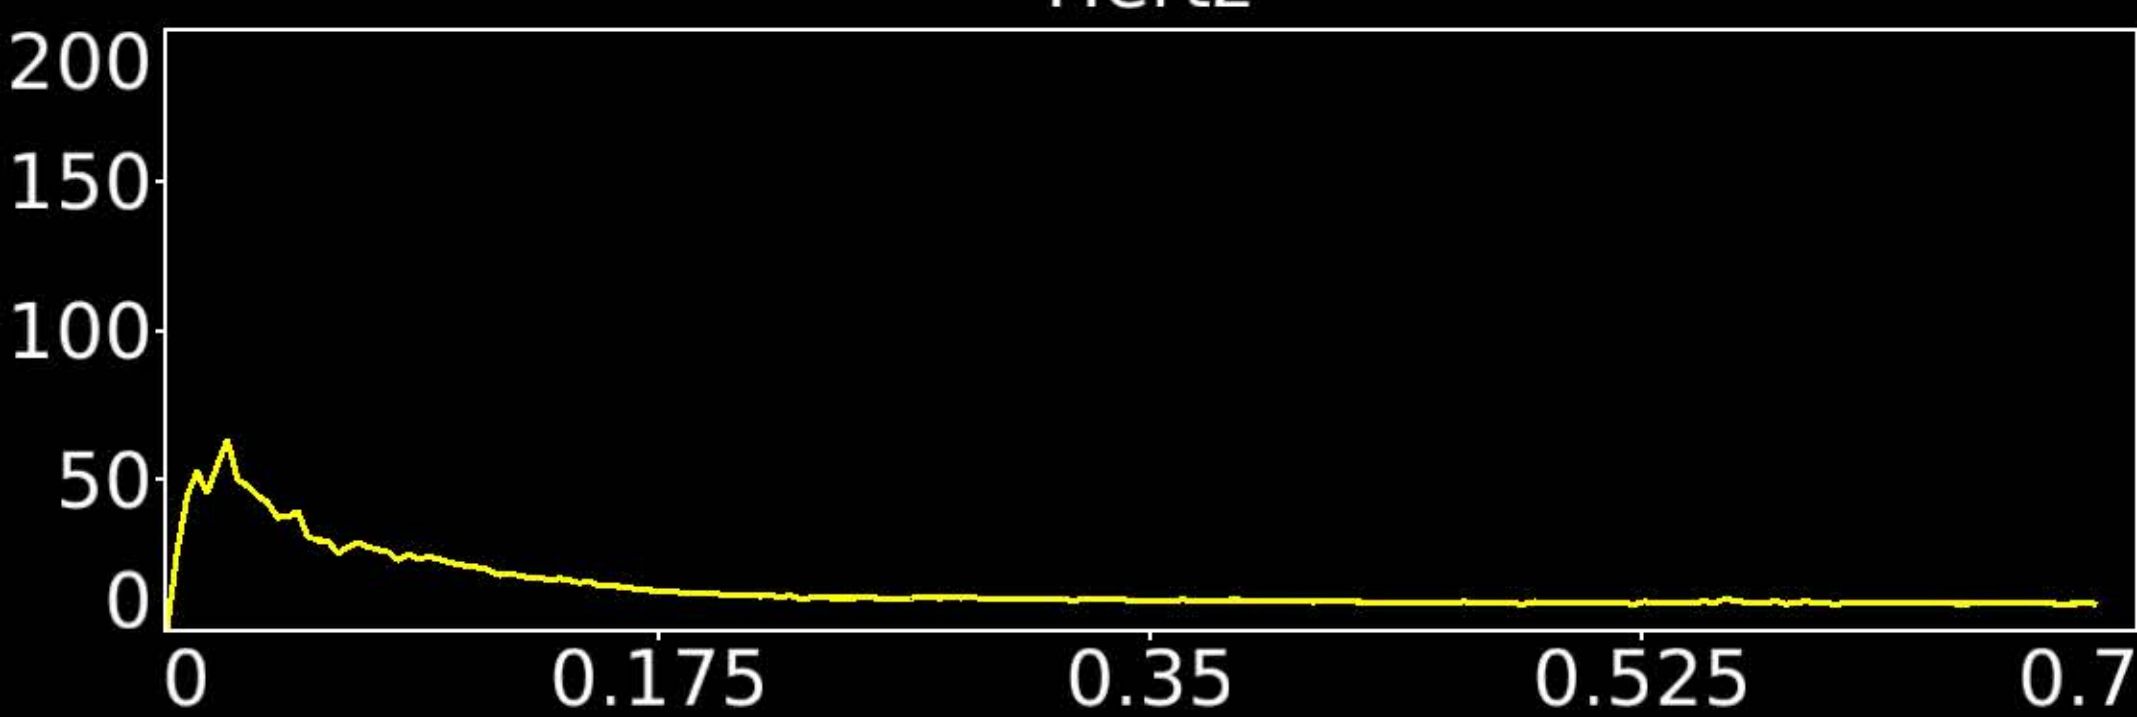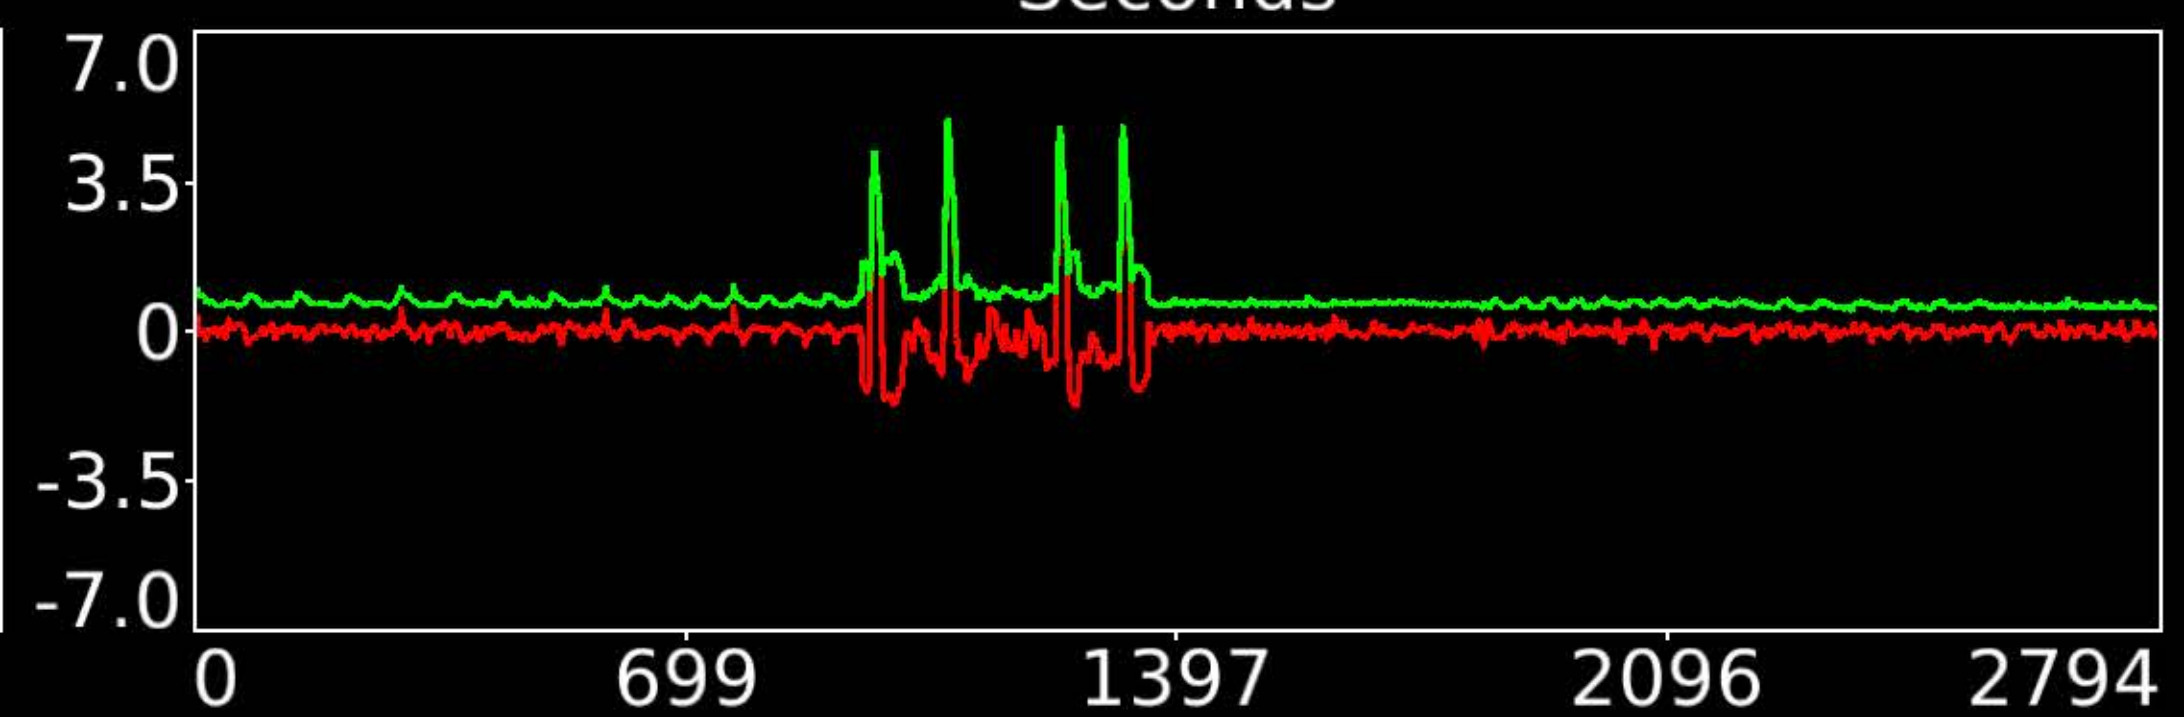

|                           |                            |                               |  |
|---------------------------|----------------------------|-------------------------------|--|
| Number & Class: 31 Signal |                            | Name: Left Hand Motor Network |  |
| RVT Correlated: No        | DVARS Dip Associated: Yes  | Cross-Subject Variable: Yes   |  |
| Single Subject: No        | % Variance Explained: 1.25 | Globality Index: 0.9          |  |
| Rest Component: 40        | Taskr Component: 26        | Task Modulated: Motor         |  |

Rationale: Spatial map includes positive and negative patches that respect known somatotopic sensori-motor organization (Left Hand)



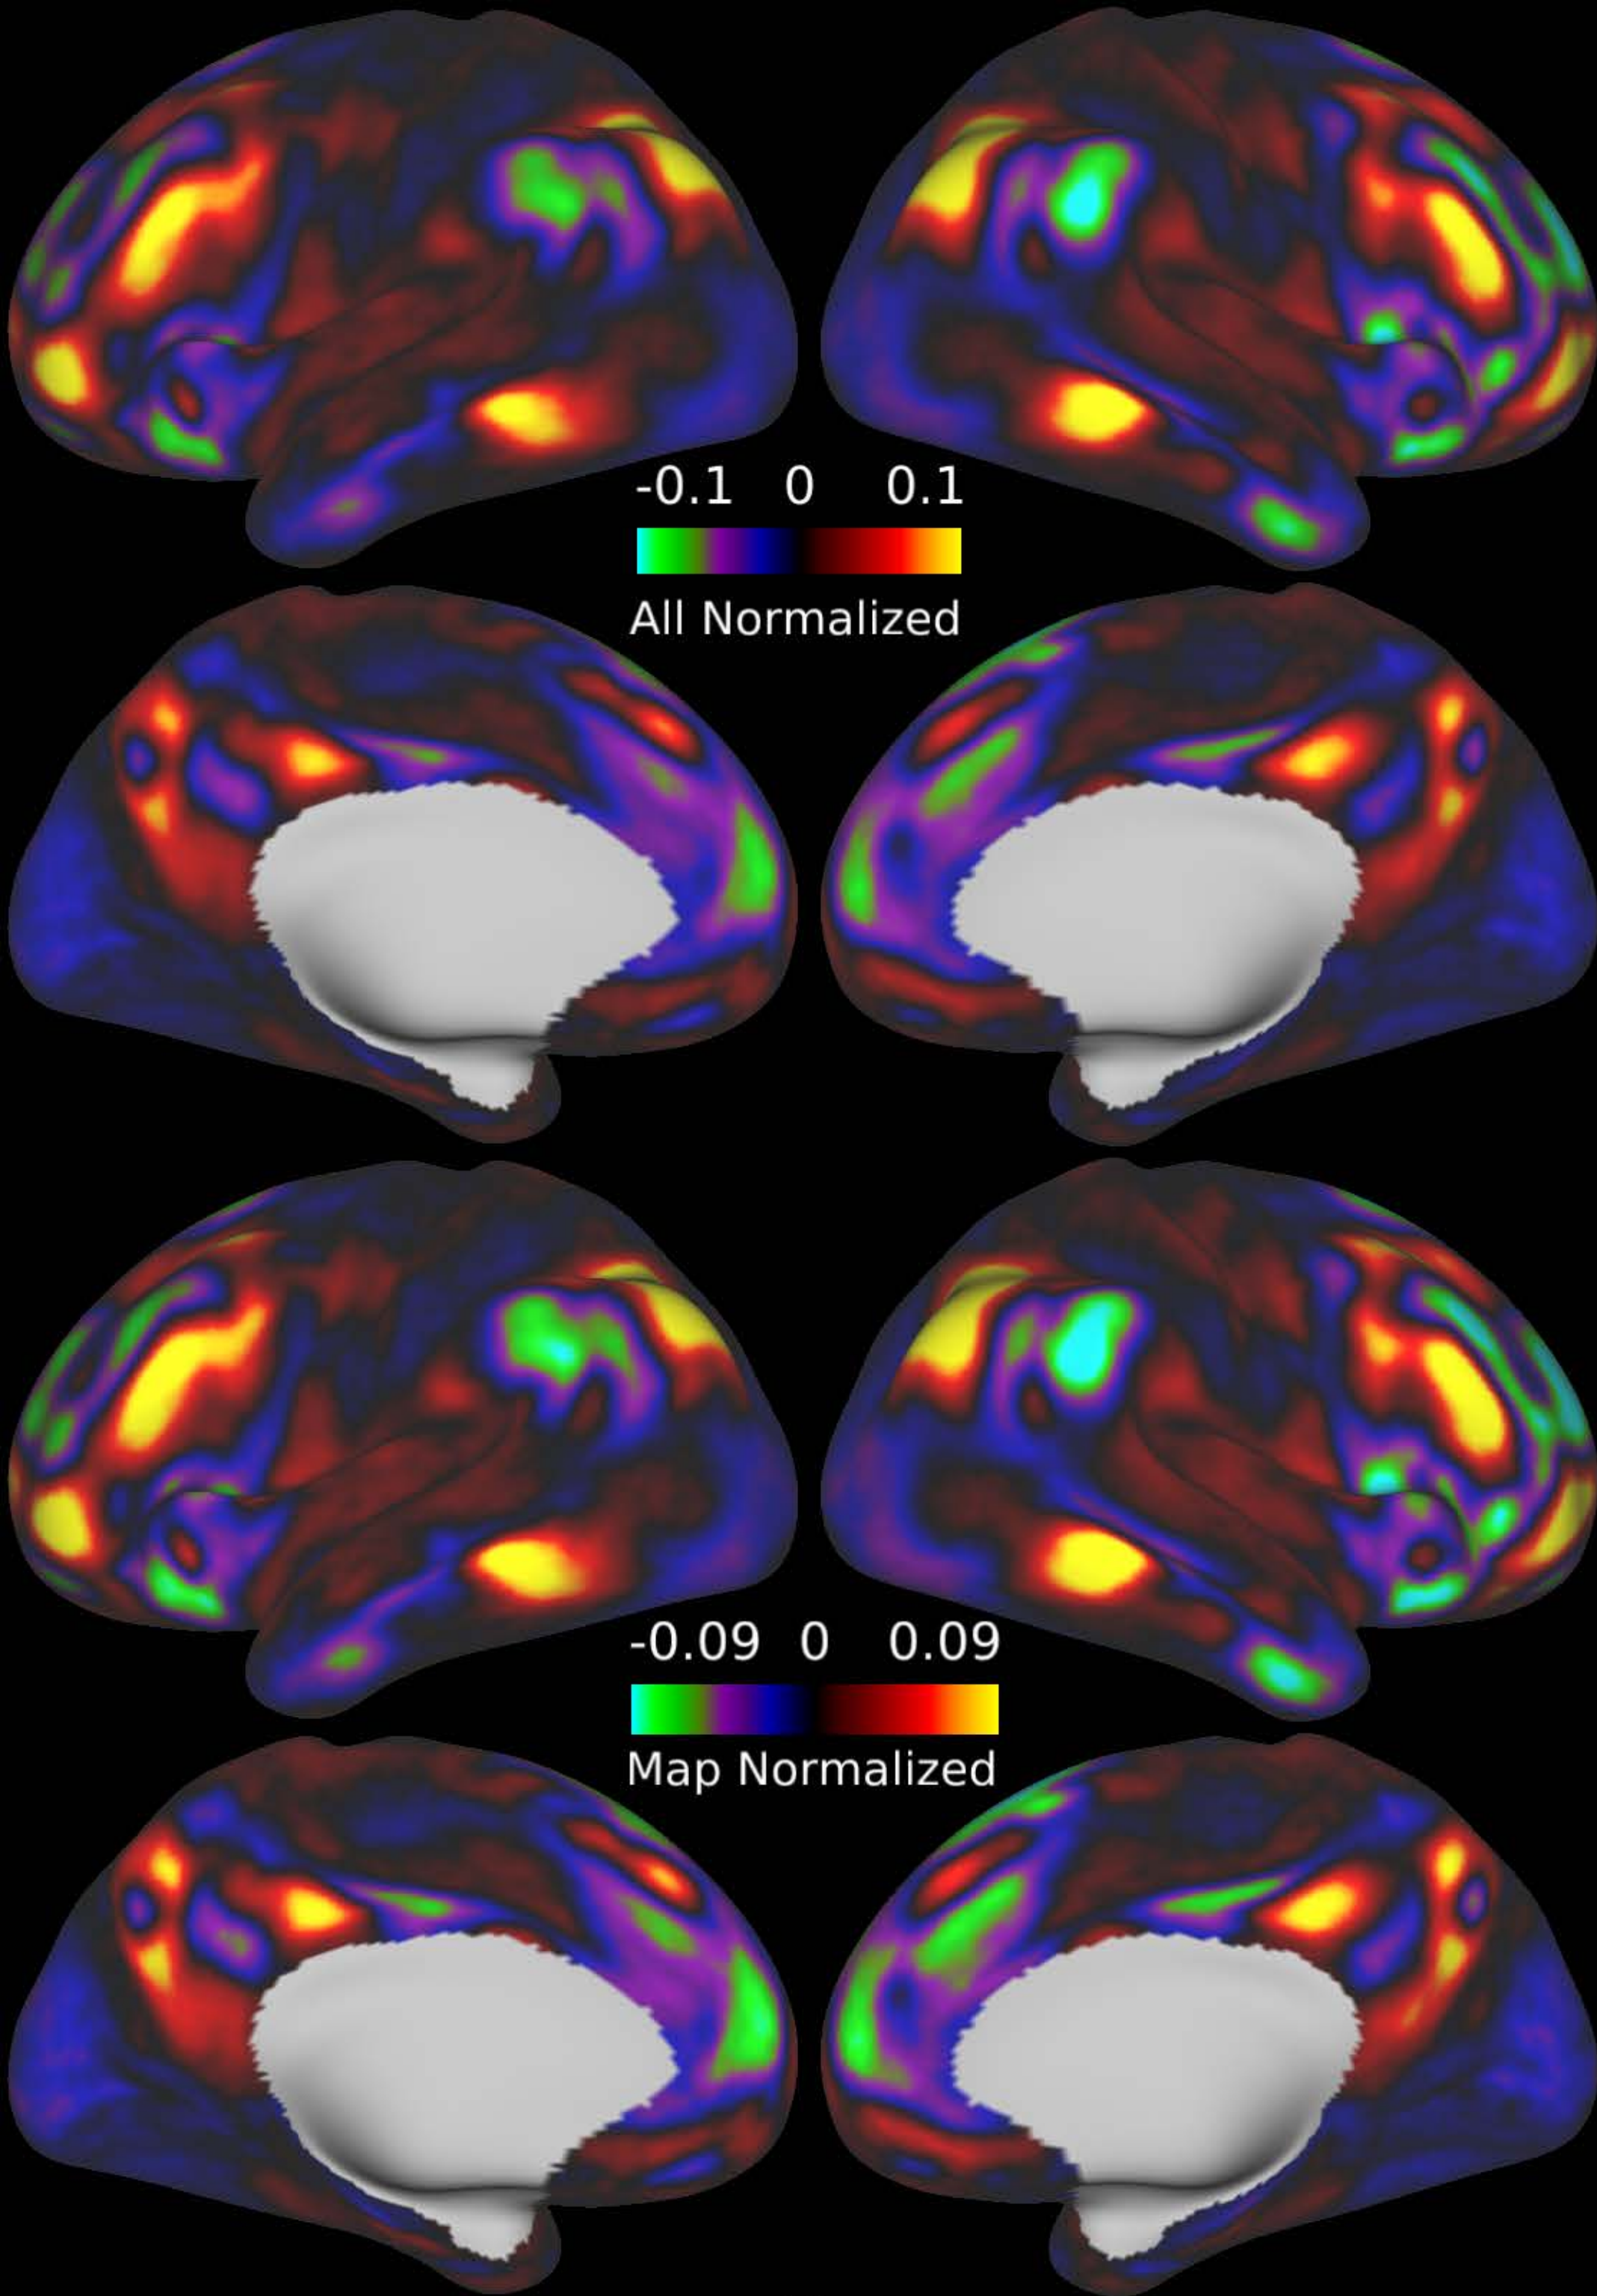

Hertz

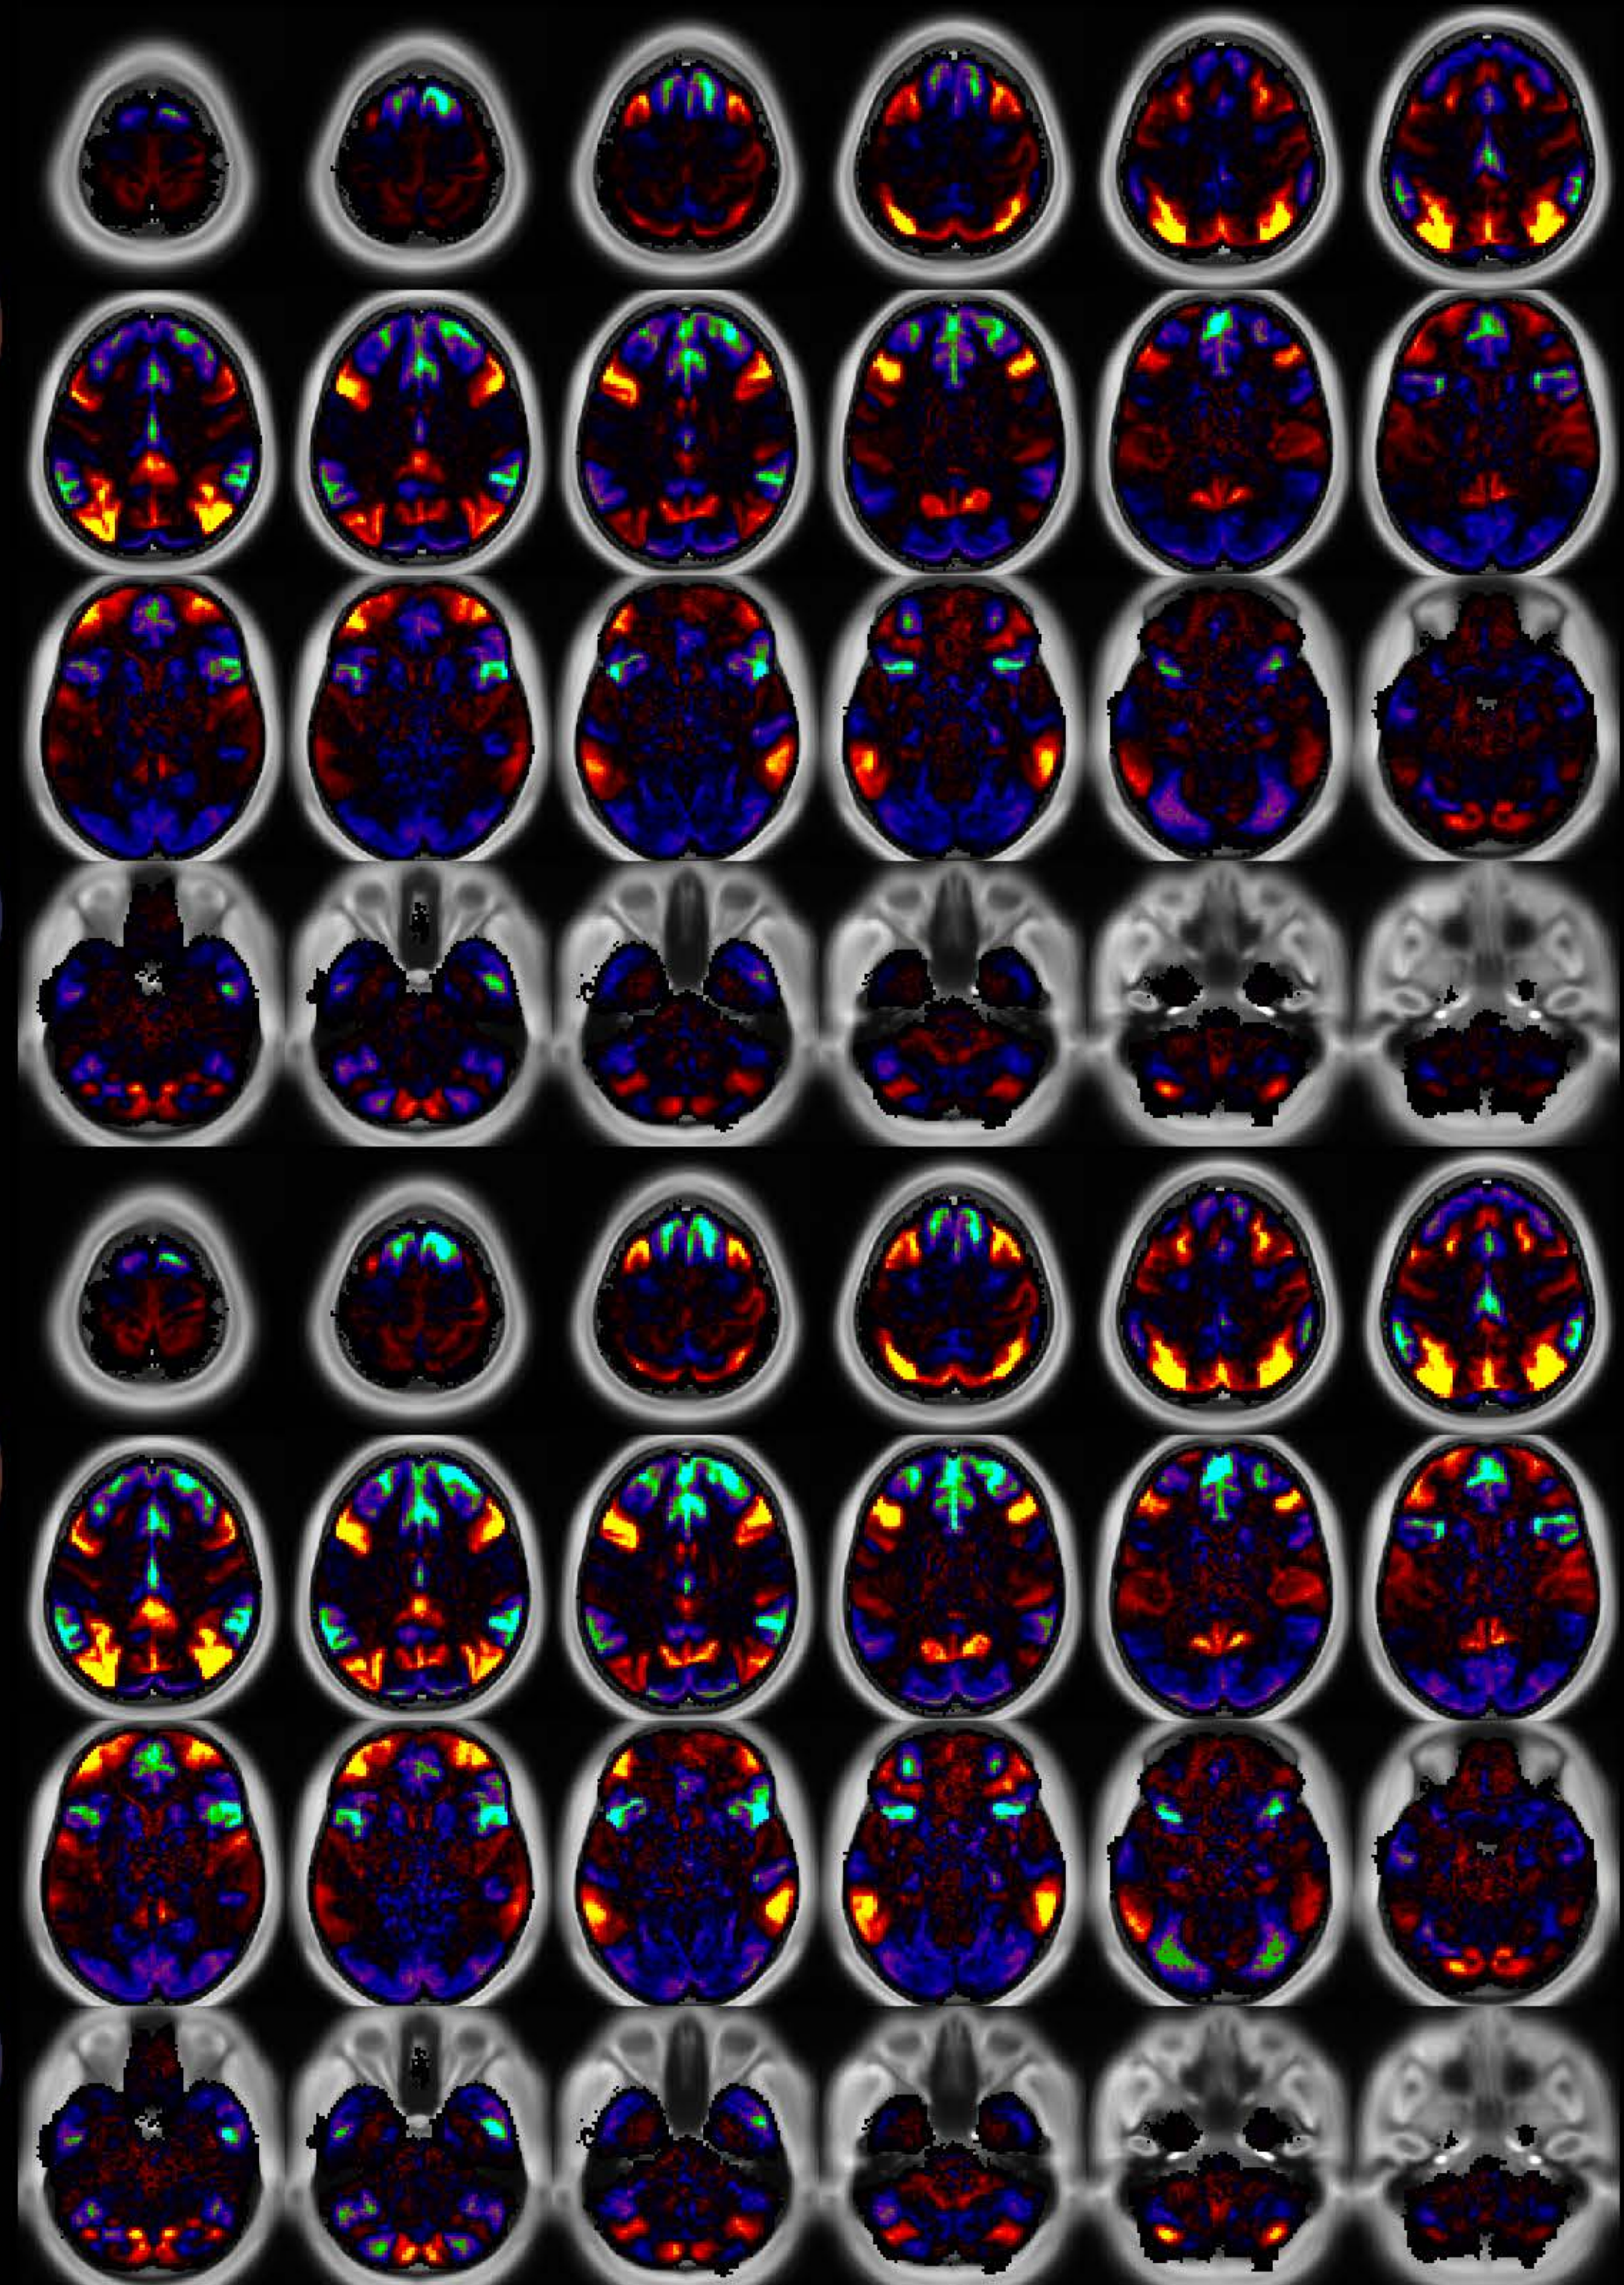

Seconds

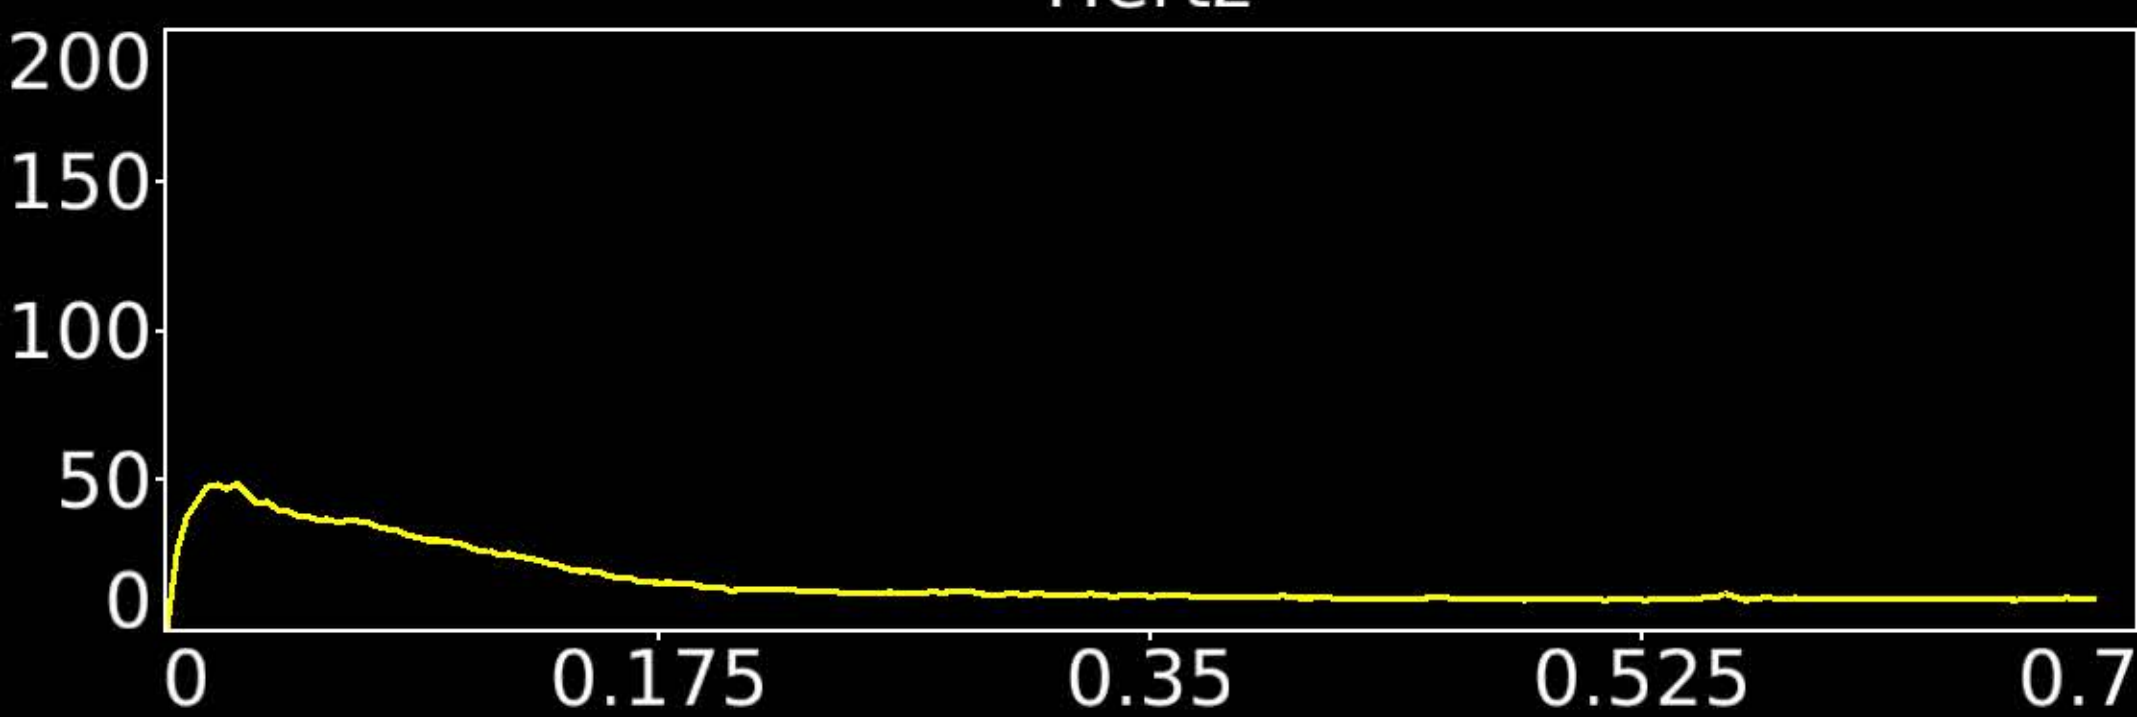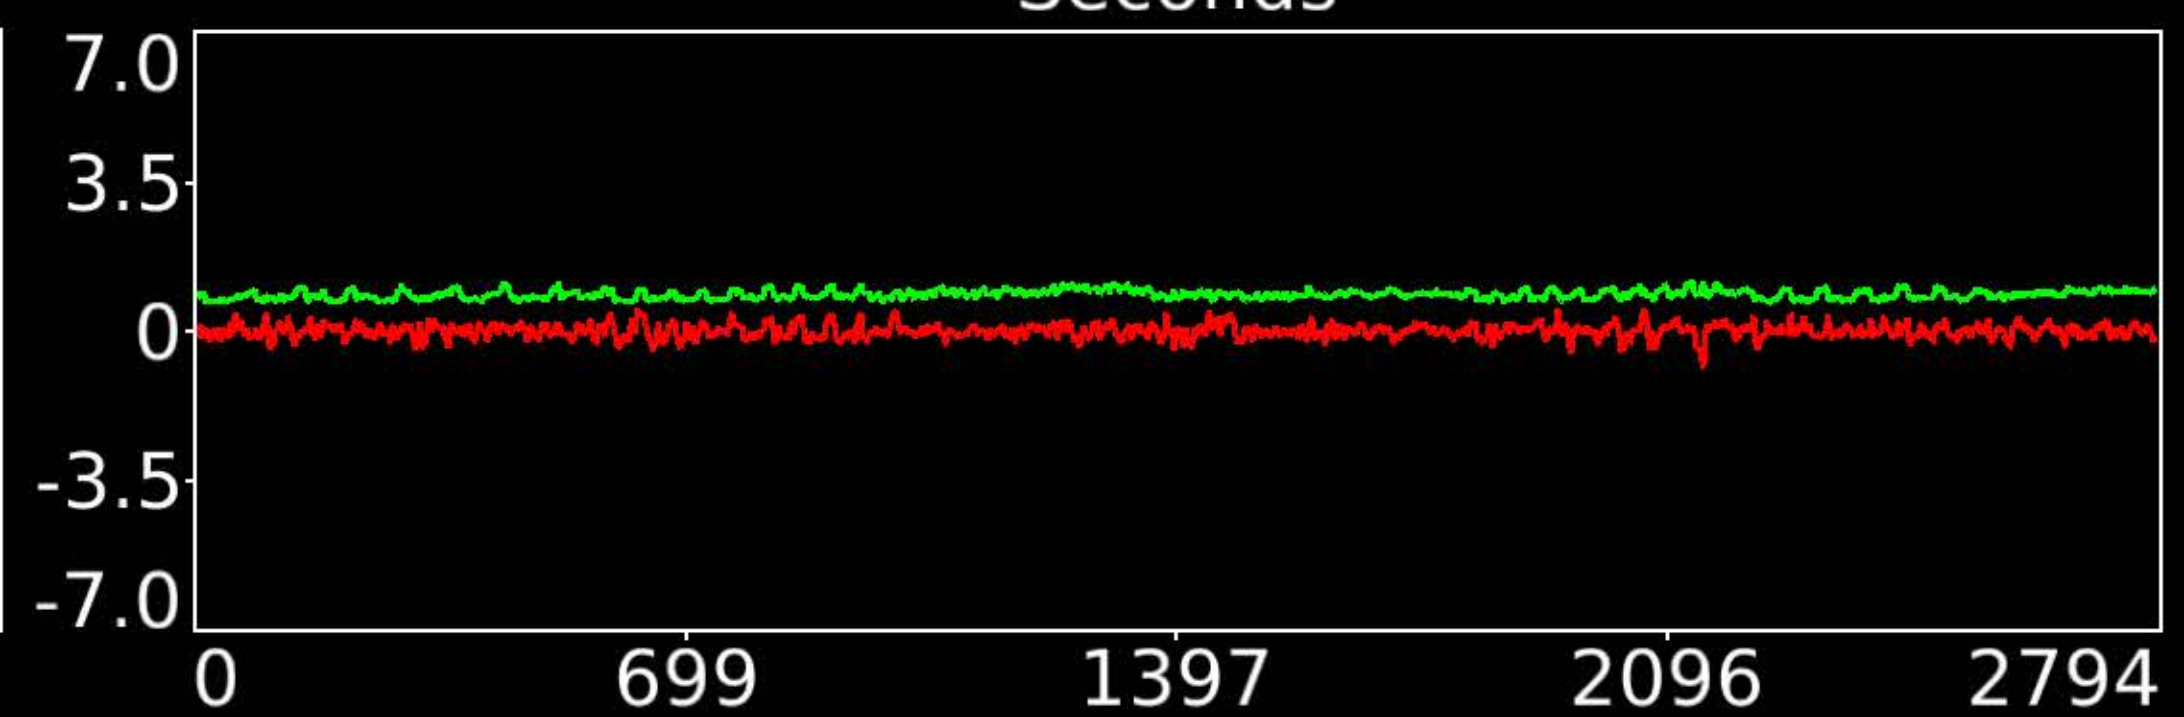

|                           |                            |                                          |  |
|---------------------------|----------------------------|------------------------------------------|--|
| Number & Class: 32 Signal |                            | Name: Subsidiary Fronto-parietal Network |  |
| RVT Correlated: No        | DVARS Dip Associated: No   | Cross-Subject Variable: No               |  |
| Single Subject: No        | % Variance Explained: 1.25 | Globality Index: 0.11                    |  |
| Rest Component: No        | Taskr Component: No        | Task Modulated: No                       |  |

Rationale: Spatial map includes positive and negative patches that respect known RSNs (e.g. Fronto-Parietal Network)



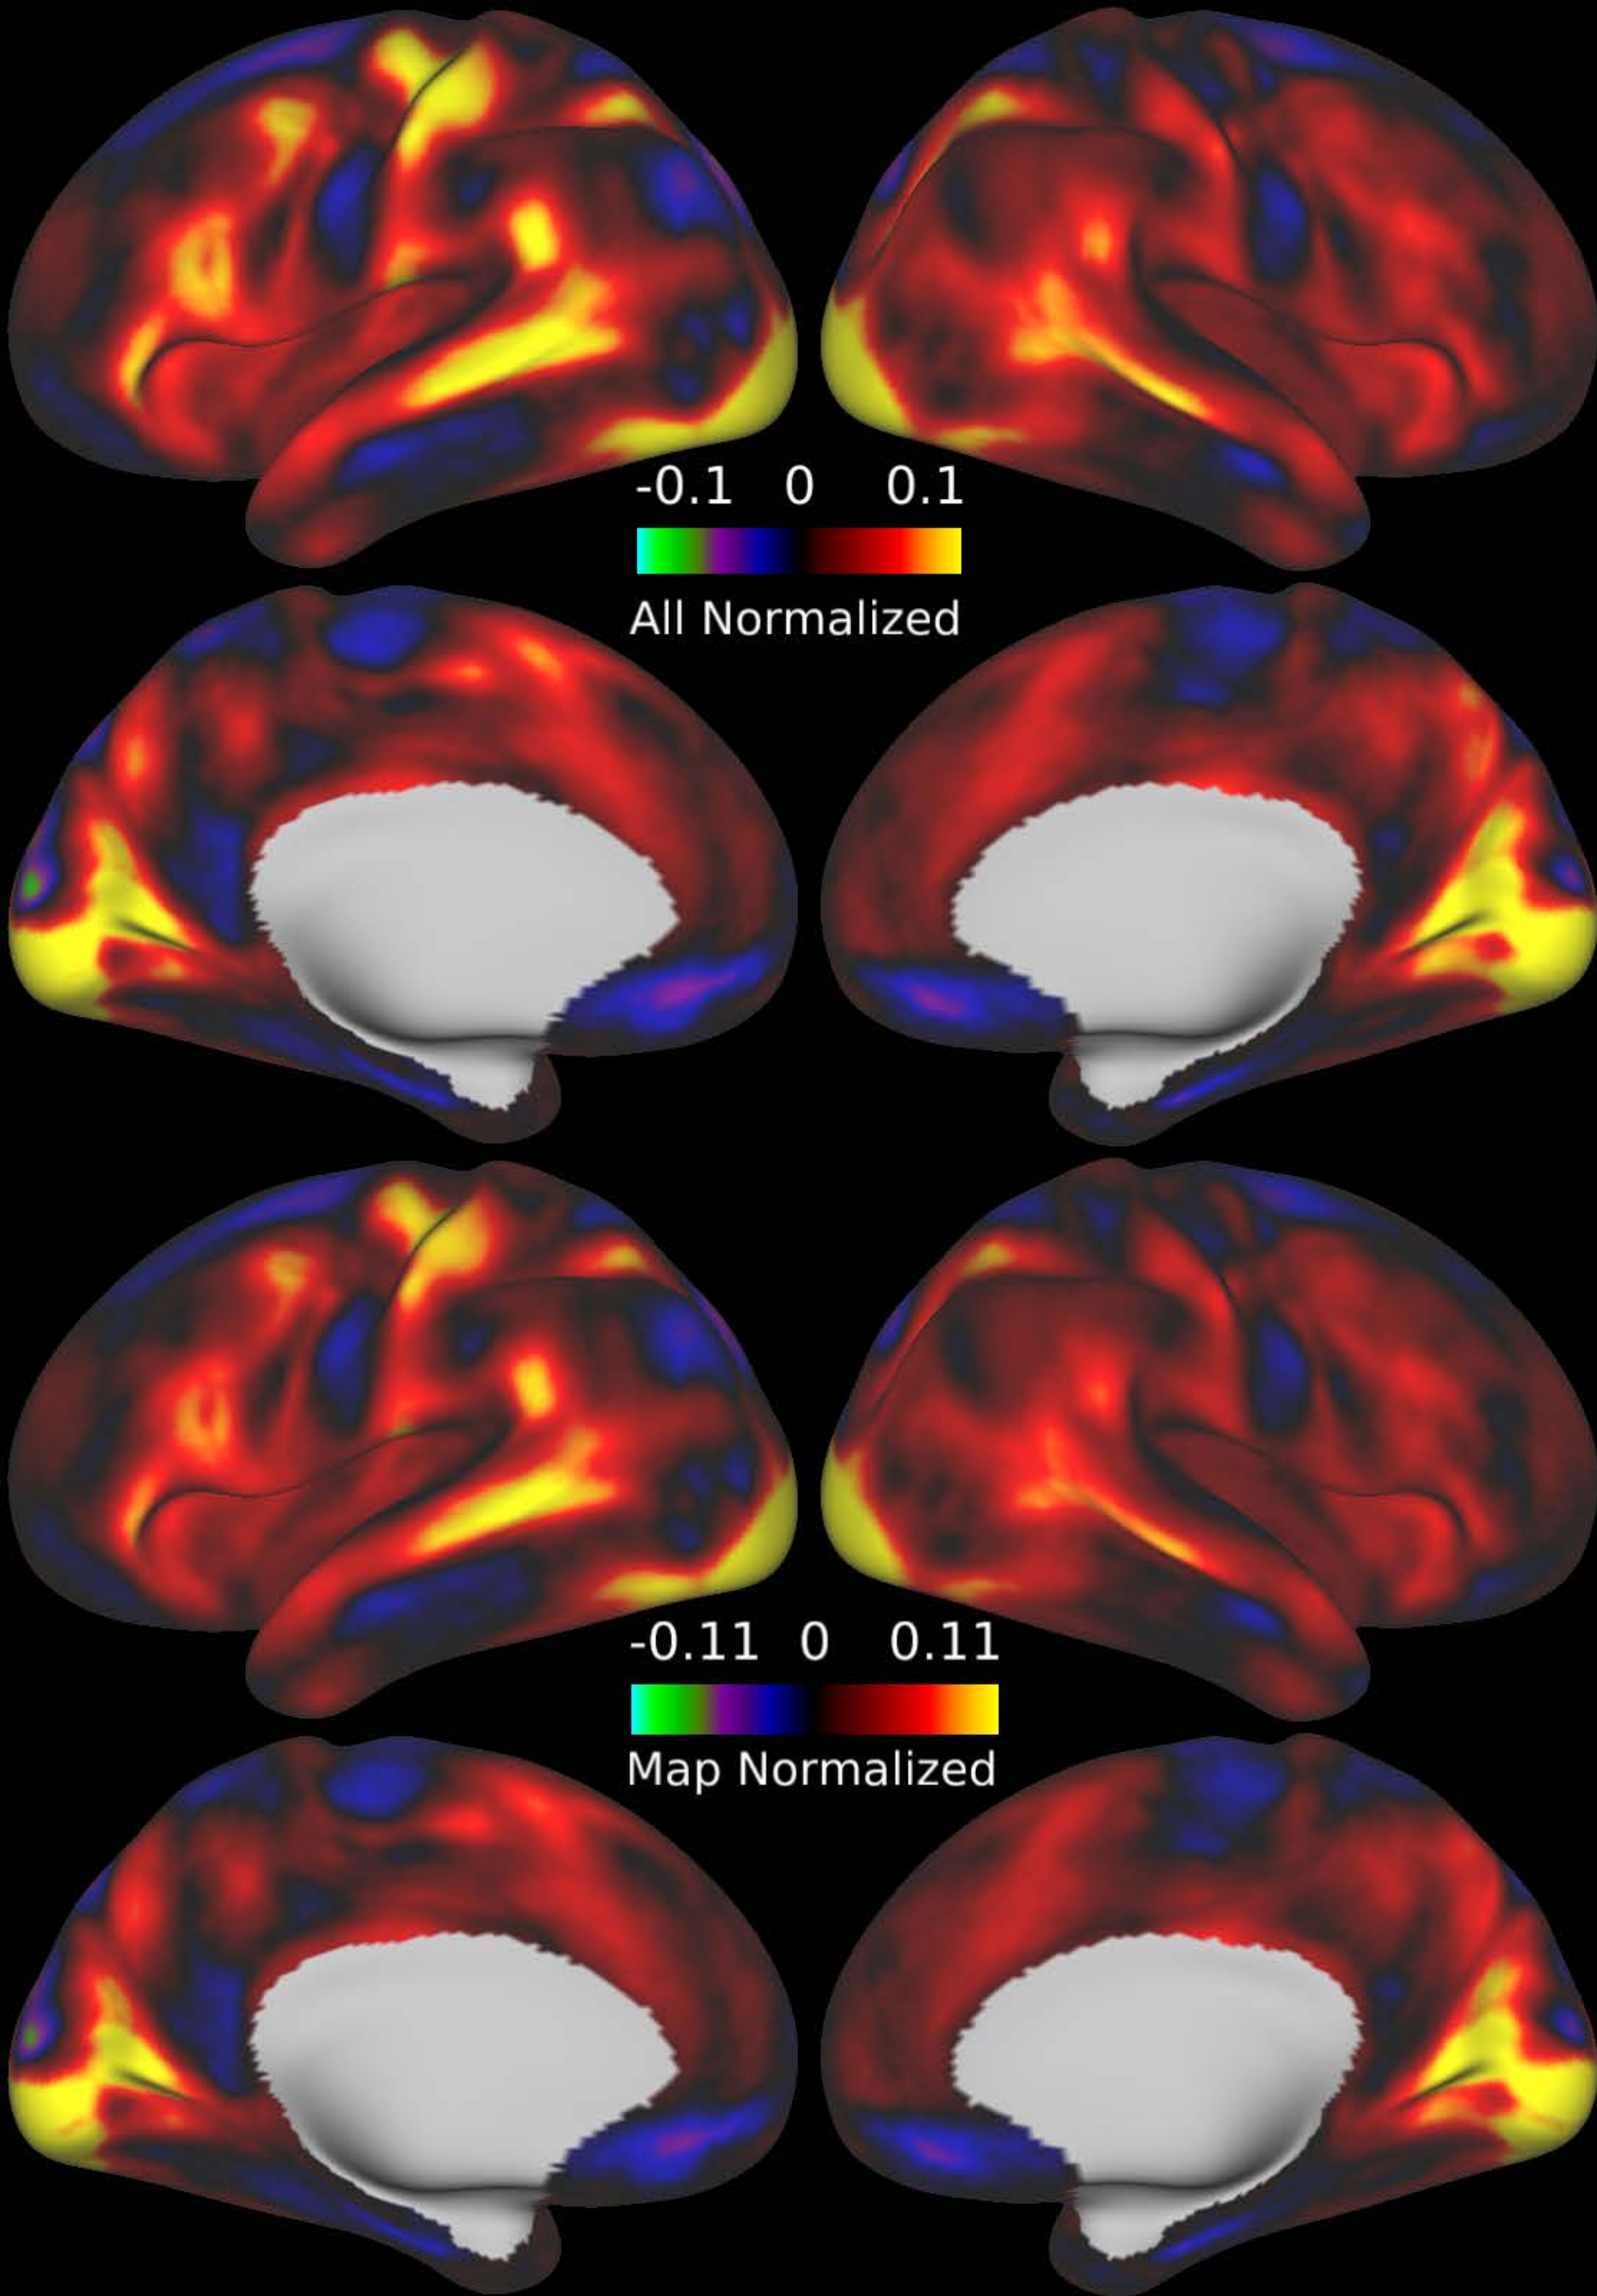

Hertz

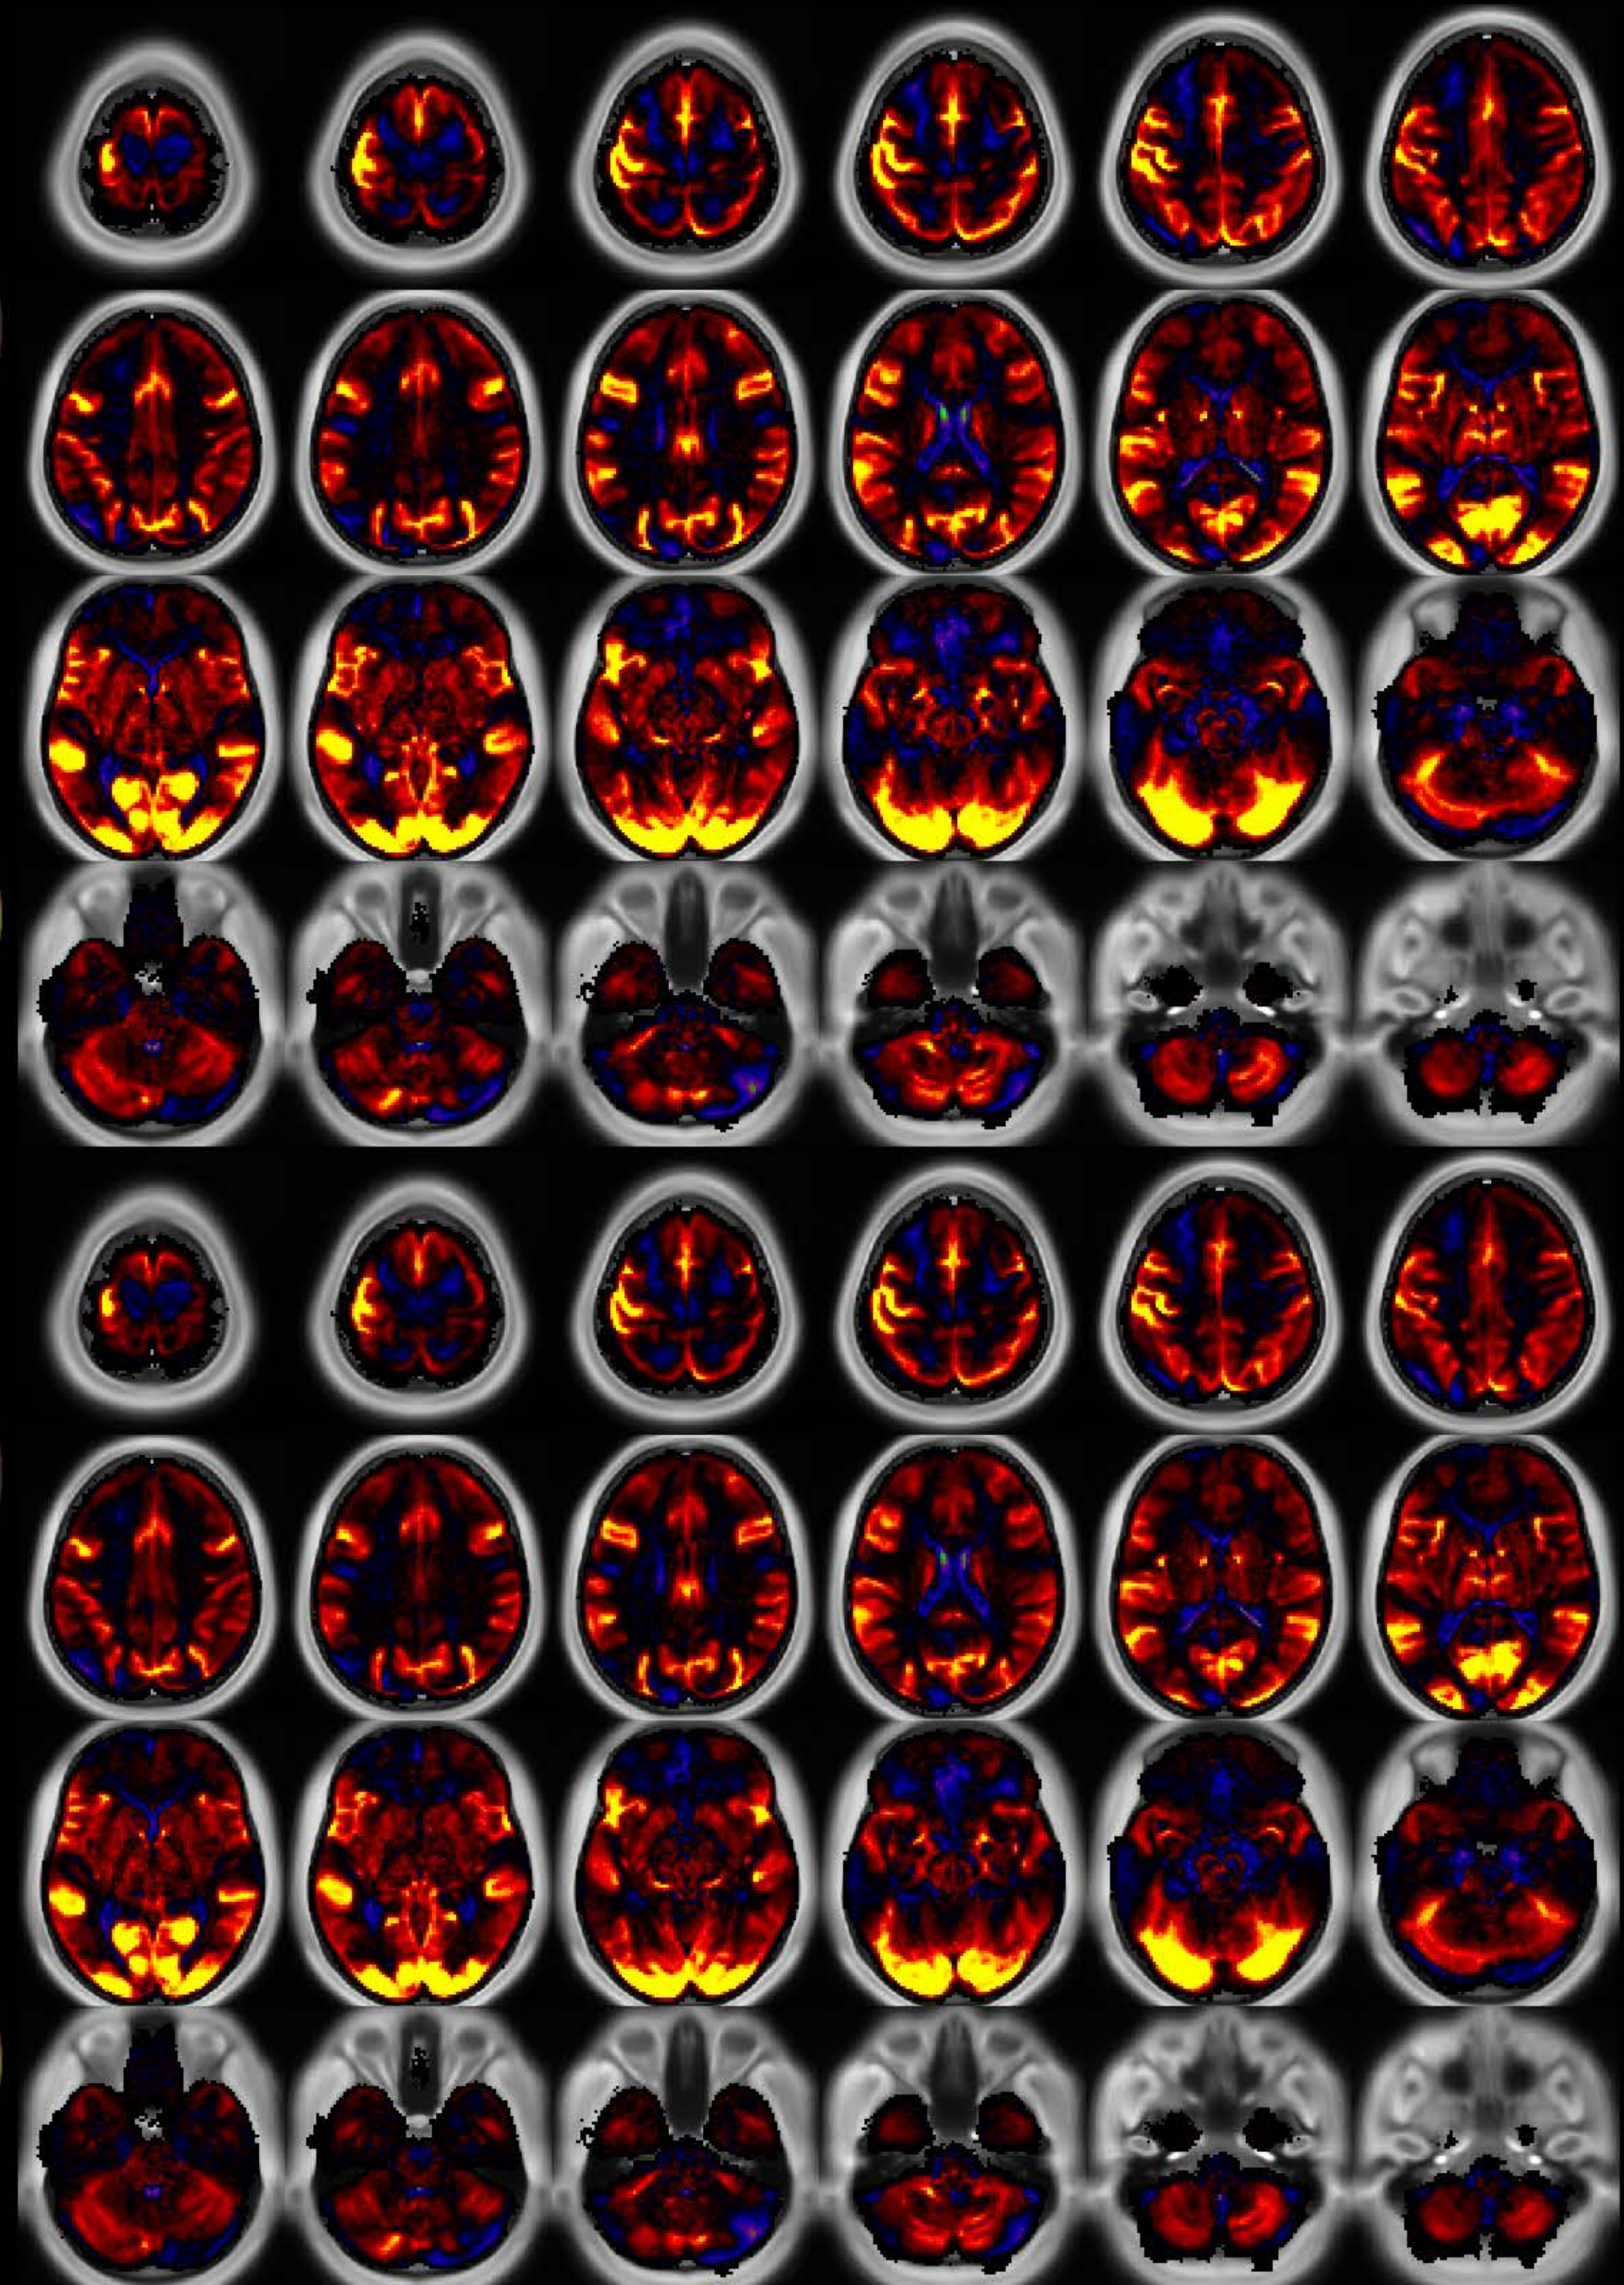

Seconds

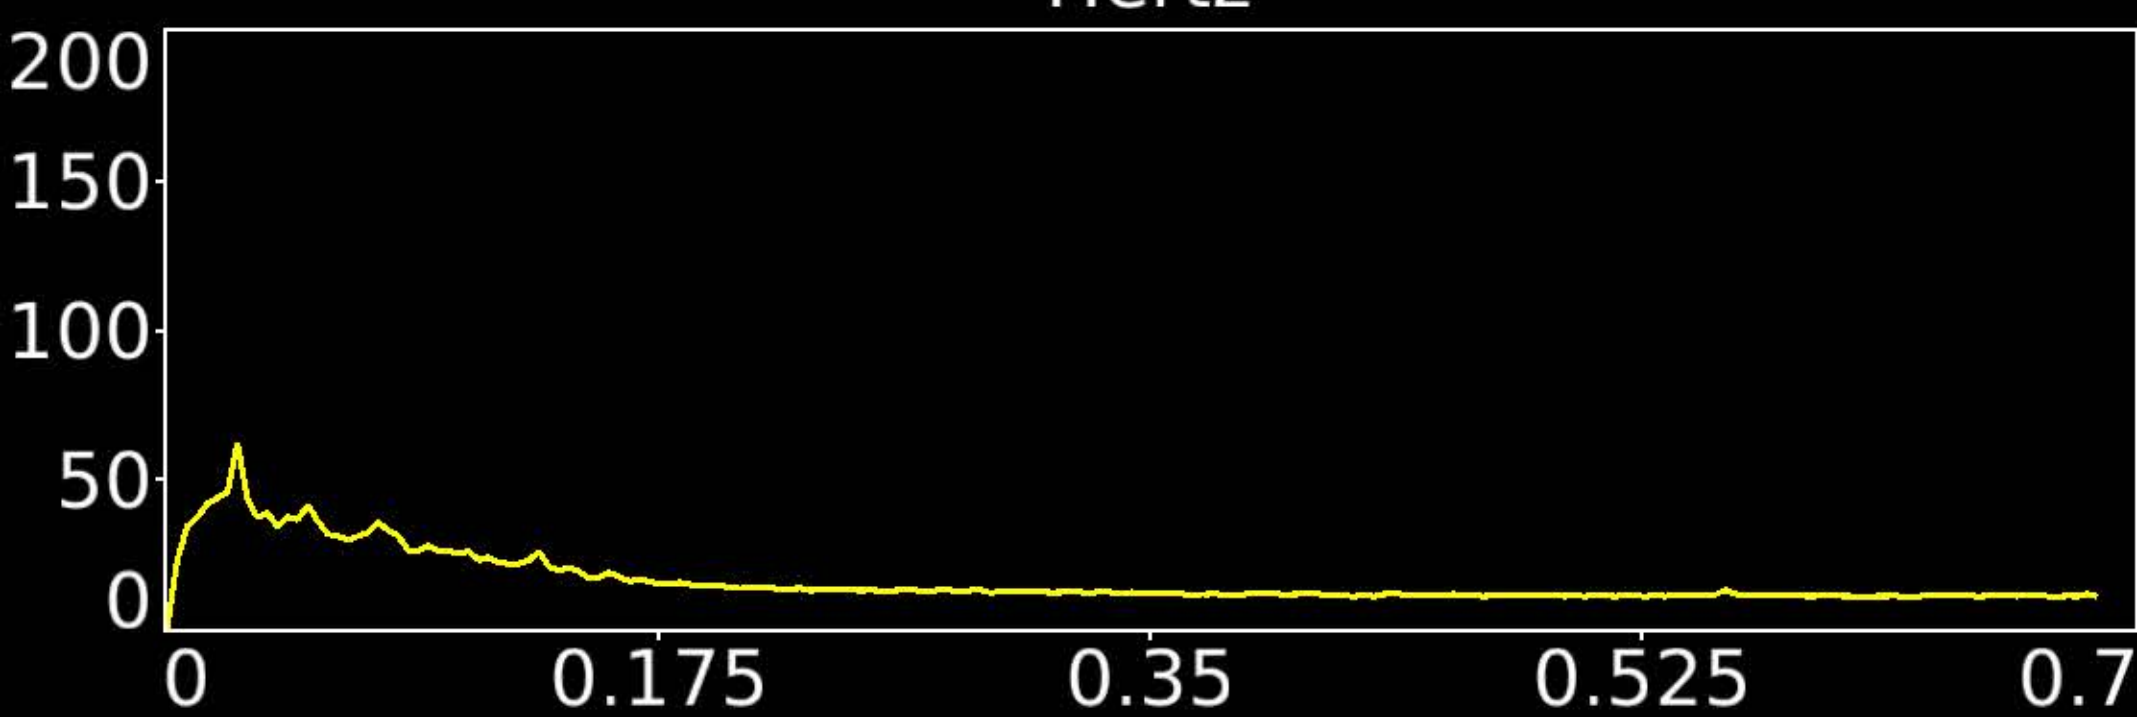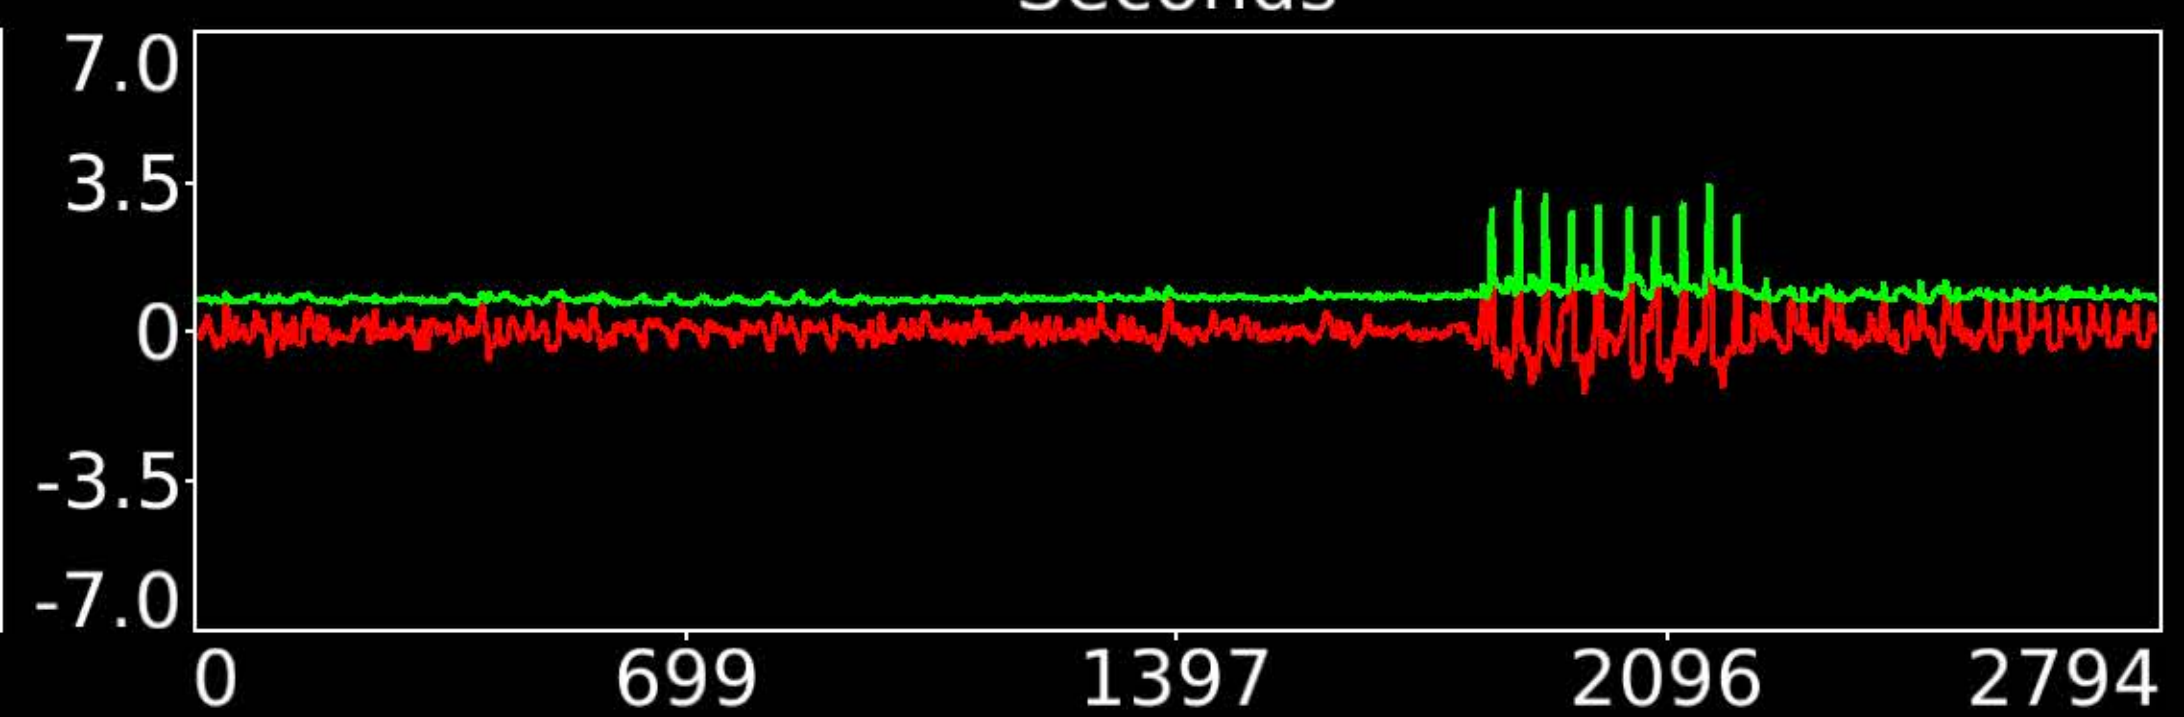

|                                                                                                               |                            |                            |  |
|---------------------------------------------------------------------------------------------------------------|----------------------------|----------------------------|--|
| Number & Class: 33 Signal                                                                                     |                            | Name: Unknown Network      |  |
| RVT Correlated: No                                                                                            | DVARS Dip Associated: No   | Cross-Subject Variable: No |  |
| Single Subject: No                                                                                            | % Variance Explained: 1.24 | Globality Index: 2.19      |  |
| Rest Component: No                                                                                            | Taskr Component: No        | Task Modulated: Social     |  |
| Rationale: Spatial map includes positive and negative patches that are correlated with a specific task design |                            |                            |  |



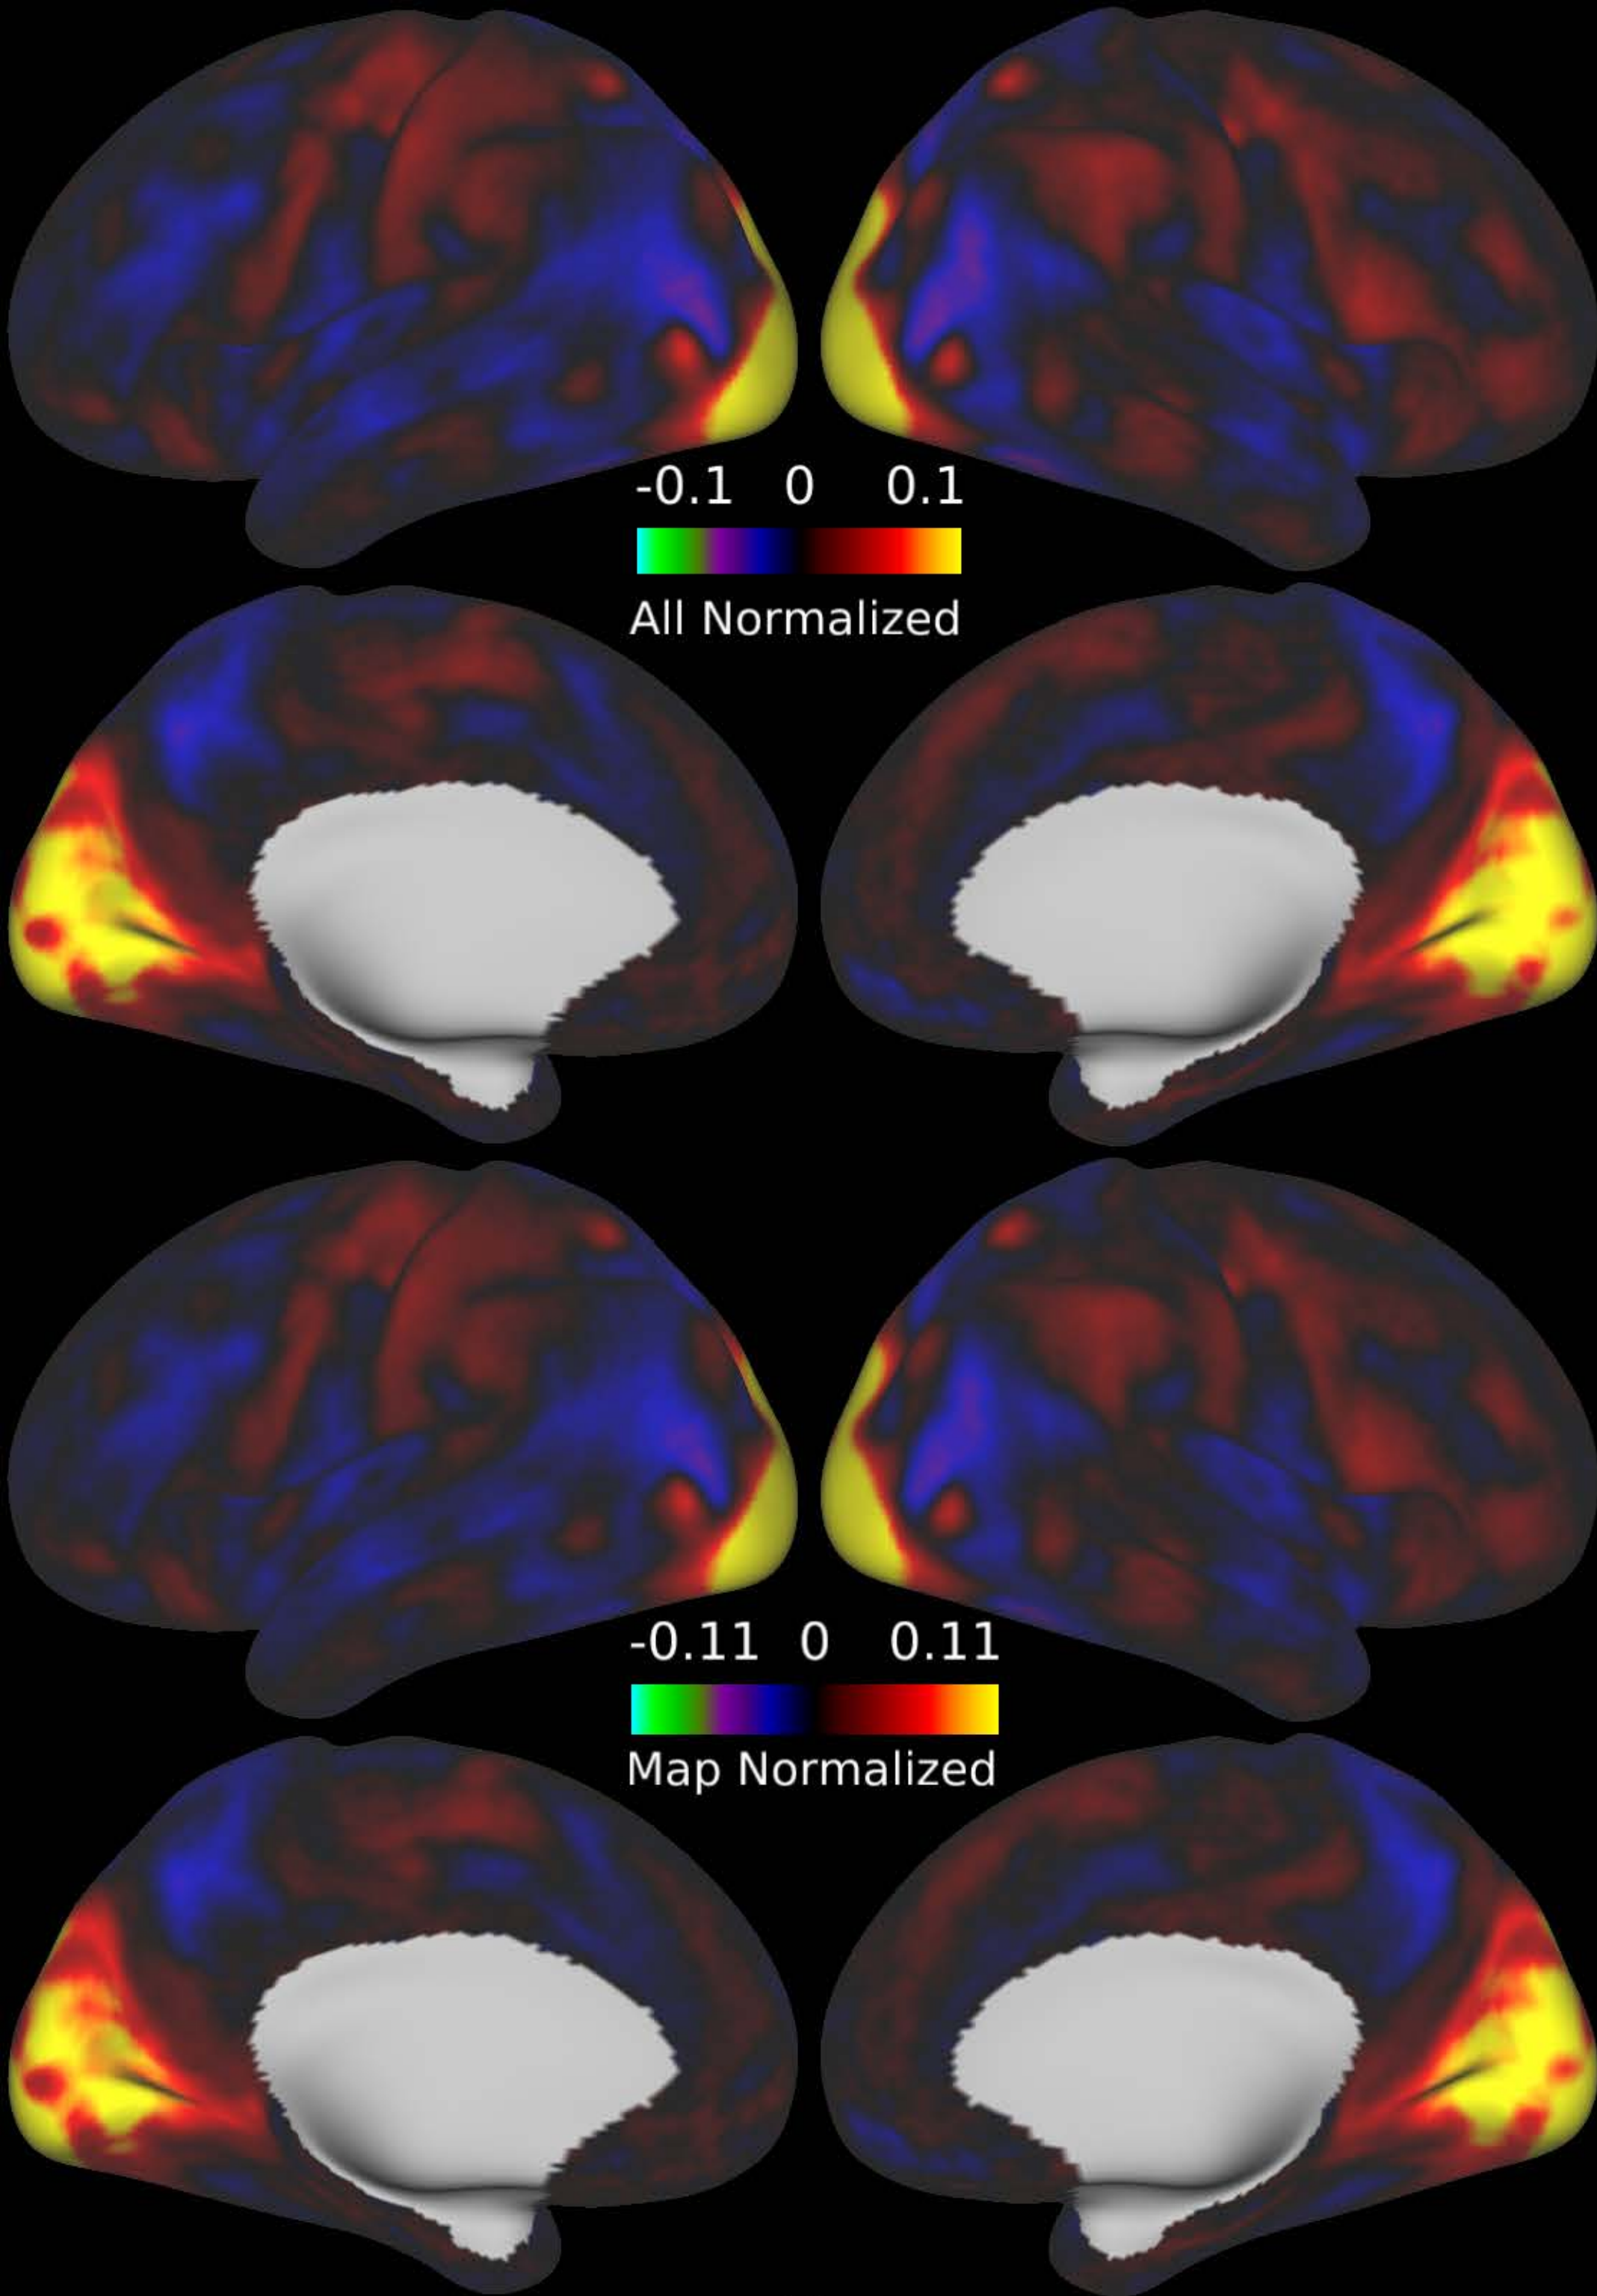

Hertz

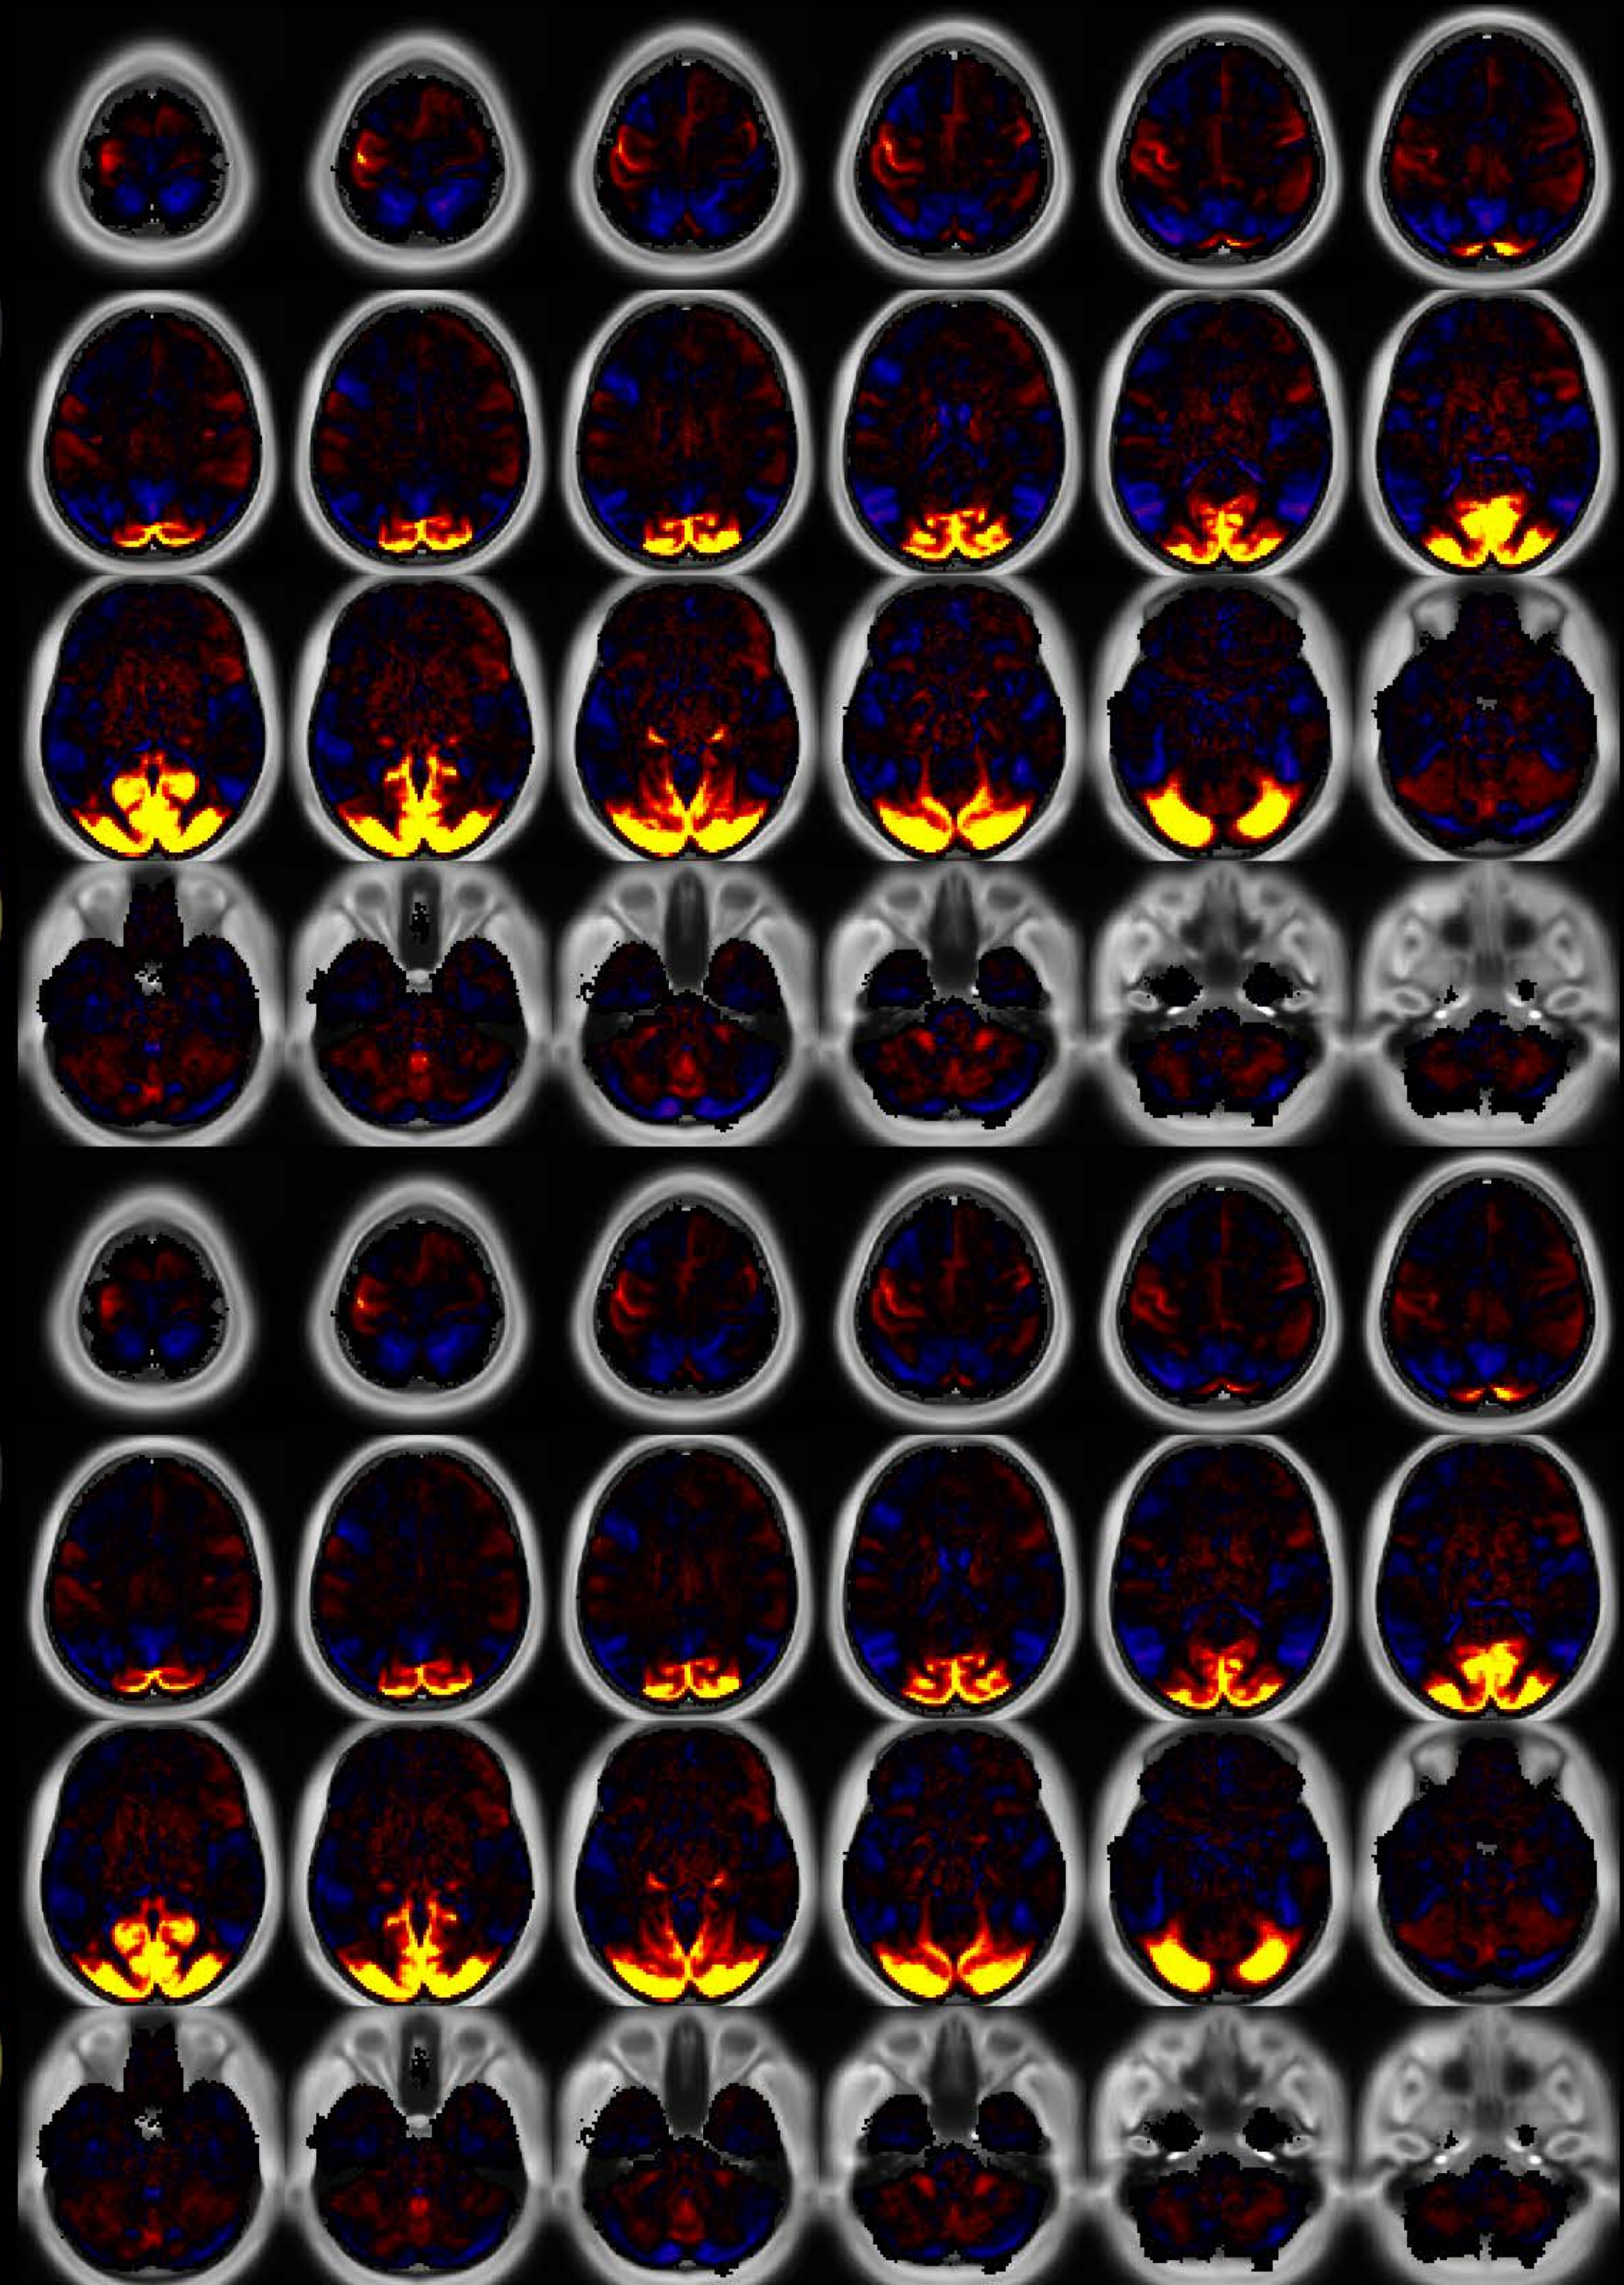

Seconds

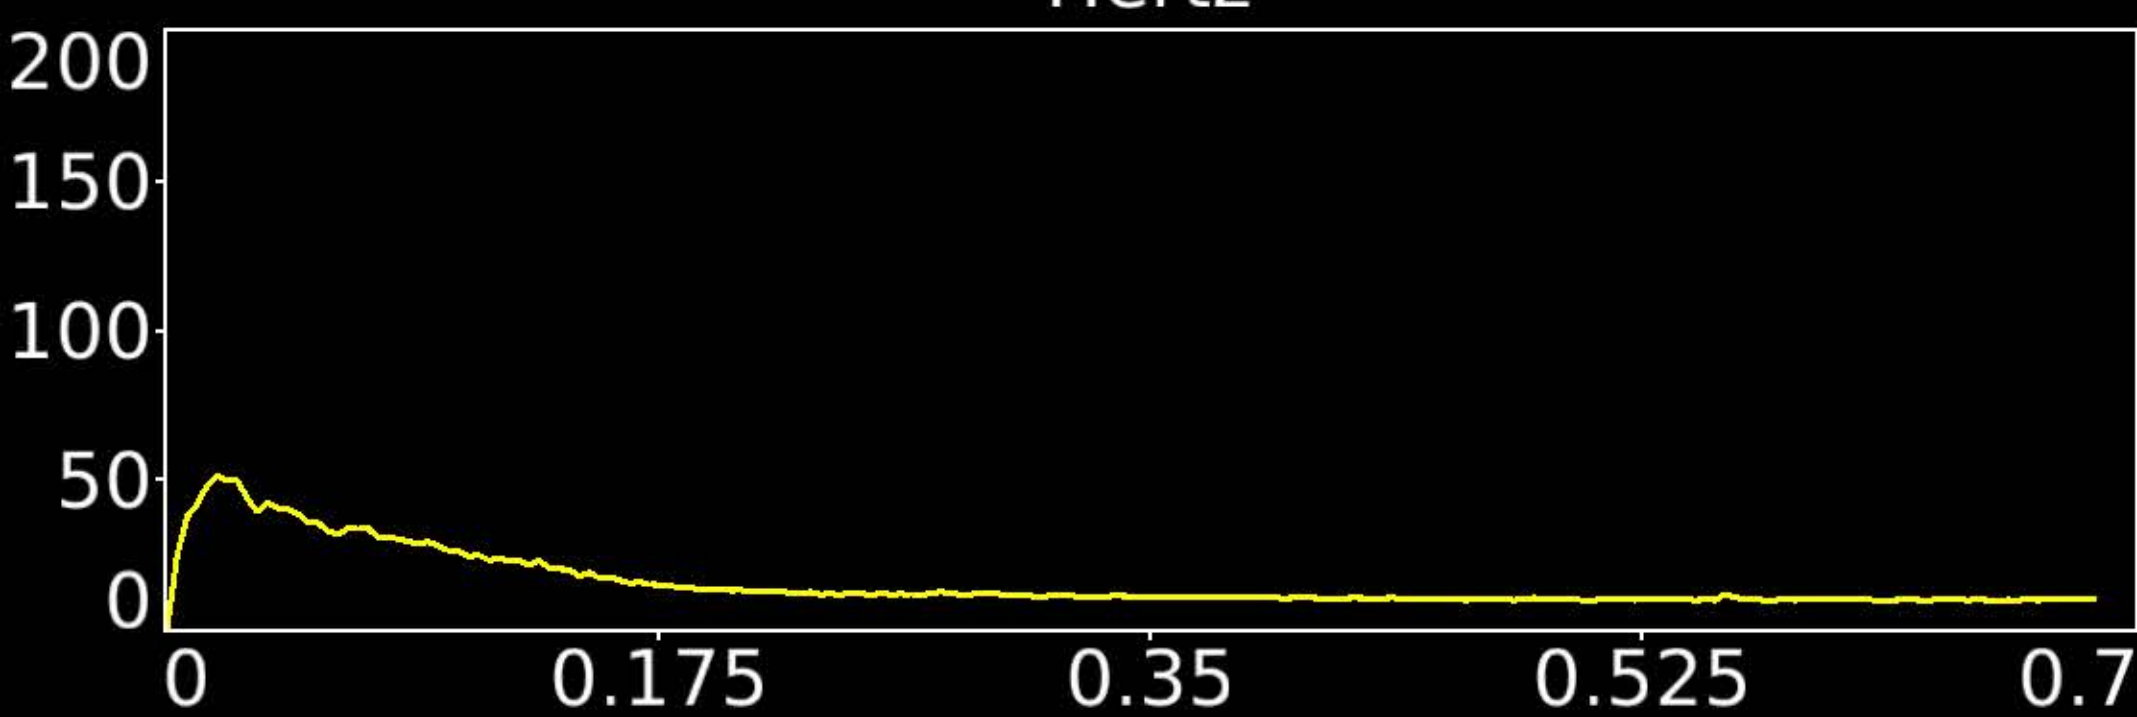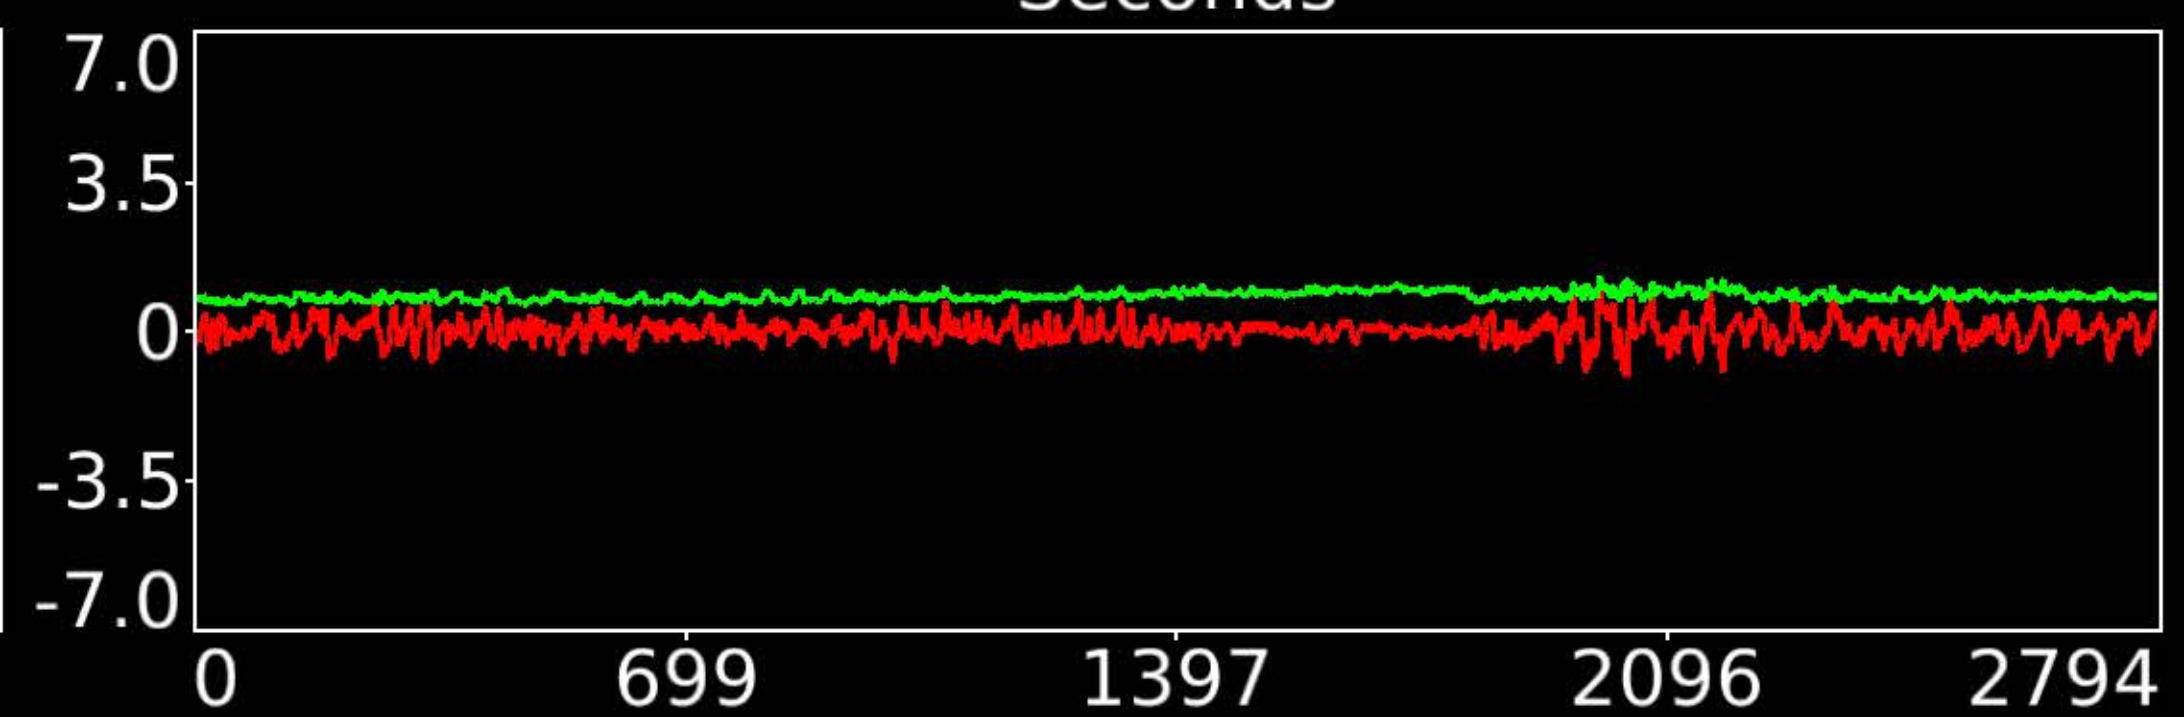

|                           |                            |                            |  |
|---------------------------|----------------------------|----------------------------|--|
| Number & Class: 34 Signal |                            | Name: Early Visual         |  |
| RVT Correlated: No        | DVARS Dip Associated: No   | Cross-Subject Variable: No |  |
| Single Subject: No        | % Variance Explained: 1.18 | Globality Index: 0.64      |  |
| Rest Component: 41        | Taskr Component: 15        | Task Modulated: No         |  |

Rationale: Spatial map includes positive and negative patches that respect known RSNs (e.g. Early Visual)



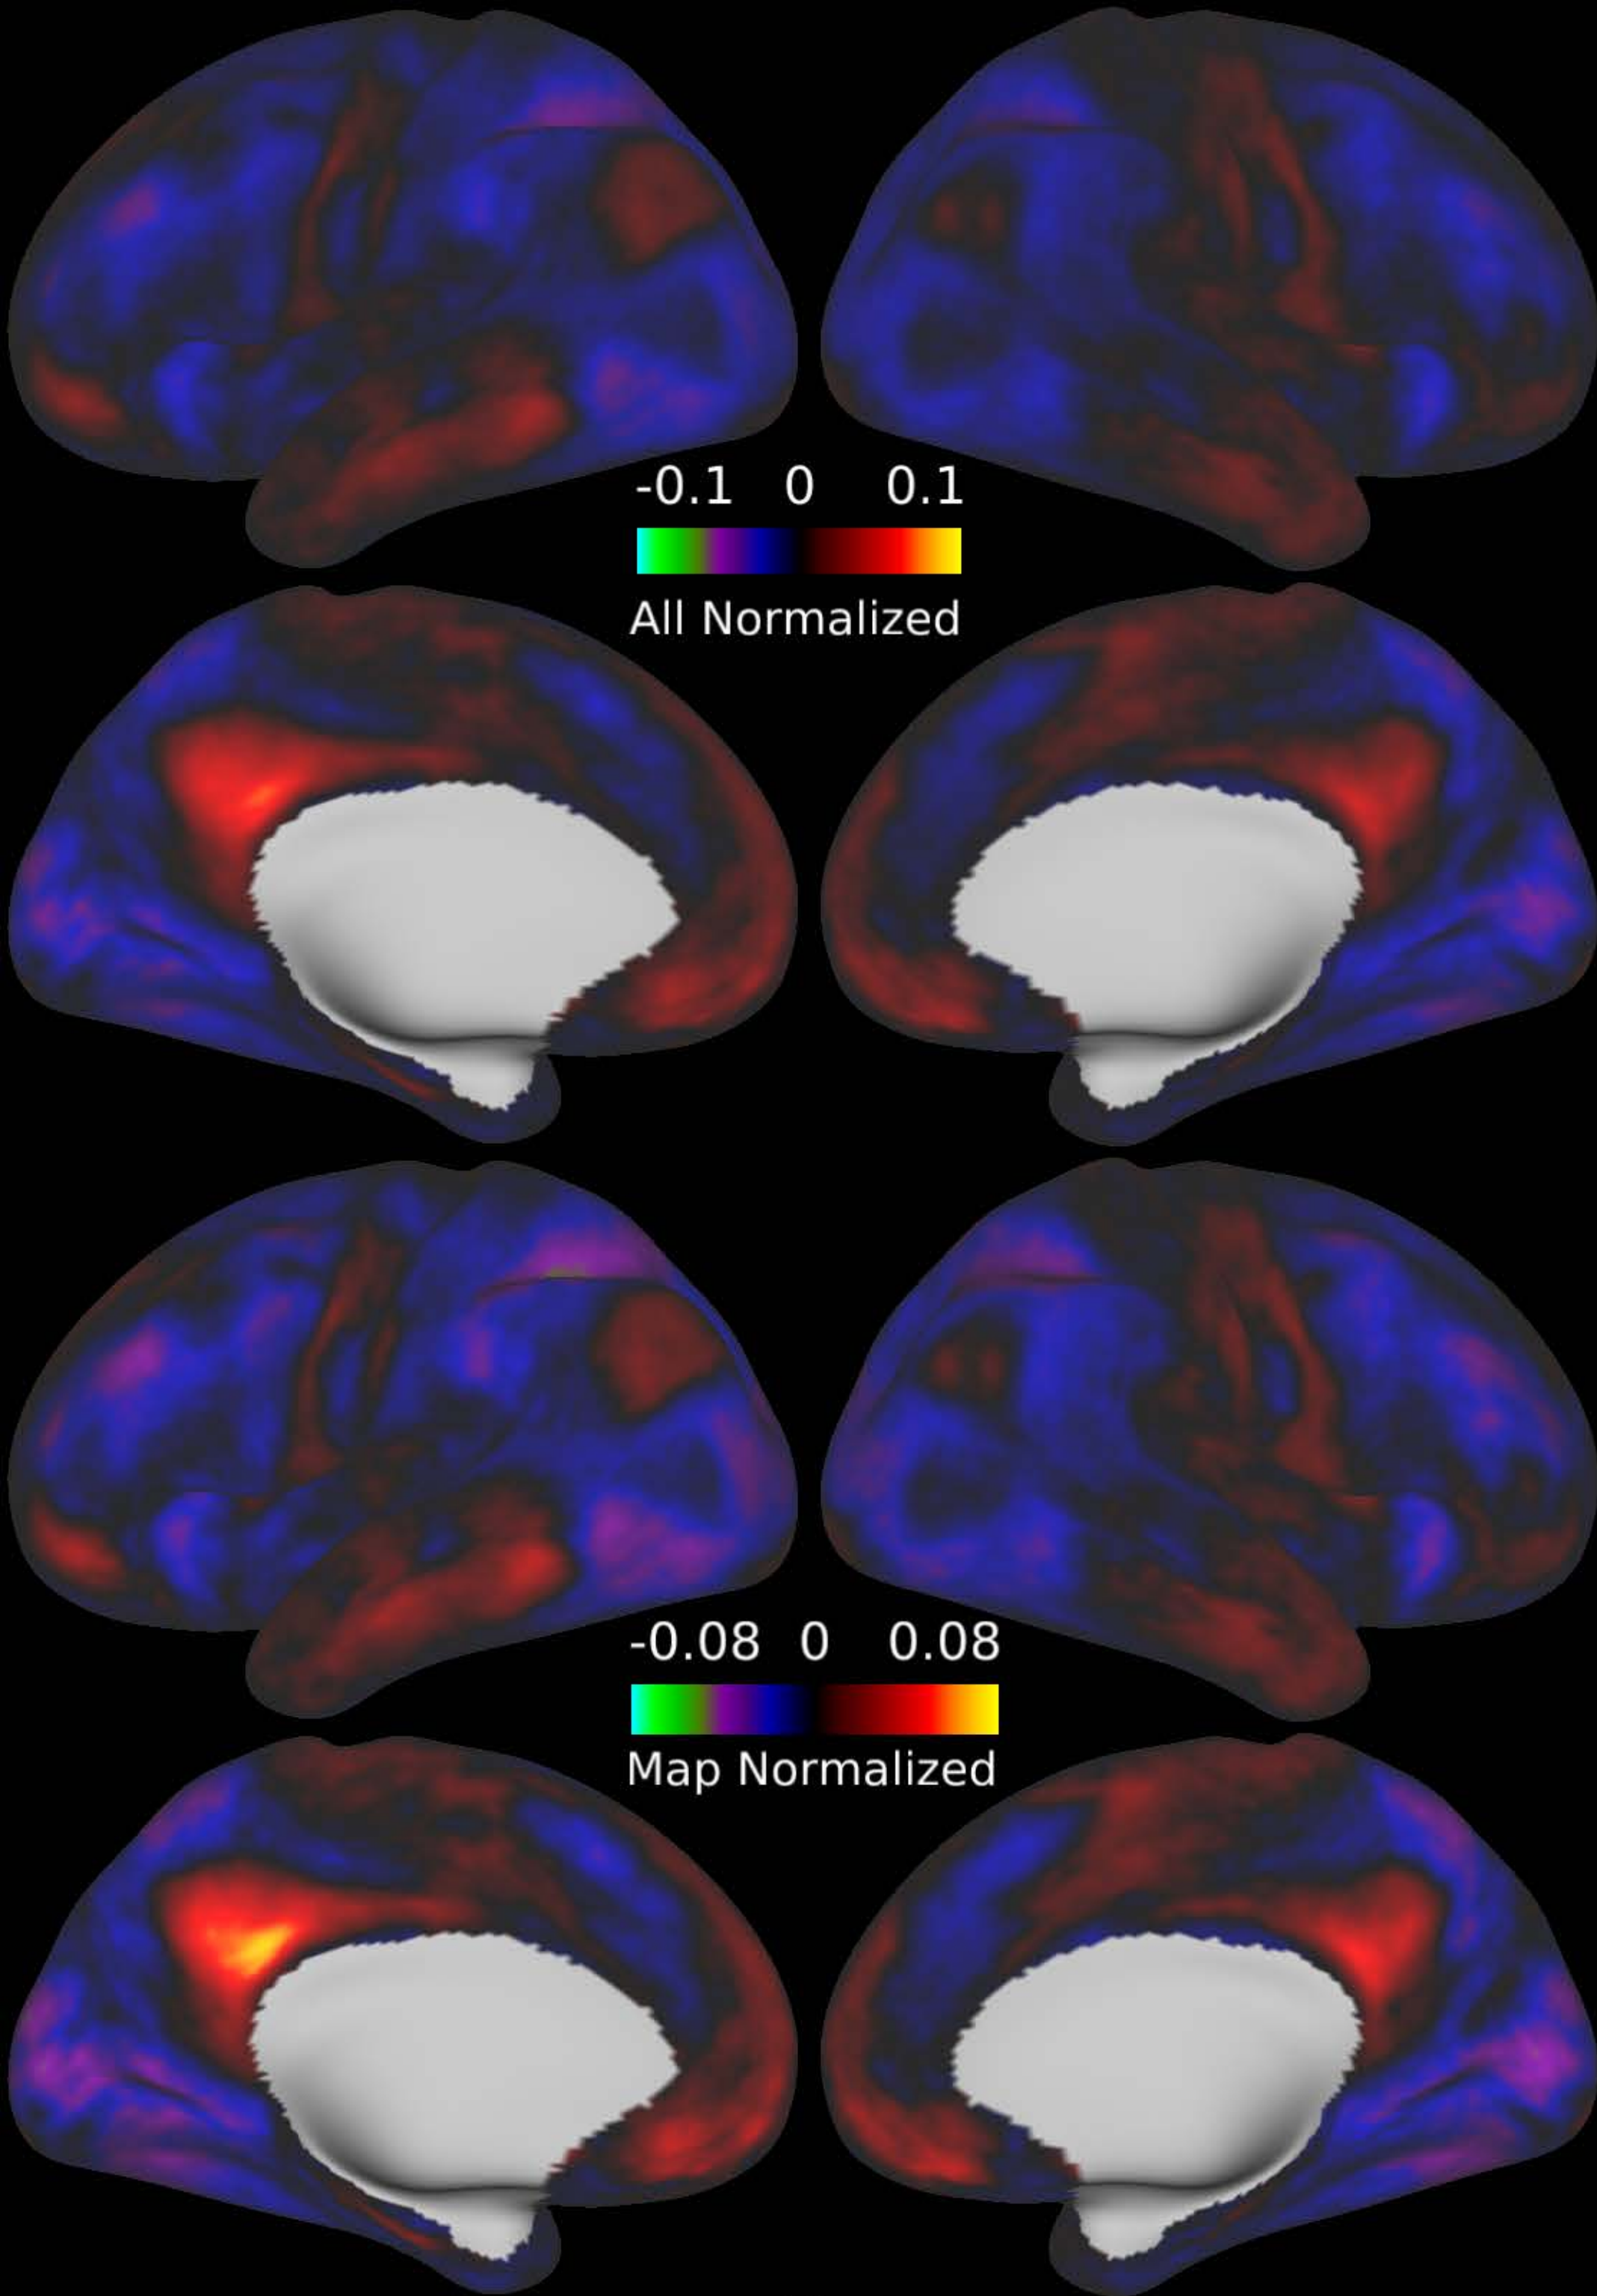

Hertz

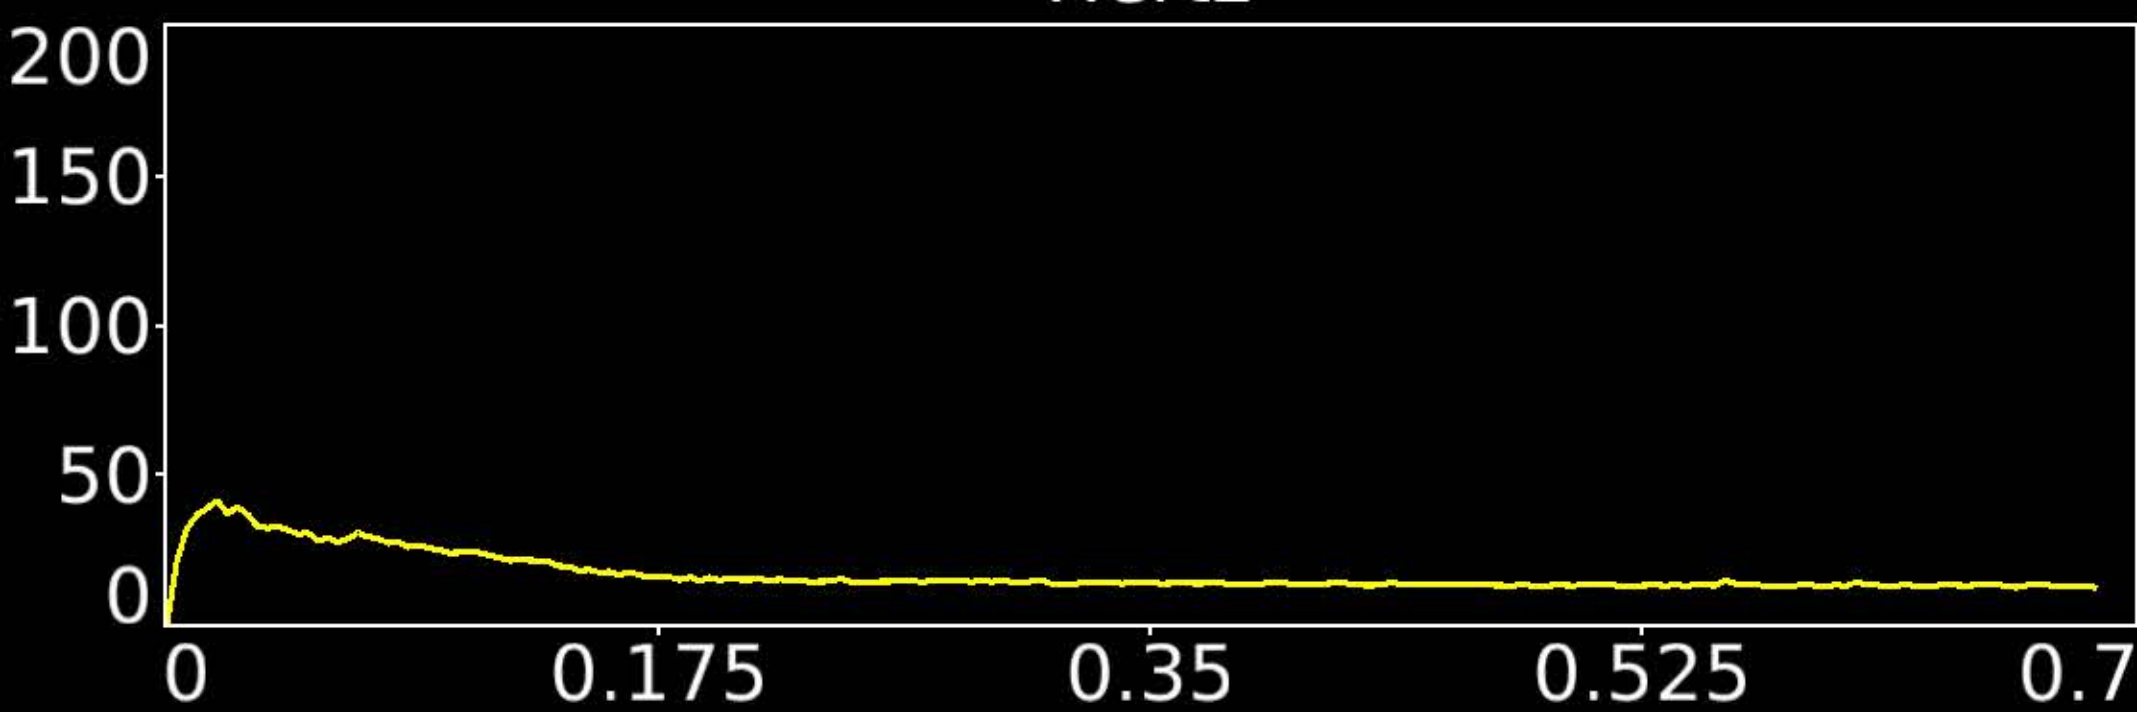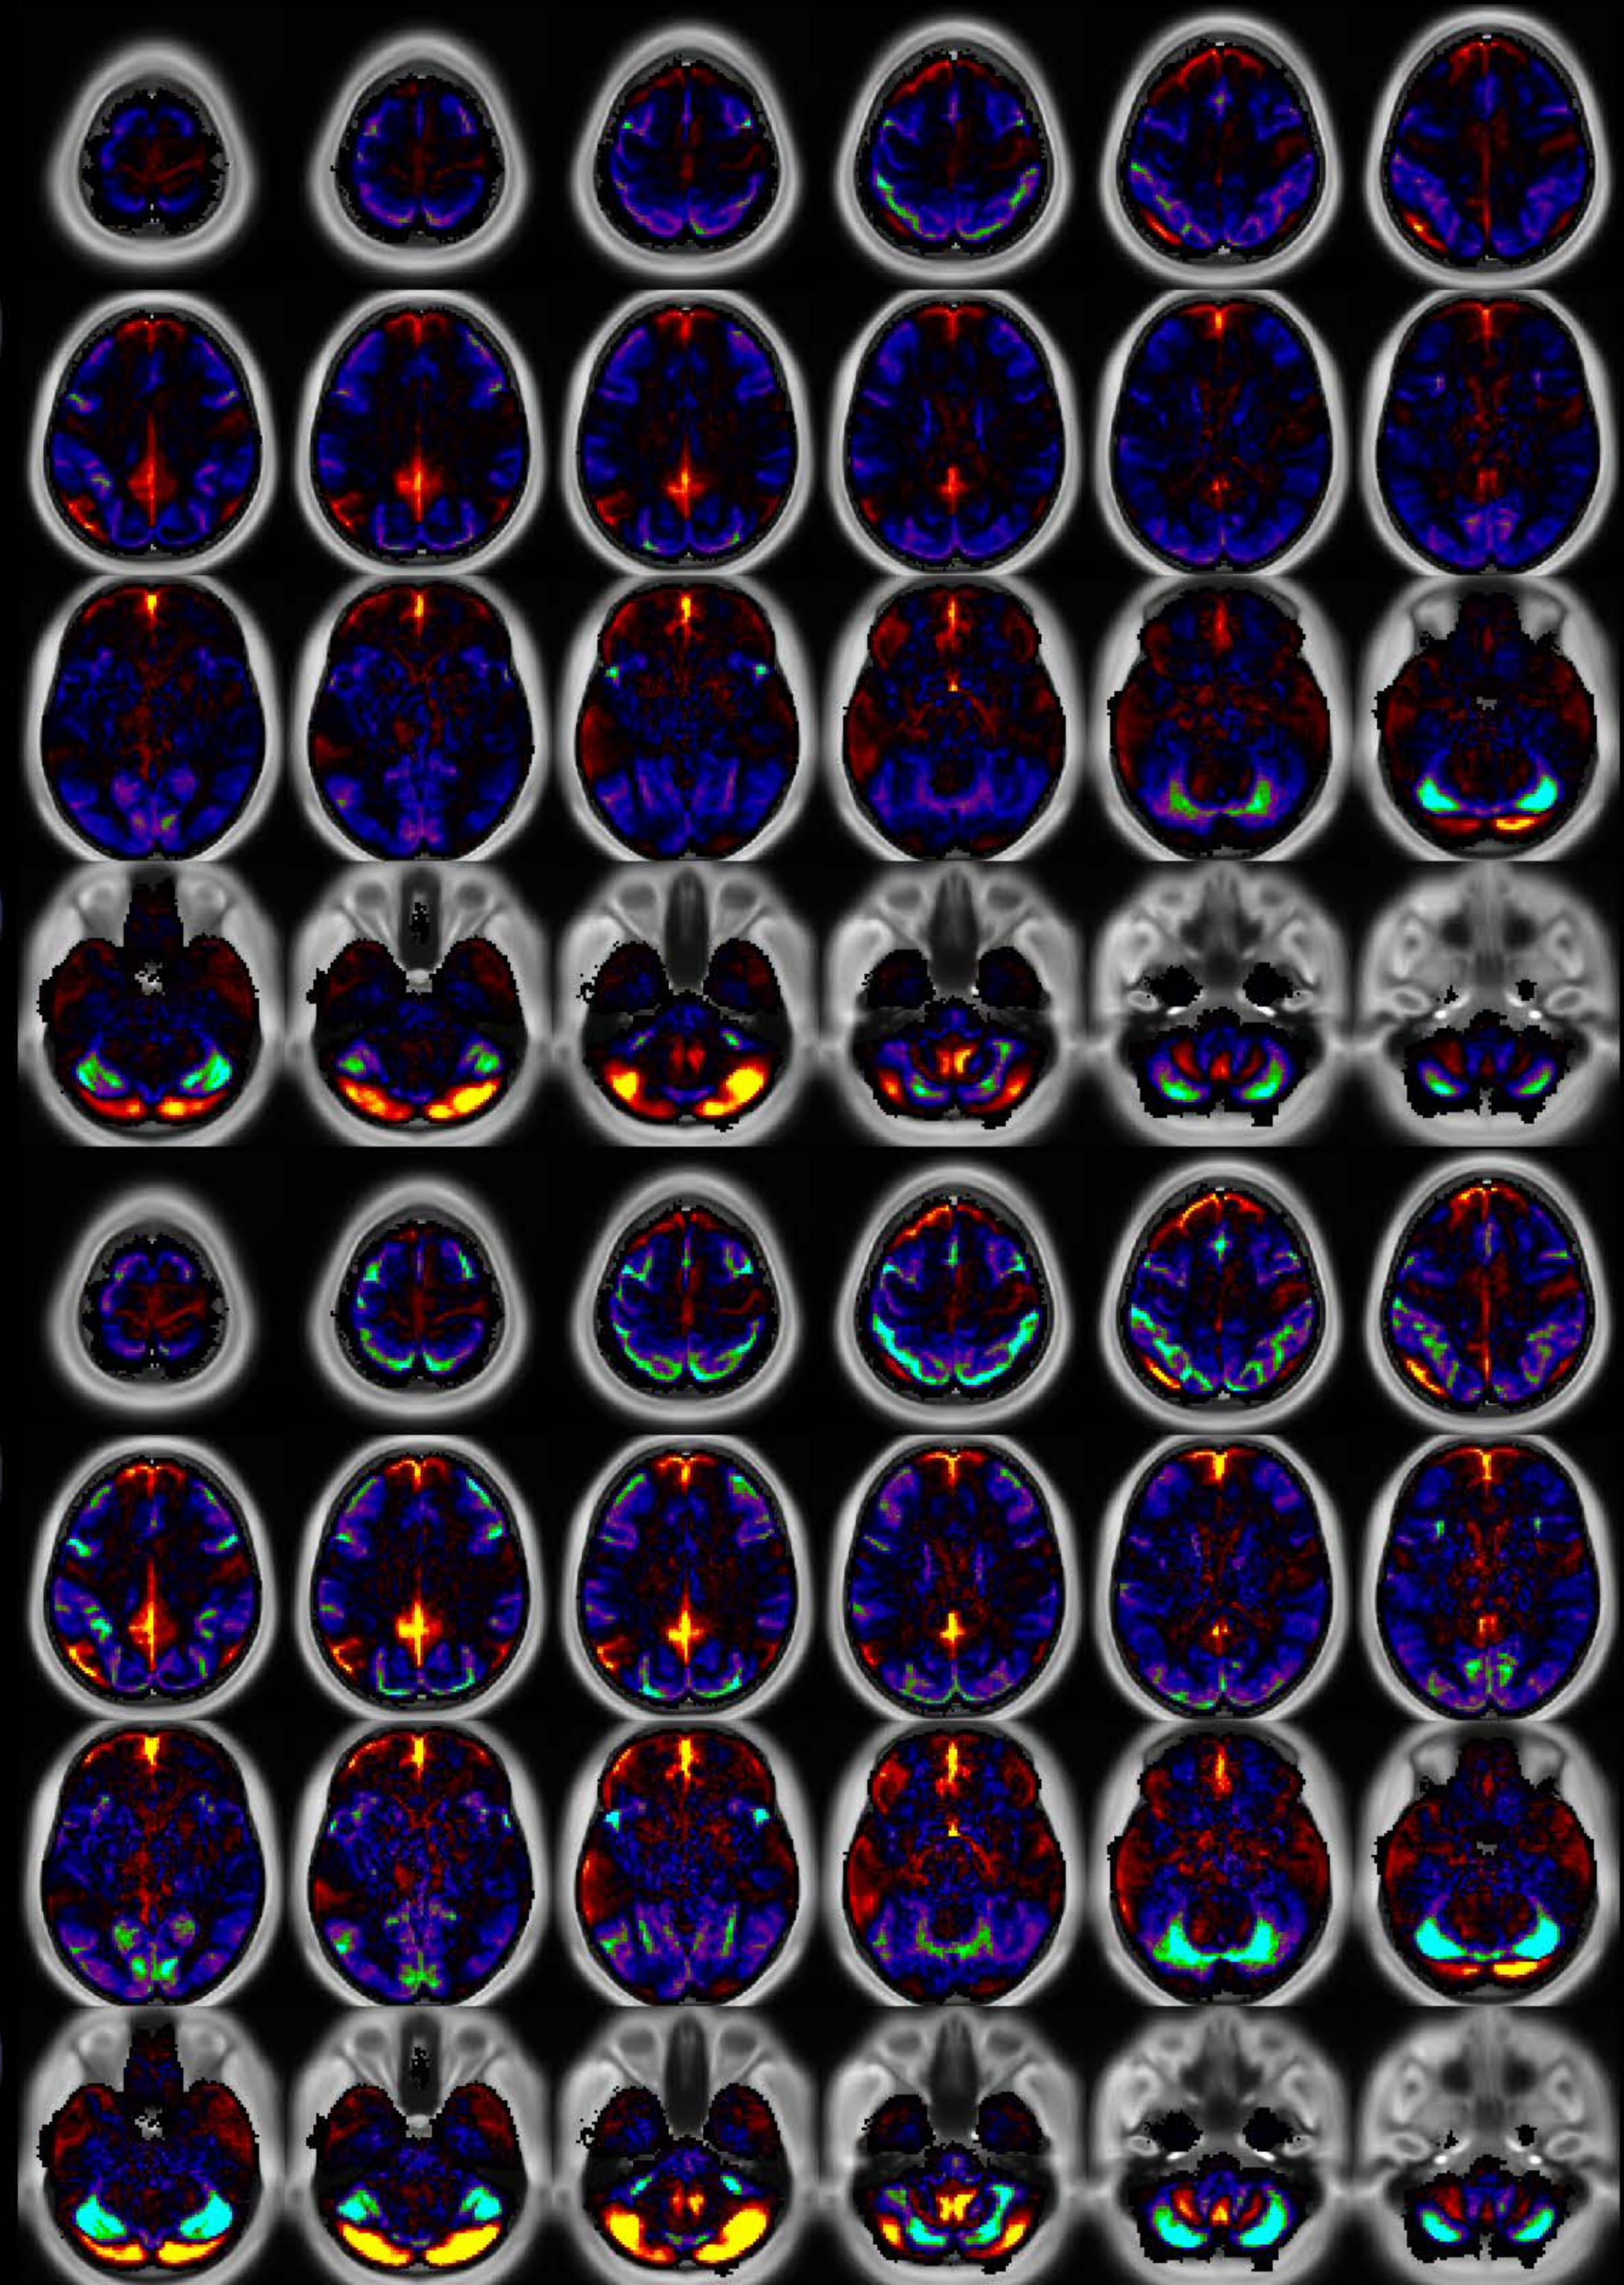

Seconds

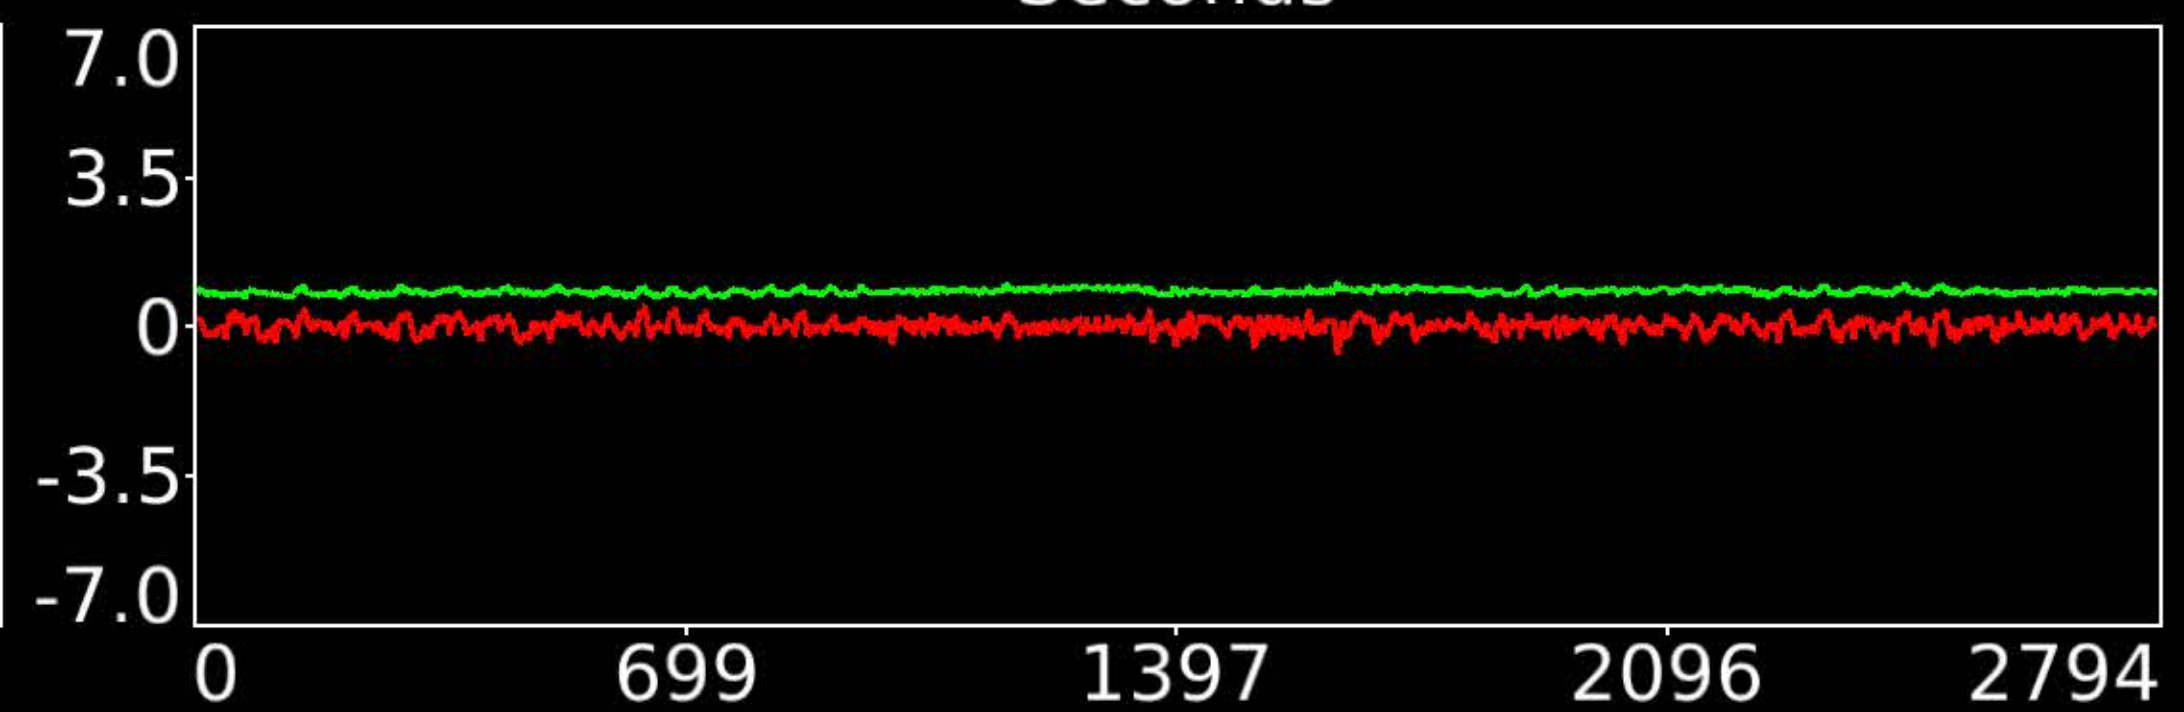

|                           |                            |                            |  |
|---------------------------|----------------------------|----------------------------|--|
| Number & Class: 35 Signal |                            | Name: Cerebellar Unknown   |  |
| RVT Correlated: No        | DVARS Dip Associated: No   | Cross-Subject Variable: No |  |
| Single Subject: No        | % Variance Explained: 1.11 | Globality Index: 0.94      |  |
| Rest Component: No        | Taskr Component: 25        | Task Modulated: No         |  |

Rationale: Spatial map includes positive and negative patches that respect known RSN boundaries in the cerebellum



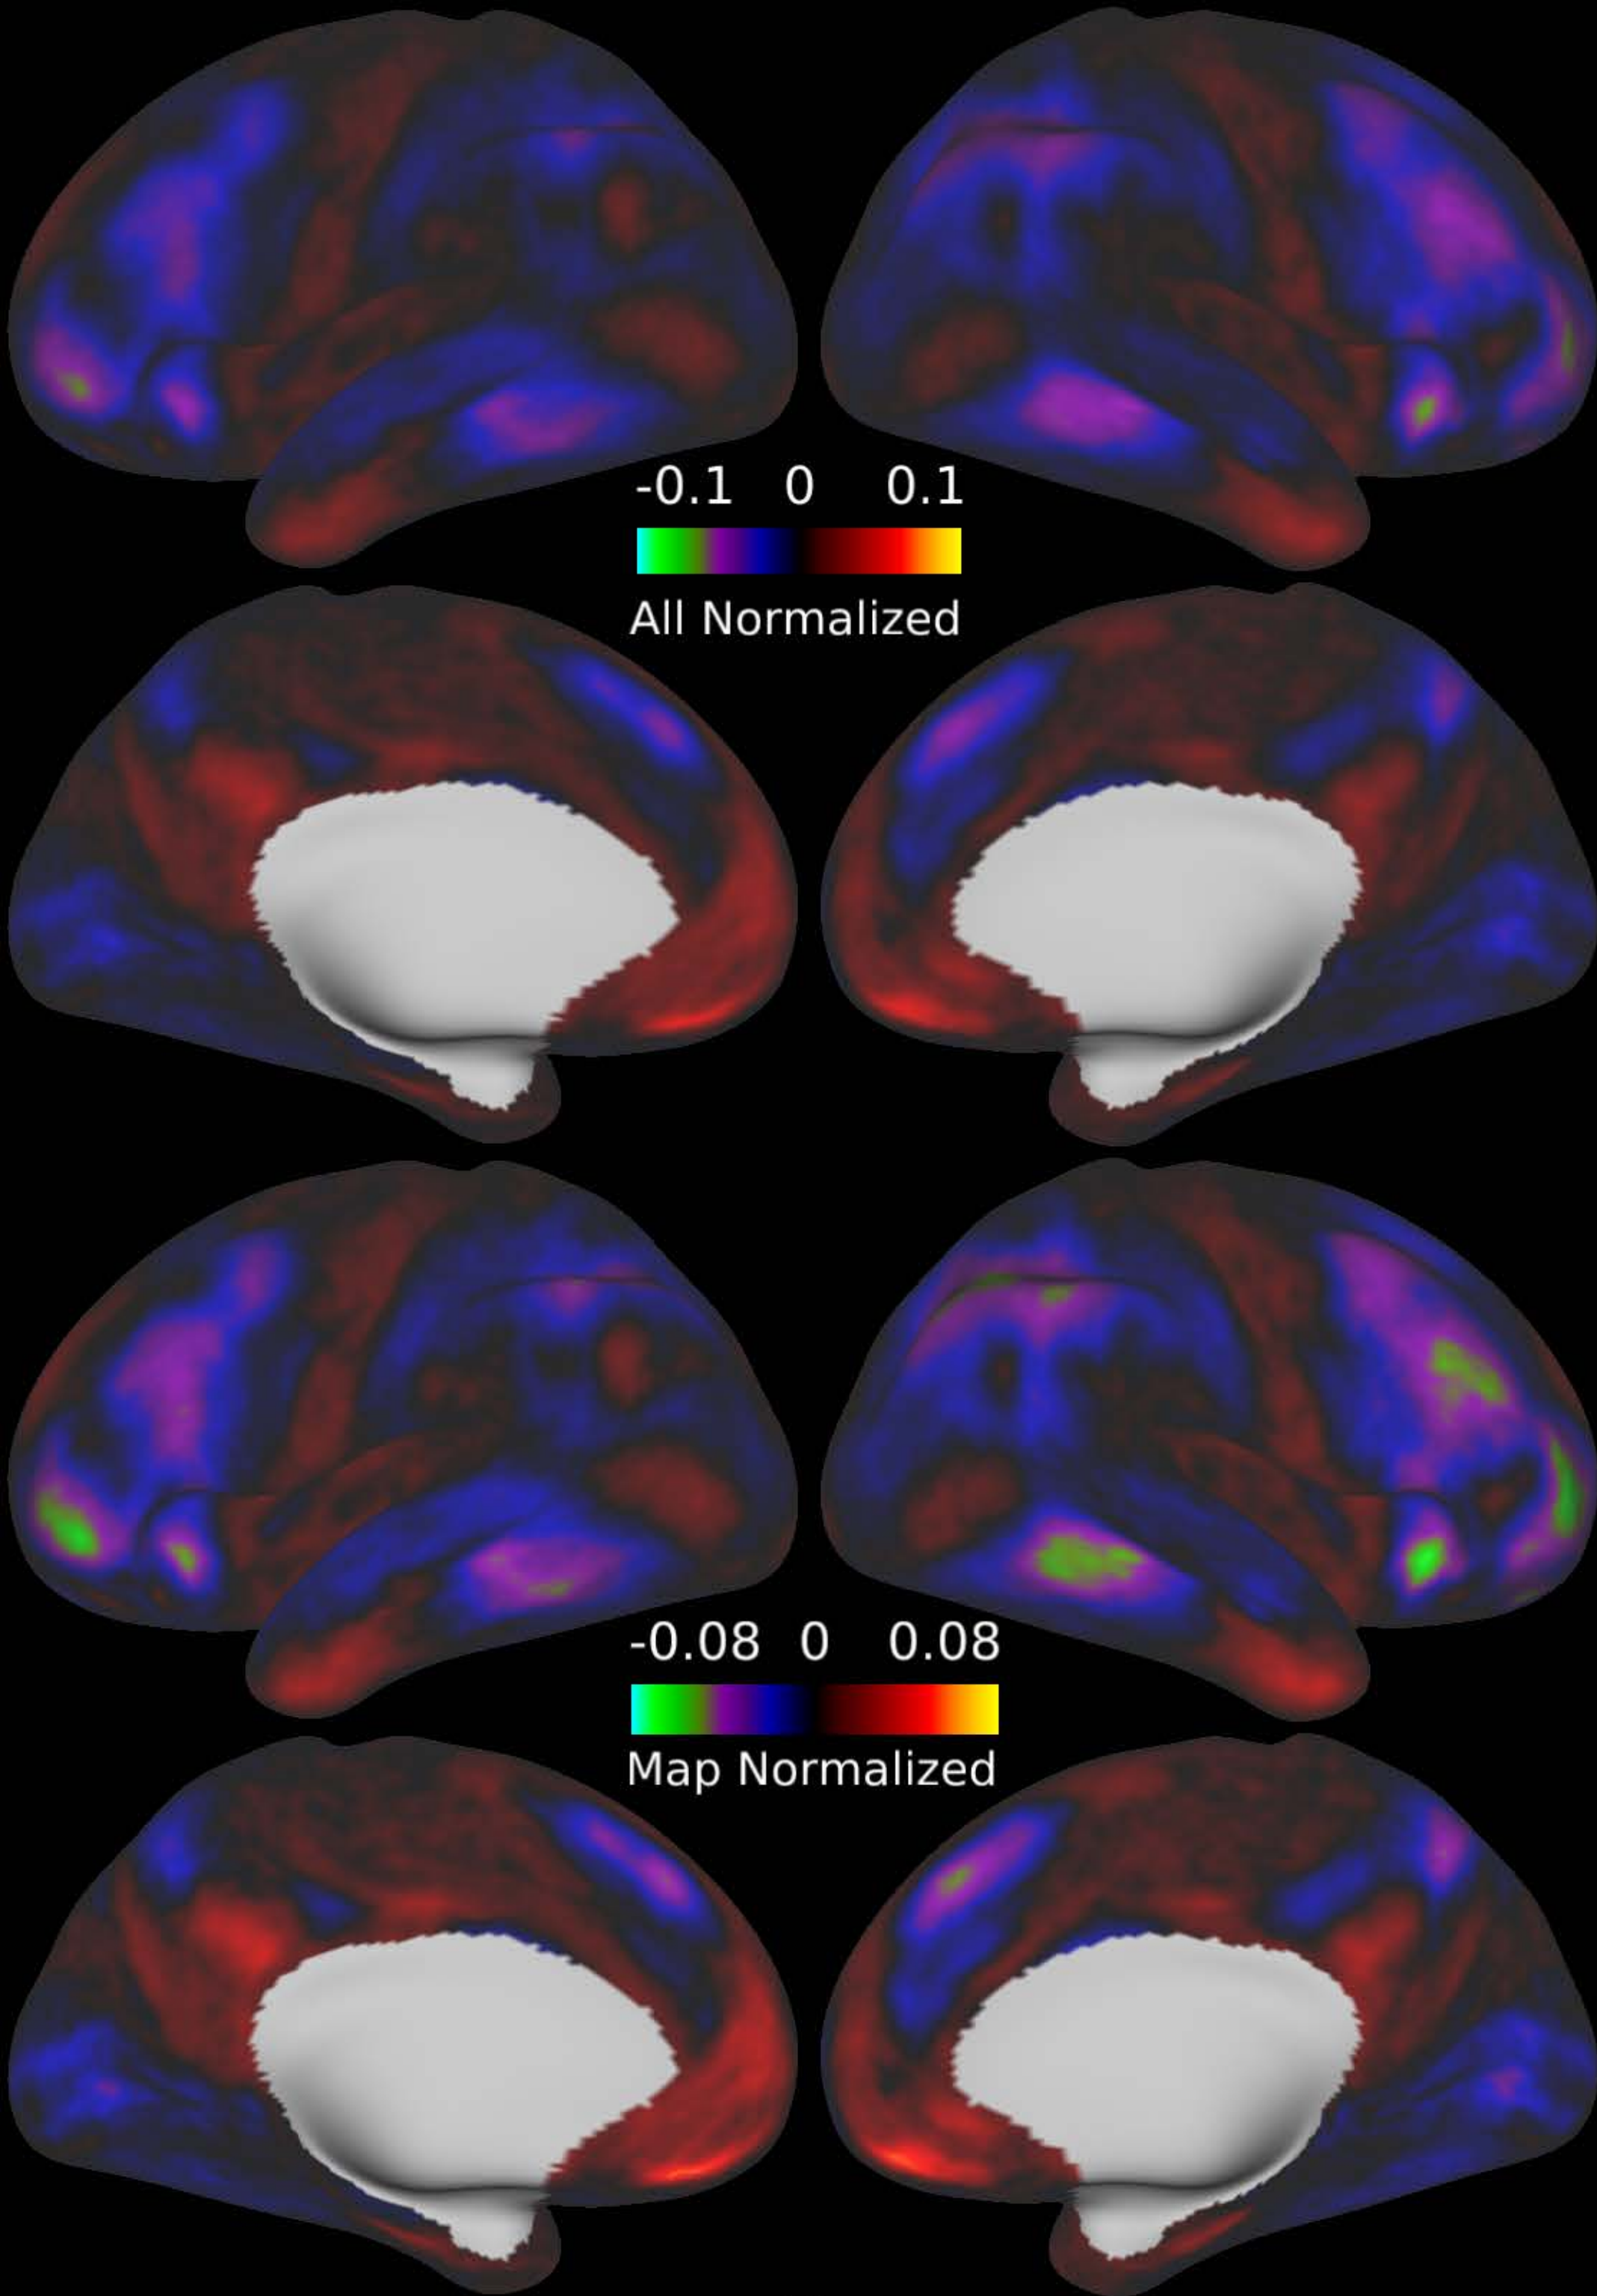

Hertz

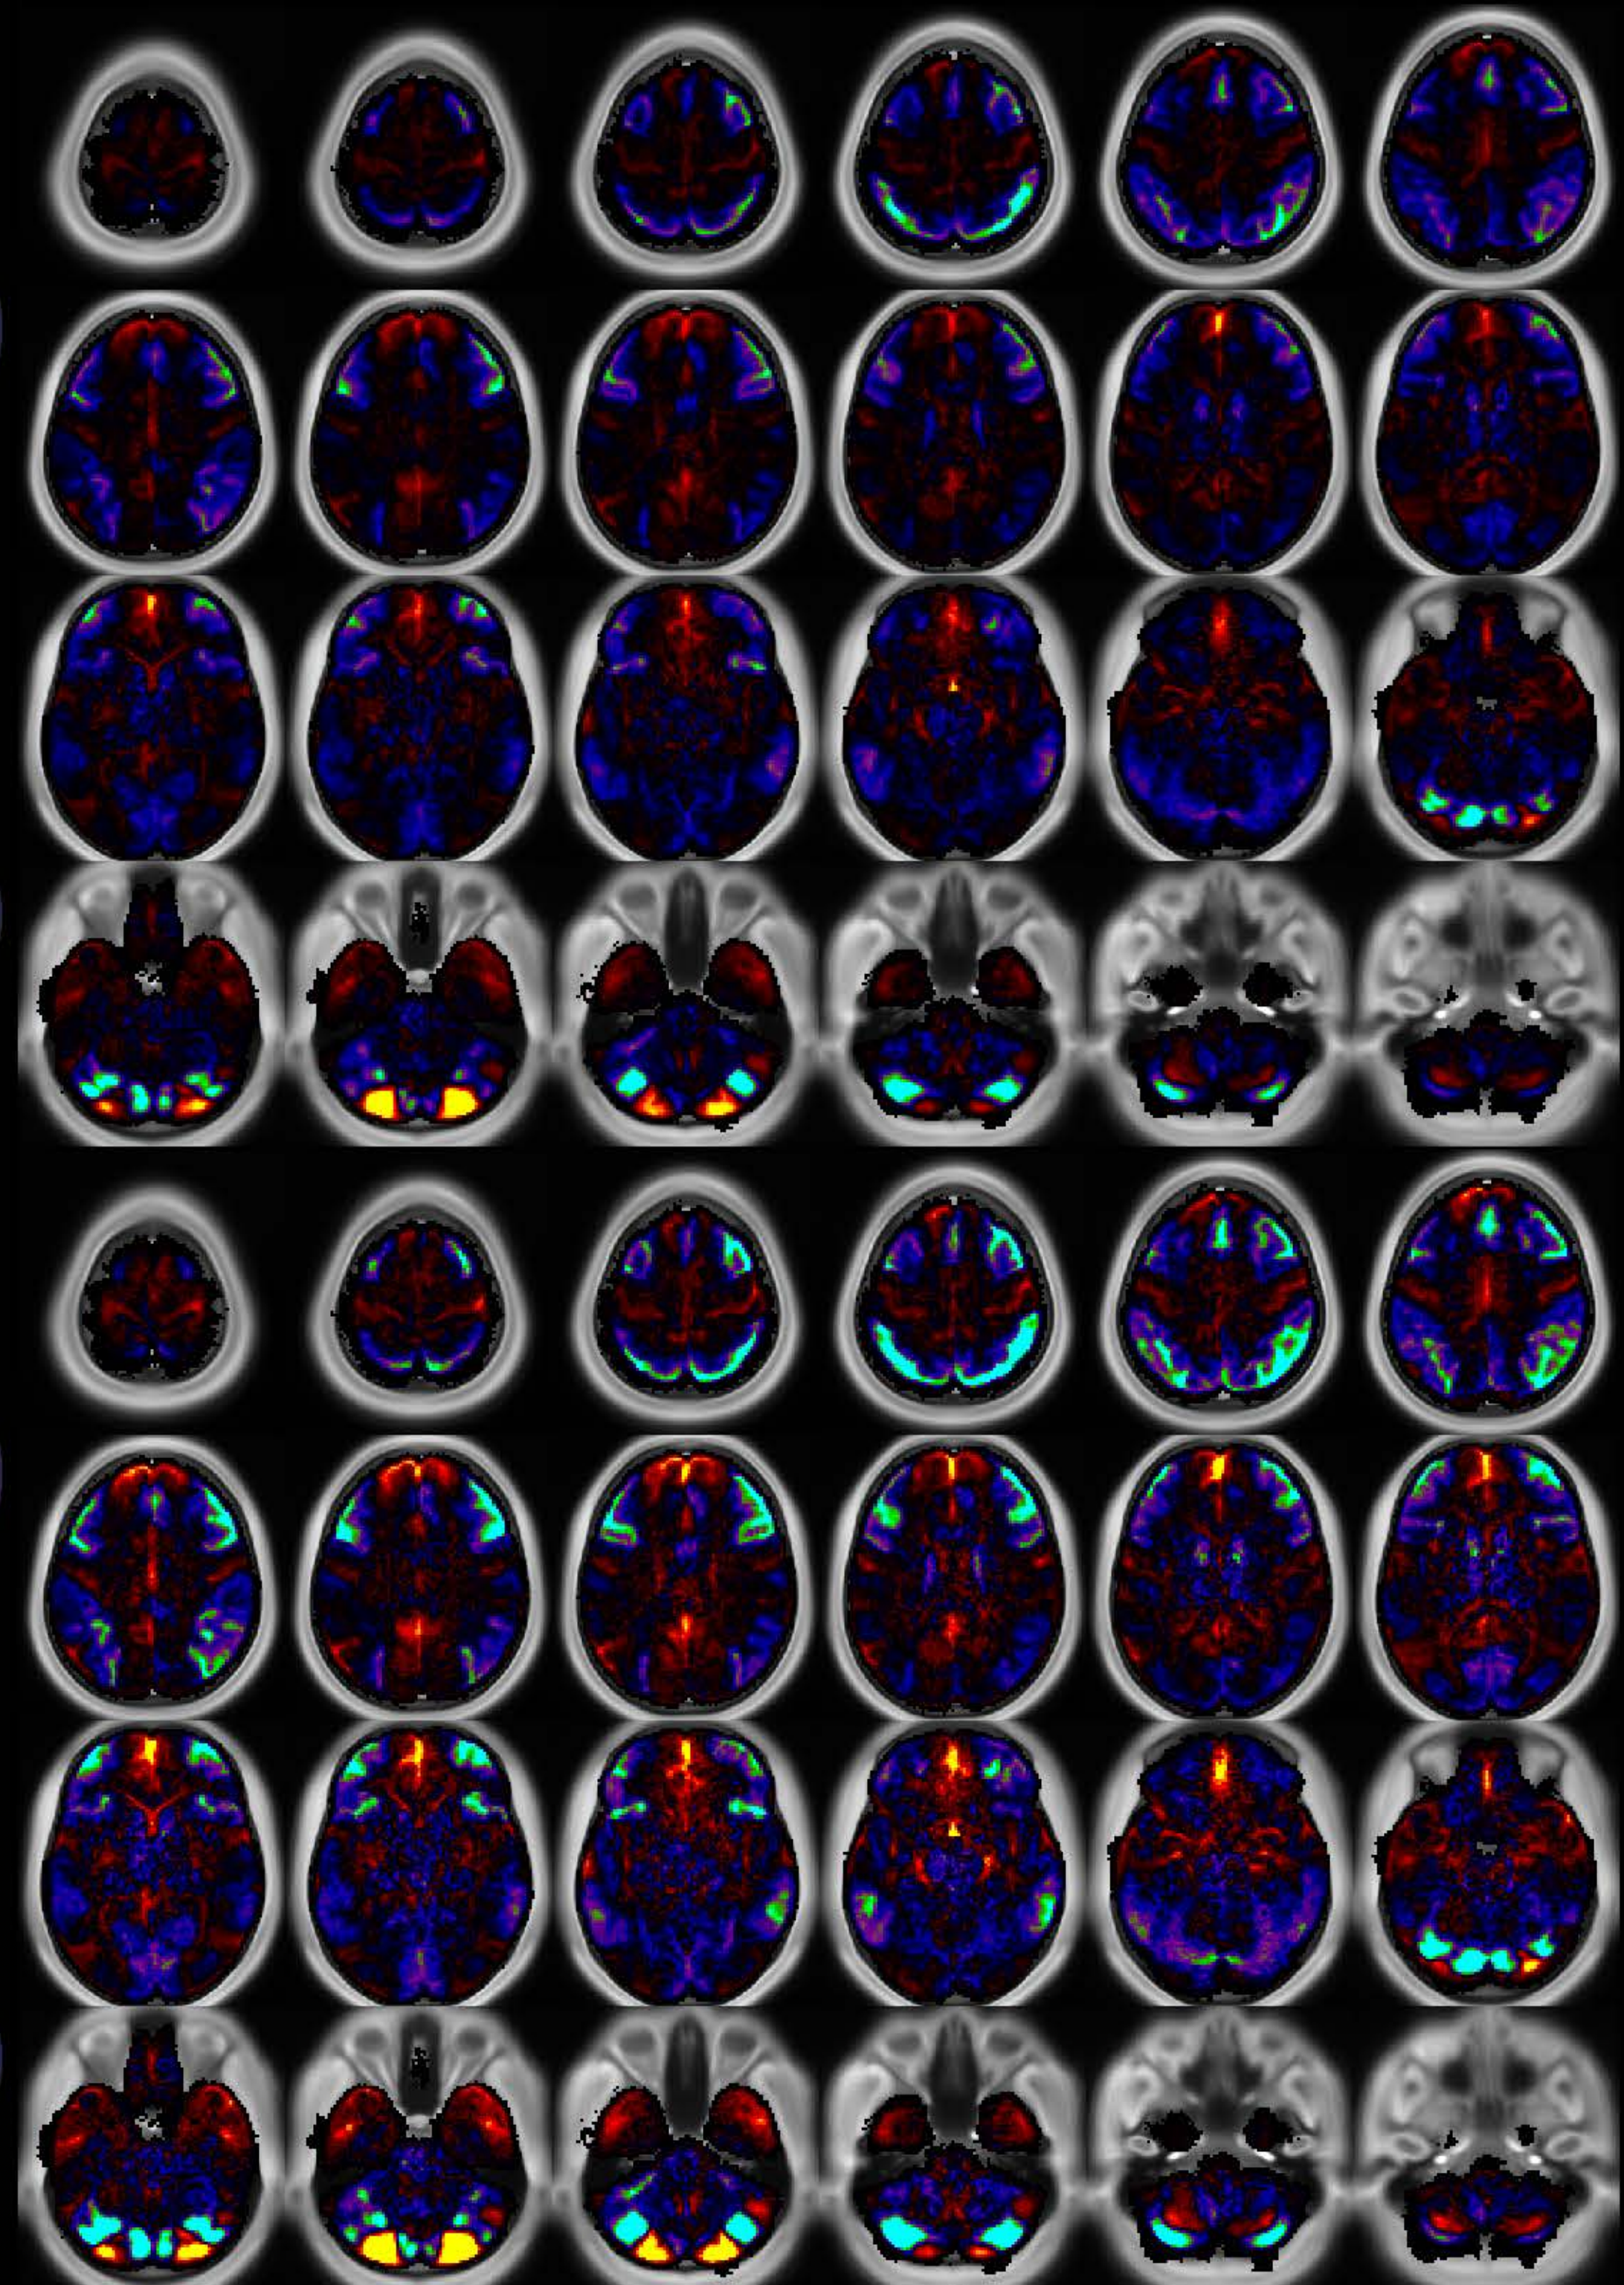

Seconds

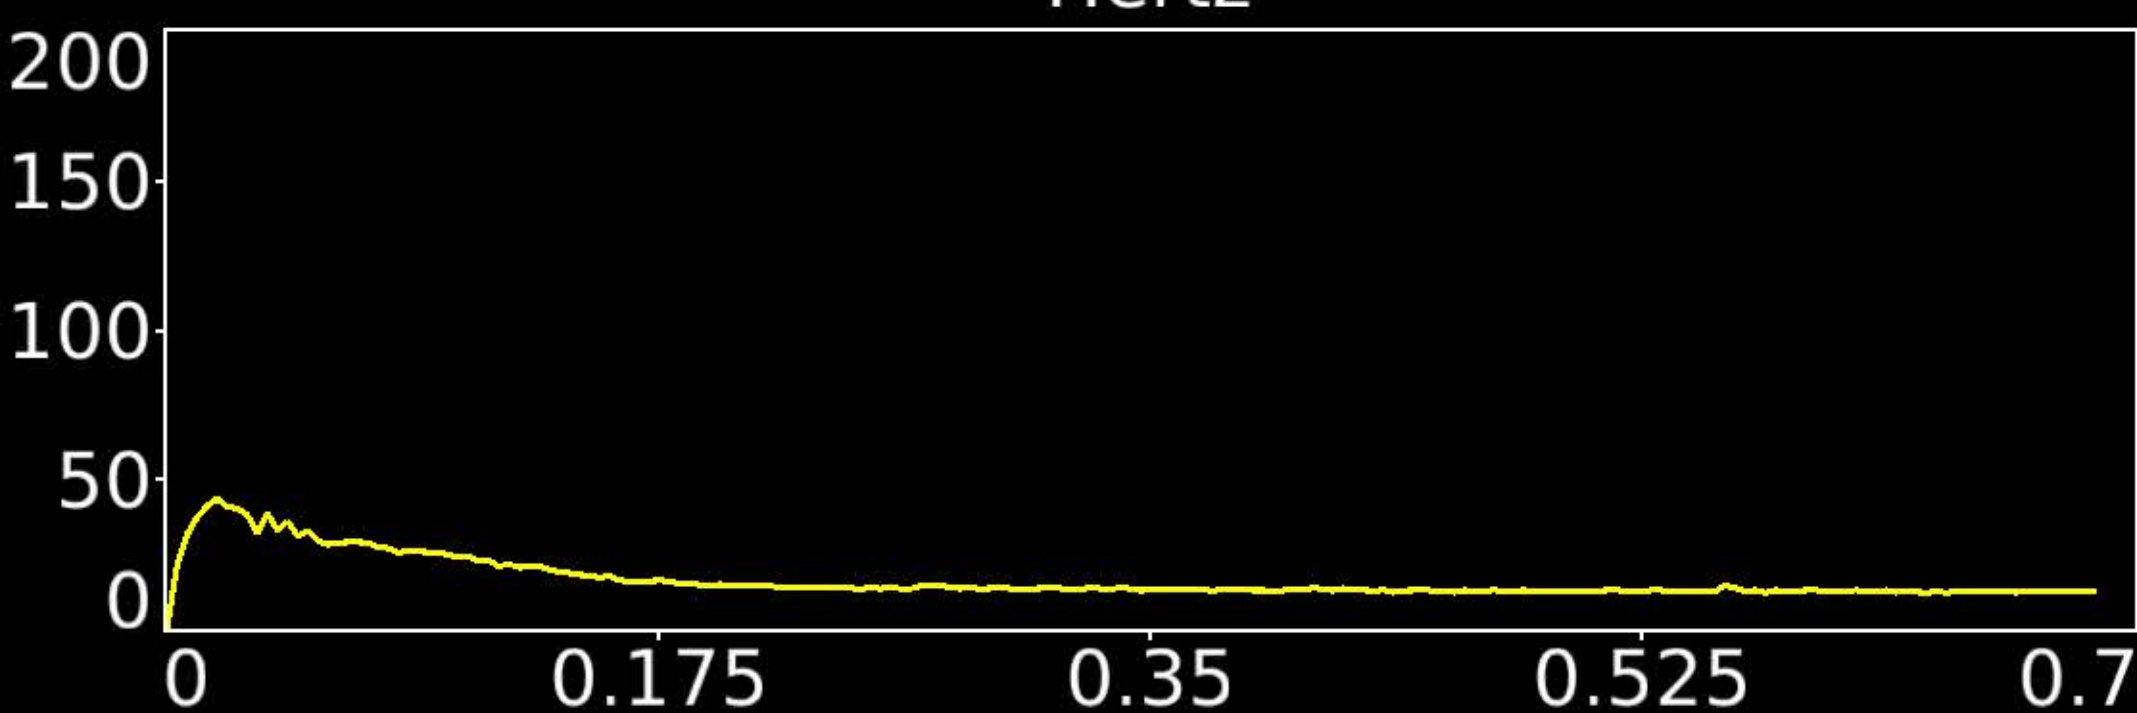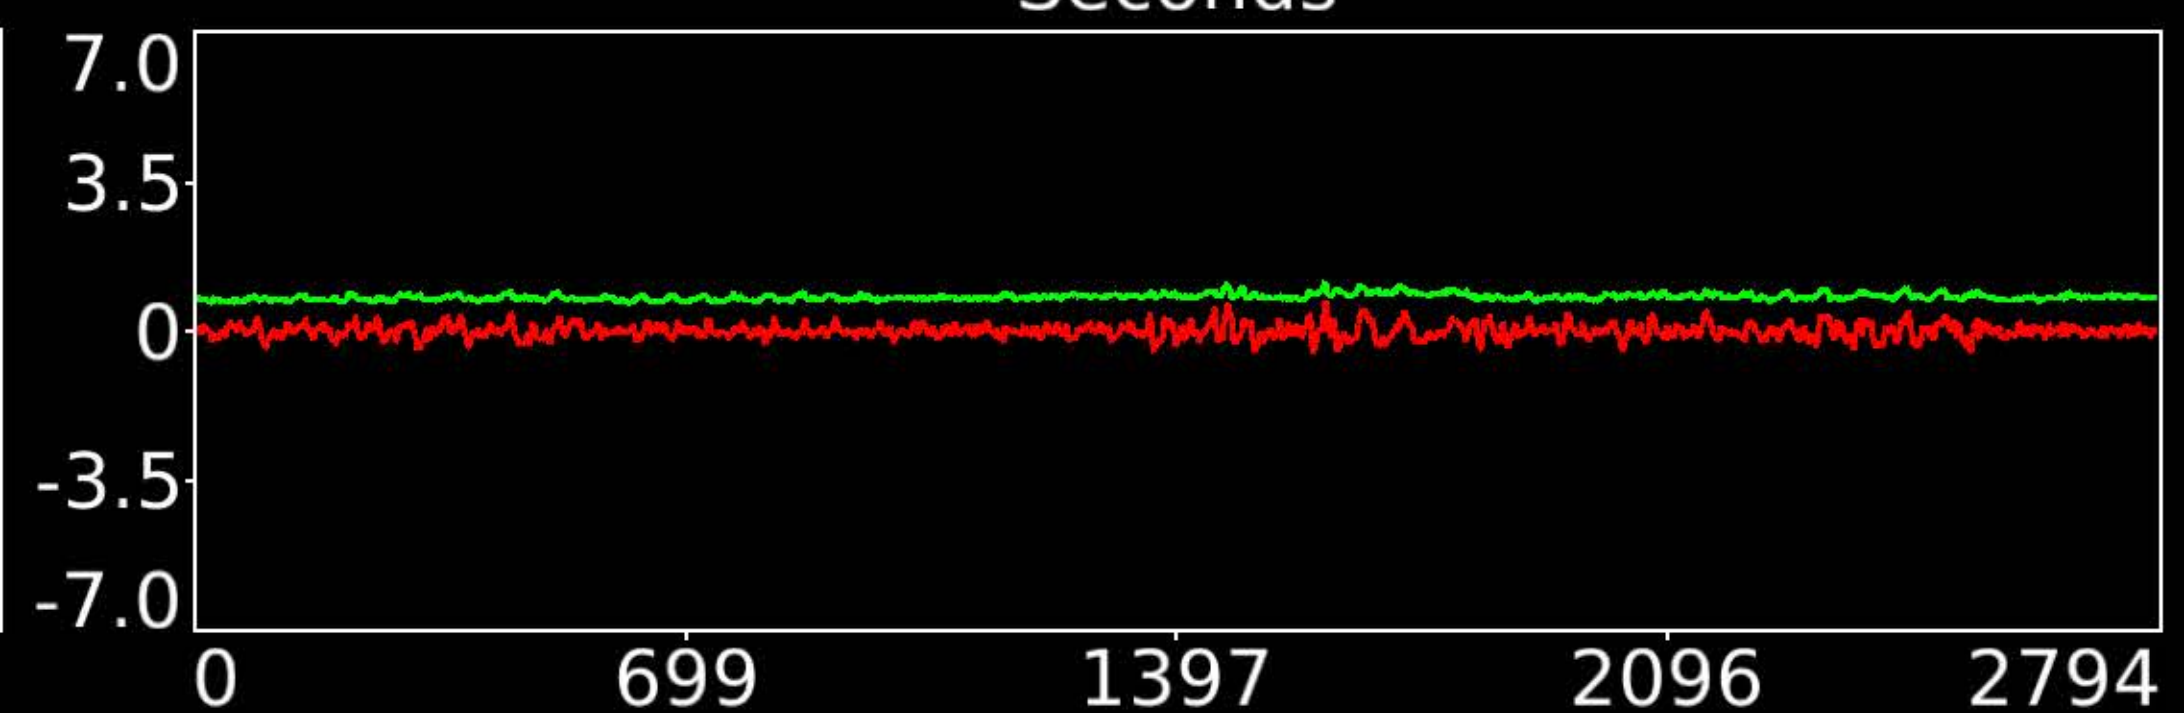

|                           |                            |                            |  |
|---------------------------|----------------------------|----------------------------|--|
| Number & Class: 36 Signal |                            | Name: Cerebellar Unknown   |  |
| RVT Correlated: No        | DVARS Dip Associated: No   | Cross-Subject Variable: No |  |
| Single Subject: No        | % Variance Explained: 1.08 | Globality Index: 0.56      |  |
| Rest Component: 20        | Taskr Component: -32       | Task Modulated: No         |  |

Rationale: Spatial map includes positive and negative patches that respect known RSN boundaries in the cerebellum



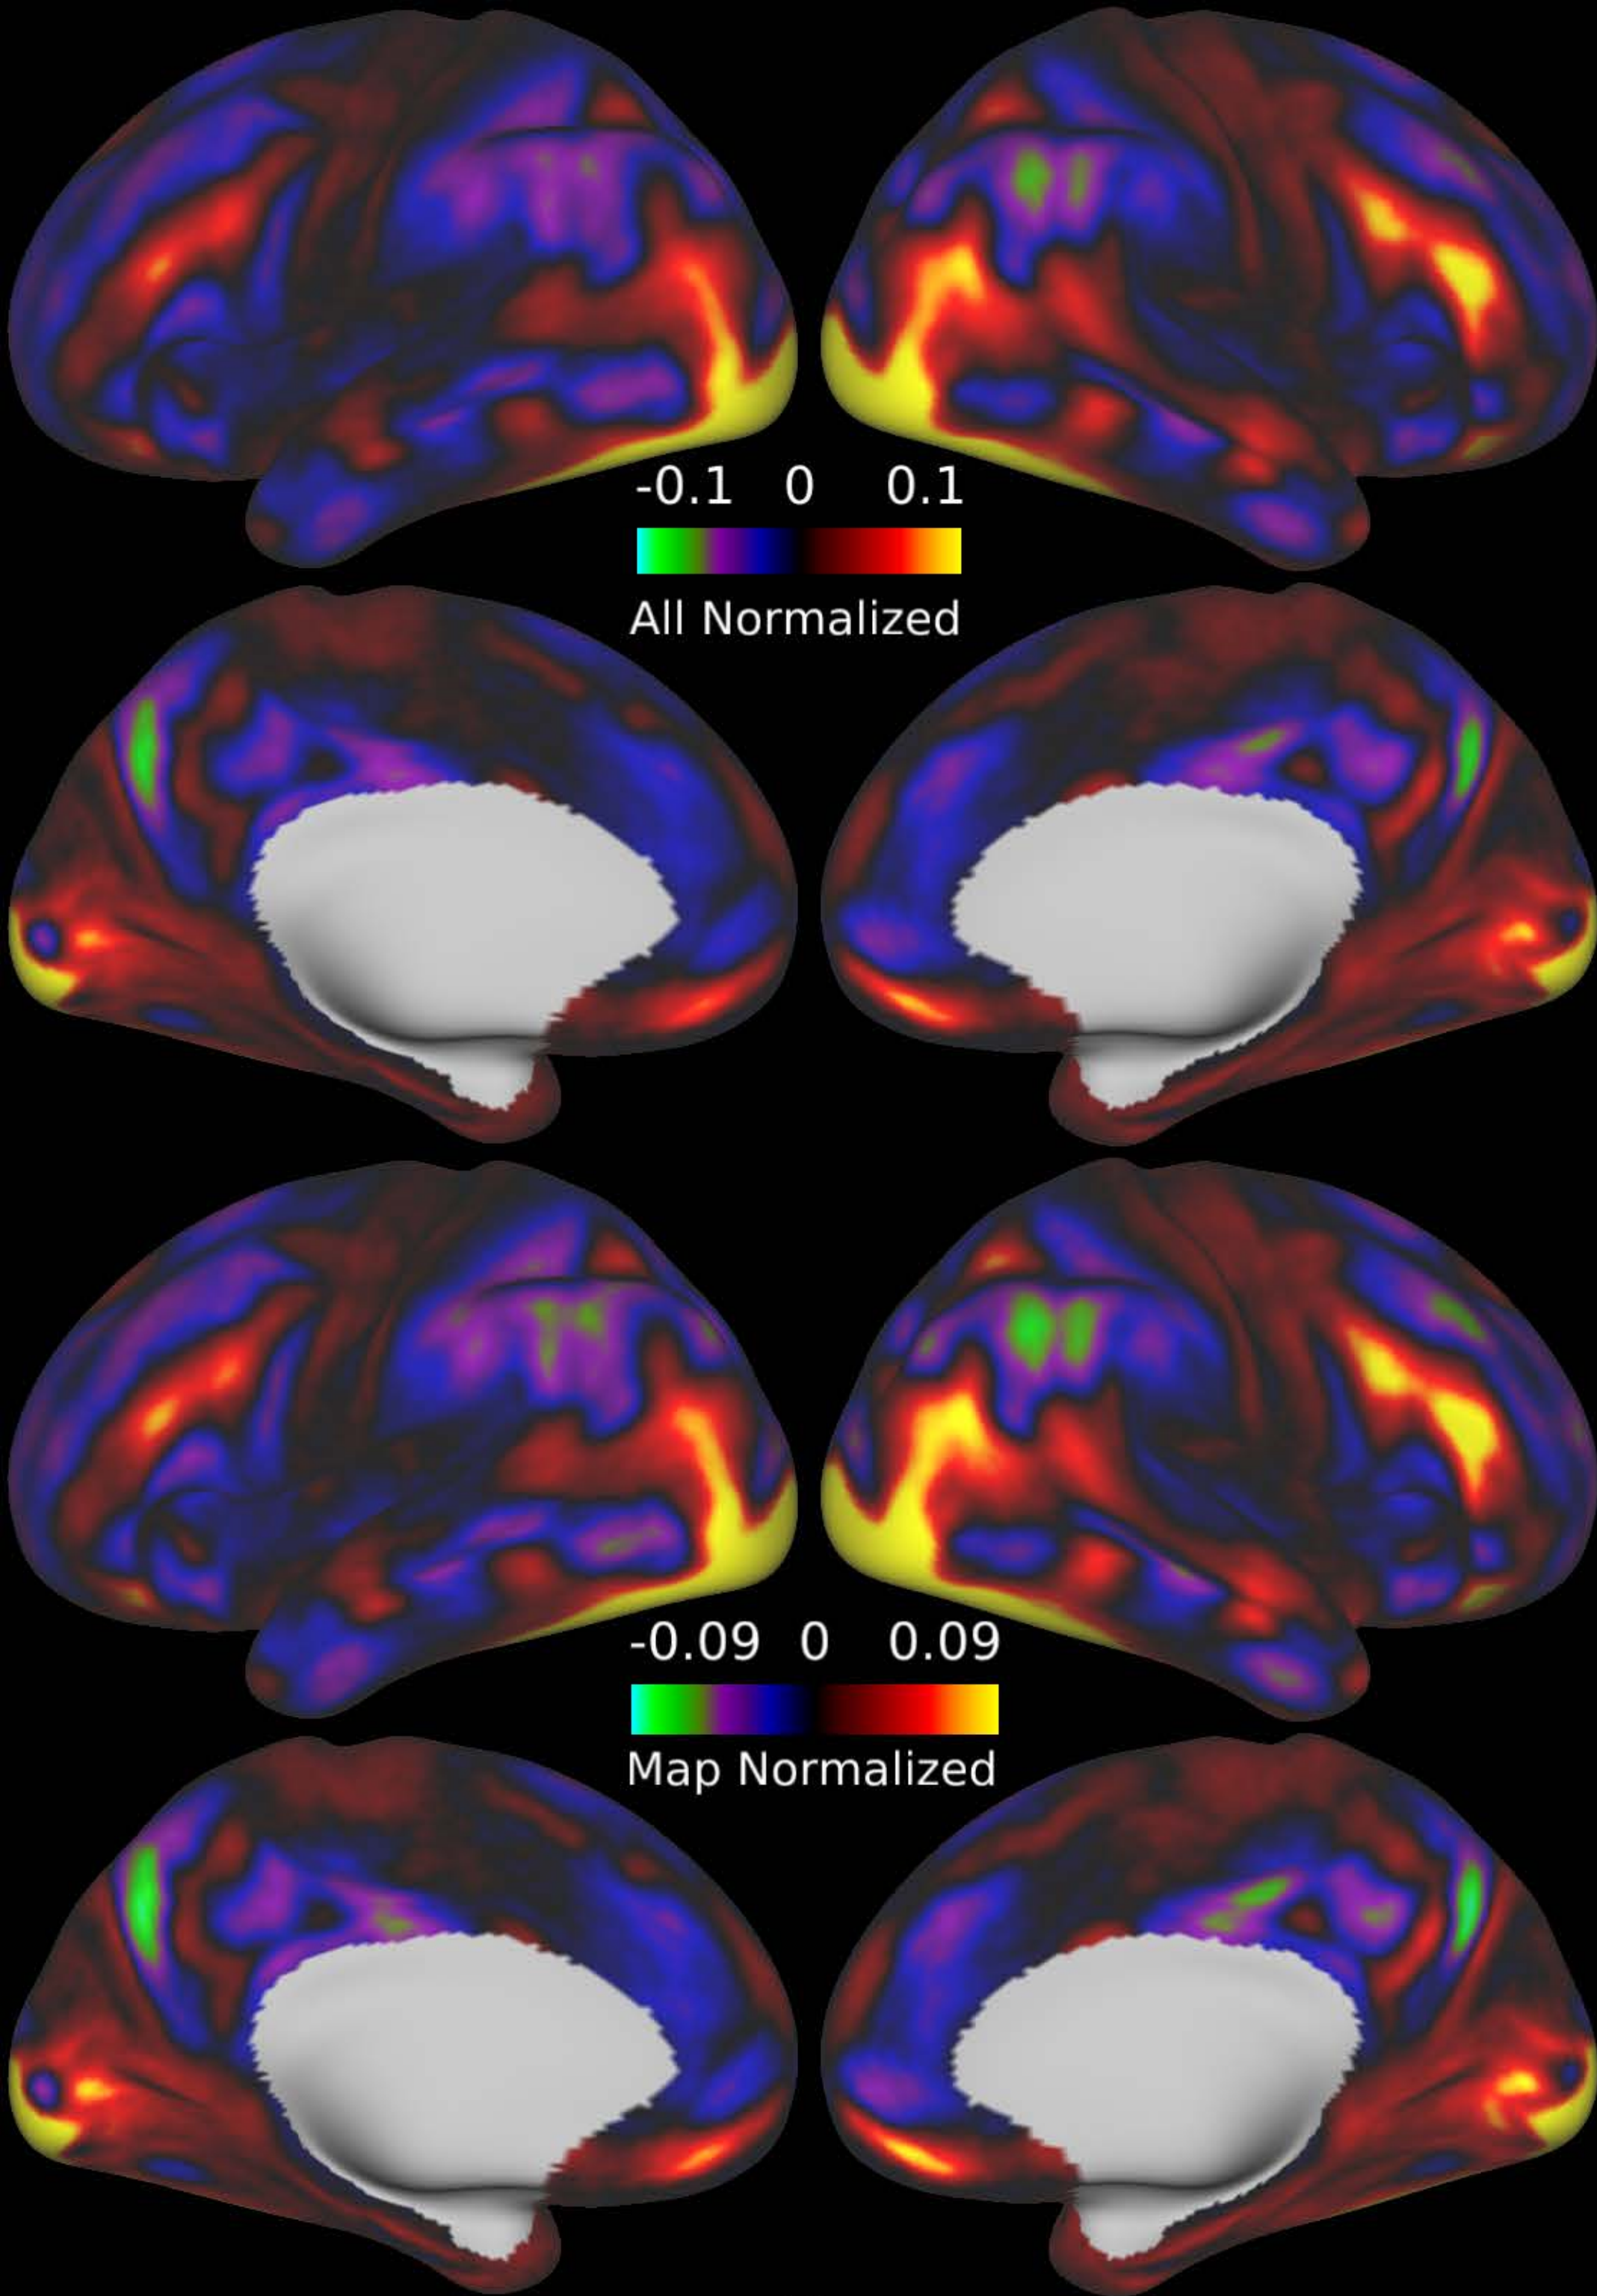

Hertz

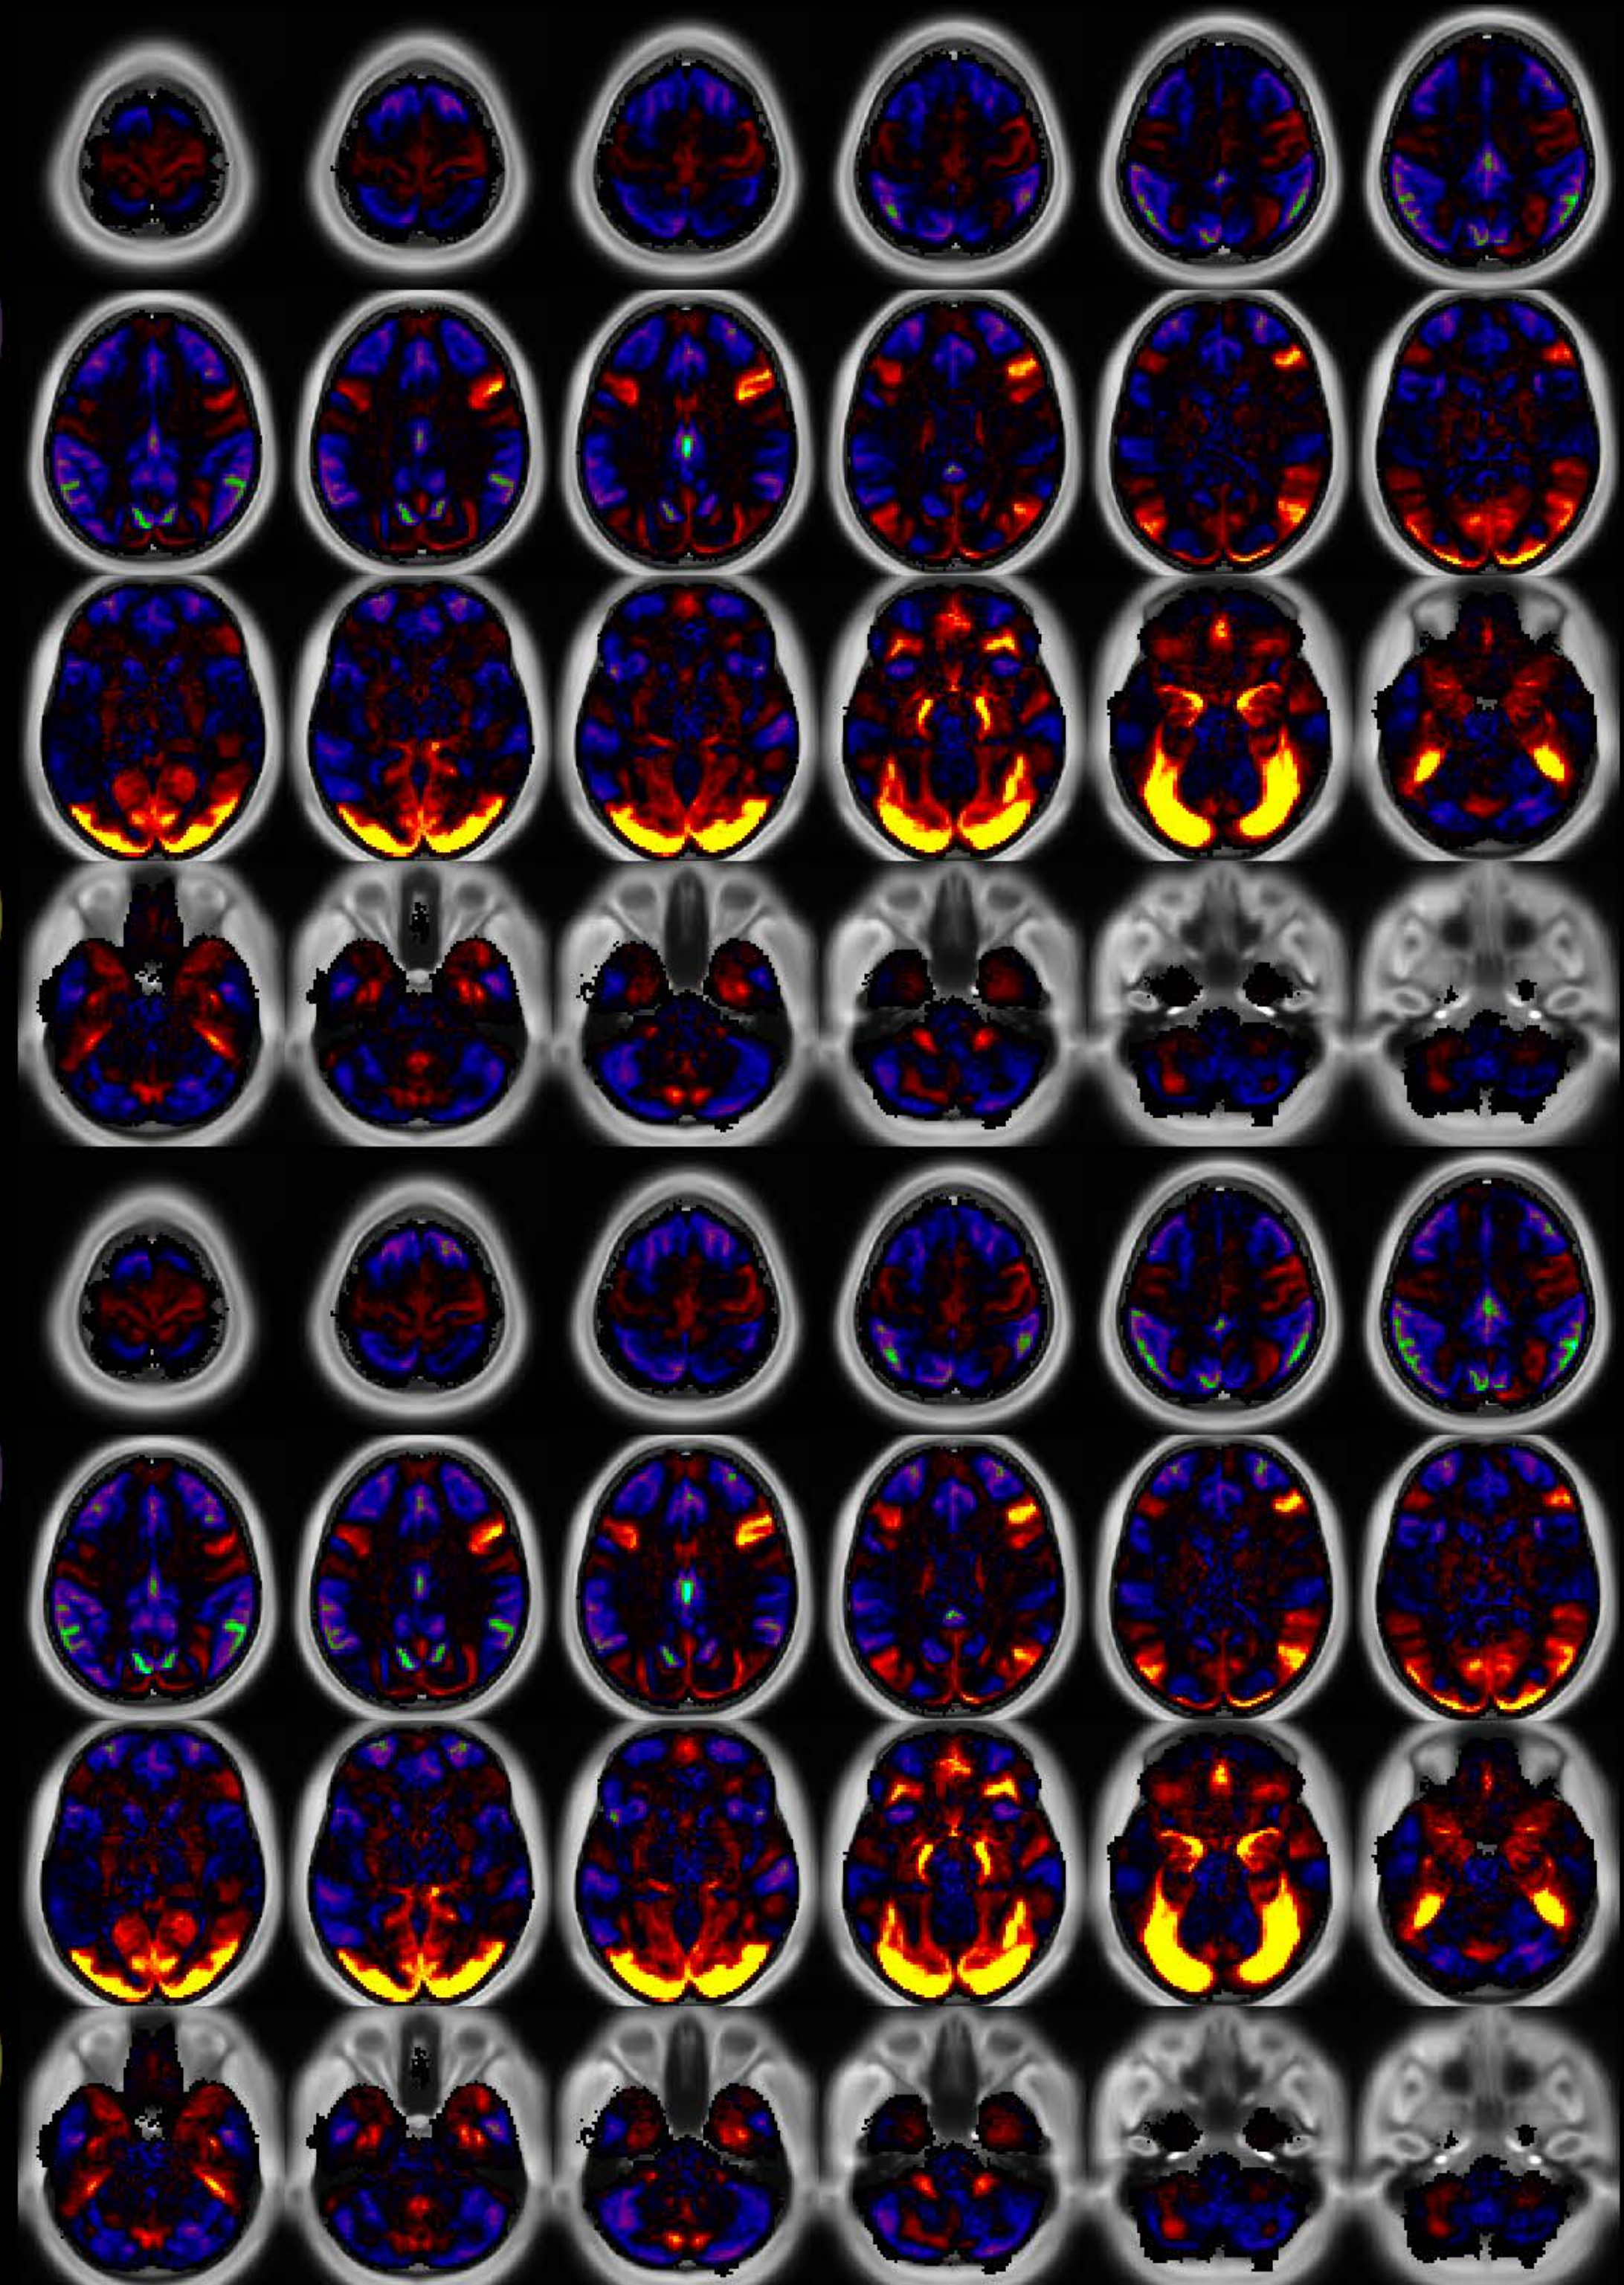

Seconds

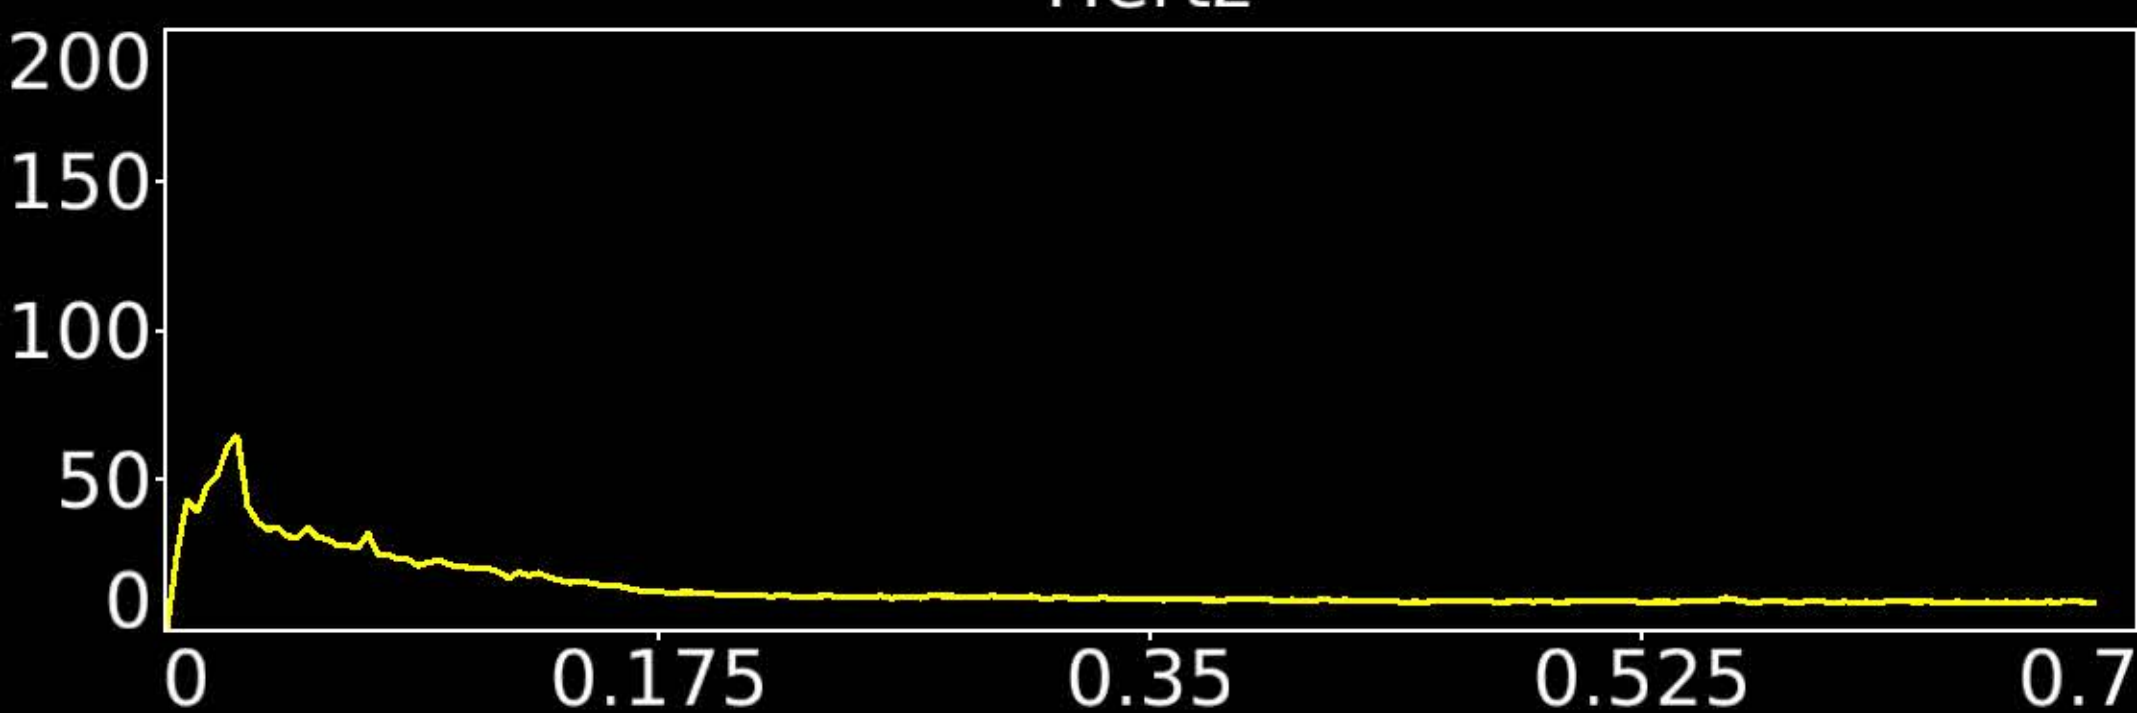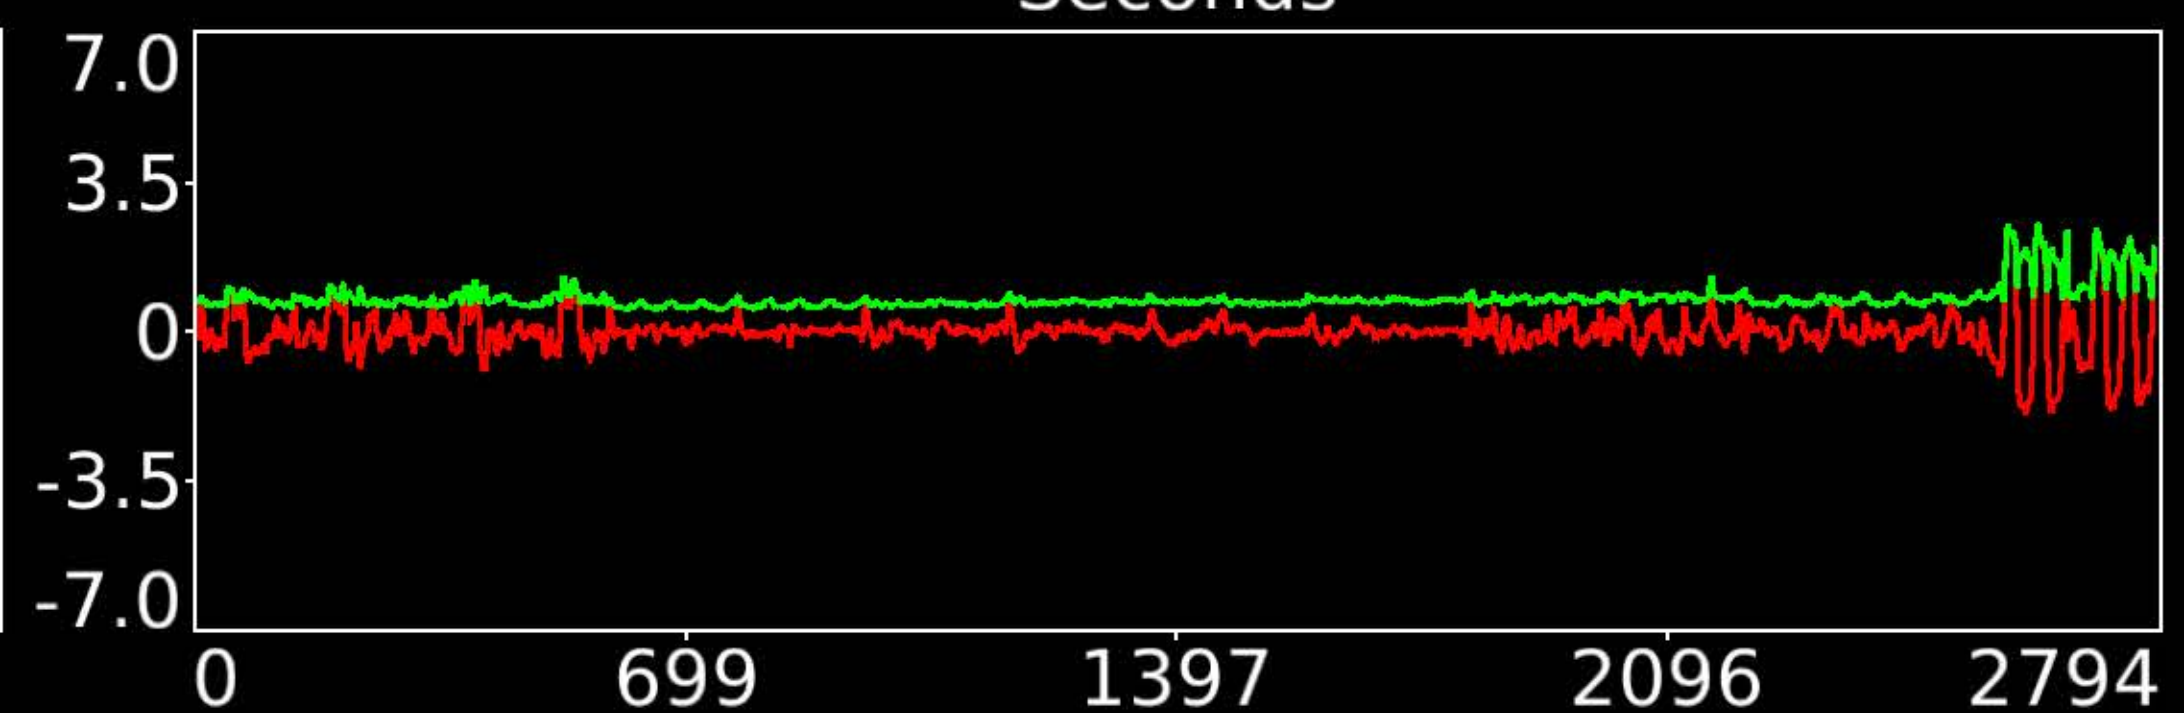

|                                                                                                               |                            |                              |  |
|---------------------------------------------------------------------------------------------------------------|----------------------------|------------------------------|--|
| Number & Class: 37 Signal                                                                                     |                            | Name: Emotion Faces > Shapes |  |
| RVT Correlated: No                                                                                            | DVARS Dip Associated: No   | Cross-Subject Variable: No   |  |
| Single Subject: No                                                                                            | % Variance Explained: 1.06 | Globality Index: 0.16        |  |
| Rest Component: No                                                                                            | Taskr Component: No        | Task Modulated: Emotion      |  |
| Rationale: Spatial map includes positive and negative patches that are correlated with a specific task design |                            |                              |  |



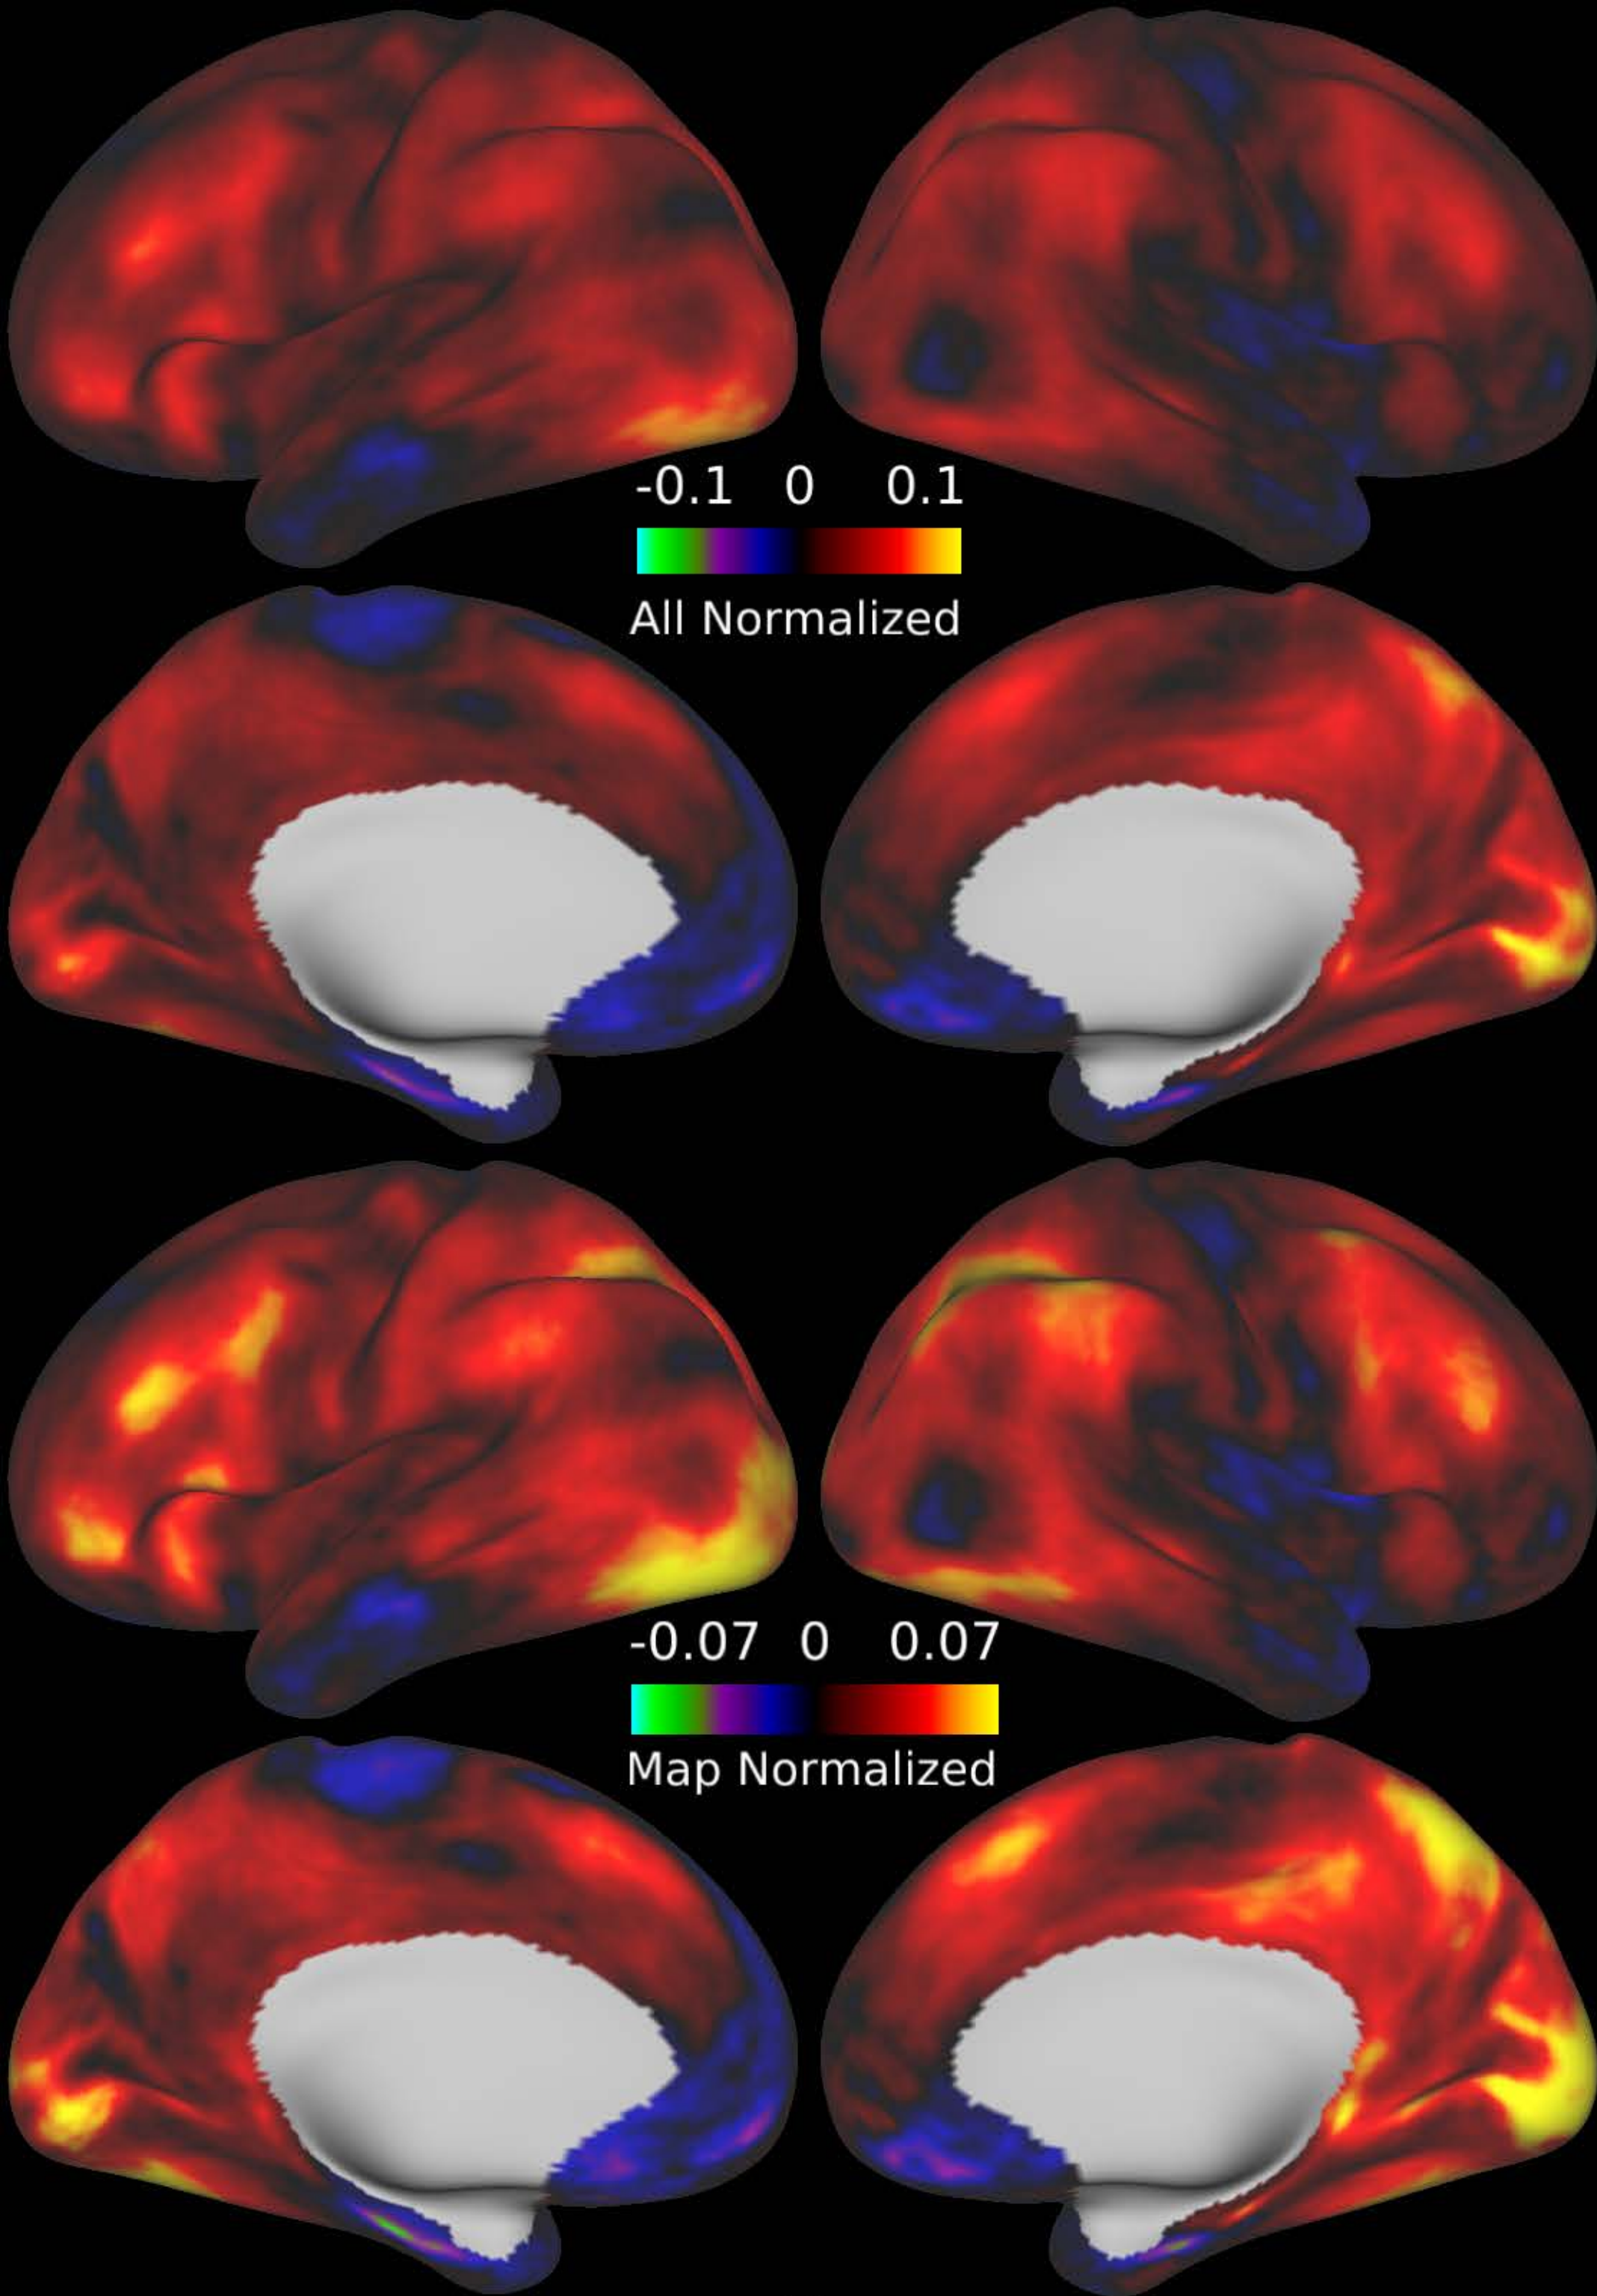

Hertz

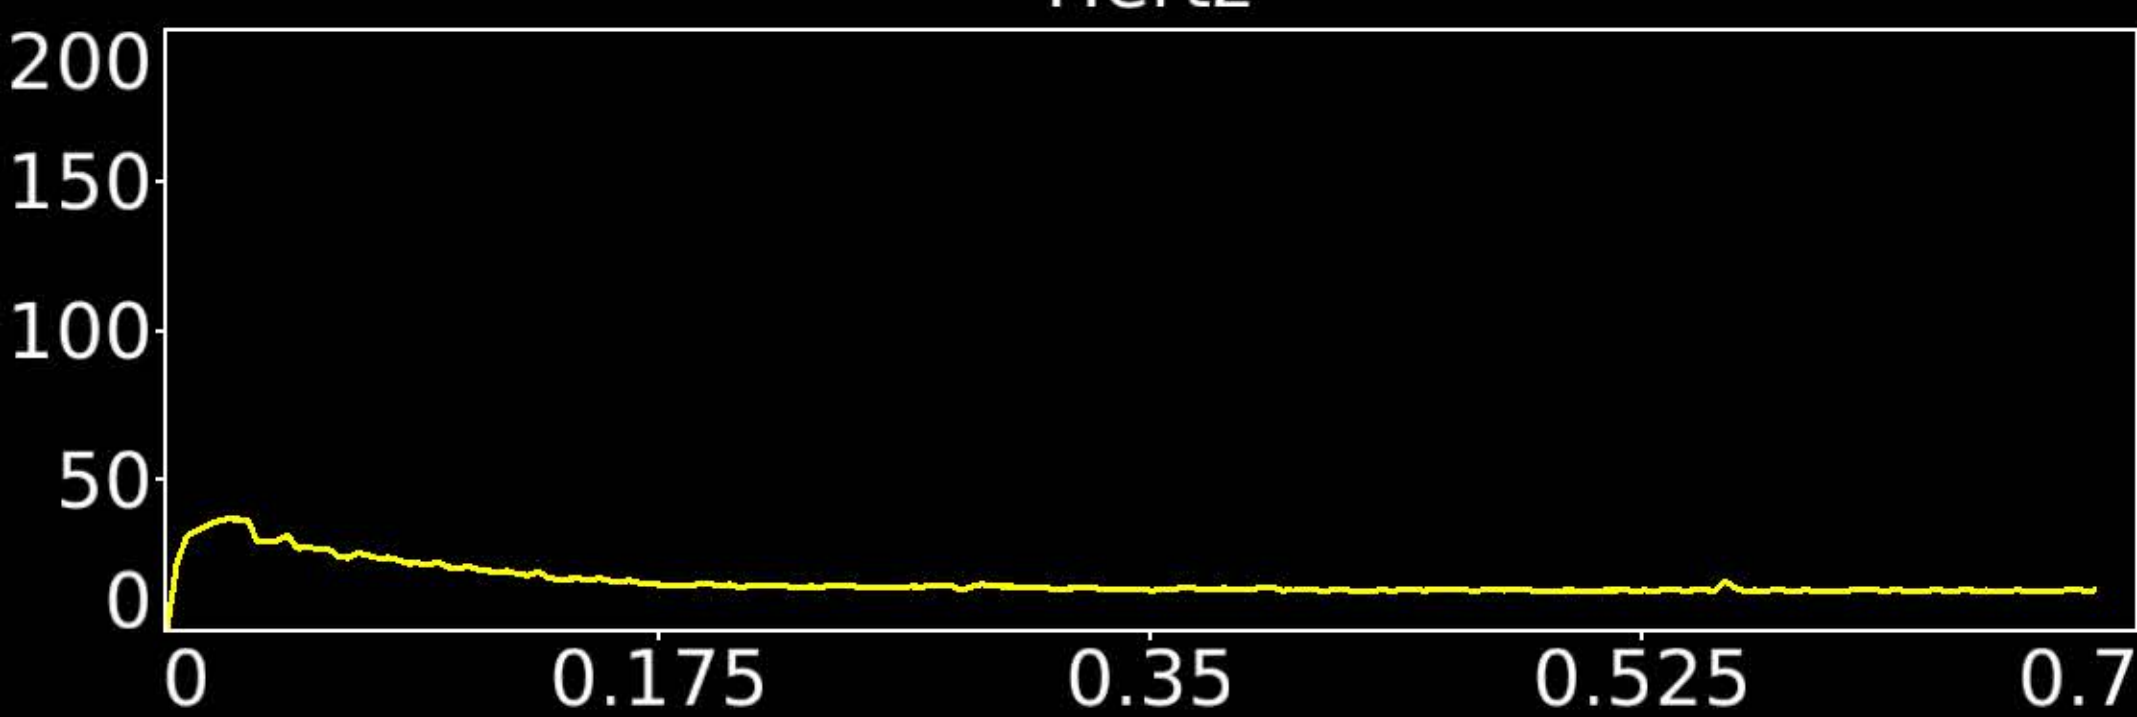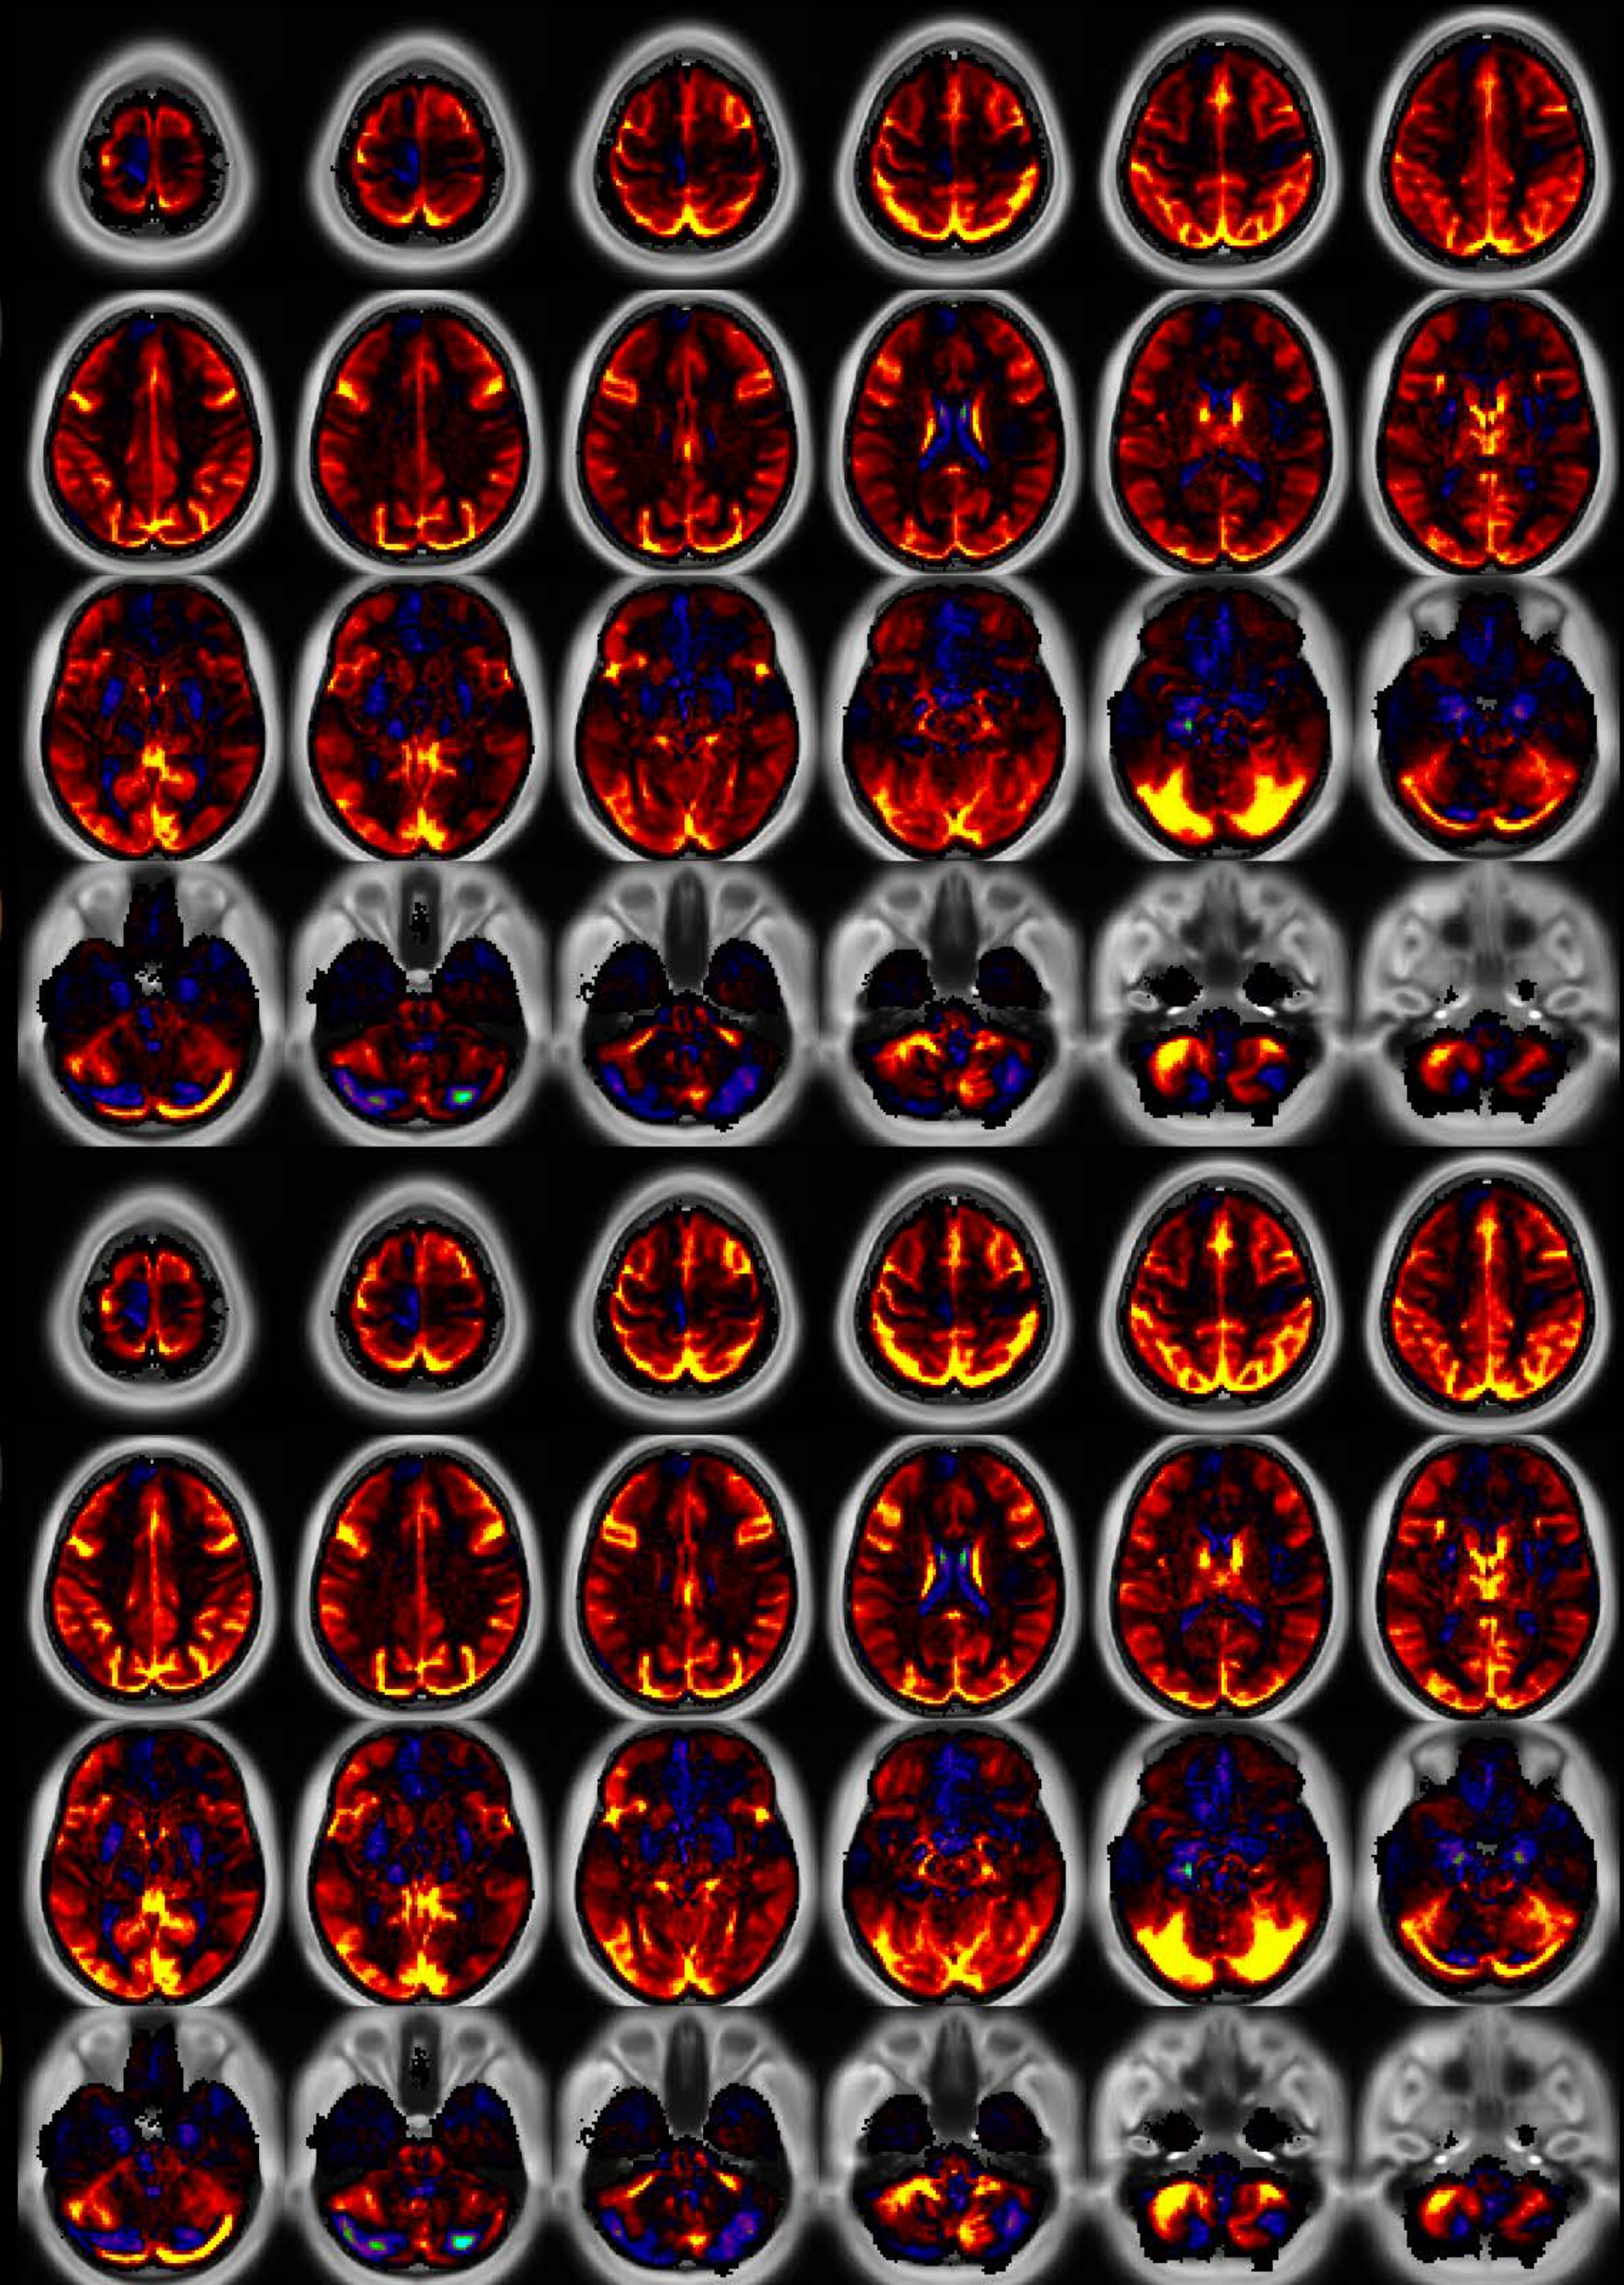

Seconds

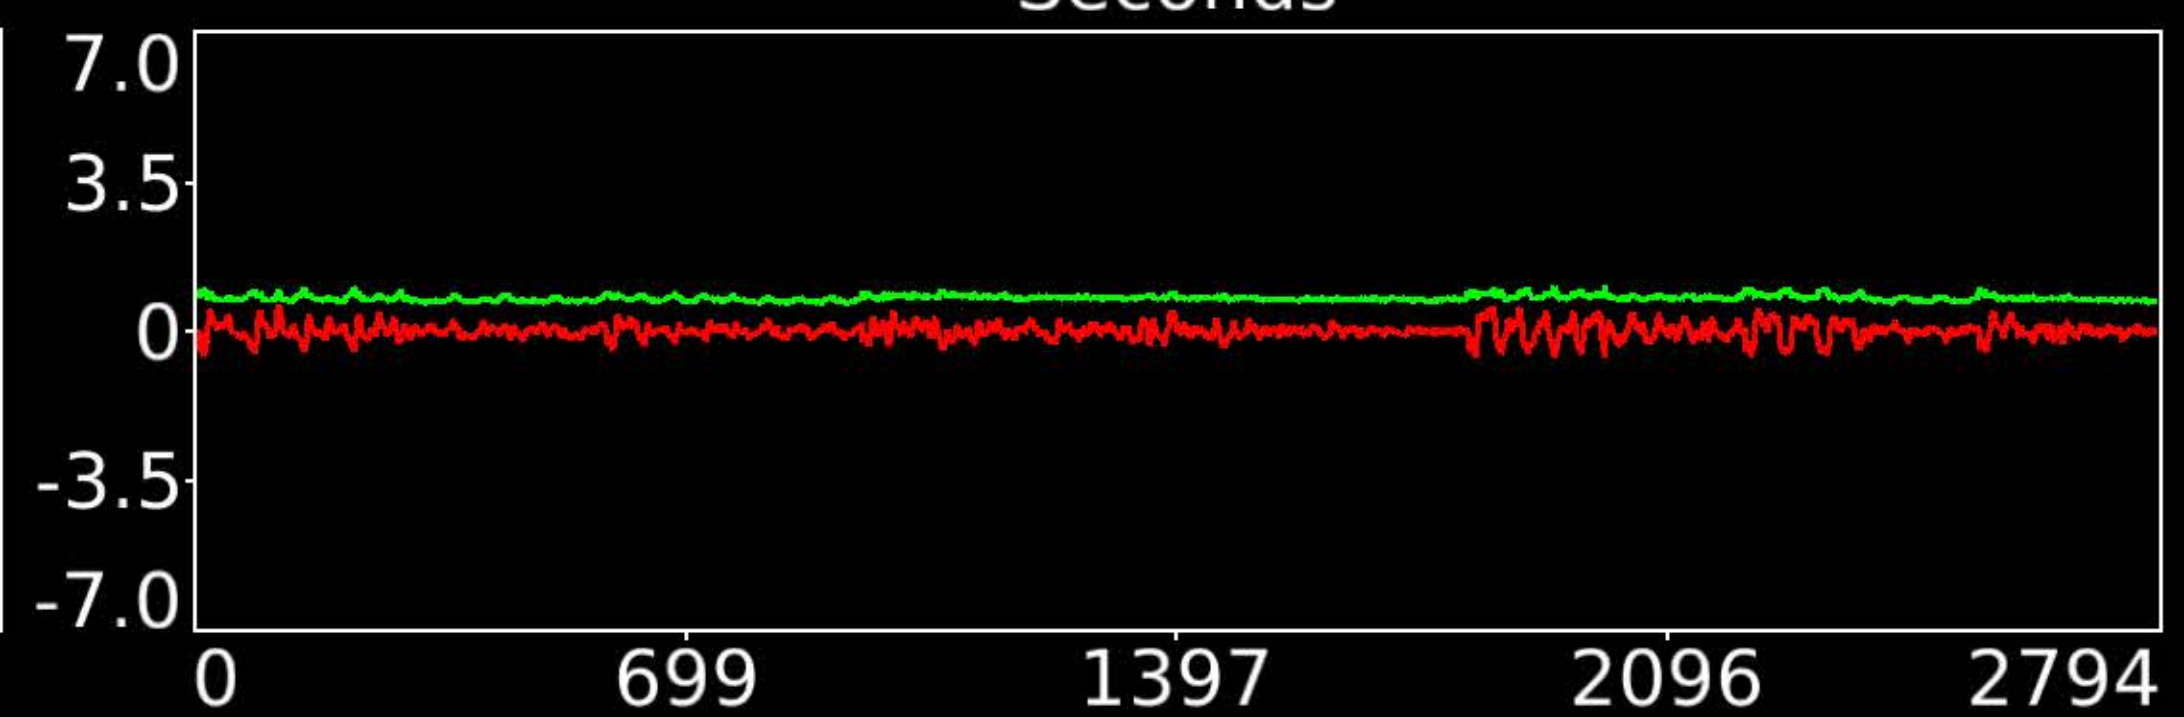

Number & Class: 38 Noise

Name: Global (Likely Physiological) Noise

RVT Correlated: No

DVARS Dip Associated: No

Cross-Subject Variable: No

Single Subject: No

% Variance Explained: 1.02

Globality Index: 2.03

Rest Component: No

Taskr Component: No

Task Modulated: No

Rationale: Globally positive component without positive and negative patches that respect known RSNs or areas; some white matter signal



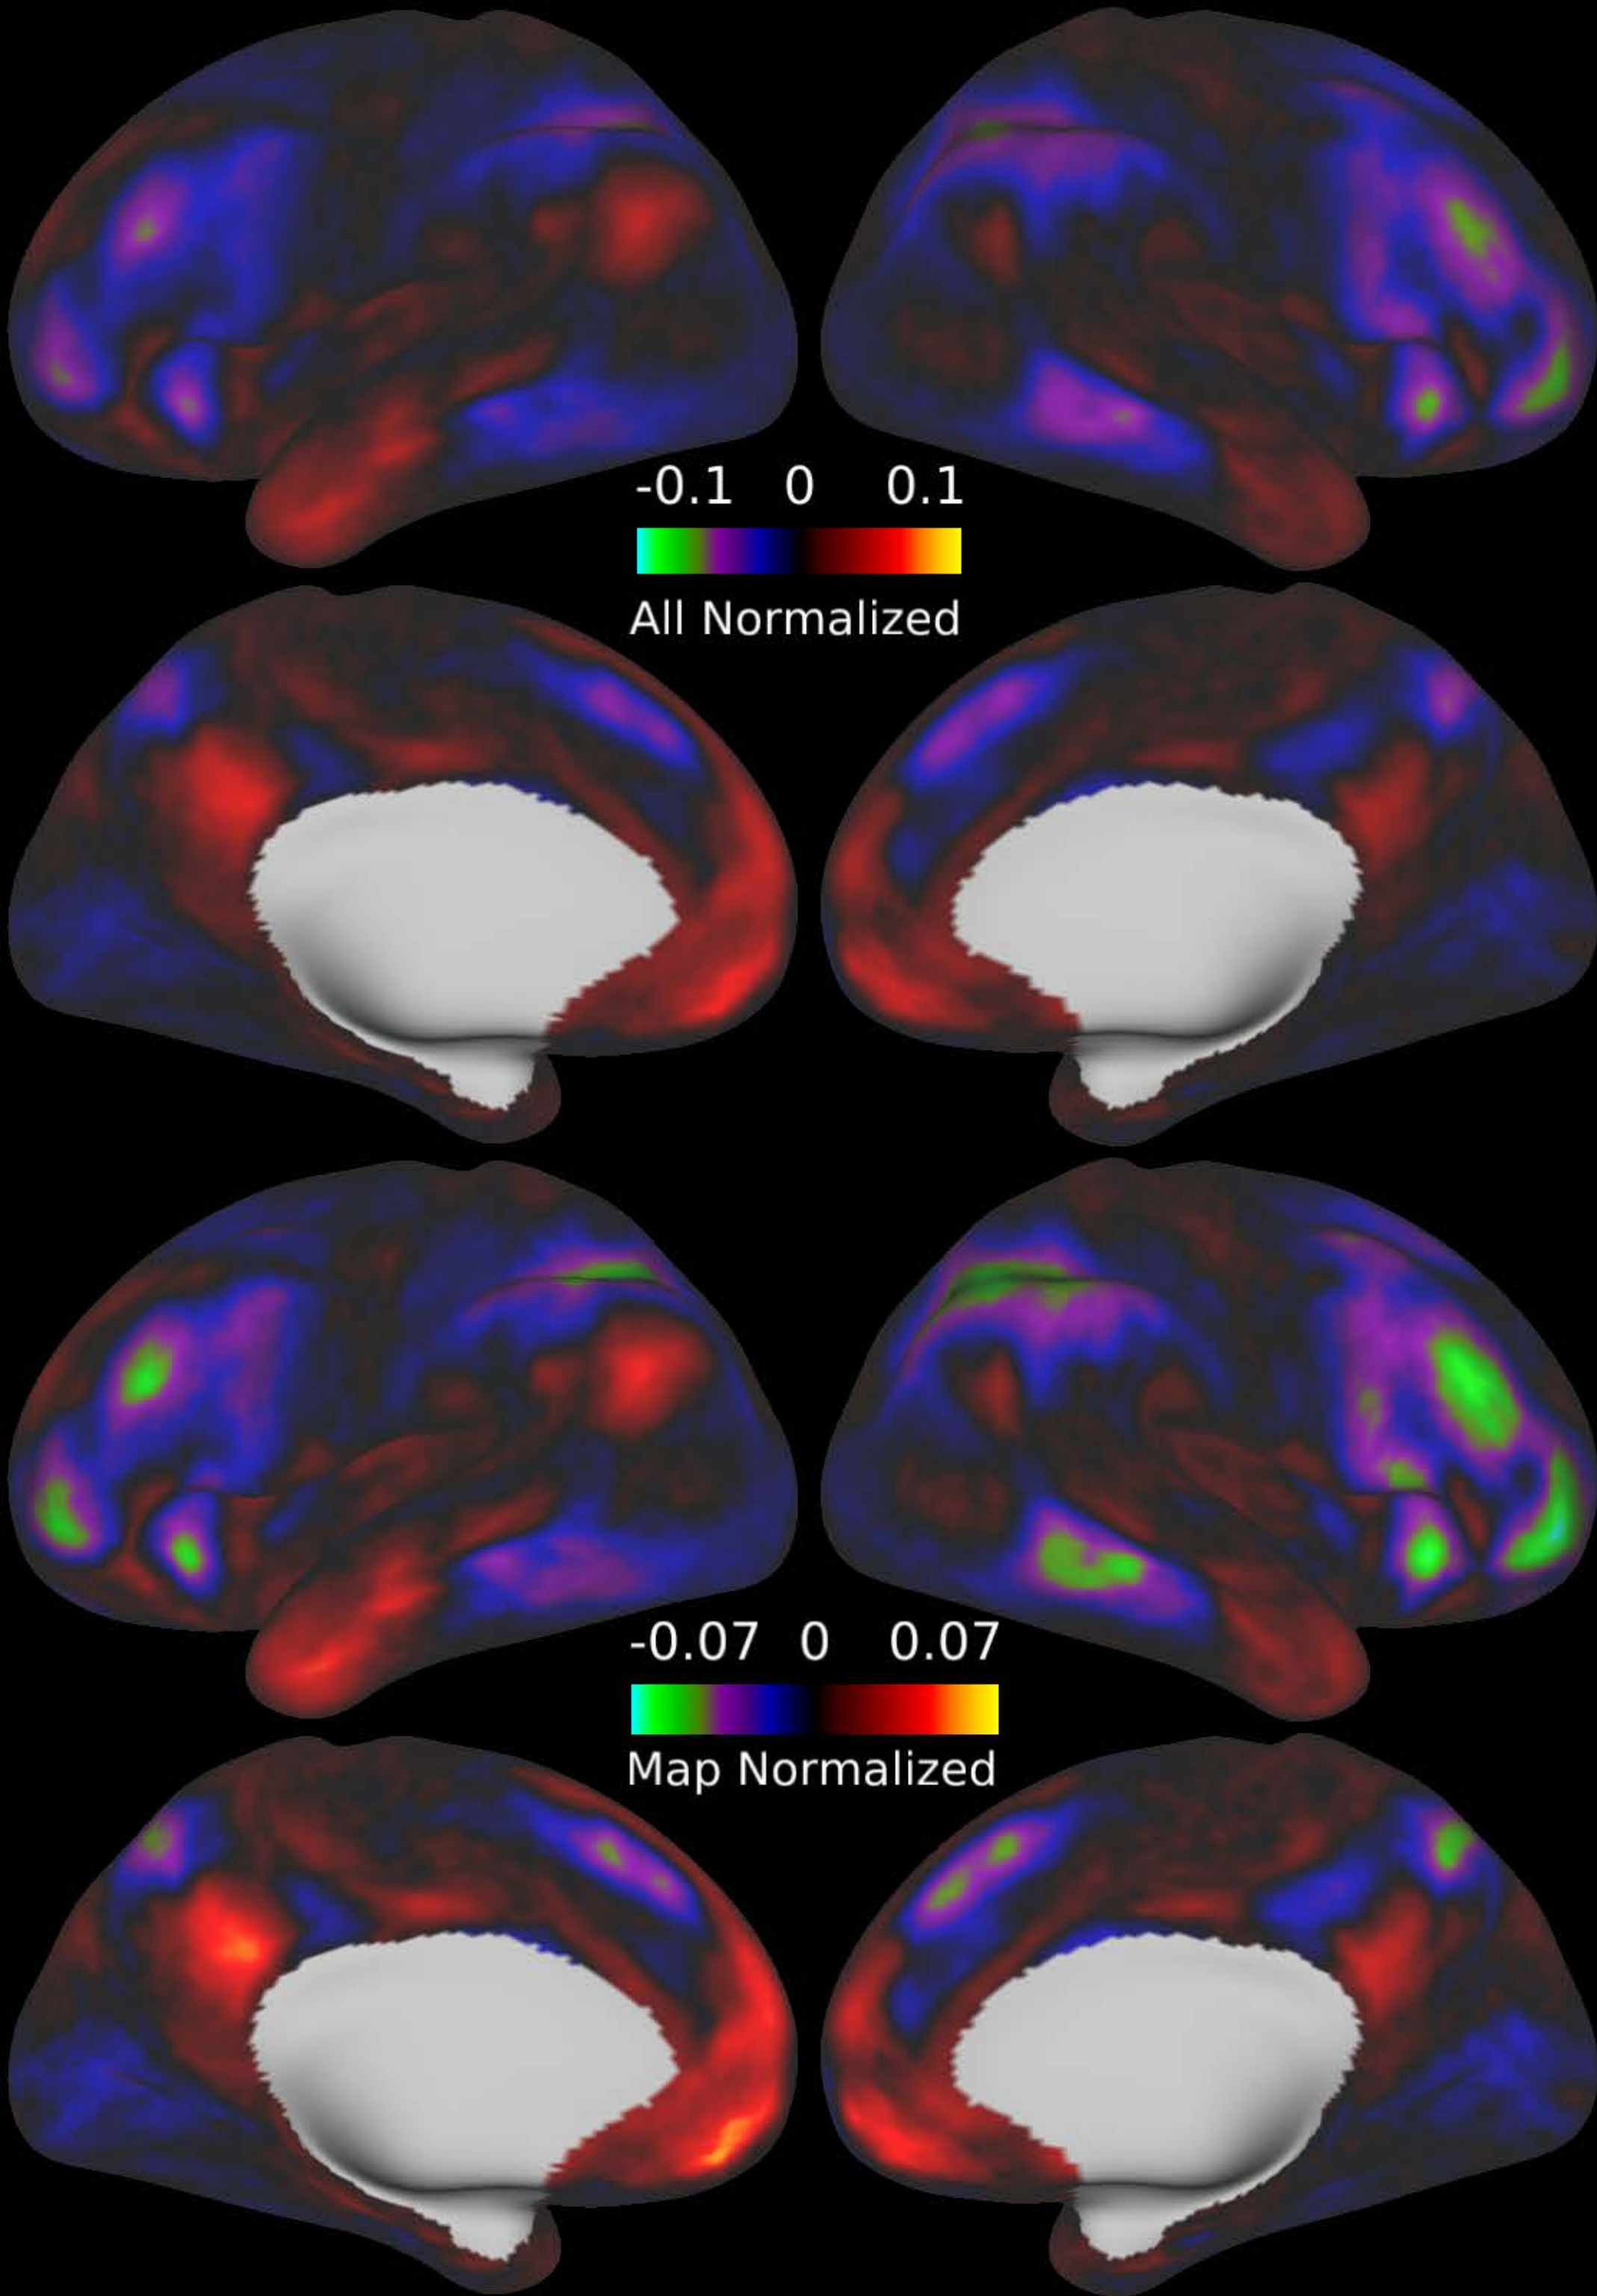

Hertz

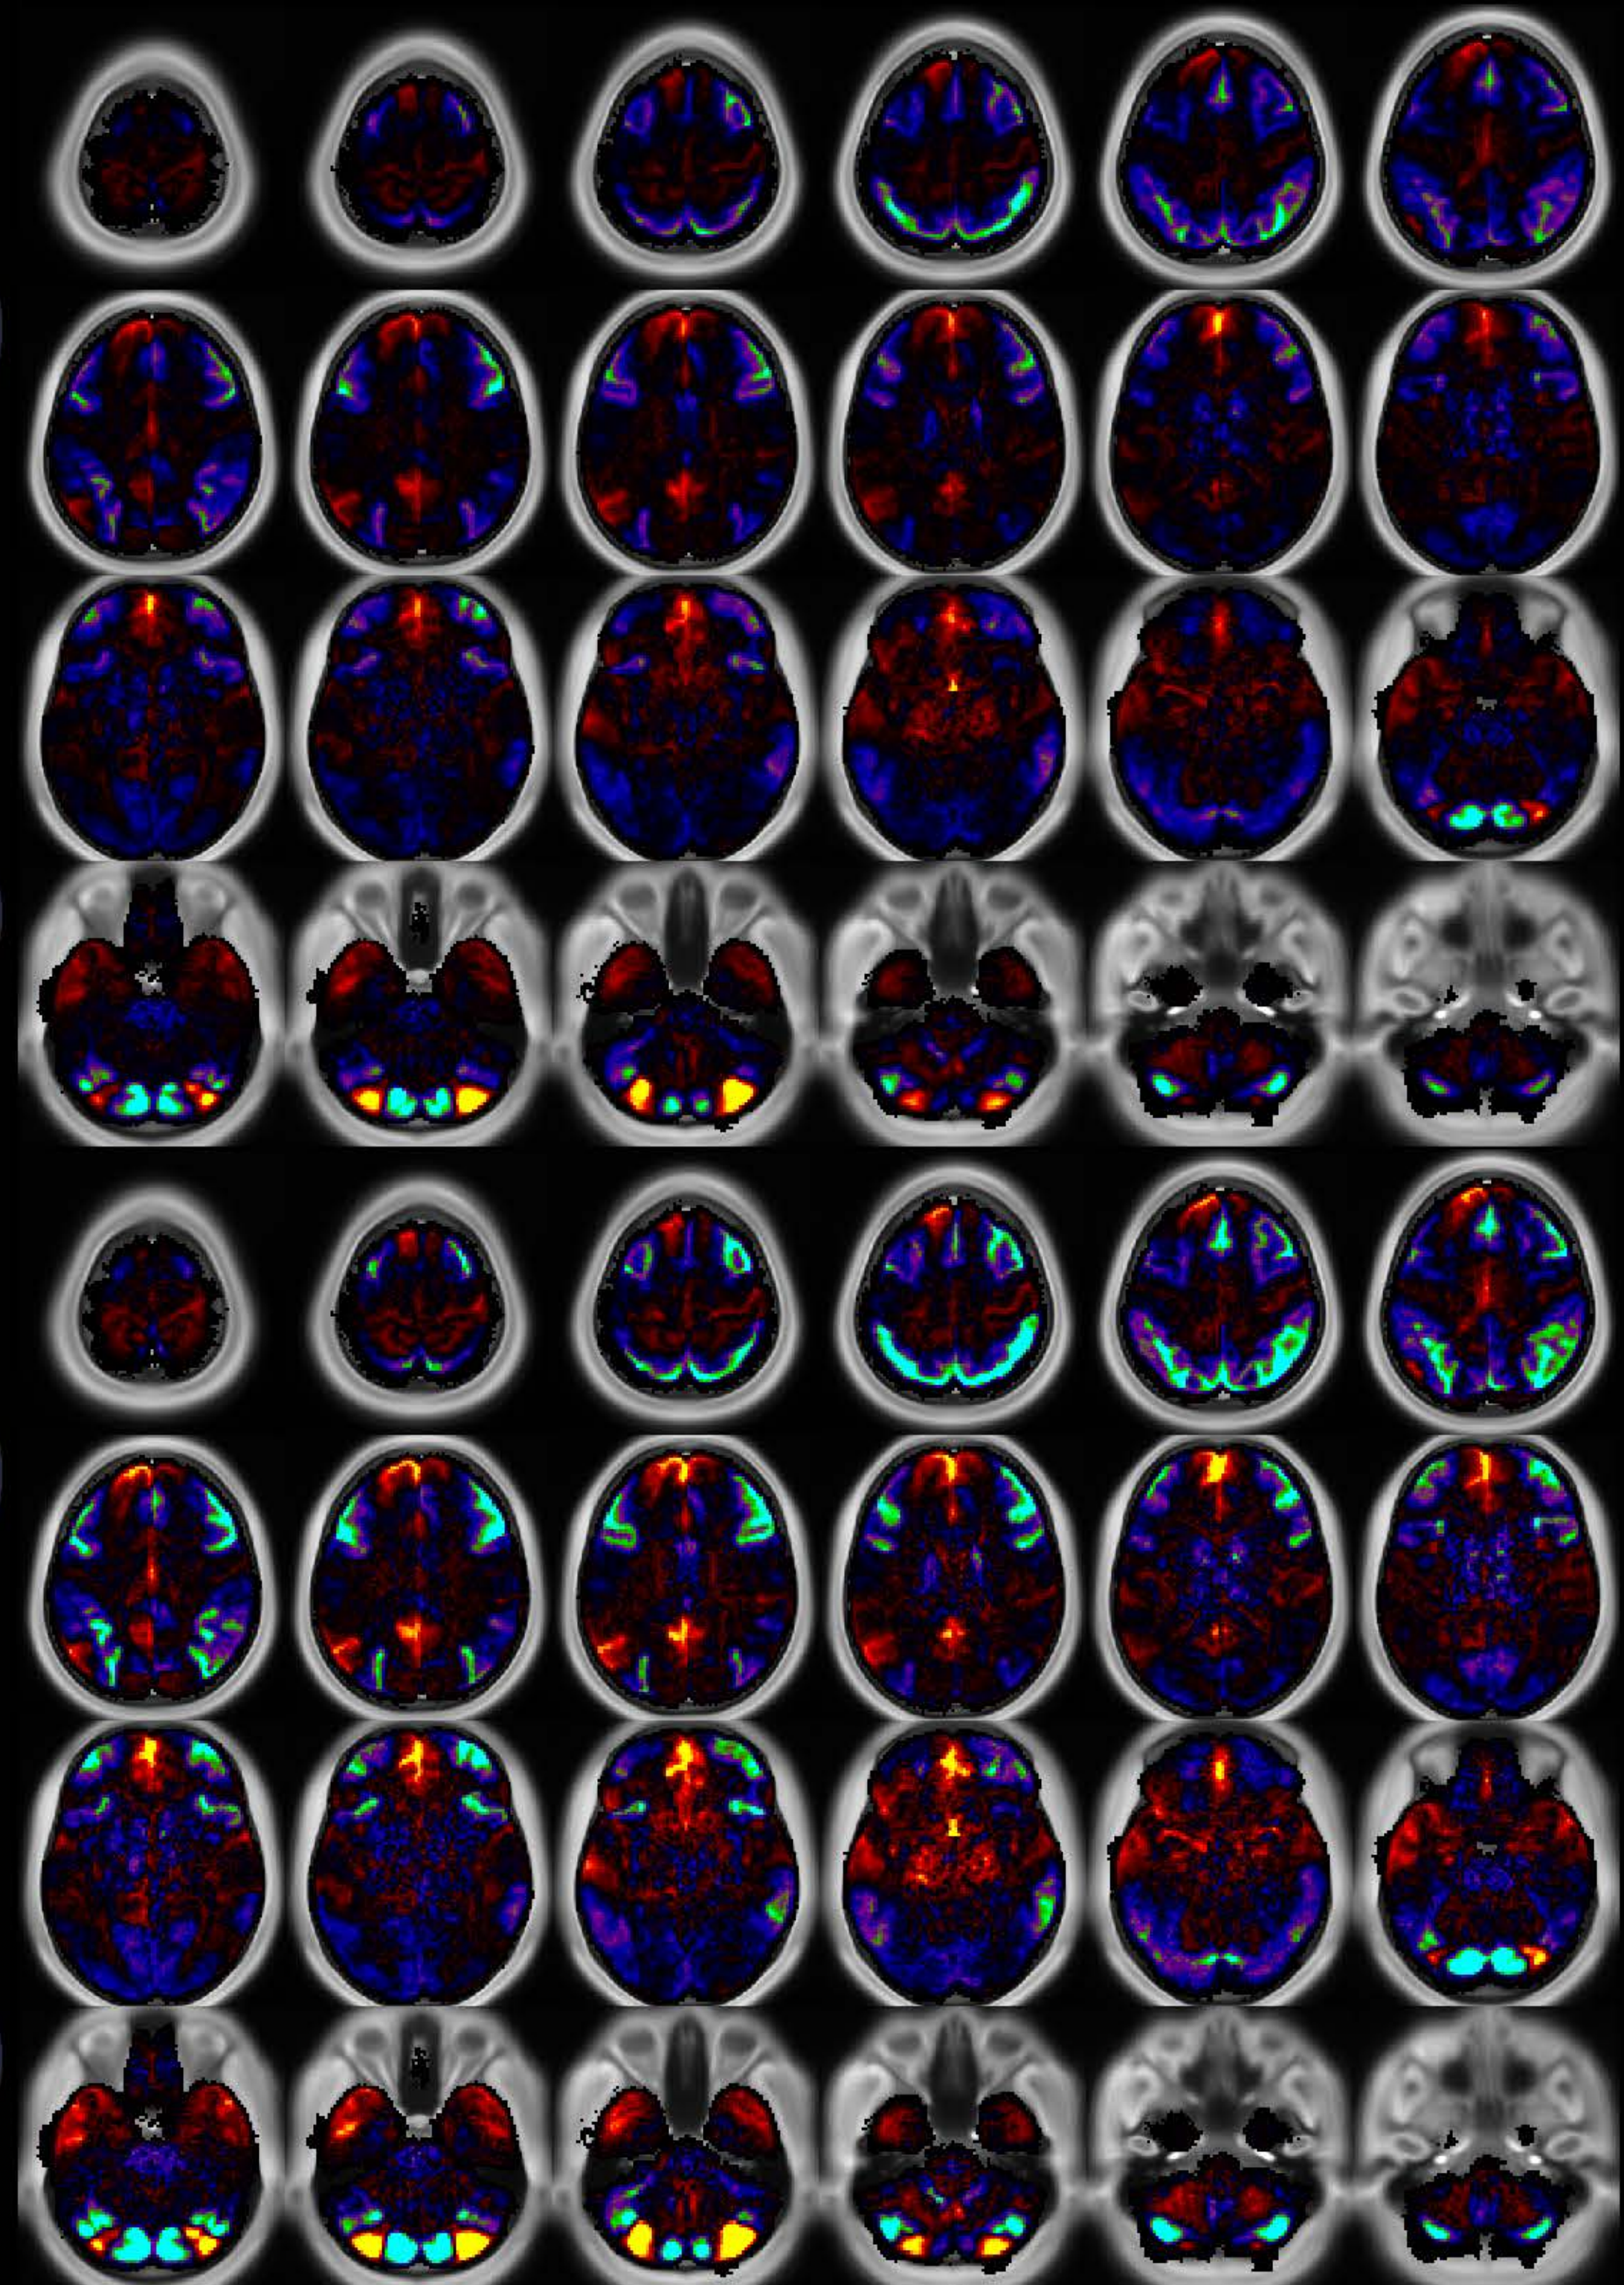

Seconds

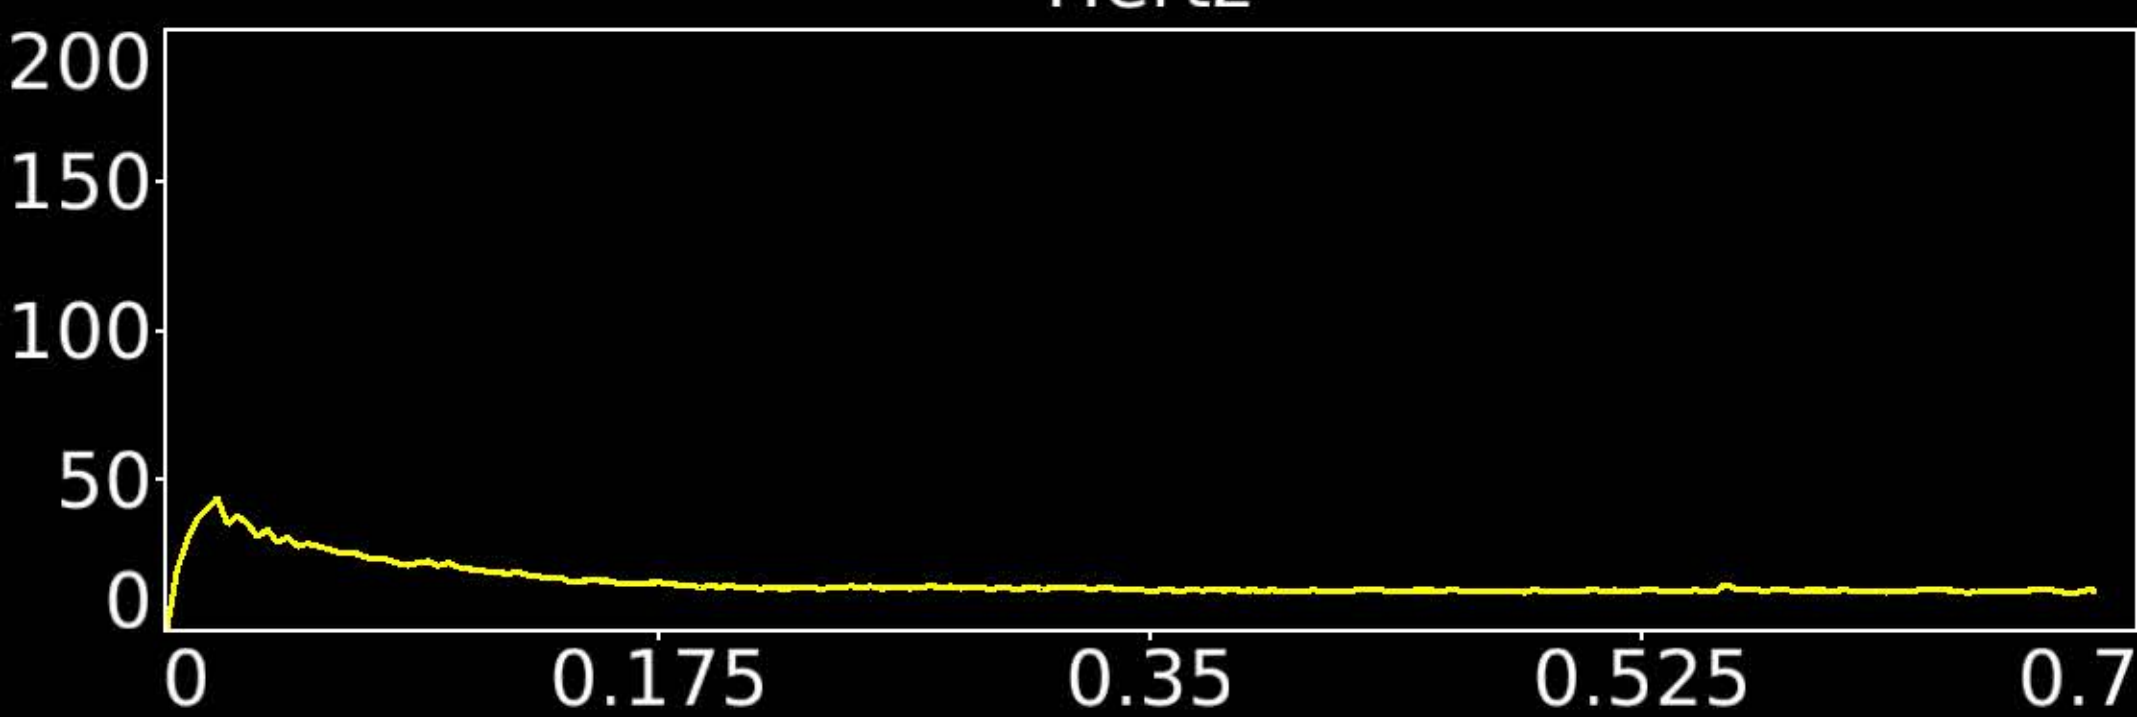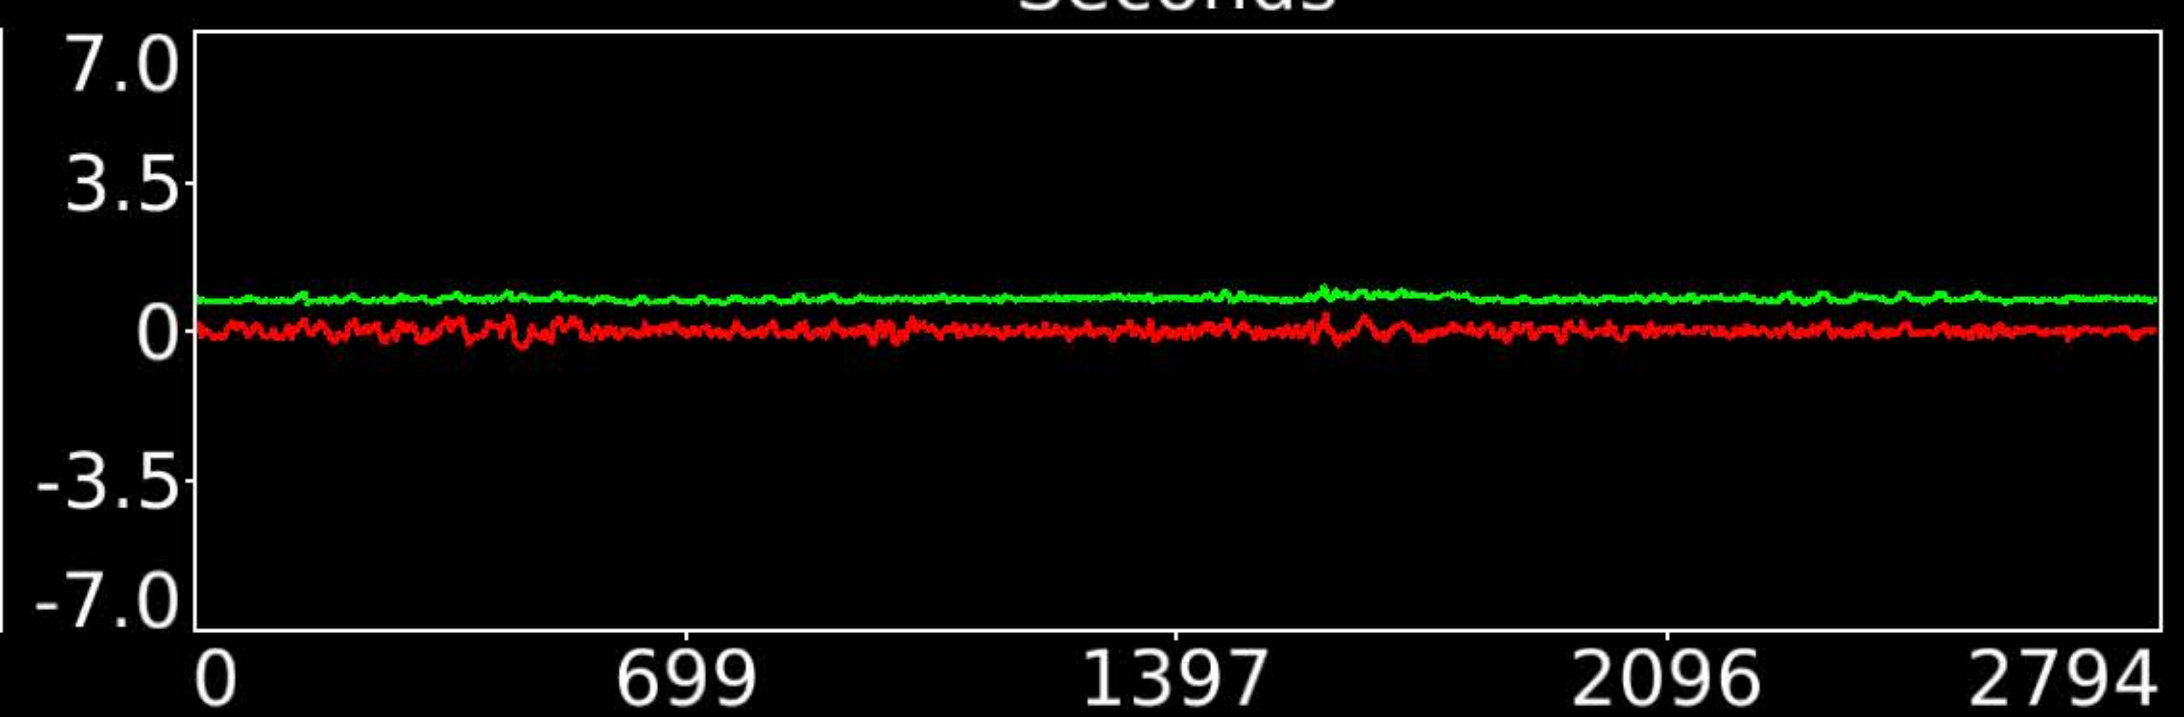

|                           |                            |                            |  |
|---------------------------|----------------------------|----------------------------|--|
| Number & Class: 39 Signal |                            | Name: Cerebellar Unknown   |  |
| RVT Correlated: No        | DVARS Dip Associated: No   | Cross-Subject Variable: No |  |
| Single Subject: No        | % Variance Explained: 0.96 | Globality Index: 0.19      |  |
| Rest Component: No        | Taskr Component: No        | Task Modulated: No         |  |

Rationale: Spatial map includes positive and negative patches that respect known RSN boundaries in the cerebellum



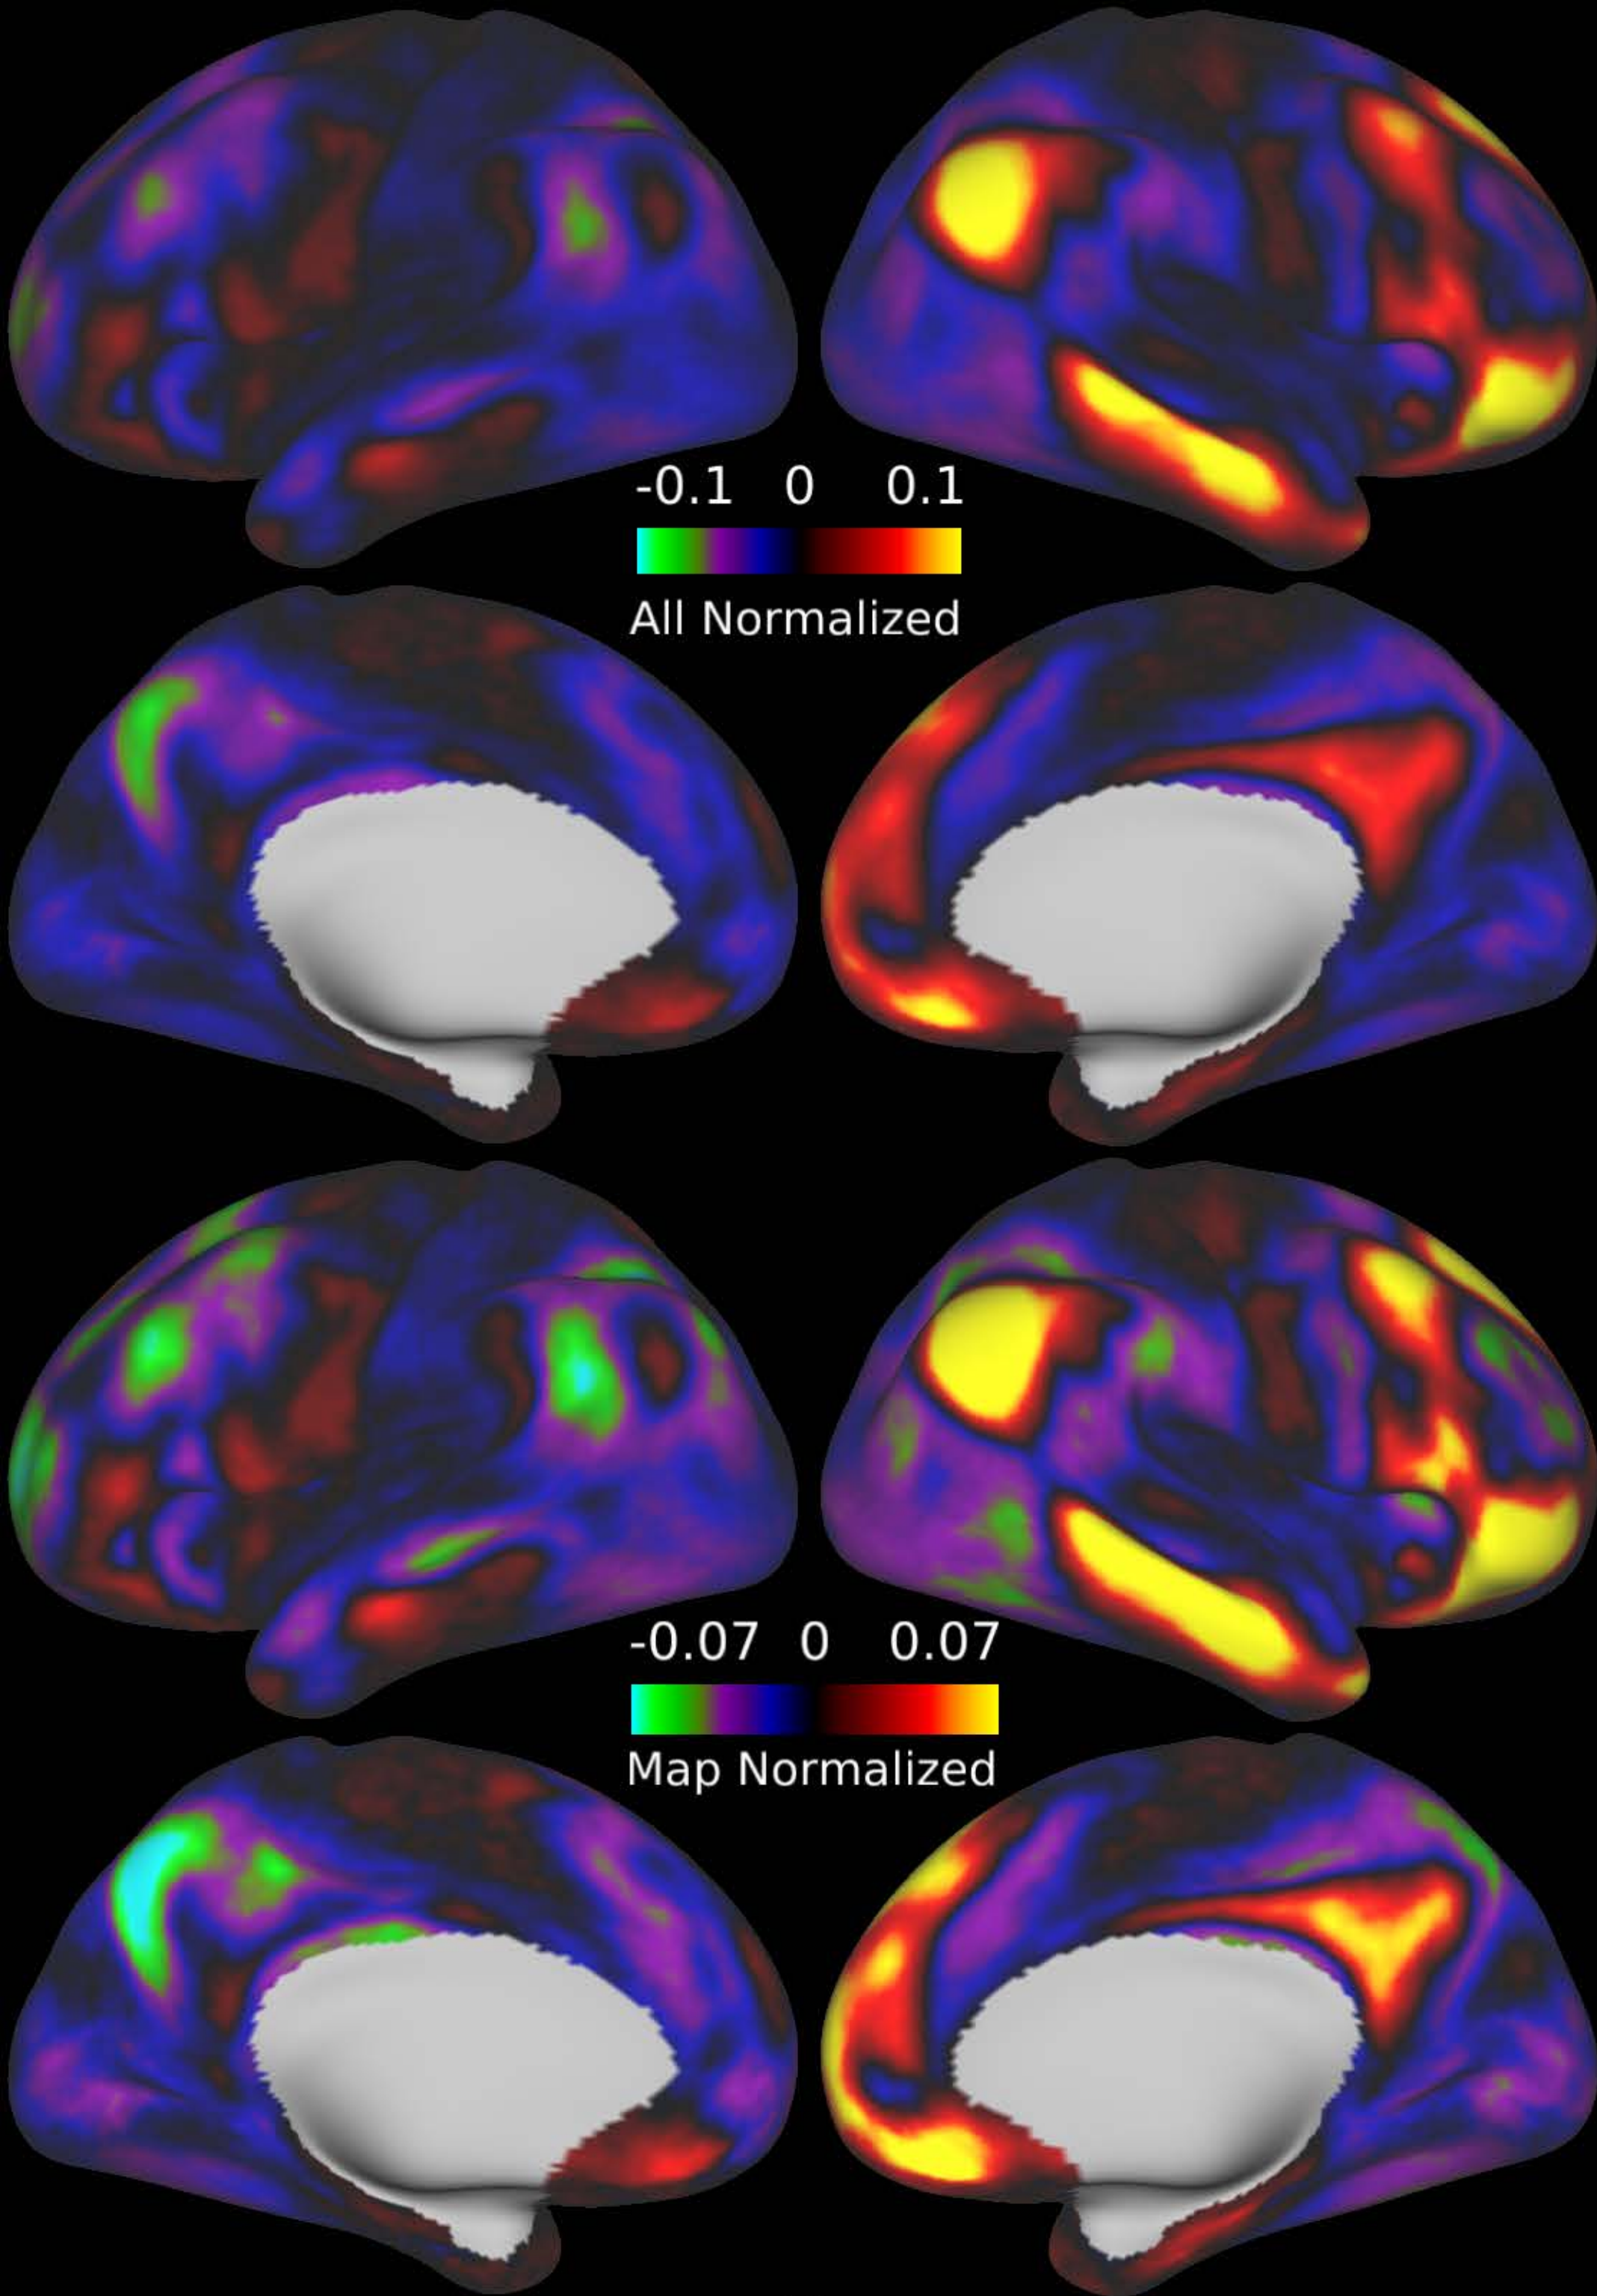

Hertz

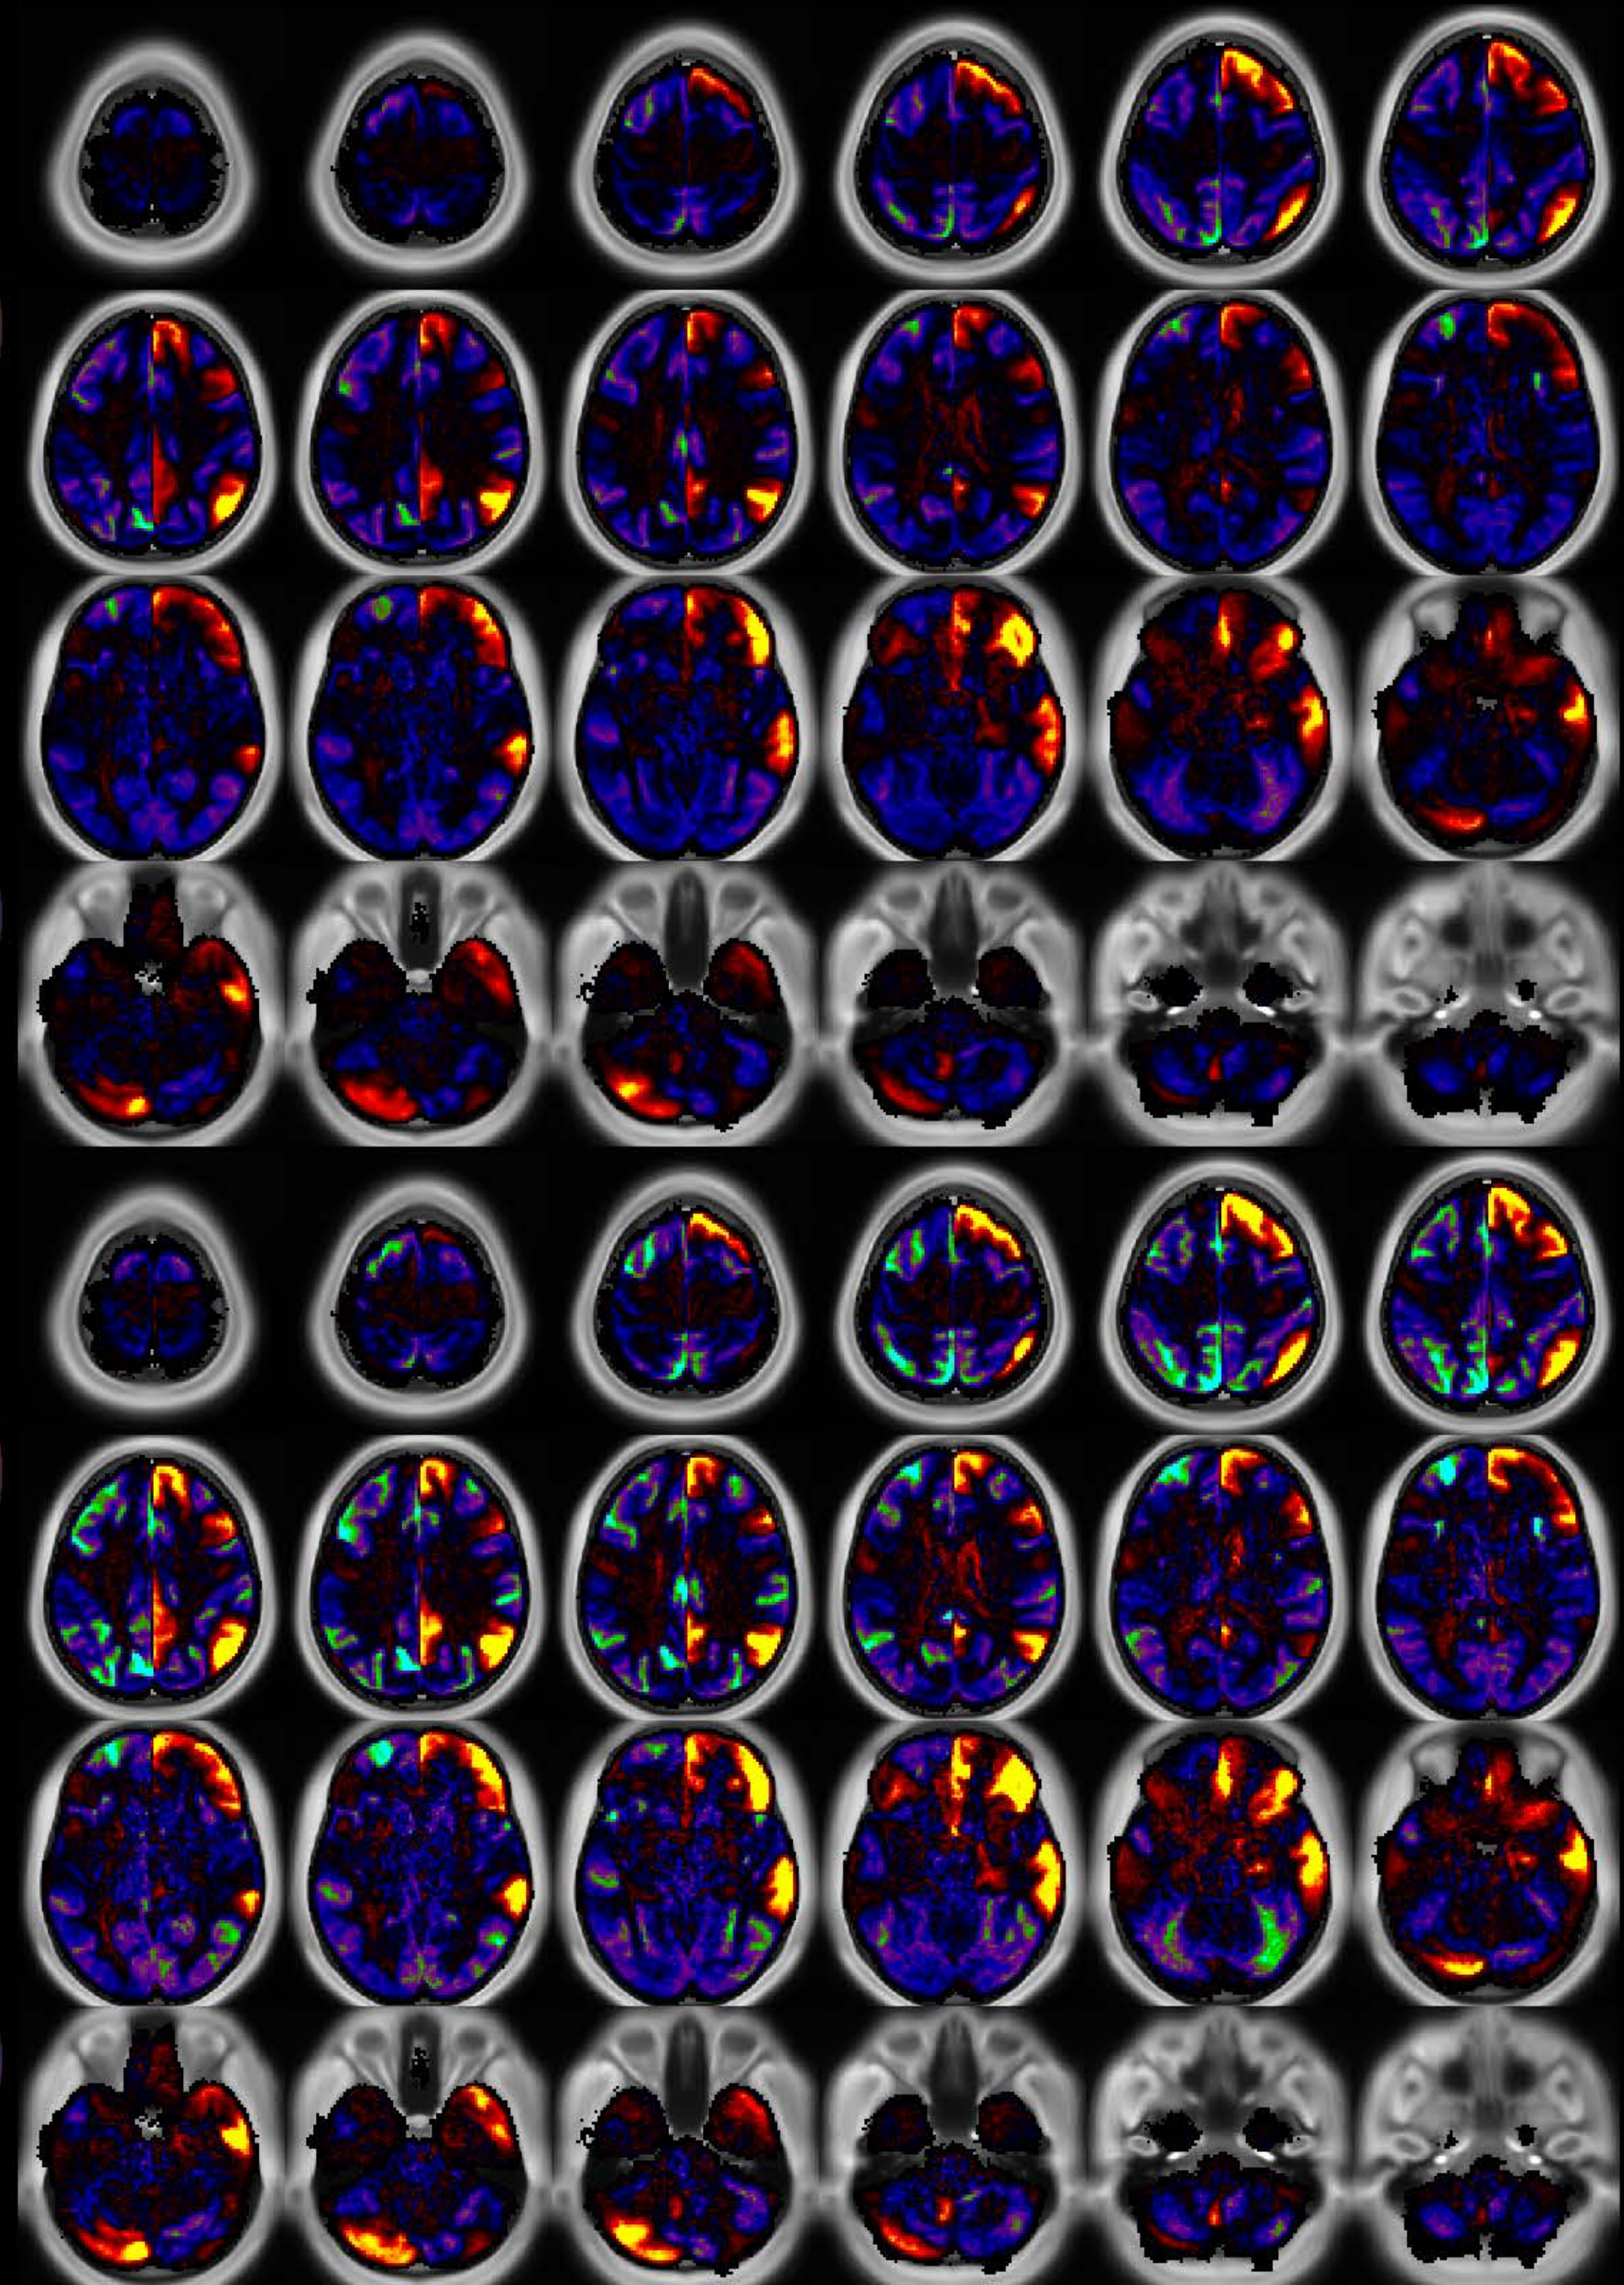

Seconds

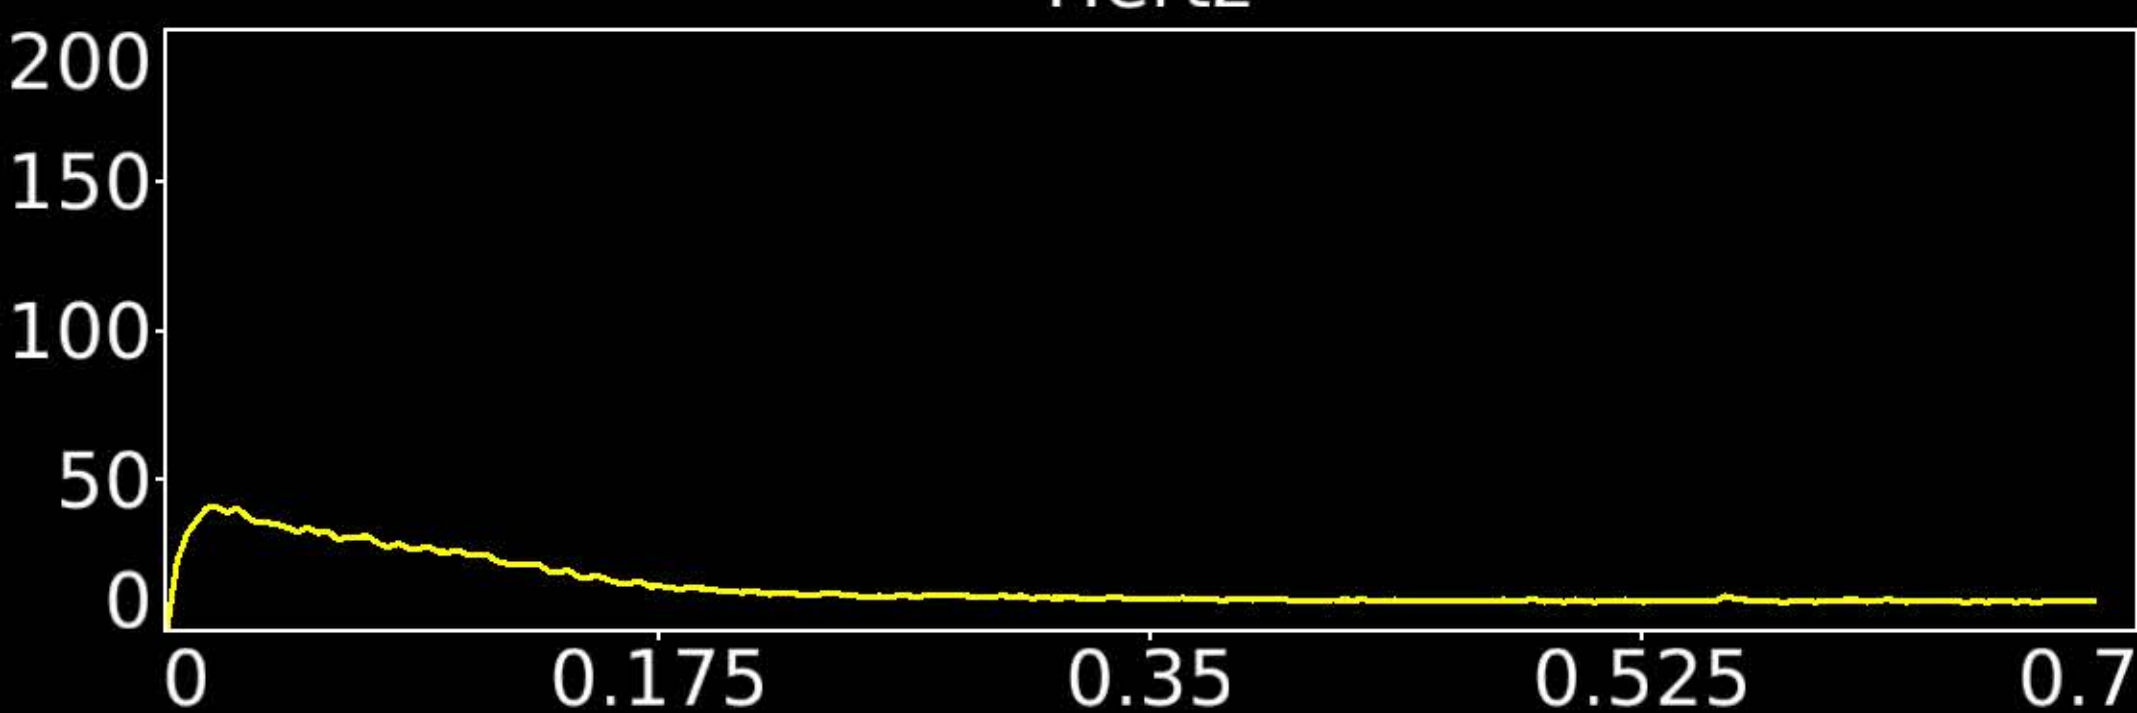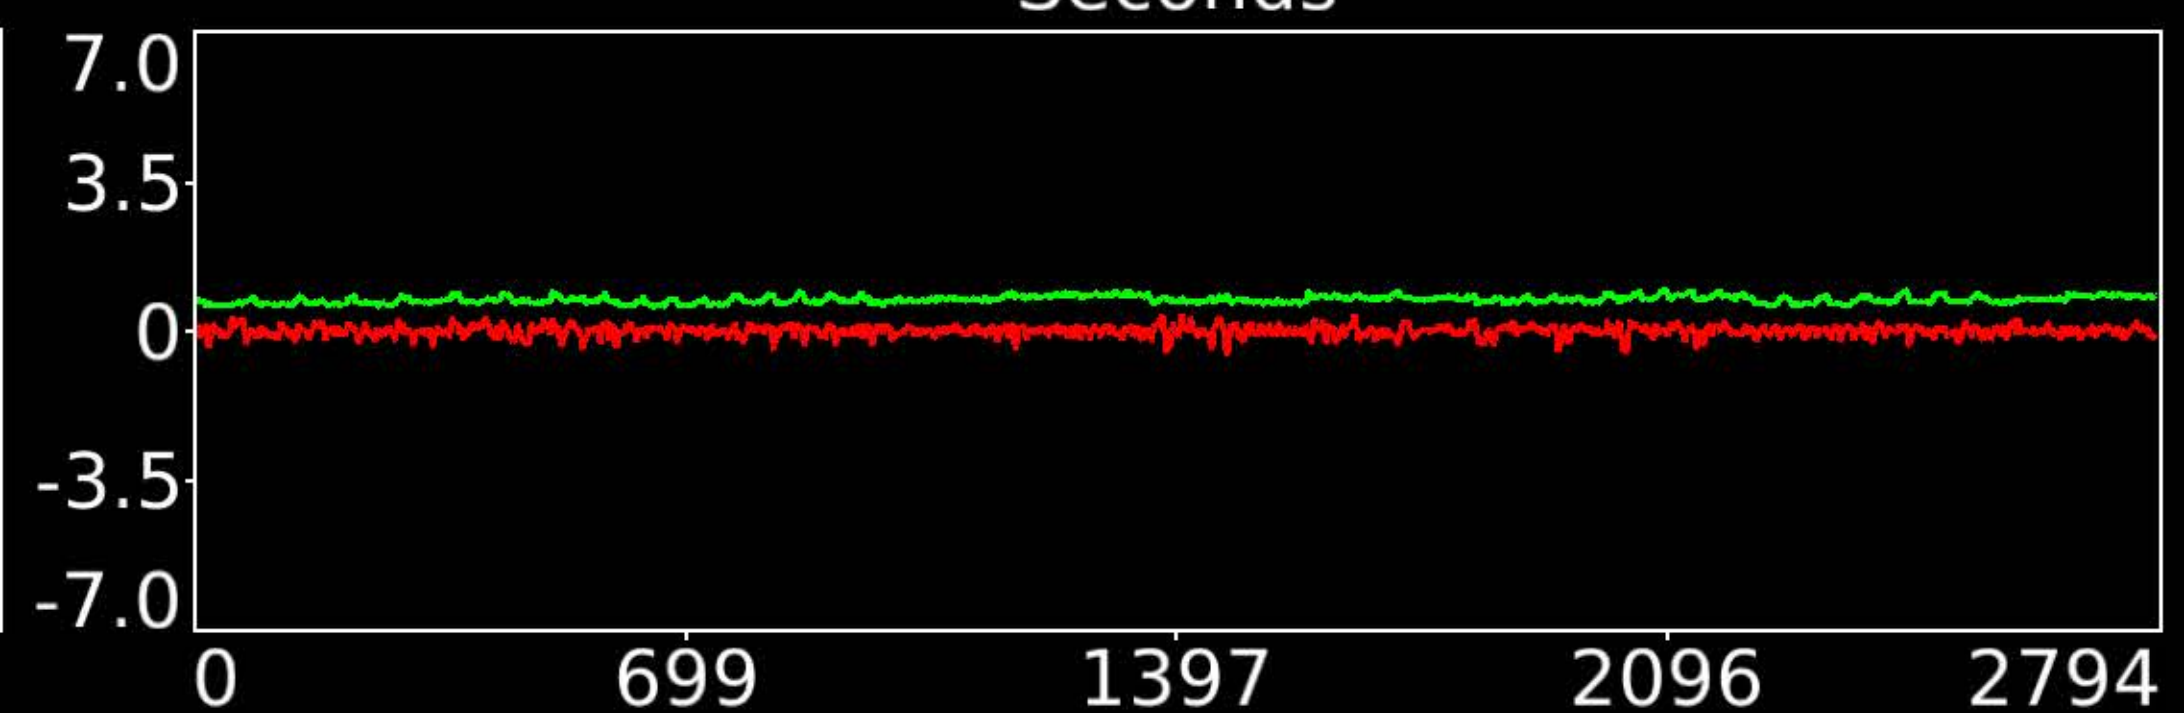

|                           |                            |                                          |  |
|---------------------------|----------------------------|------------------------------------------|--|
| Number & Class: 40 Signal |                            | Name: R Default Mode > Left Default Mode |  |
| RVT Correlated: No        | DVARS Dip Associated: No   | Cross-Subject Variable: No               |  |
| Single Subject: No        | % Variance Explained: 0.93 | Globality Index: 1.13                    |  |
| Rest Component: No        | Taskr Component: No        | Task Modulated: No                       |  |

Rationale: Spatial map includes positive and negative patches that respect known RSNs (e.g. Default Mode Network)



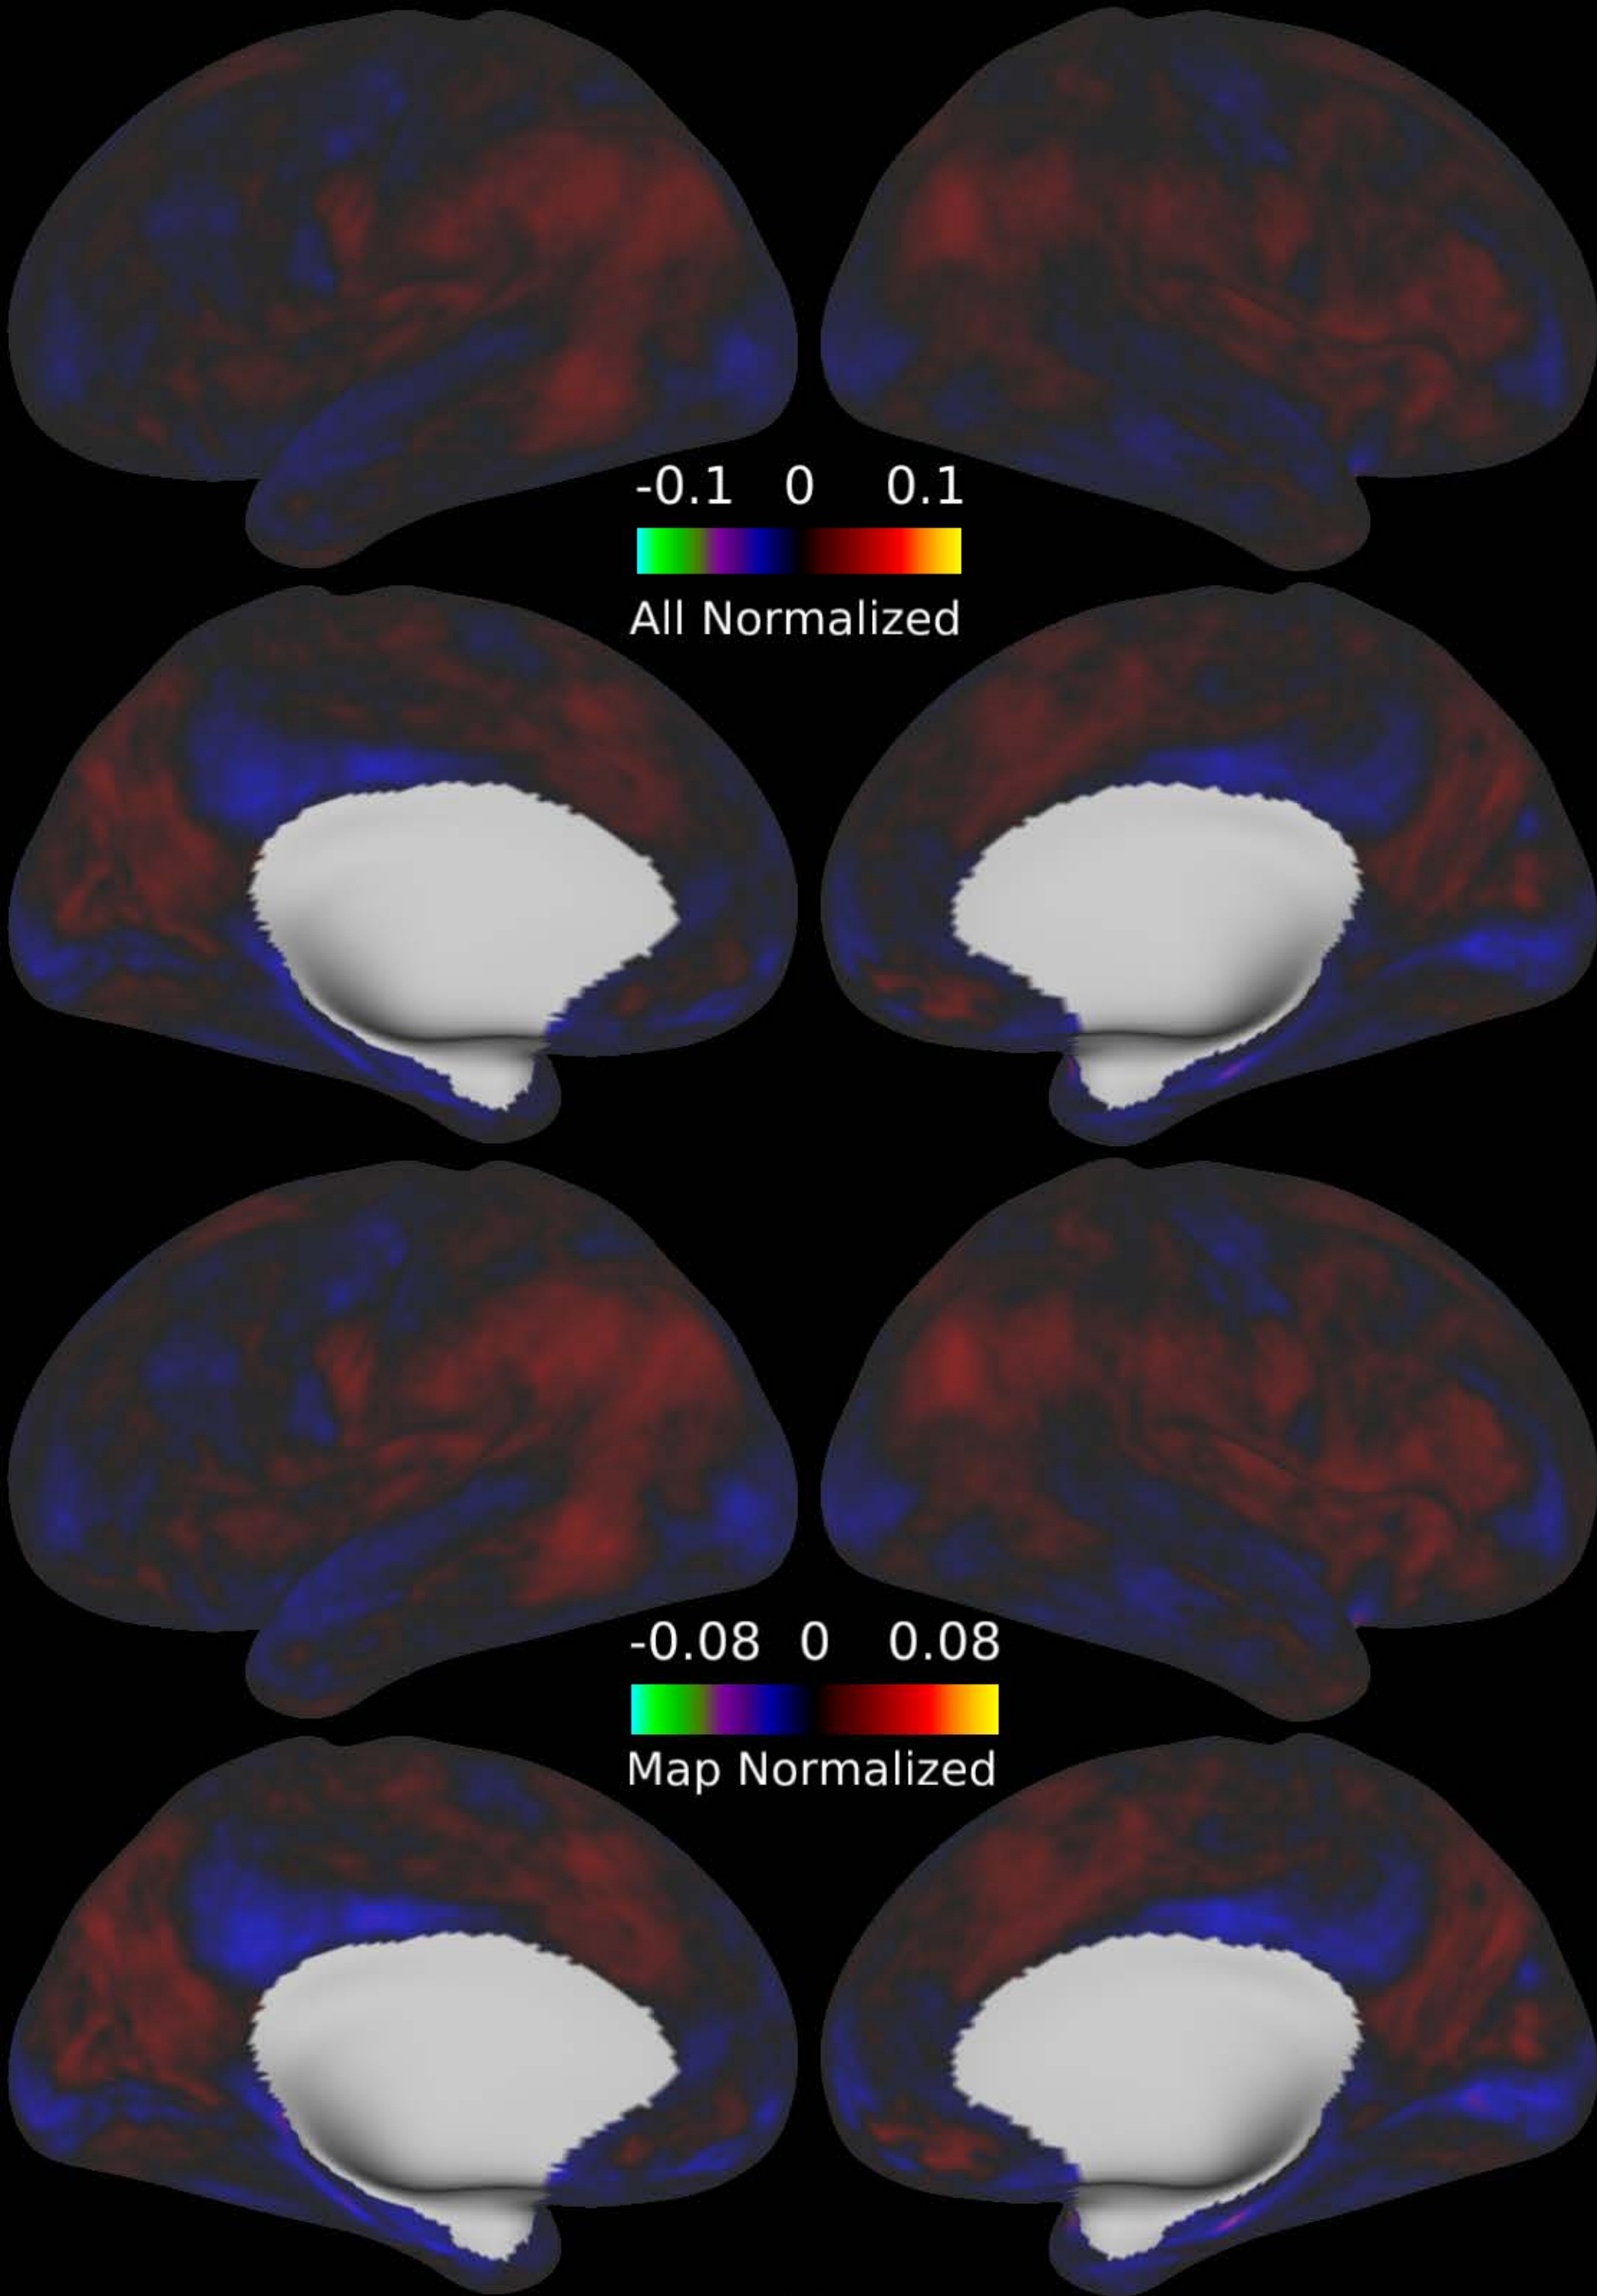

Hertz

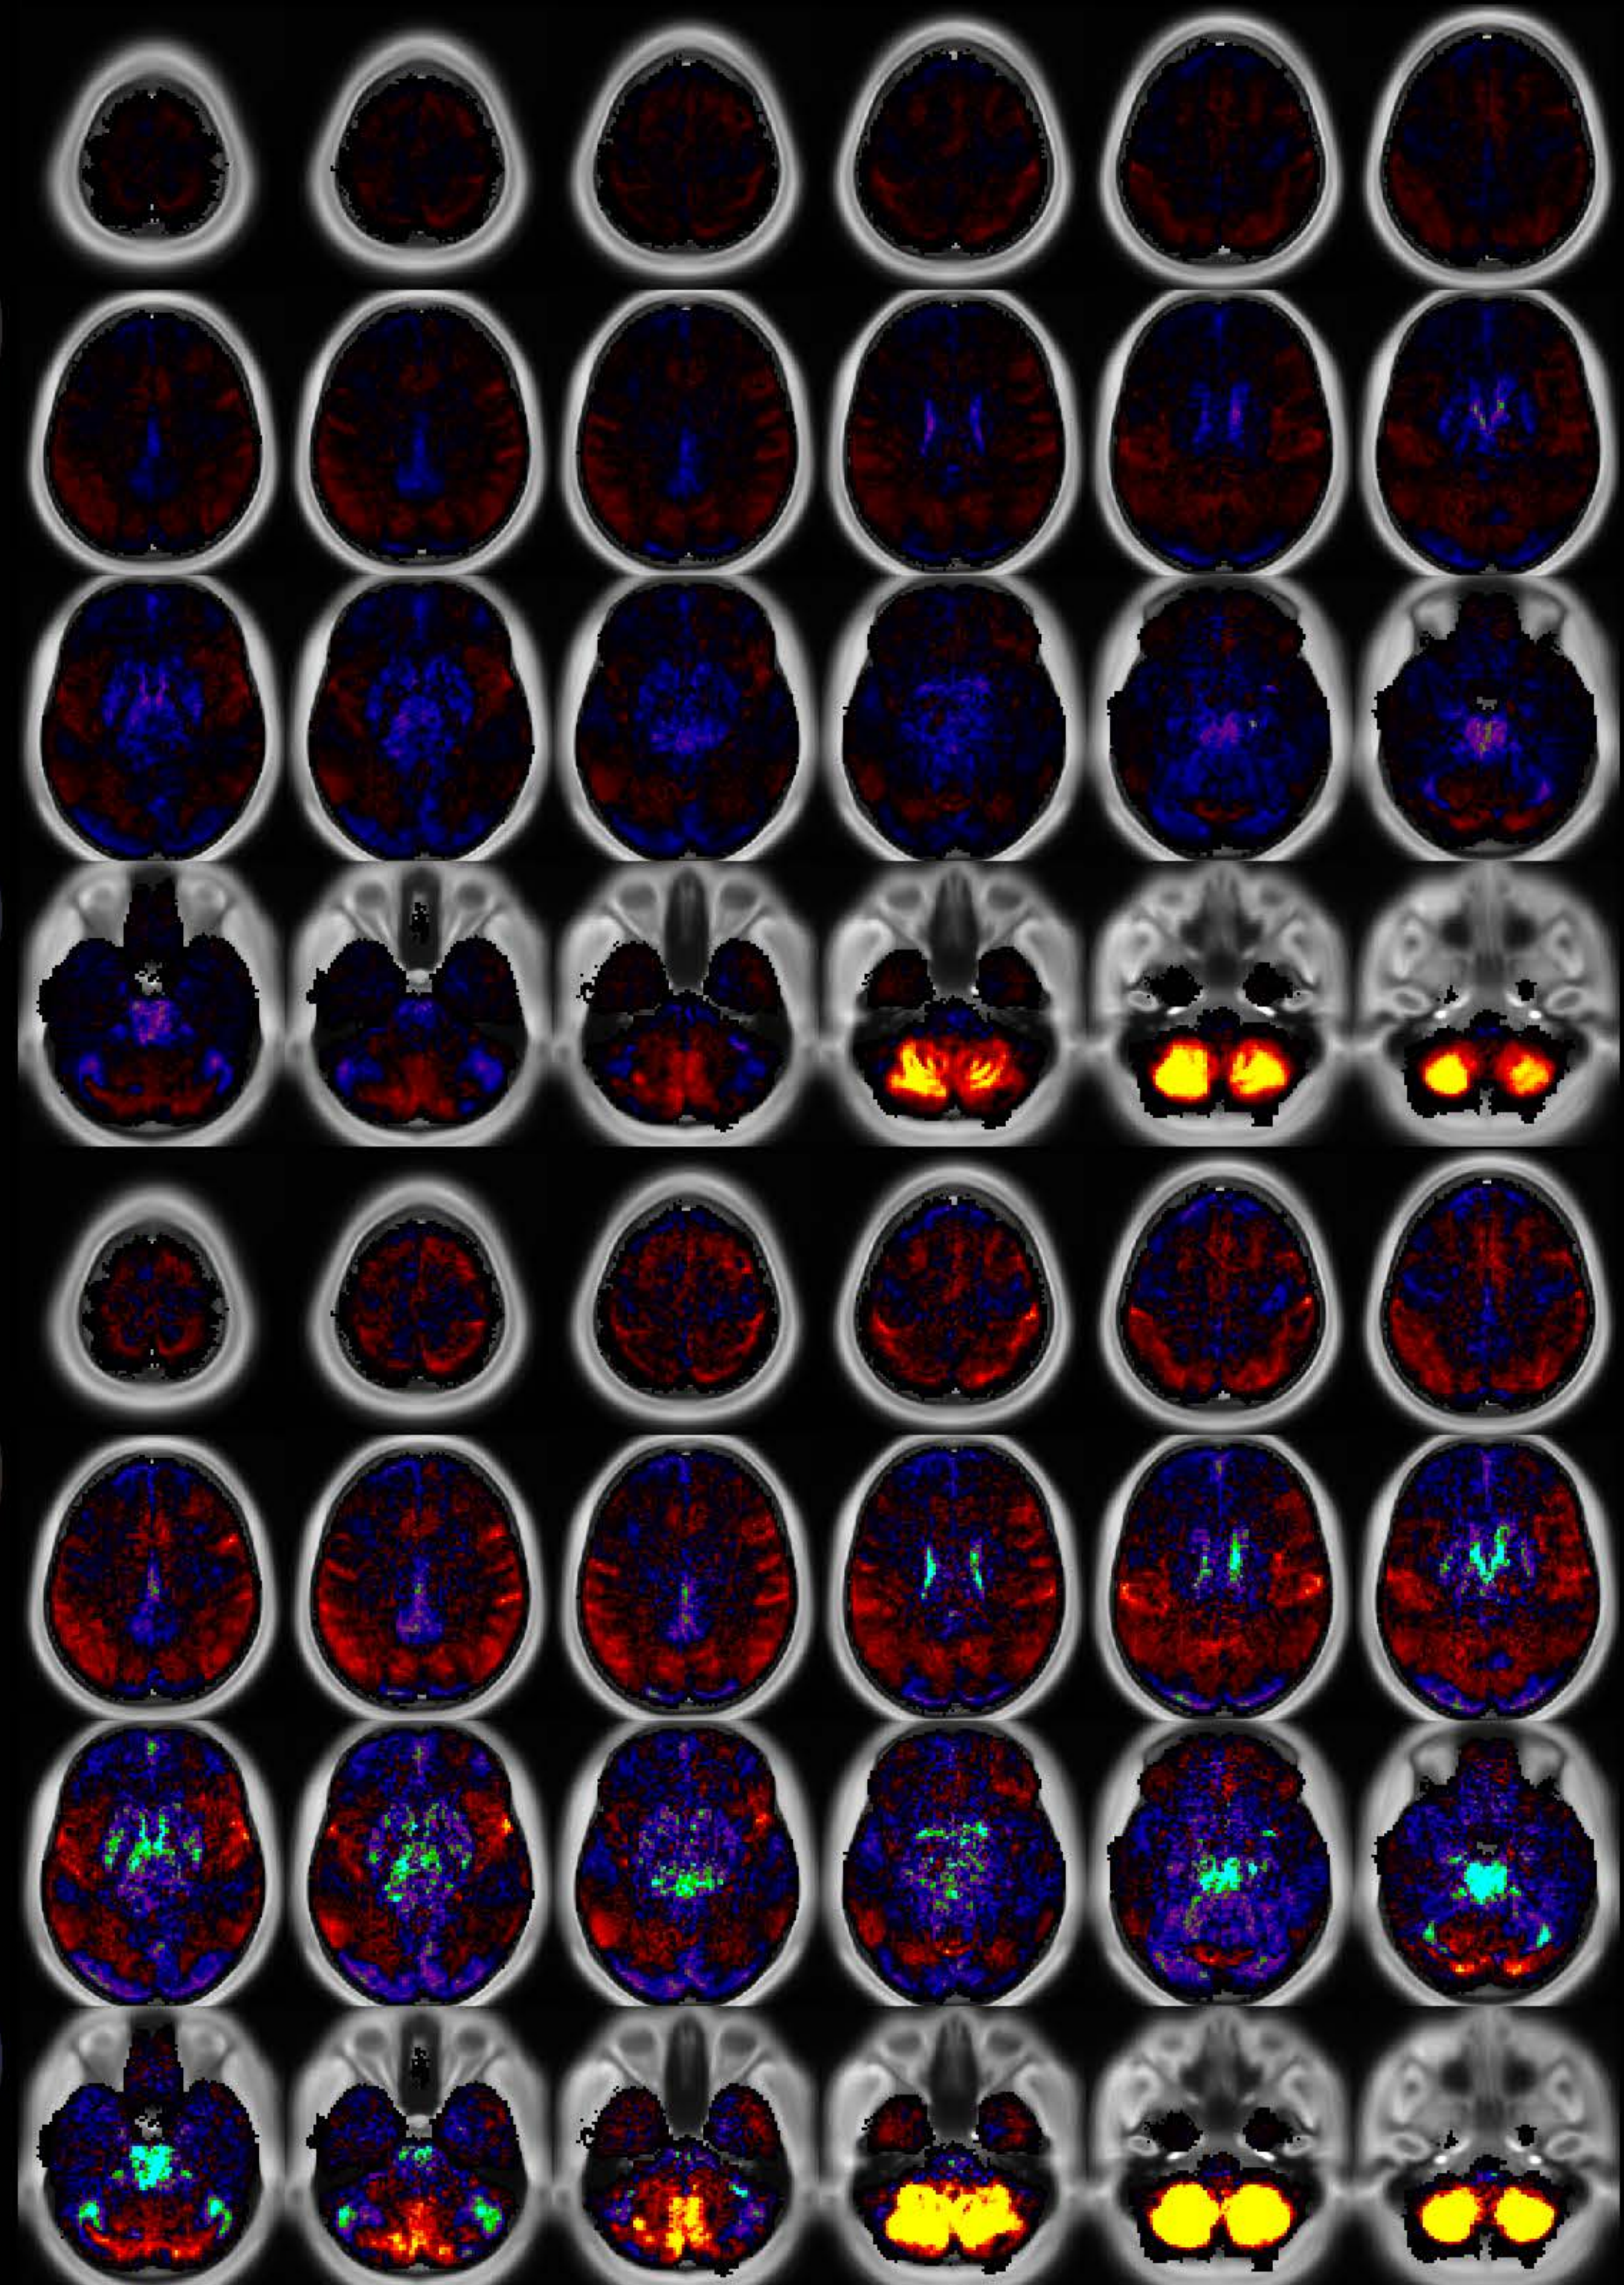

Seconds

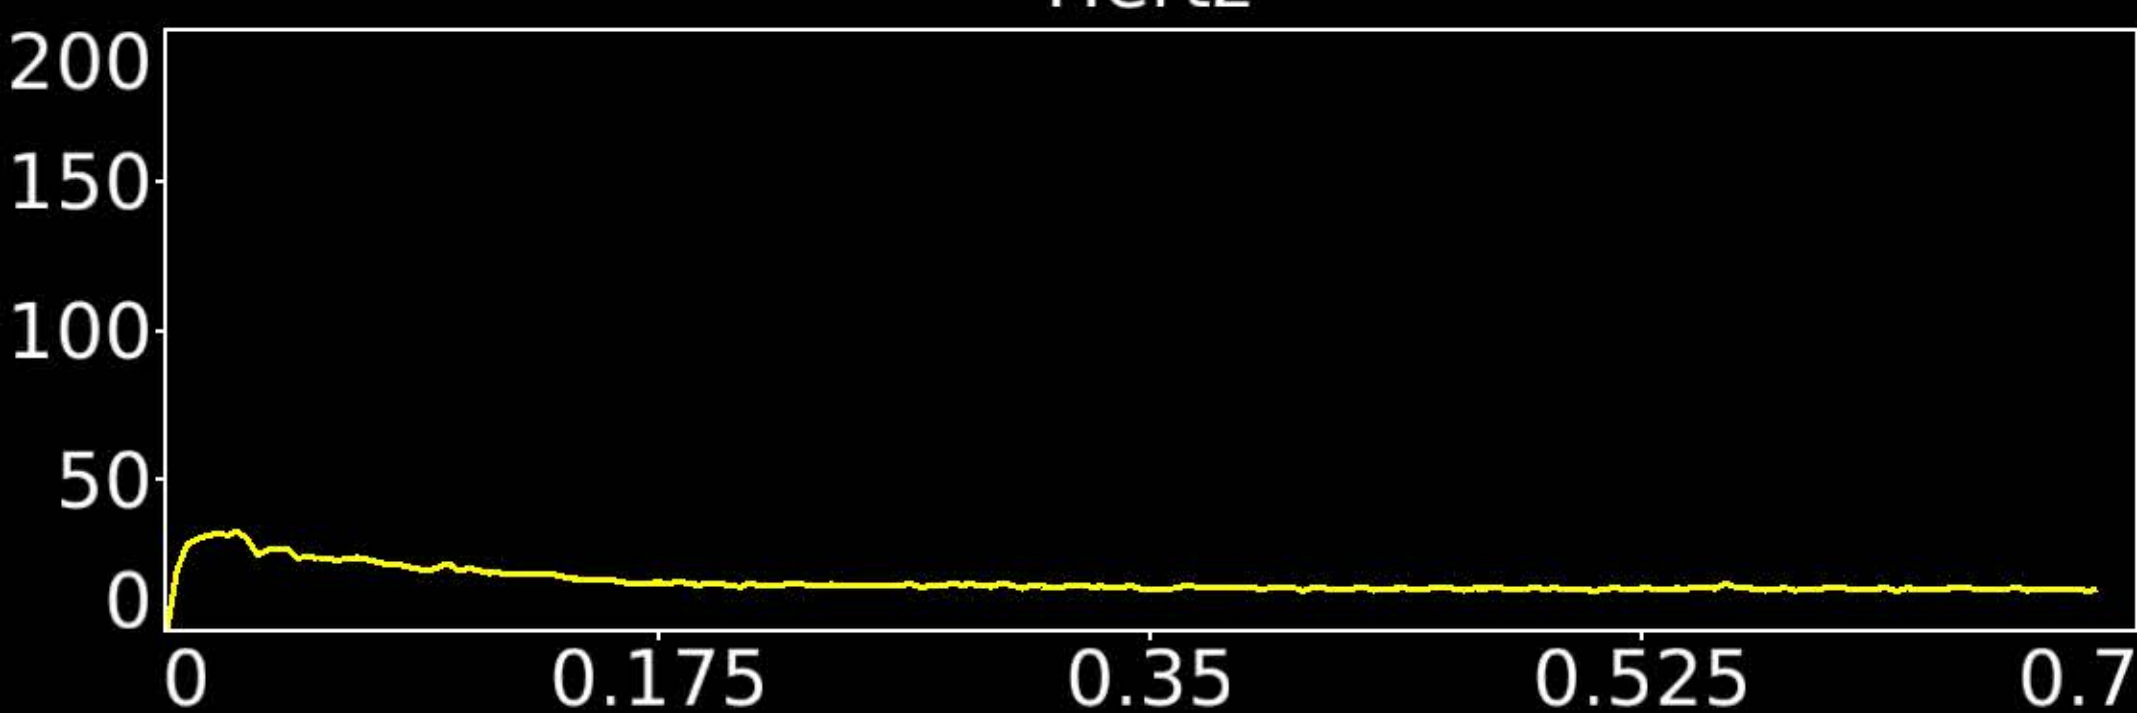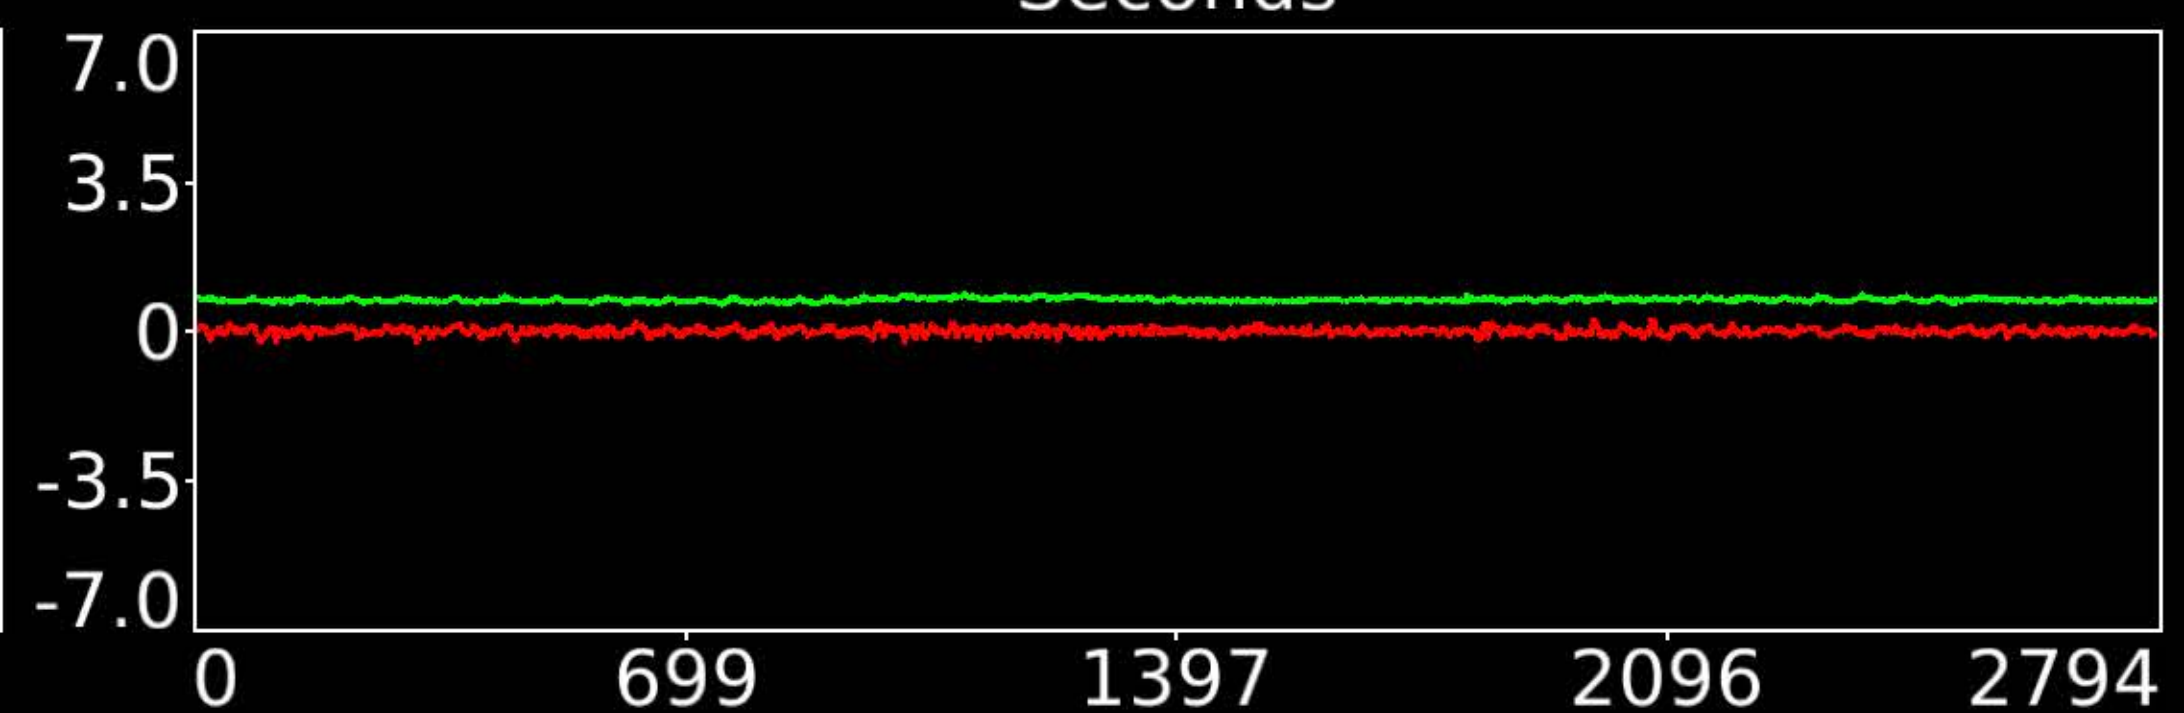

|                          |                           |                                     |  |
|--------------------------|---------------------------|-------------------------------------|--|
| Number & Class: 41 Noise |                           | Name: Bilateral Inferior Cerebellum |  |
| RVT Correlated: No       | DVARS Dip Associated: Yes | Cross-Subject Variable: Yes         |  |
| Single Subject: Yes      | % Variance Explained: 0.9 | Globality Index: 0.09               |  |
| Rest Component: No       | Taskr Component: 33       | Task Modulated: No                  |  |

Rationale: Component is DVARS Dips associated and single subject; perhaps related to motion; reconstruction artifact; or unstructured noise



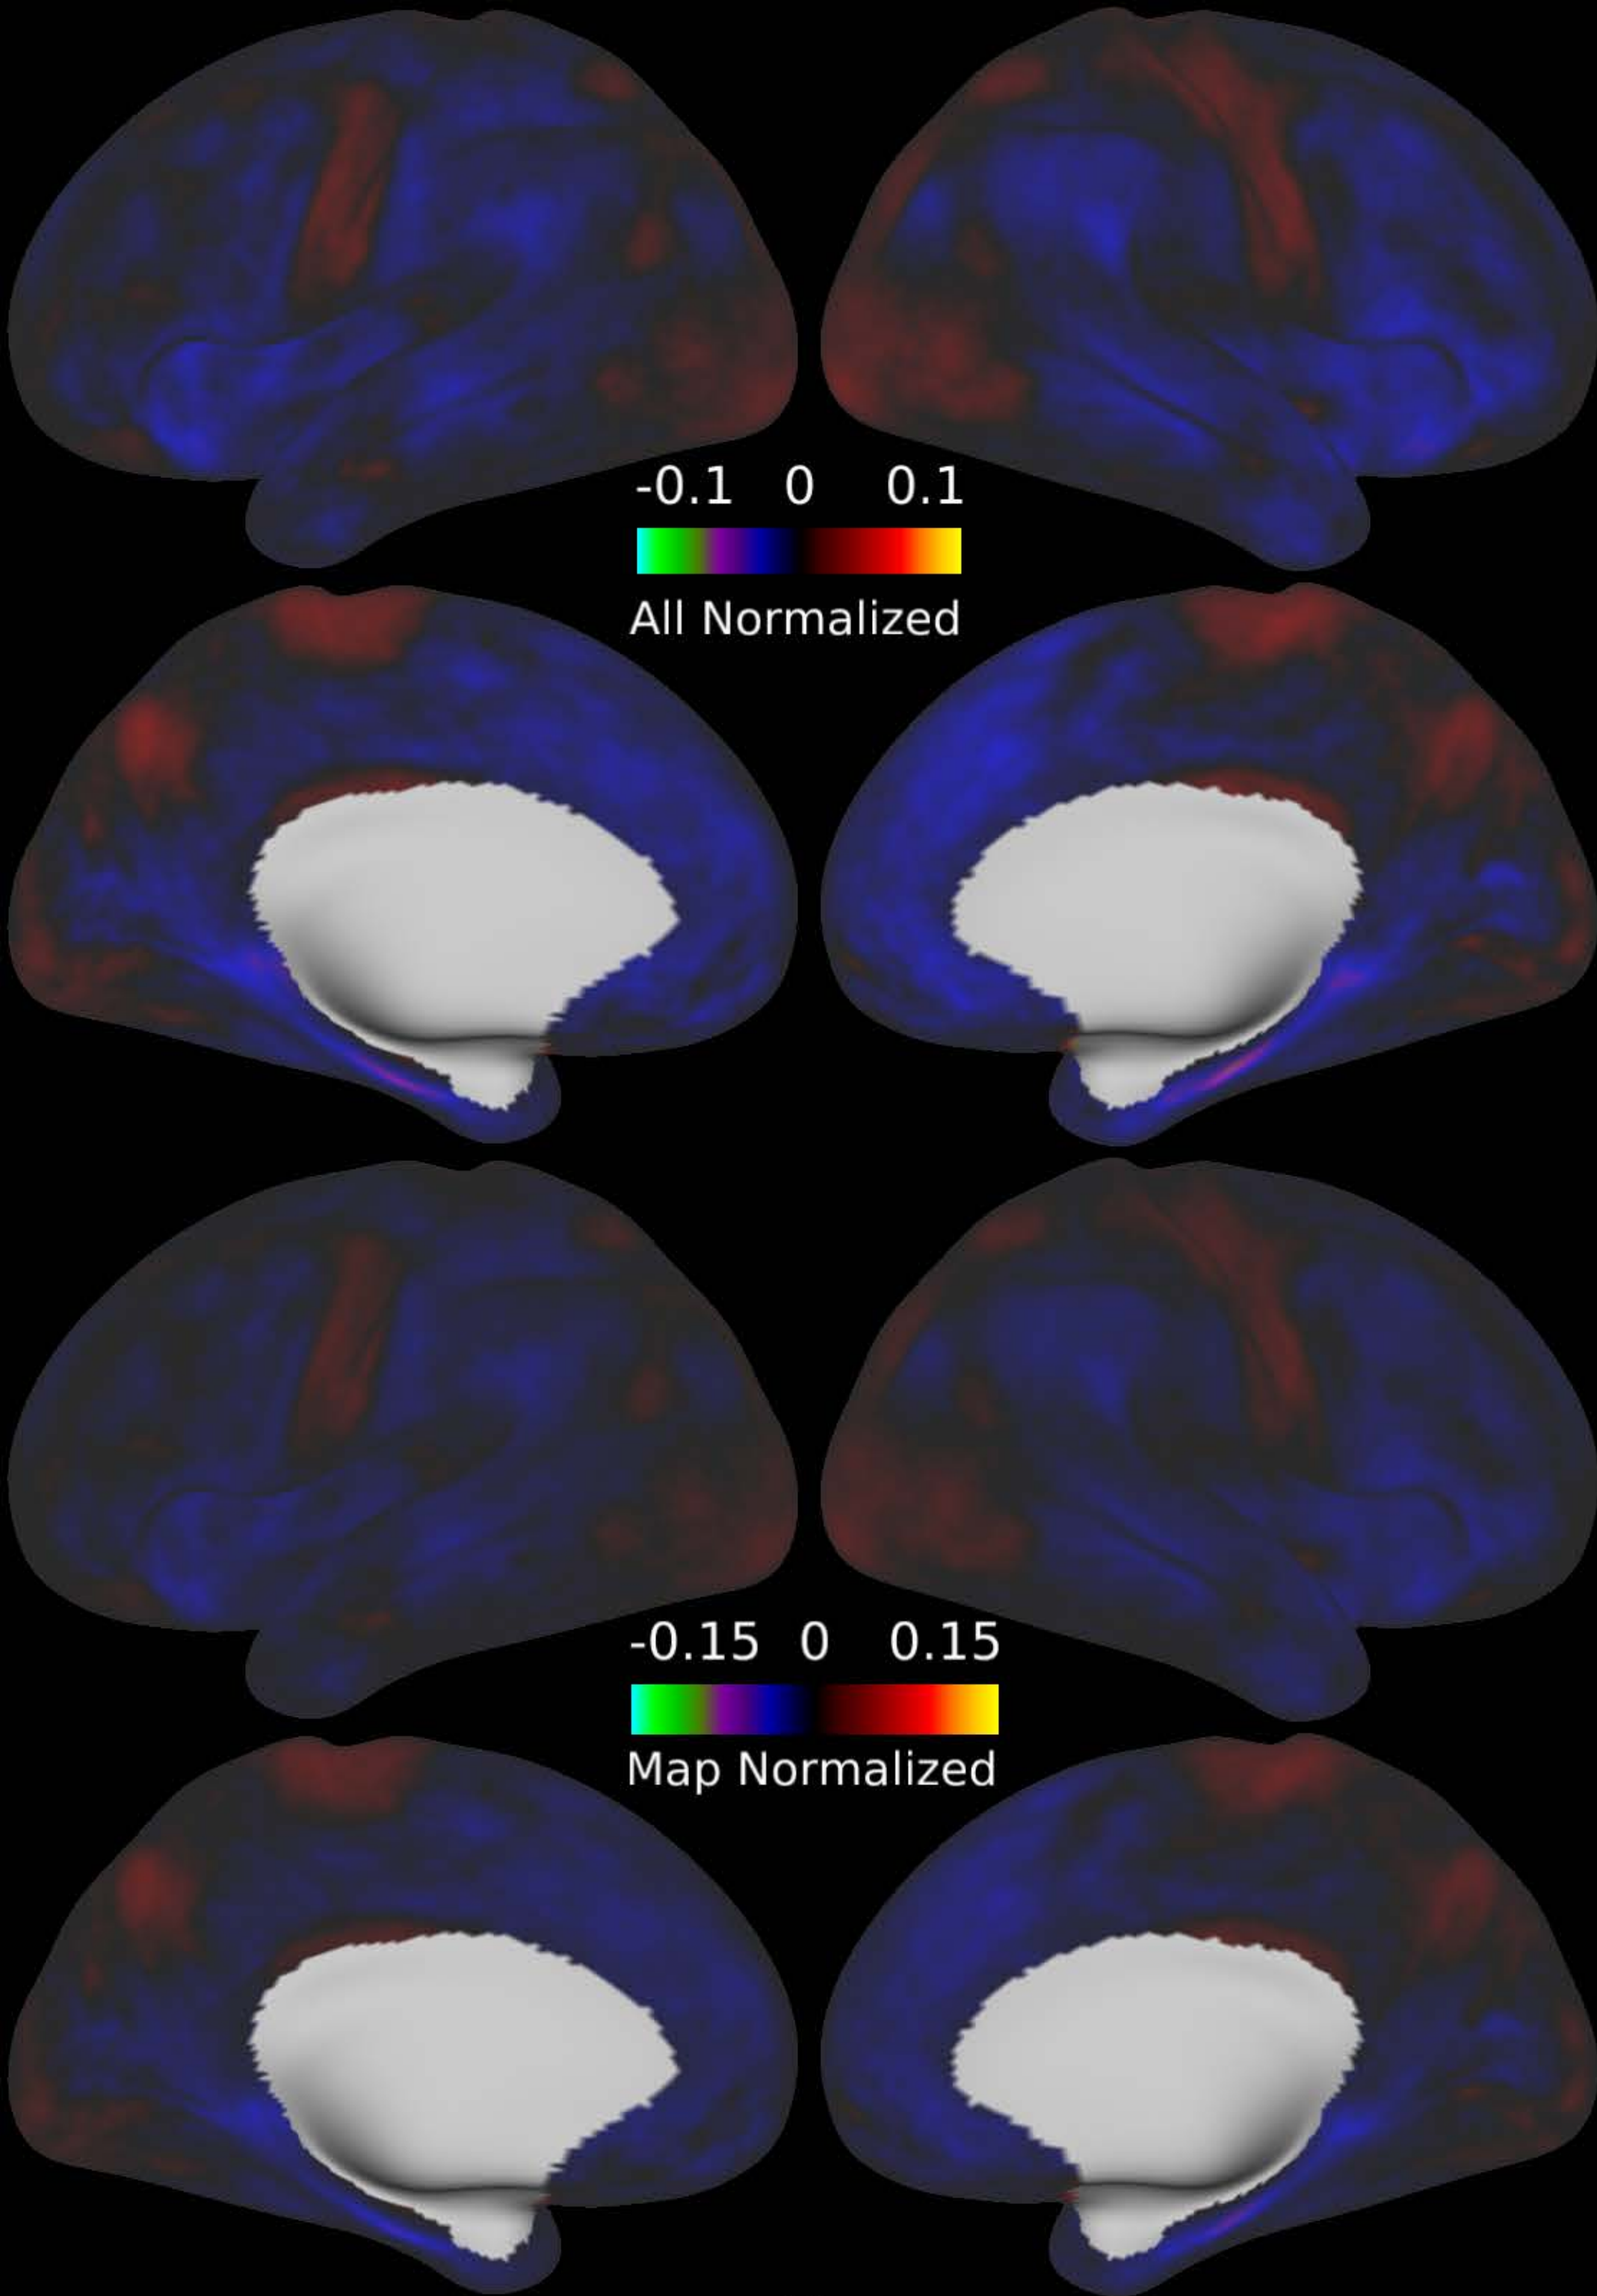

Hertz

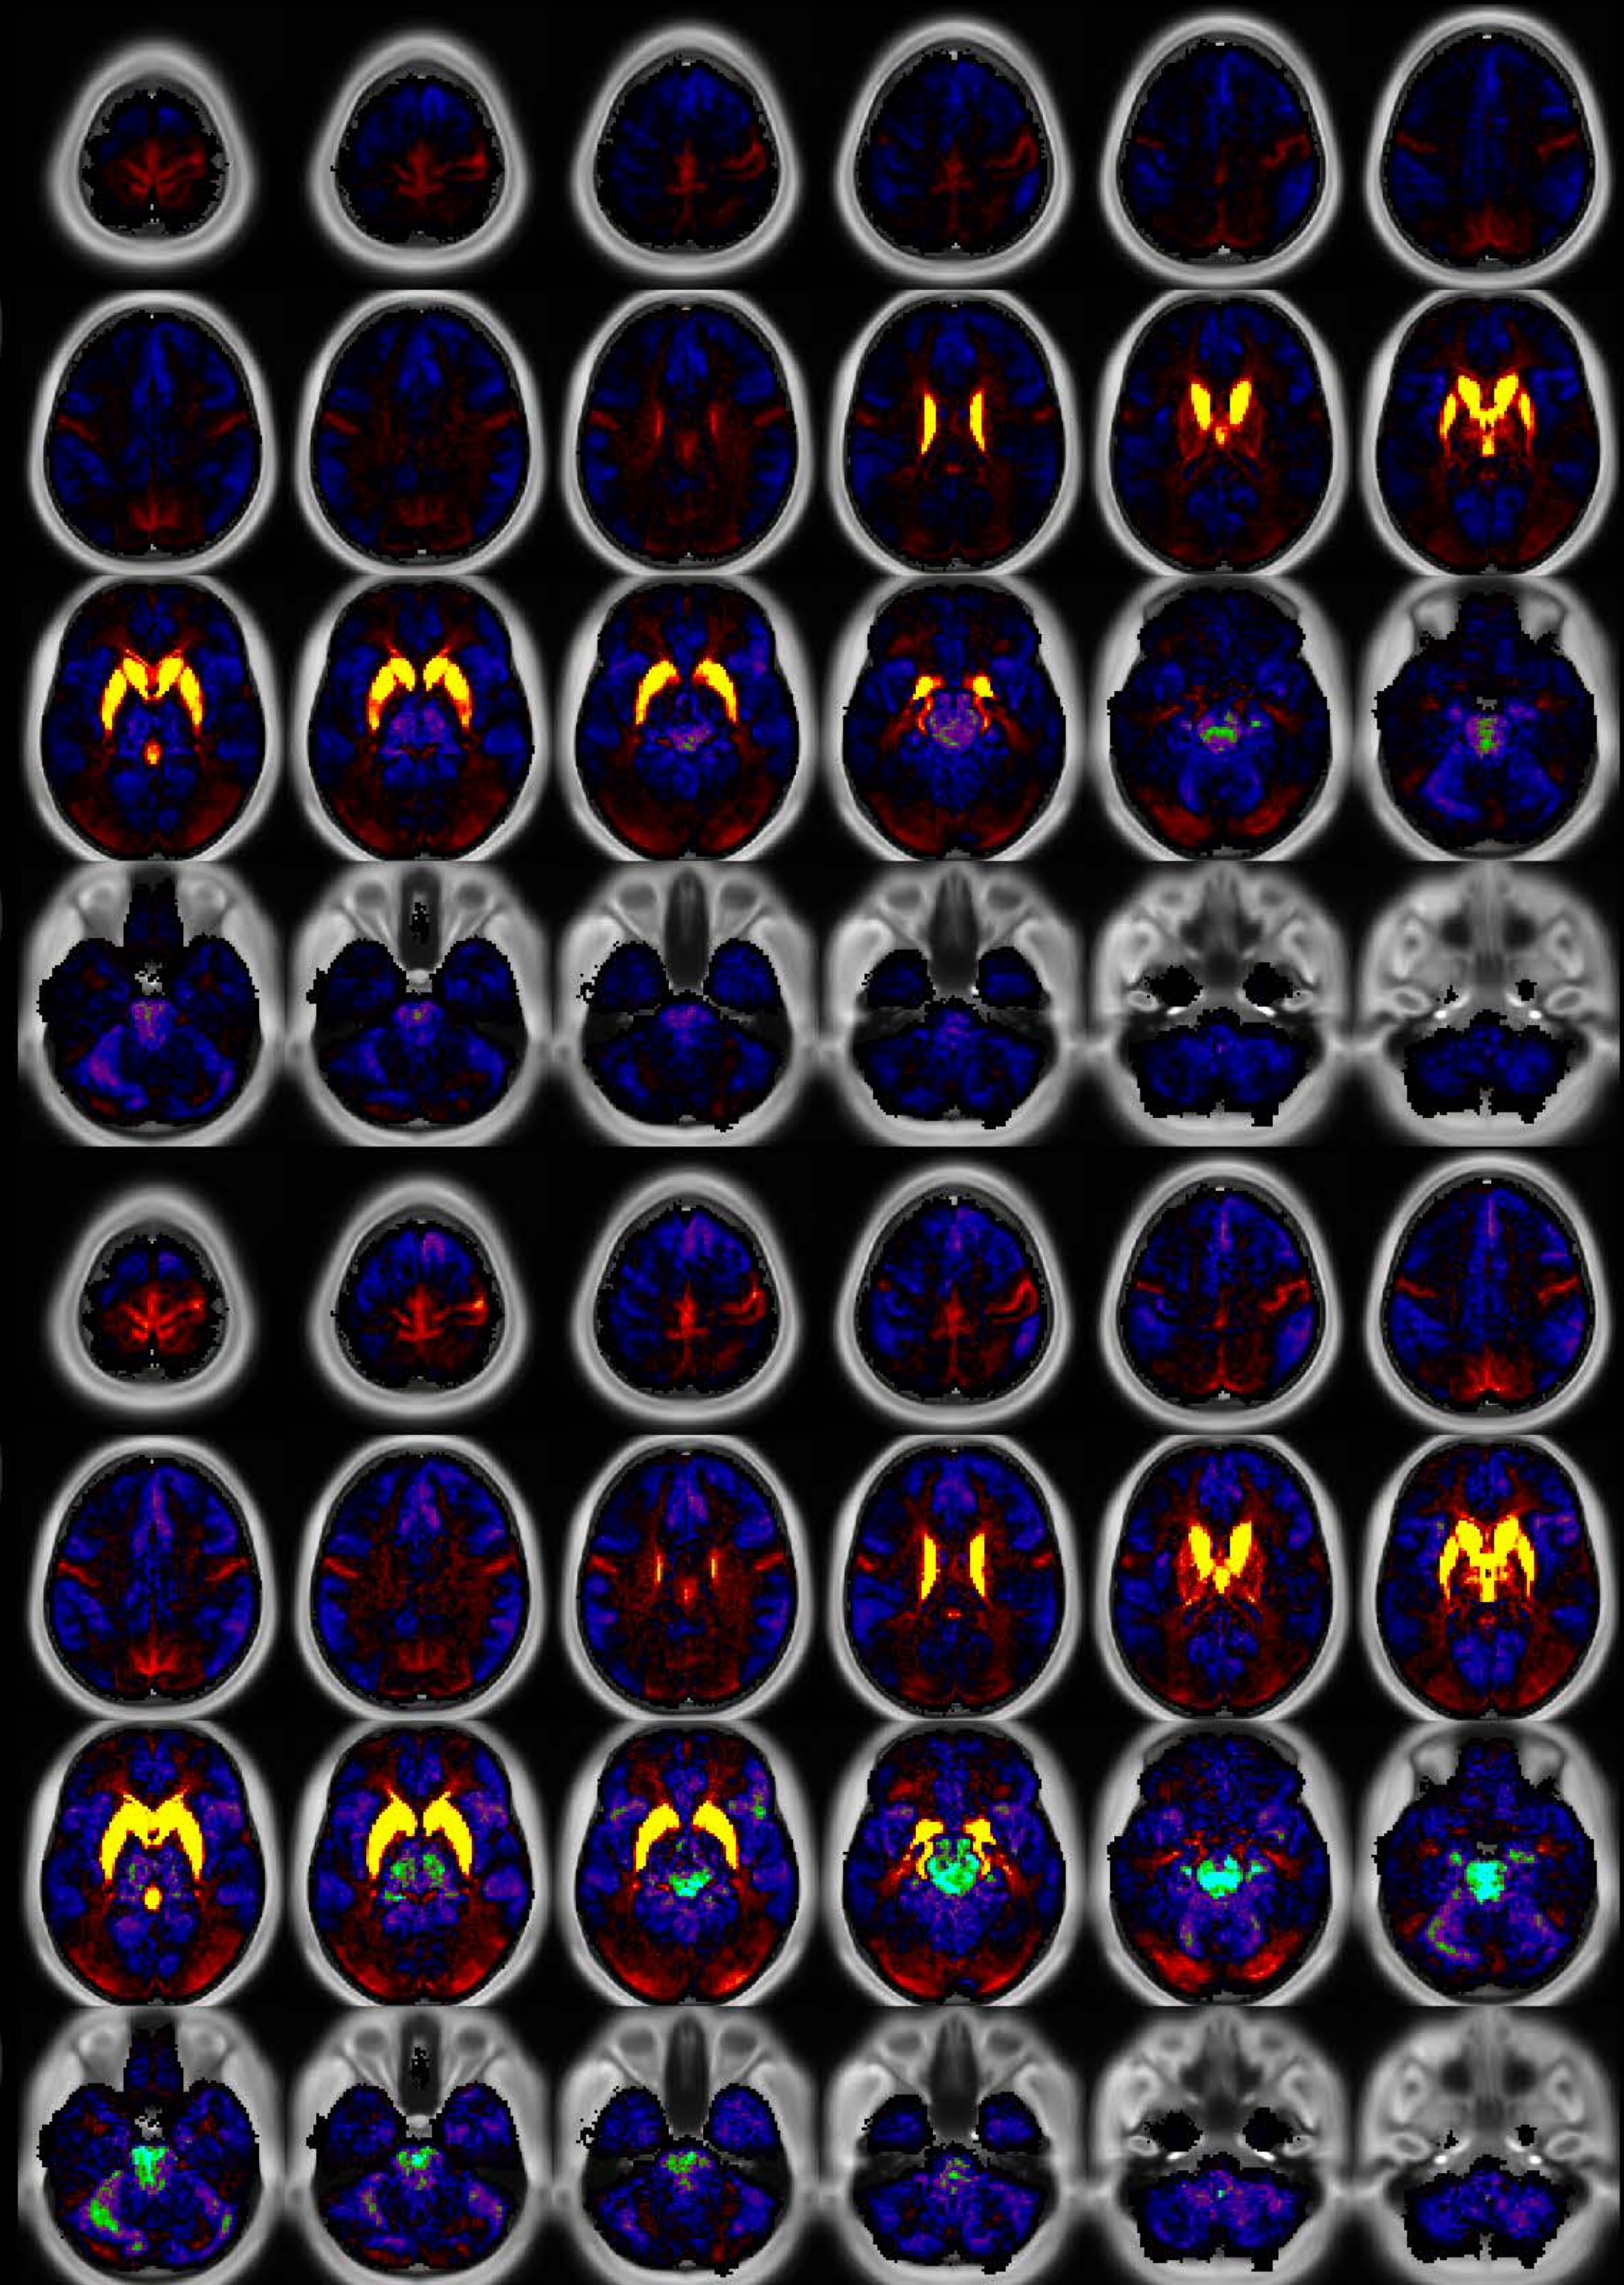

Seconds

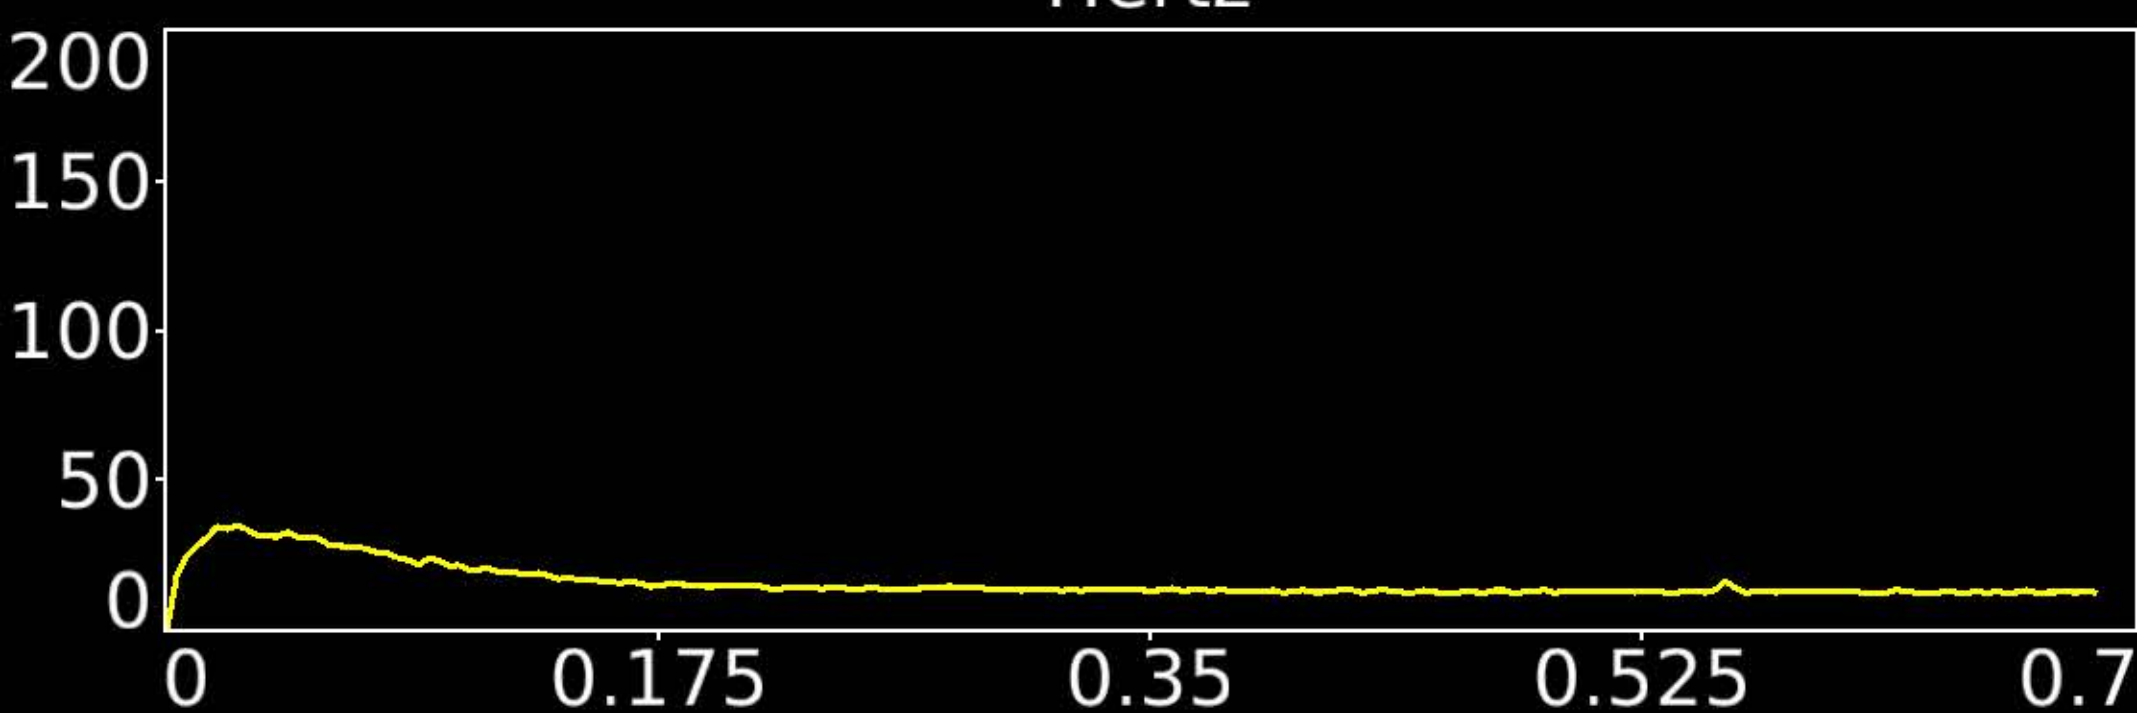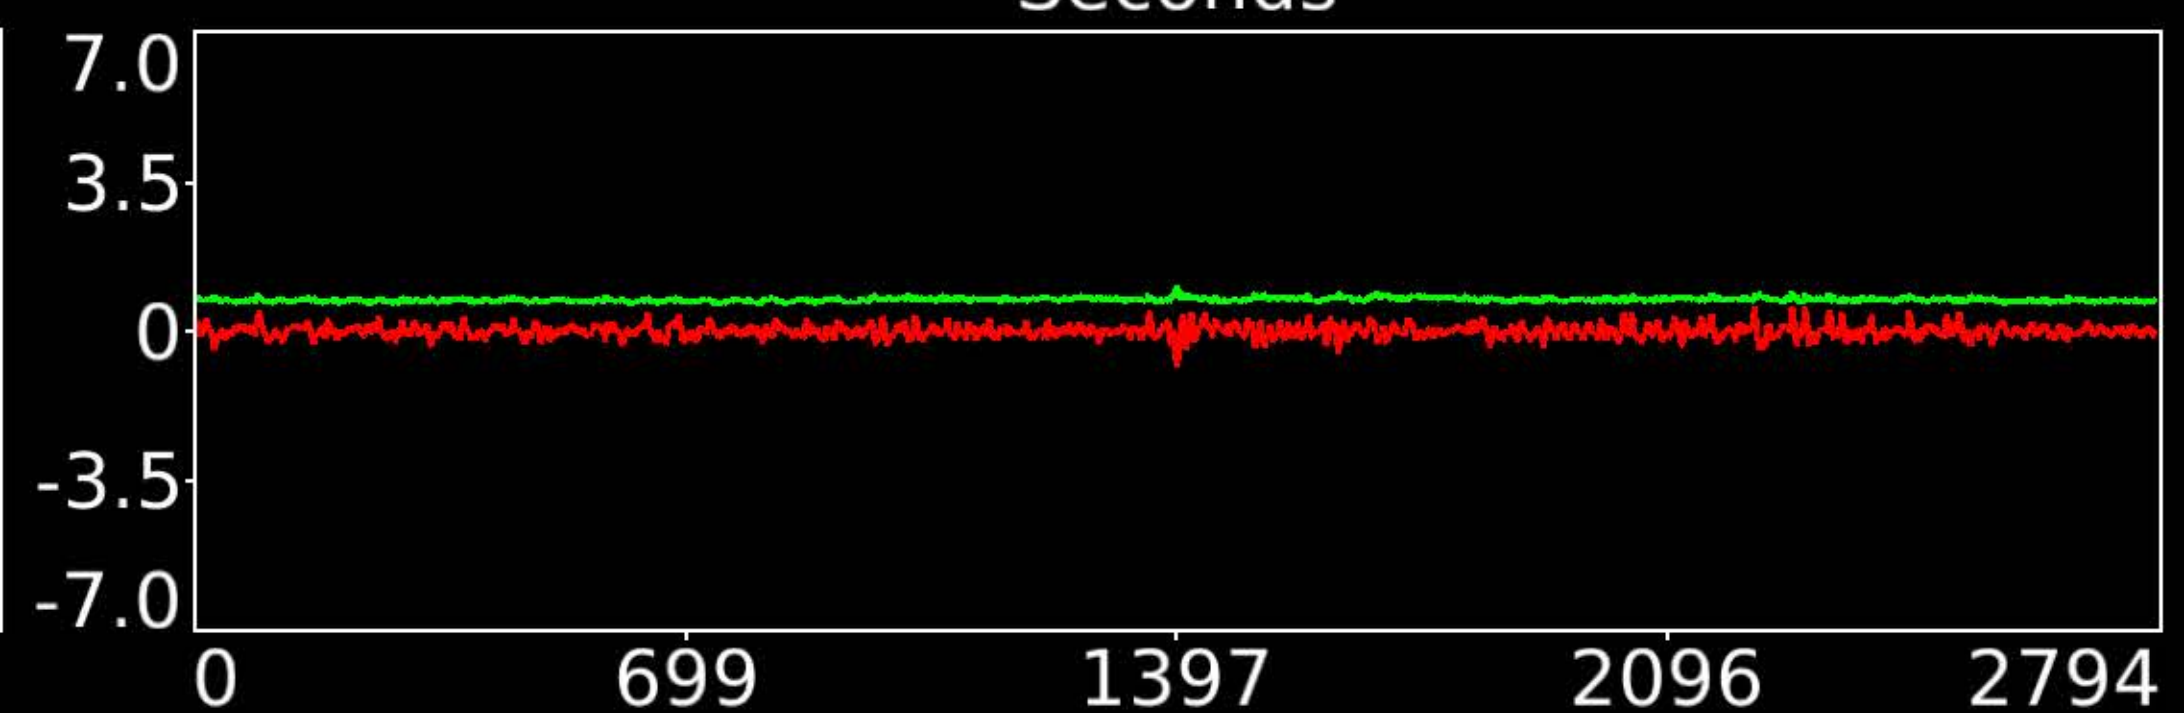

|                          |                            |                                                    |  |
|--------------------------|----------------------------|----------------------------------------------------|--|
| Number & Class: 42 Noise |                            | Name: Striatum and Dorsal + Anterior Thalamus + WM |  |
| RVT Correlated: No       | DVARS Dip Associated: No   | Cross-Subject Variable: No                         |  |
| Single Subject: No       | % Variance Explained: 0.91 | Globality Index: 1.48                              |  |
| Rest Component: 44       | Taskr Component: 36        | Task Modulated: No                                 |  |

Rationale: Controversial: Diencephalon together with surrounding white matter positive vs rest of brain negative; could be due to differing vascular supplies



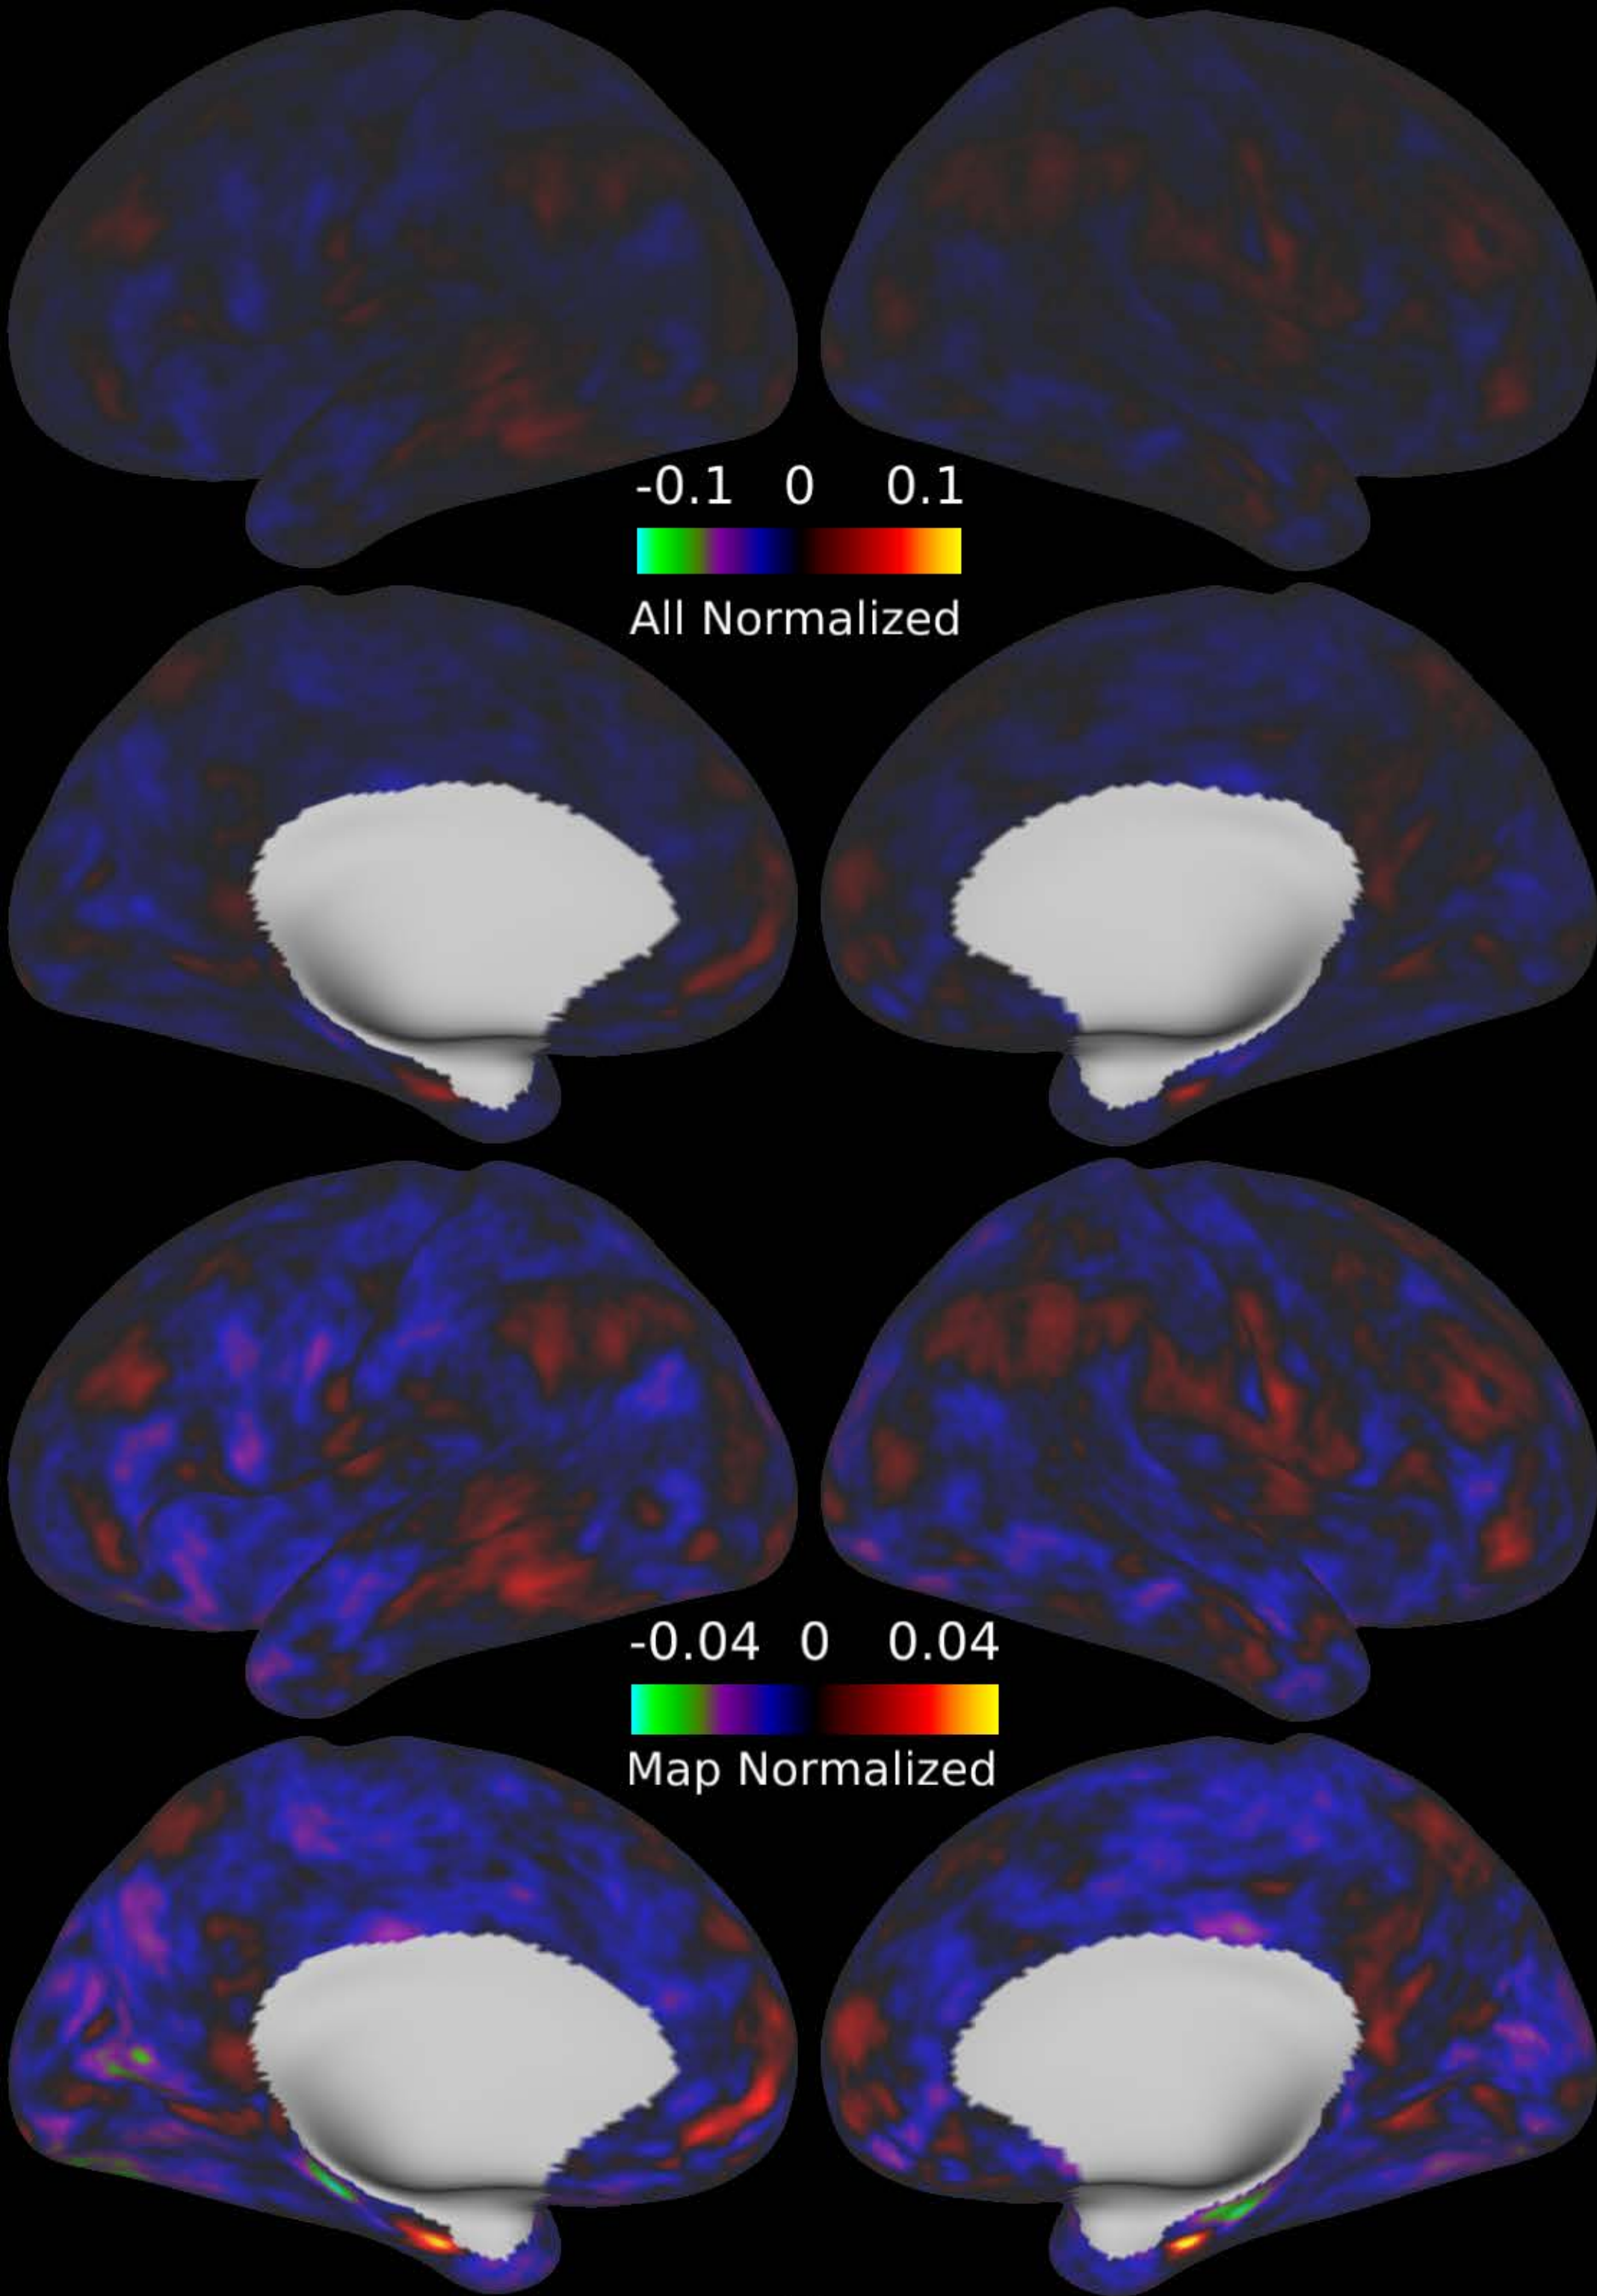

Hertz

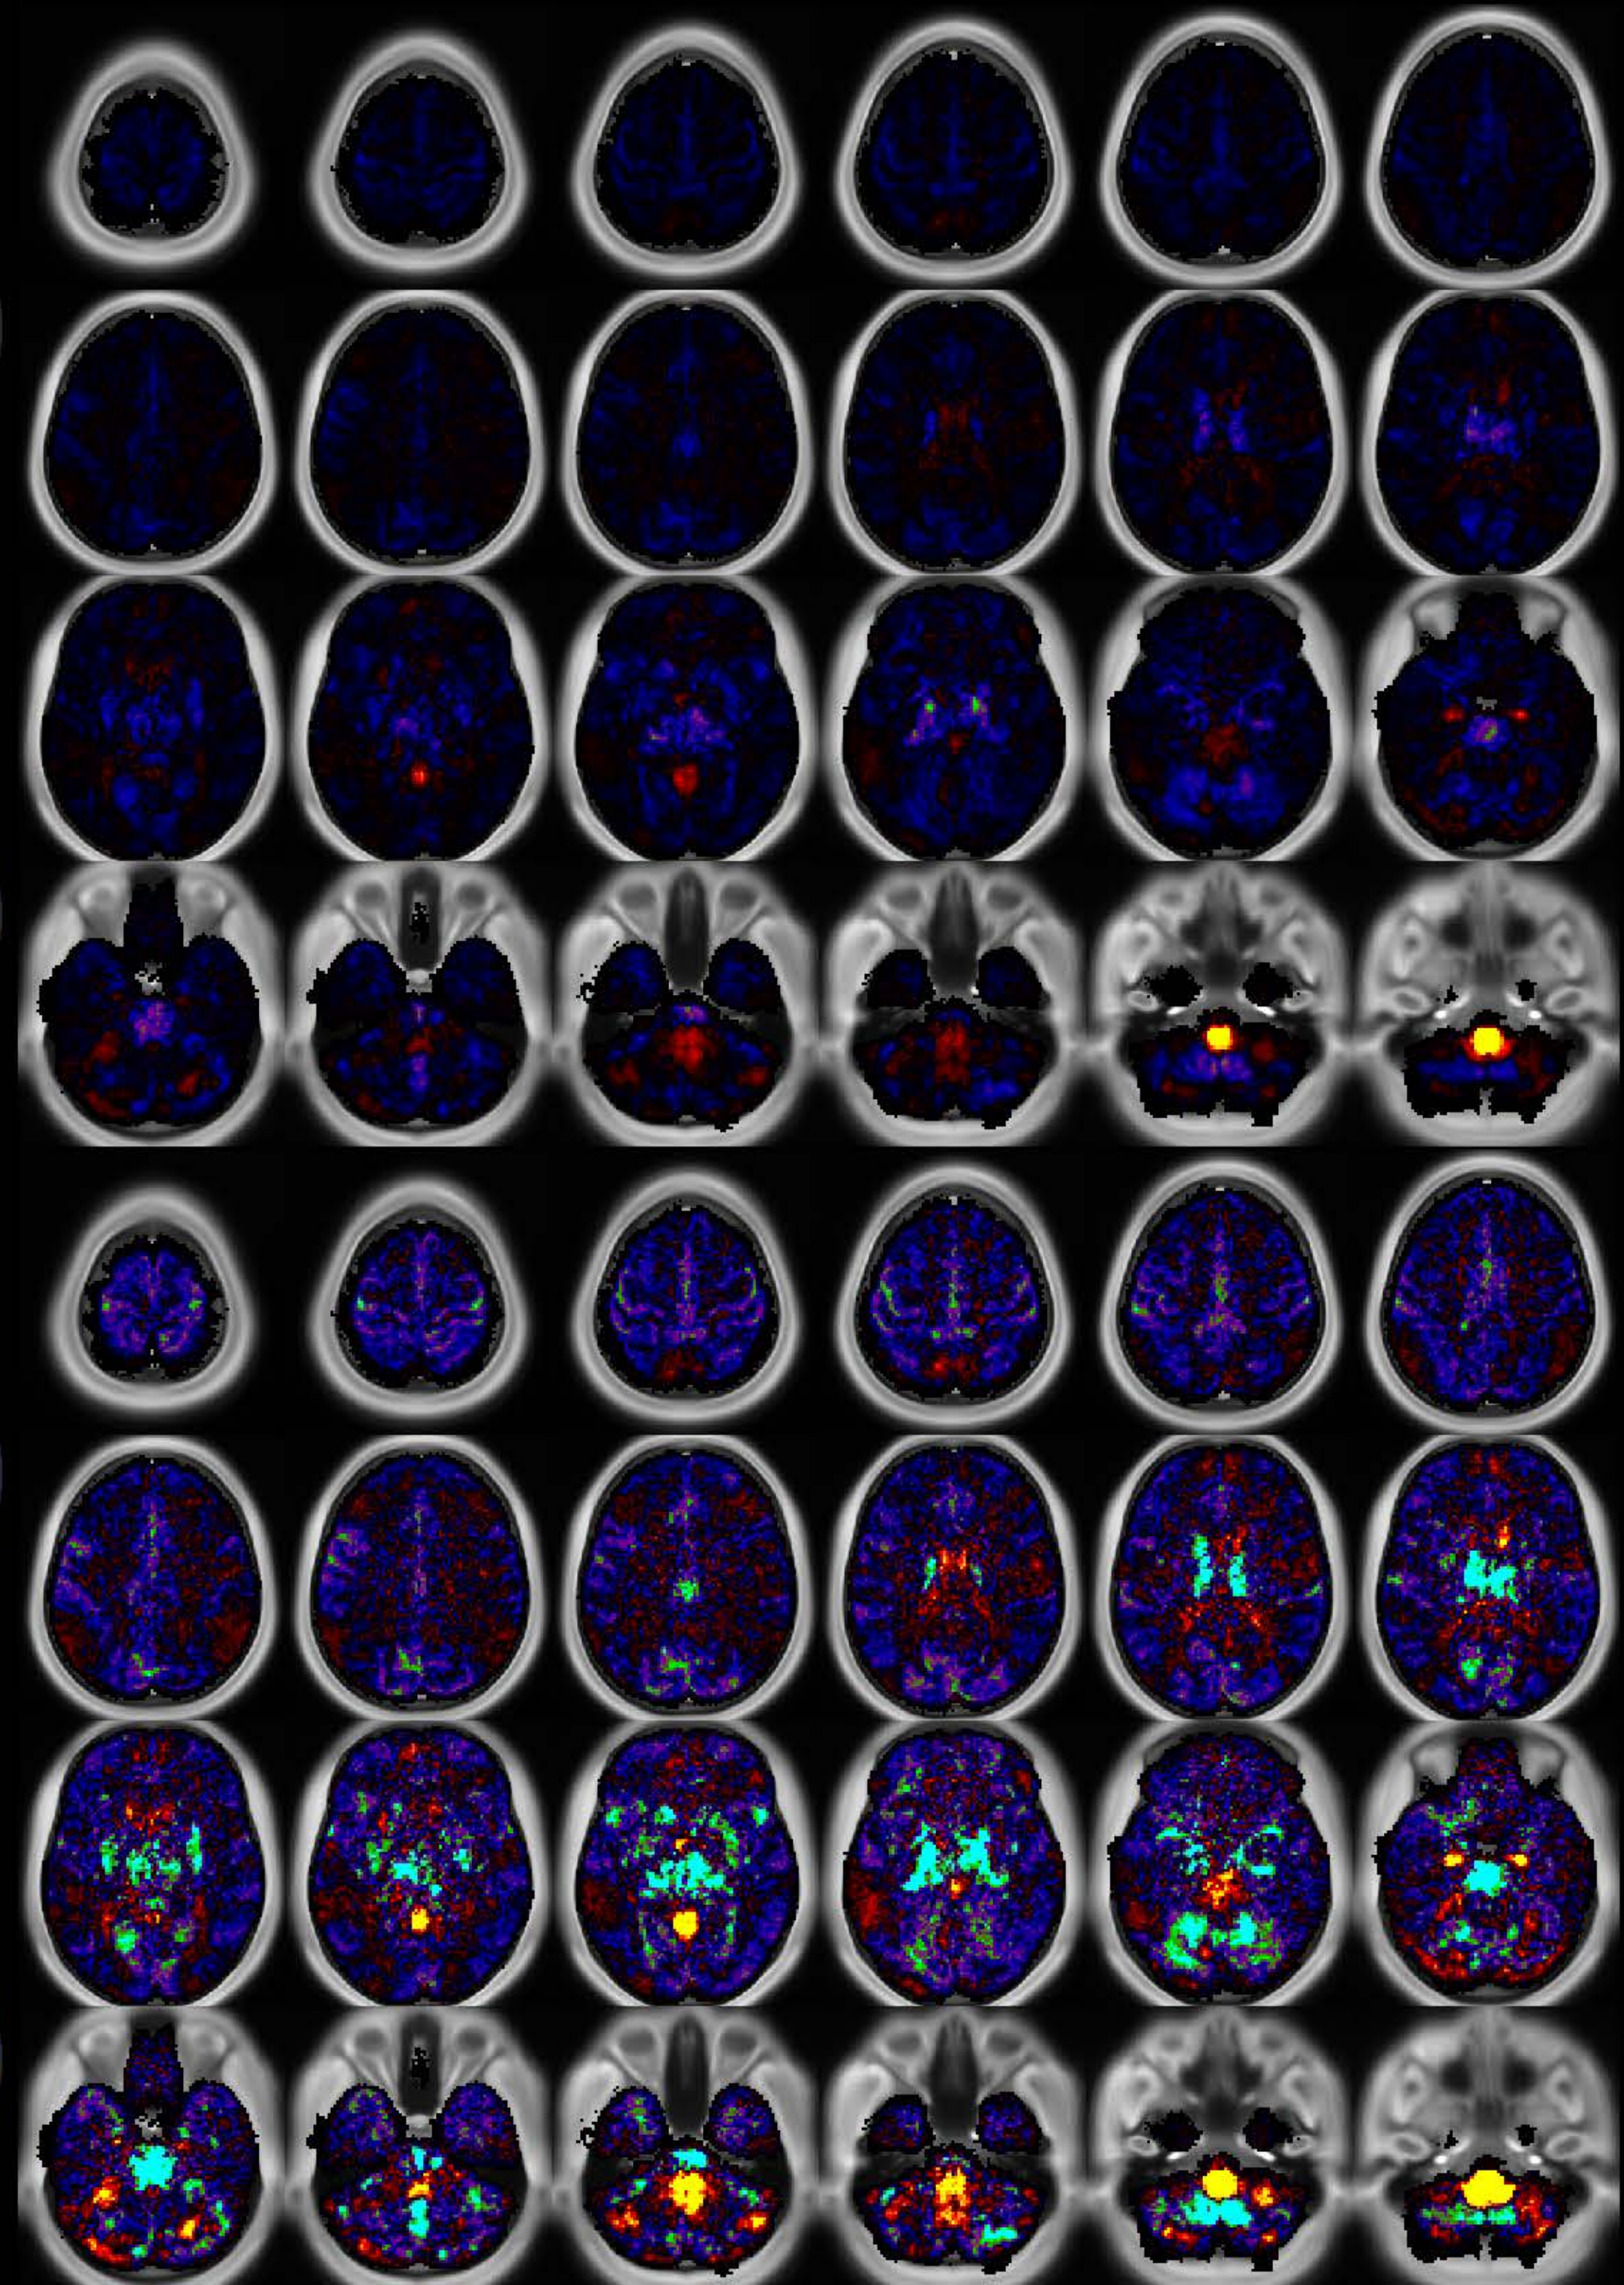

Seconds

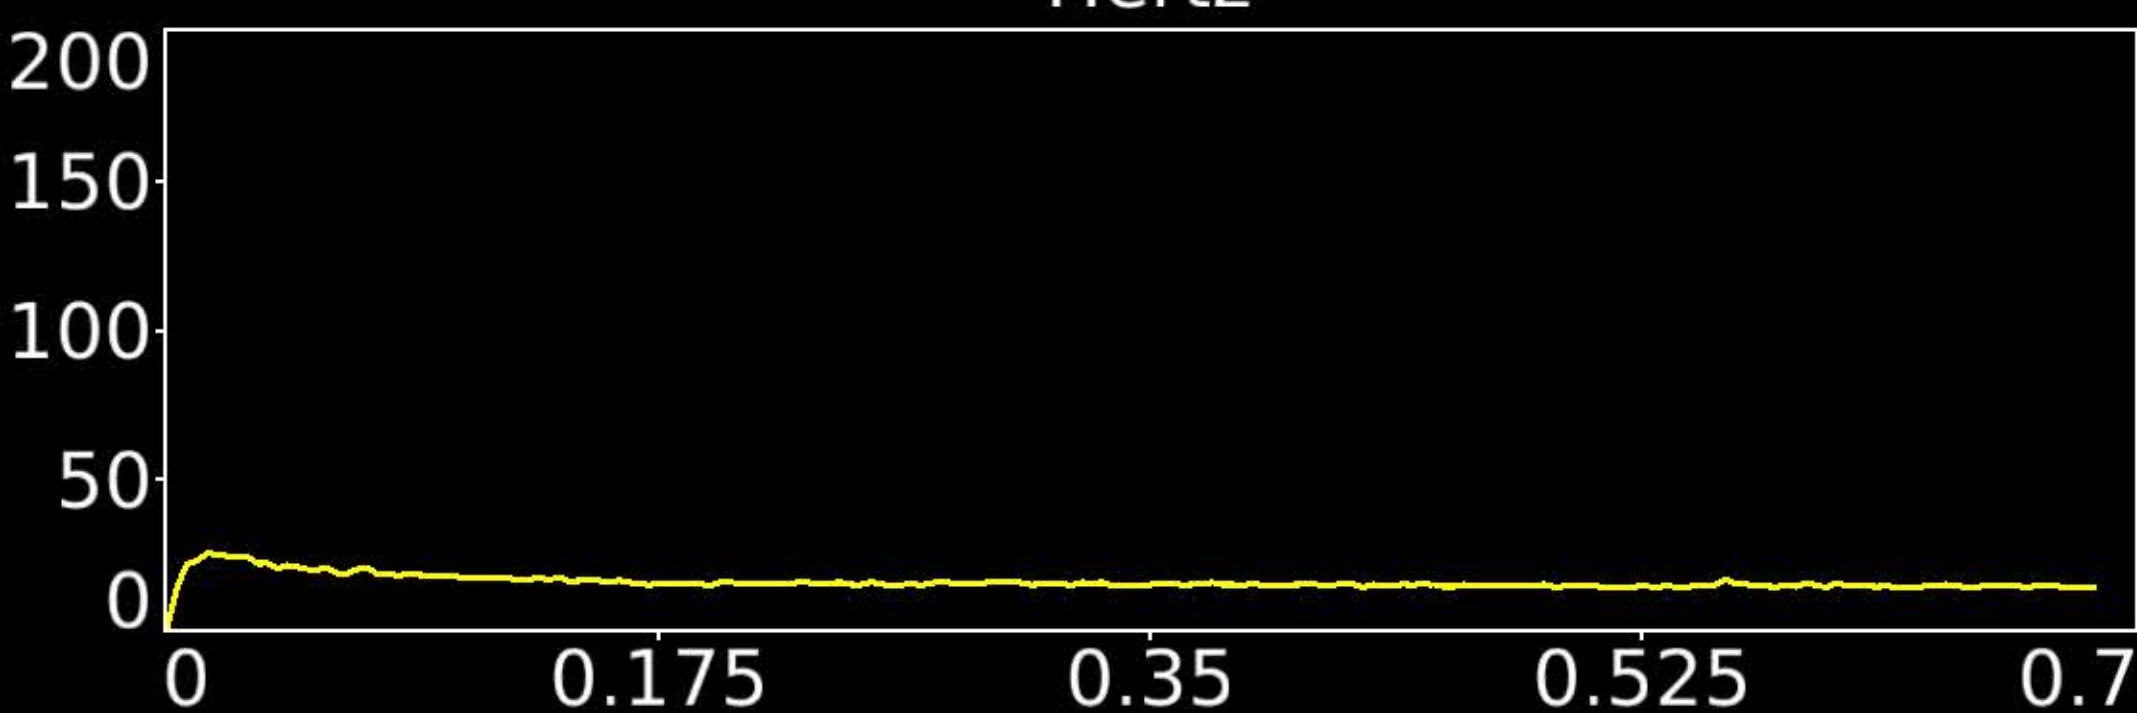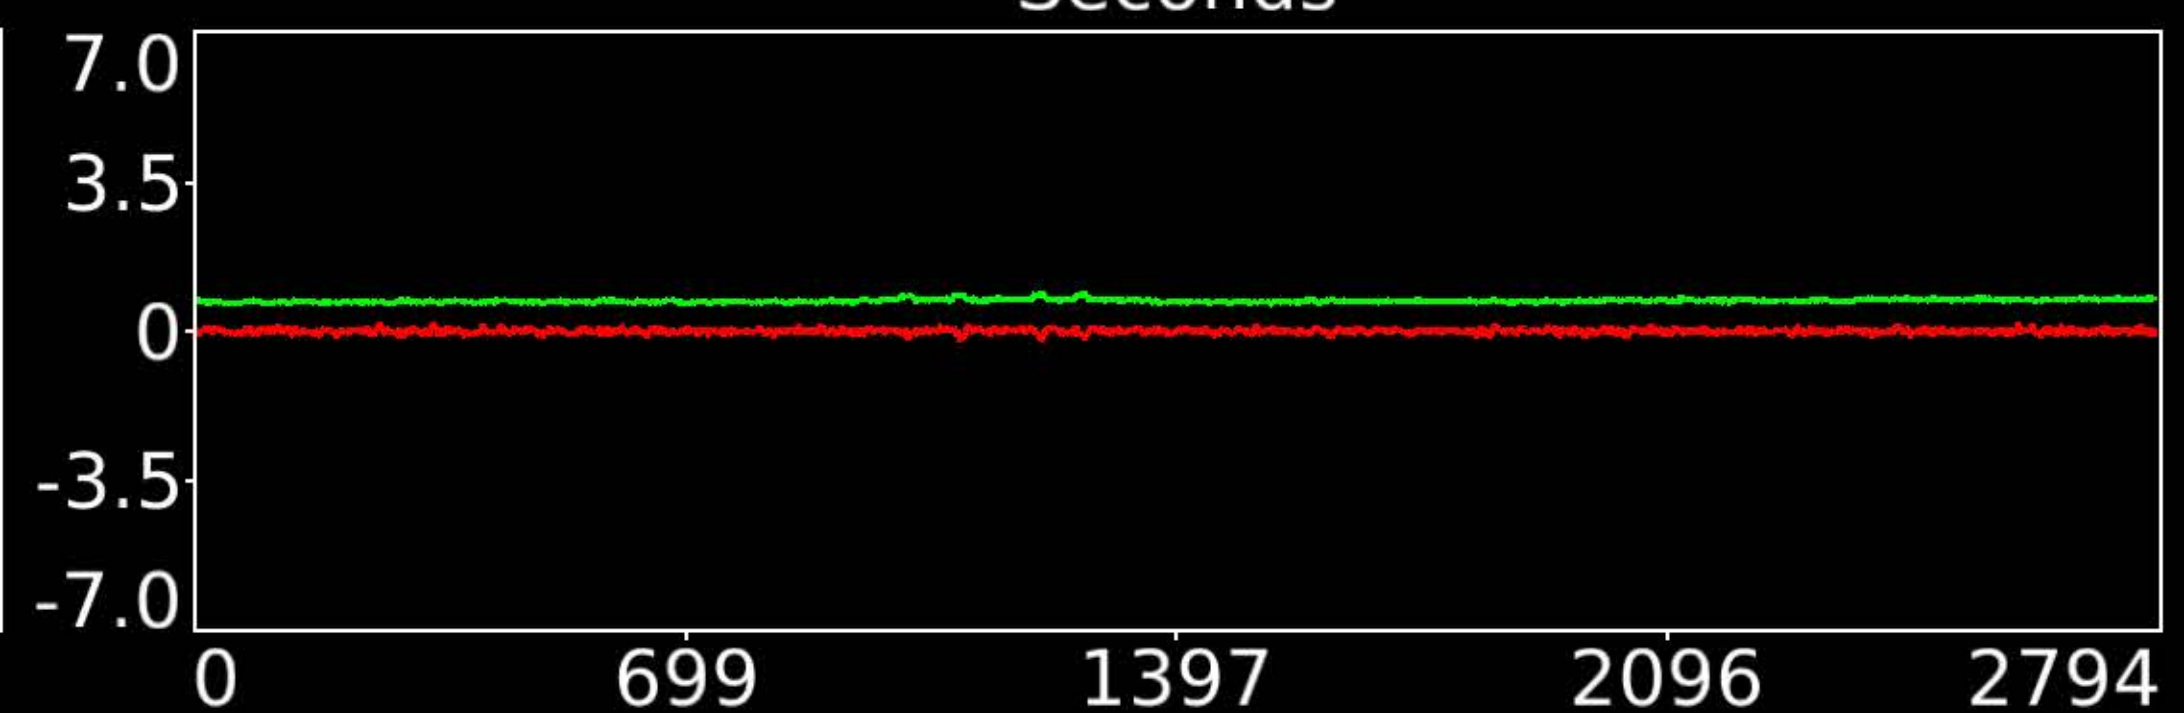

|                          |                            |                              |  |
|--------------------------|----------------------------|------------------------------|--|
| Number & Class: 43 Noise |                            | Name: Medulla Recon Artifact |  |
| RVT Correlated: No       | DVARS Dip Associated: Yes  | Cross-Subject Variable: Yes  |  |
| Single Subject: No       | % Variance Explained: 0.89 | Globality Index: 1.64        |  |
| Rest Component: 46       | Taskr Component: 38        | Task Modulated: No           |  |

Rationale: Spatial map not reflective of known areas or RSNs without connectivity other brain structures; some banding in sagittal plane suggestive of multi-band recon



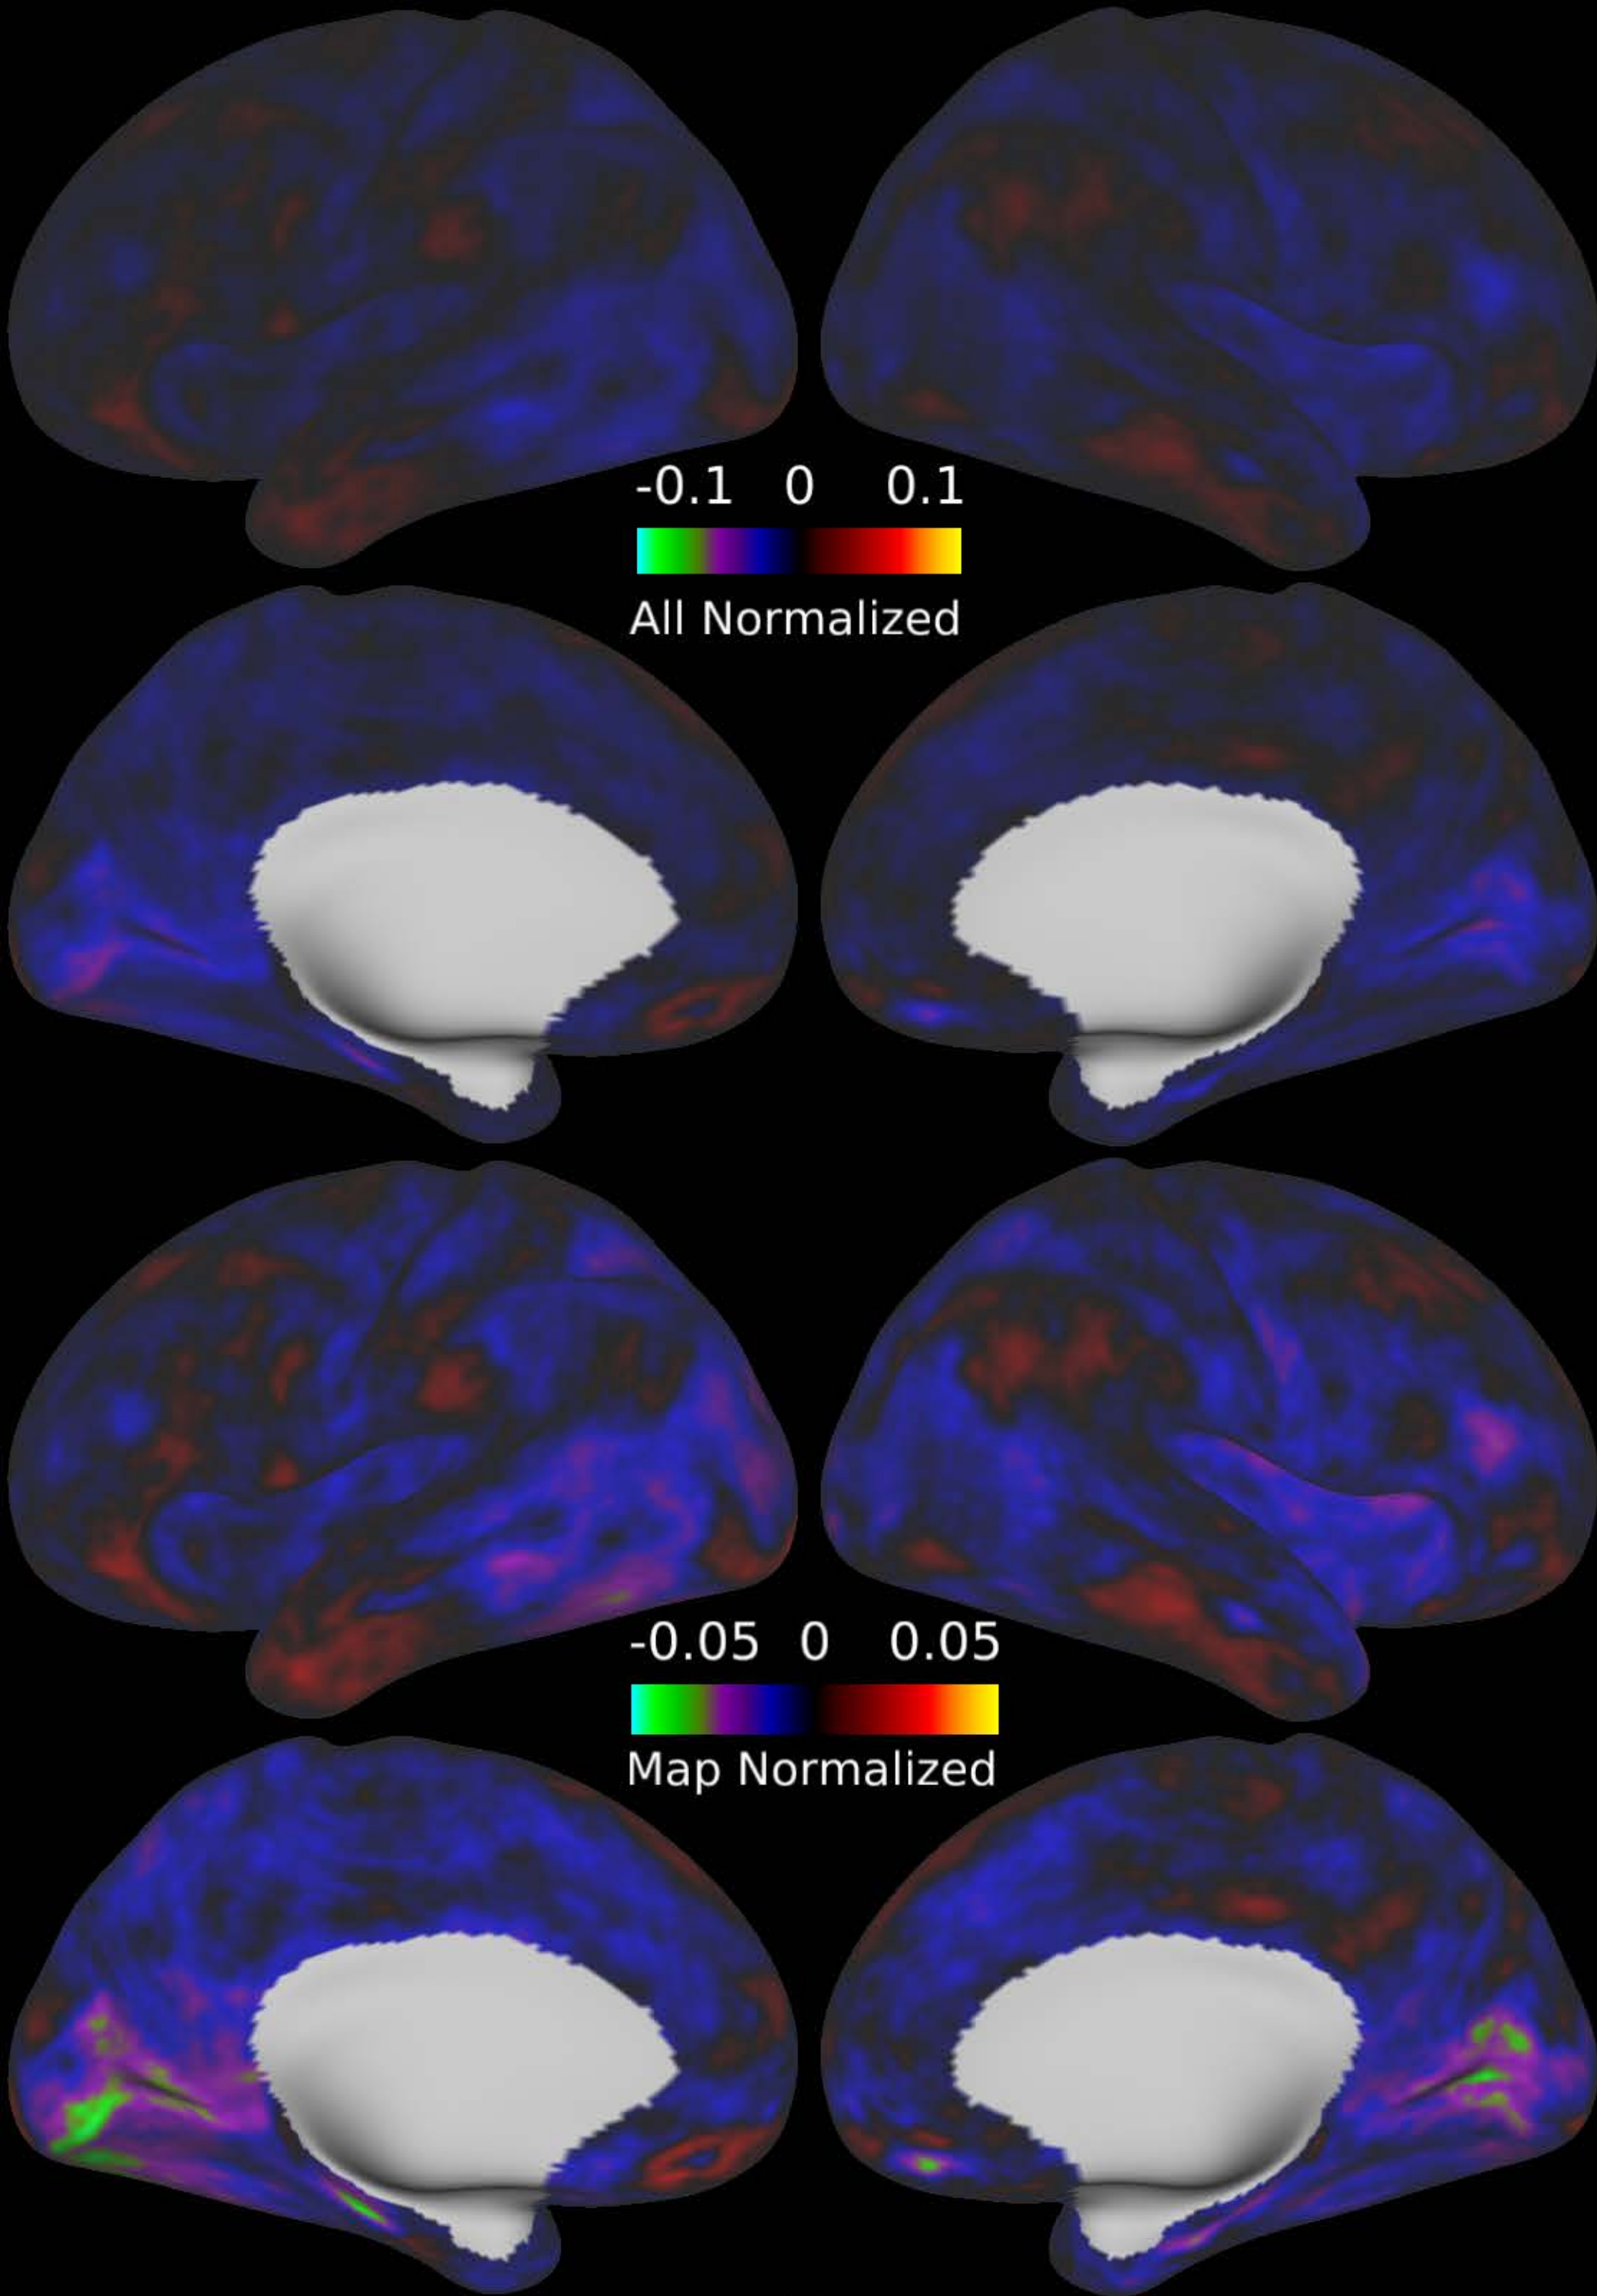

Hertz

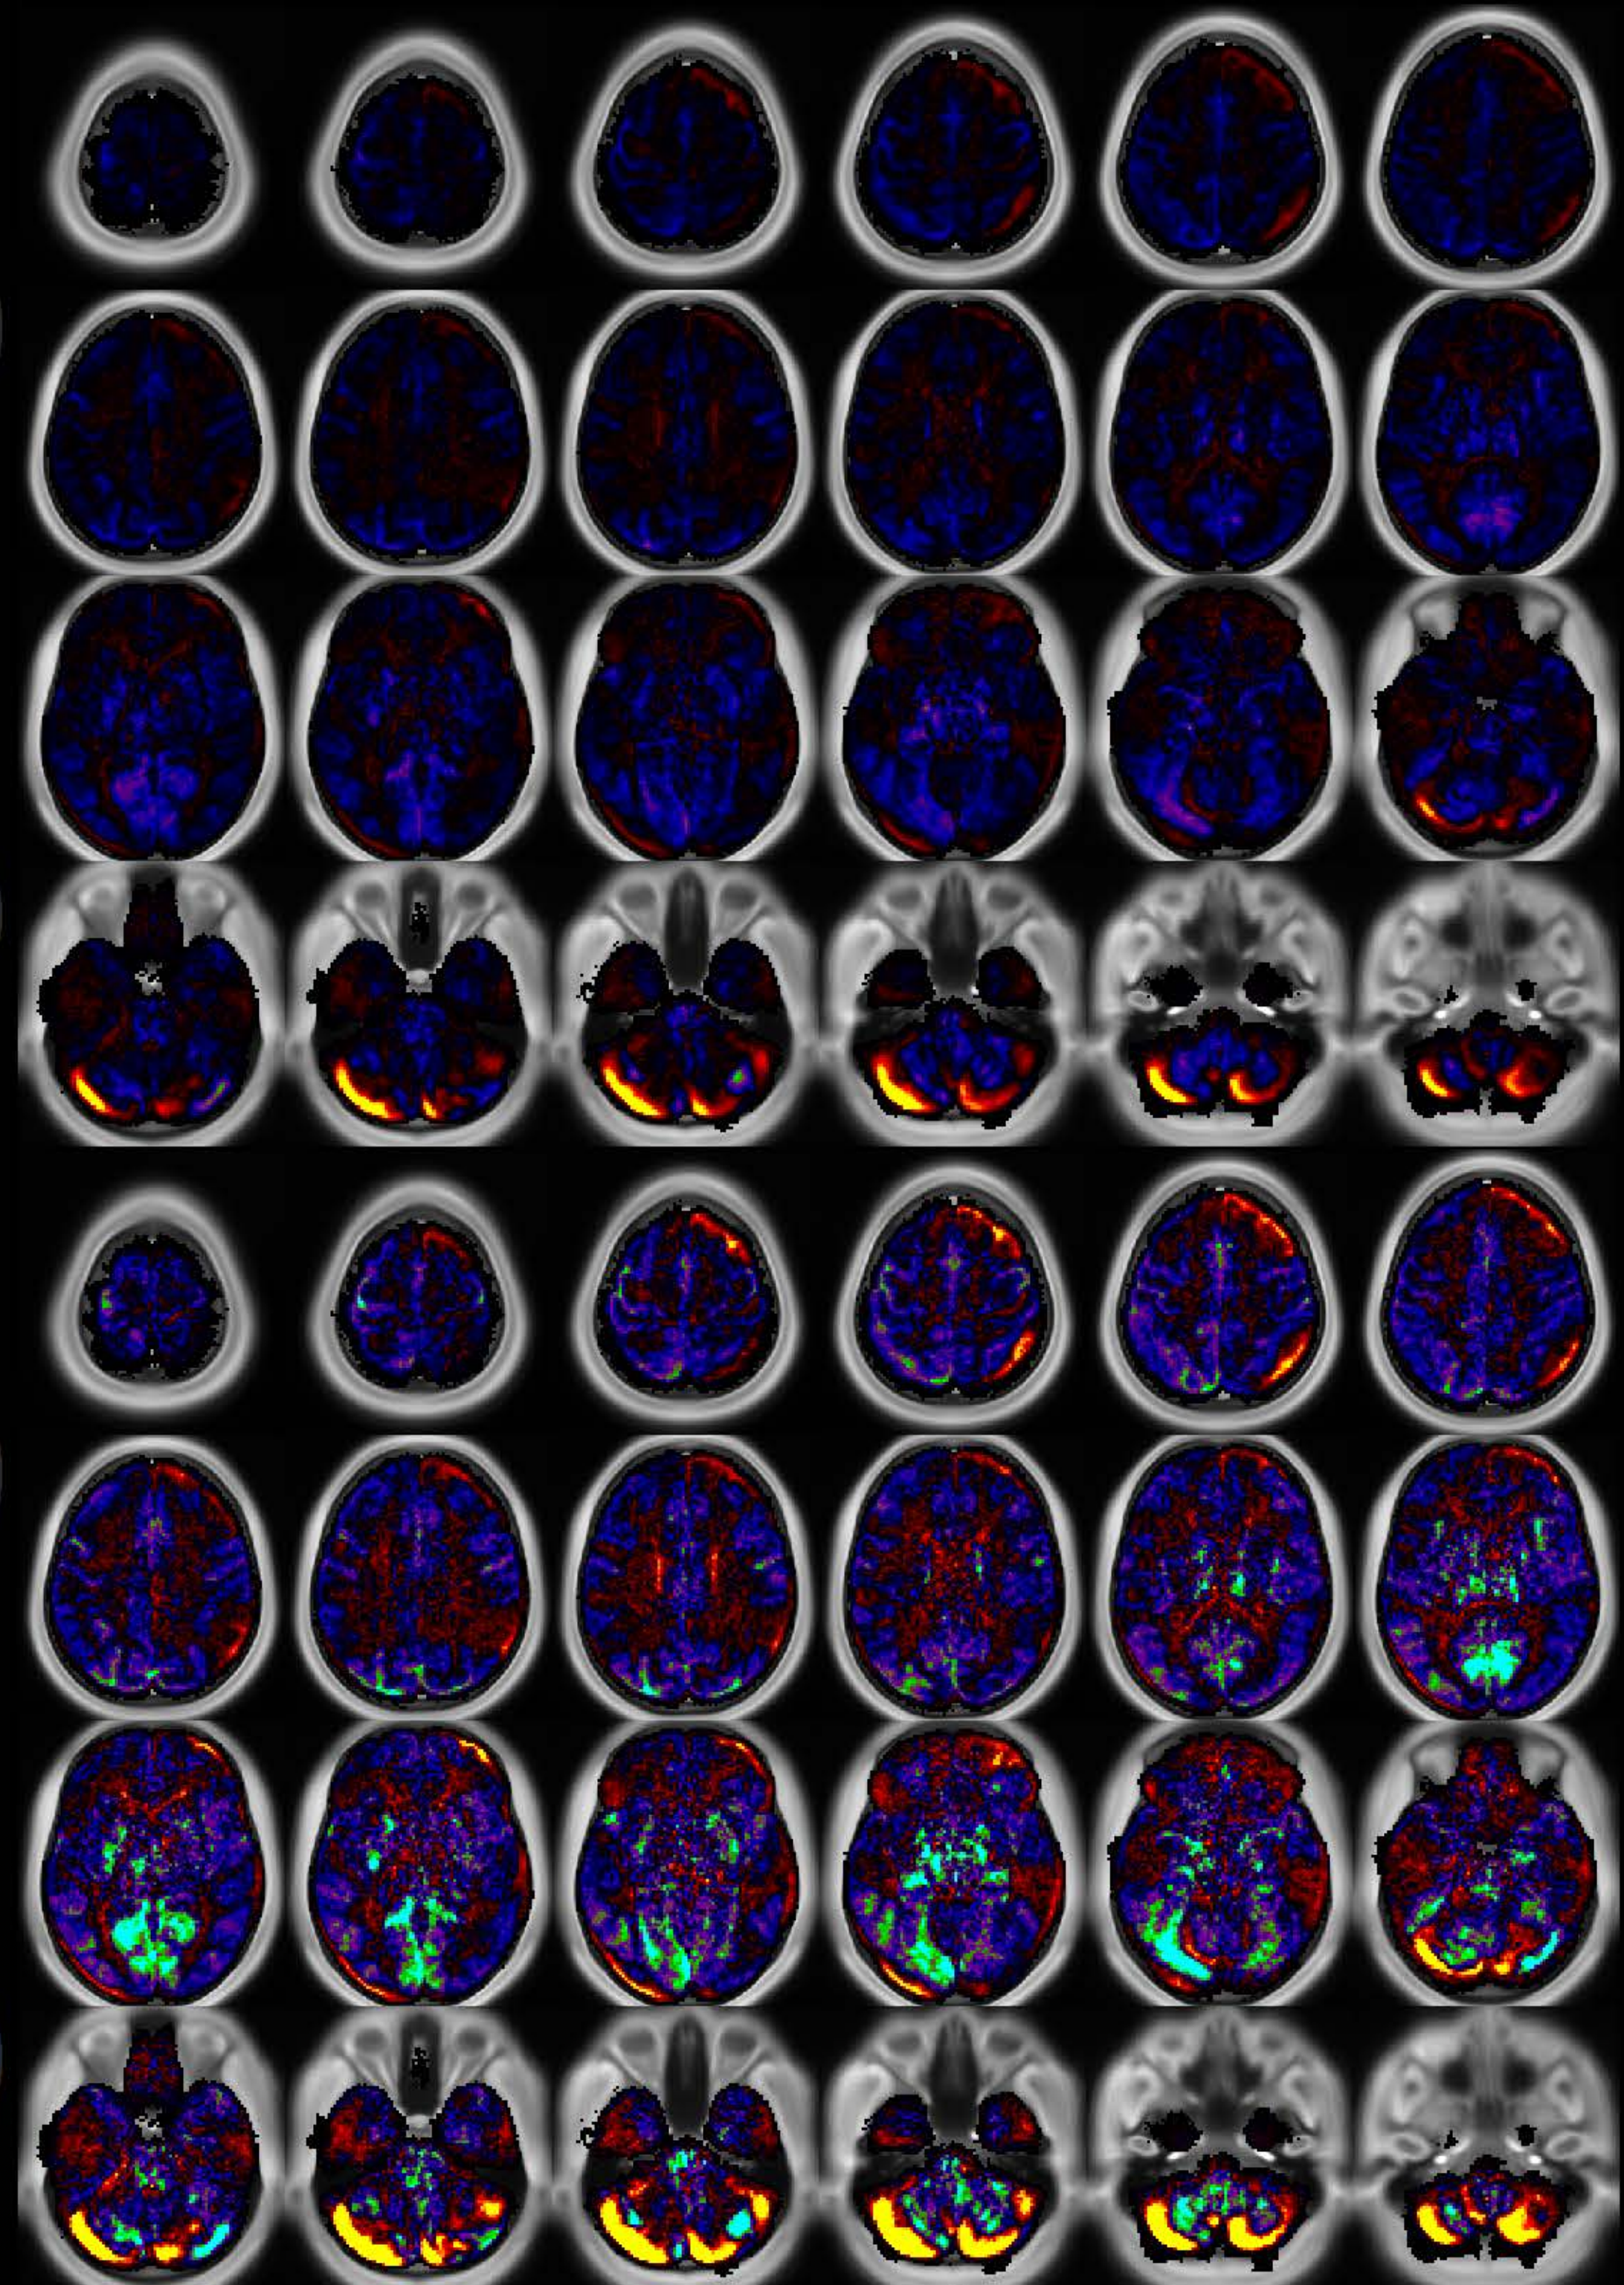

Seconds

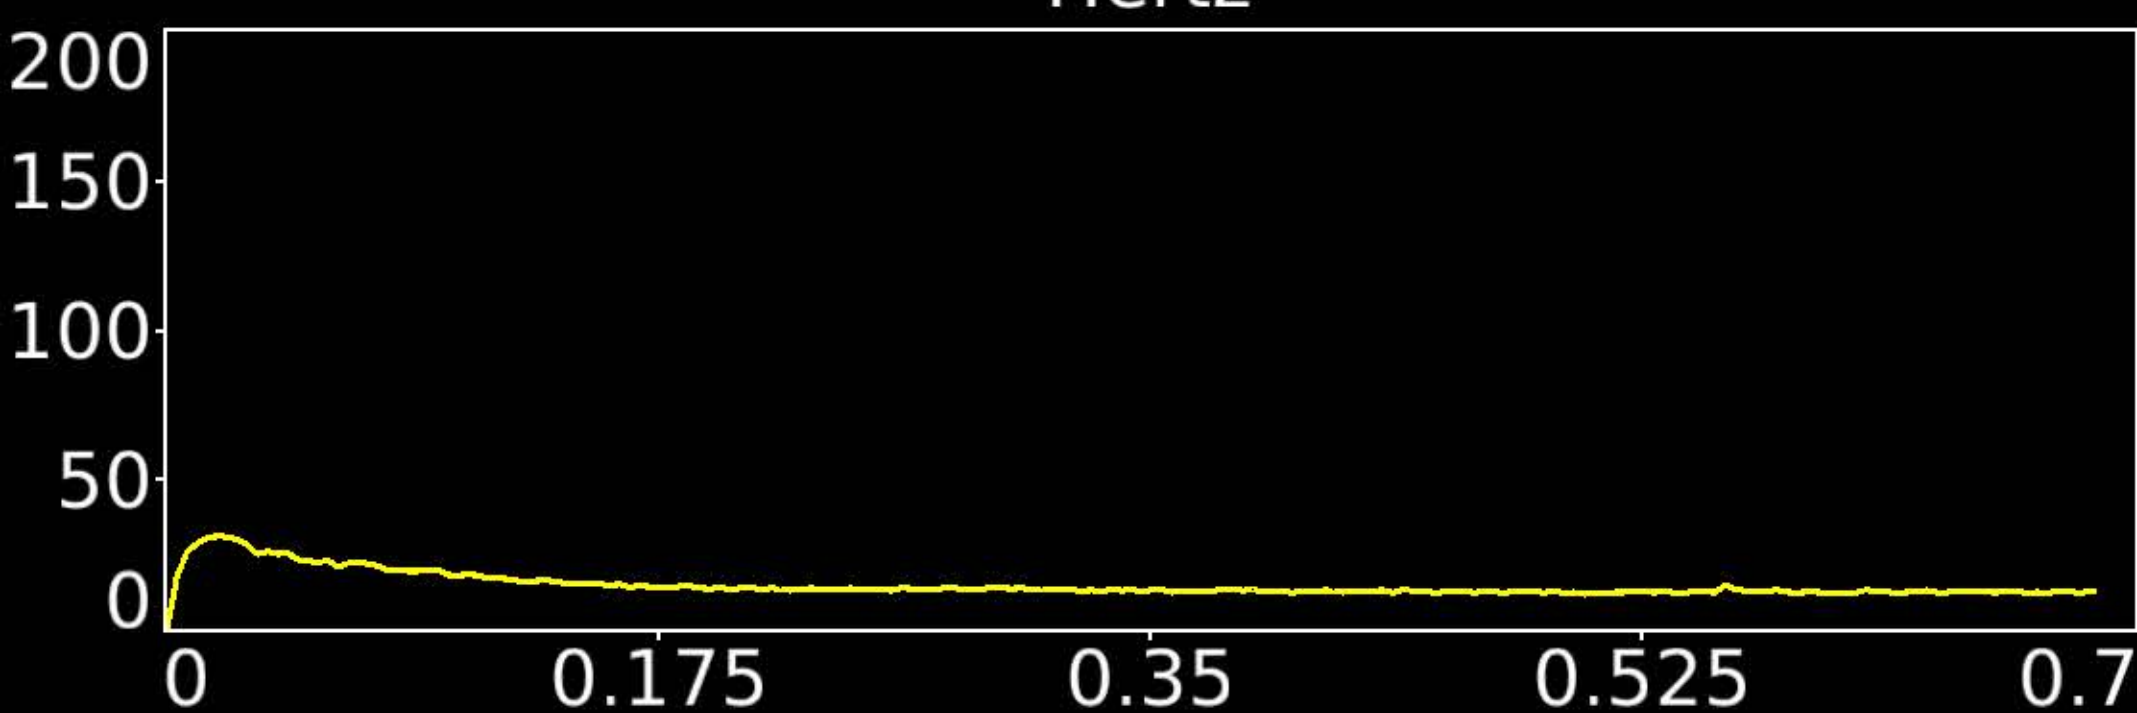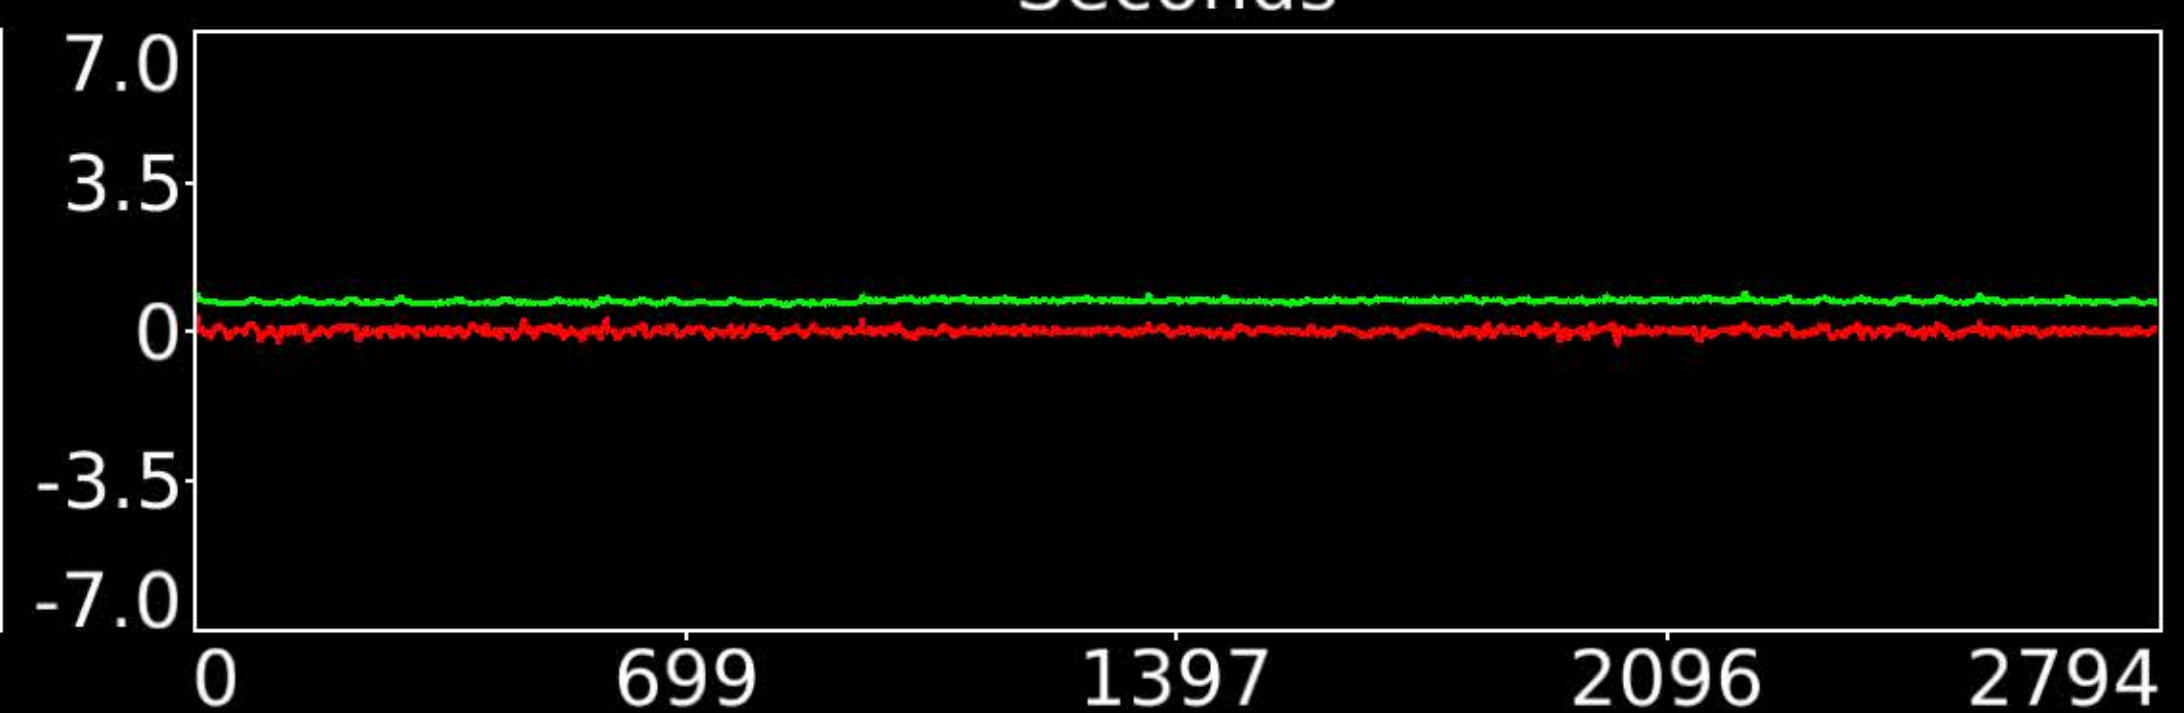

Number & Class: 44 Noise

Name: Cerebellar Movement Artifact Left

RVT Correlated: No

DVARS Dip Associated: Yes

Cross-Subject Variable: Yes

Single Subject: Yes

% Variance Explained: 0.86

Globality Index: 1.64

Rest Component: 57

Taskr Component: 34

Task Modulated: No

Rationale: Cerebellar edge motion component with high correlation to DVARS dipoles; looks like movement regressor beta map (derivative of X translation)



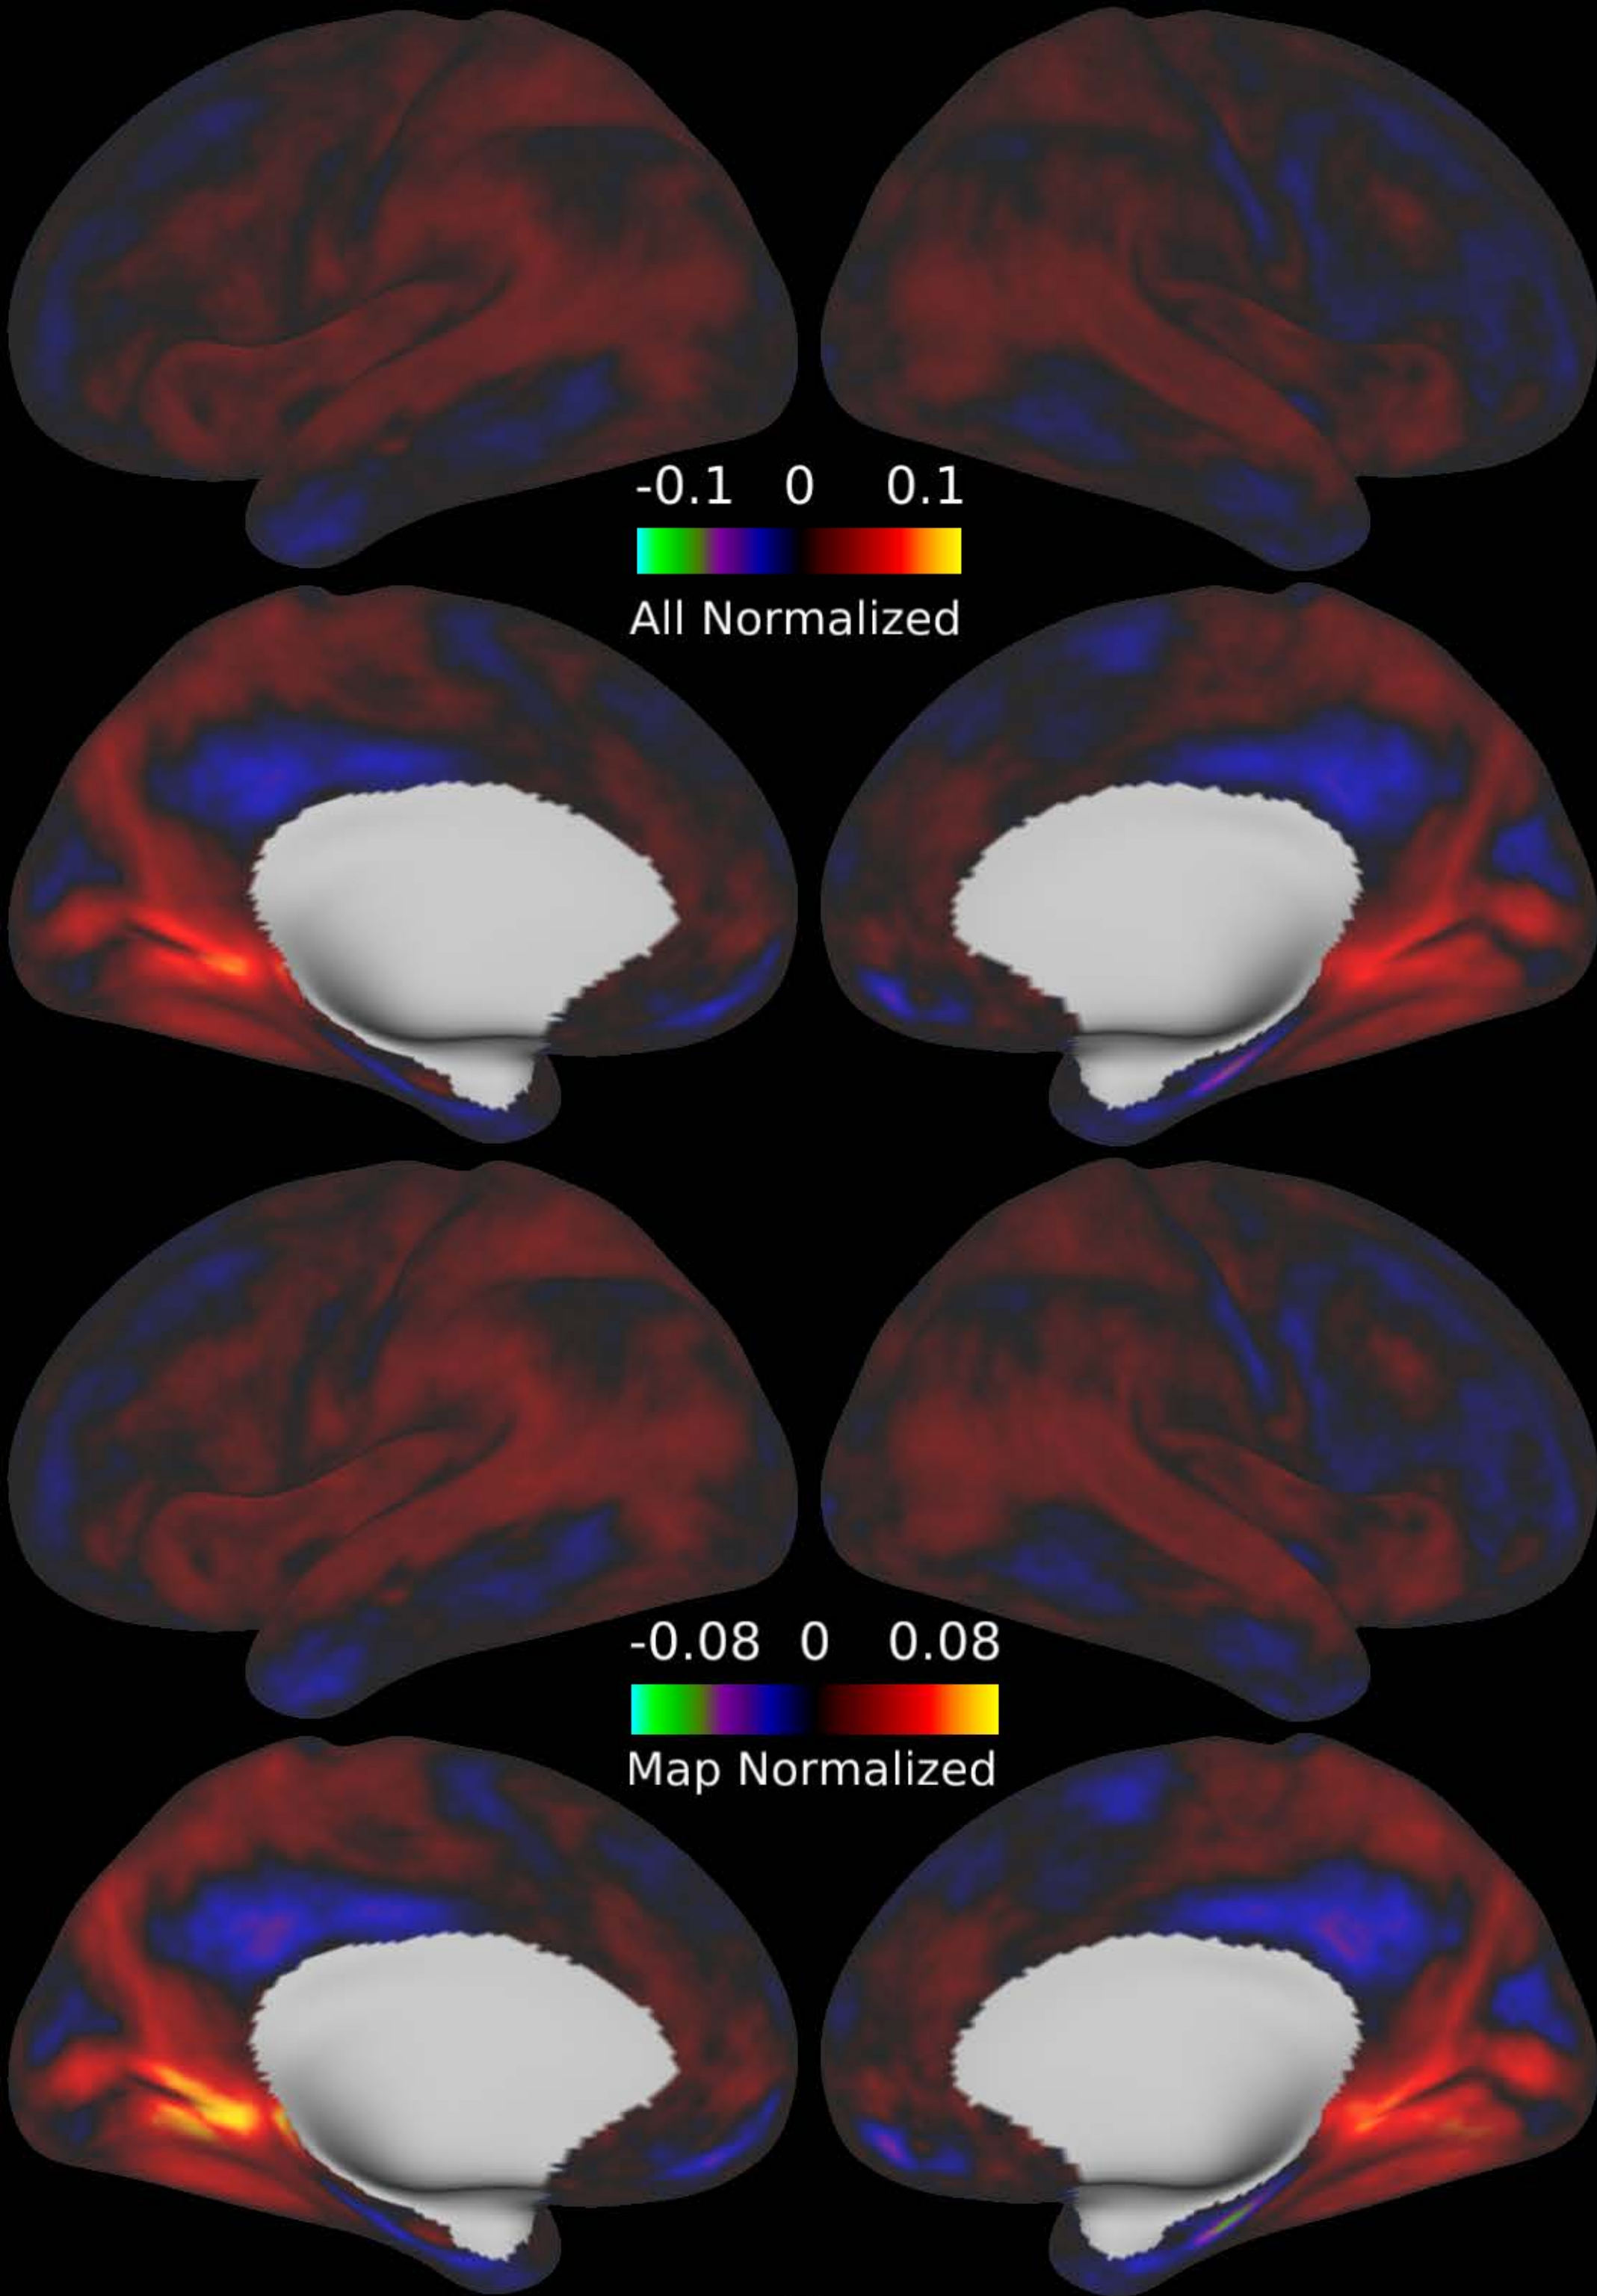

Hertz

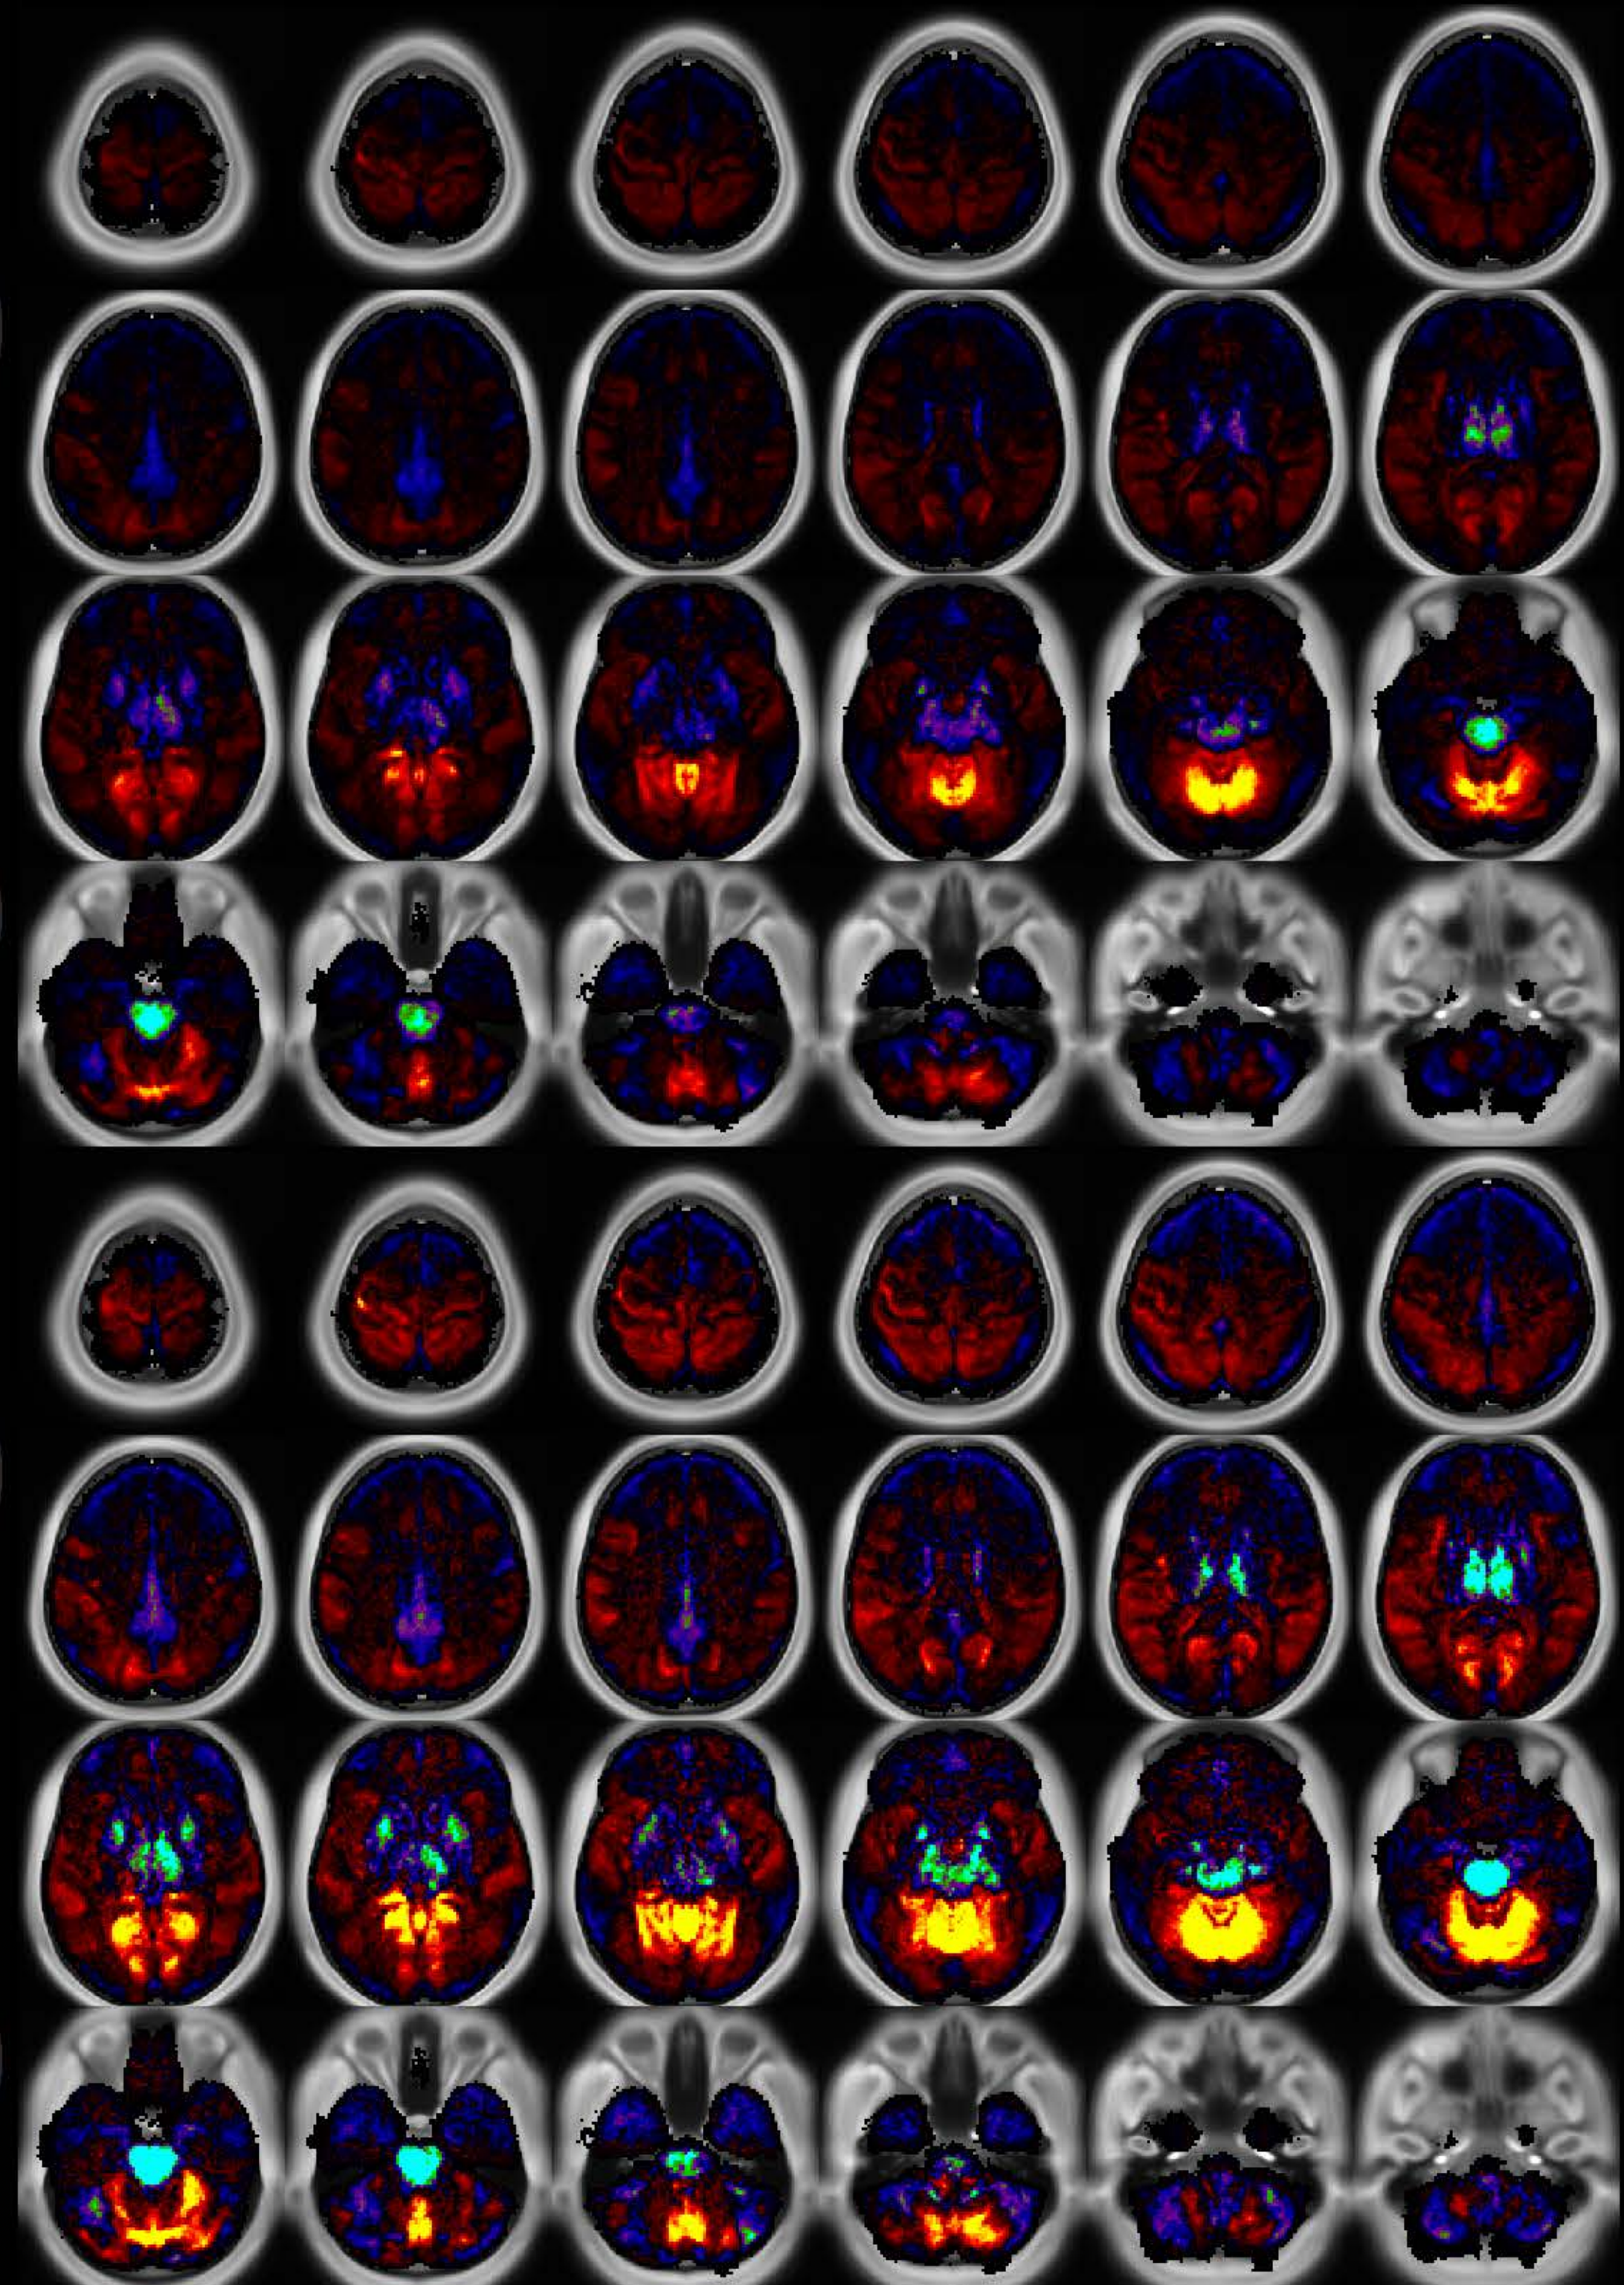

Seconds

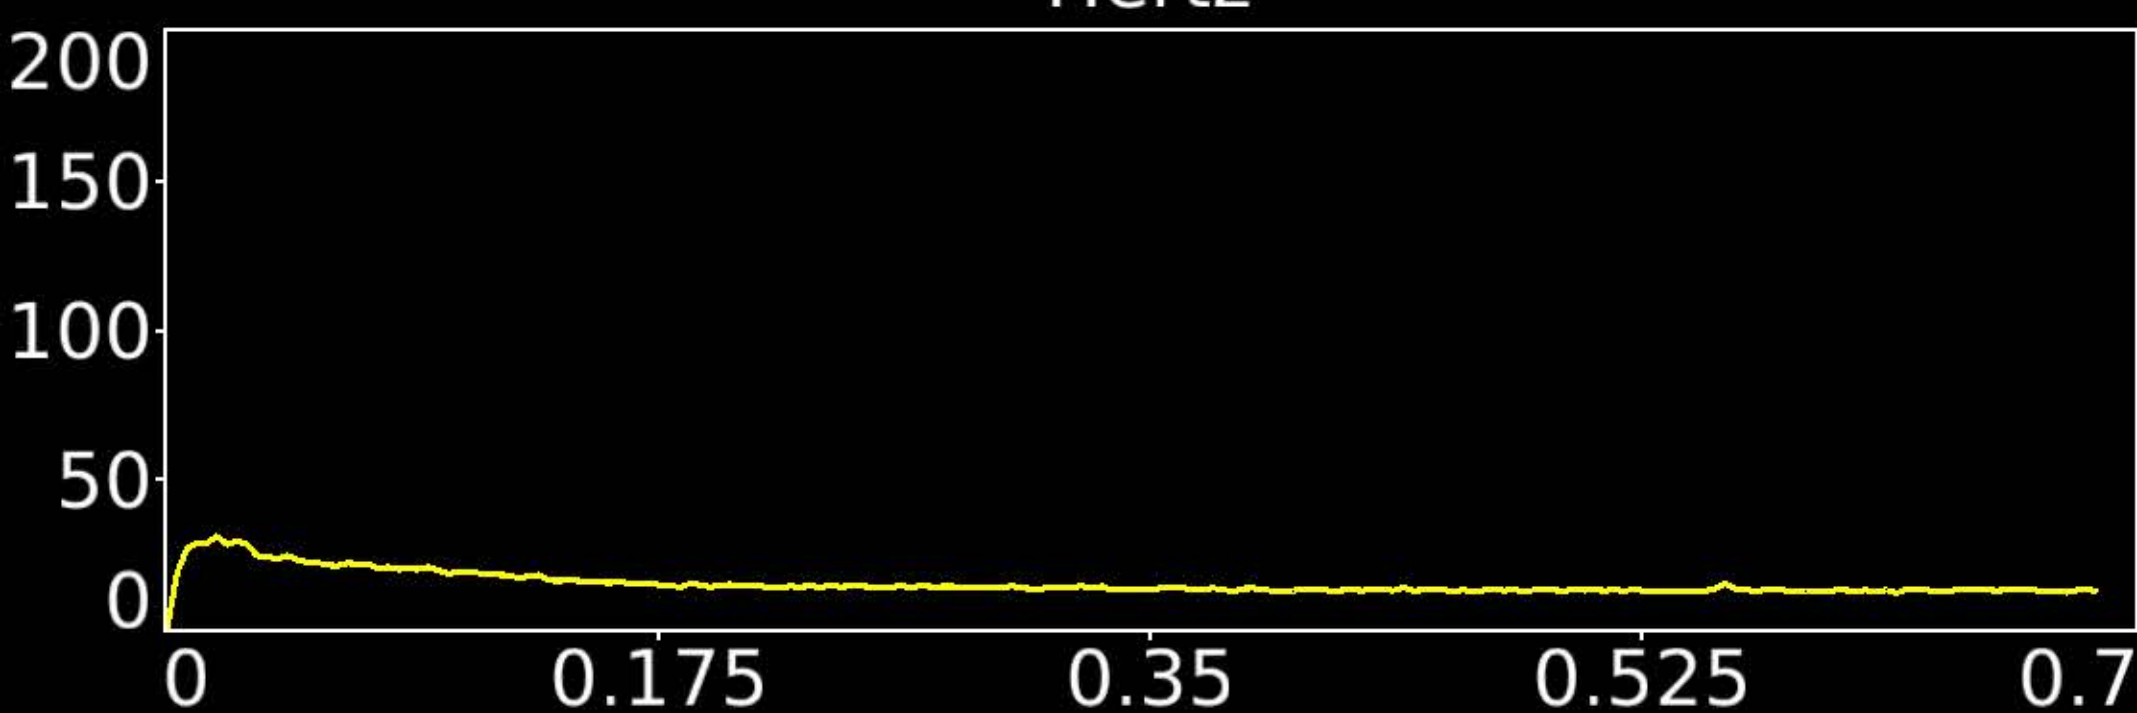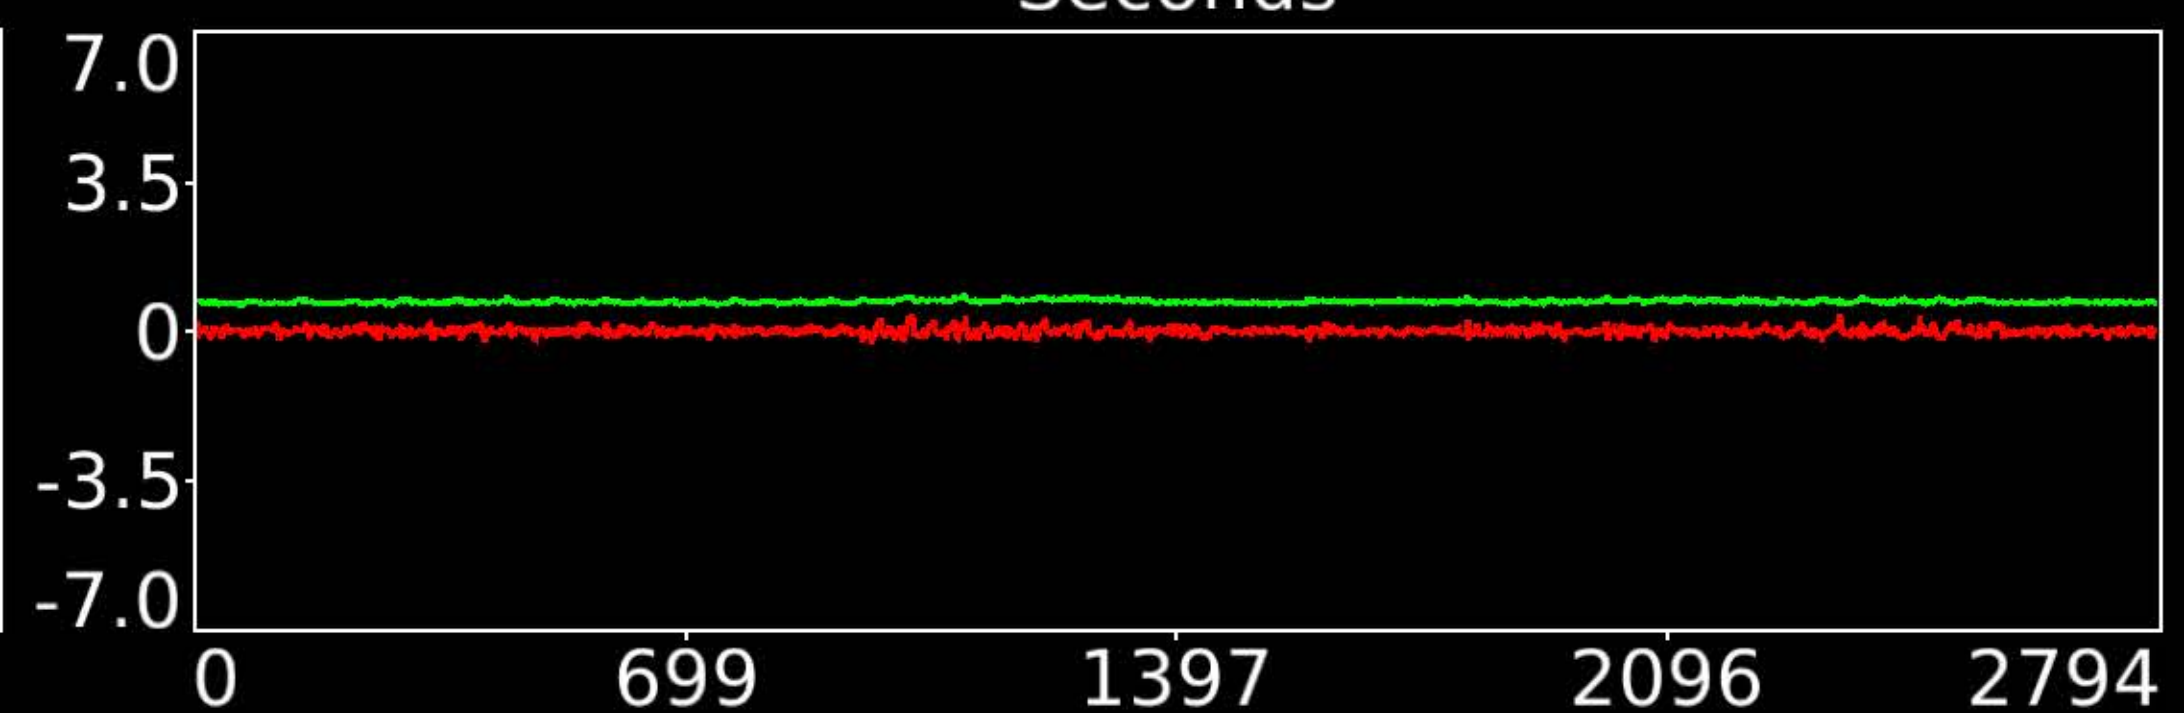

|                                                                                       |                           |                                                         |  |
|---------------------------------------------------------------------------------------|---------------------------|---------------------------------------------------------|--|
| Number & Class: 45 Noise                                                              |                           | Name: Superior Cerebellum > Pons + Thalamus DVARS Assoc |  |
| RVT Correlated: No                                                                    | DVARS Dip Associated: Yes | Cross-Subject Variable: No                              |  |
| Single Subject: No                                                                    | % Variance Explained: 0.8 | Globality Index: 0.79                                   |  |
| Rest Component: No                                                                    | Taskr Component: 41       | Task Modulated: No                                      |  |
| Rationale: Spatial map not reflective of known areas or RSNs<br>DVARS dips associated |                           |                                                         |  |



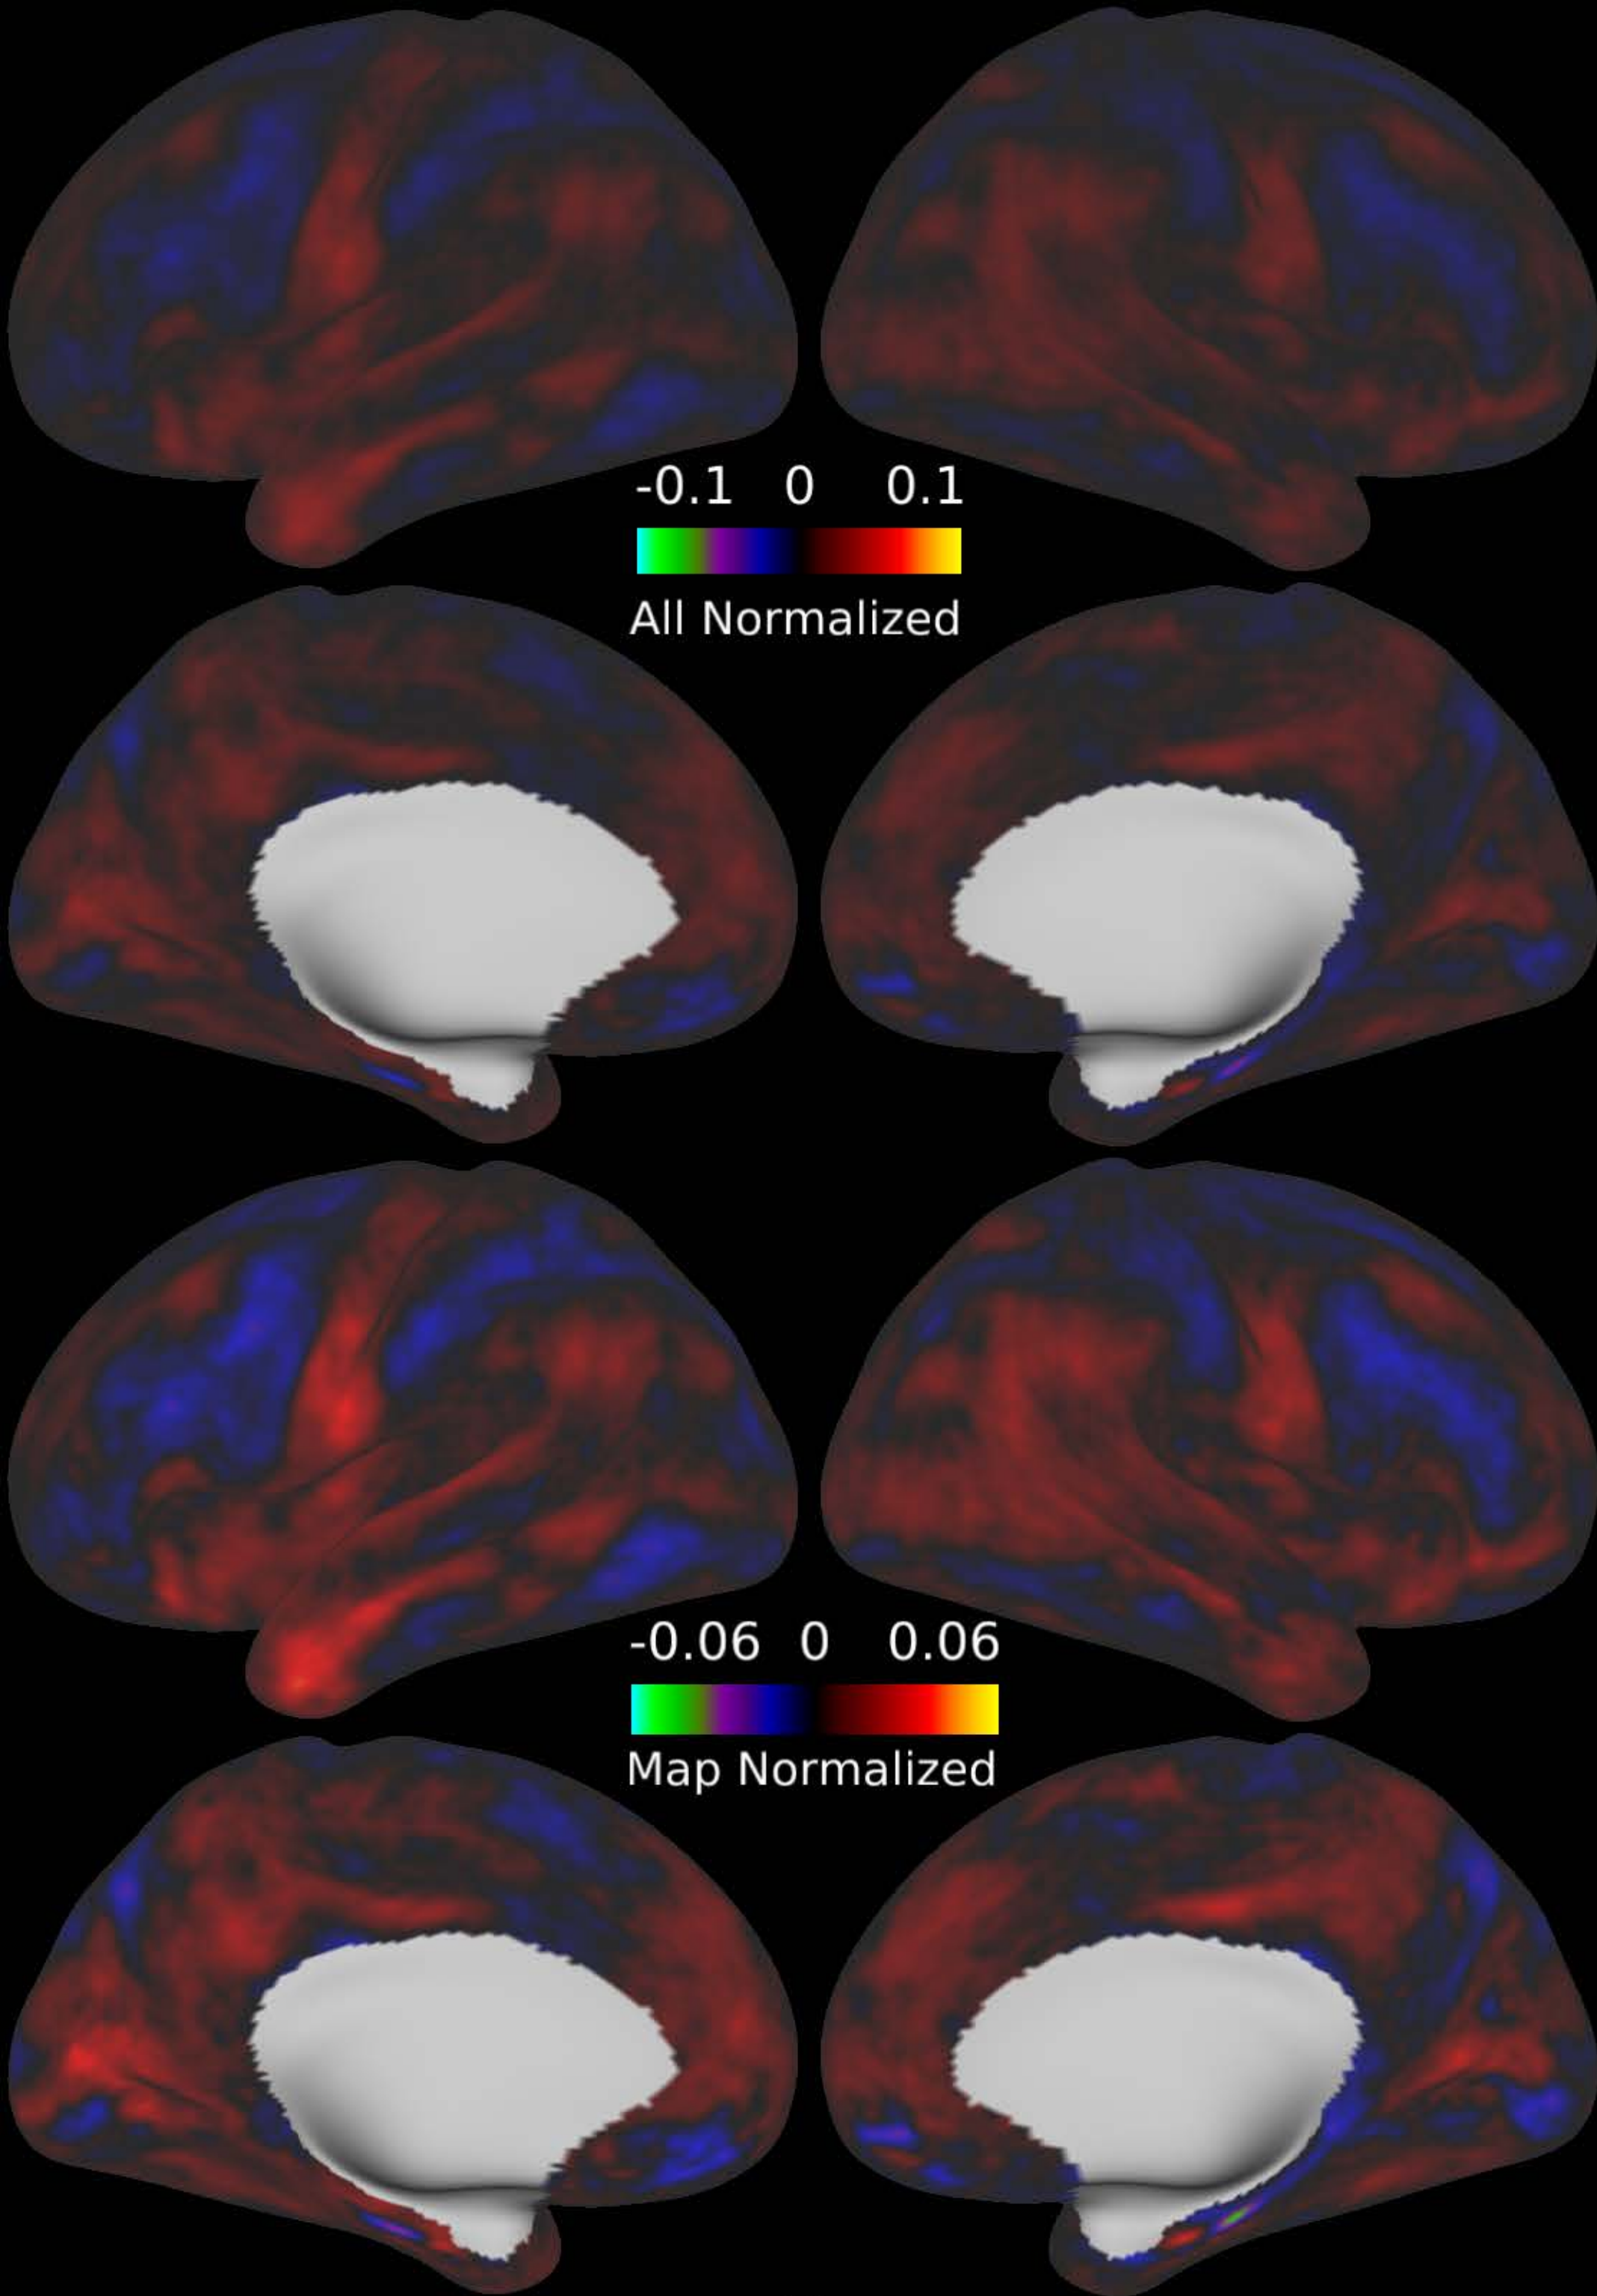

Hertz

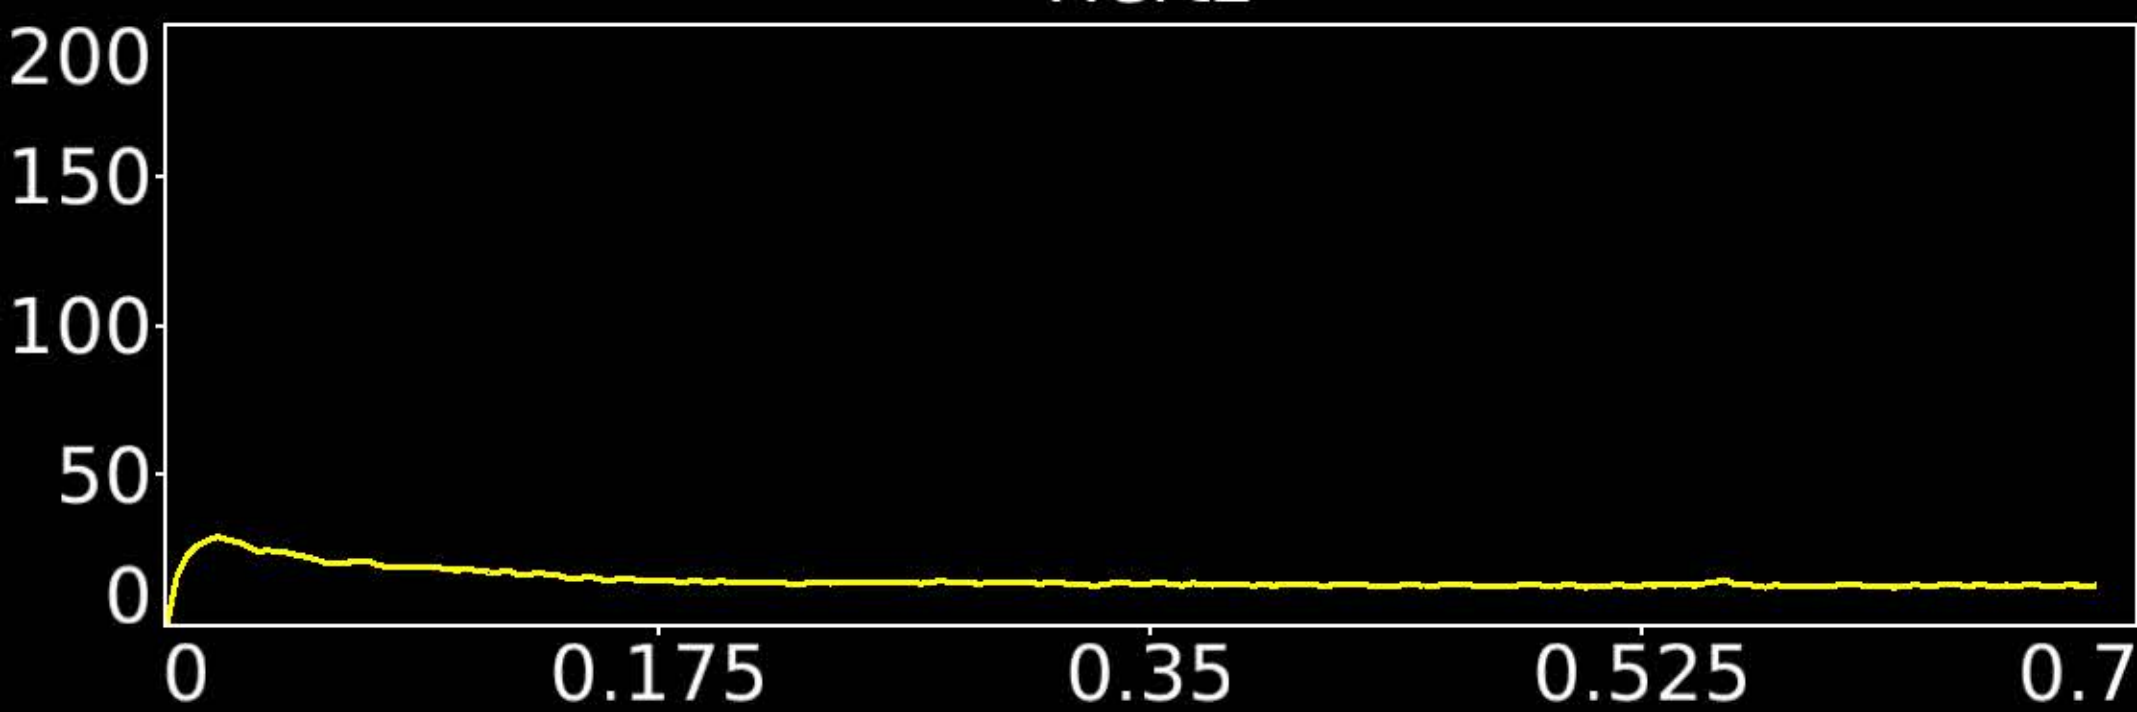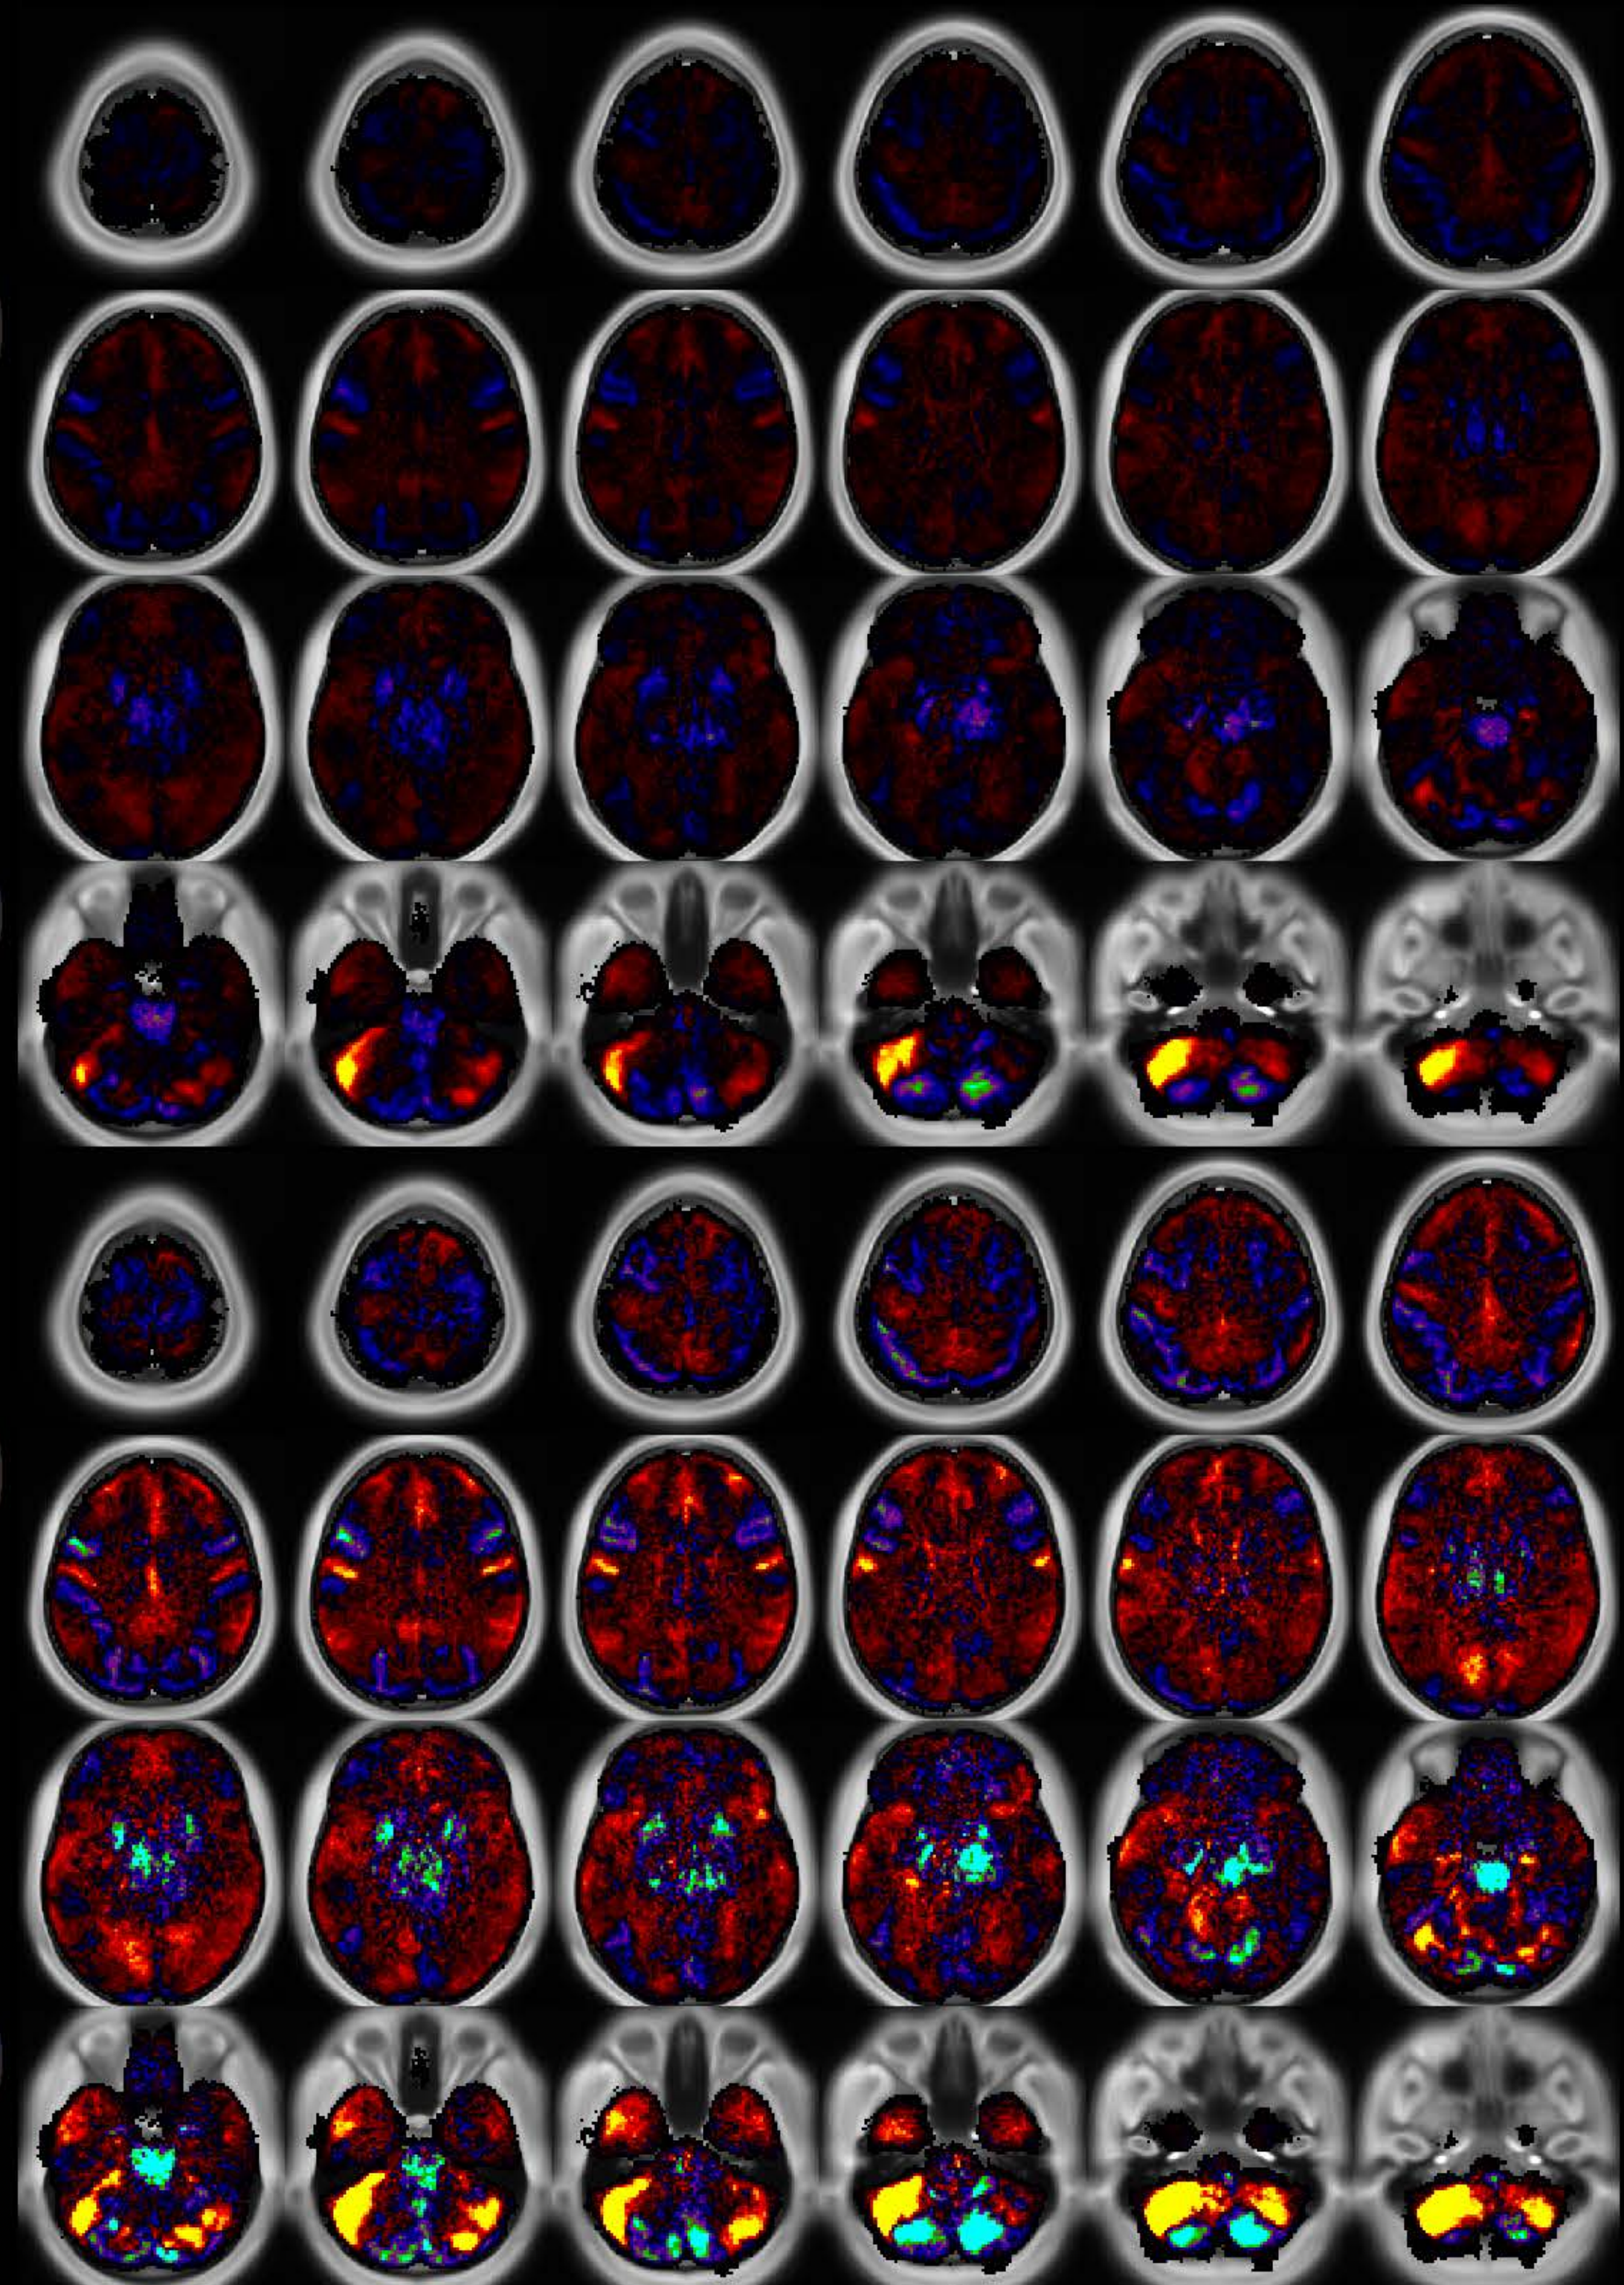

Seconds

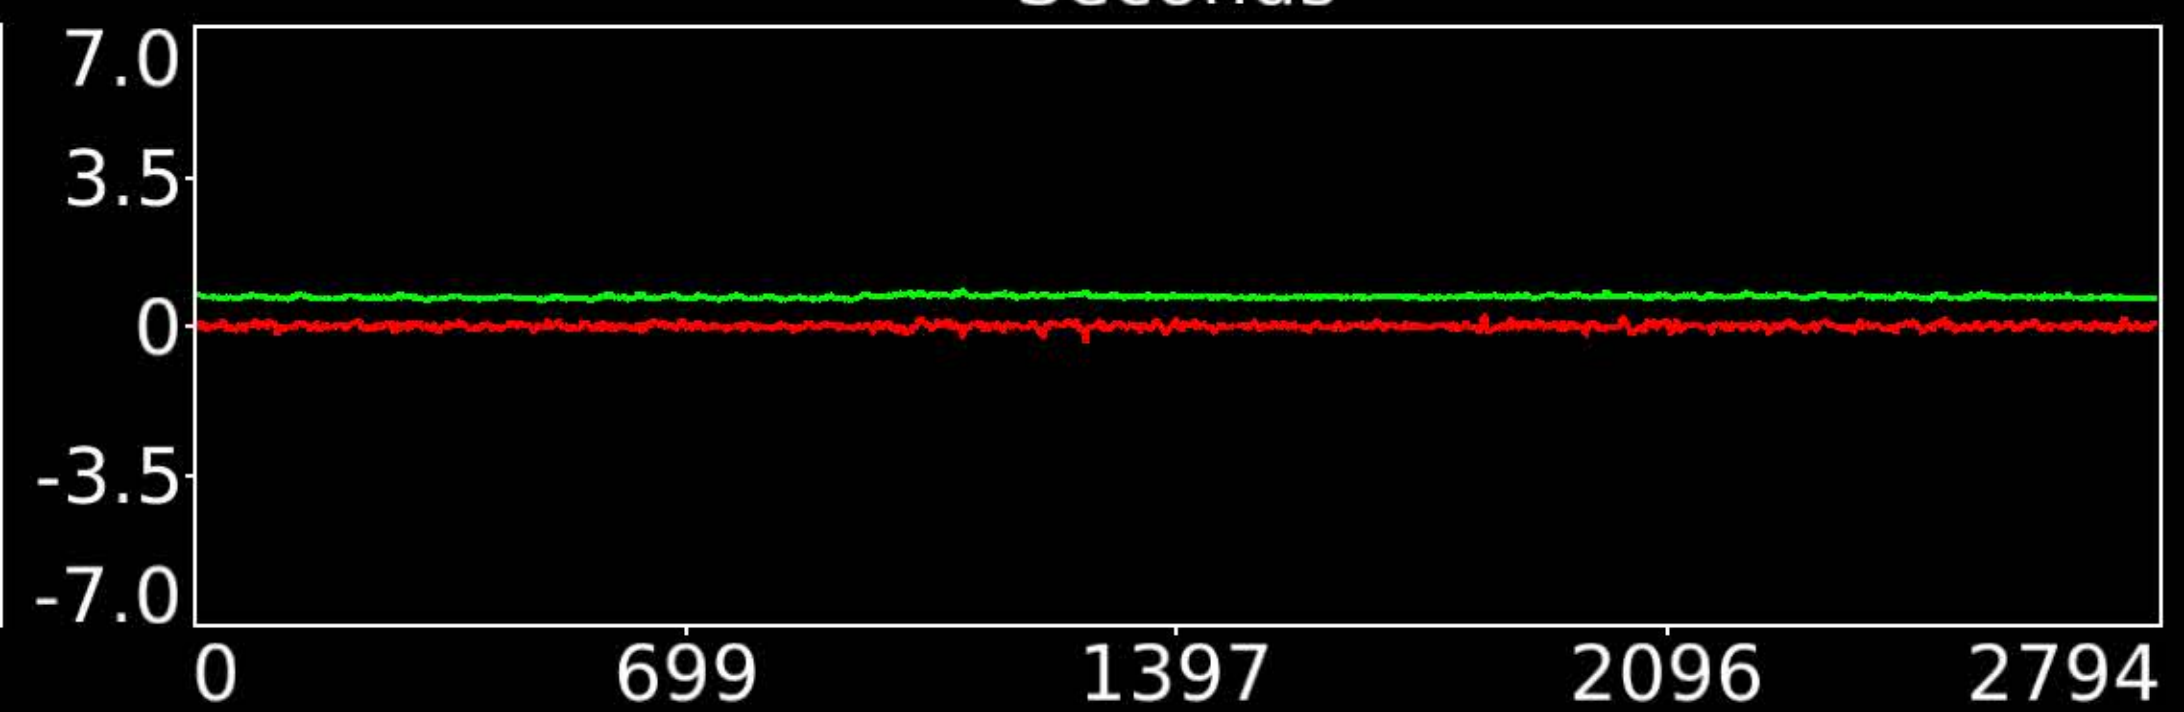

|                                                                                                        |                            |                                                   |  |
|--------------------------------------------------------------------------------------------------------|----------------------------|---------------------------------------------------|--|
| Number & Class: 46 Noise                                                                               |                            | Name: L Cerebellum Near Sigmoid Sinus DVARS Assoc |  |
| RVT Correlated: No                                                                                     | DVARS Dip Associated: Yes  | Cross-Subject Variable: No                        |  |
| Single Subject: Yes                                                                                    | % Variance Explained: 0.79 | Globality Index: 0.44                             |  |
| Rest Component: No                                                                                     | Taskr Component: 42        | Task Modulated: No                                |  |
| Rationale: Cerebellar edge motion component with high correlation to DVARS dips; likely motion related |                            |                                                   |  |



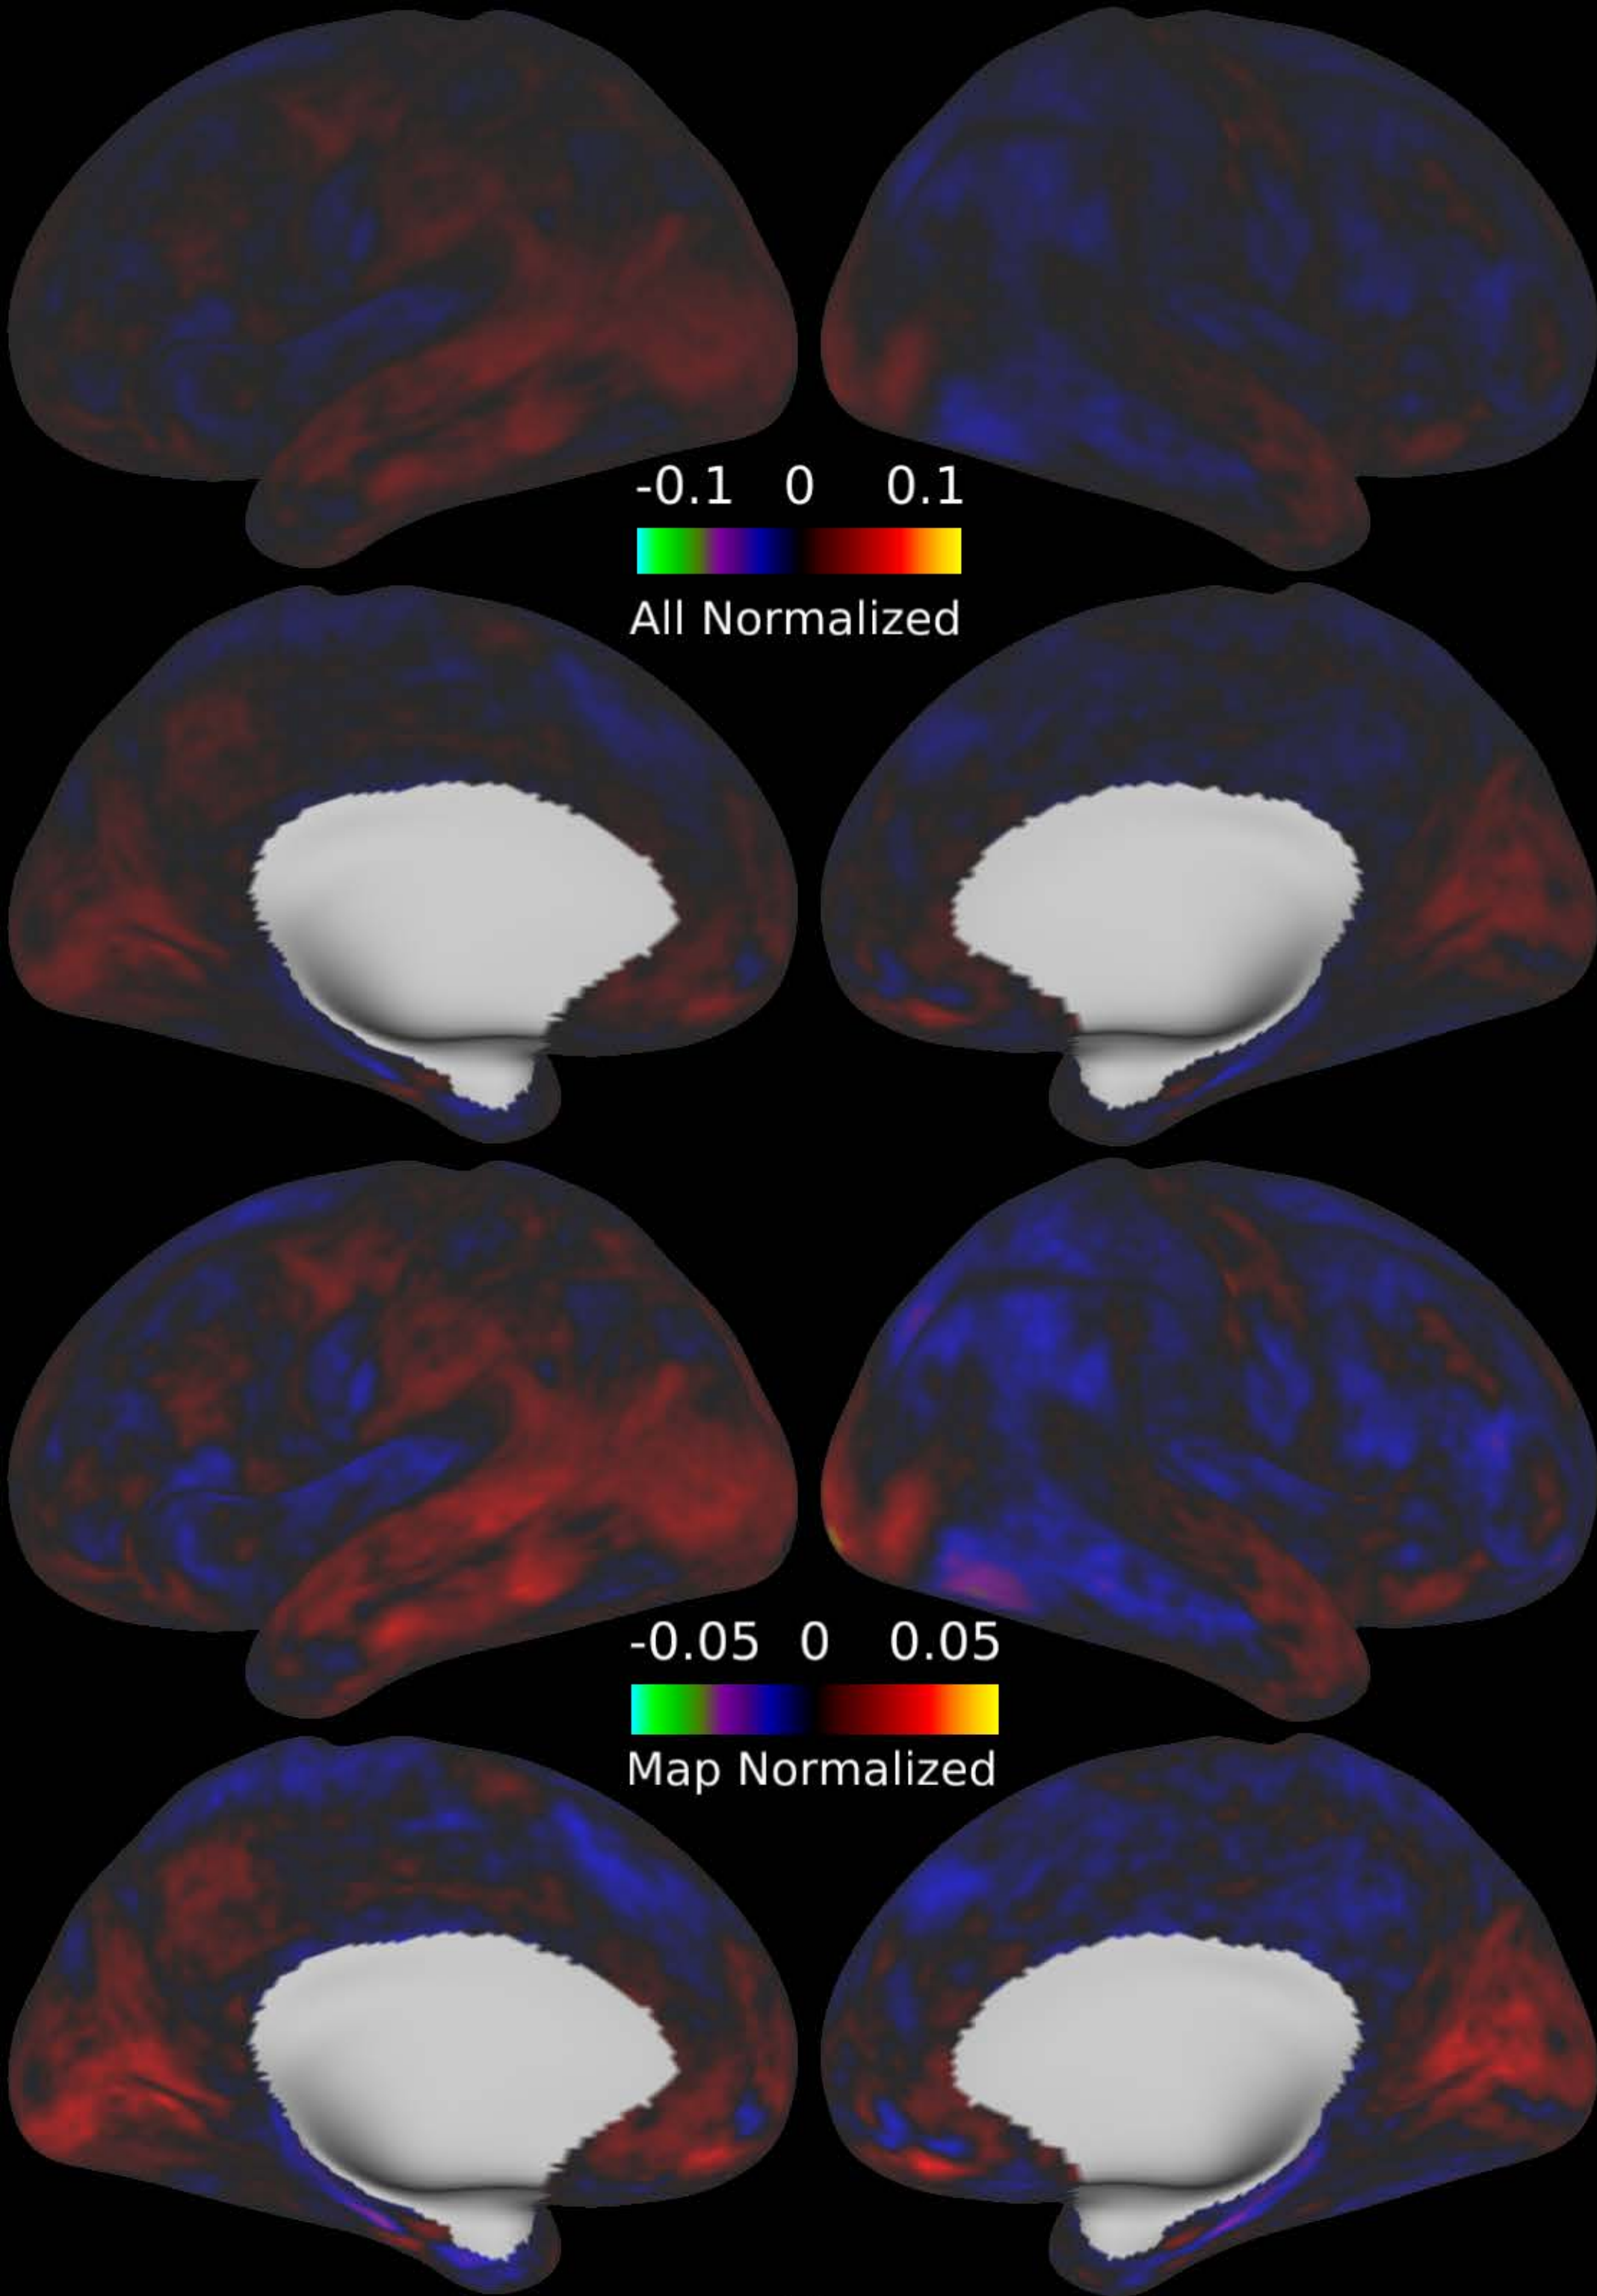

Hertz

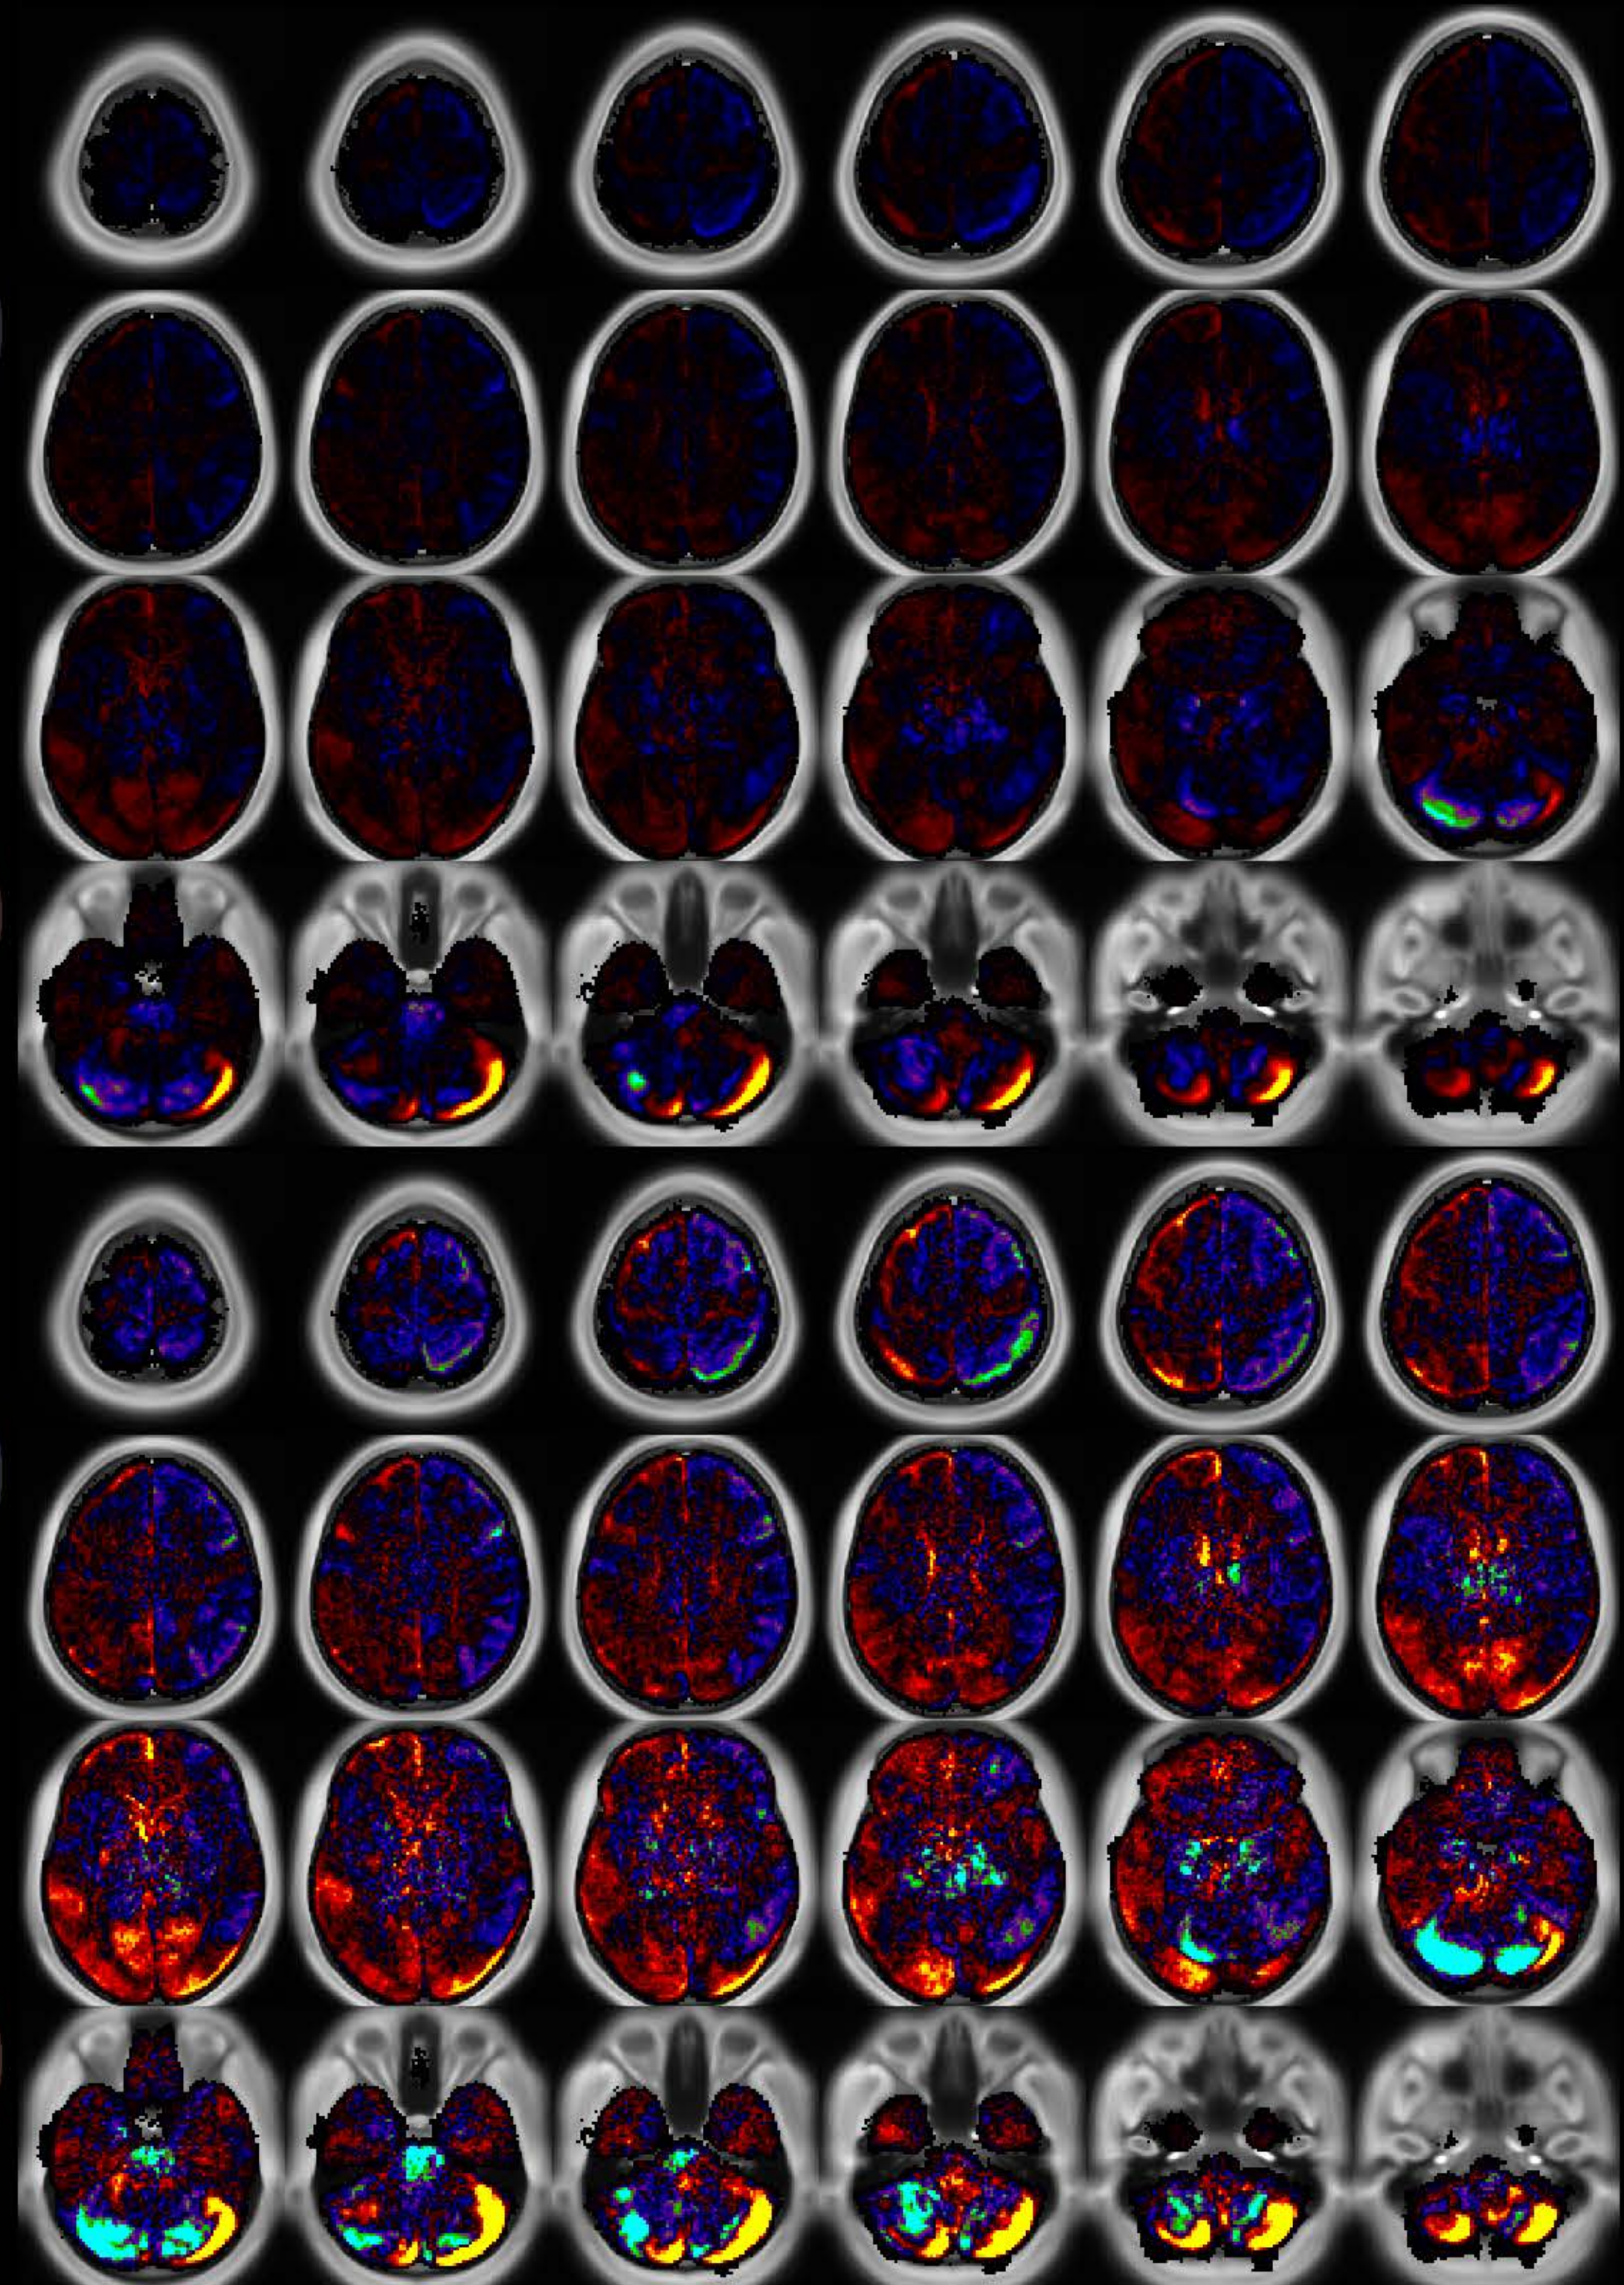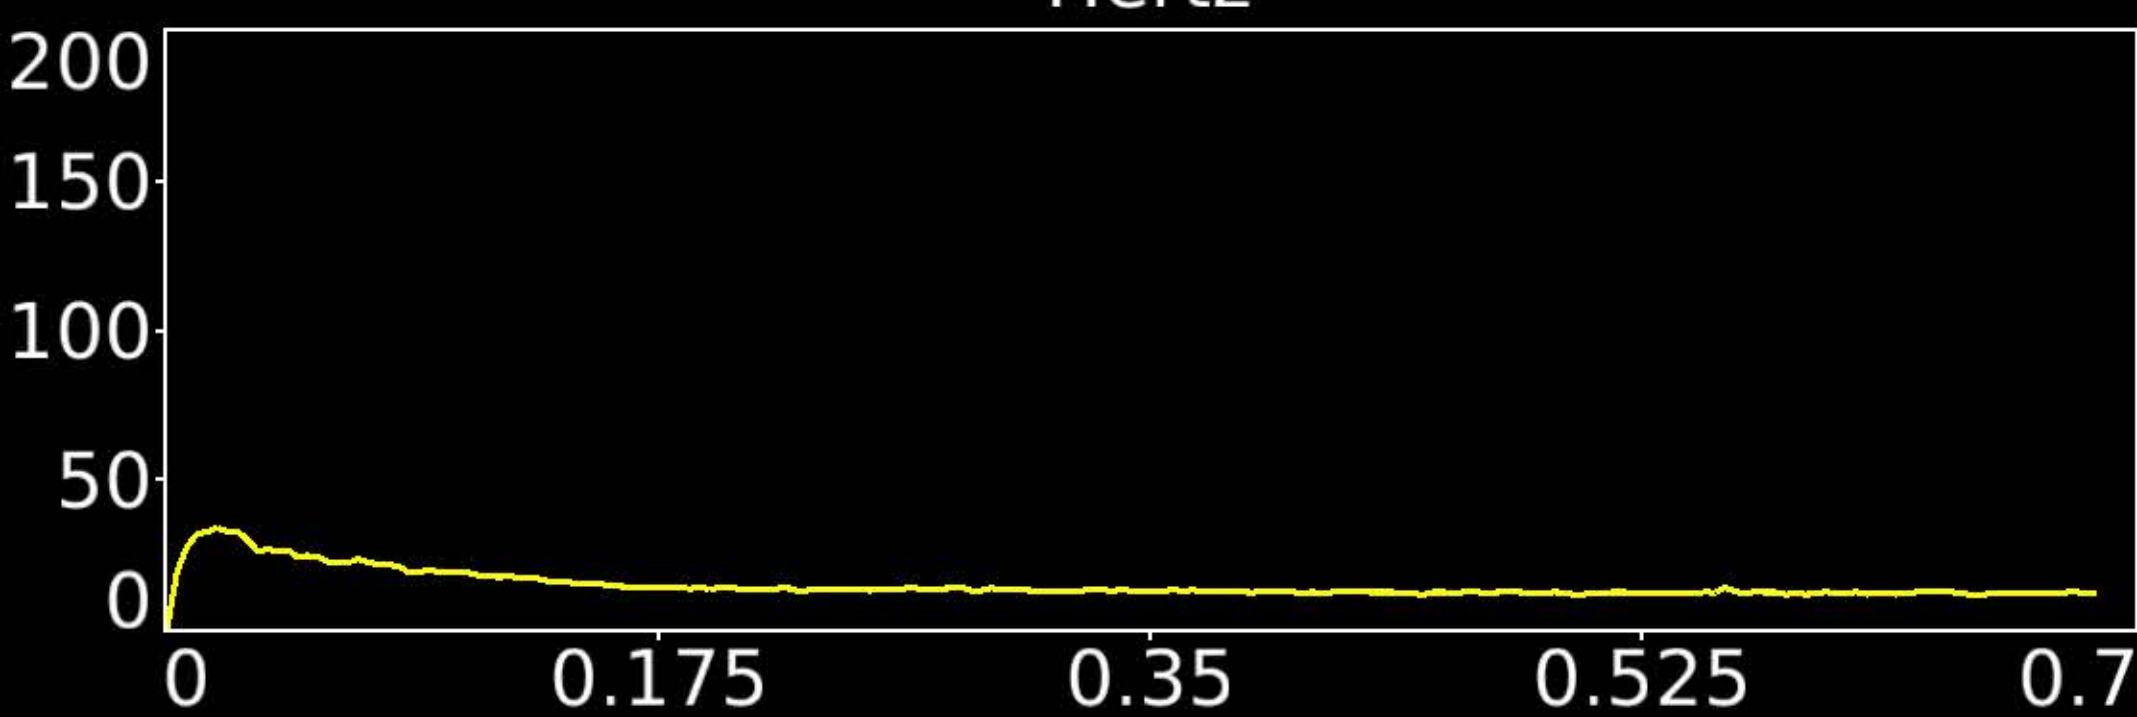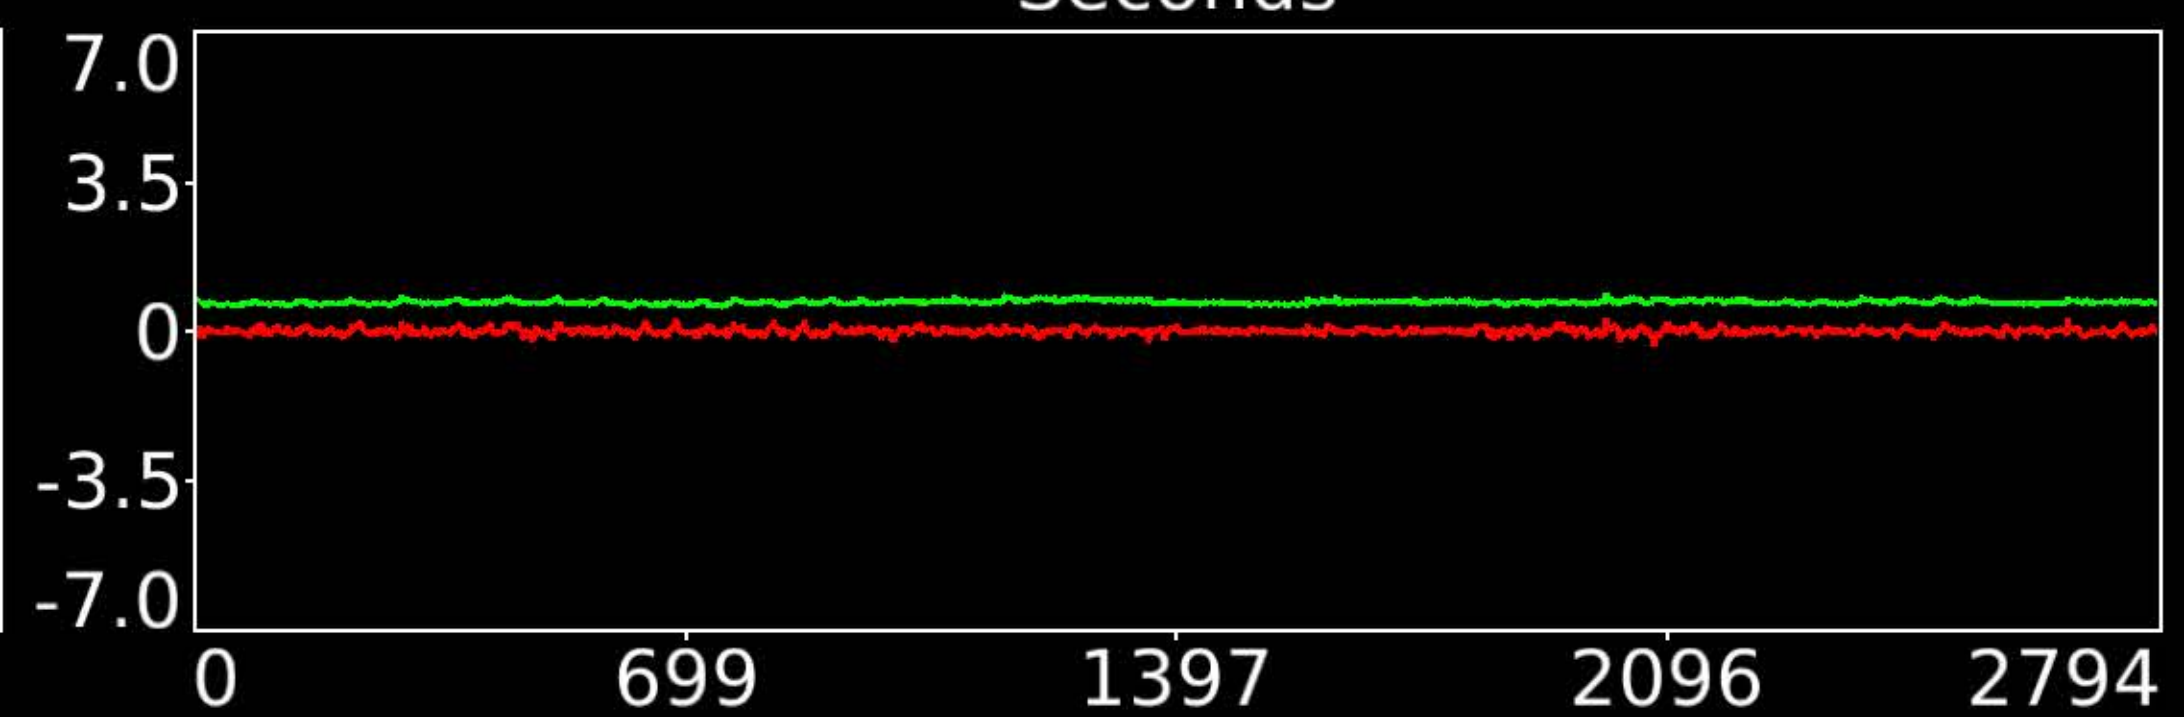

|                          |                            |                                          |  |
|--------------------------|----------------------------|------------------------------------------|--|
| Number & Class: 47 Noise |                            | Name: Cerebellar Movement Artifact Right |  |
| RVT Correlated: No       | DVARS Dip Associated: Yes  | Cross-Subject Variable: No               |  |
| Single Subject: Yes      | % Variance Explained: 0.78 | Globality Index: 0.33                    |  |
| Rest Component: No       | Taskr Component: 45        | Task Modulated: No                       |  |

Rationale: Cerebellar edge motion component with high correlation to DVARS dips; looks like movement regressor beta map (derivative of X translation)



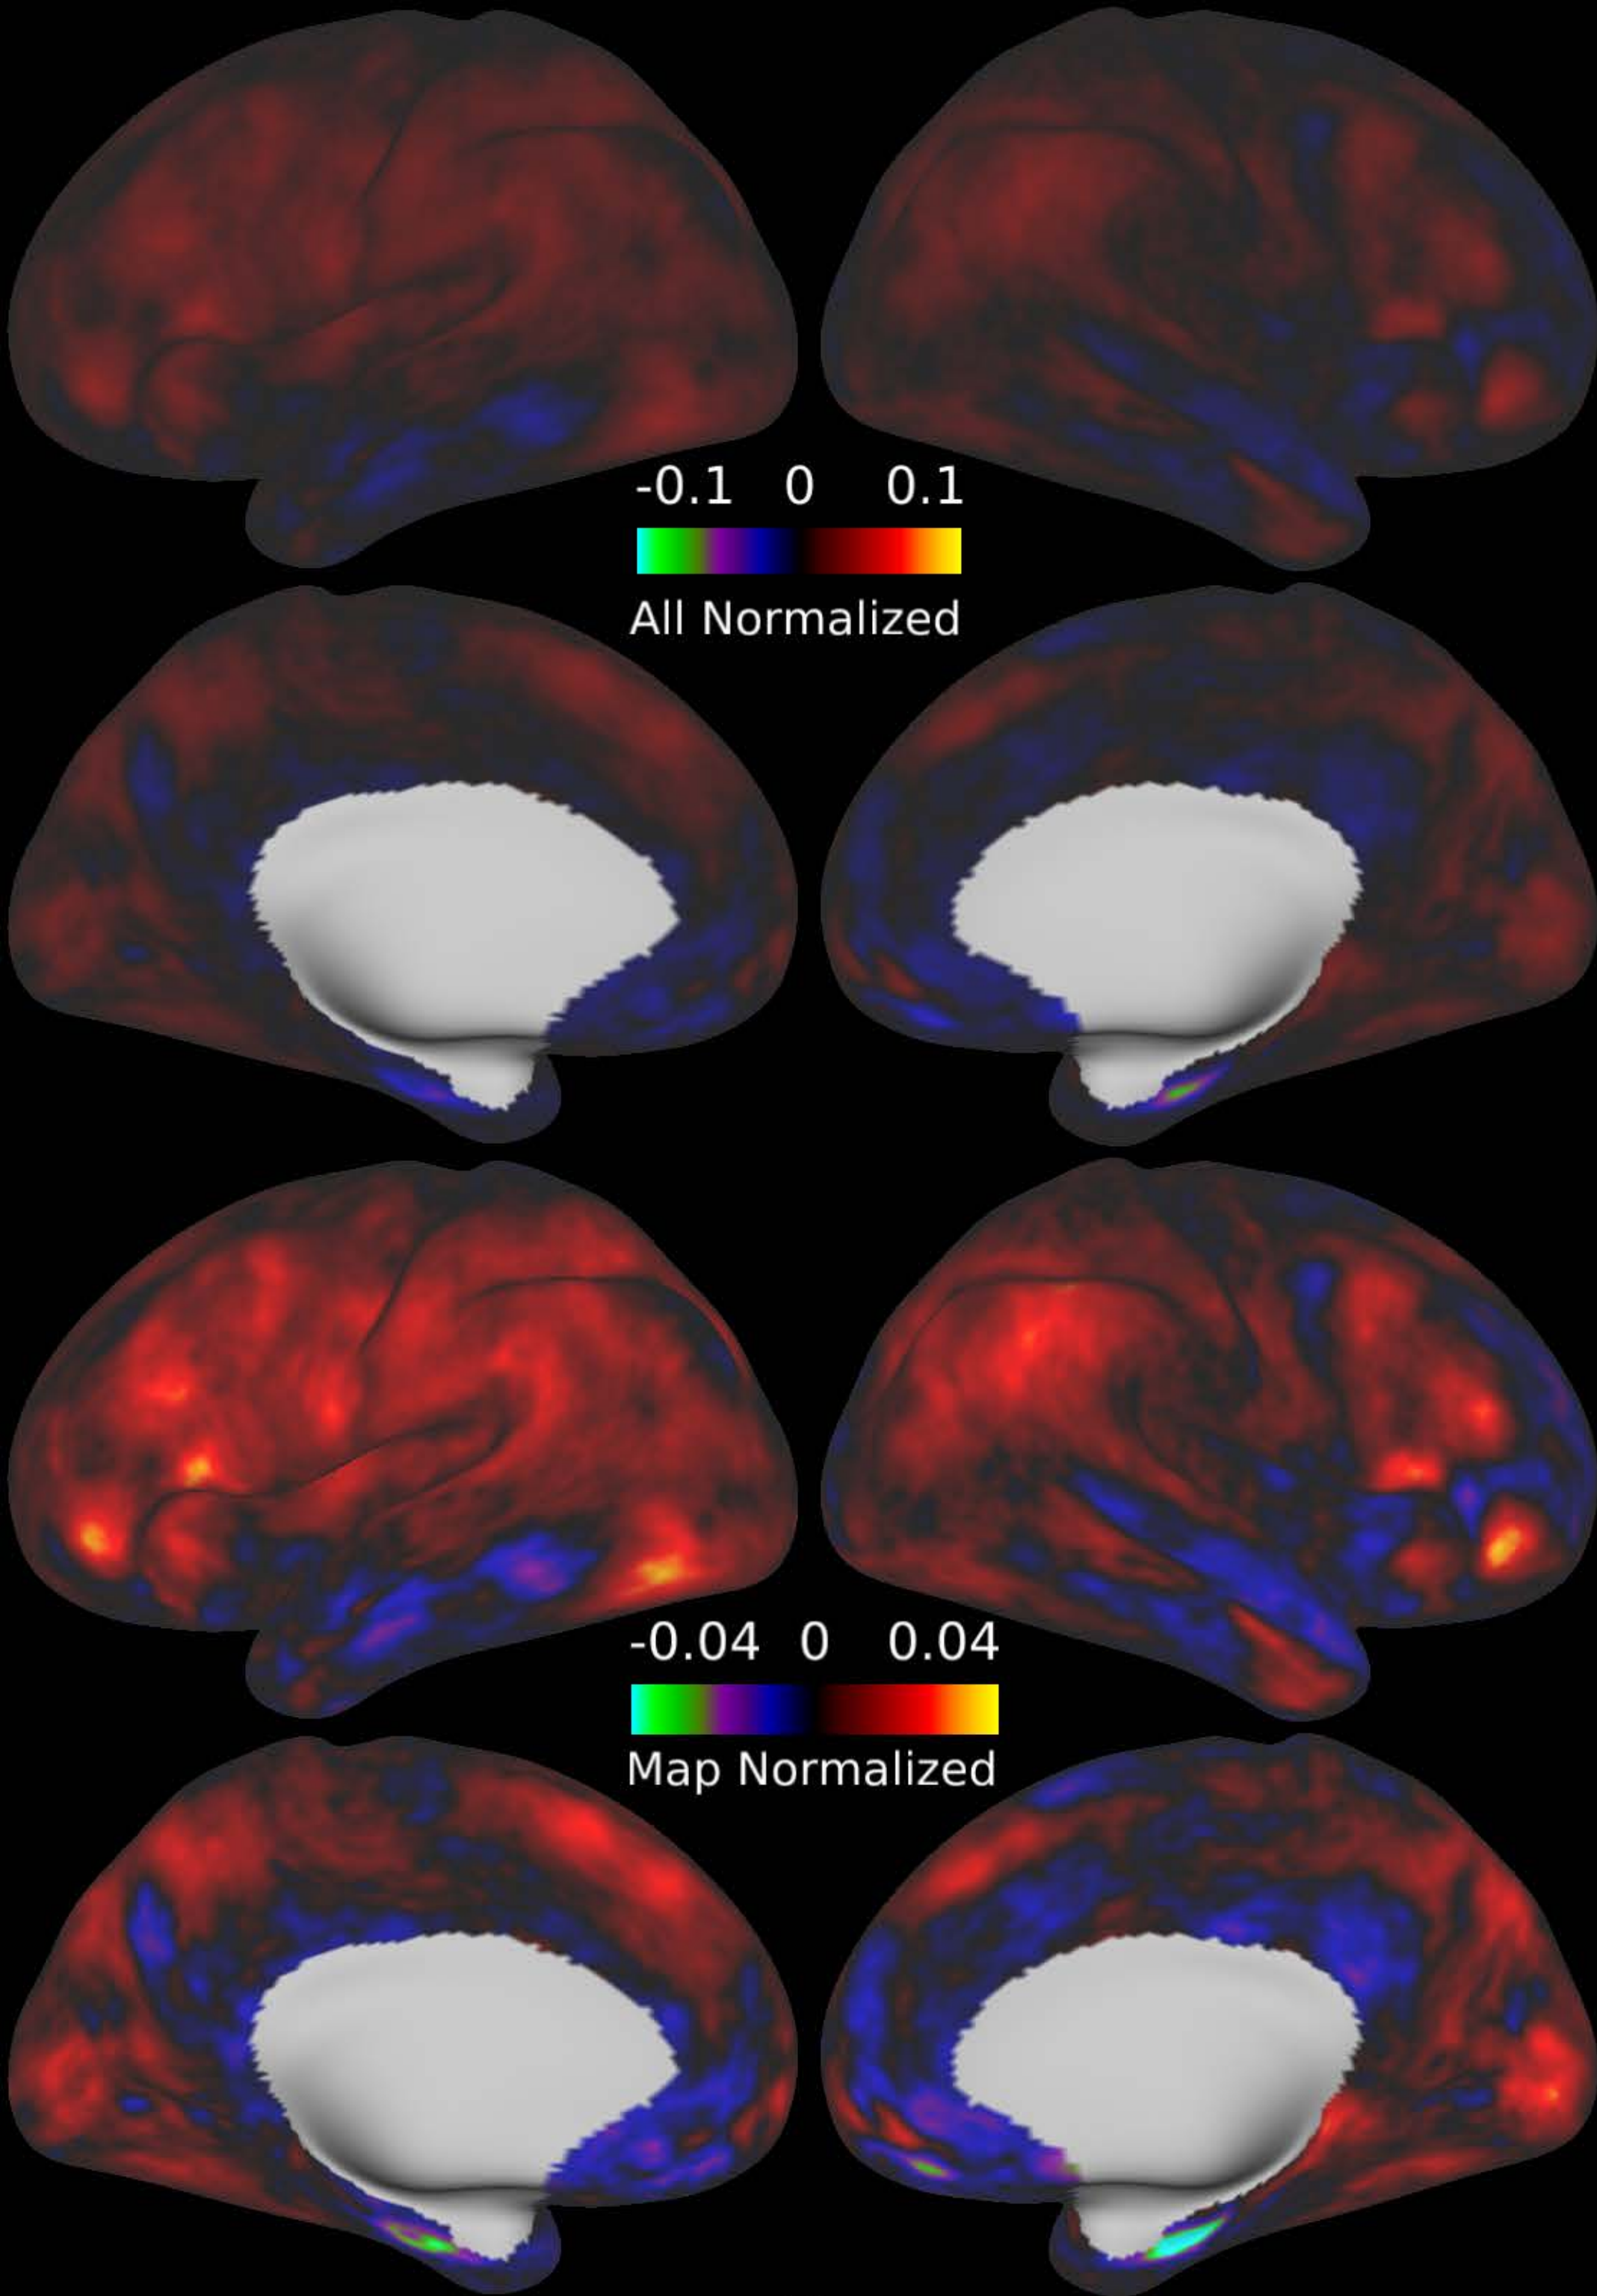

Hertz

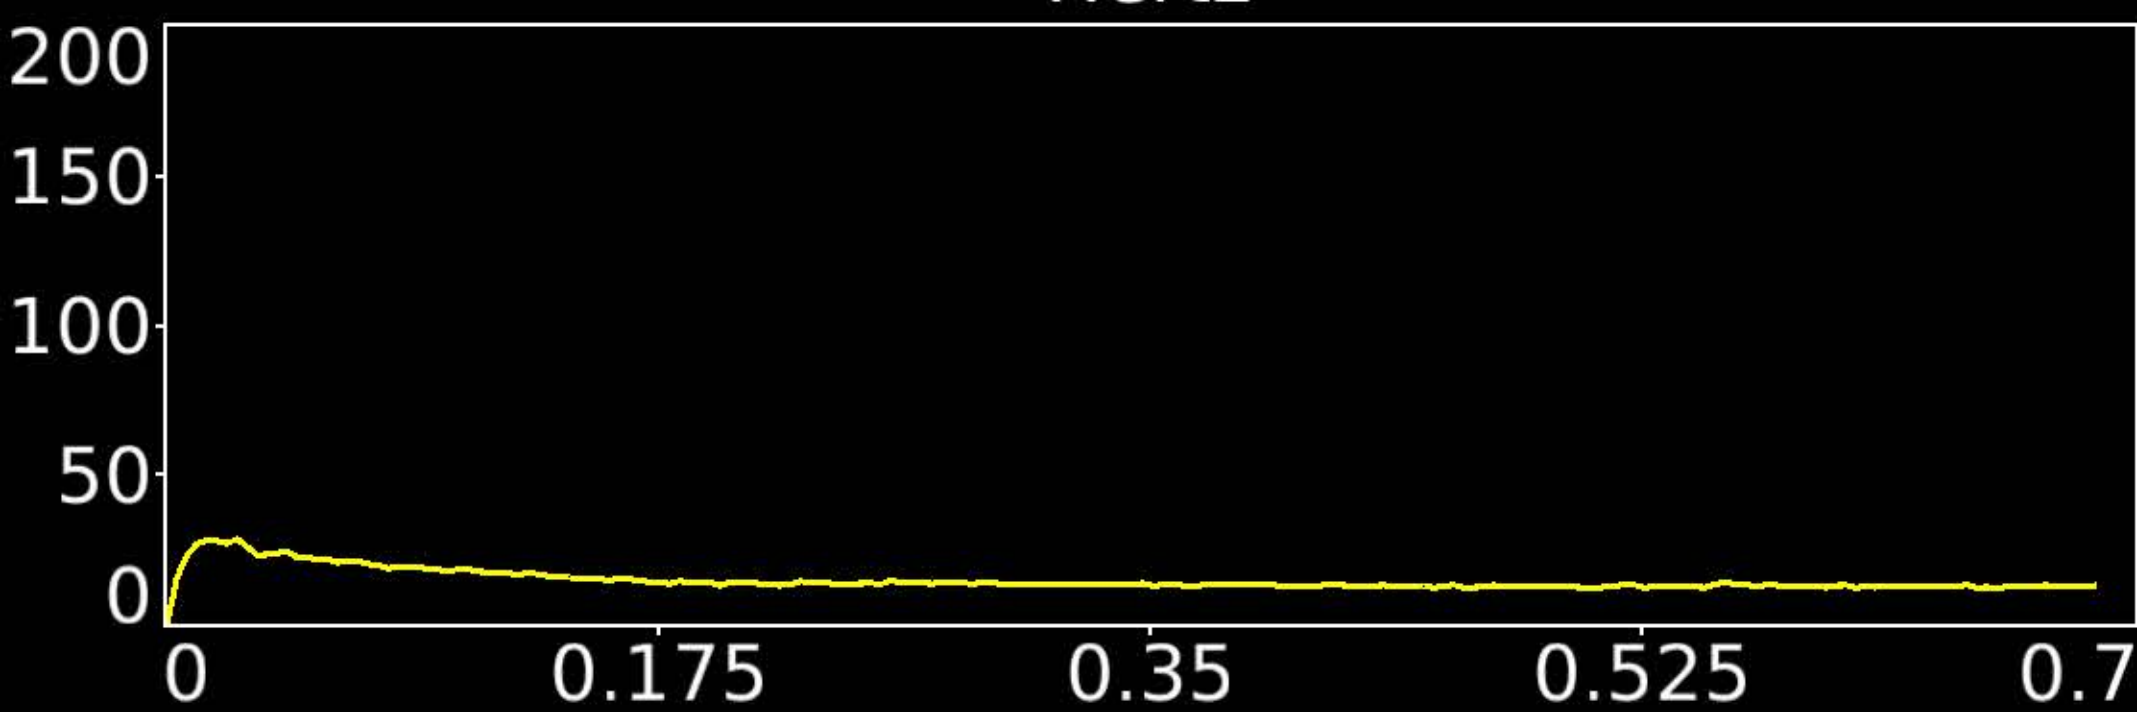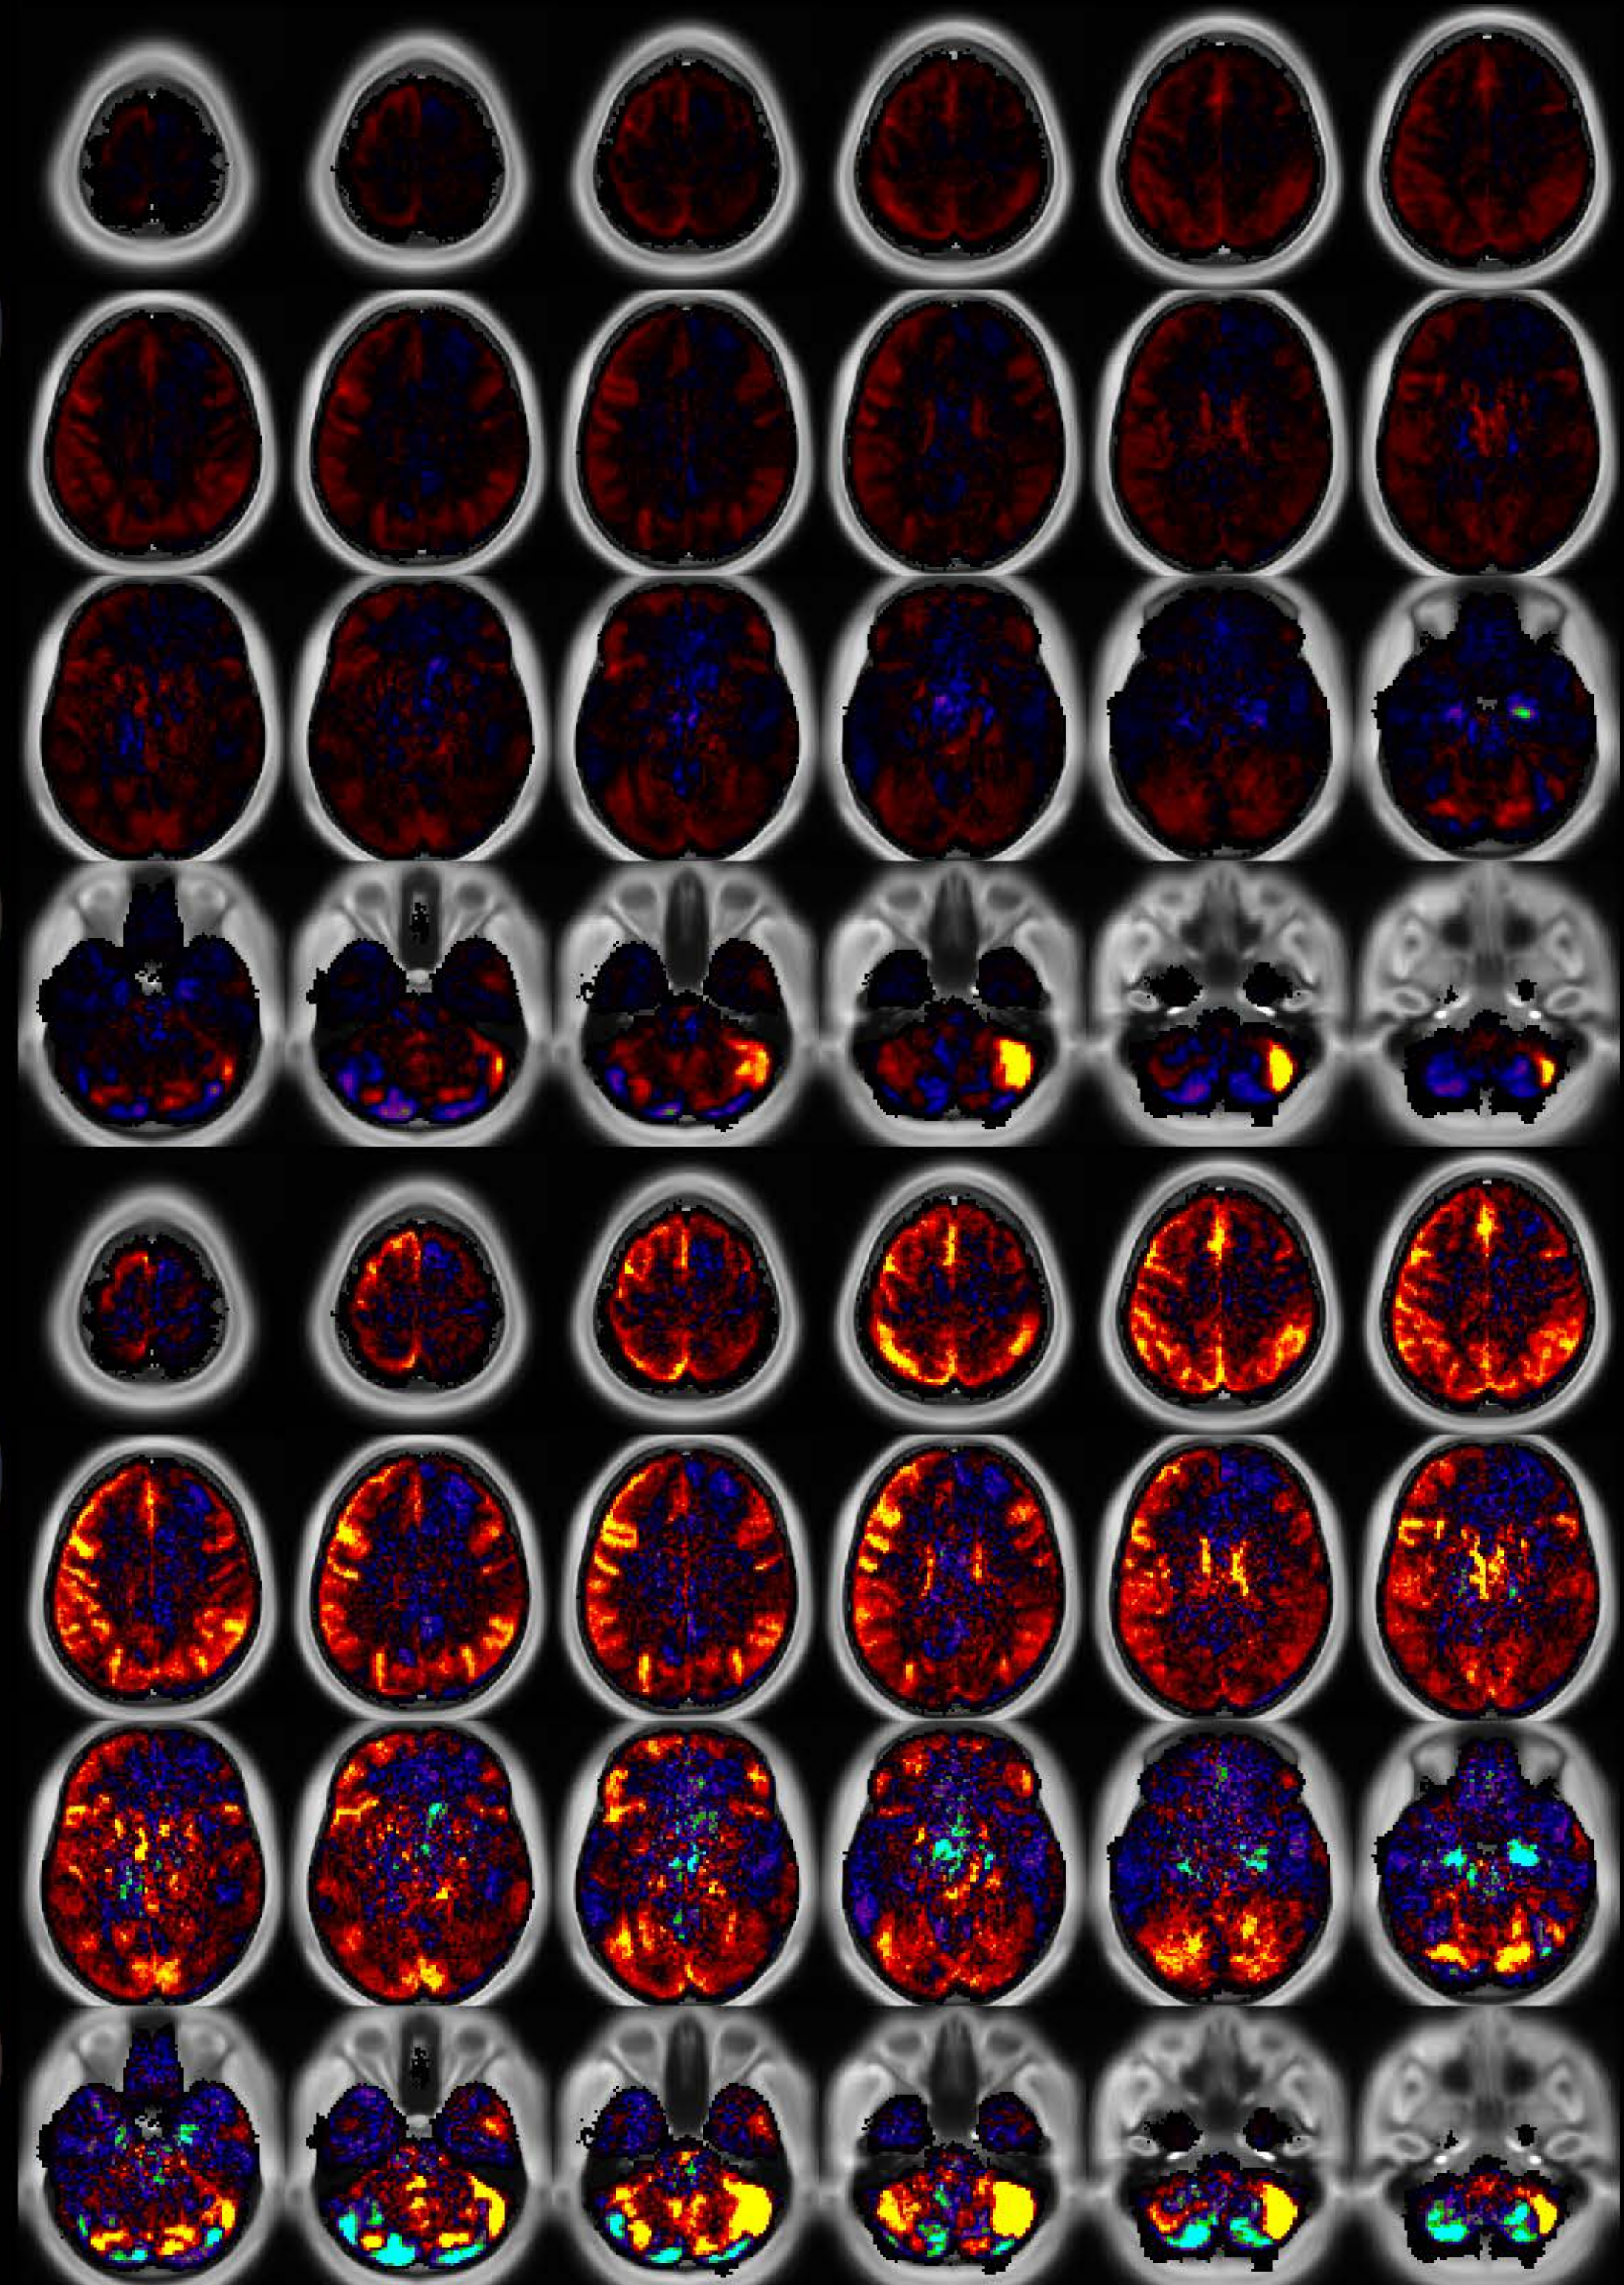

Seconds

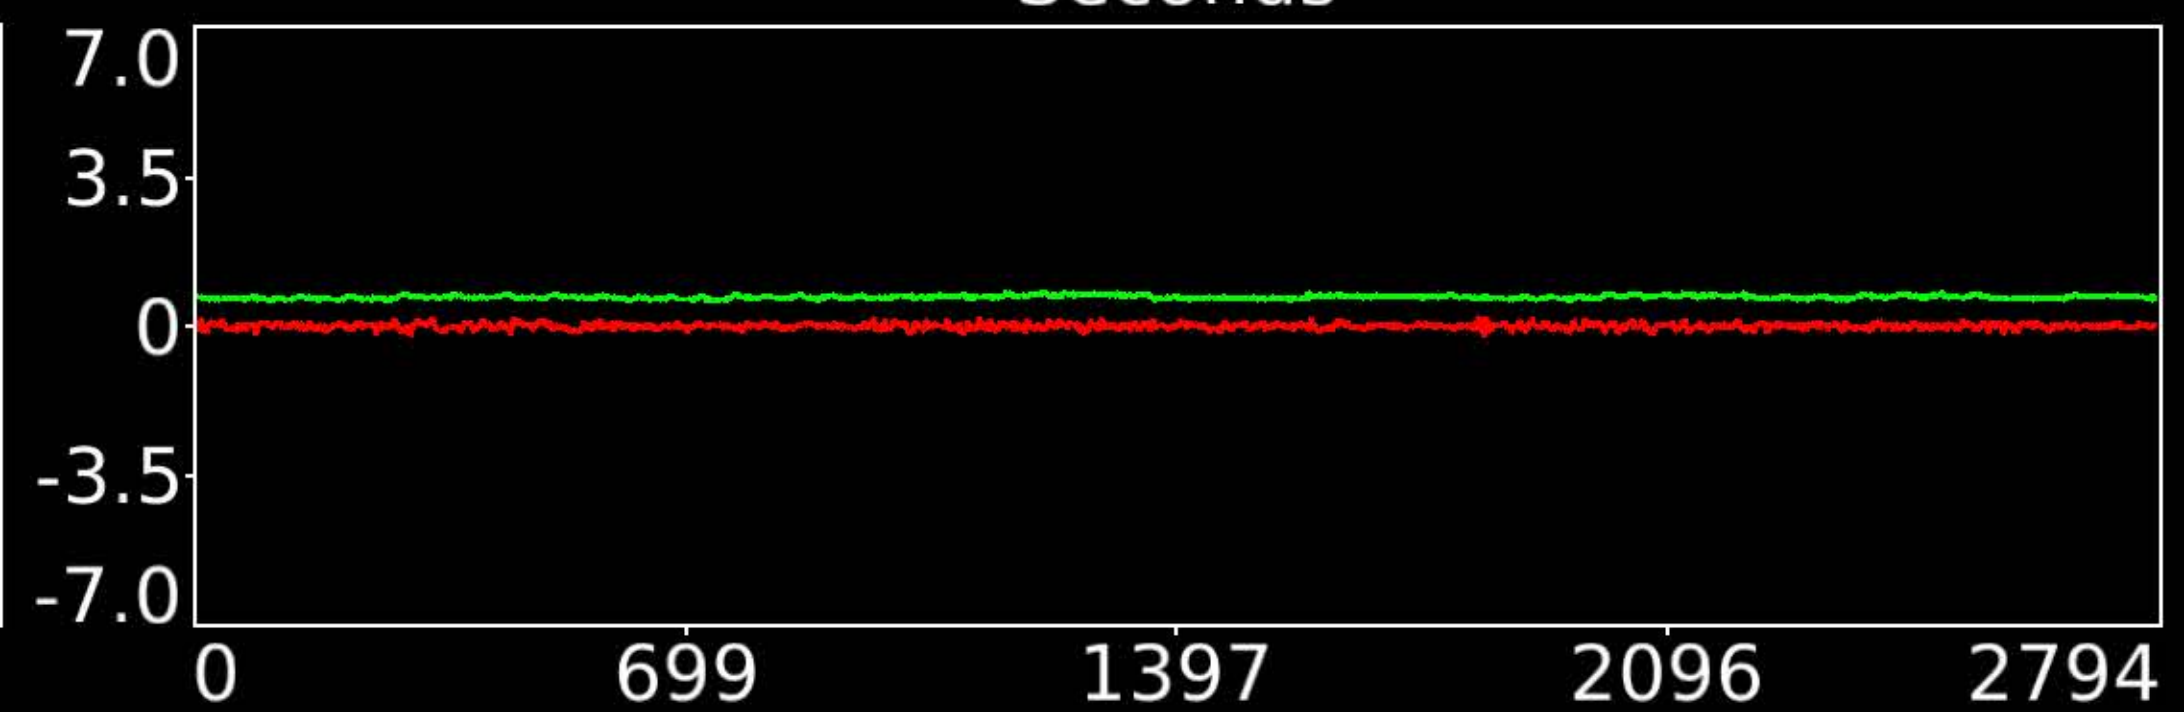

|                                                                                                        |                            |                                                   |  |
|--------------------------------------------------------------------------------------------------------|----------------------------|---------------------------------------------------|--|
| Number & Class: 48 Noise                                                                               |                            | Name: R Cerebellum Near Sigmoid Sinus DVARS Assoc |  |
| RVT Correlated: No                                                                                     | DVARS Dip Associated: Yes  | Cross-Subject Variable: No                        |  |
| Single Subject: Yes                                                                                    | % Variance Explained: 0.77 | Globality Index: 1.01                             |  |
| Rest Component: No                                                                                     | Taskr Component: 52        | Task Modulated: No                                |  |
| Rationale: Cerebellar edge motion component with high correlation to DVARS dips; likely motion related |                            |                                                   |  |



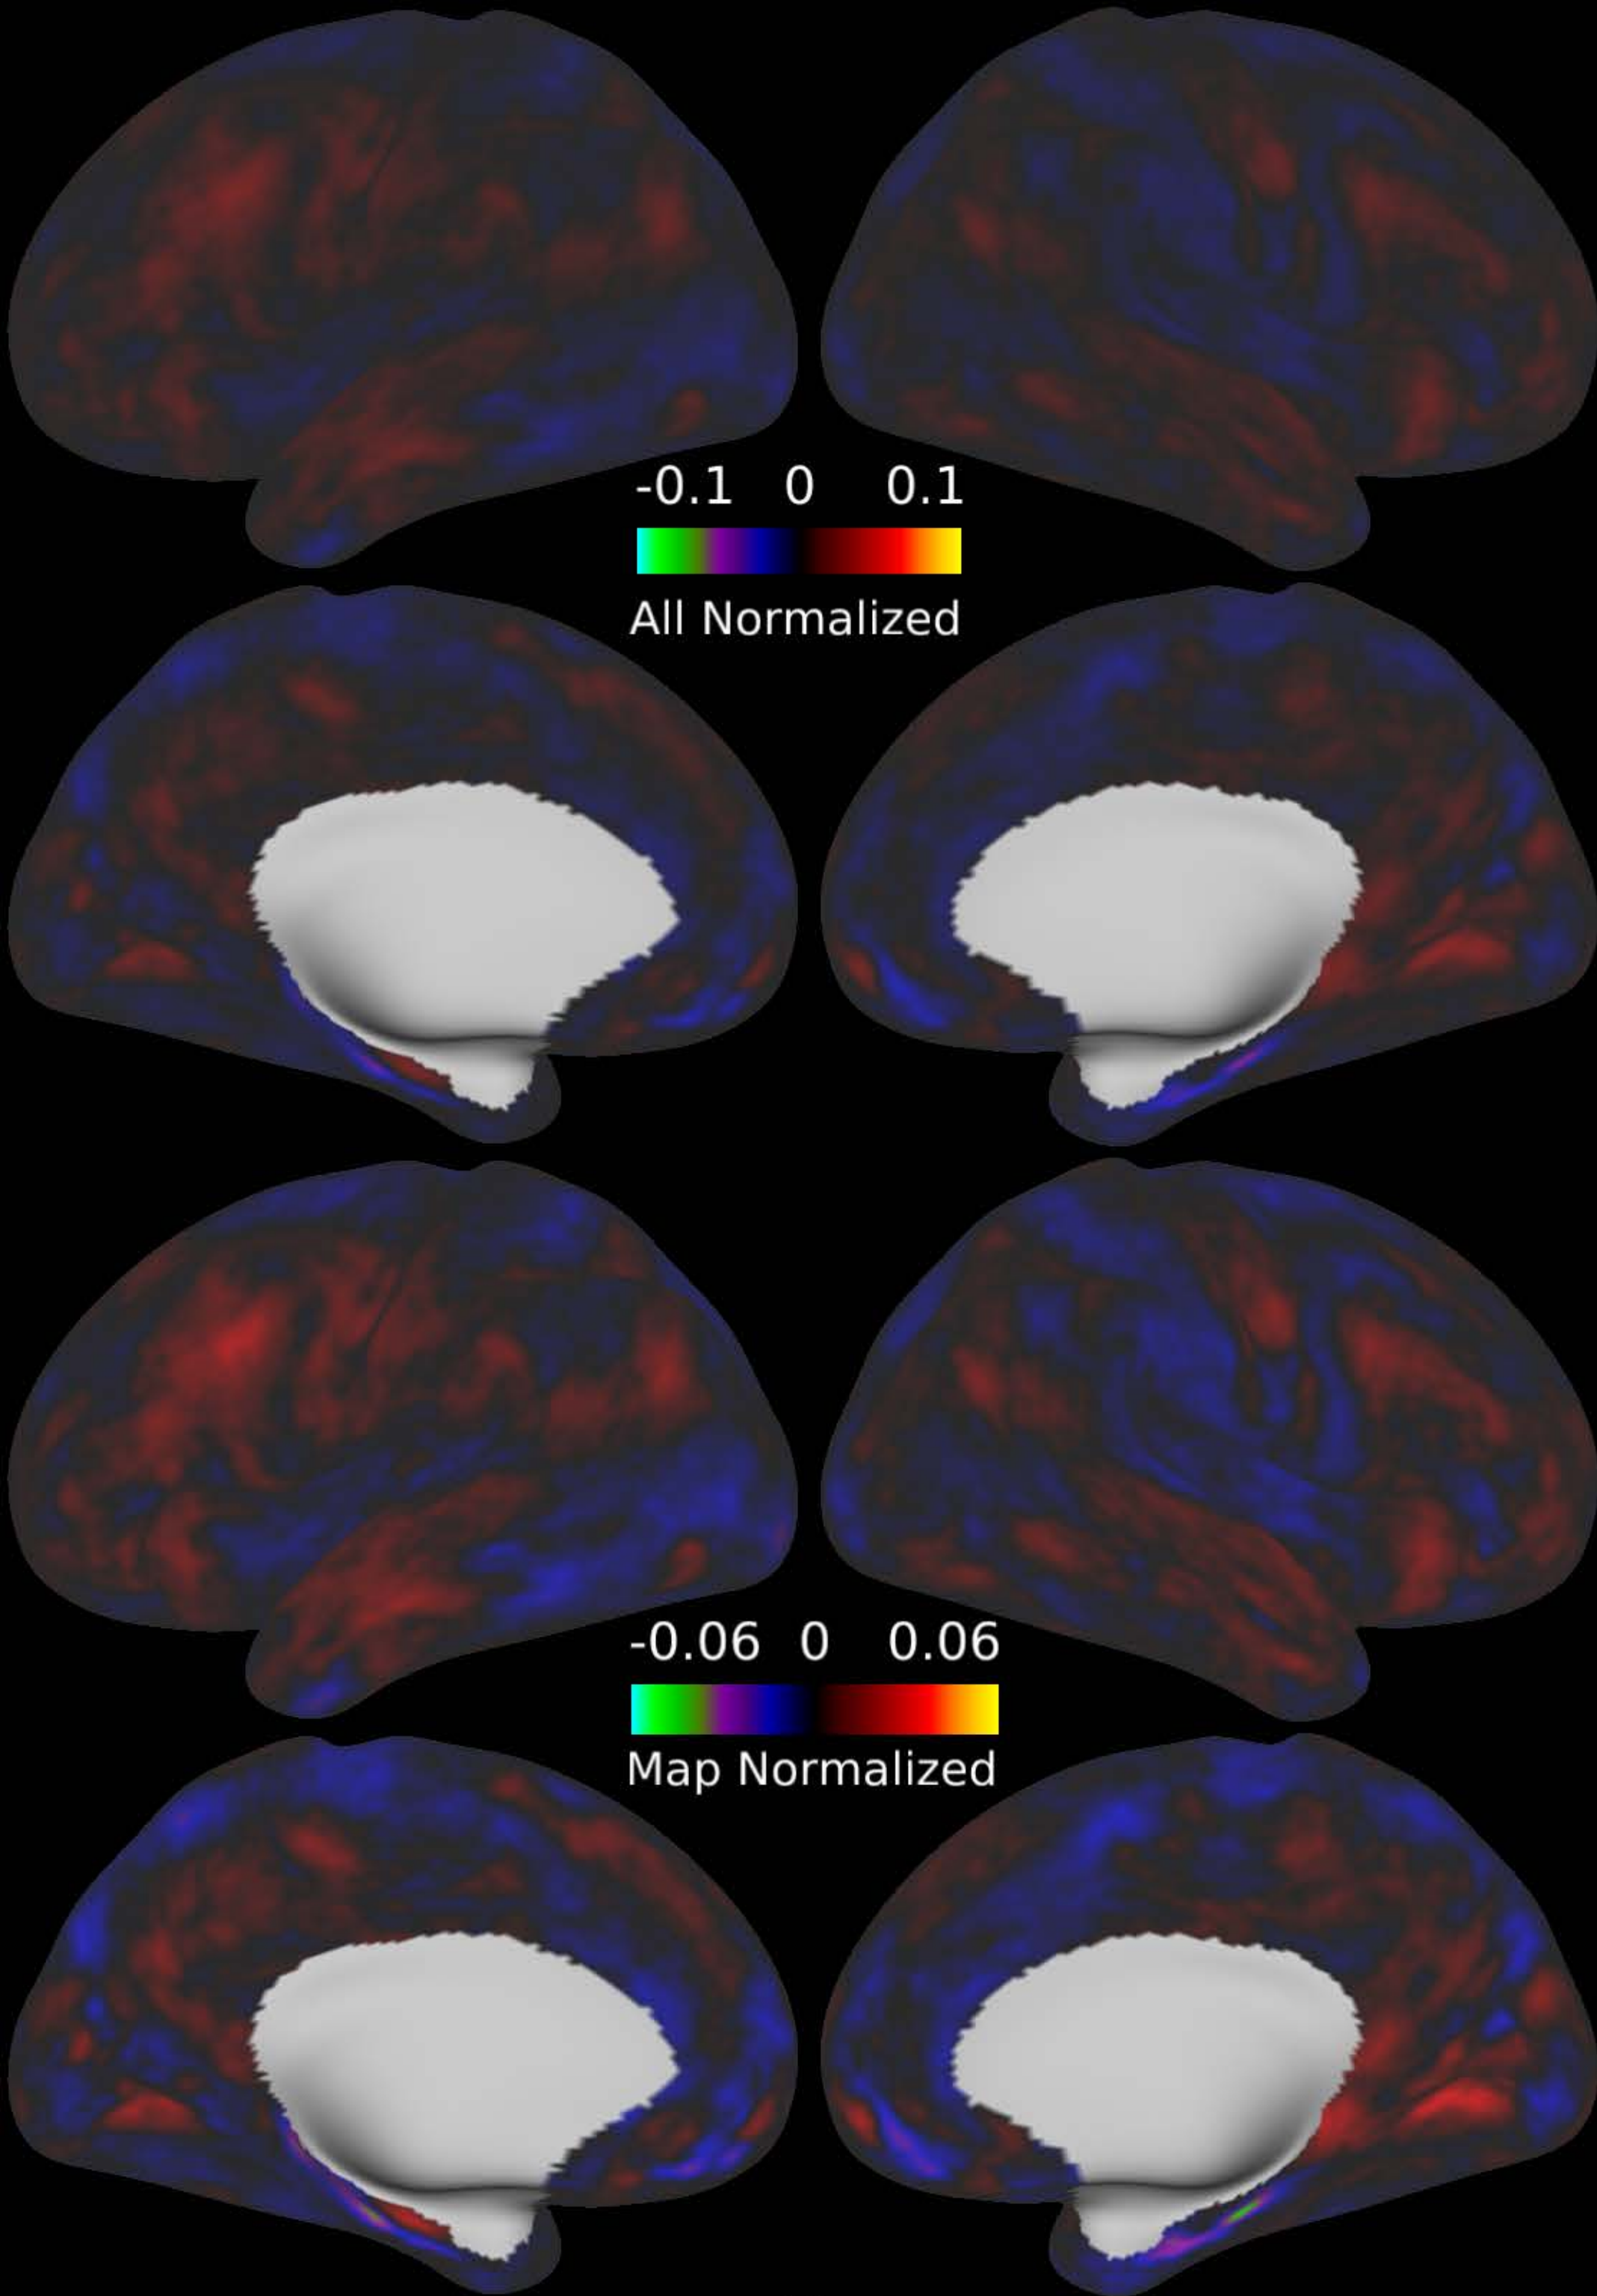

Hertz

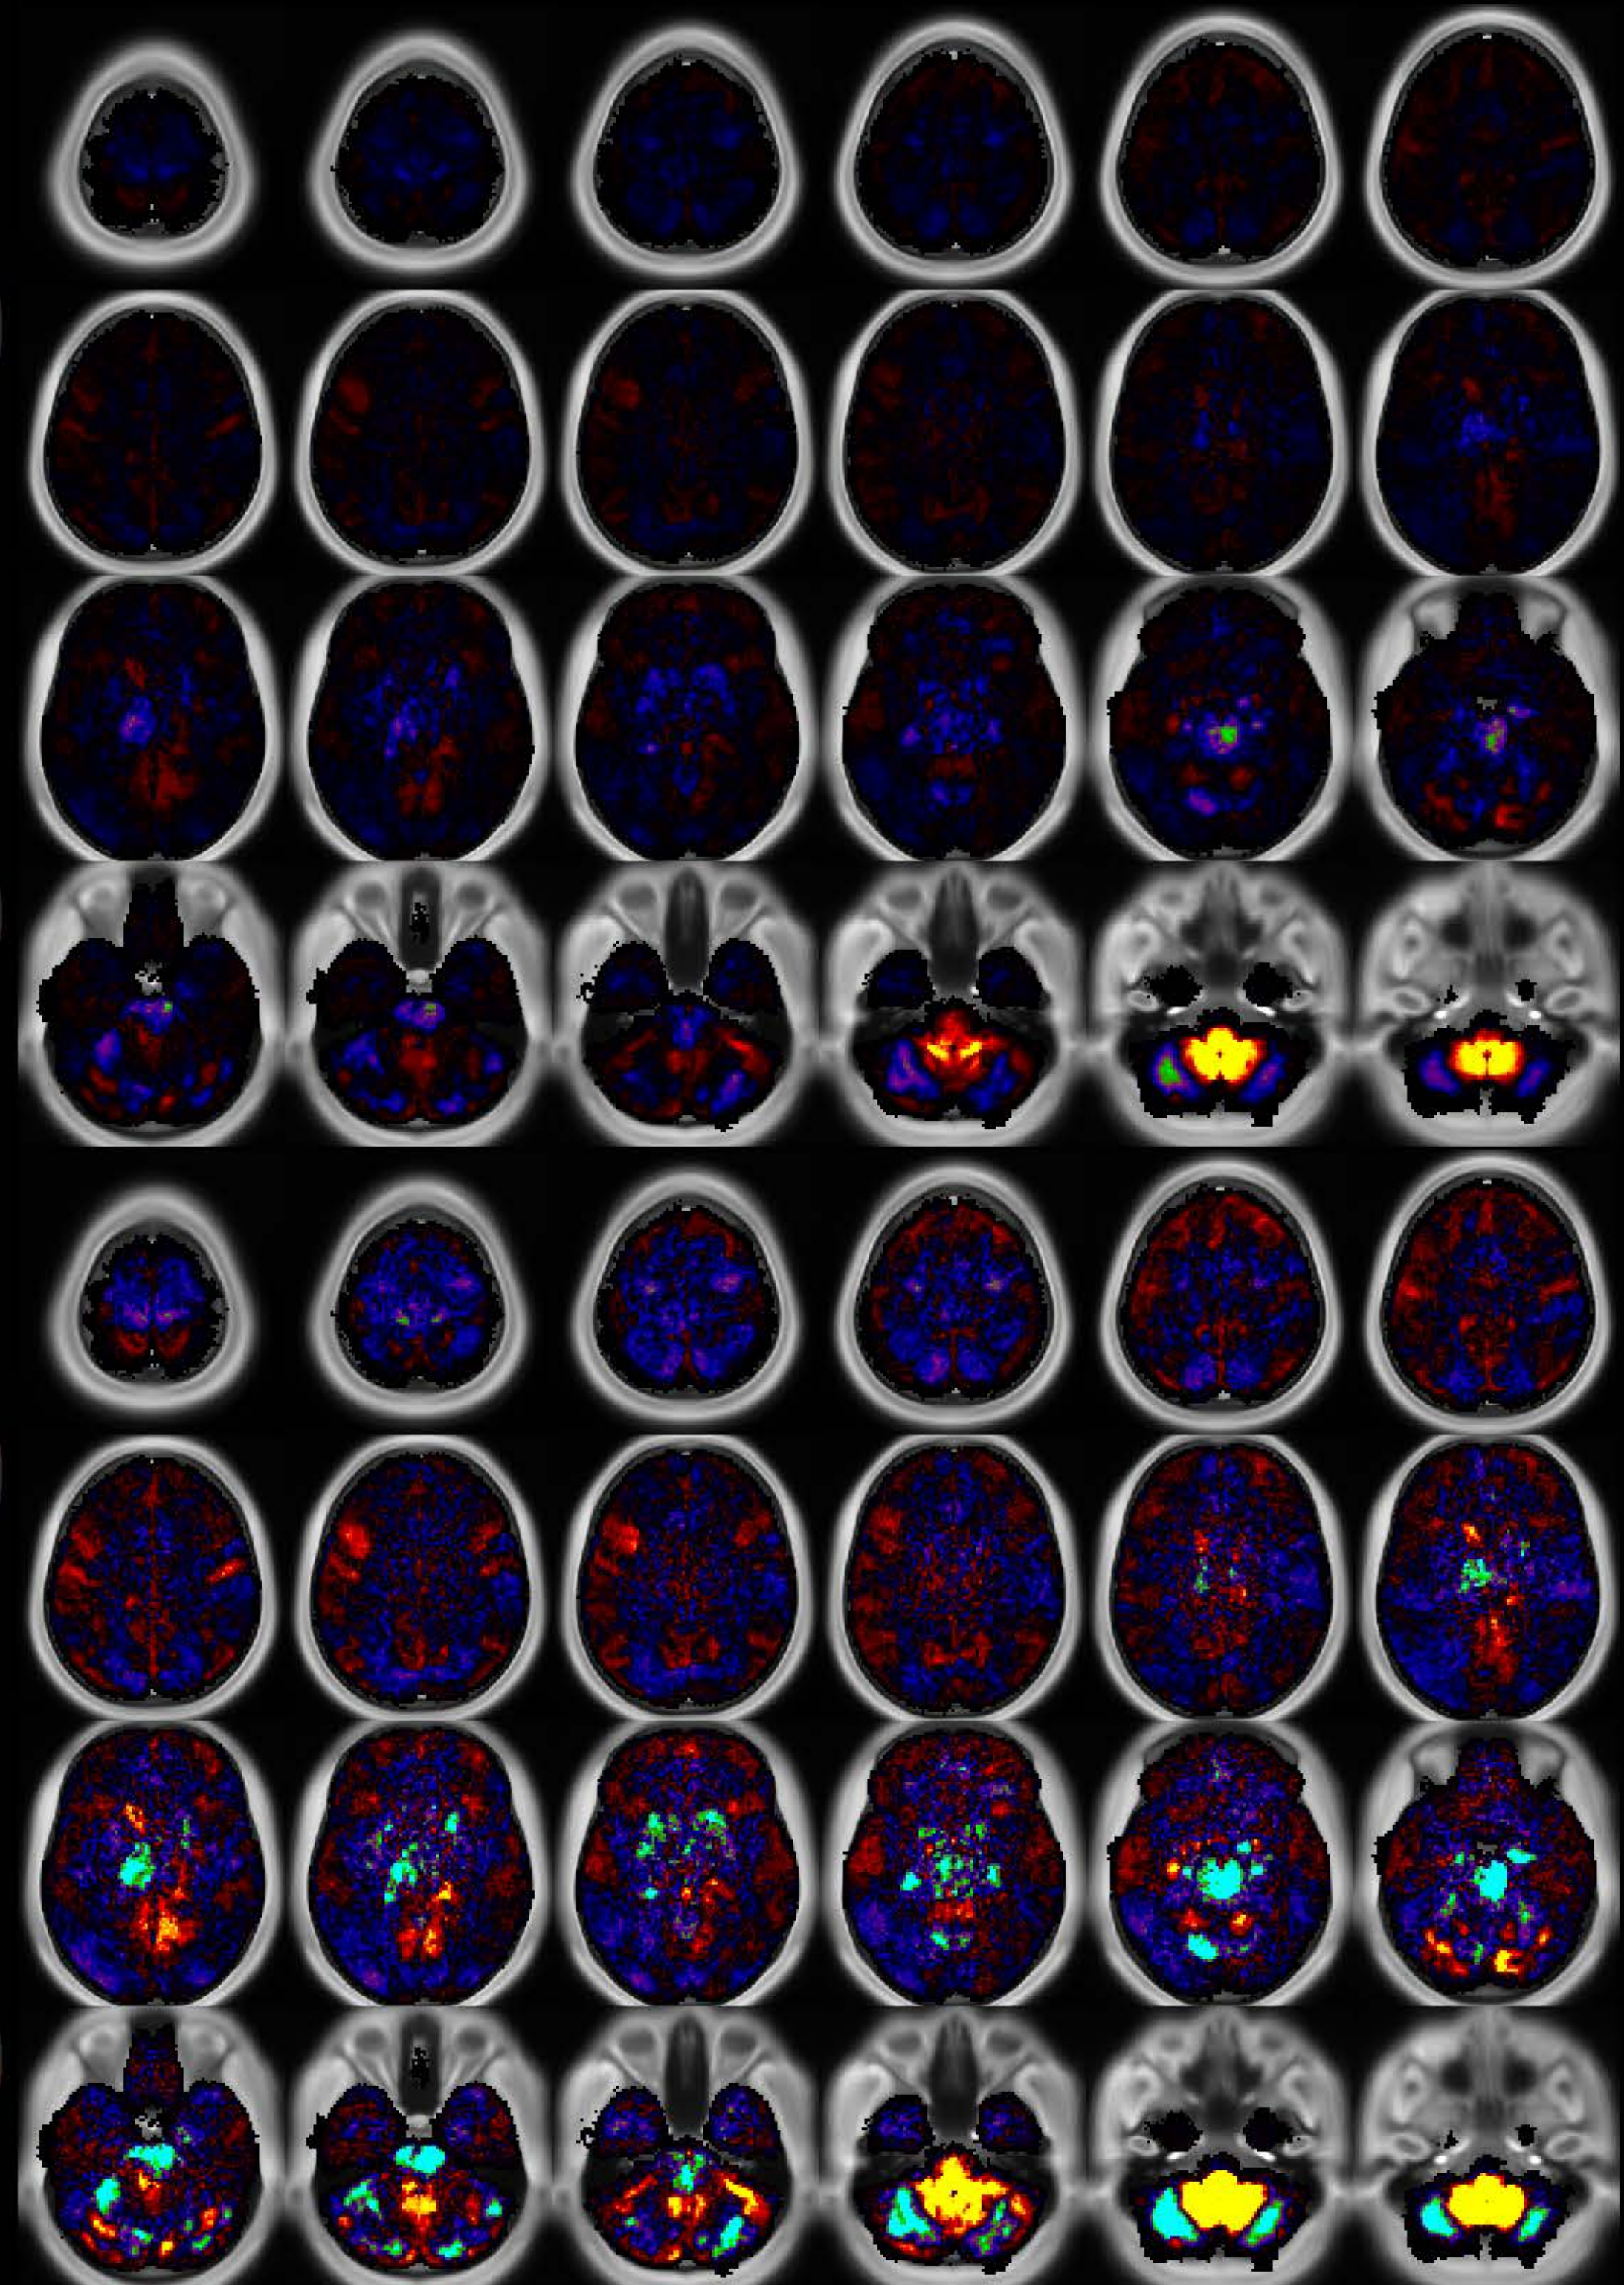

Seconds

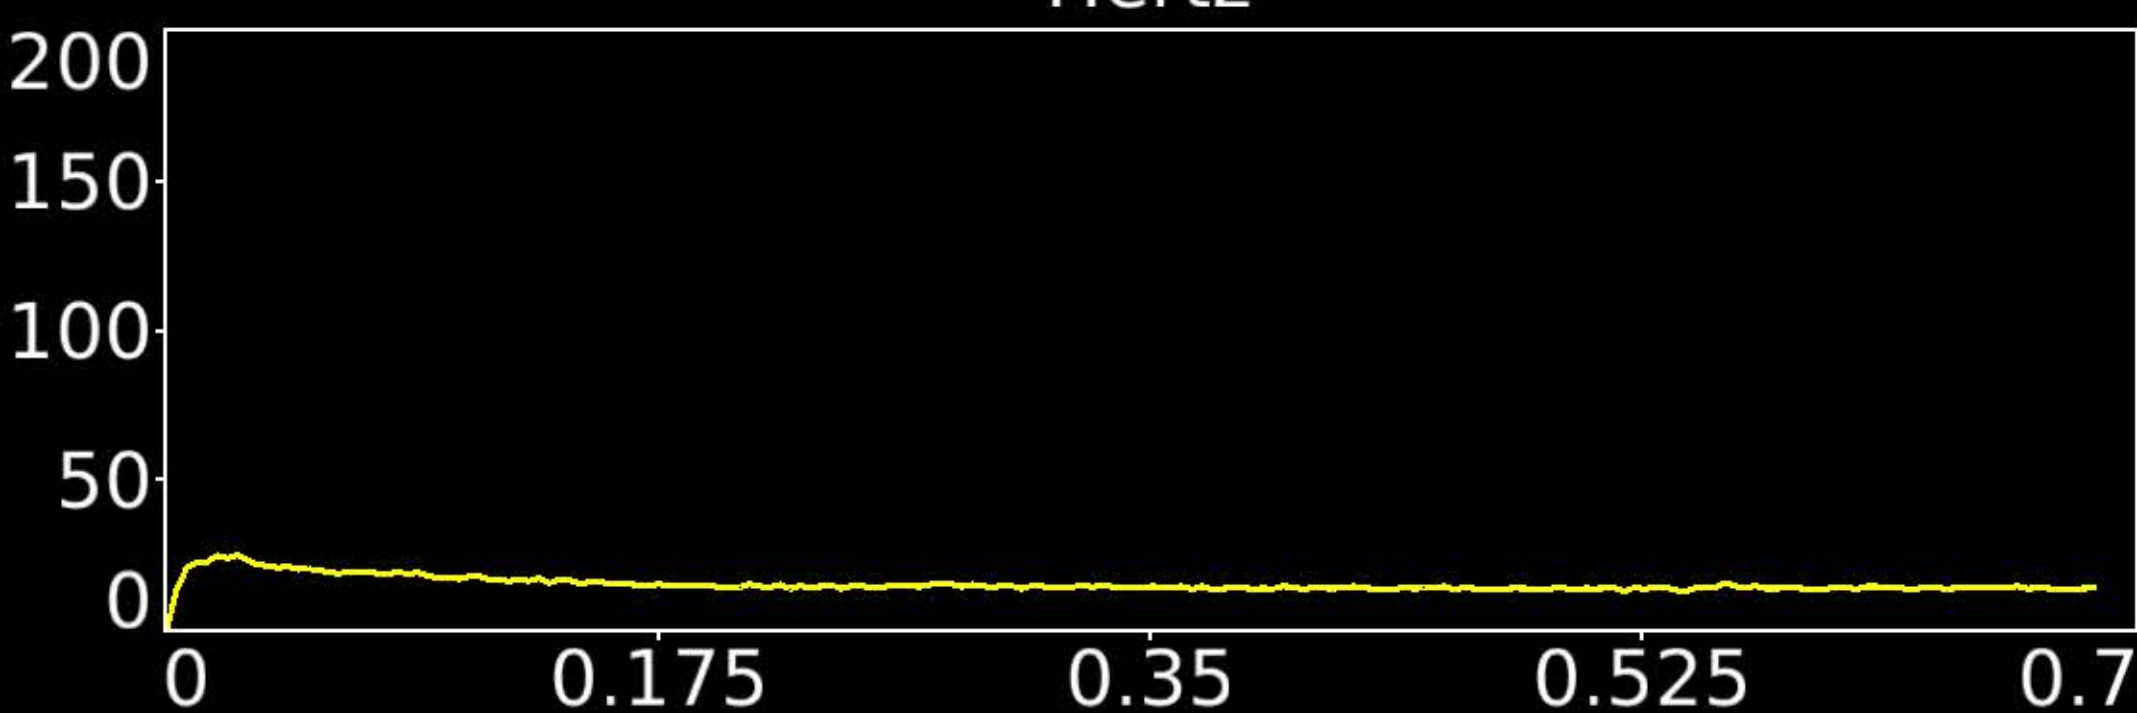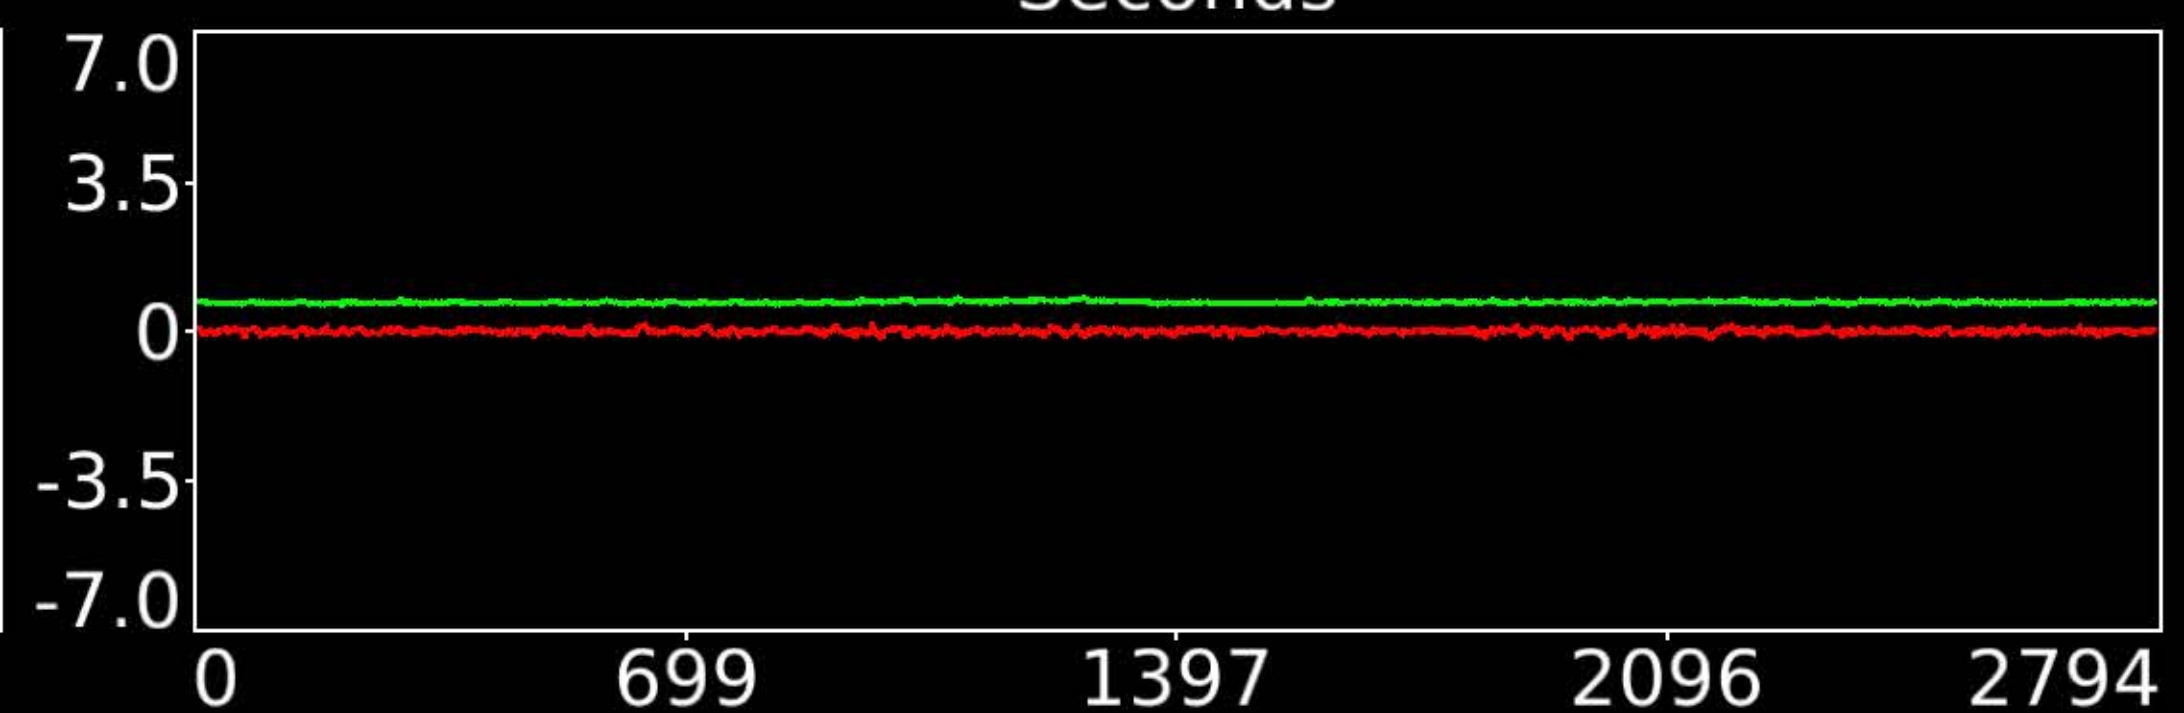

|                          |                            |                                             |  |
|--------------------------|----------------------------|---------------------------------------------|--|
| Number & Class: 49 Noise |                            | Name: Cerebellar + Brainstem Recon Artifact |  |
| RVT Correlated: No       | DVARS Dip Associated: No   | Cross-Subject Variable: No                  |  |
| Single Subject: Yes      | % Variance Explained: 0.77 | Globality Index: 0.4                        |  |
| Rest Component: No       | Taskr Component: 43        | Task Modulated: No                          |  |

Rationale: Spatial map not reflective of known areas or RSNs without connectivity other brain structures; some banding in sagittal plane suggestive of multi-band recon



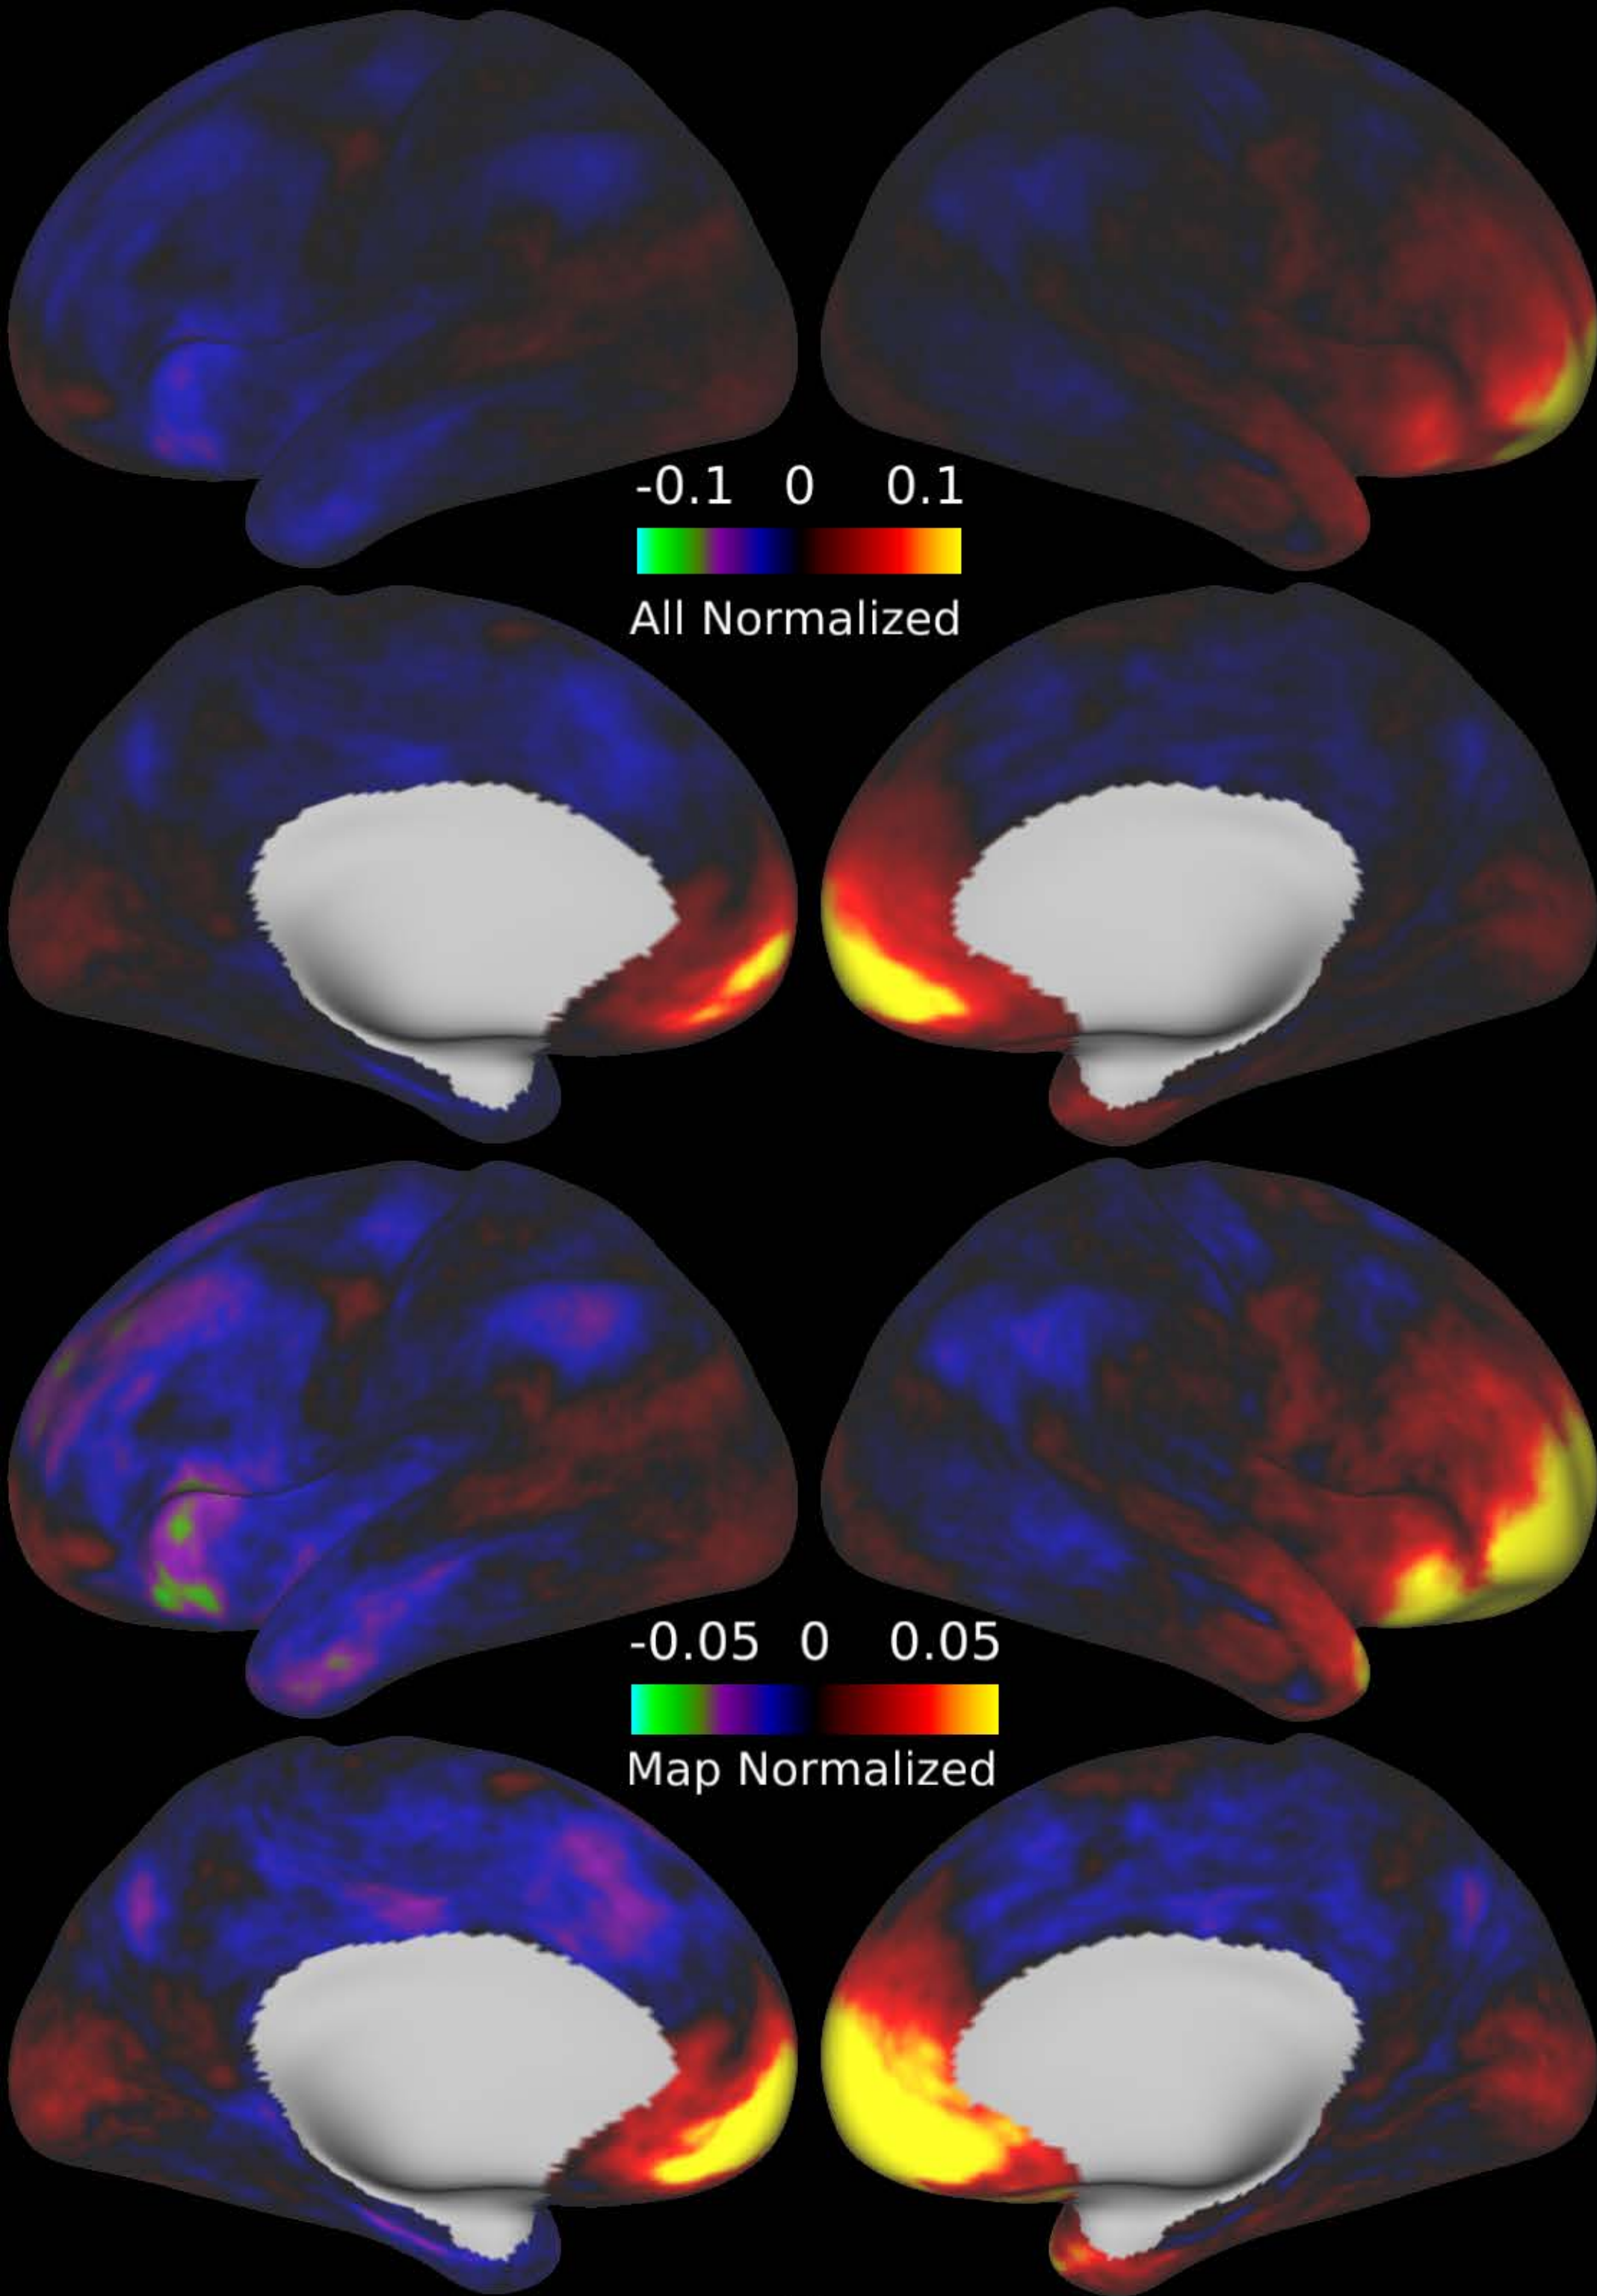

Hertz

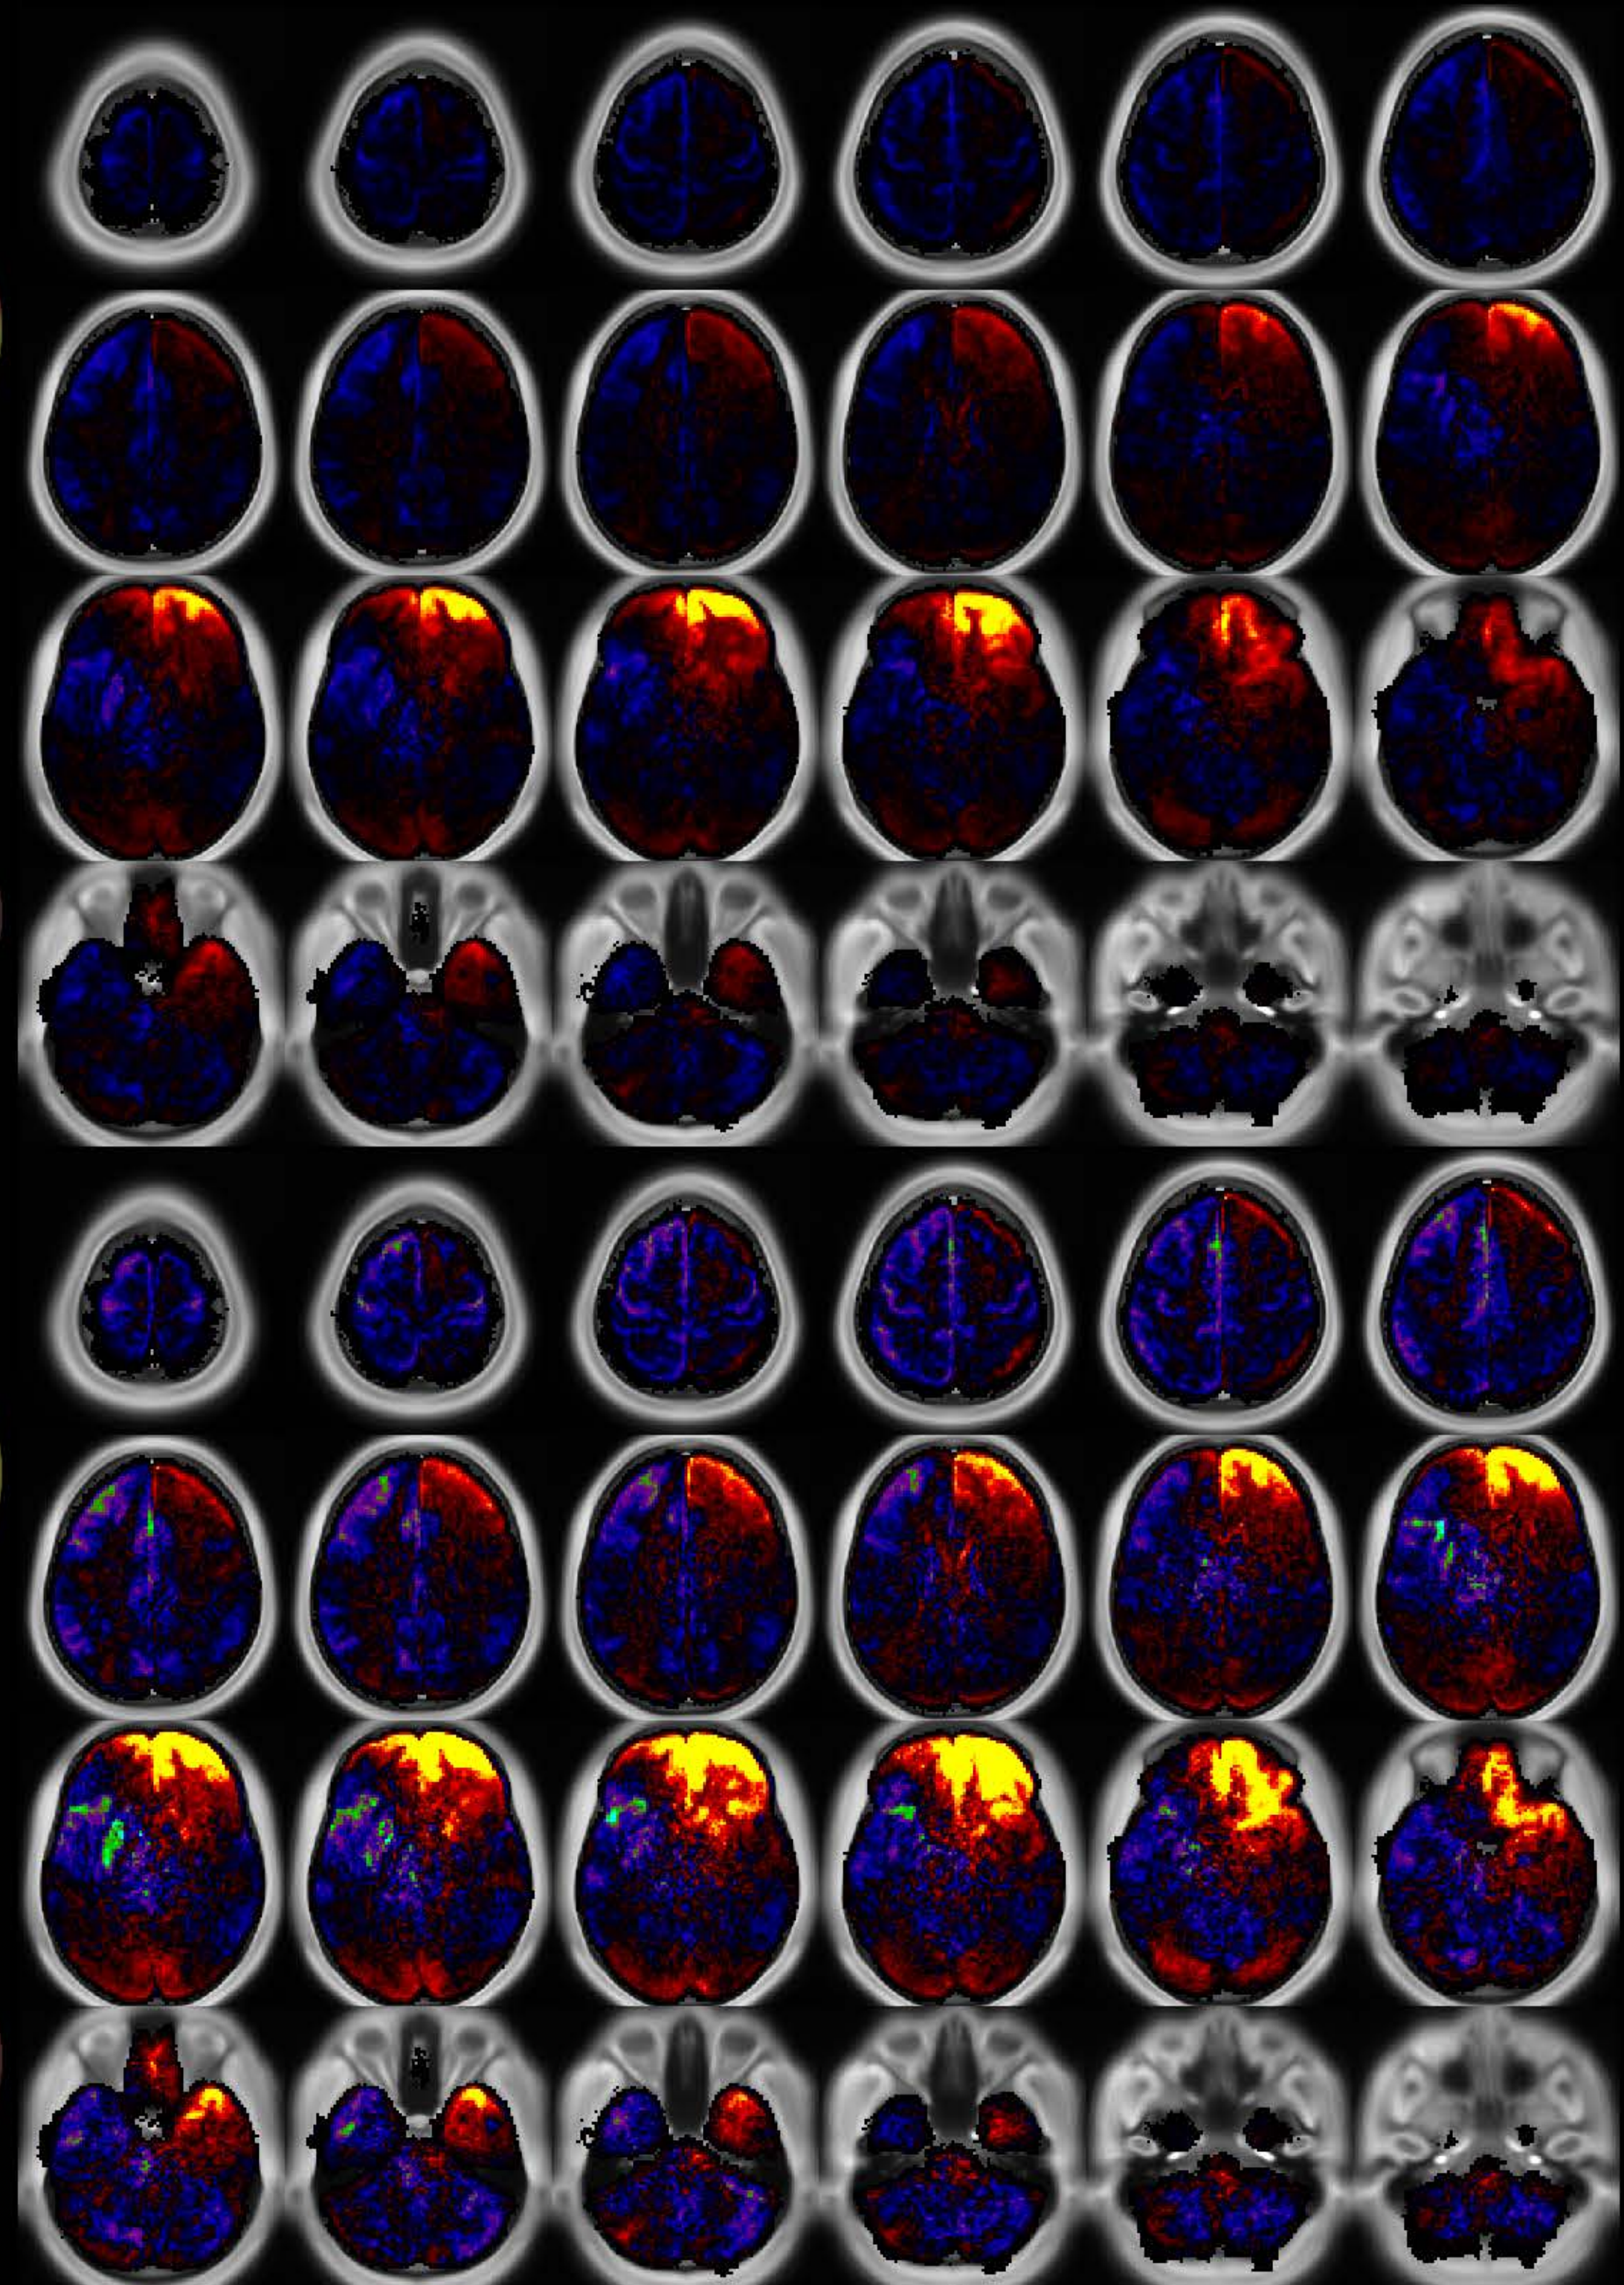

Seconds

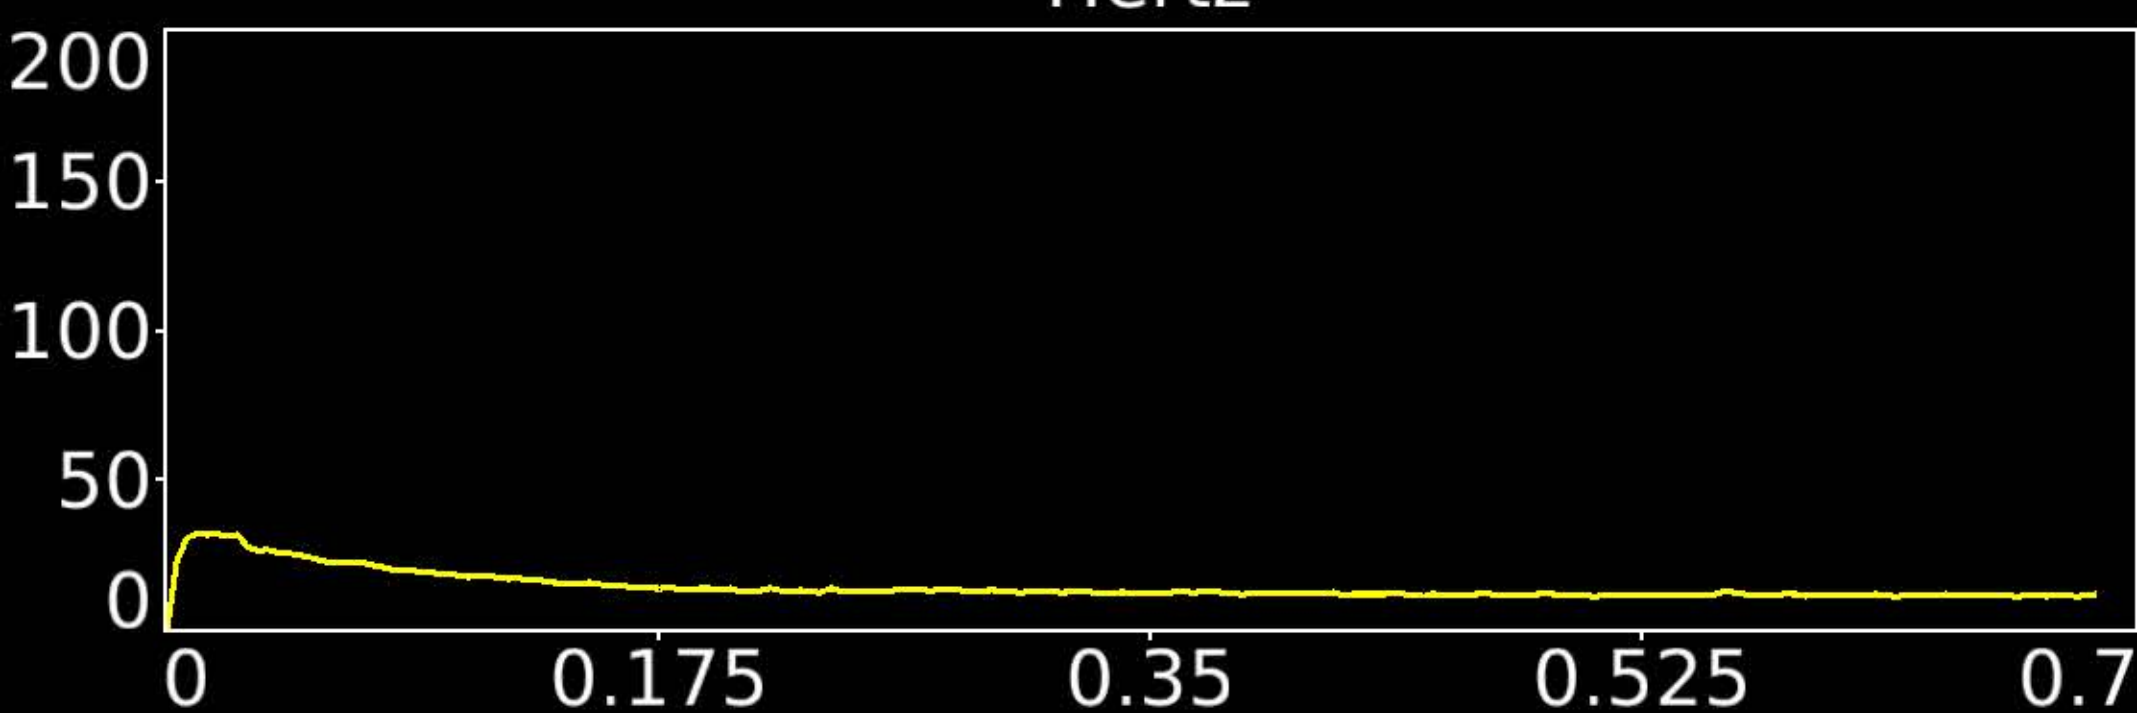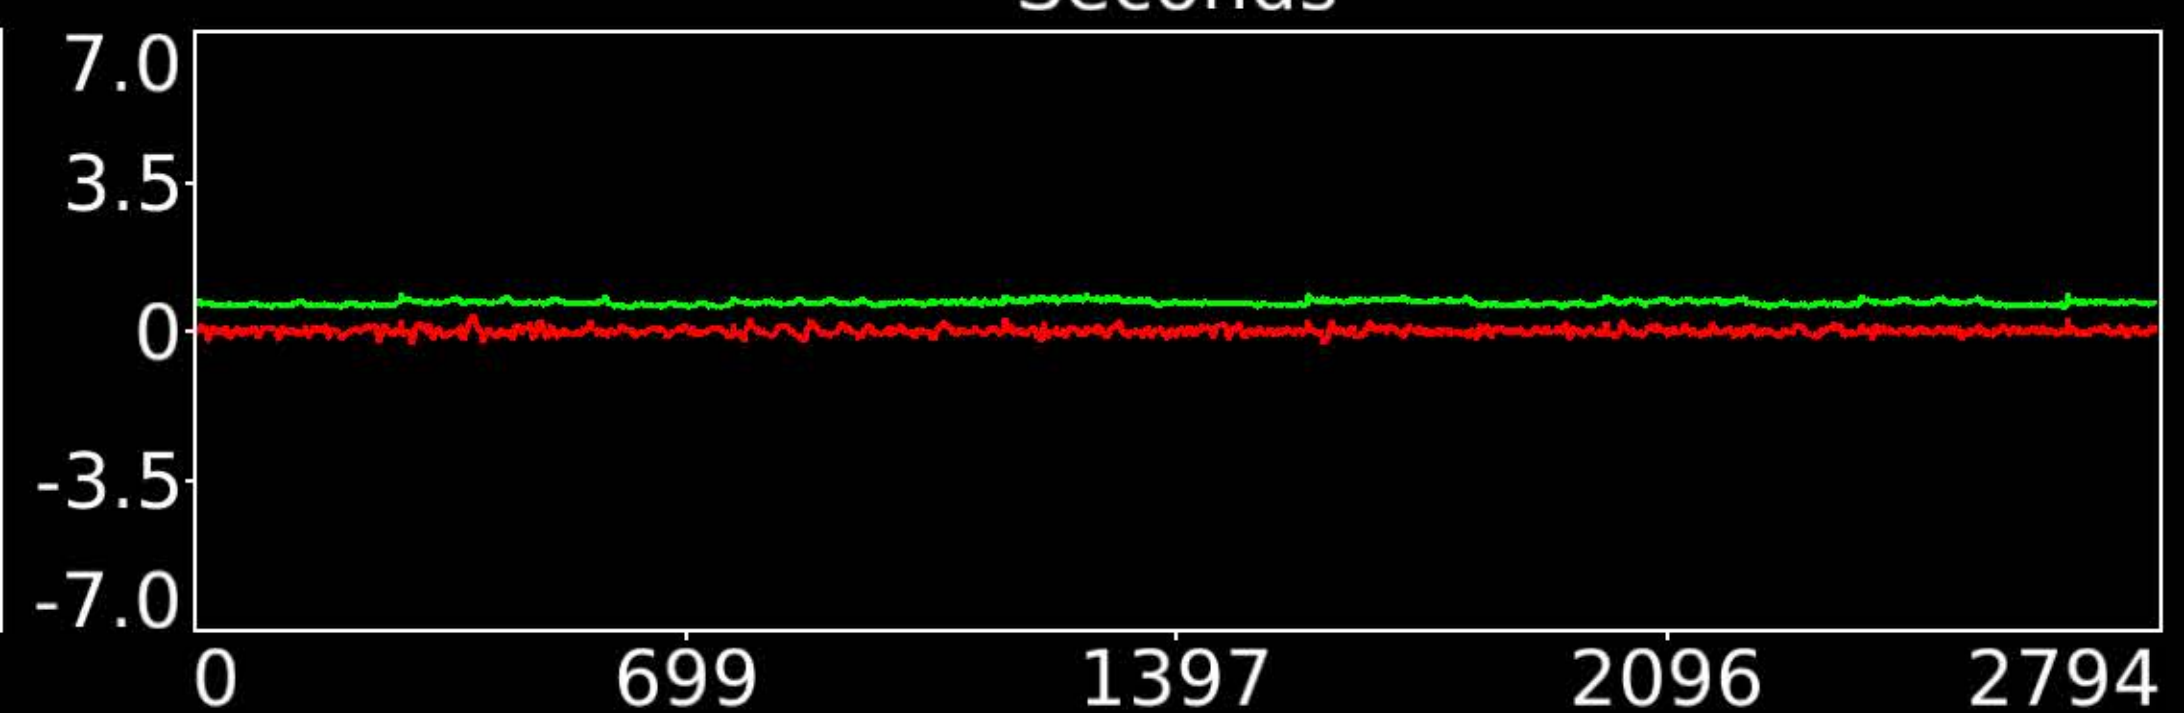

|                                       |                            |                             |  |
|---------------------------------------|----------------------------|-----------------------------|--|
| Number & Class: 50 Noise              |                            | Name: Coil                  |  |
| RVT Correlated: No                    | DVARS Dip Associated: Yes  | Cross-Subject Variable: Yes |  |
| Single Subject: No                    | % Variance Explained: 0.77 | Globality Index: 0.8        |  |
| Rest Component: 47                    | Taskr Component: 50        | Task Modulated: No          |  |
| Rationale: Known coil noise component |                            |                             |  |



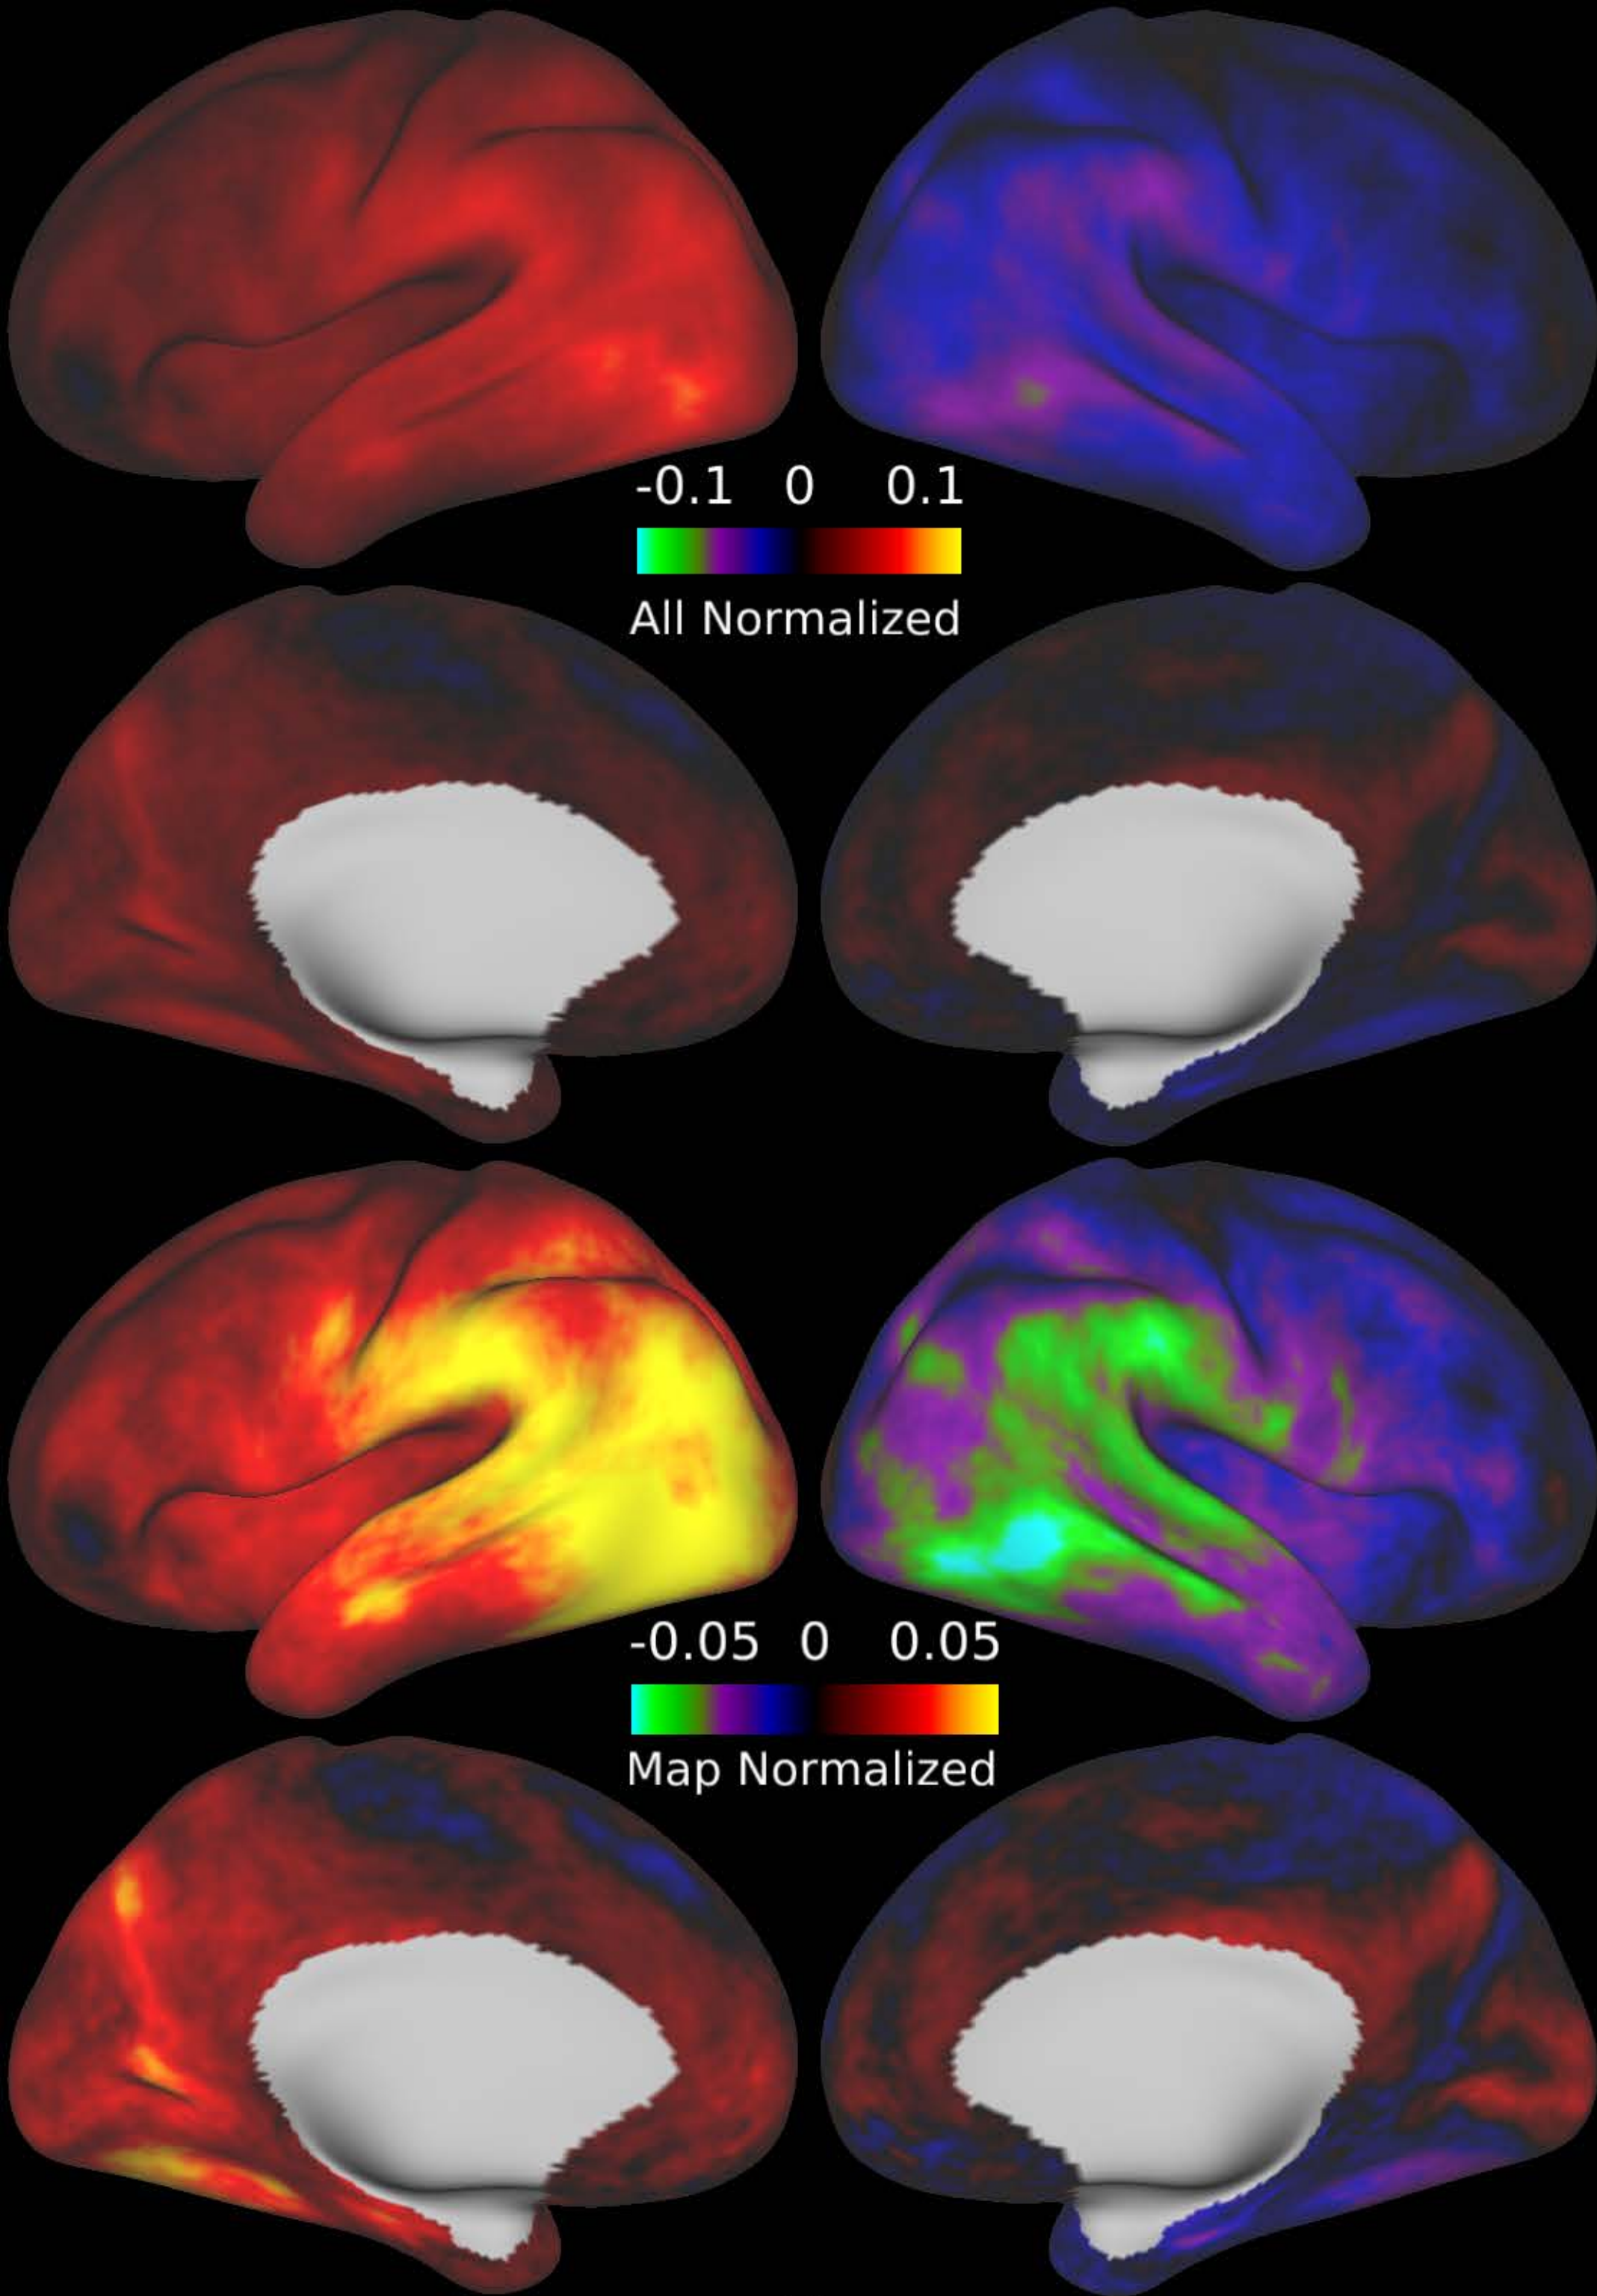

Hertz

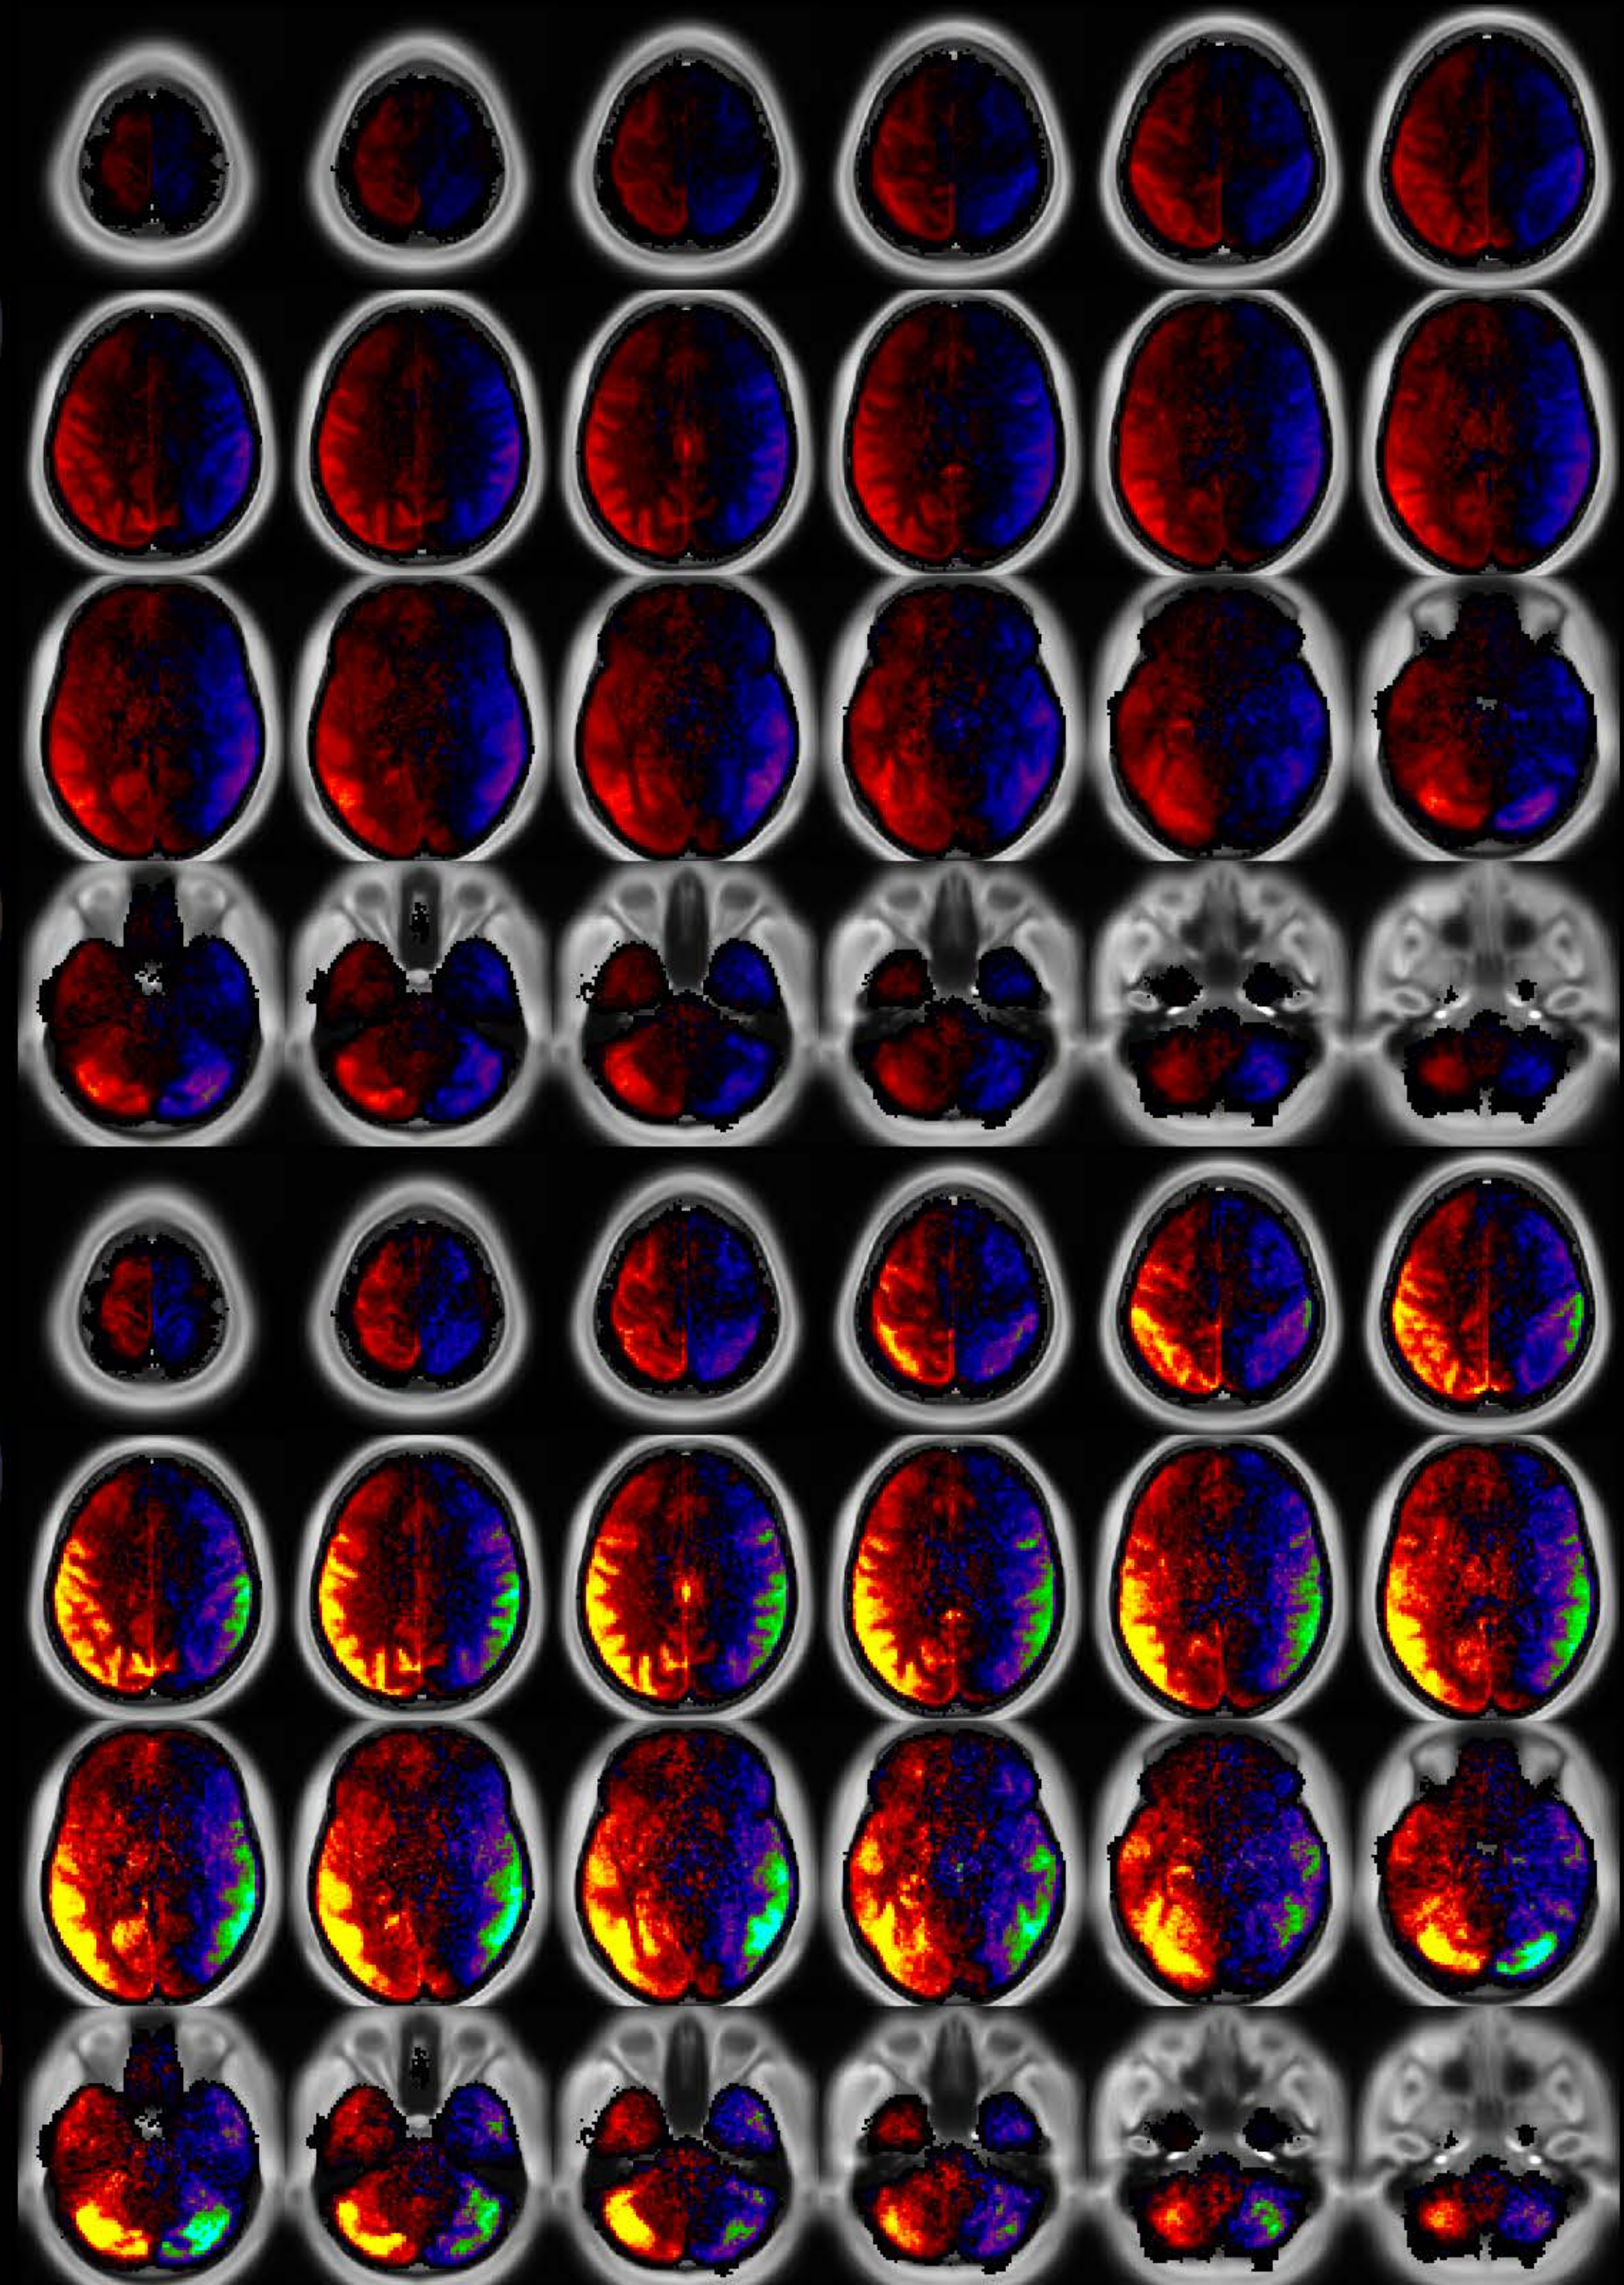

Seconds

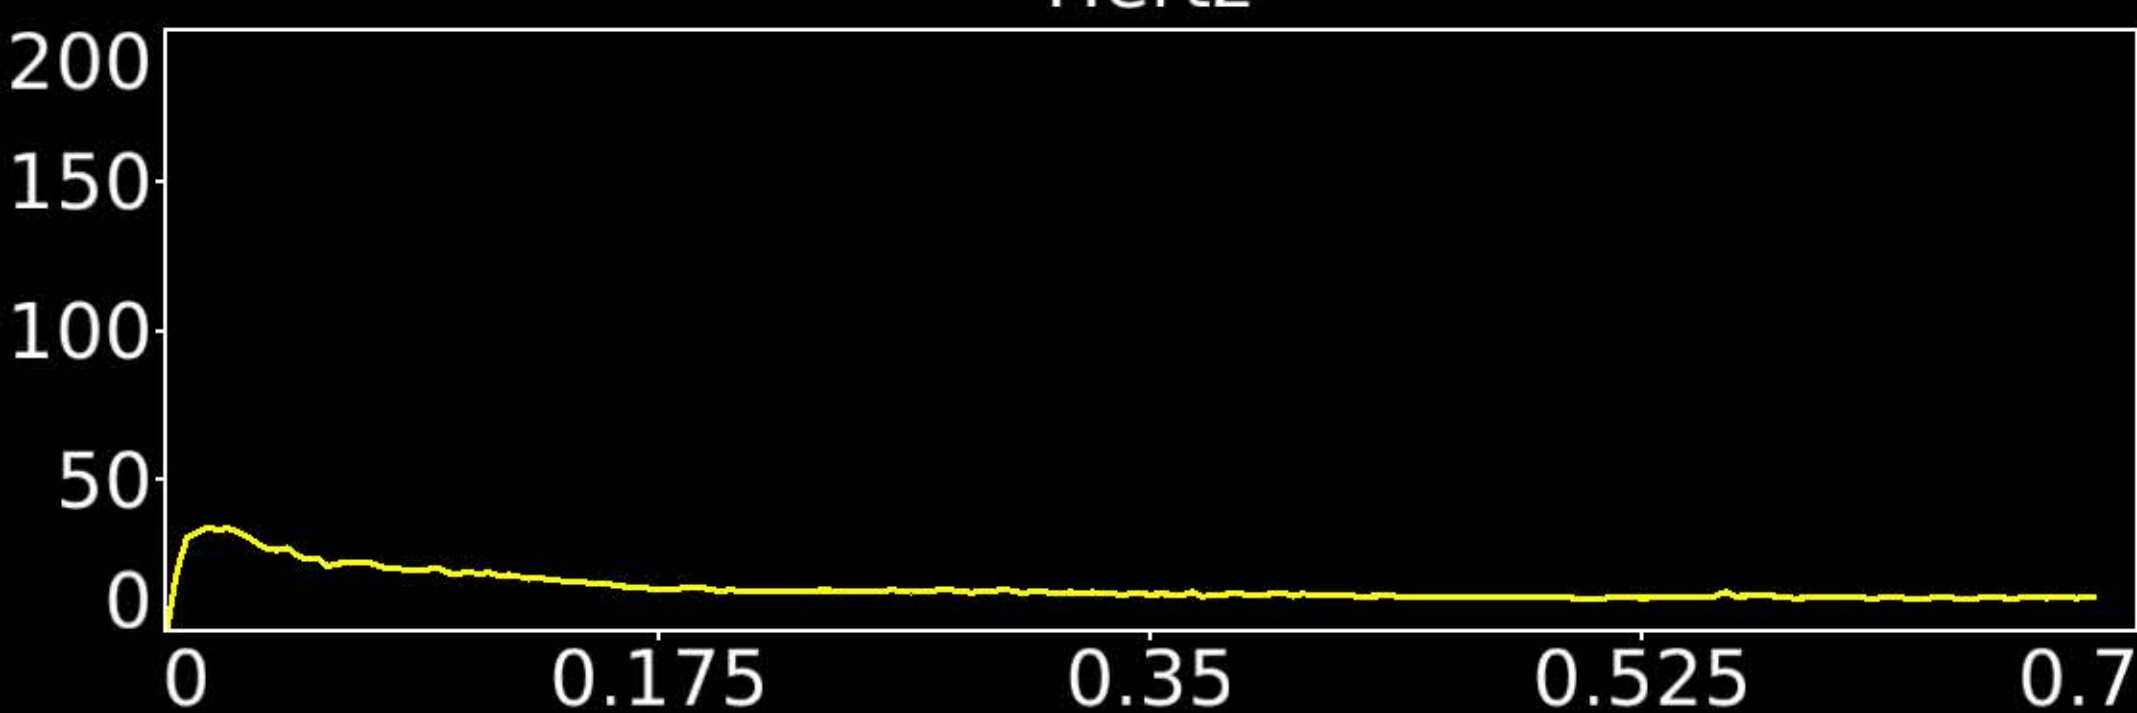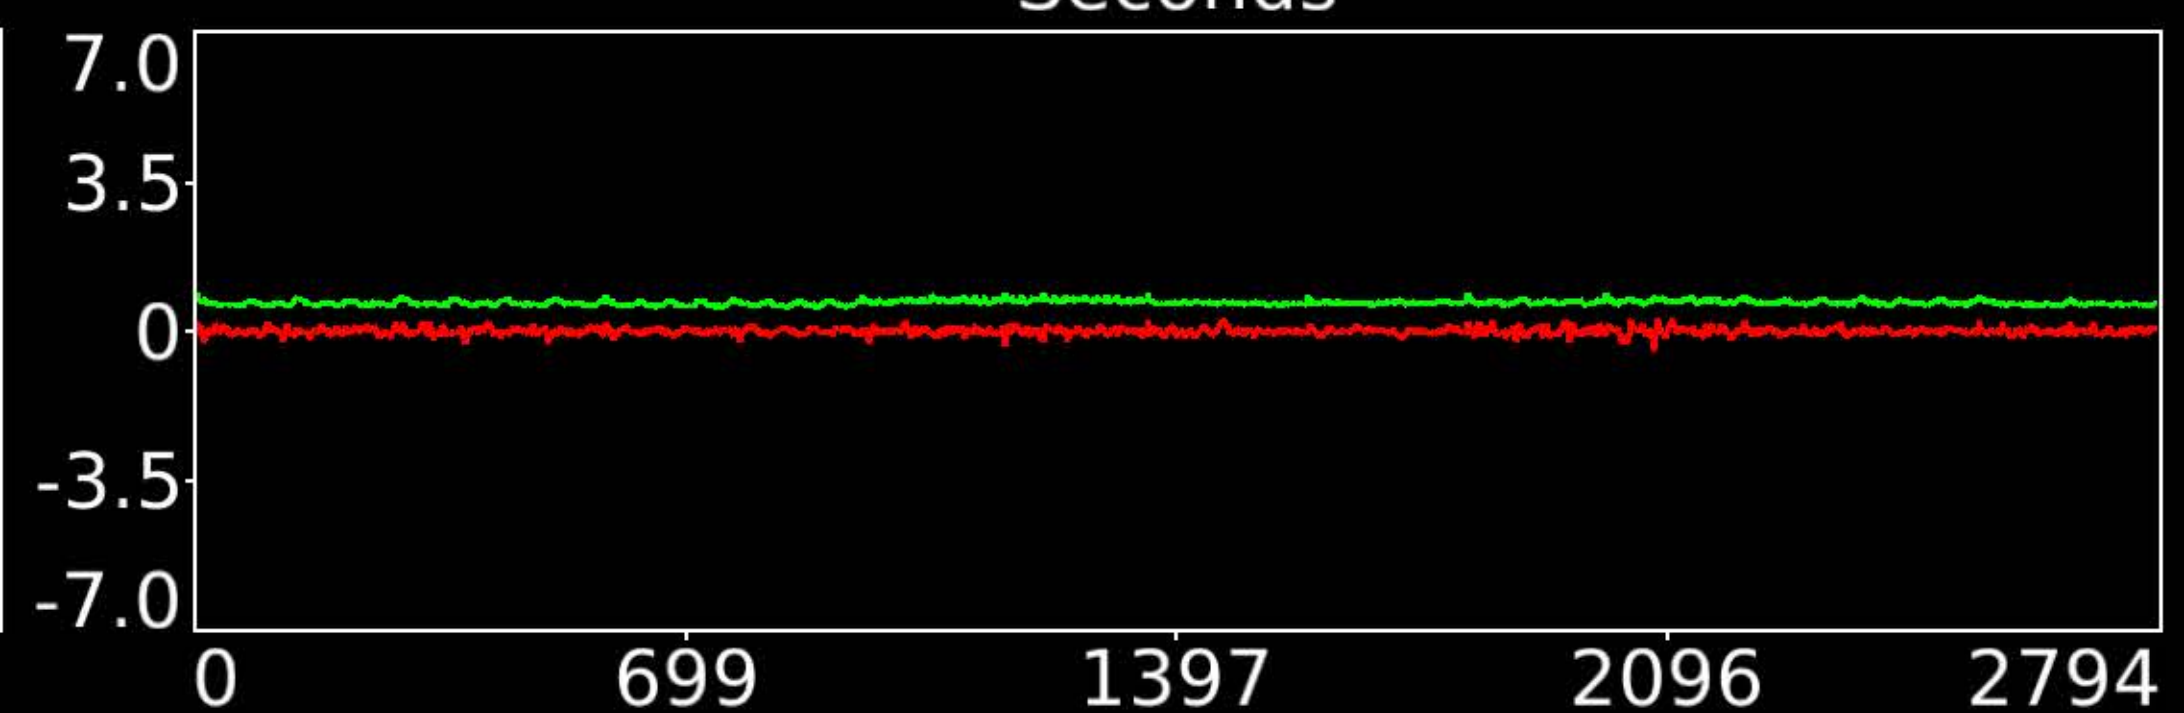

|                                                                                                        |                            |                             |  |
|--------------------------------------------------------------------------------------------------------|----------------------------|-----------------------------|--|
| Number & Class: 51 Noise                                                                               |                            | Name: L>R Movement Artifact |  |
| RVT Correlated: No                                                                                     | DVARS Dip Associated: Yes  | Cross-Subject Variable: No  |  |
| Single Subject: No                                                                                     | % Variance Explained: 0.75 | Globality Index: 0.5        |  |
| Rest Component: 50                                                                                     | Taskr Component: 37        | Task Modulated: No          |  |
| Rationale: Highly DVARS Dips associated component; looks like movement regressor beta map (Z rotation) |                            |                             |  |



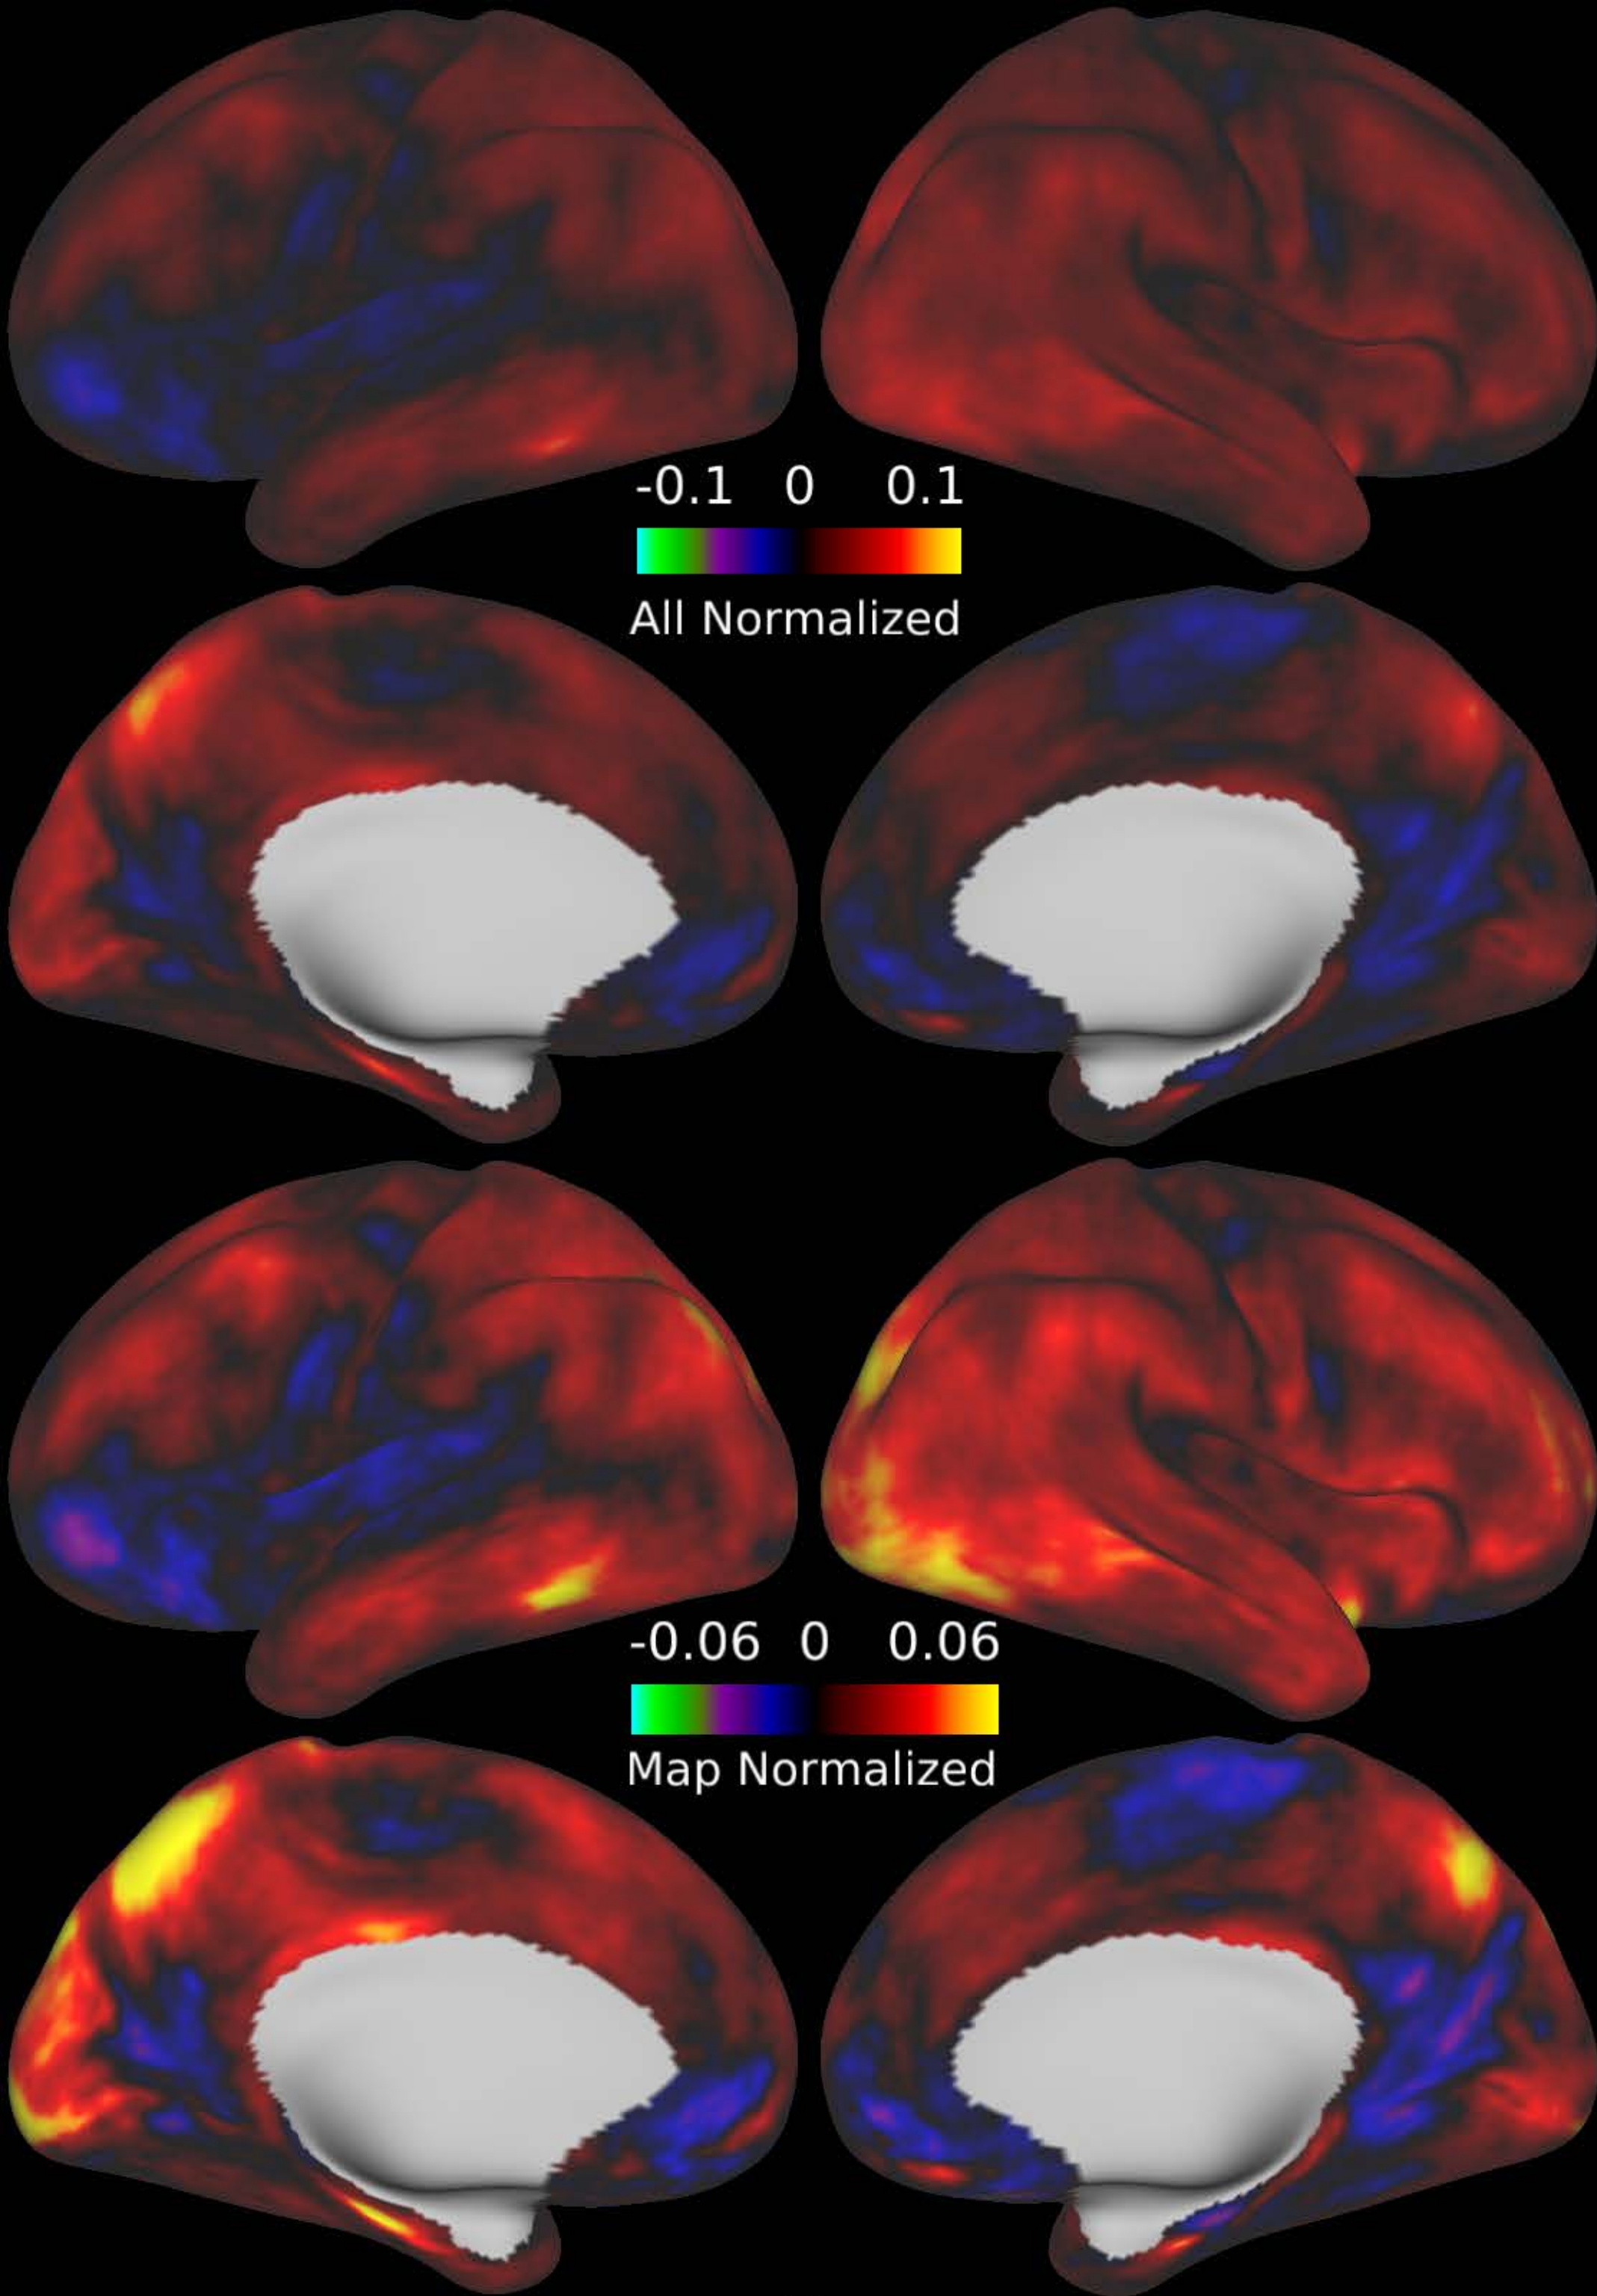

Hertz

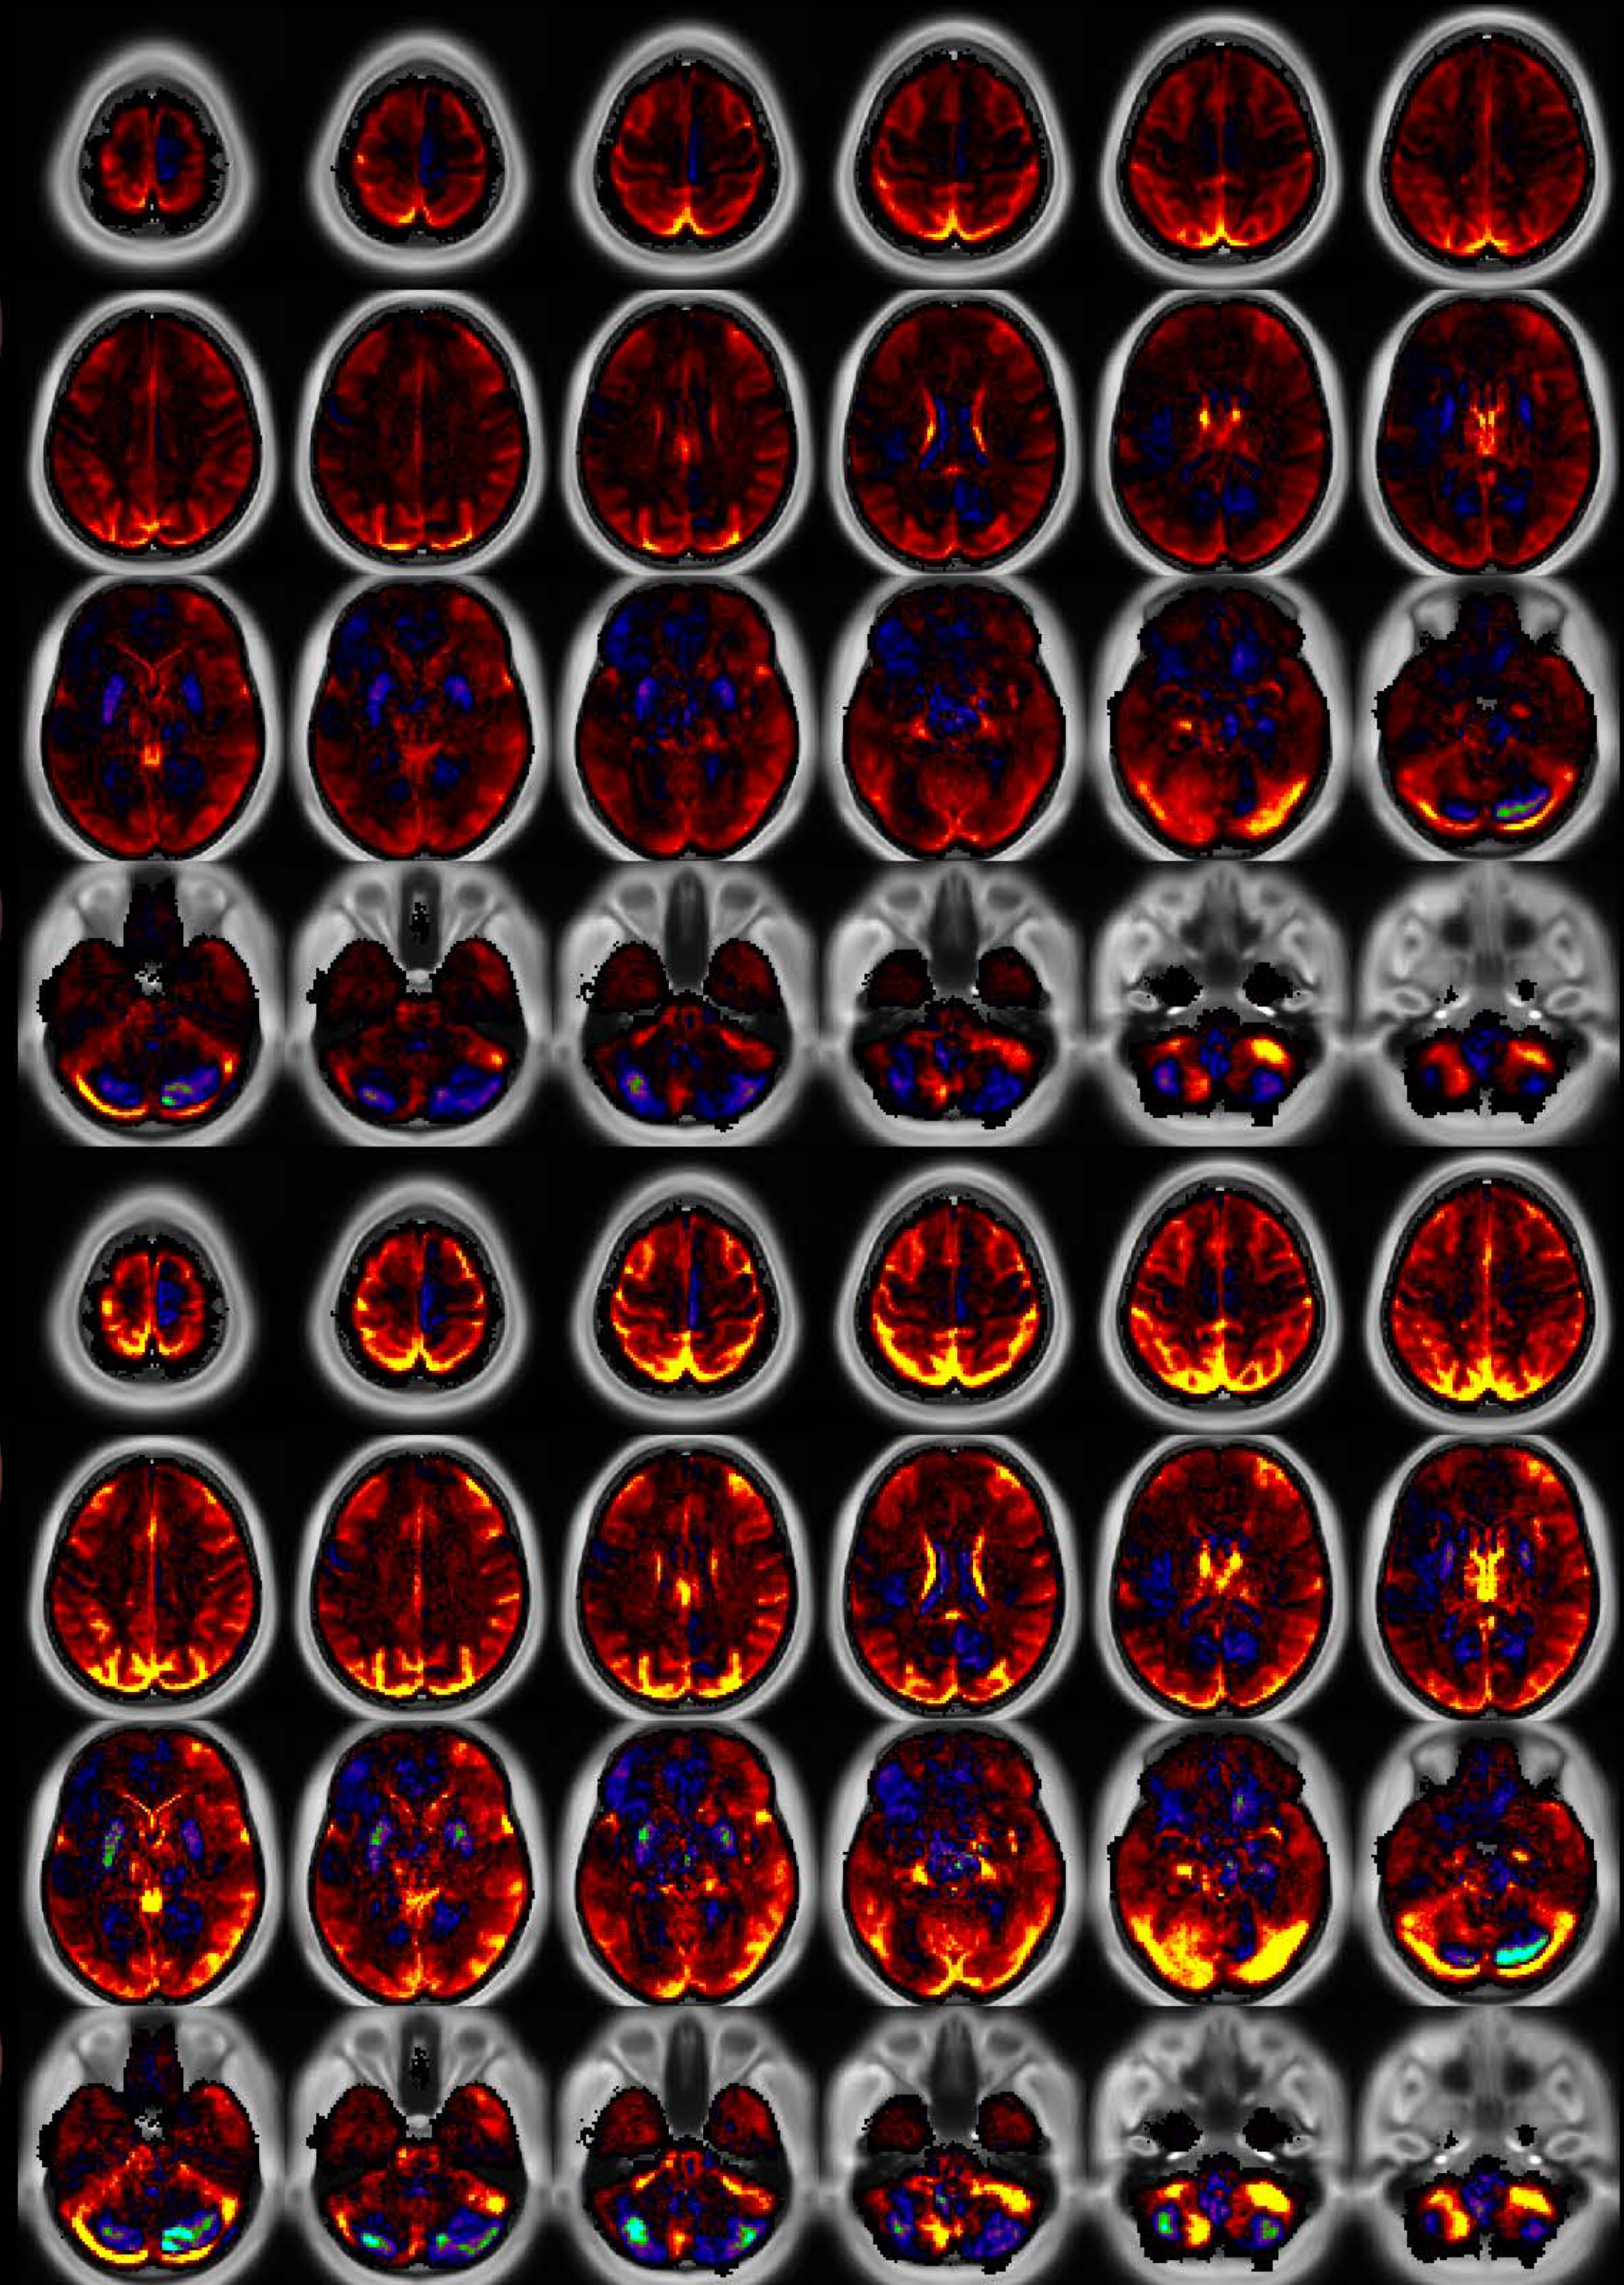

Seconds

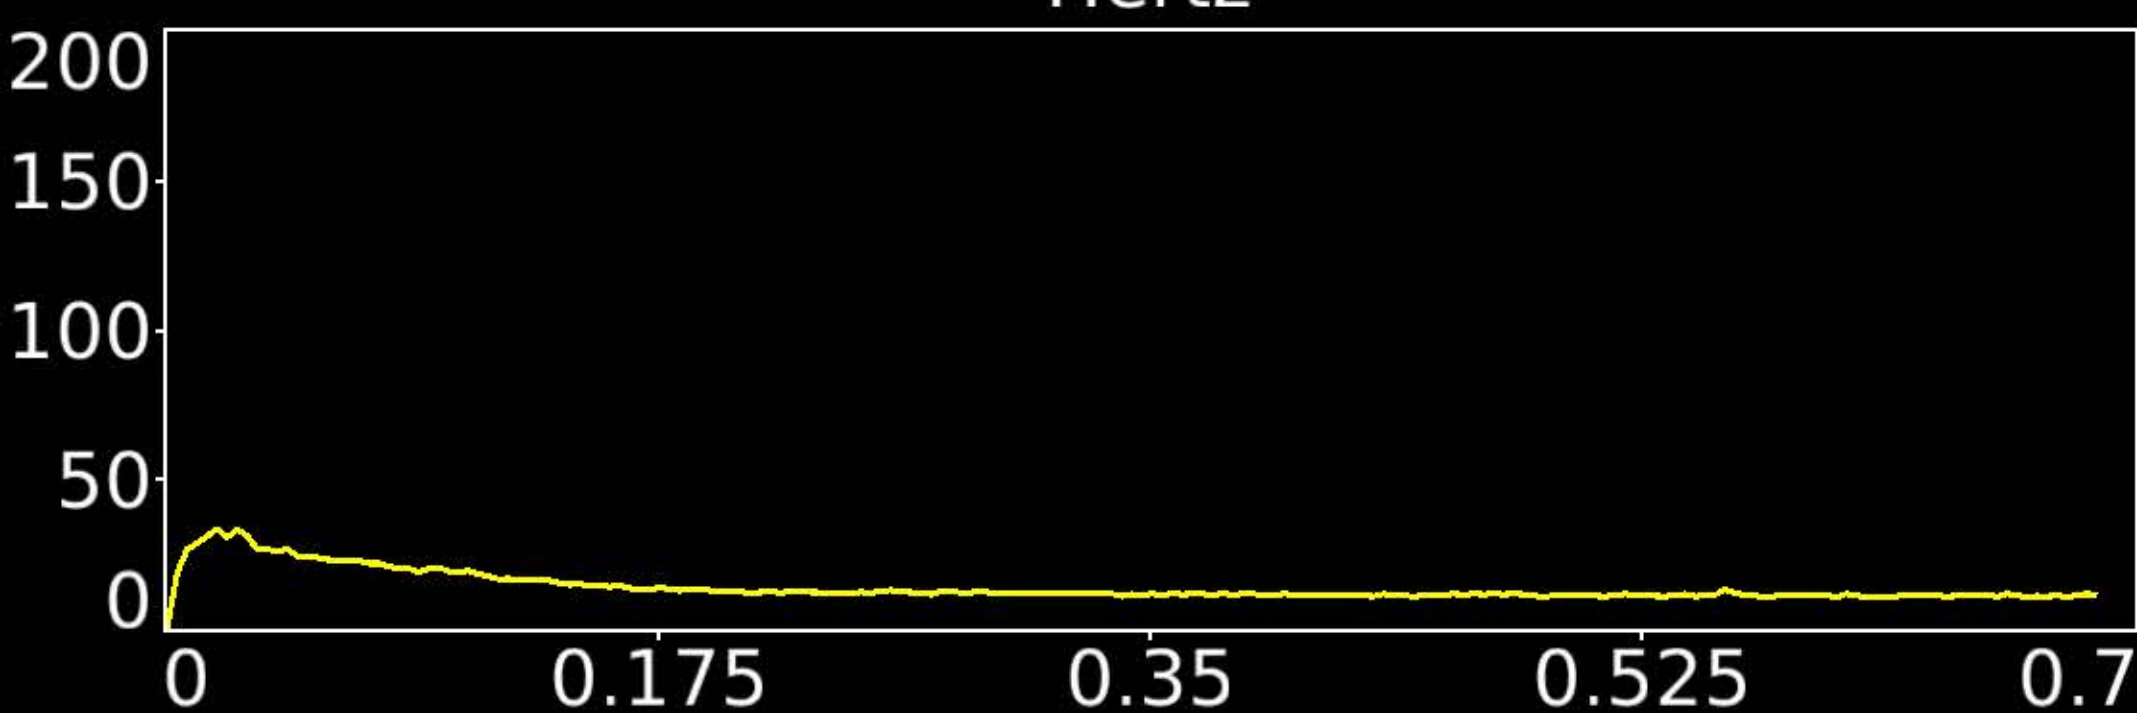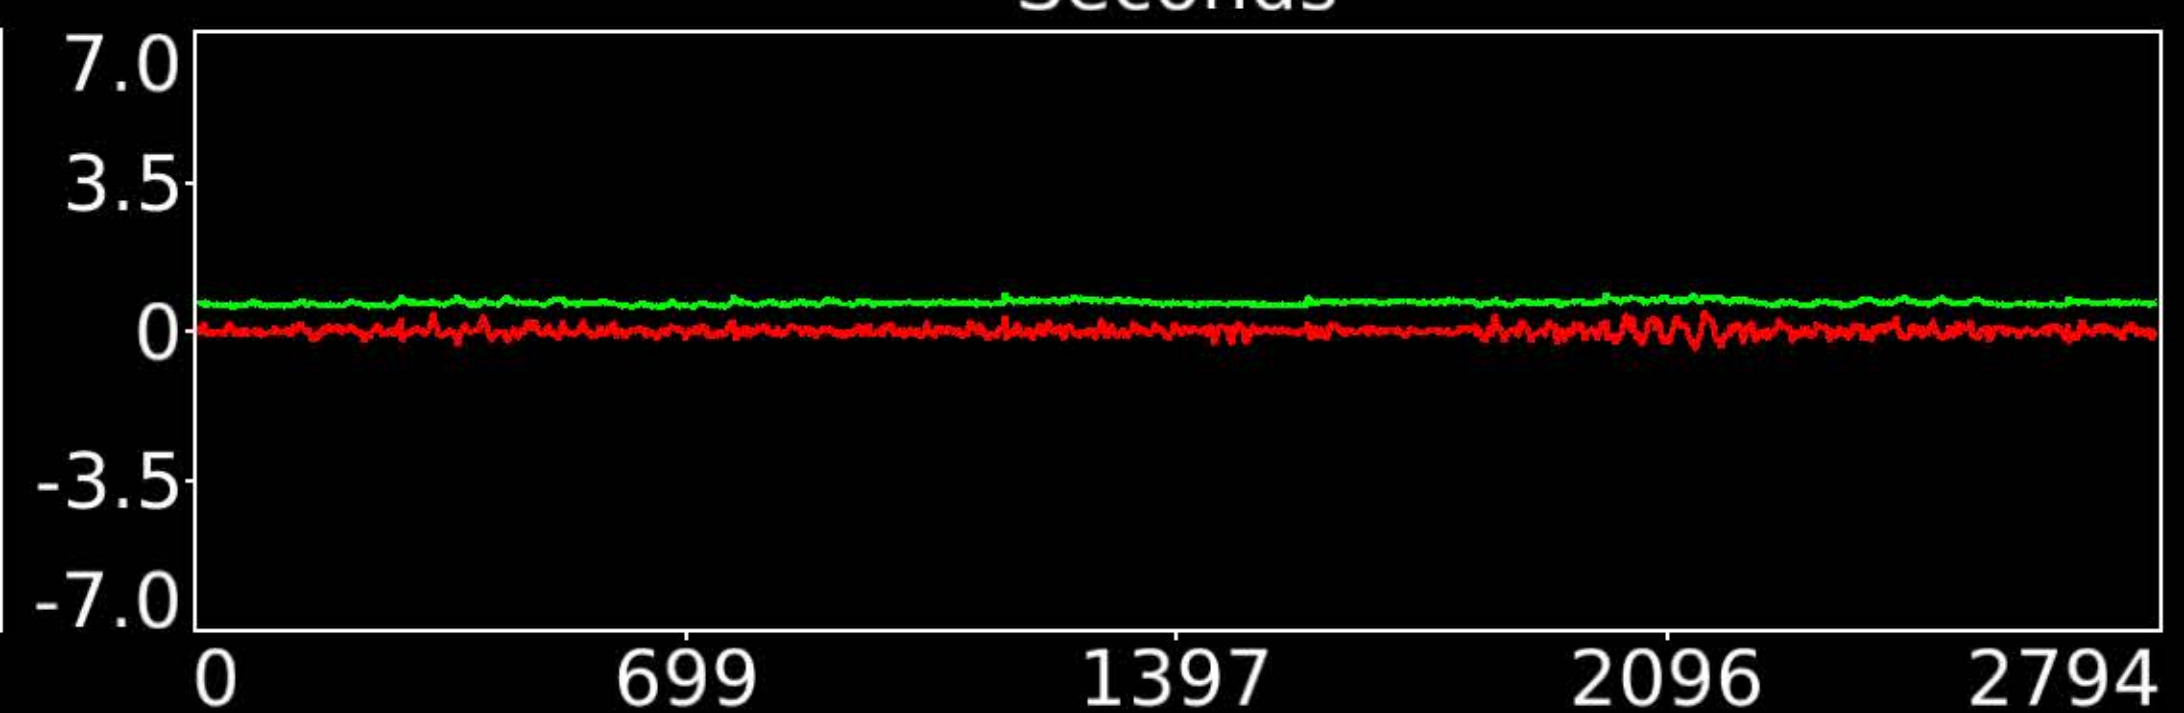

Number & Class: 52 Noise

Name: Global Physiological Noise

RVT Correlated: No

DVARS Dip Associated: No

Cross-Subject Variable: No

Single Subject: No

% Variance Explained: 0.75

Globality Index: 1.59

Rest Component: No

Taskr Component: No

Task Modulated: No

Rationale: Globally positive component without positive and negative patches that respect known RSNs or areas; some white matter signal



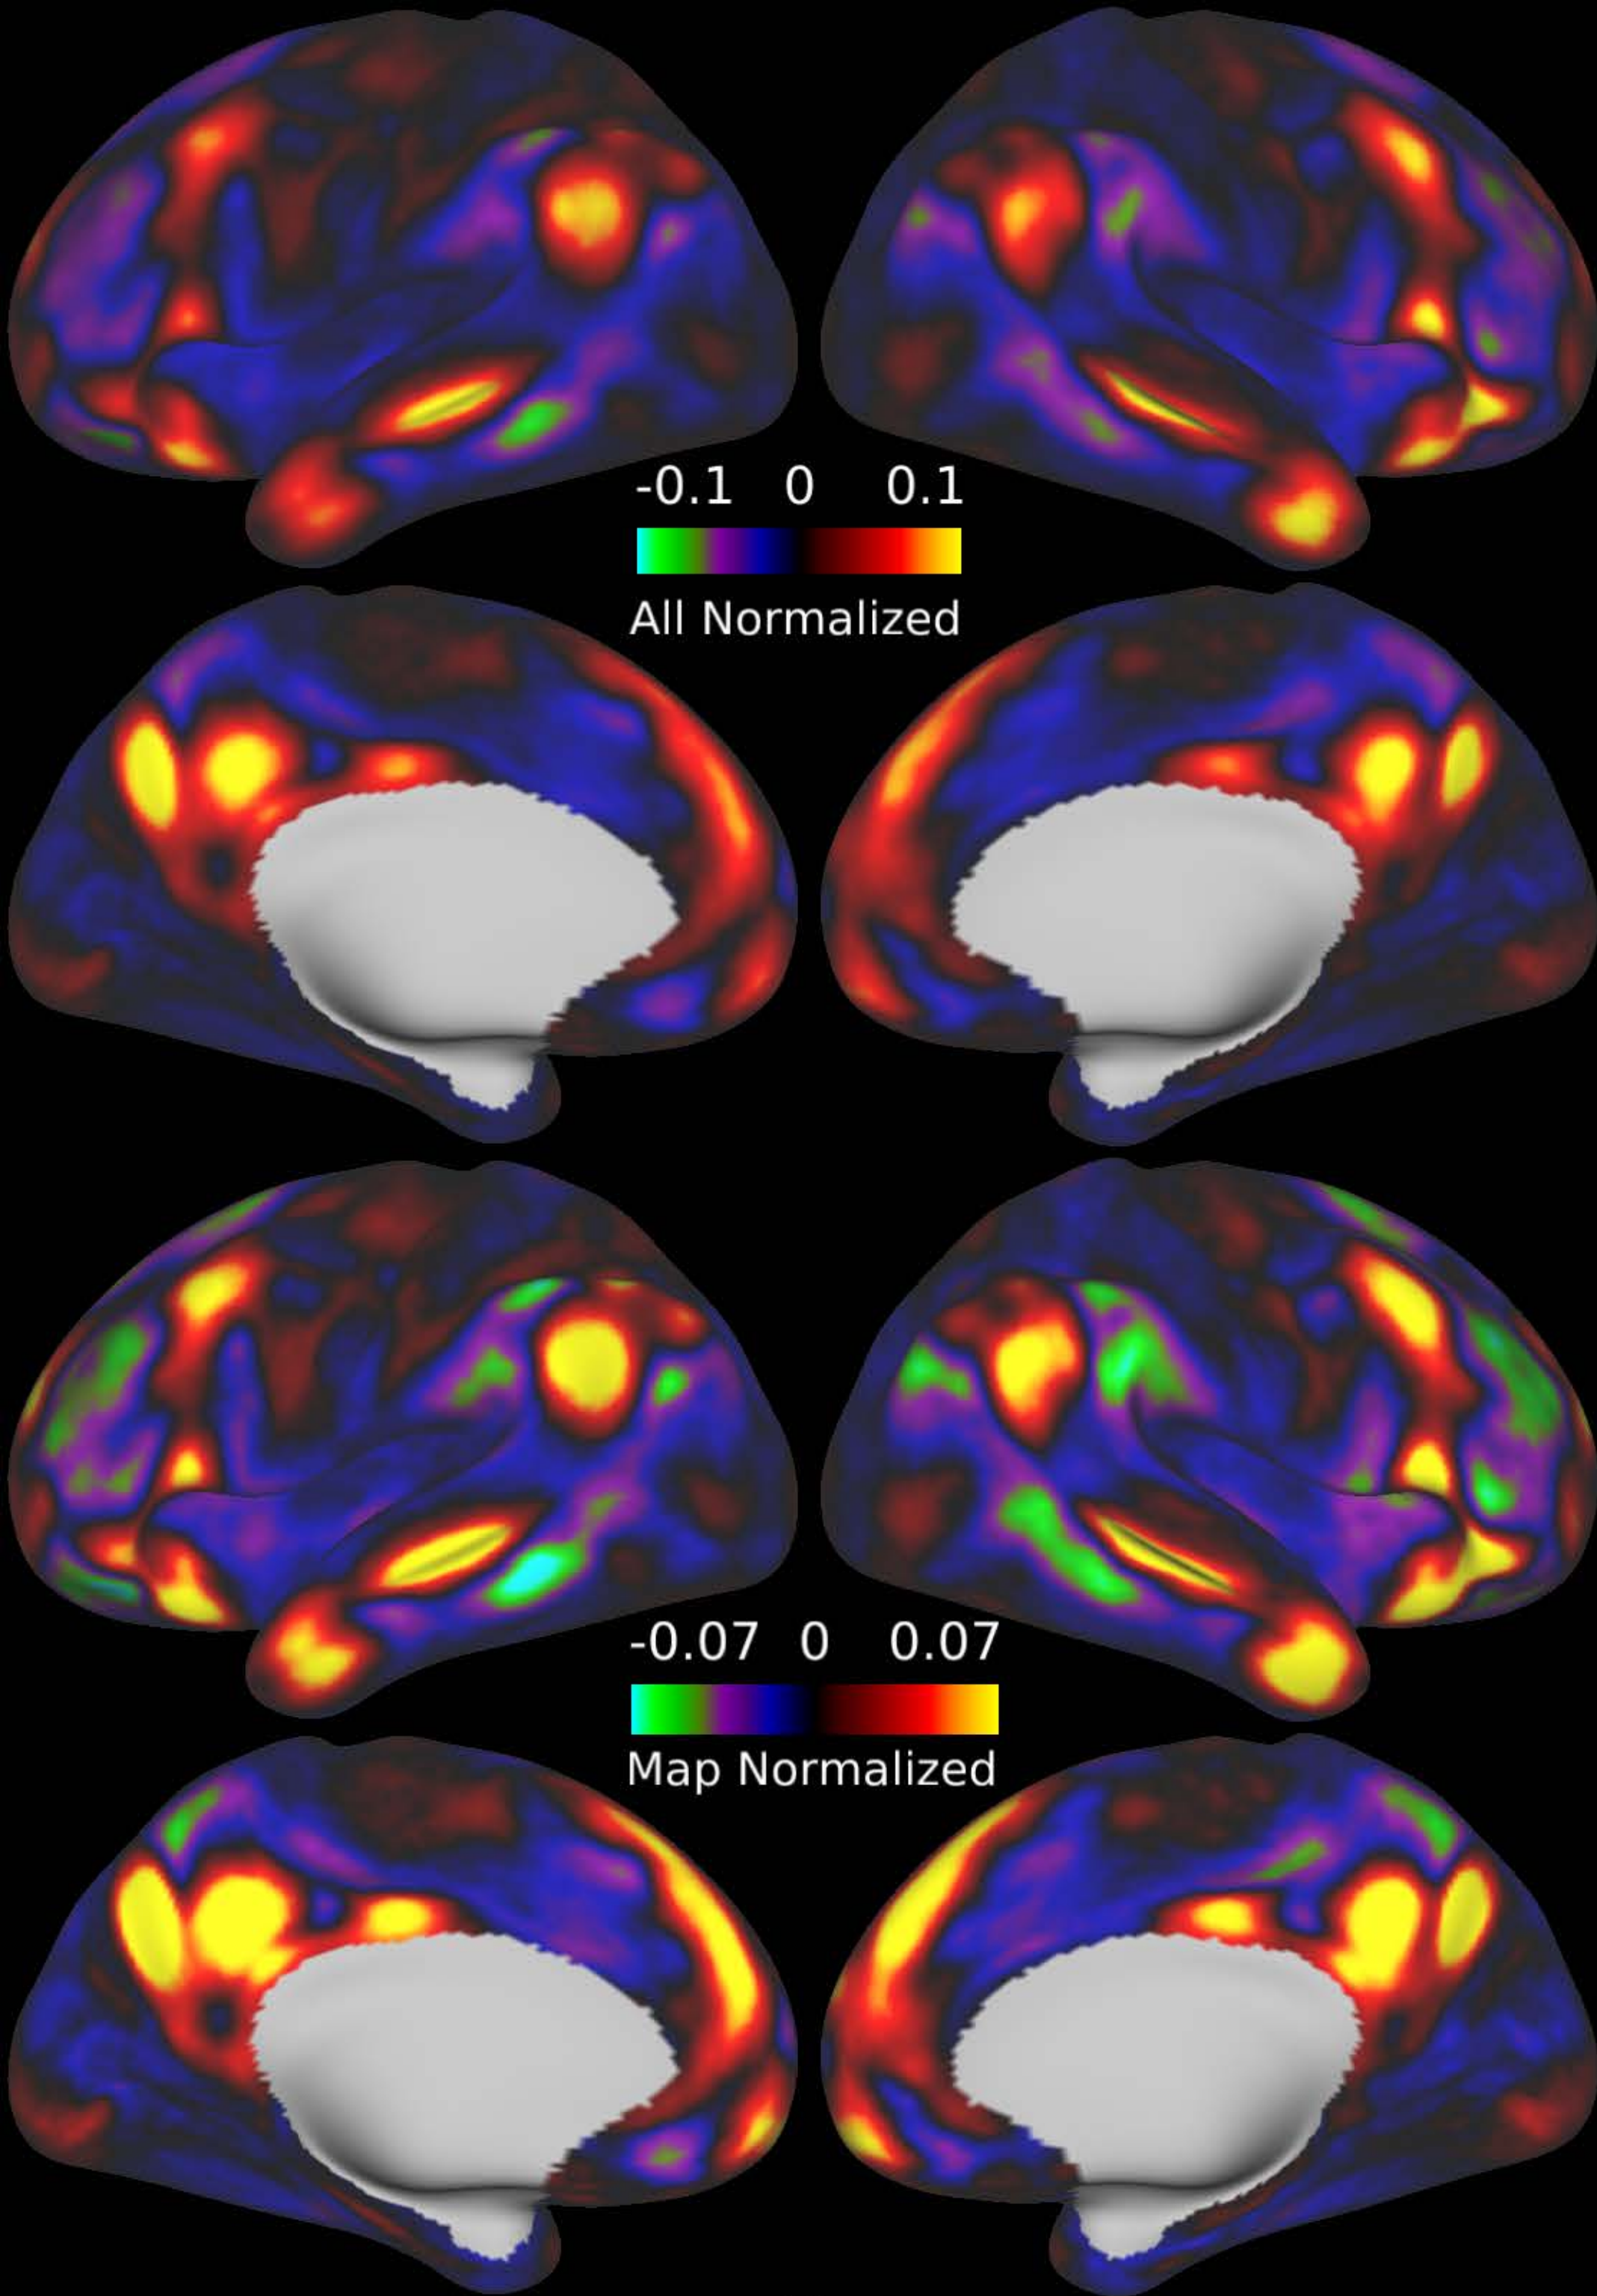

Hertz

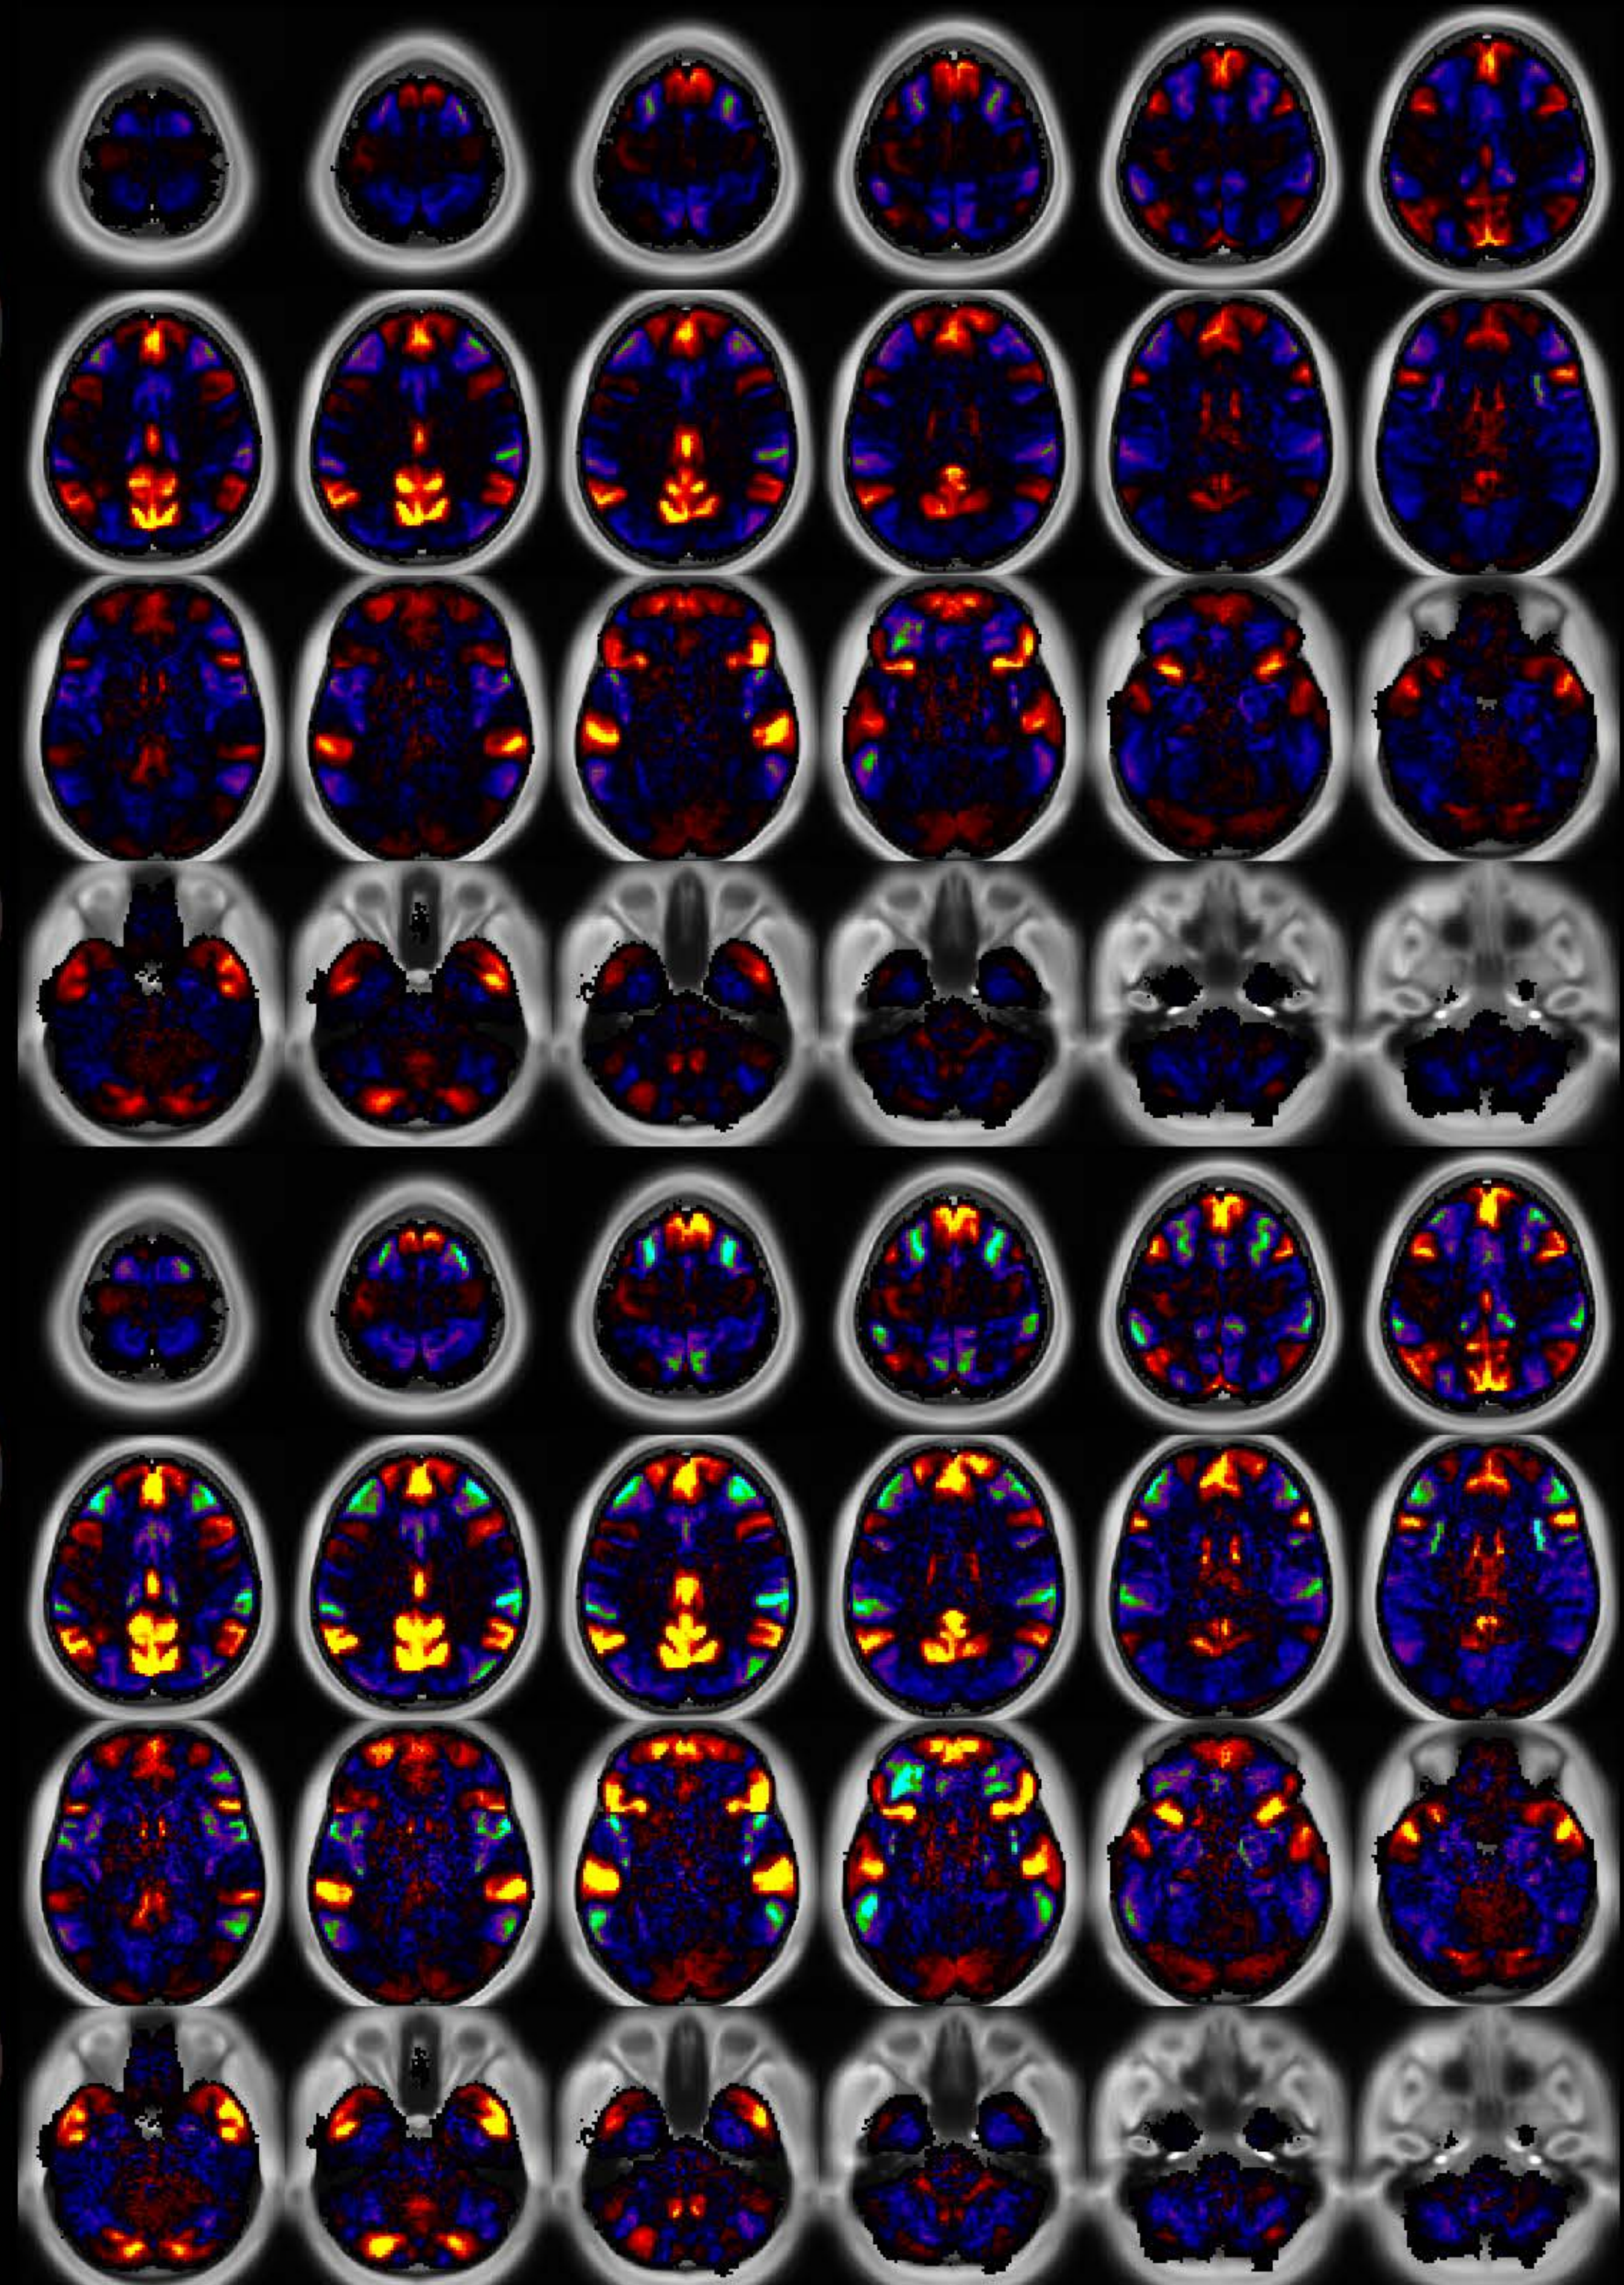

Seconds

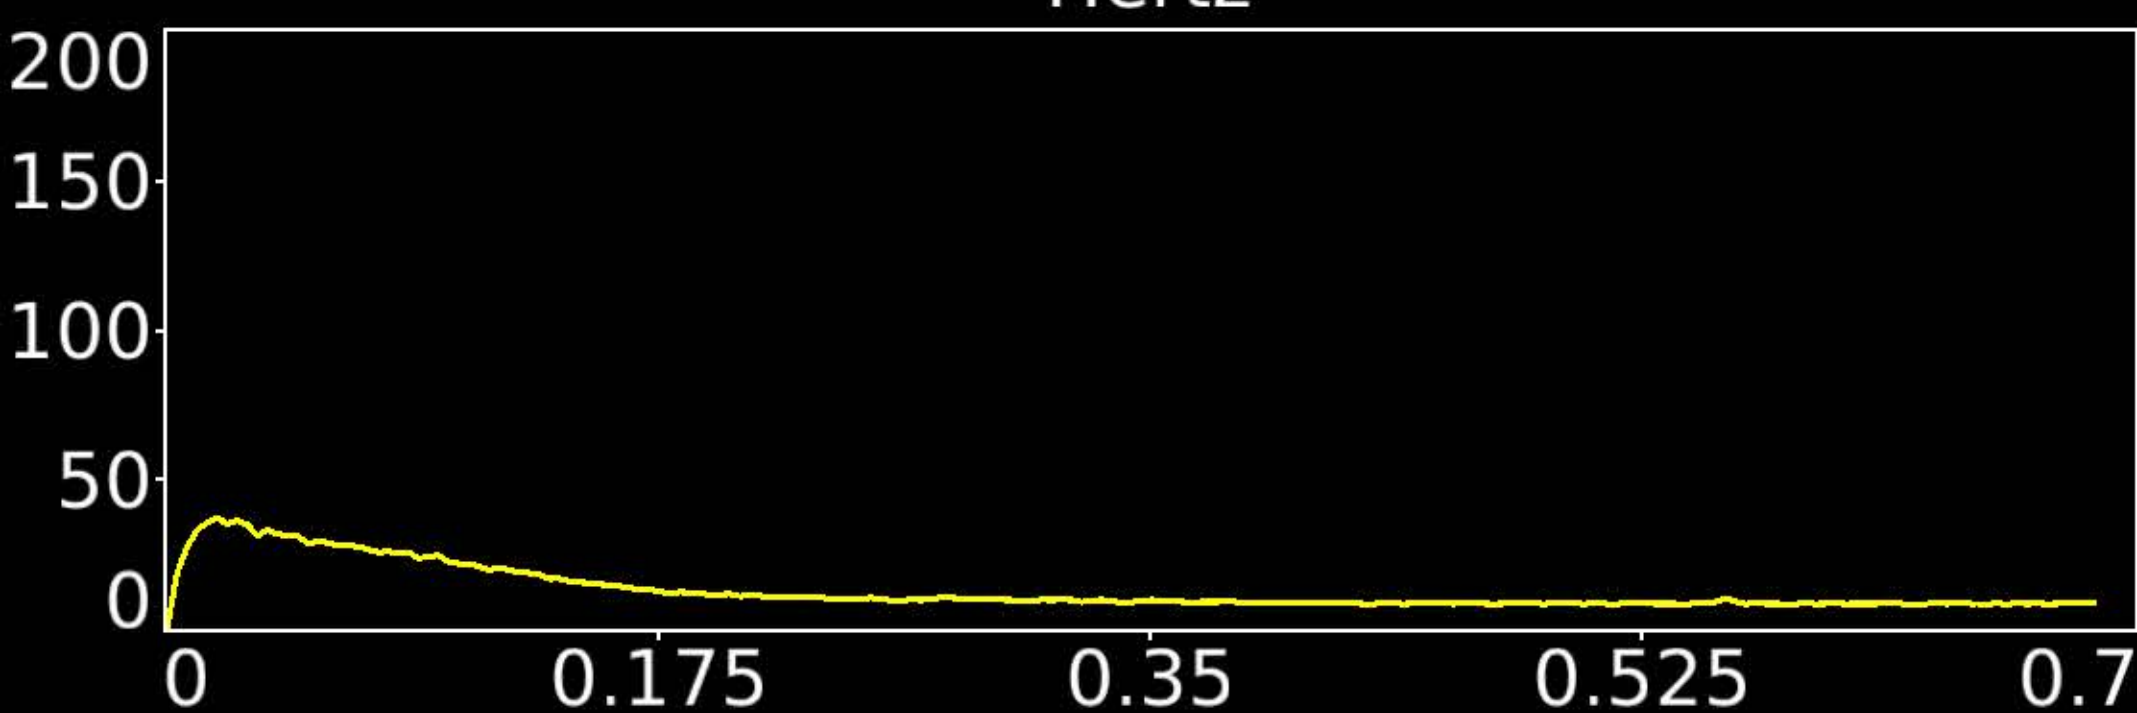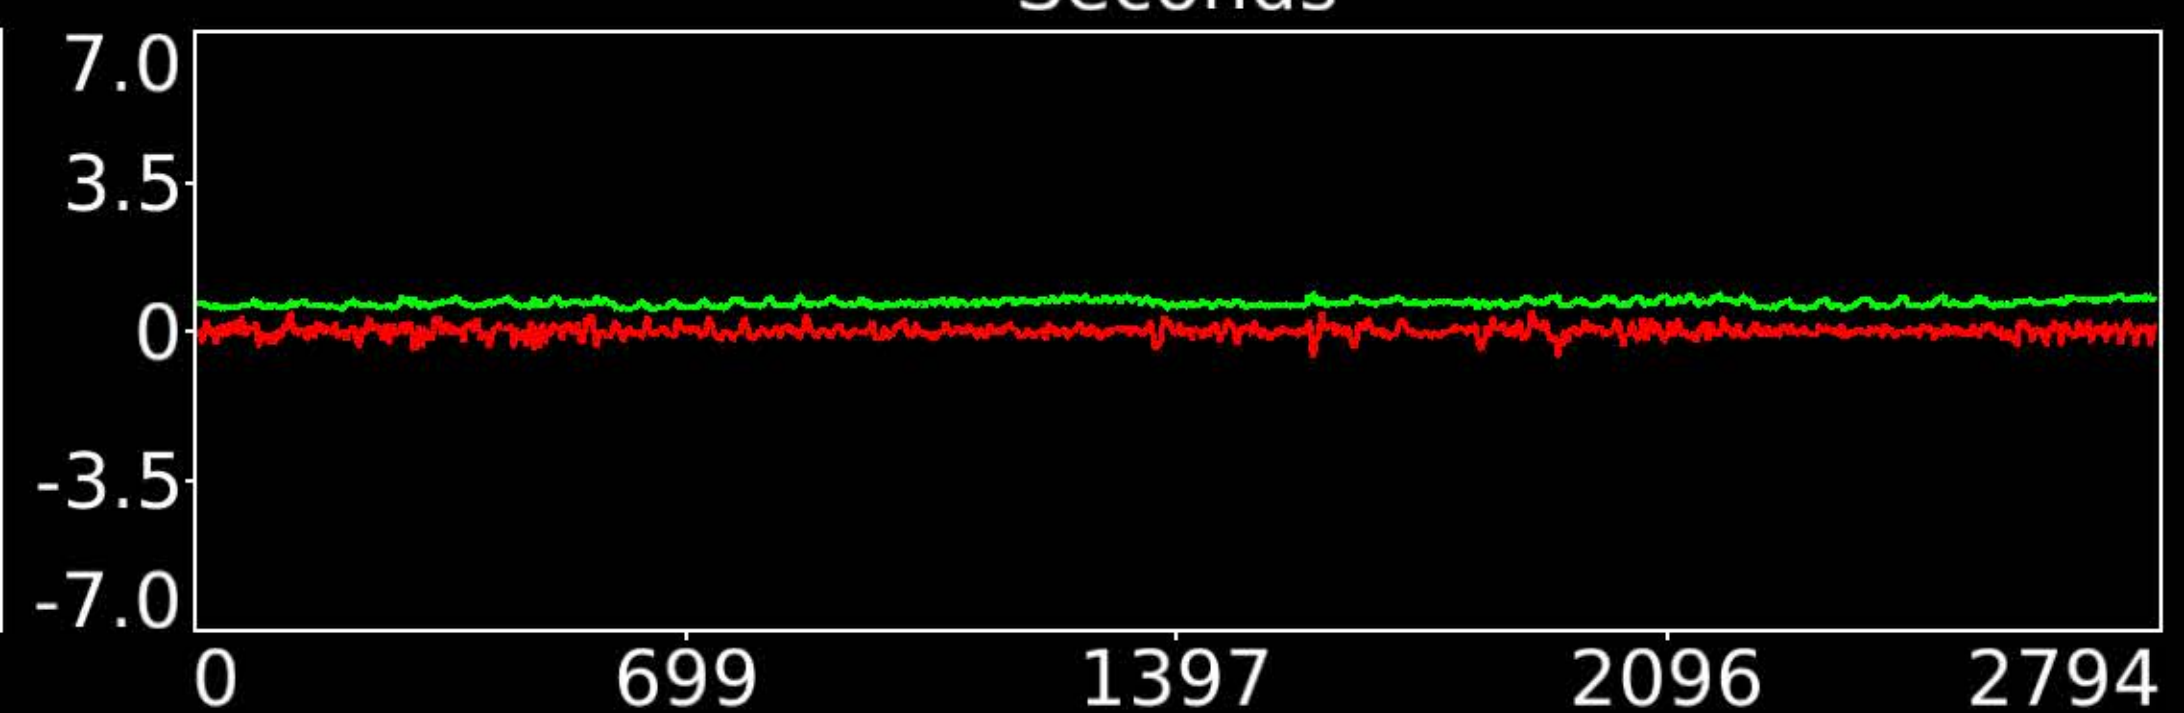

|                                                                                                                   |                            |                            |  |
|-------------------------------------------------------------------------------------------------------------------|----------------------------|----------------------------|--|
| Number & Class: 53 Signal                                                                                         |                            | Name: Unknown Network      |  |
| RVT Correlated: No                                                                                                | DVARS Dip Associated: No   | Cross-Subject Variable: No |  |
| Single Subject: No                                                                                                | % Variance Explained: 0.74 | Globality Index: 0.61      |  |
| Rest Component: No                                                                                                | Taskr Component: No        | Task Modulated: No         |  |
| Rationale: Spatial map includes positive and negative patches that respect known RSNs (e.g. Default Mode Network) |                            |                            |  |



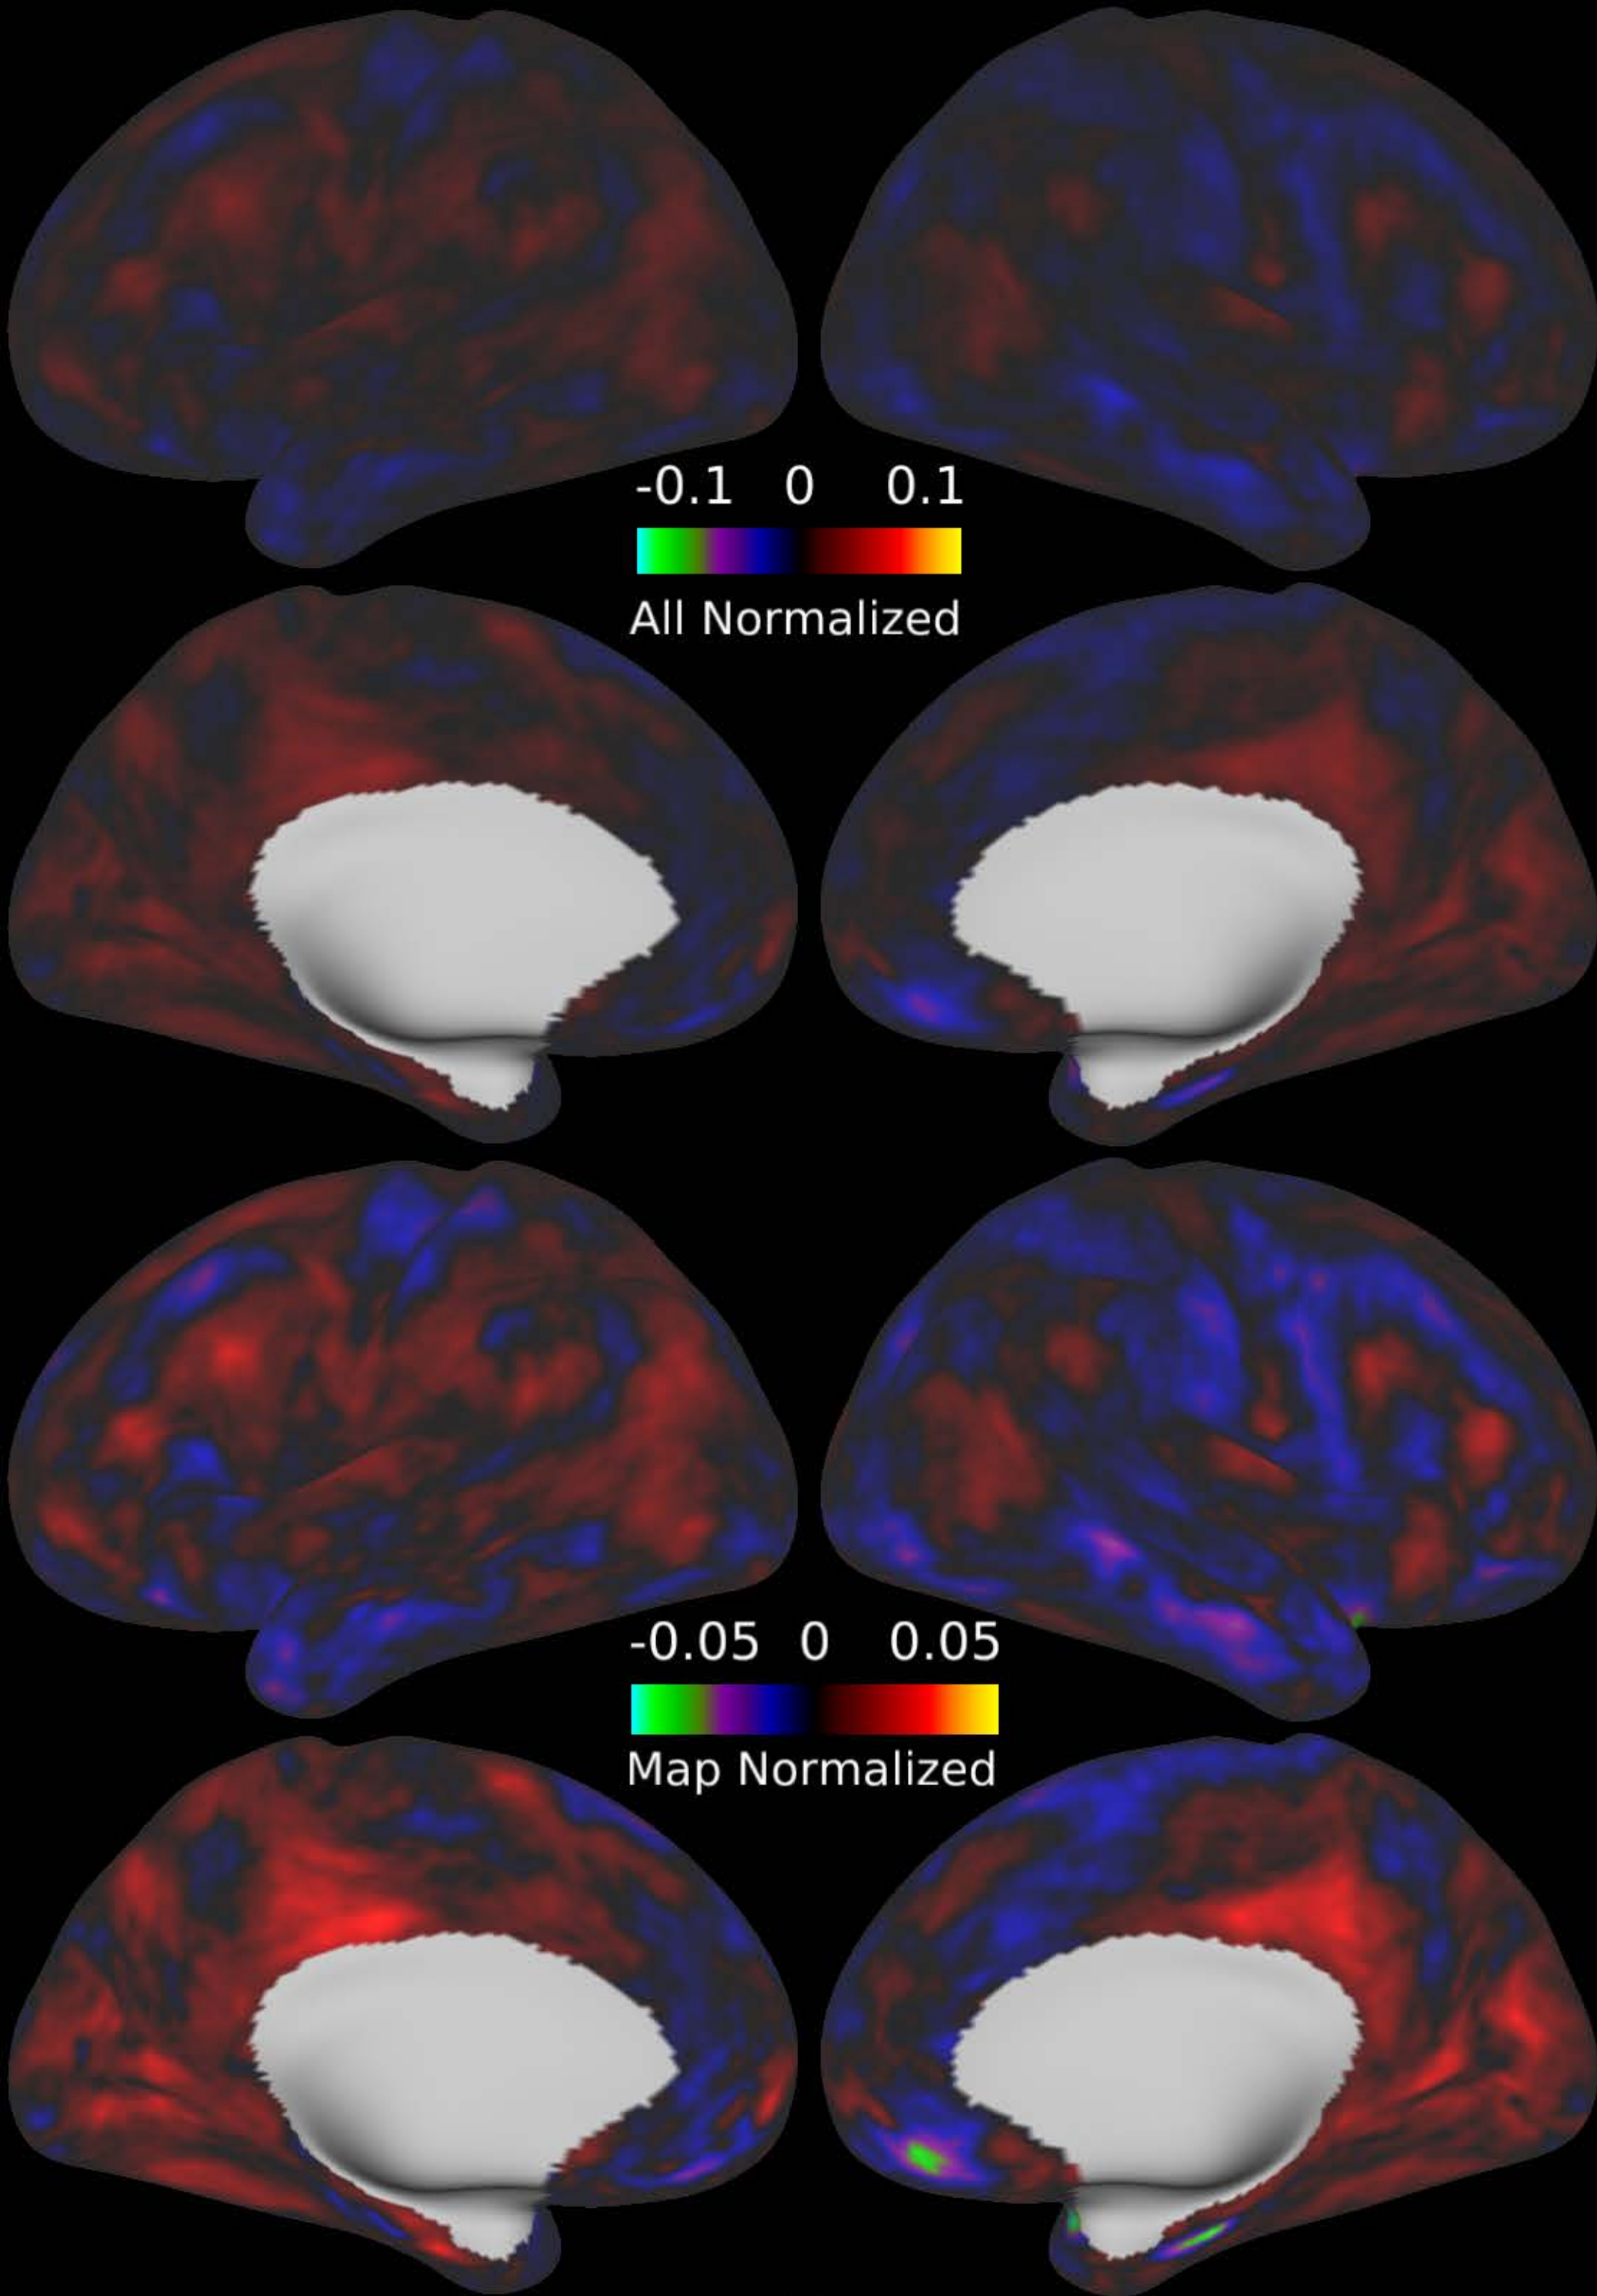

Hertz

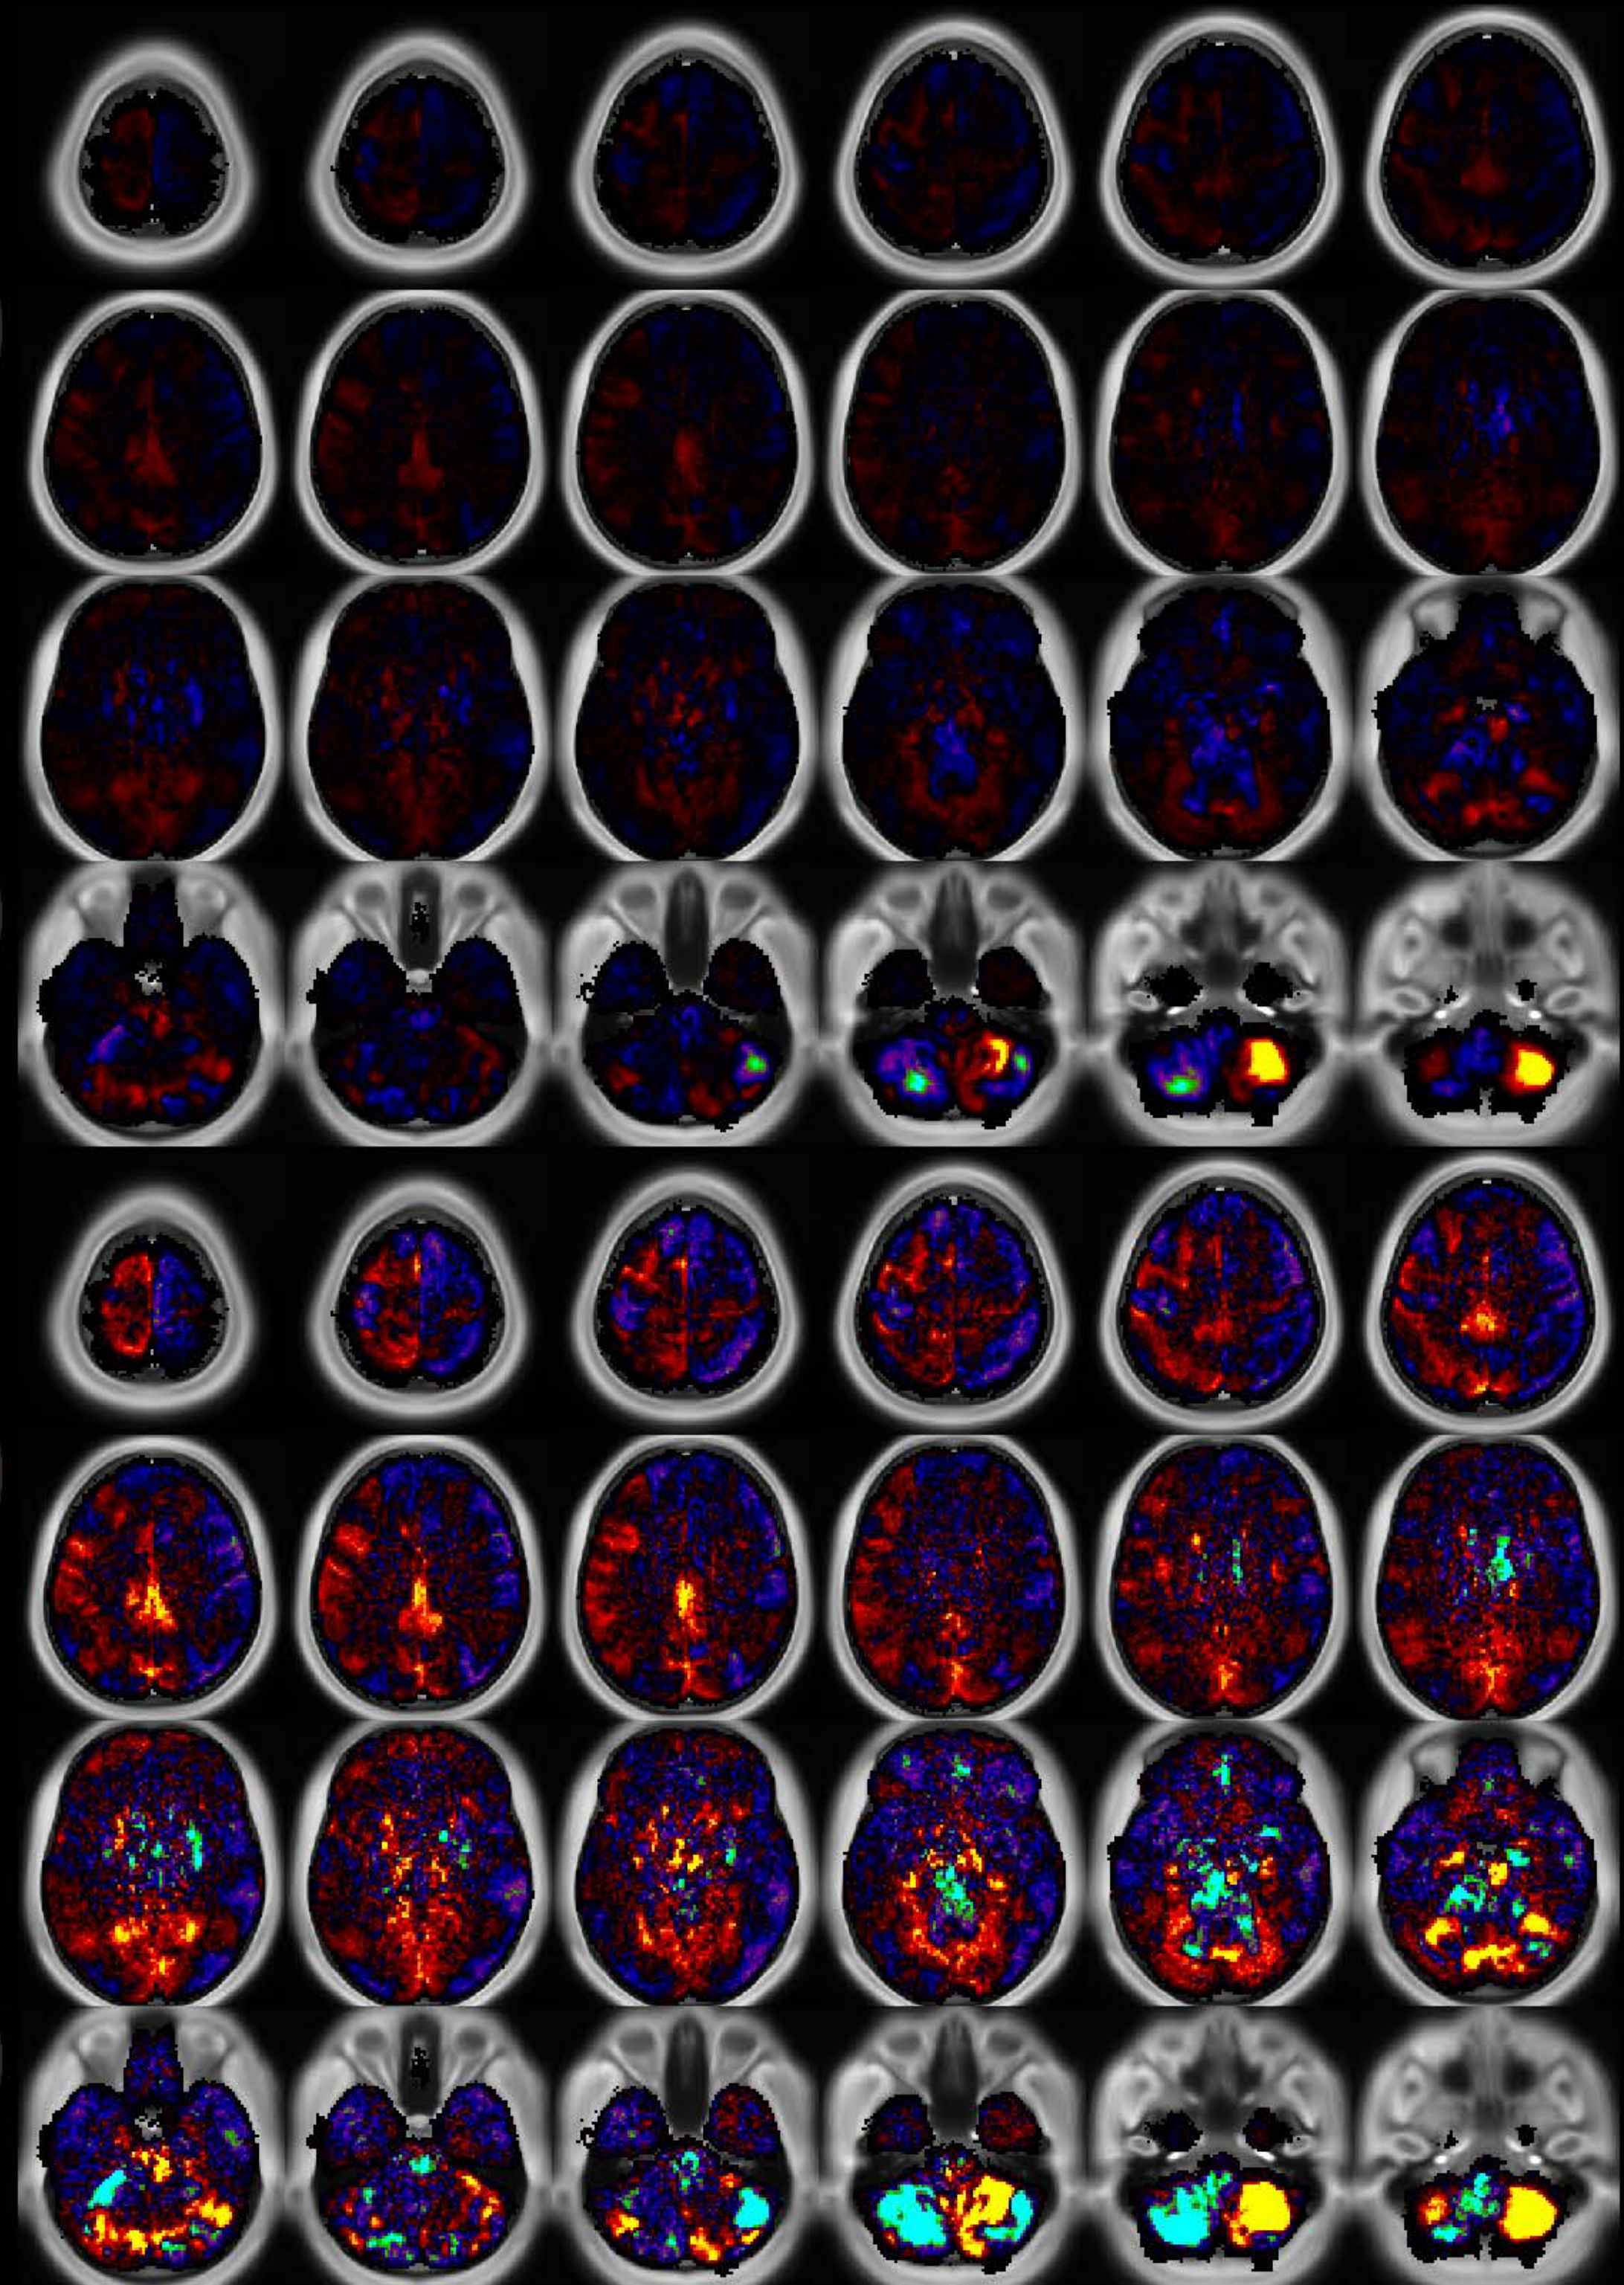

Seconds

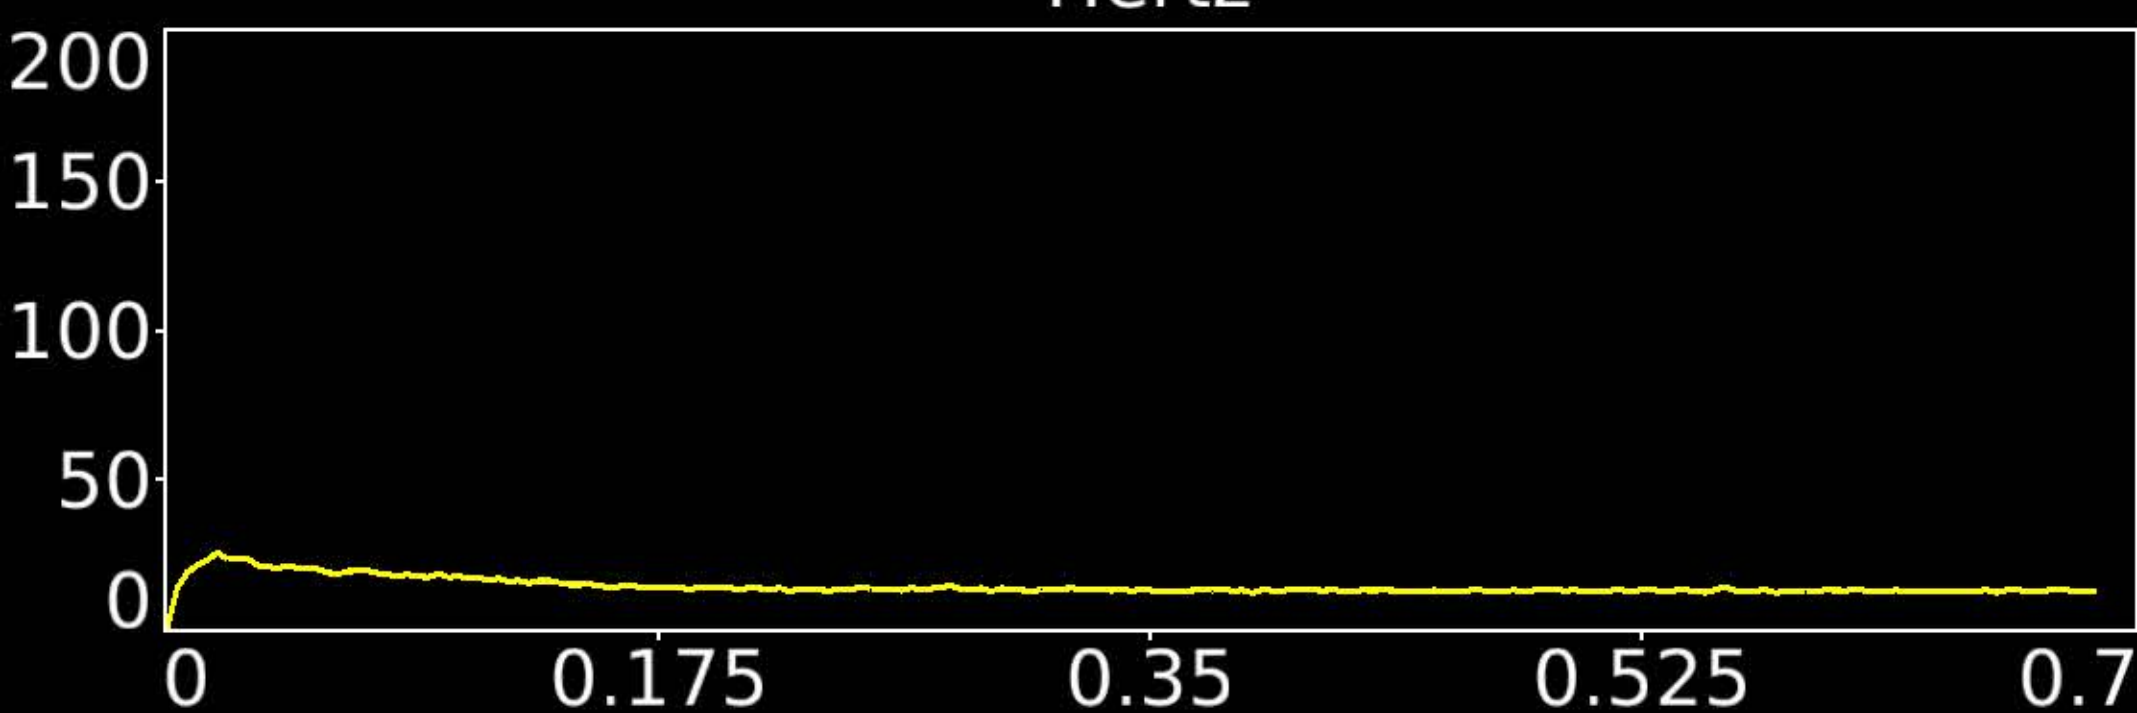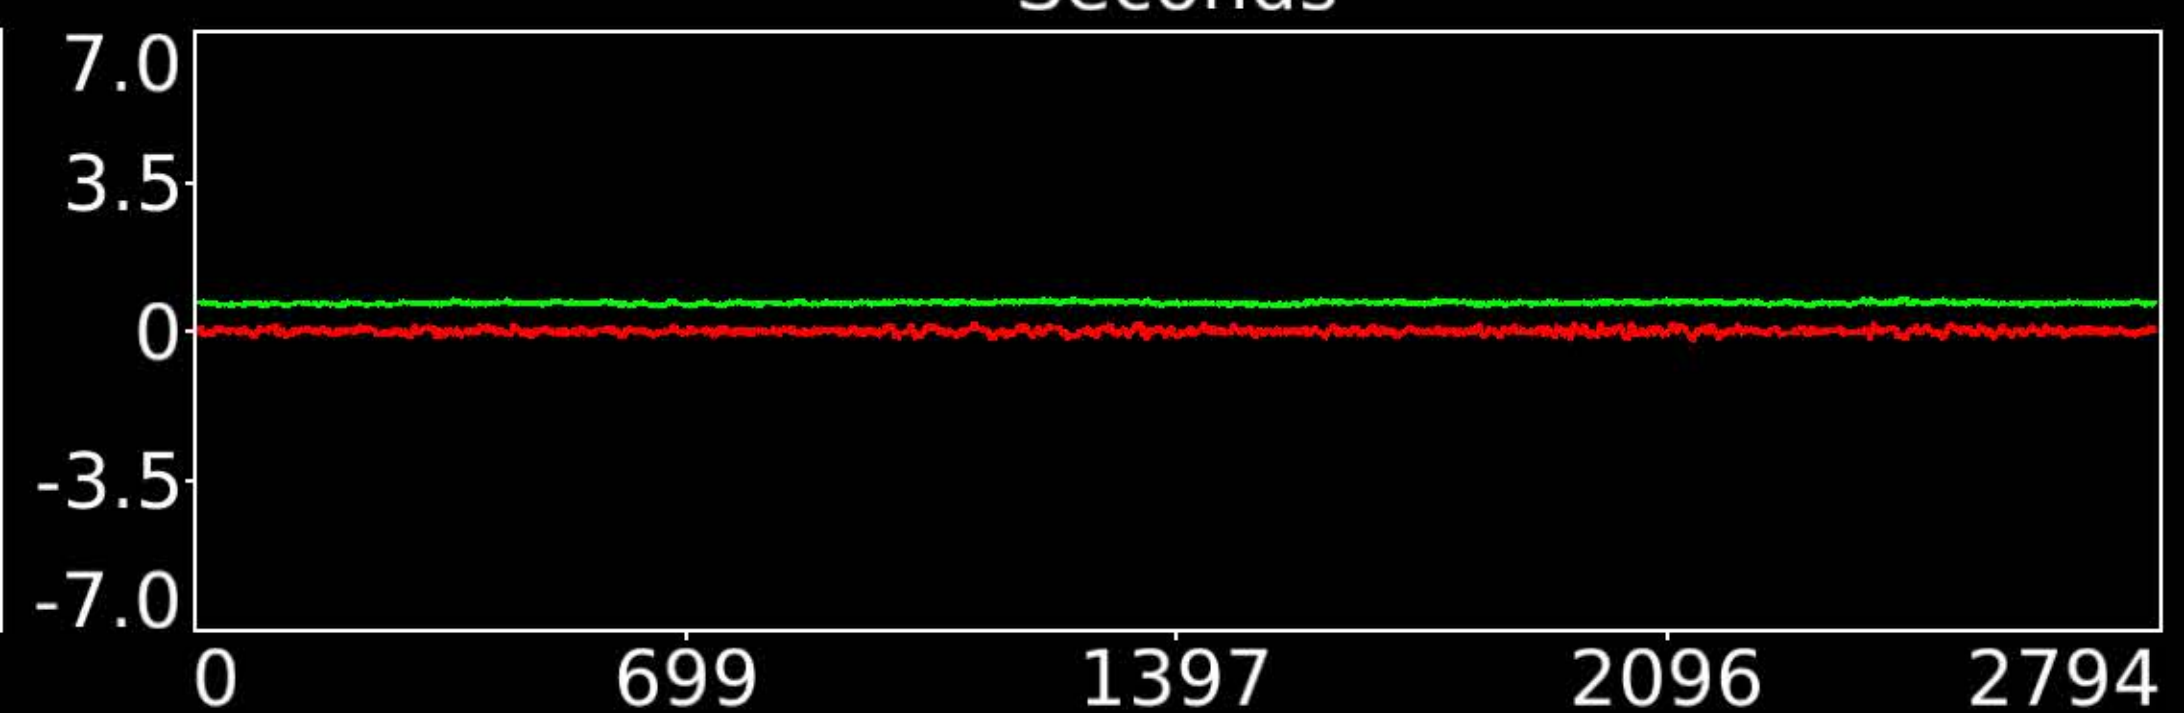

Number & Class: 54 Noise

Name: R Inferior Cerebellum > L Inferior Cerebellum

RVT Correlated: No

DVARS Dip Associated: No

Cross-Subject Variable: No

Single Subject: Yes

% Variance Explained: 0.73

Globality Index: 0.16

Rest Component: No

Taskr Component: 51

Task Modulated: No

Rationale: Single subject component whose spatial map is not reflective of known RSNs or Areas



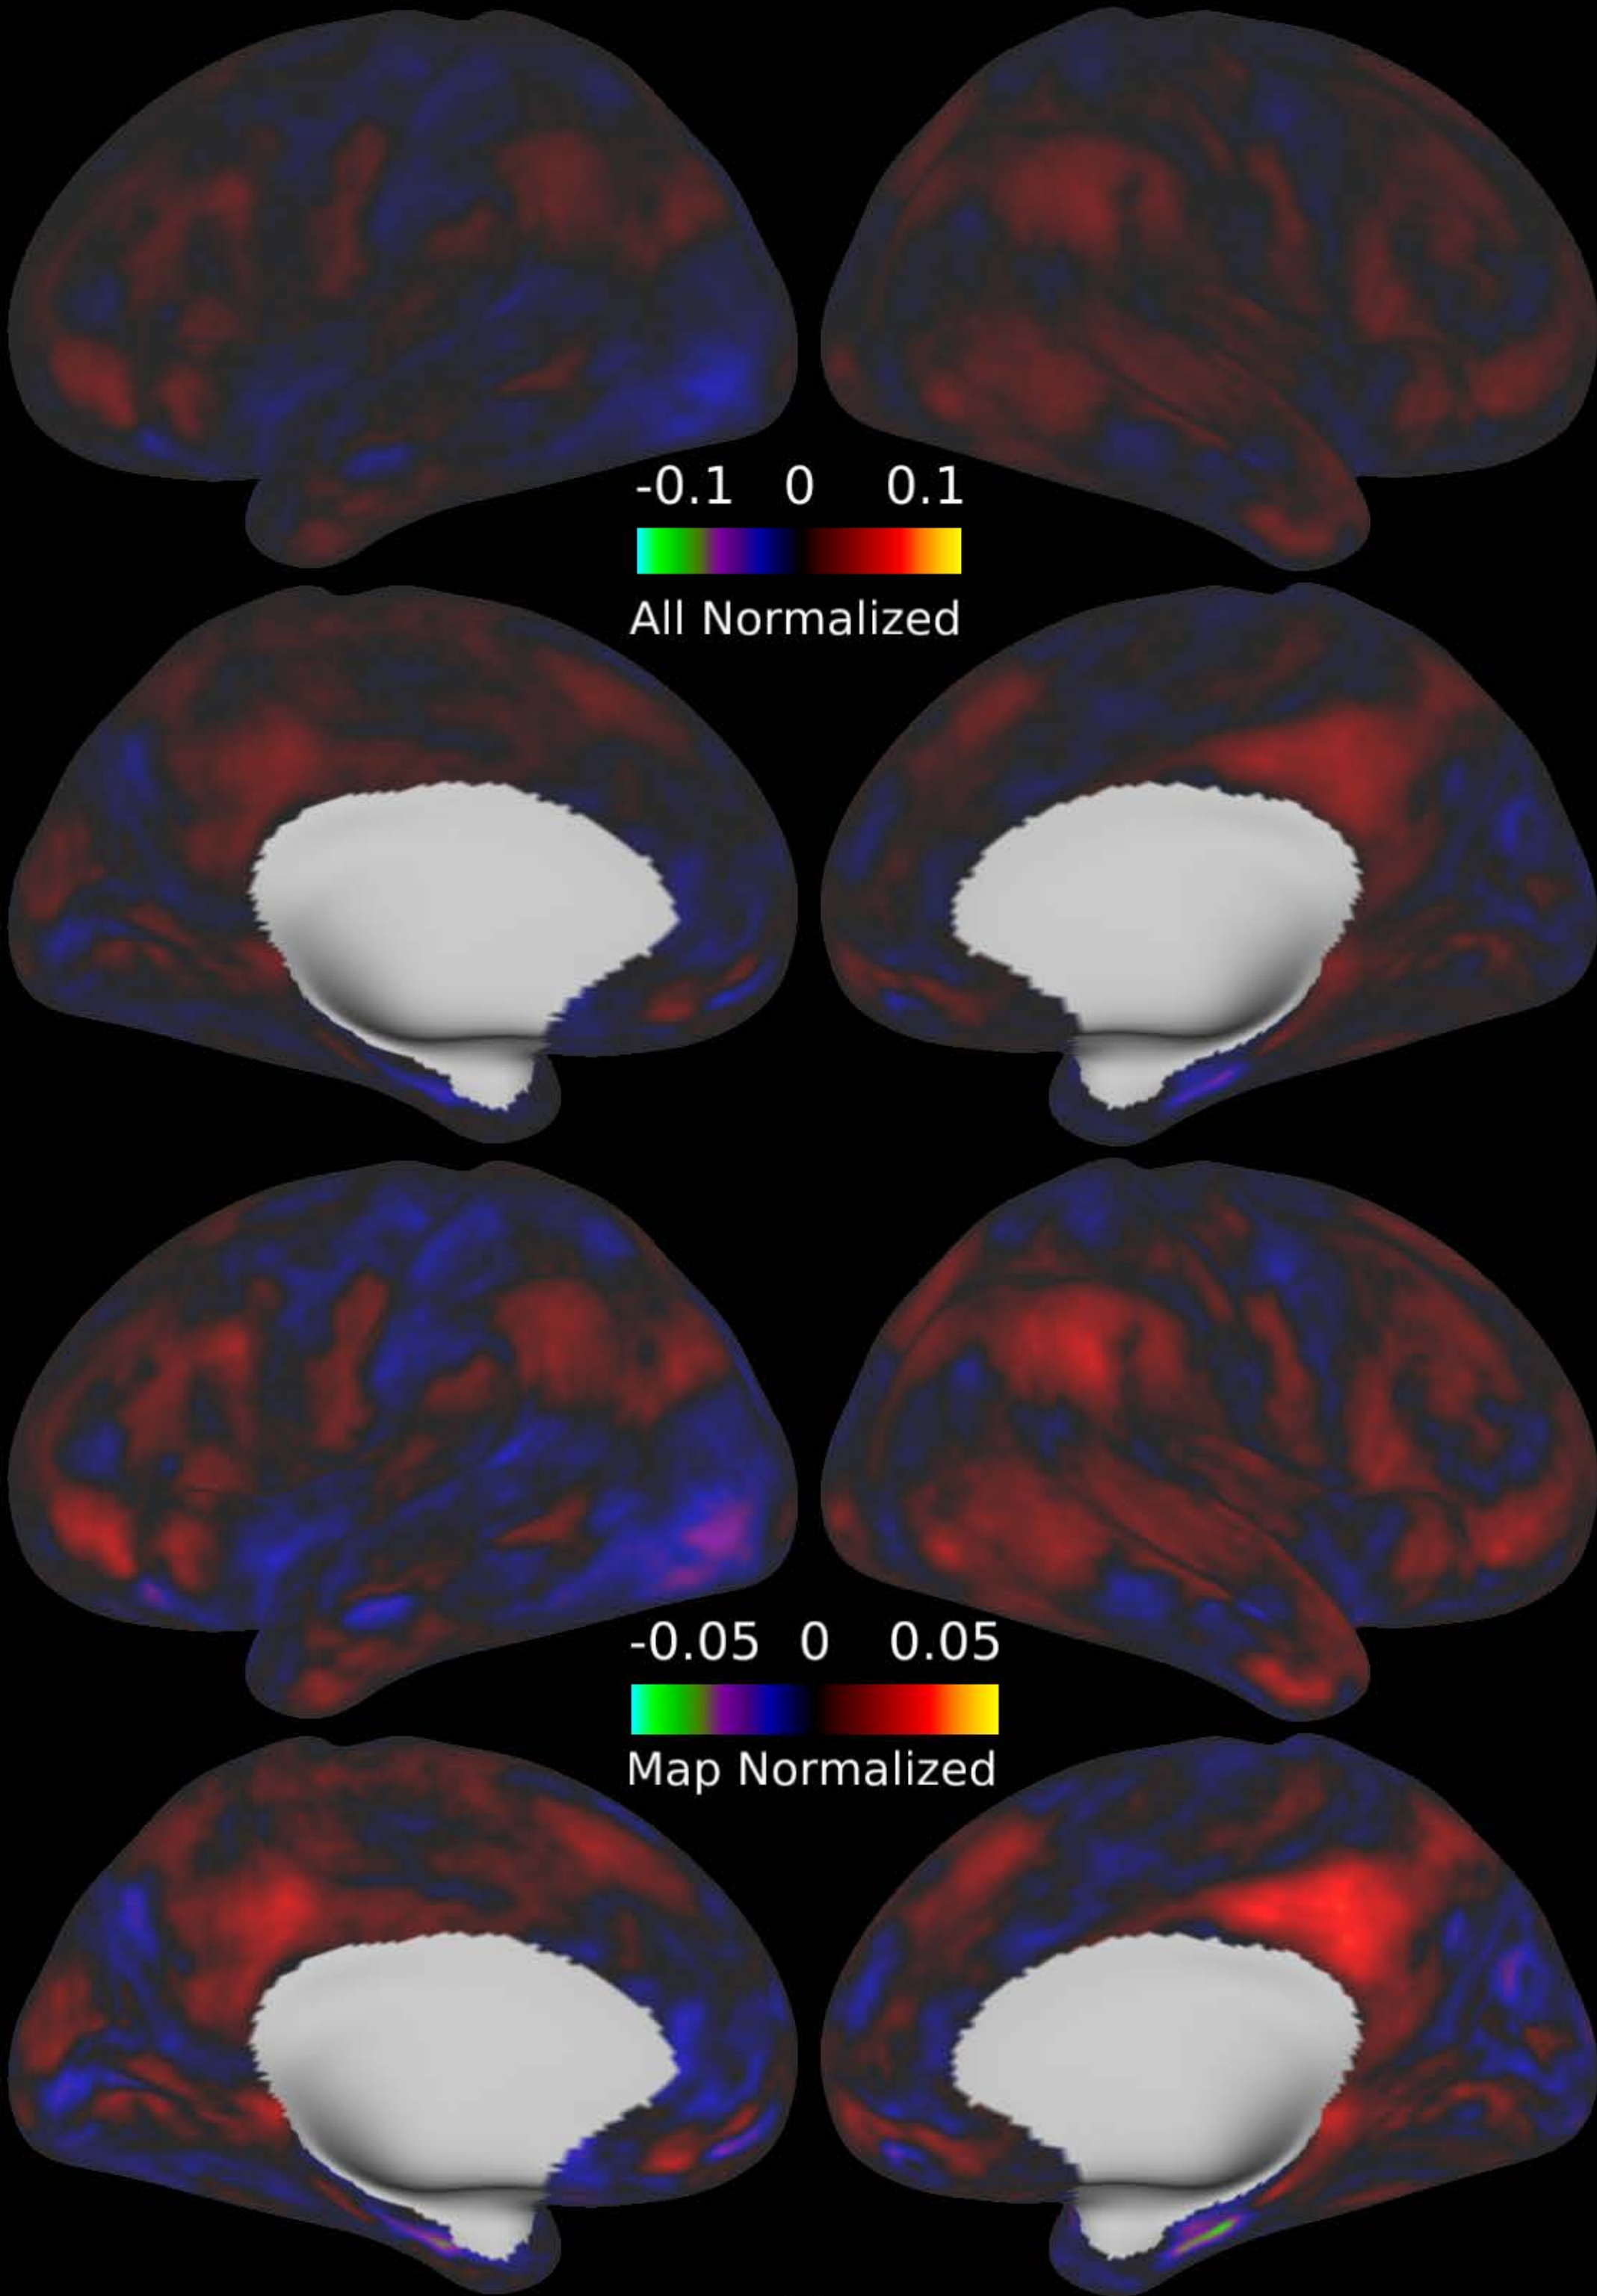

Hertz

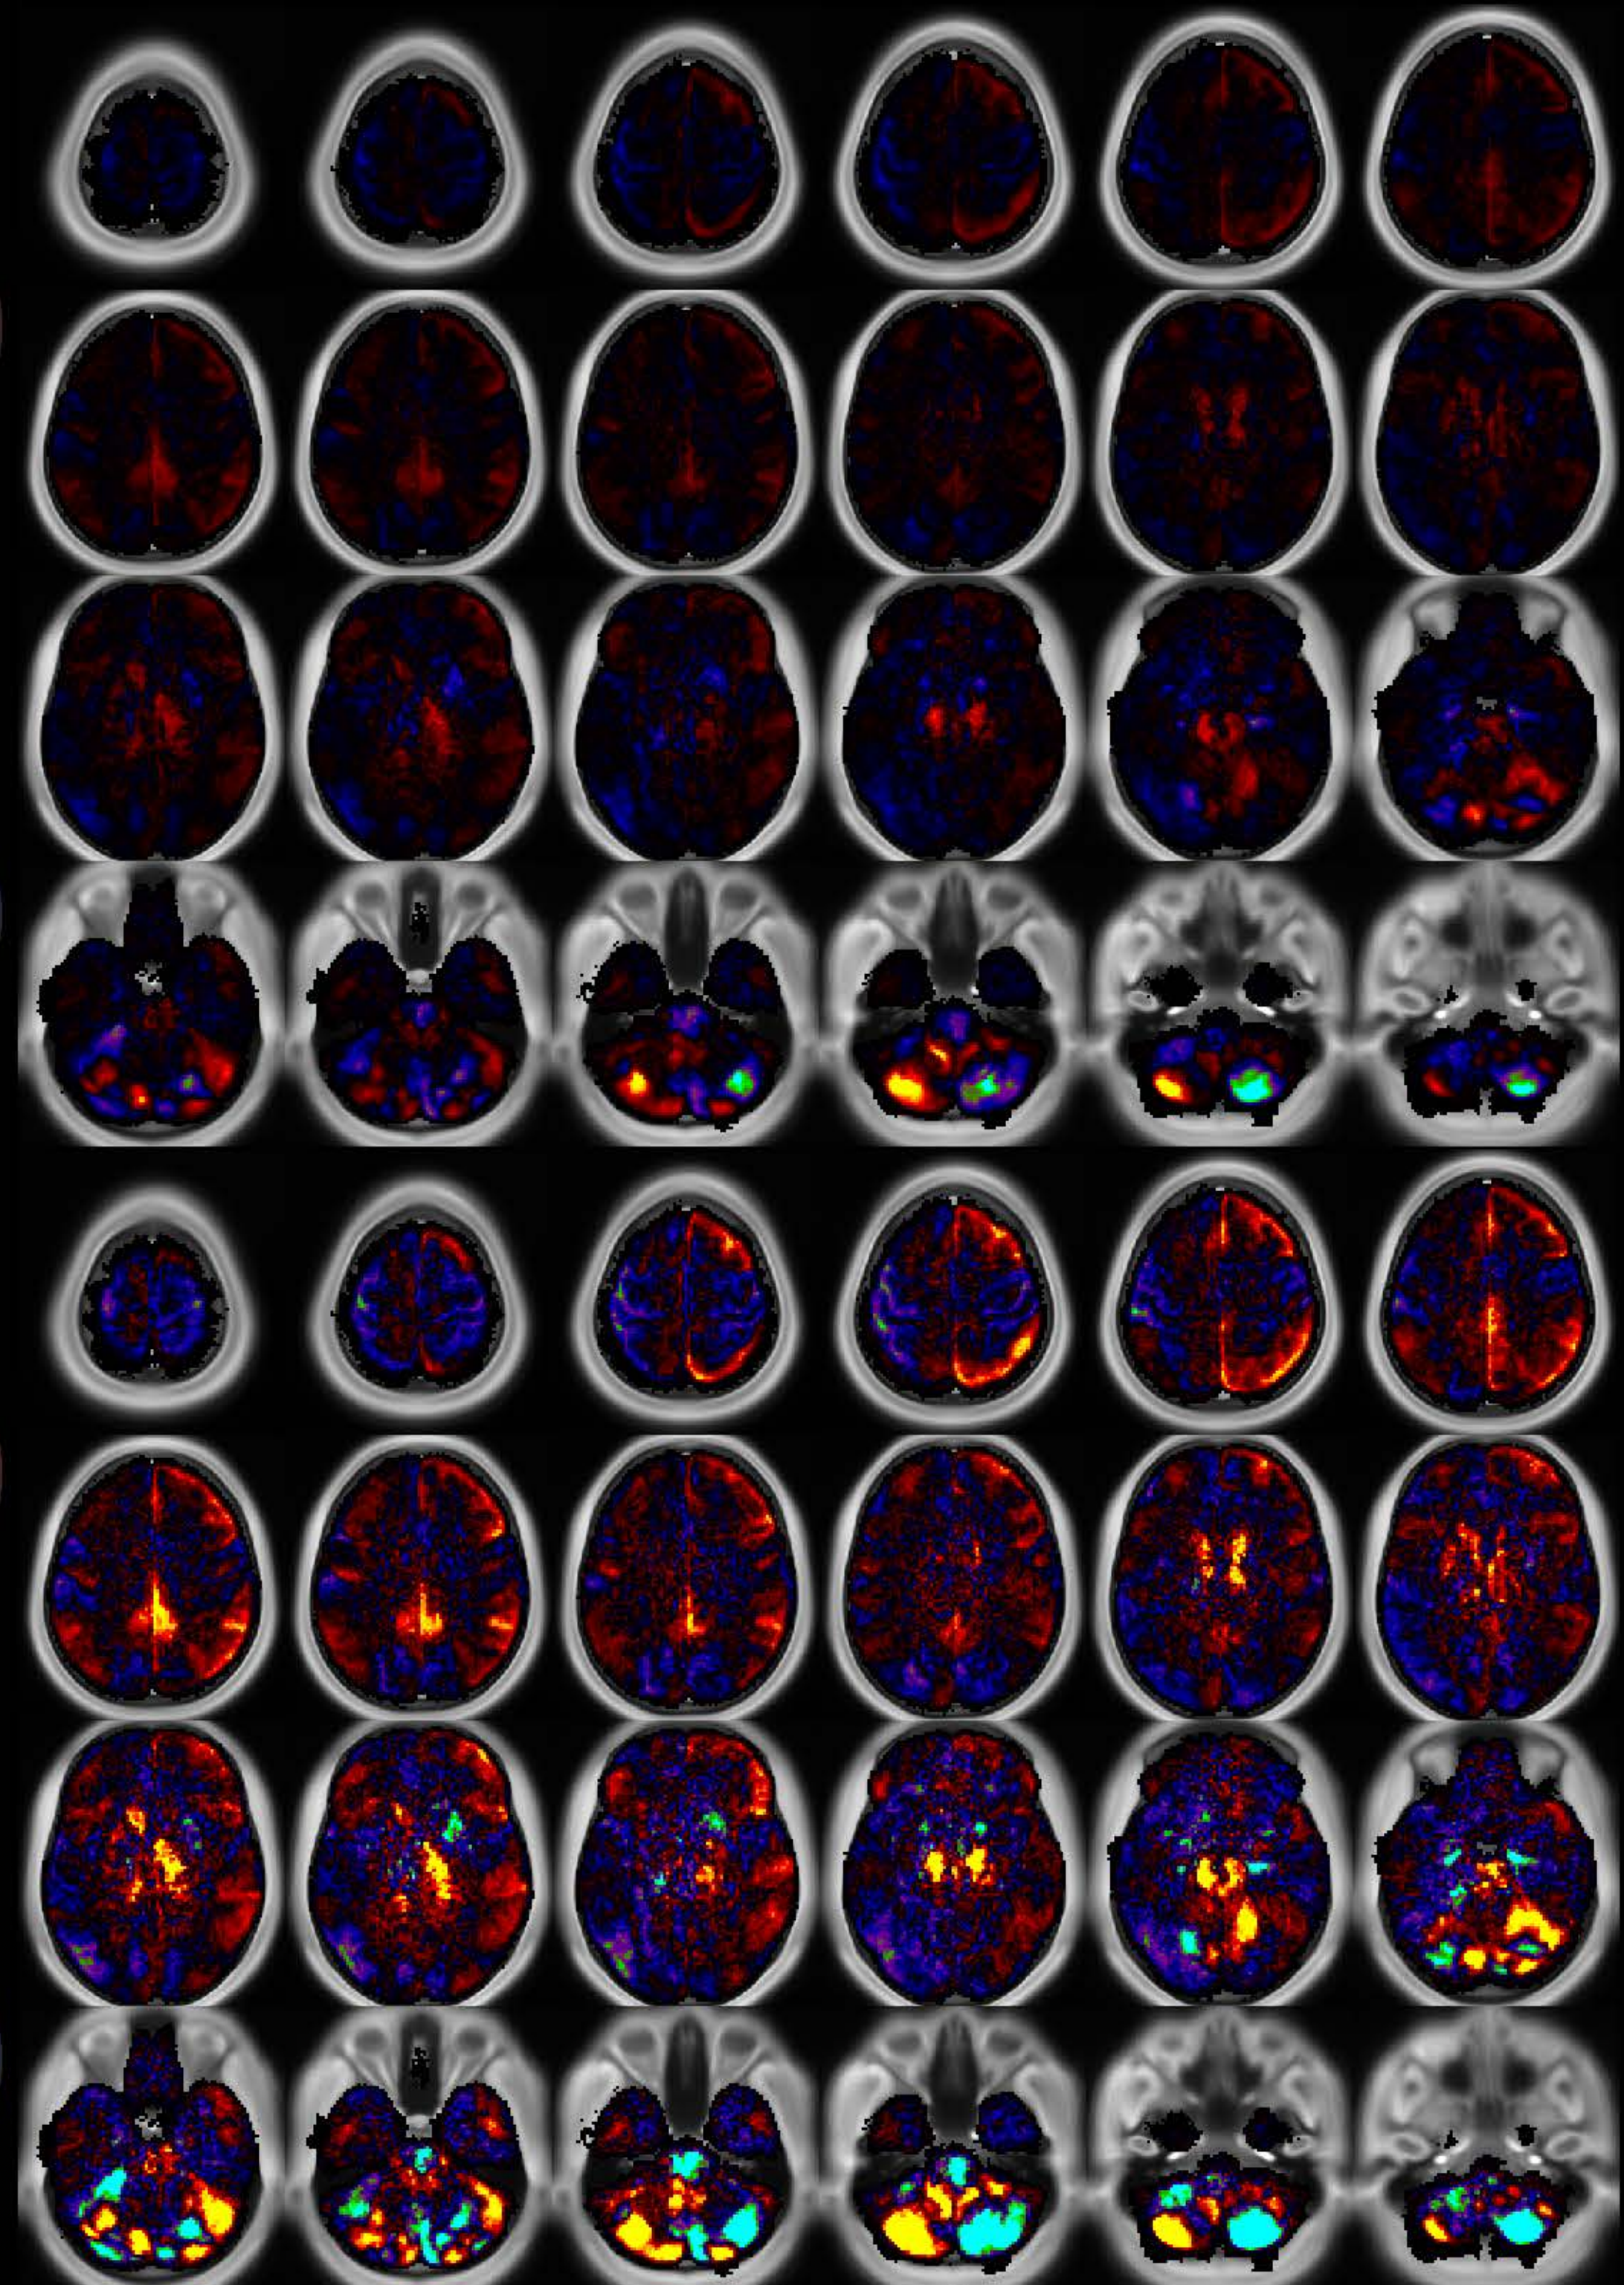

Seconds

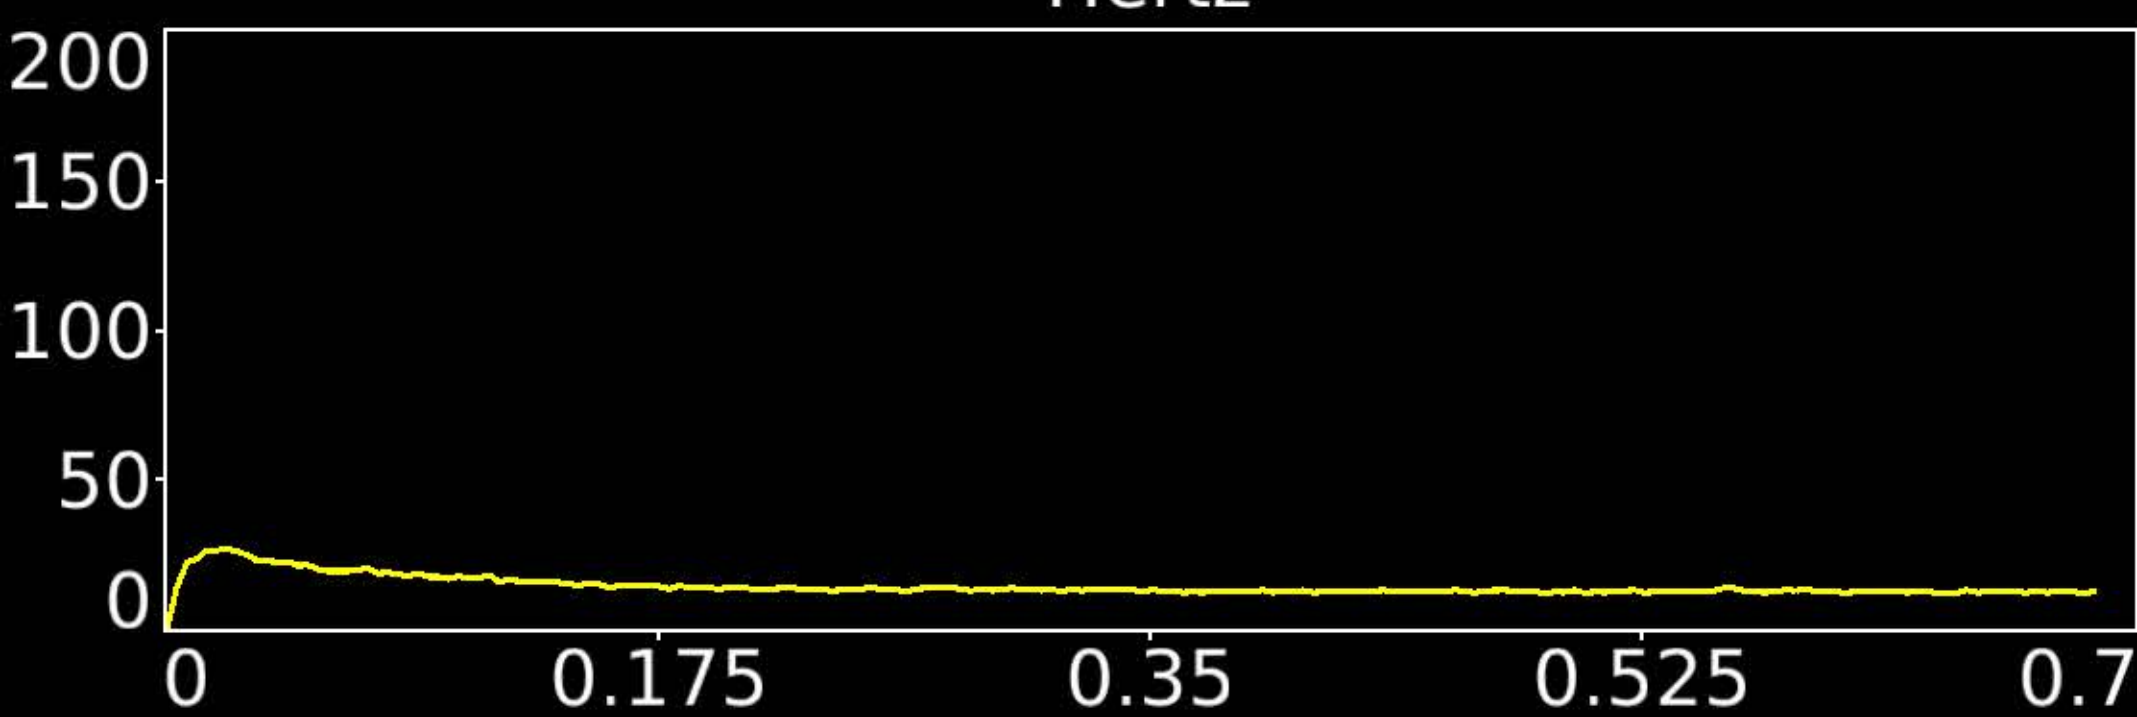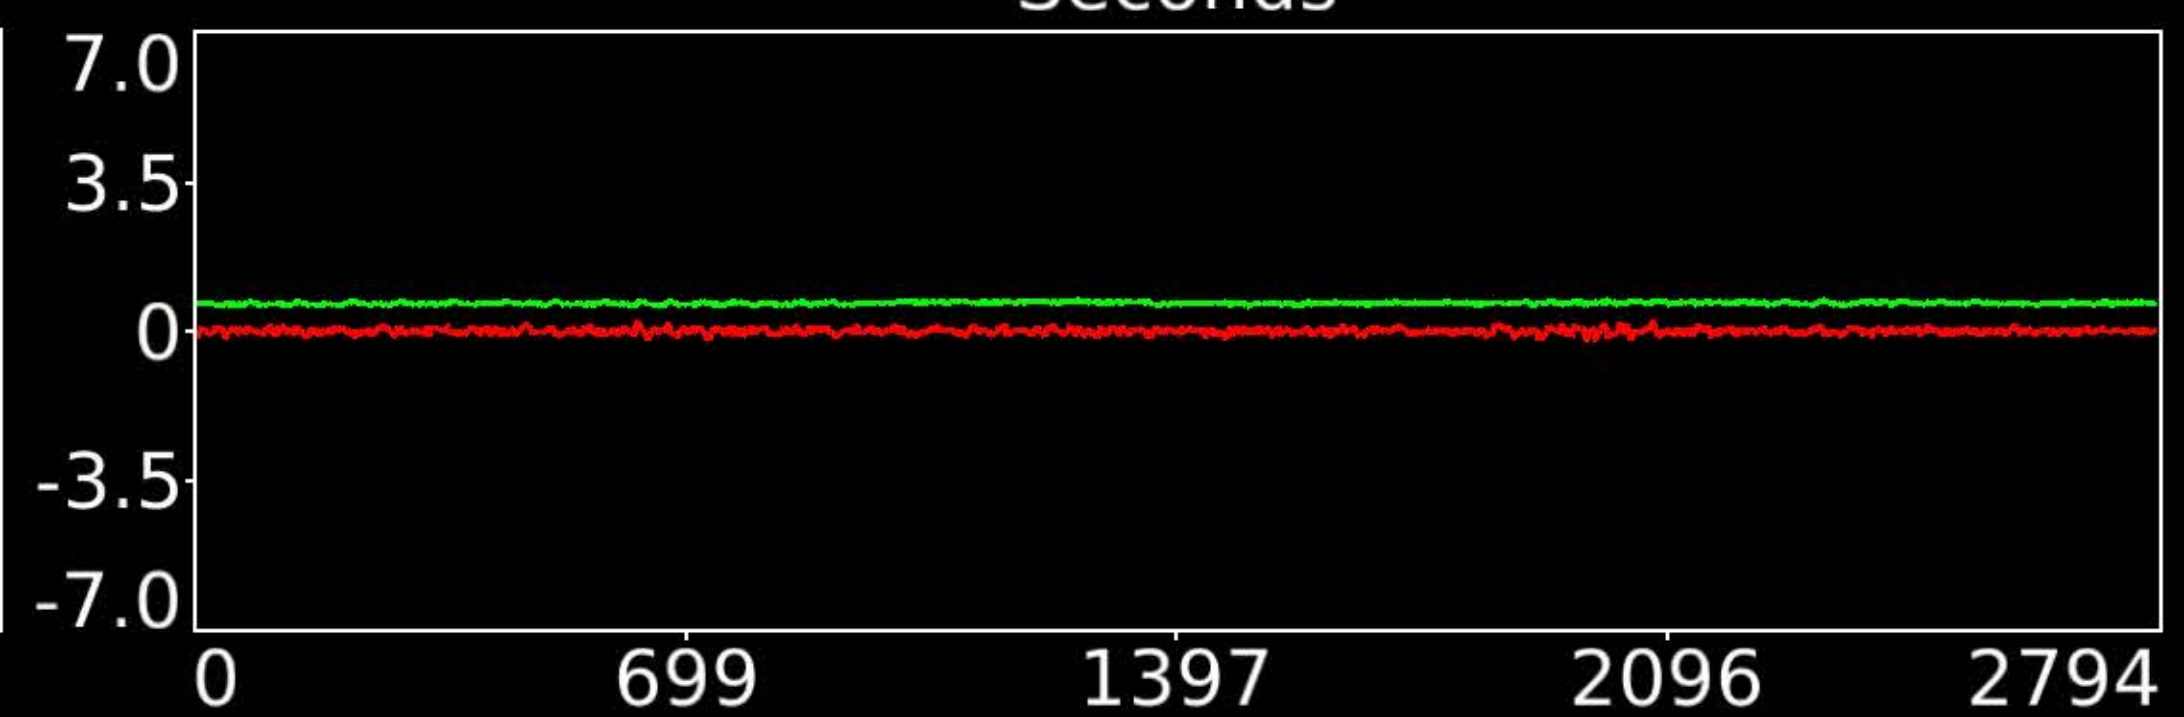

|                          |                            |                                                     |  |
|--------------------------|----------------------------|-----------------------------------------------------|--|
| Number & Class: 55 Noise |                            | Name: L Inferior Cerebellum > R Inferior Cerebellum |  |
| RVT Correlated: No       | DVARS Dip Associated: Yes  | Cross-Subject Variable: No                          |  |
| Single Subject: Yes      | % Variance Explained: 0.72 | Globality Index: 0.15                               |  |
| Rest Component: No       | Taskr Component: 54        | Task Modulated: No                                  |  |

Rationale: DVARS Dip associated single subject component whose spatial map is not reflective of known RSNs or Areas



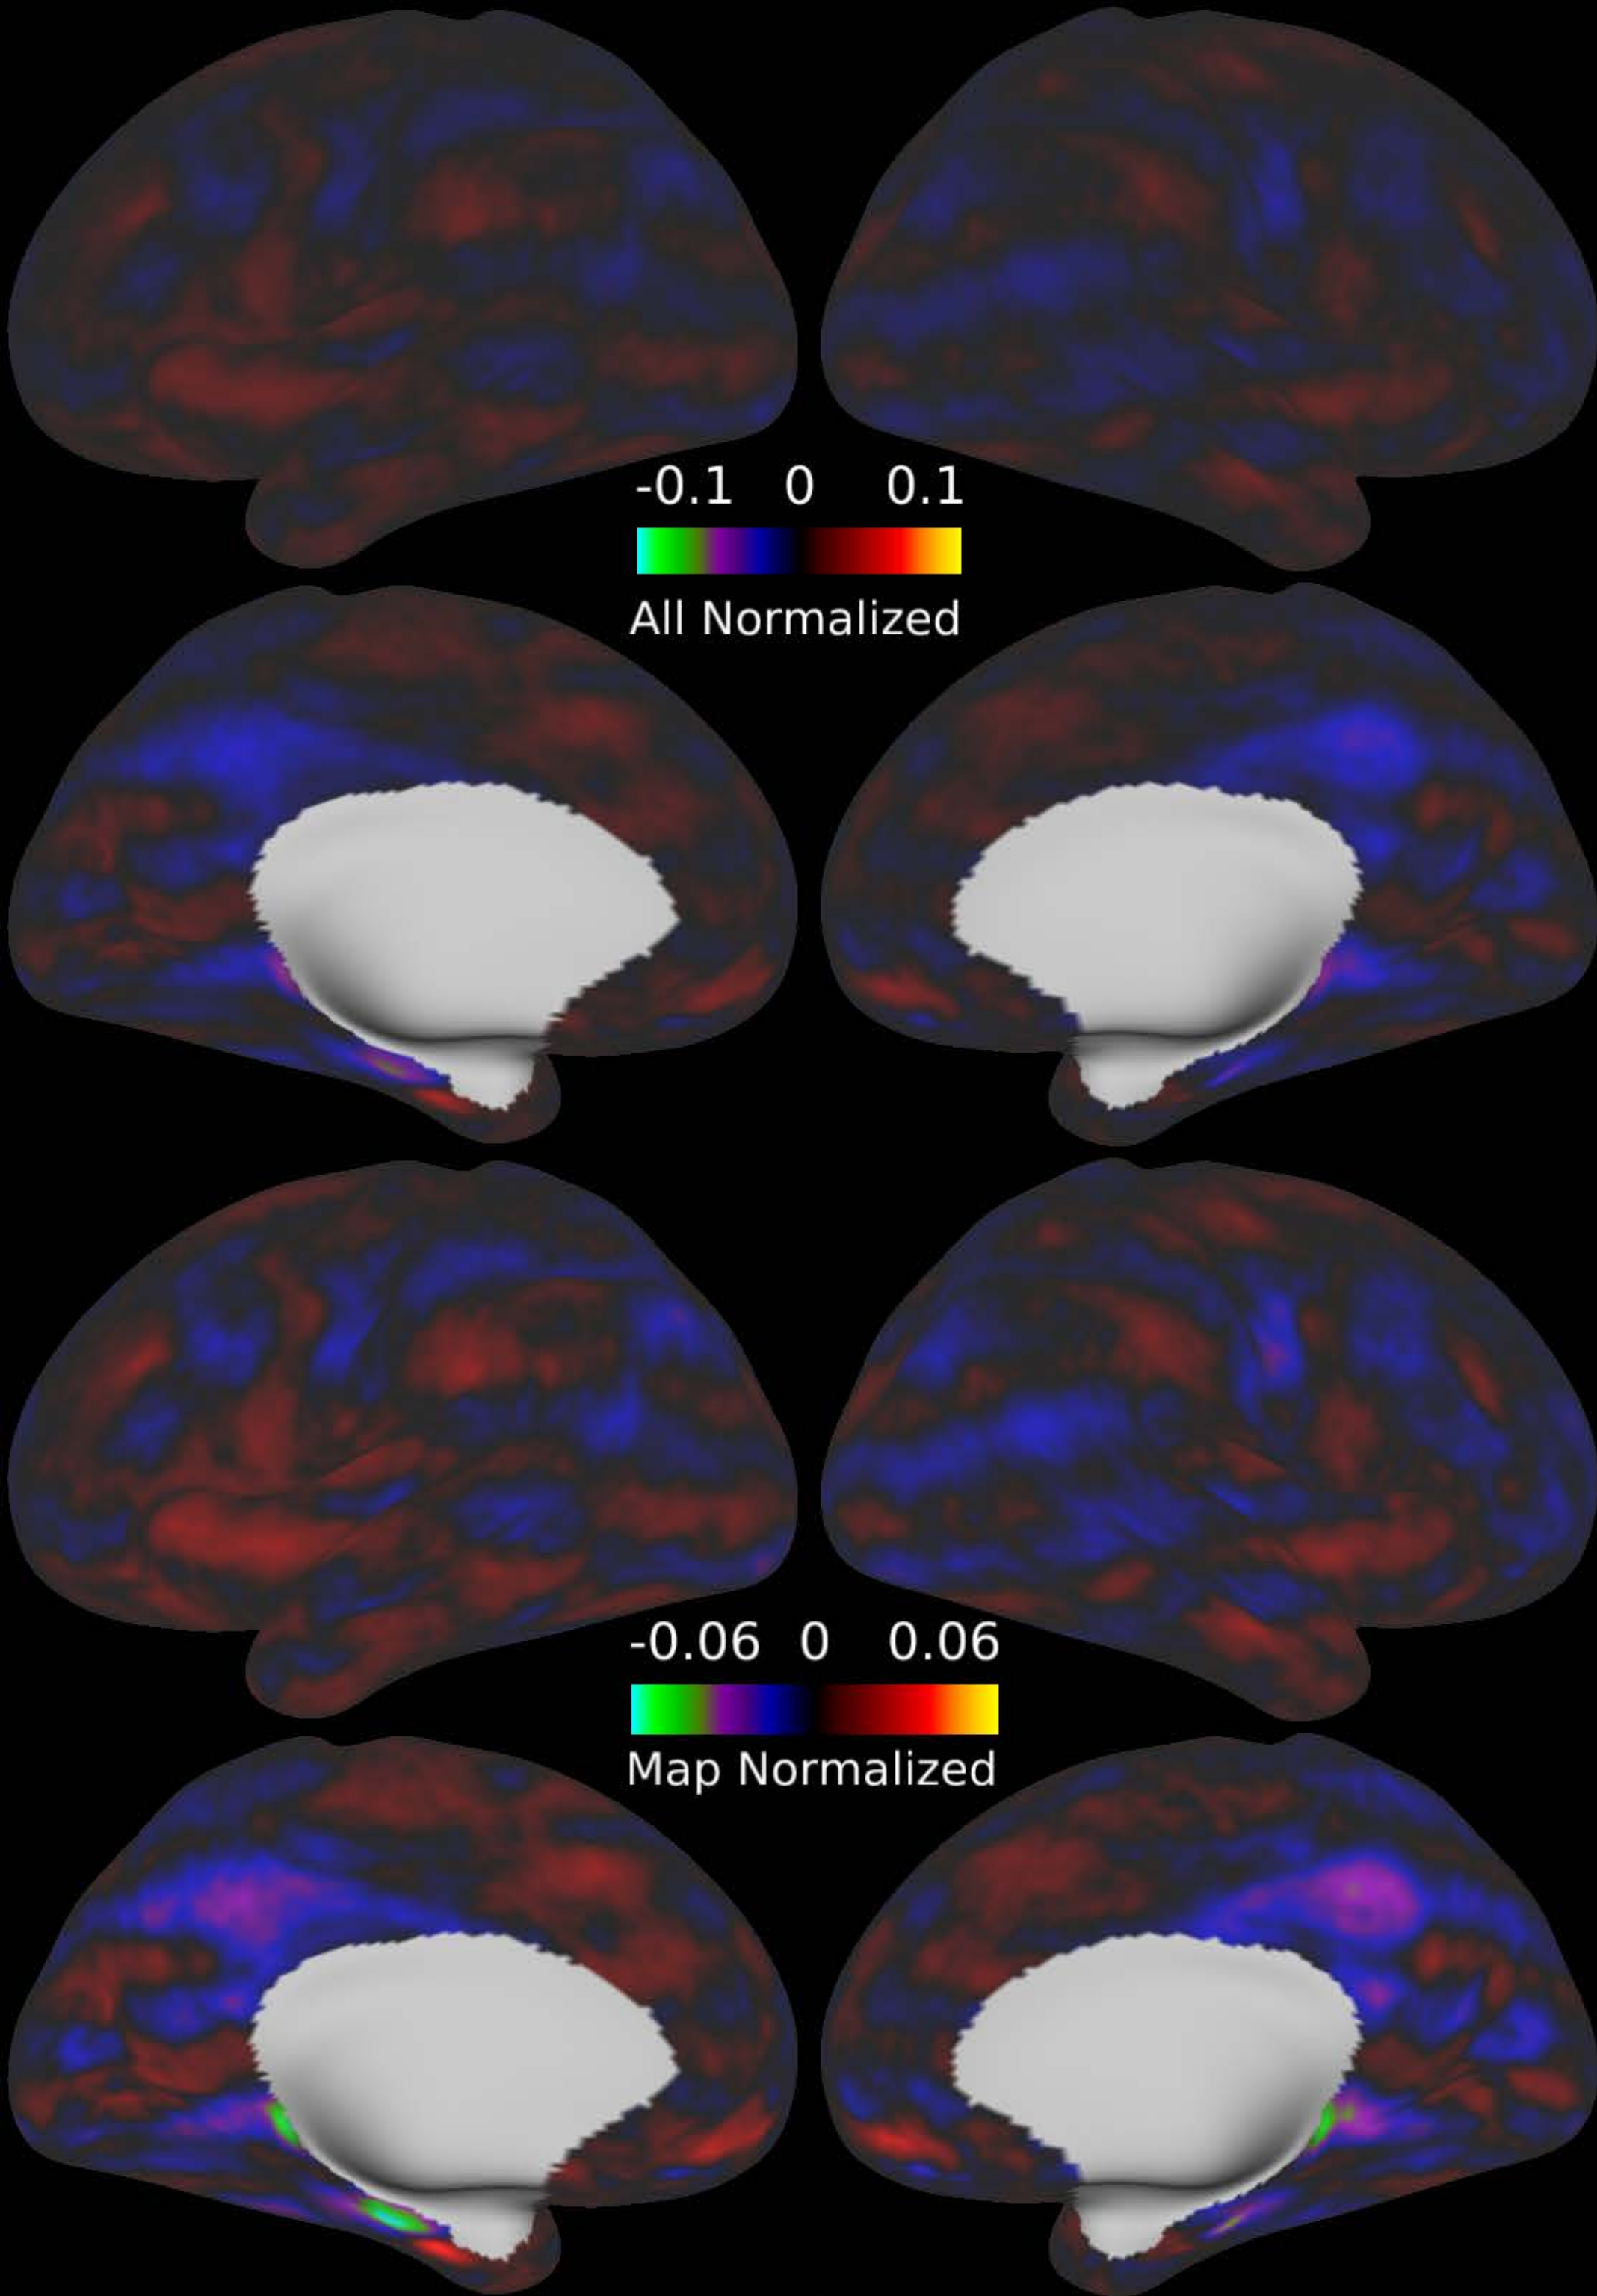

Hertz

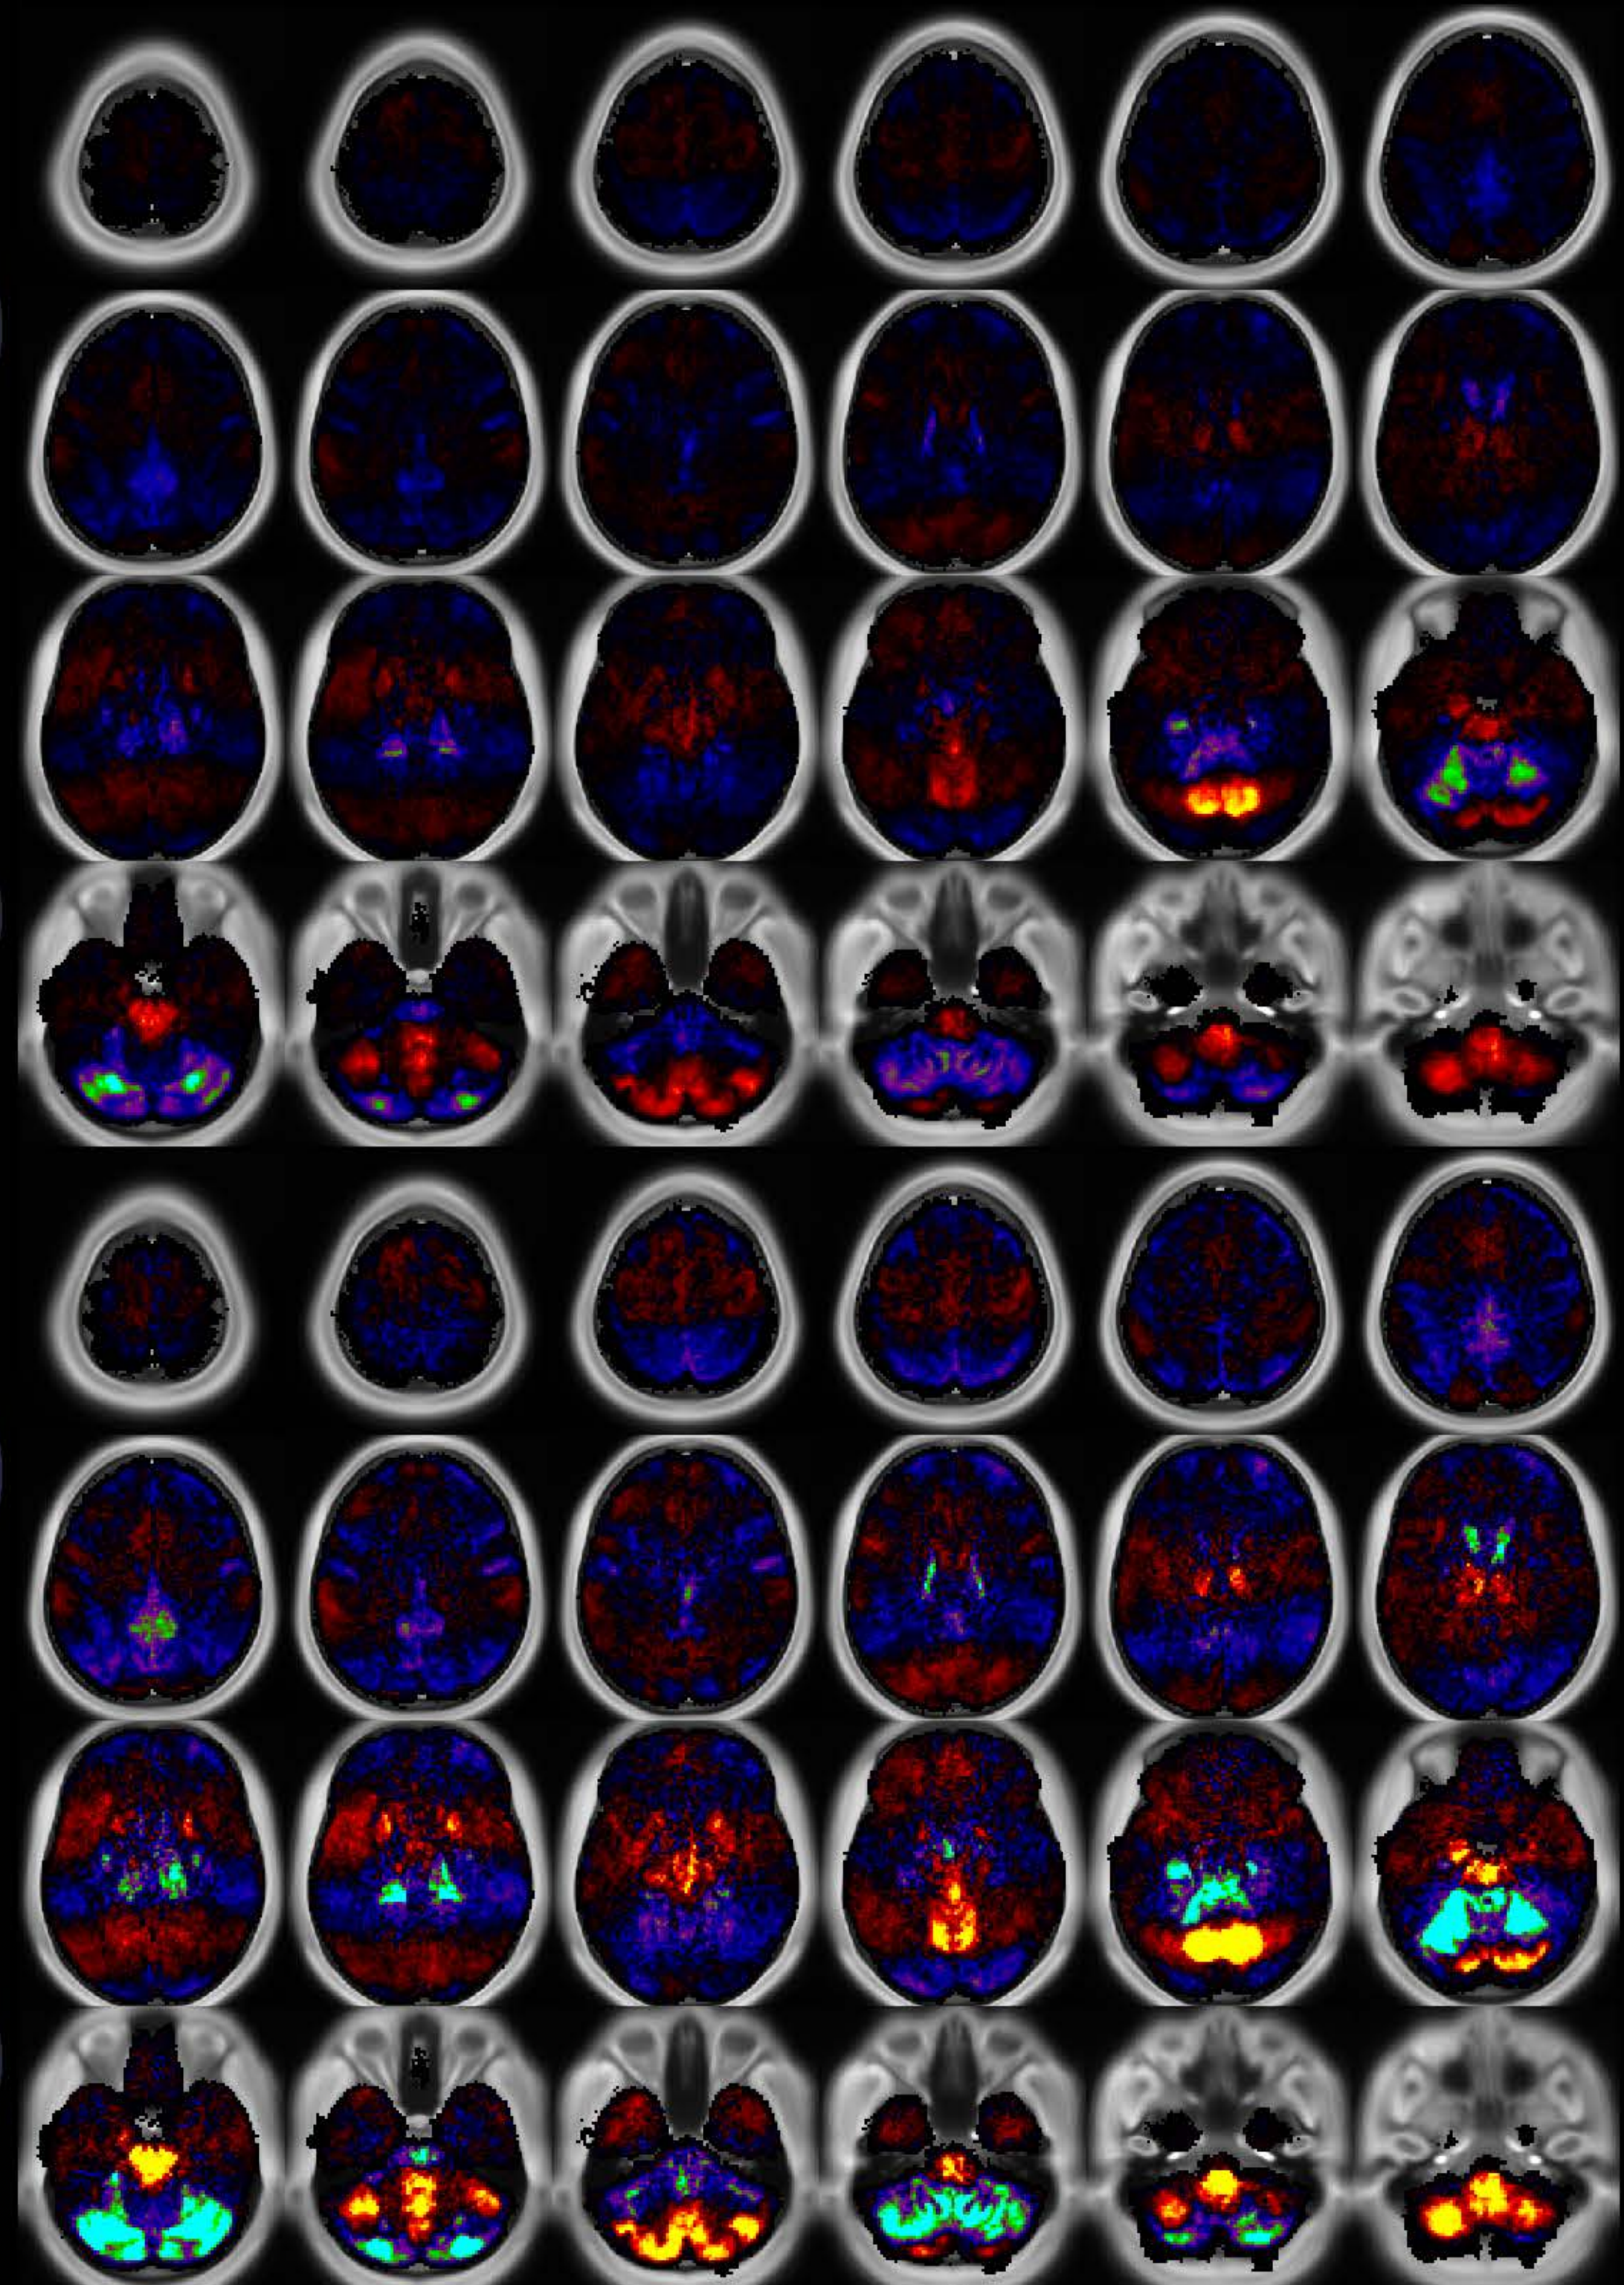

Seconds

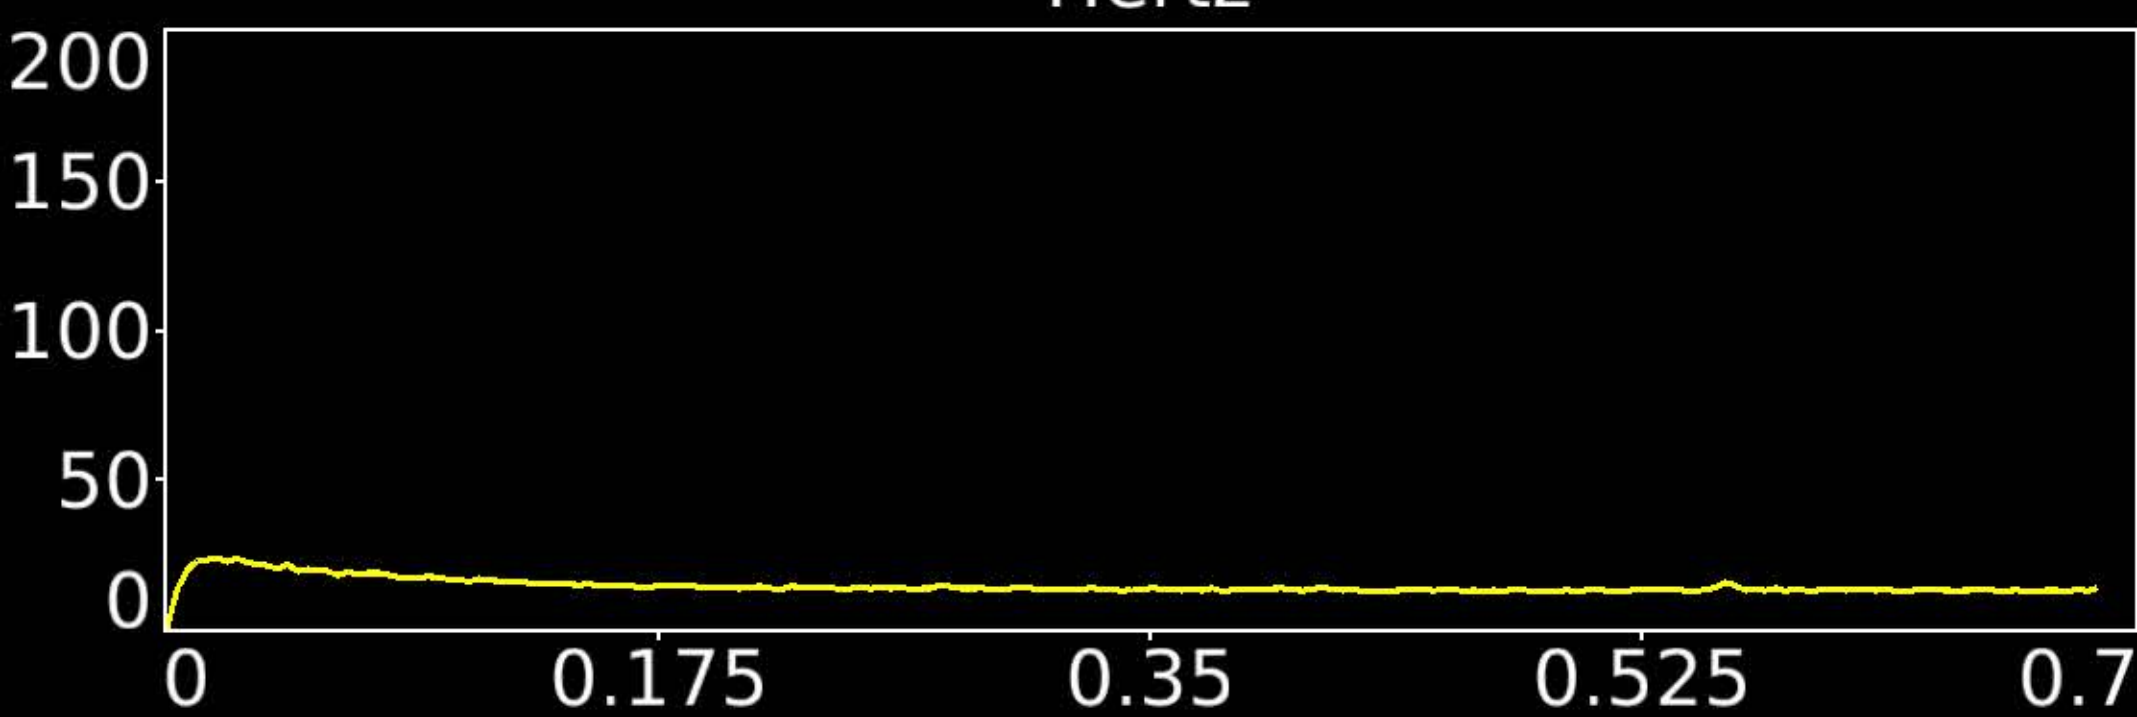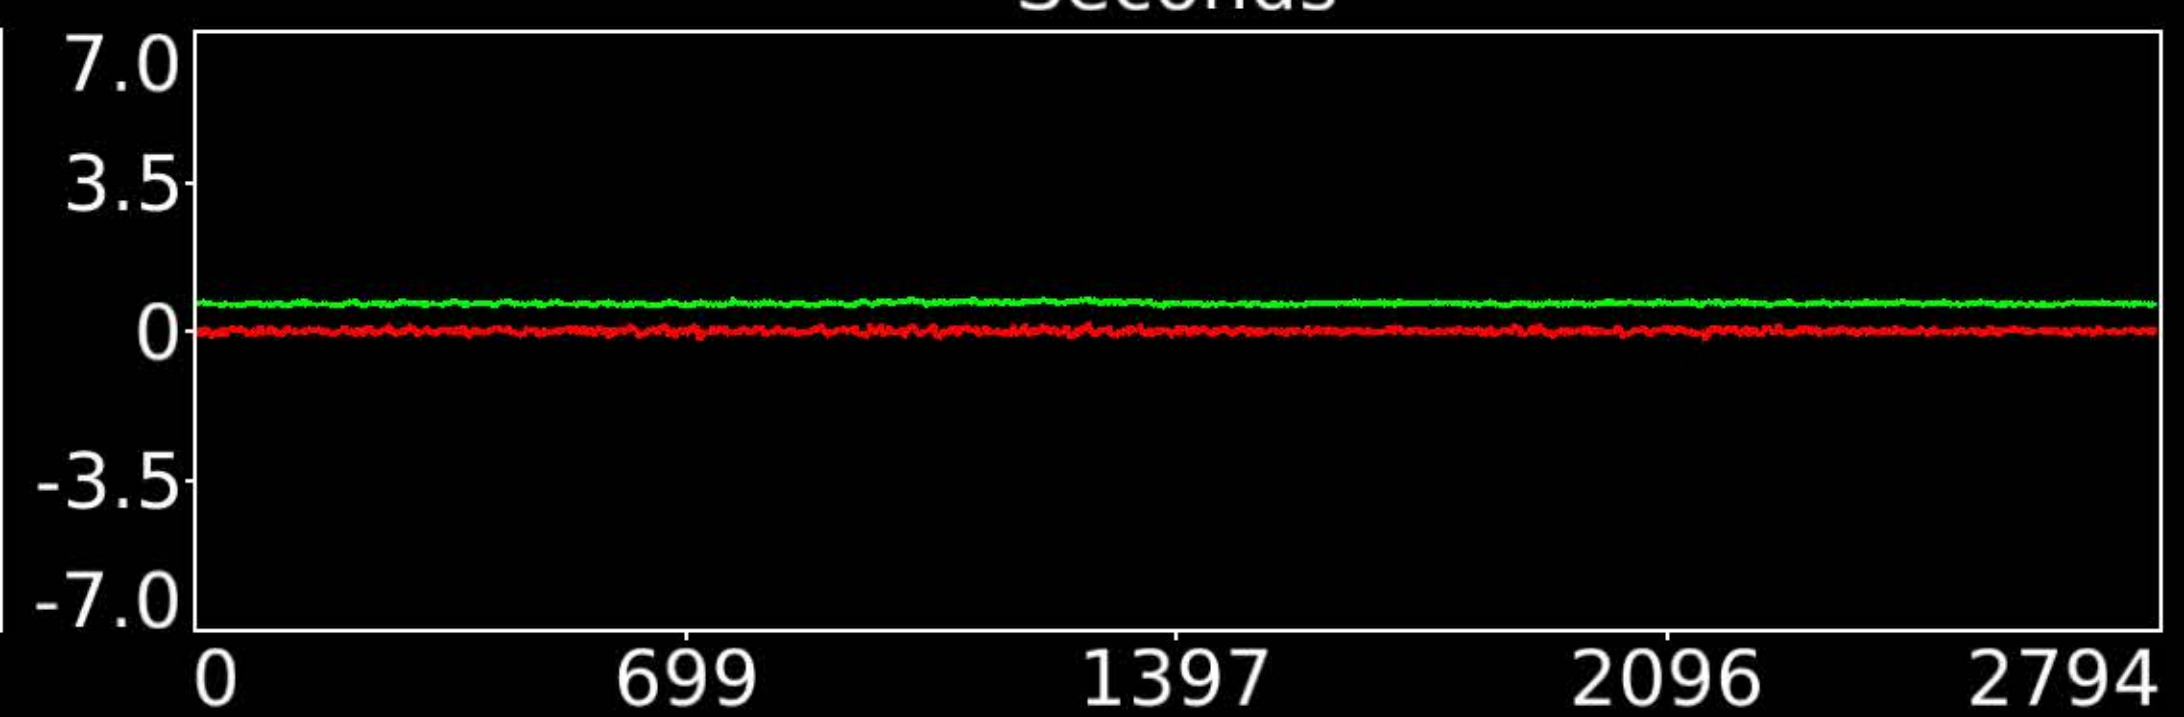

|                          |                           |                            |  |
|--------------------------|---------------------------|----------------------------|--|
| Number & Class: 56 Noise |                           | Name: Recon Artifact       |  |
| RVT Correlated: No       | DVARS Dip Associated: Yes | Cross-Subject Variable: No |  |
| Single Subject: No       | % Variance Explained: 0.7 | Globality Index: 0.17      |  |
| Rest Component: No       | Taskr Component: No       | Task Modulated: No         |  |

Rationale: Obvious banding in sagittal plane suggestive of multi-band reconstruction artifact; DVARS dips associated



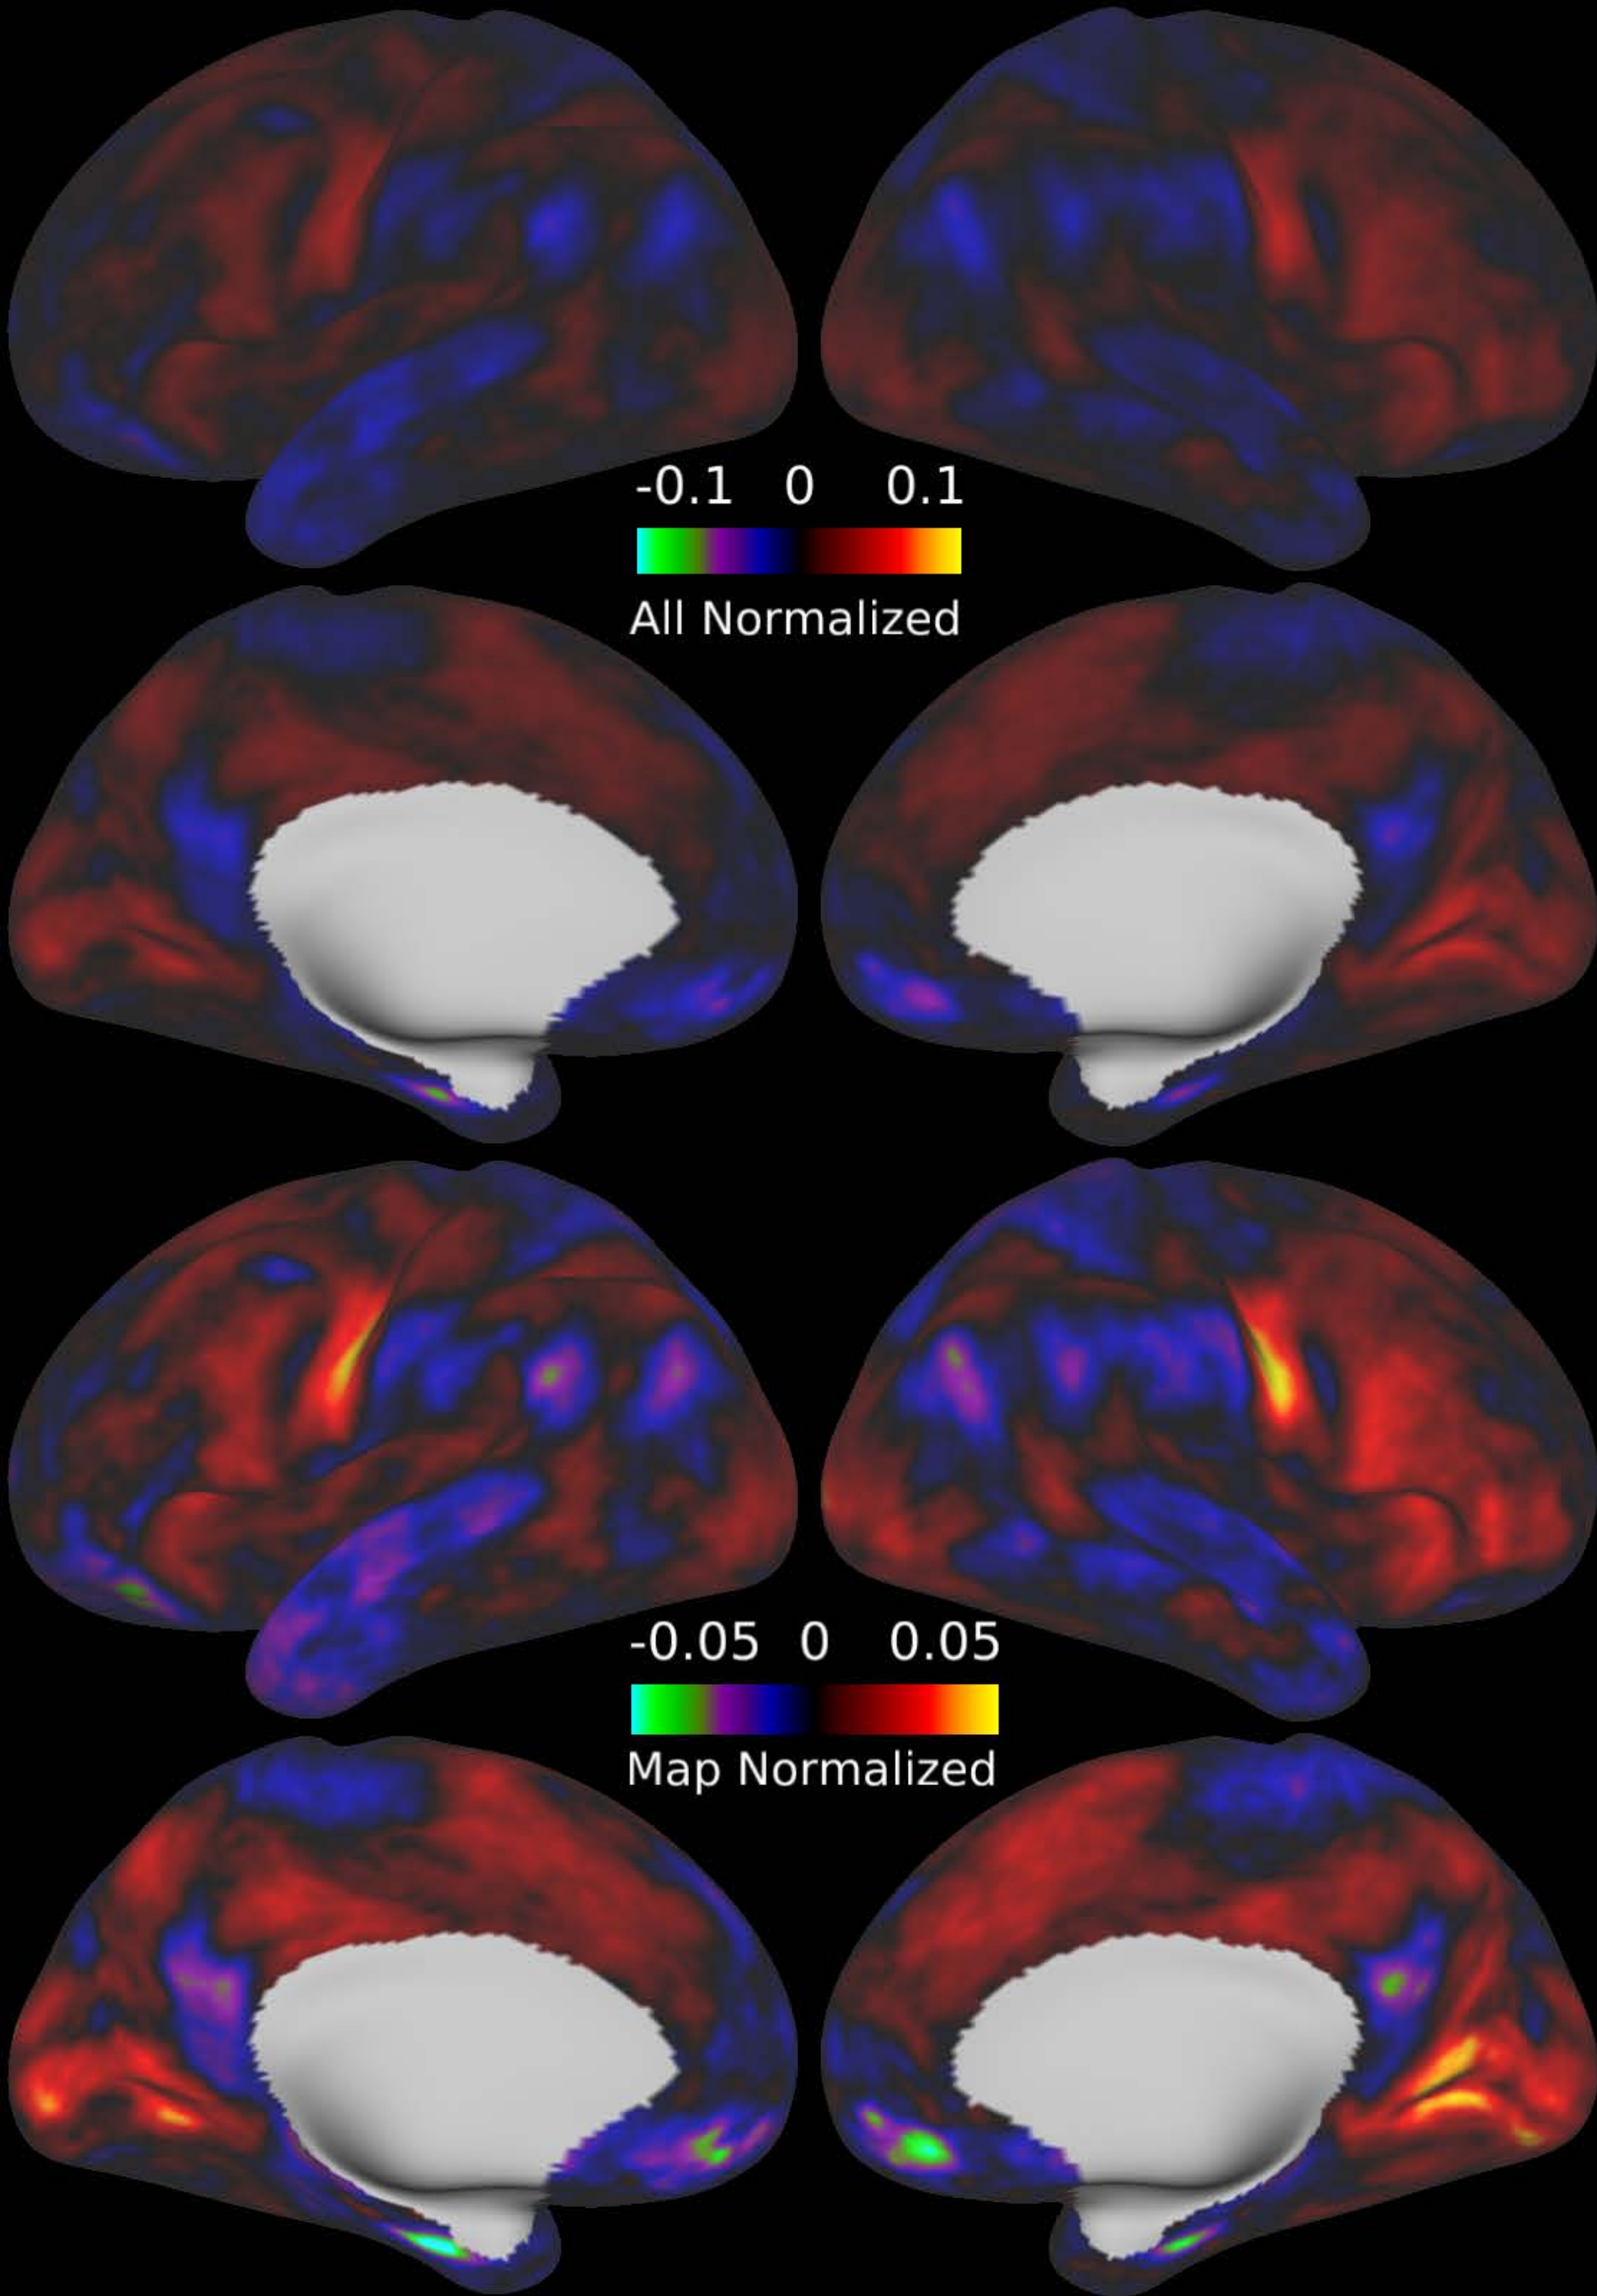

Hertz

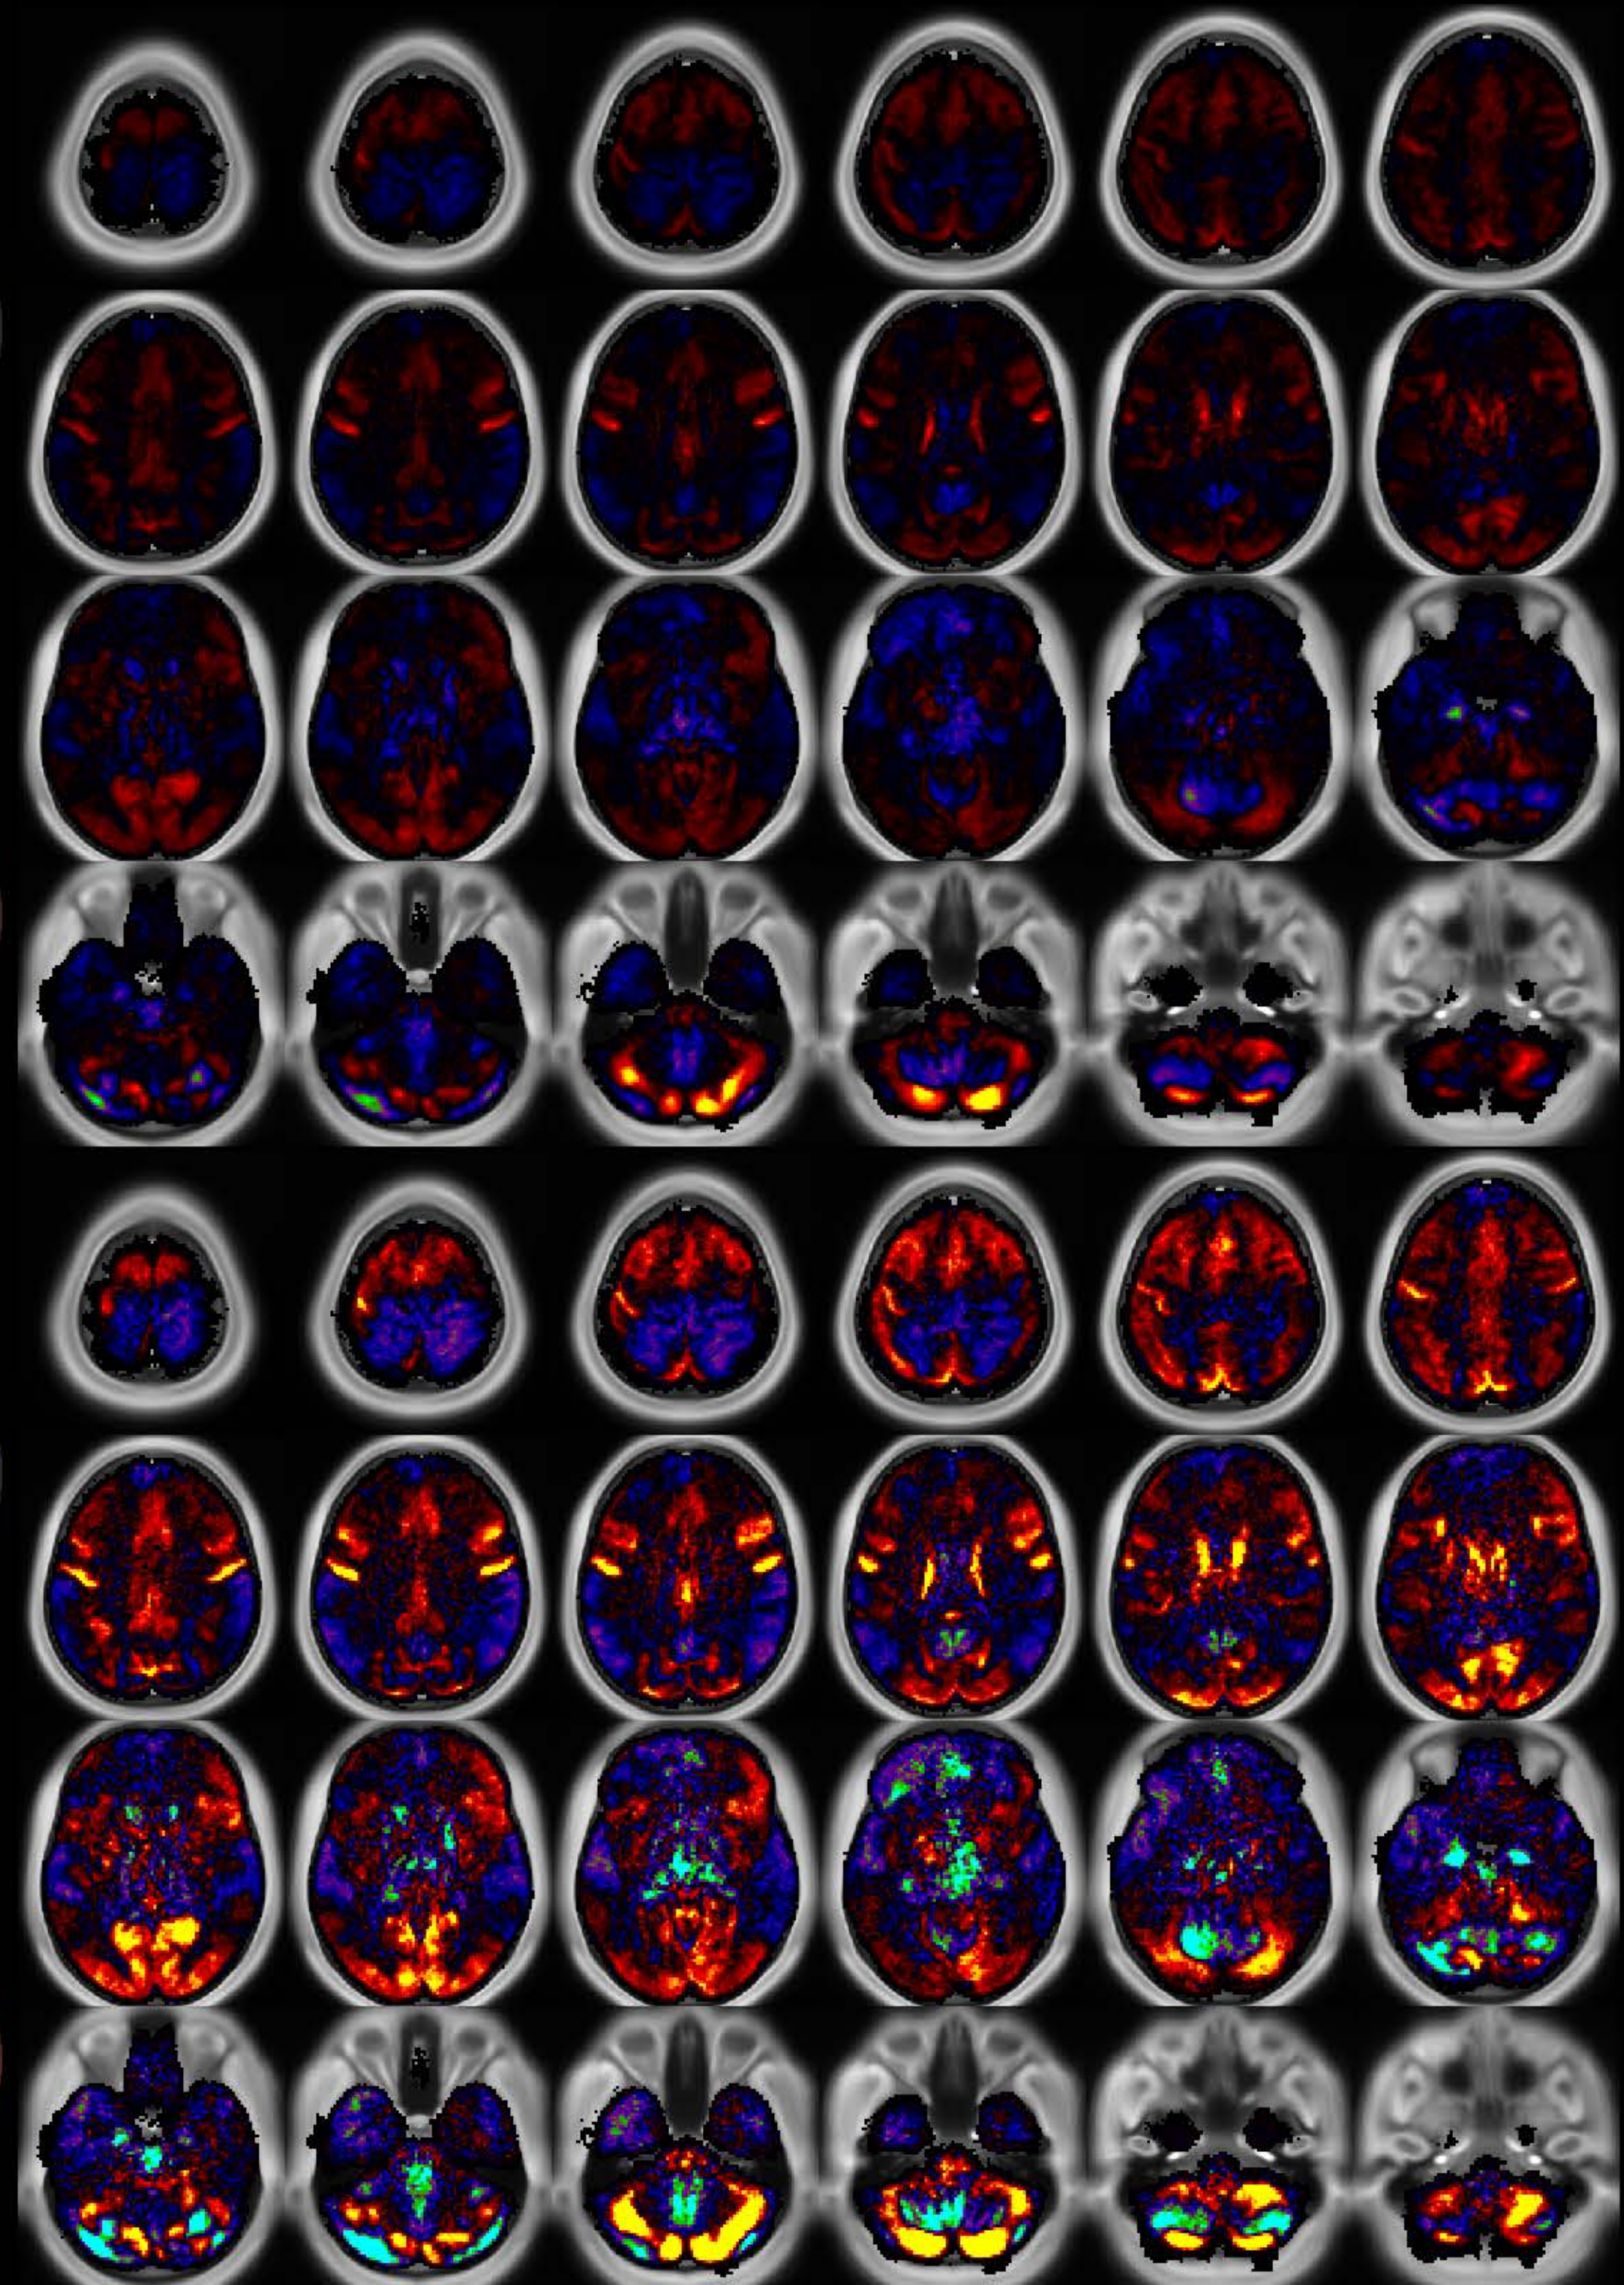

Seconds

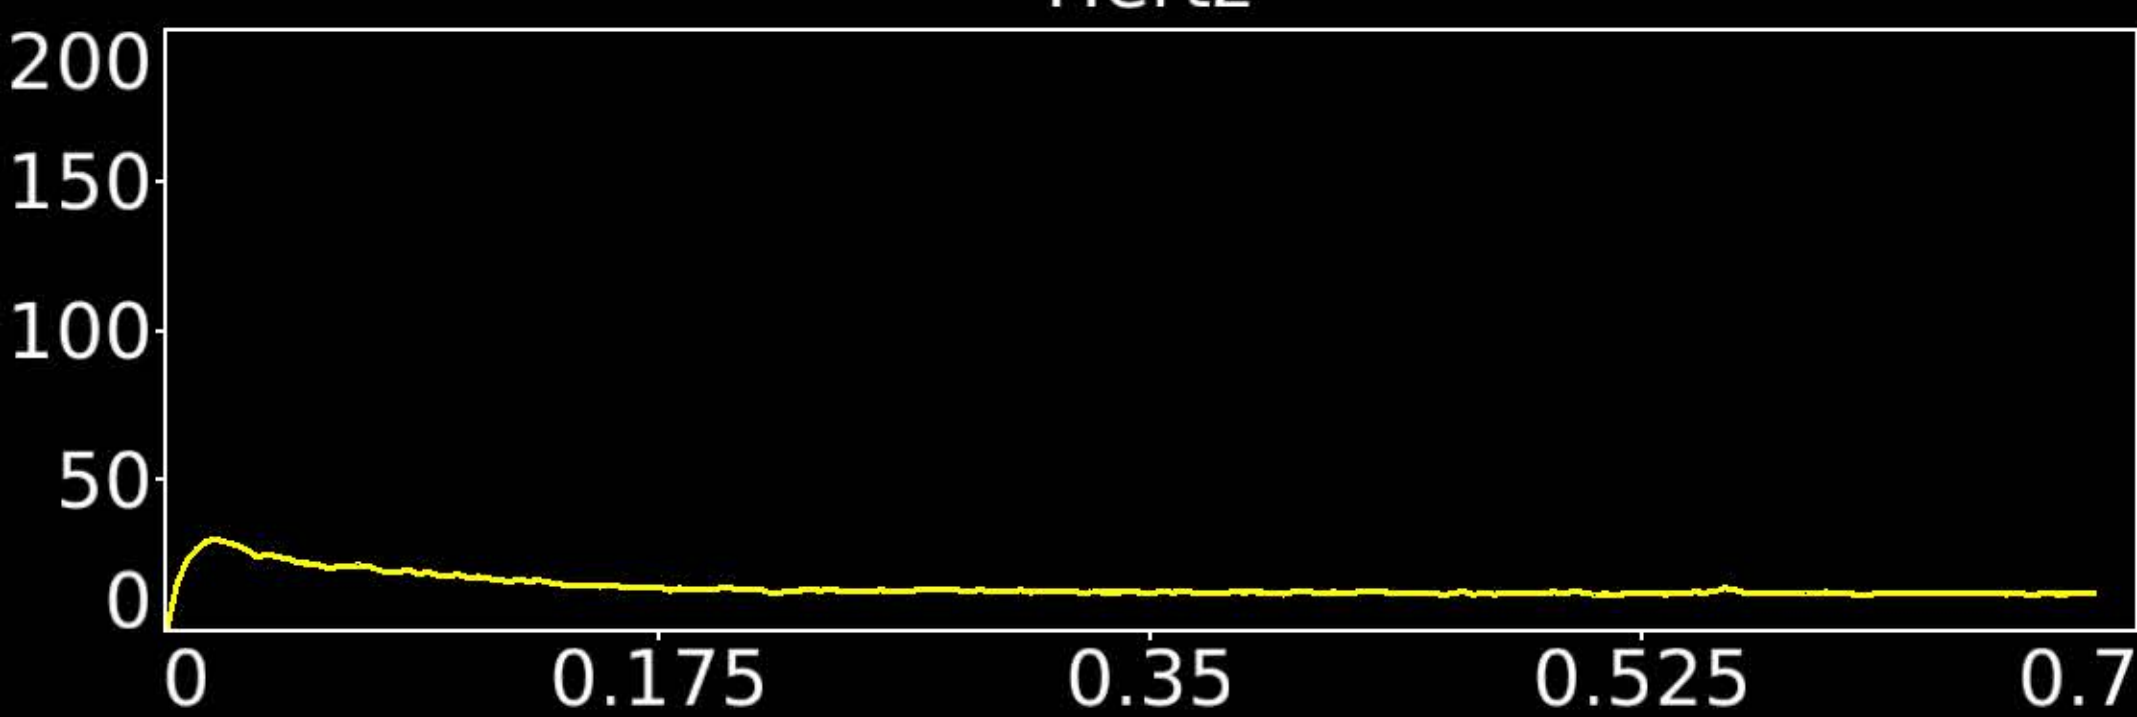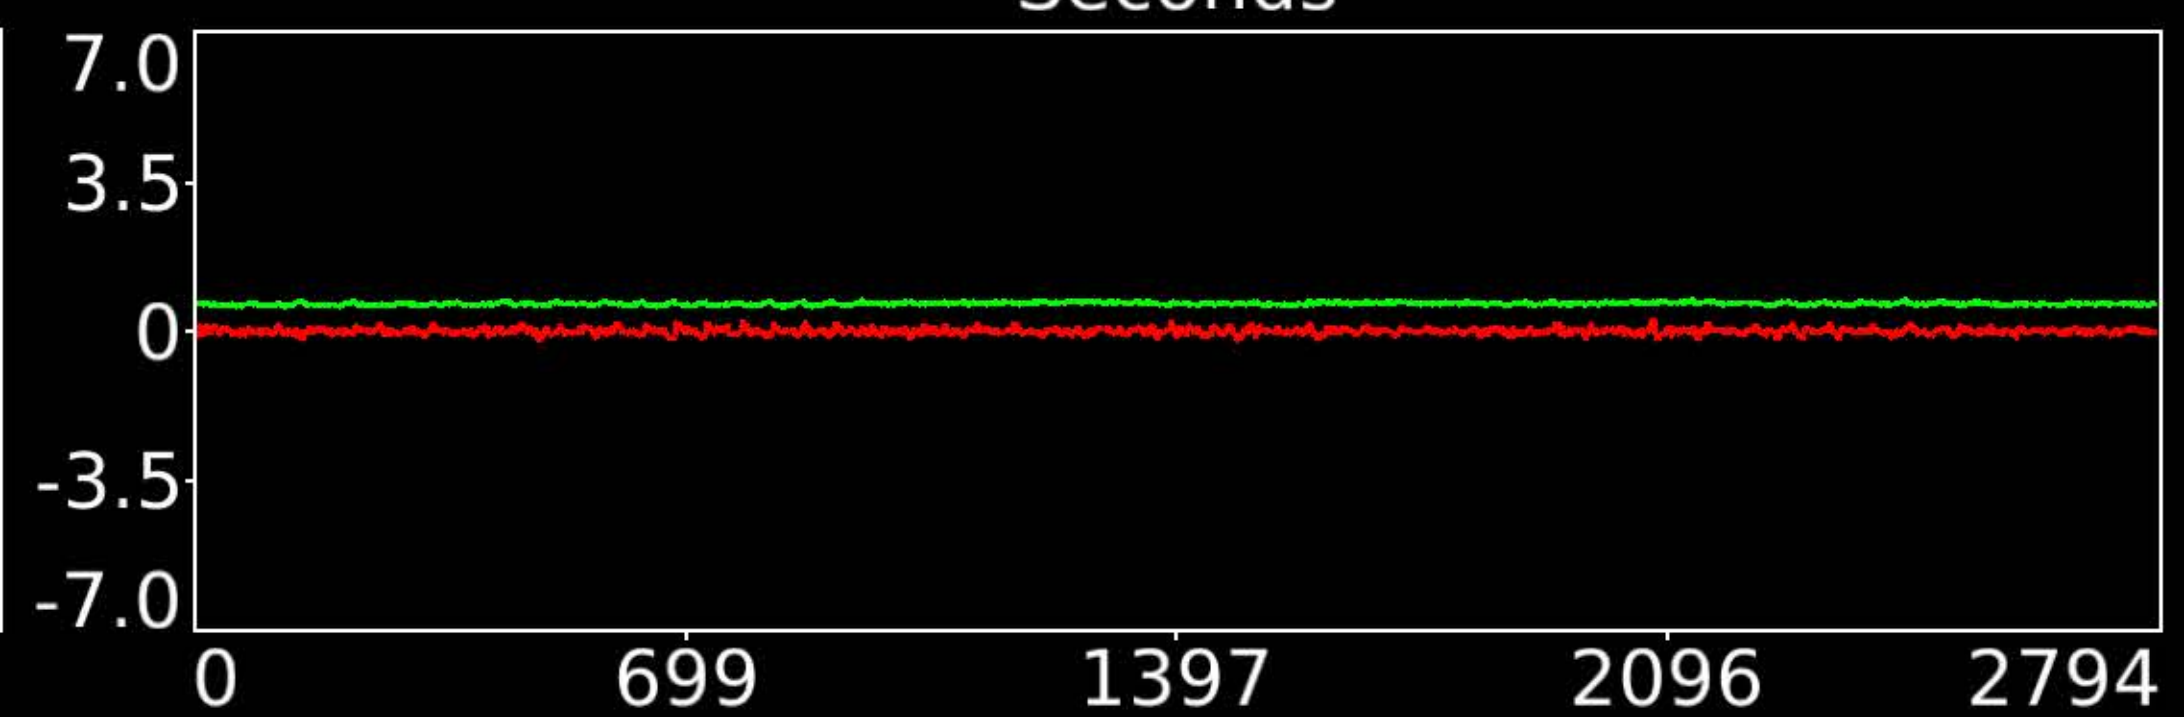

|                                                                                |                            |                                                 |  |
|--------------------------------------------------------------------------------|----------------------------|-------------------------------------------------|--|
| Number & Class: 57 Noise                                                       |                            | Name: Single Subject Global Physiological Noise |  |
| RVT Correlated: No                                                             | DVARS Dip Associated: No   | Cross-Subject Variable: No                      |  |
| Single Subject: Yes                                                            | % Variance Explained: 0.69 | Globality Index: 0.25                           |  |
| Rest Component: No                                                             | Taskr Component: No        | Task Modulated: No                              |  |
| Rationale: Single subject component with high correlation to global timecourse |                            |                                                 |  |



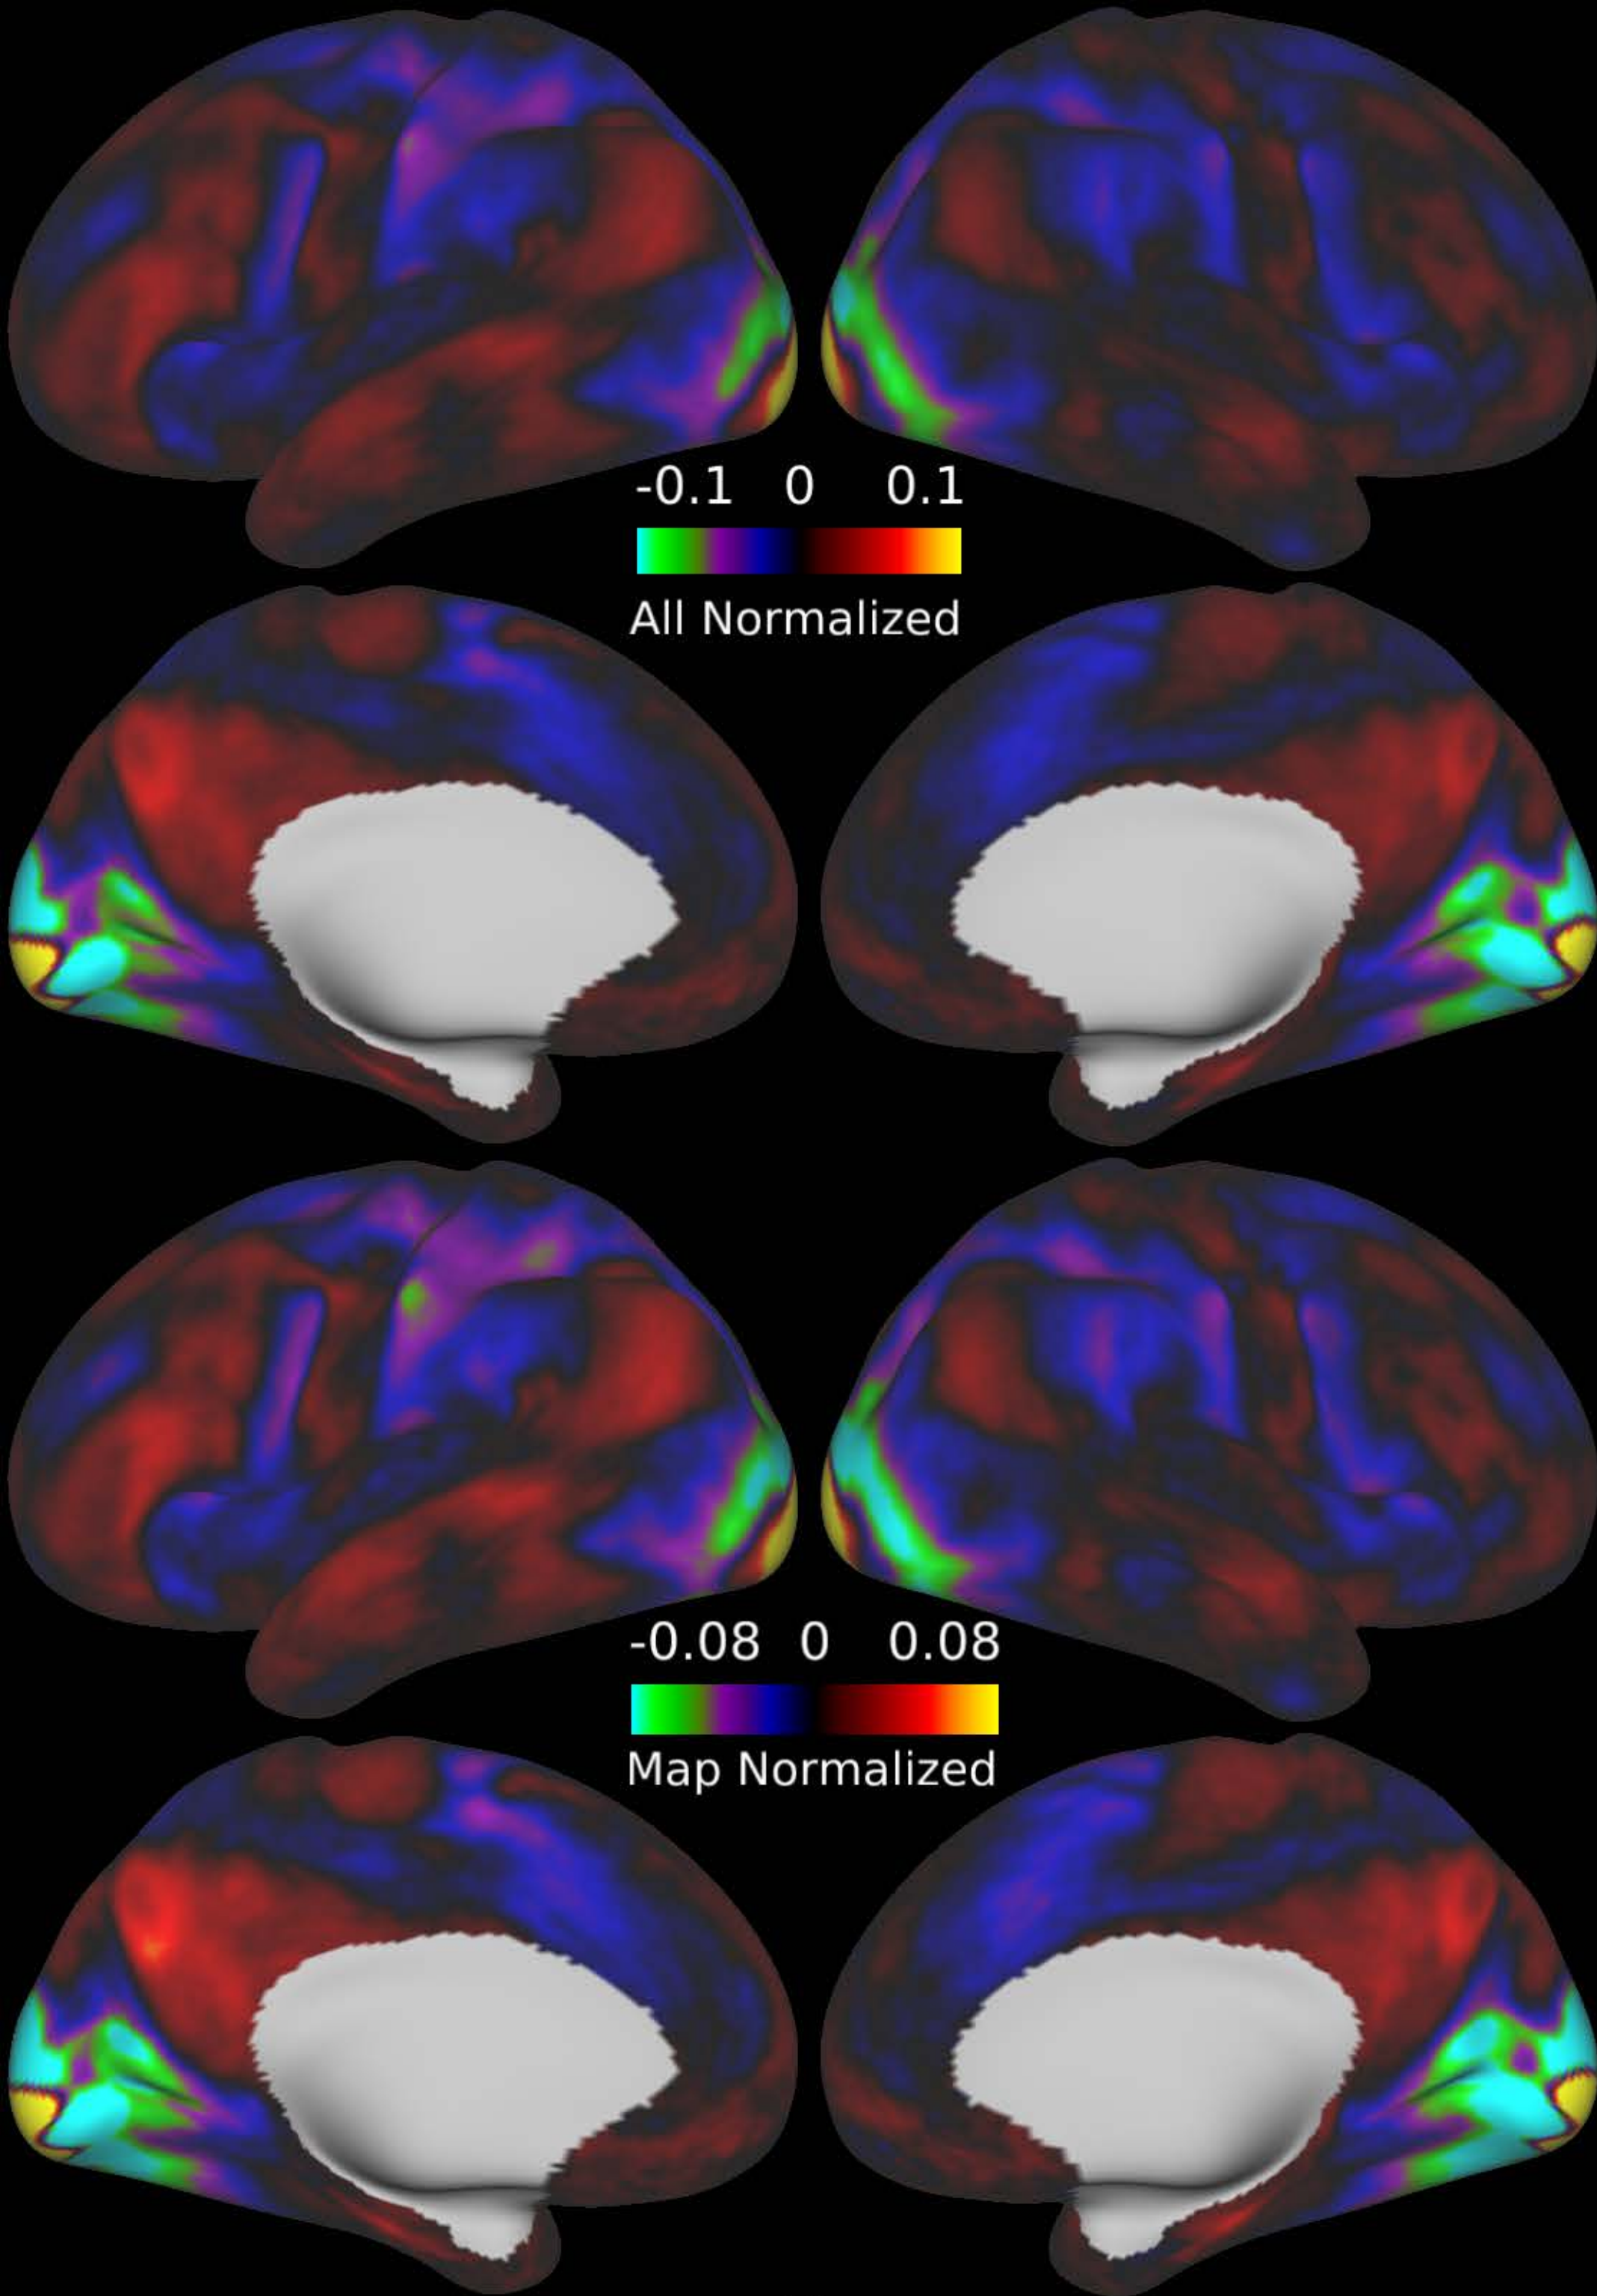

Hertz

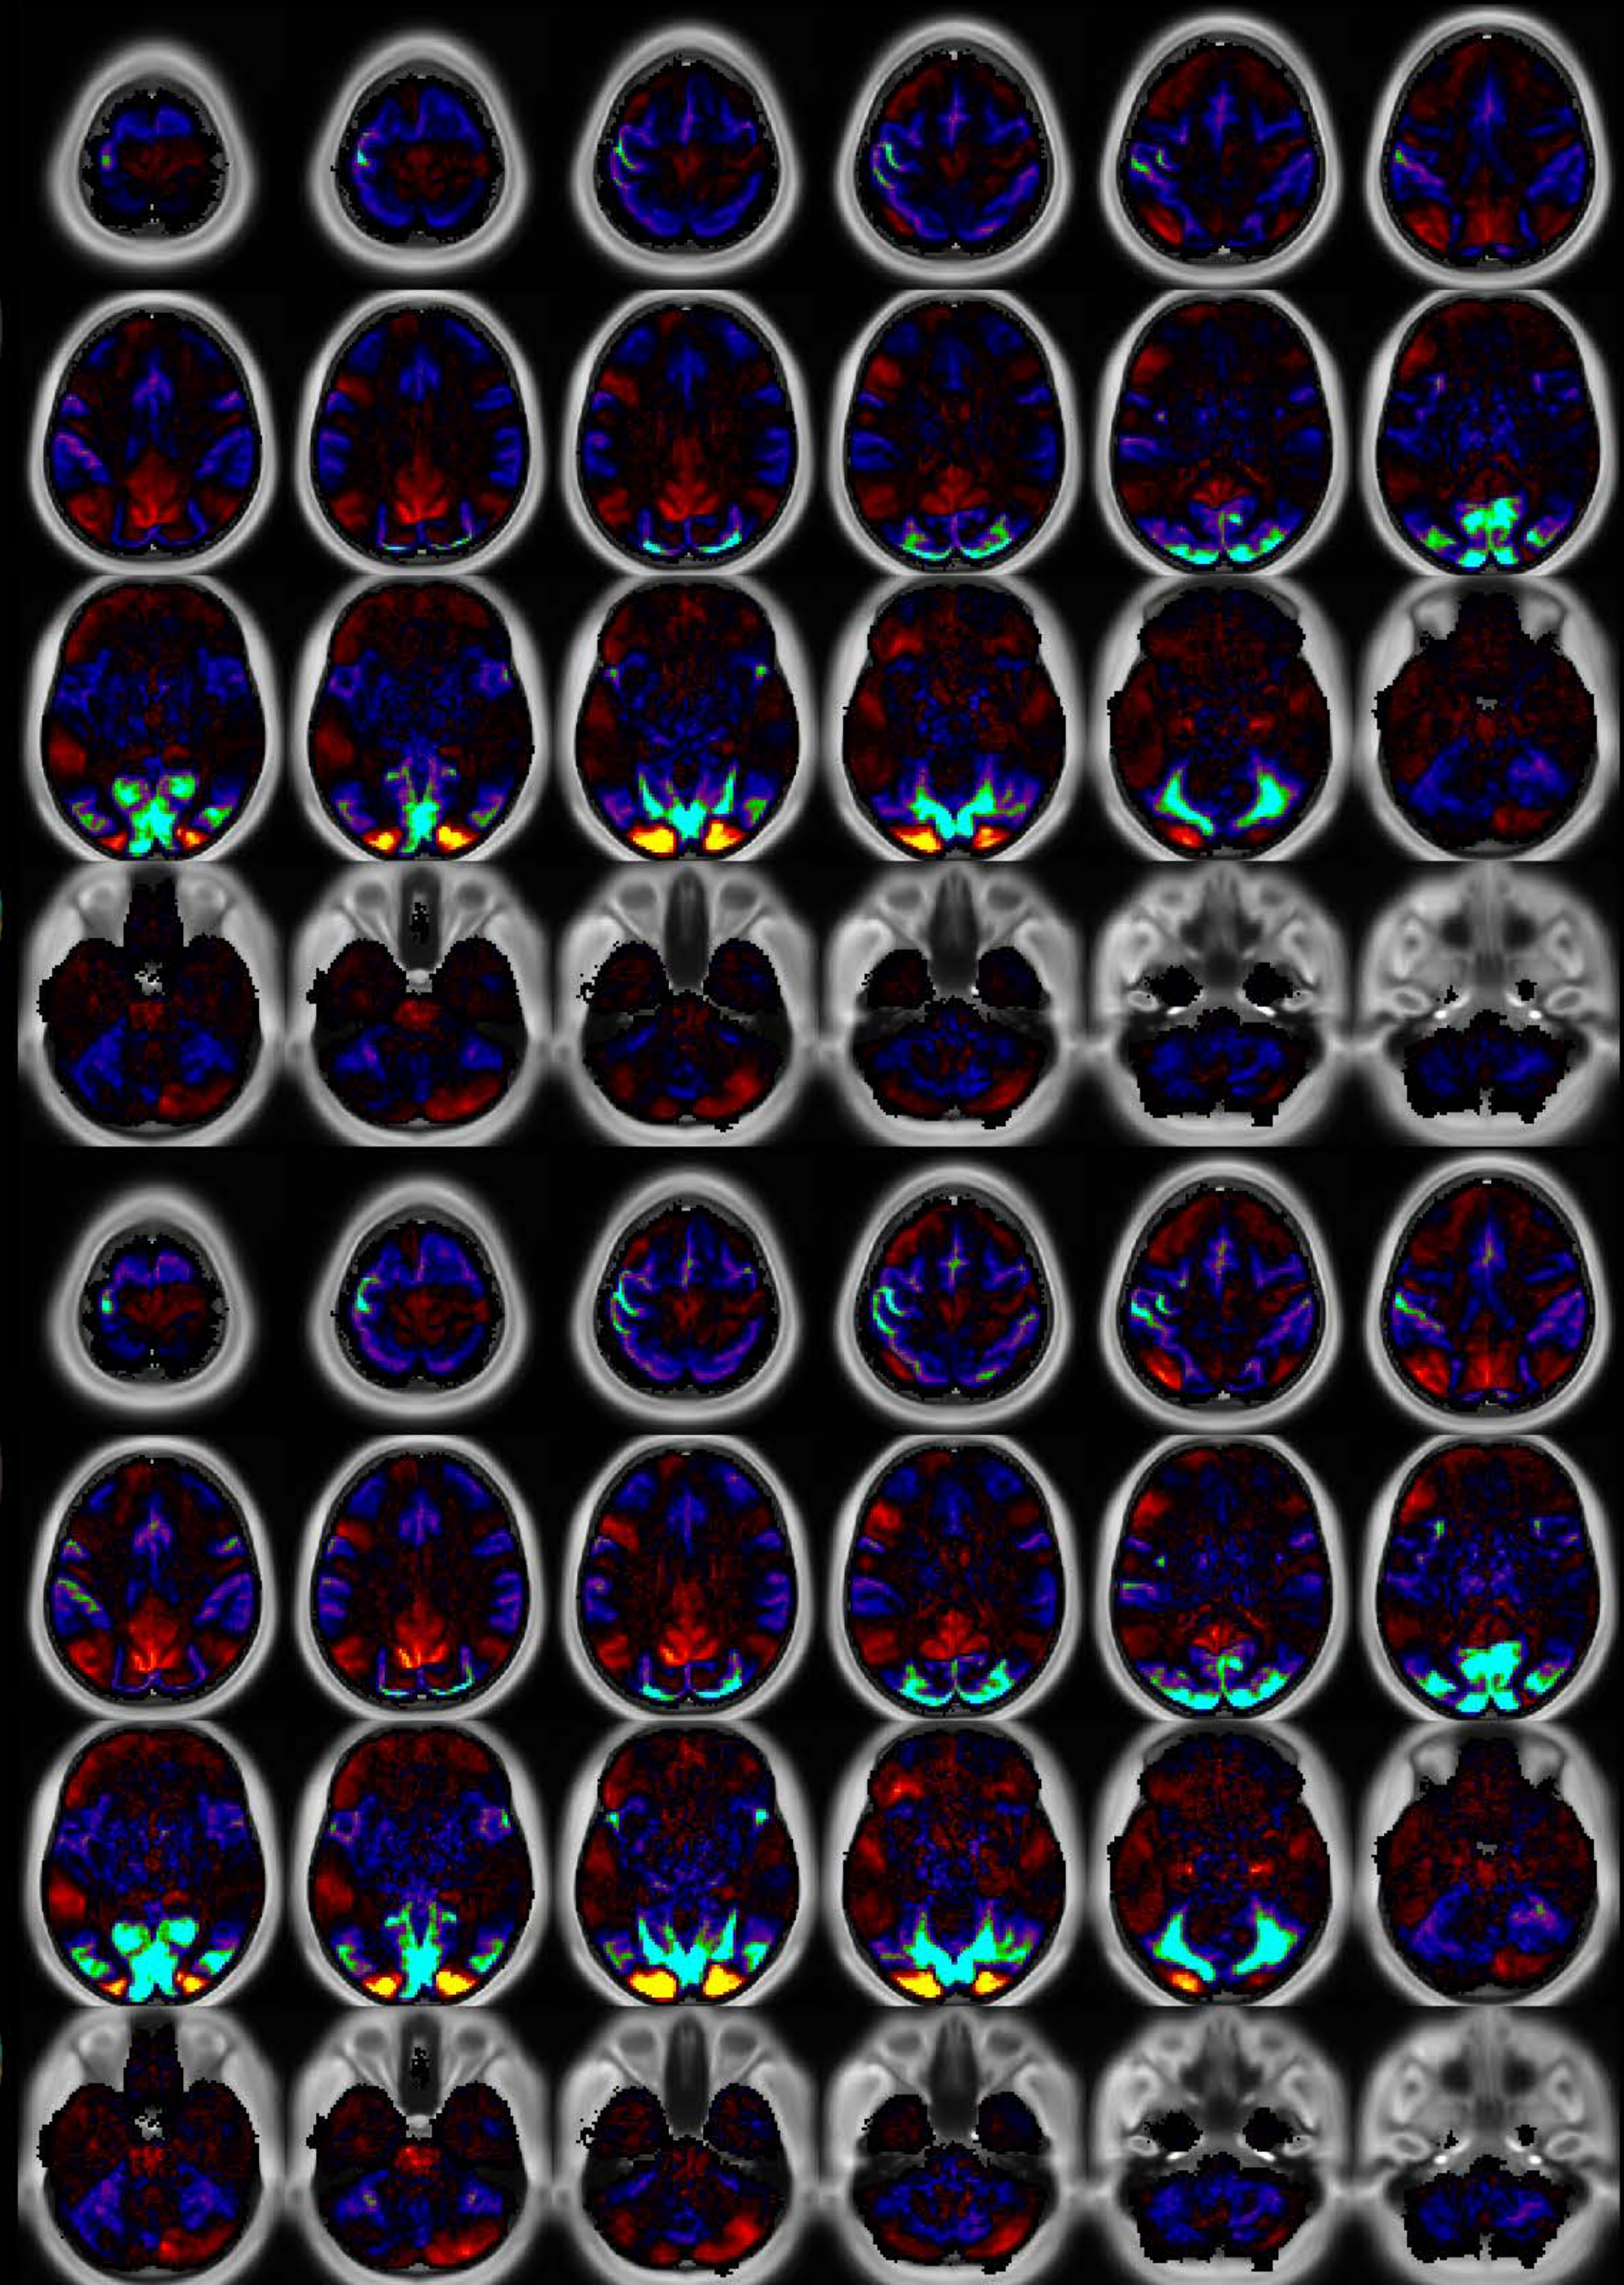

Seconds

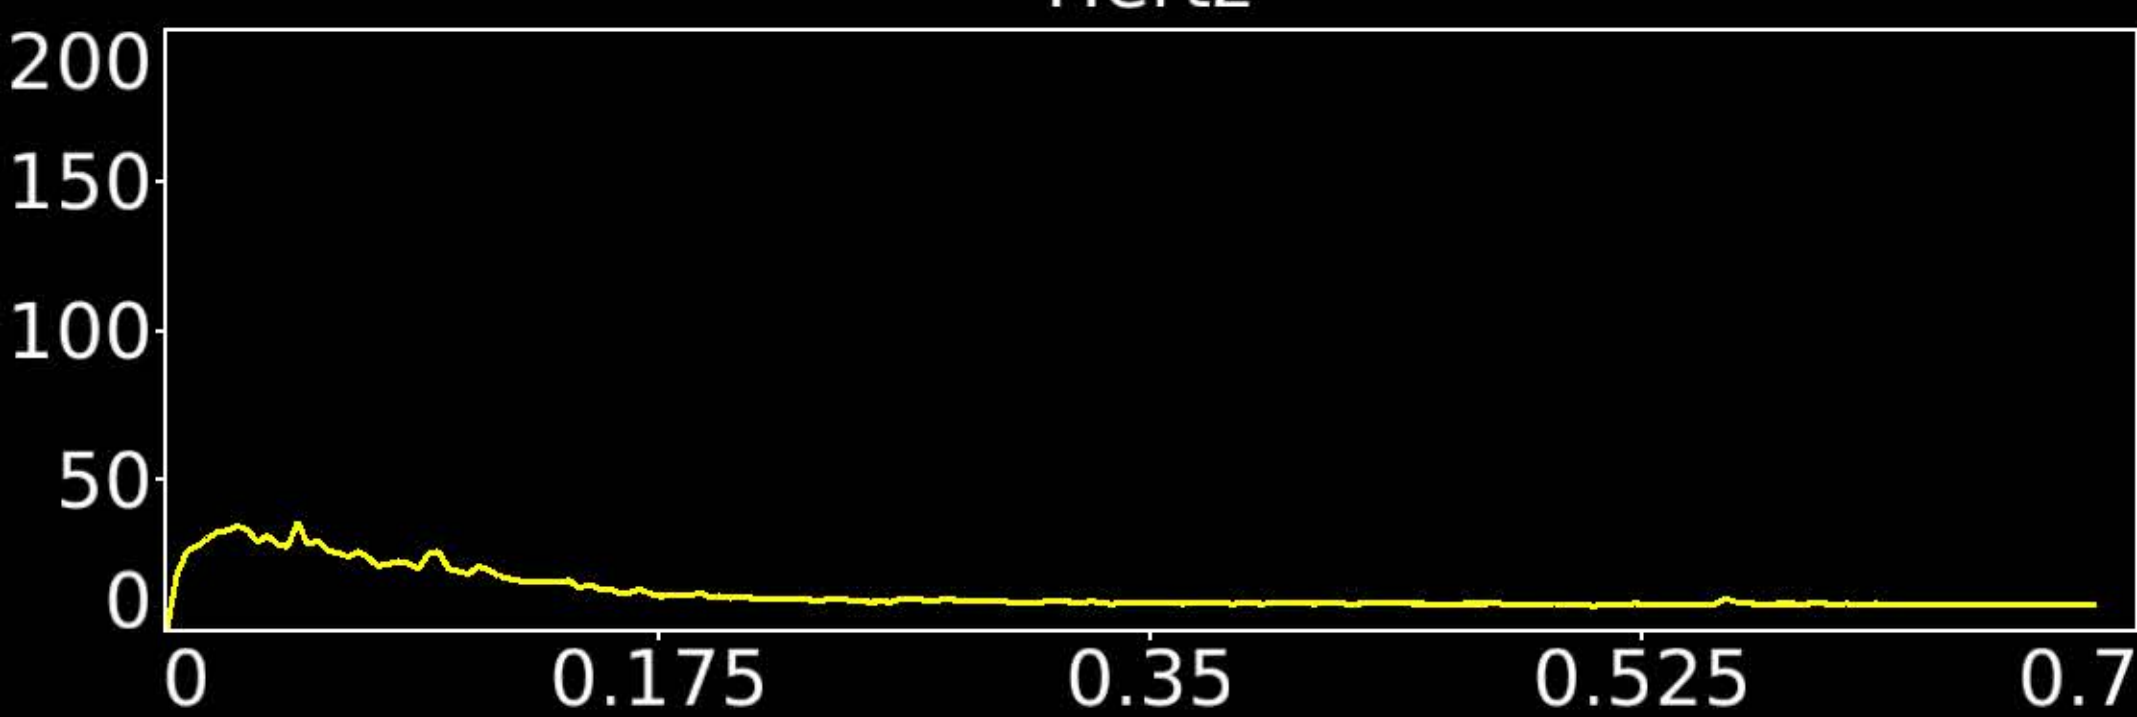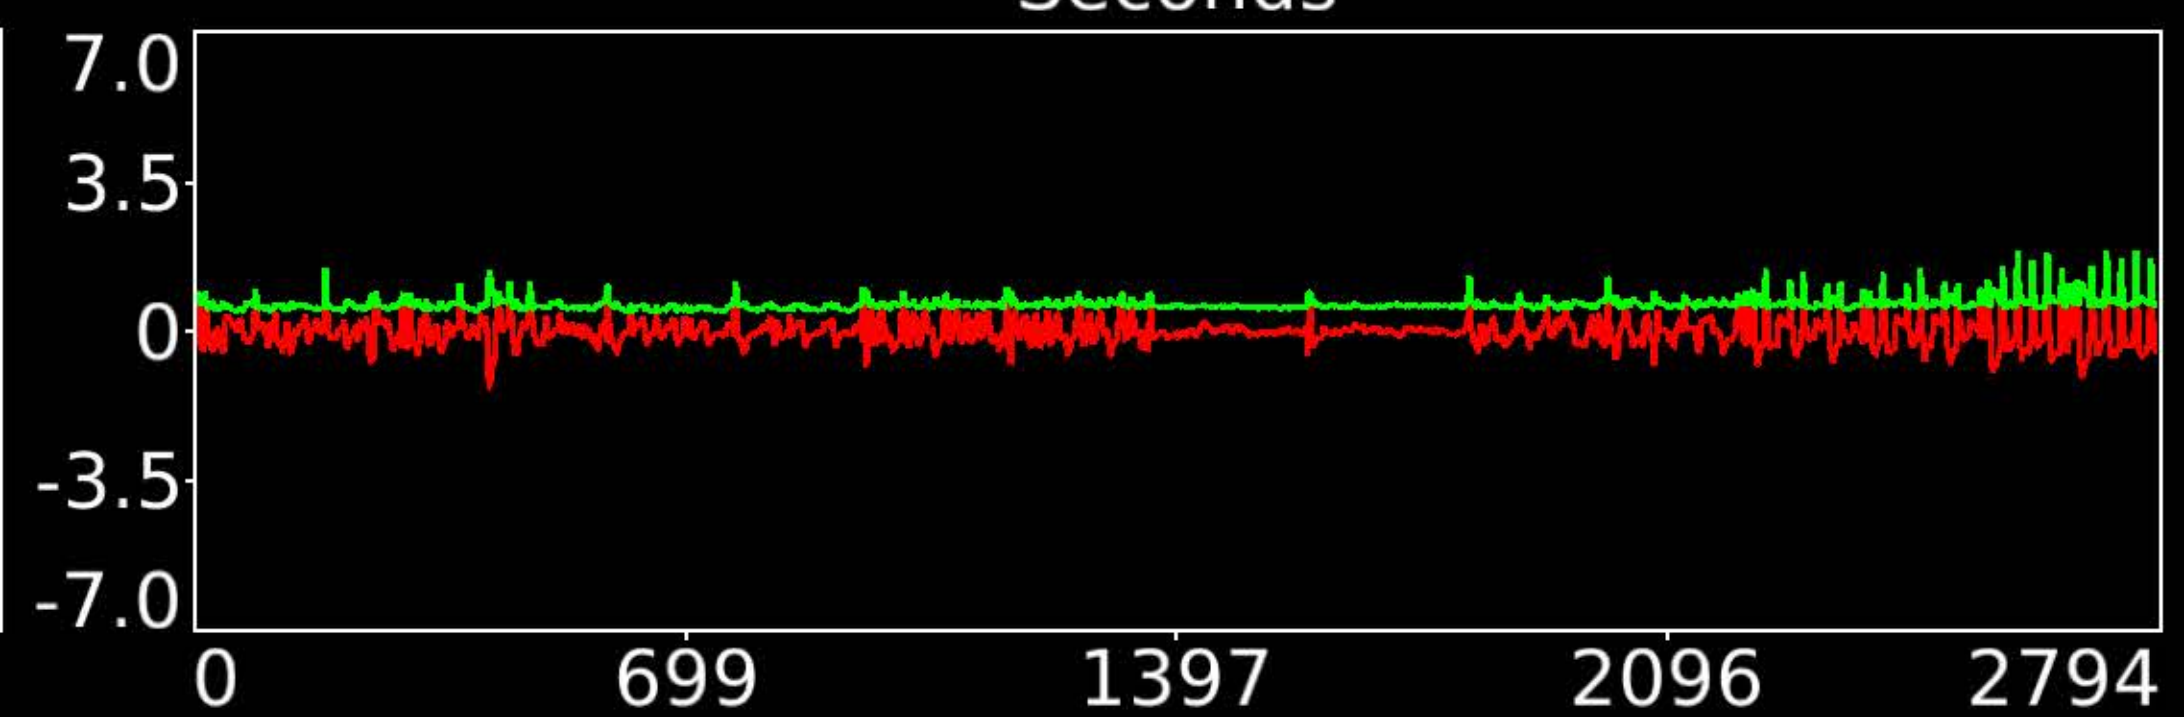

|                                                                                                                                         |                            |                                          |  |
|-----------------------------------------------------------------------------------------------------------------------------------------|----------------------------|------------------------------------------|--|
| Number & Class: 58 Signal                                                                                                               |                            | Name: Complex Foveal > Peripheral Visual |  |
| RVT Correlated: No                                                                                                                      | DVARS Dip Associated: No   | Cross-Subject Variable: No               |  |
| Single Subject: No                                                                                                                      | % Variance Explained: 0.69 | Globality Index: 0.37                    |  |
| Rest Component: No                                                                                                                      | Taskr Component: No        | Task Modulated: Emotion                  |  |
| Rationale: Spatial map includes positive and negative patches that respect known retinotopic visual organization (Foveal vs Peripheral) |                            |                                          |  |



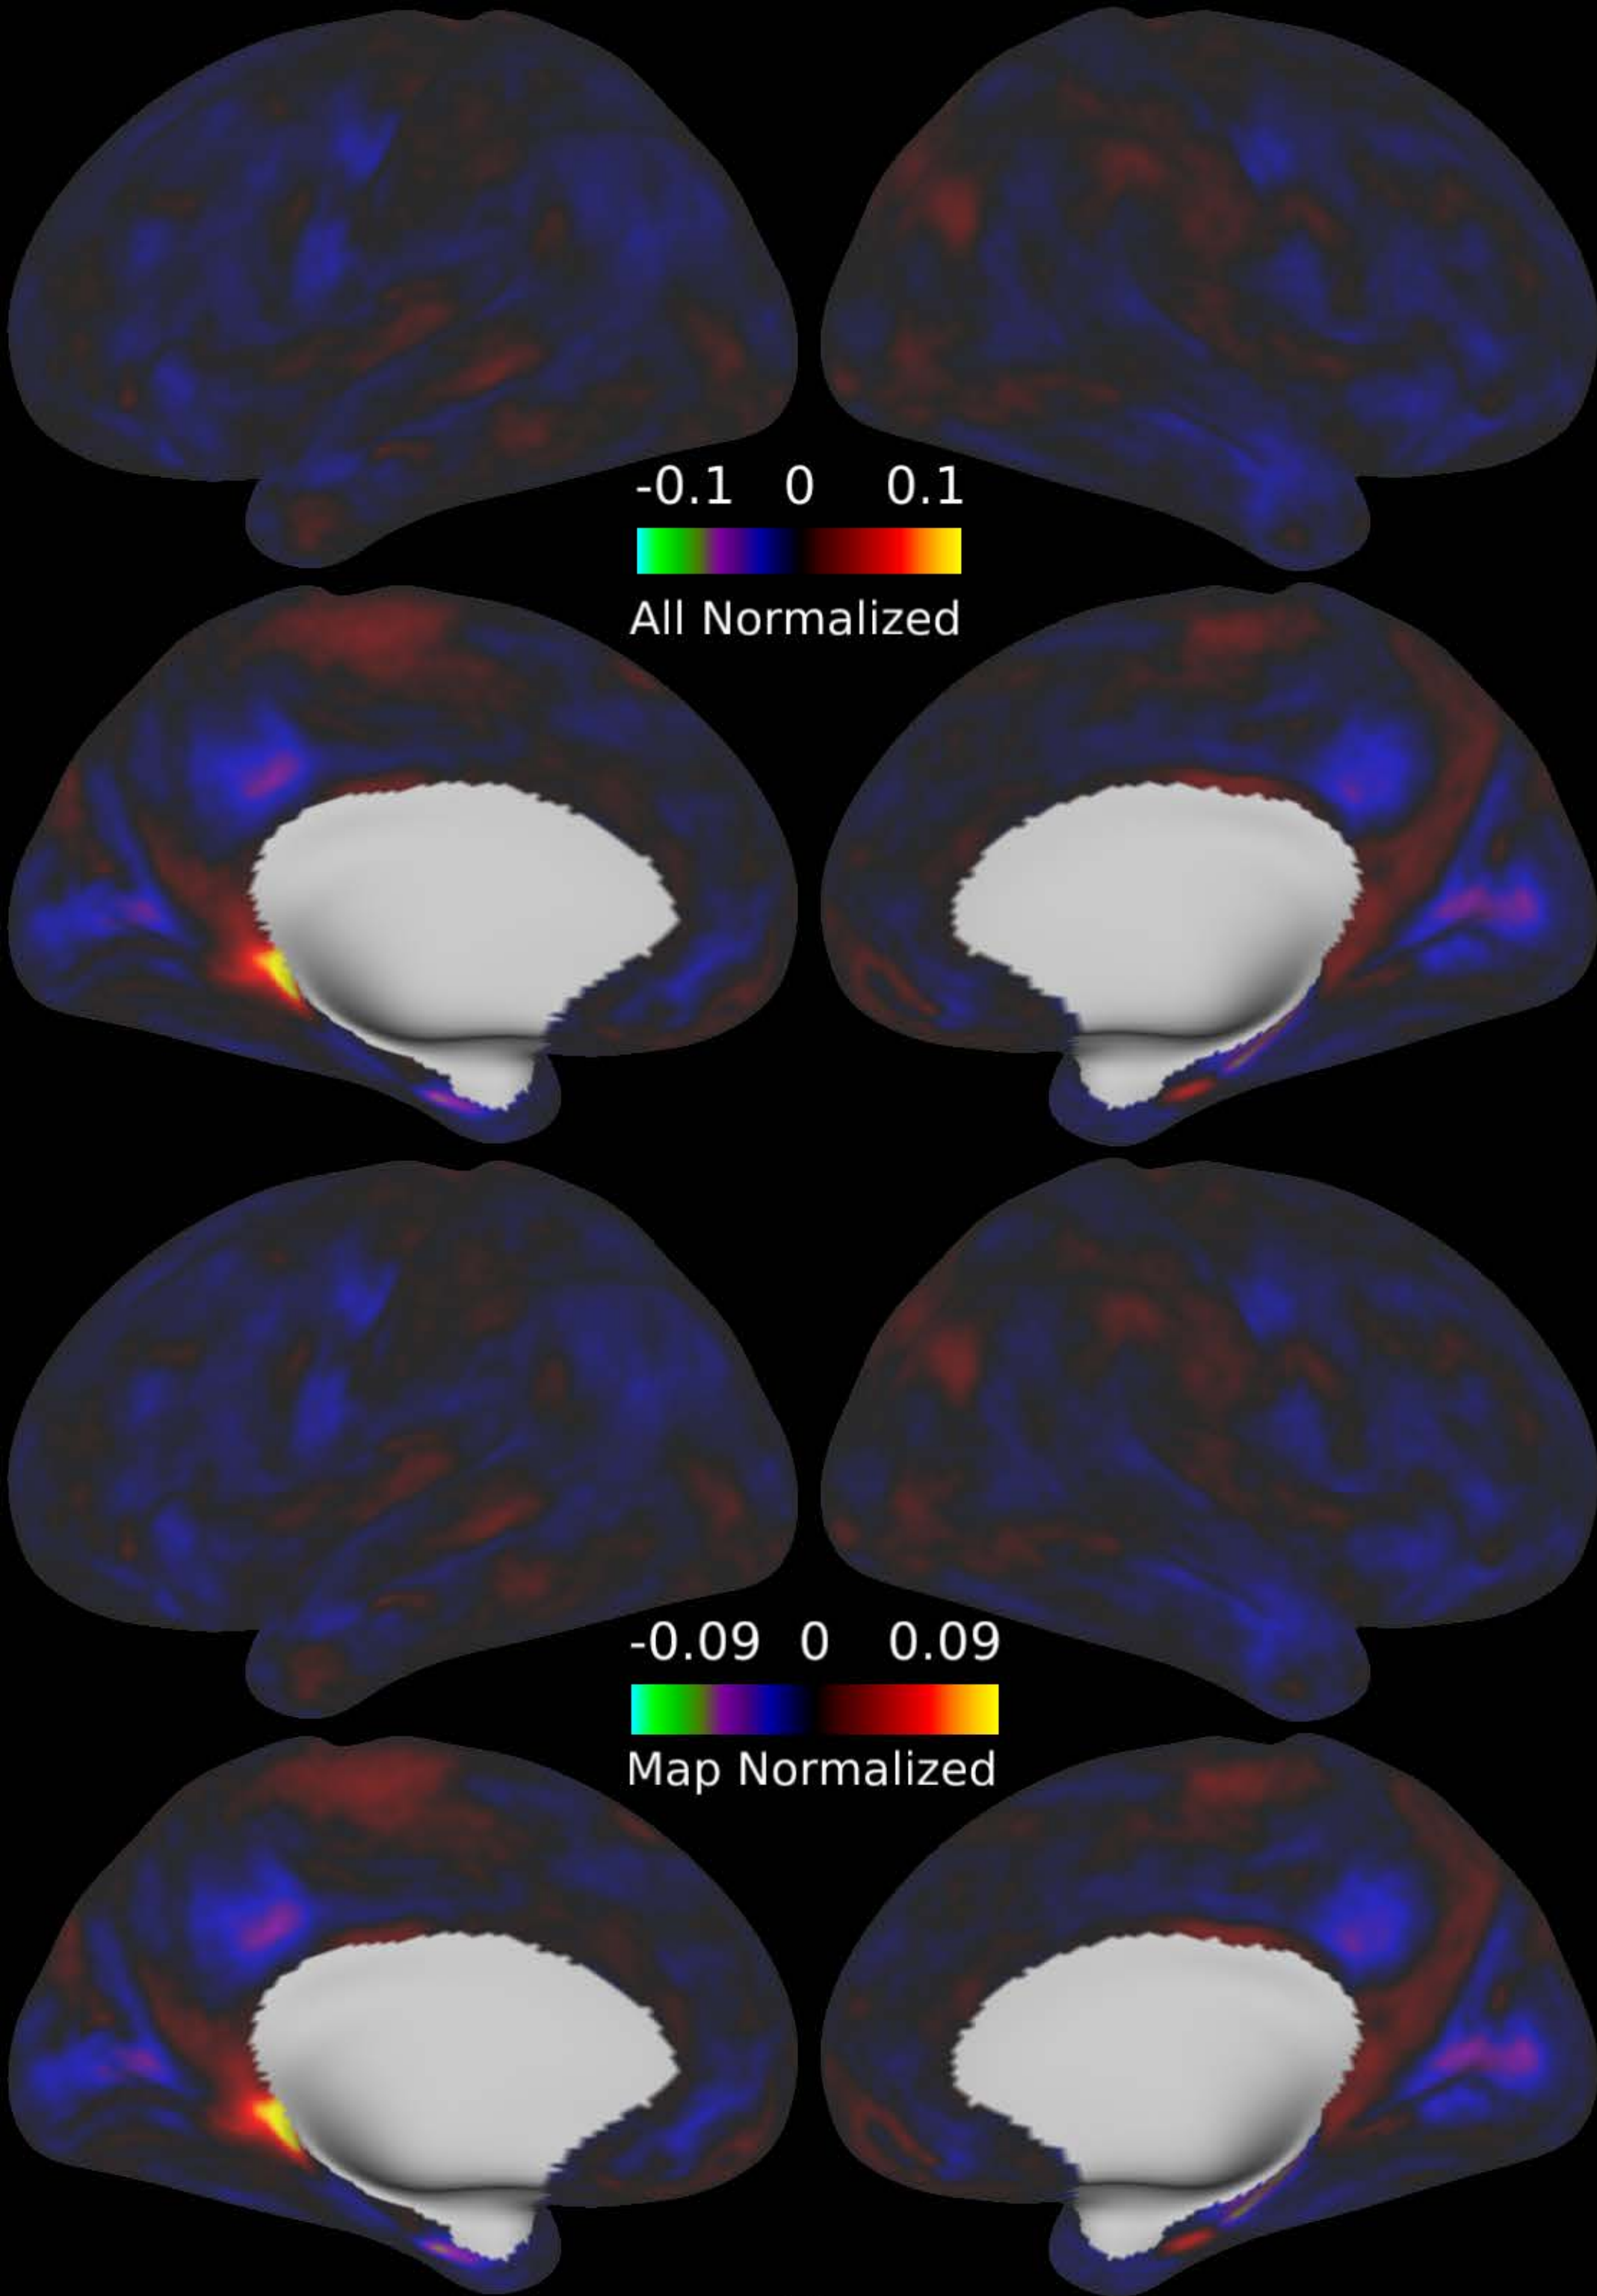

Hertz

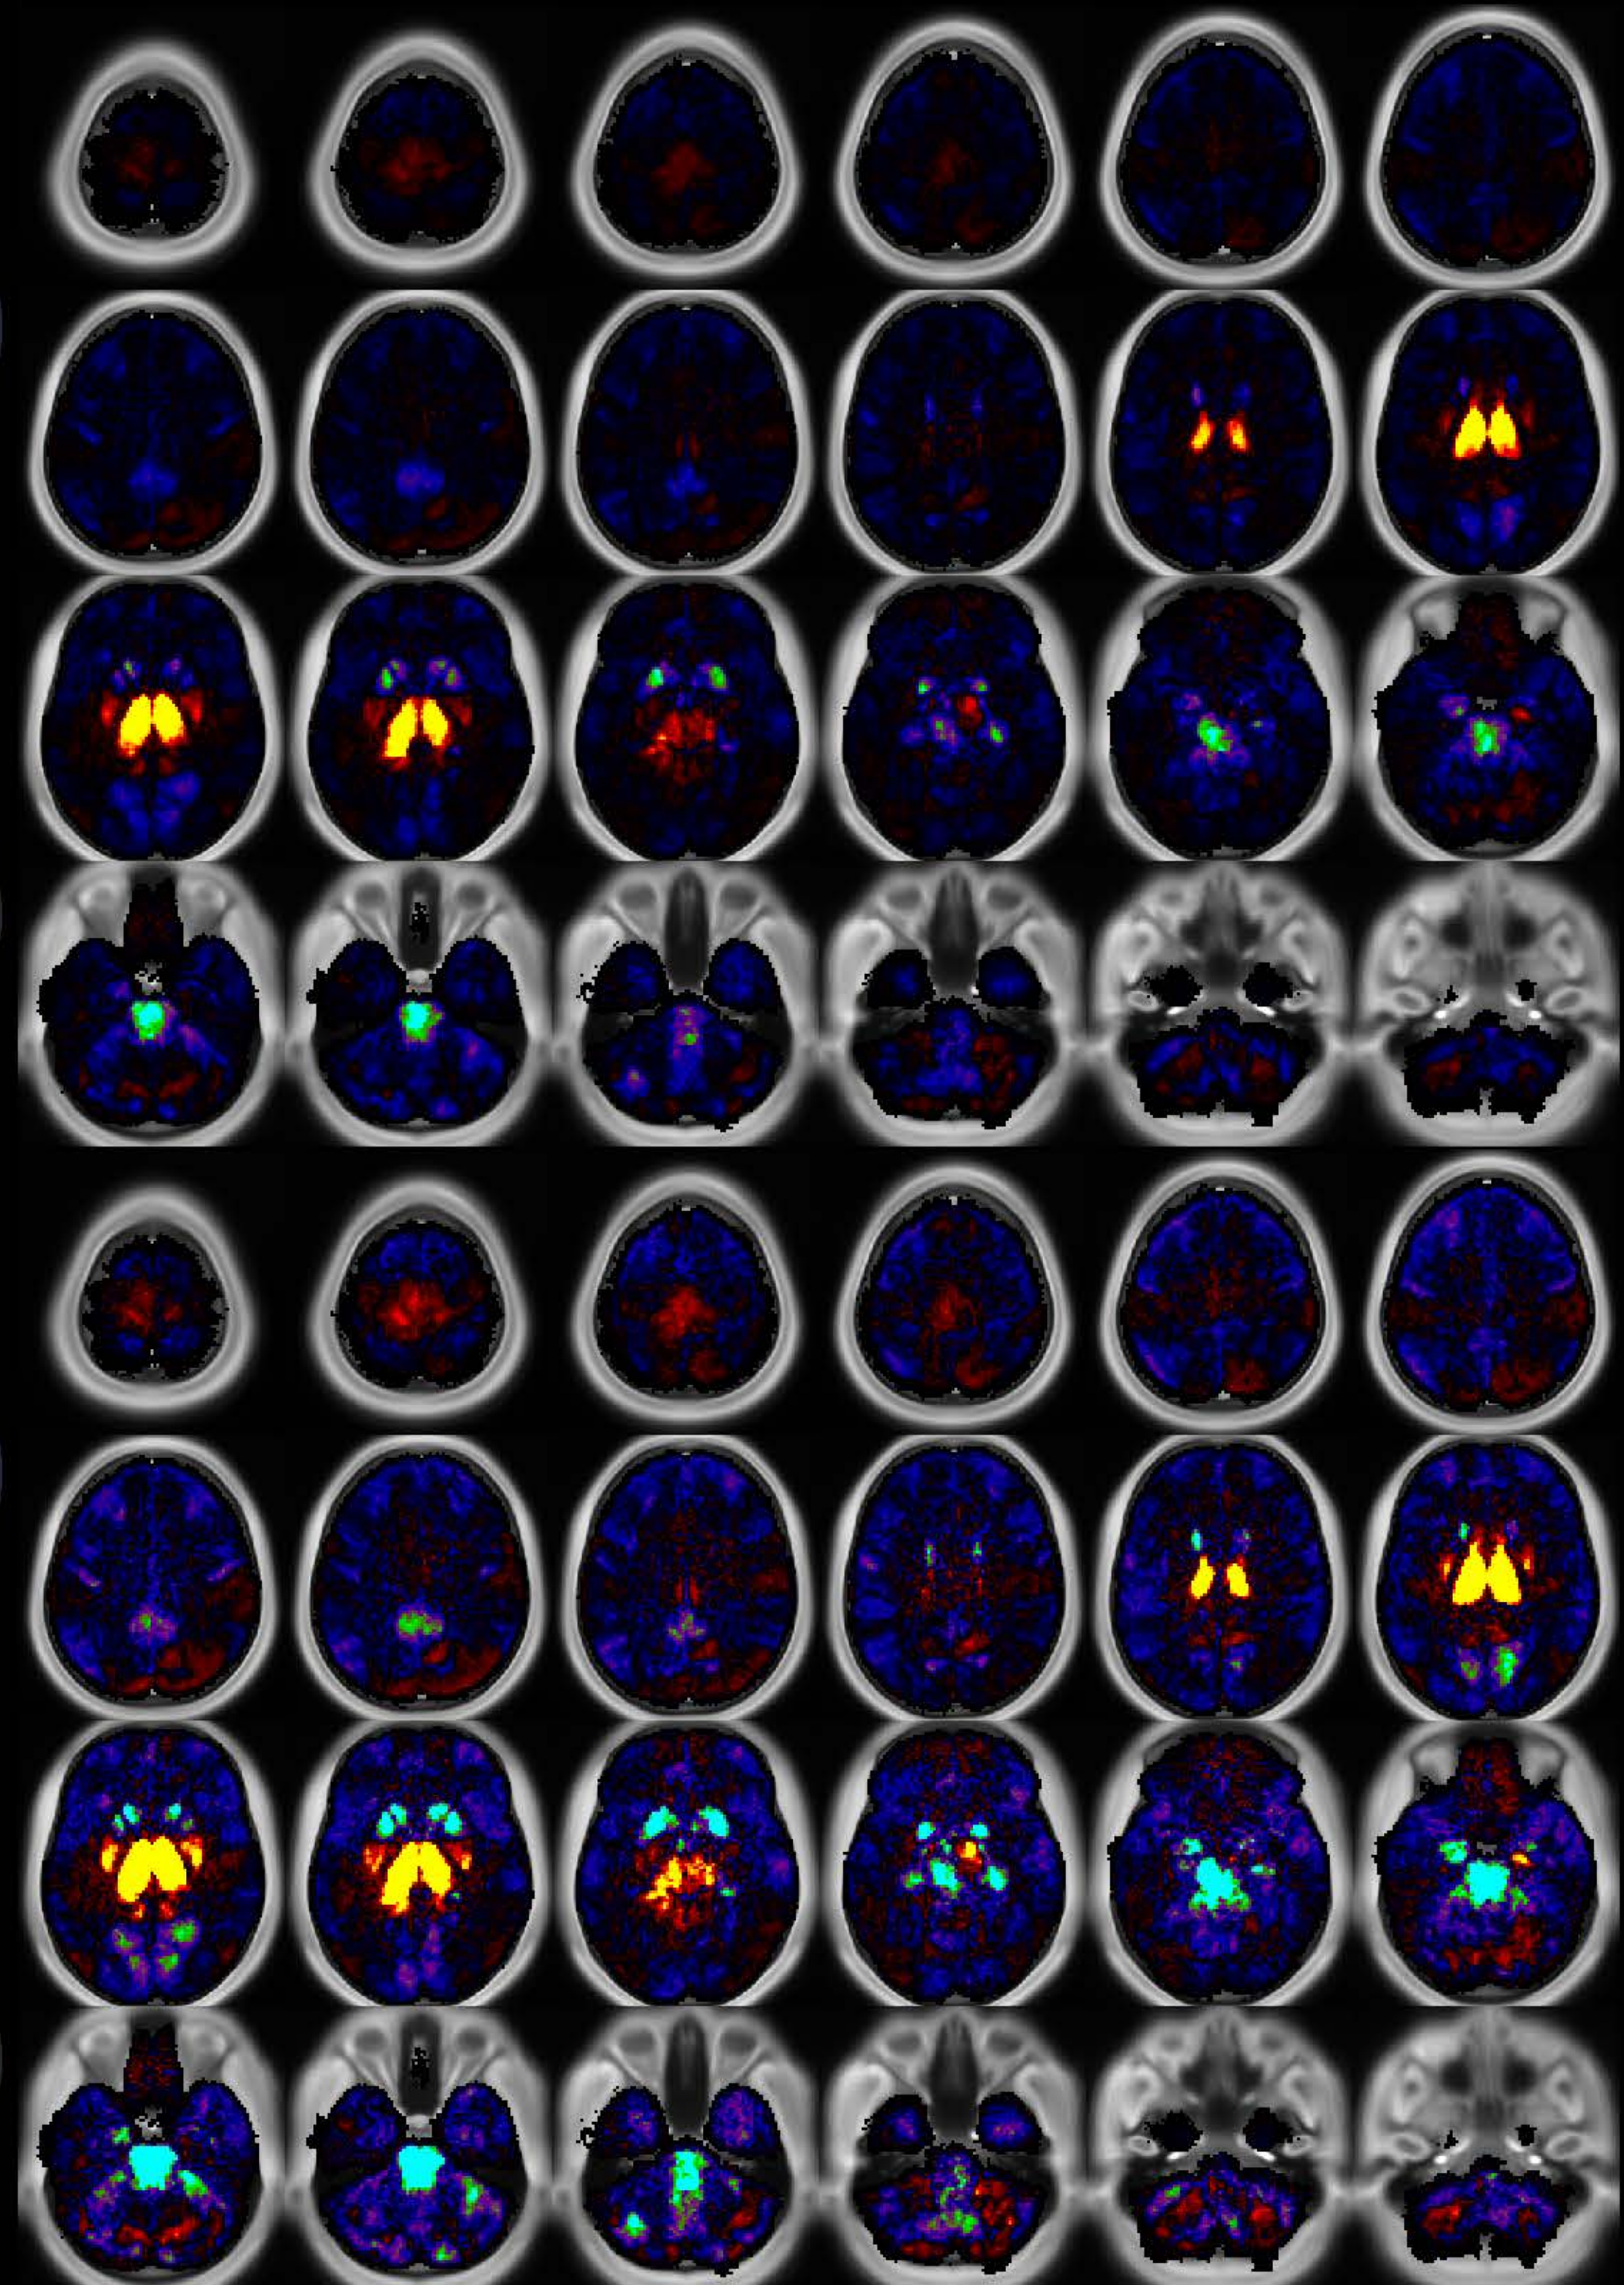

Seconds

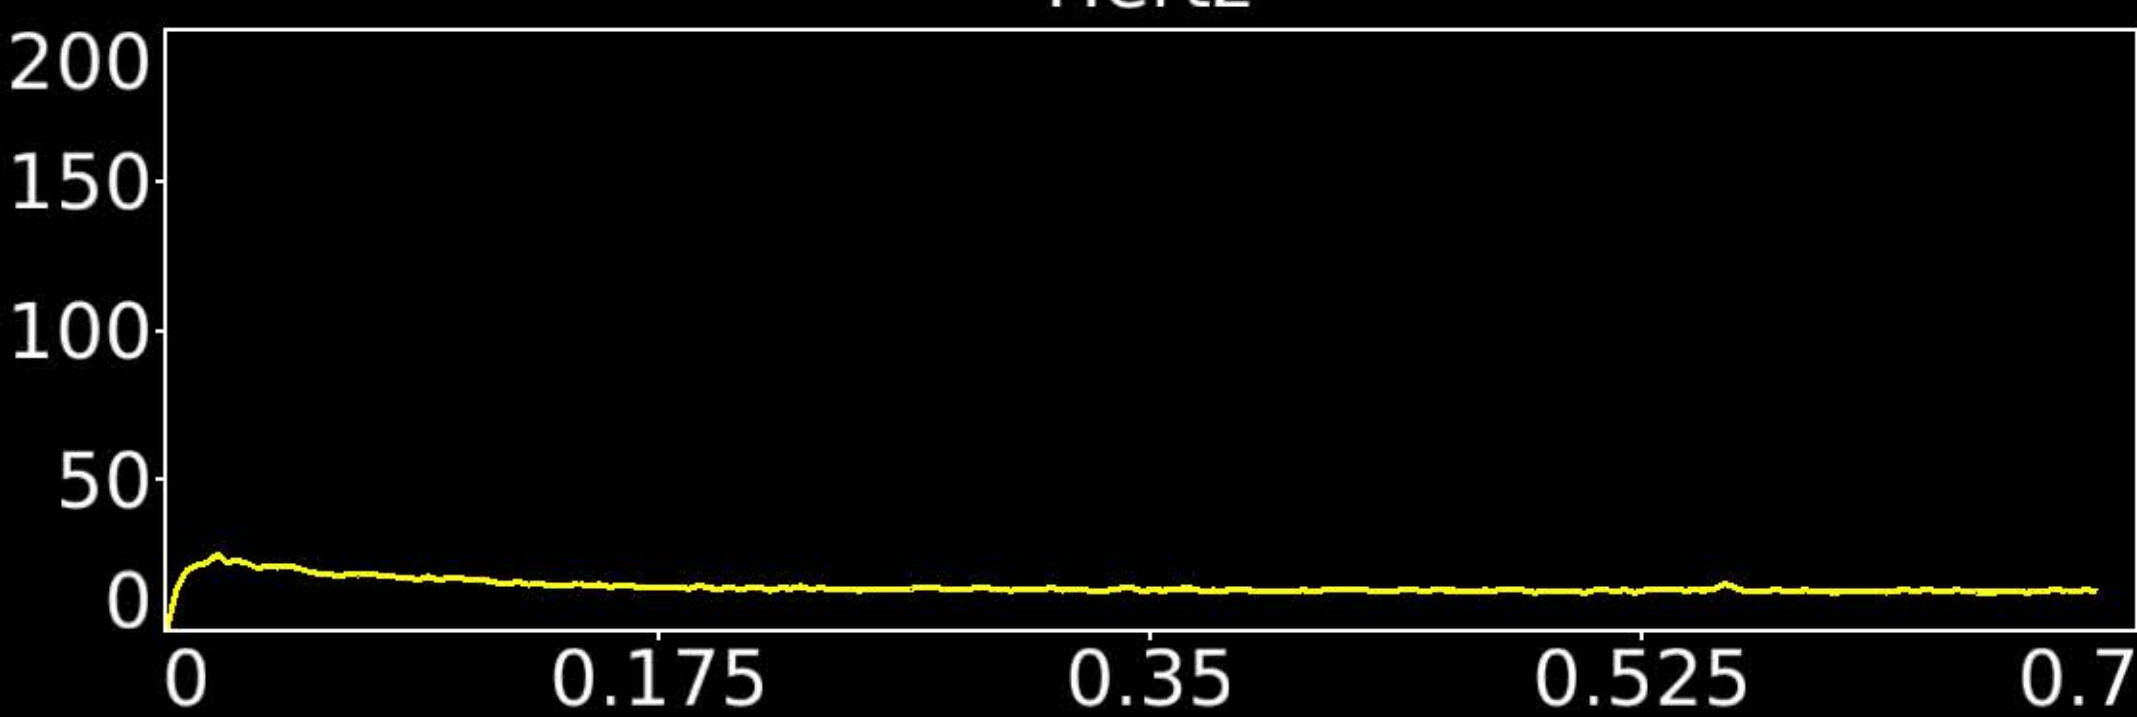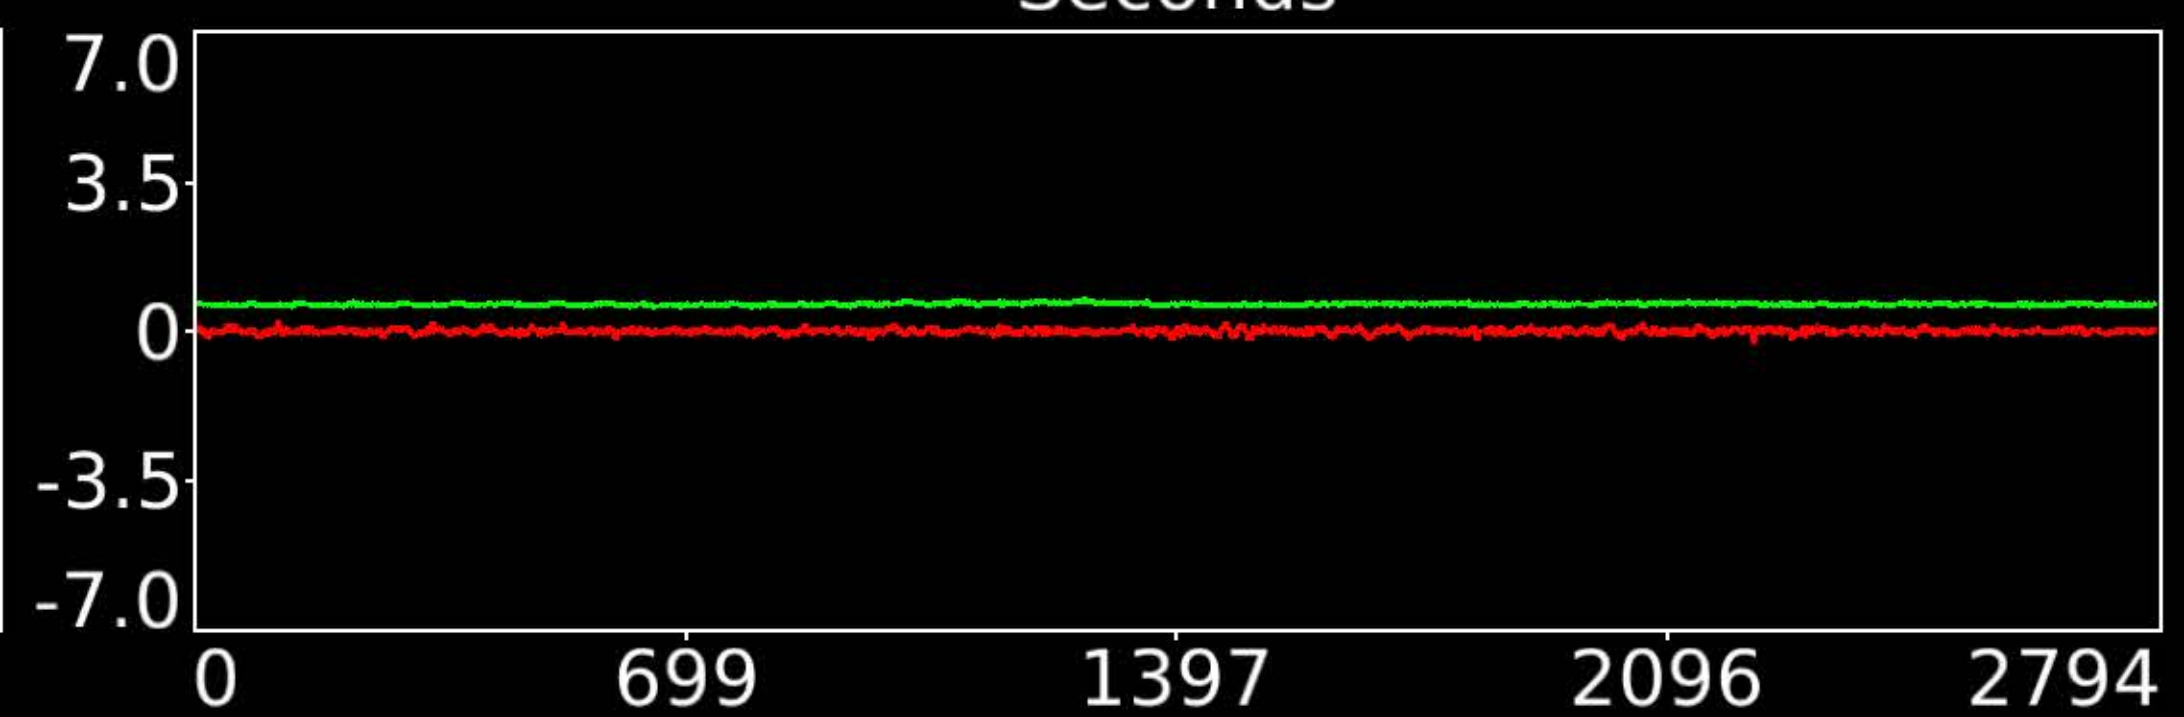

|                          |                            |                            |  |
|--------------------------|----------------------------|----------------------------|--|
| Number & Class: 59 Noise |                            | Name: Bilateral Thalamus   |  |
| RVT Correlated: No       | DVARS Dip Associated: No   | Cross-Subject Variable: No |  |
| Single Subject: No       | % Variance Explained: 0.66 | Globality Index: 1.13      |  |
| Rest Component: No       | Taskr Component: No        | Task Modulated: No         |  |

Rationale: Controversial: Variance correlated with other noise components; spatial map not reflective of known RSNs or areal boundaries



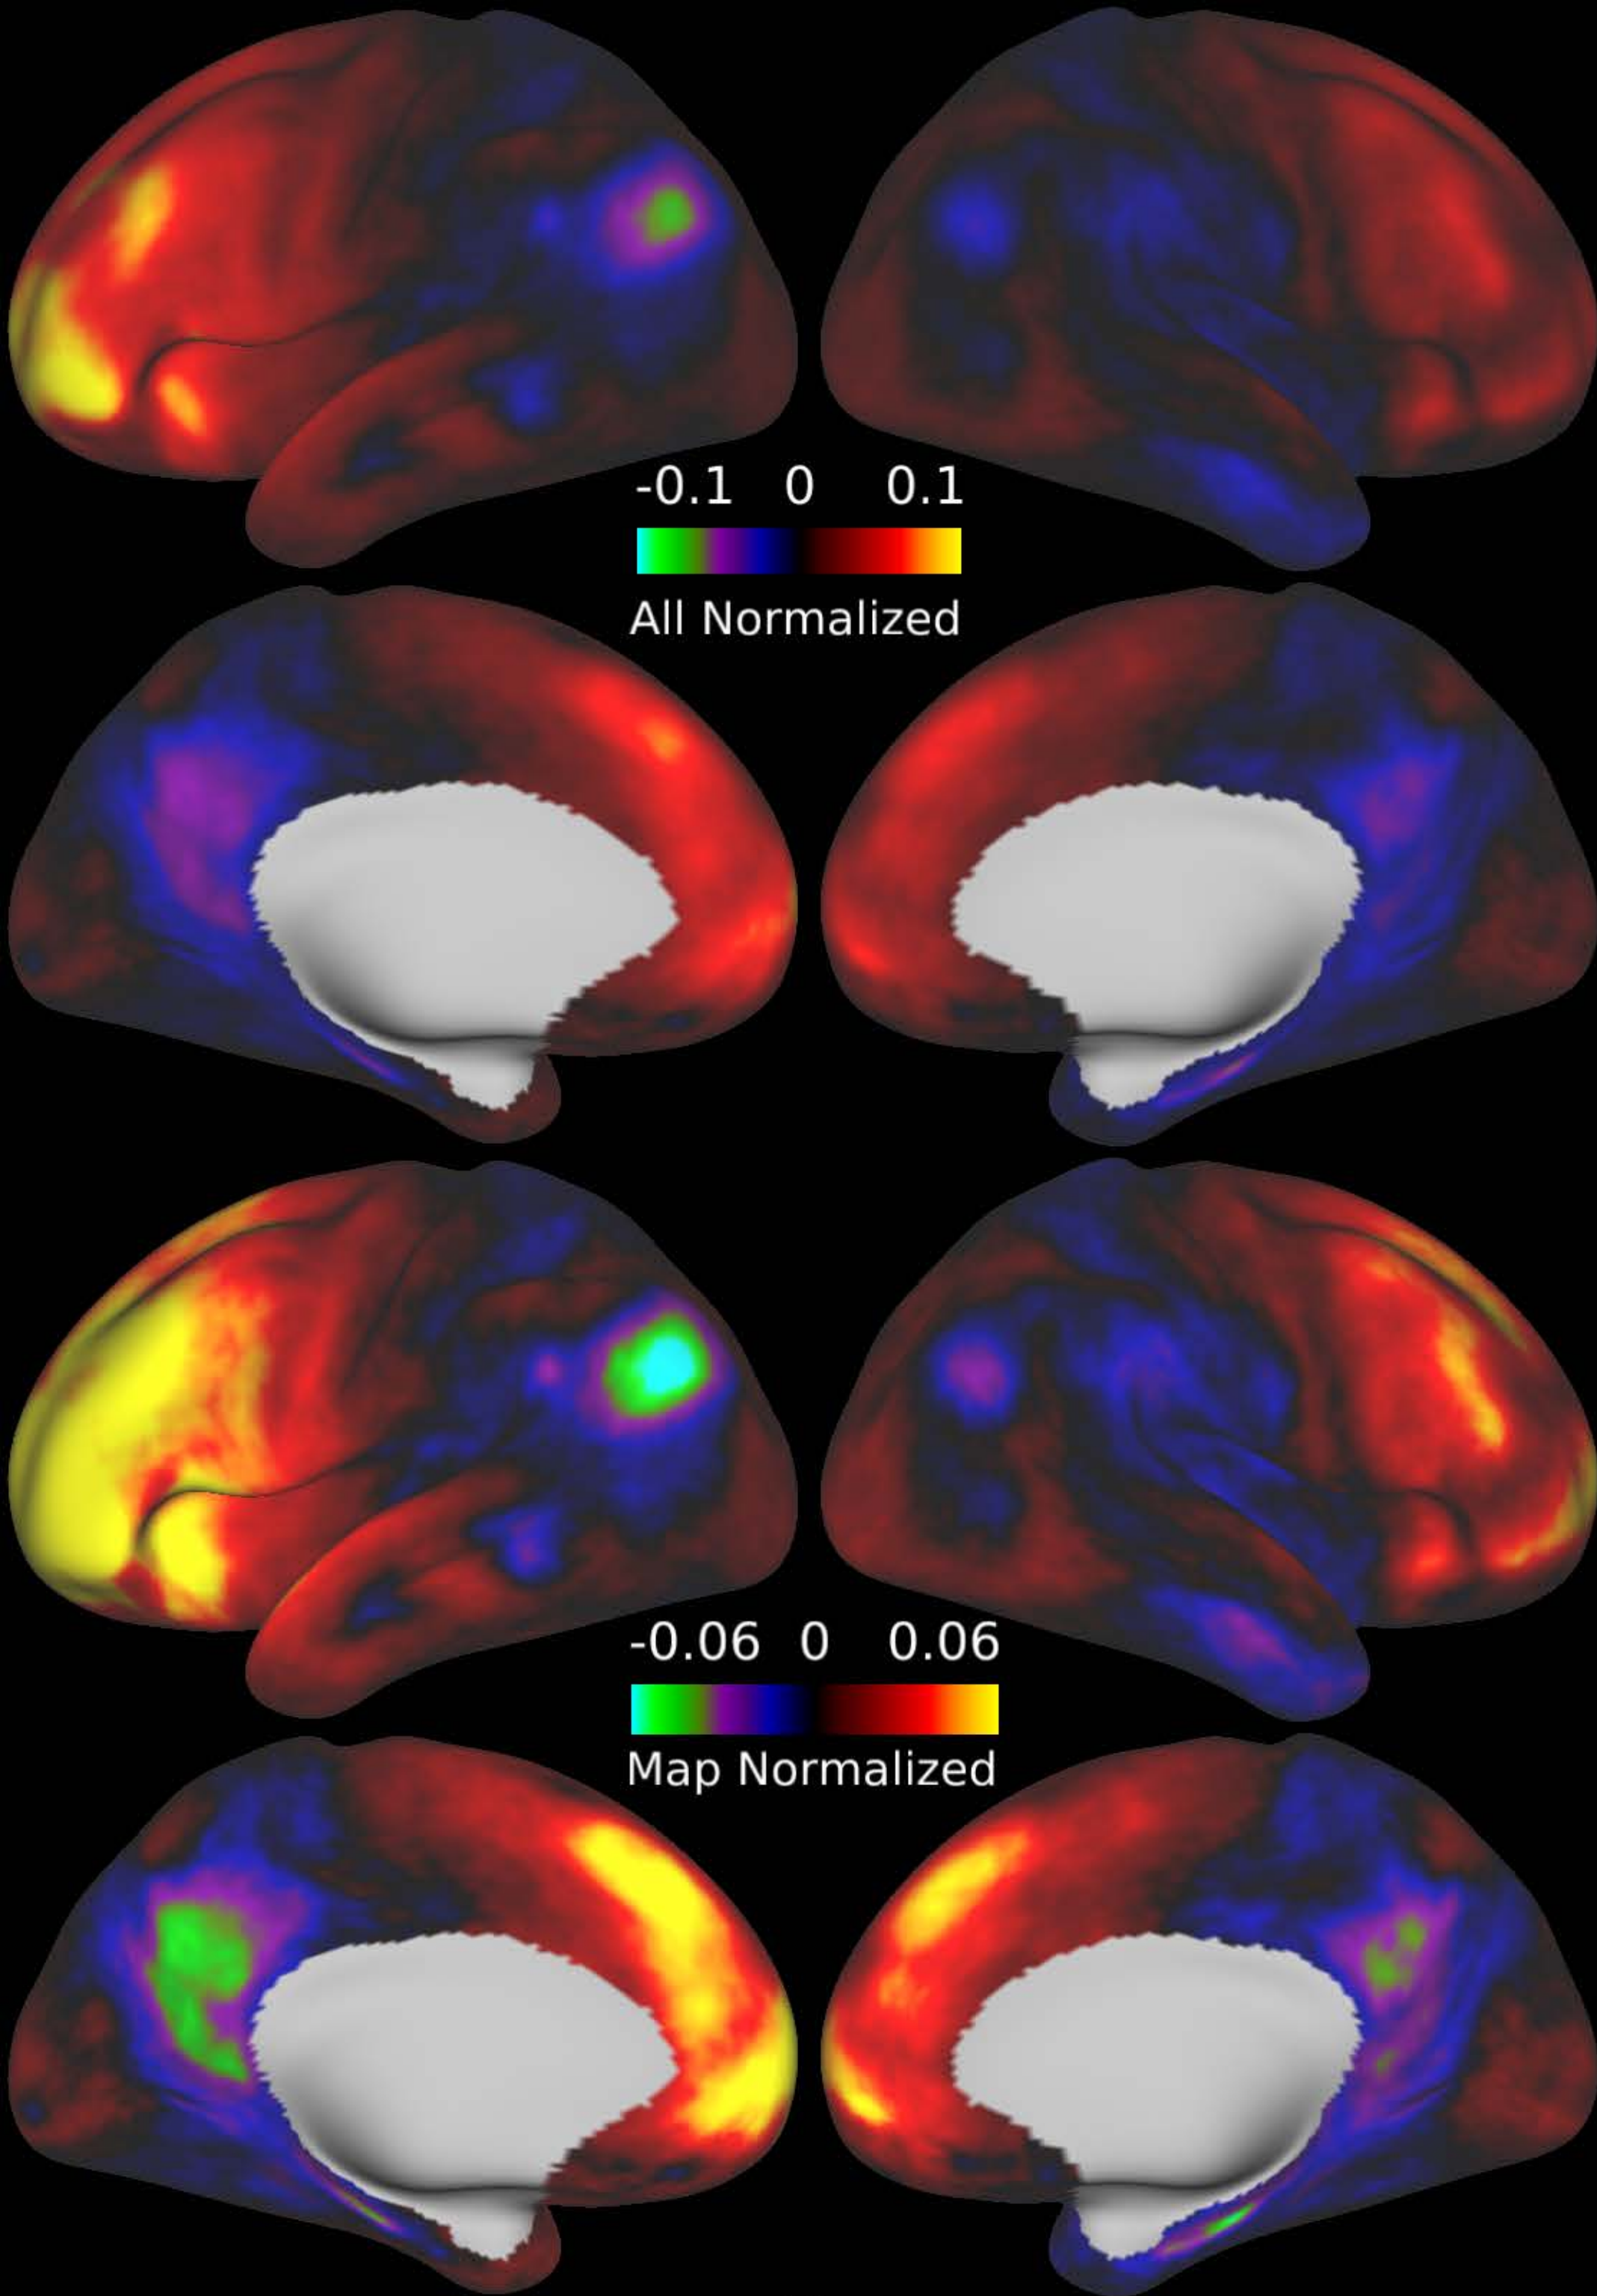

Hertz

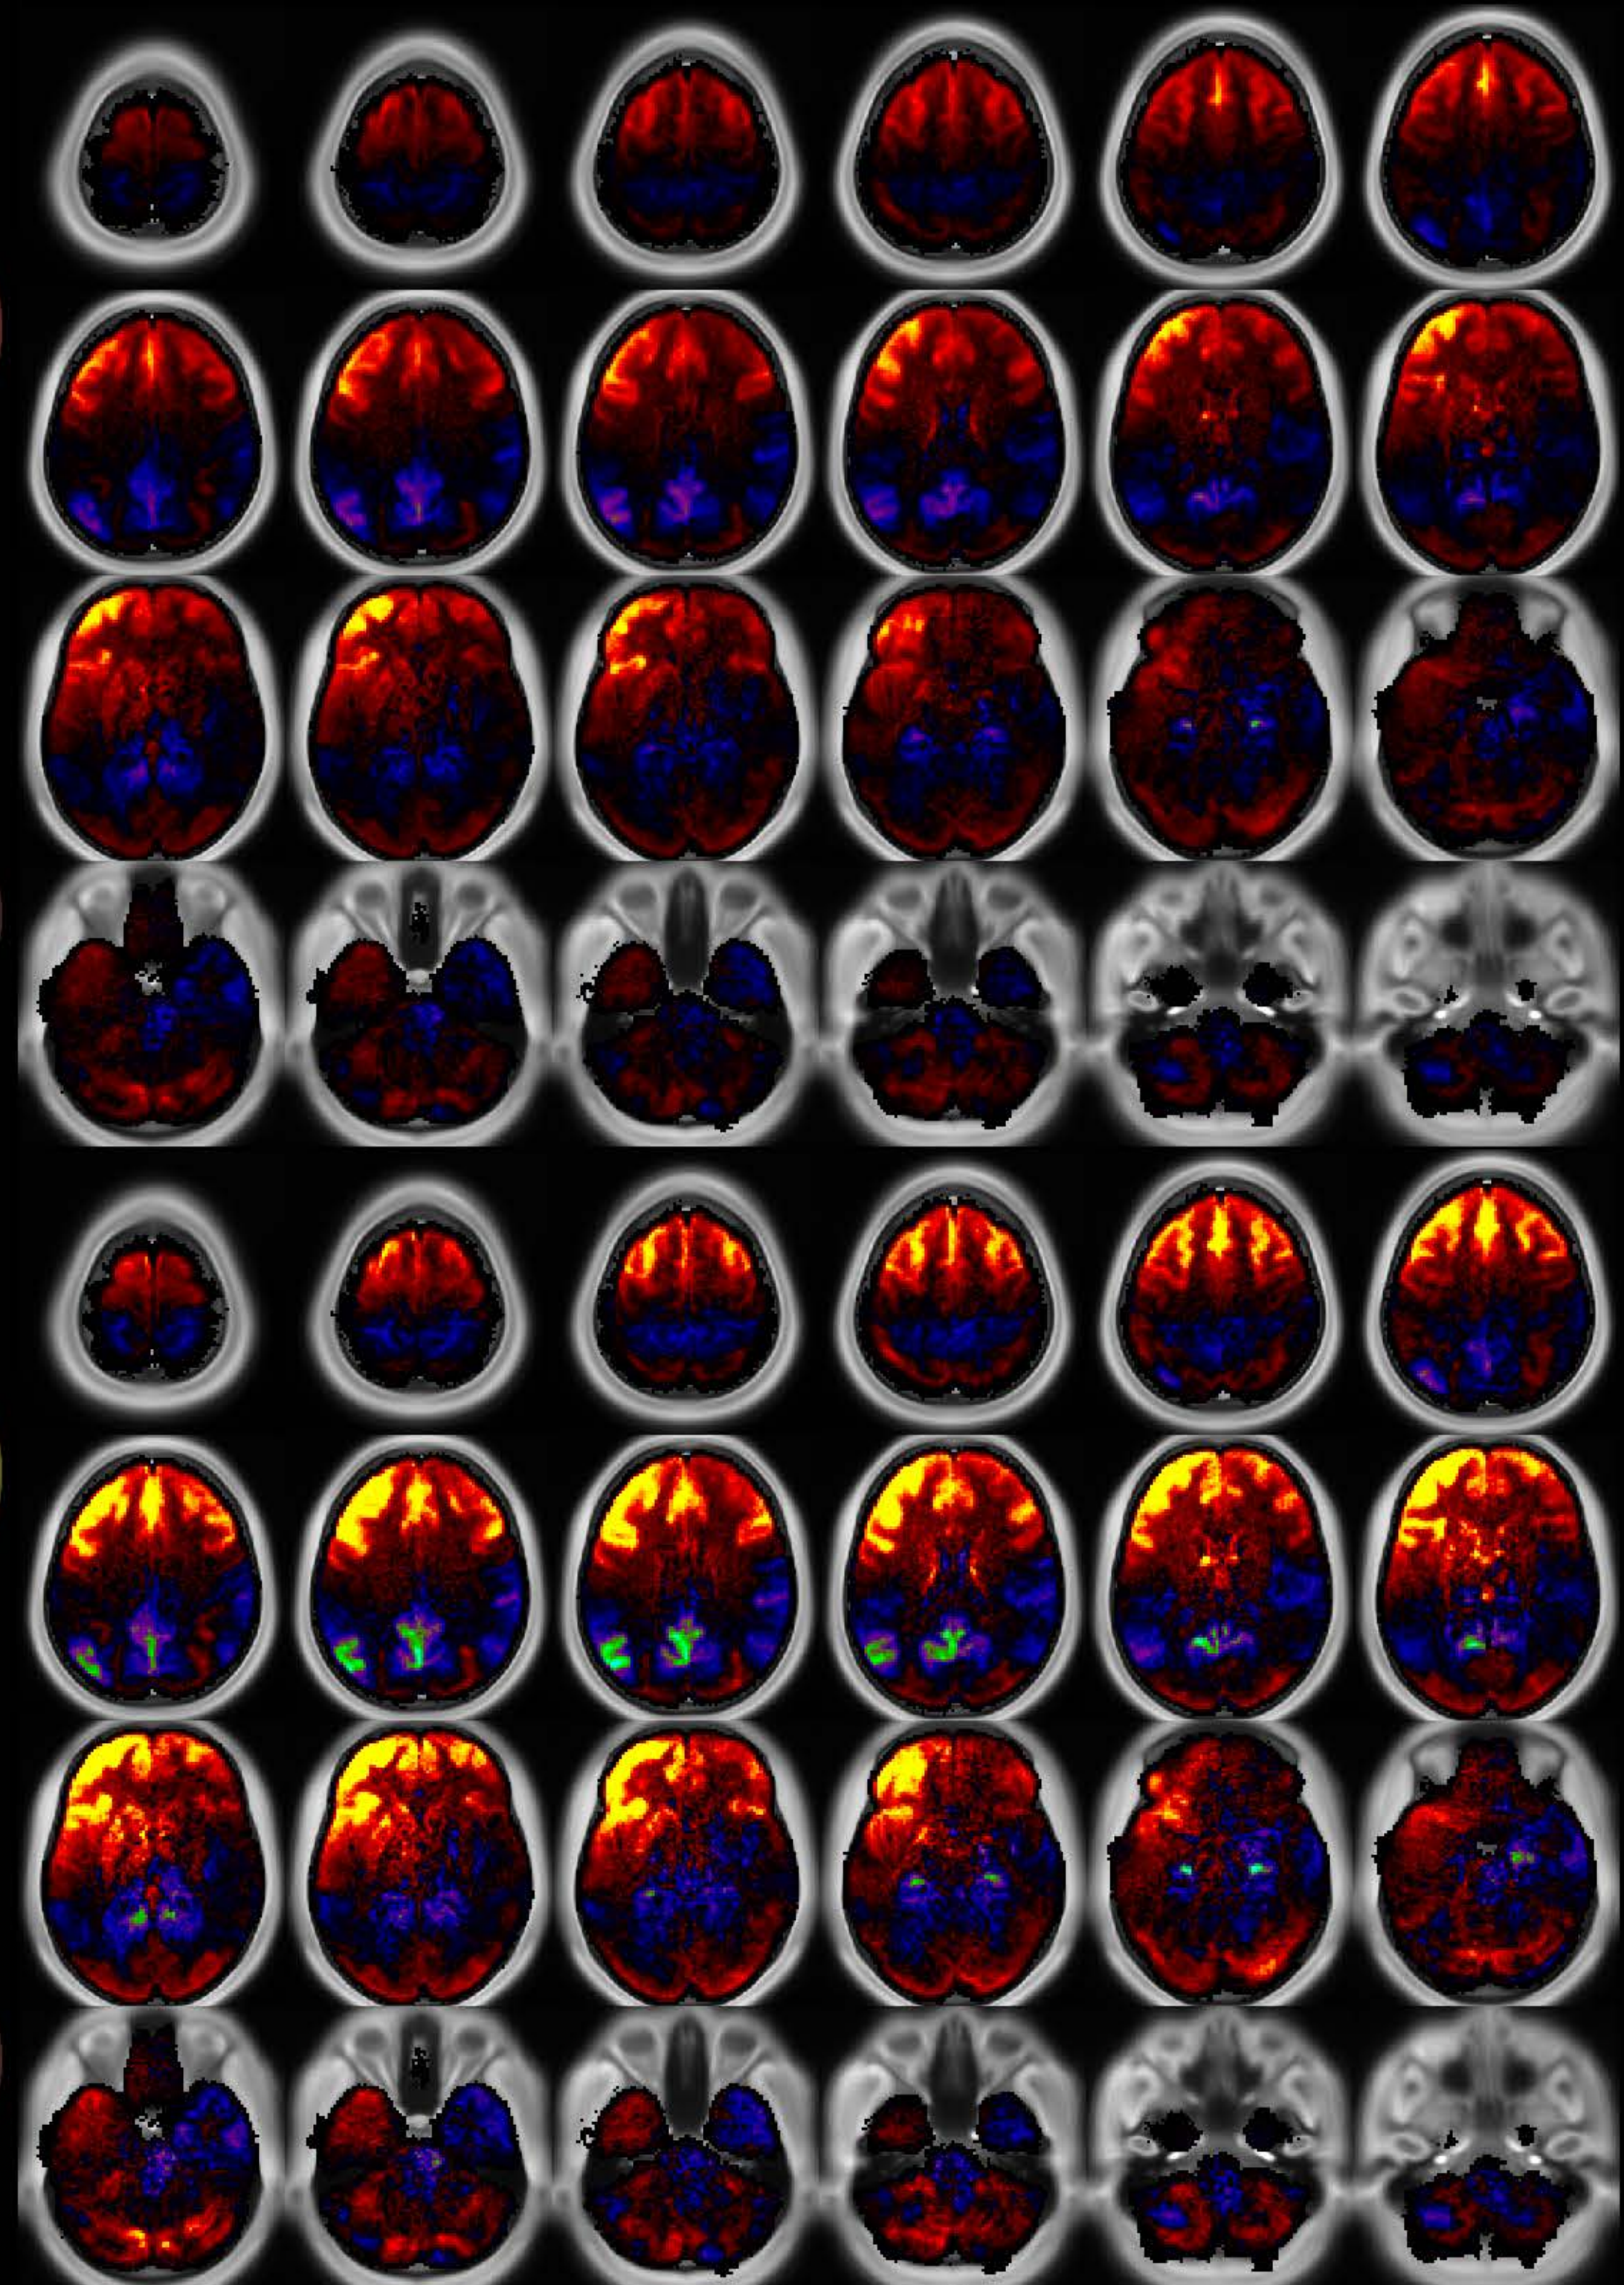

Seconds

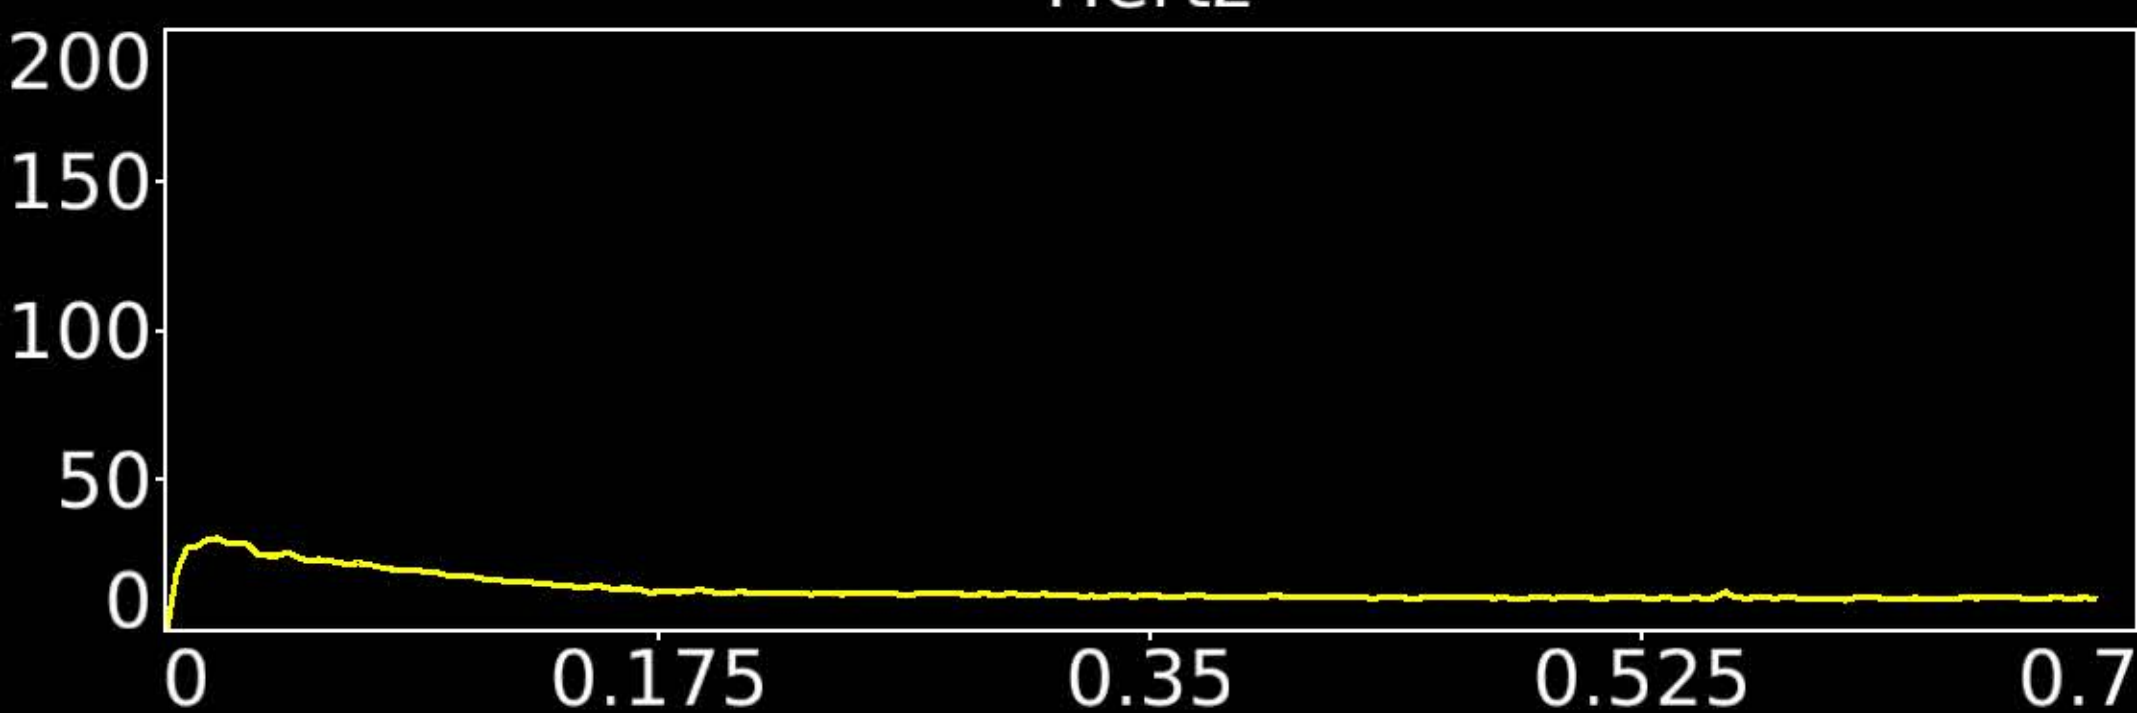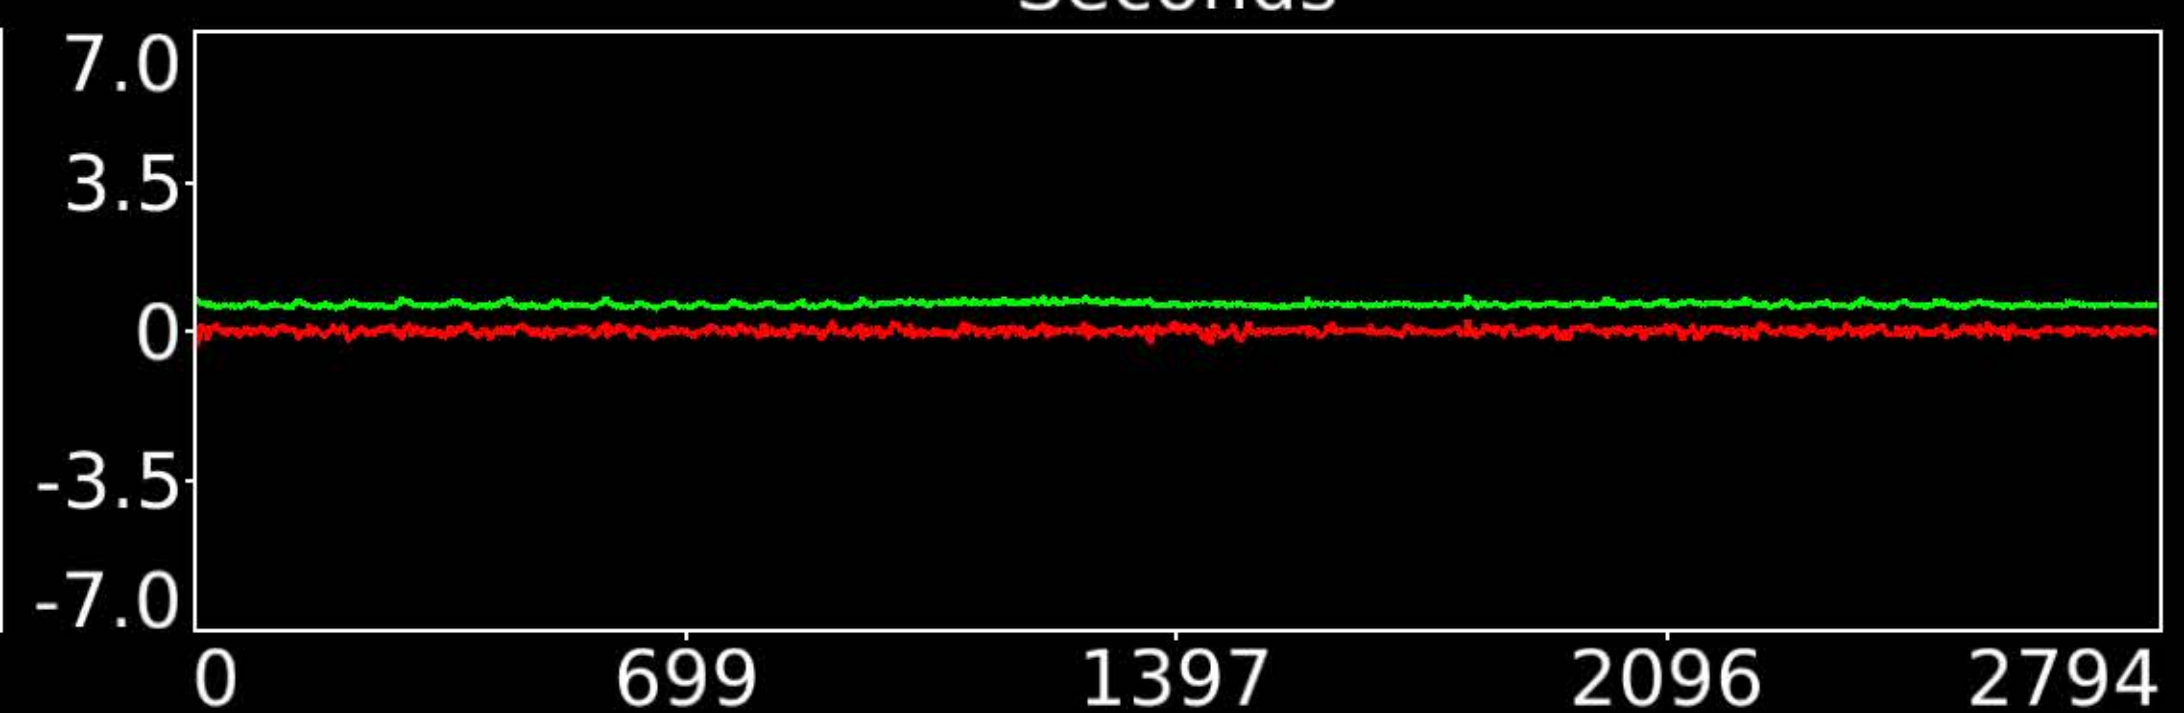

|                                                                                                           |                            |                            |  |
|-----------------------------------------------------------------------------------------------------------|----------------------------|----------------------------|--|
| Number & Class: 60 Noise                                                                                  |                            | Name: Coil or Movement     |  |
| RVT Correlated: No                                                                                        | DVARS Dip Associated: Yes  | Cross-Subject Variable: No |  |
| Single Subject: No                                                                                        | % Variance Explained: 0.66 | Globality Index: 0.78      |  |
| Rest Component: No                                                                                        | Taskr Component: 46        | Task Modulated: No         |  |
| Rationale: Substantial white matter signal; associated with DVARS dips; perhaps related to coil or motion |                            |                            |  |



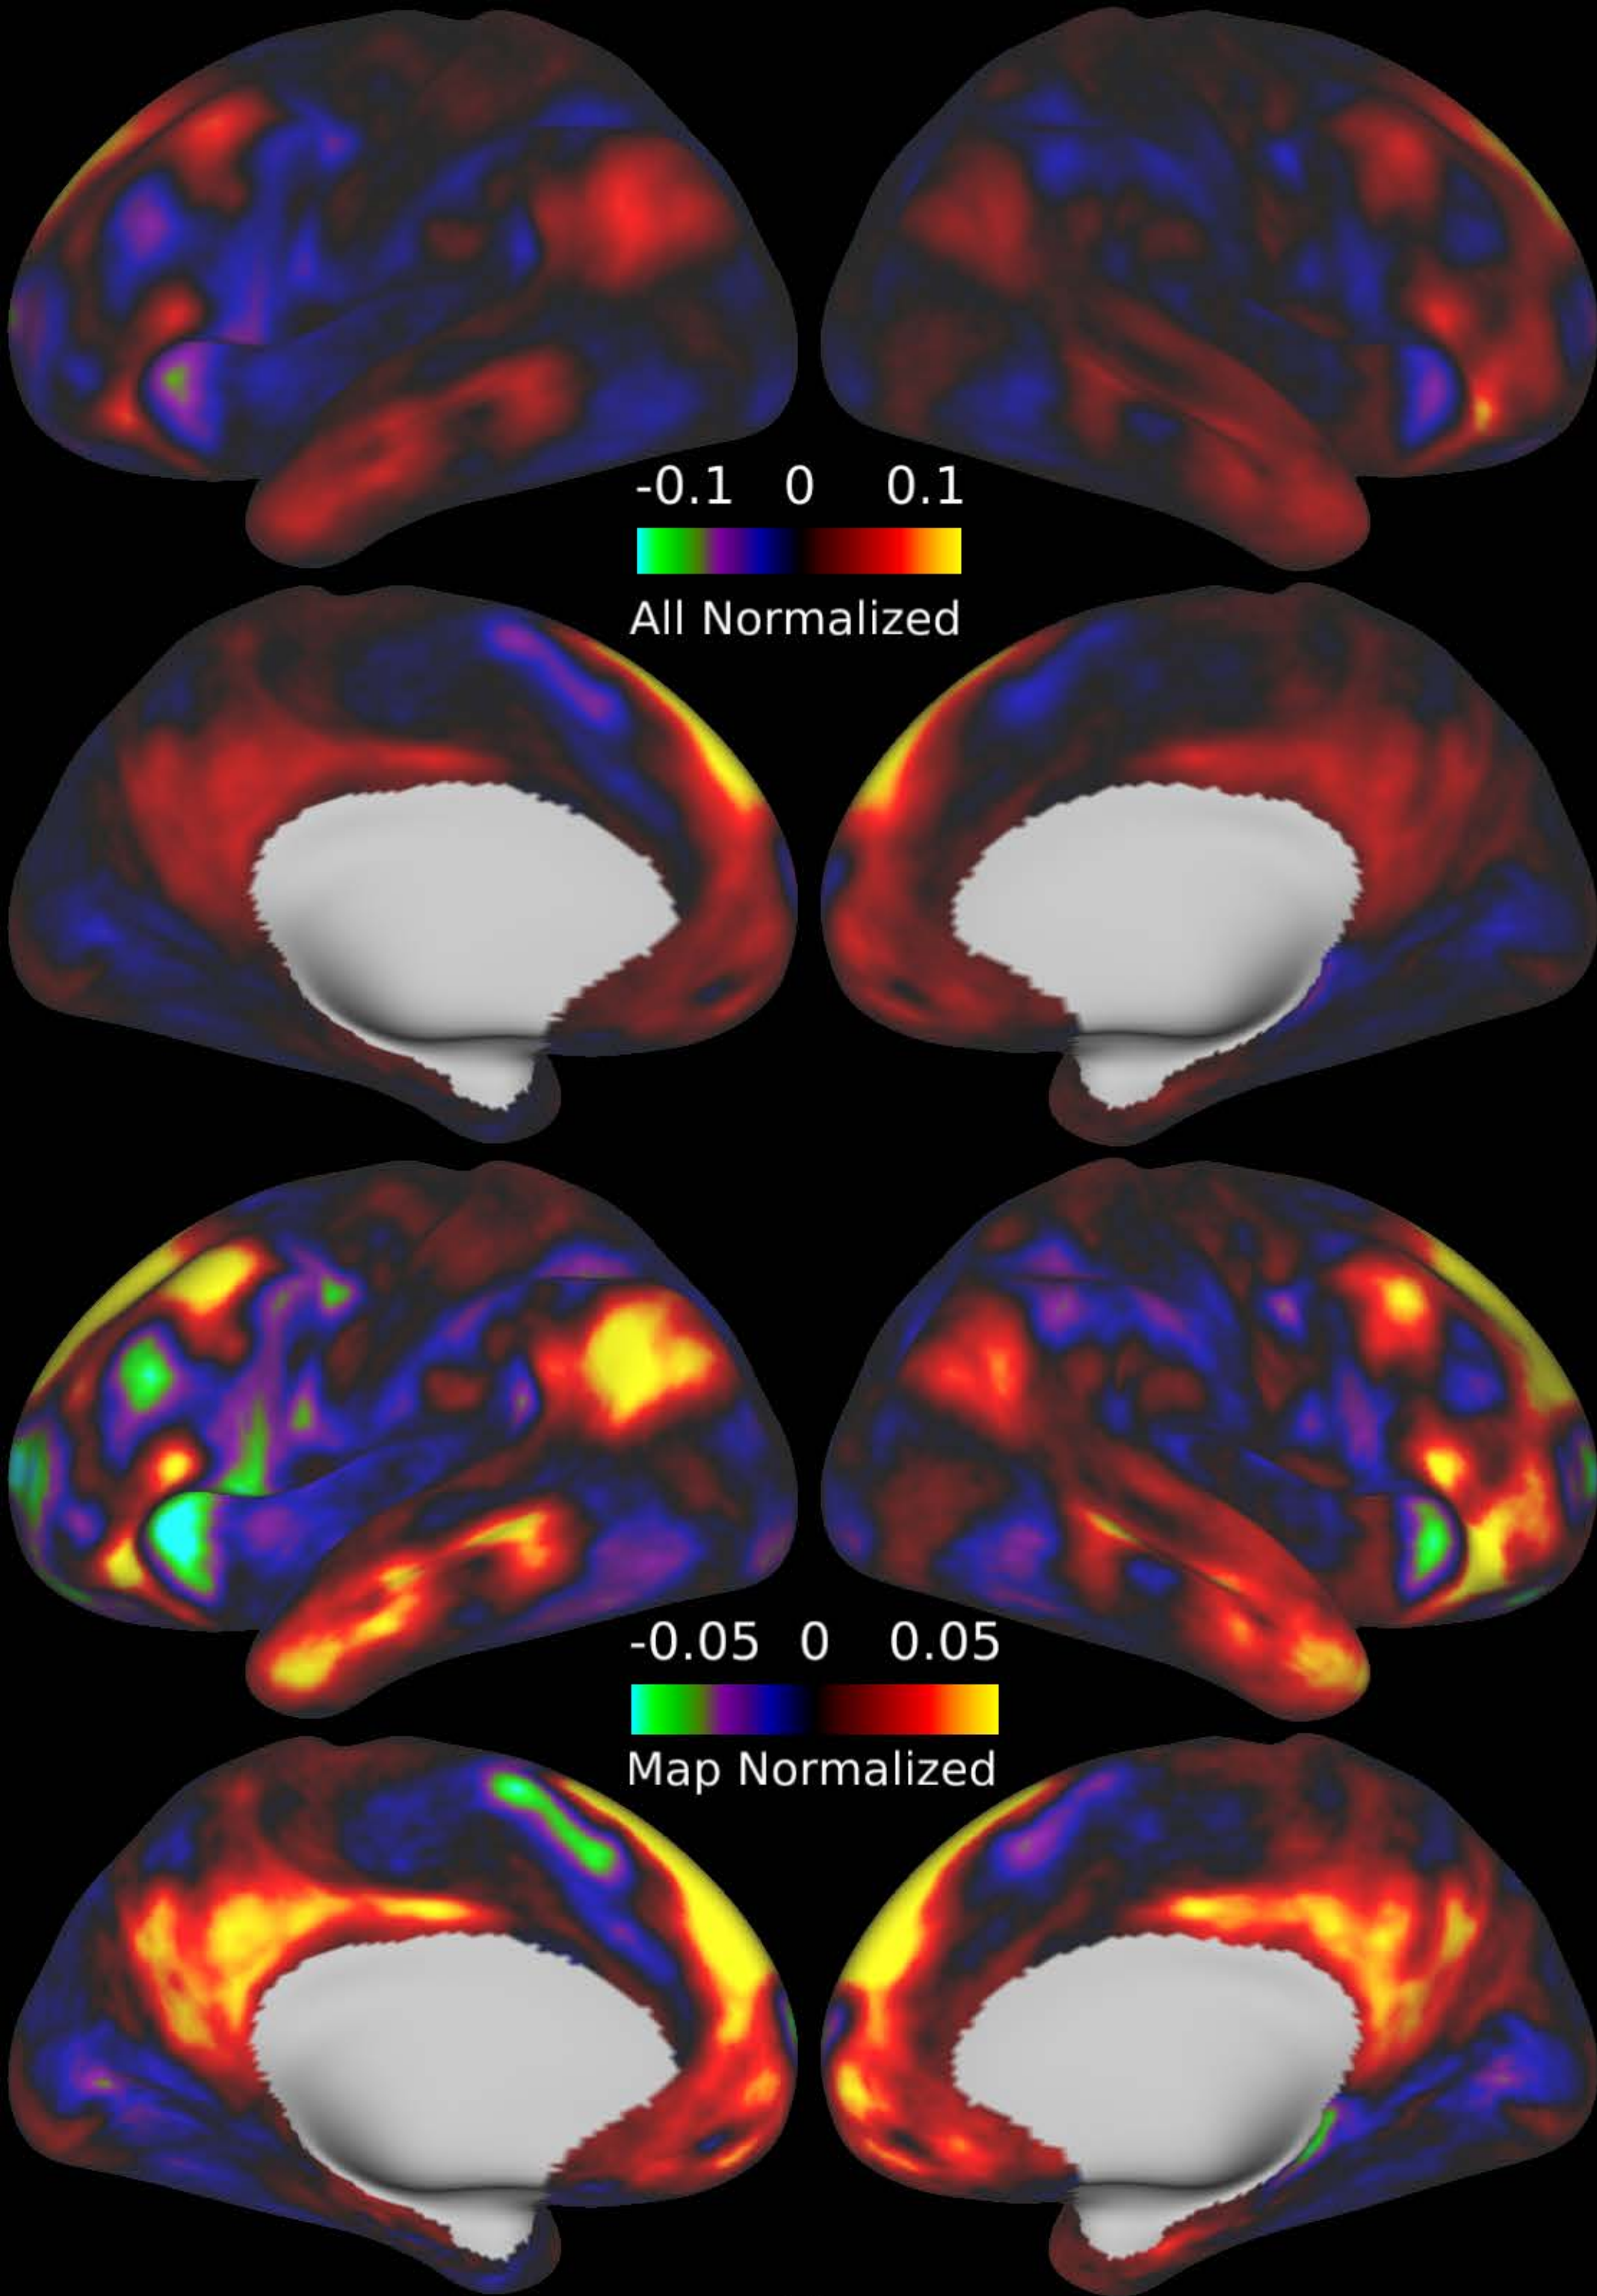

Hertz

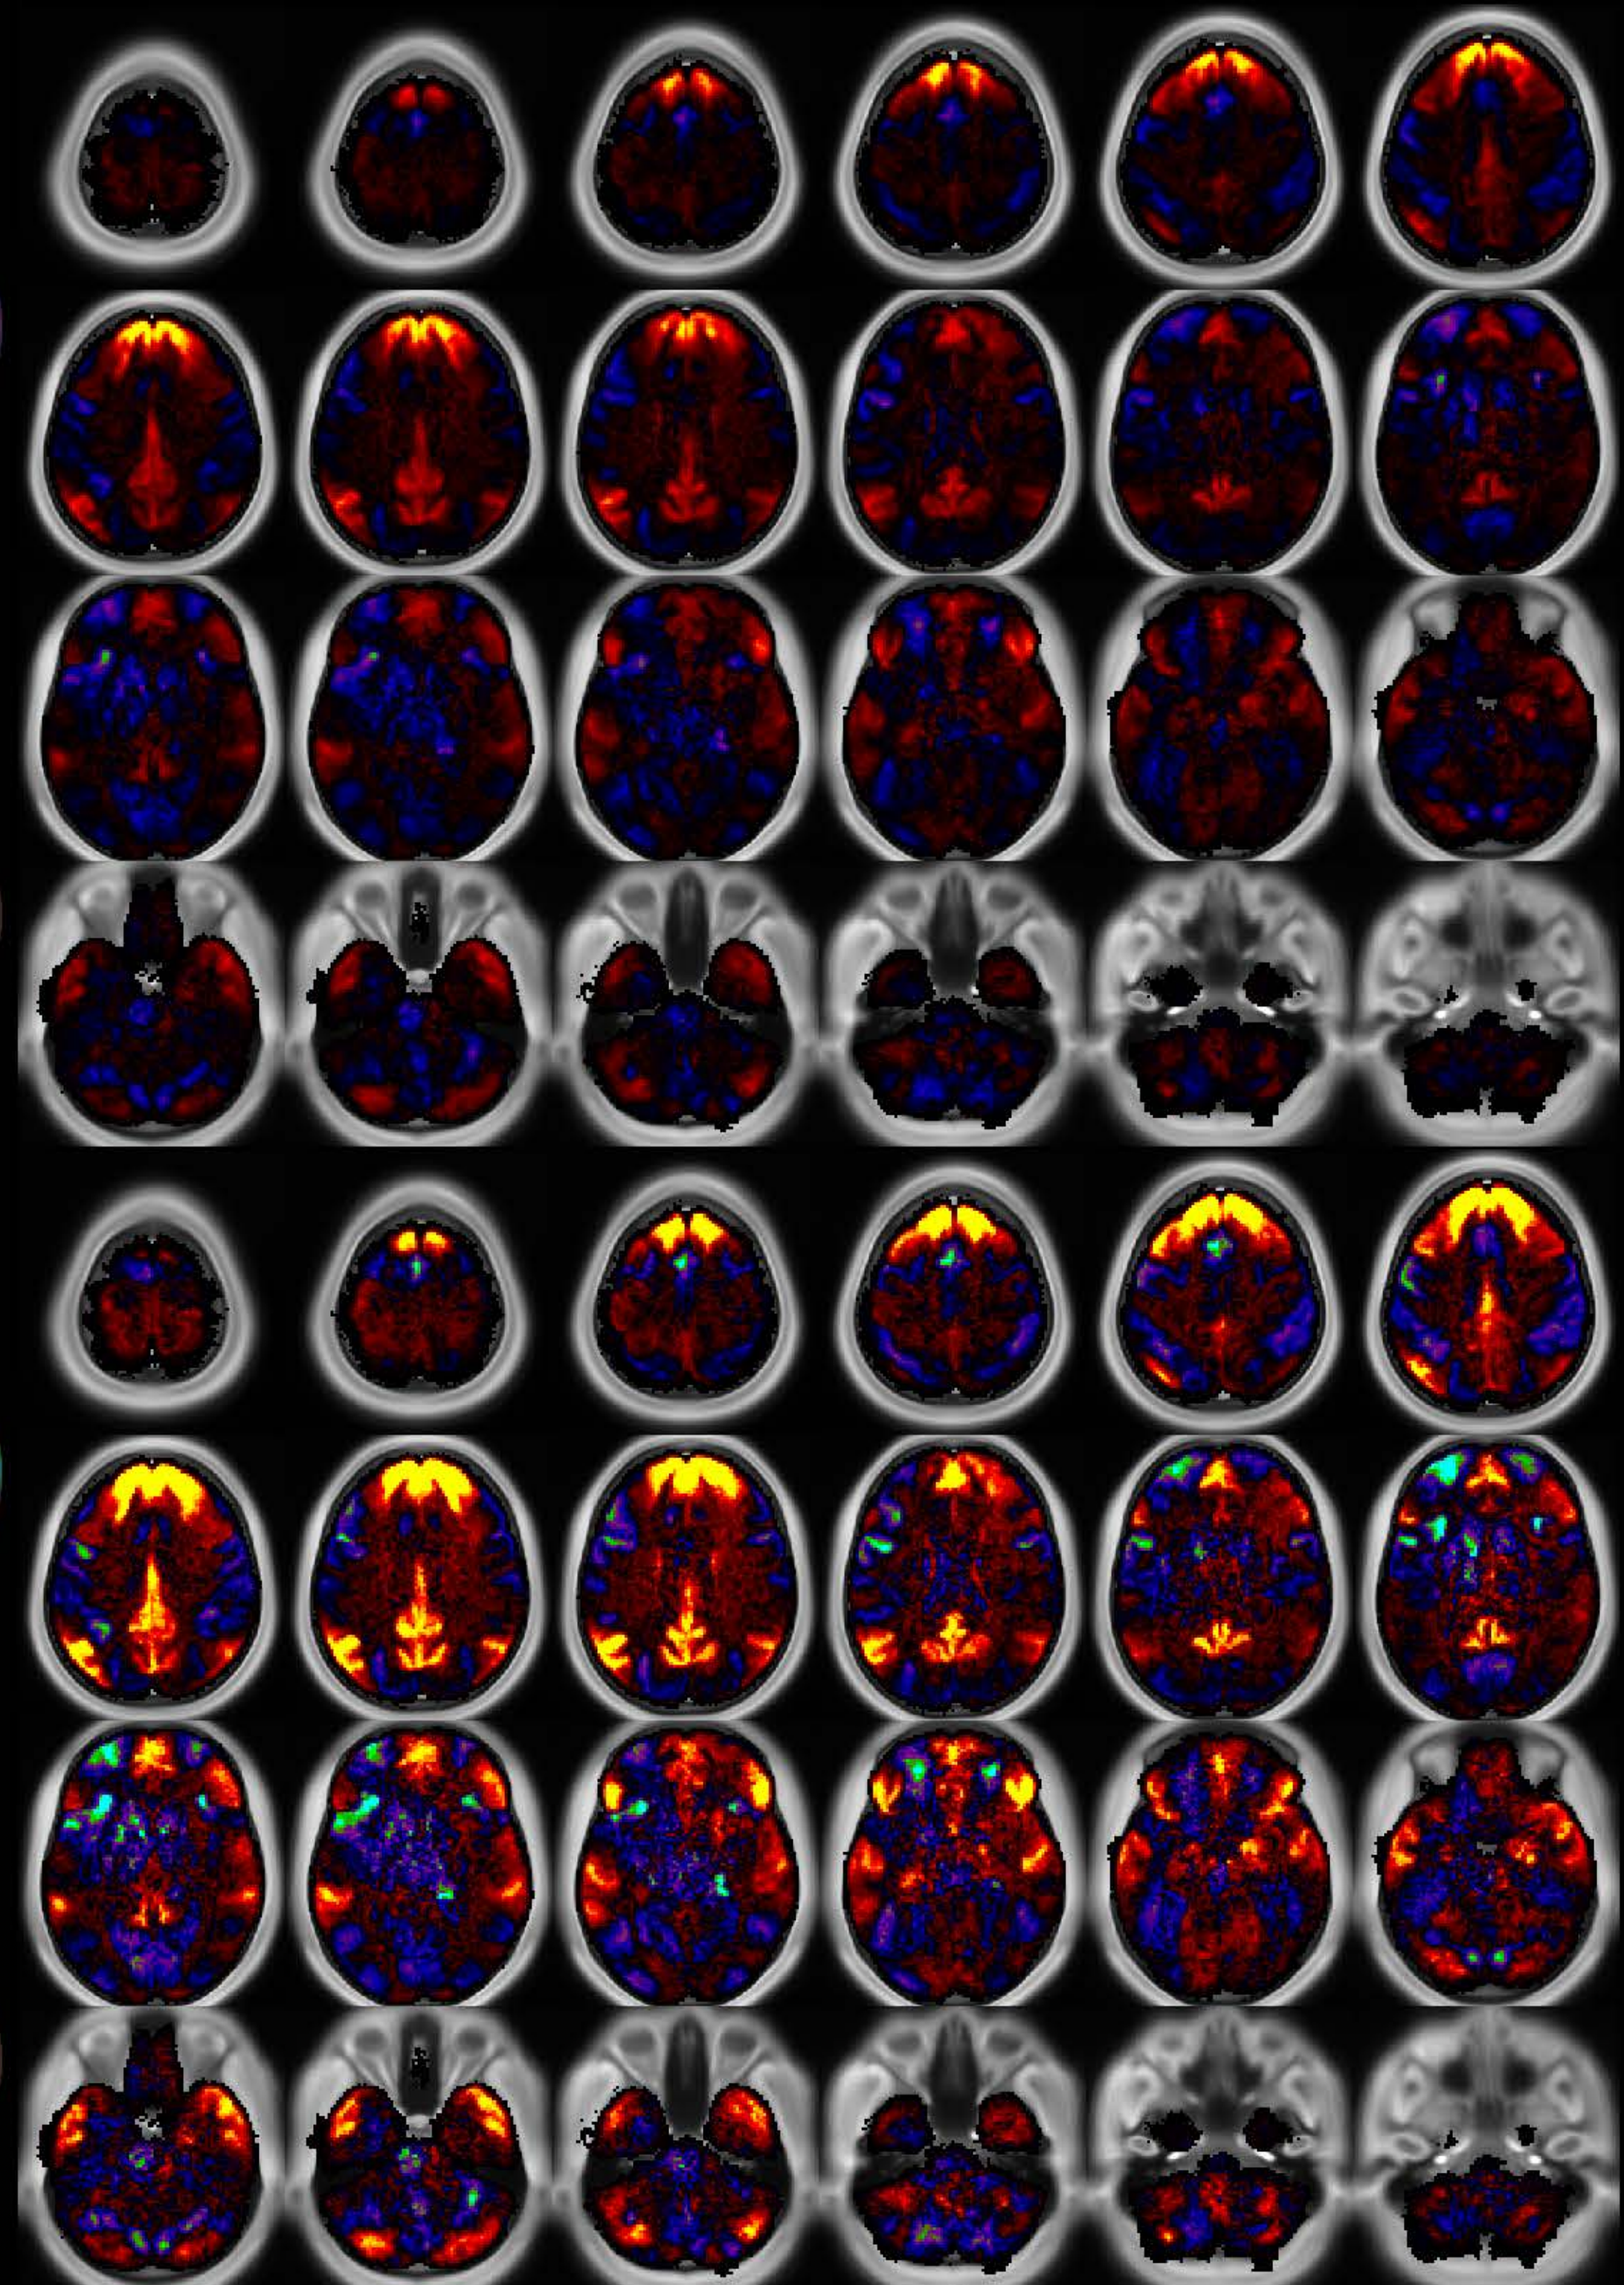

Seconds

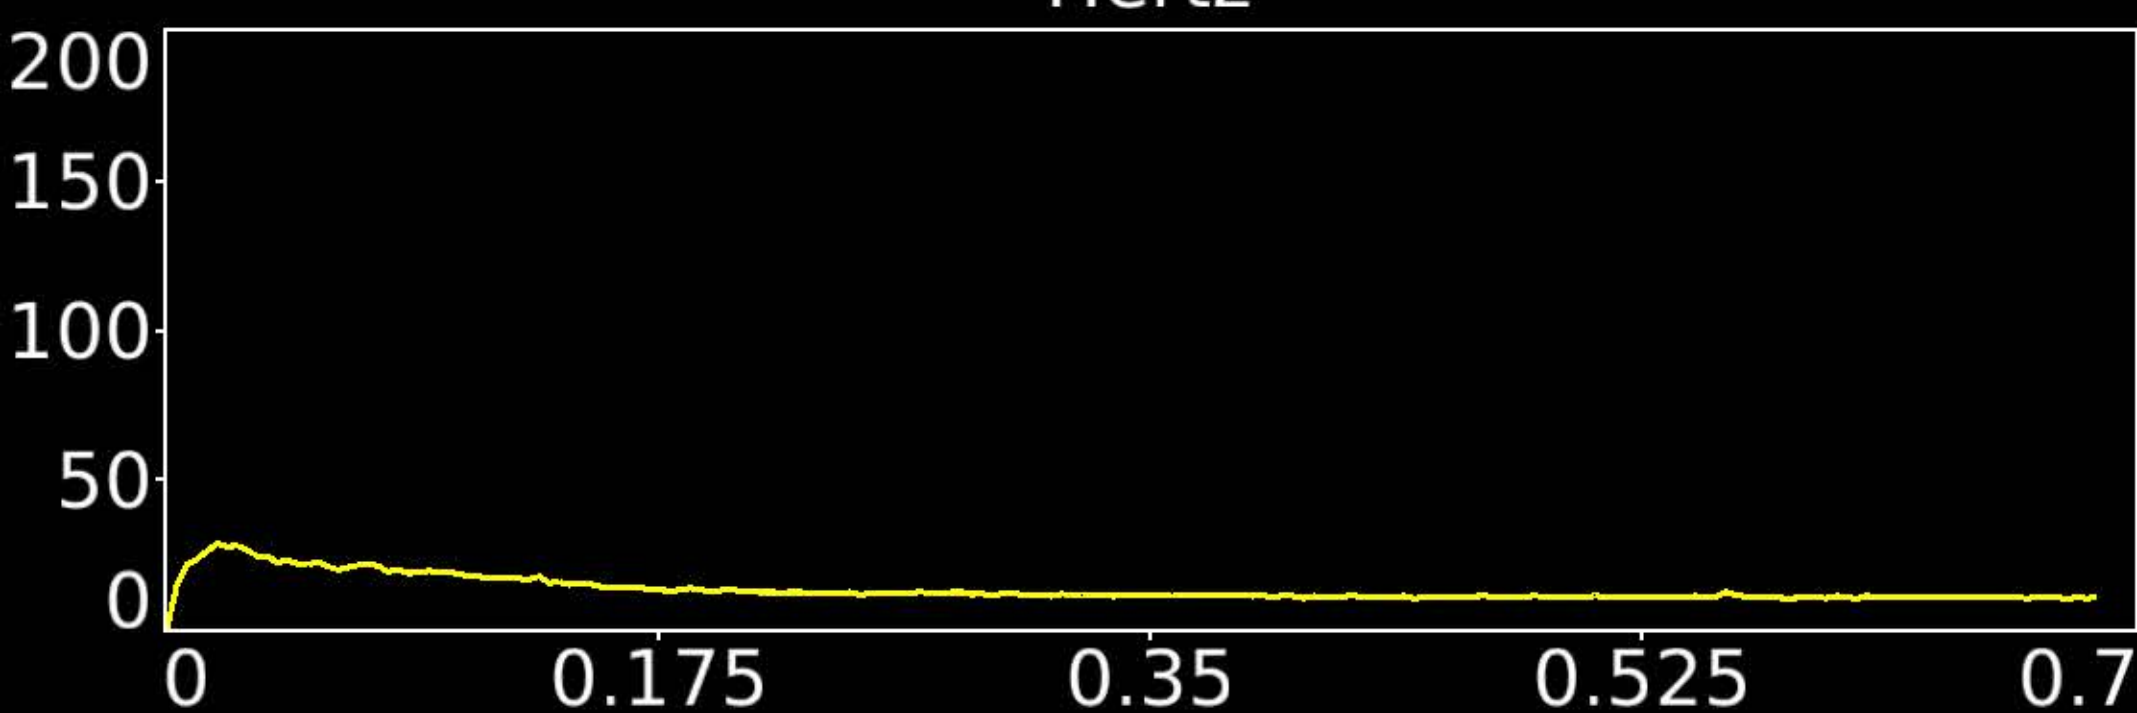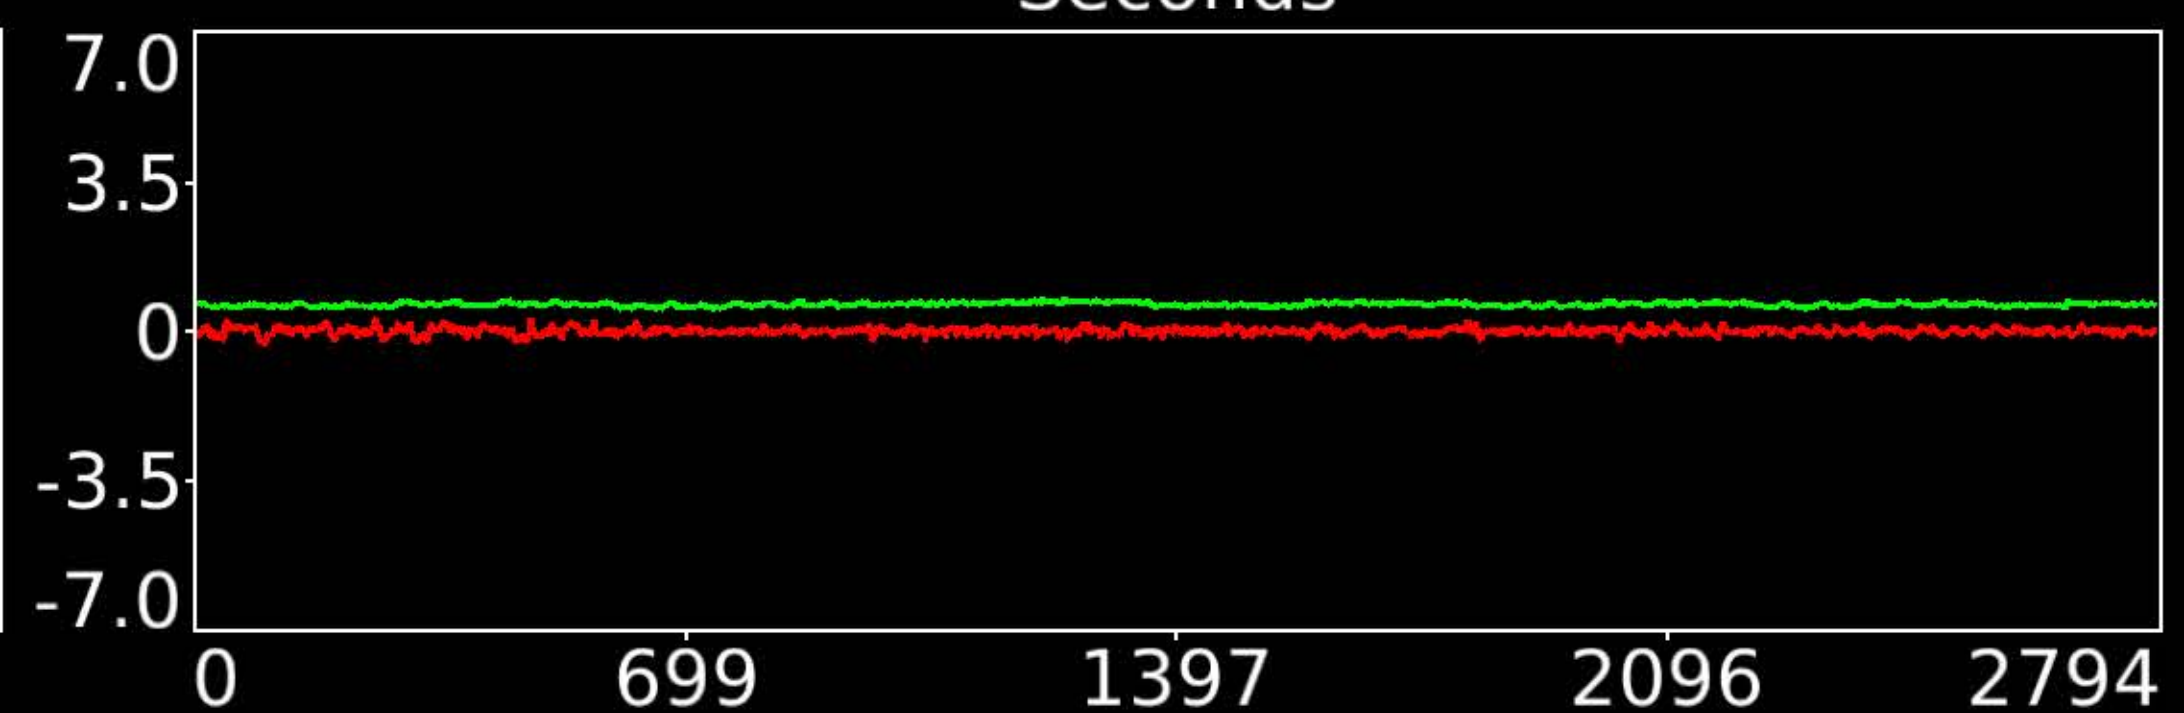

|                                                                                                                   |                            |                               |  |
|-------------------------------------------------------------------------------------------------------------------|----------------------------|-------------------------------|--|
| Number & Class: 61 Signal                                                                                         |                            | Name: Subsidiary Default Mode |  |
| RVT Correlated: No                                                                                                | DVARS Dip Associated: Yes  | Cross-Subject Variable: No    |  |
| Single Subject: No                                                                                                | % Variance Explained: 0.66 | Globality Index: 0.29         |  |
| Rest Component: No                                                                                                | Taskr Component: No        | Task Modulated: No            |  |
| Rationale: Spatial map includes positive and negative patches that respect known RSNs (e.g. Default Mode Network) |                            |                               |  |



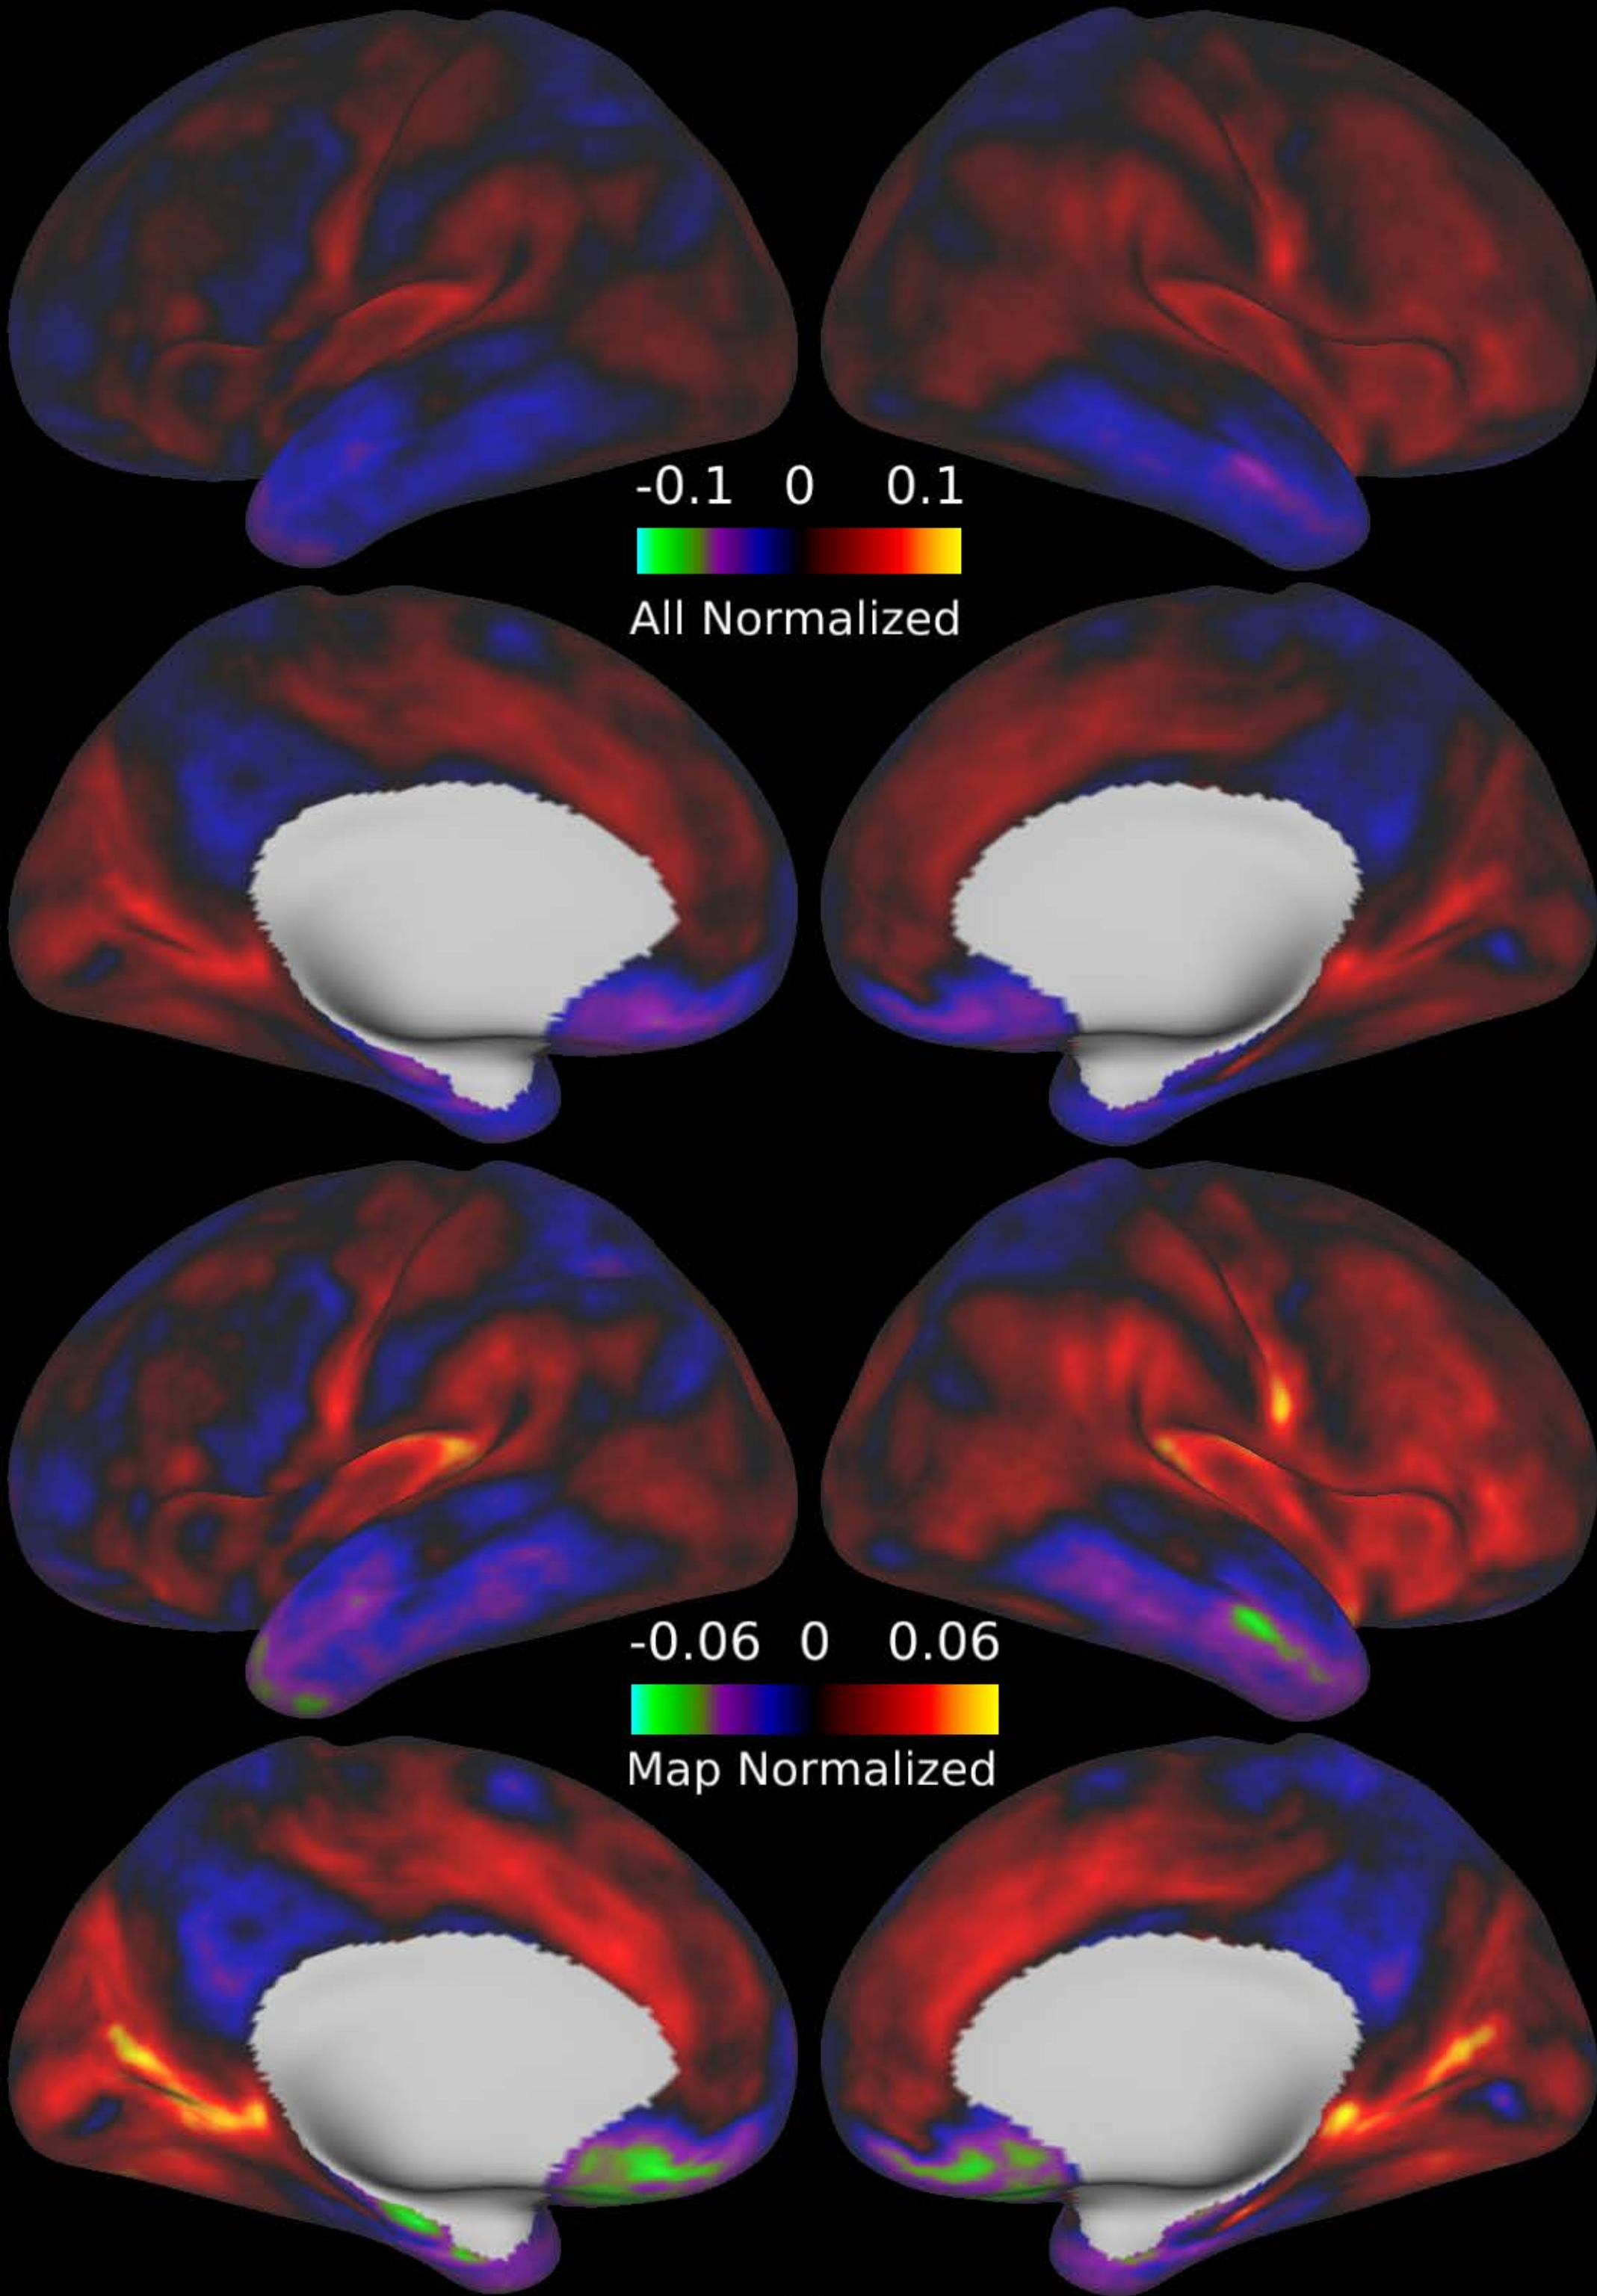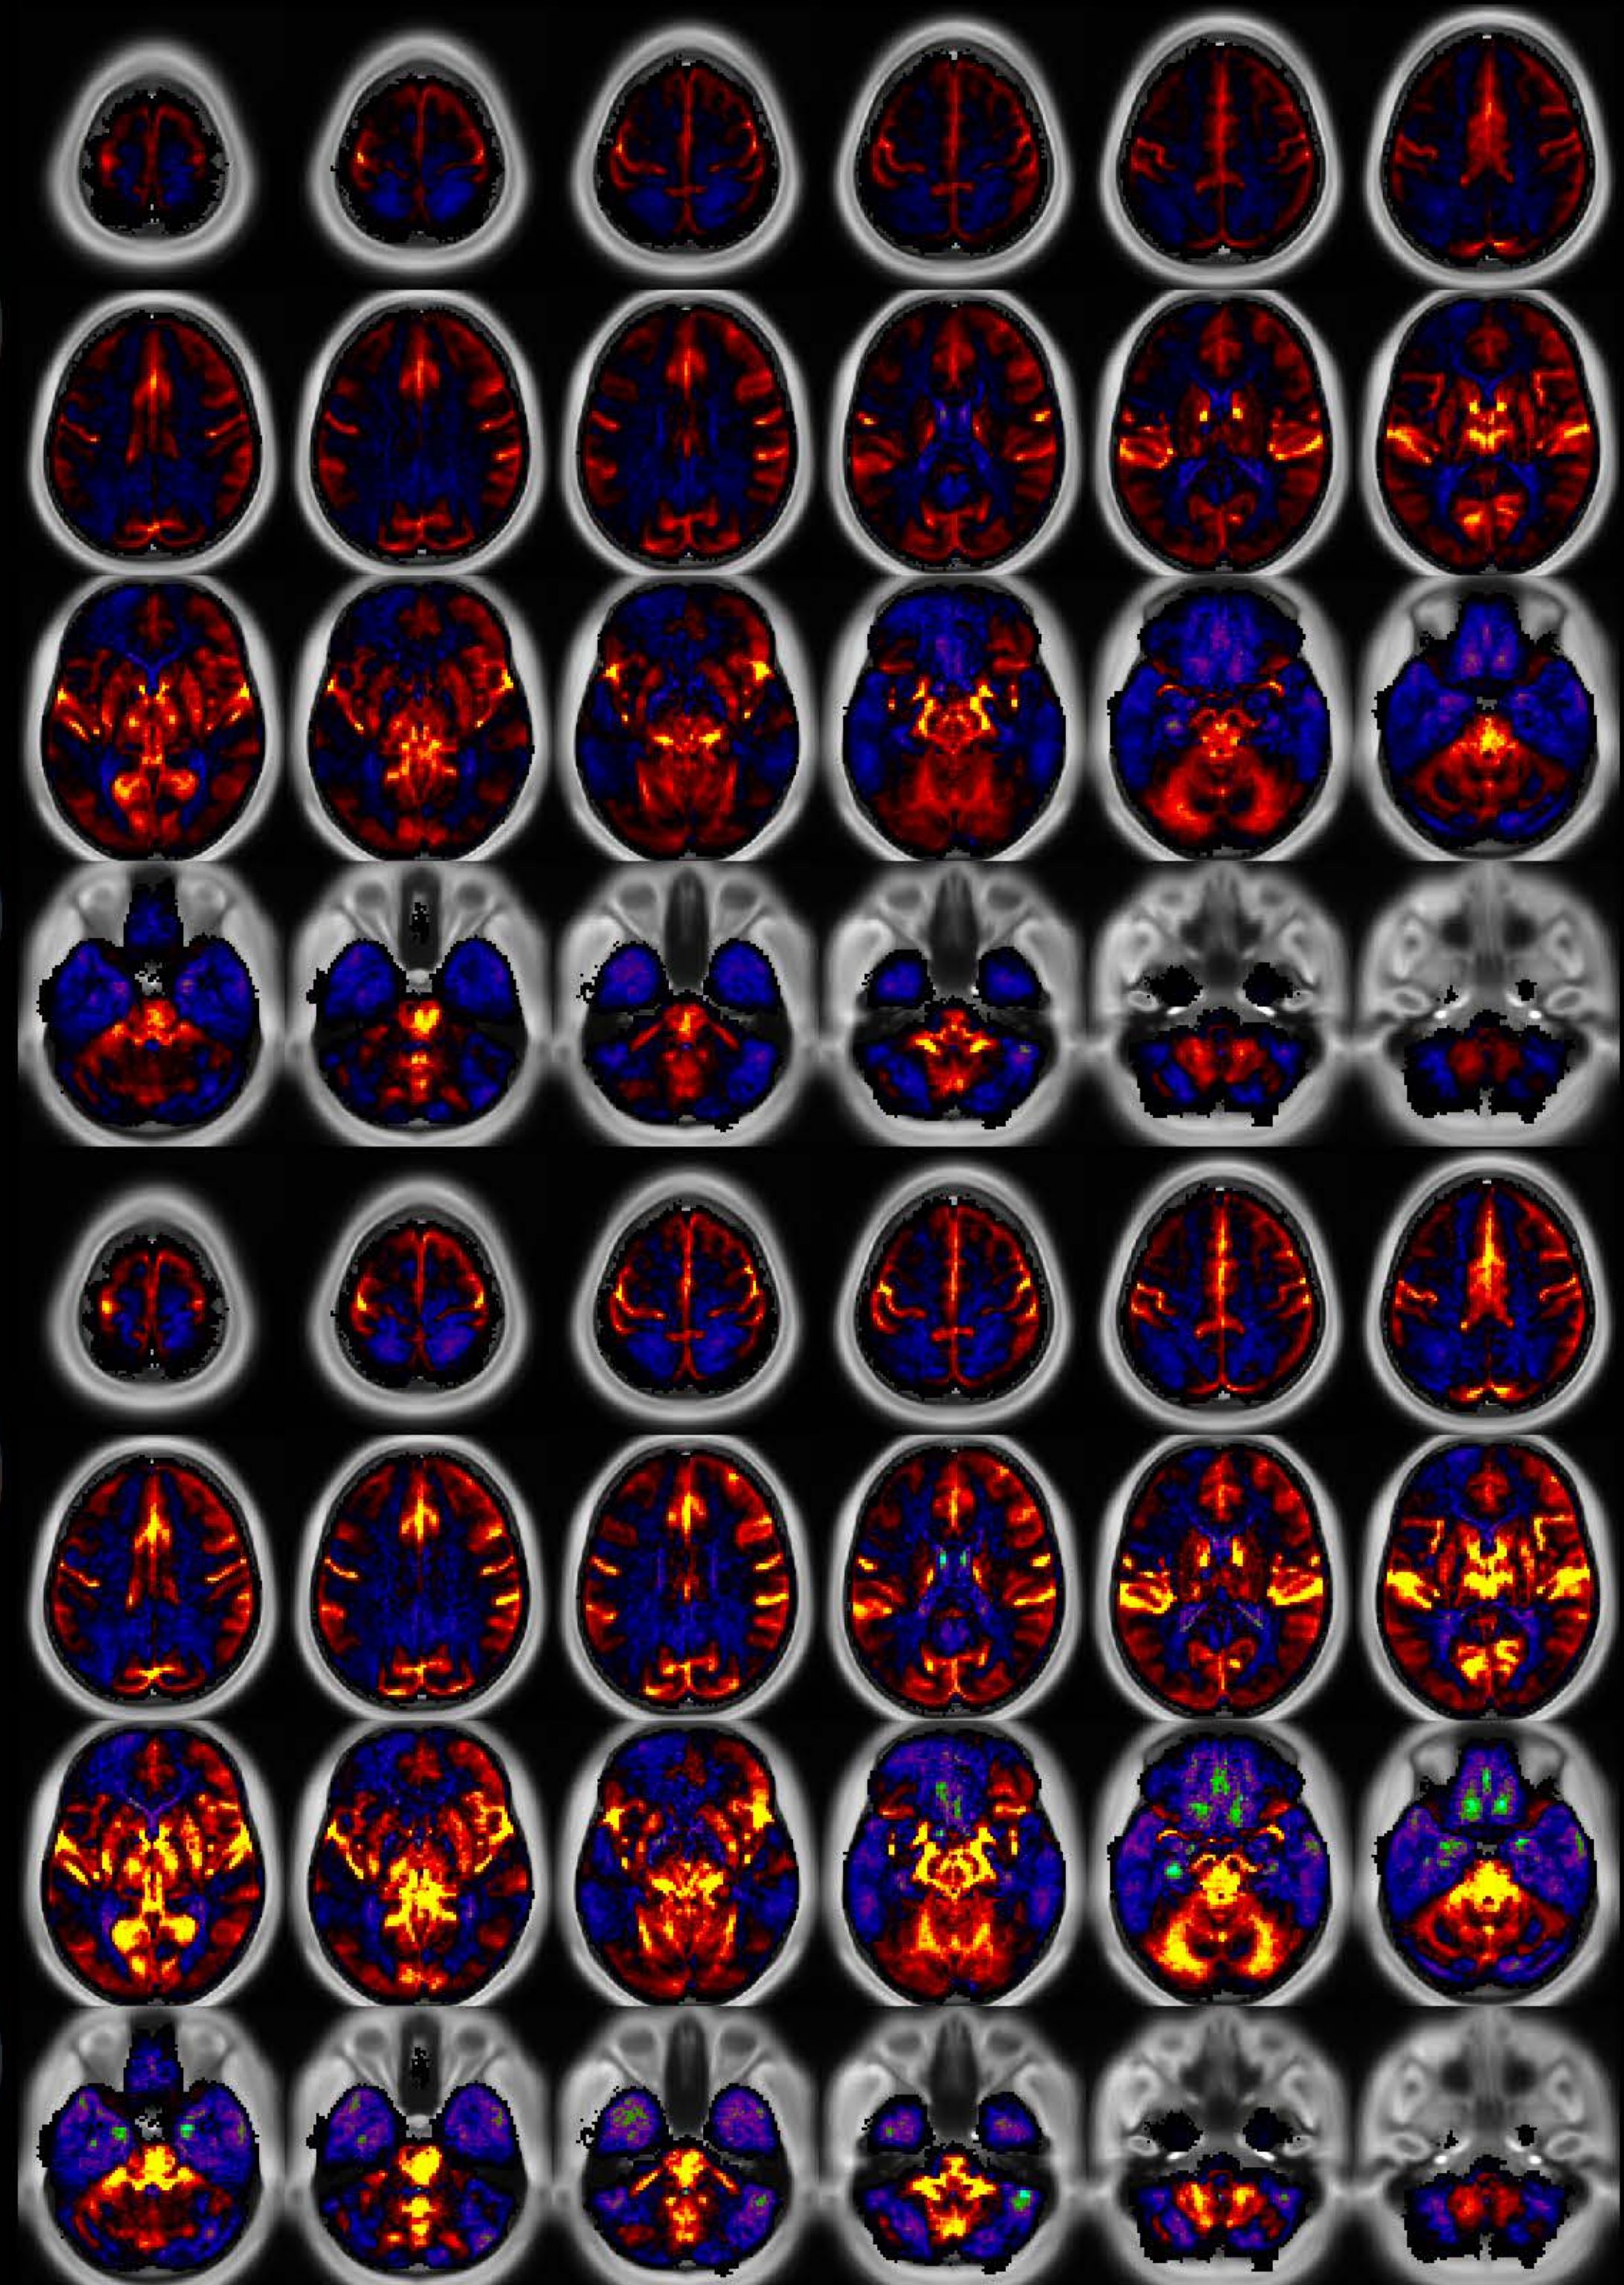

Hertz

Seconds

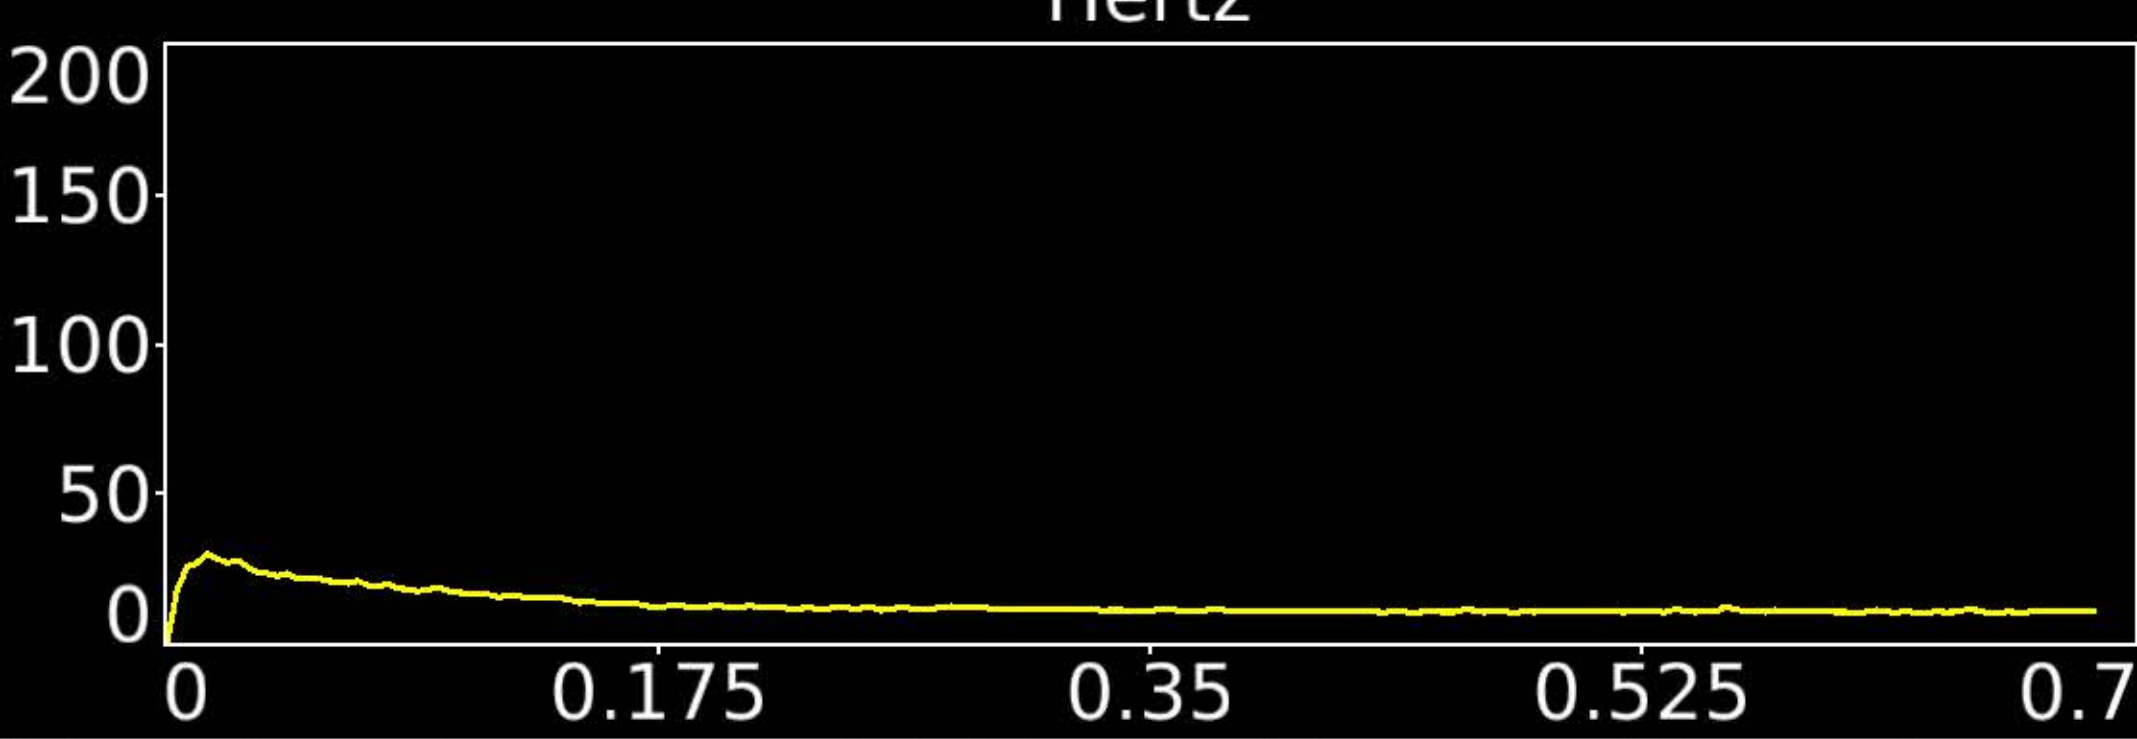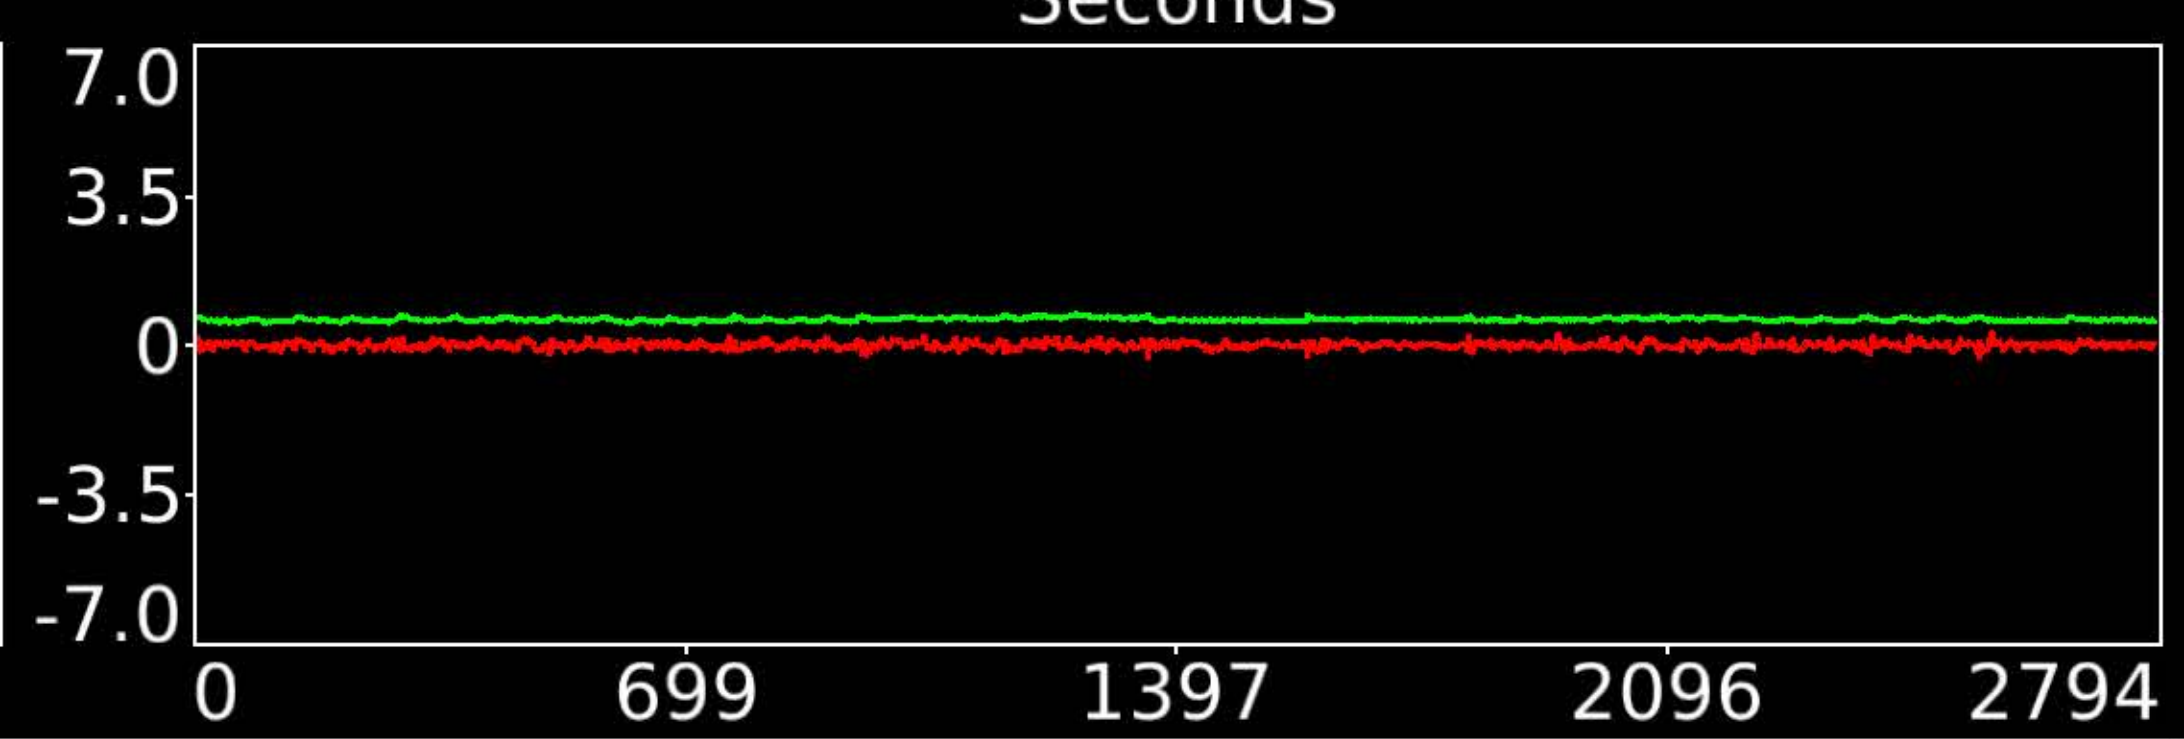

|                          |                            |                            |  |
|--------------------------|----------------------------|----------------------------|--|
| Number & Class: 62 Noise |                            | Name: Vascular?            |  |
| RVT Correlated: No       | DVARS Dip Associated: Yes  | Cross-Subject Variable: No |  |
| Single Subject: No       | % Variance Explained: 0.55 | Globality Index: 0.74      |  |
| Rest Component: No       | Taskr Component: No        | Task Modulated: No         |  |

Rationale: Component more prominent in volume than on surface in cortical regions suggestive of vascular artifact; also DVARS dips associated



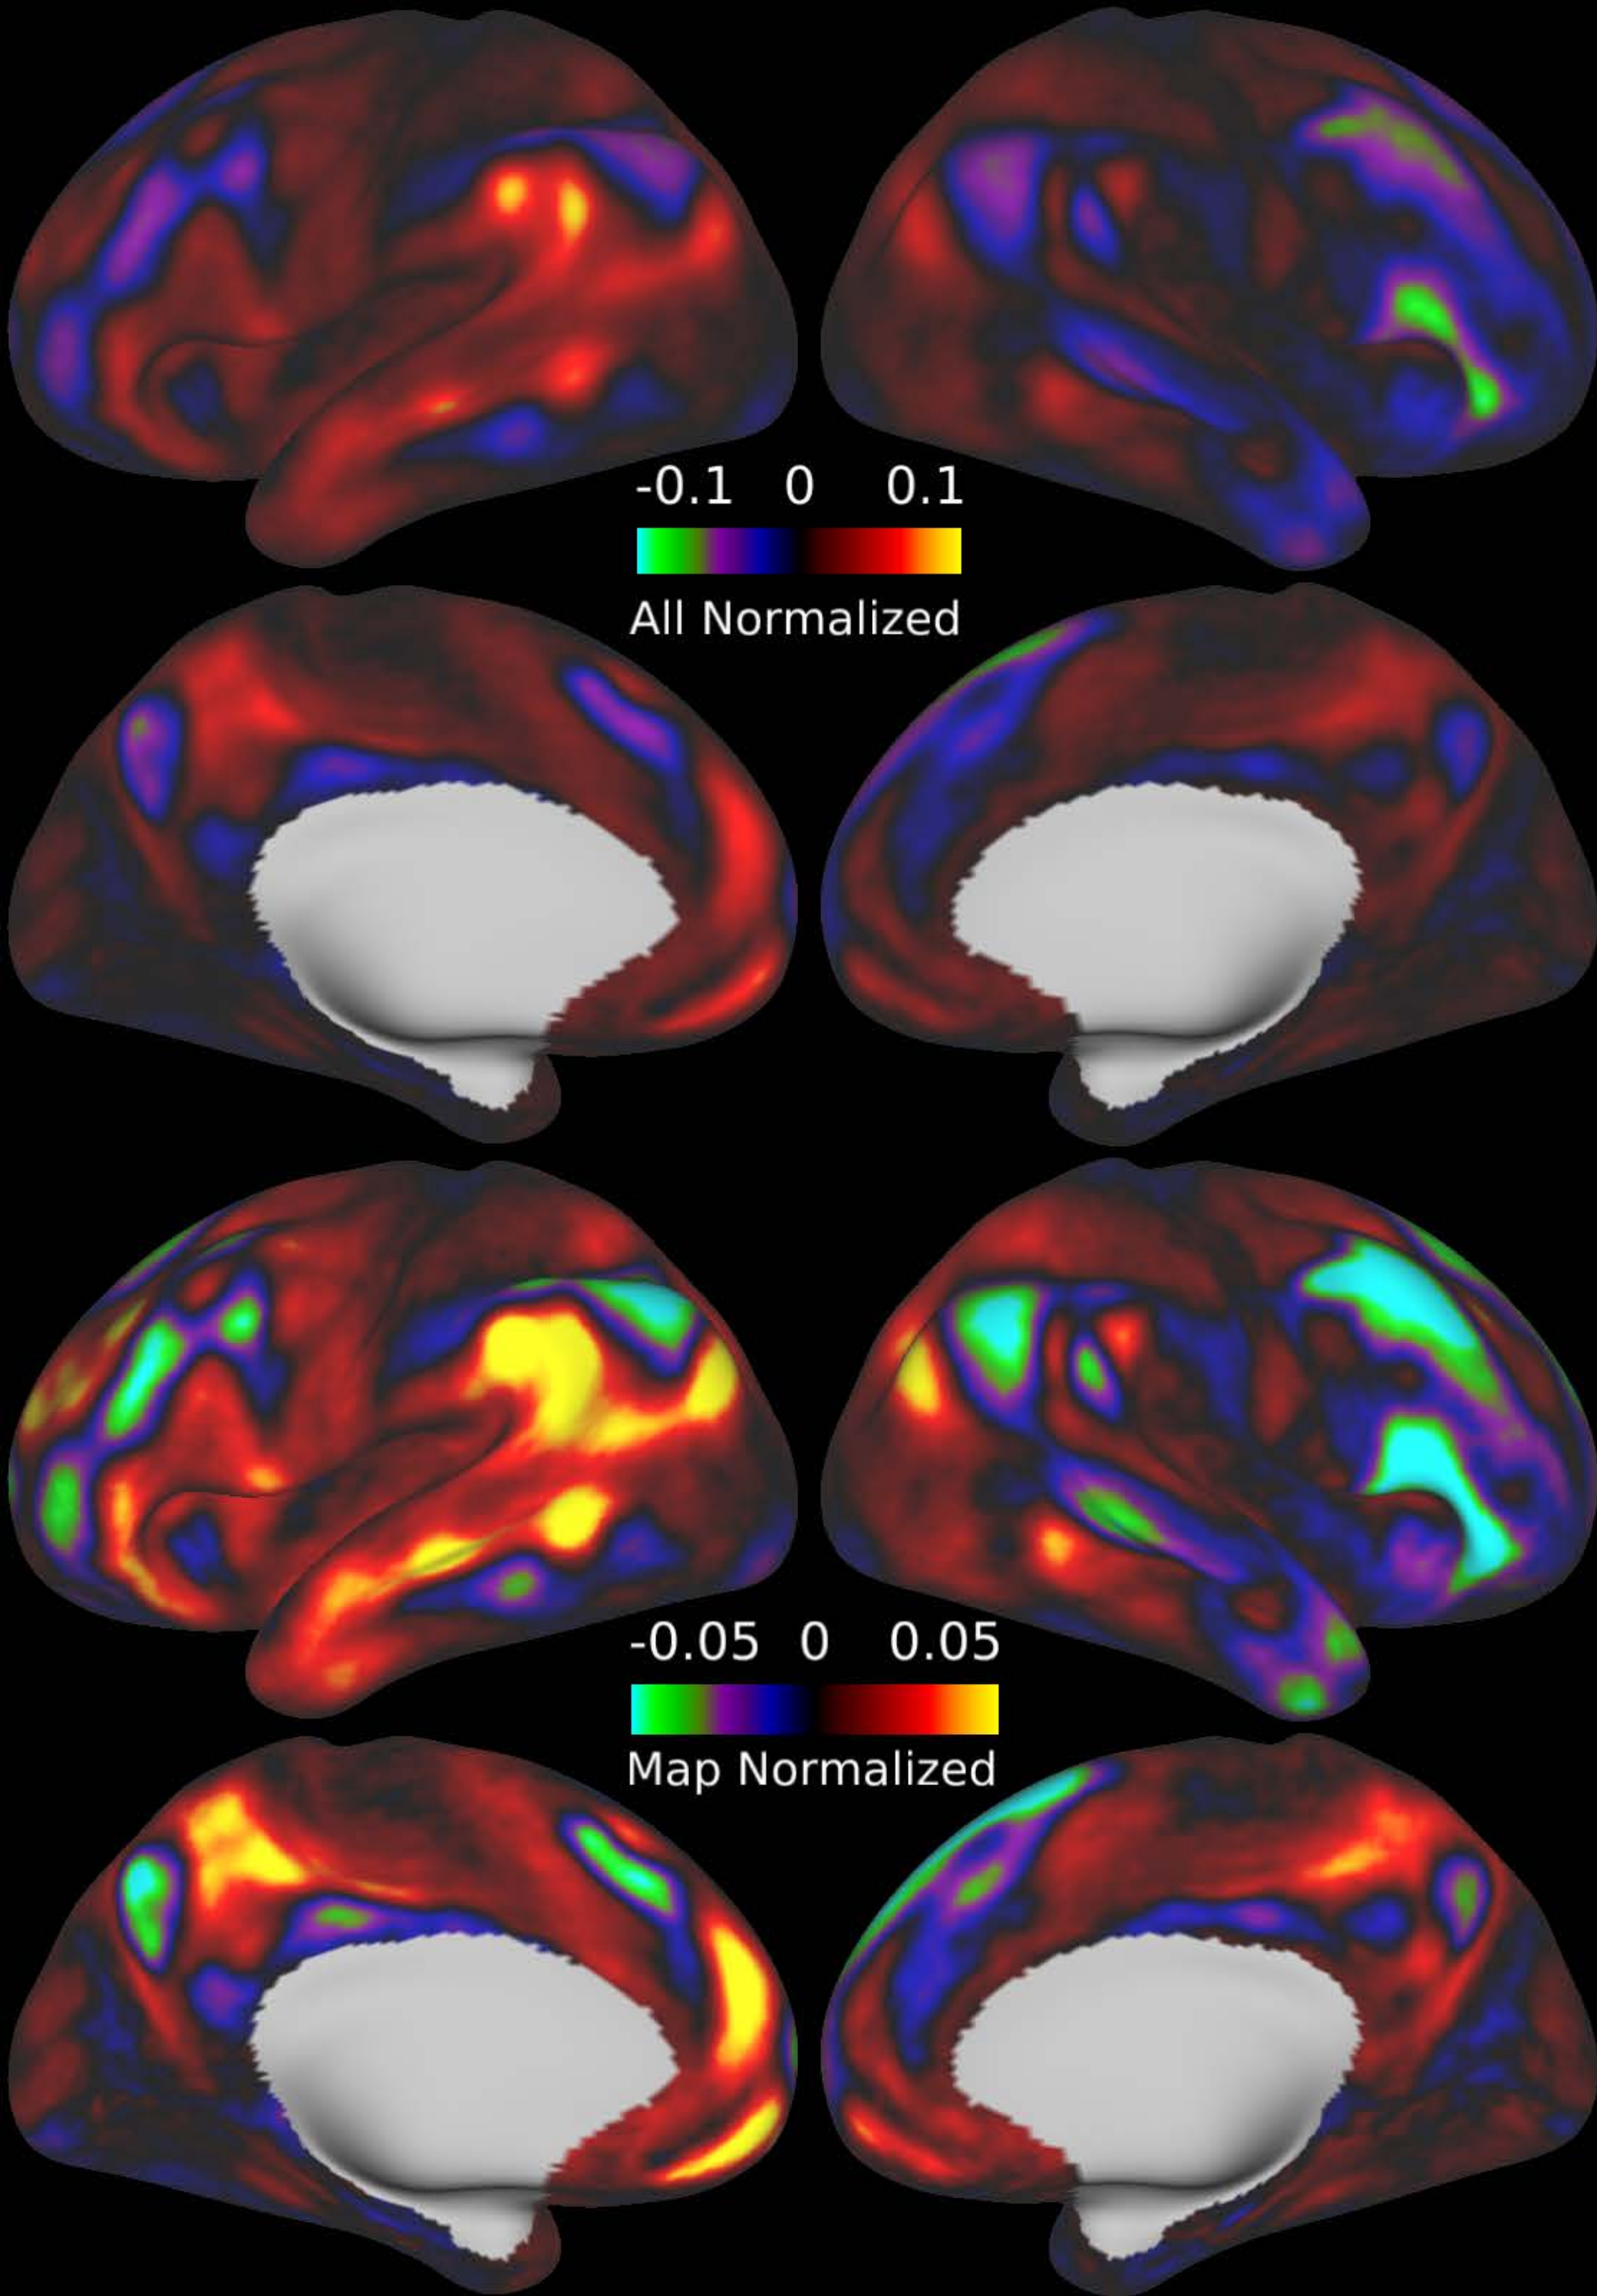

Hertz

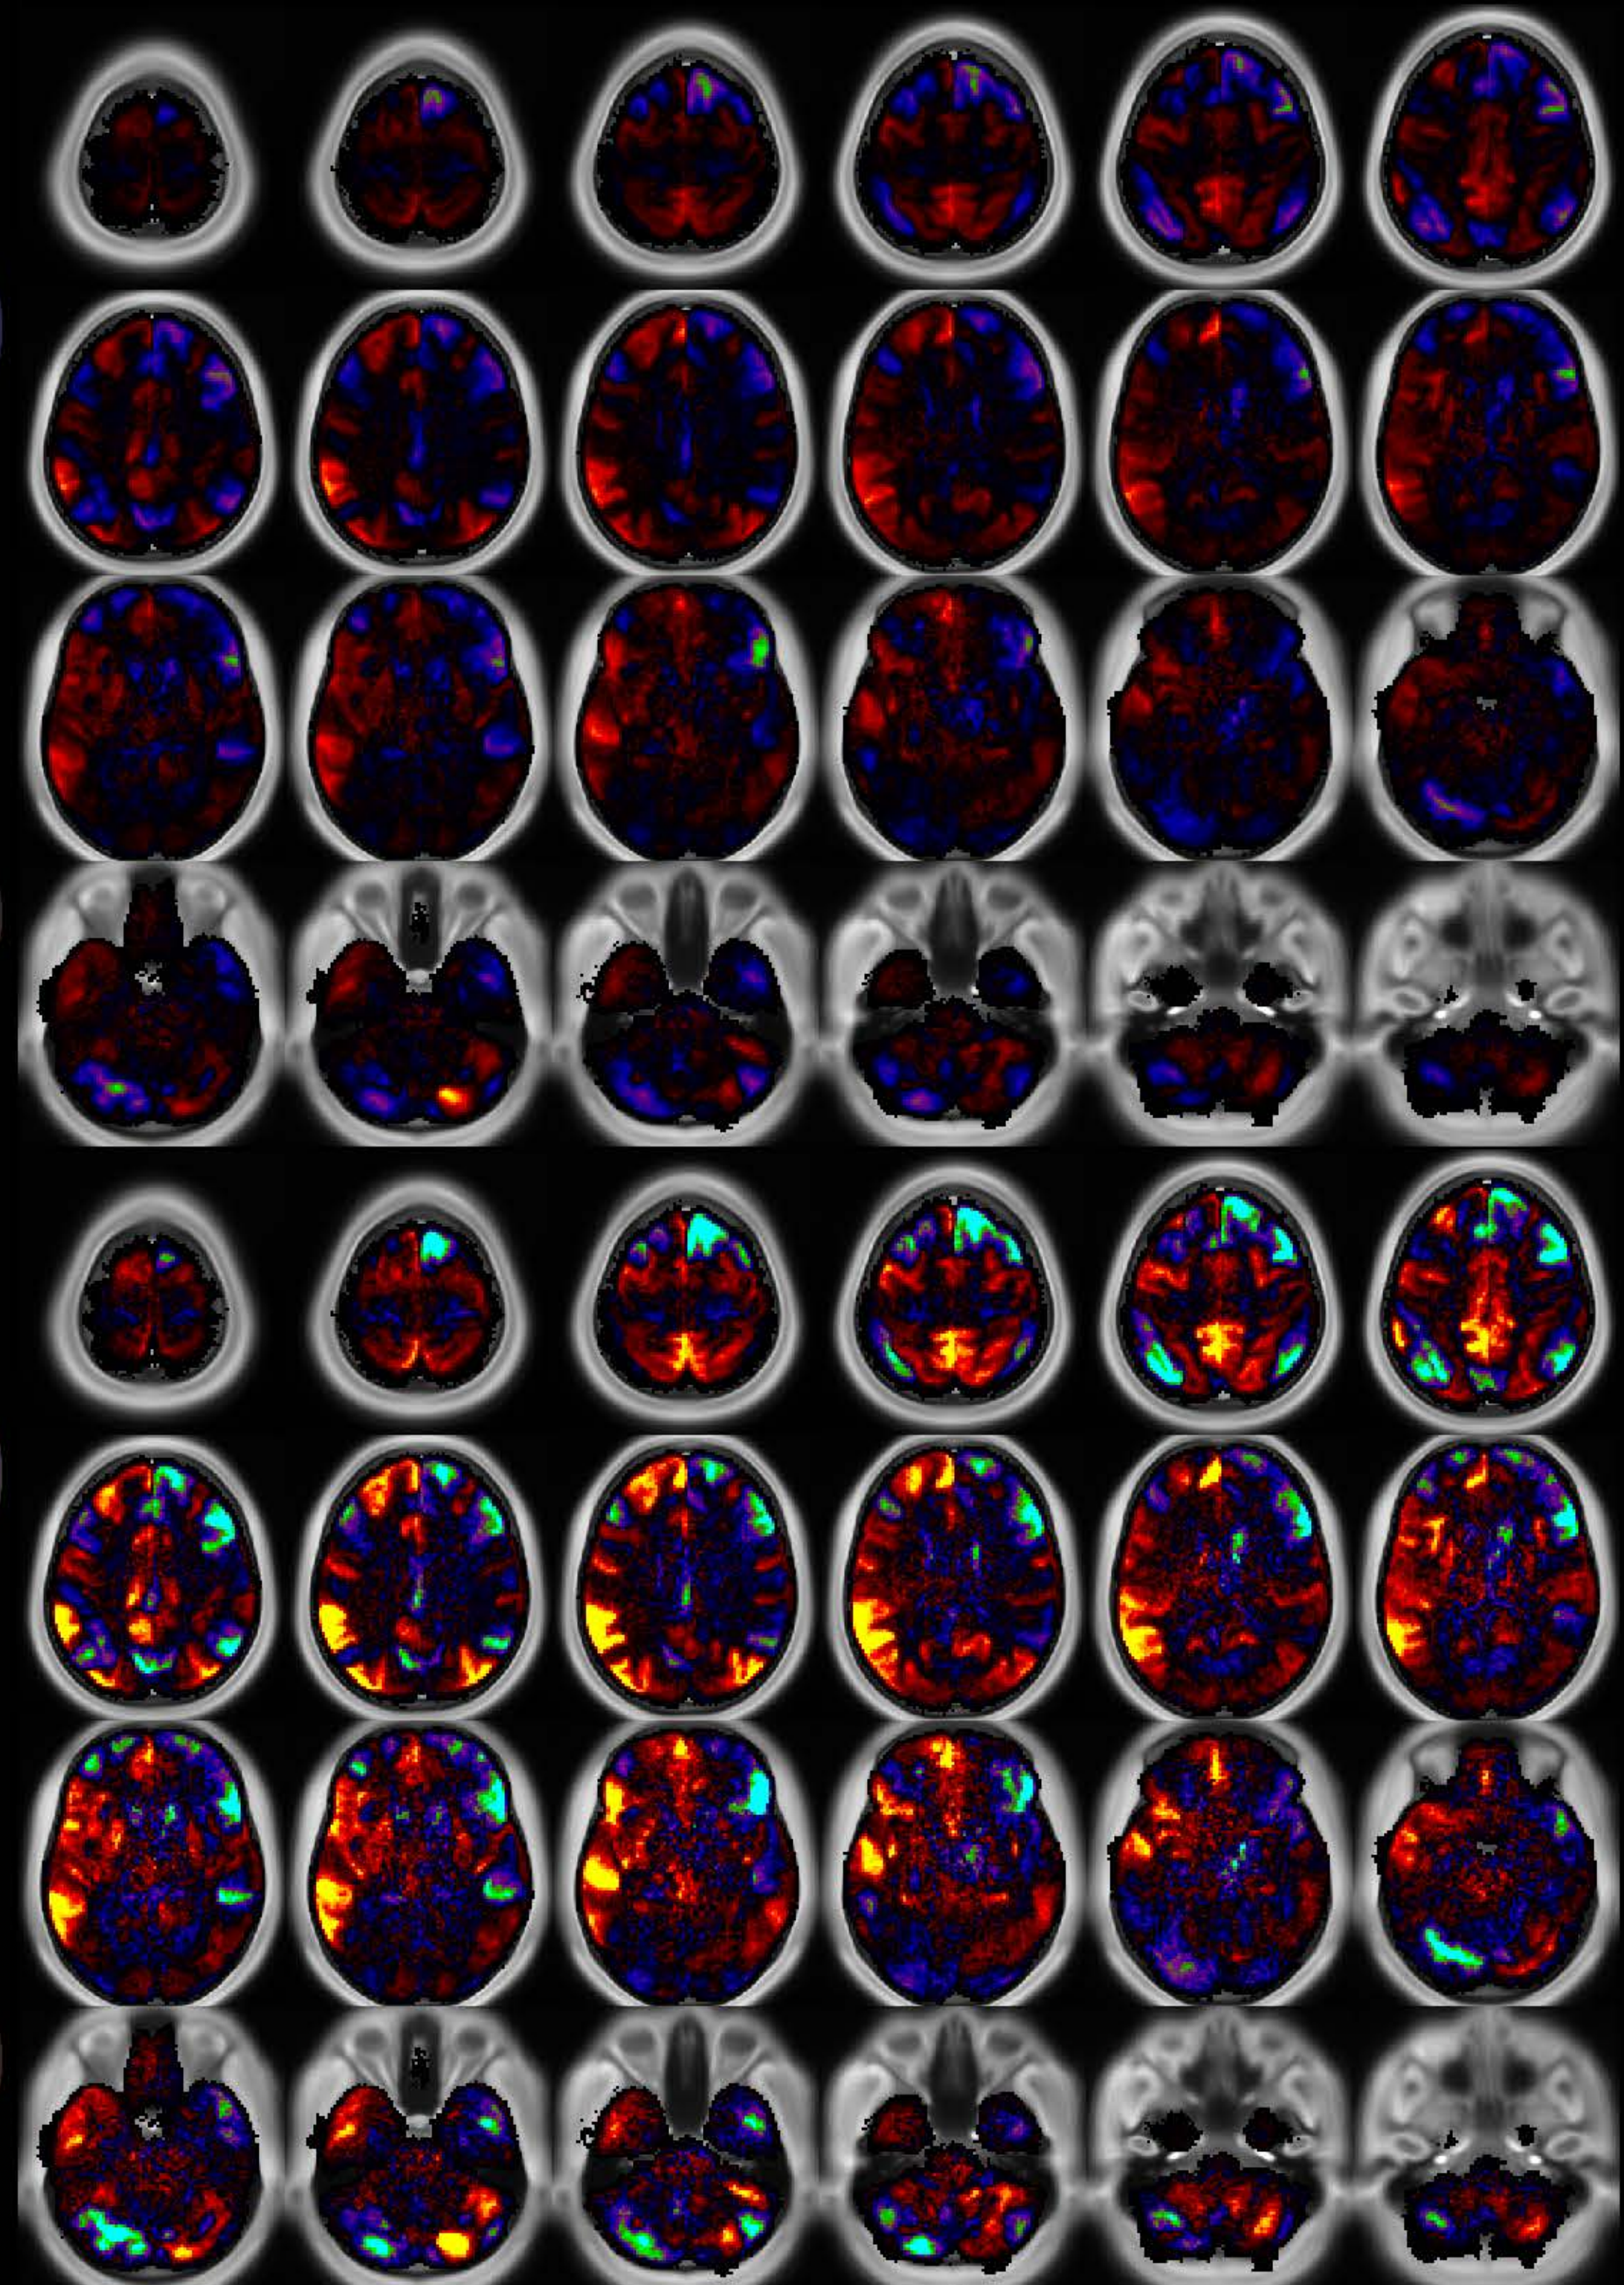

Seconds

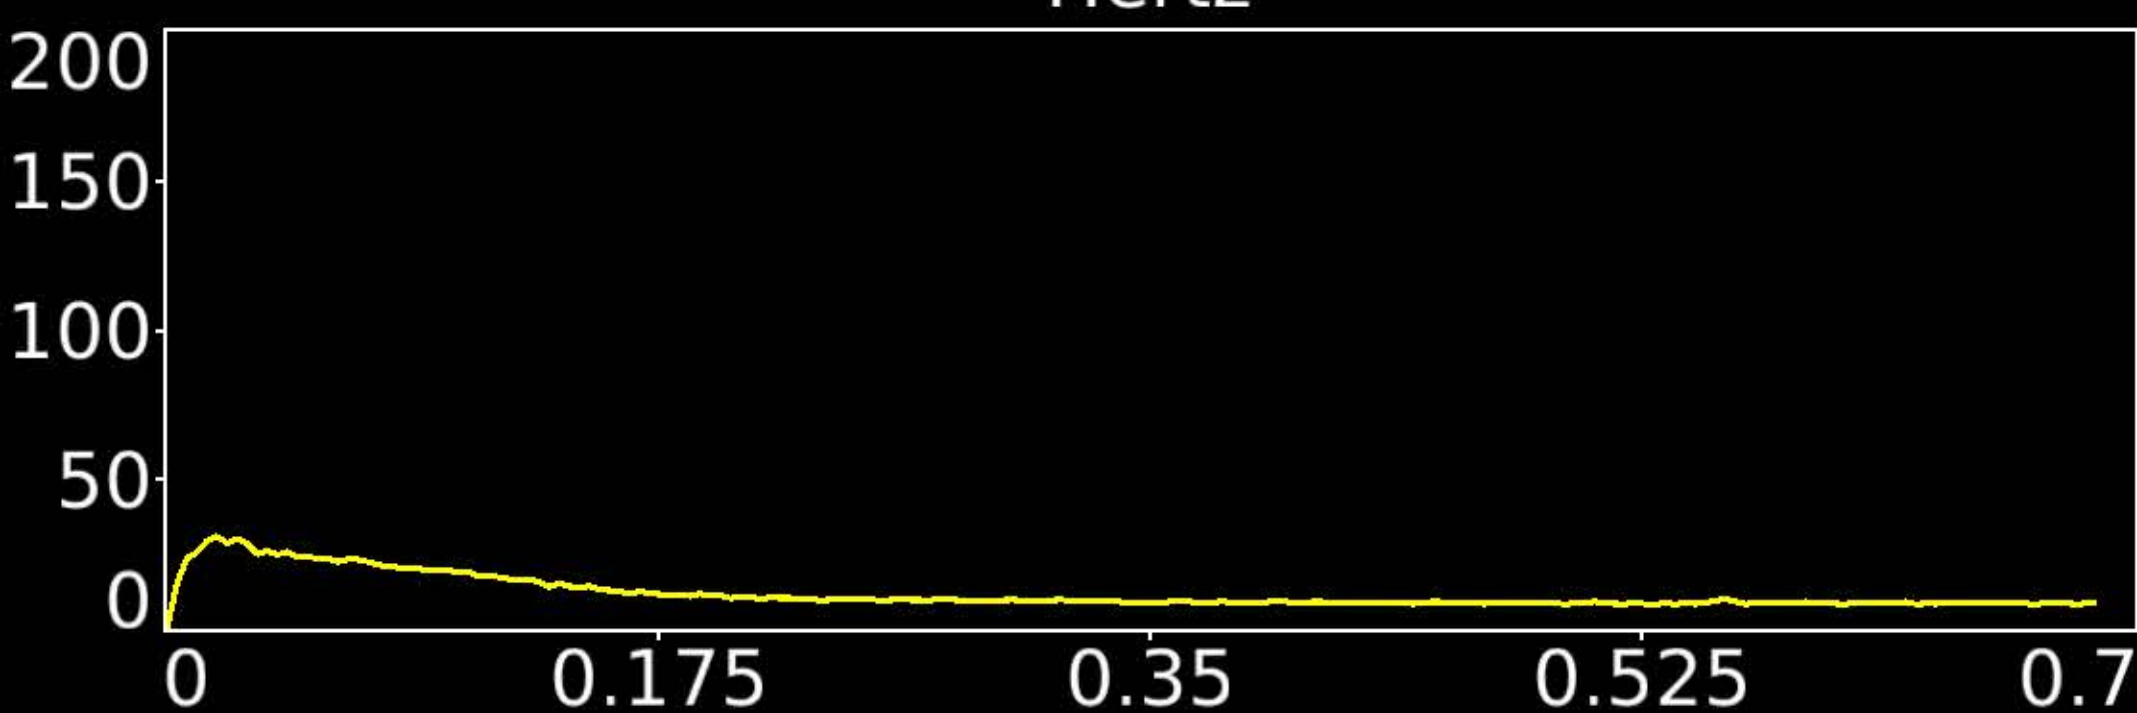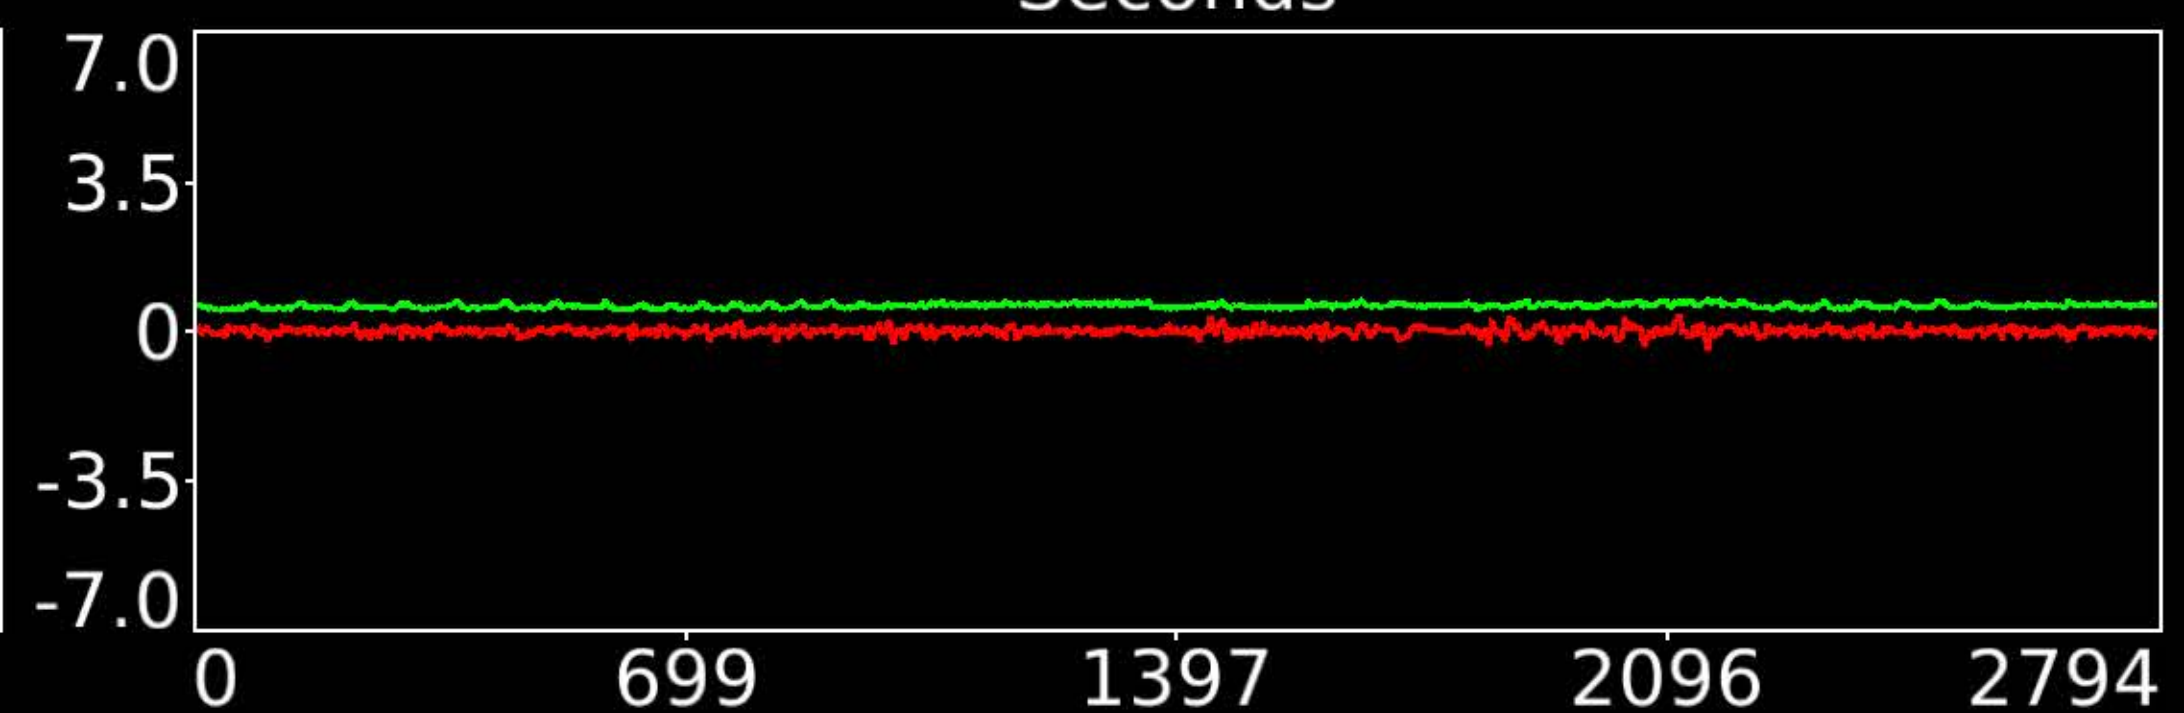

|                           |                            |                             |  |
|---------------------------|----------------------------|-----------------------------|--|
| Number & Class: 63 Signal |                            | Name: Unknown L > R Network |  |
| RVT Correlated: No        | DVARS Dip Associated: No   | Cross-Subject Variable: No  |  |
| Single Subject: No        | % Variance Explained: 0.59 | Globality Index: 0.64       |  |
| Rest Component: No        | Taskr Component: No        | Task Modulated: No          |  |

Rationale: Spatial map includes positive and negative patches that respect known areal boundaries (e.g. POS2; 44; 45)



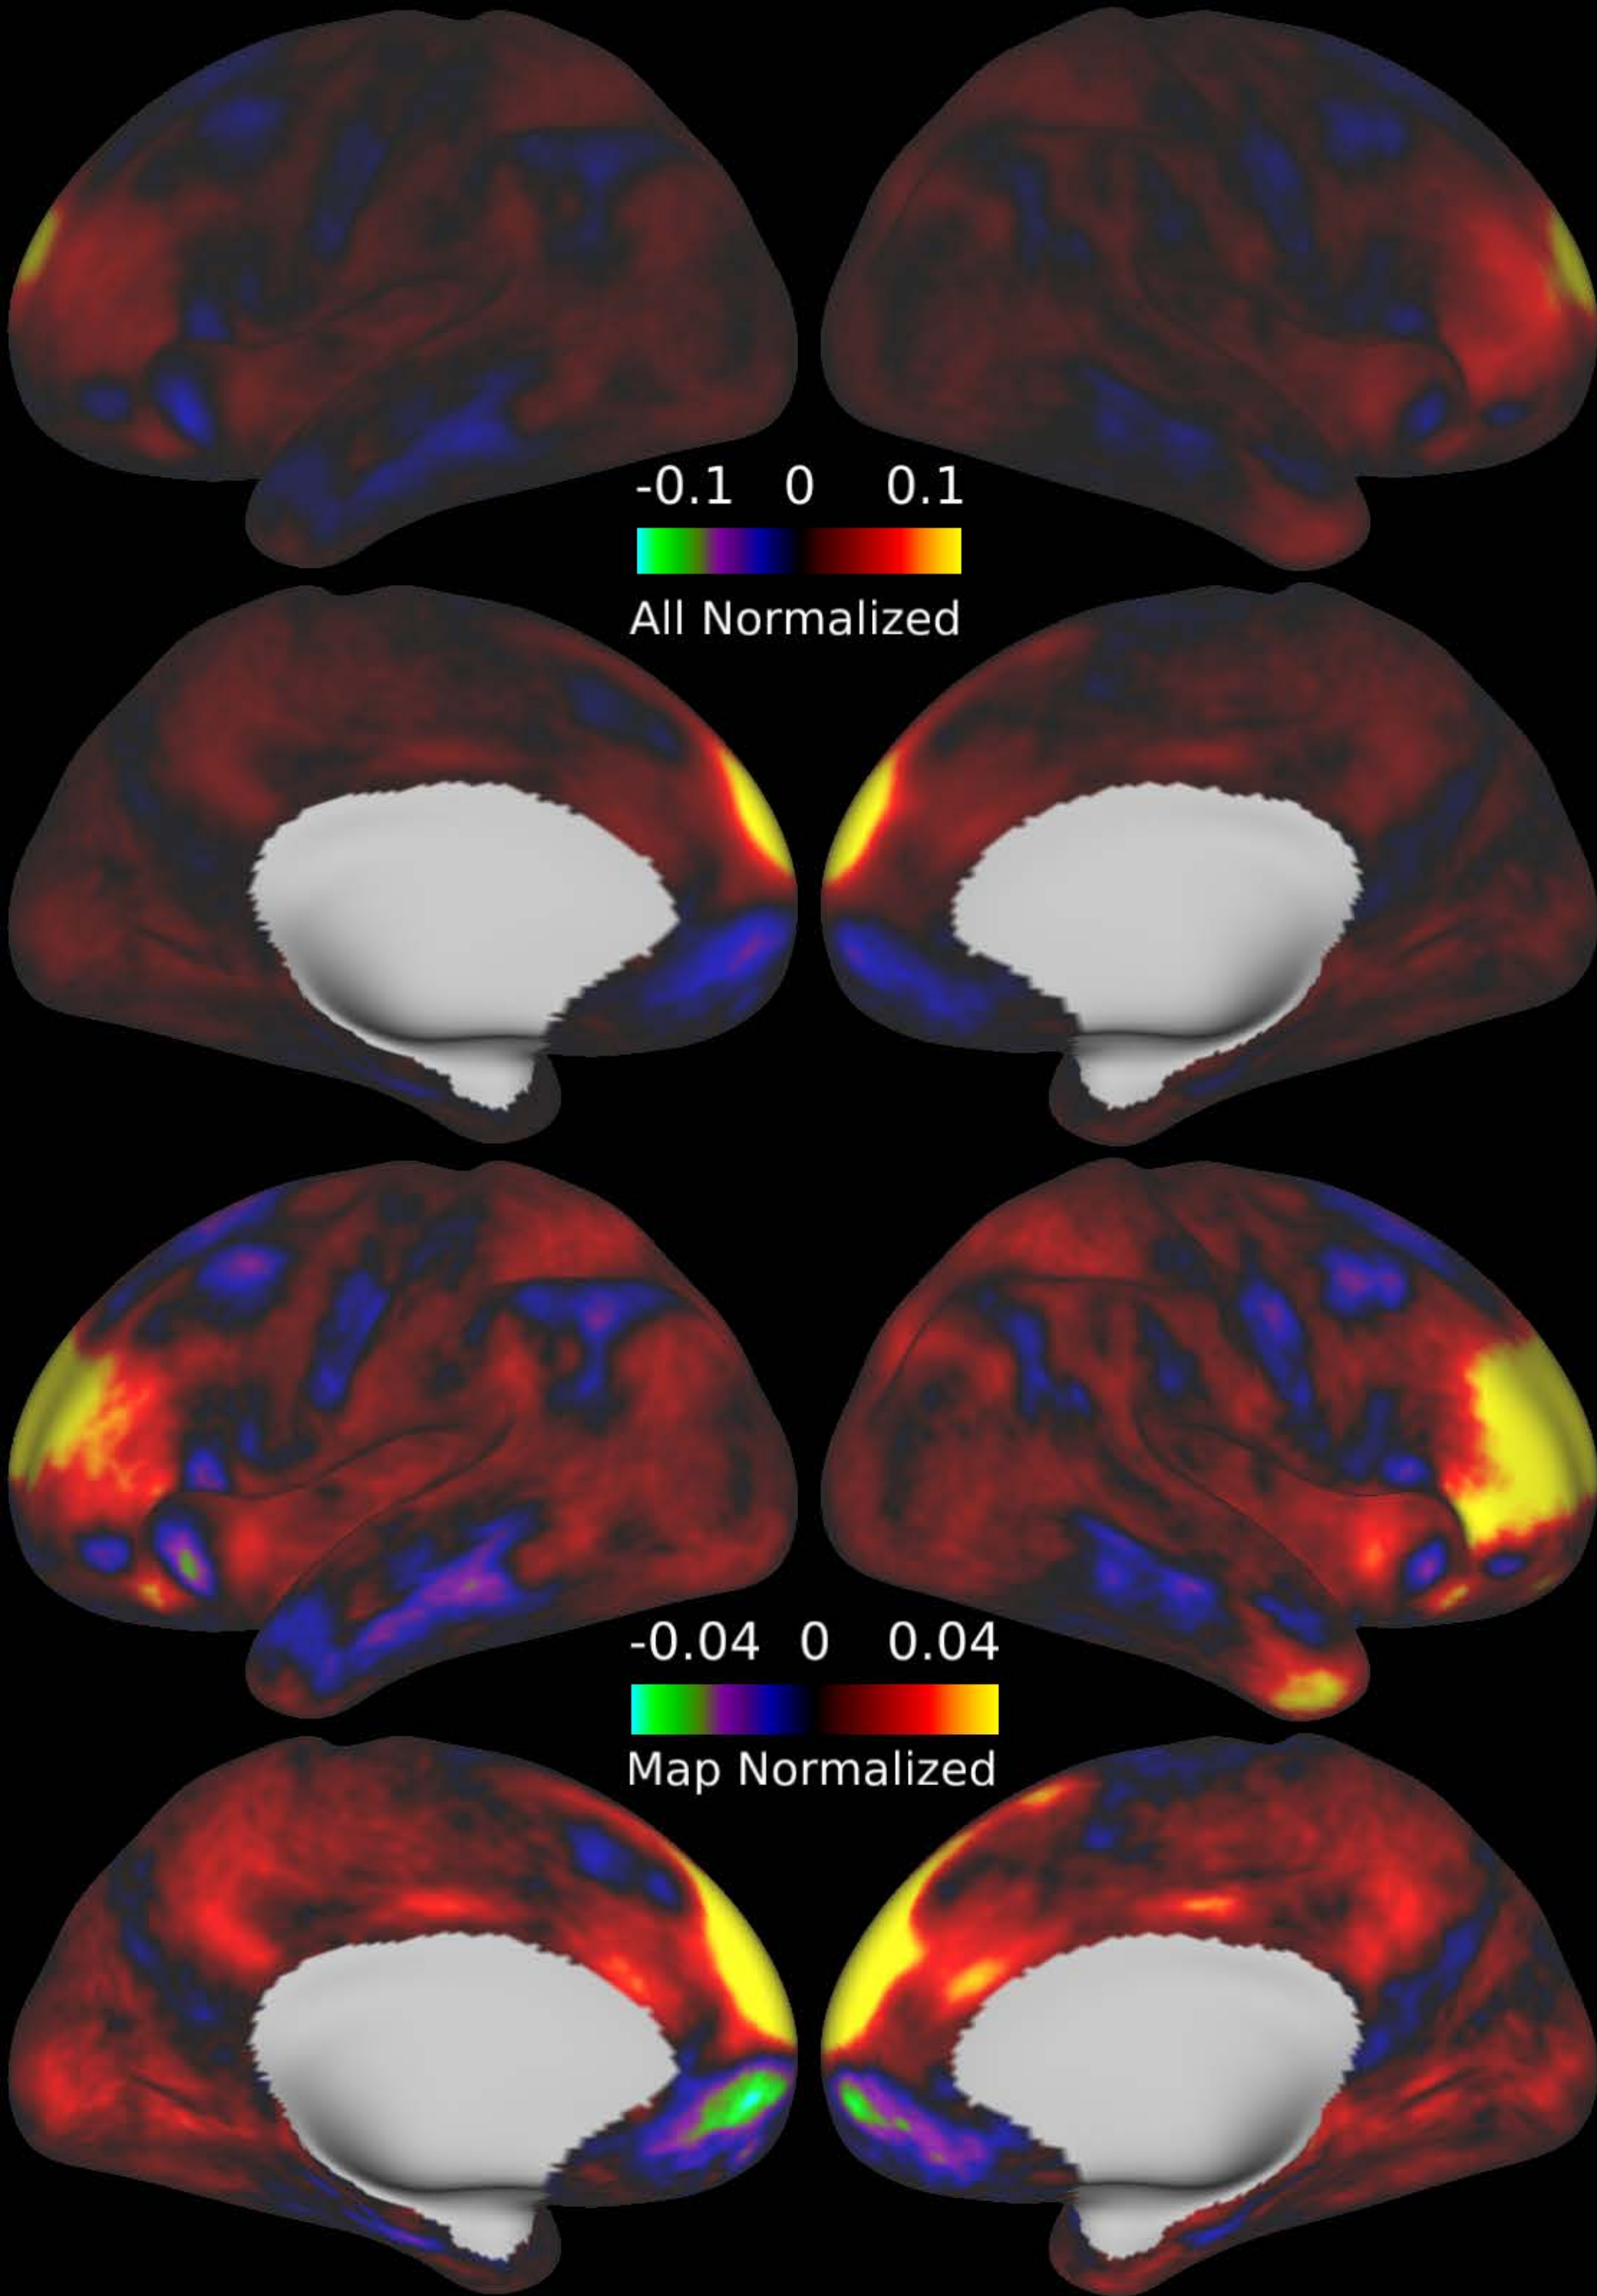

Hertz

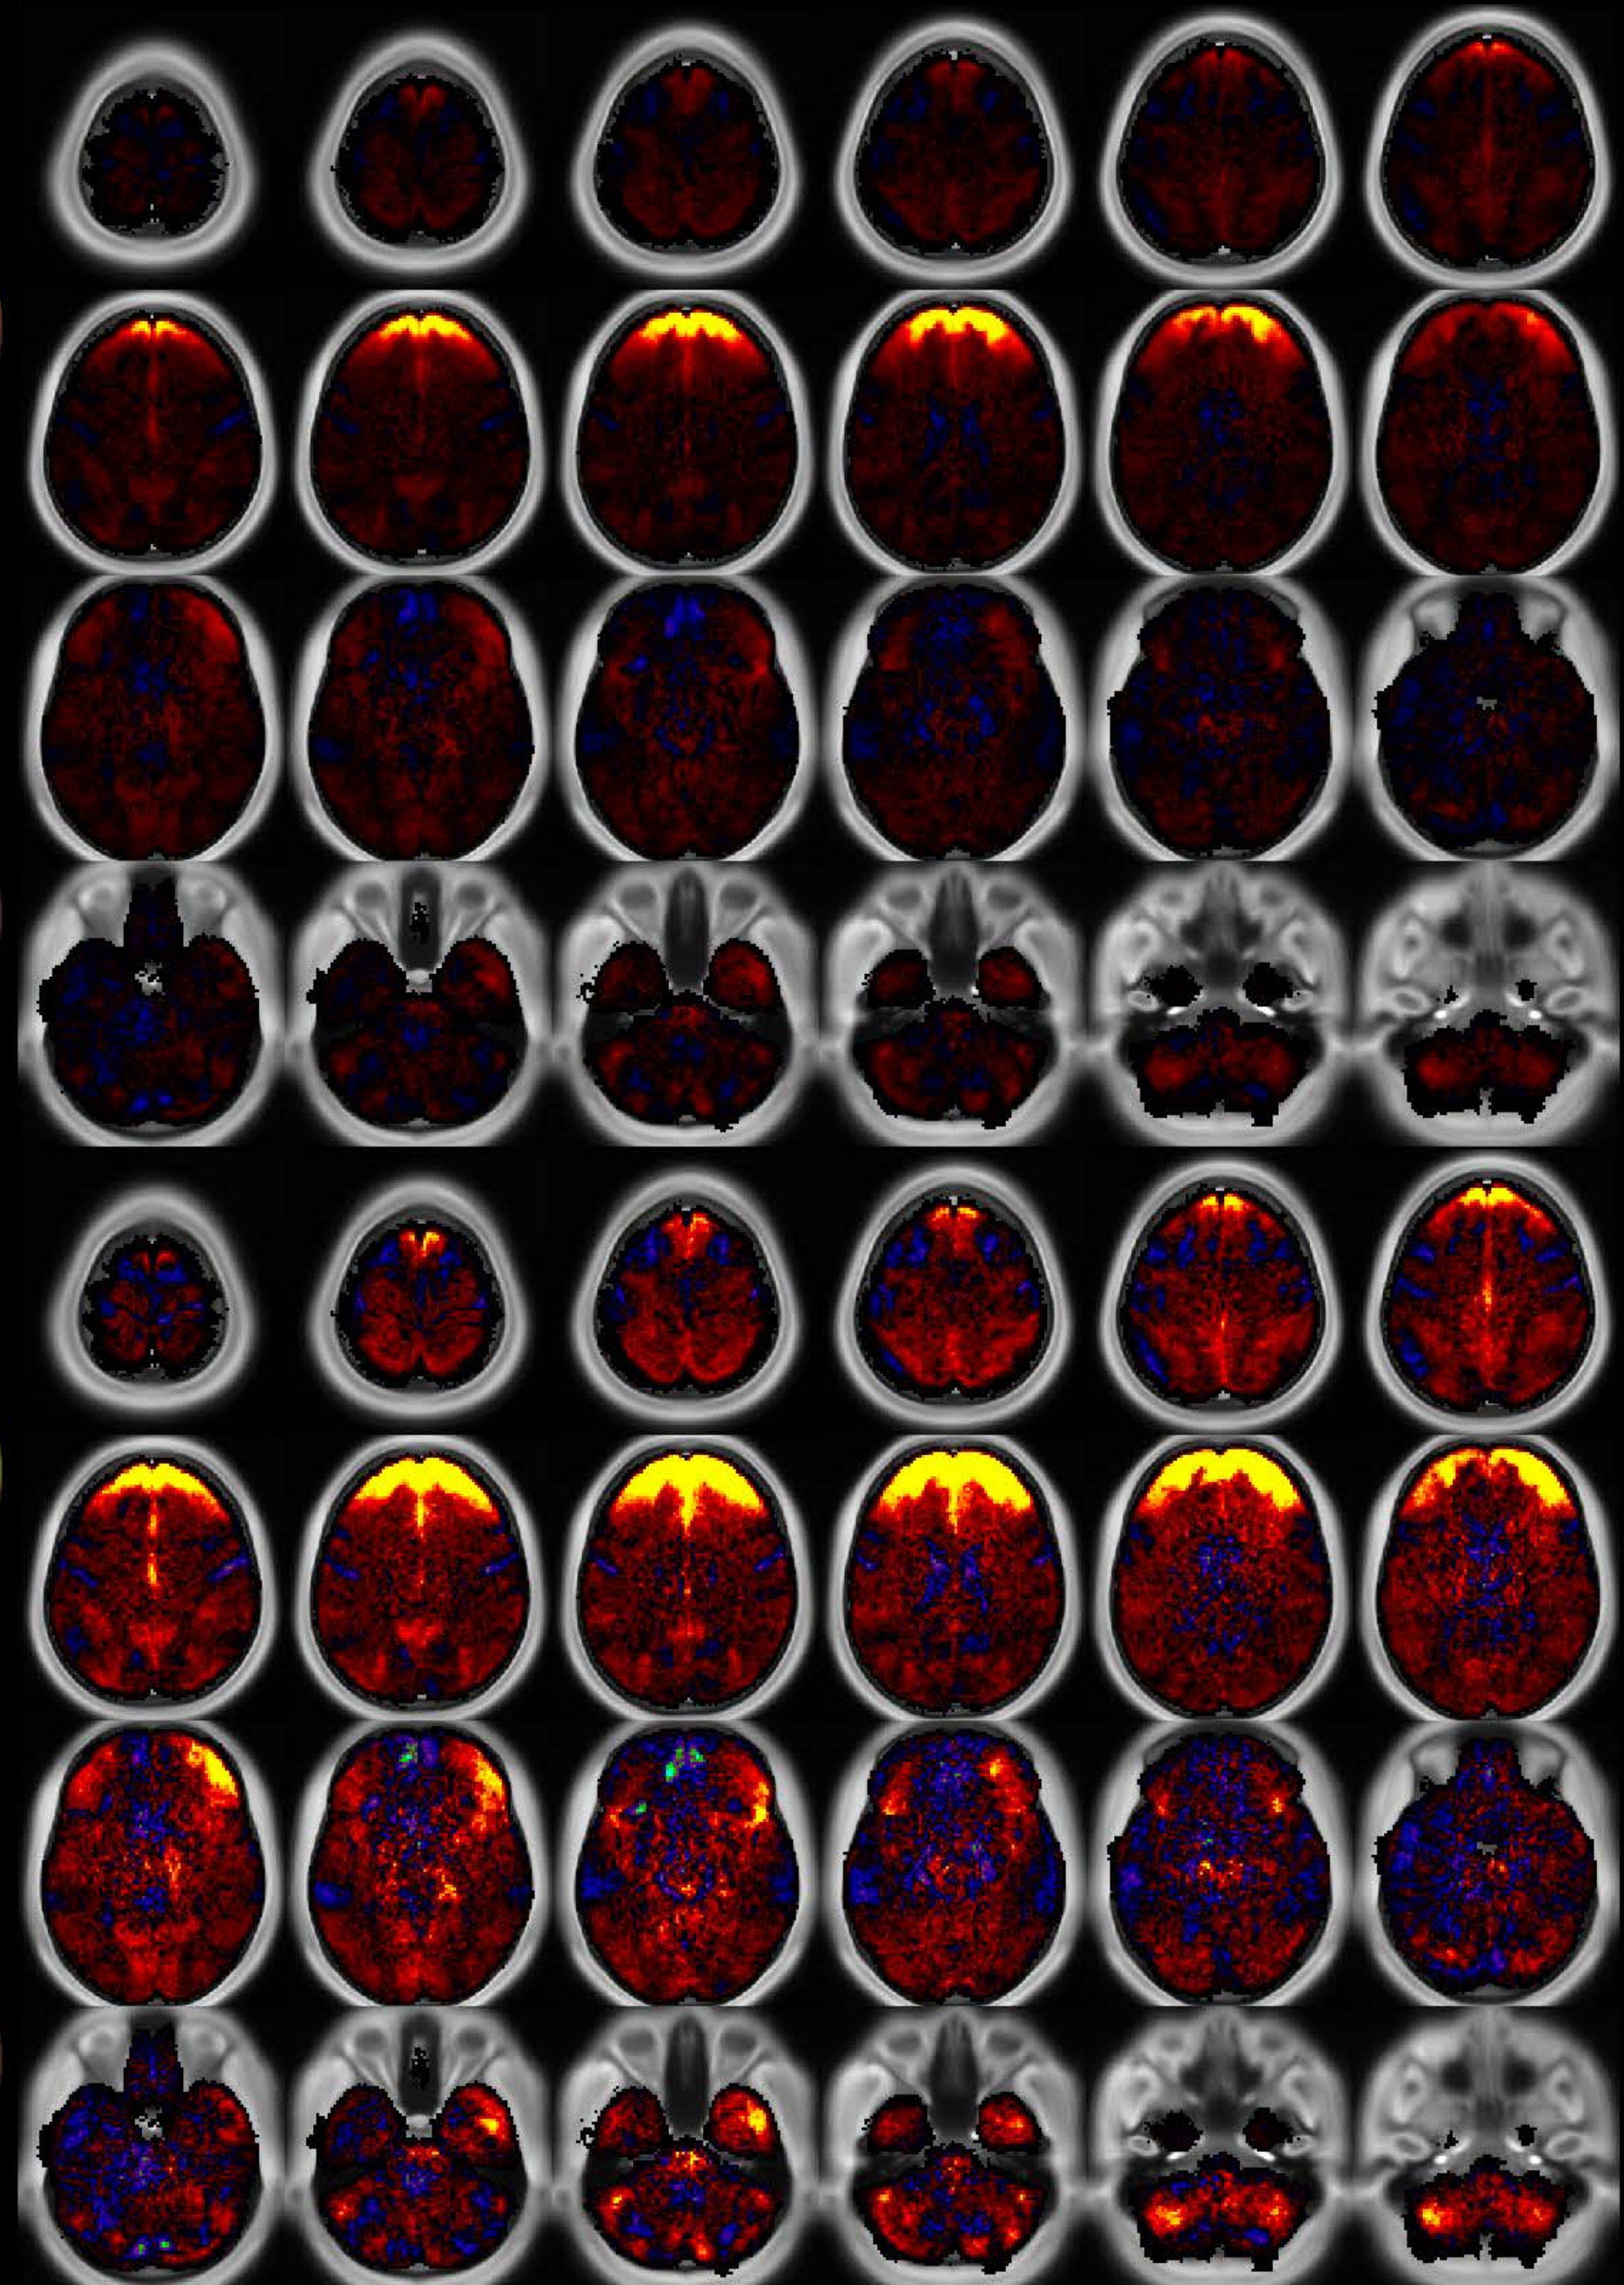

Seconds

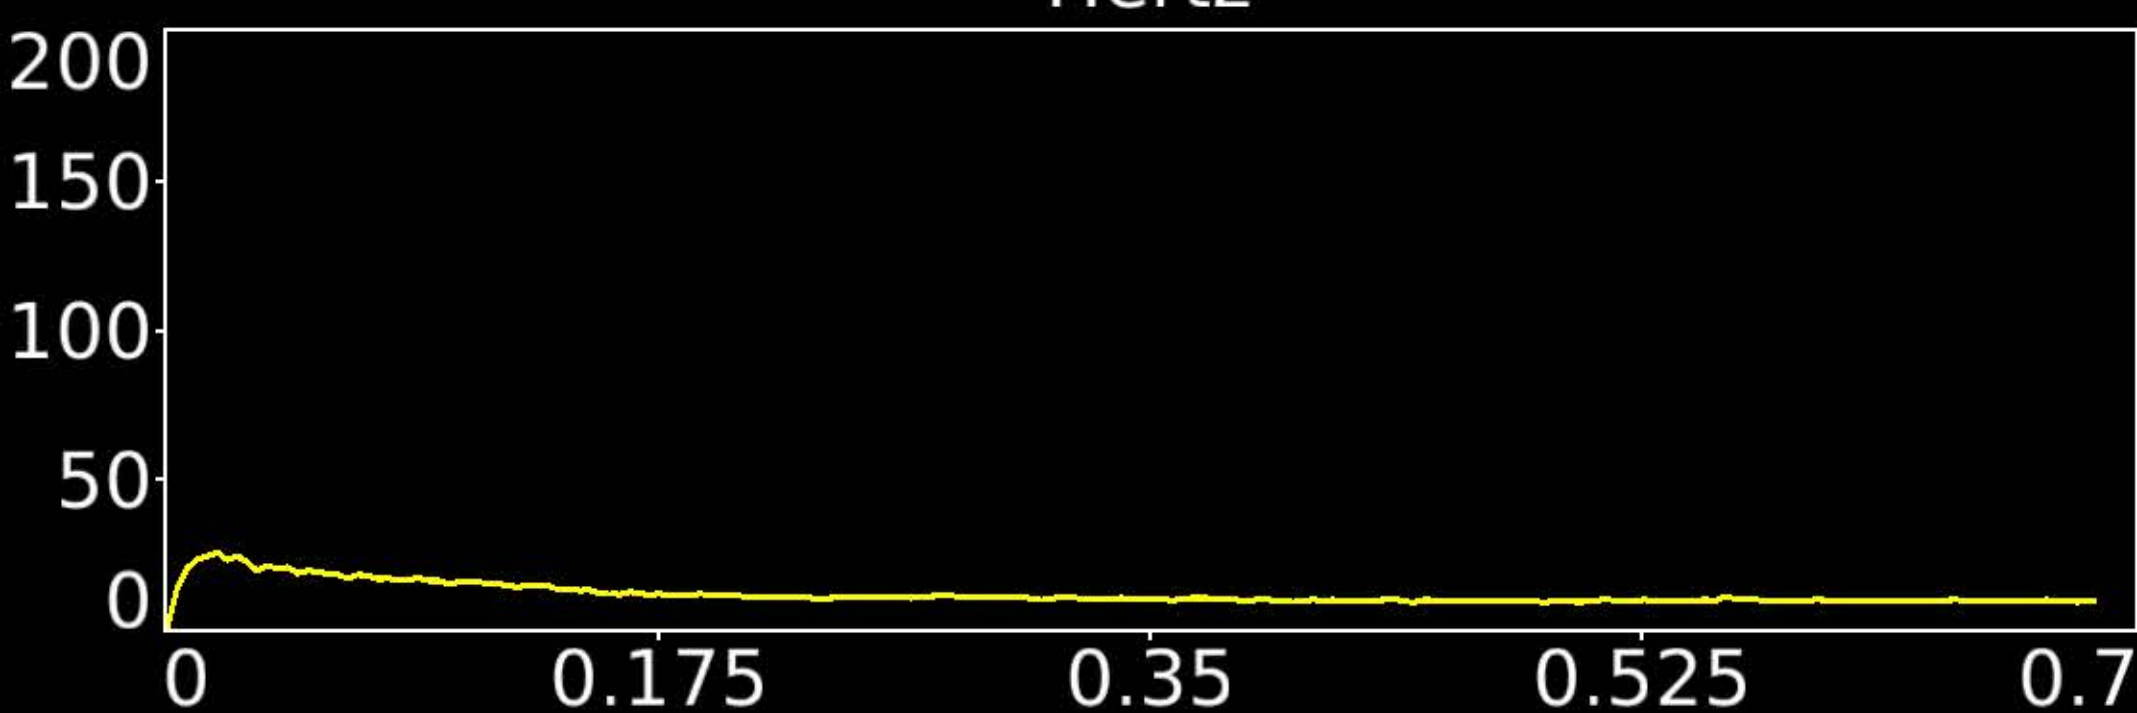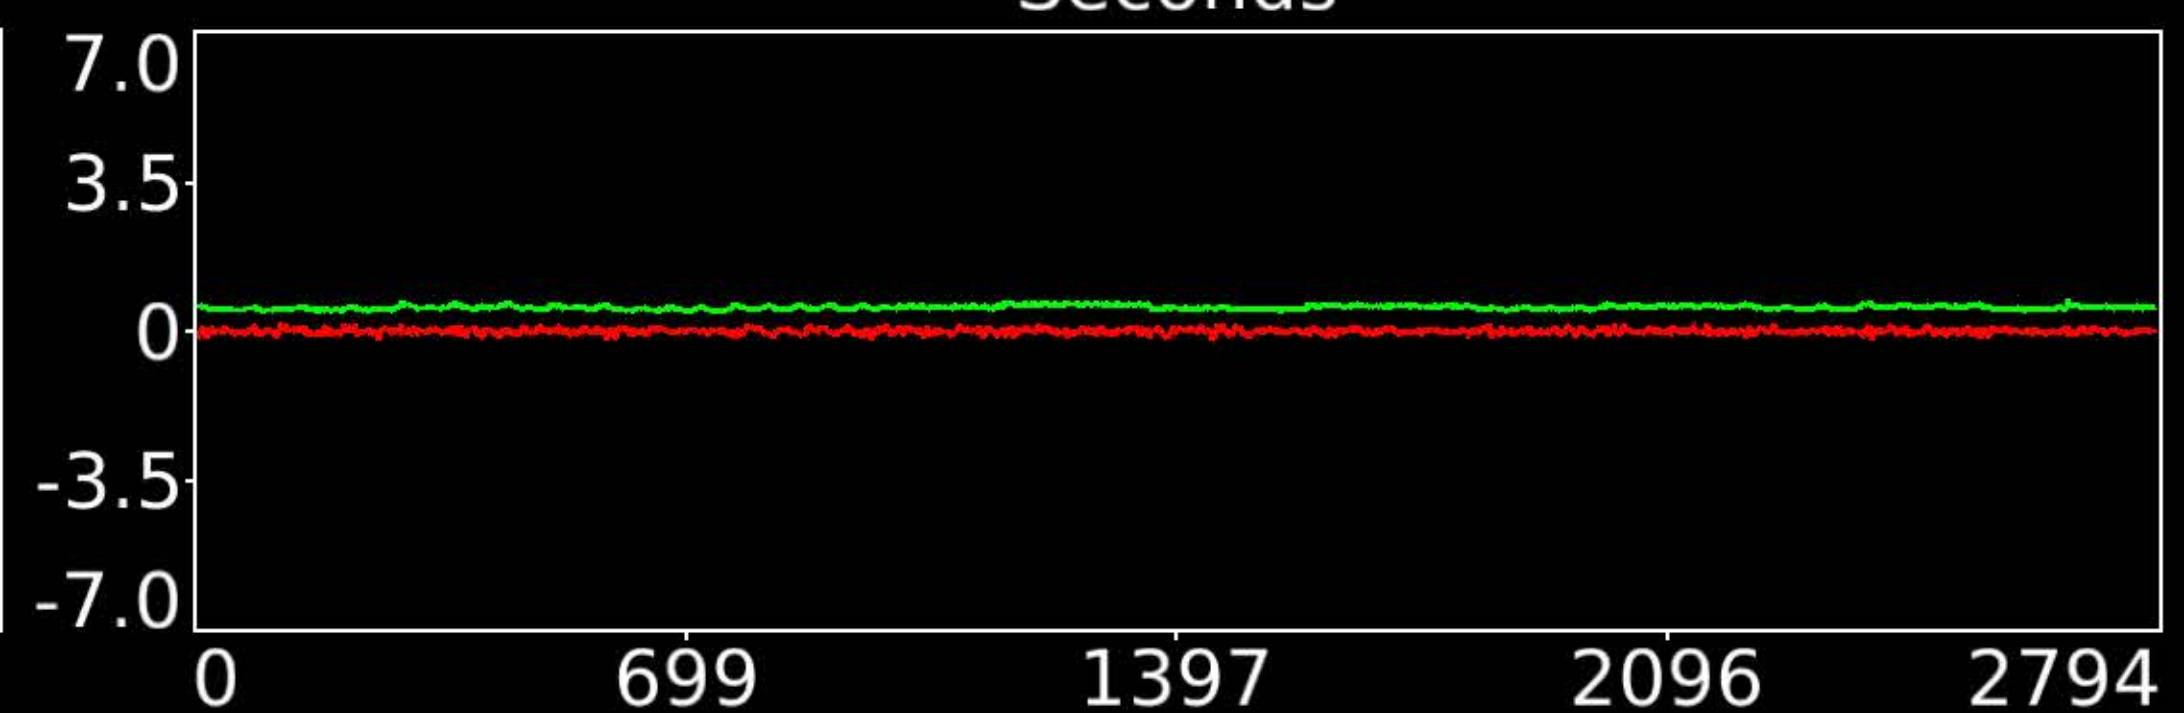

|                          |                            |                             |  |
|--------------------------|----------------------------|-----------------------------|--|
| Number & Class: 64 Noise |                            | Name: Coil?                 |  |
| RVT Correlated: No       | DVARS Dip Associated: Yes  | Cross-Subject Variable: Yes |  |
| Single Subject: Yes      | % Variance Explained: 0.54 | Globality Index: 1.82       |  |
| Rest Component: 70       | Taskr Component: 55        | Task Modulated: No          |  |

Rationale: Spatial map is a band across frontal cortex and white matter; could be related to coil; head motion; or eye motion



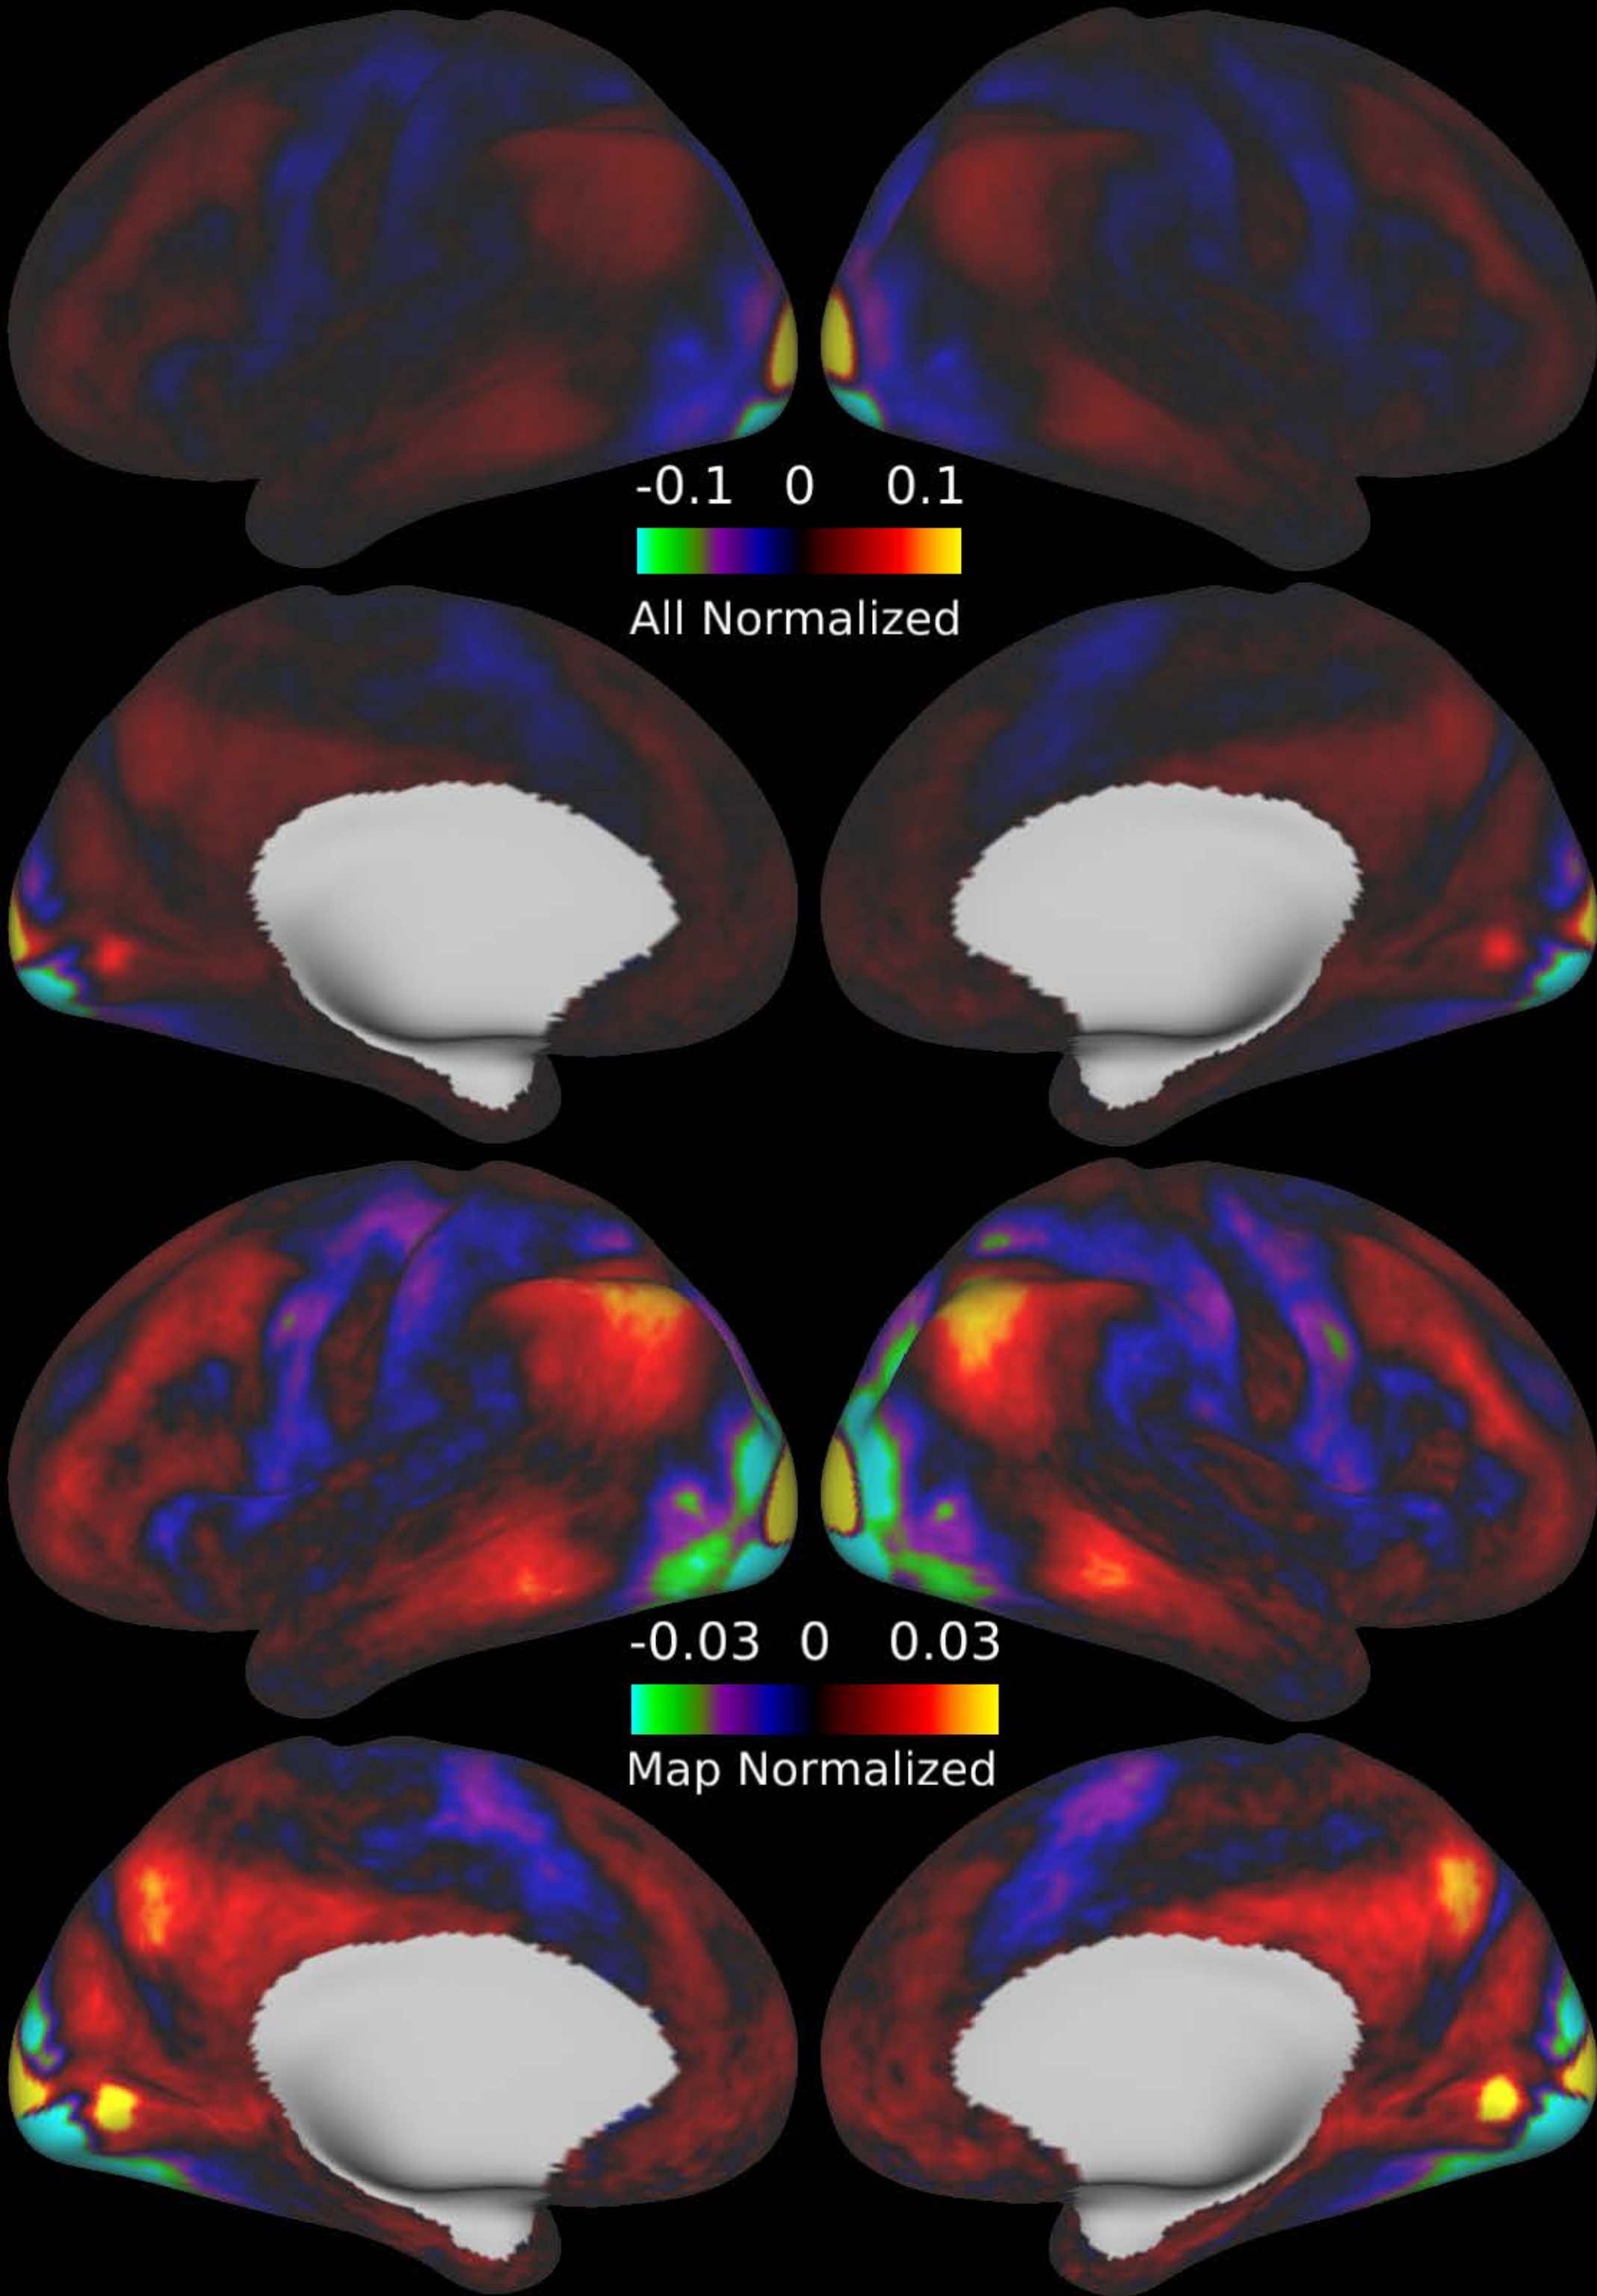

Hertz

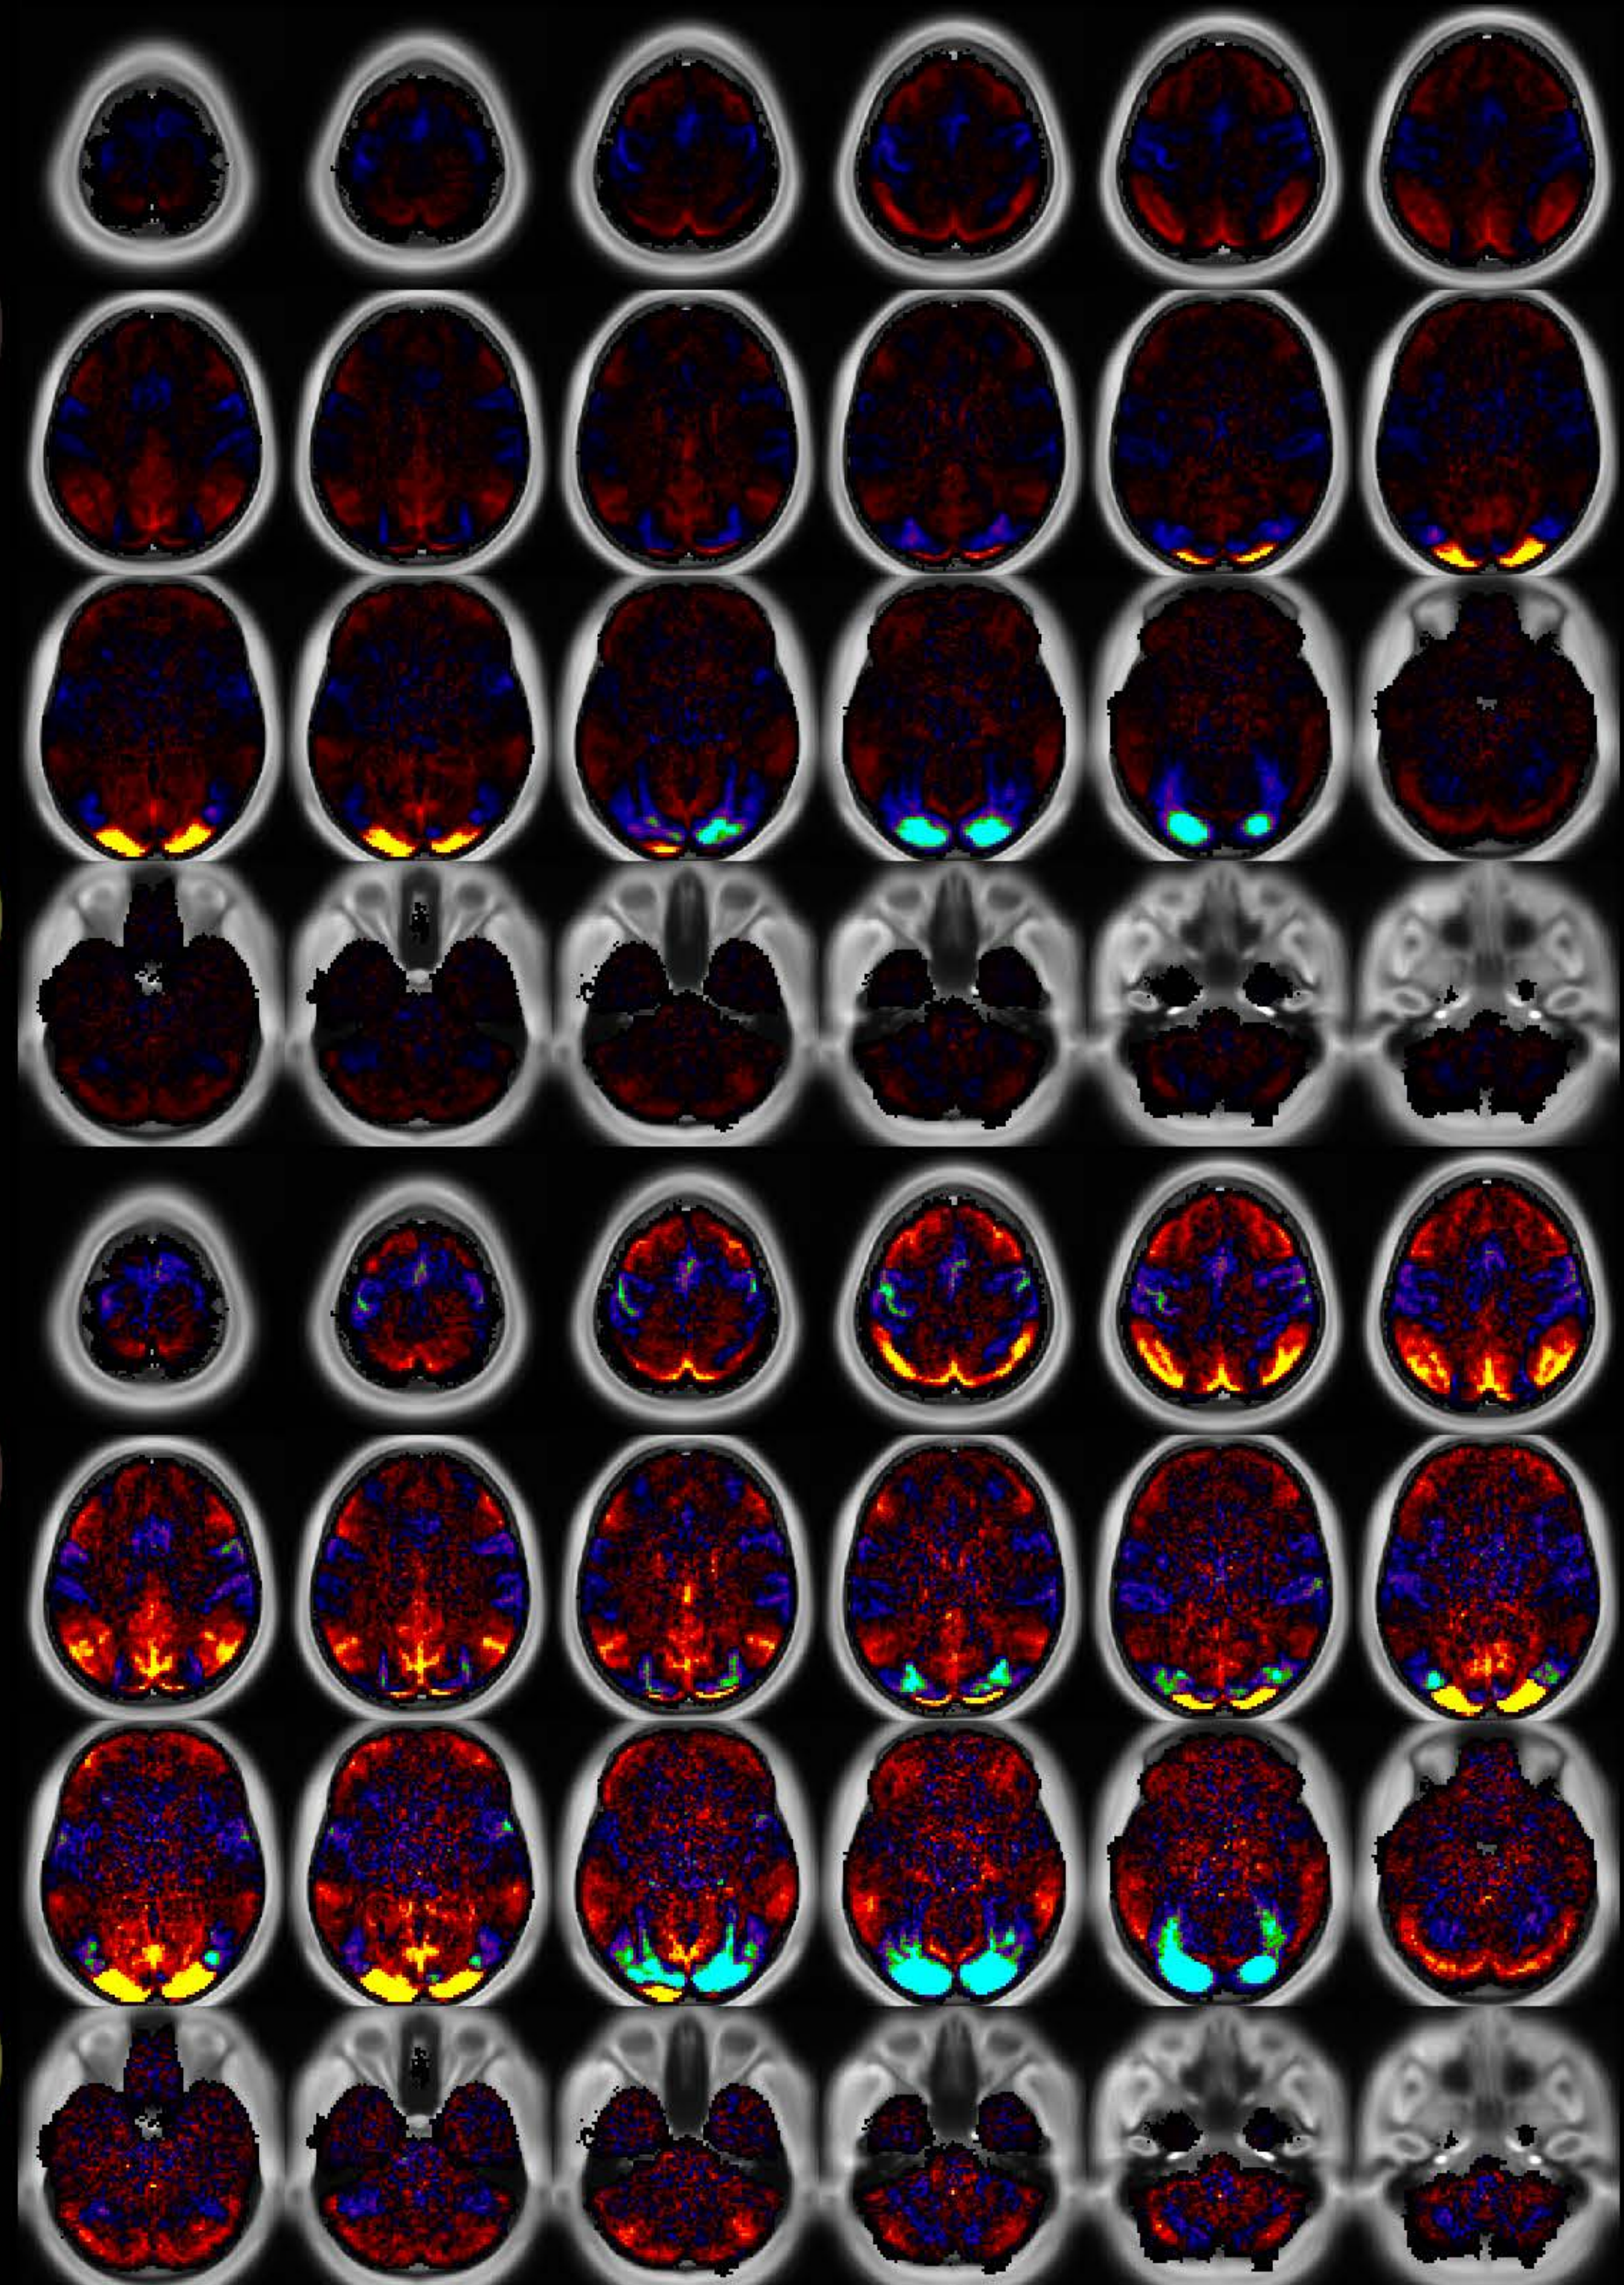

Seconds

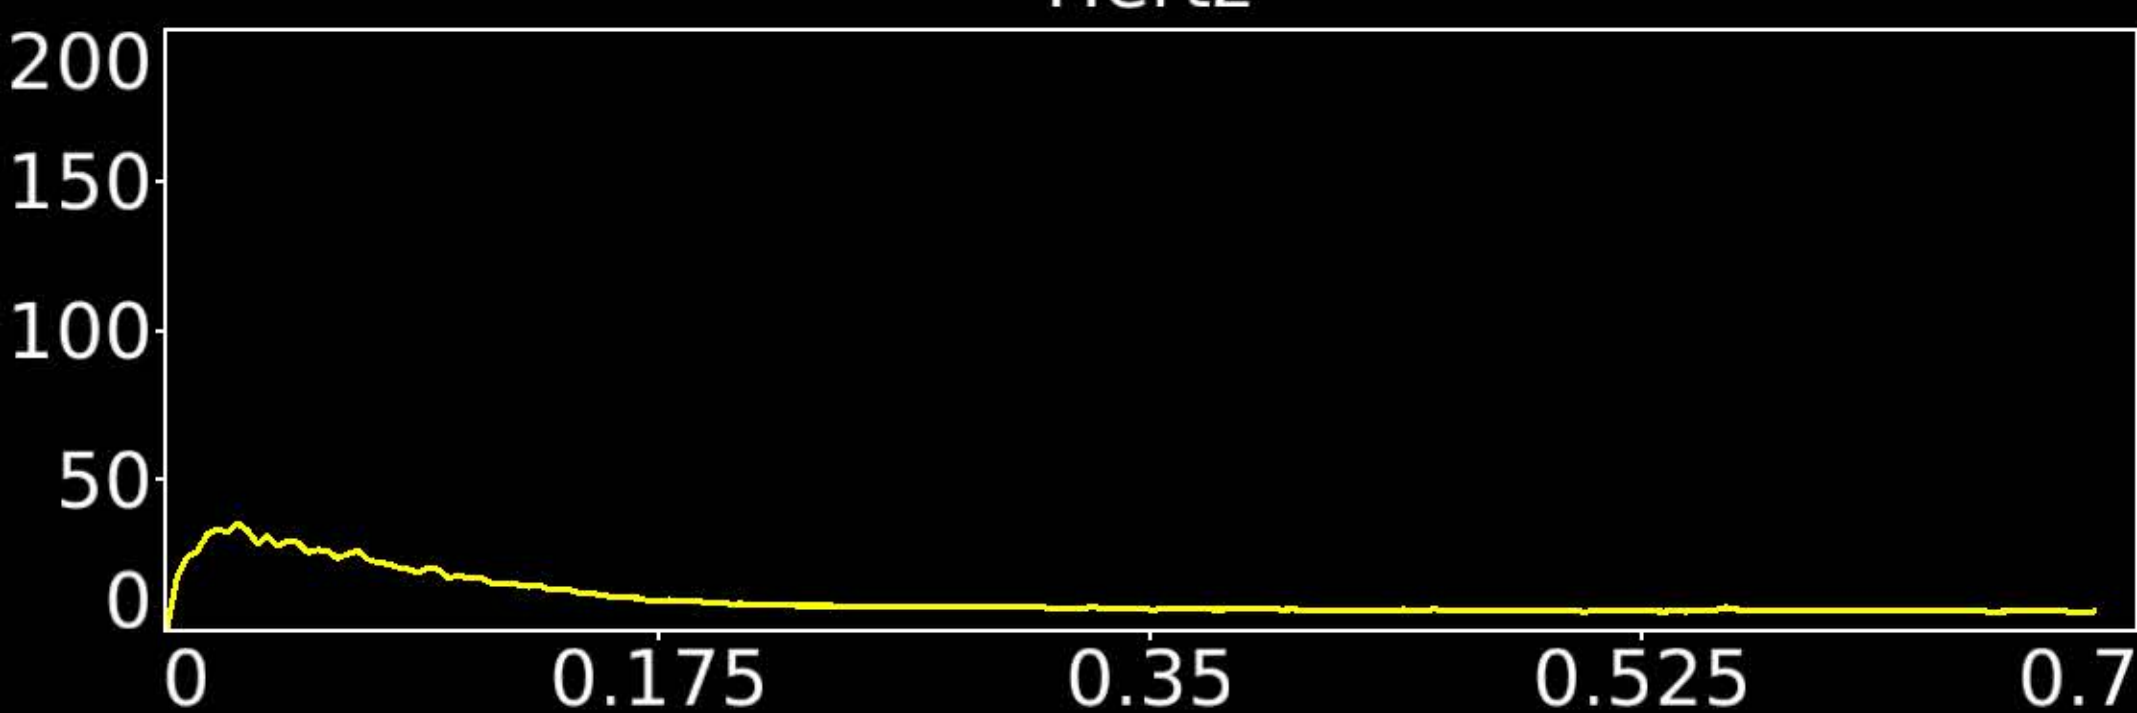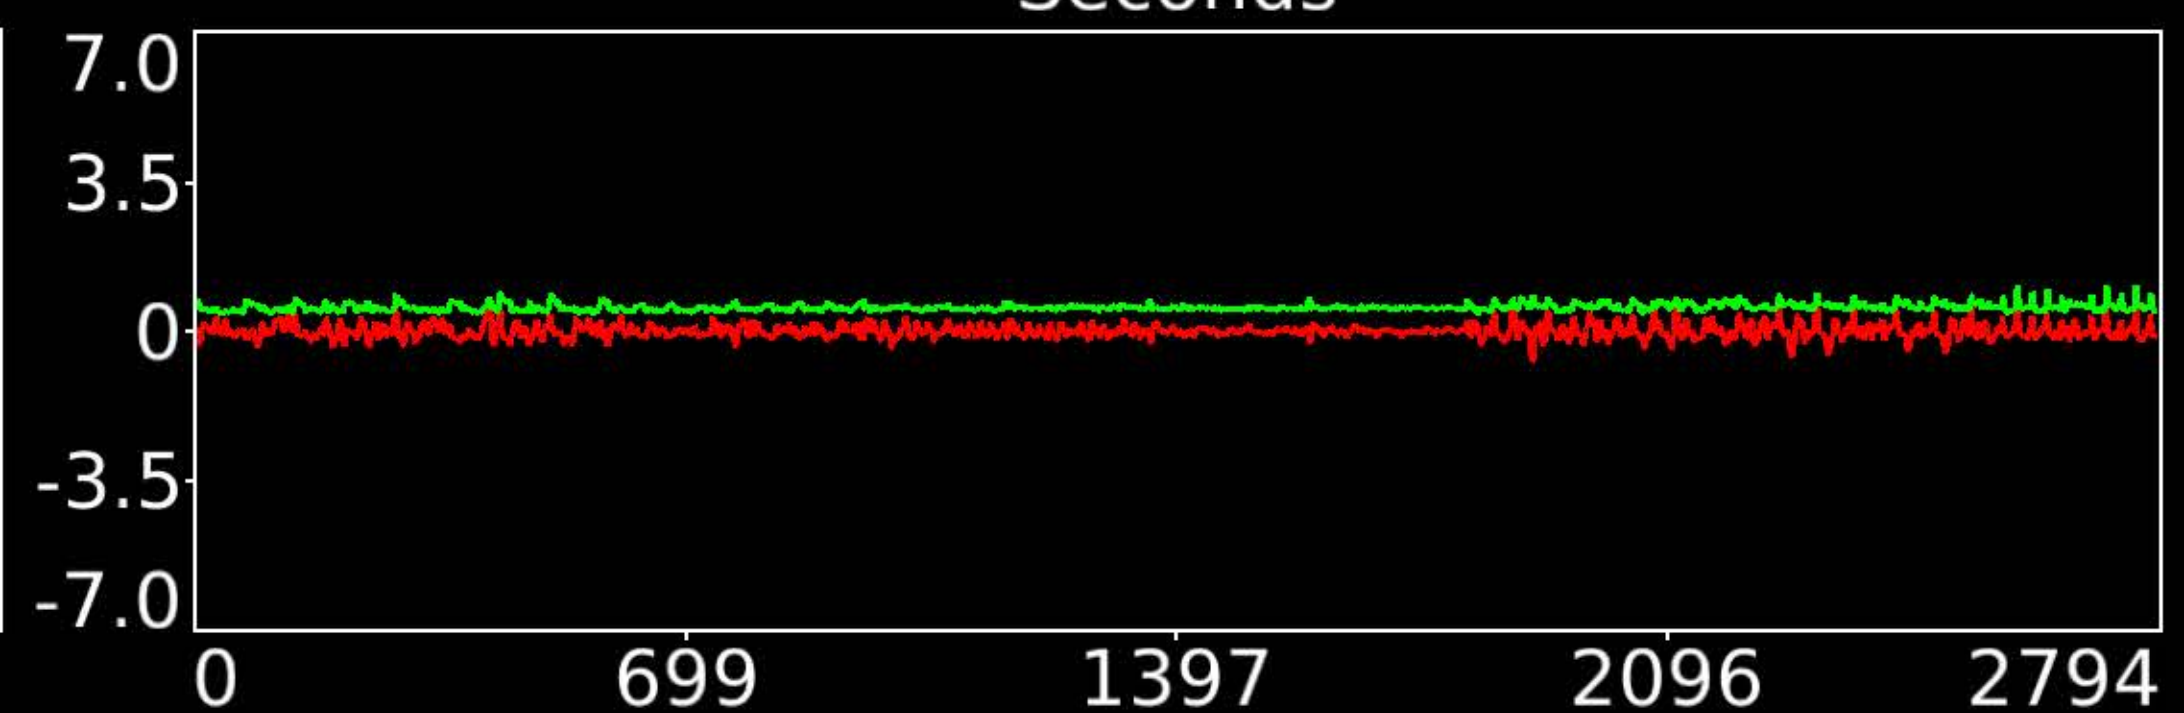

|                           |                            |                                           |  |
|---------------------------|----------------------------|-------------------------------------------|--|
| Number & Class: 65 Signal |                            | Name: Visuotopic: Foveal Dorsal > Ventral |  |
| RVT Correlated: No        | DVARS Dip Associated: No   | Cross-Subject Variable: No                |  |
| Single Subject: No        | % Variance Explained: 0.54 | Globality Index: 0.62                     |  |
| Rest Component: 76        | Taskr Component: 53        | Task Modulated: No                        |  |

Rationale: Spatial map includes positive and negative patches that respect known retinotopic visual organization (Foveal and Lower vs Upper)



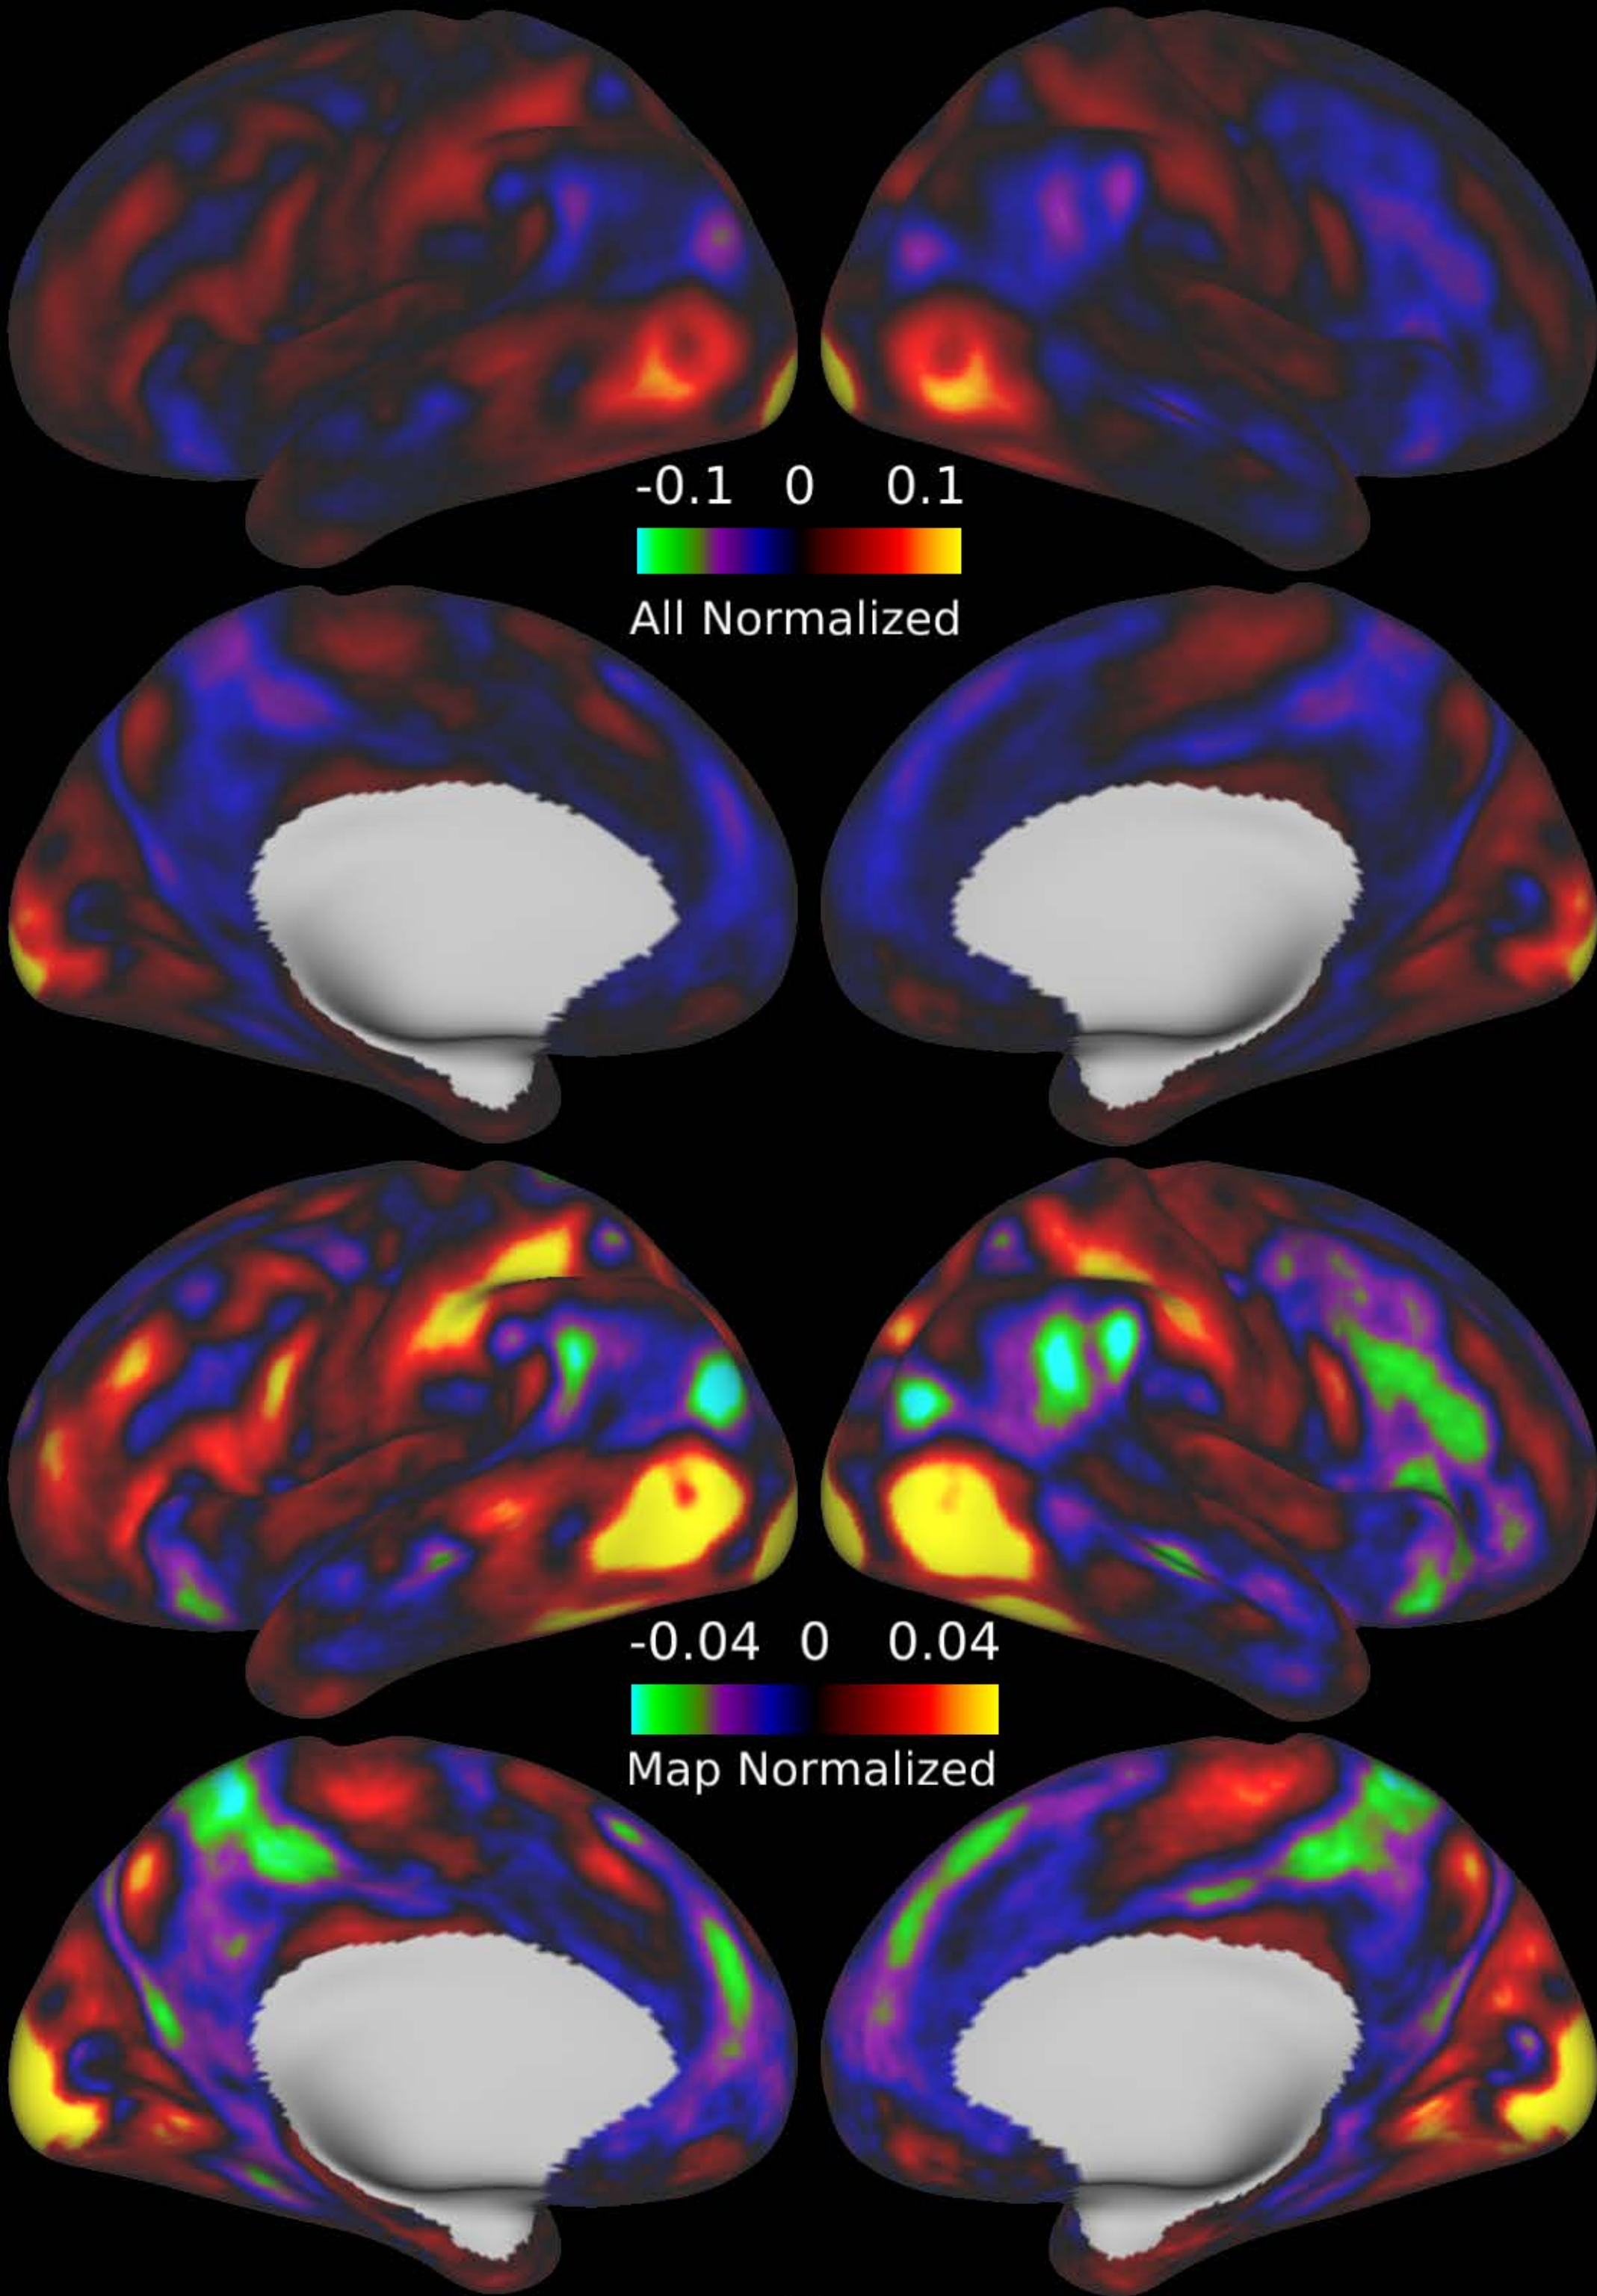

Hertz

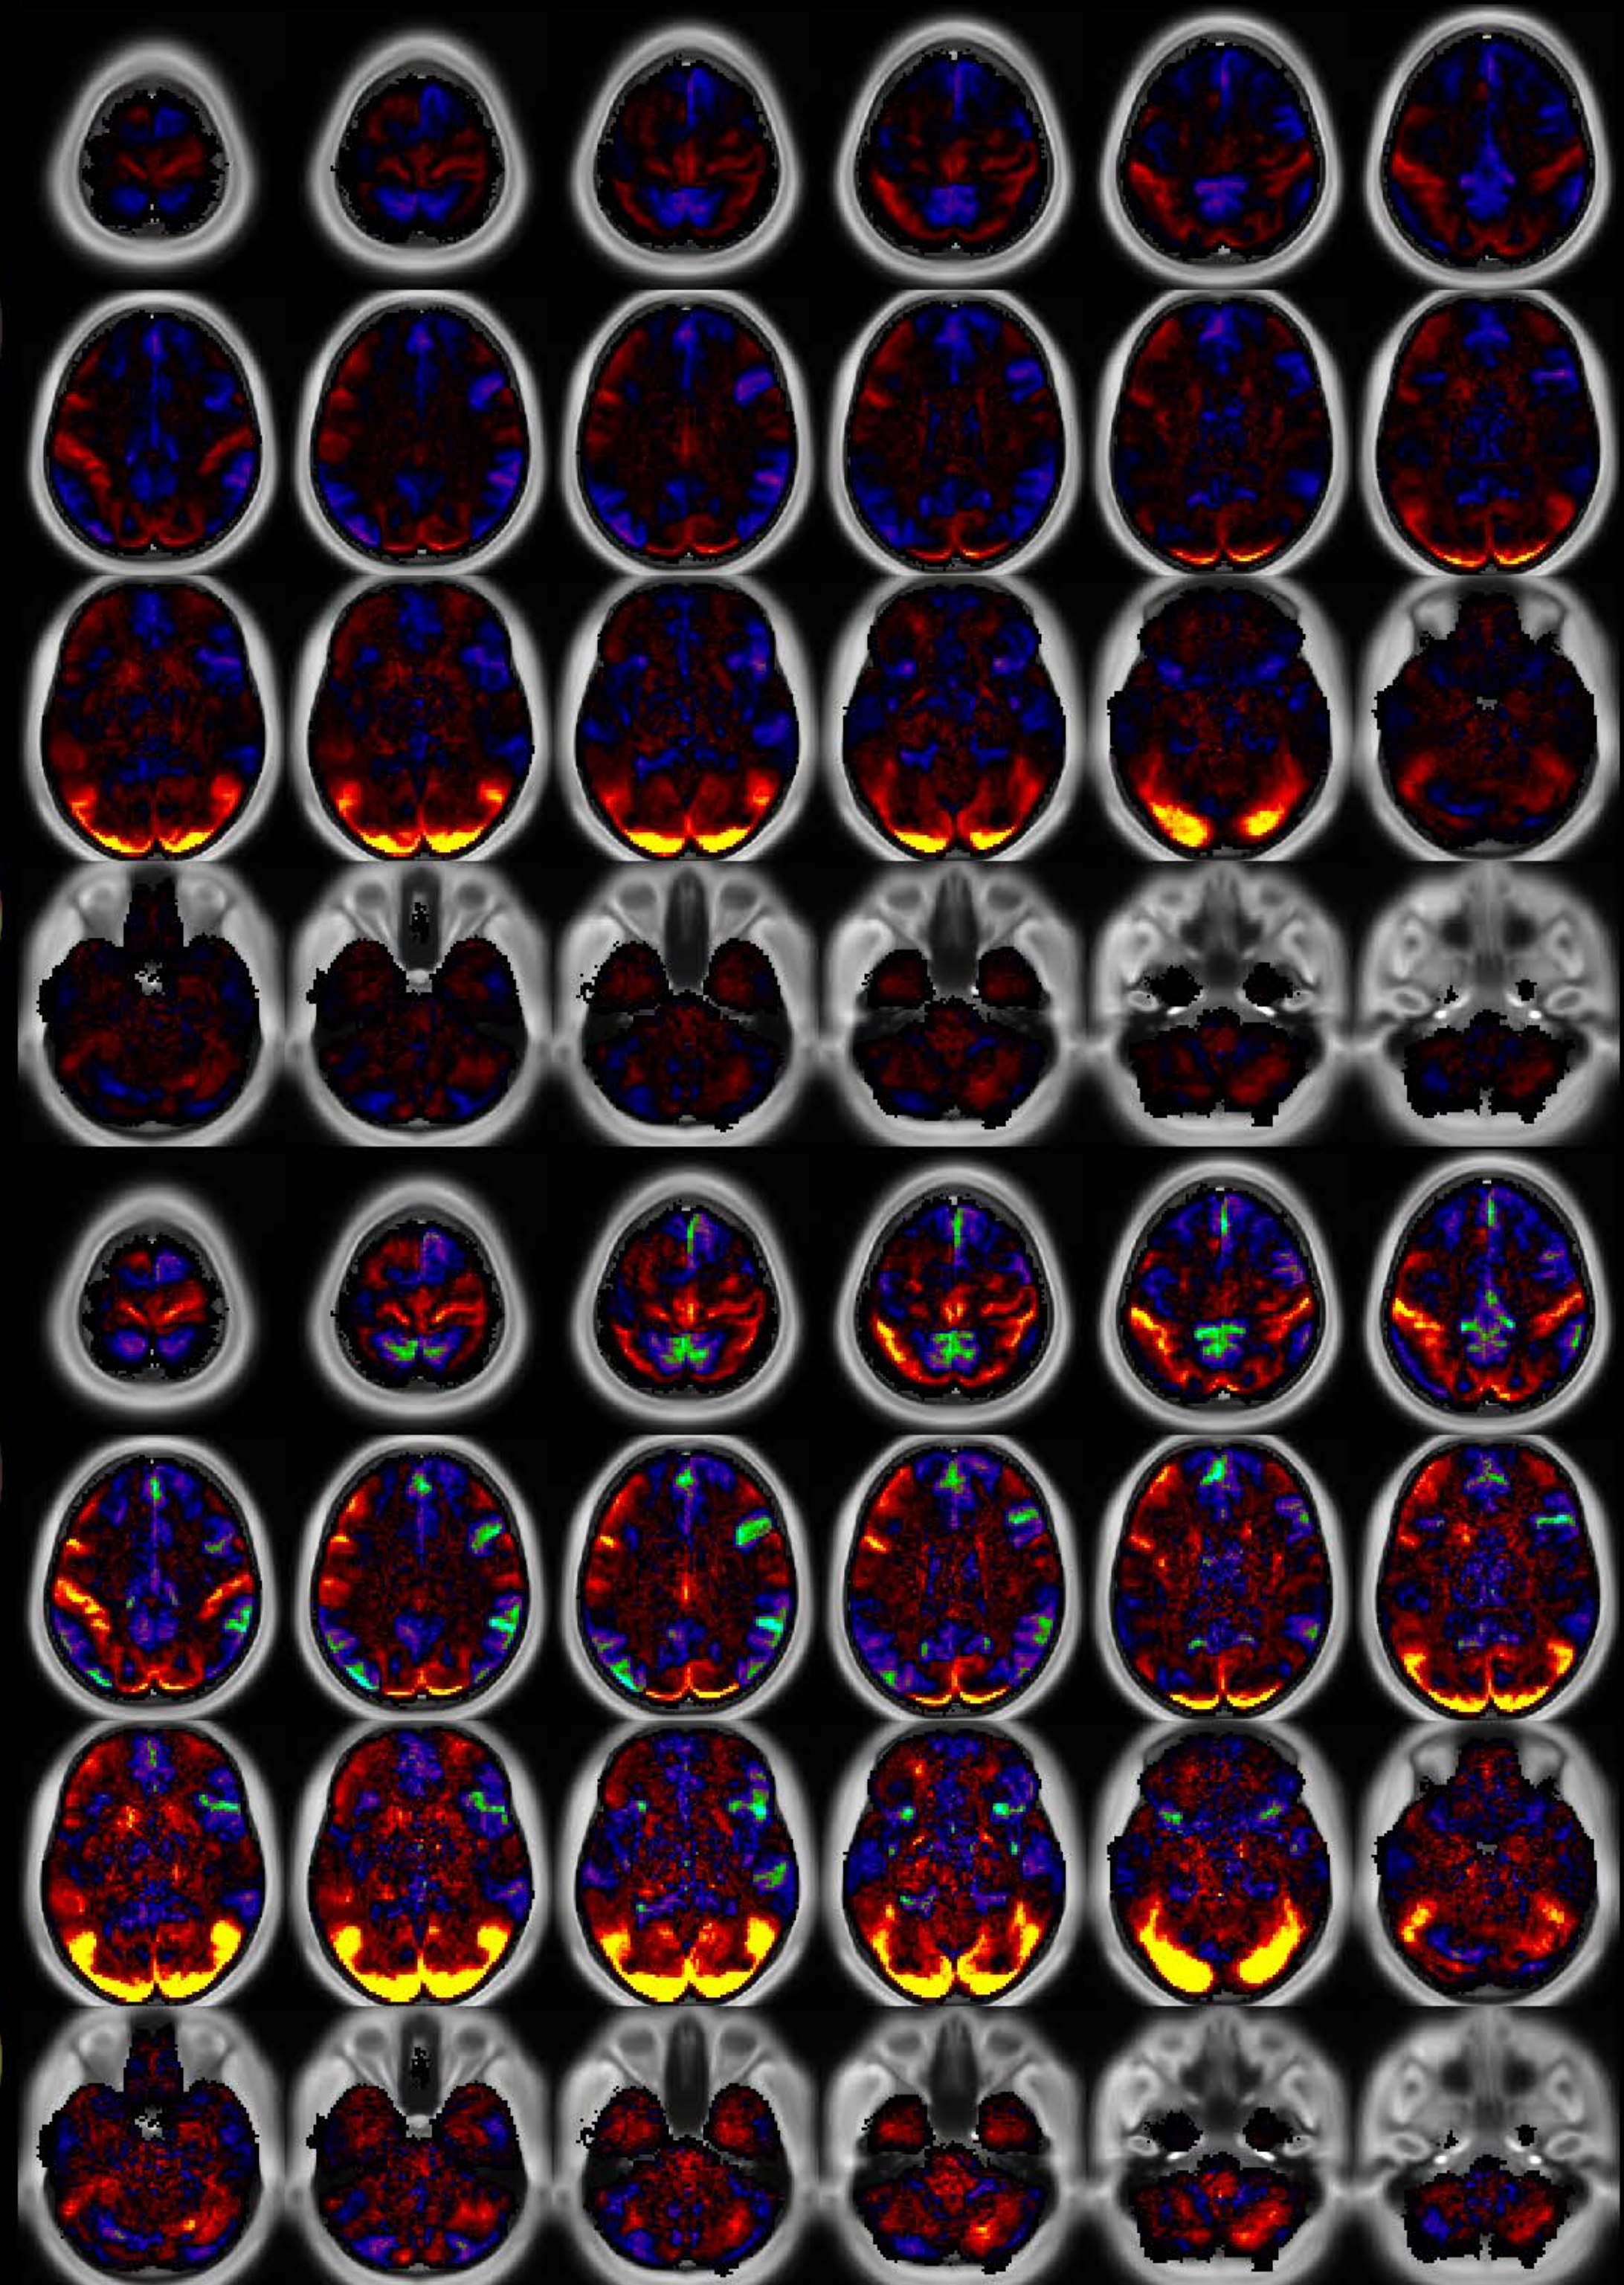

Seconds

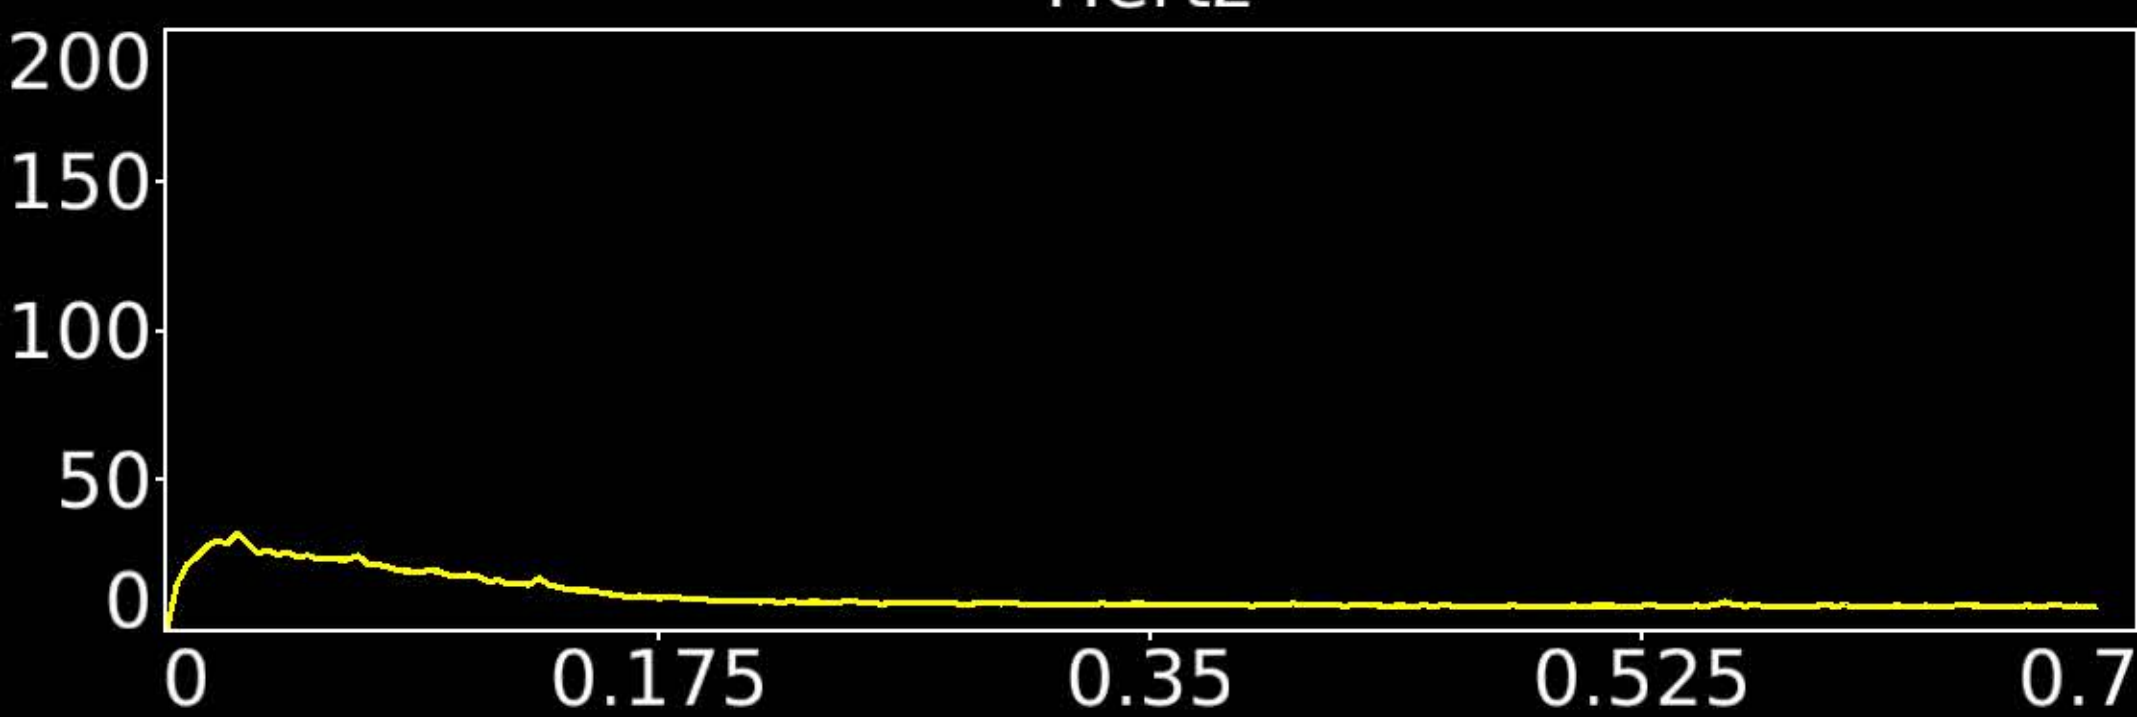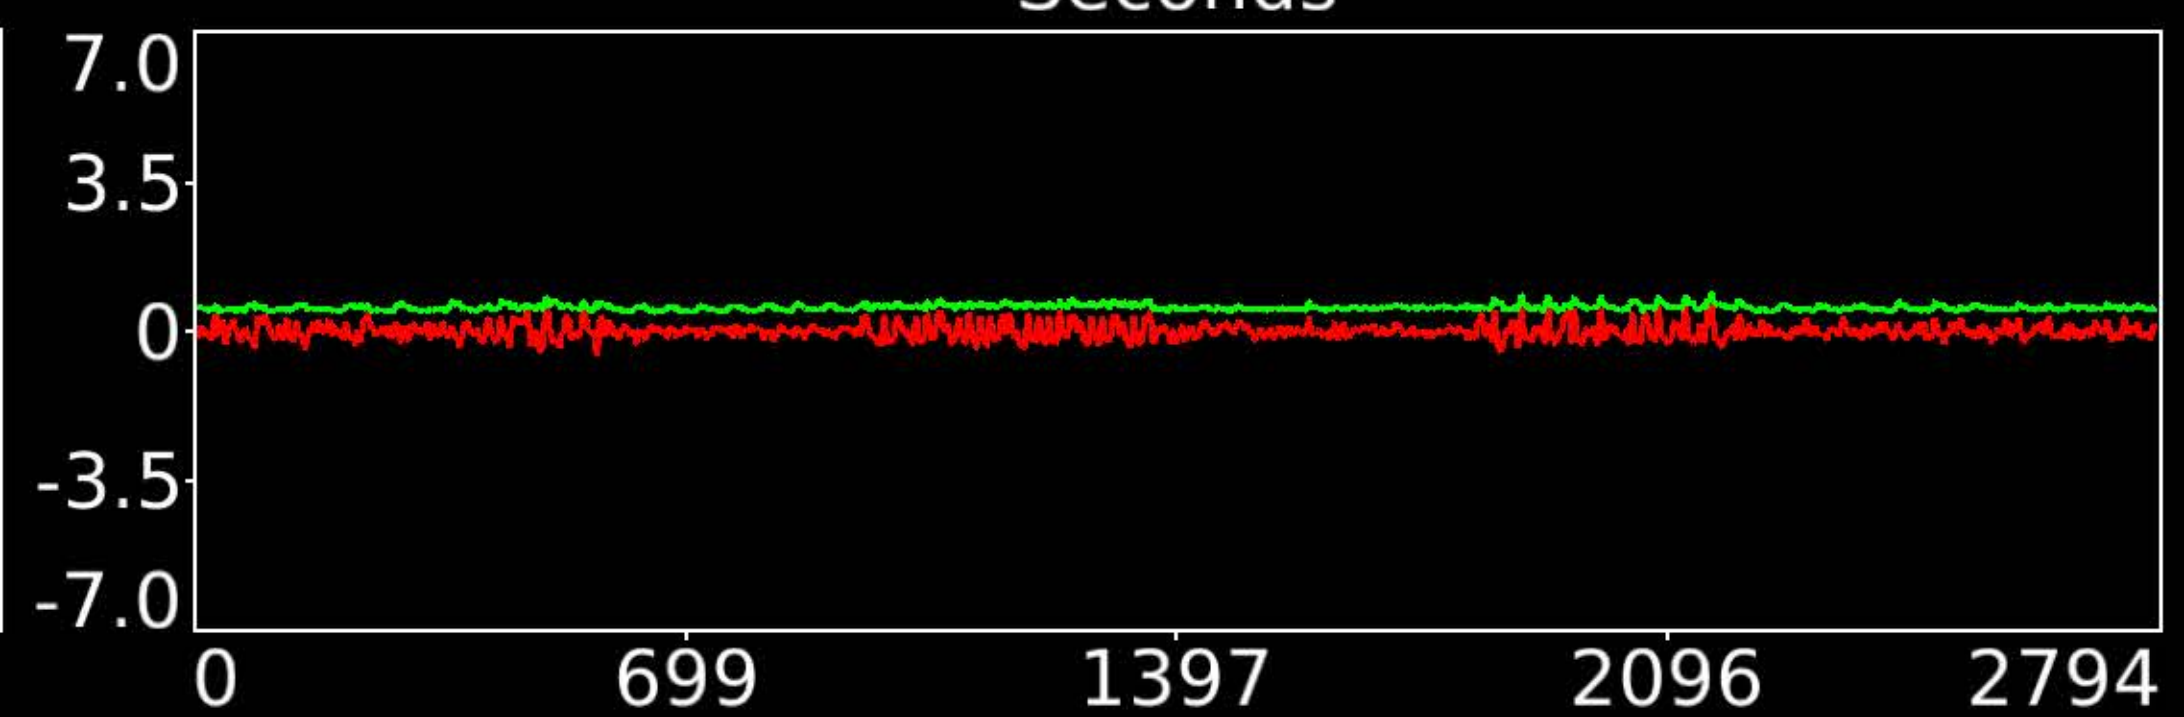

|                                                                                                   |                            |                                   |  |
|---------------------------------------------------------------------------------------------------|----------------------------|-----------------------------------|--|
| Number & Class: 66 Signal                                                                         |                            | Name: Extrastriate Visual Network |  |
| RVT Correlated: No                                                                                | DVARS Dip Associated: No   | Cross-Subject Variable: No        |  |
| Single Subject: No                                                                                | % Variance Explained: 0.52 | Globality Index: 0.46             |  |
| Rest Component: No                                                                                | Taskr Component: No        | Task Modulated: No                |  |
| Rationale: Spatial map has elements of visuotopy and known RSNs though in an atypical arrangement |                            |                                   |  |



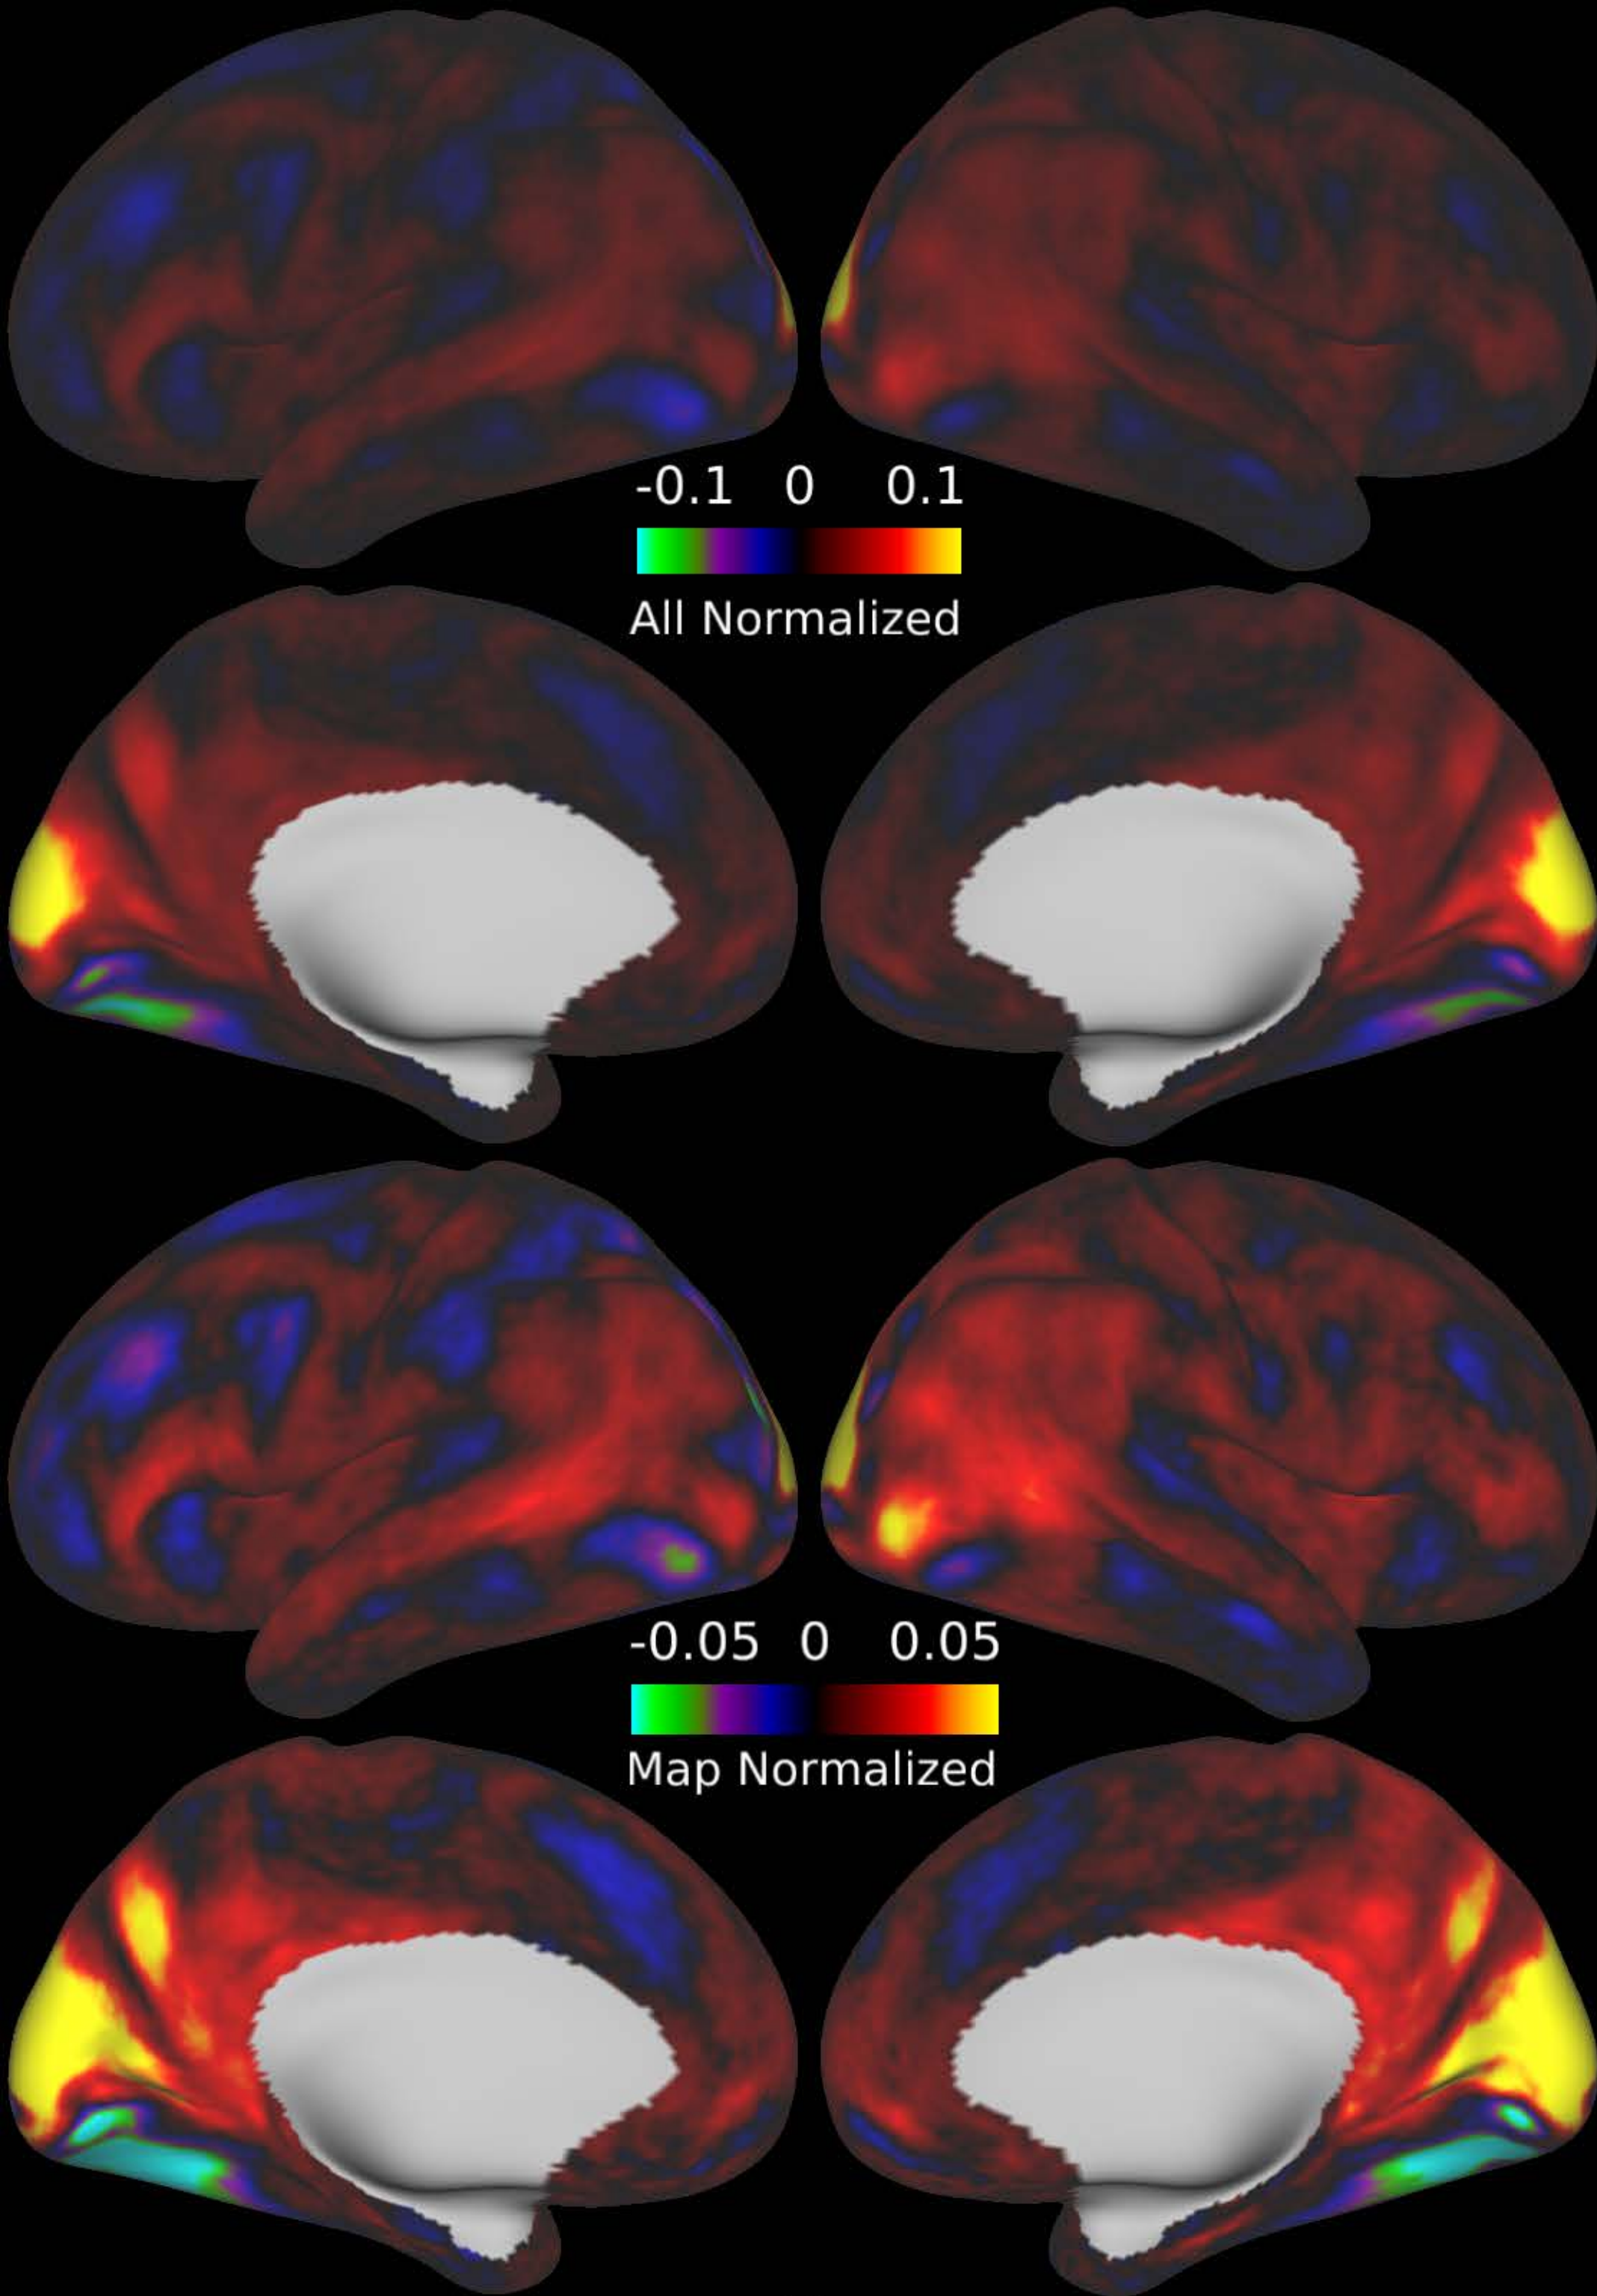

Hertz

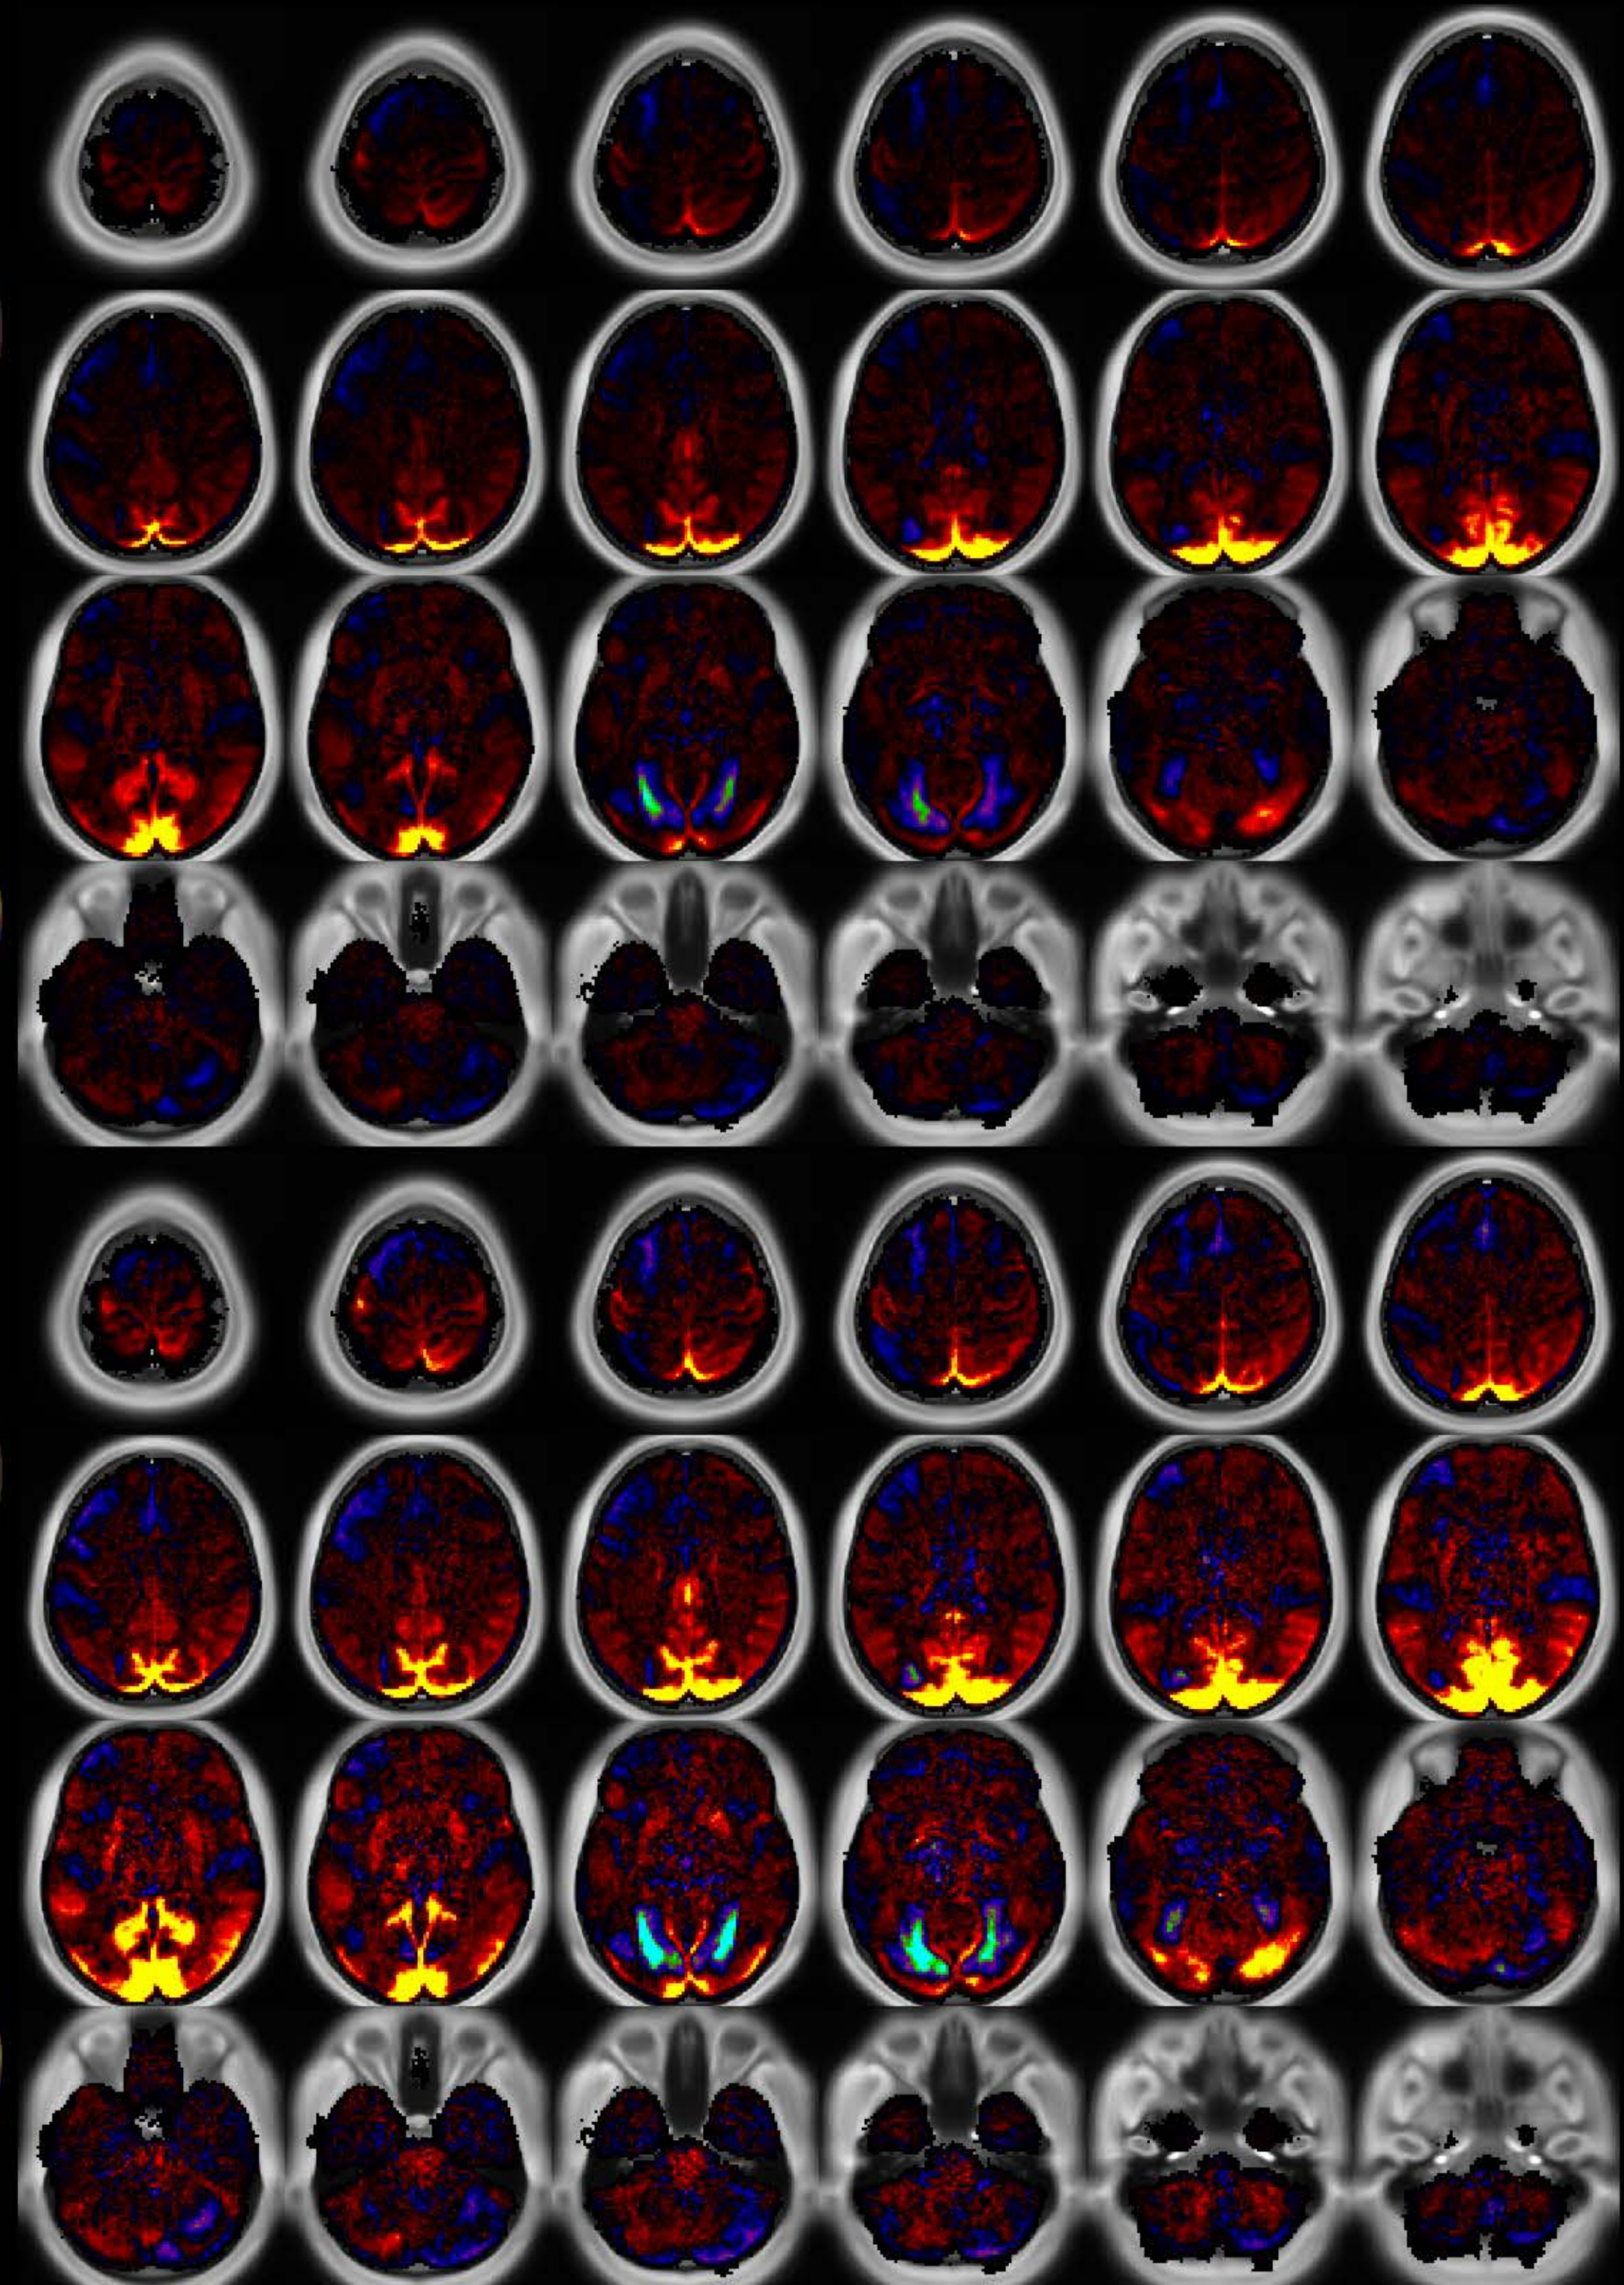

Seconds

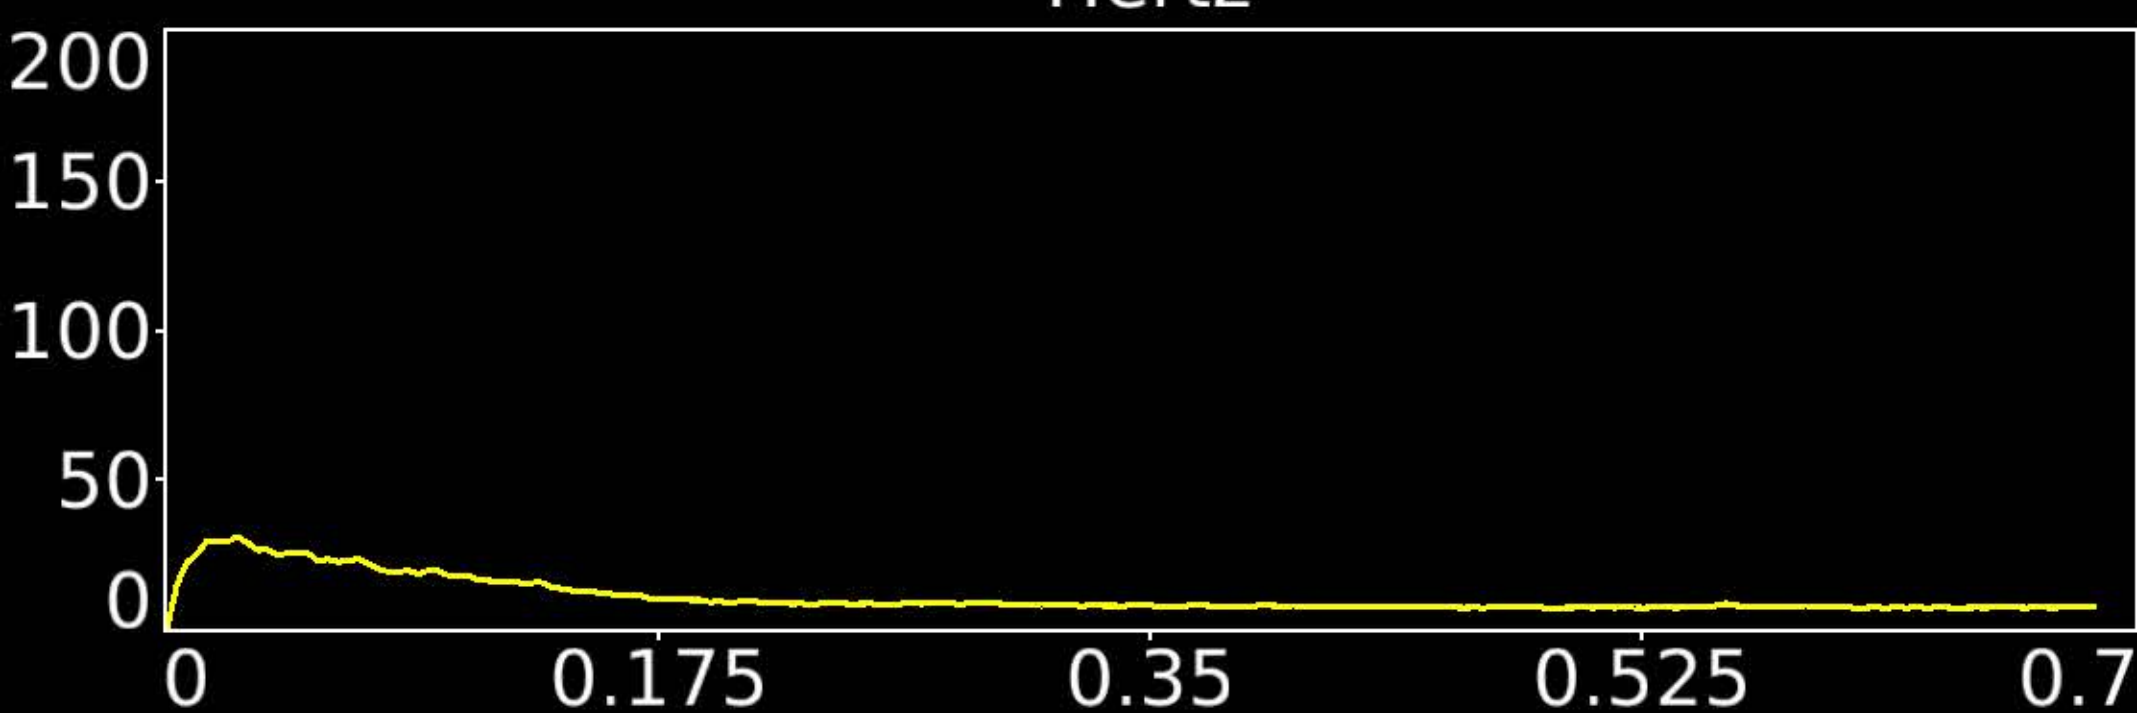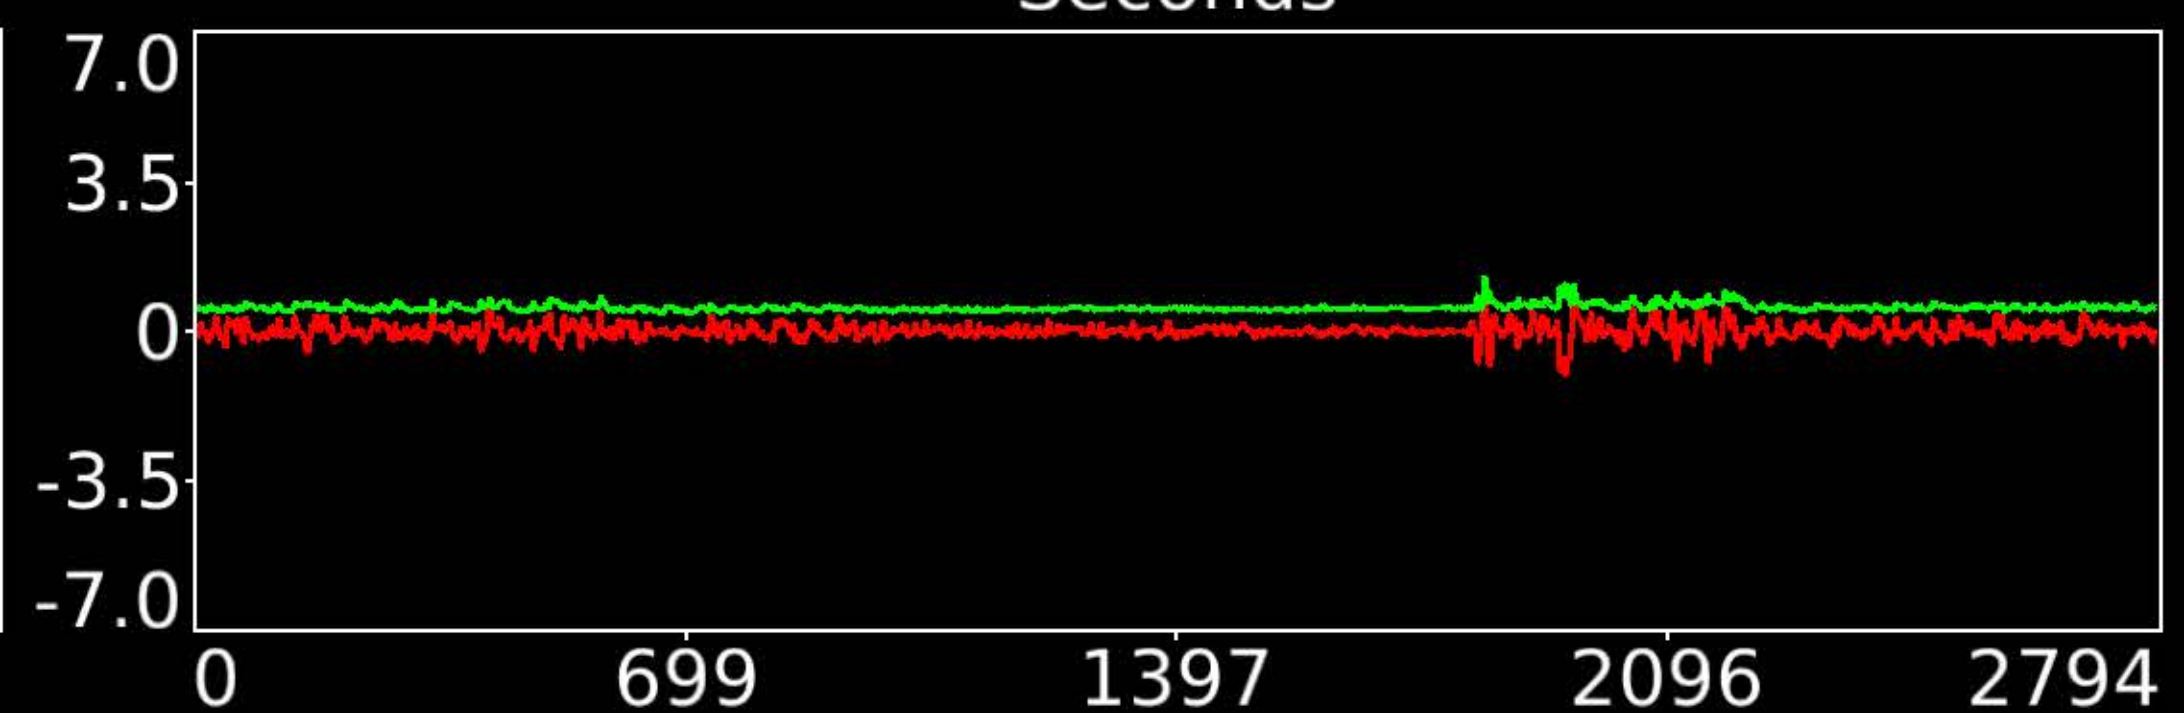

|                           |                            |                                                |  |
|---------------------------|----------------------------|------------------------------------------------|--|
| Number & Class: 67 Signal |                            | Name: Visuotopic: Paracentral Dorsal > Ventral |  |
| RVT Correlated: No        | DVARS Dip Associated: No   | Cross-Subject Variable: No                     |  |
| Single Subject: No        | % Variance Explained: 0.52 | Globality Index: 1.42                          |  |
| Rest Component: -82       | Taskr Component: 49        | Task Modulated: No                             |  |

Rationale: Spatial map includes positive and negative patches that respect known retinotopic visual organization (Lower vs Upper)



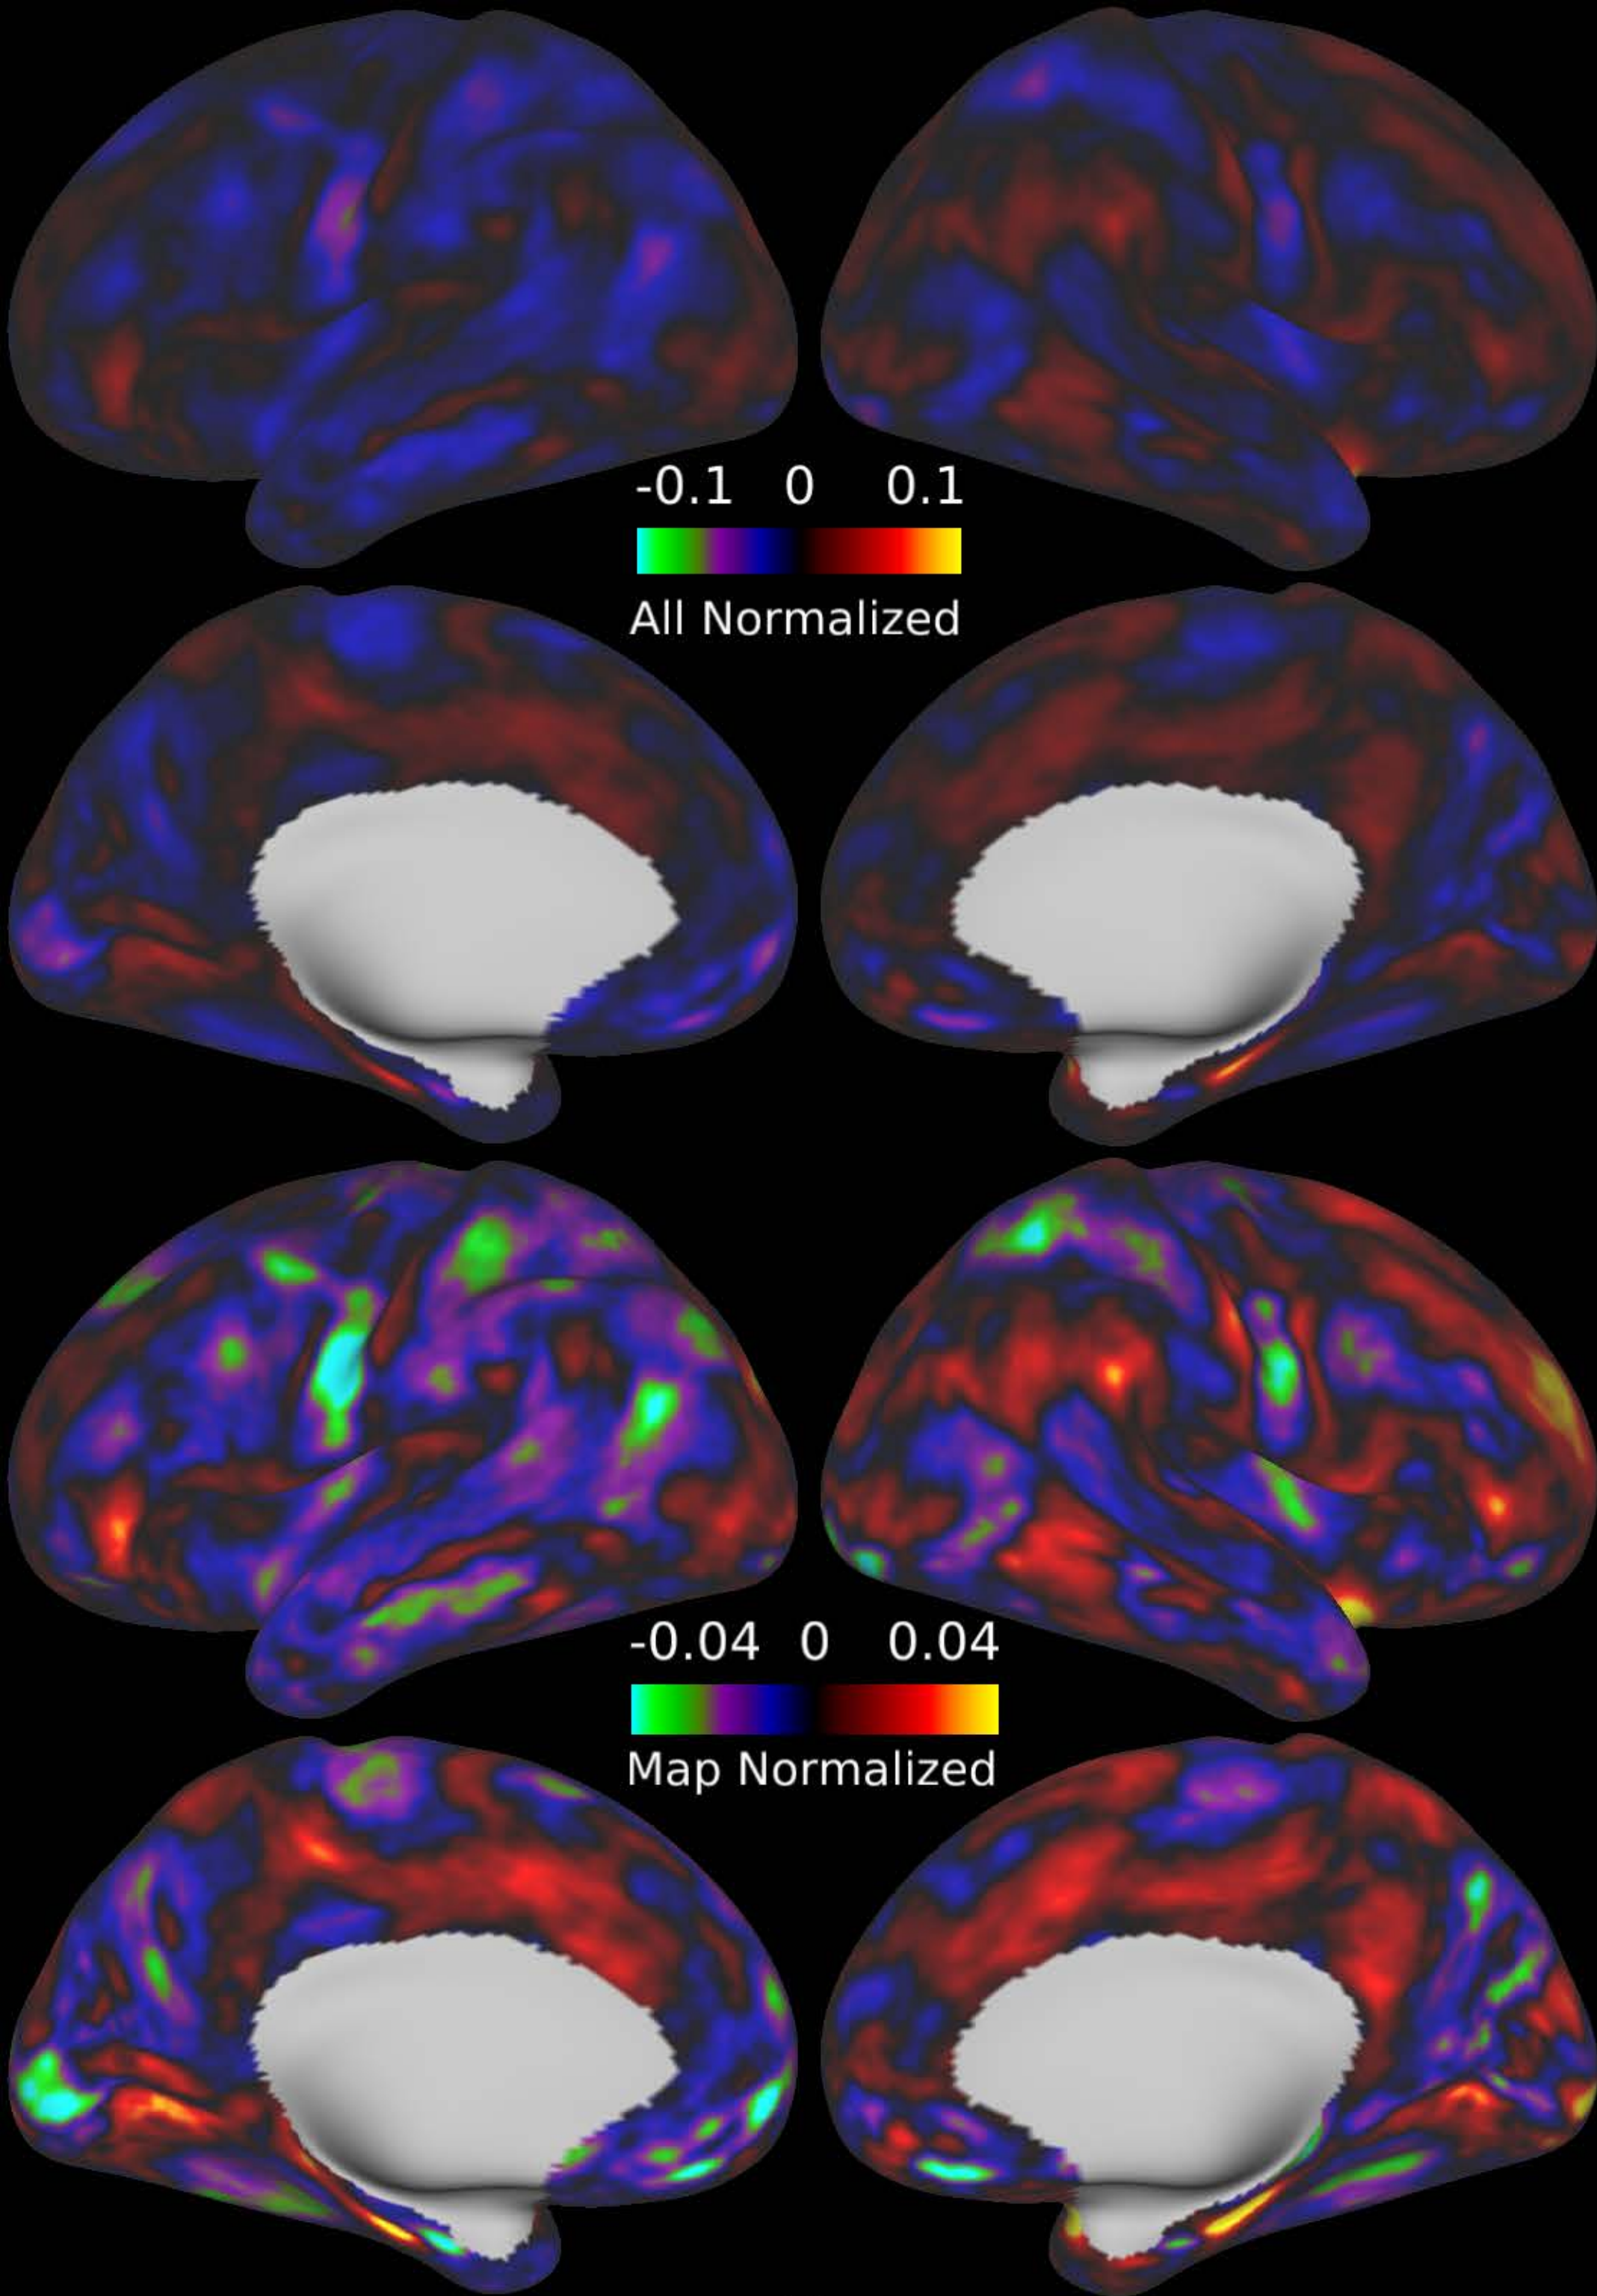

Hertz

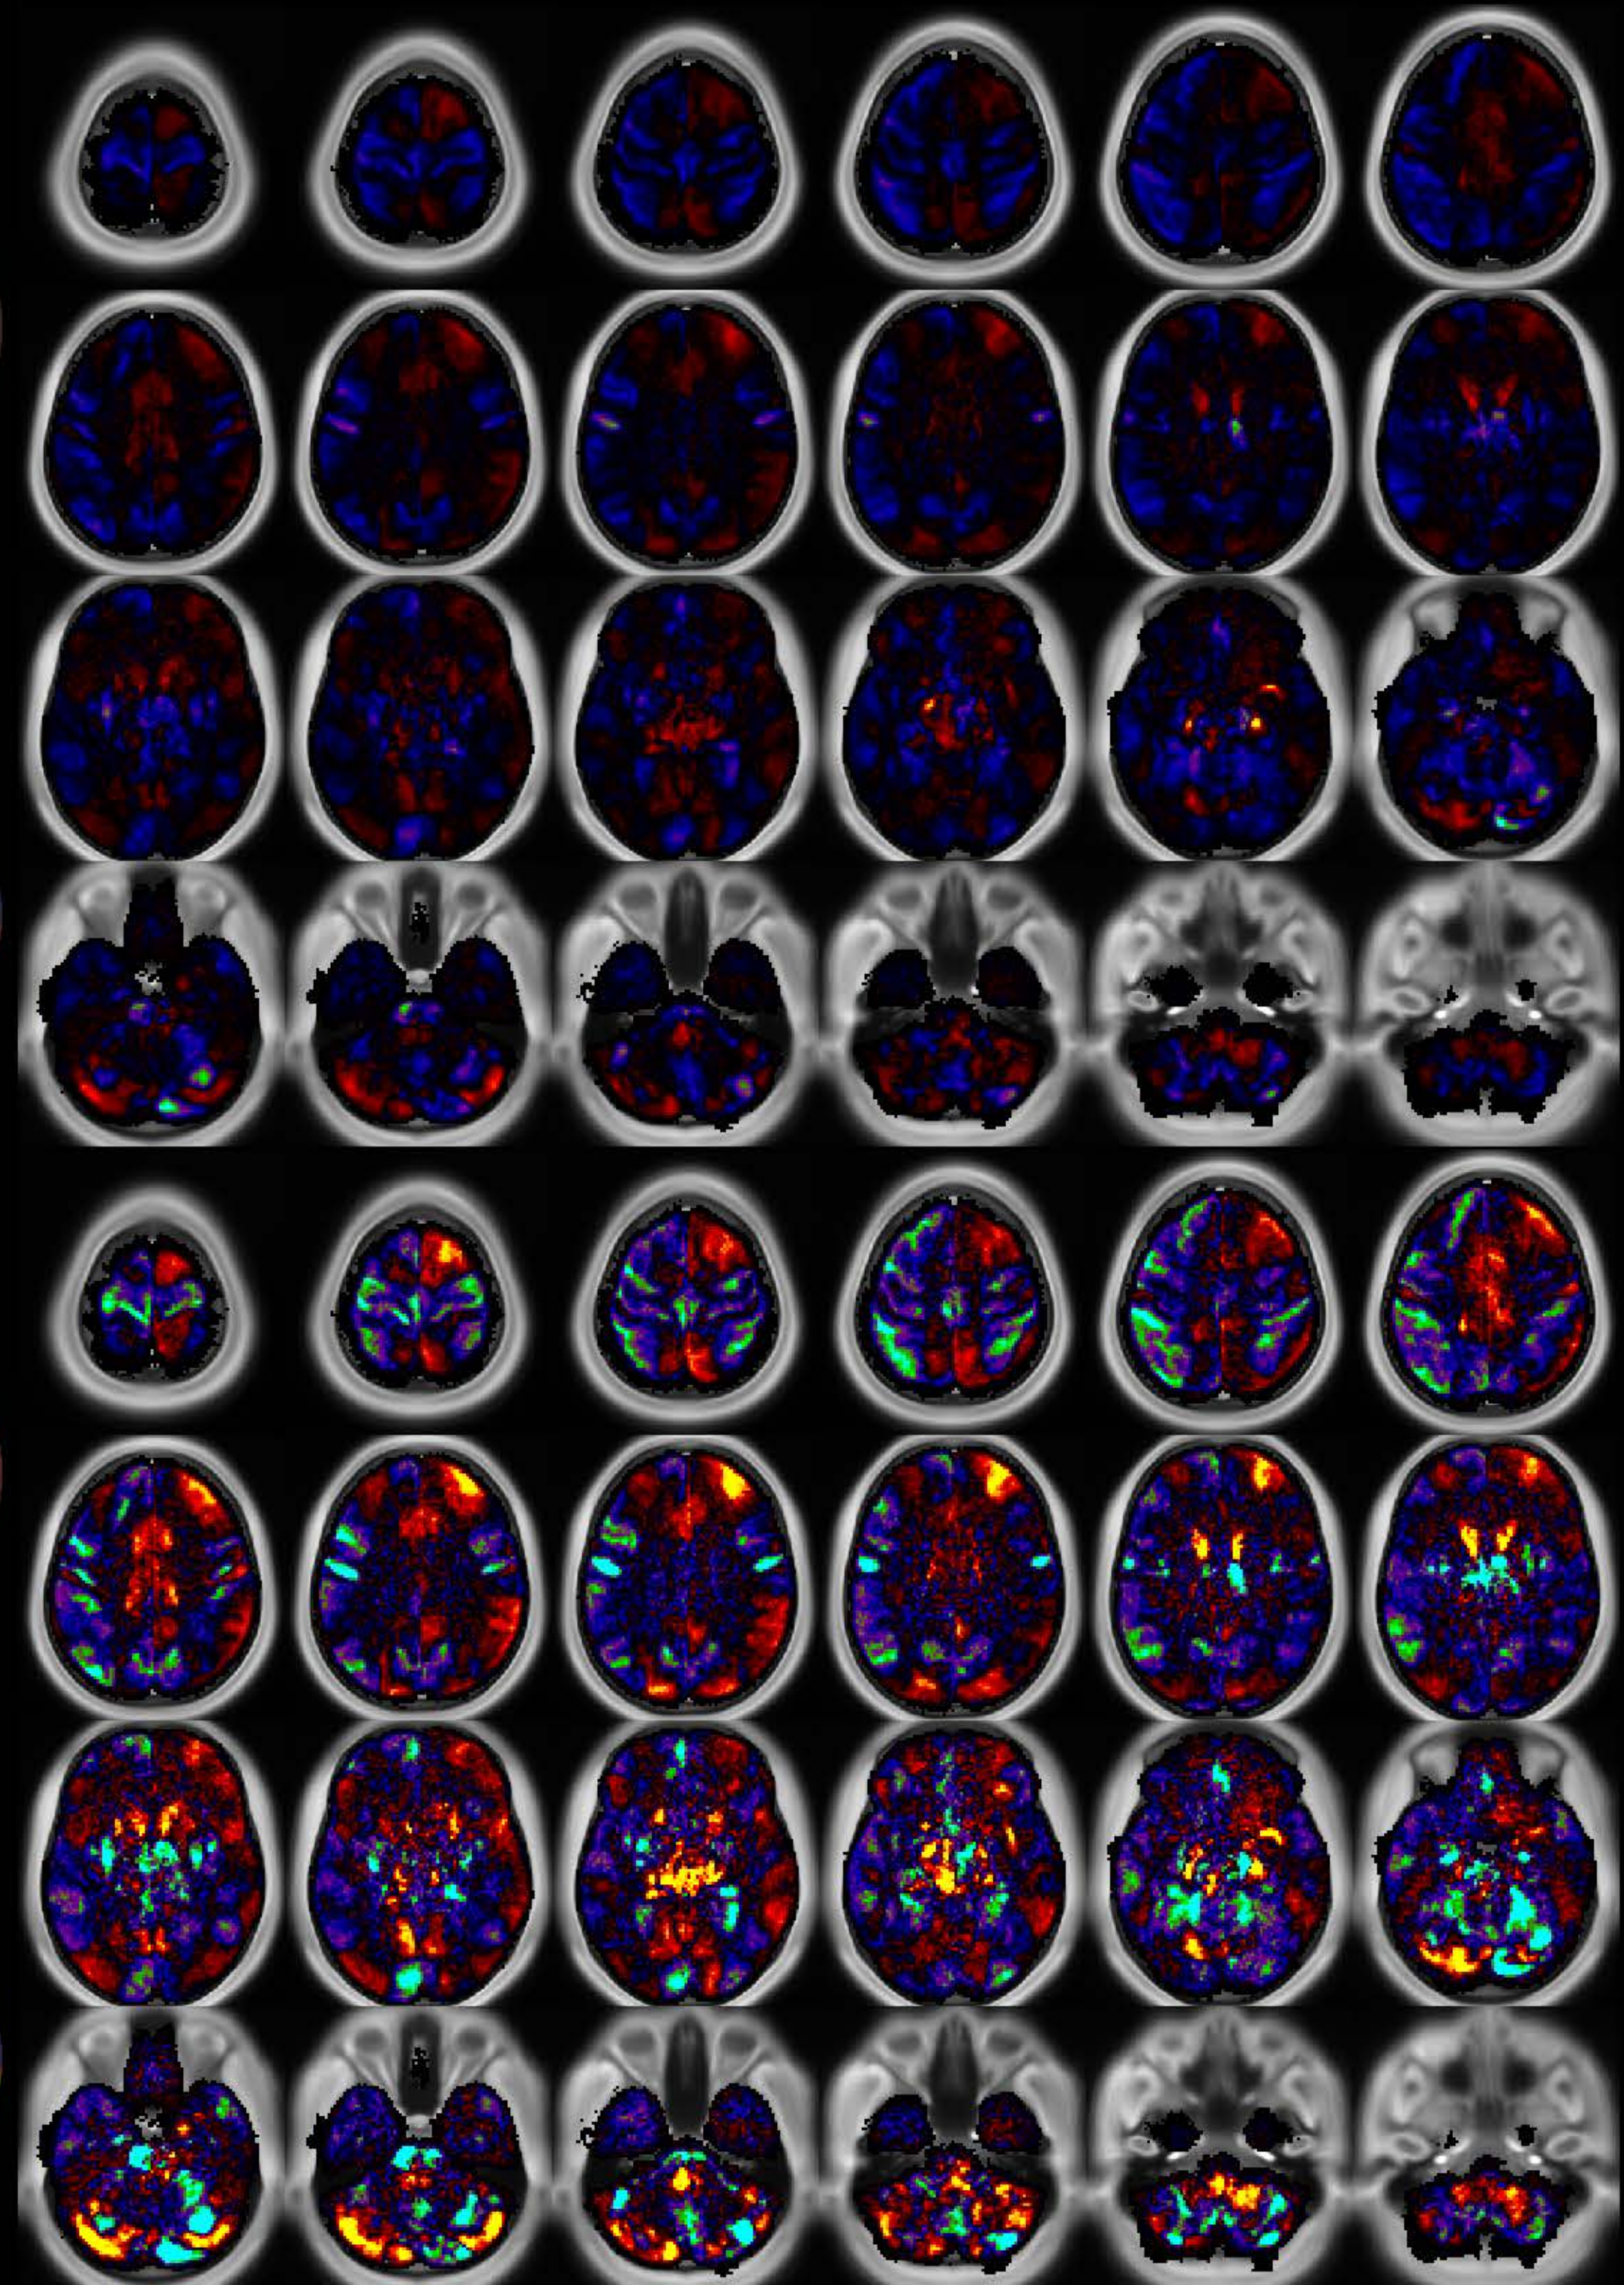

Seconds

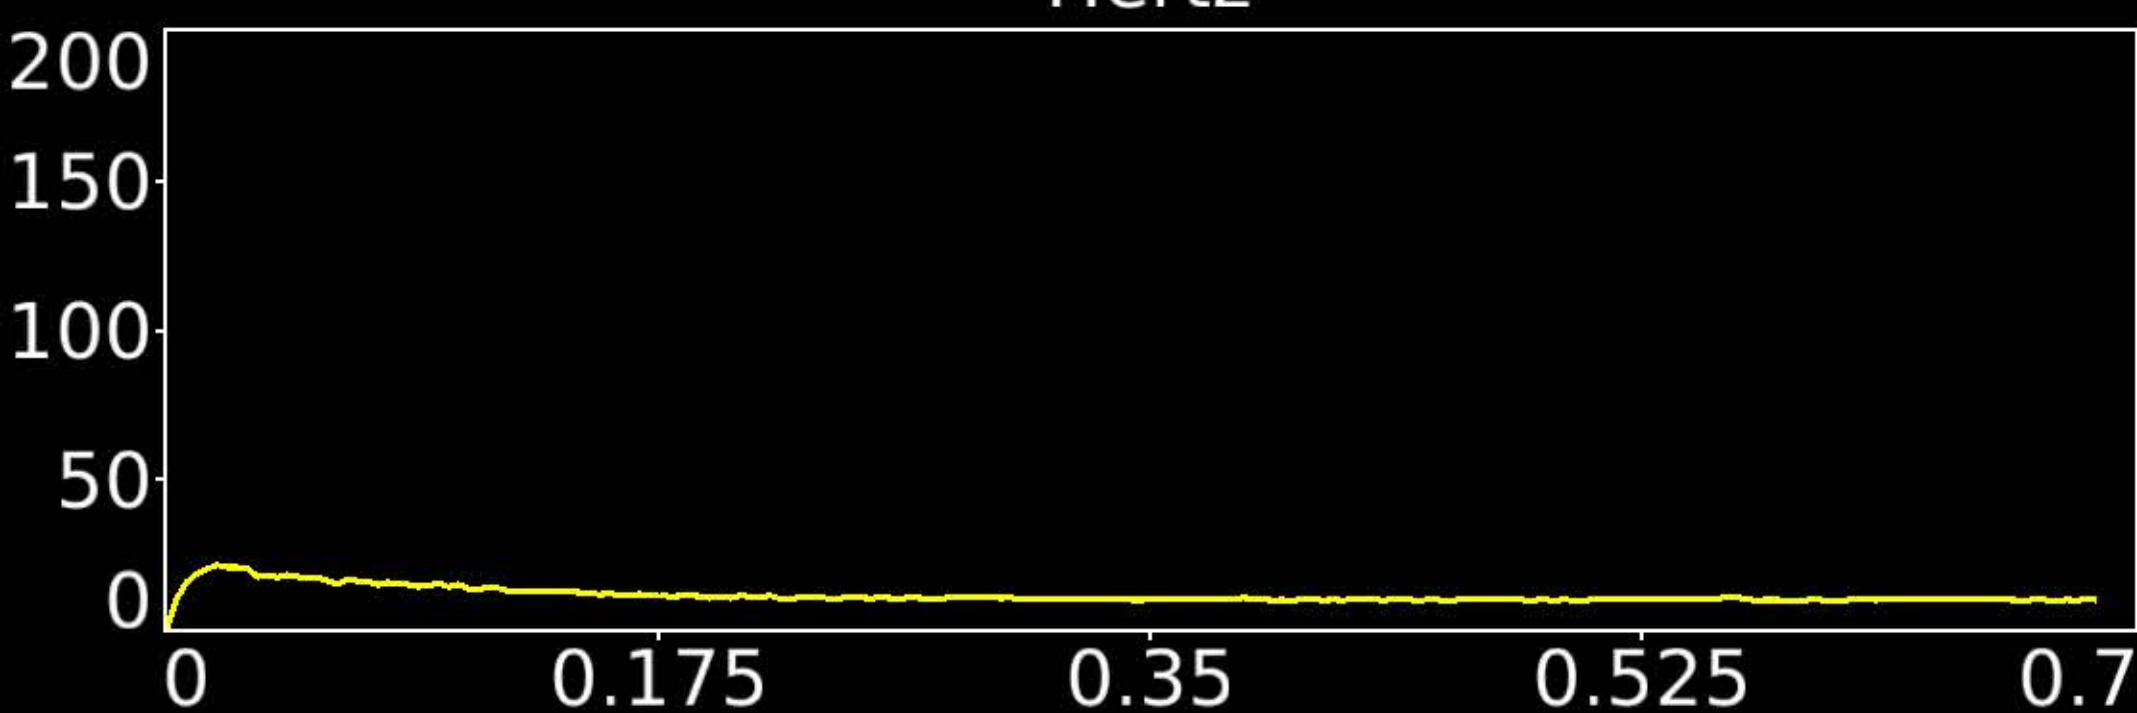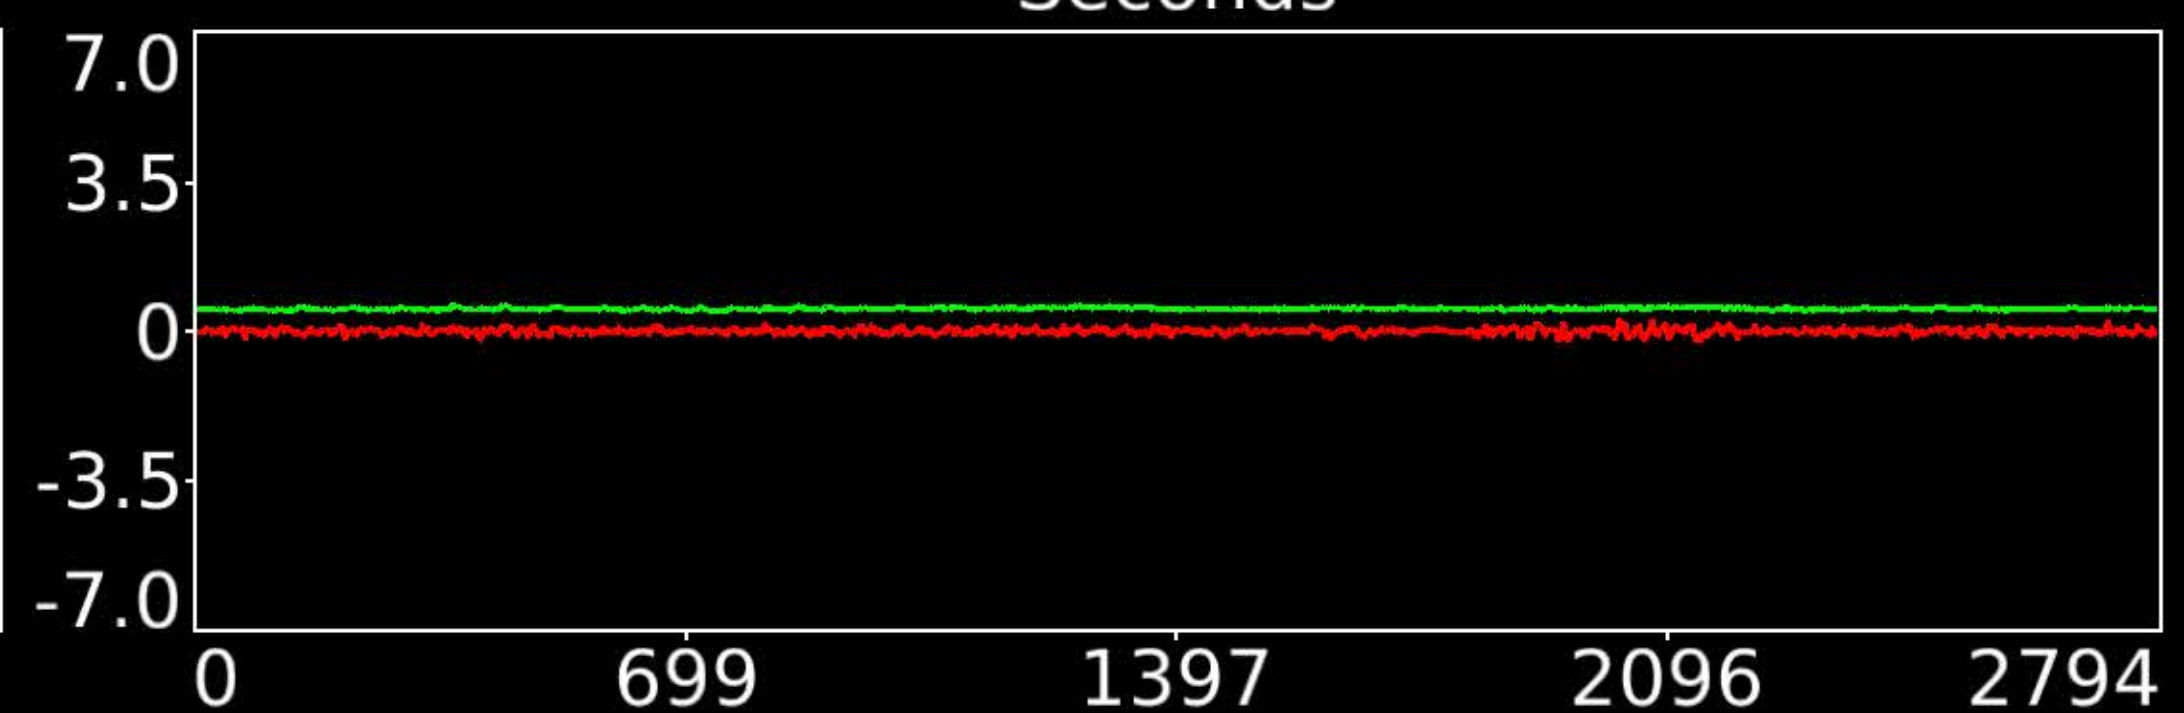

|                                                                                |                            |                                                 |  |
|--------------------------------------------------------------------------------|----------------------------|-------------------------------------------------|--|
| Number & Class: 68 Noise                                                       |                            | Name: Single Subject Global Physiological Noise |  |
| RVT Correlated: No                                                             | DVARS Dip Associated: No   | Cross-Subject Variable: No                      |  |
| Single Subject: Yes                                                            | % Variance Explained: 0.46 | Globality Index: 0.41                           |  |
| Rest Component: No                                                             | Taskr Component: No        | Task Modulated: No                              |  |
| Rationale: Single subject component with high correlation to global timecourse |                            |                                                 |  |



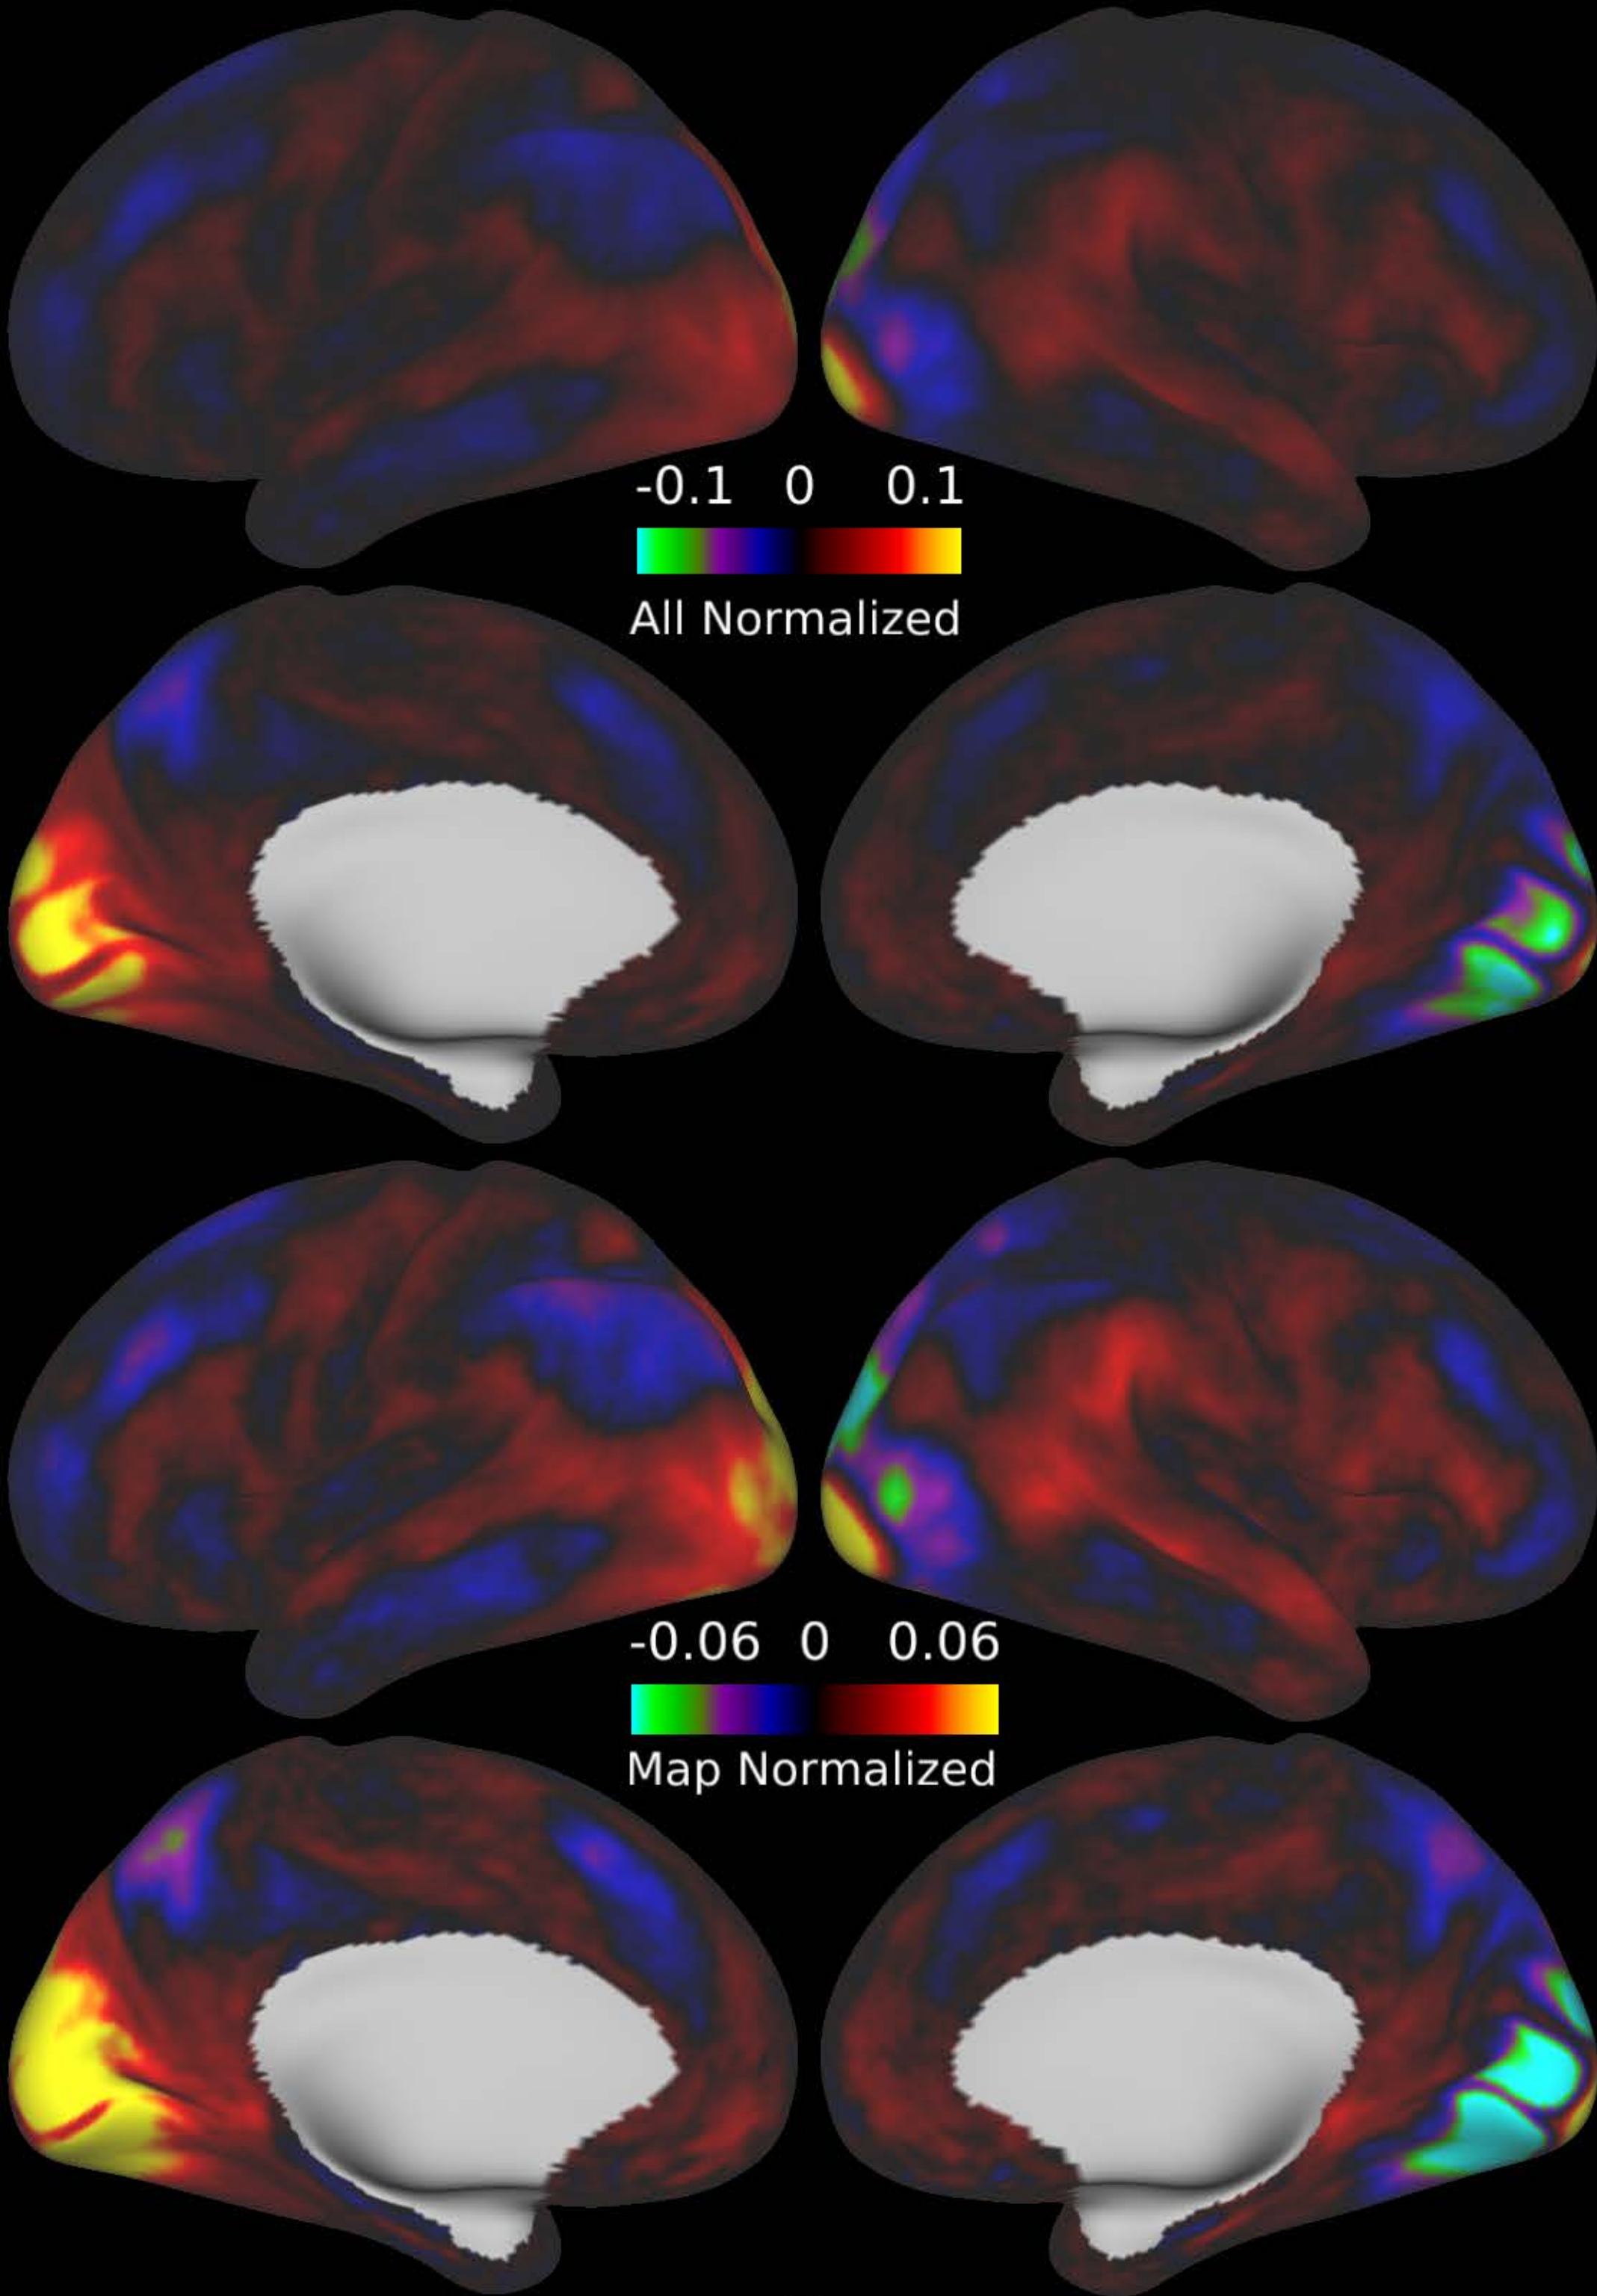

Hertz

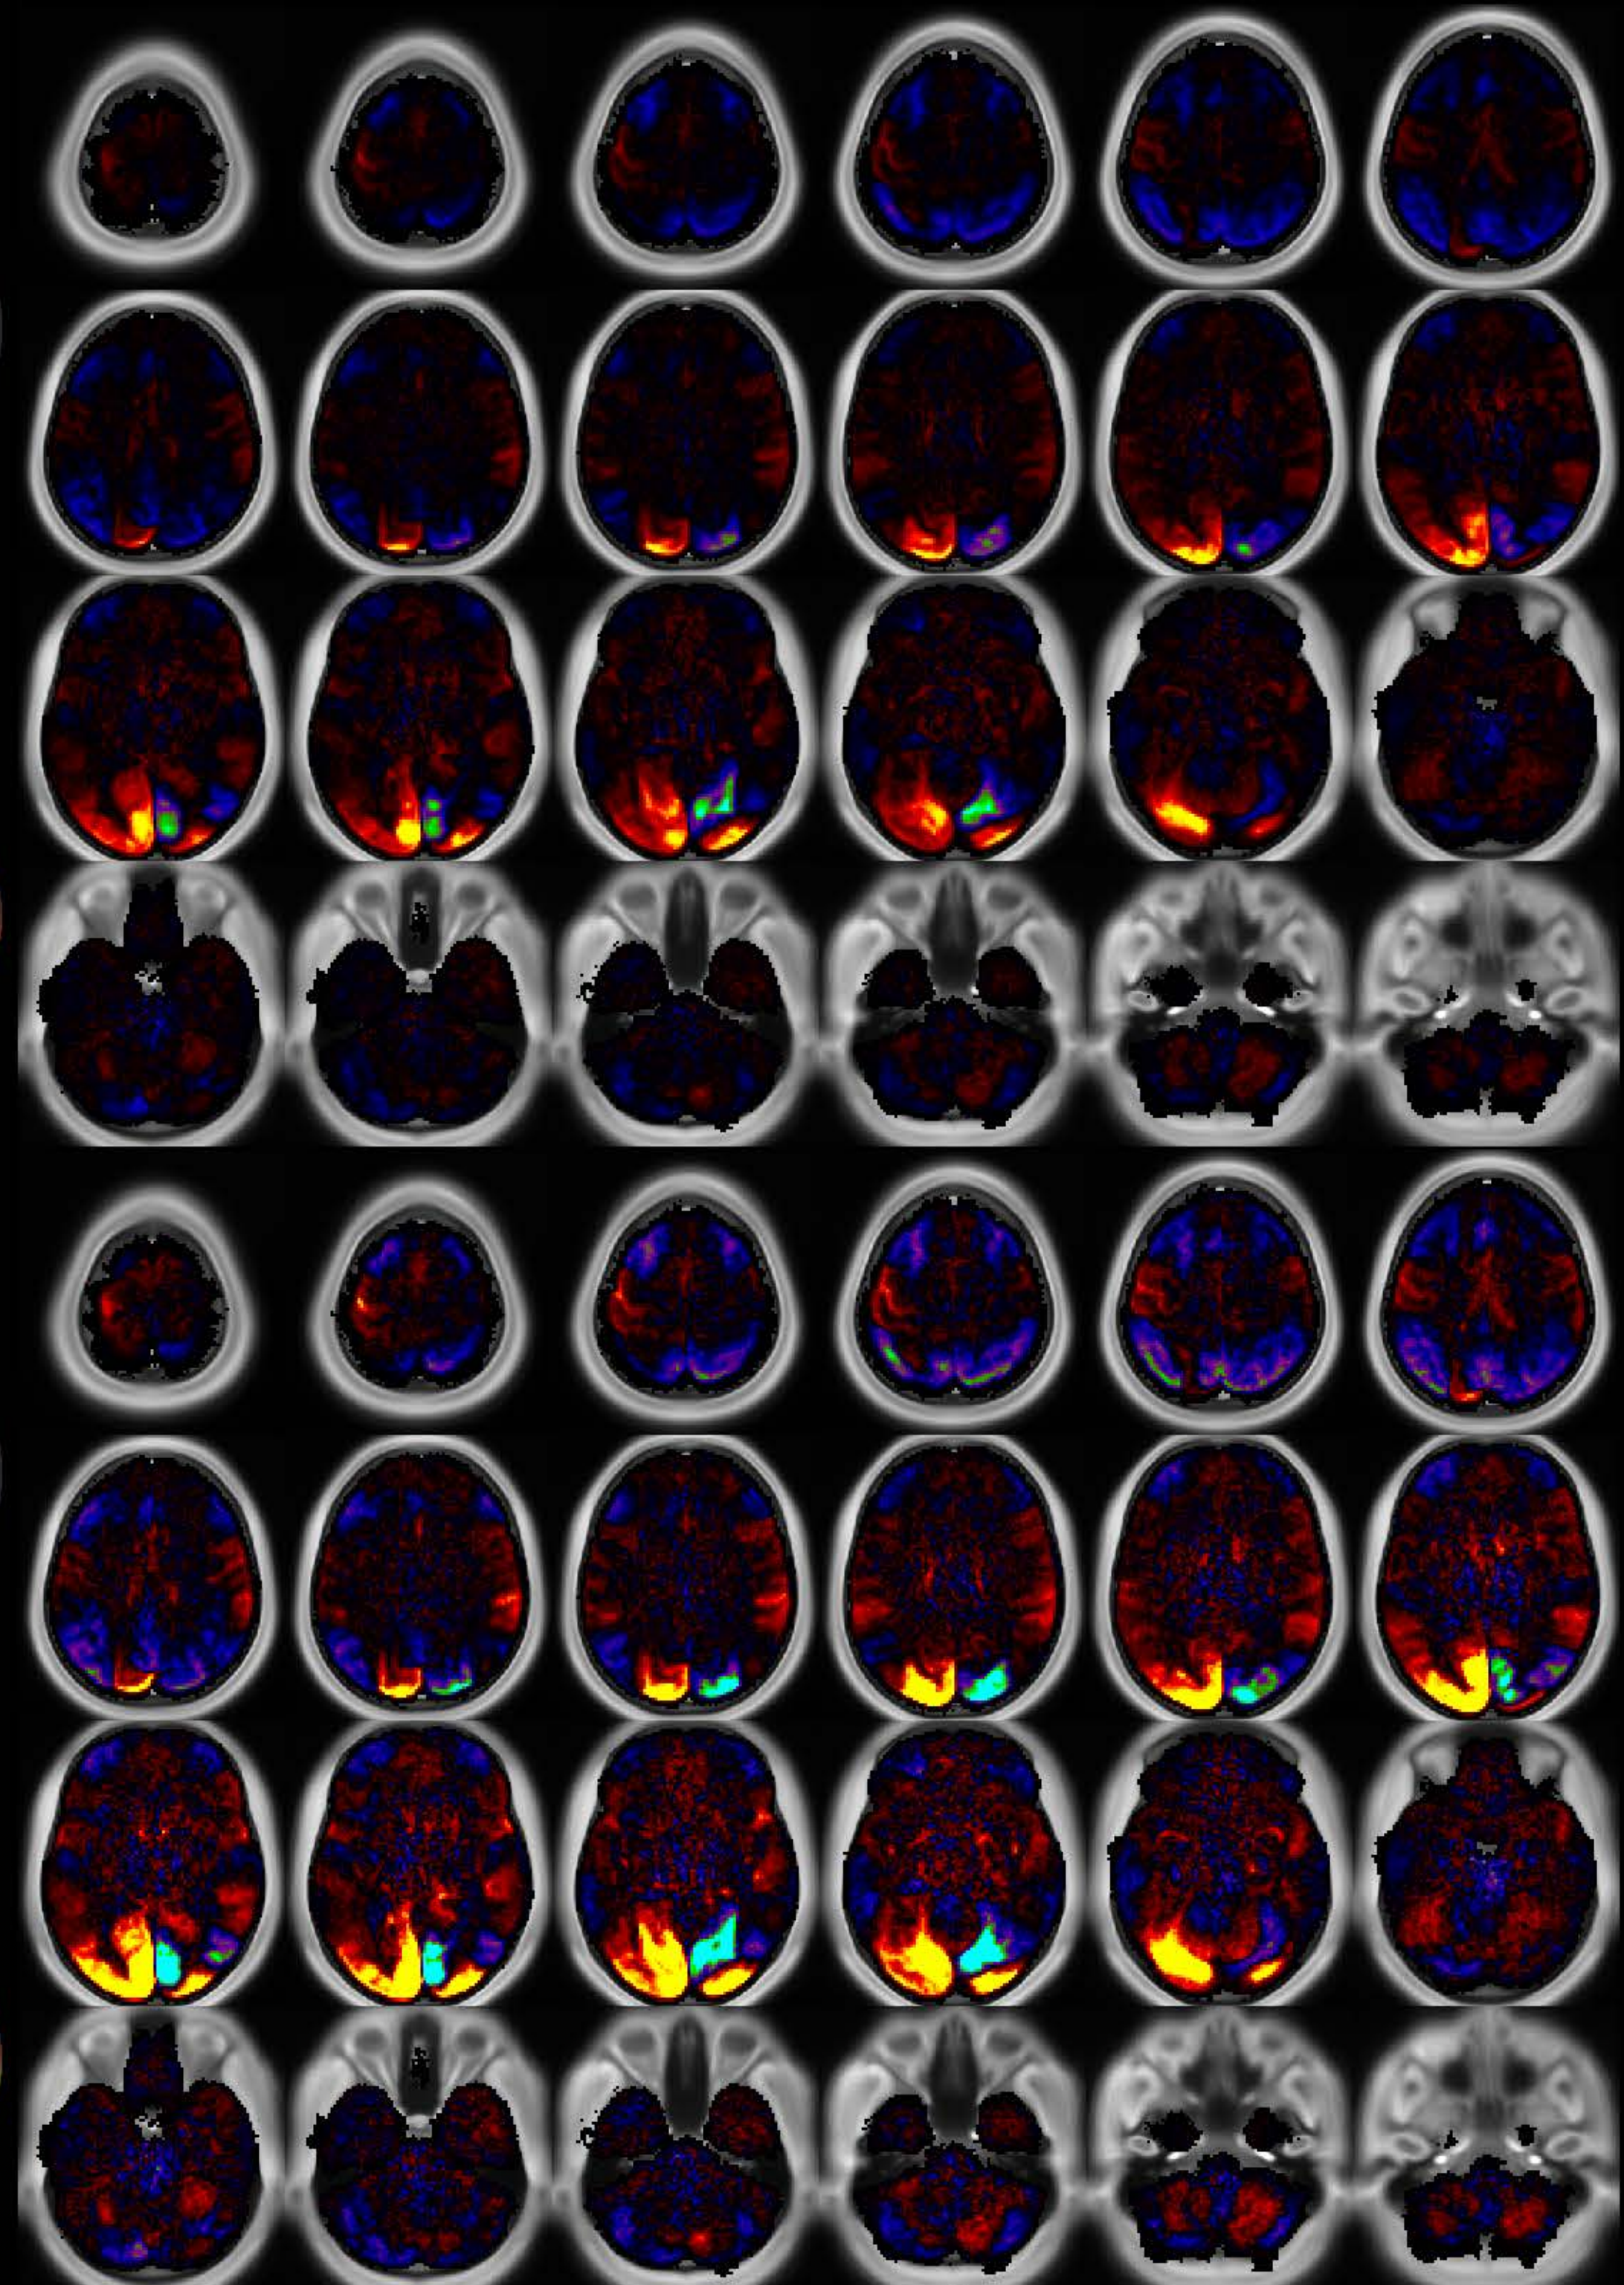

Seconds

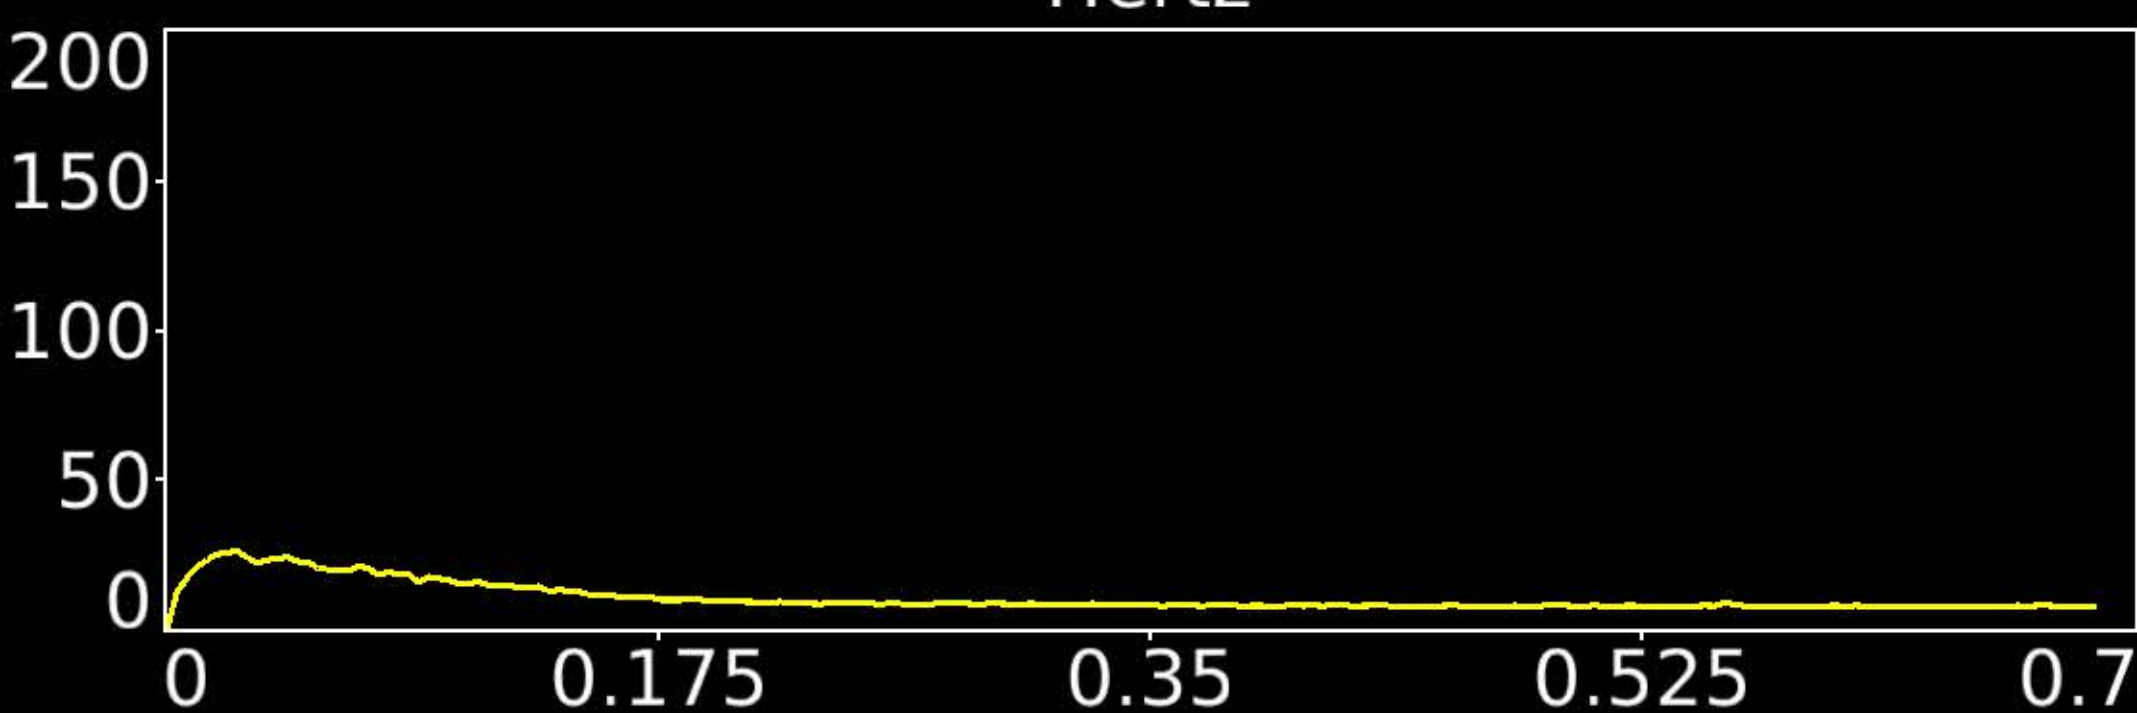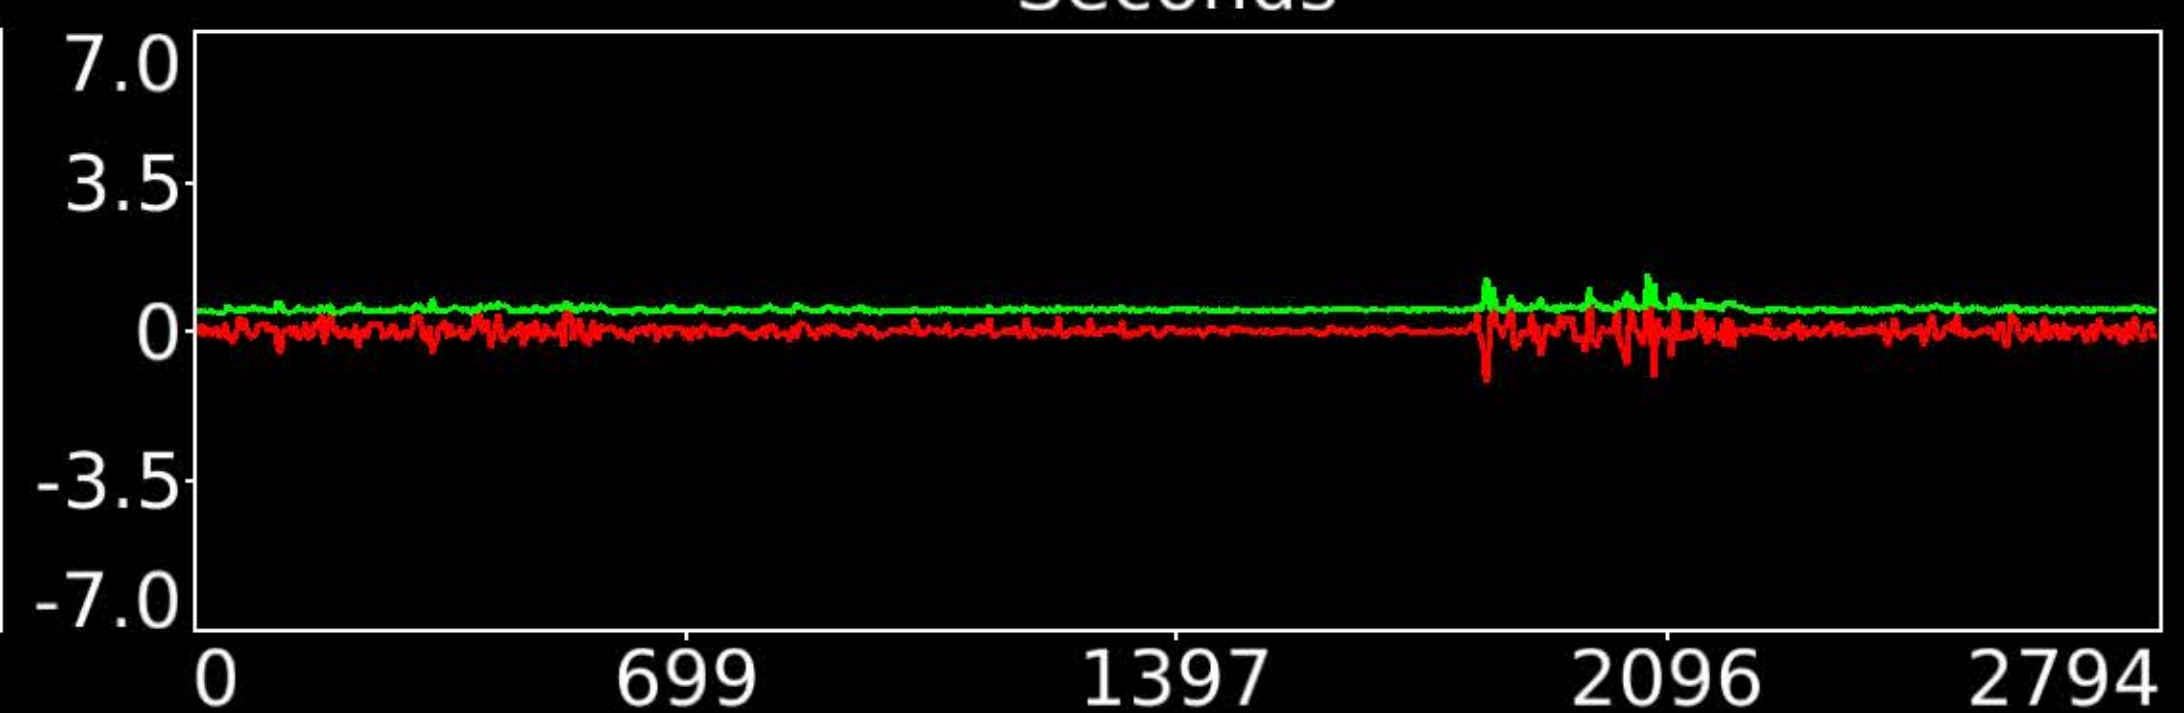

|                           |                            |                                            |  |
|---------------------------|----------------------------|--------------------------------------------|--|
| Number & Class: 69 Signal |                            | Name: Visuotopic: Paracentral Right > Left |  |
| RVT Correlated: No        | DVARS Dip Associated: No   | Cross-Subject Variable: No                 |  |
| Single Subject: No        | % Variance Explained: 0.45 | Globality Index: 0.65                      |  |
| Rest Component: 84        | Taskr Component: -57       | Task Modulated: No                         |  |

Rationale: Spatial map includes positive and negative patches that respect known retinotopic visual organization (Foveal Right vs Left)



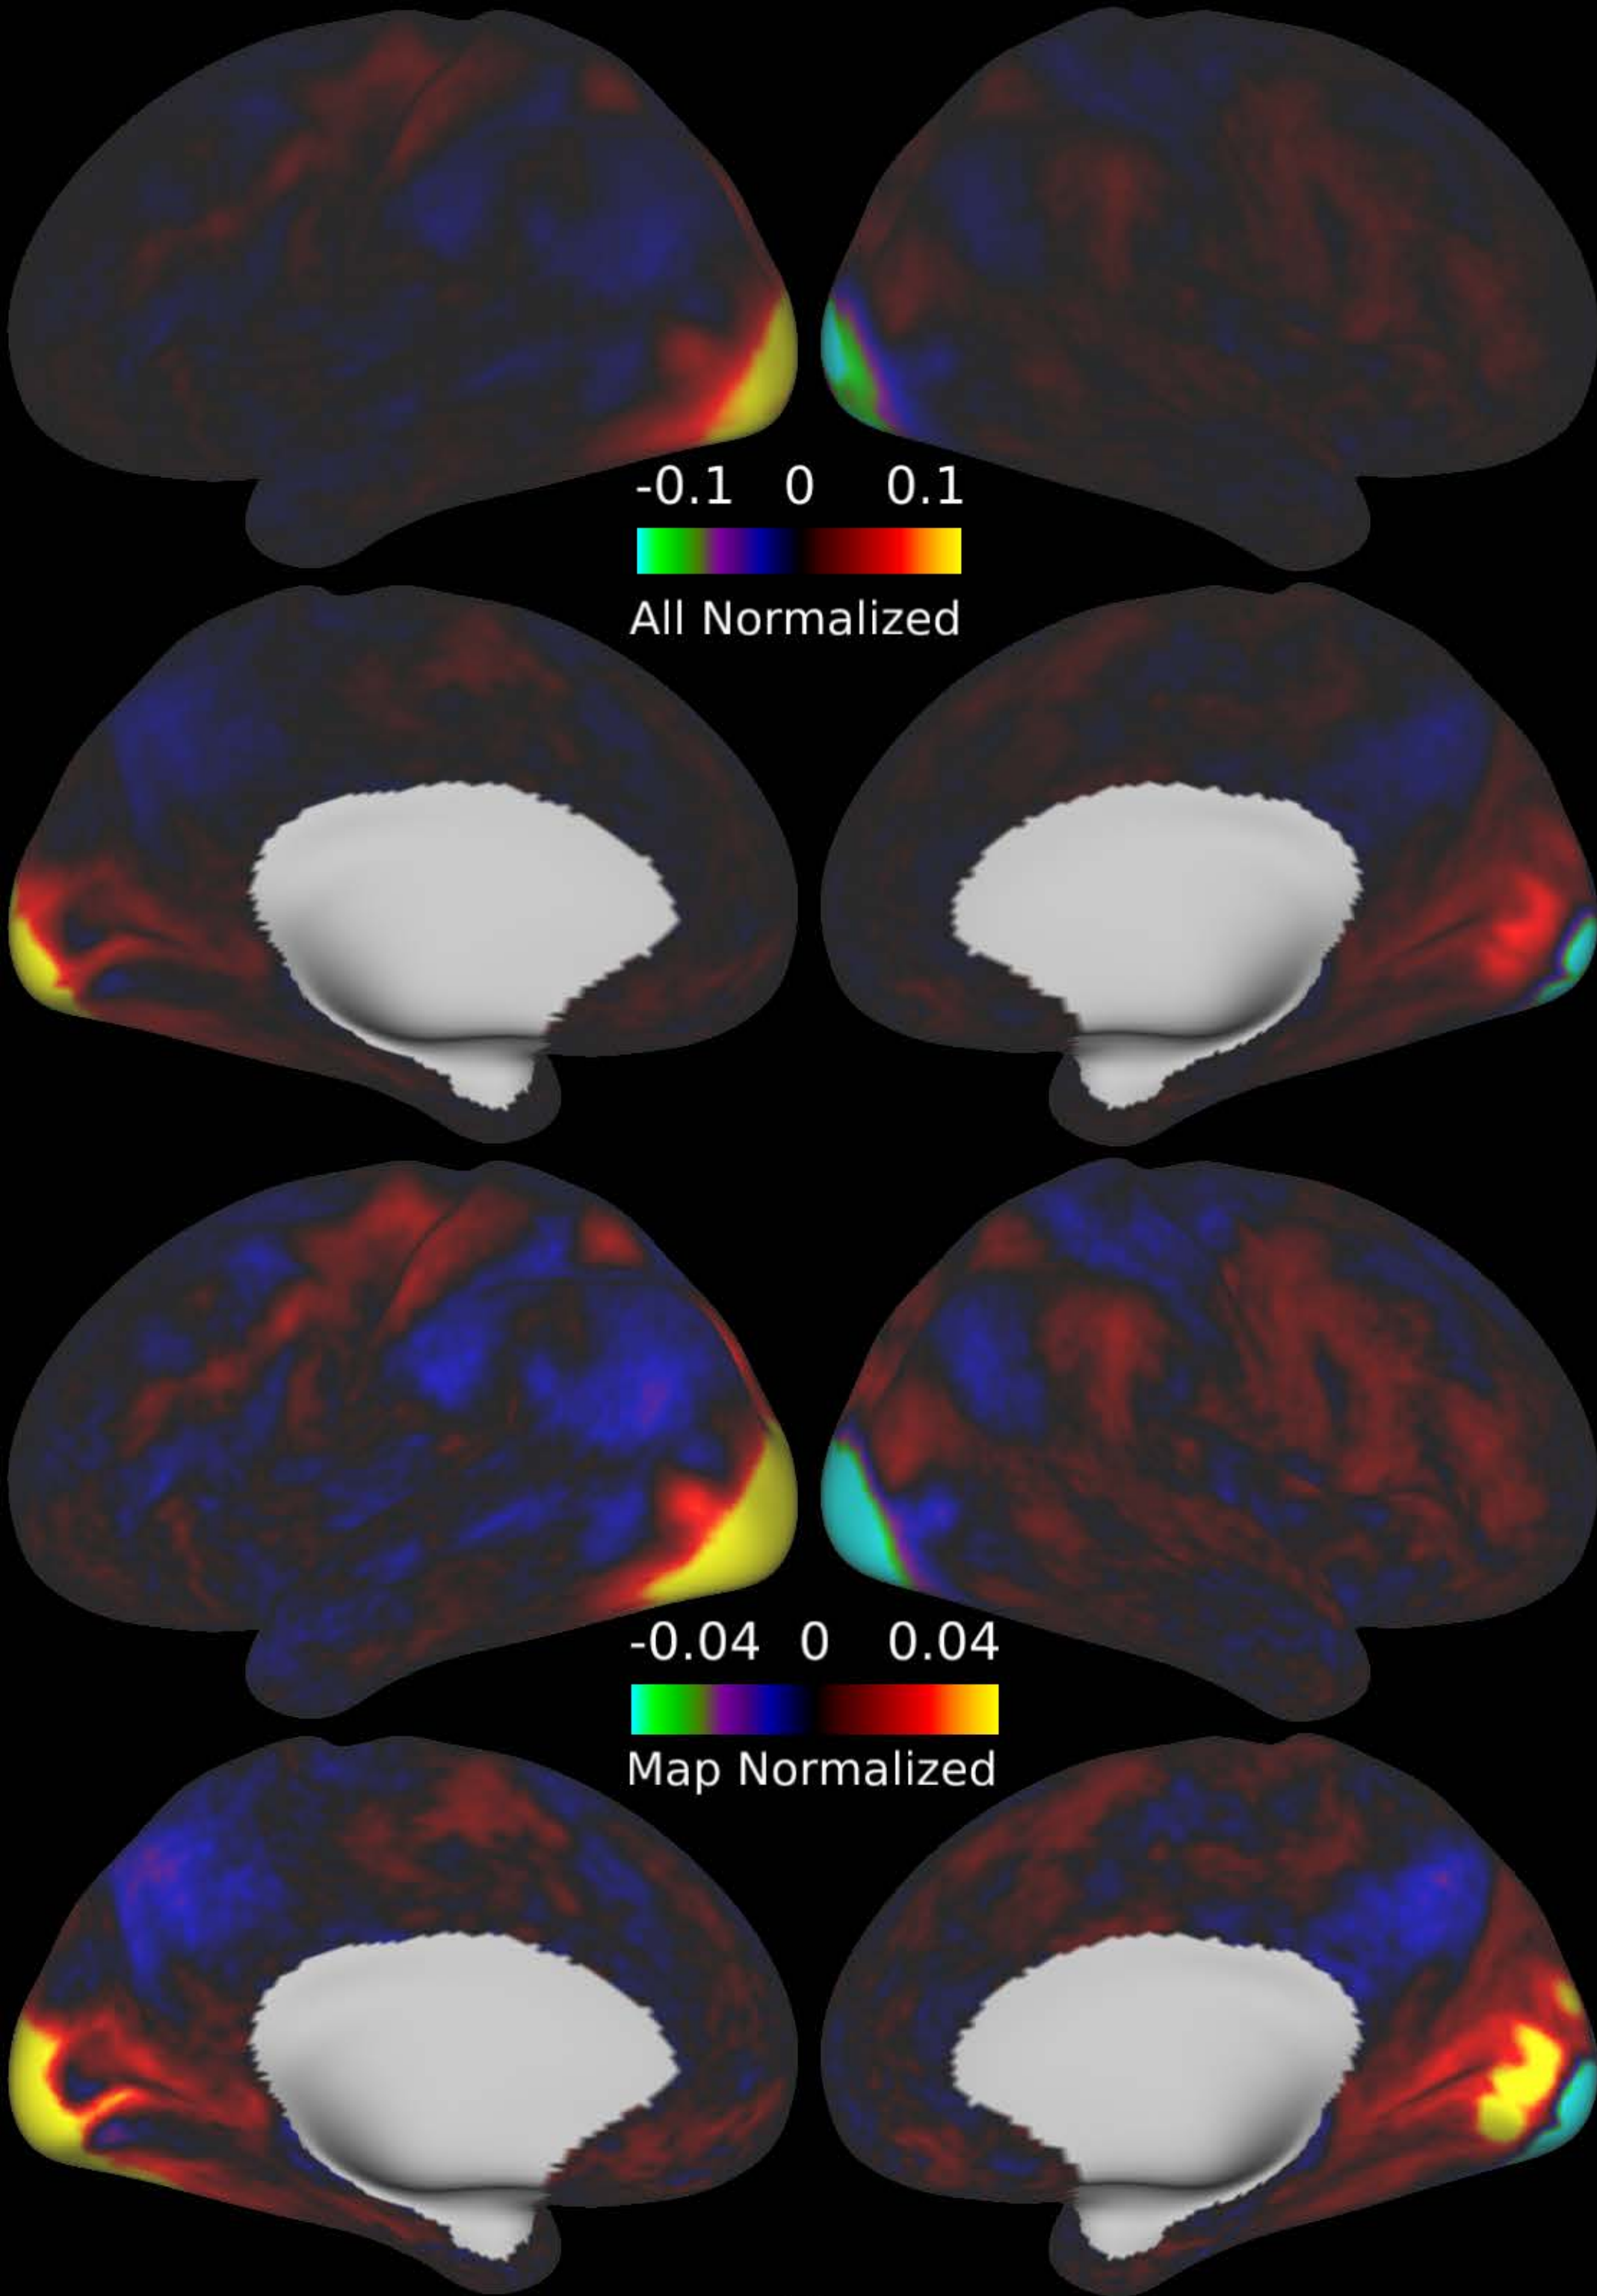

Hertz

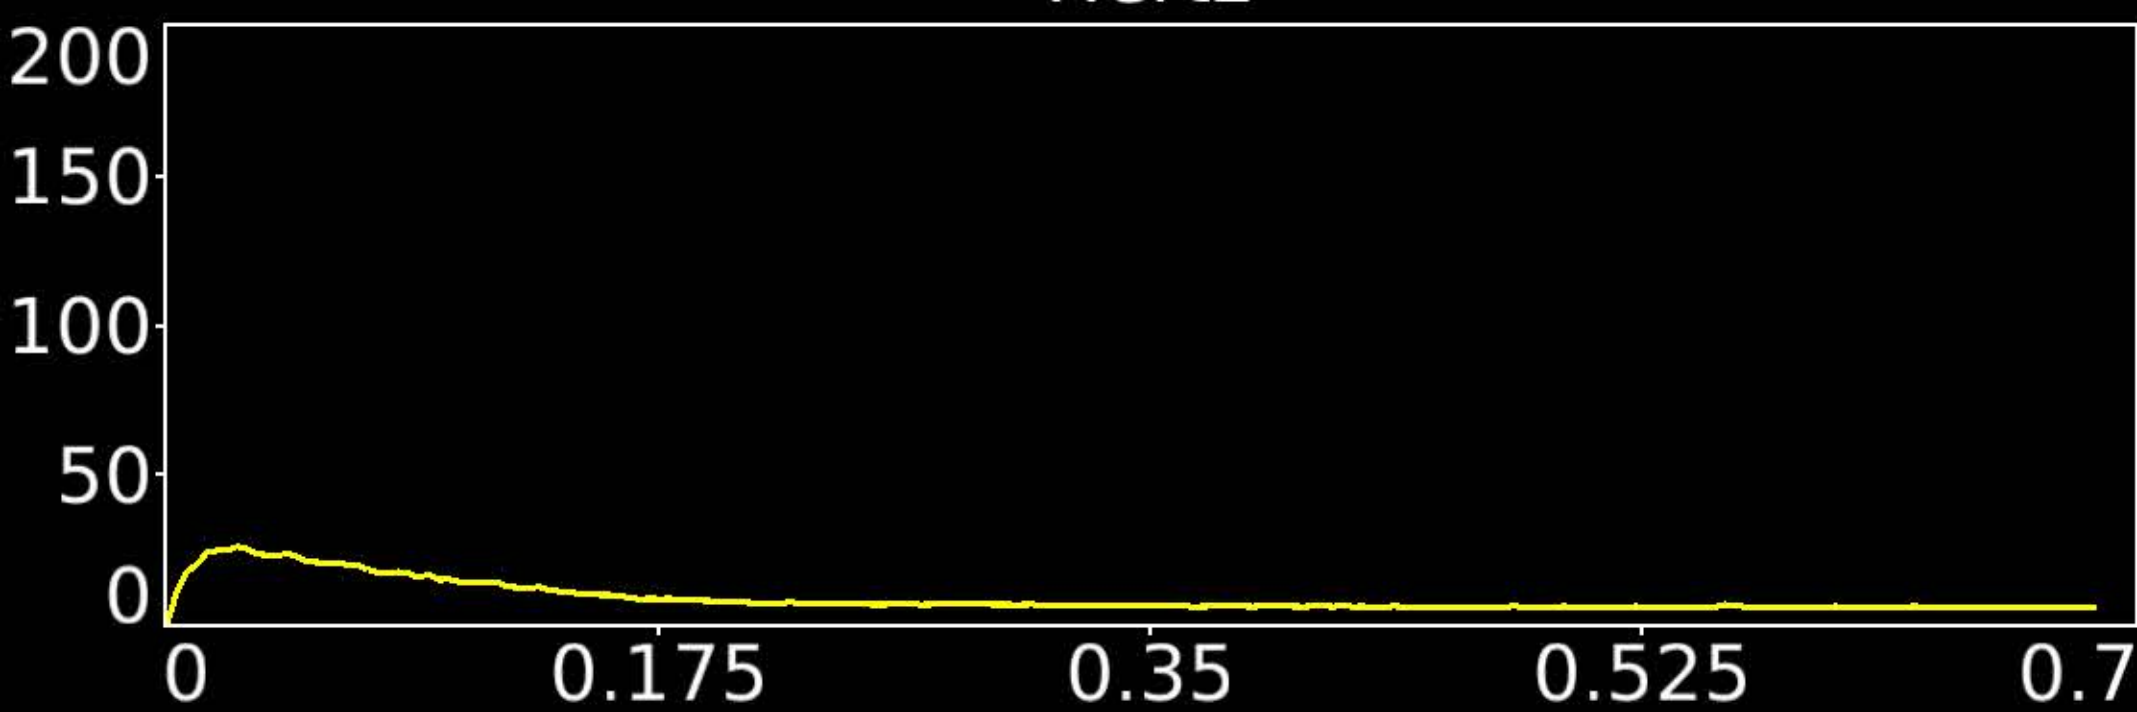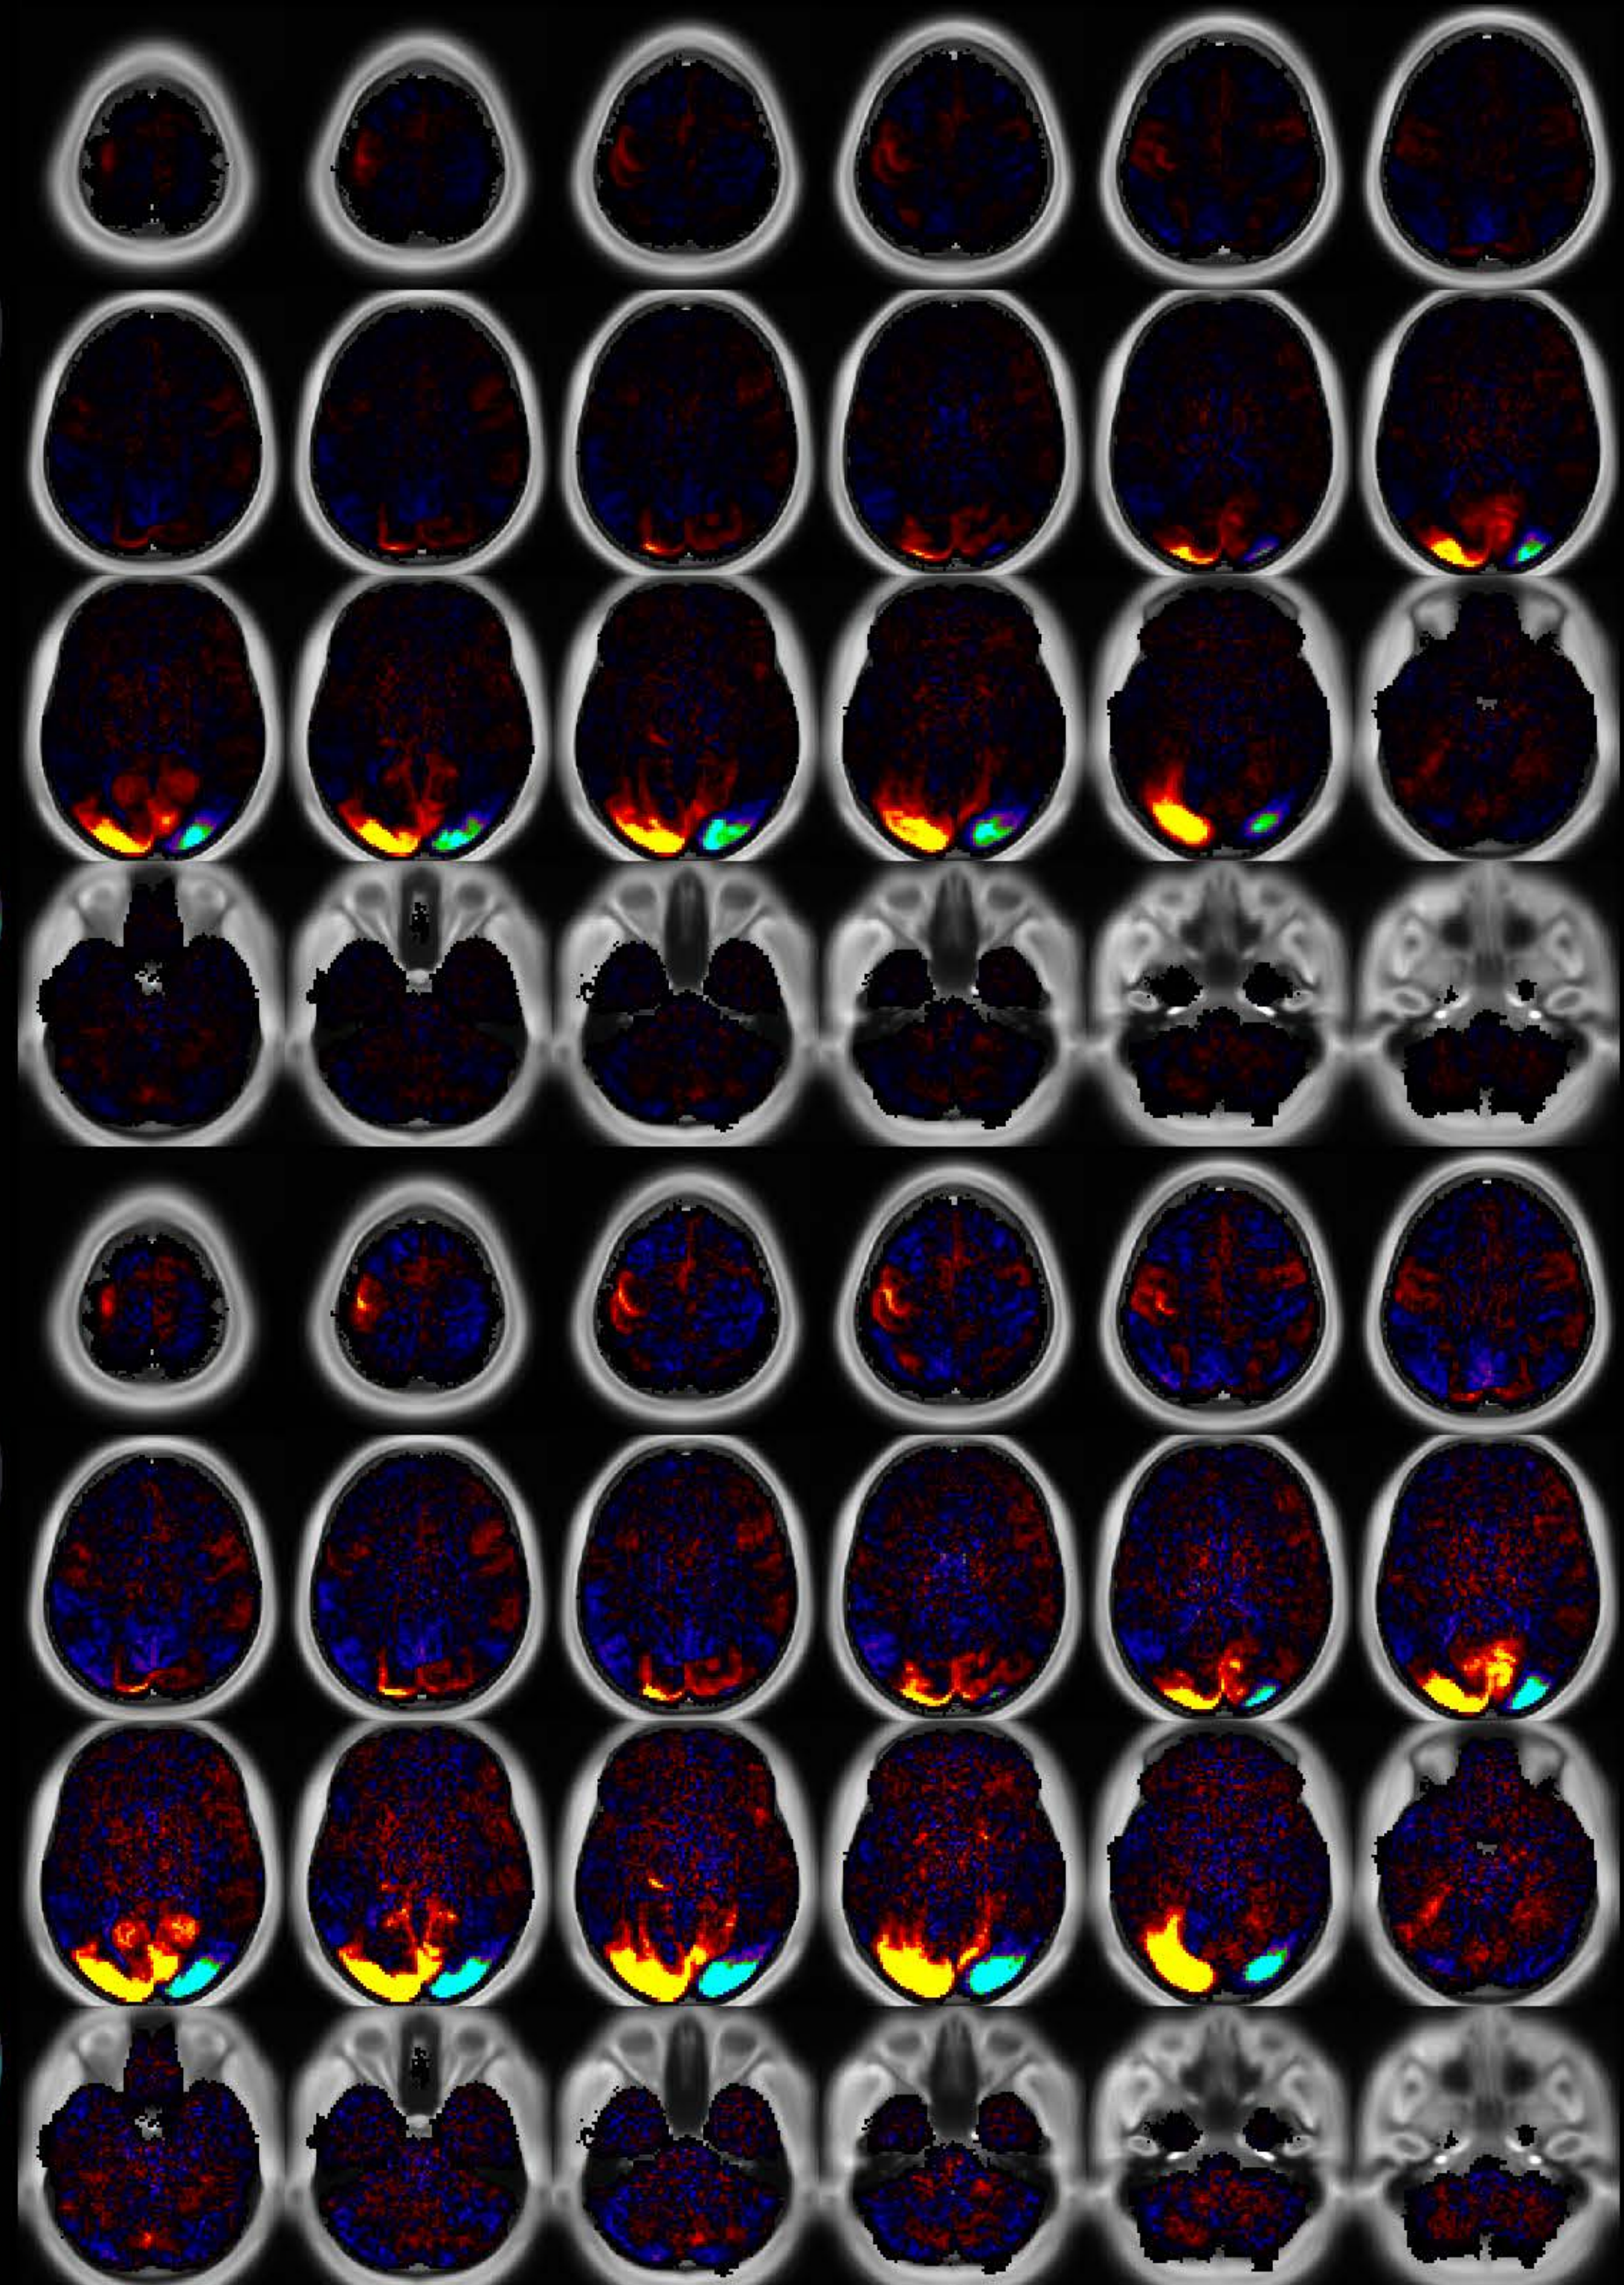

Seconds

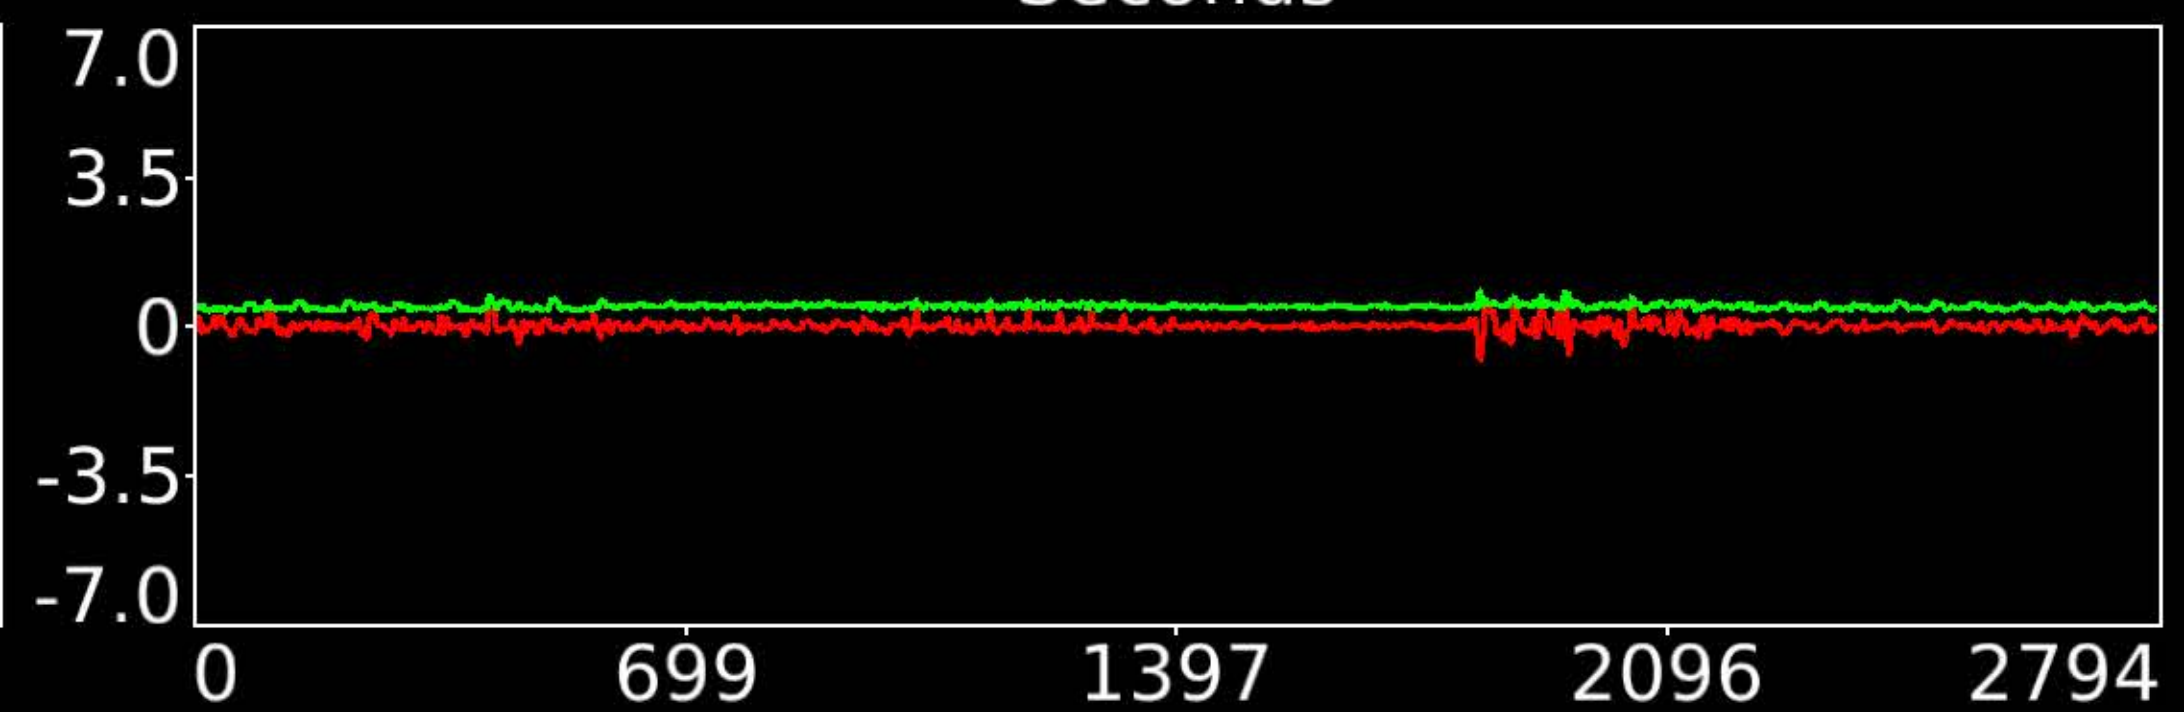

|                           |                            |                                       |  |
|---------------------------|----------------------------|---------------------------------------|--|
| Number & Class: 70 Signal |                            | Name: Visuotopic: Foveal Left > Right |  |
| RVT Correlated: No        | DVARS Dip Associated: No   | Cross-Subject Variable: No            |  |
| Single Subject: No        | % Variance Explained: 0.37 | Globality Index: 0.26                 |  |
| Rest Component: 81        | Taskr Component: 58        | Task Modulated: No                    |  |

Rationale: Spatial map includes positive and negative patches that respect known retinotopic visual organization (Peripheral Right vs Left)
