# Supplementary material
Source: PubMed Central journal article supplement (PMC6237431)
Supplement: NIHMS1502867-supplement-3.pdf [file NIHMS1502867-supplement-3.pdf]

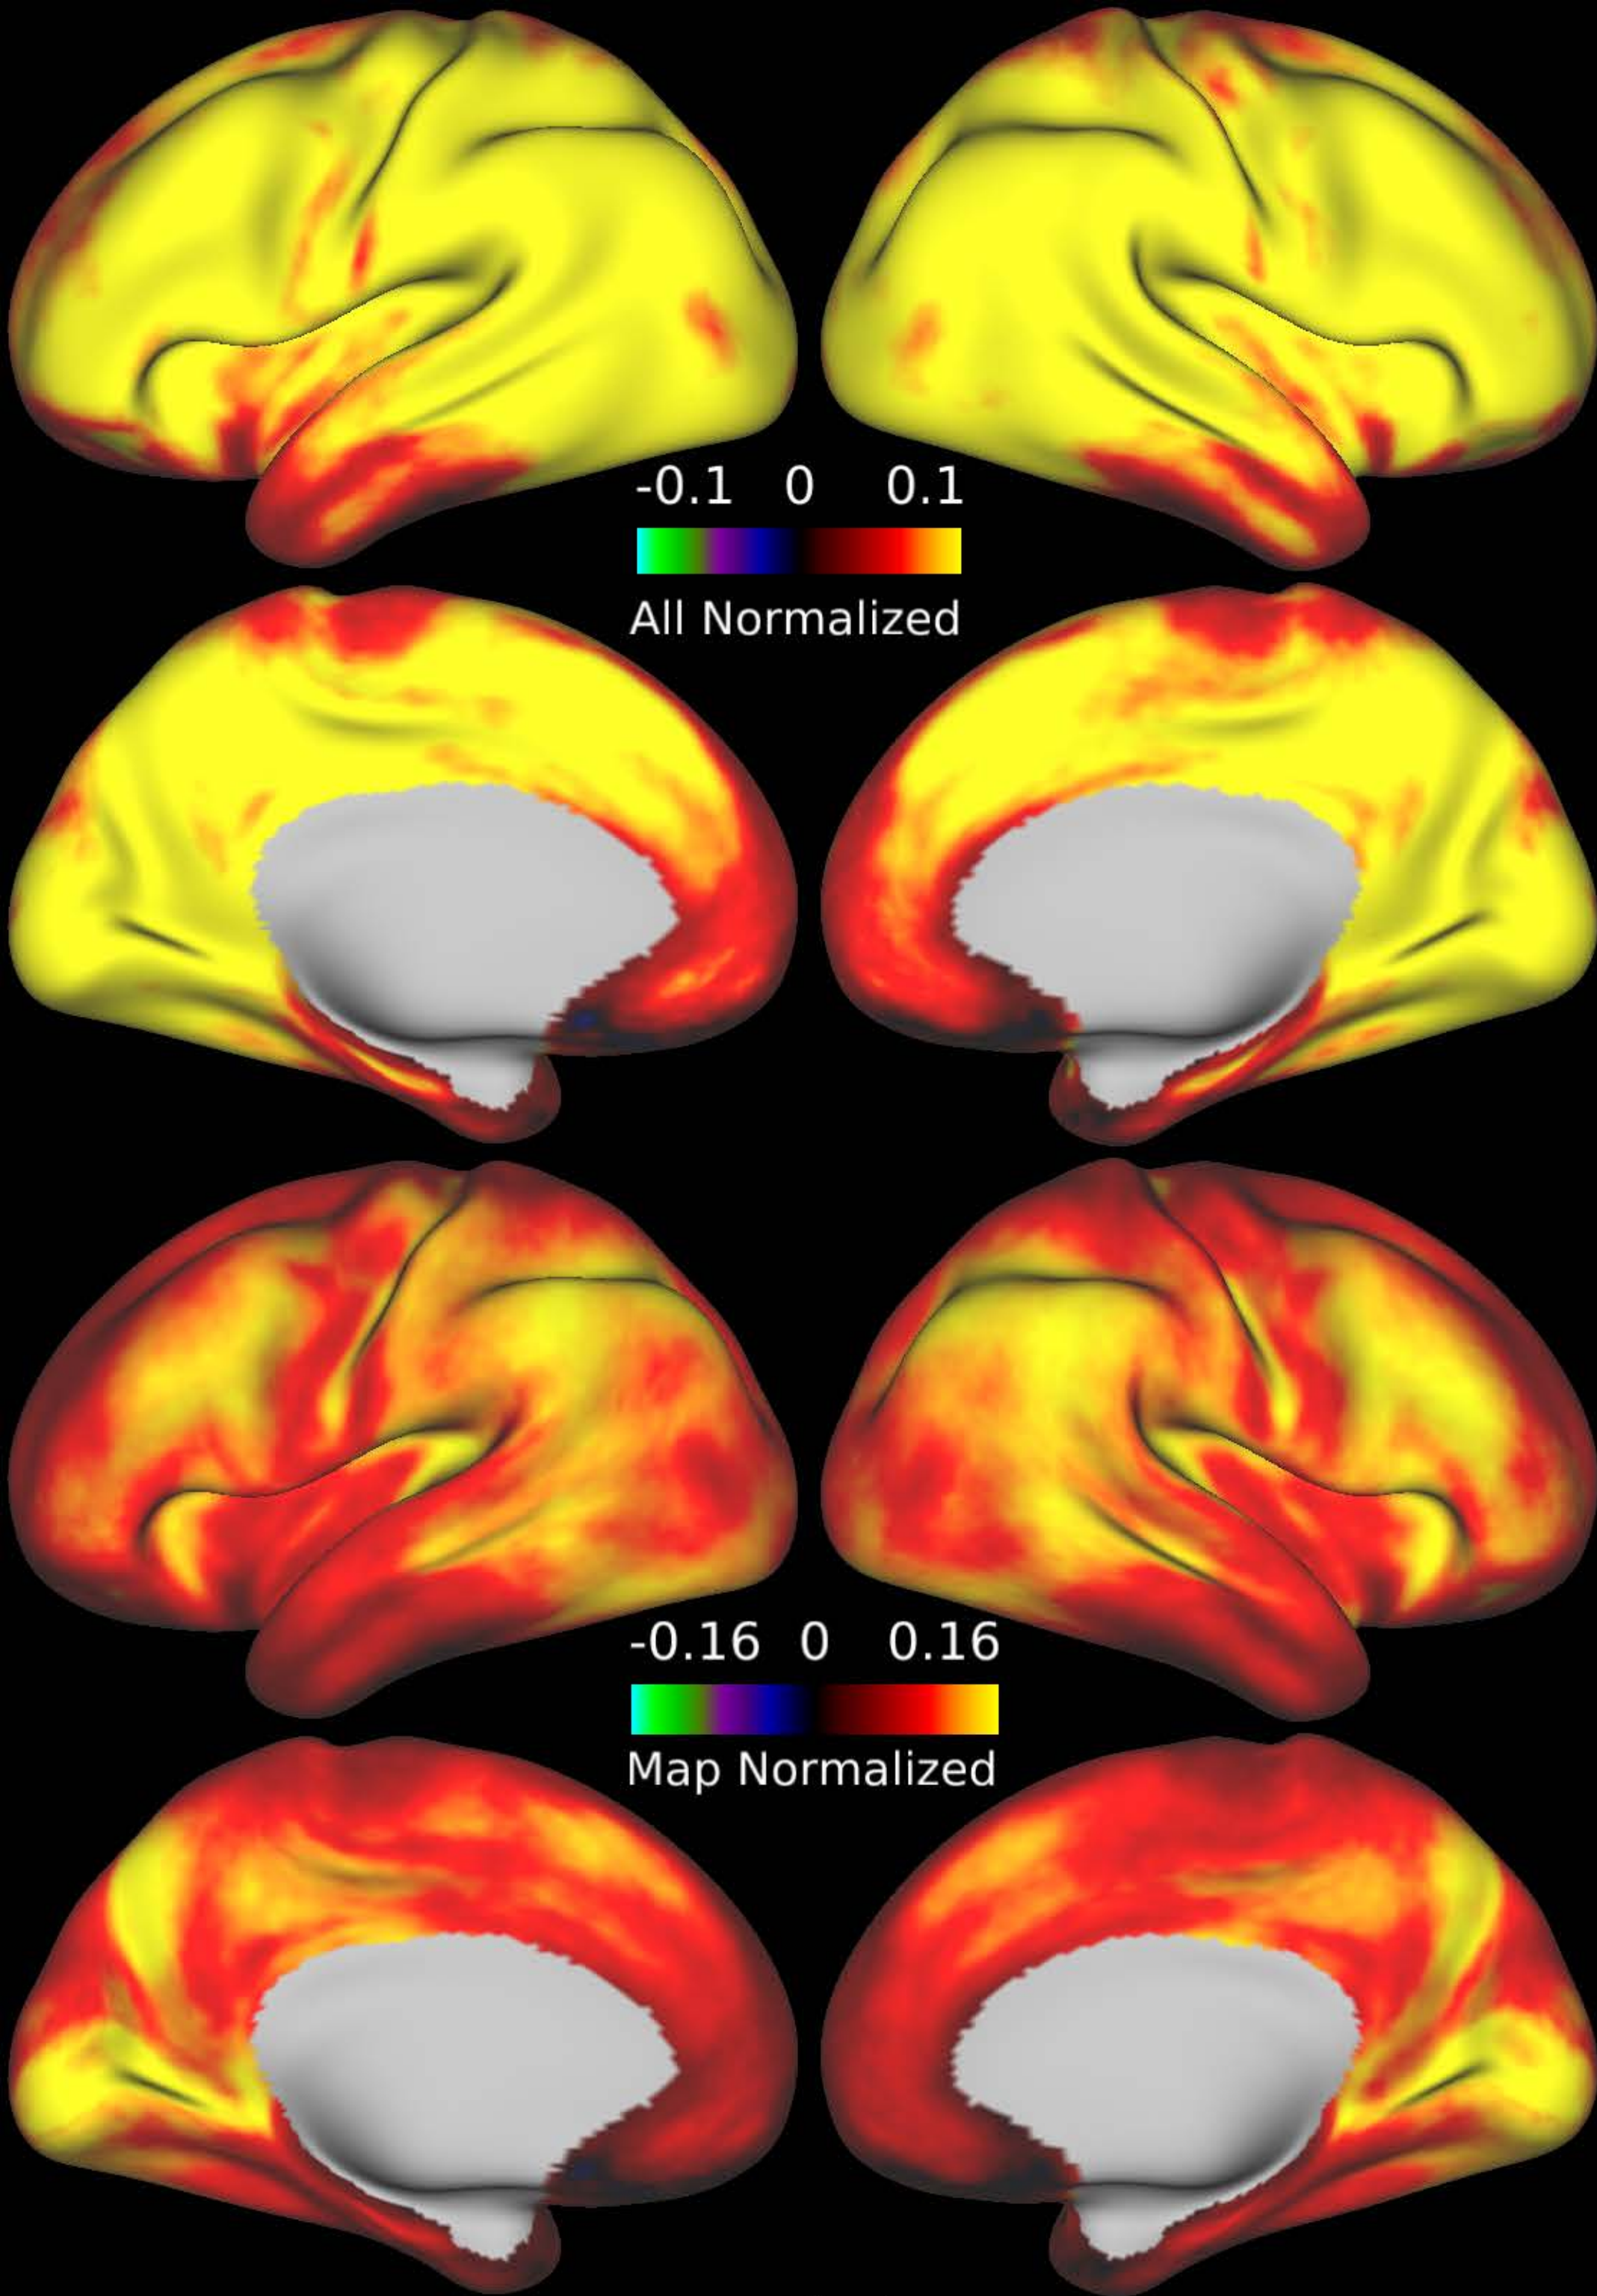

Hertz

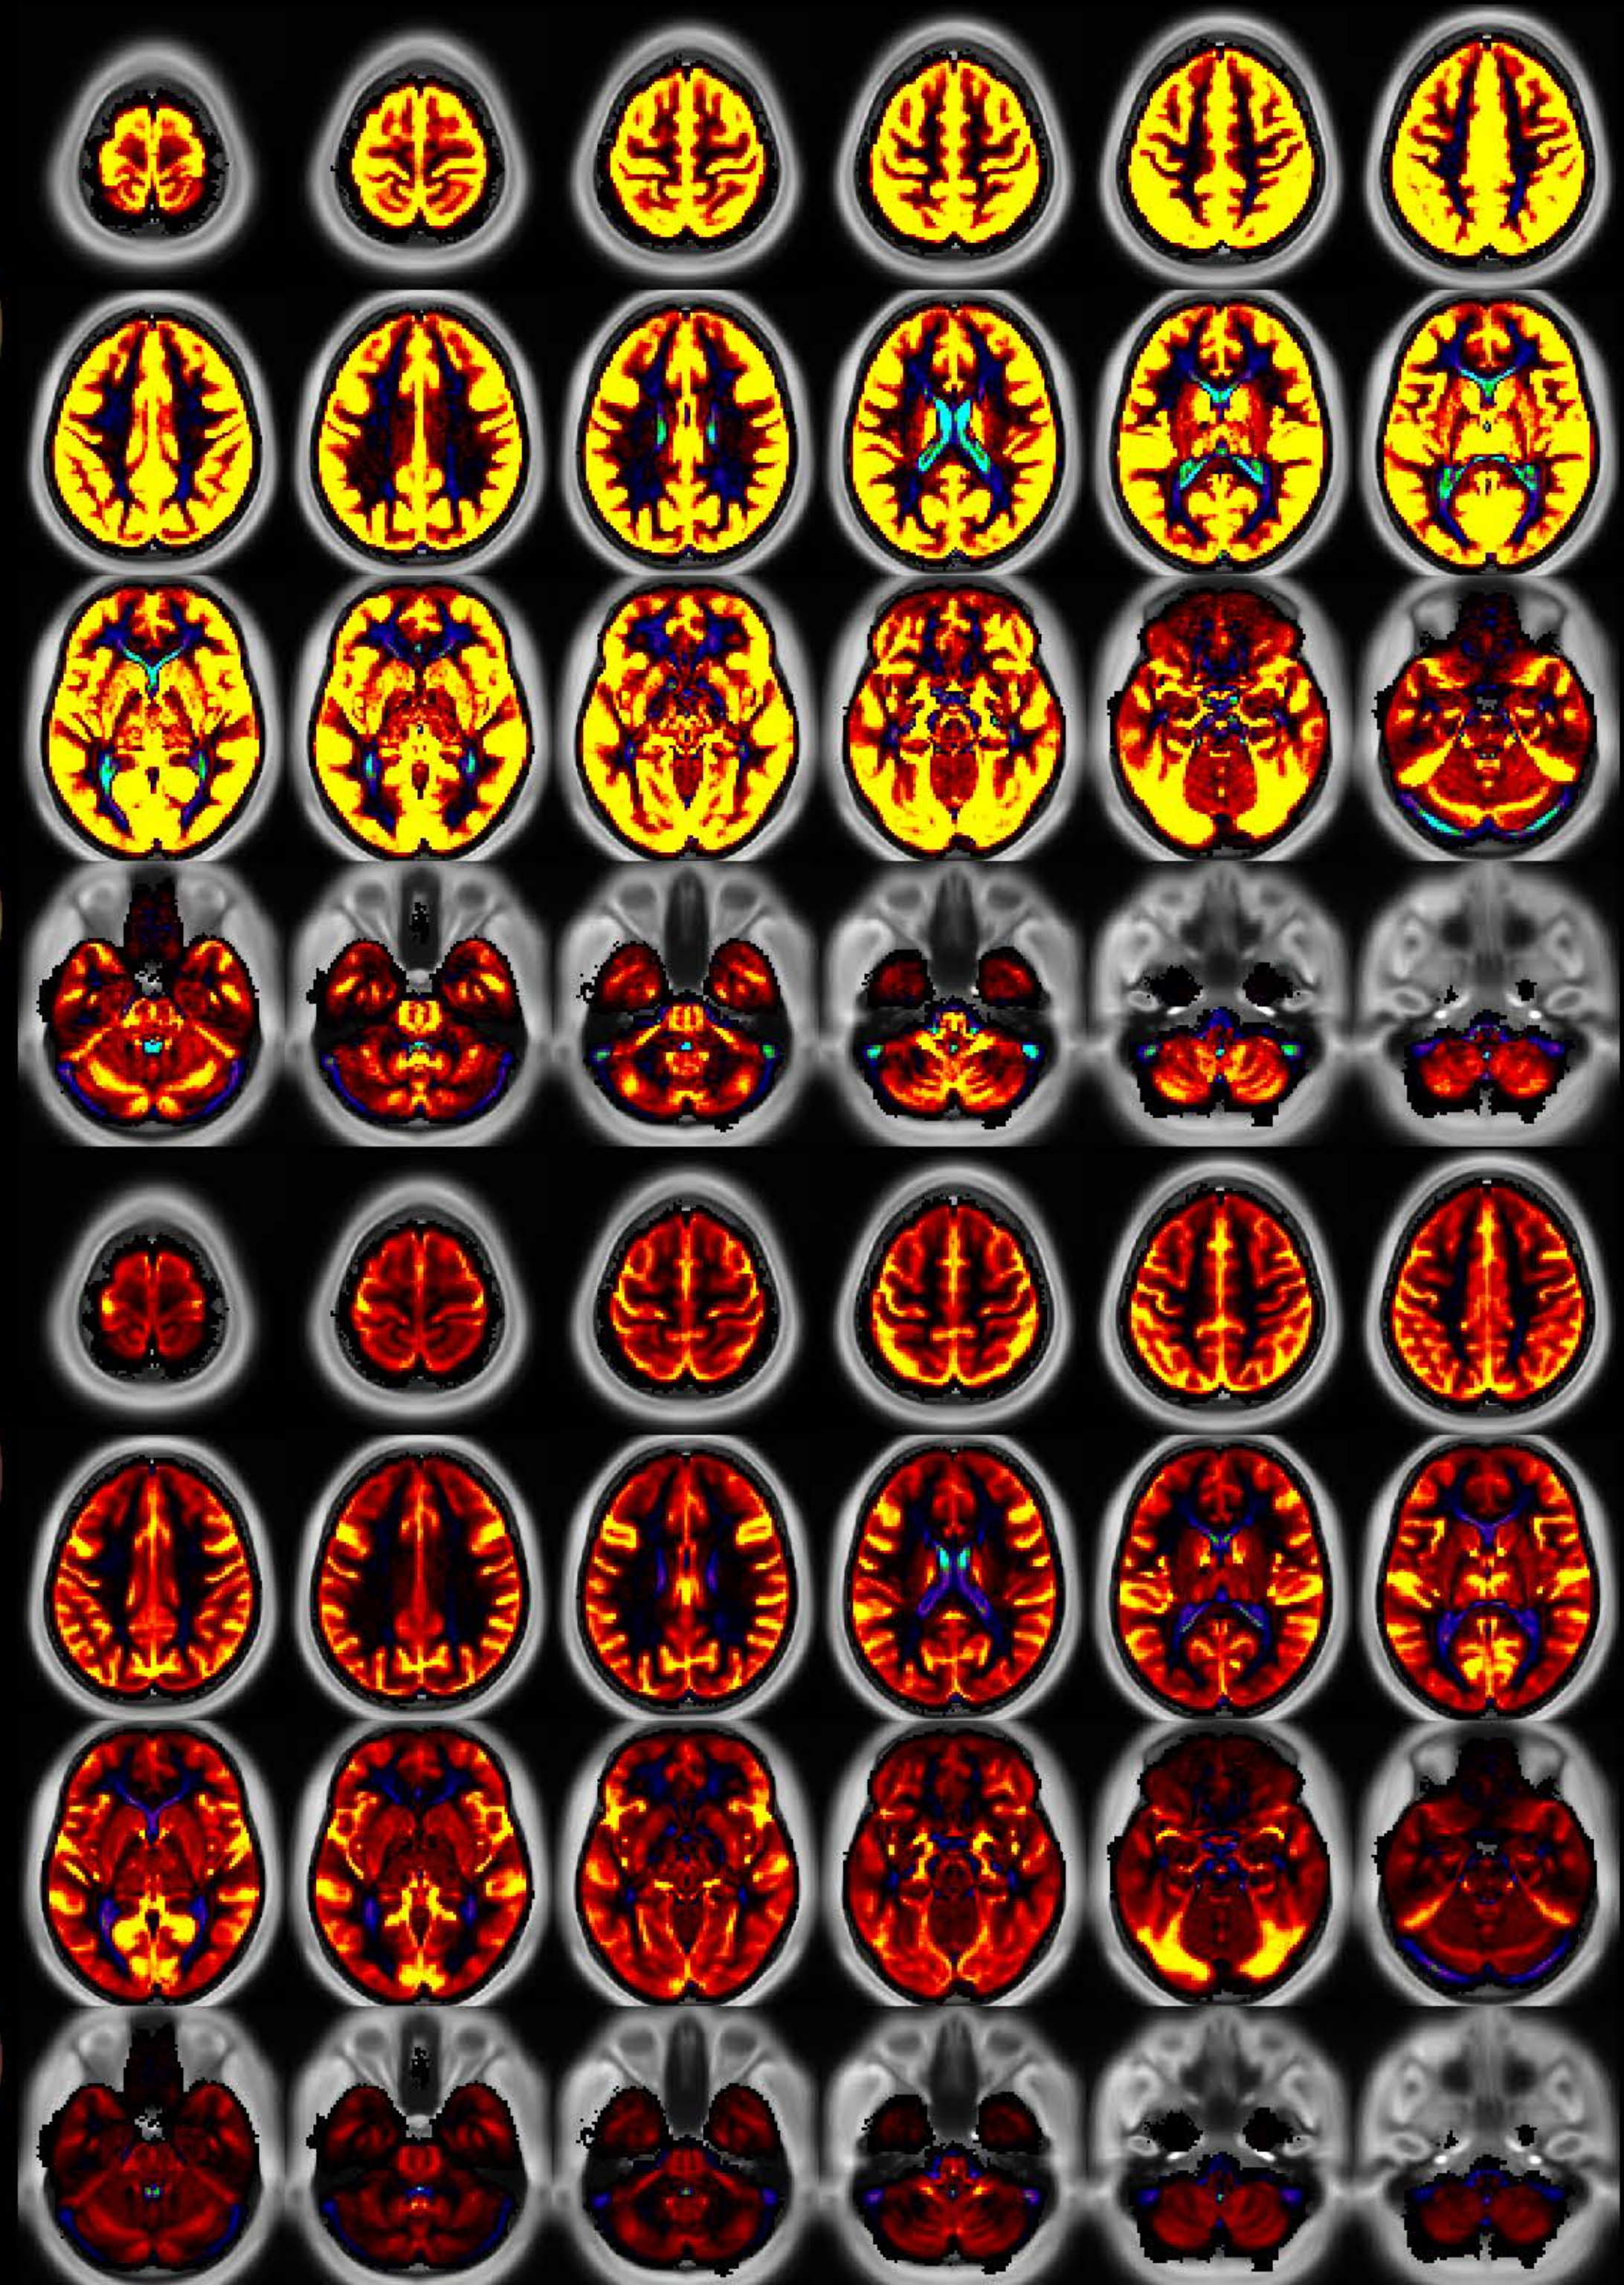

Seconds

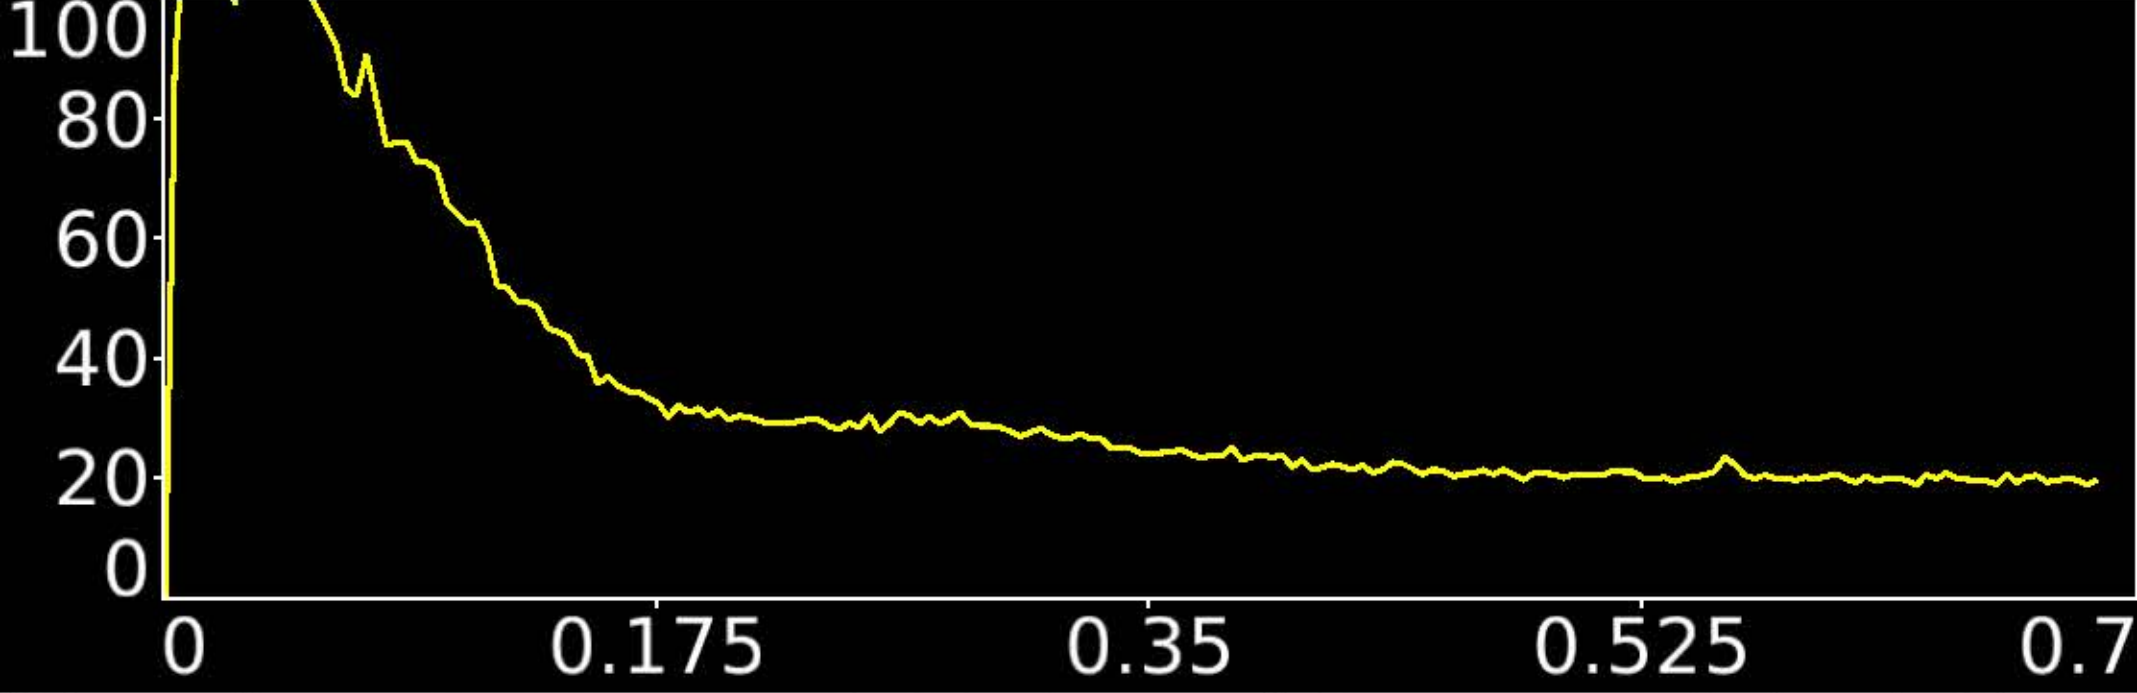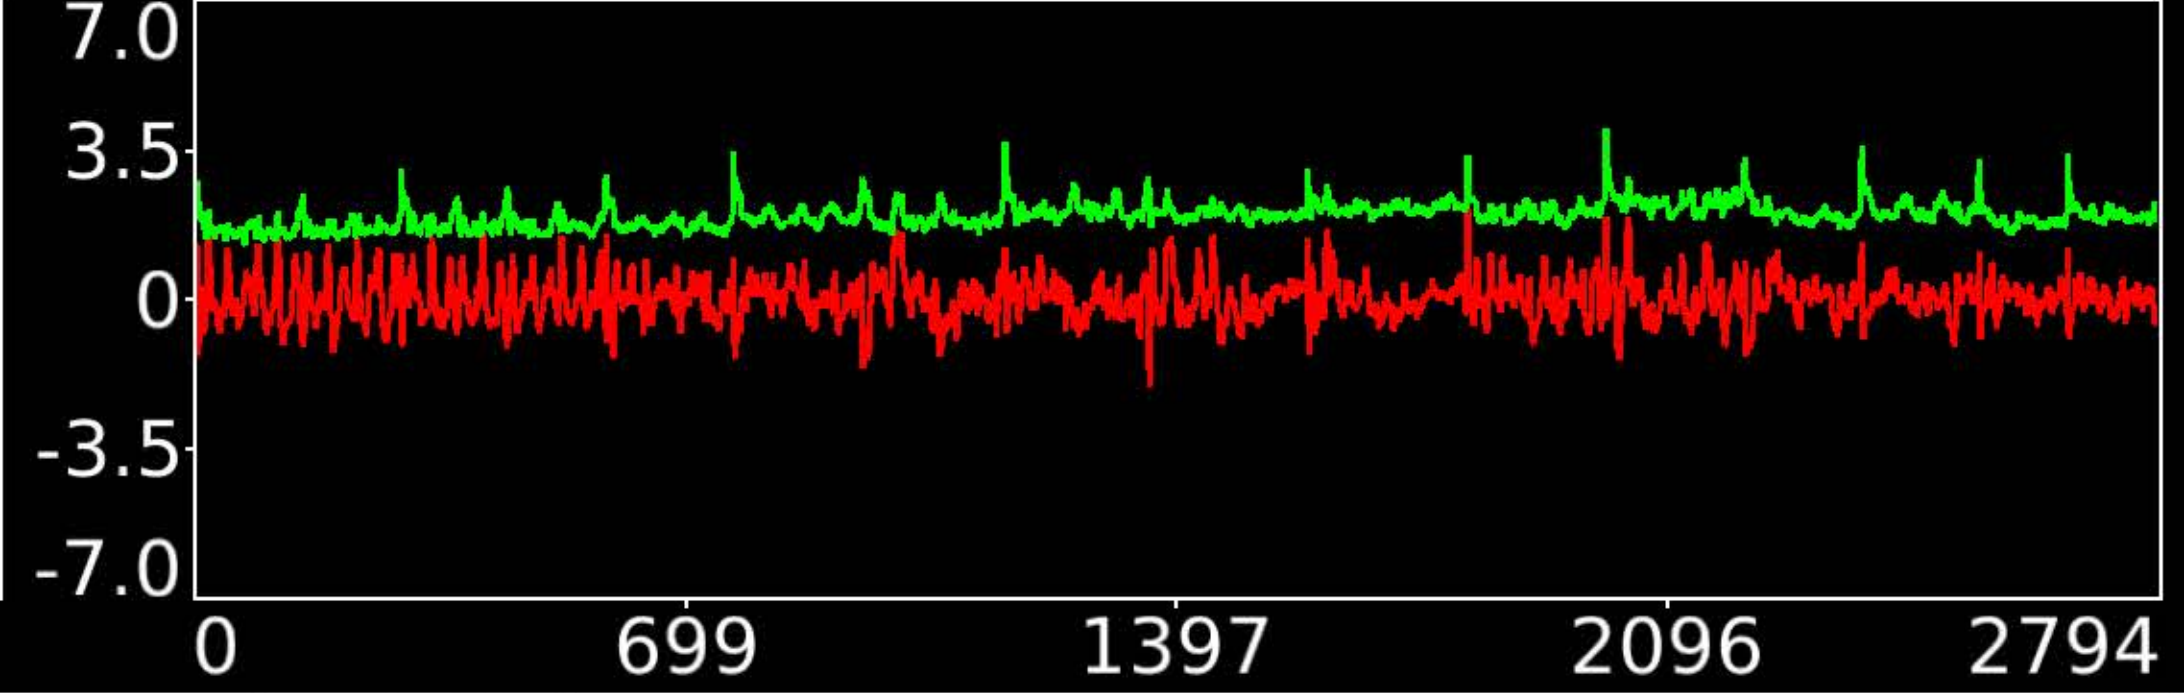

|                         |                            |                                  |  |
|-------------------------|----------------------------|----------------------------------|--|
| Number & Class: 1 Noise |                            | Name: Global Physiological Noise |  |
| RVT Correlated: Yes     | DVARS Dip Associated: Yes  | Cross-Subject Variable: Yes      |  |
| Single Subject: No      | % Variance Explained: 7.85 | Globality Index: 5.91            |  |
| Task Component: 1       | Rest Component: 3+6+8      | Task Modulated: No               |  |

Rationale: Globally positive component matching hypothesized pattern for physiological artifact and does not clearly follow known areal boundaries



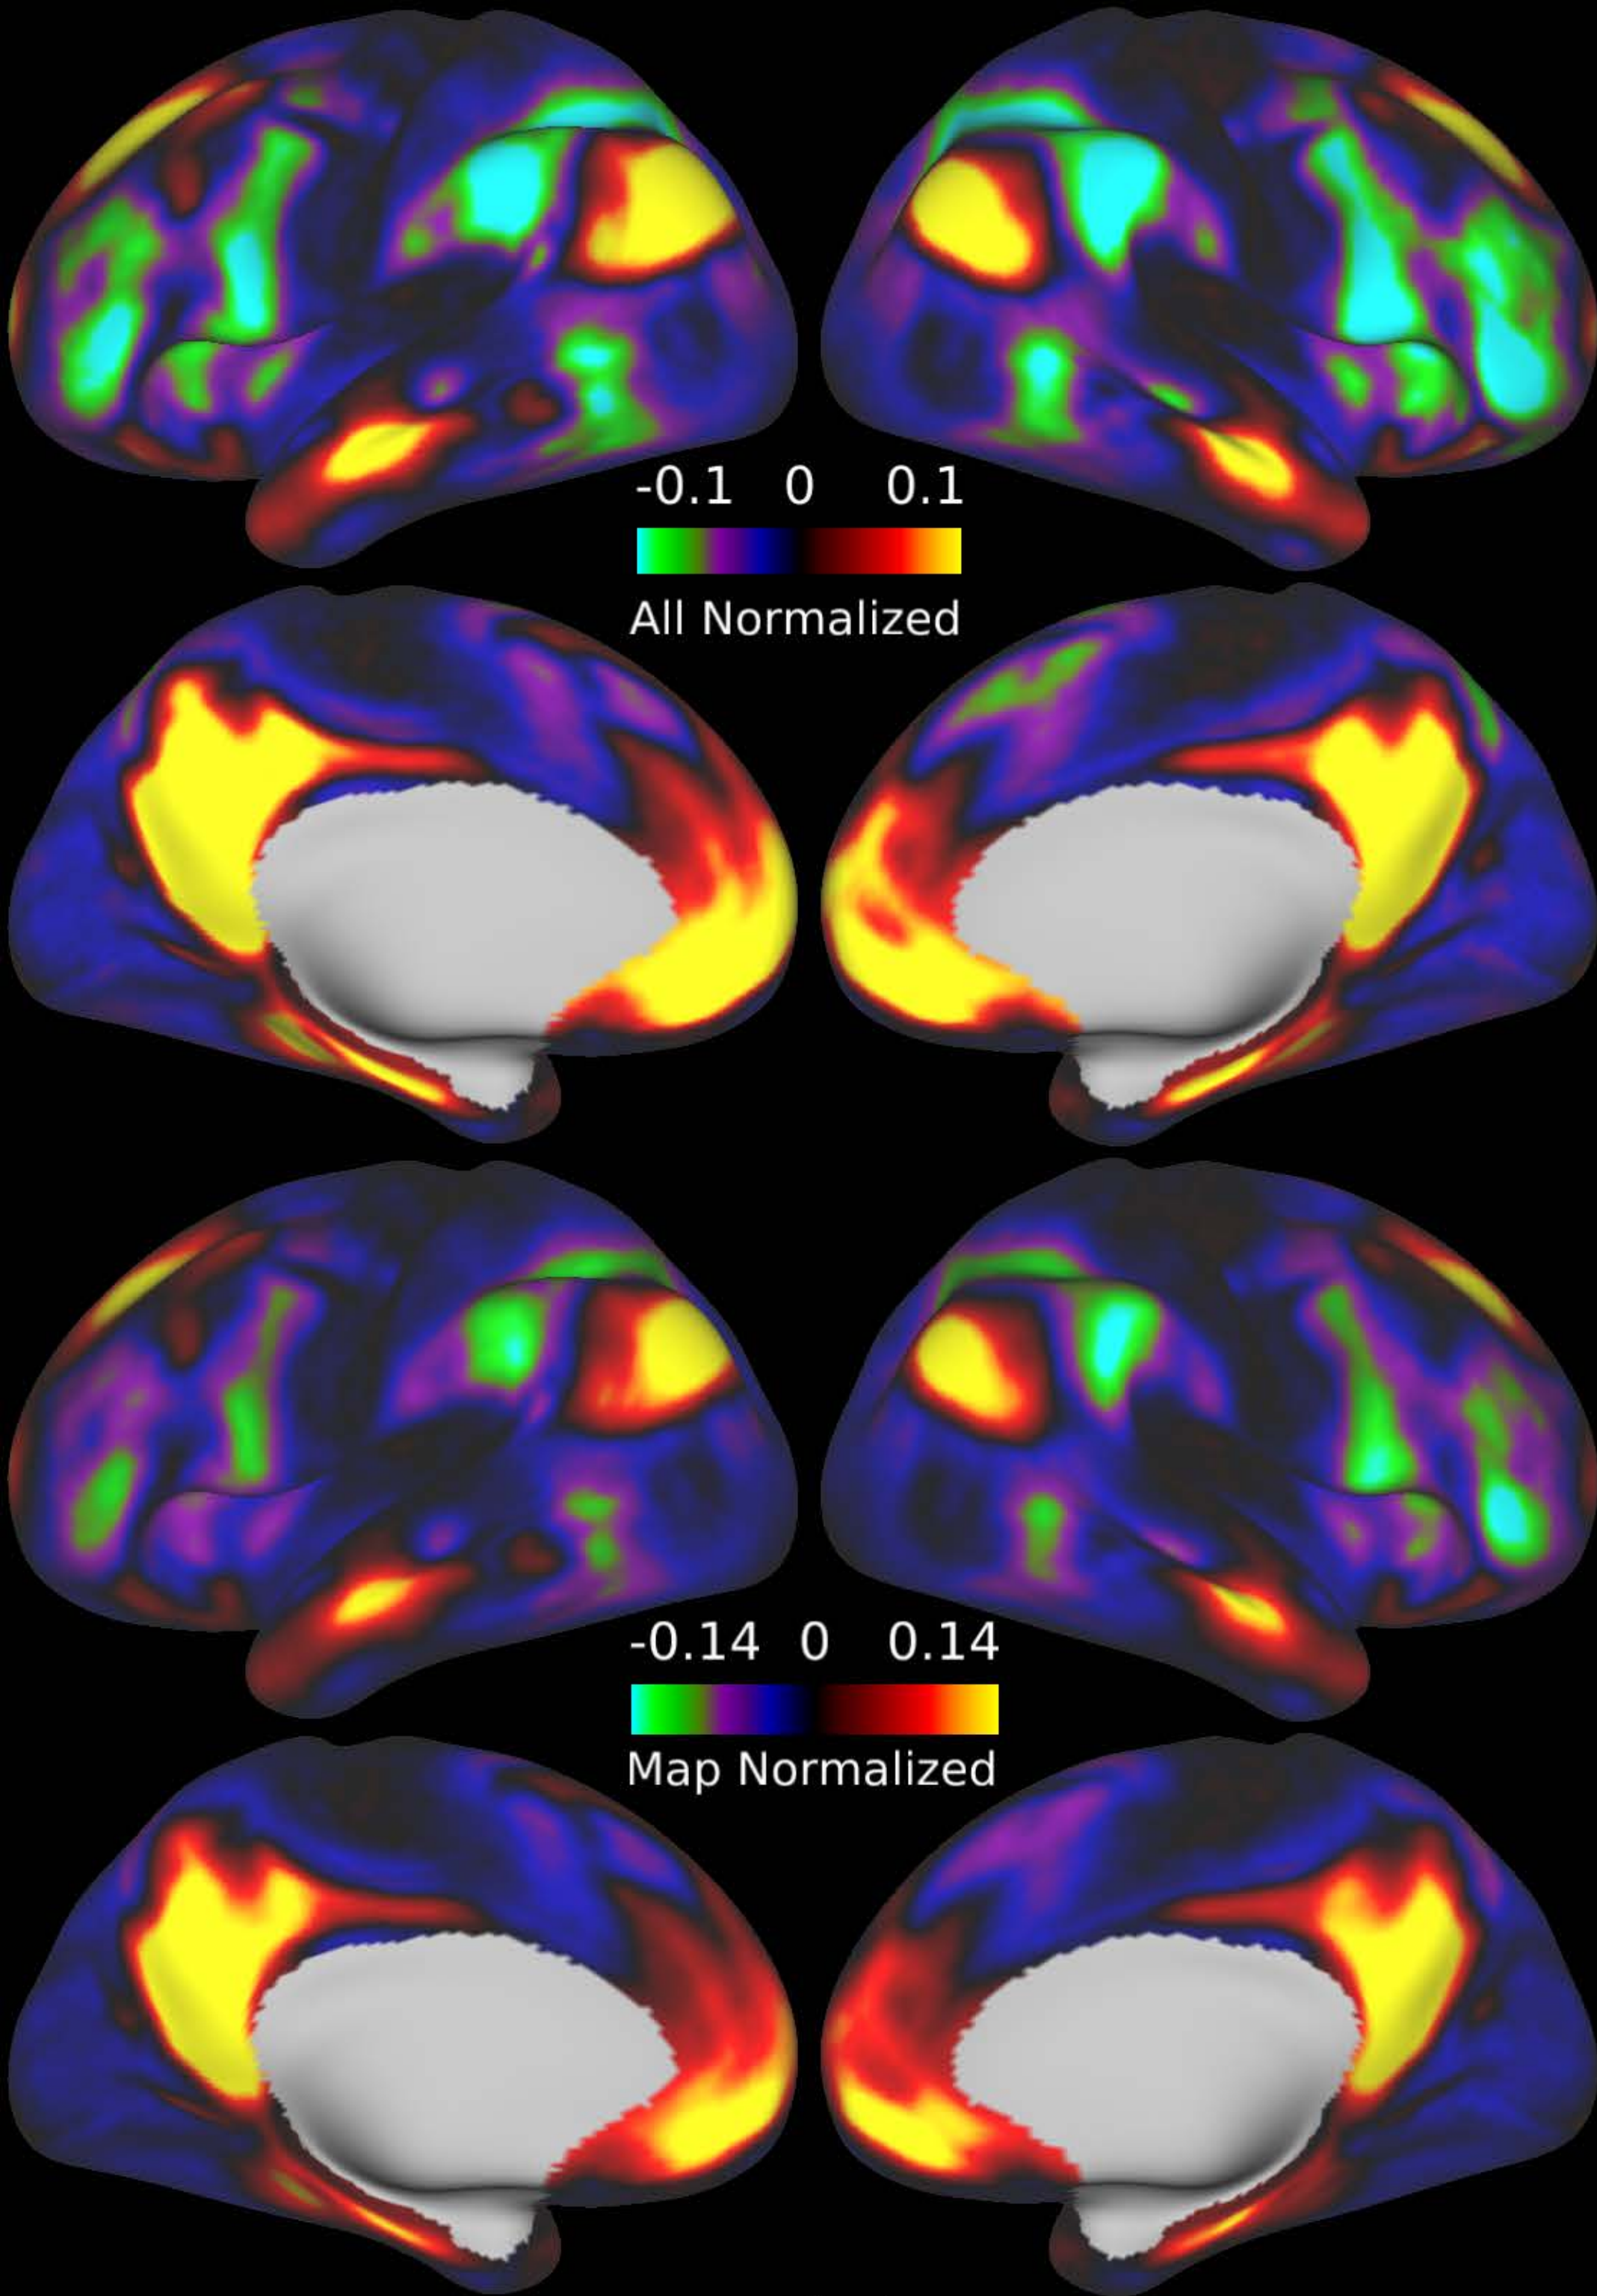

Hertz

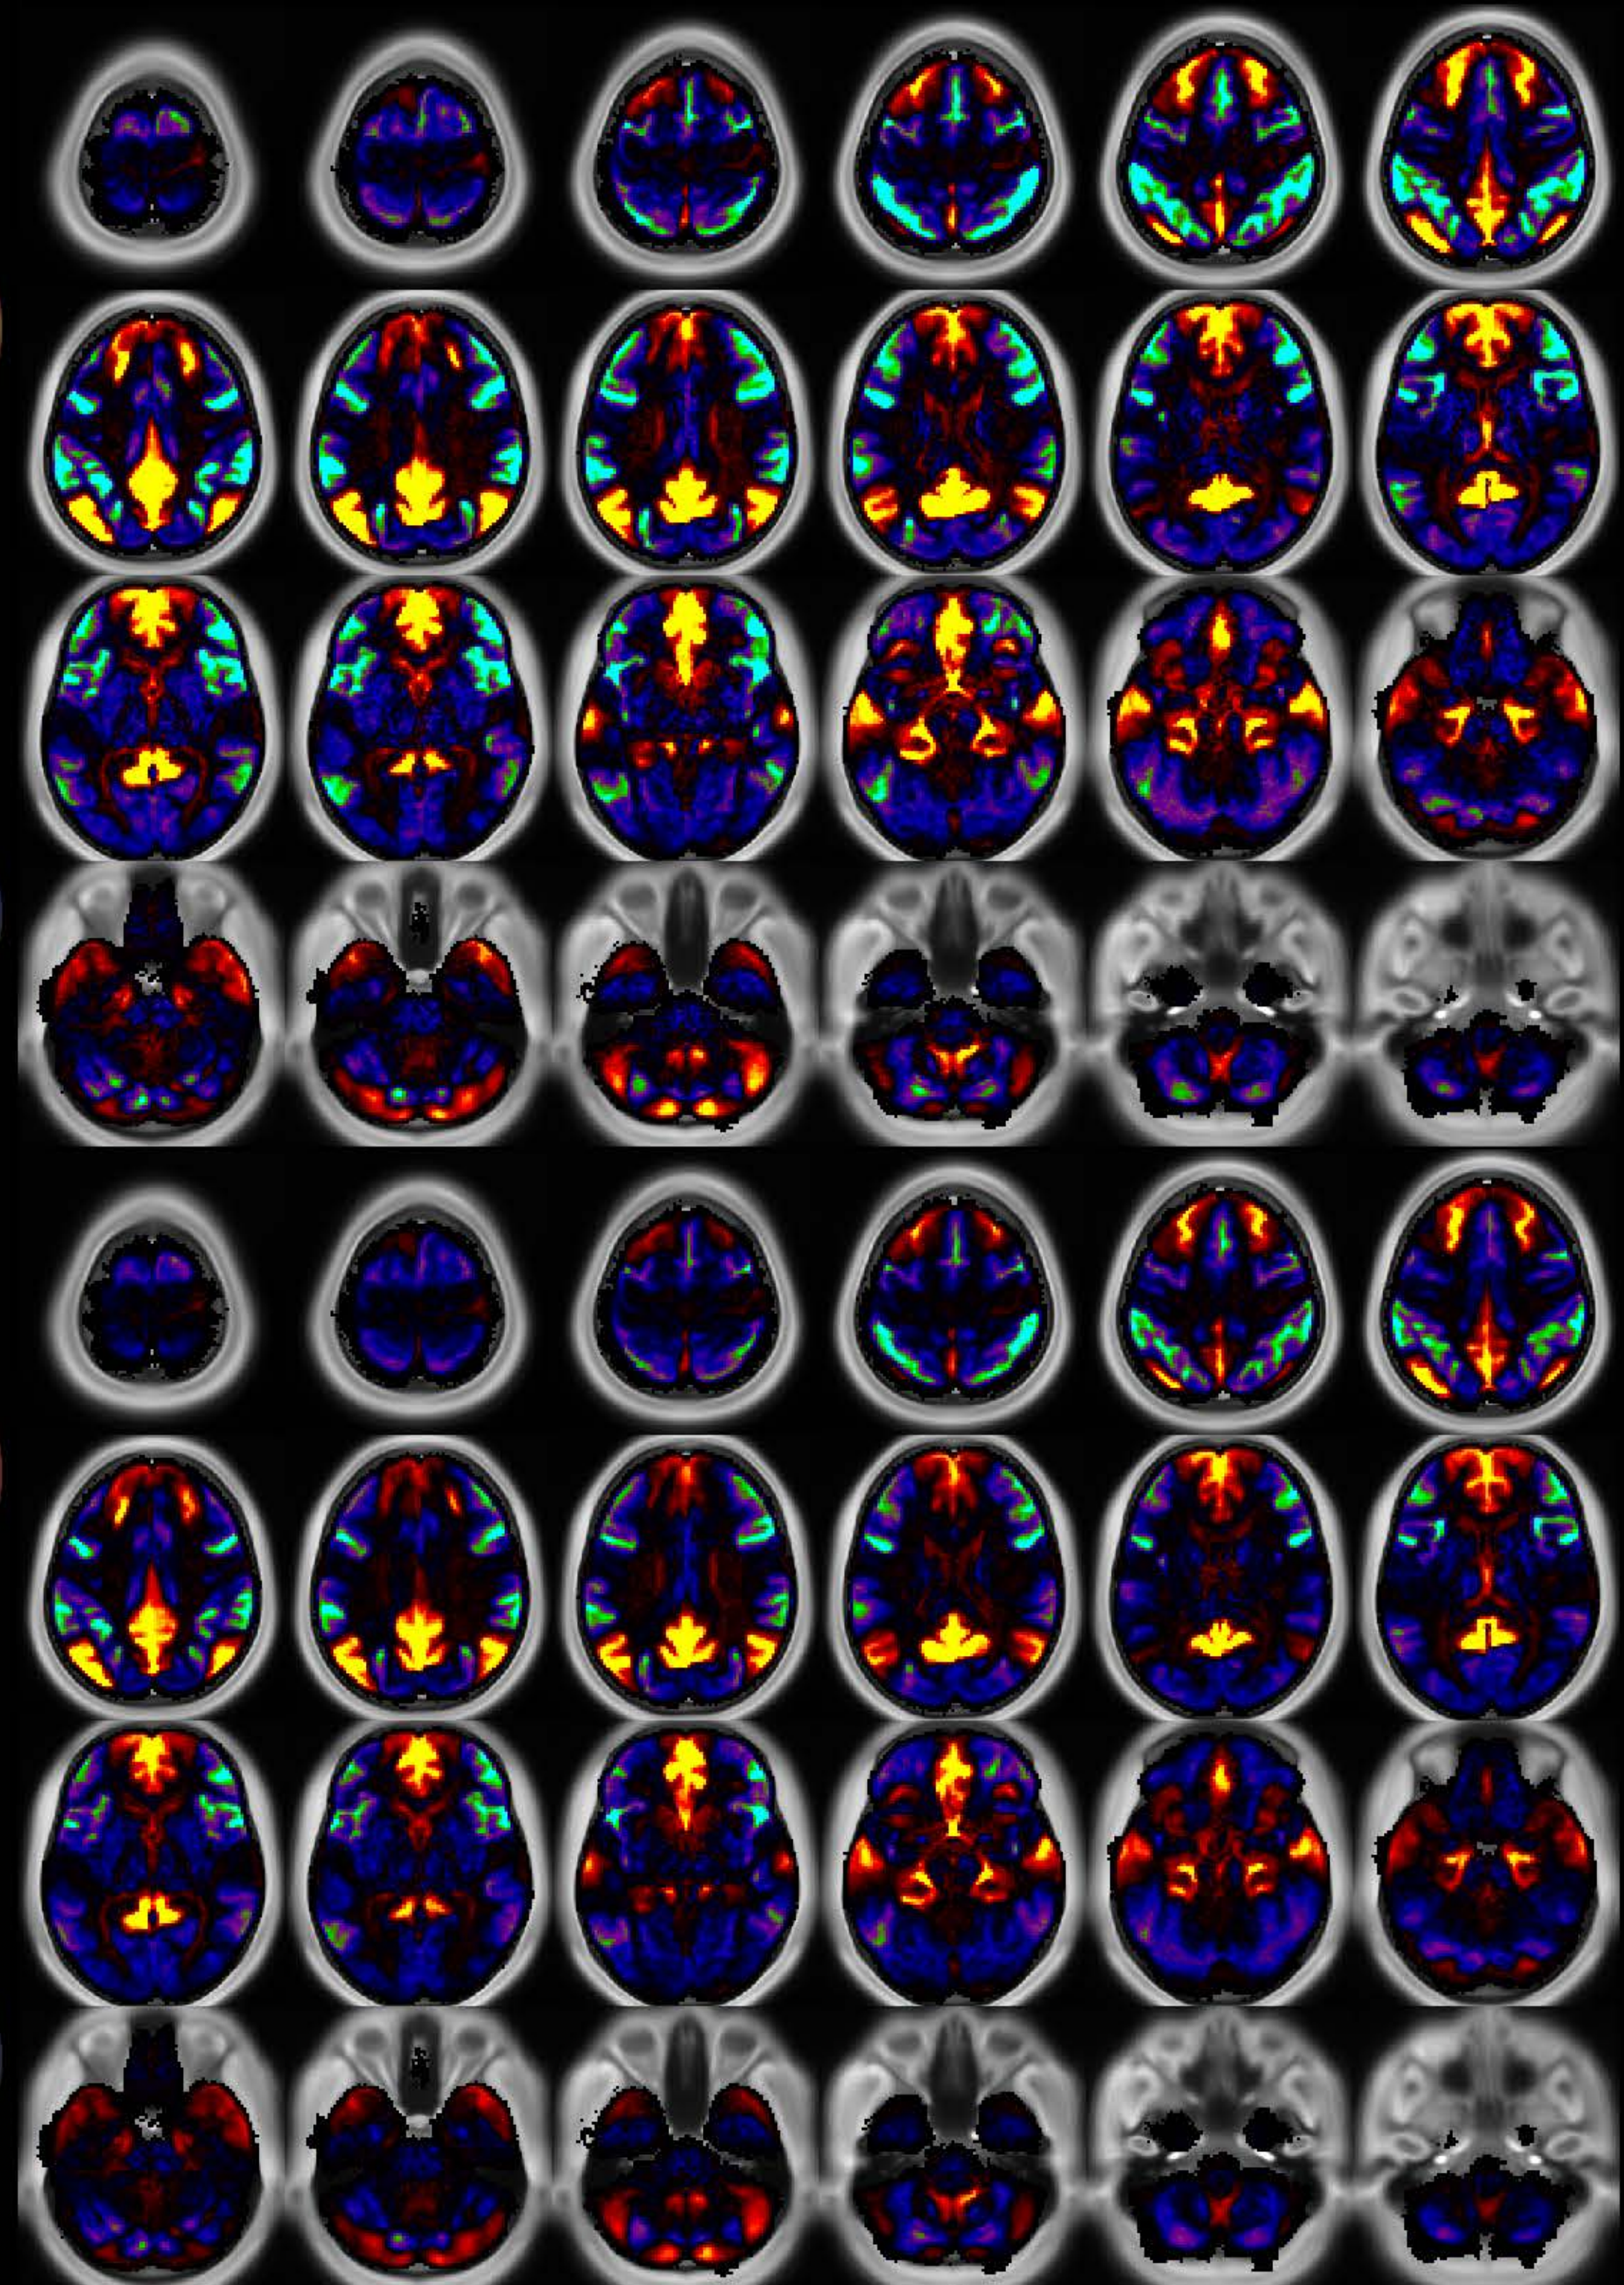

Seconds

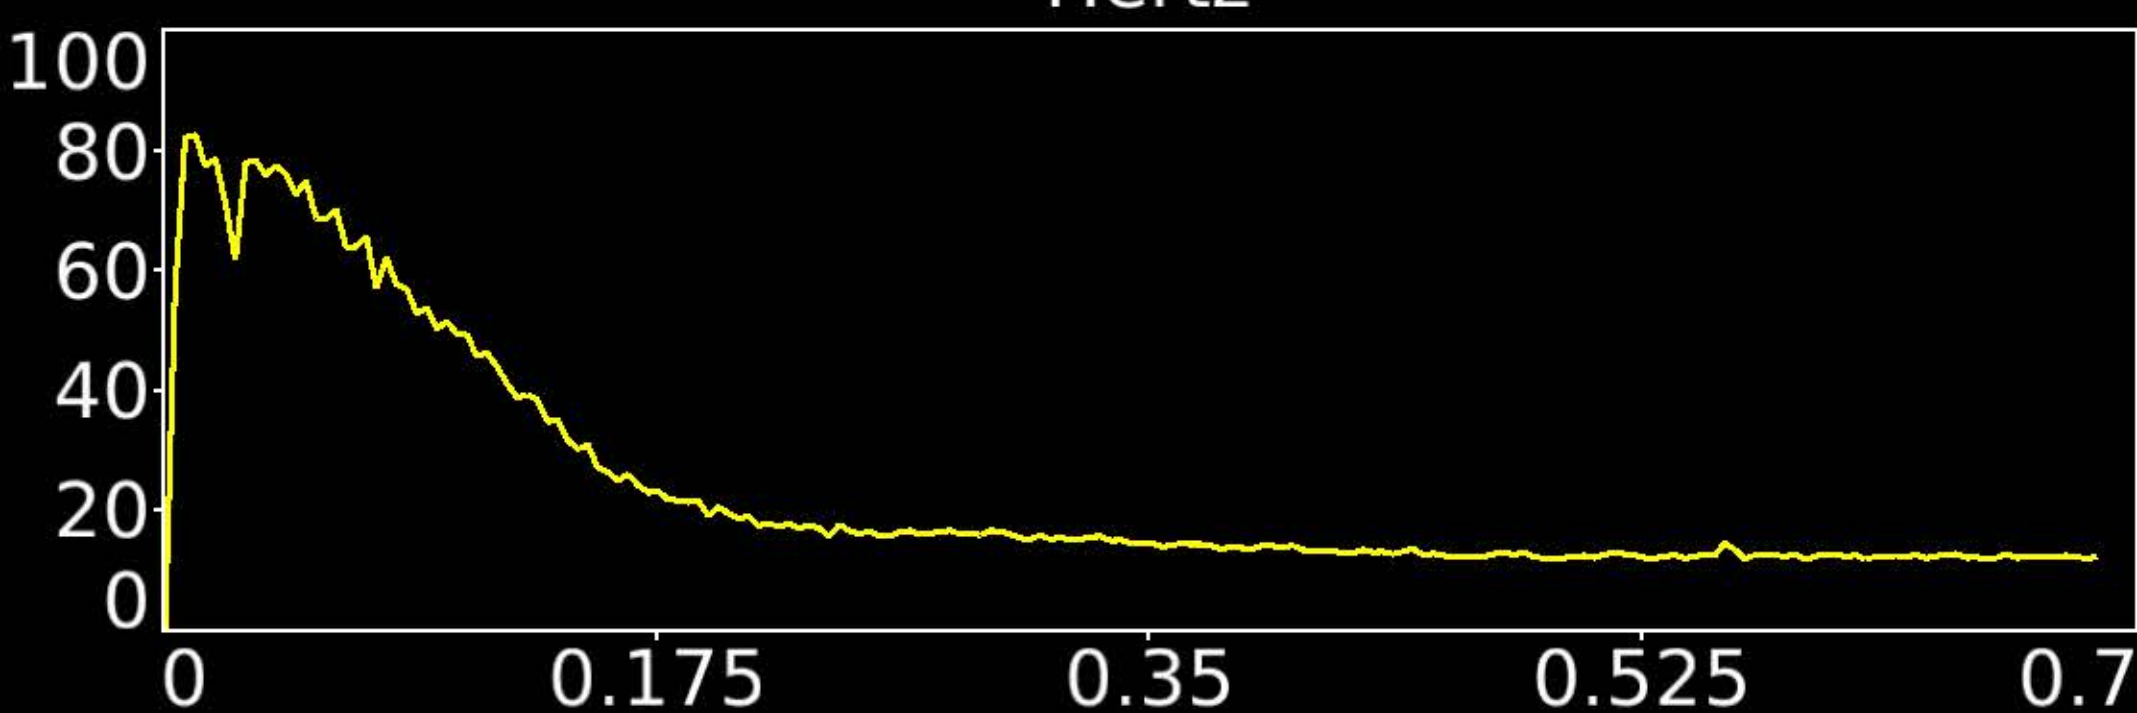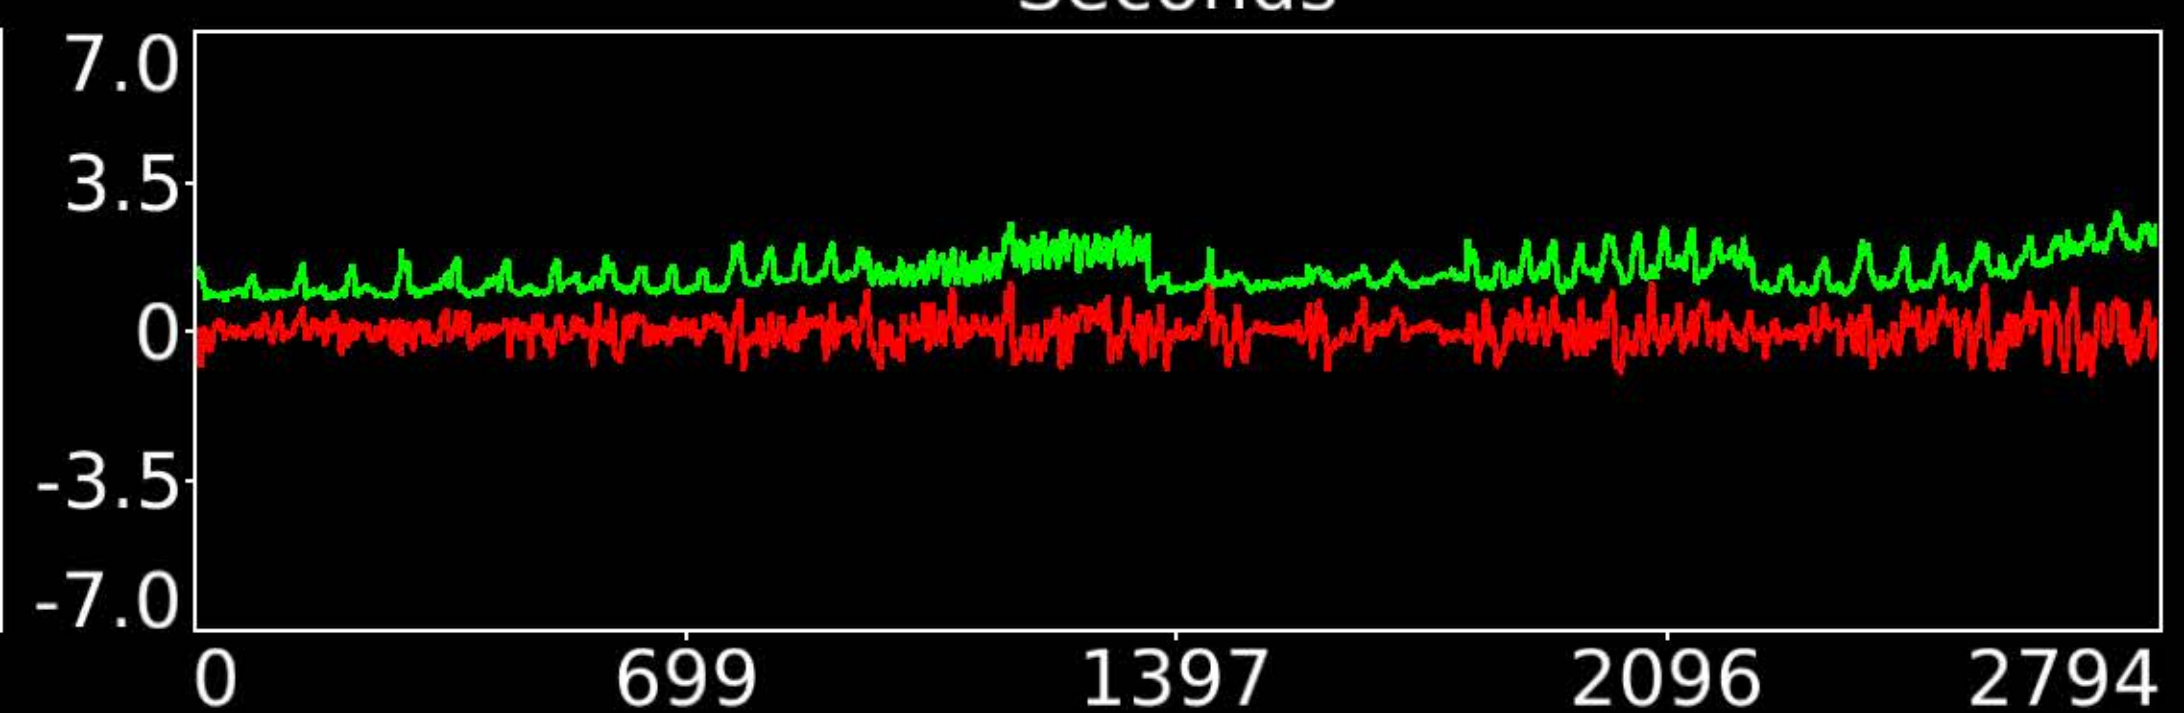

|                                                                                                                   |                           |                             |  |
|-------------------------------------------------------------------------------------------------------------------|---------------------------|-----------------------------|--|
| Number & Class: 2 Signal                                                                                          |                           | Name: Primary Default Mode  |  |
| RVT Correlated: No                                                                                                | DVARS Dip Associated: No  | Cross-Subject Variable: Yes |  |
| Single Subject: No                                                                                                | % Variance Explained: 4.1 | Globality Index: 1.04       |  |
| Task Component: 5                                                                                                 | Rest Component: 10        | Task Modulated: Emotion     |  |
| Rationale: Spatial map includes positive and negative patches that respect known RSNs (e.g. Default Mode Network) |                           |                             |  |



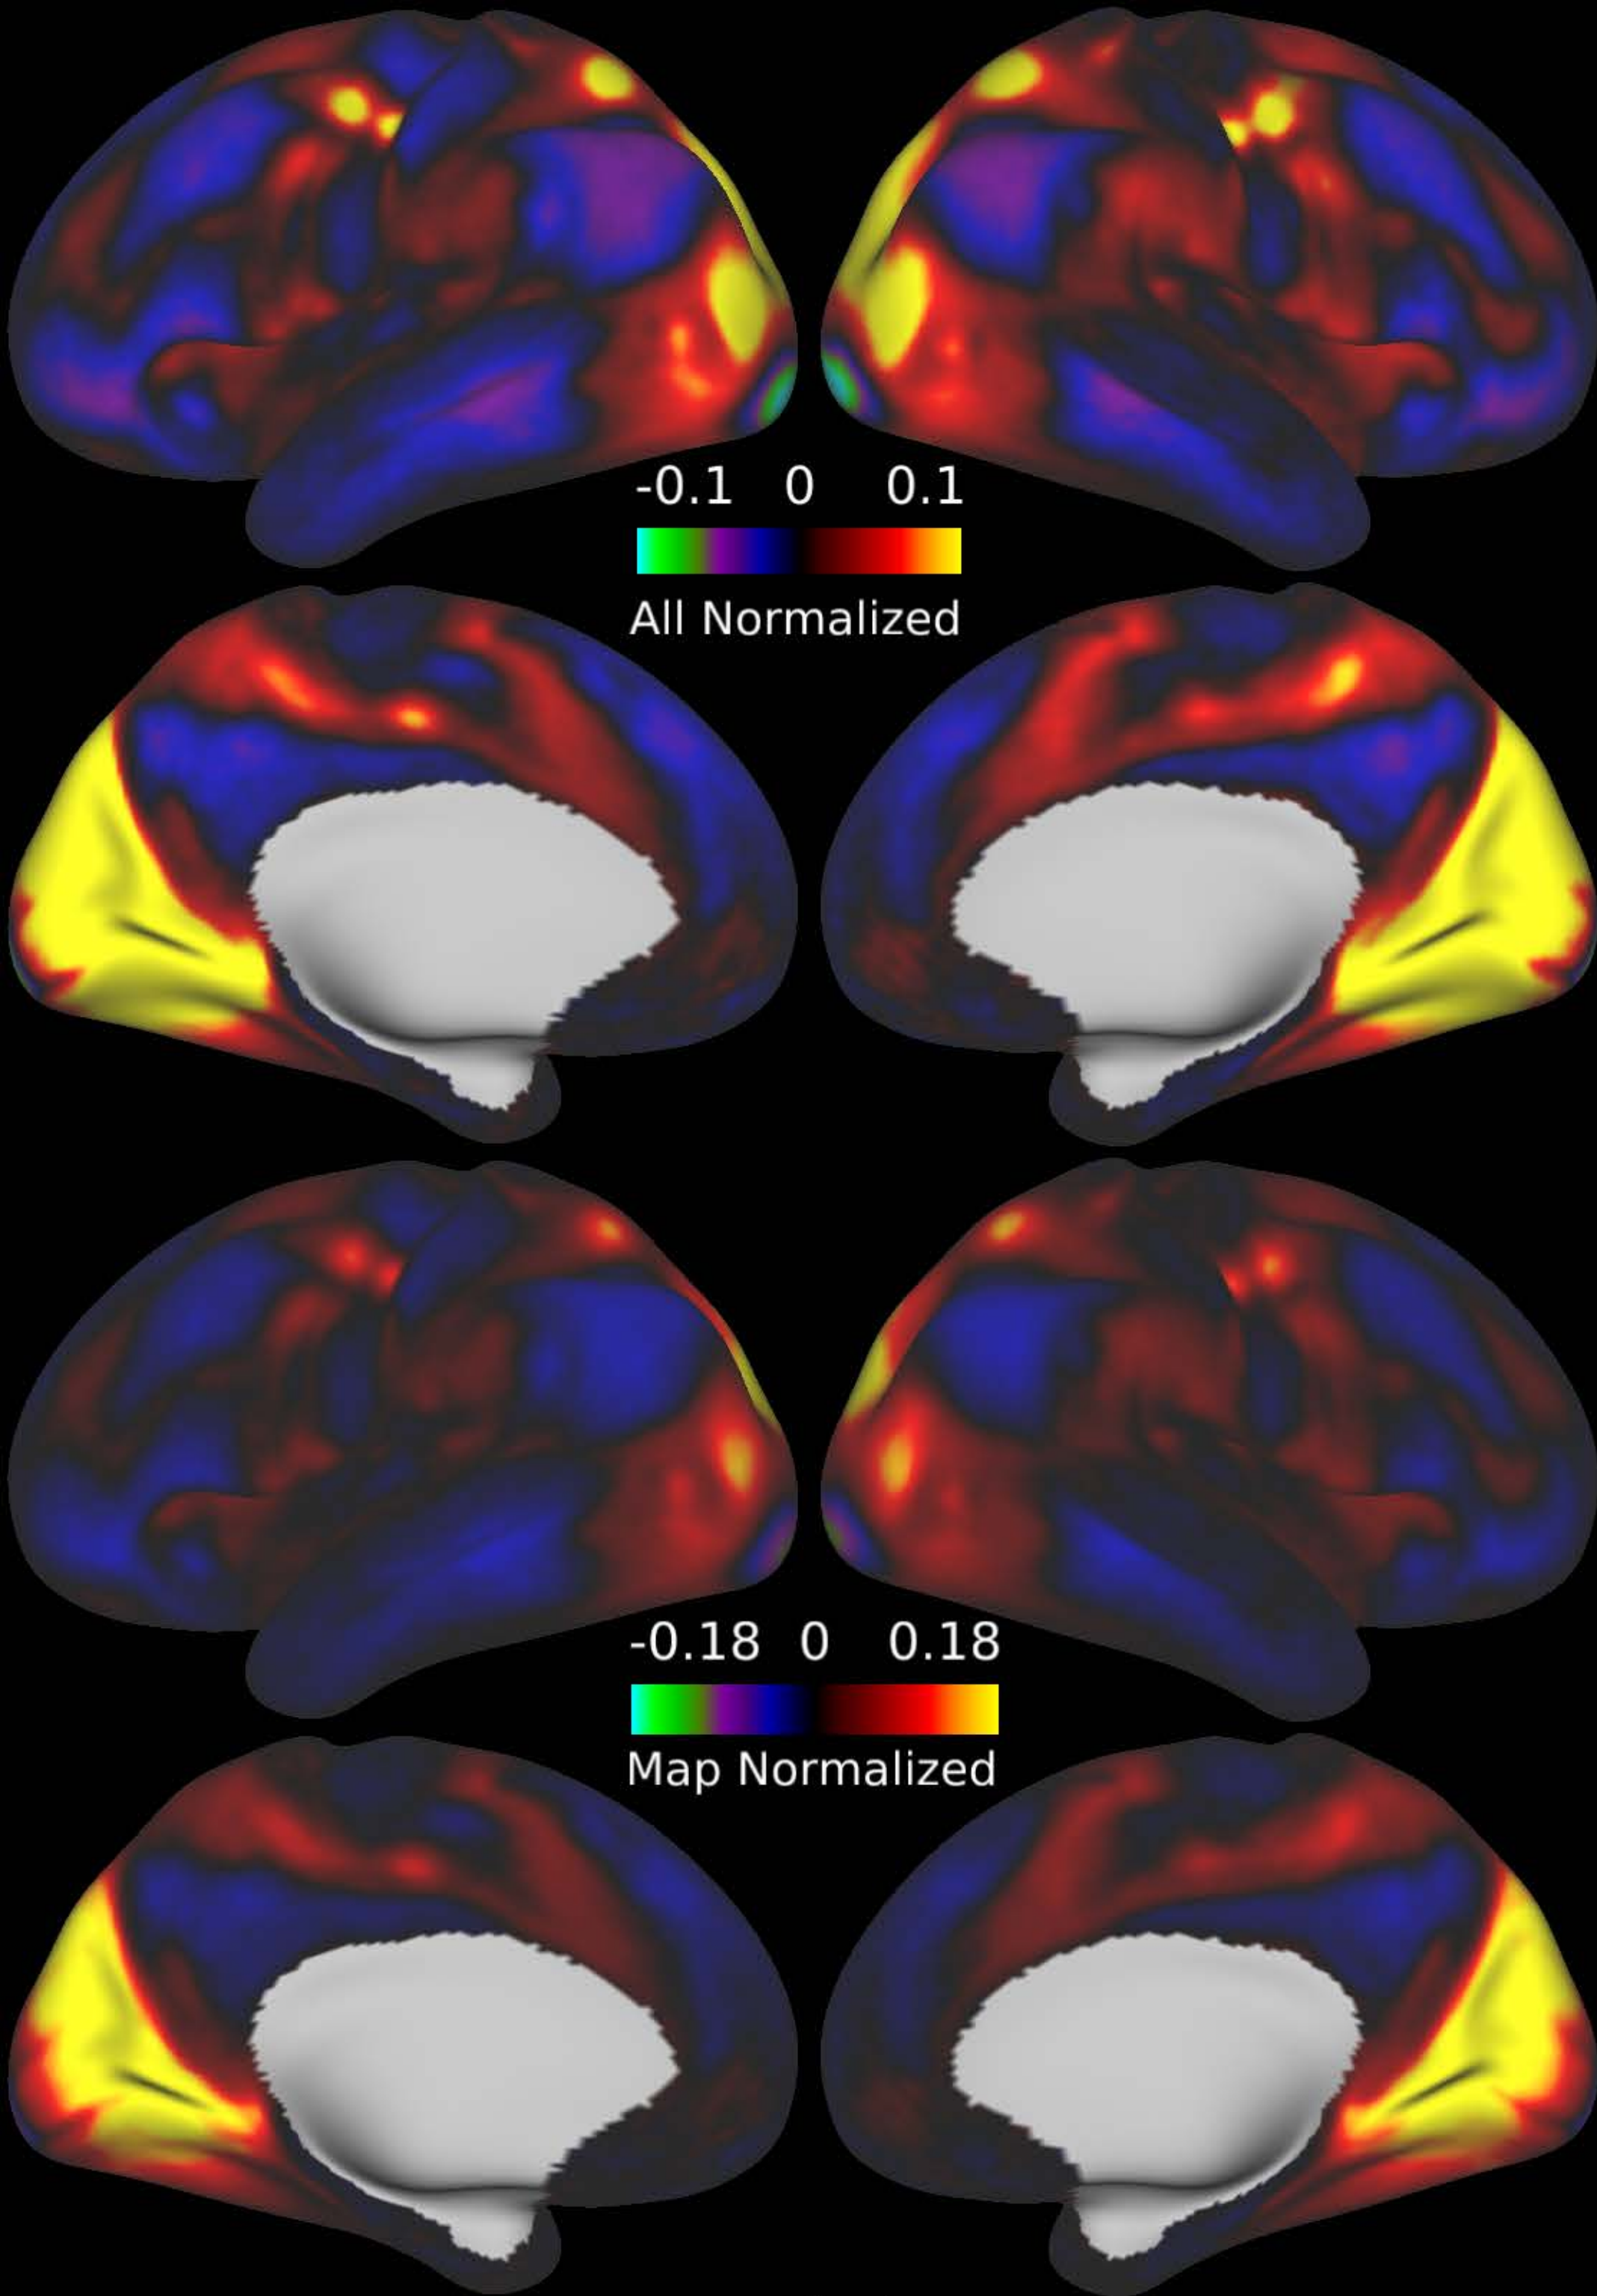

Hertz

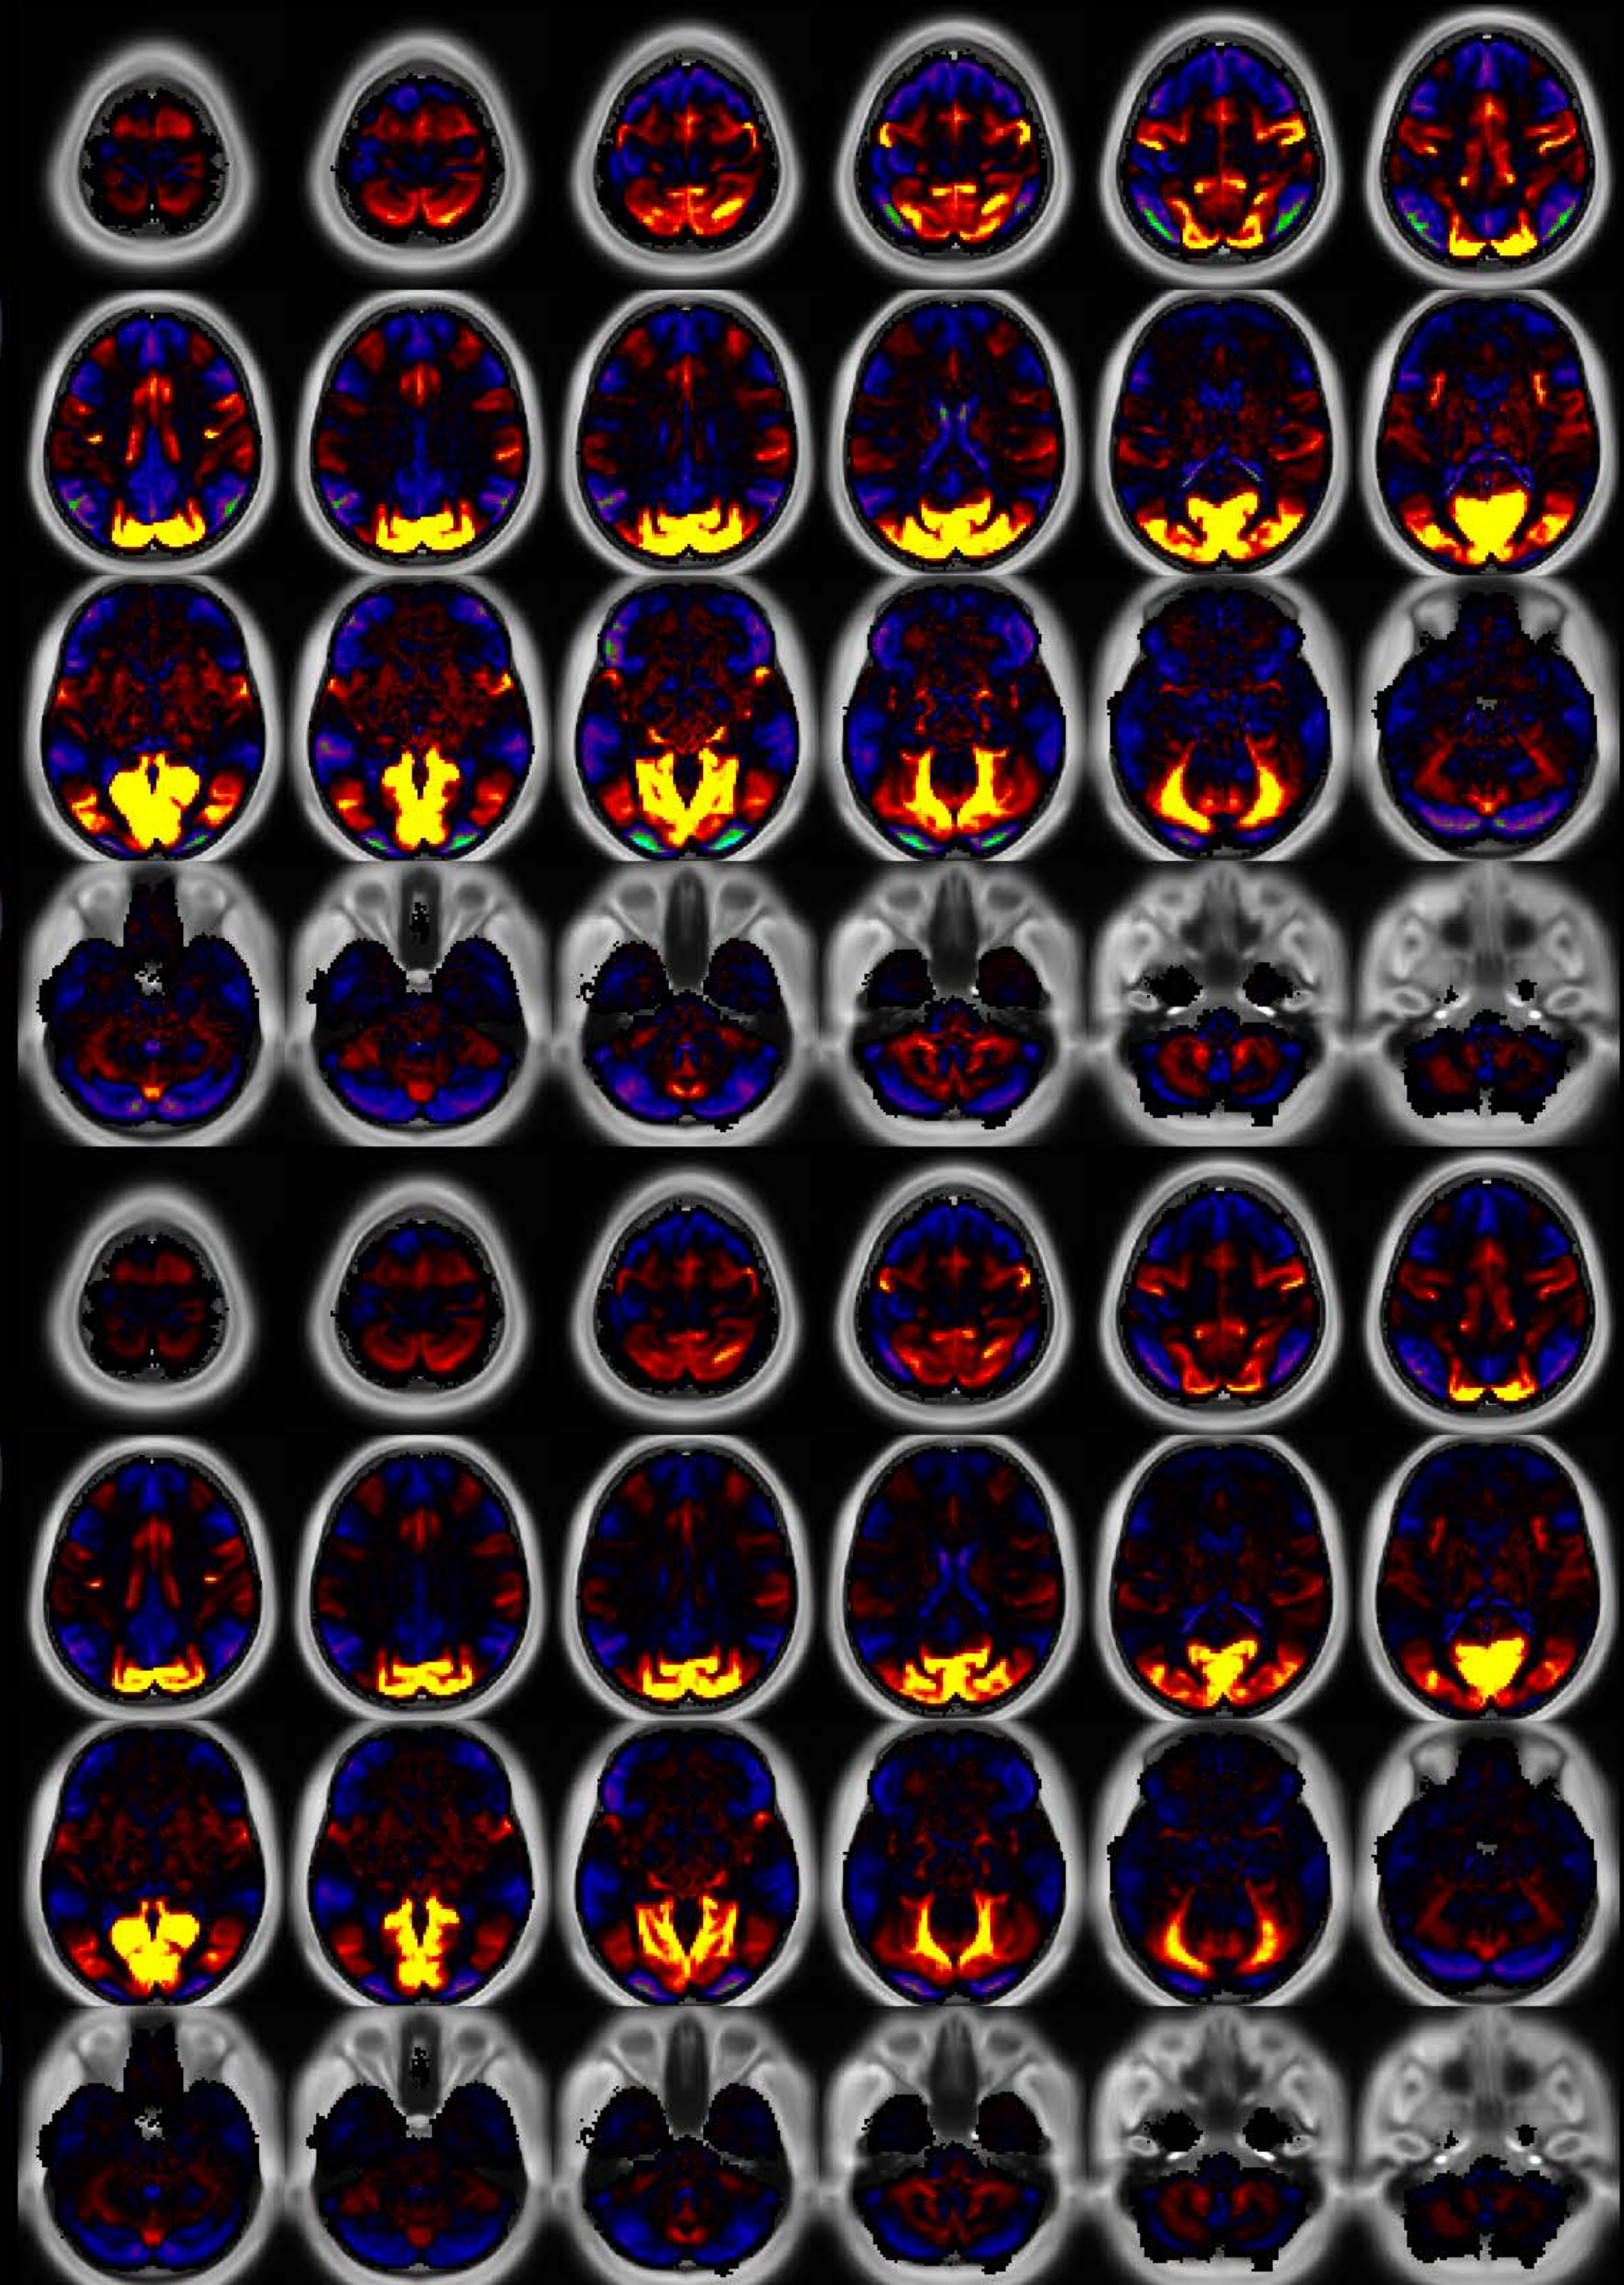

Seconds

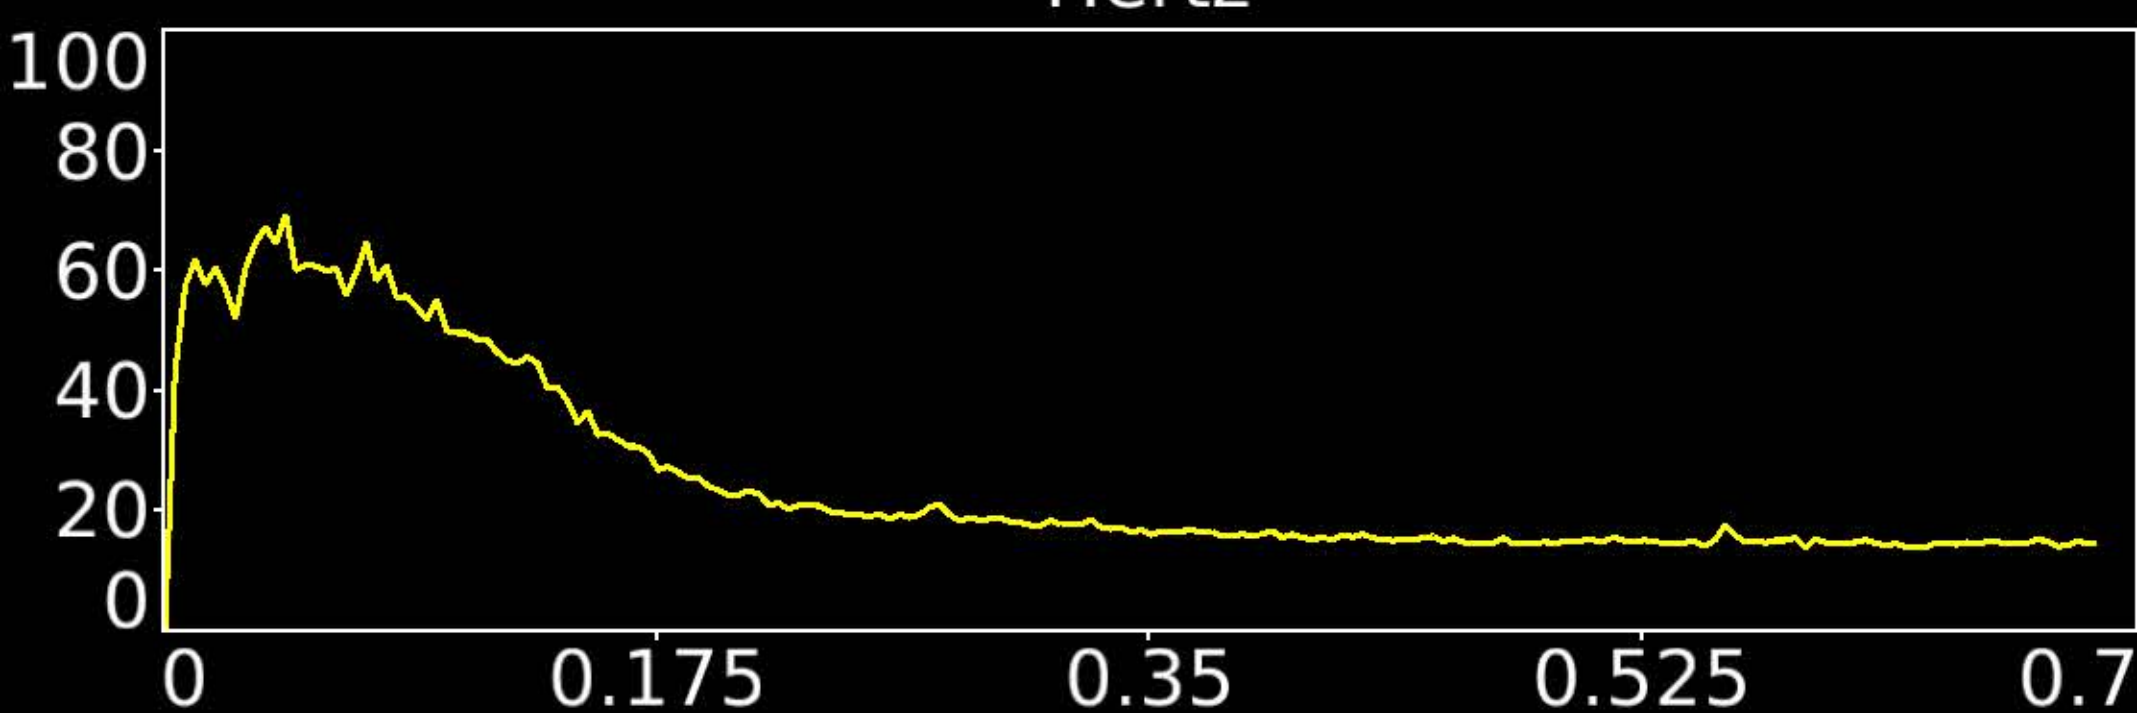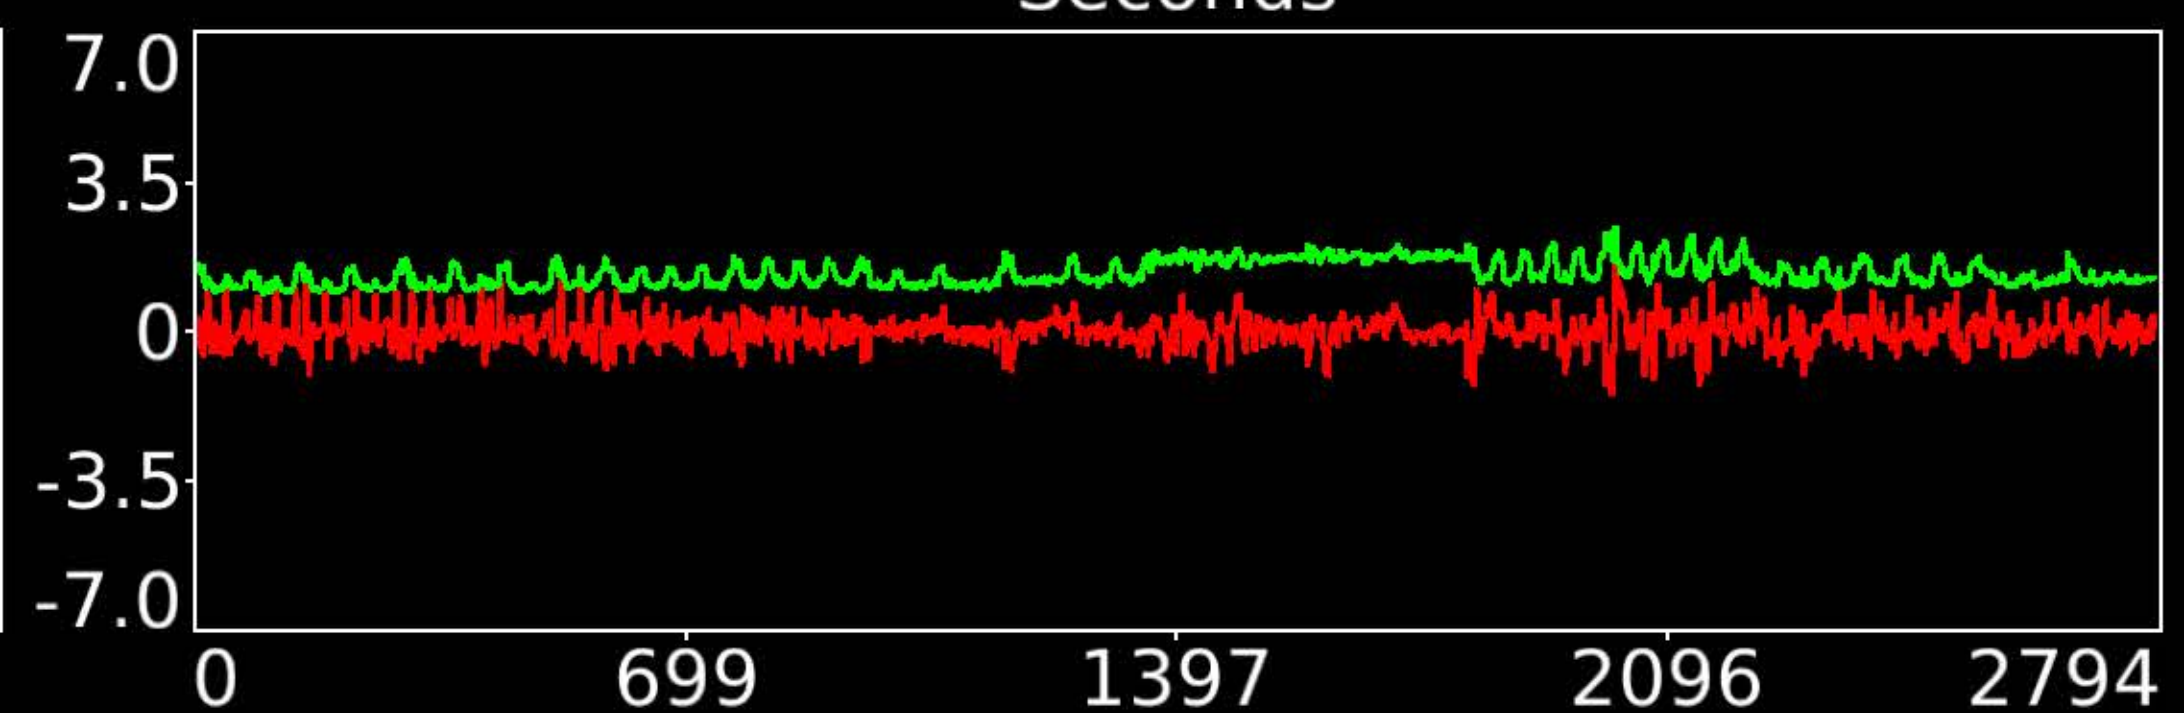

|                          |                            |                                        |  |
|--------------------------|----------------------------|----------------------------------------|--|
| Number & Class: 3 Signal |                            | Name: Pan-Visual (Peripheral > Foveal) |  |
| RVT Correlated: No       | DVARS Dip Associated: No   | Cross-Subject Variable: Yes            |  |
| Single Subject: No       | % Variance Explained: 3.82 | Globality Index: 0.4                   |  |
| Task Component: 15       | Rest Component: 4          | Task Modulated: Language               |  |

Rationale: Spatial map includes positive and negative patches that respect known retinotopic visual organization (Peripheral vs Foveal)



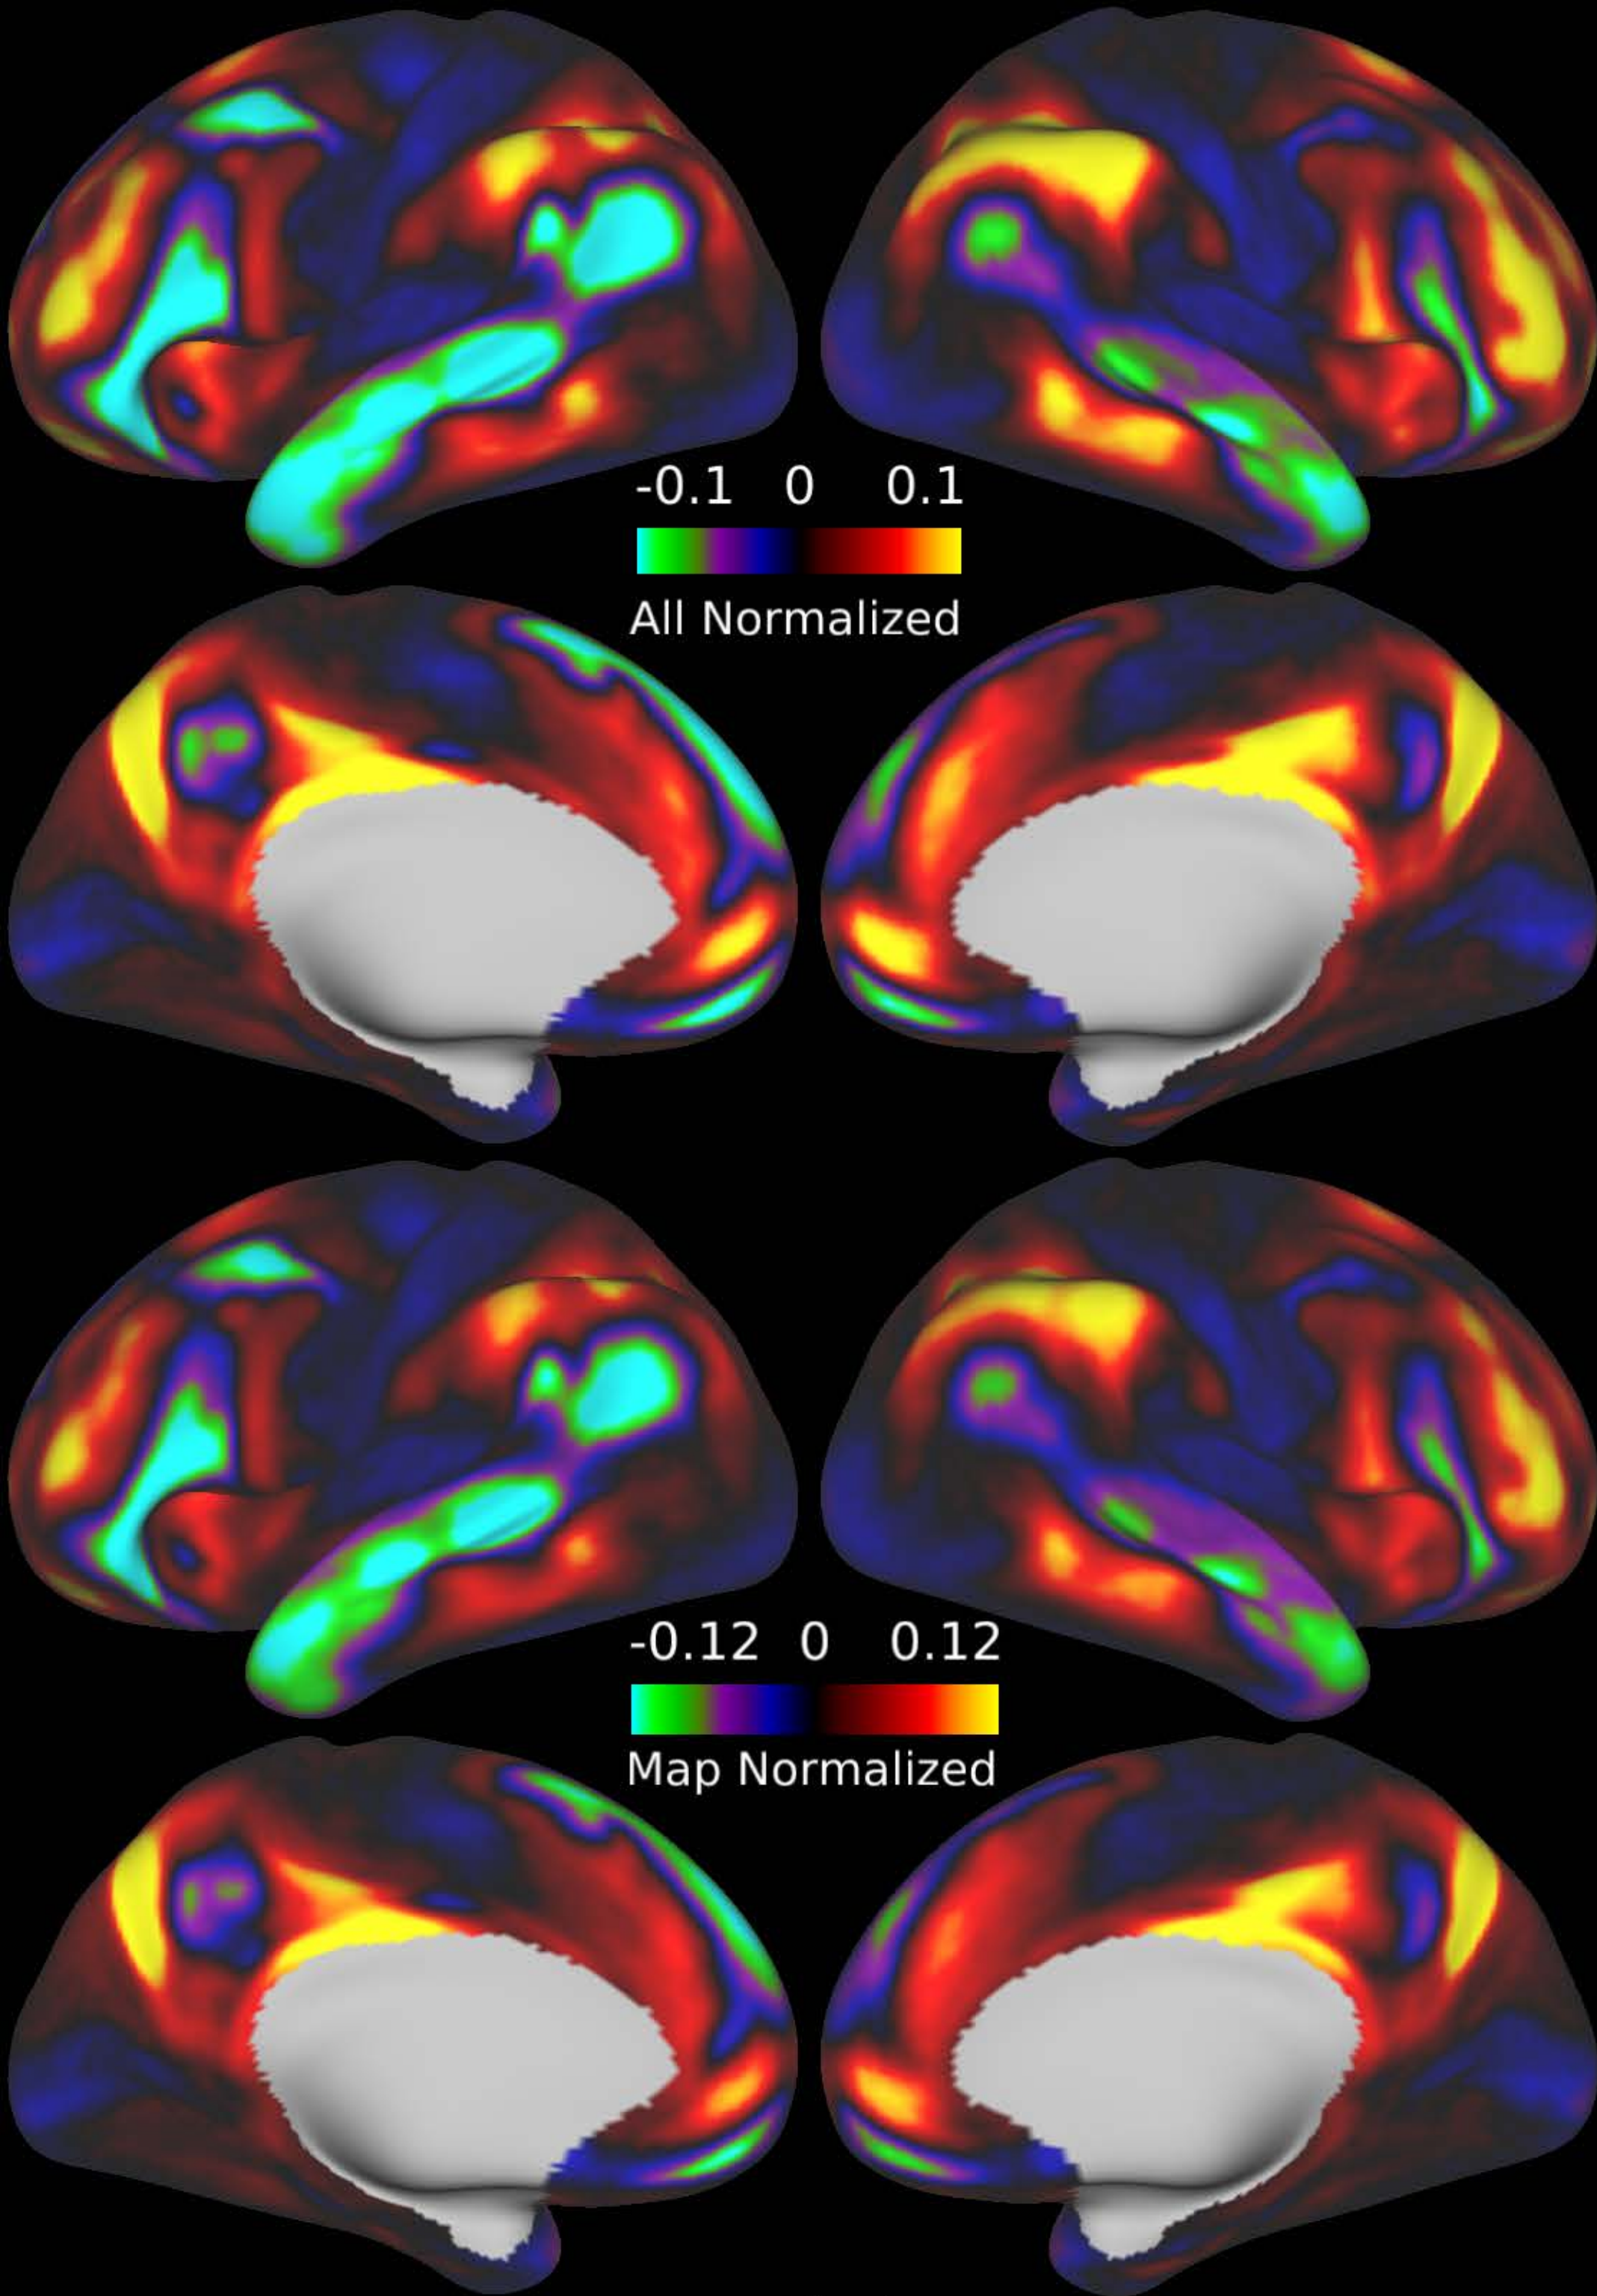

Hertz

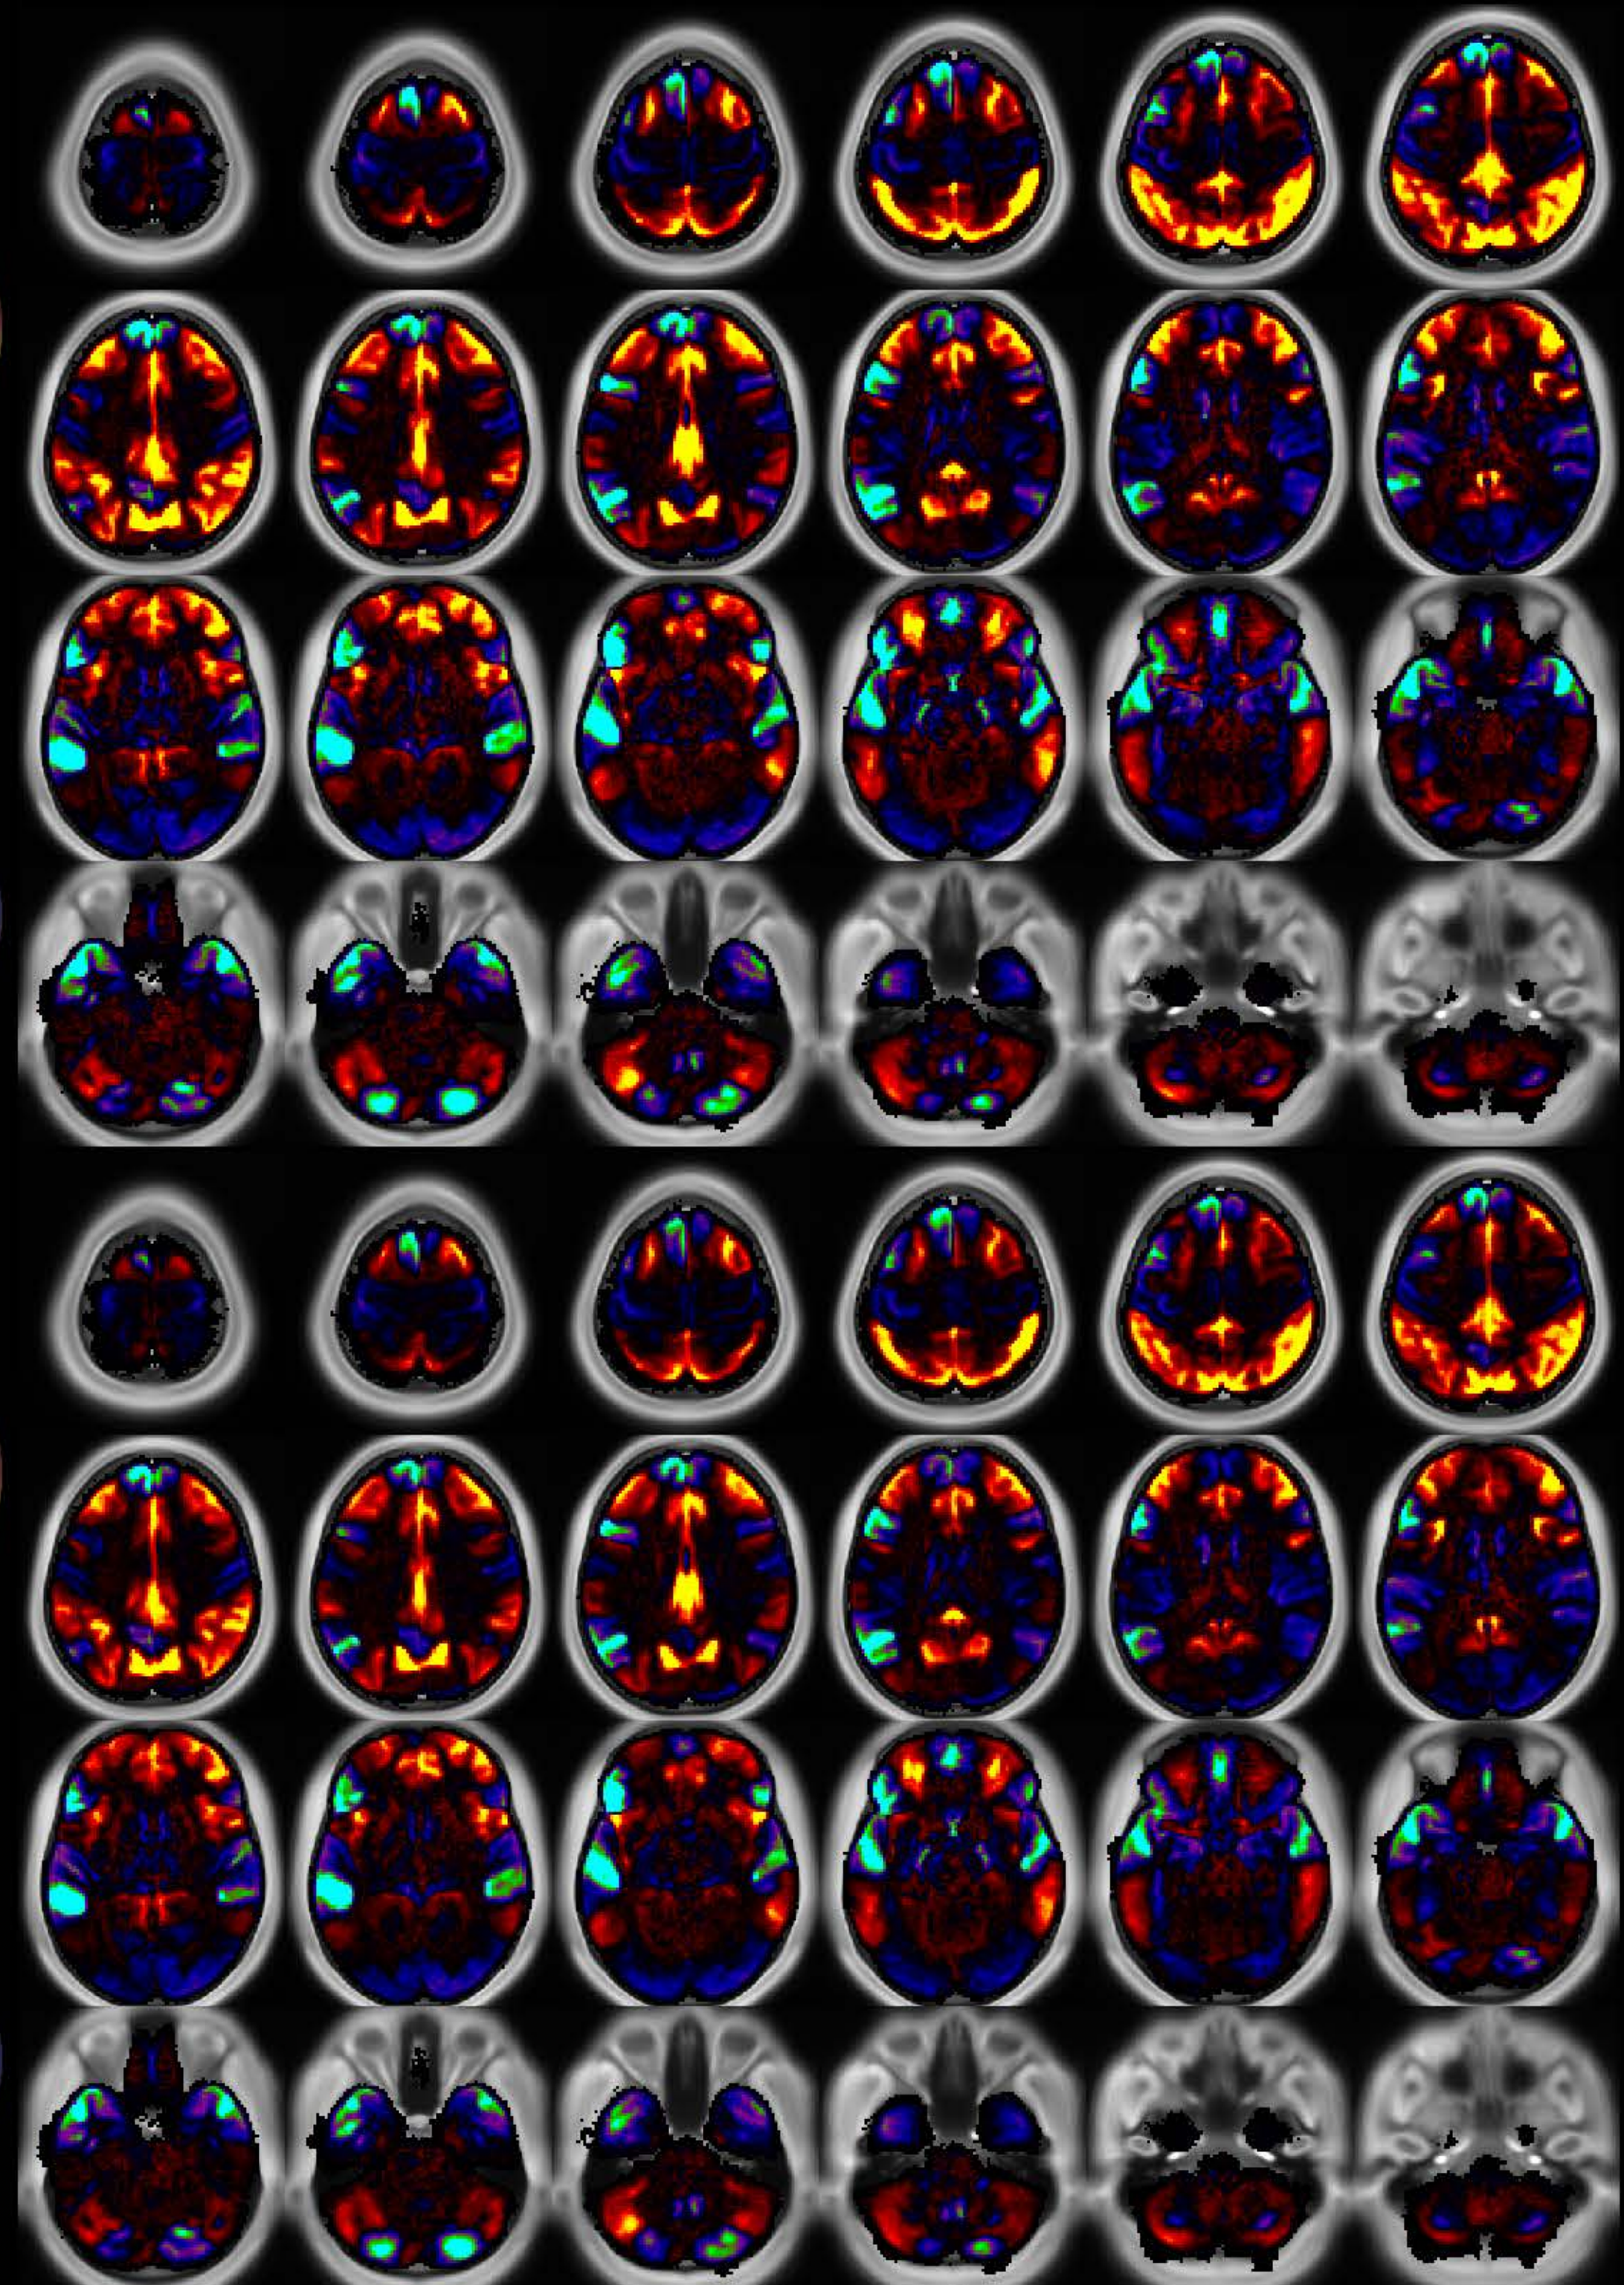

Seconds

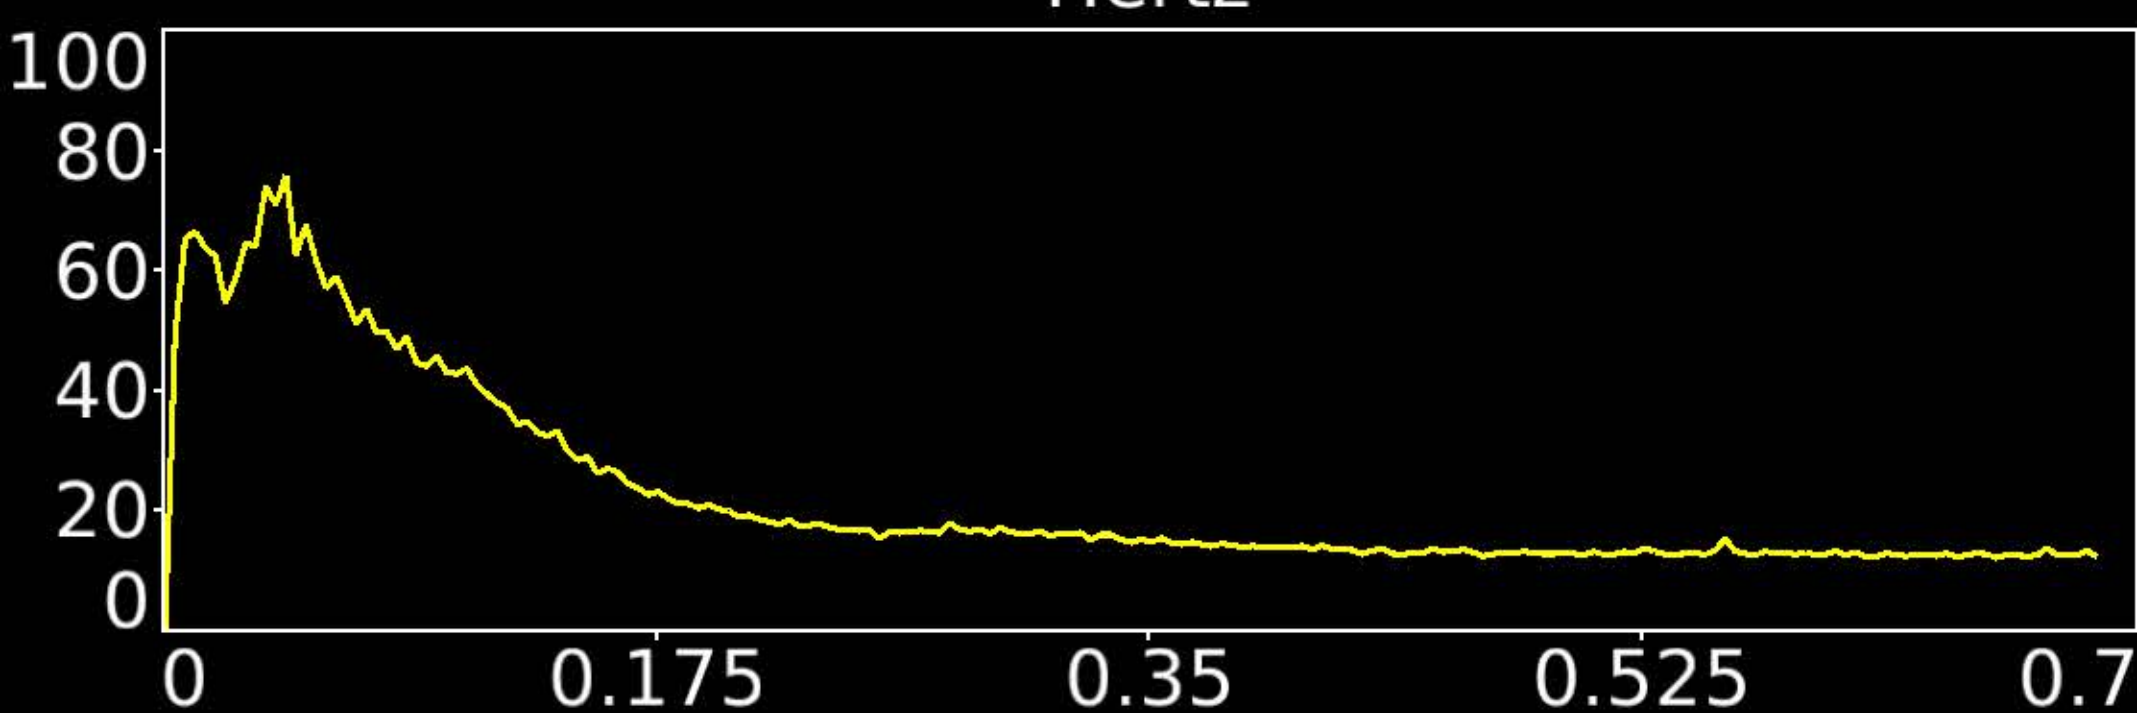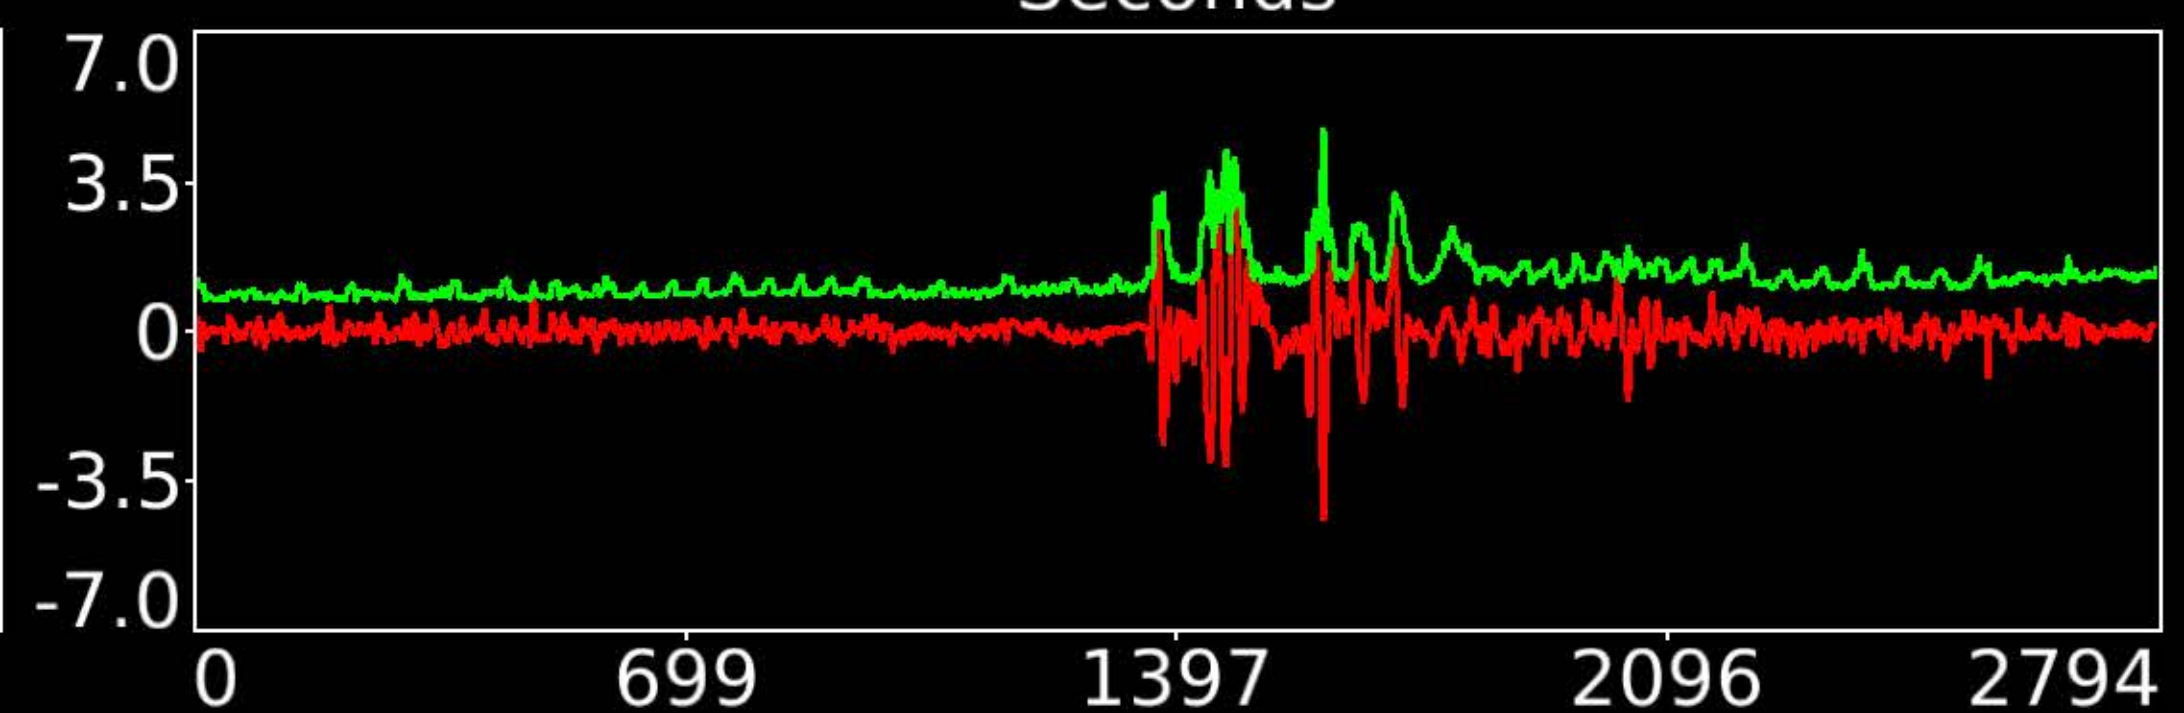

|                          |                            |                            |
|--------------------------|----------------------------|----------------------------|
| Number & Class: 4 Signal | Name: Language Task Story  |                            |
| RVT Correlated: No       | DVARS Dip Associated: No   | Cross-Subject Variable: No |
| Single Subject: No       | % Variance Explained: 3.23 | Globality Index: 0.41      |
| Task Component: -11      | Rest Component: No         | Task Modulated: Language   |

Rationale: Spatial map includes positive and negative patches that are correlated with a specific task design



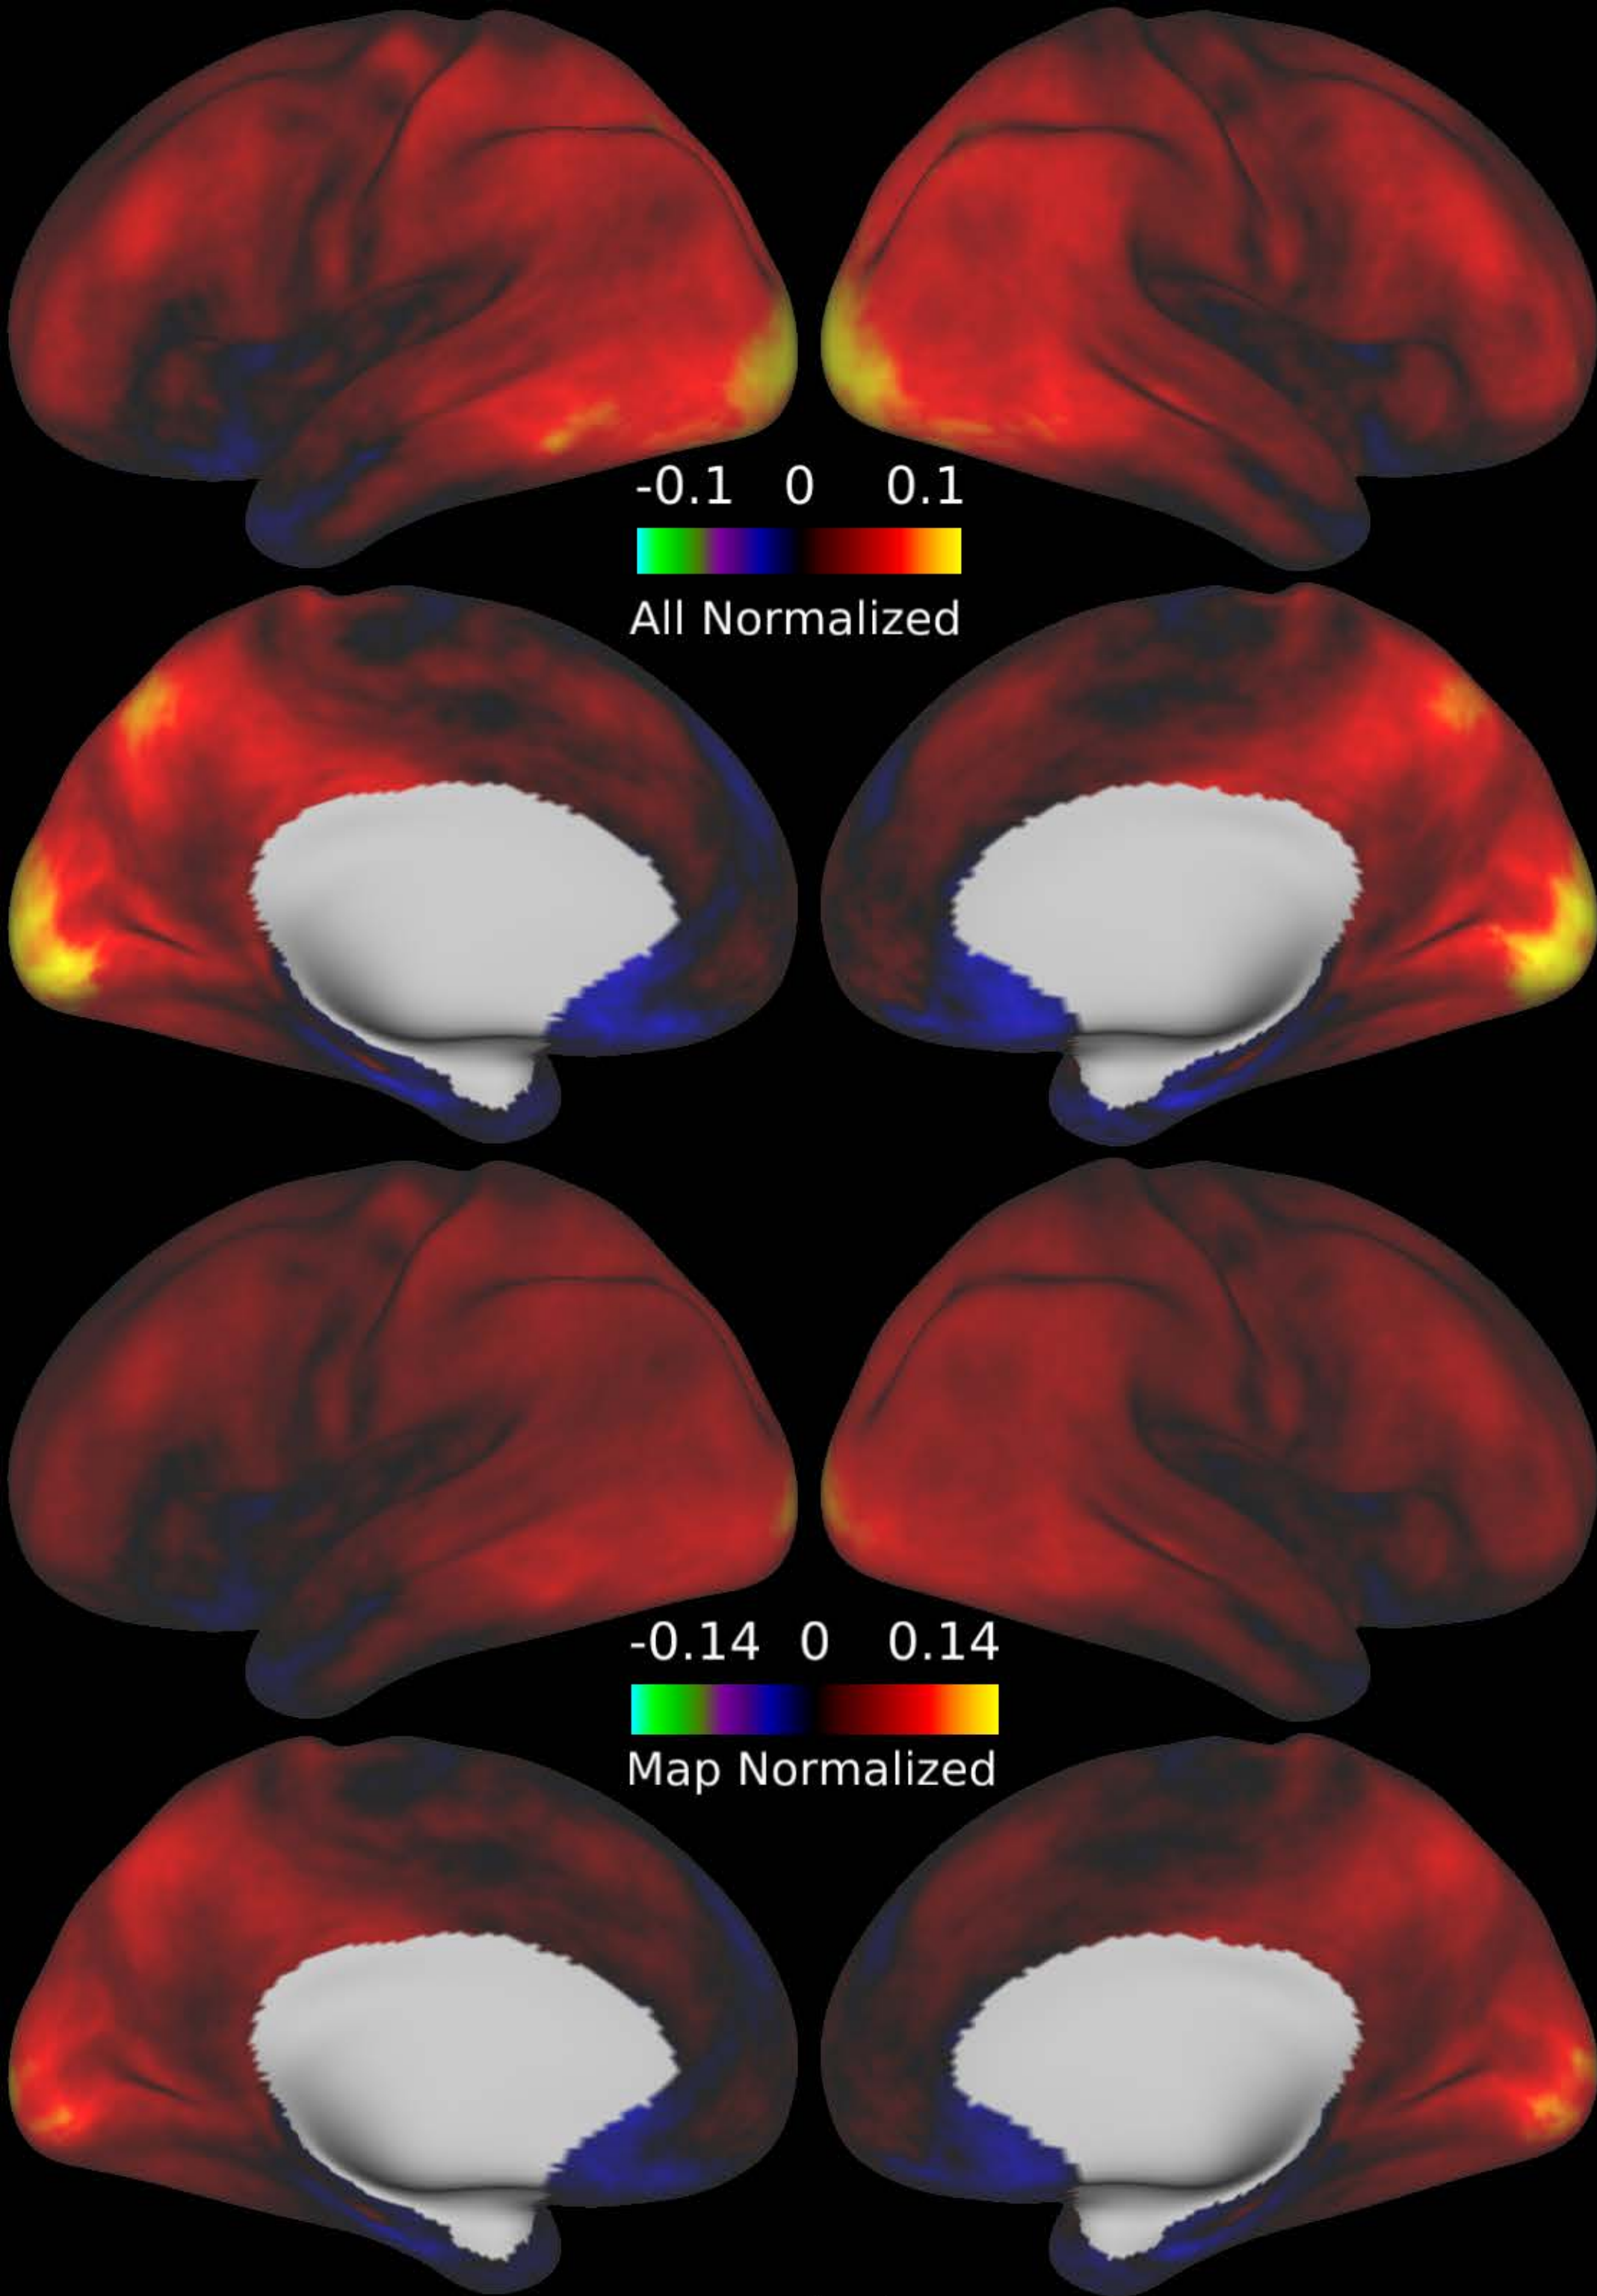

Hertz

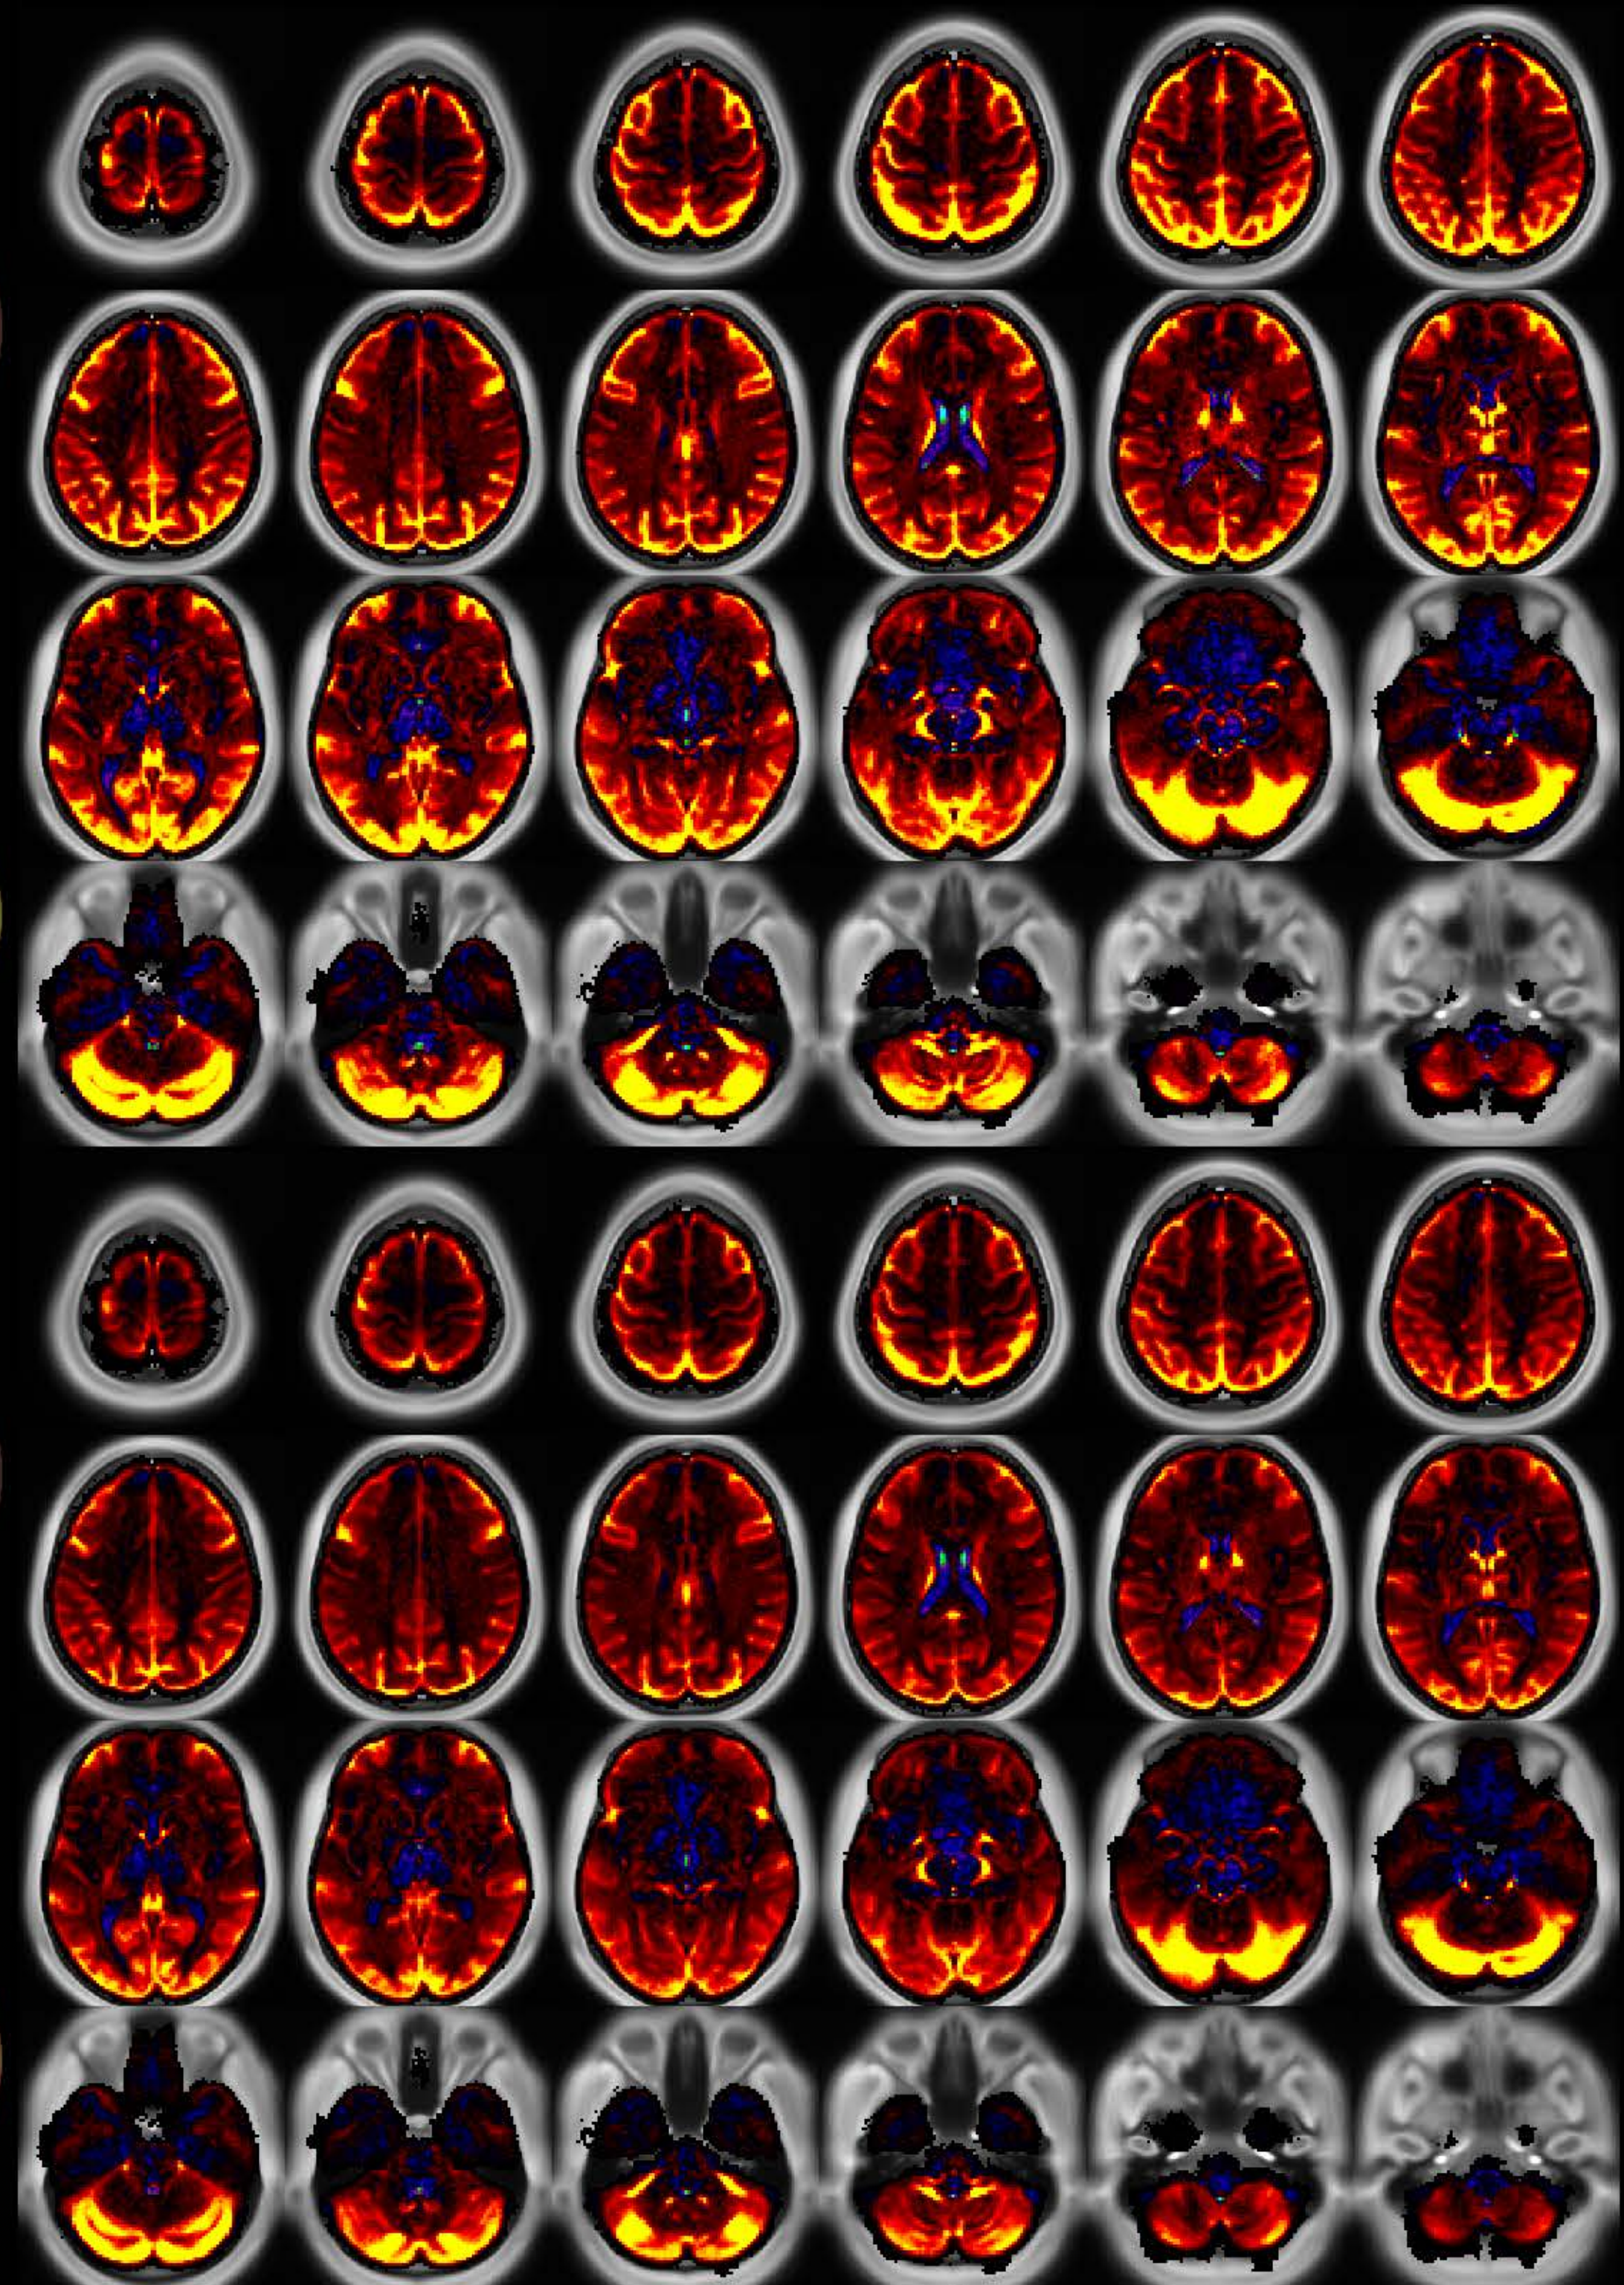

Seconds

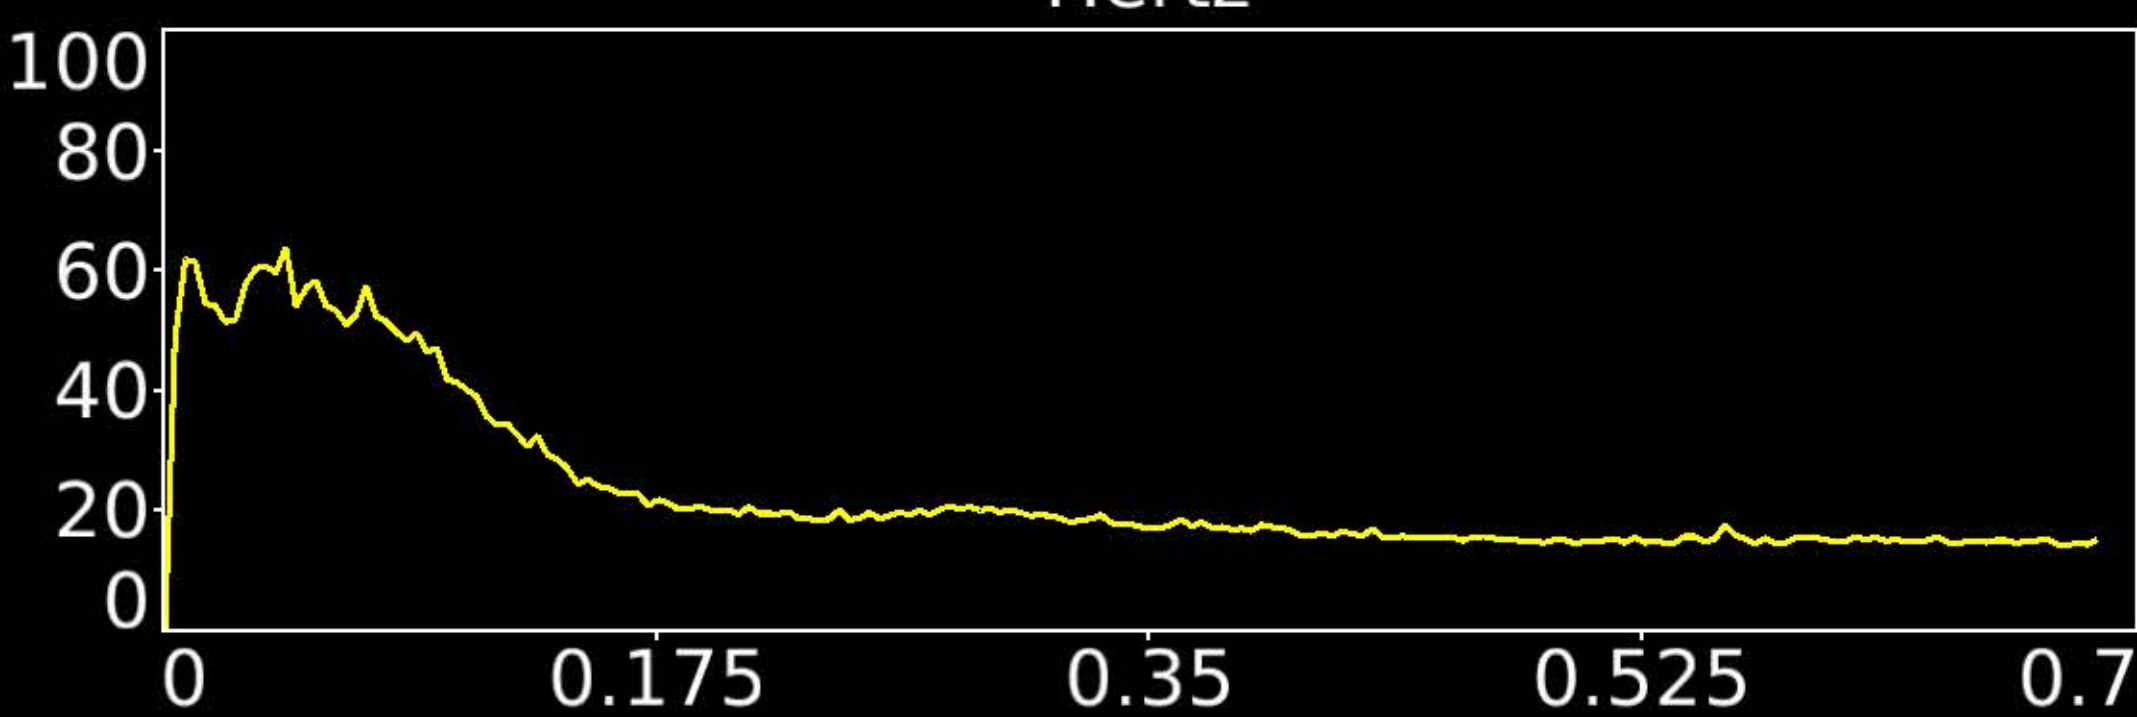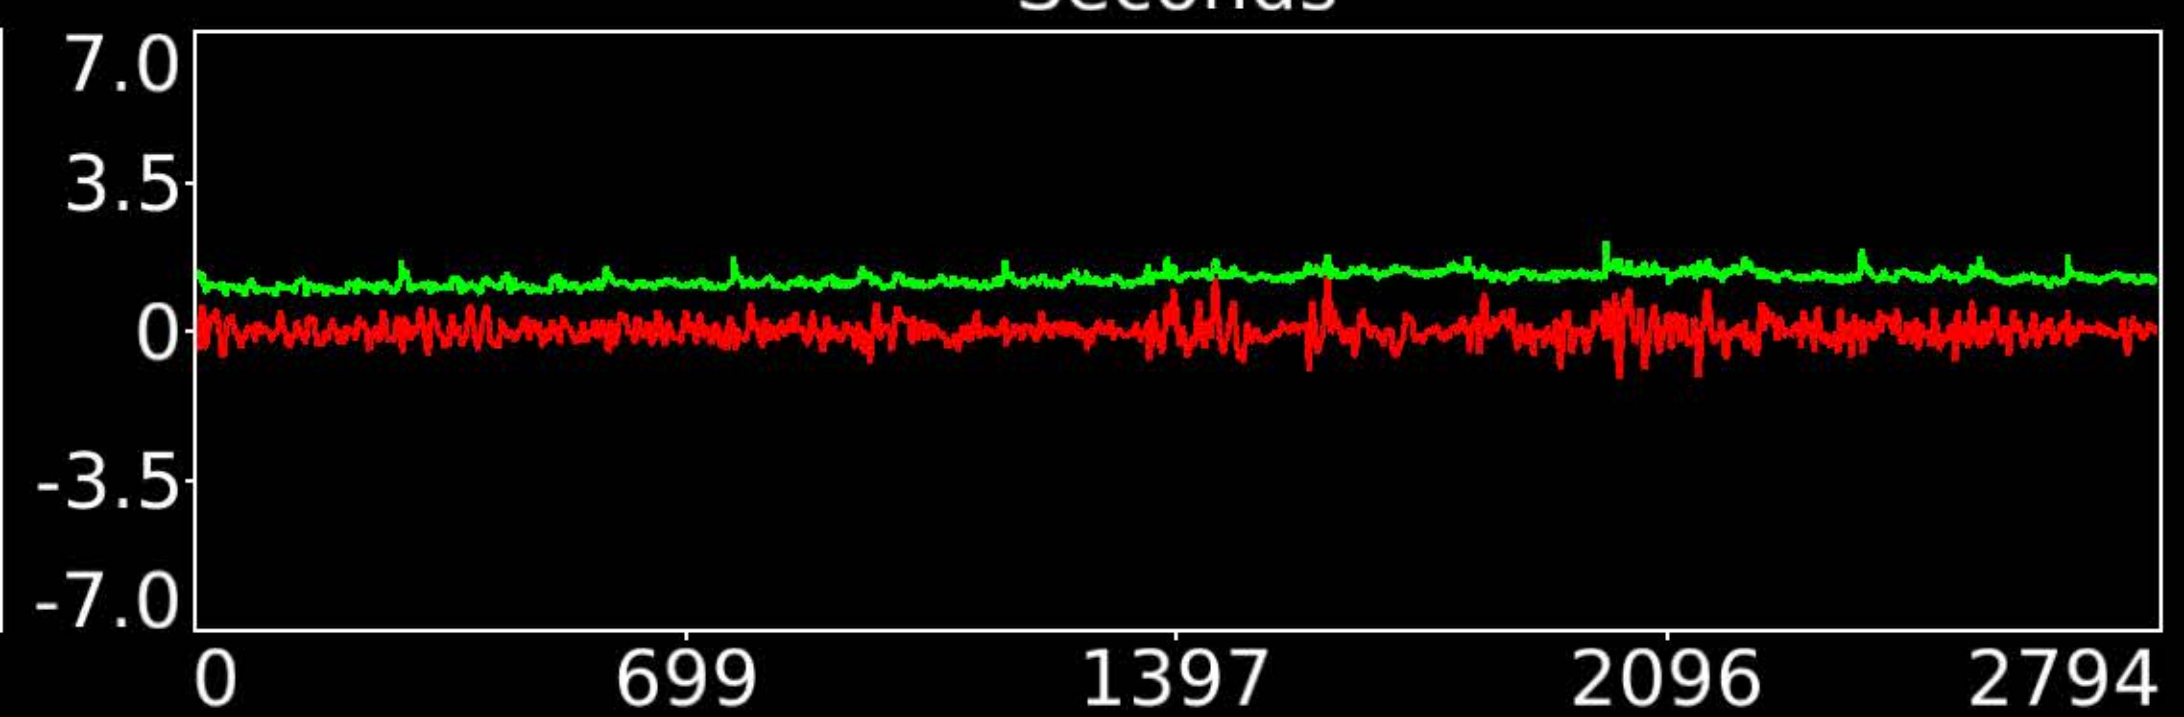

|                                                                            |                            |                               |  |
|----------------------------------------------------------------------------|----------------------------|-------------------------------|--|
| Number & Class: 5 Noise                                                    |                            | Name: Veins + WM + Cerebellum |  |
| RVT Correlated: No                                                         | DVARS Dip Associated: Yes  | Cross-Subject Variable: Yes   |  |
| Single Subject: Yes                                                        | % Variance Explained: 2.83 | Globality Index: 2.61         |  |
| Task Component: 8                                                          | Rest Component: 19+28      | Task Modulated: No            |  |
| Rationale: Spatial map contains substantial white matter and venous signal |                            |                               |  |



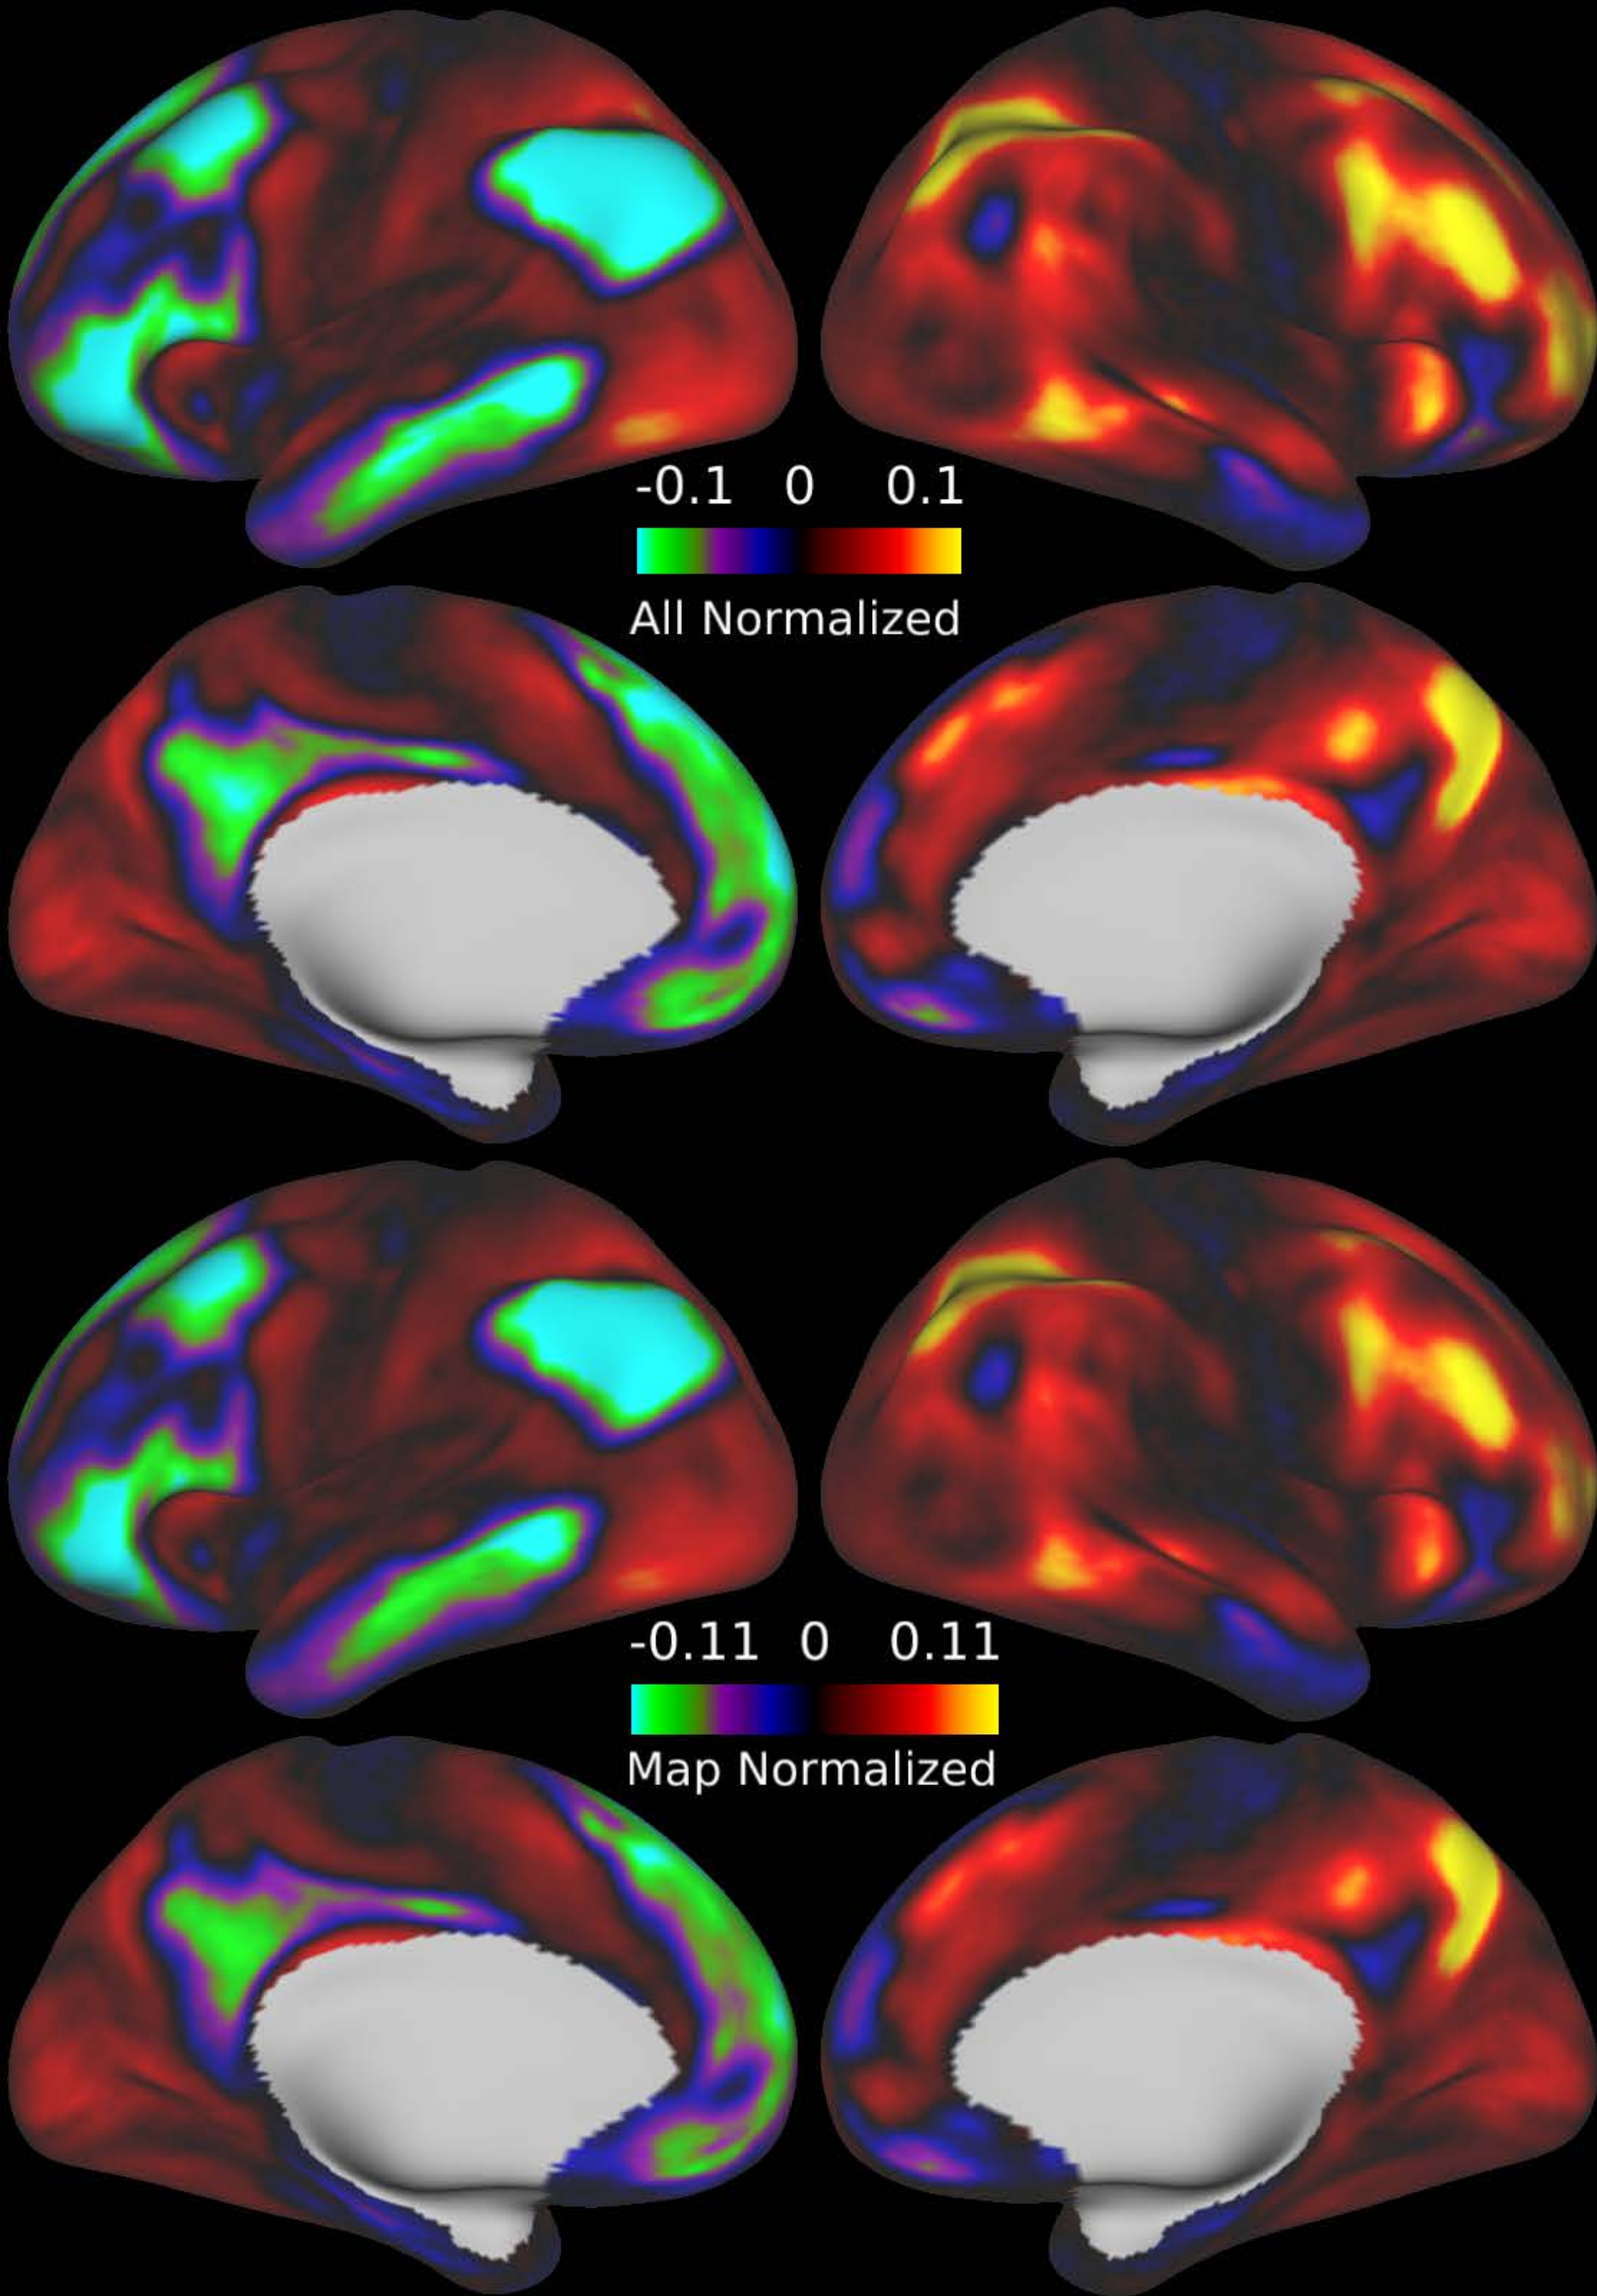

Hertz

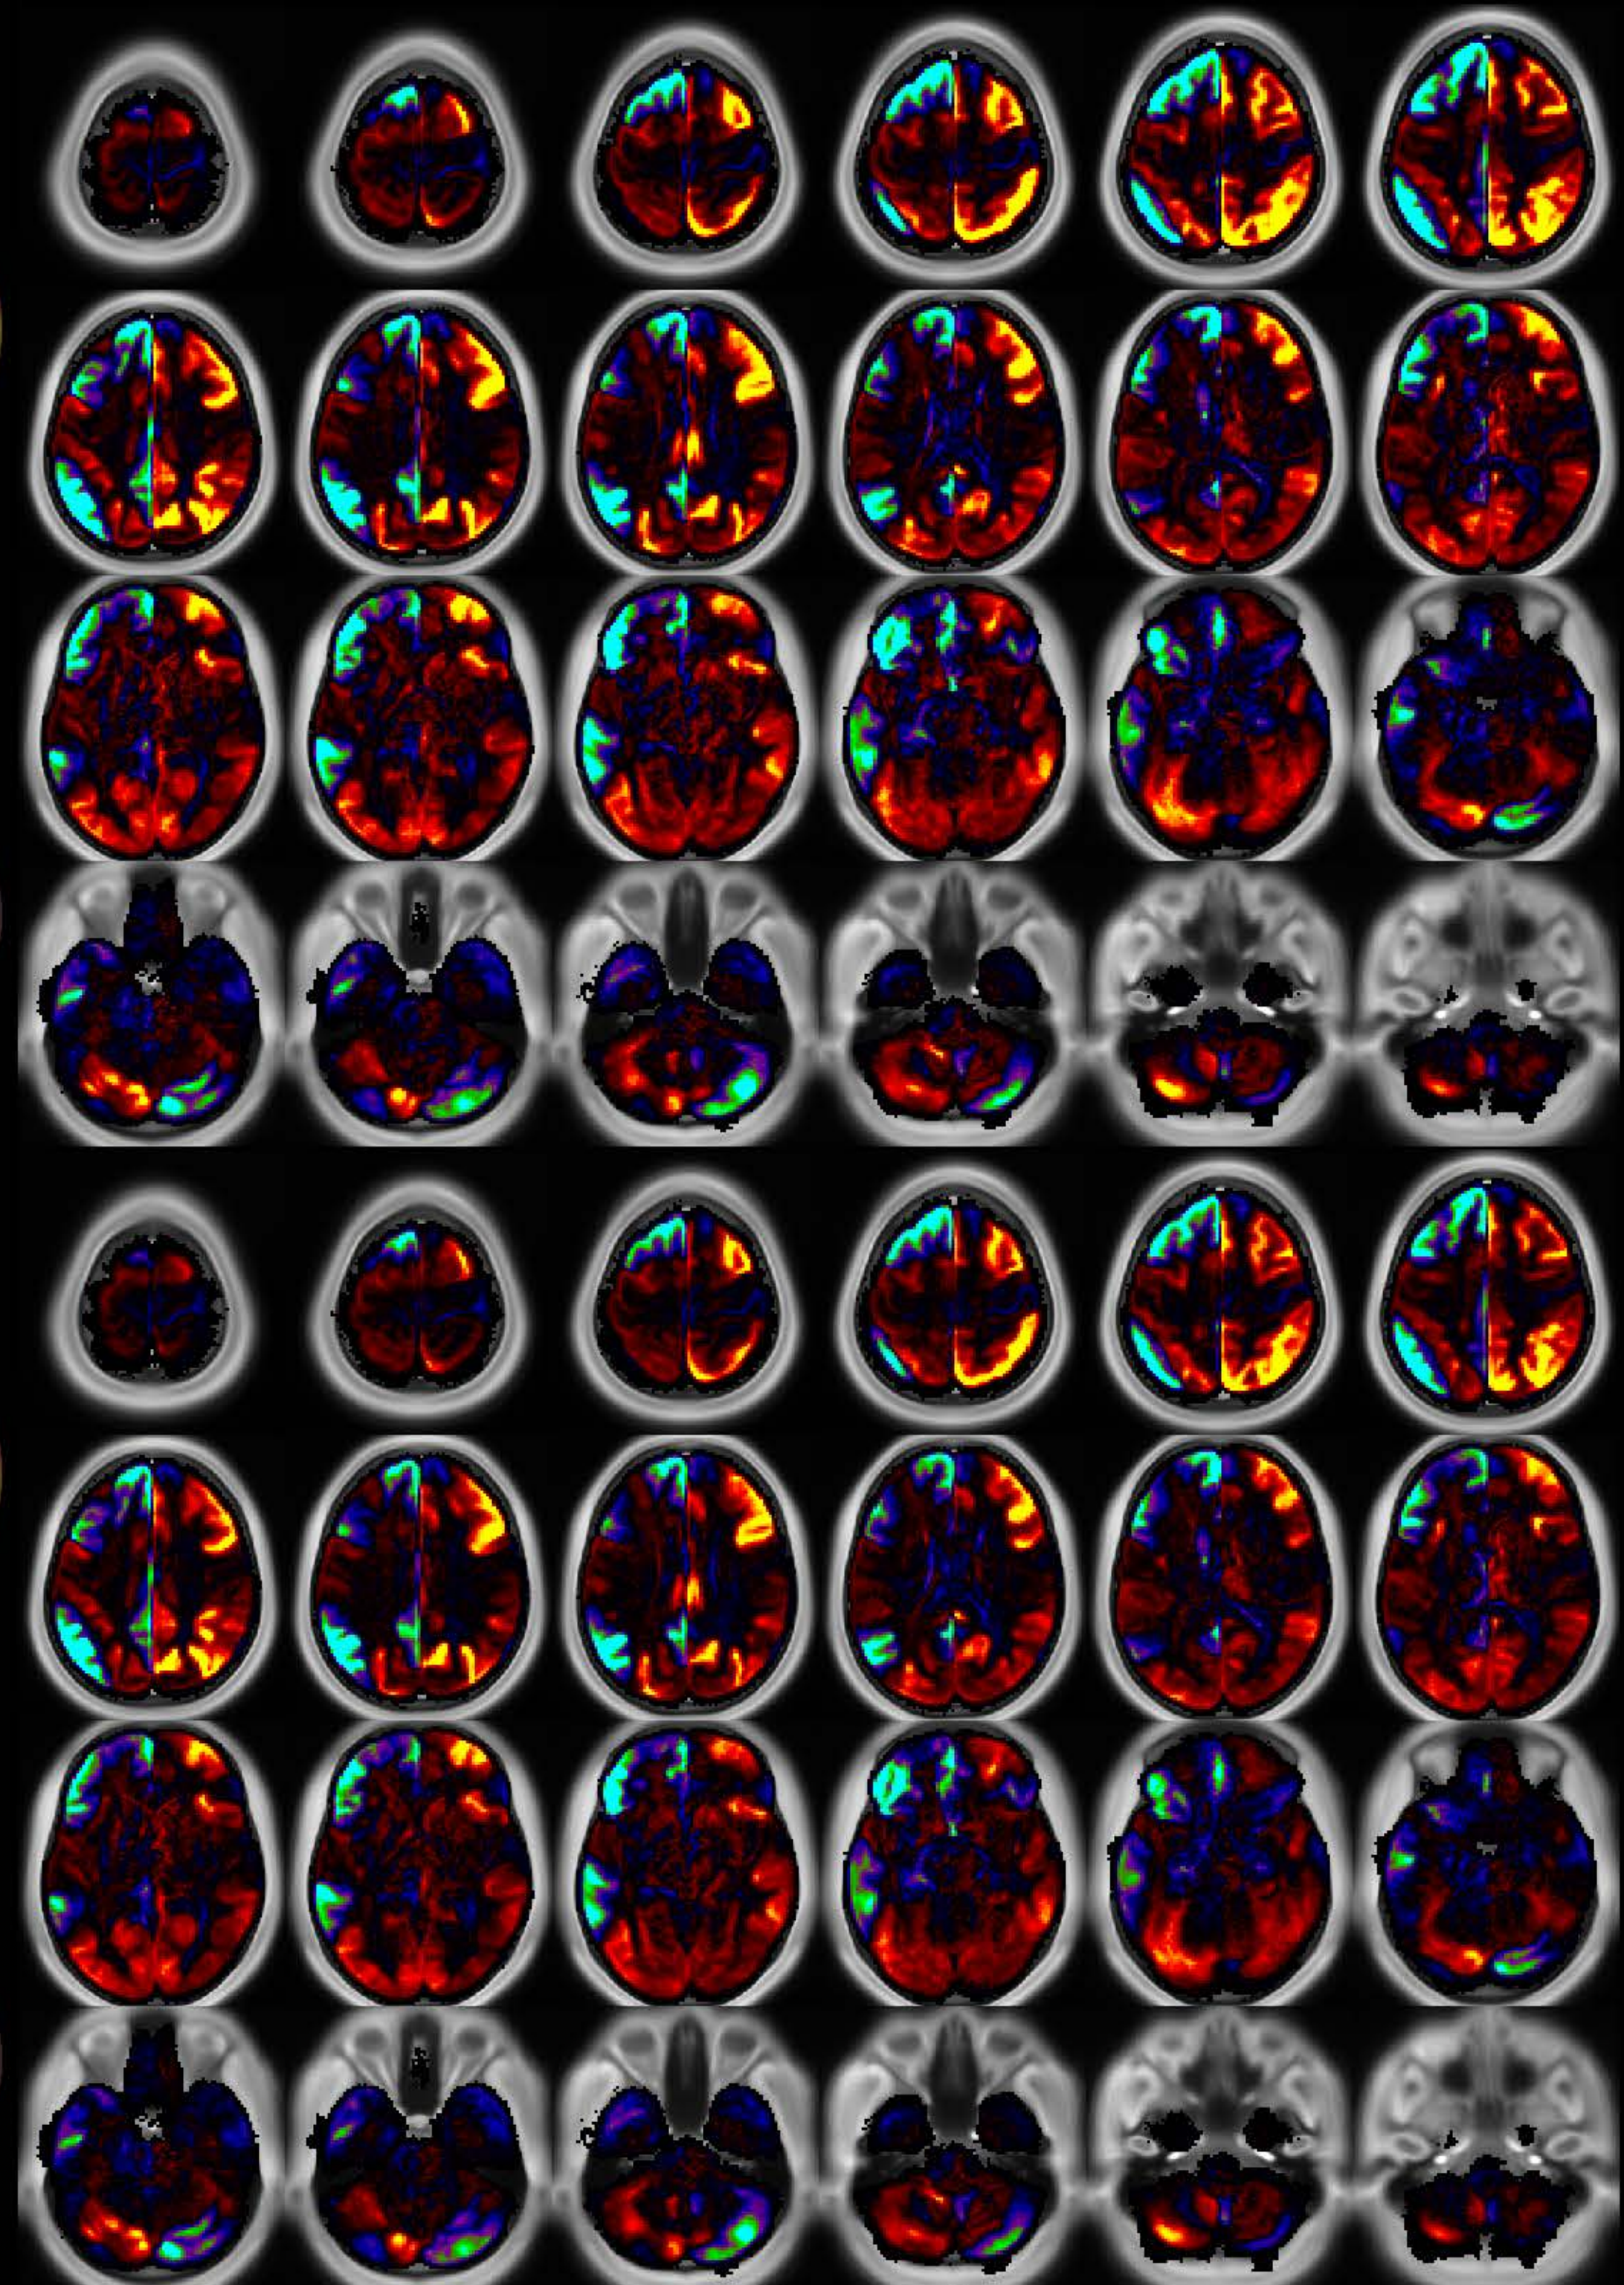

Seconds

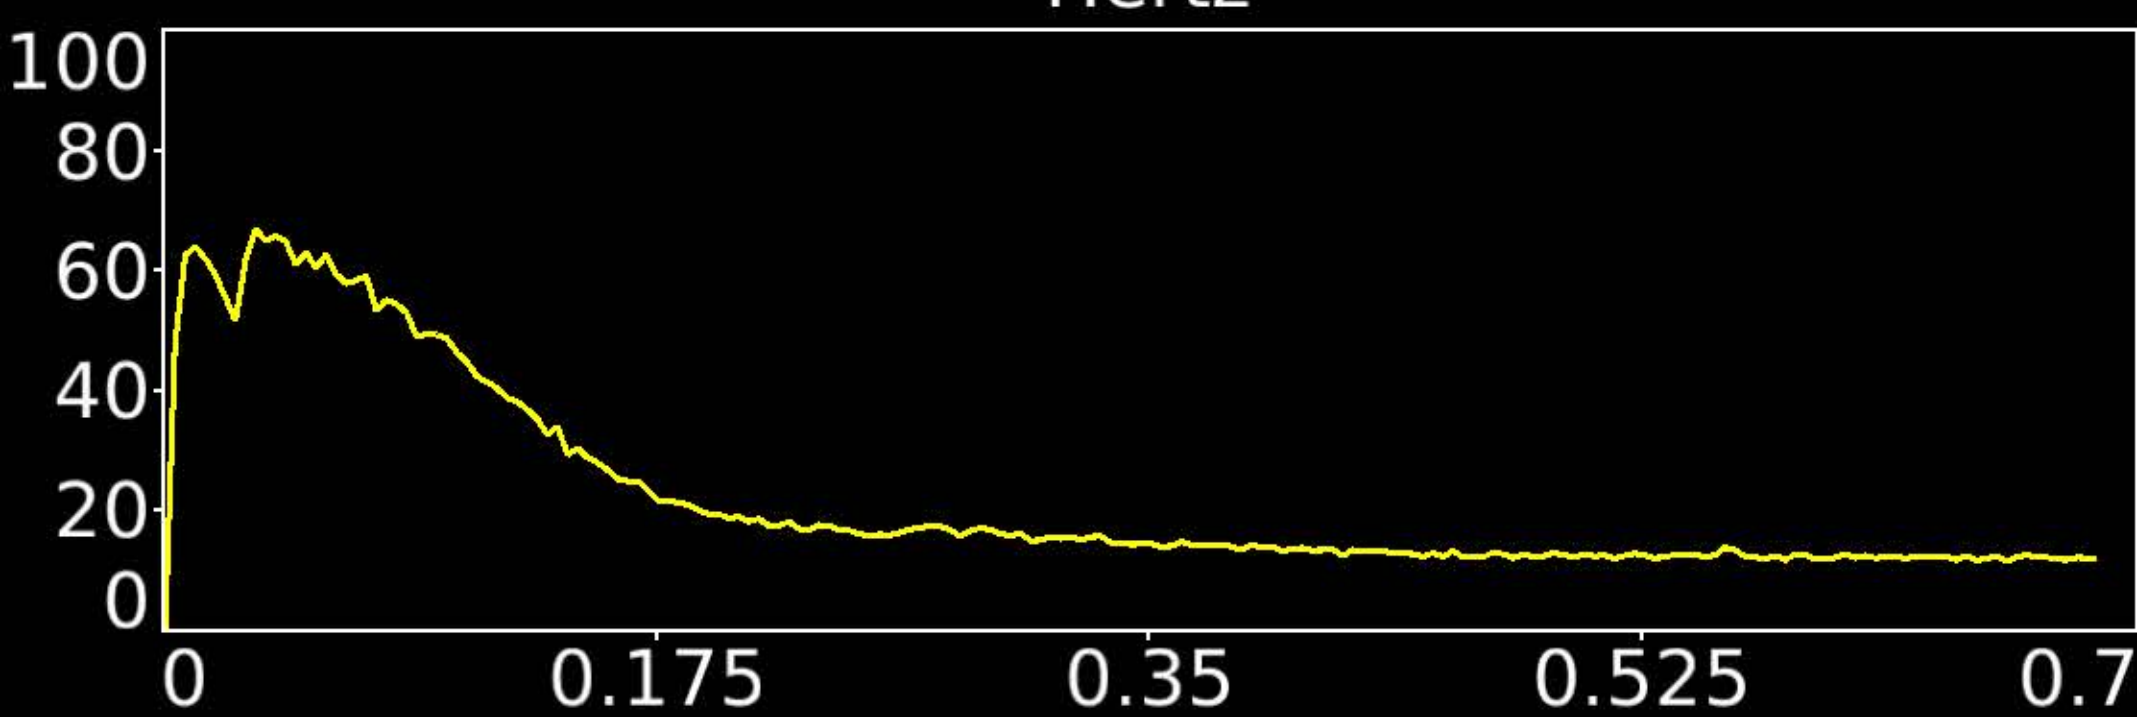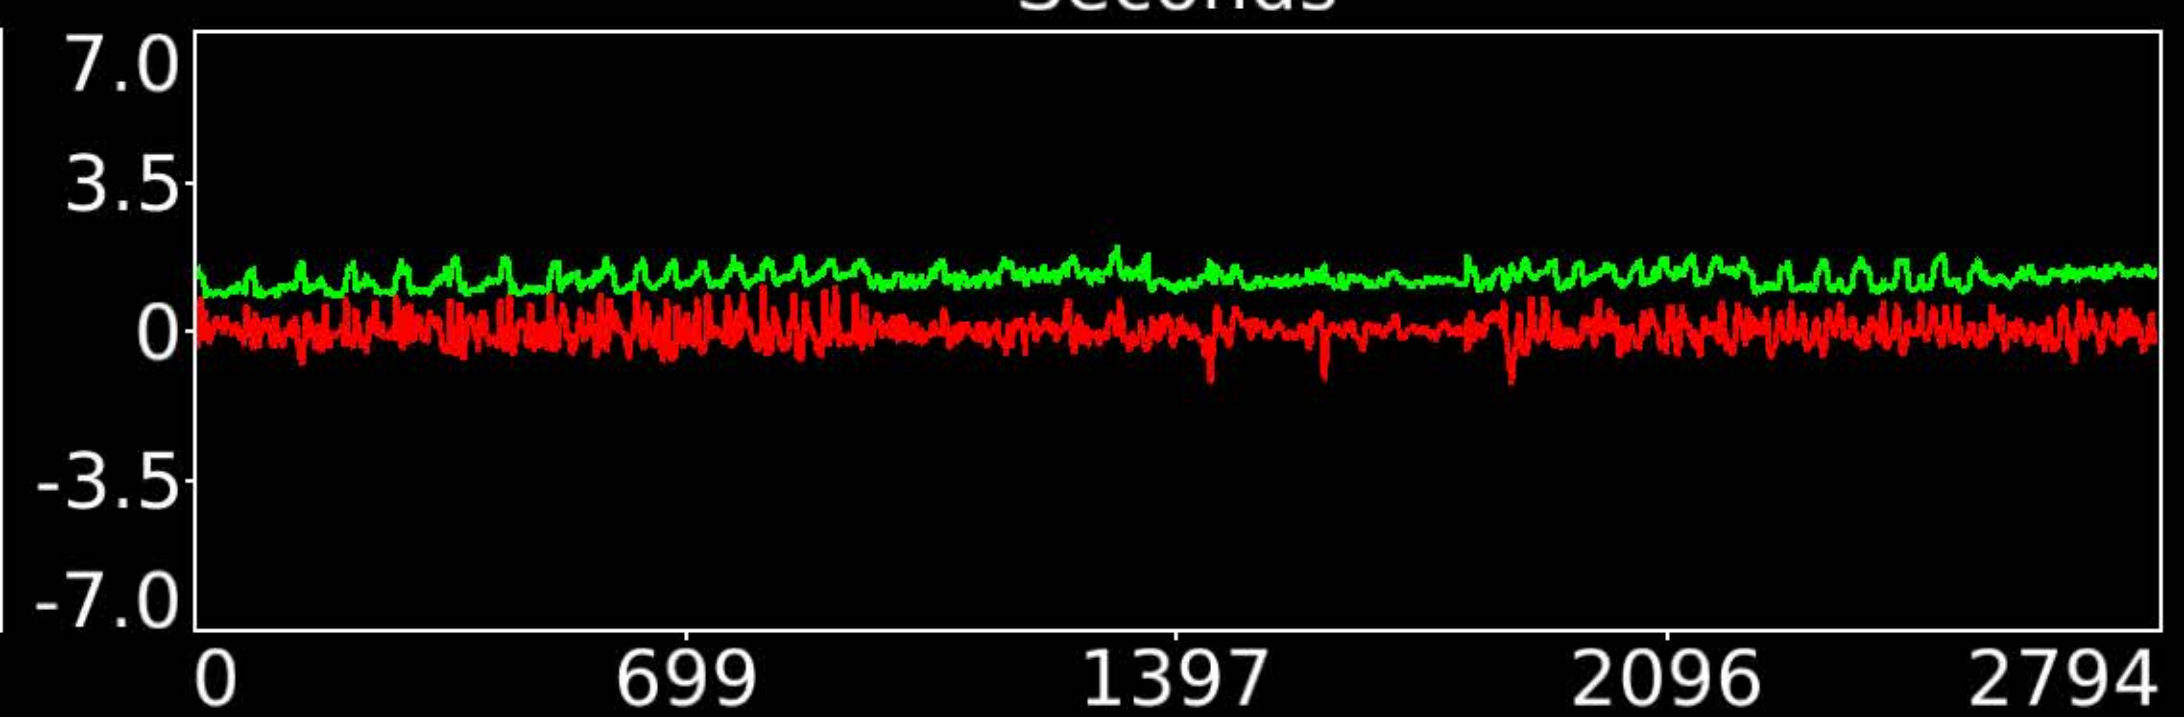

|                          |                            |                                          |  |
|--------------------------|----------------------------|------------------------------------------|--|
| Number & Class: 6 Signal |                            | Name: R Fronto-parietal > L Default Mode |  |
| RVT Correlated: No       | DVARS Dip Associated: No   | Cross-Subject Variable: Yes              |  |
| Single Subject: No       | % Variance Explained: 3.04 | Globality Index: 1.02                    |  |
| Task Component: -12      | Rest Component: No         | Task Modulated: No                       |  |

Rationale: Spatial map includes positive and negative patches that respect known RSNs (e.g. Default Mode Network and Fronto-parietal Network)



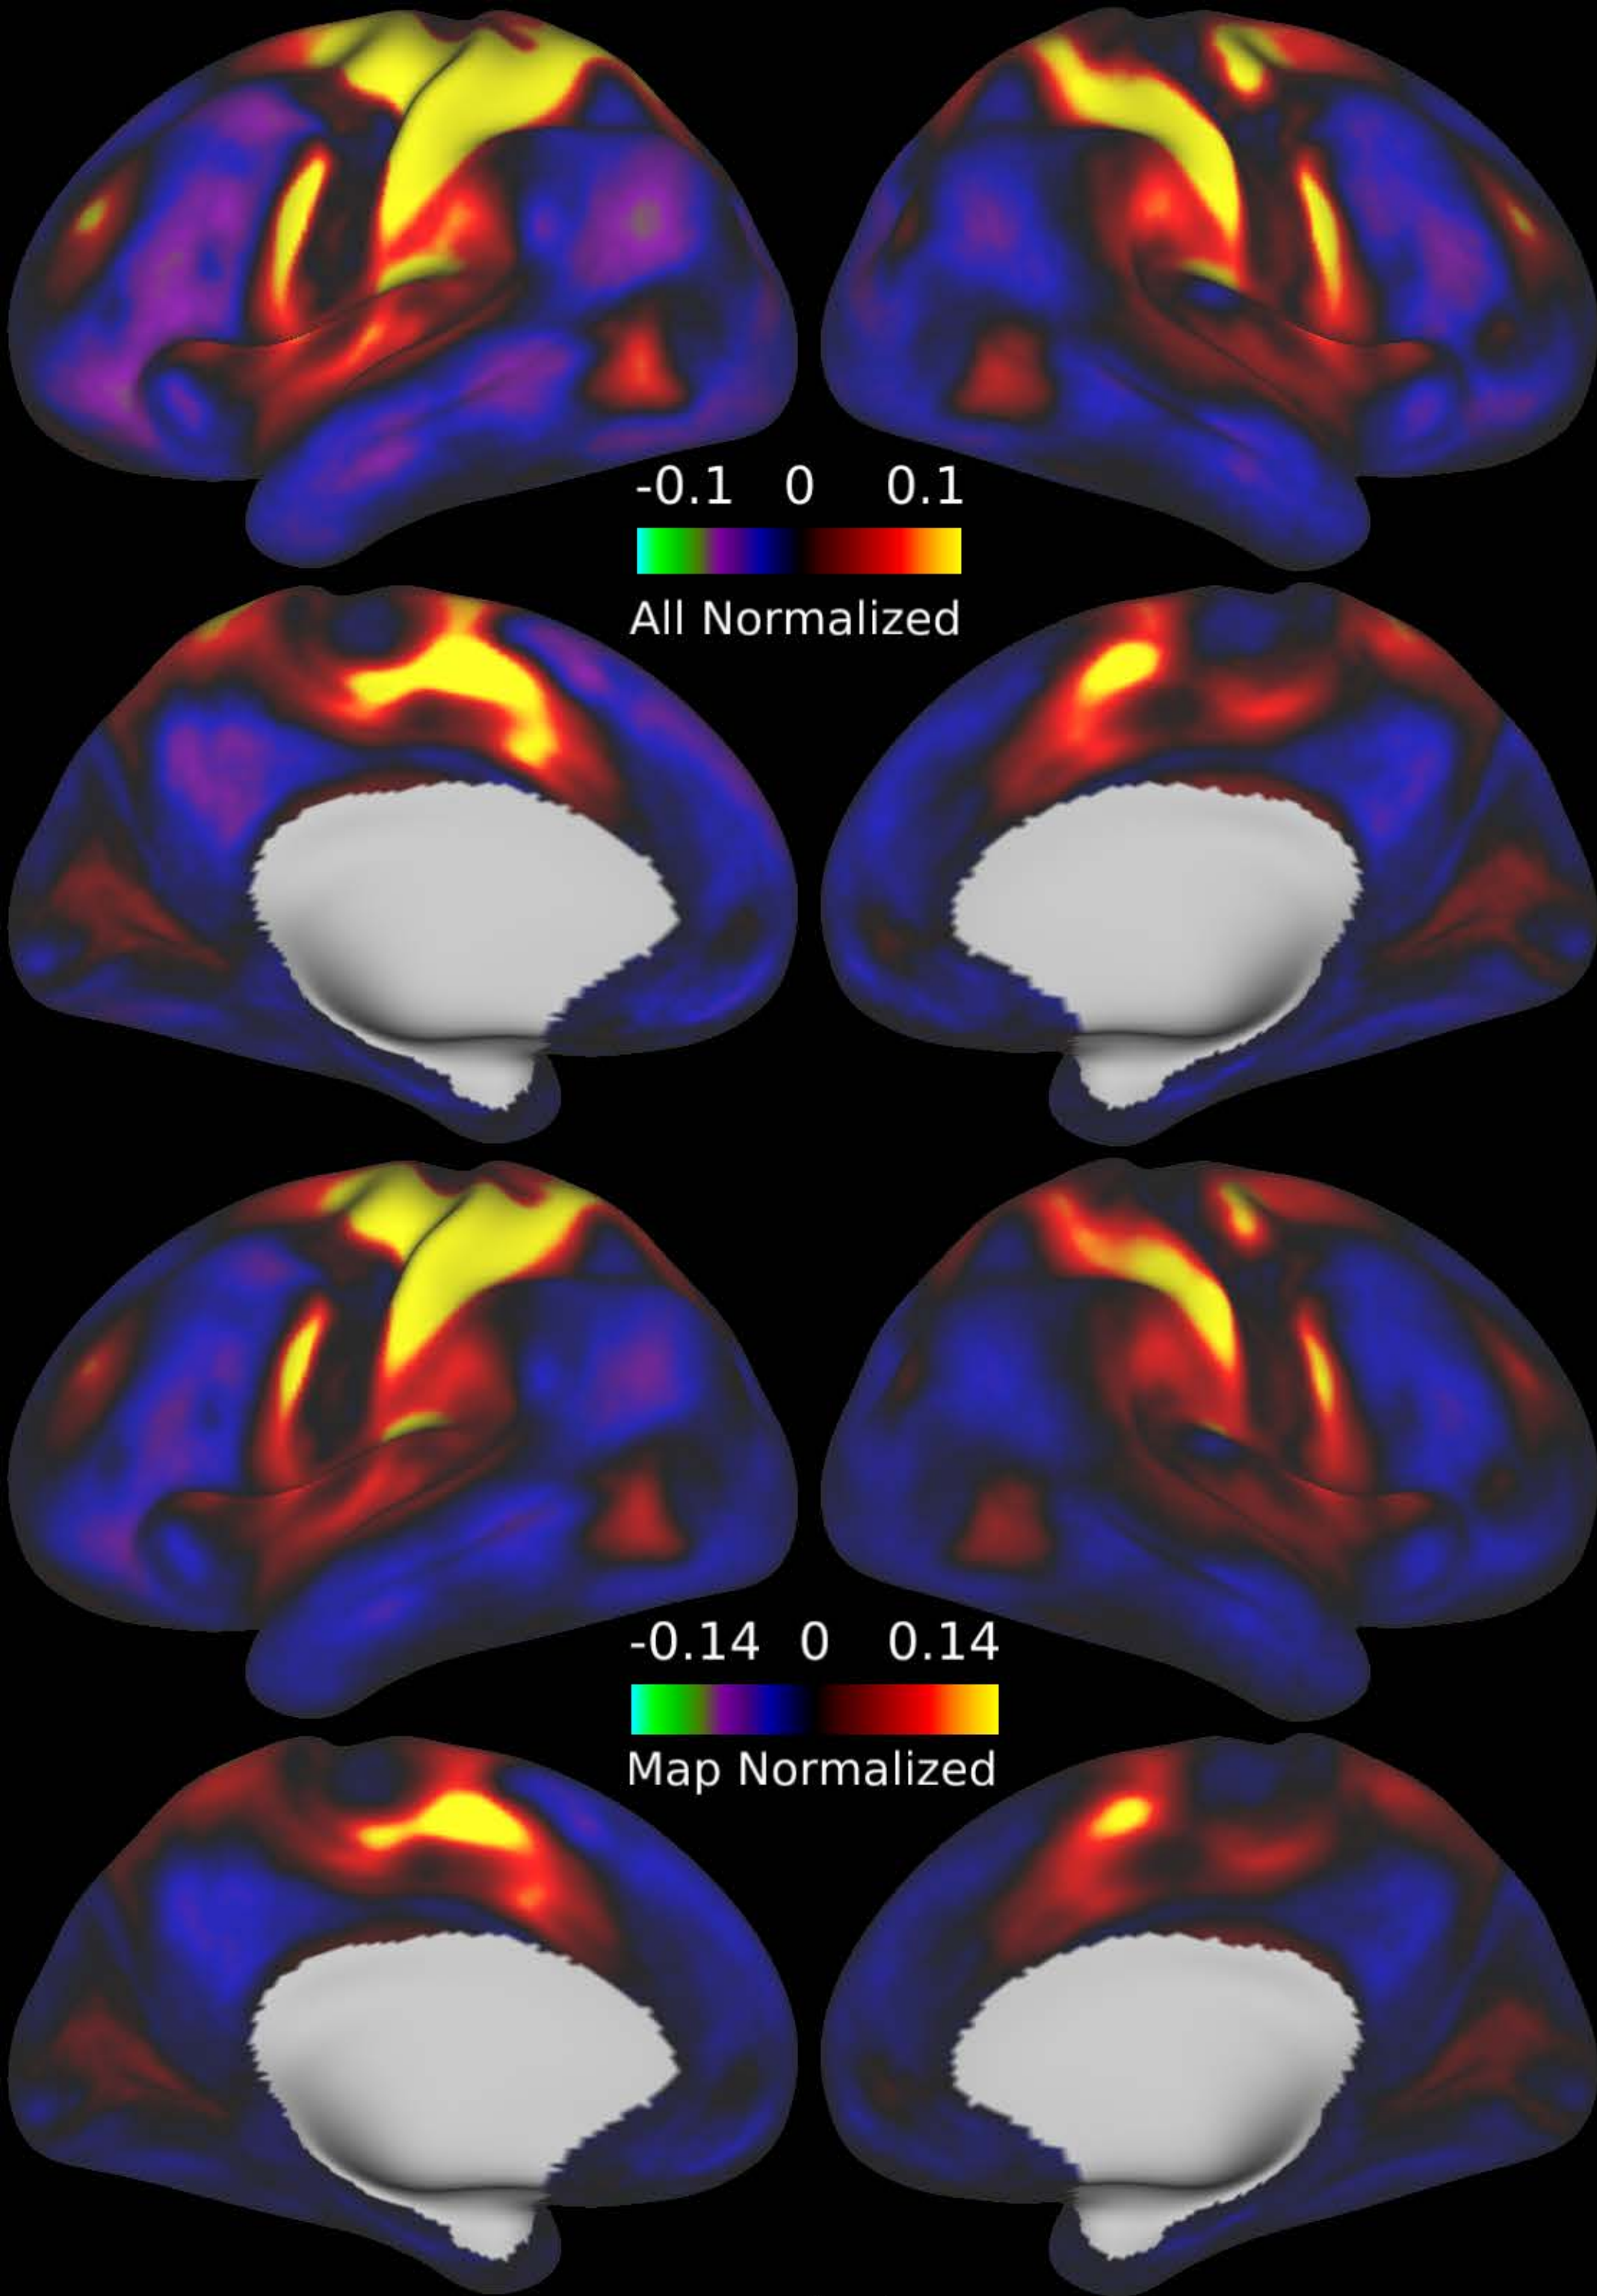

Hertz

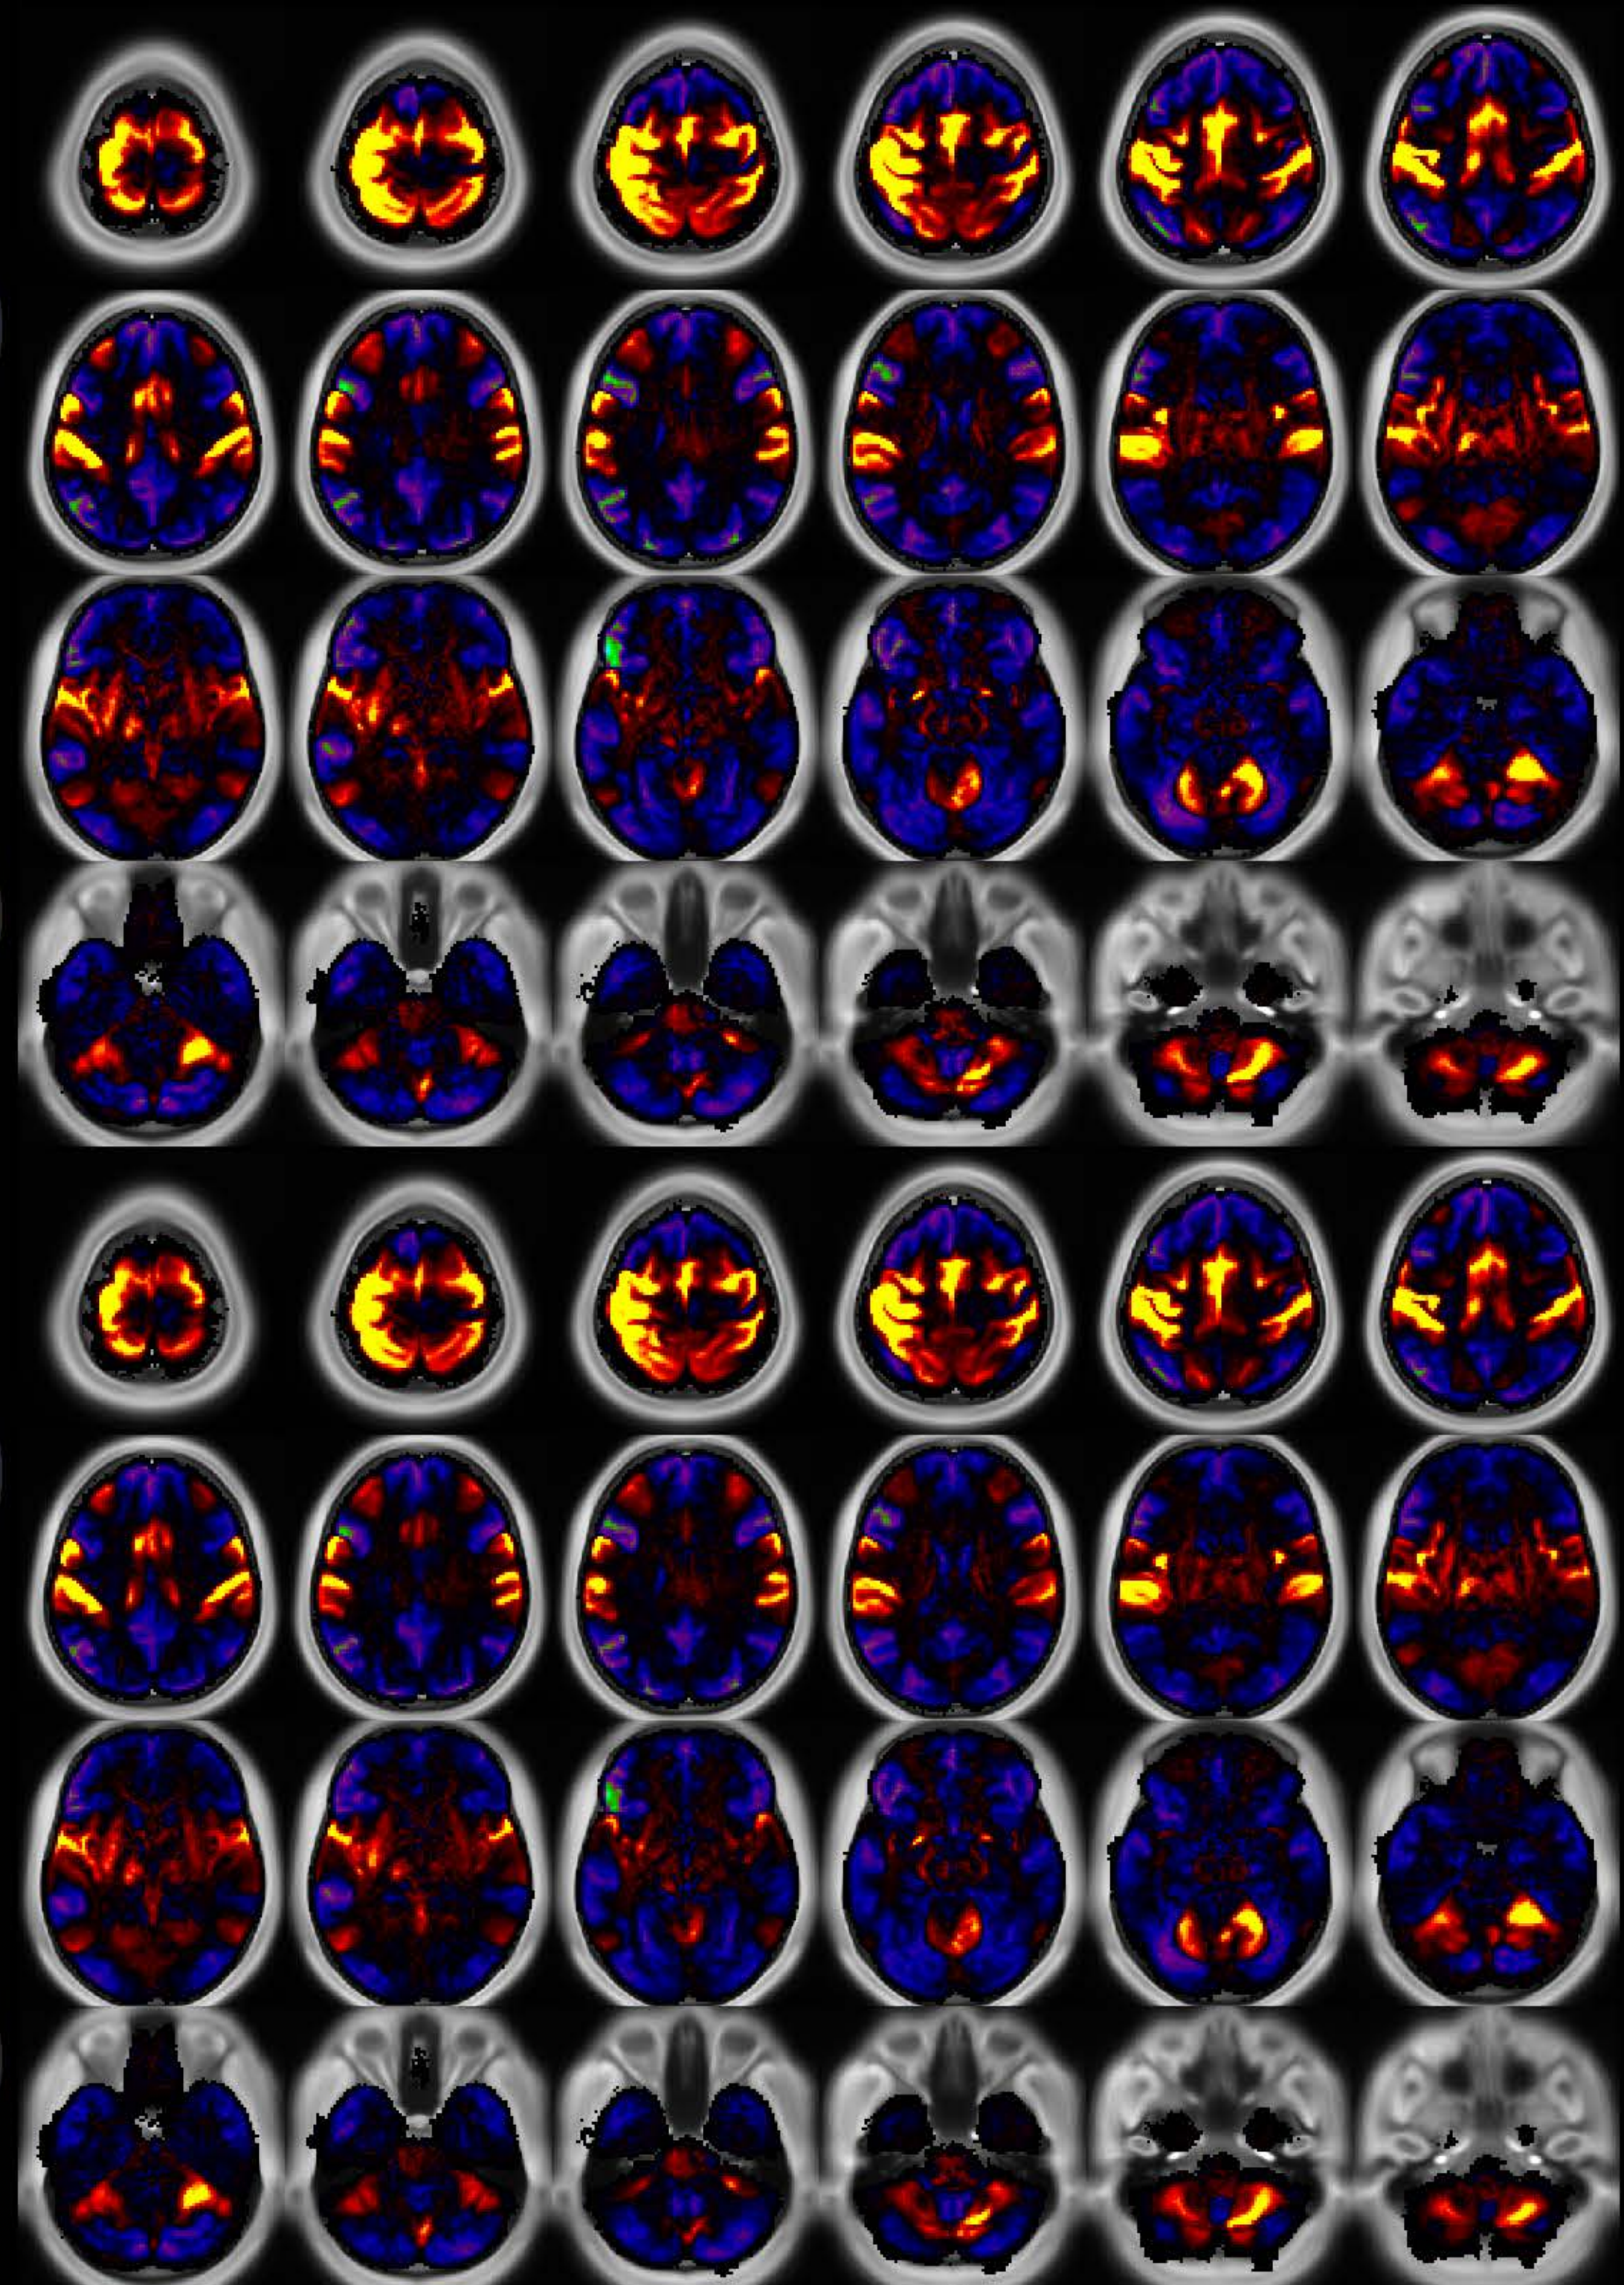

Seconds

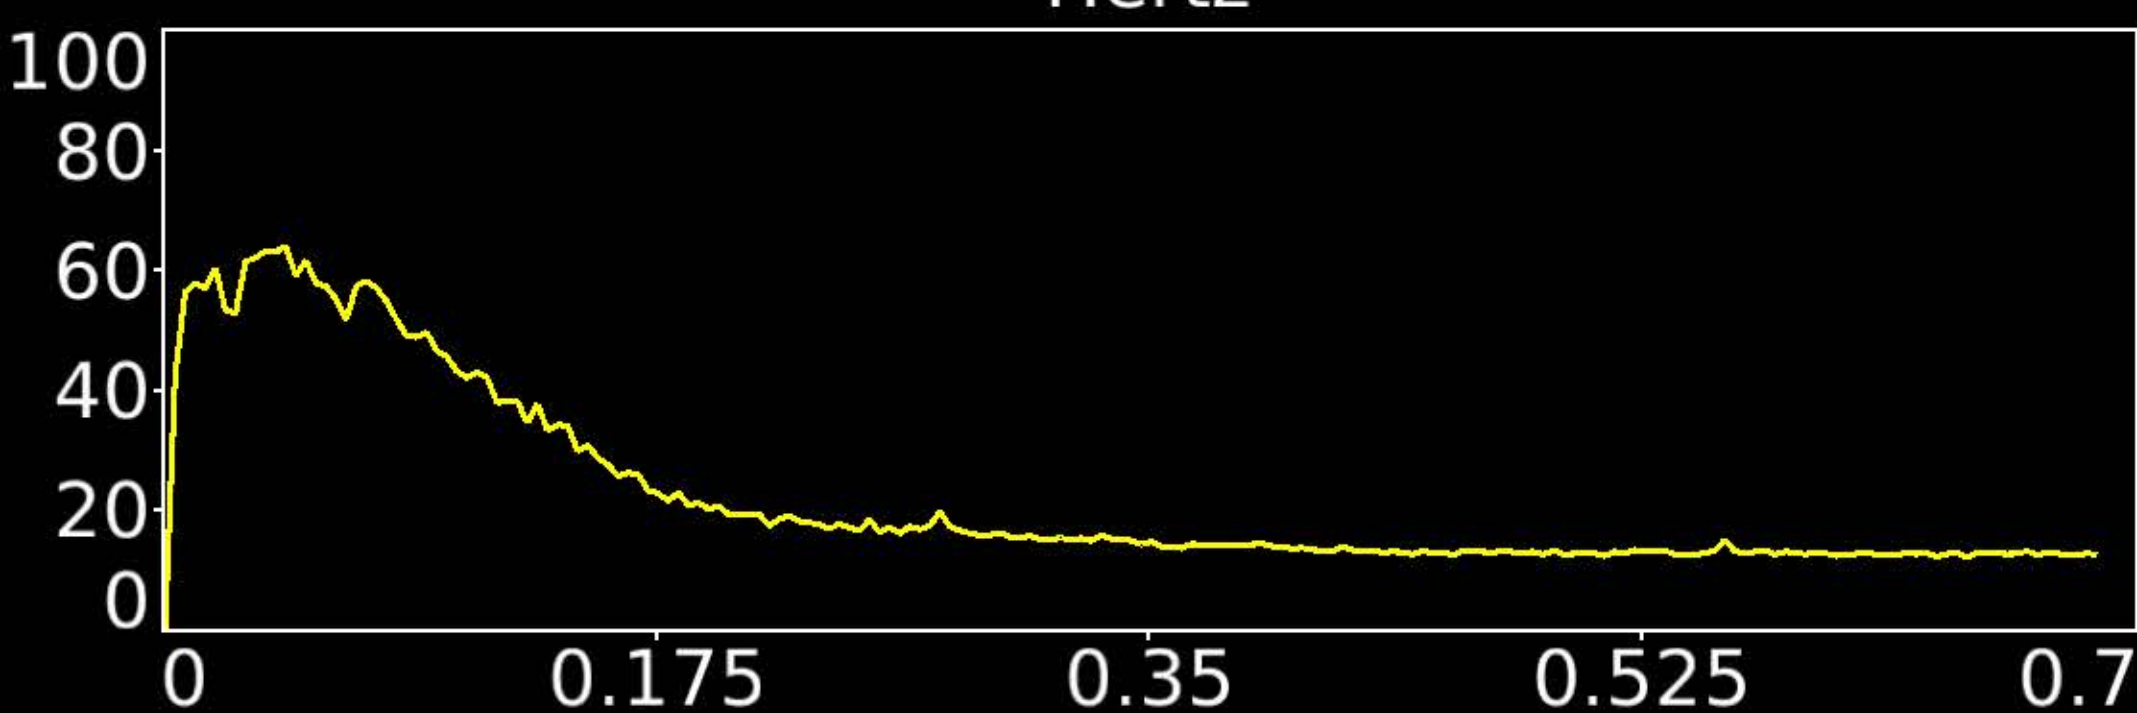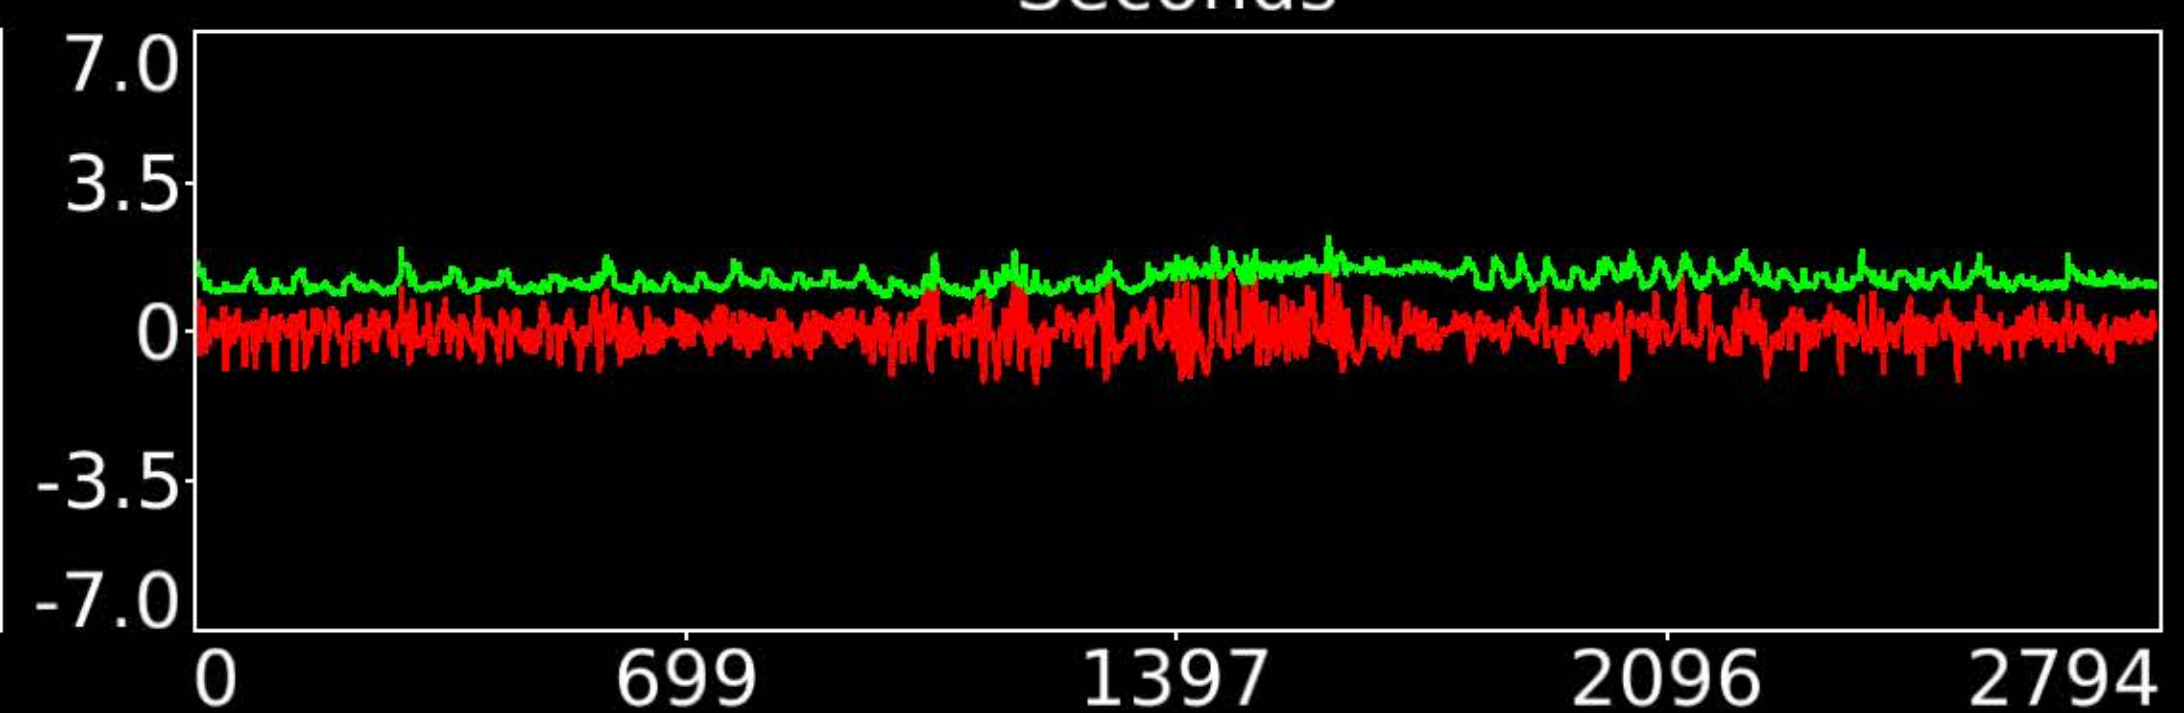

|                          |                            |                                |  |
|--------------------------|----------------------------|--------------------------------|--|
| Number & Class: 7 Signal |                            | Name: Right Hand Motor Network |  |
| RVT Correlated: No       | DVARS Dip Associated: Yes  | Cross-Subject Variable: Yes    |  |
| Single Subject: No       | % Variance Explained: 2.97 | Globality Index: 0.16          |  |
| Task Component: 6        | Rest Component: 33         | Task Modulated: No             |  |

Rationale: Spatial map includes positive and negative patches that respect known somatotopic sensori-motor organization (Right Hand)



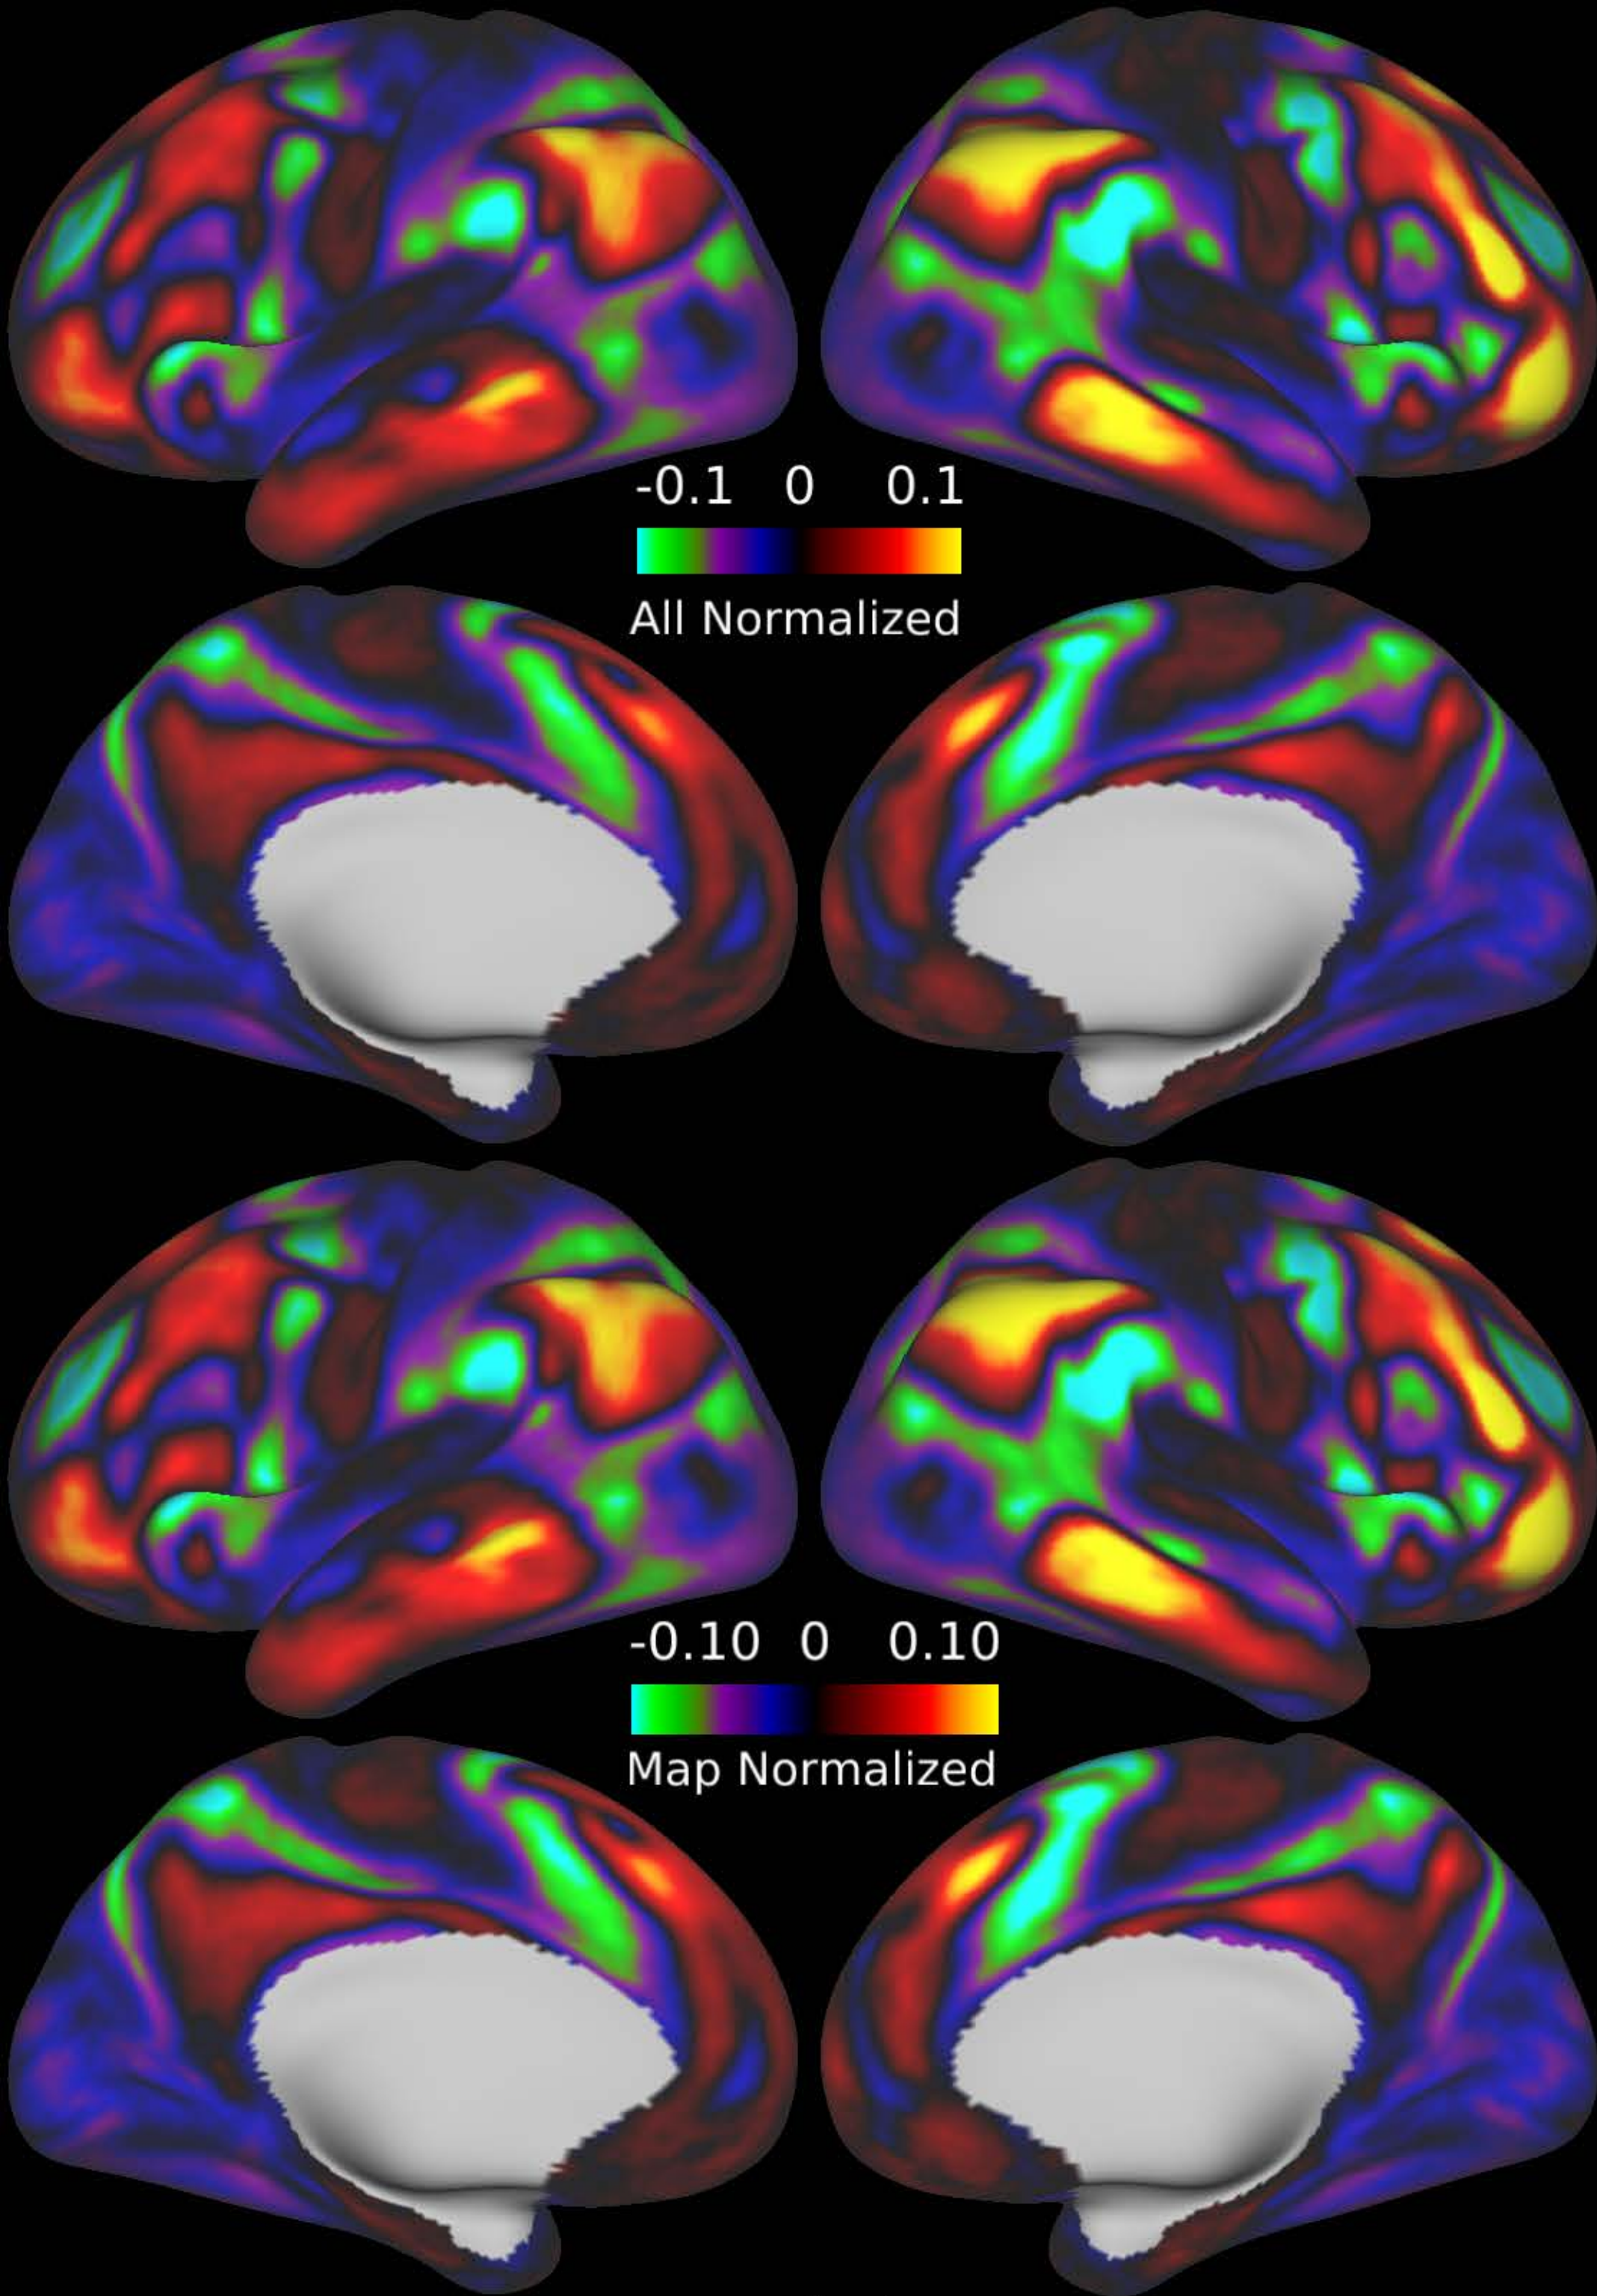

Hertz

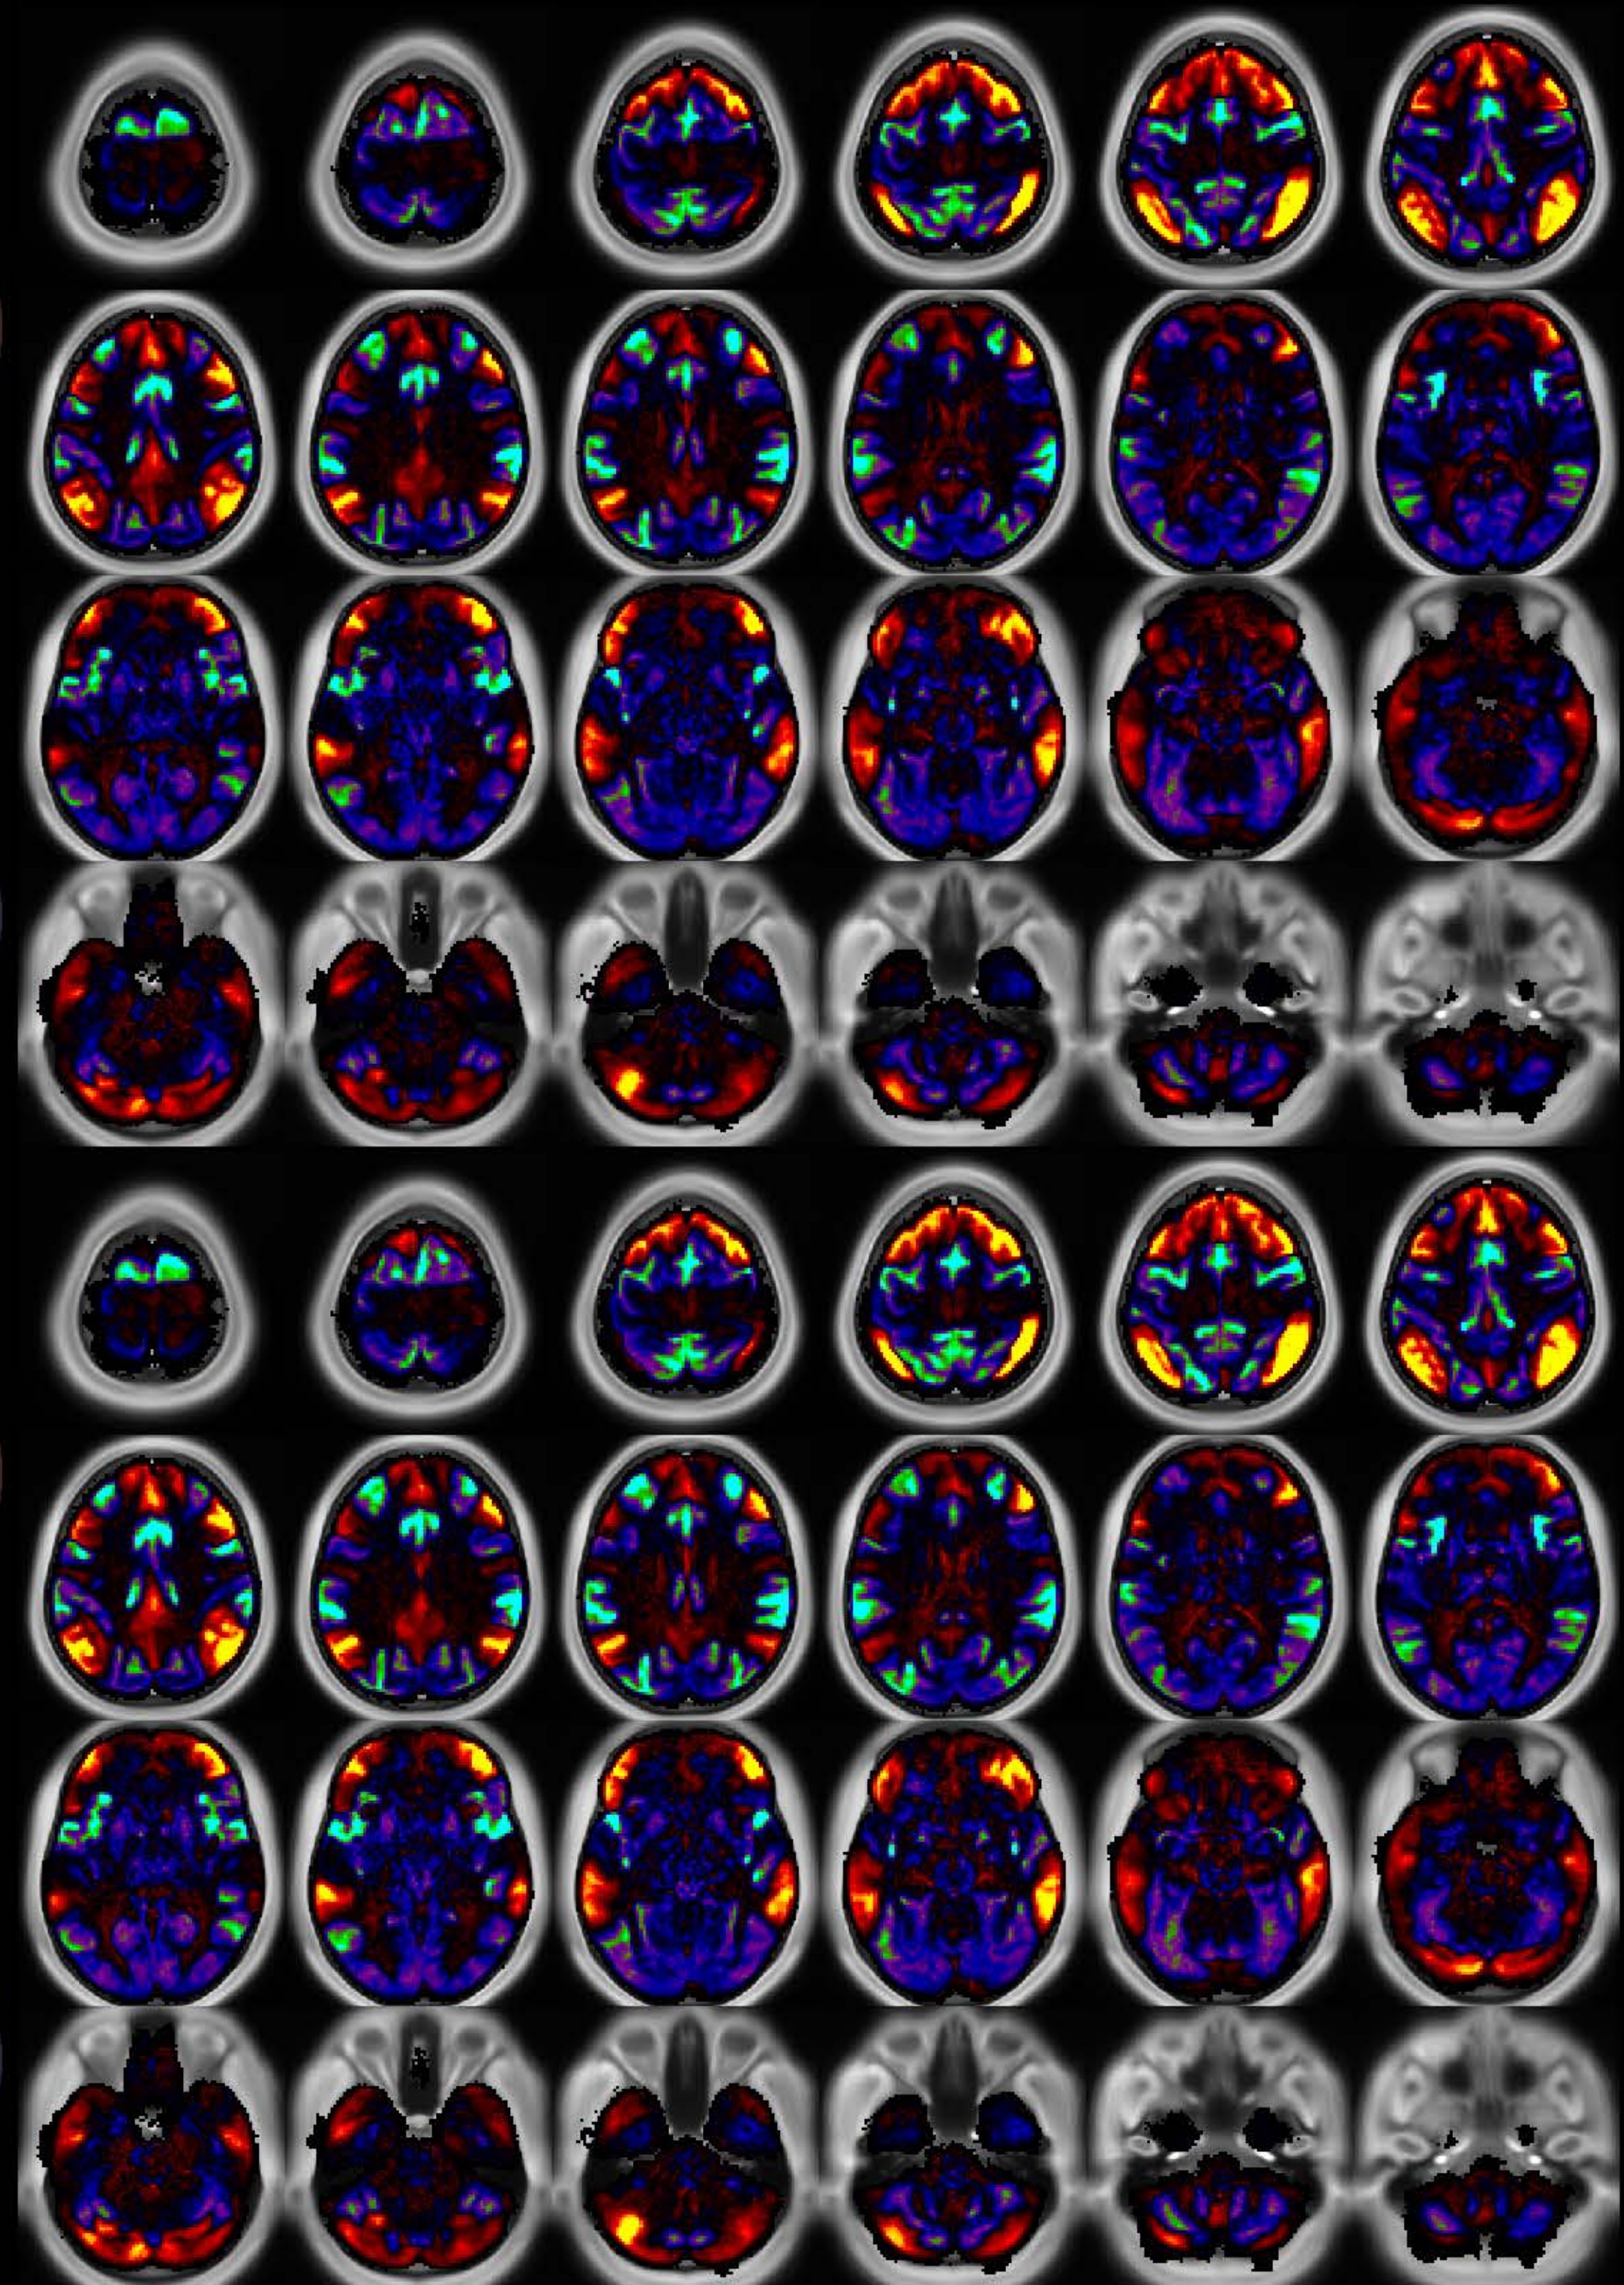

Seconds

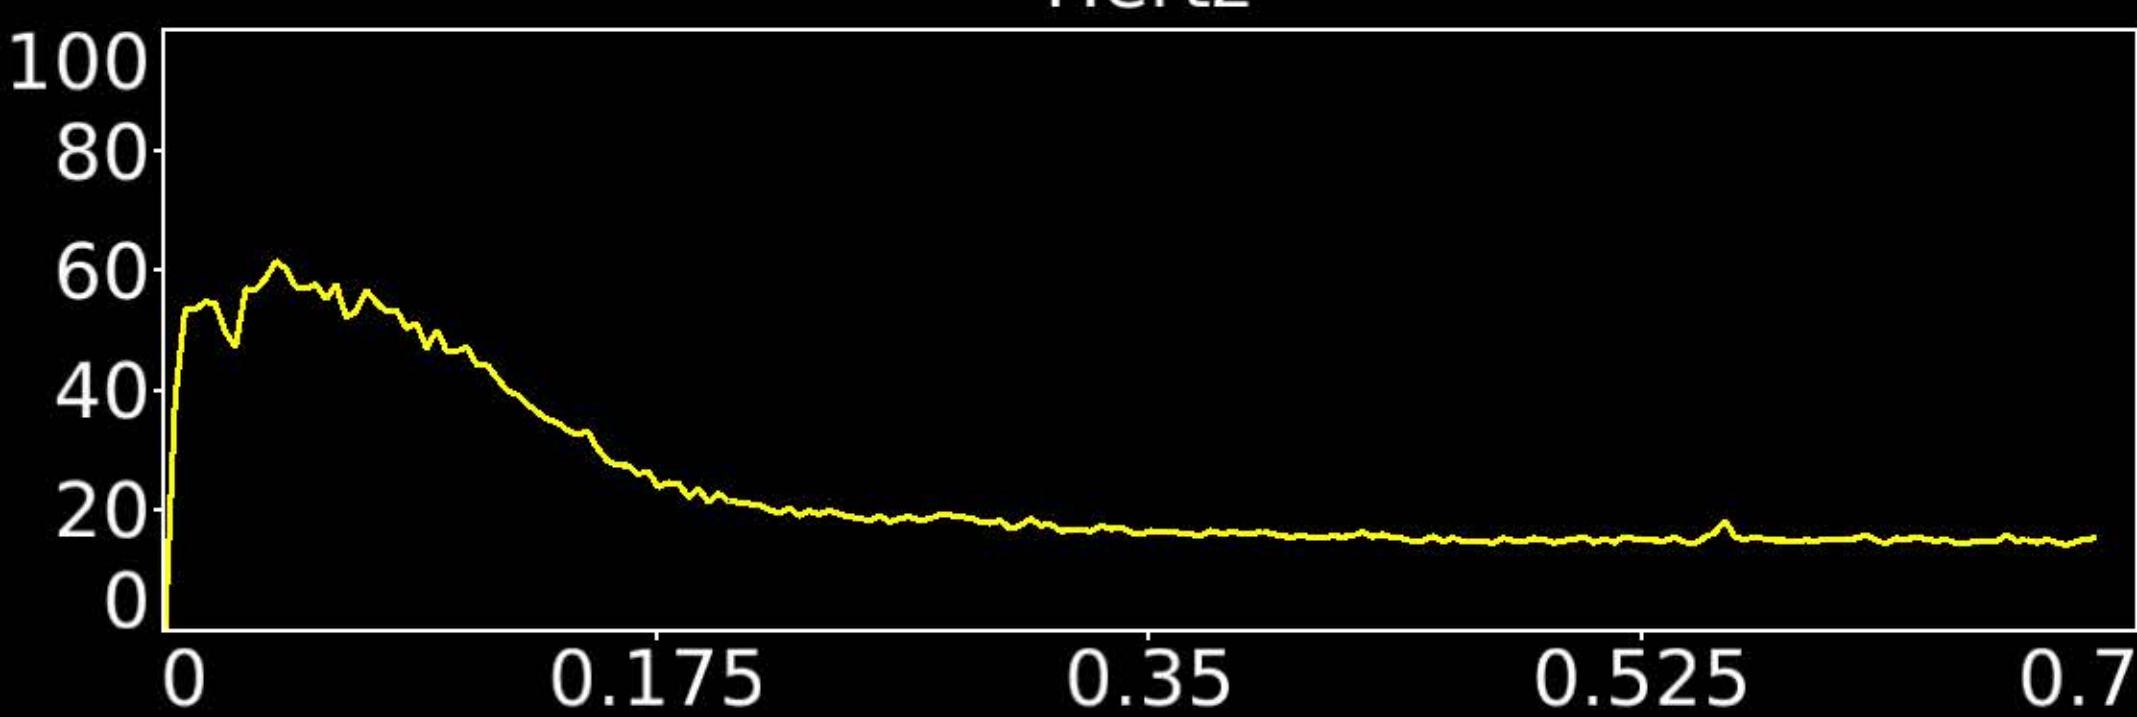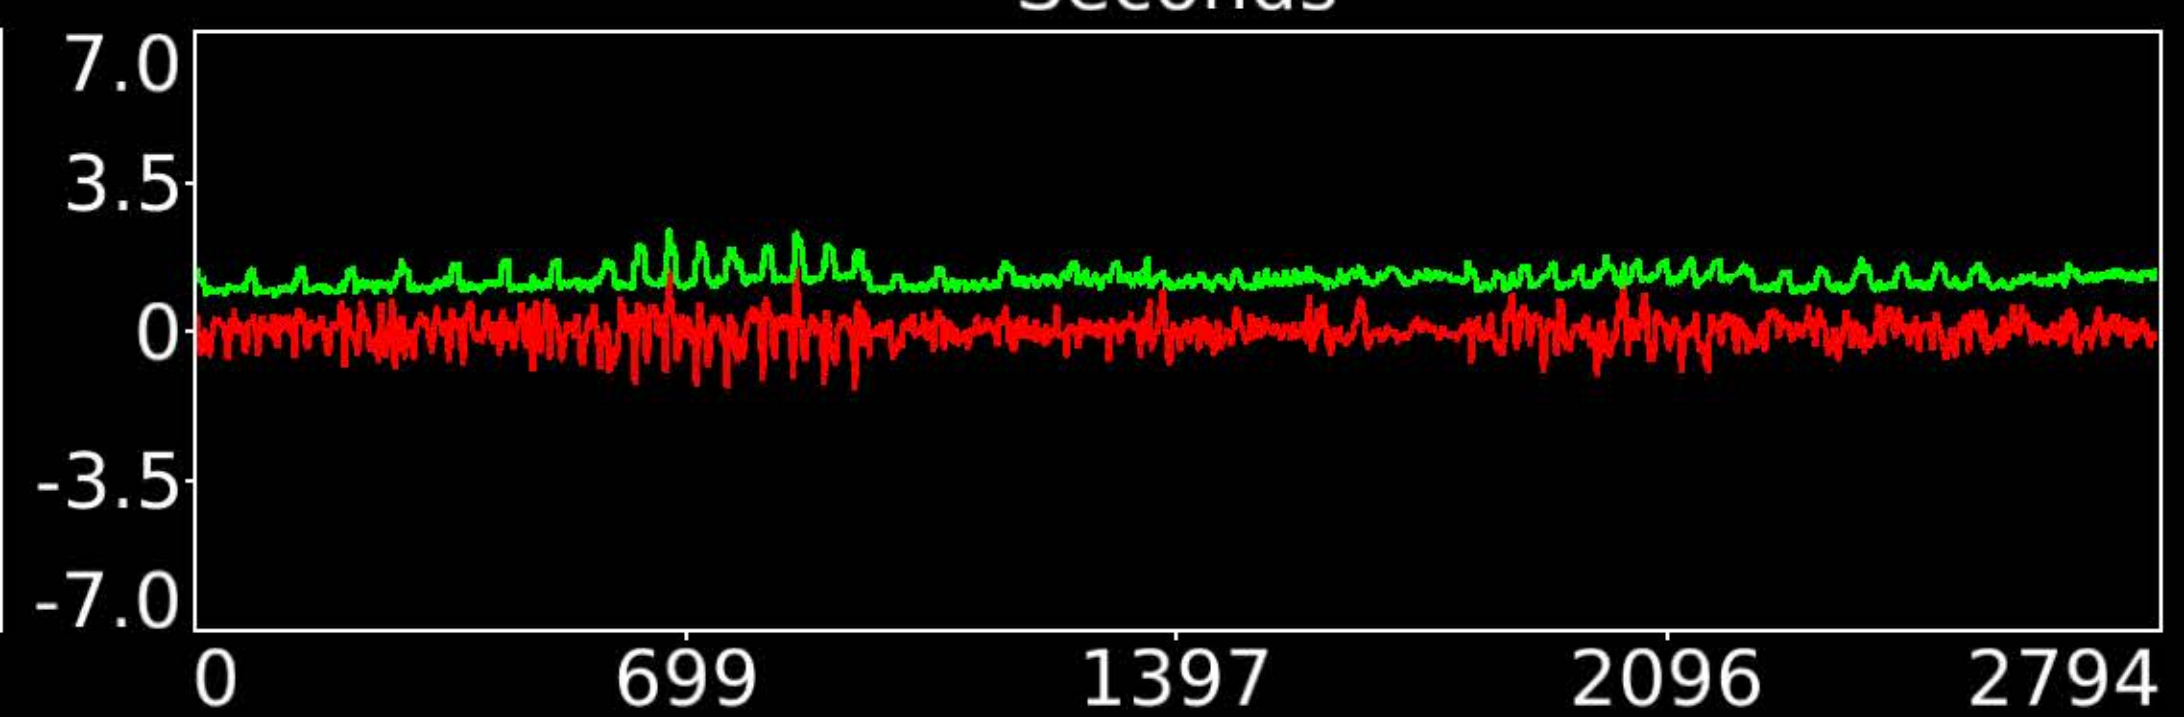

|                          |                            |                               |  |
|--------------------------|----------------------------|-------------------------------|--|
| Number & Class: 8 Signal |                            | Name: Subsidiary Default Mode |  |
| RVT Correlated: No       | DVARS Dip Associated: No   | Cross-Subject Variable: No    |  |
| Single Subject: No       | % Variance Explained: 2.91 | Globality Index: 0.78         |  |
| Task Component: -9       | Rest Component: 9          | Task Modulated: No            |  |

Rationale: Spatial map includes positive and negative patches that respect known RSNs (e.g. Default Mode Network)



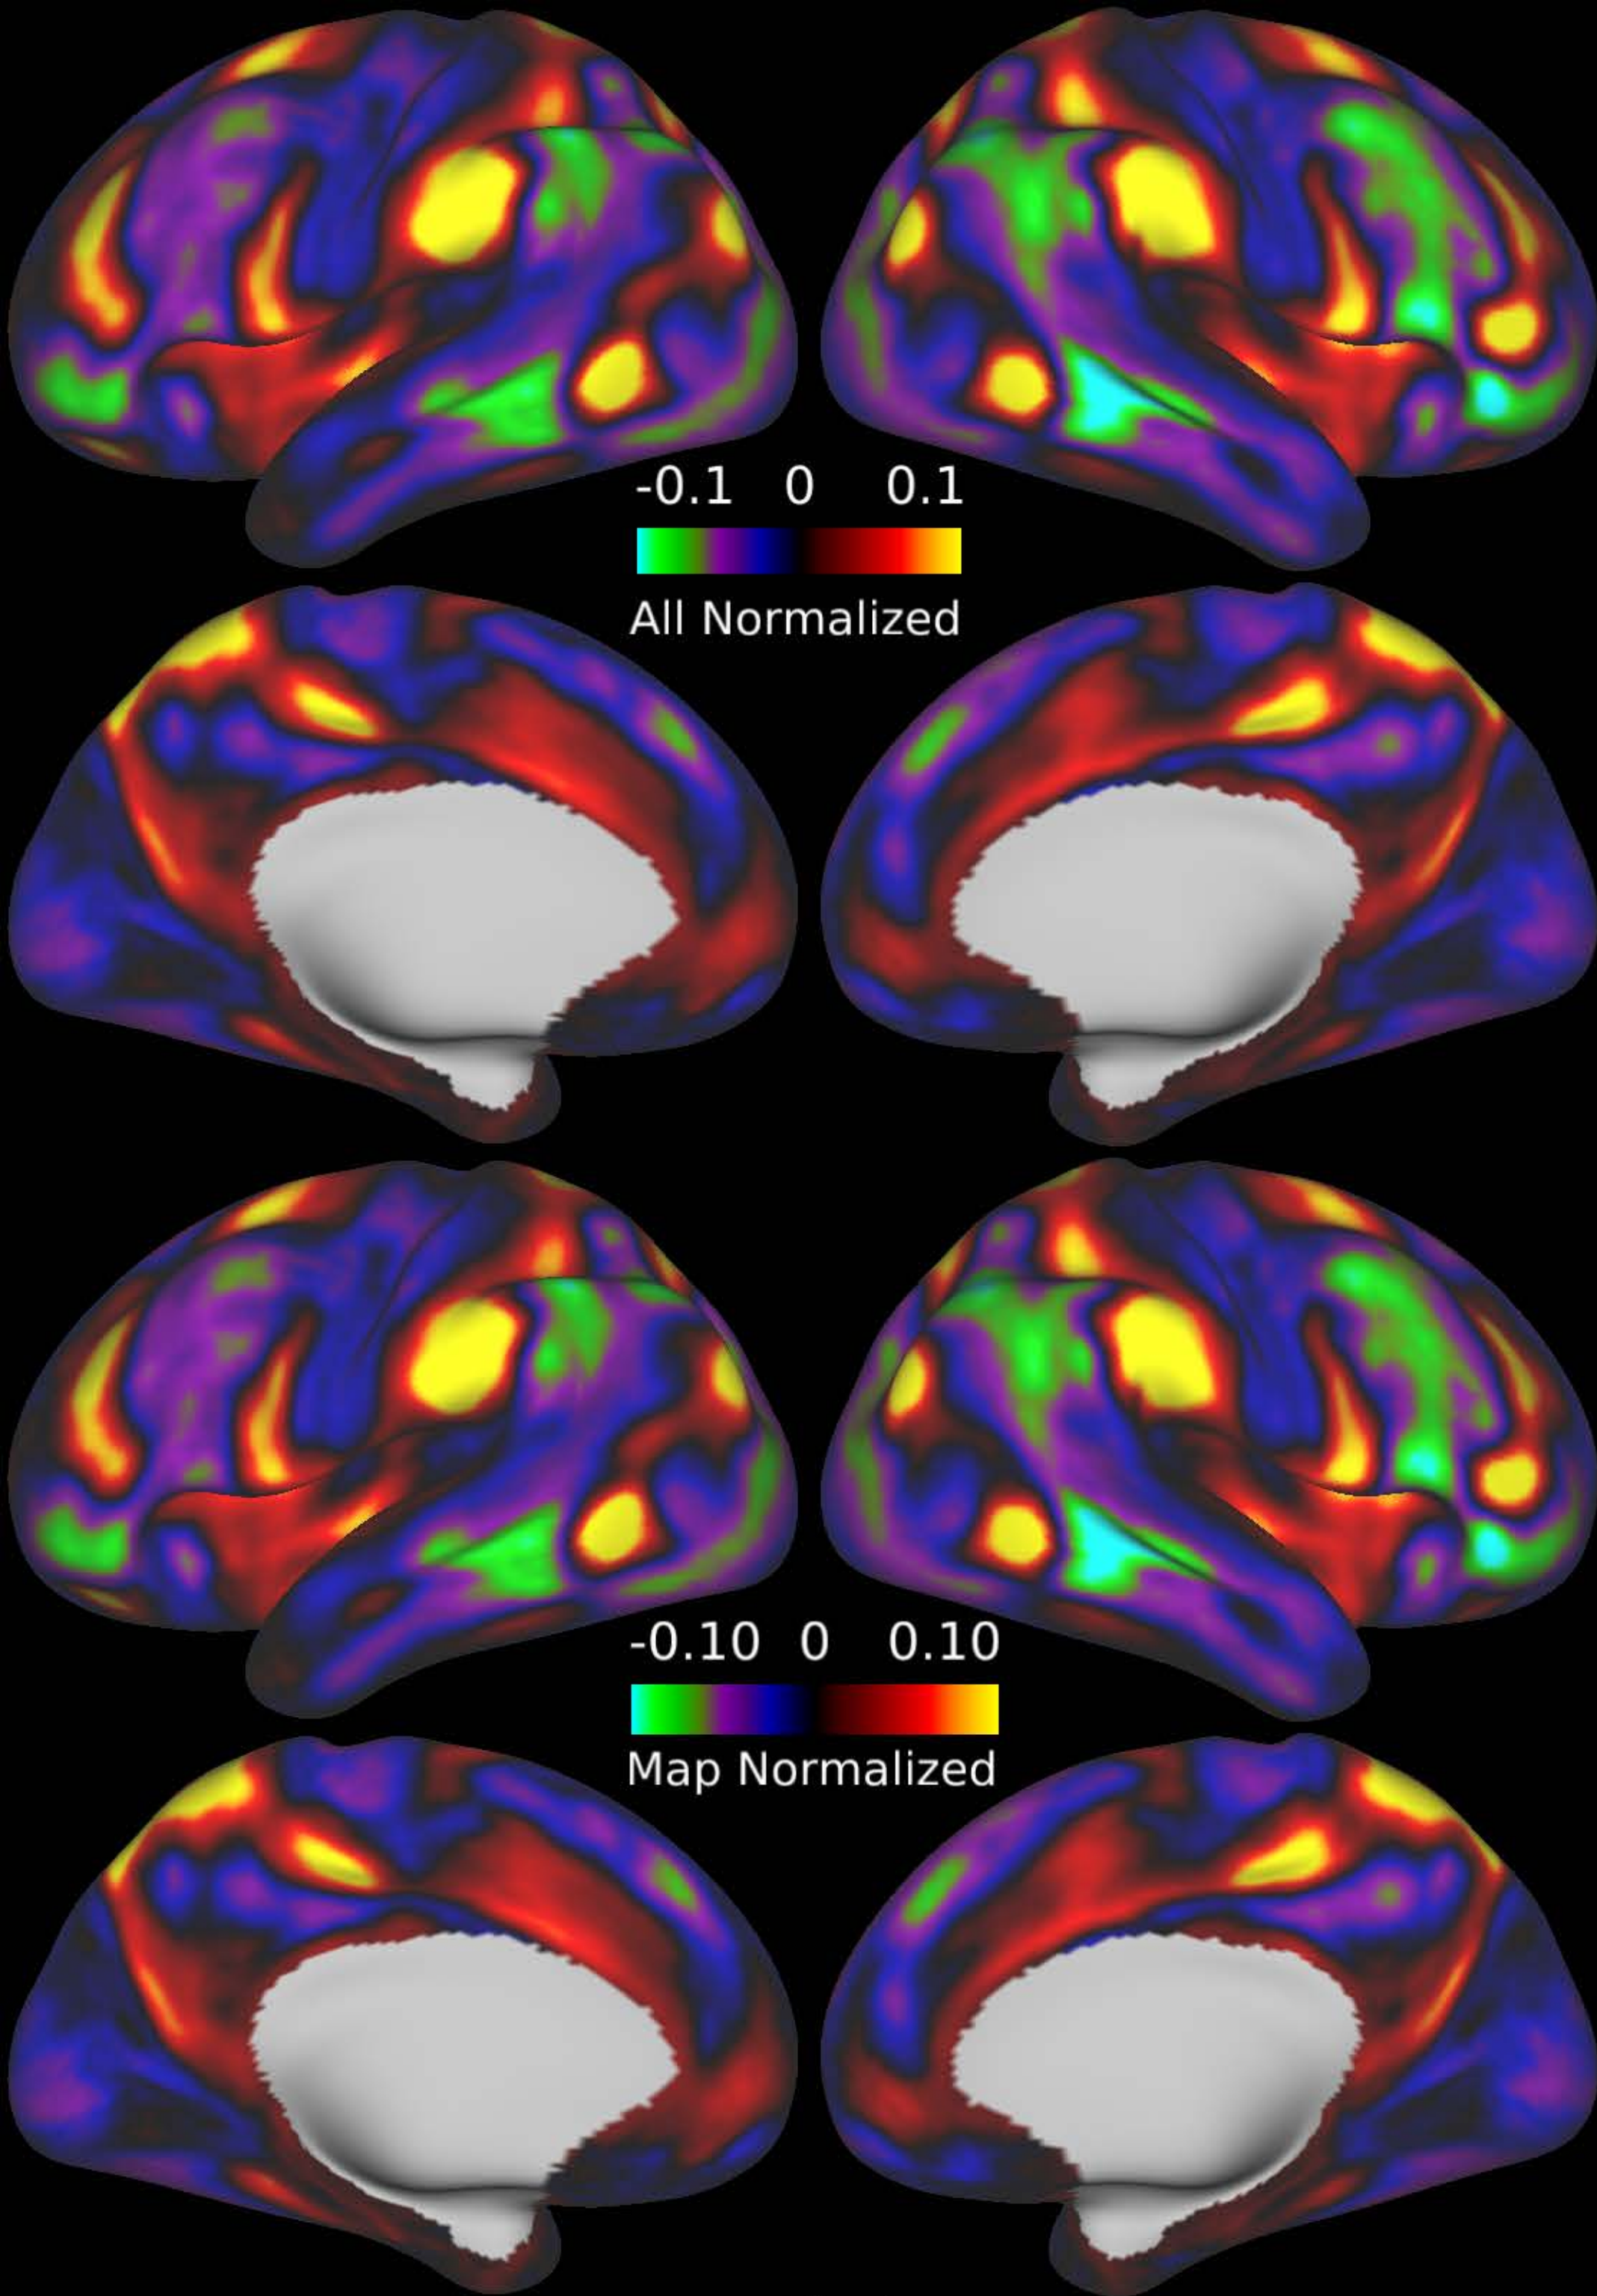

Hertz

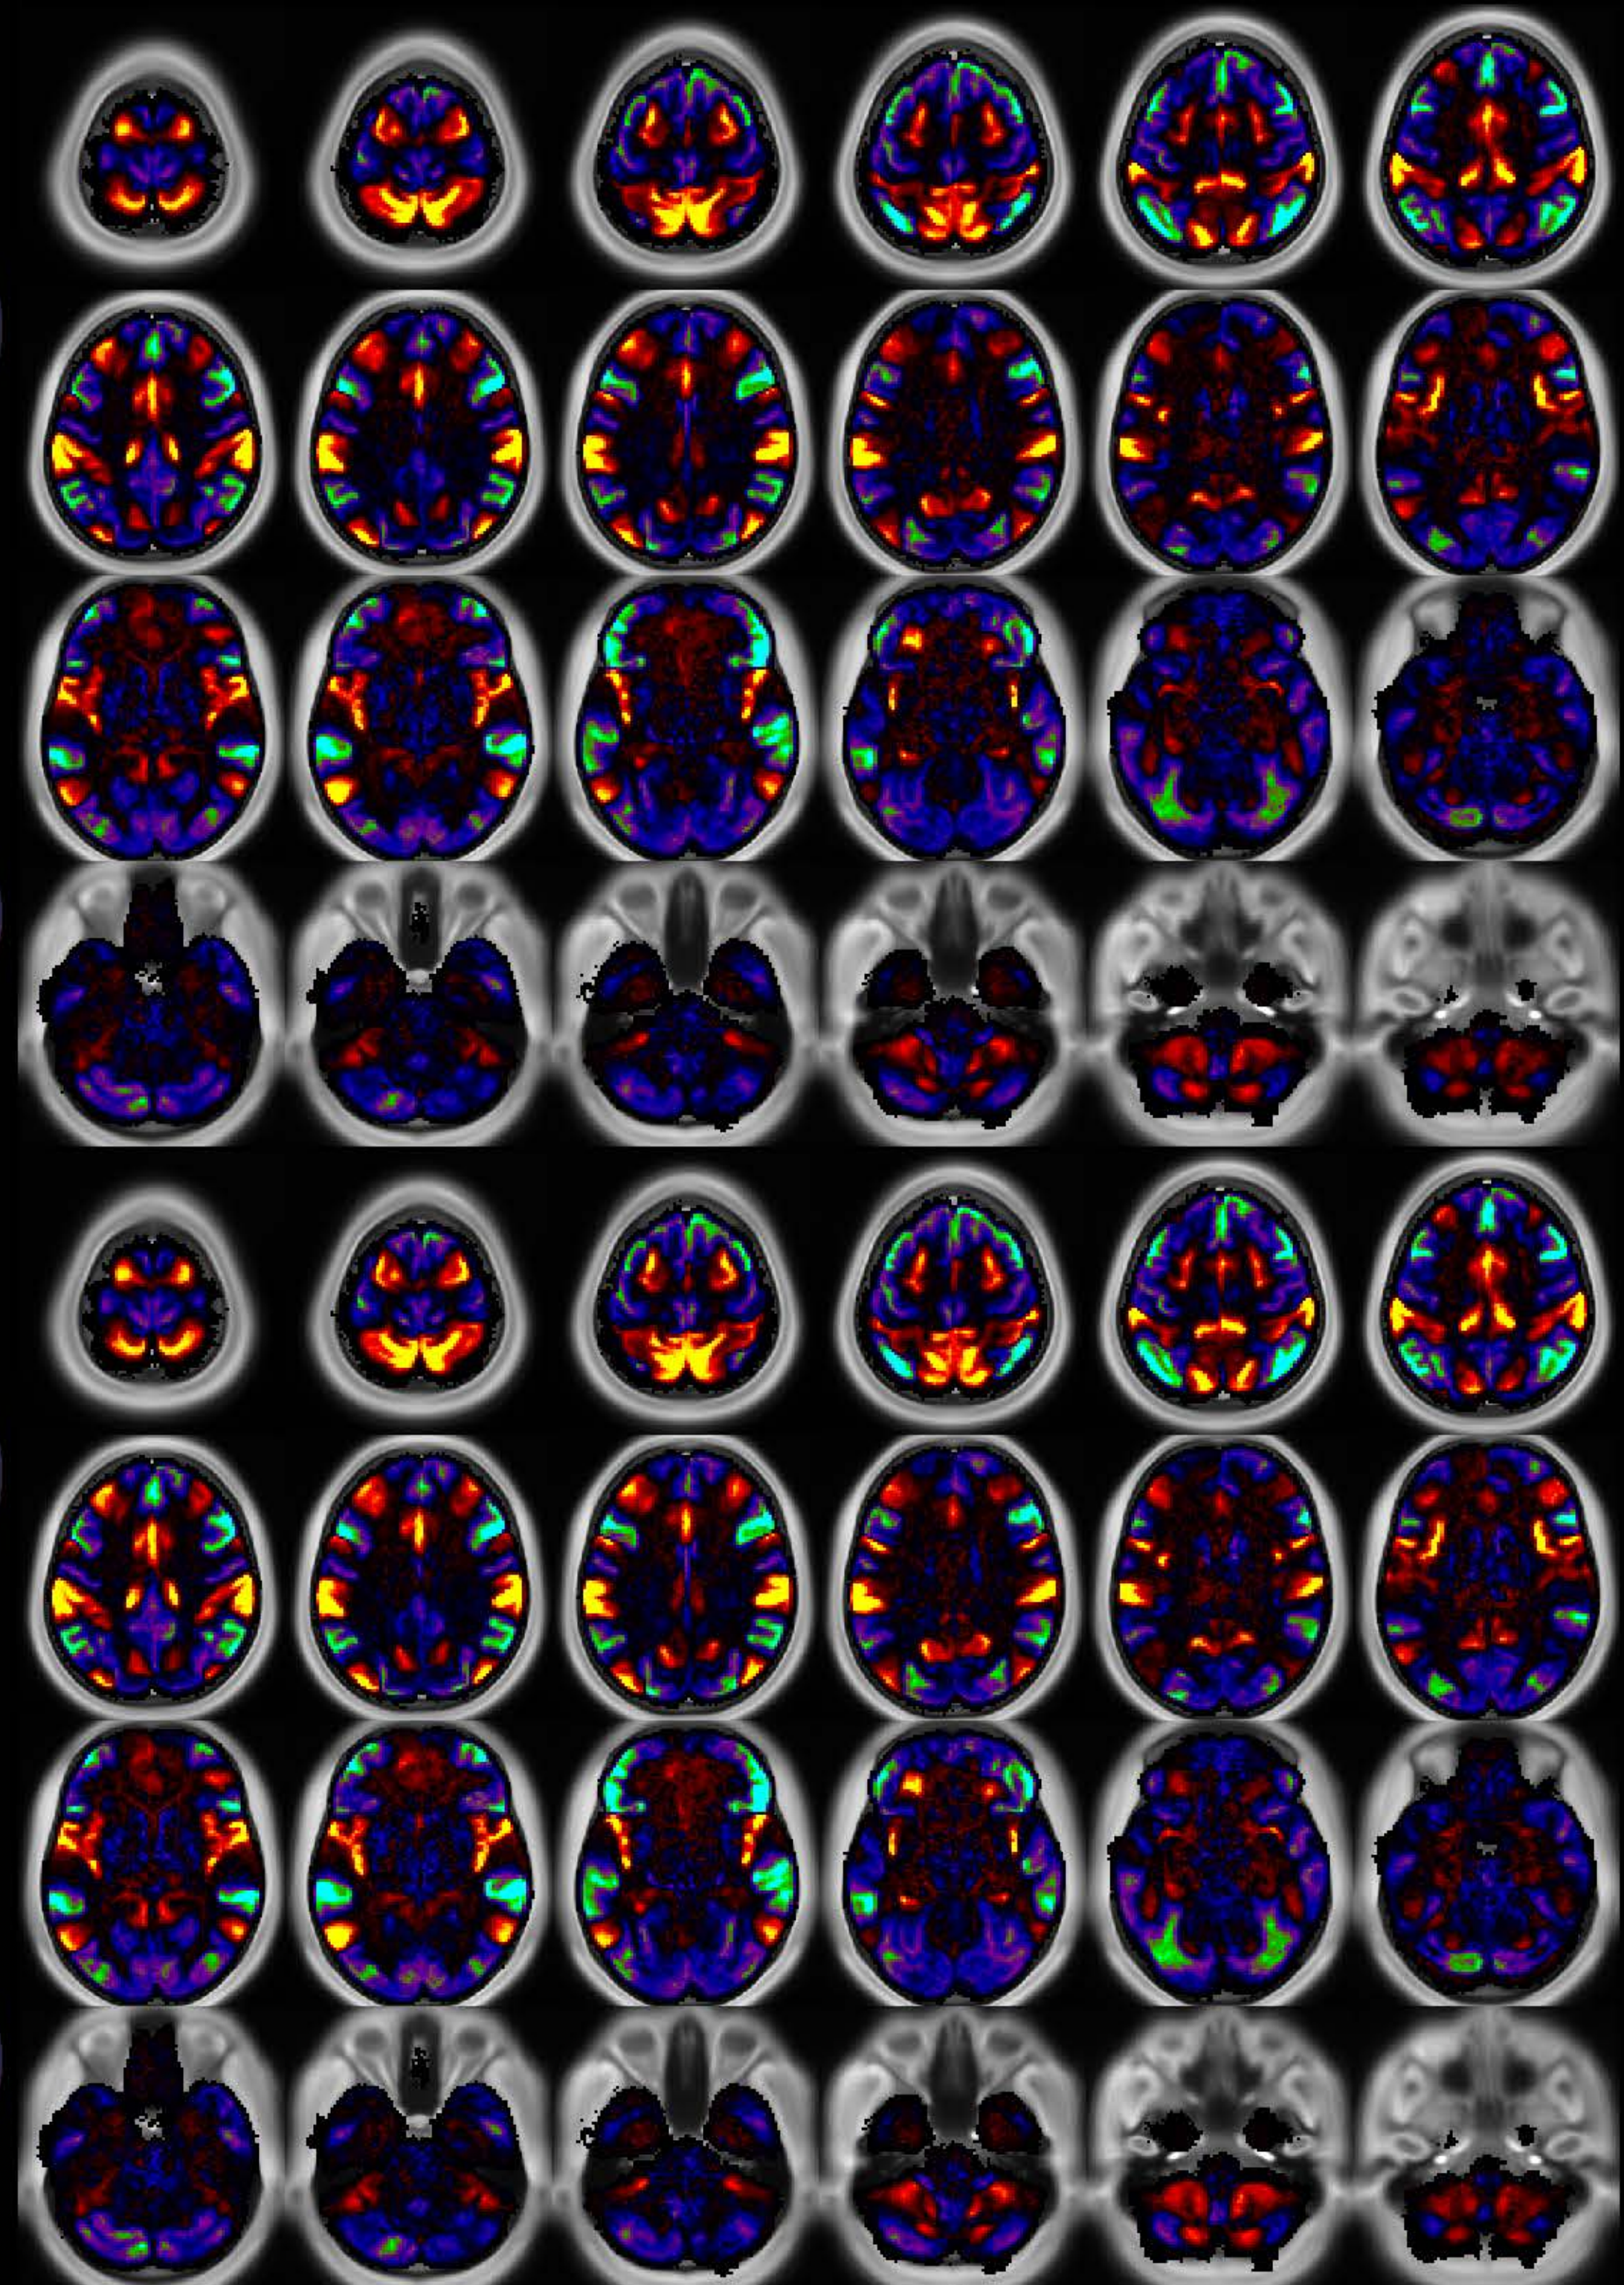

Seconds

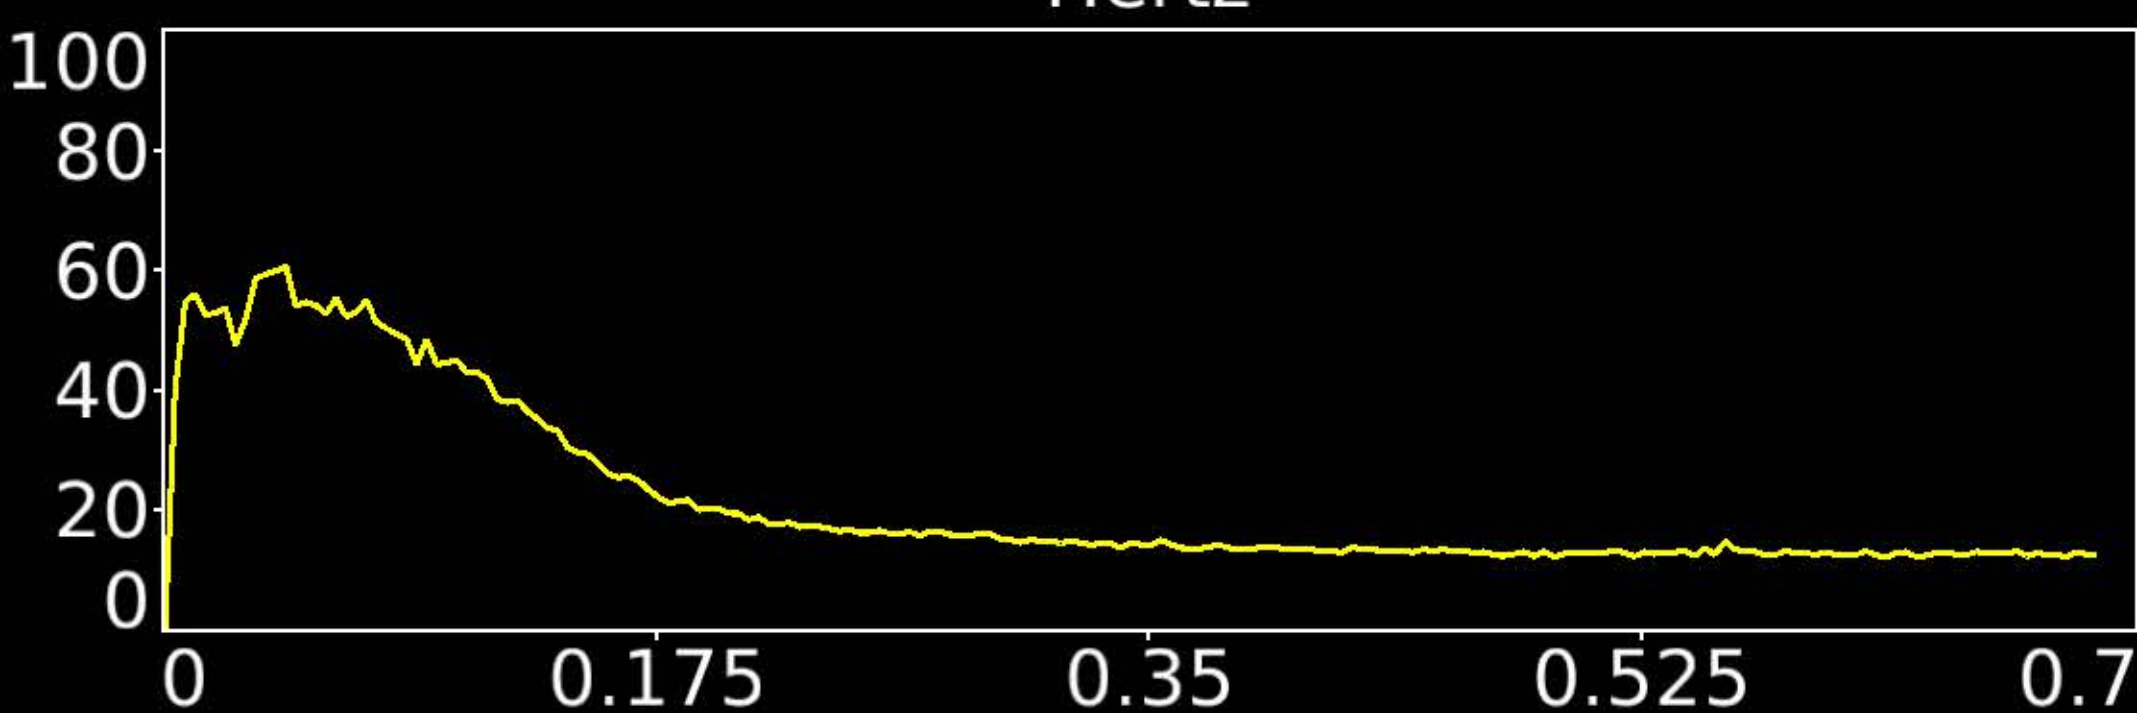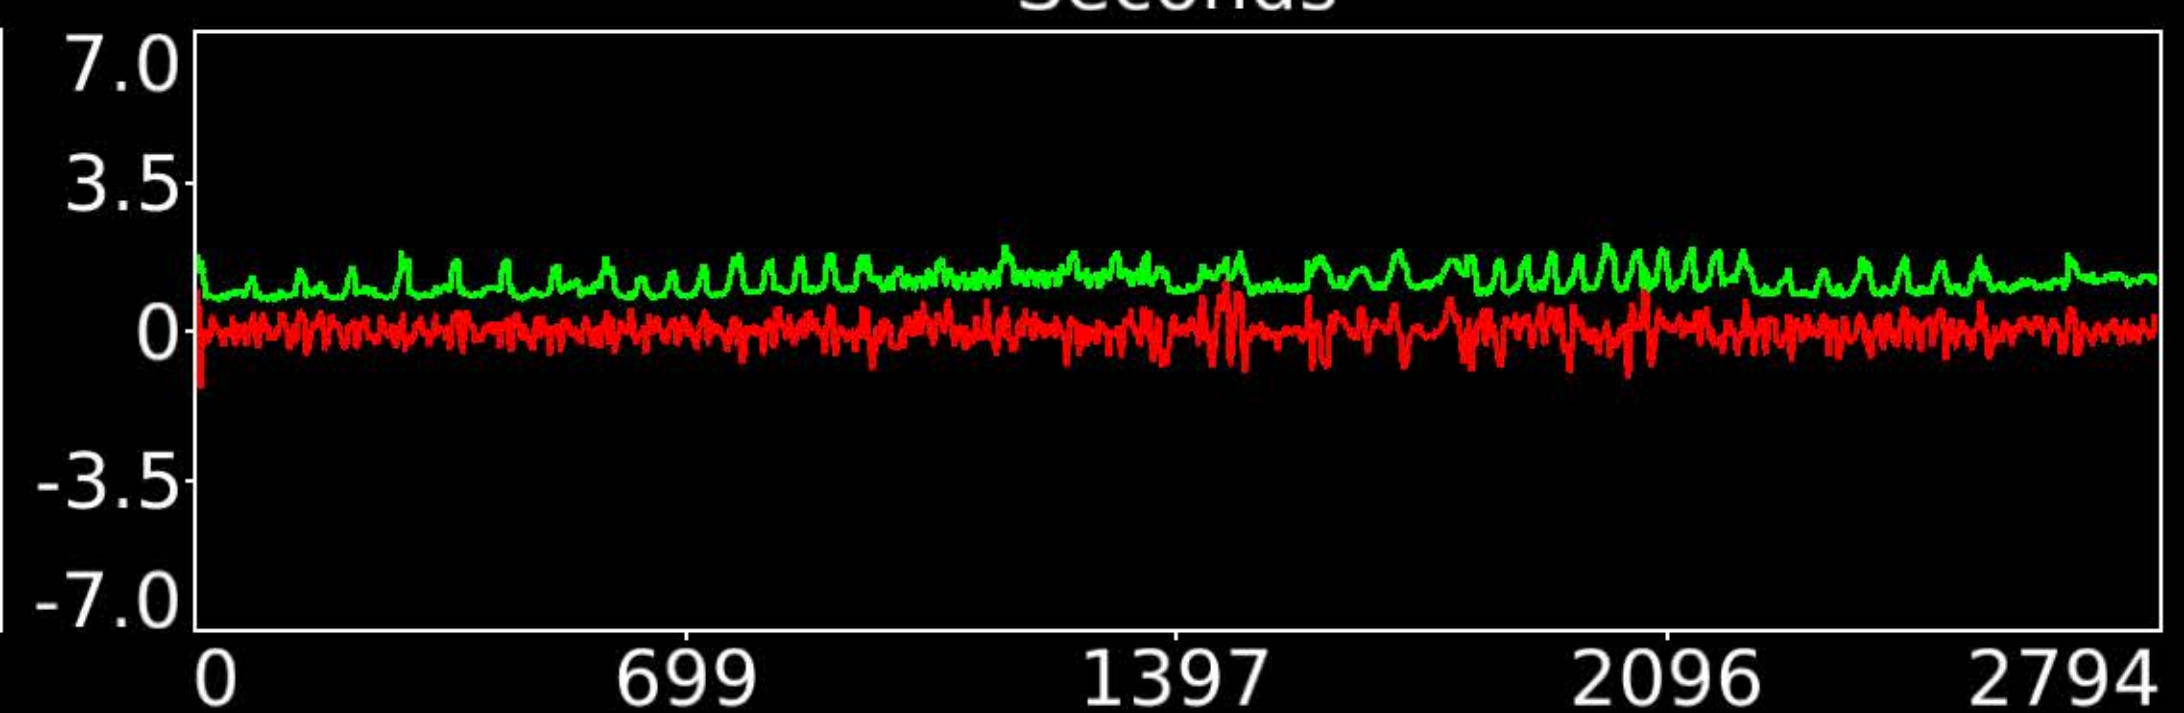

|                          |                           |                                 |  |
|--------------------------|---------------------------|---------------------------------|--|
| Number & Class: 9 Signal |                           | Name: Cingulo-Opercular Network |  |
| RVT Correlated: No       | DVARS Dip Associated: No  | Cross-Subject Variable: No      |  |
| Single Subject: No       | % Variance Explained: 2.8 | Globality Index: 0.57           |  |
| Task Component: 10       | Rest Component: 13        | Task Modulated: No              |  |

Rationale: Spatial map includes positive and negative patches that respect known RSNs (e.g. Cingulo-Opercular Network)



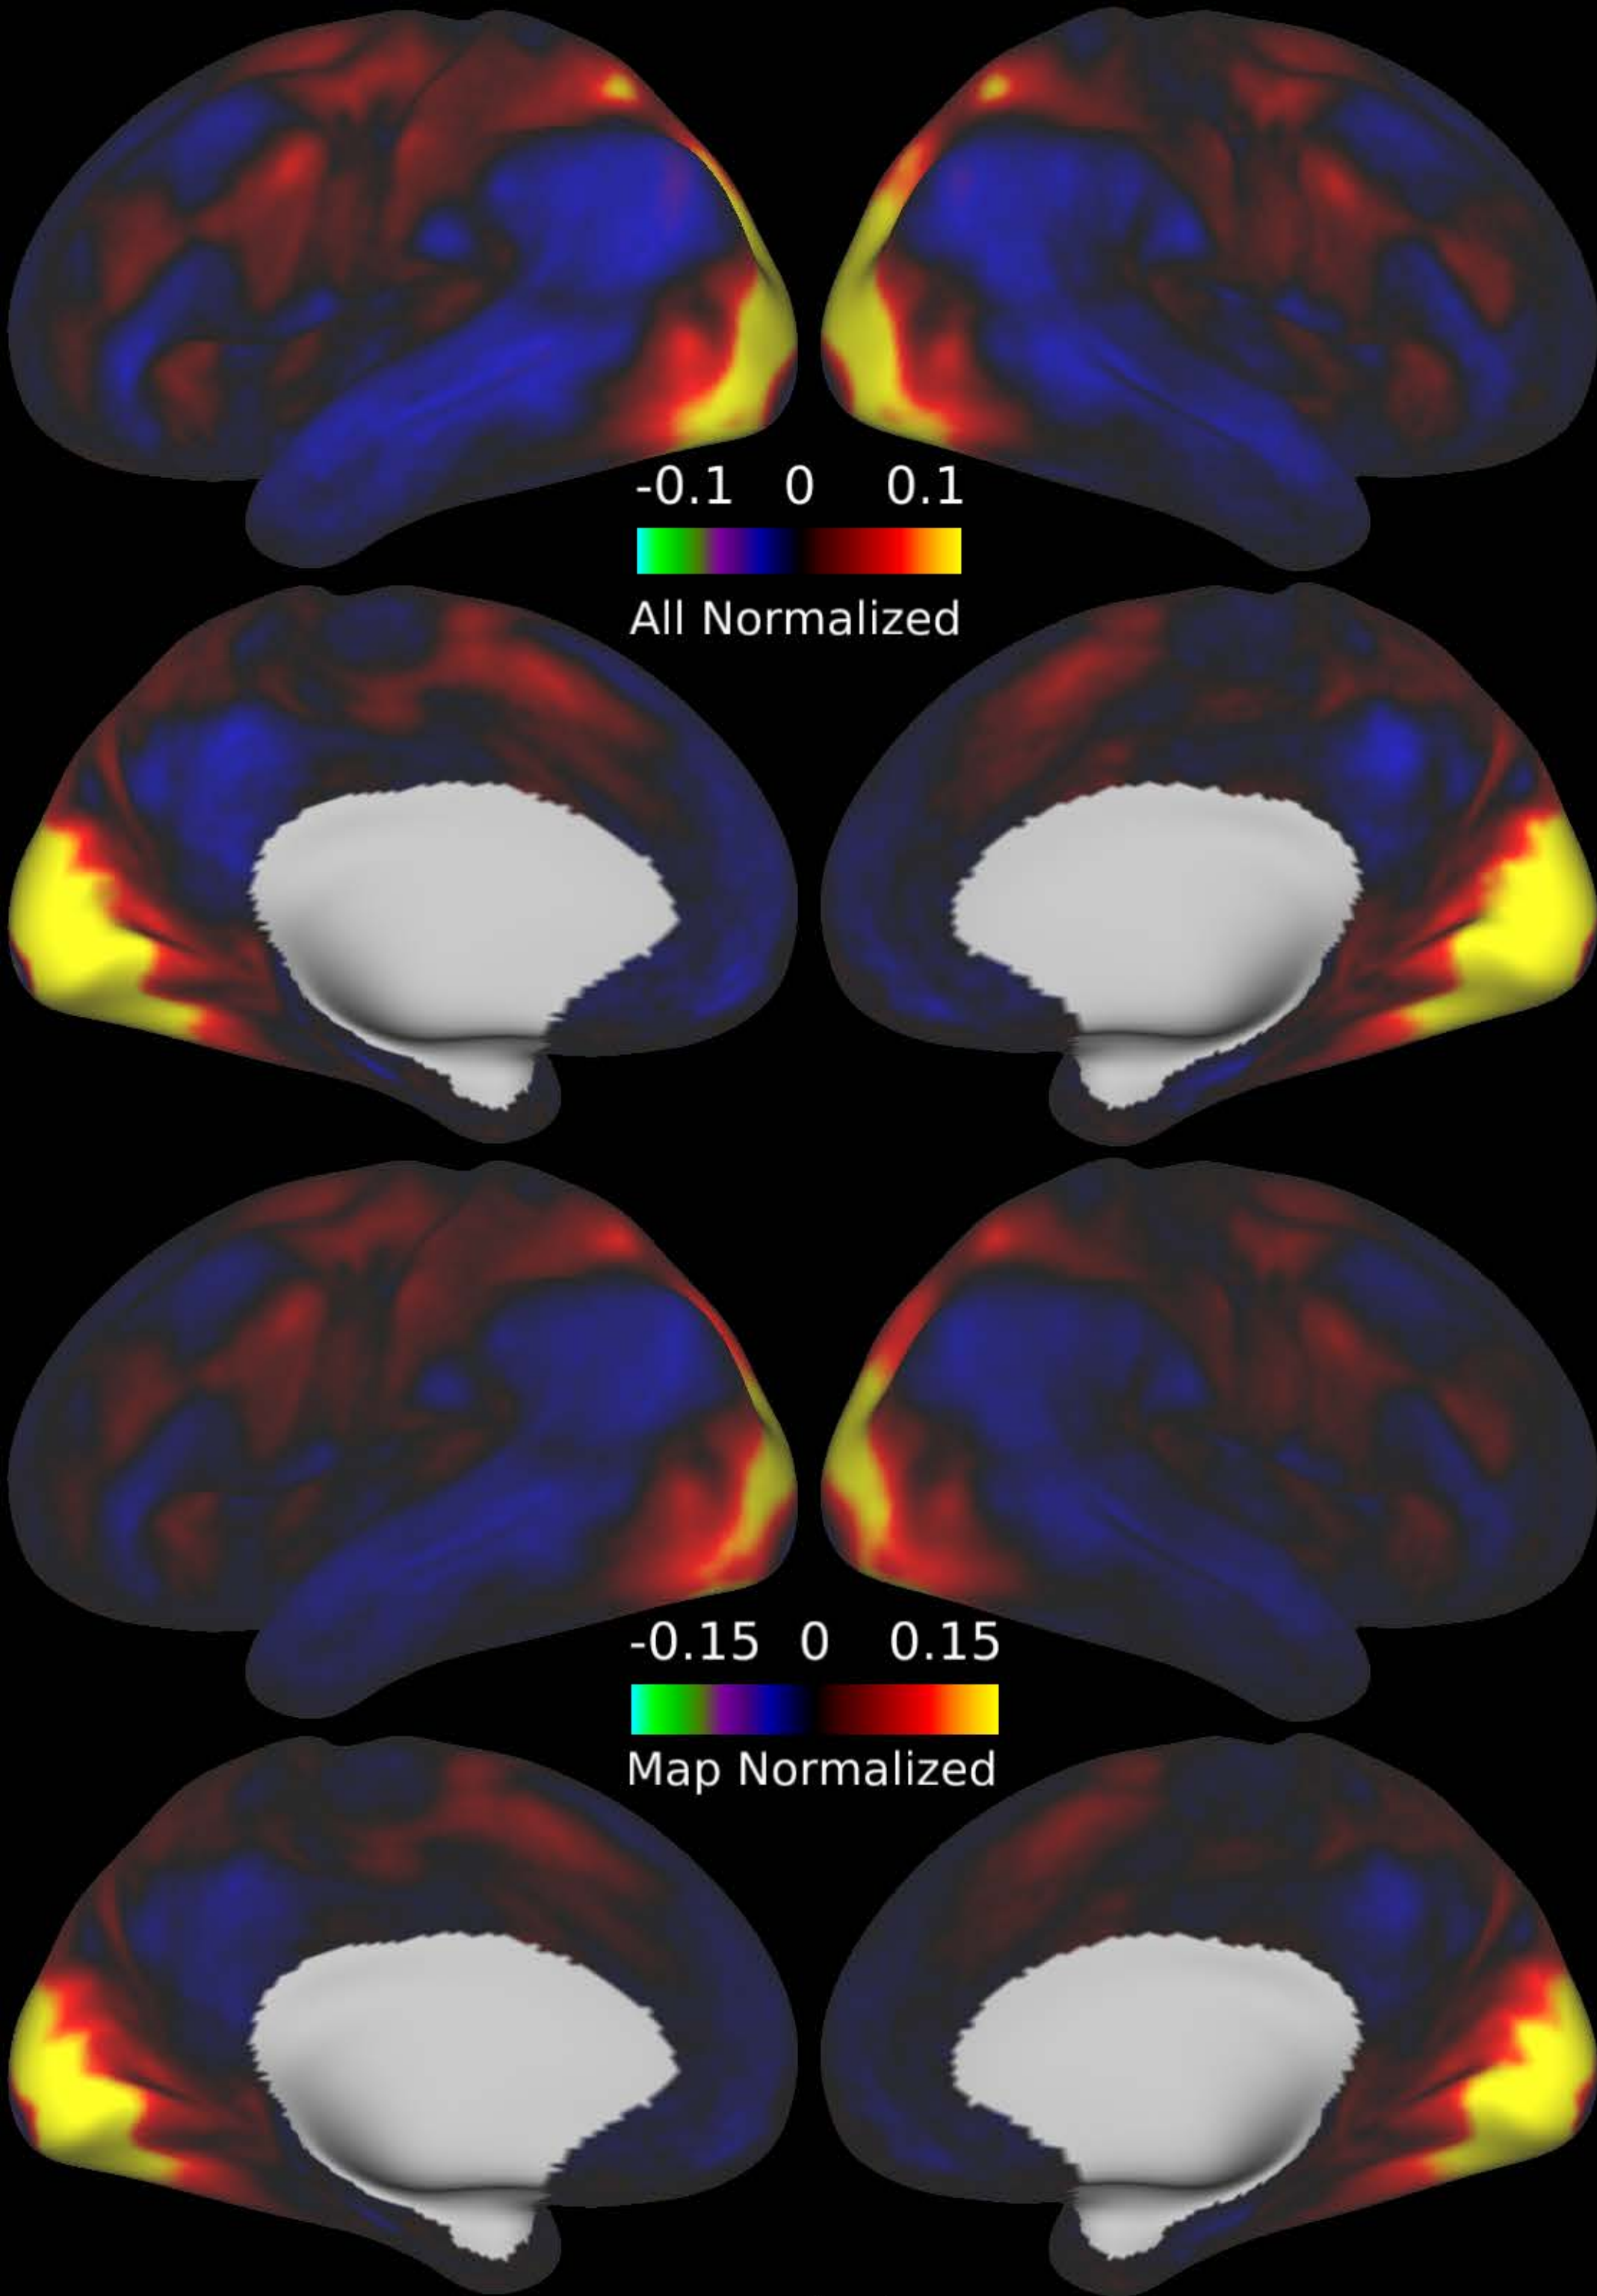

Hertz

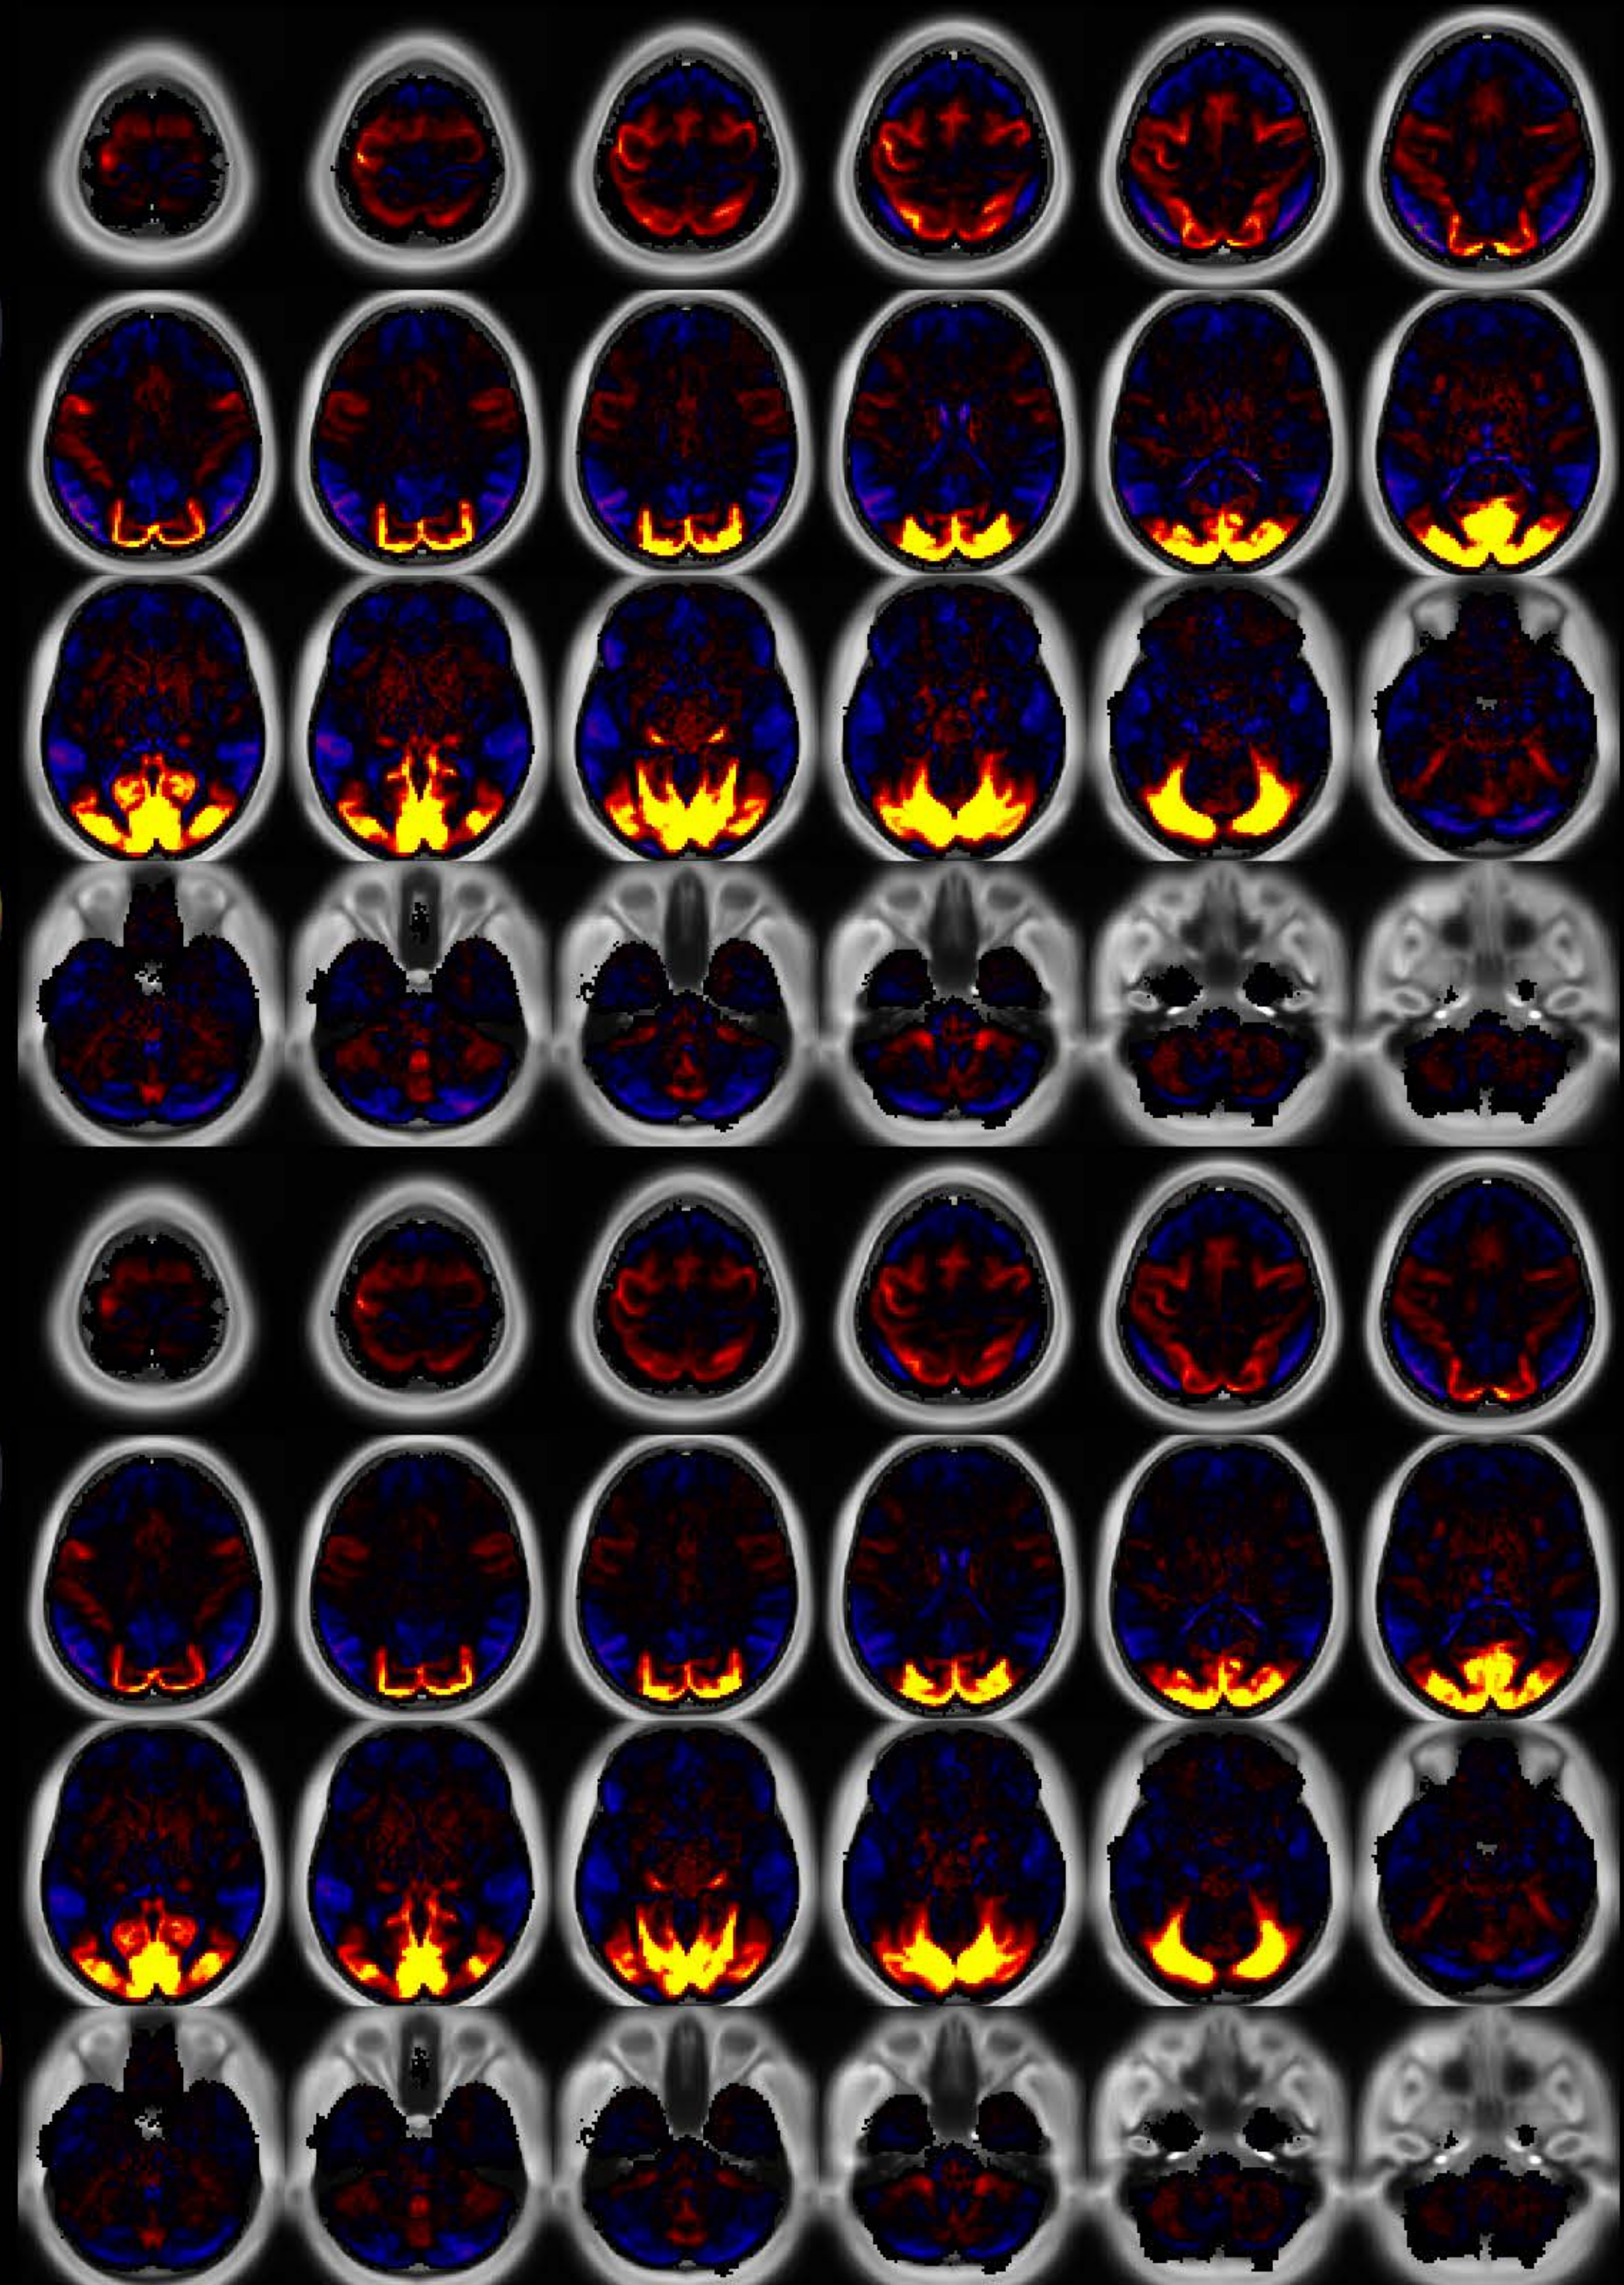

Seconds

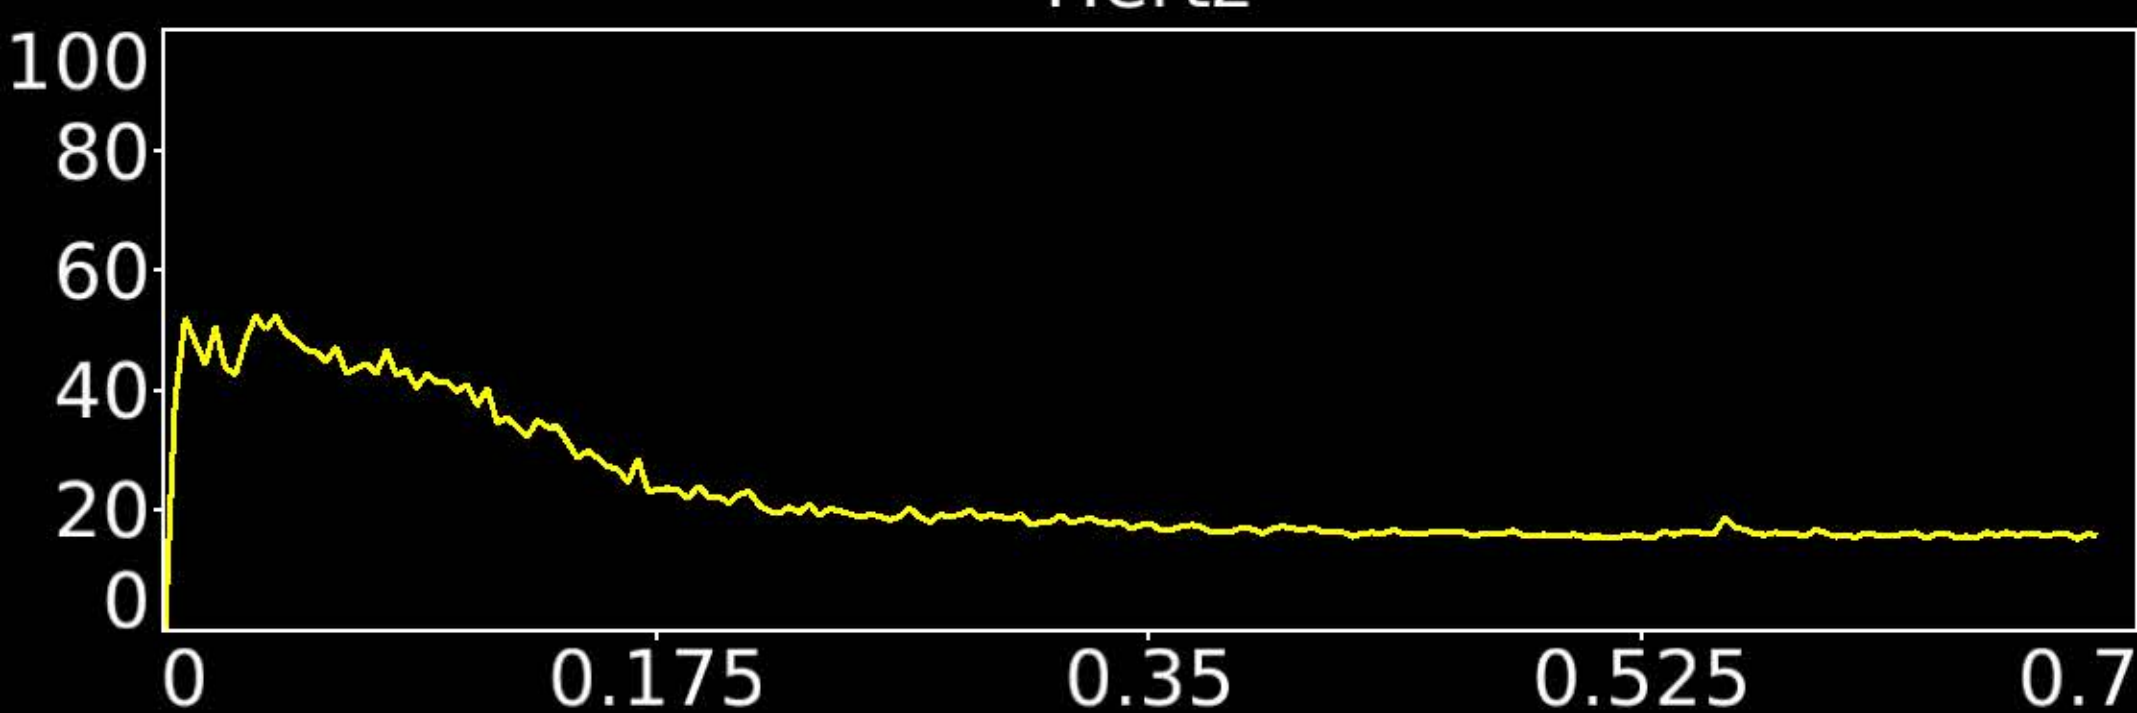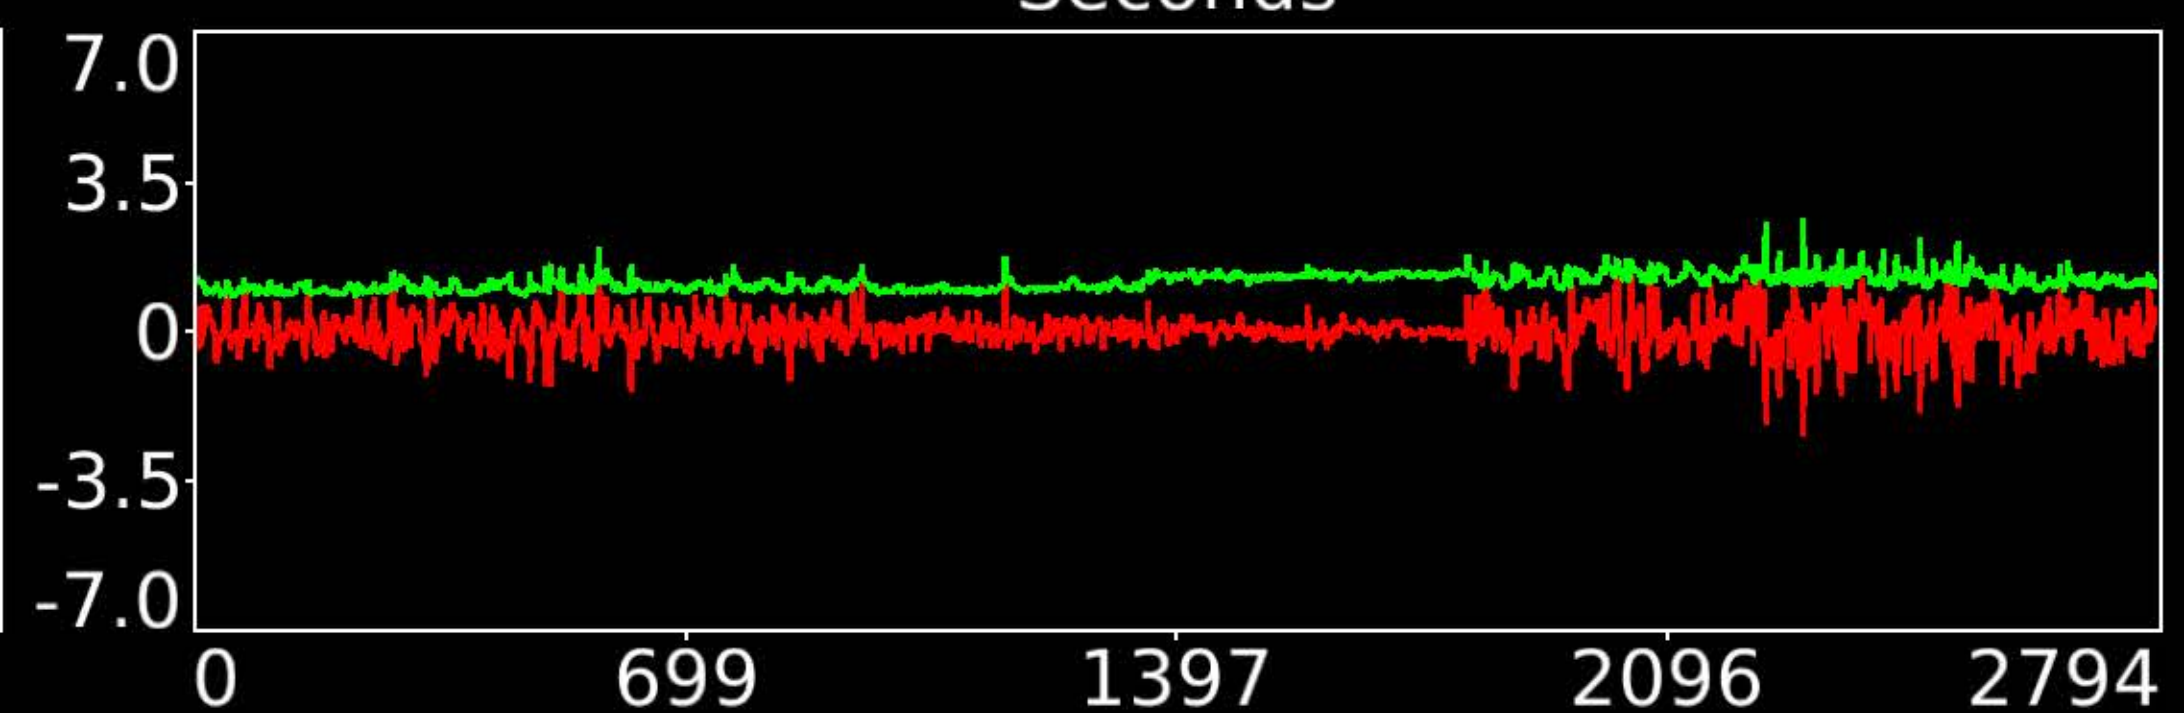

|                           |                           |                                |  |
|---------------------------|---------------------------|--------------------------------|--|
| Number & Class: 10 Signal |                           | Name: Pan-Visual (Paracentral) |  |
| RVT Correlated: No        | DVARS Dip Associated: No  | Cross-Subject Variable: No     |  |
| Single Subject: No        | % Variance Explained: 2.6 | Globality Index: 0.19          |  |
| Task Component: 3+17      | Rest Component: No        | Task Modulated: No             |  |

Rationale: Spatial map includes positive and negative patches that respect known retinotopic visual organization (Paracentral vs Foveal and Peripheral)



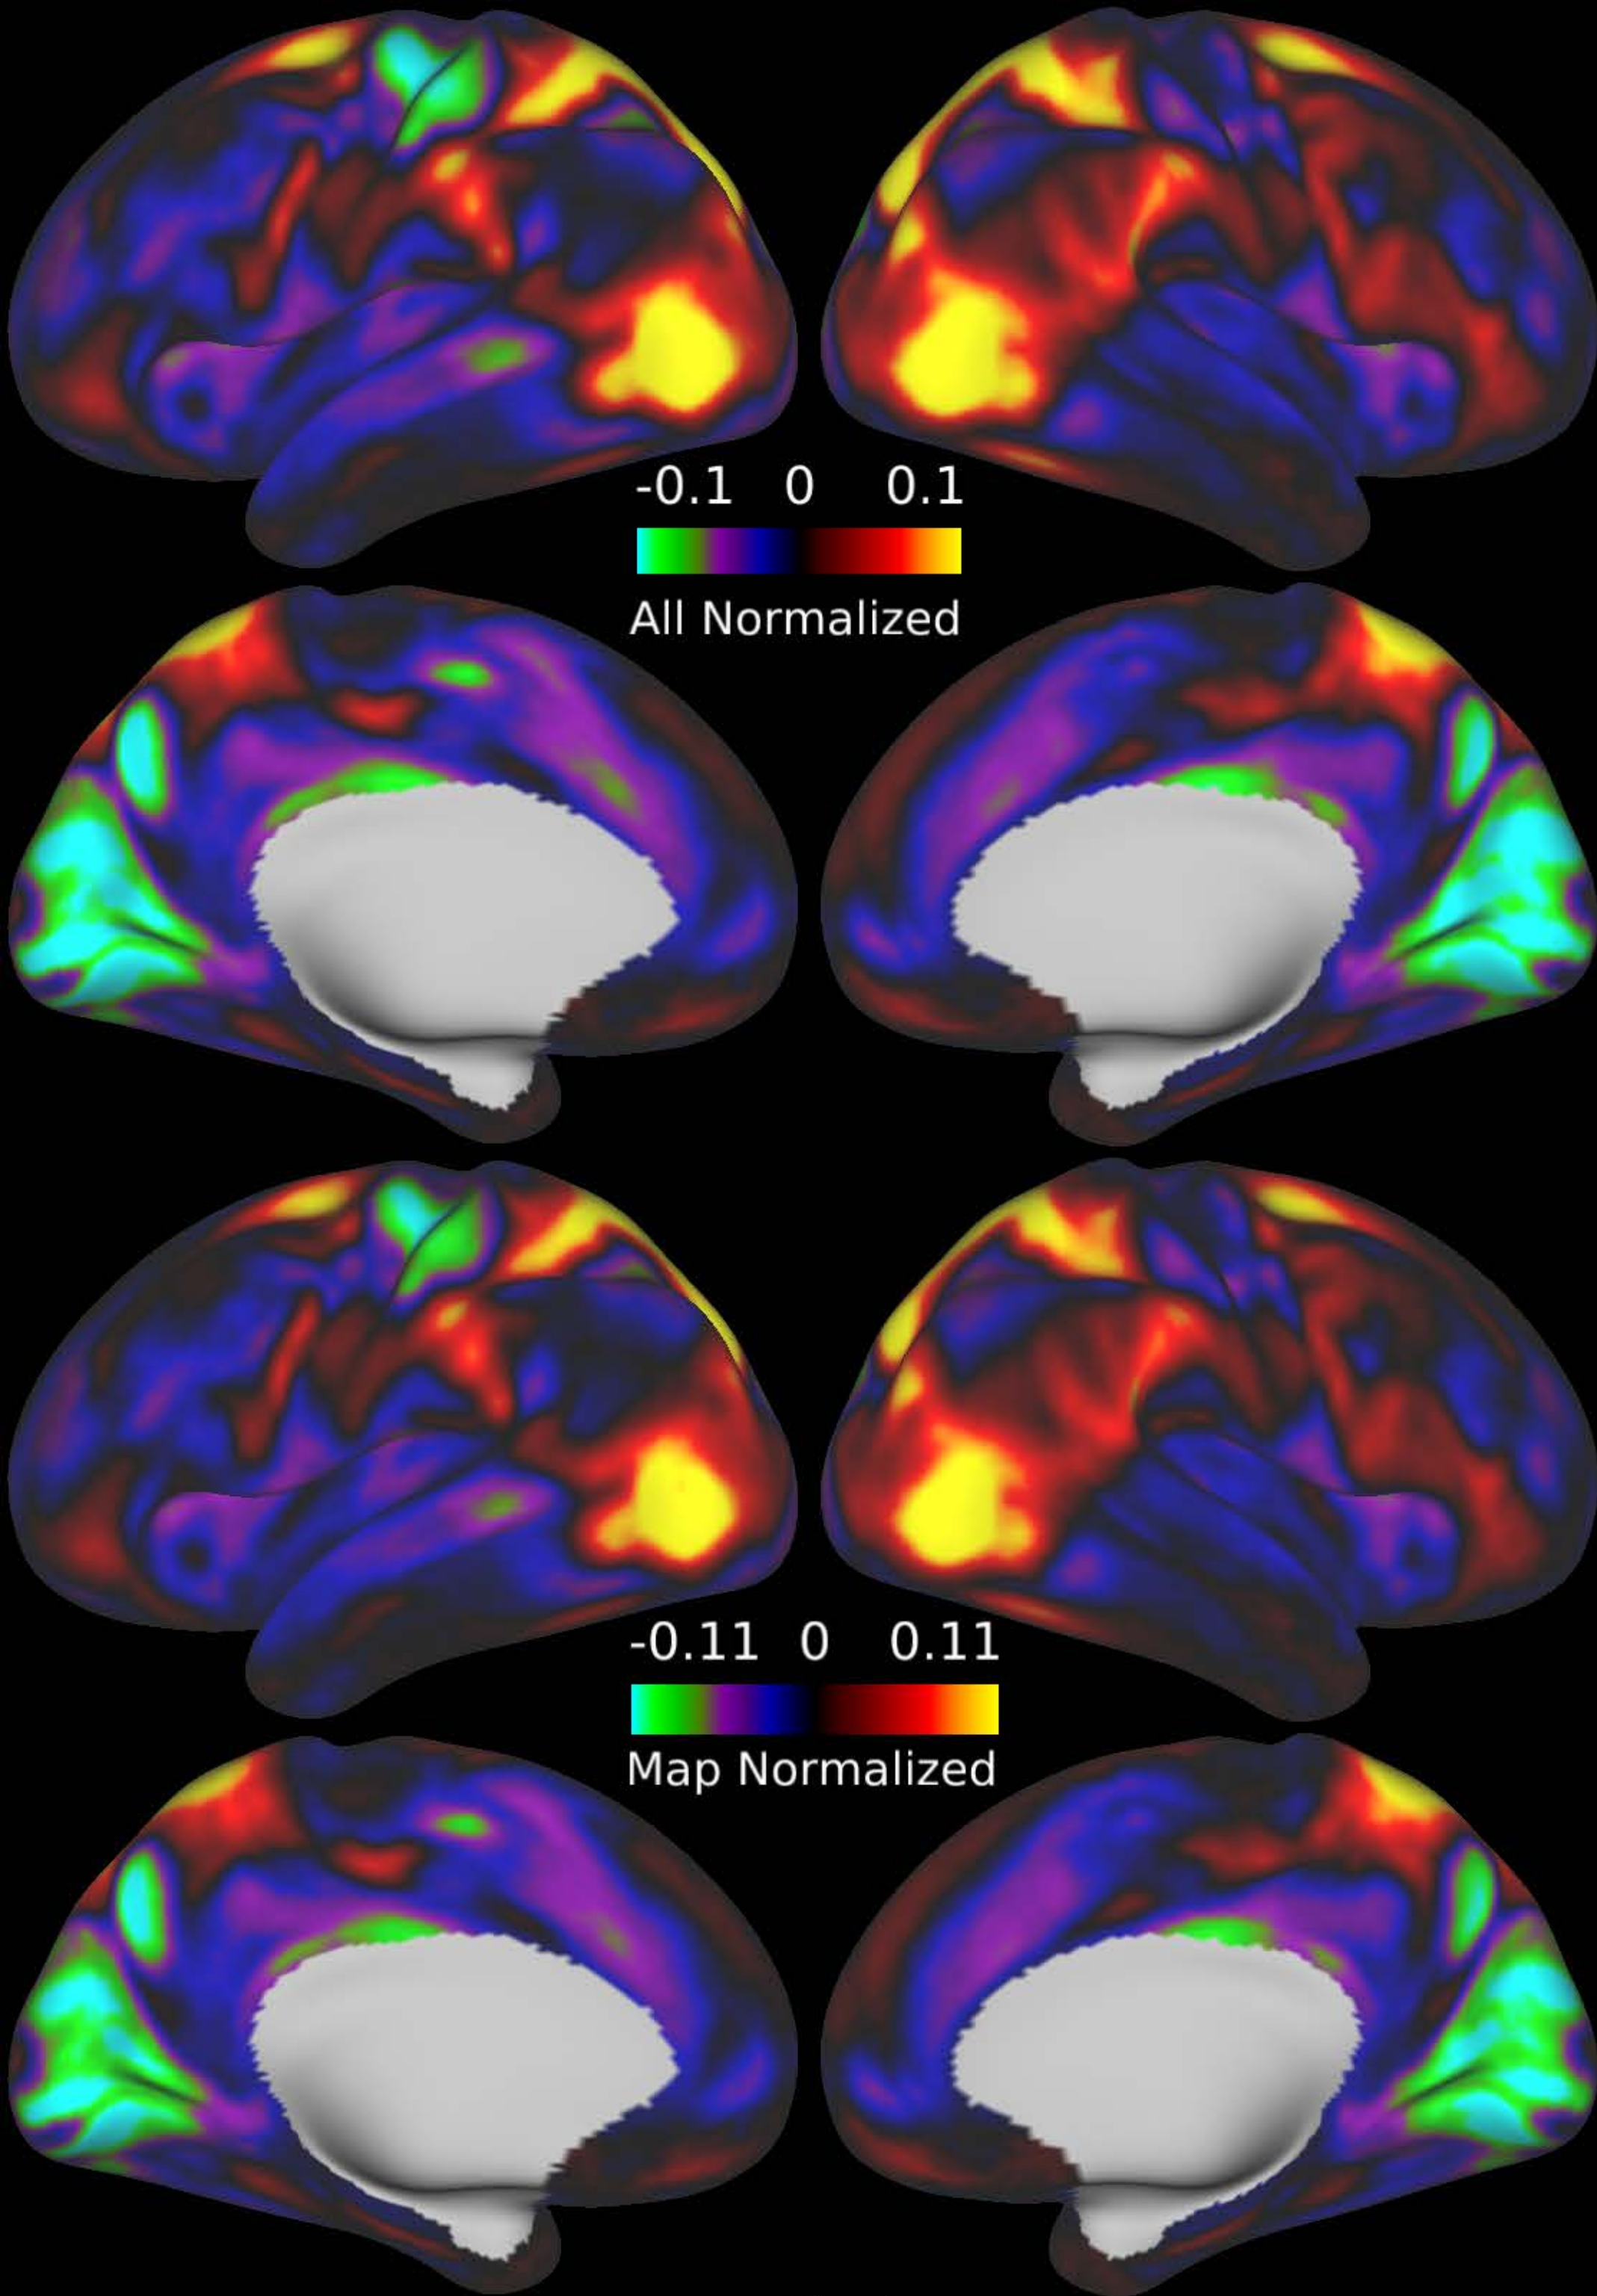

Hertz

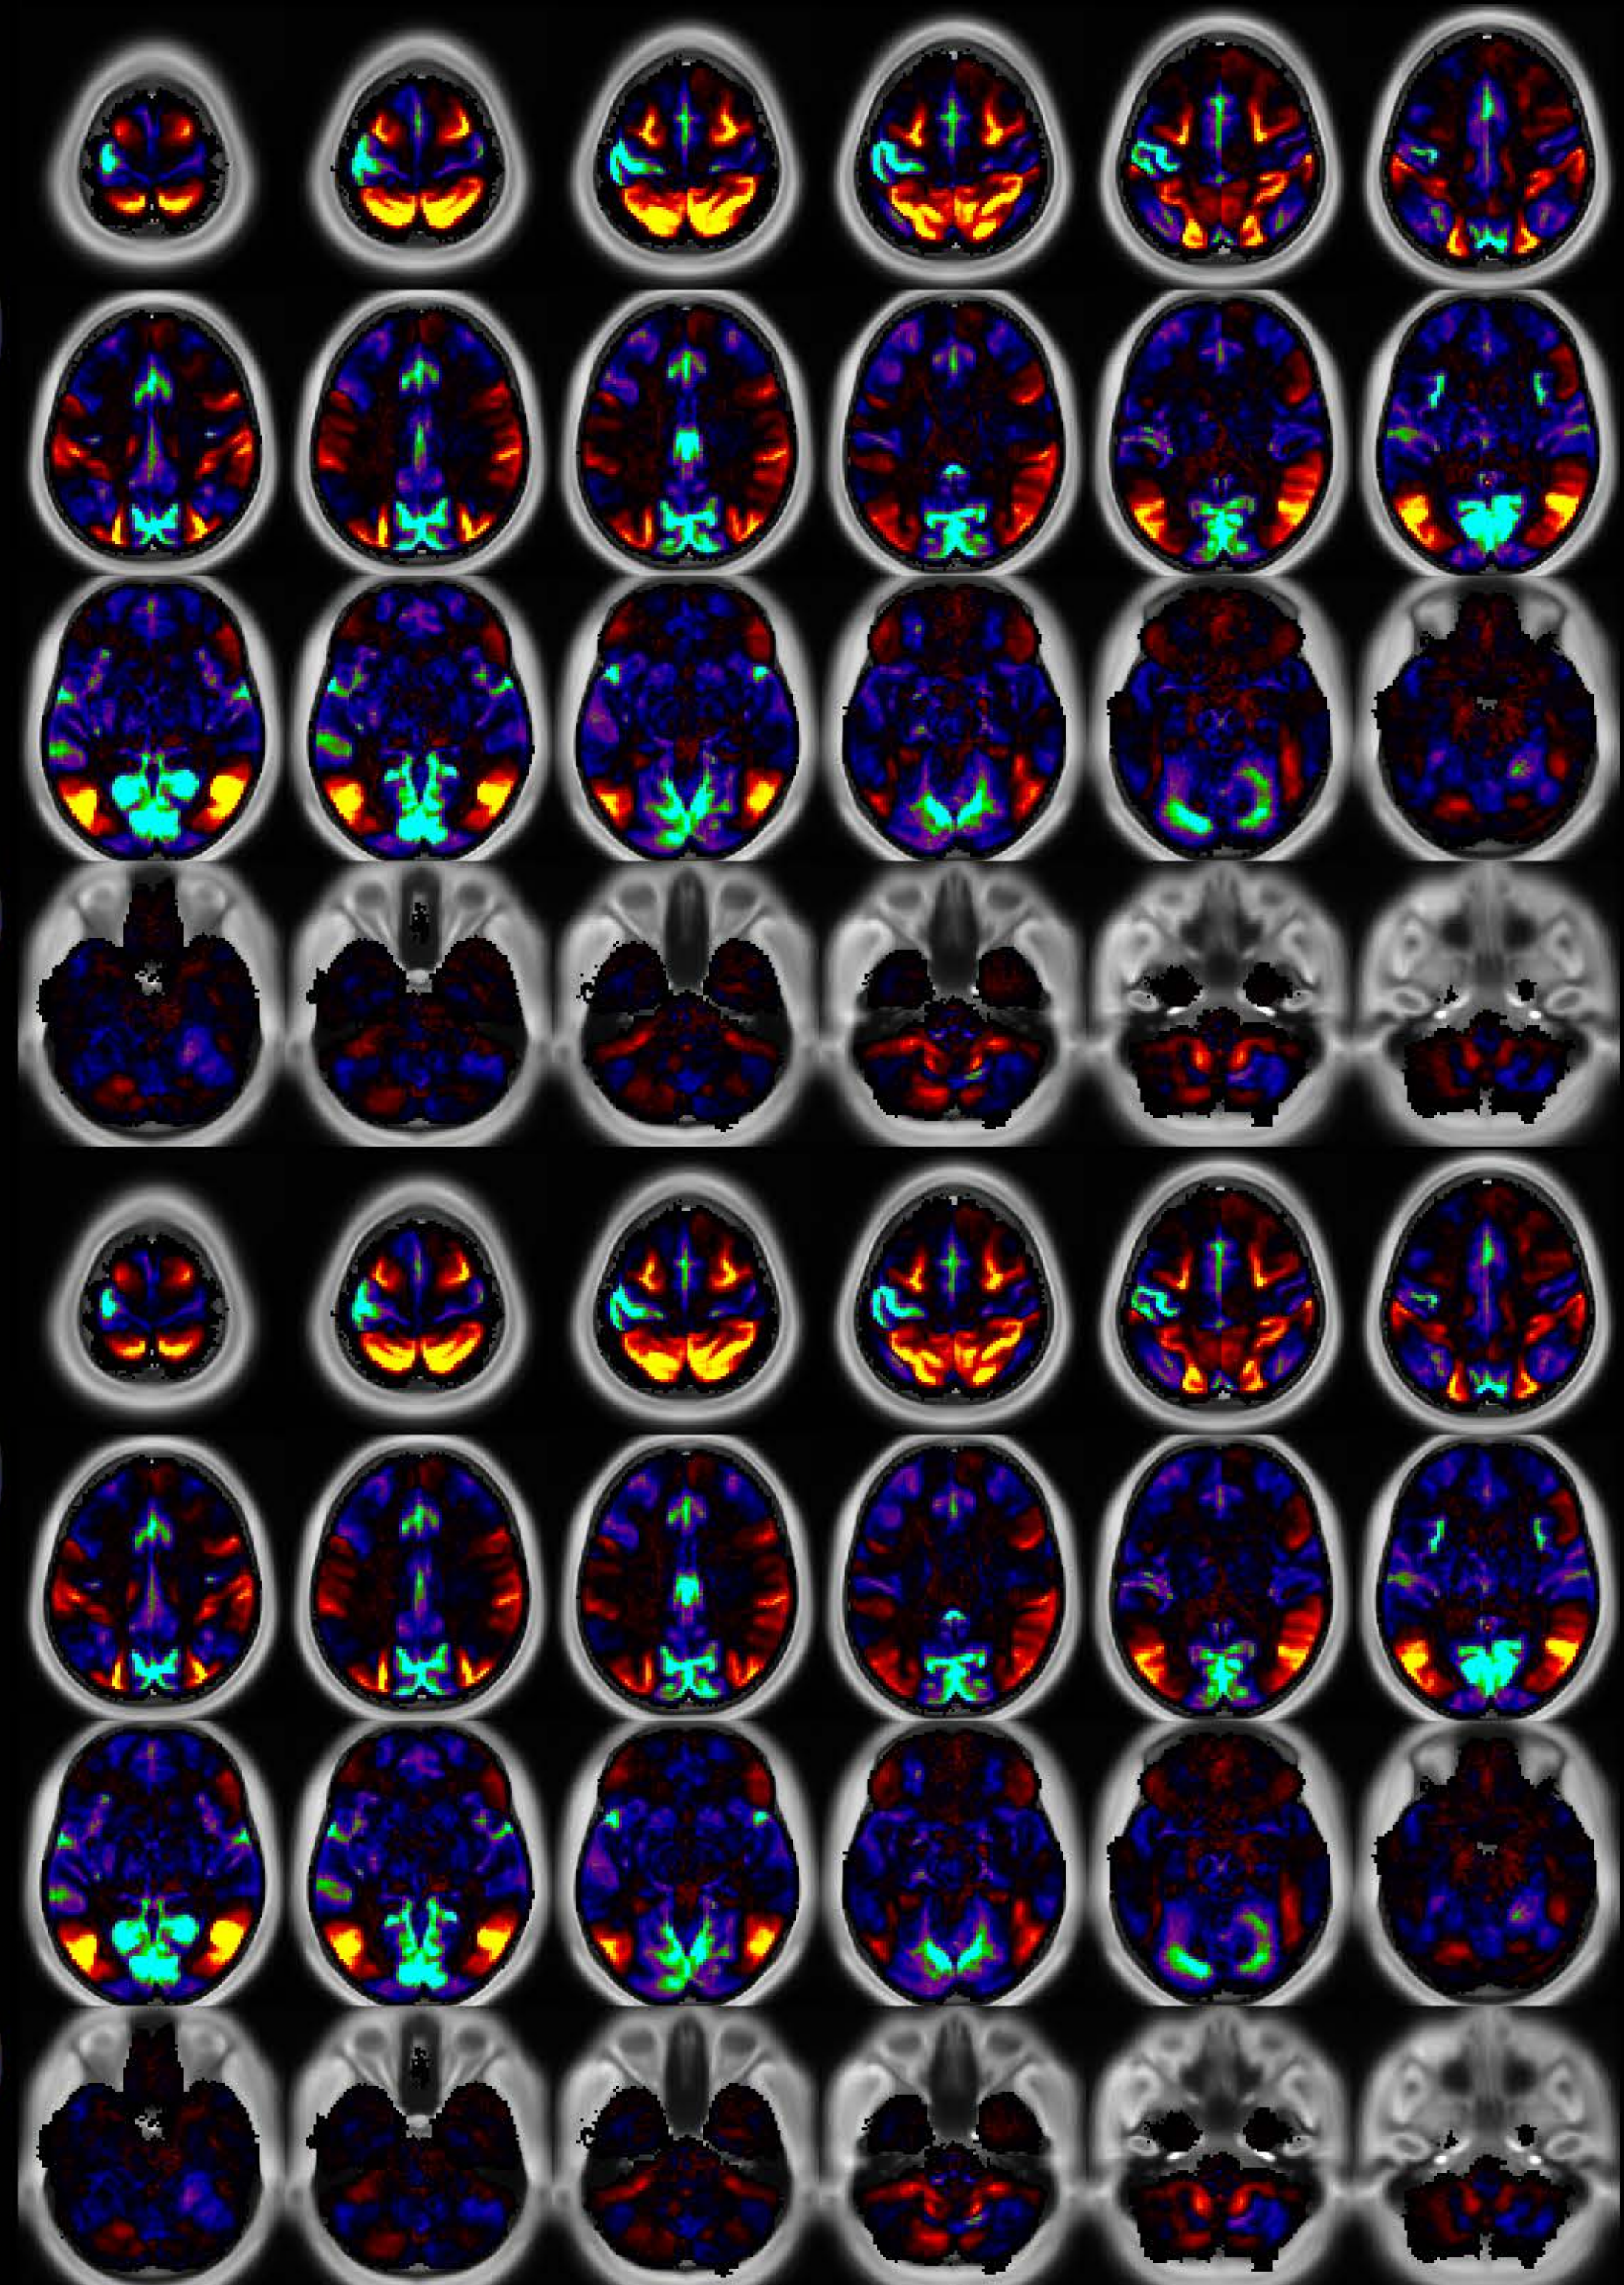

Seconds

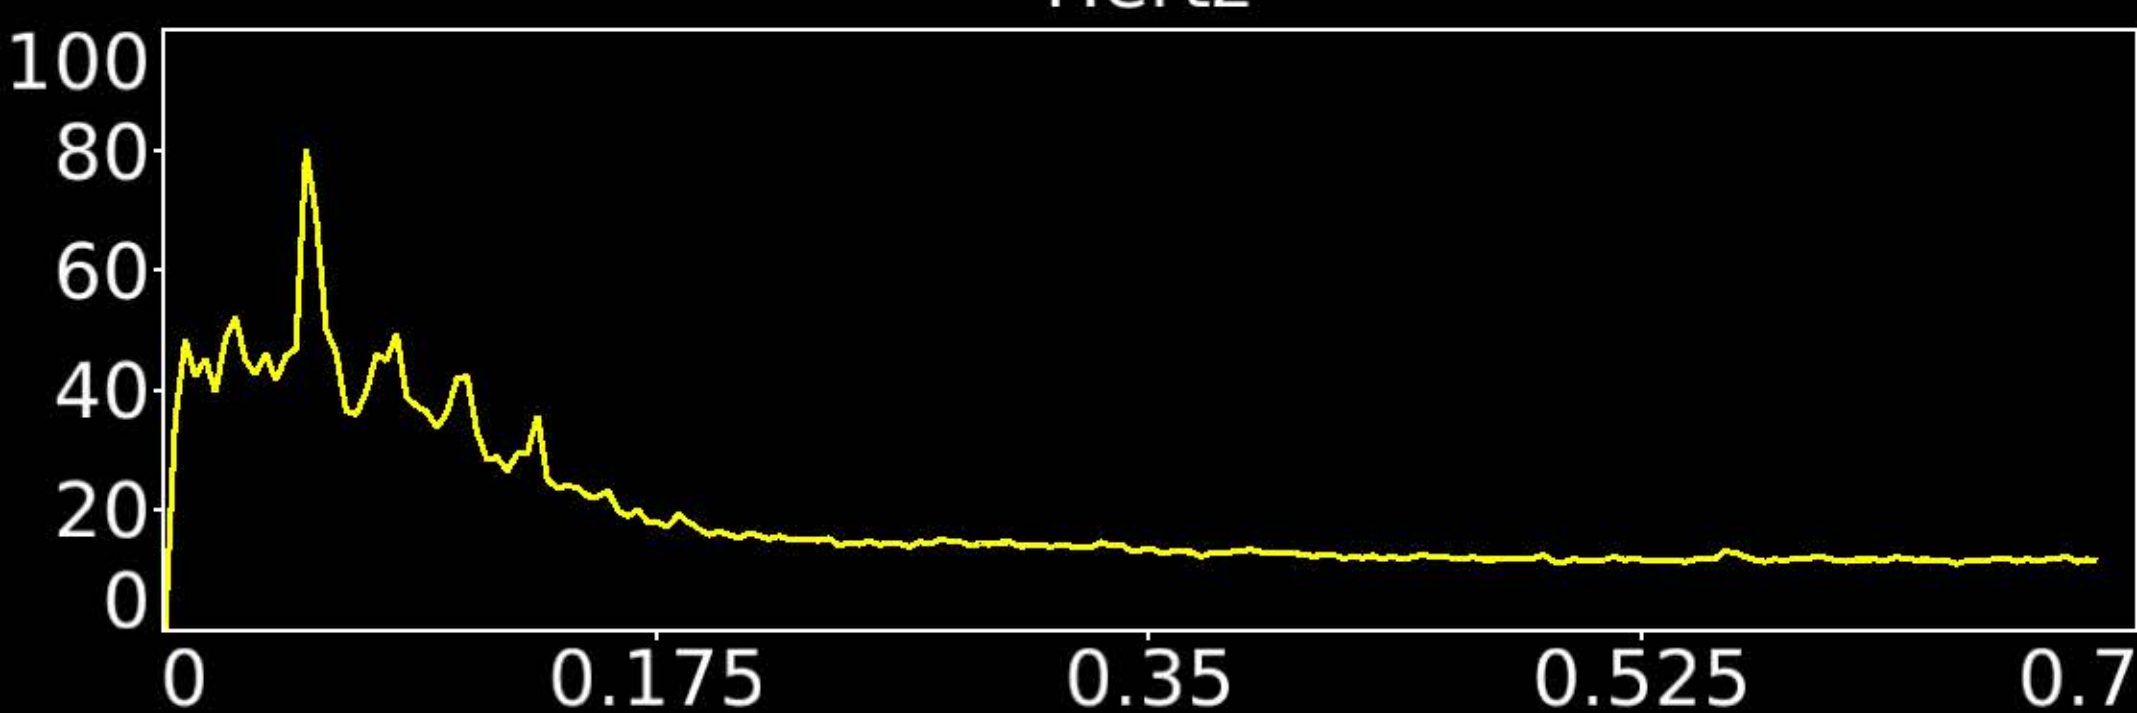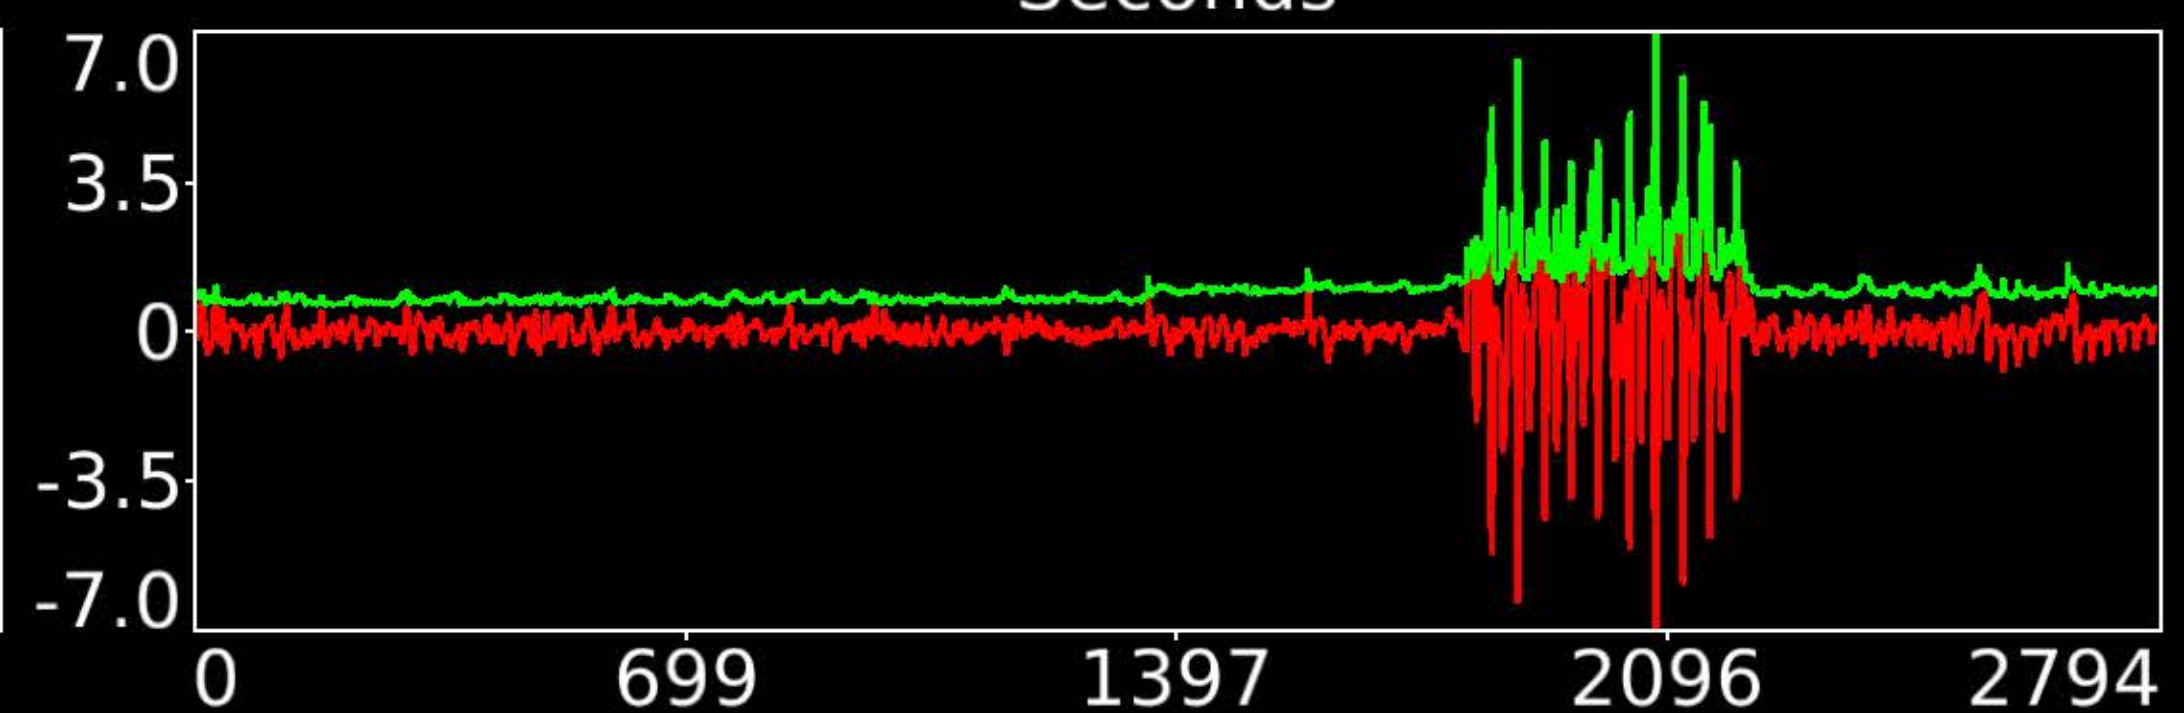

|                                                                                                               |                            |                              |  |
|---------------------------------------------------------------------------------------------------------------|----------------------------|------------------------------|--|
| Number & Class: 11 Signal                                                                                     |                            | Name: Residual Task (Social) |  |
| RVT Correlated: No                                                                                            | DVARS Dip Associated: No   | Cross-Subject Variable: No   |  |
| Single Subject: No                                                                                            | % Variance Explained: 2.53 | Globality Index: 0.72        |  |
| Task Component: 2                                                                                             | Rest Component: No         | Task Modulated: Social       |  |
| Rationale: Spatial map includes positive and negative patches that are correlated with a specific task design |                            |                              |  |



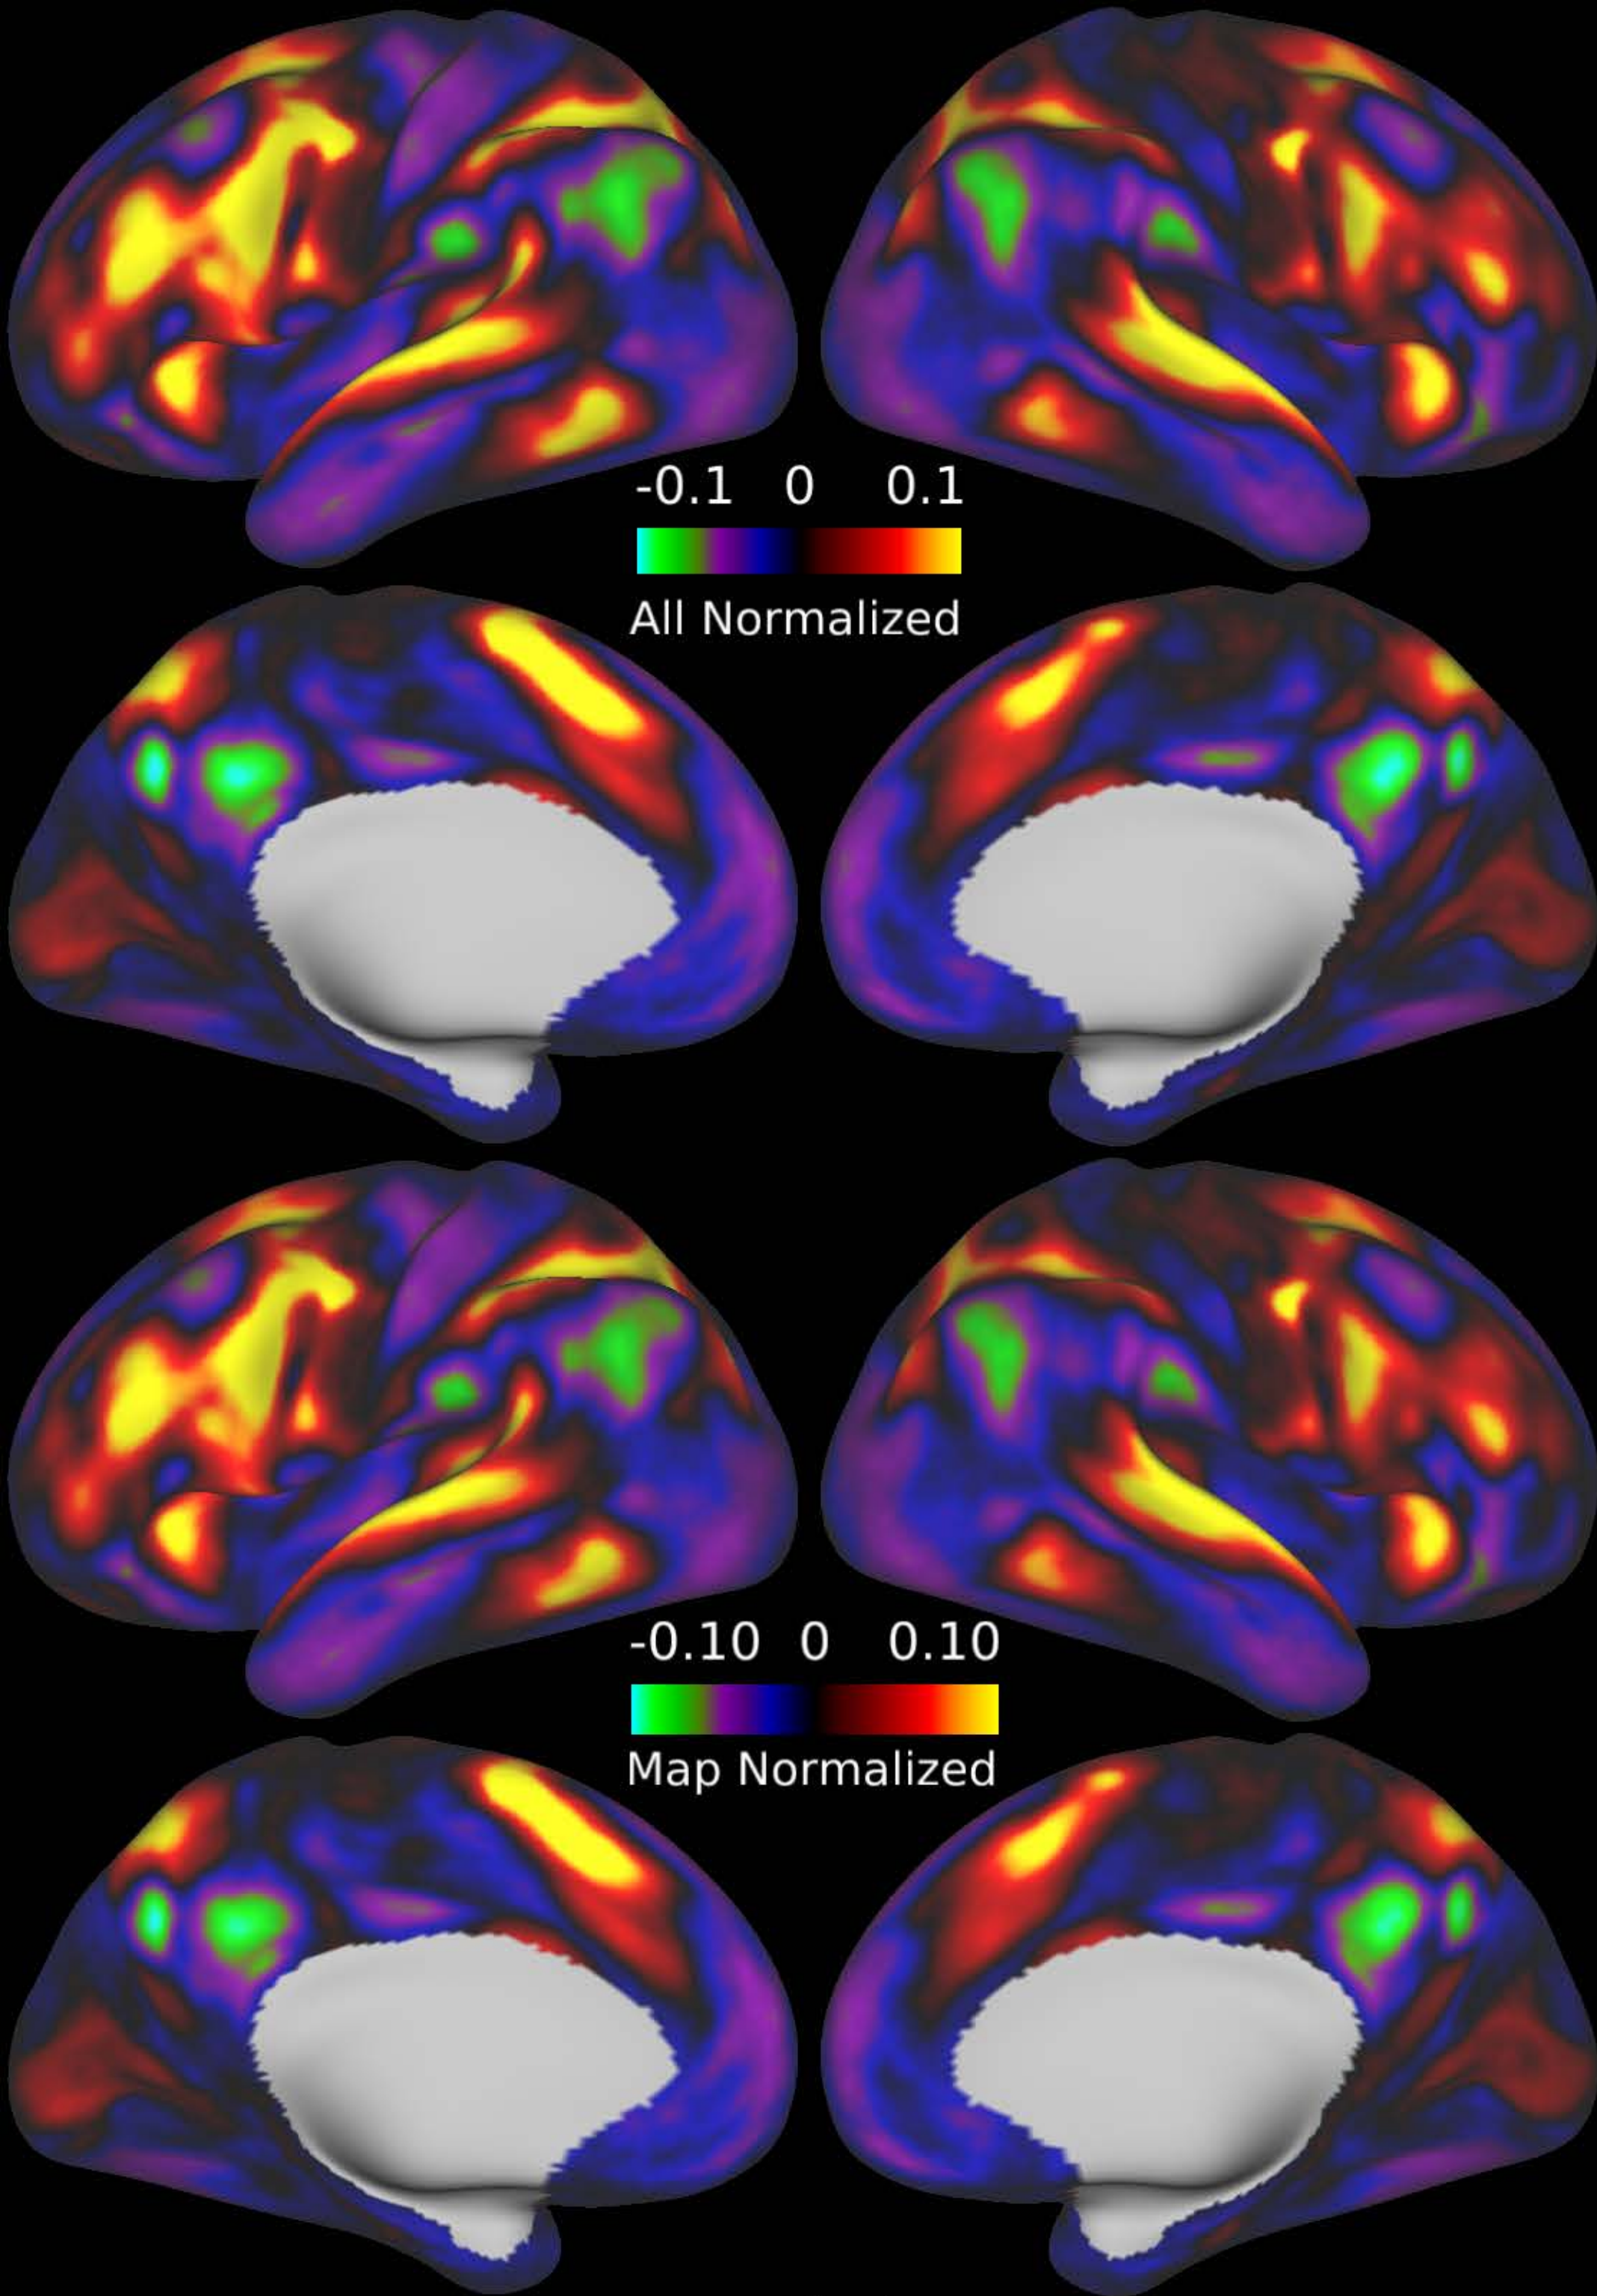

Hertz

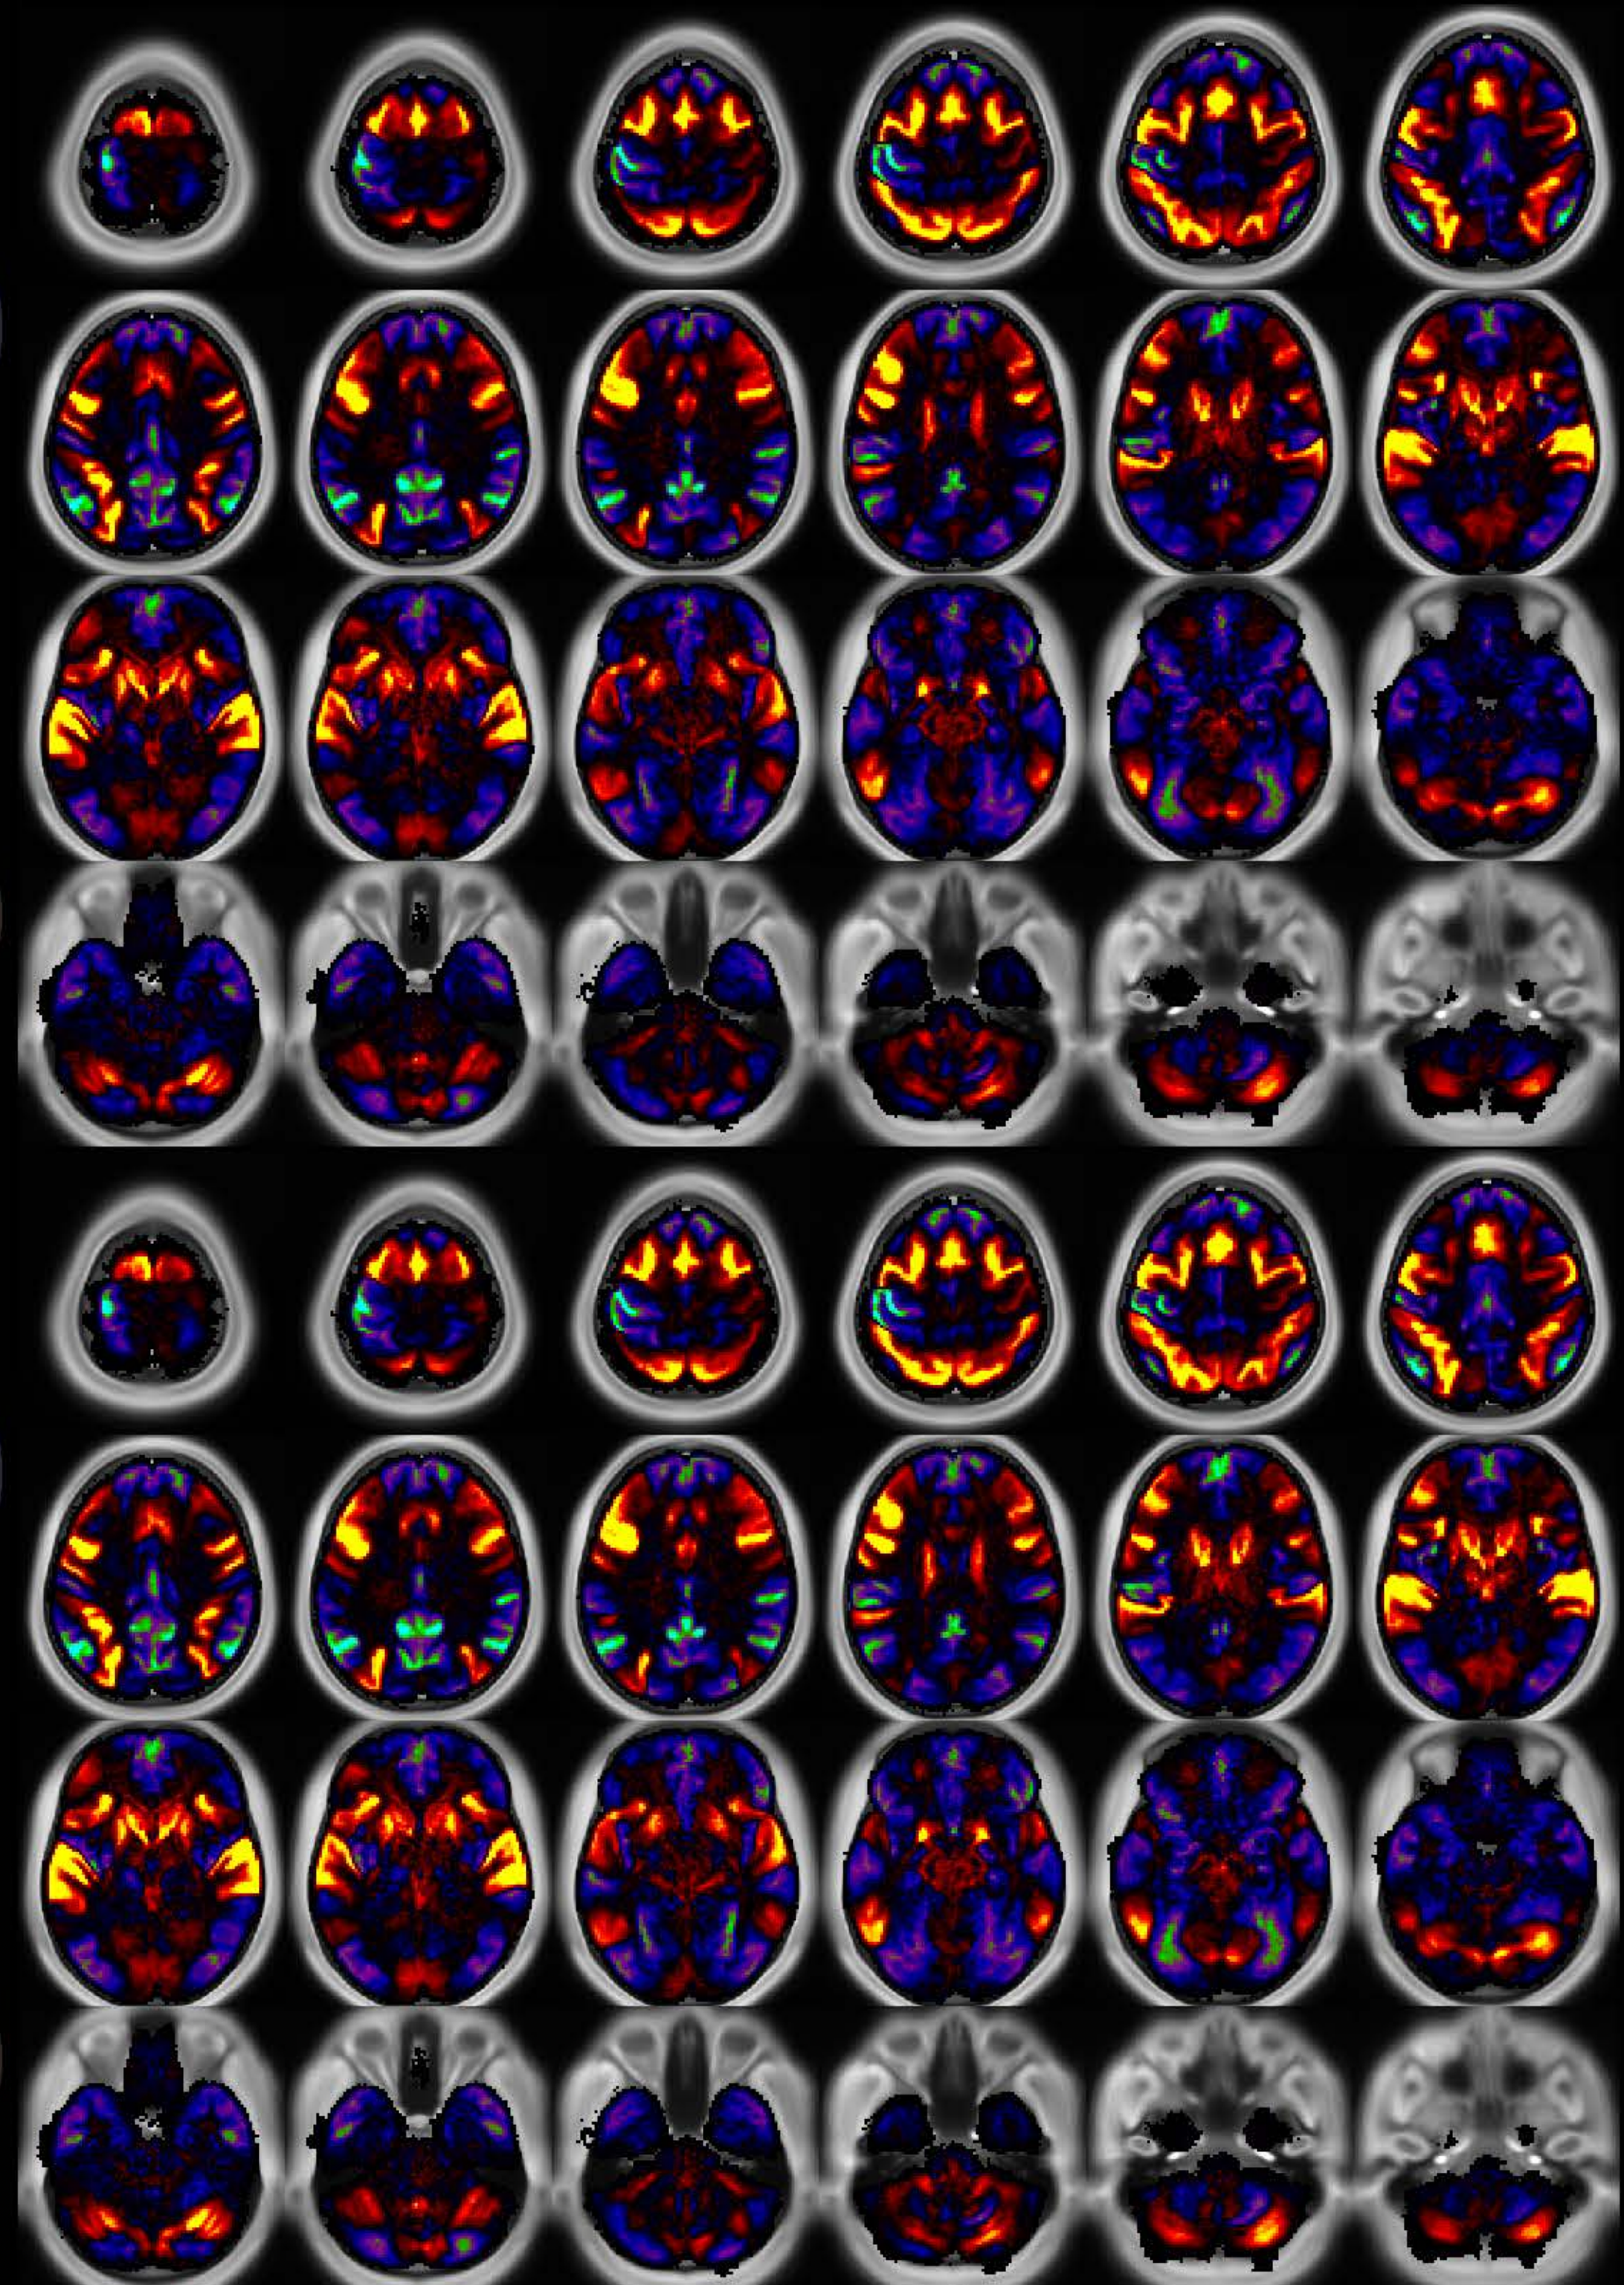

Seconds

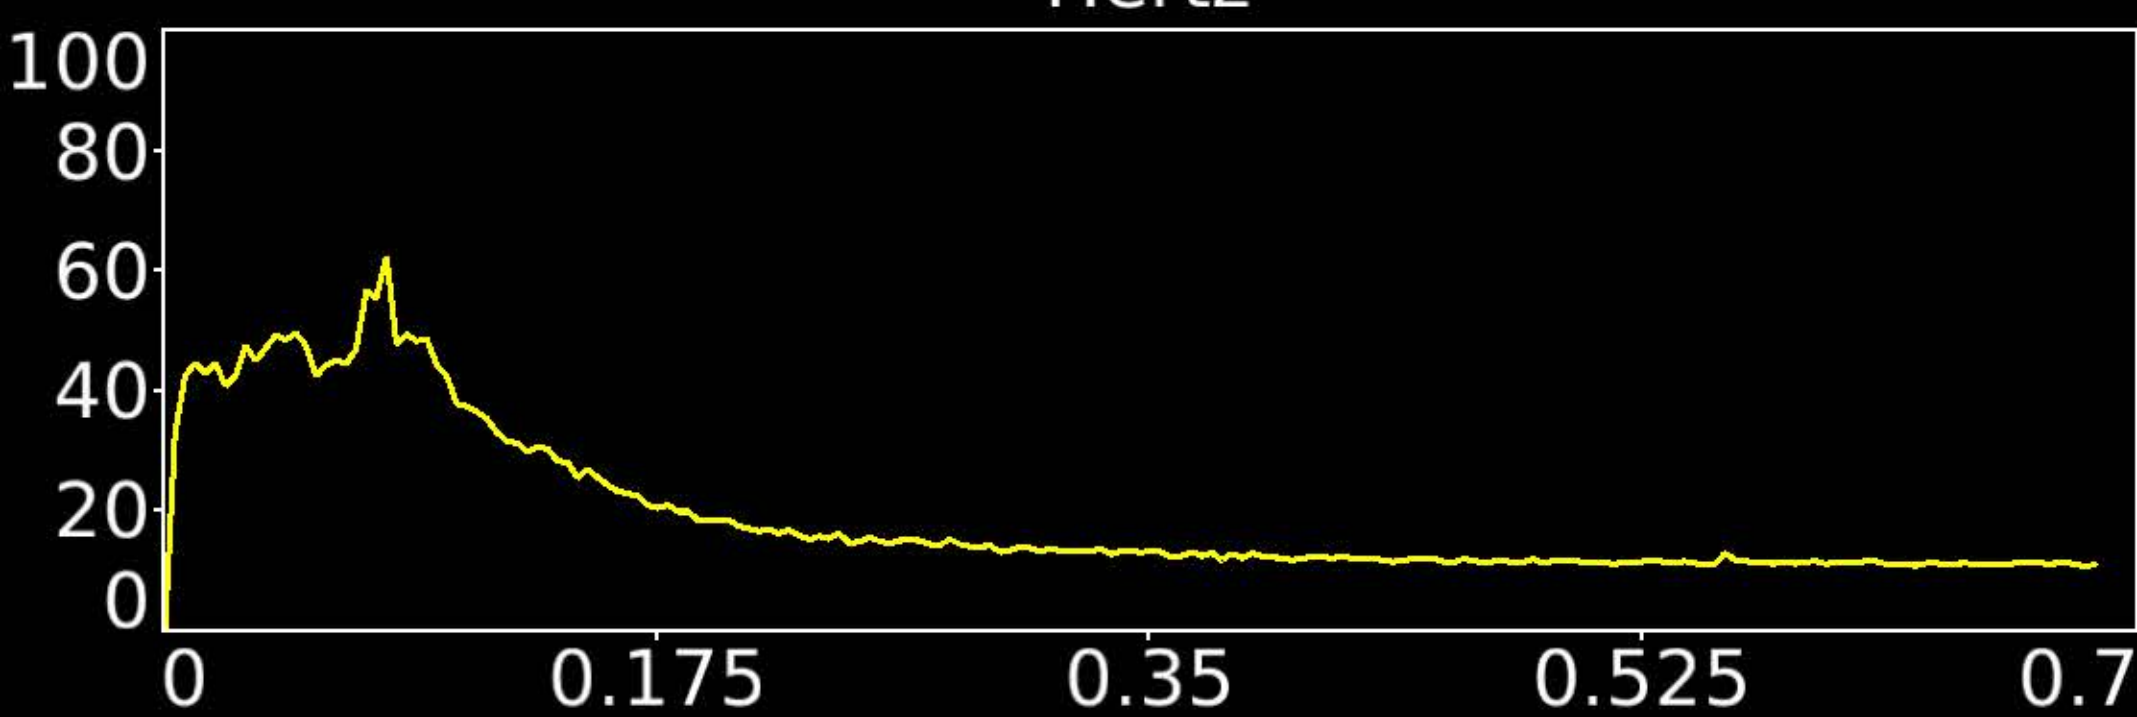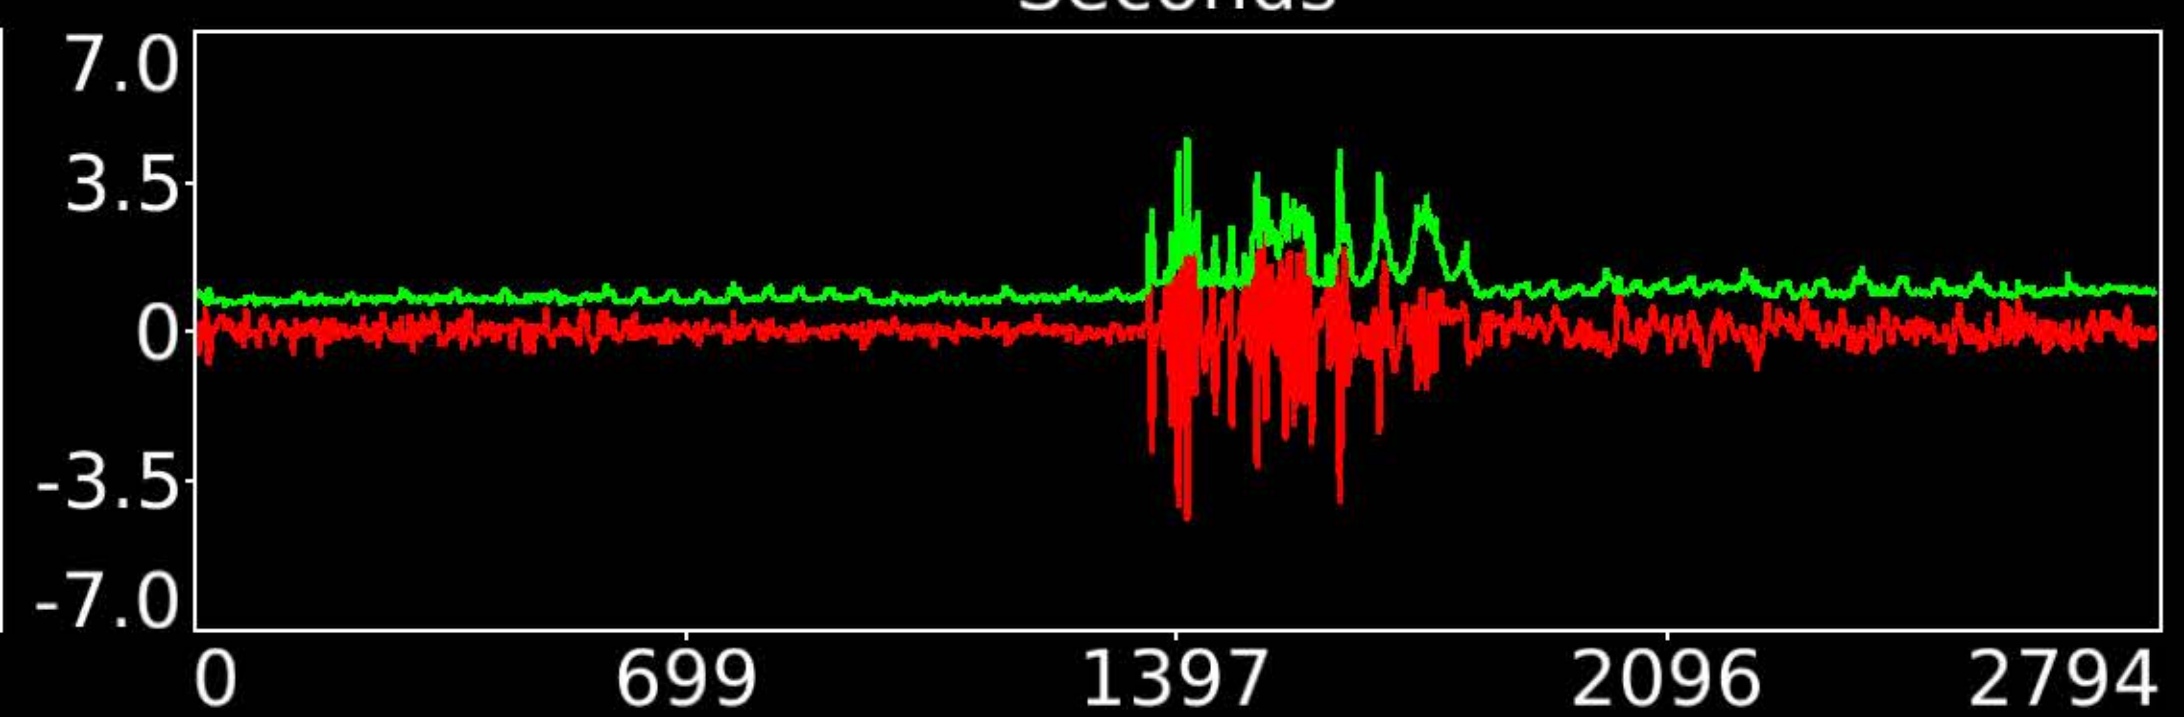

|                           |                            |                                     |  |
|---------------------------|----------------------------|-------------------------------------|--|
| Number & Class: 12 Signal |                            | Name: Residual Task (Language Math) |  |
| RVT Correlated: No        | DVARS Dip Associated: No   | Cross-Subject Variable: No          |  |
| Single Subject: No        | % Variance Explained: 2.34 | Globality Index: 0.03               |  |
| Task Component: No        | Rest Component: 12         | Task Modulated: Language            |  |

Rationale: Spatial map includes positive and negative patches that are correlated with a specific task design



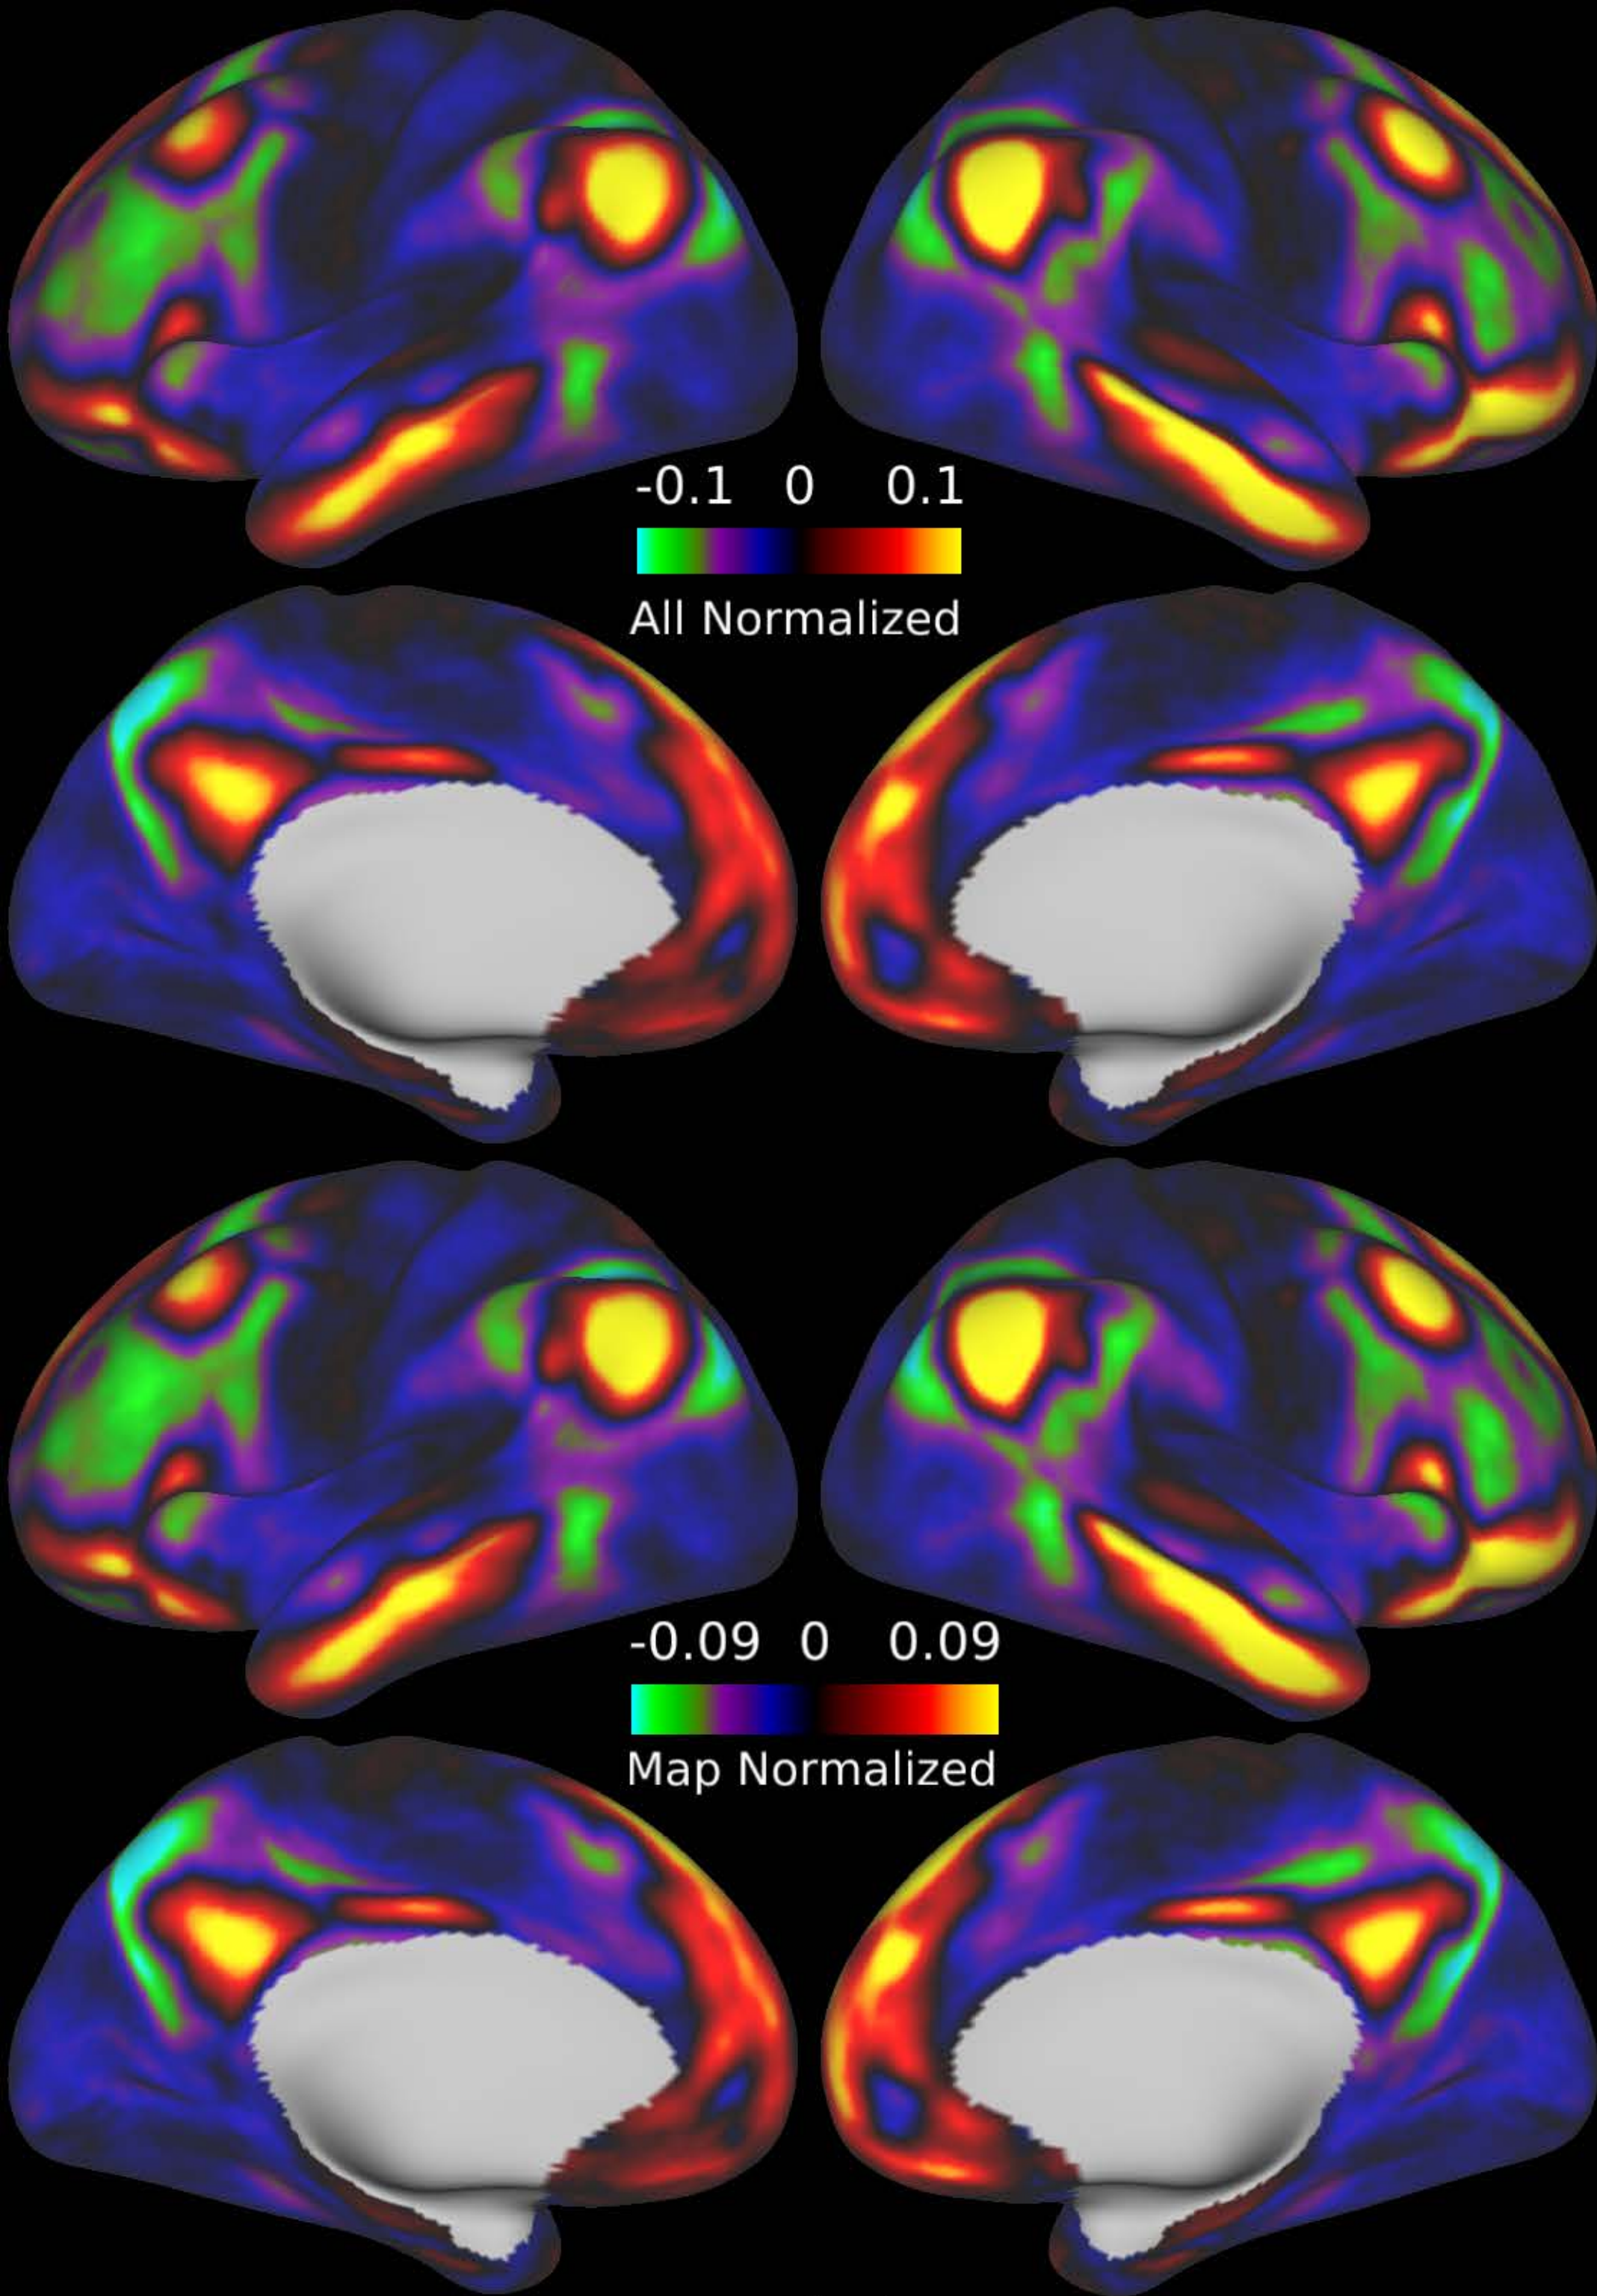

Hertz

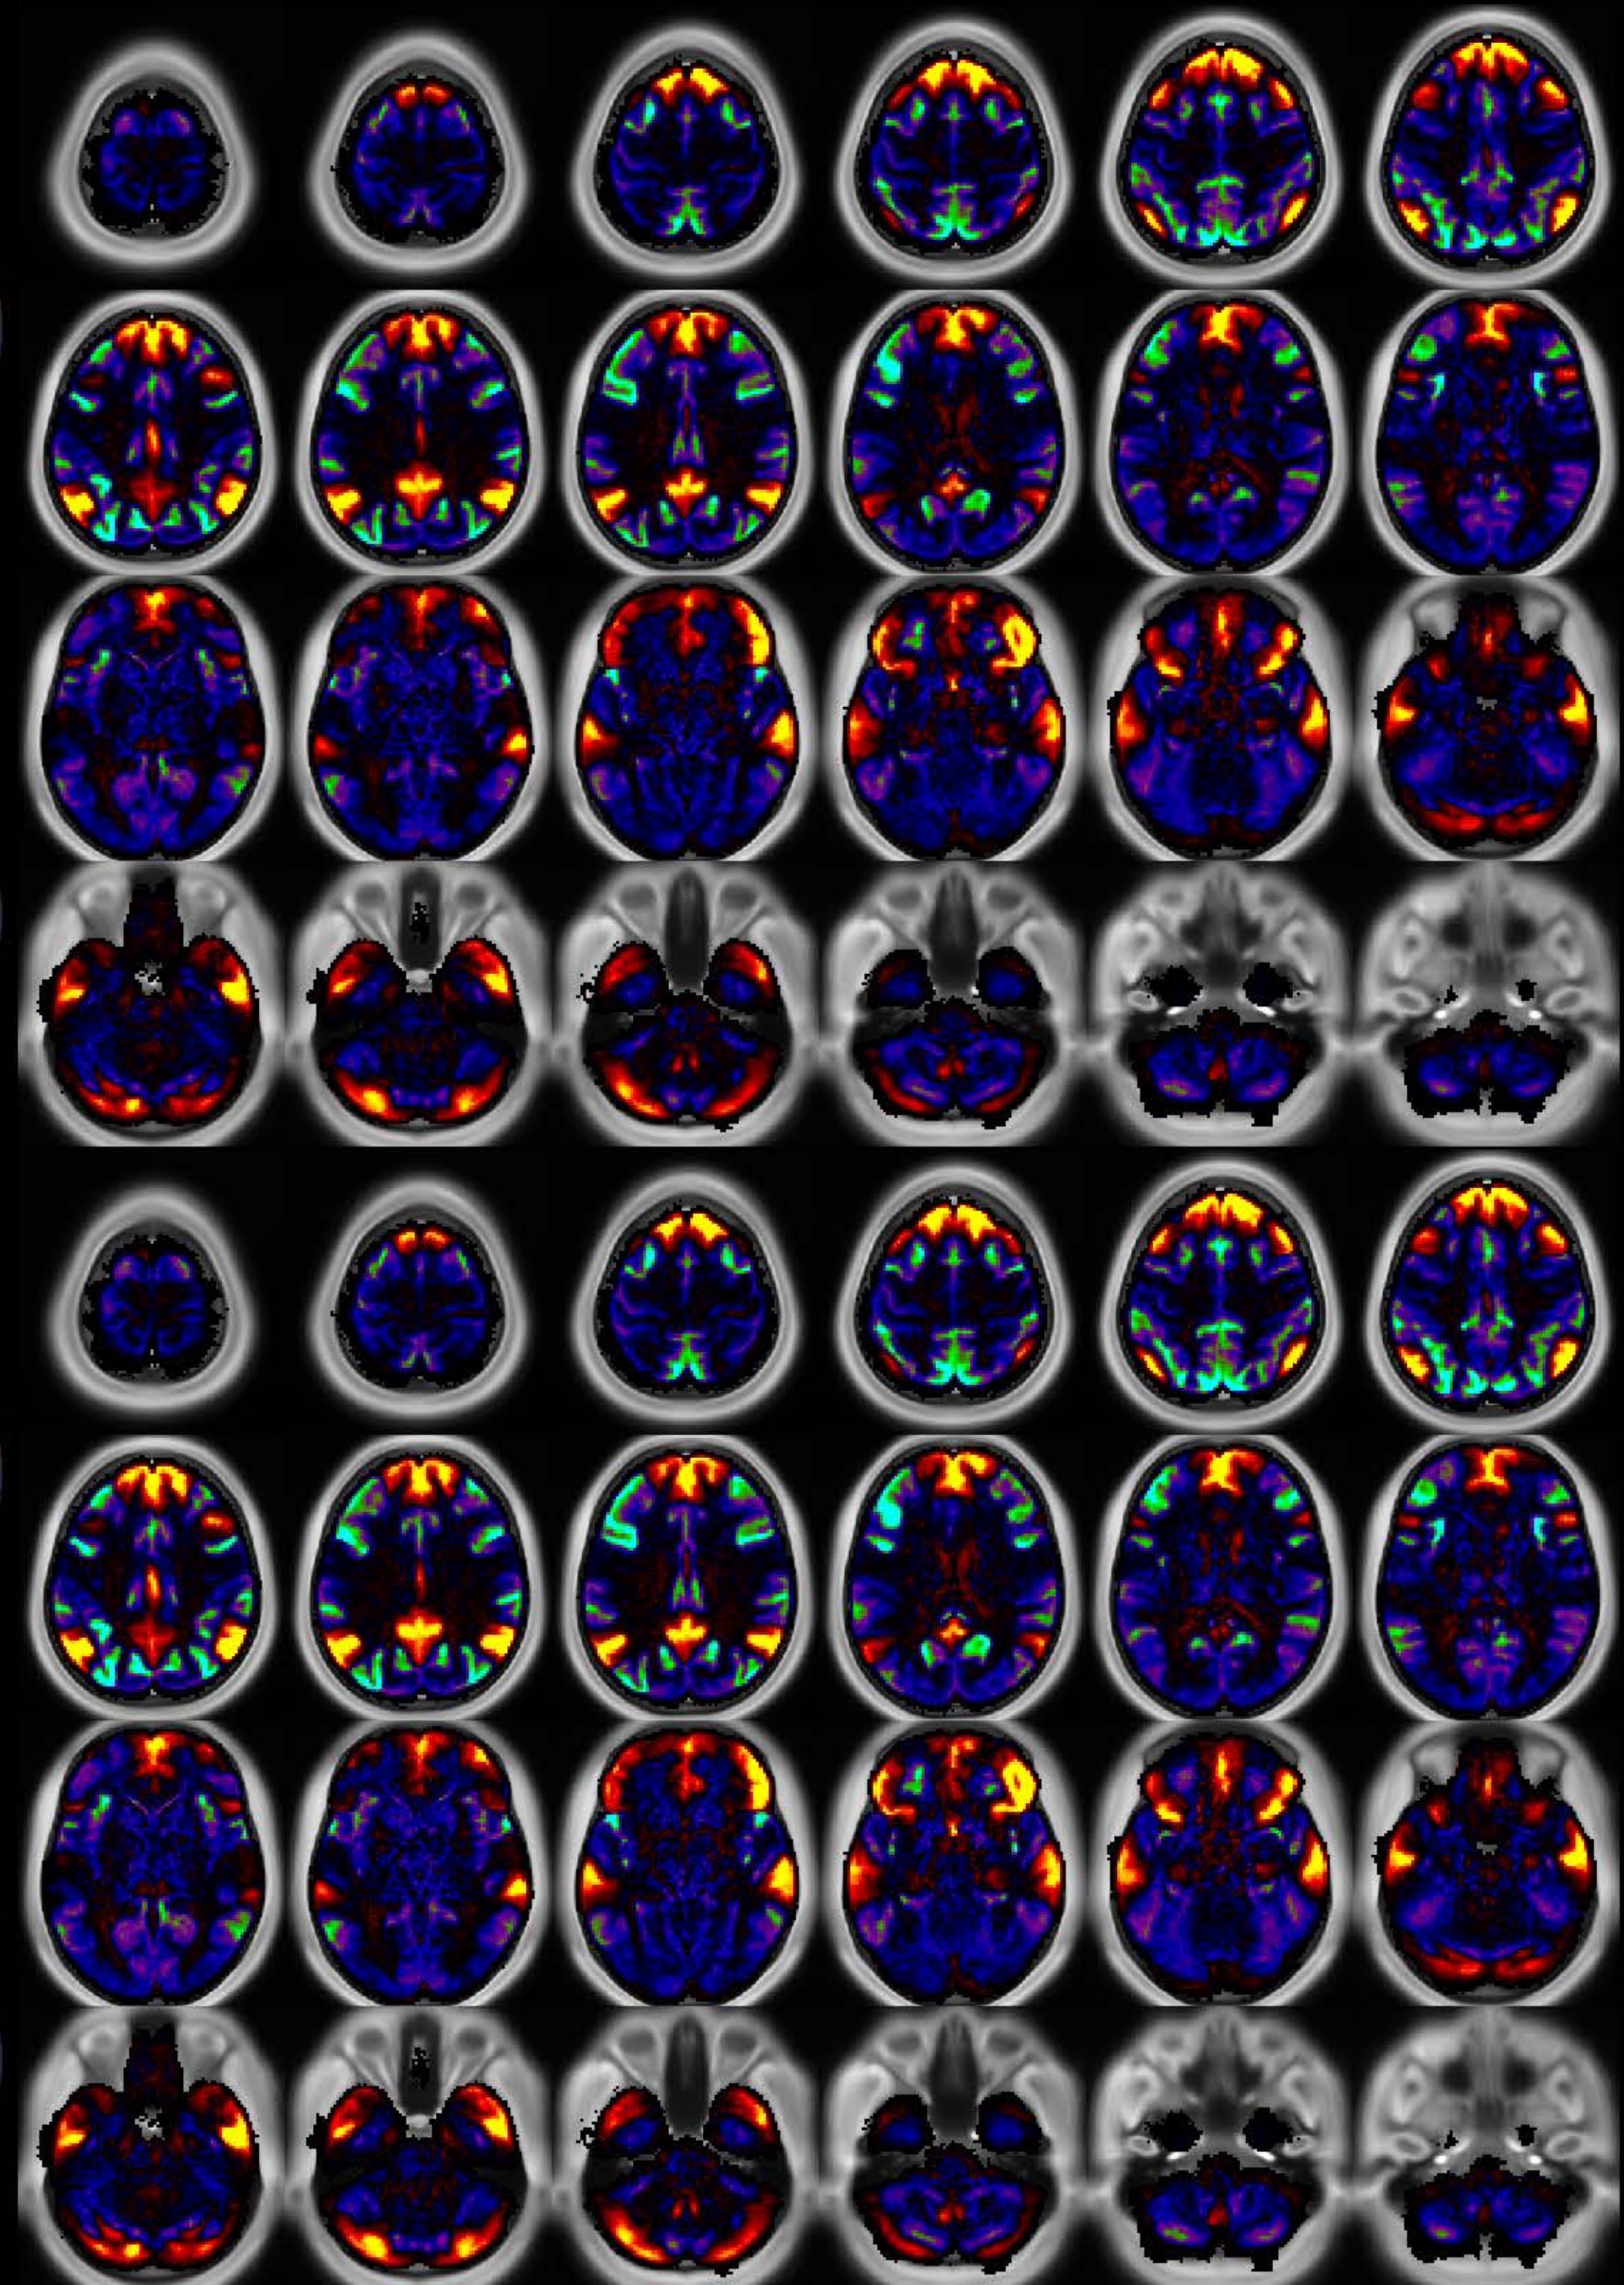

Seconds

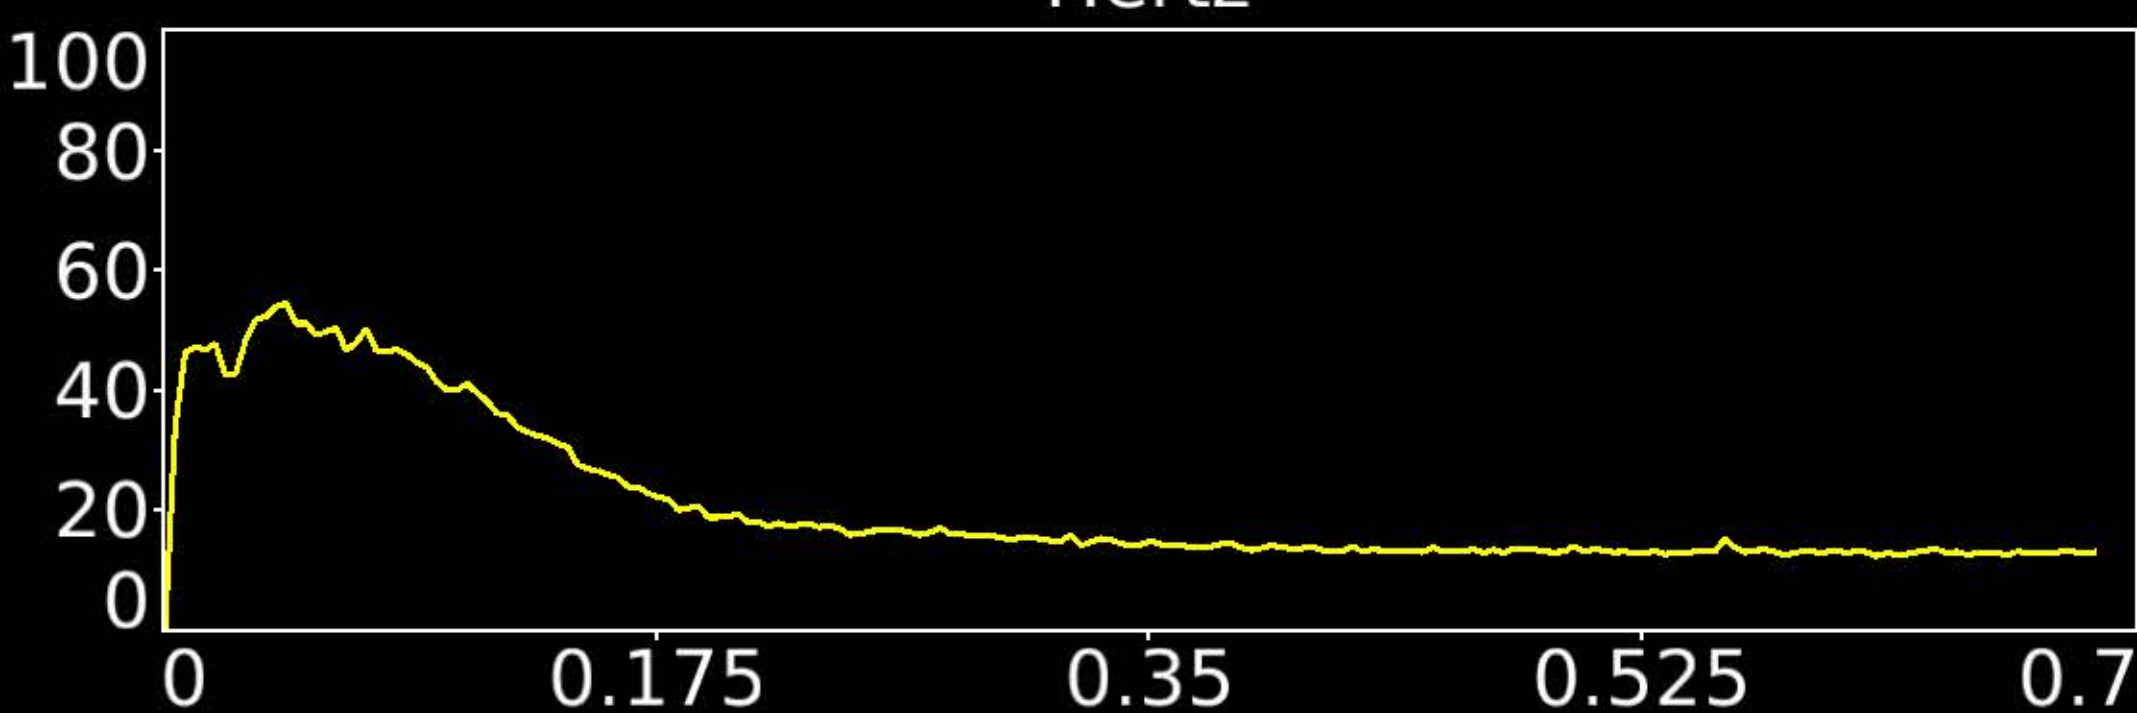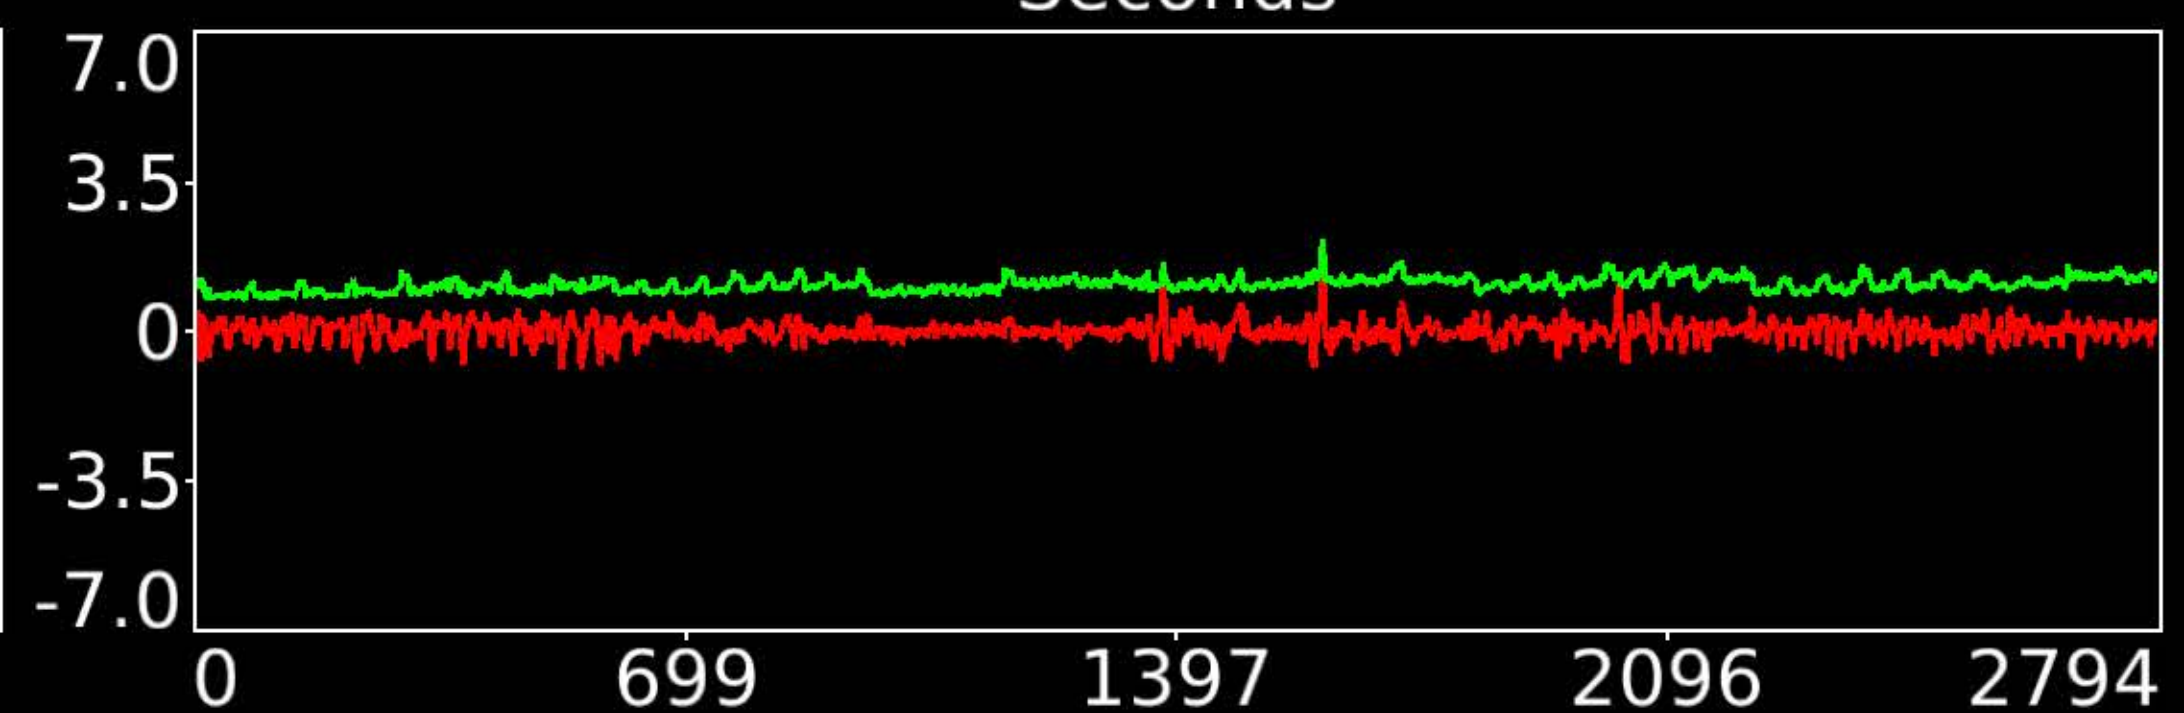

|                           |                            |                               |  |
|---------------------------|----------------------------|-------------------------------|--|
| Number & Class: 13 Signal |                            | Name: Subsidiary Default Mode |  |
| RVT Correlated: No        | DVARS Dip Associated: No   | Cross-Subject Variable: No    |  |
| Single Subject: No        | % Variance Explained: 2.34 | Globality Index: 1.52         |  |
| Task Component: No        | Rest Component: -21        | Task Modulated: No            |  |

Rationale: Spatial map includes positive and negative patches that respect known RSNs (e.g. Default Mode Network)



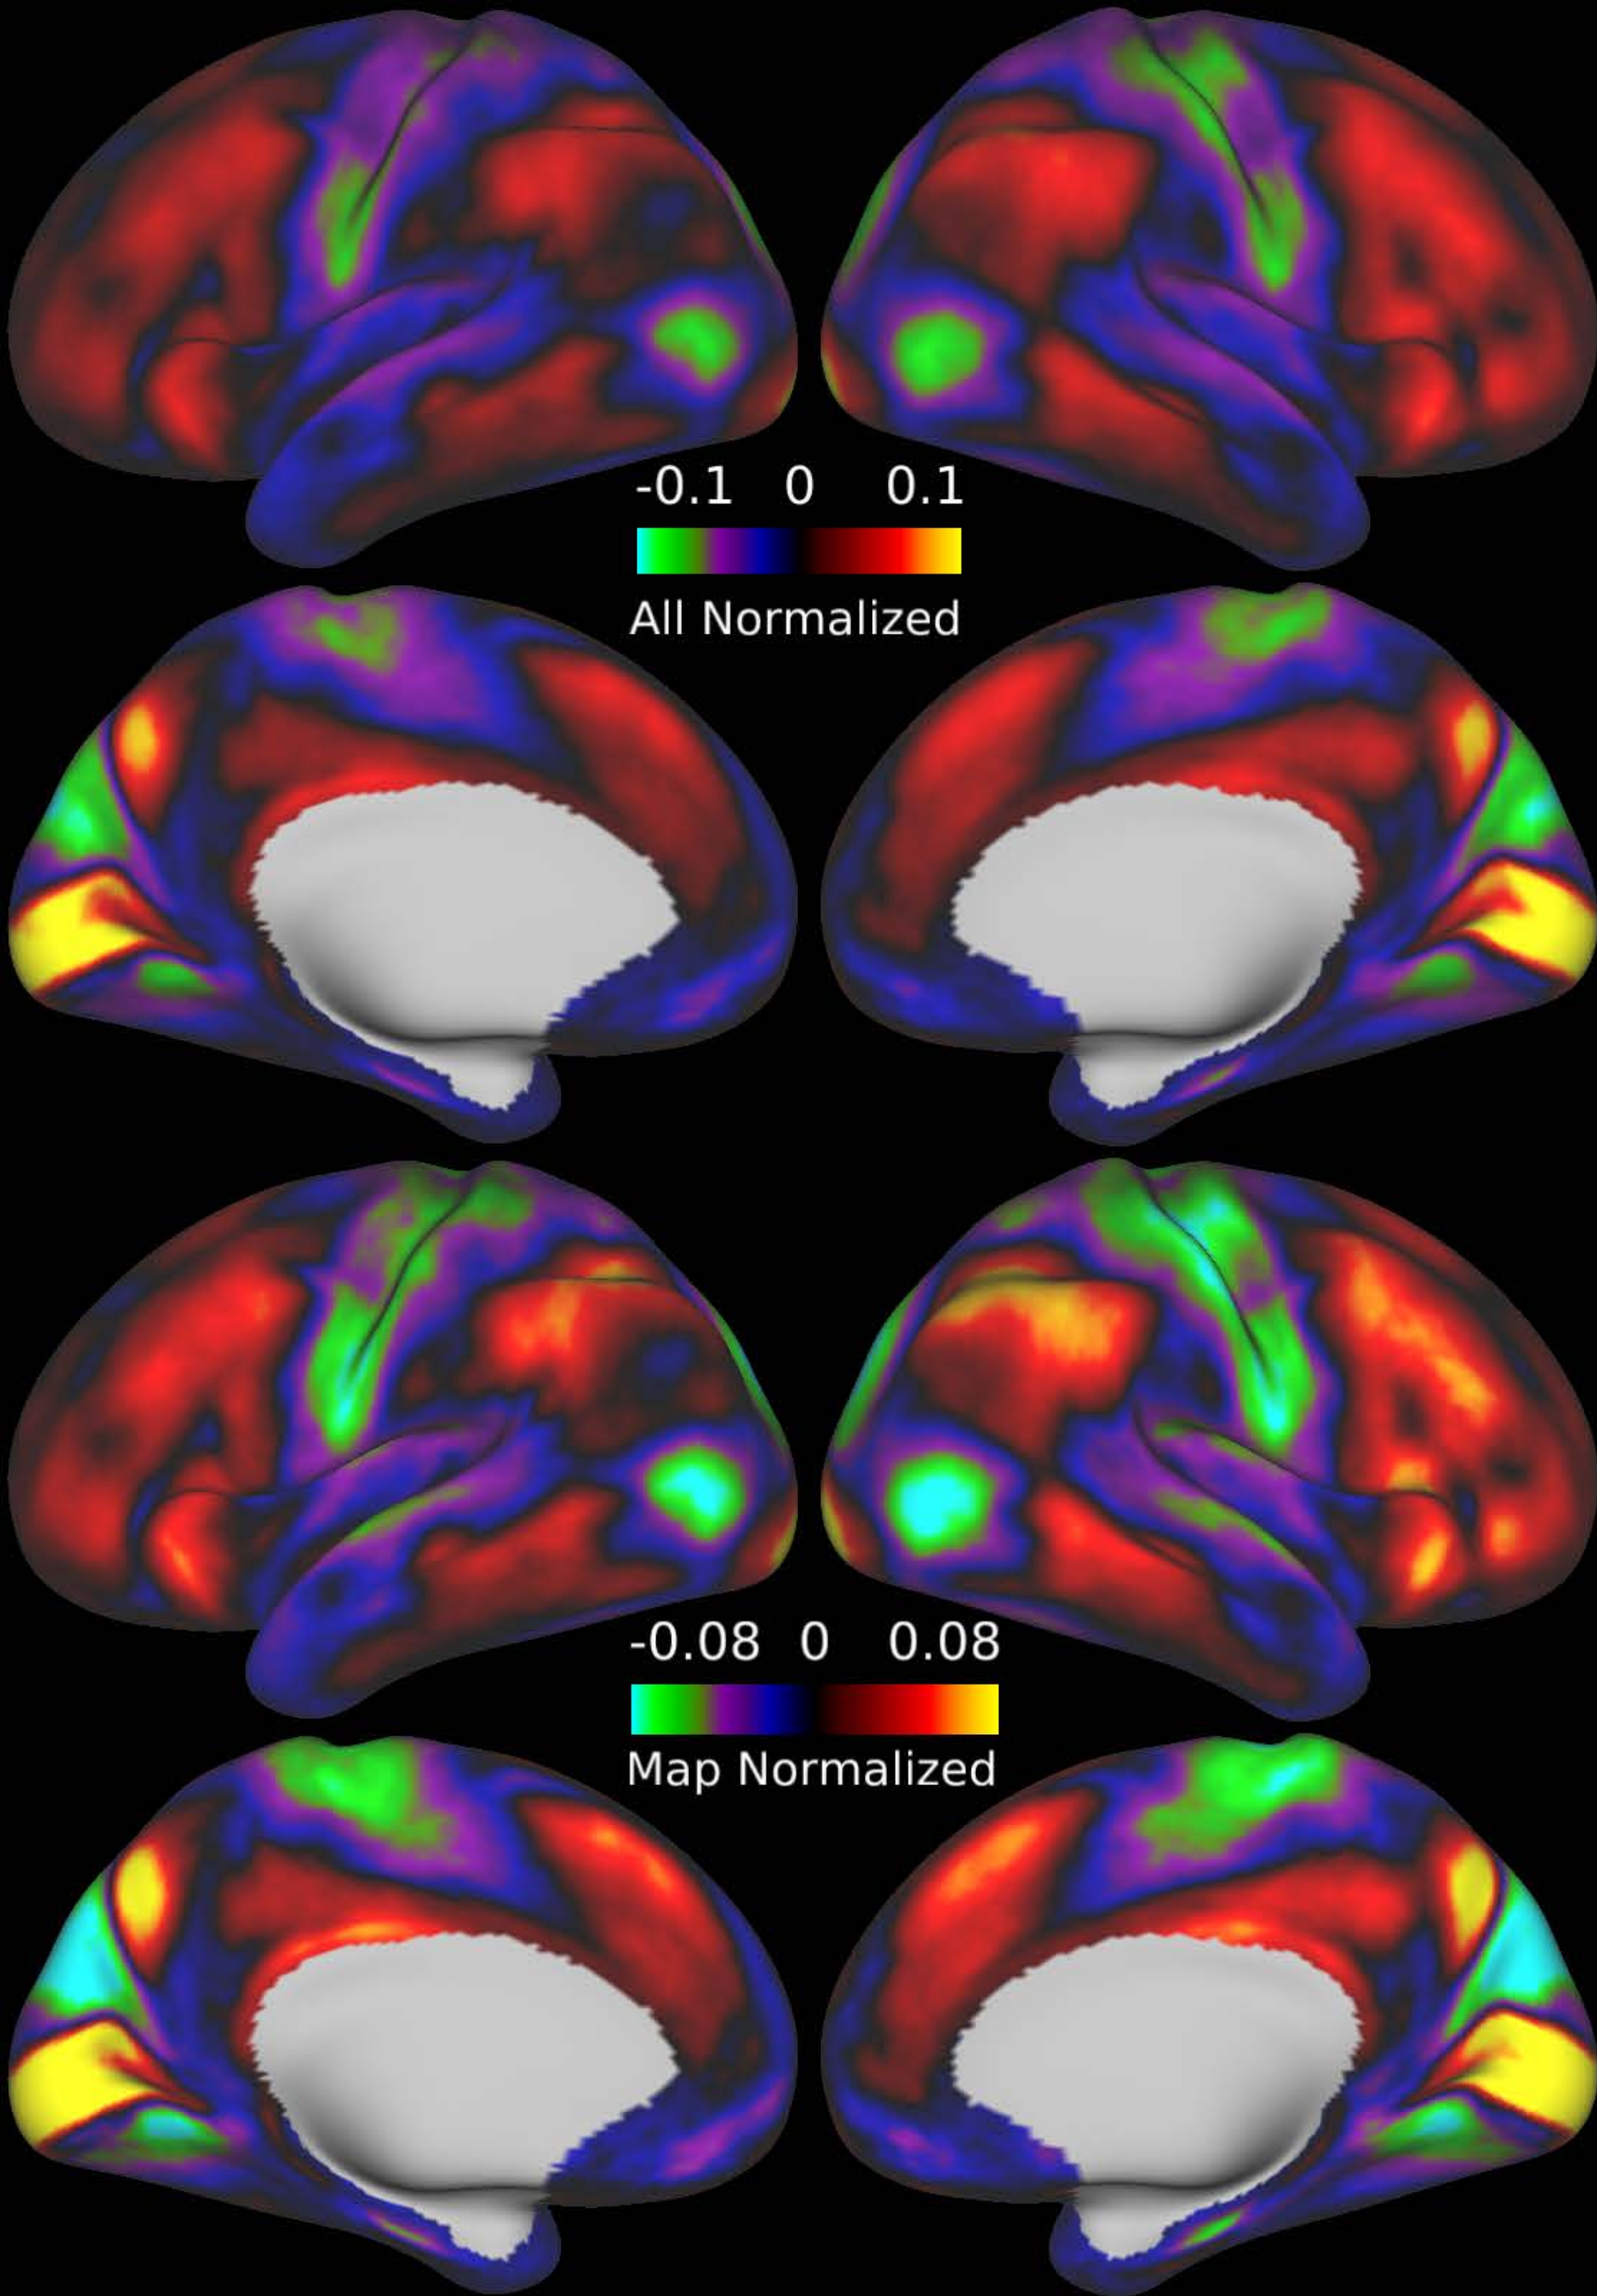

Hertz

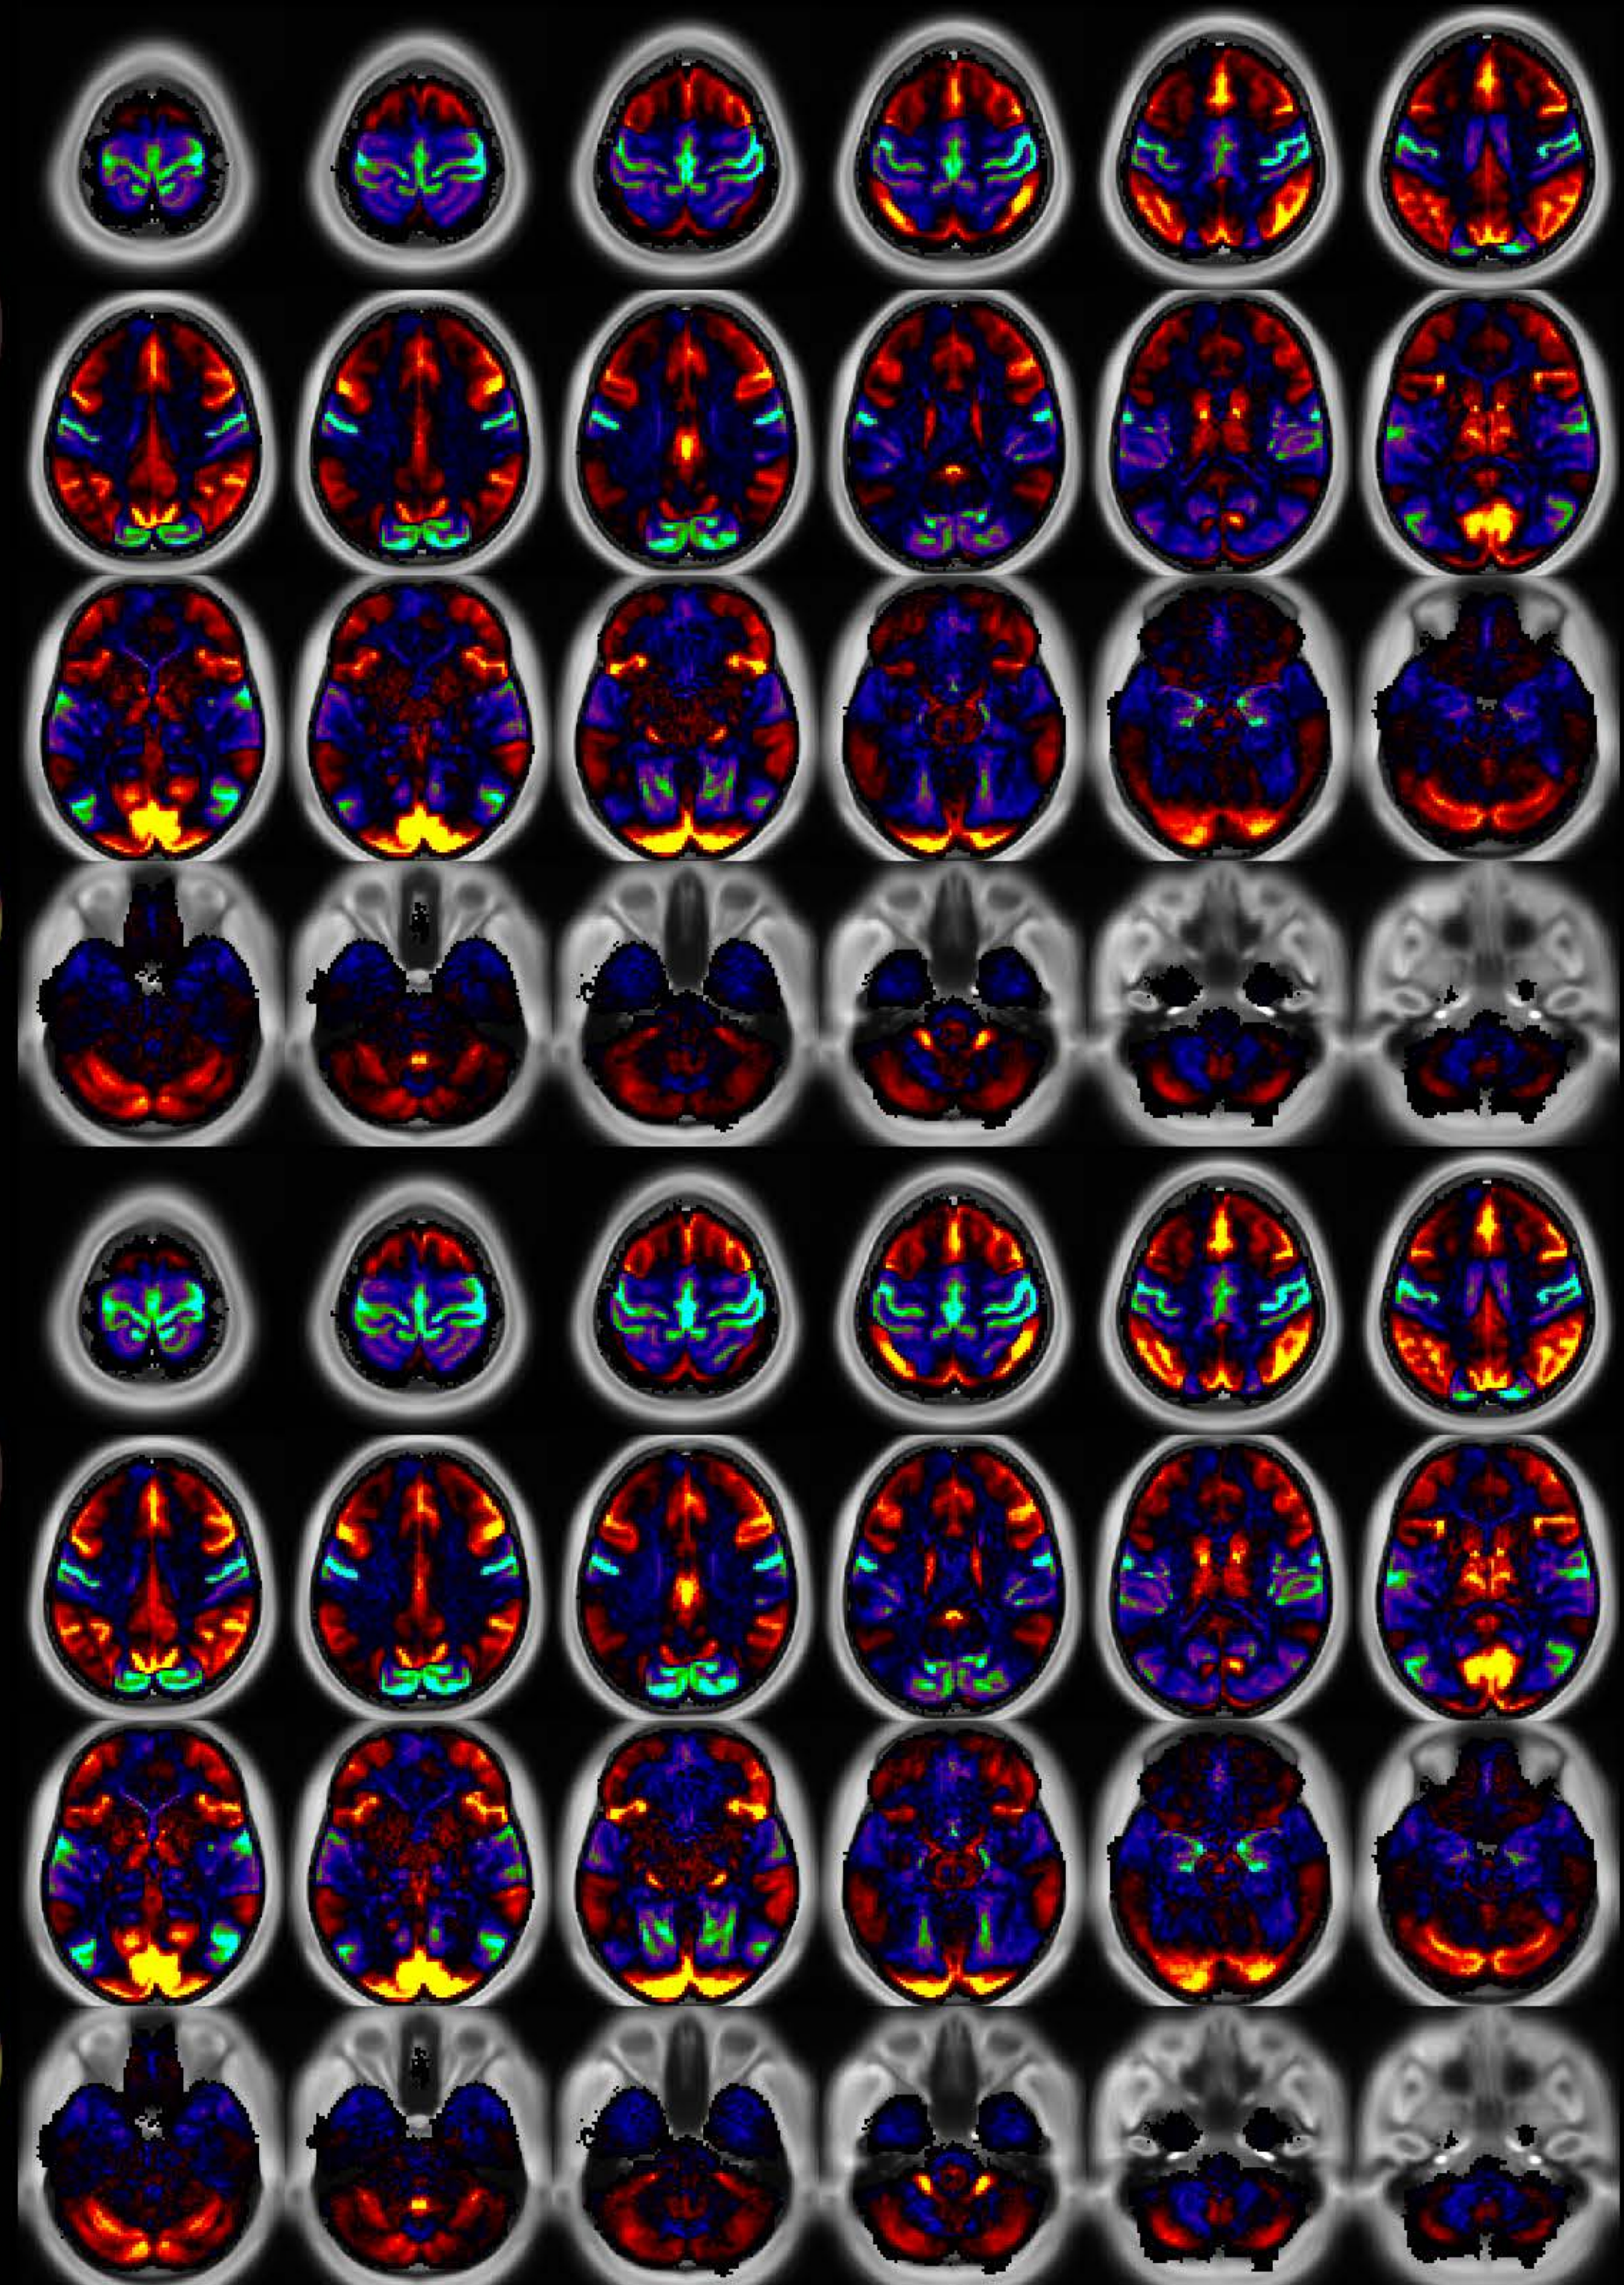

Seconds

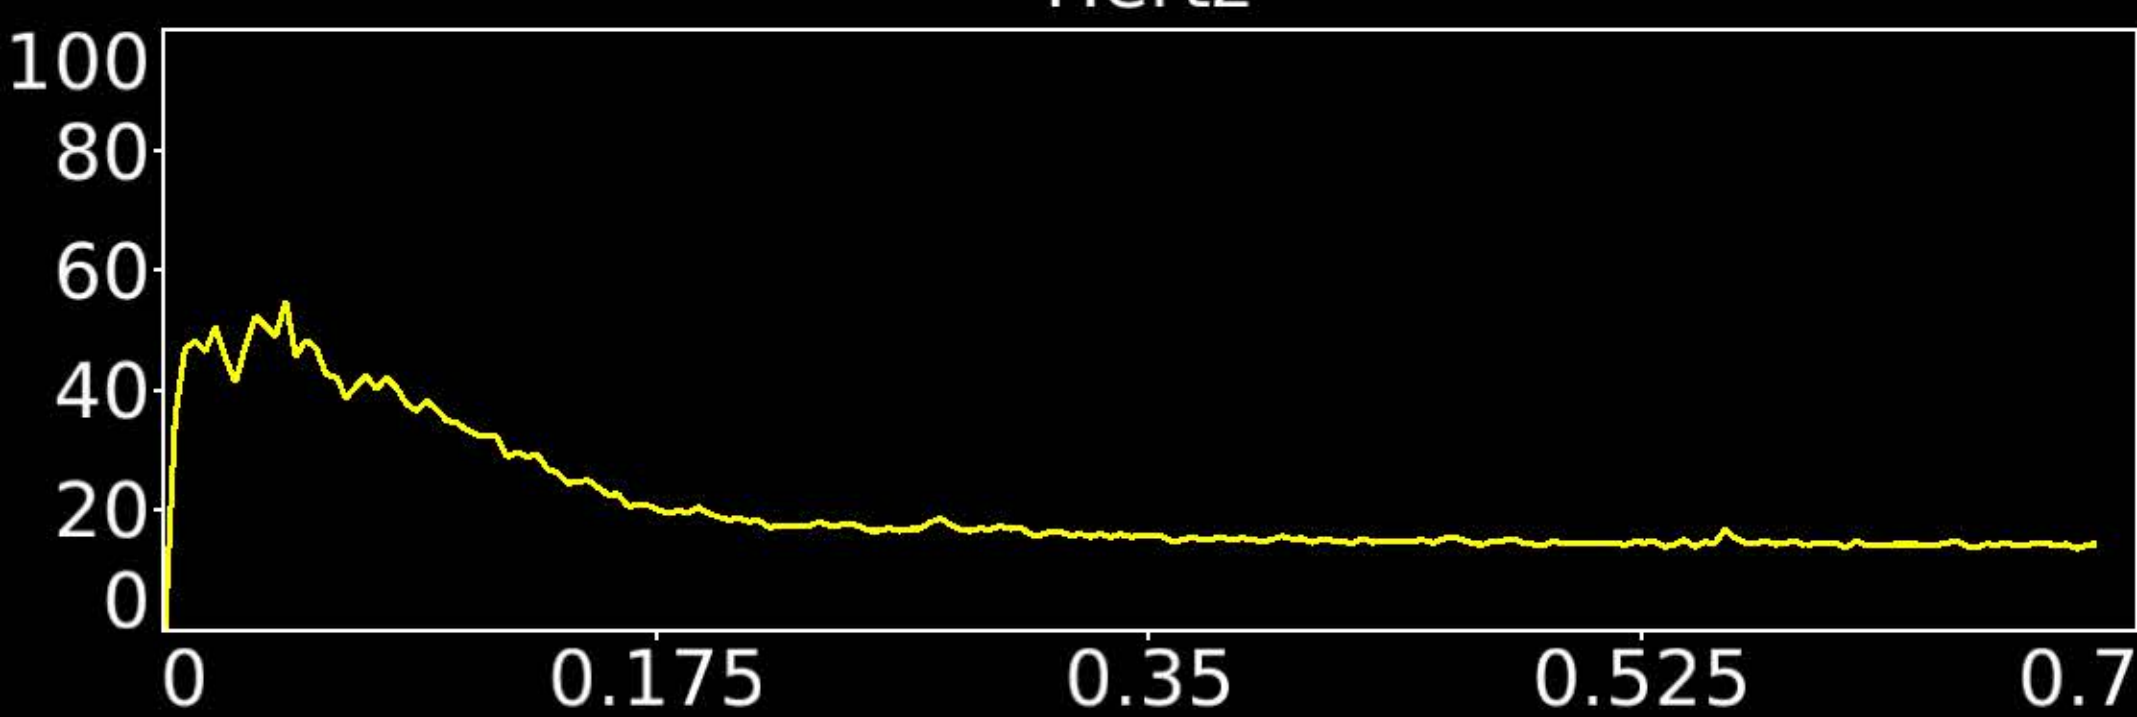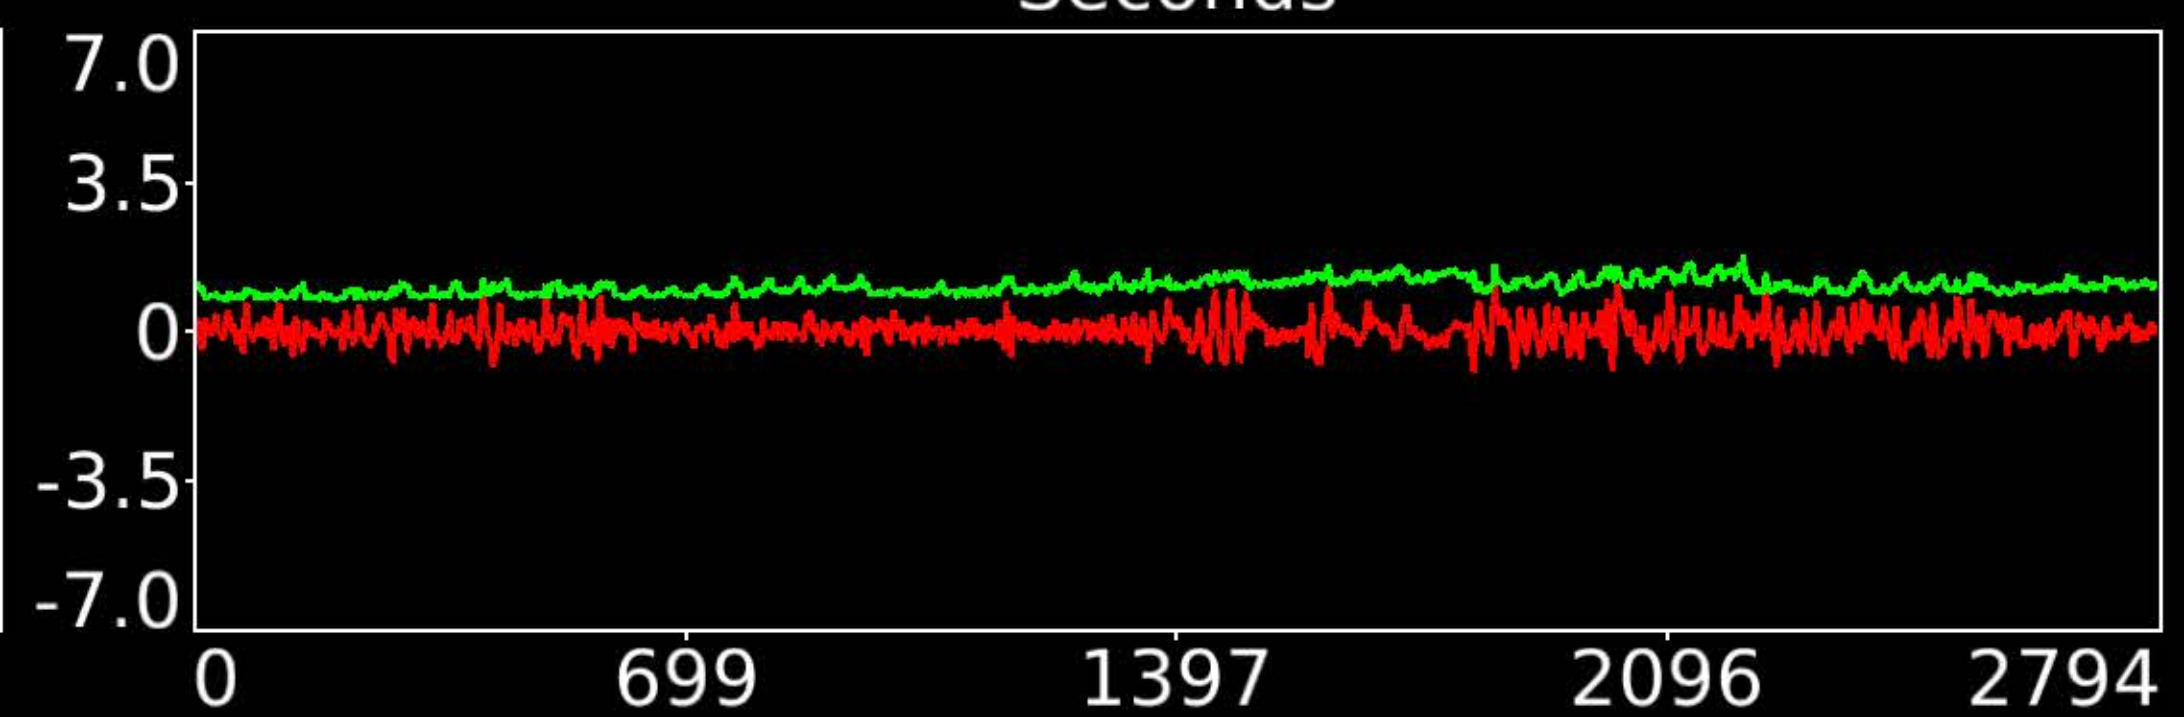

|                           |                            |                                    |  |
|---------------------------|----------------------------|------------------------------------|--|
| Number & Class: 14 Signal |                            | Name: LGN to V1 Variable Component |  |
| RVT Correlated: No        | DVARS Dip Associated: No   | Cross-Subject Variable: Yes        |  |
| Single Subject: No        | % Variance Explained: 2.27 | Globality Index: 0.02              |  |
| Task Component: 14        | Rest Component: 2          | Task Modulated: No                 |  |

Rationale: Spatial map includes positive and negative patches that respect known areal boundaries (e.g. V1 and V2)



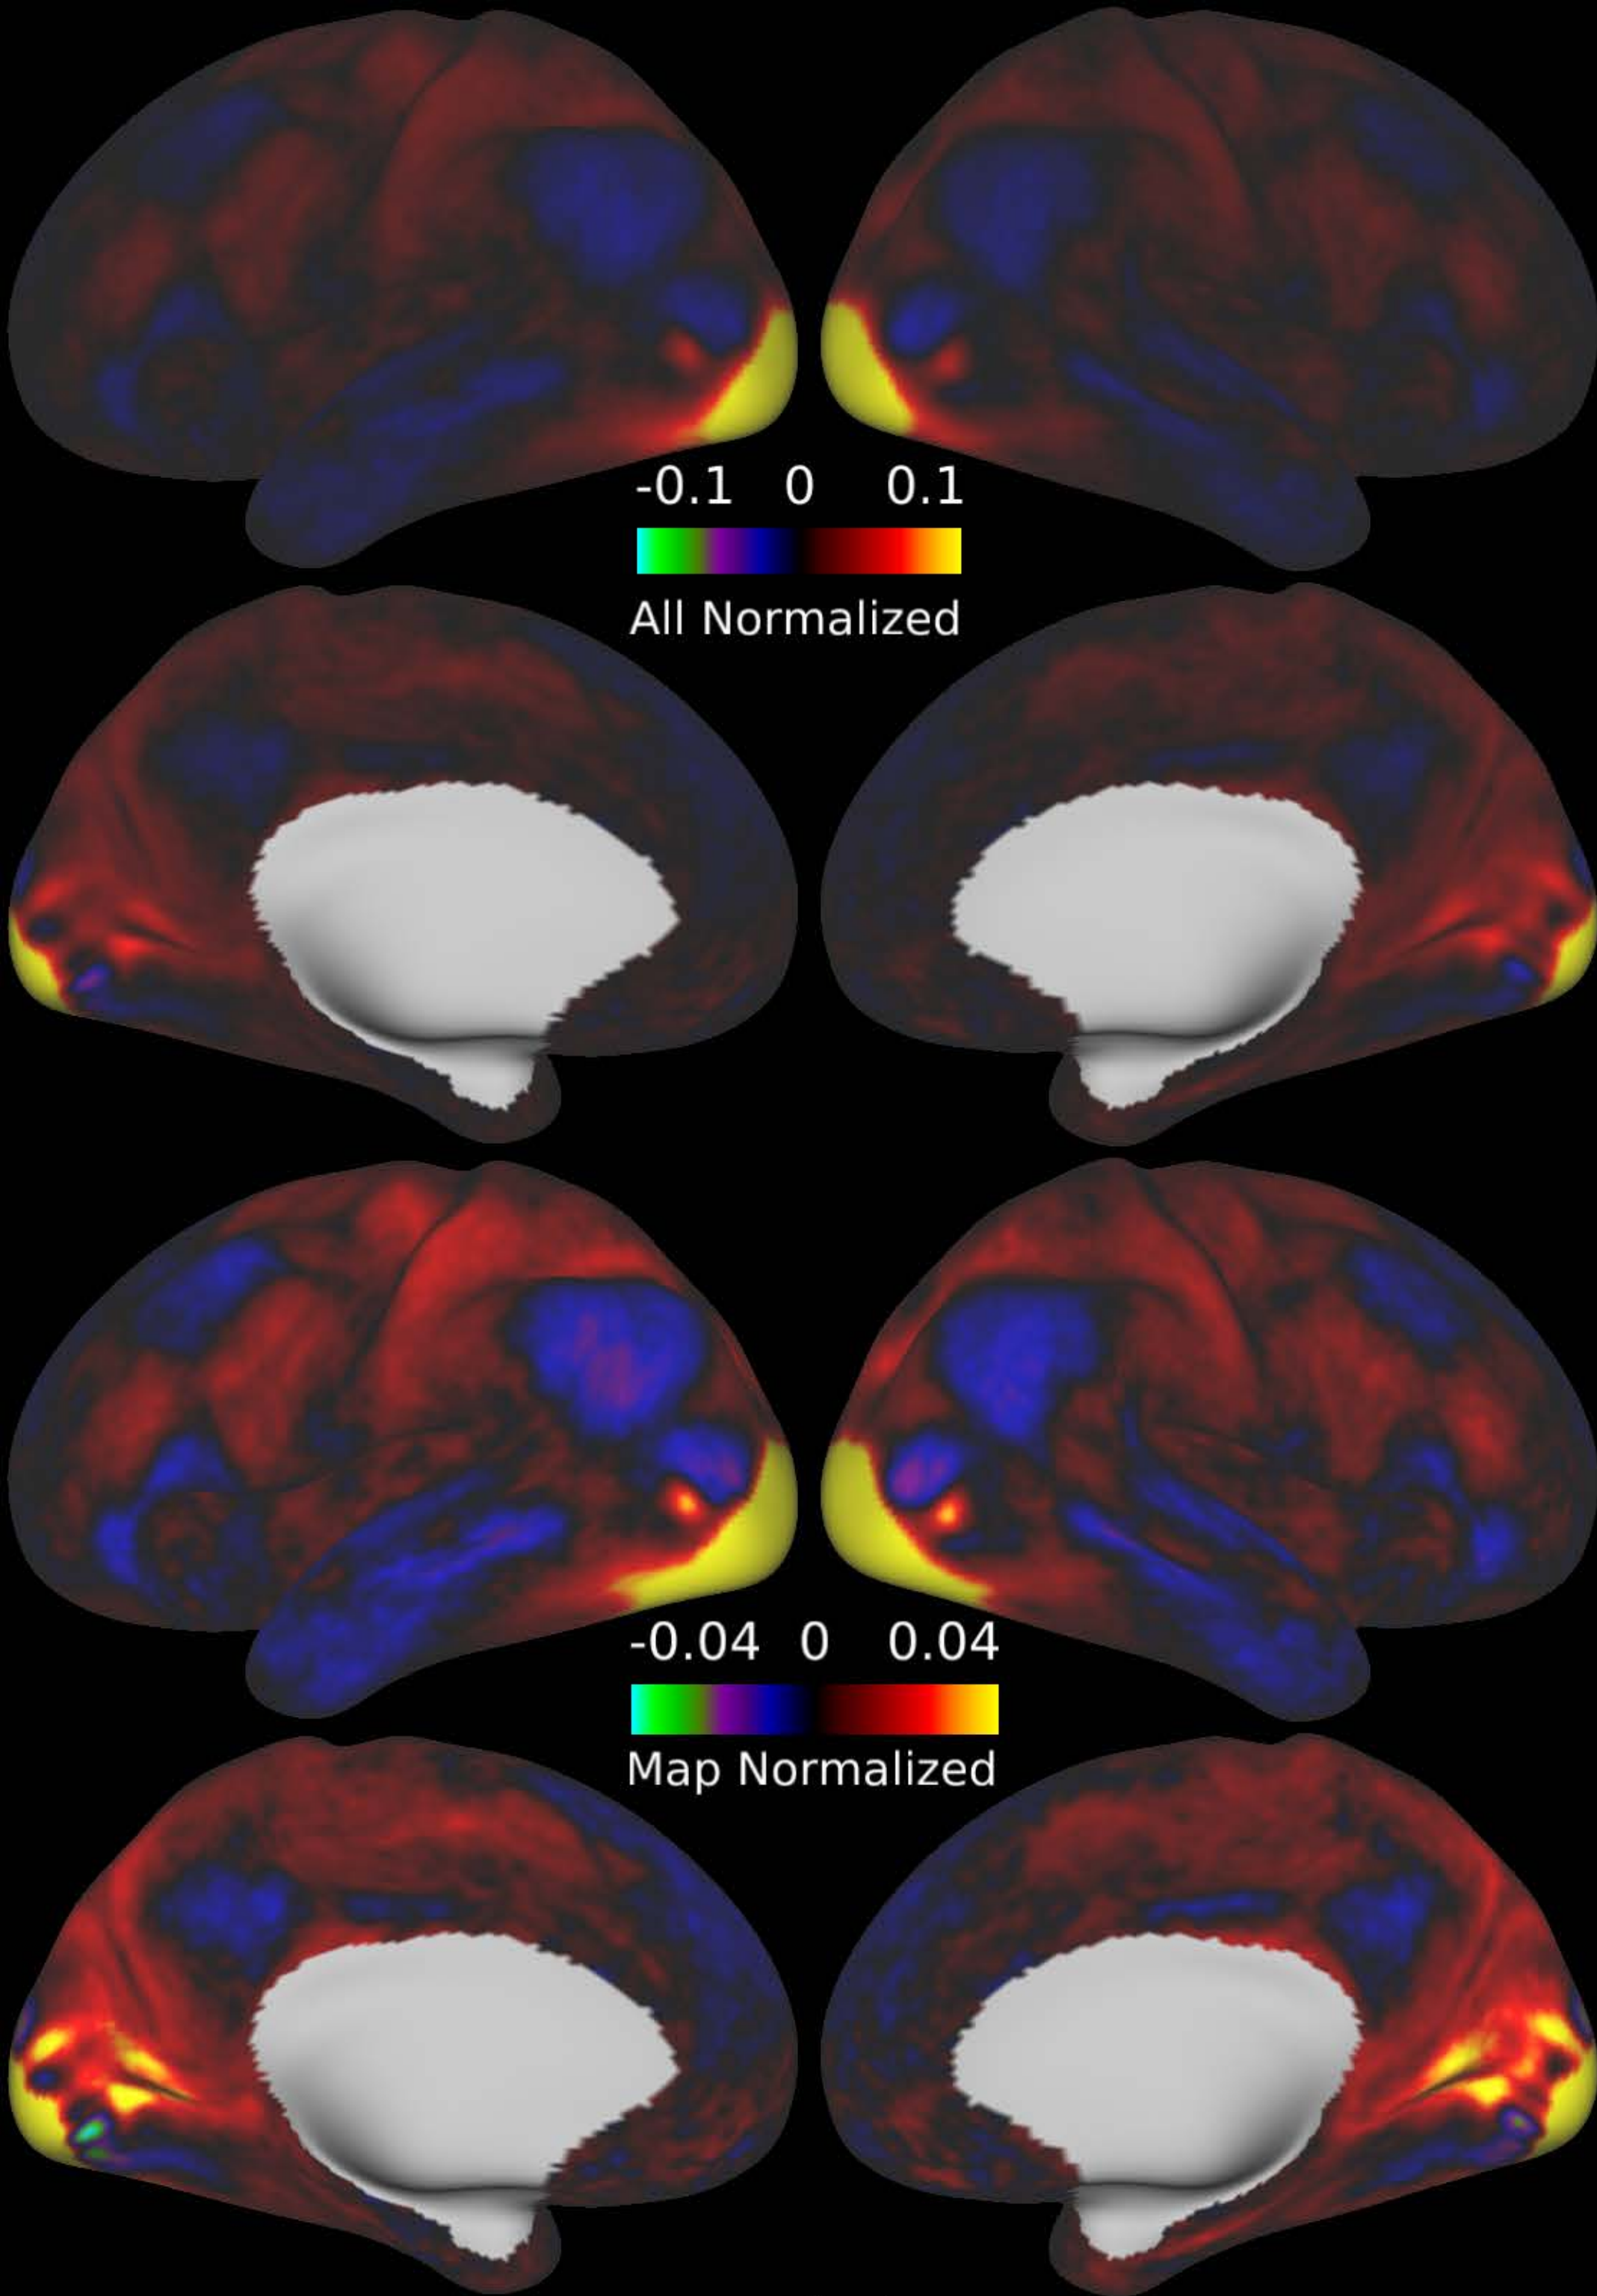

Hertz

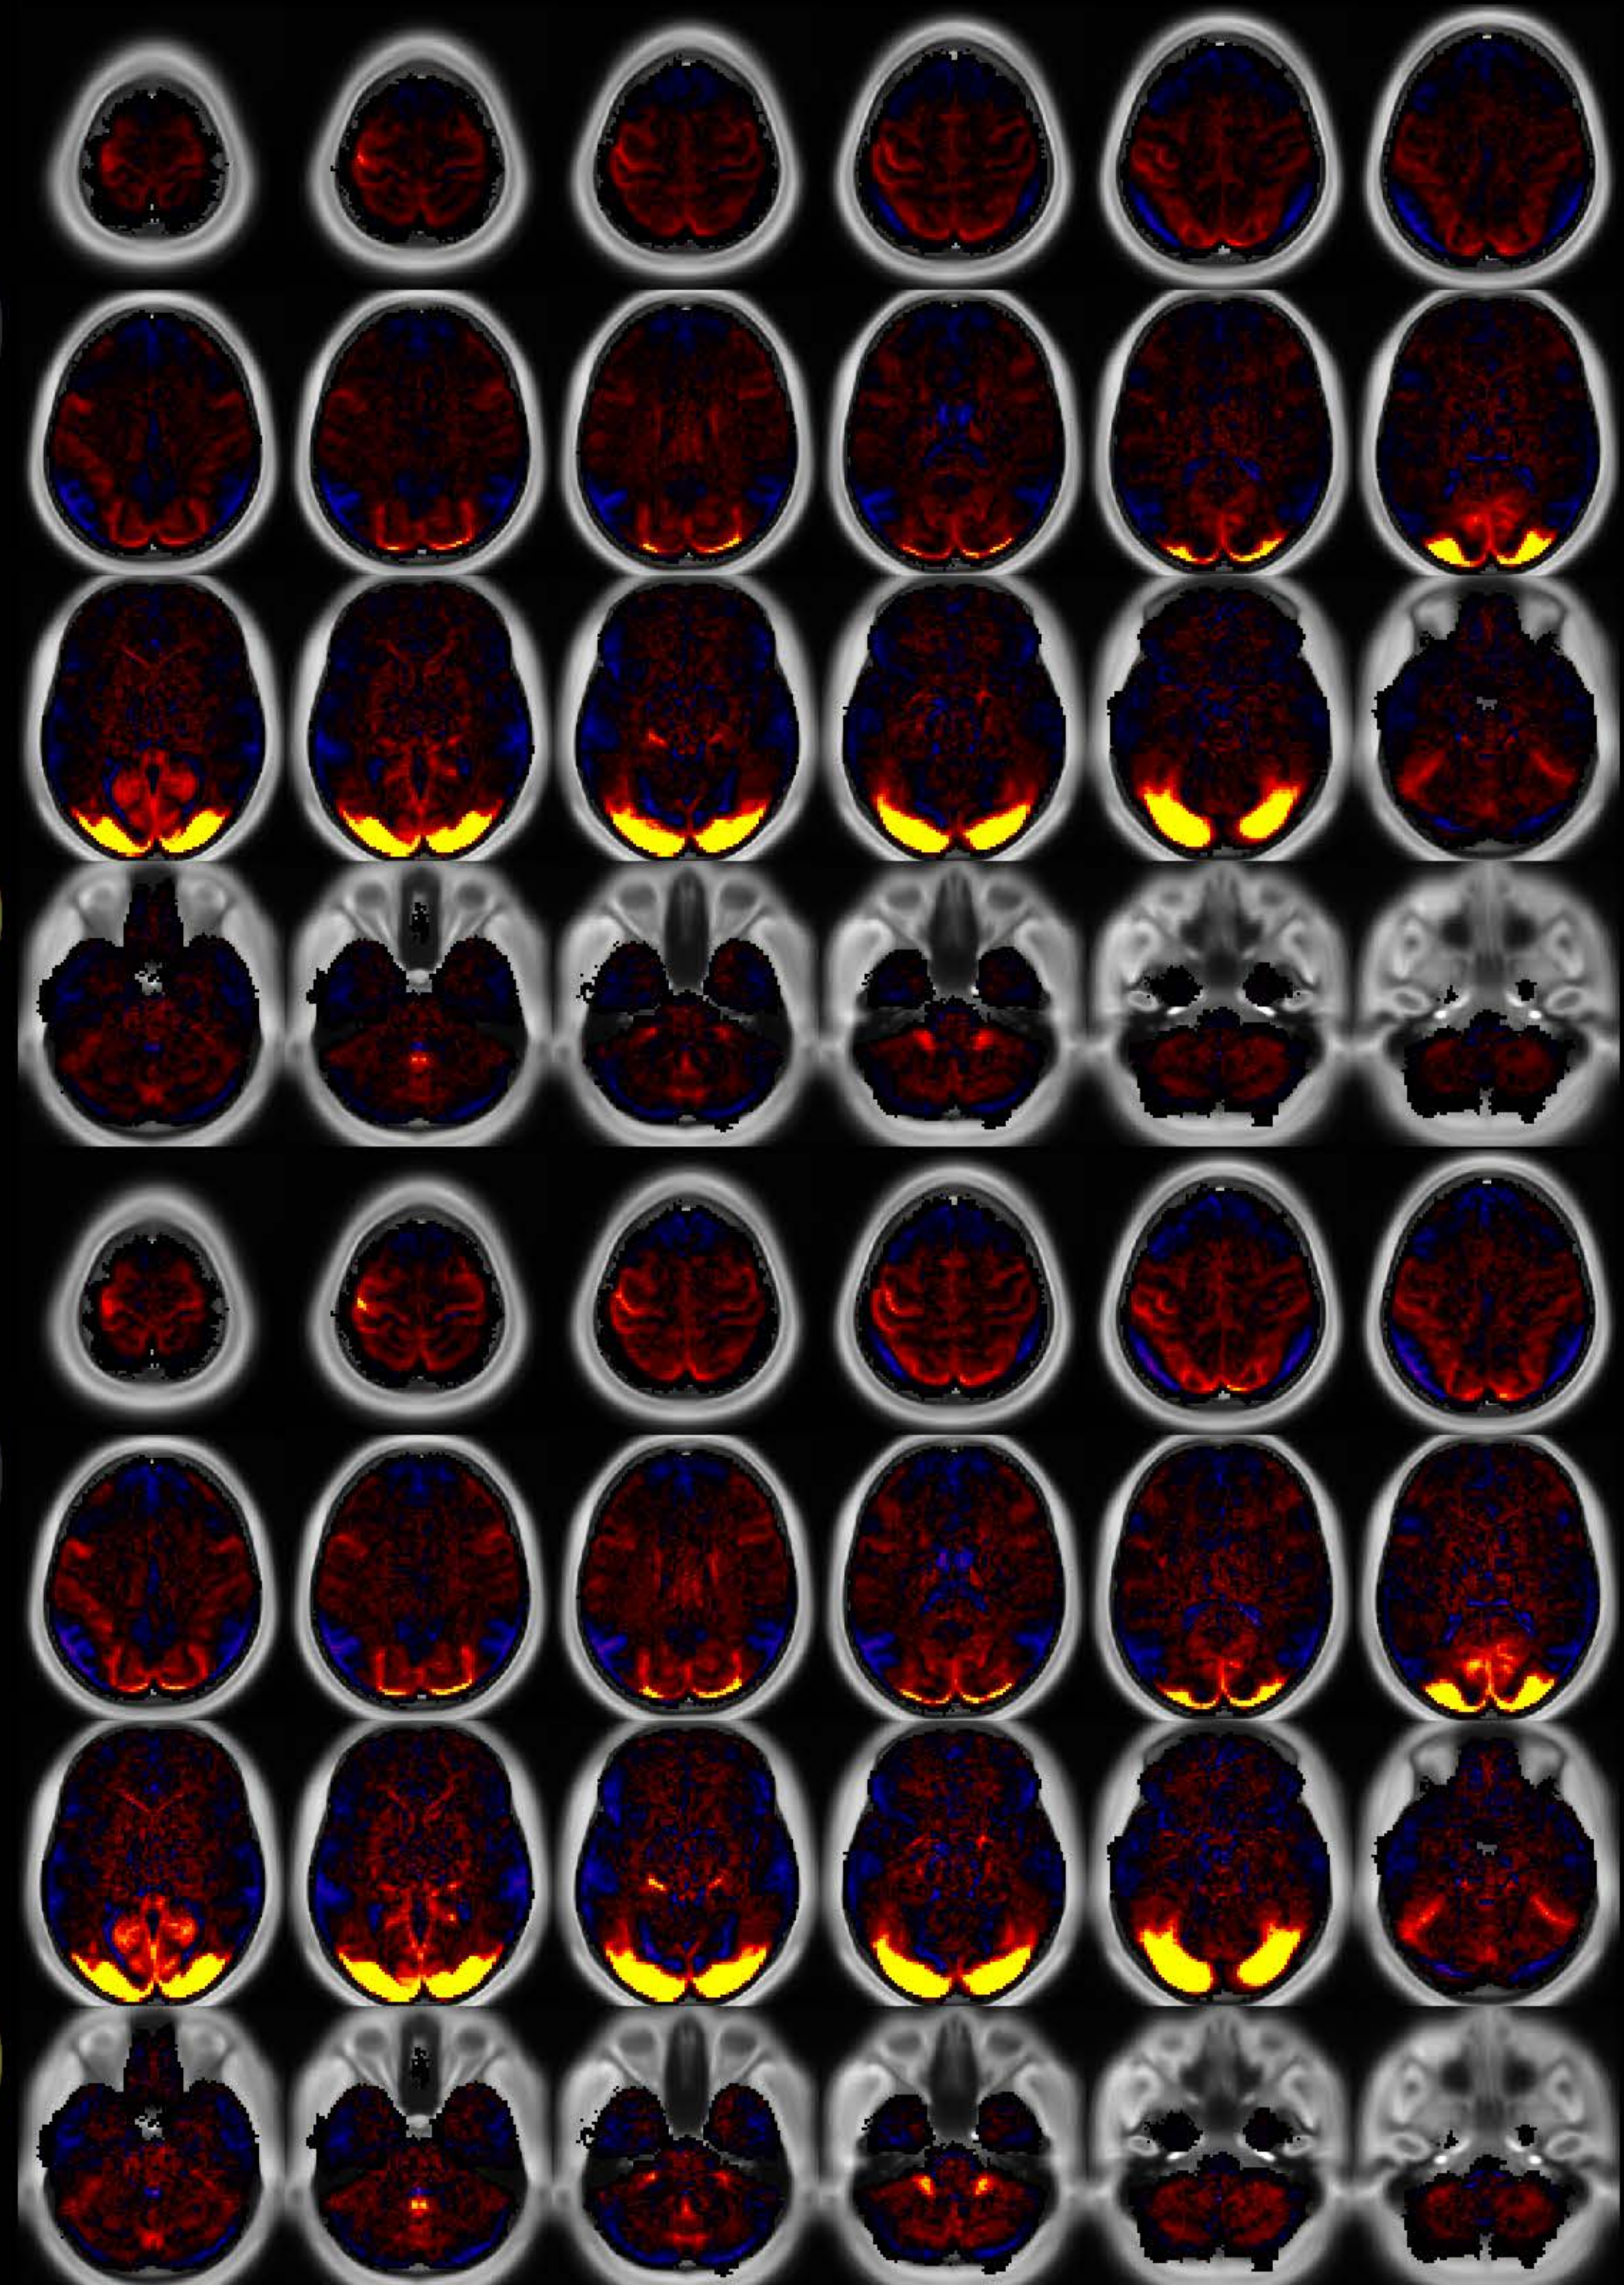

Seconds

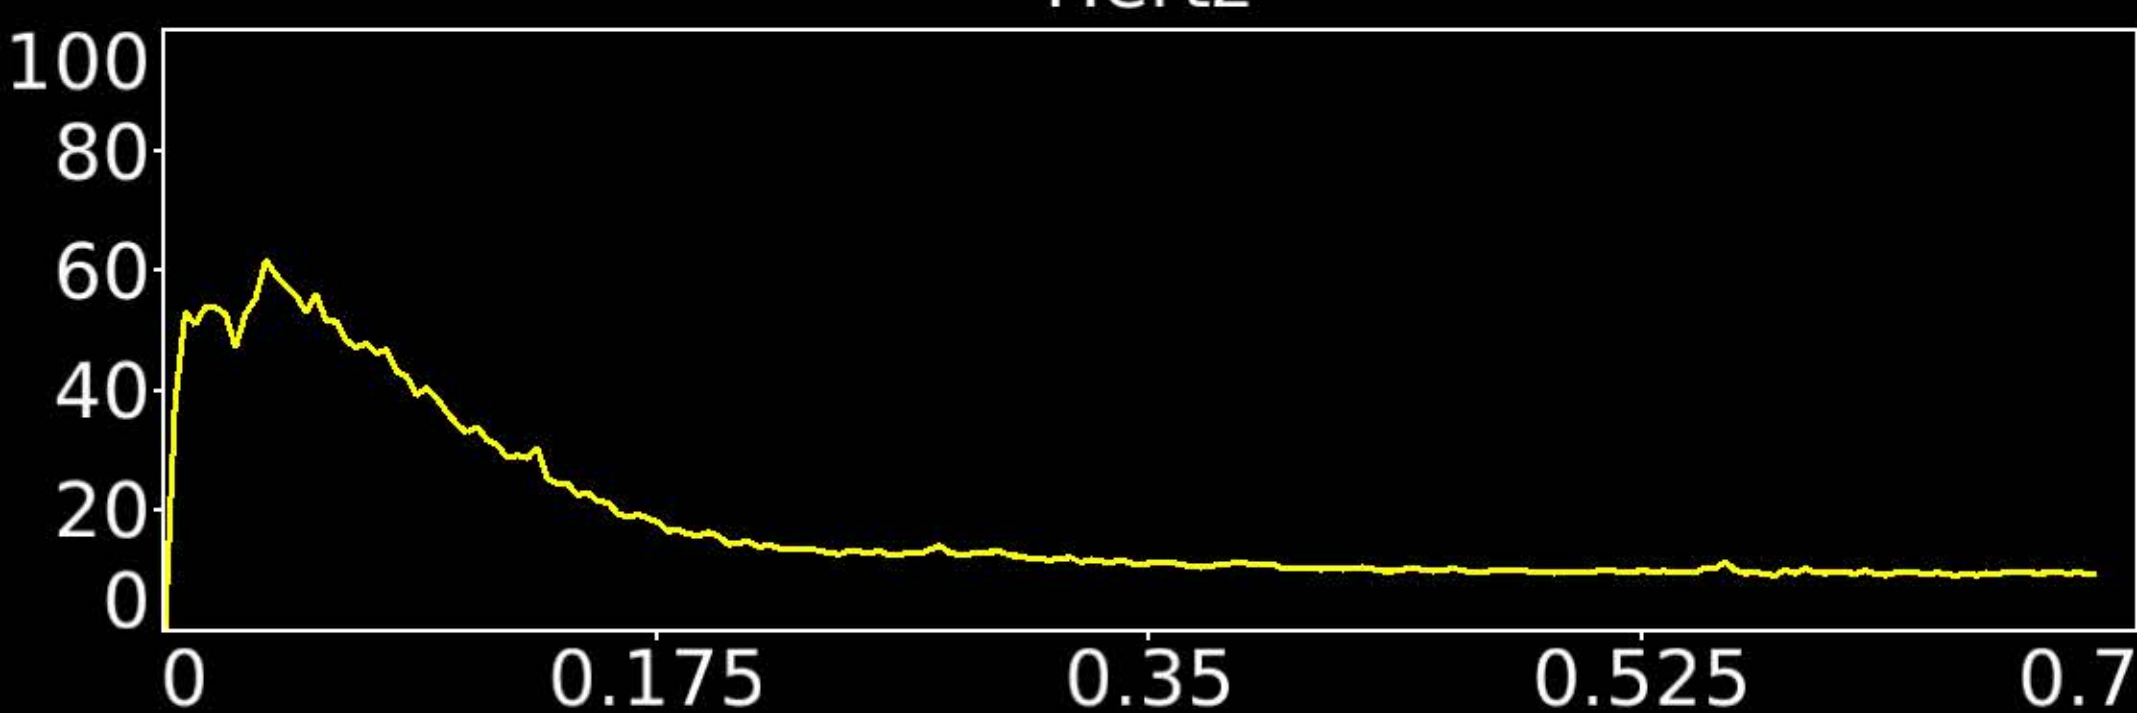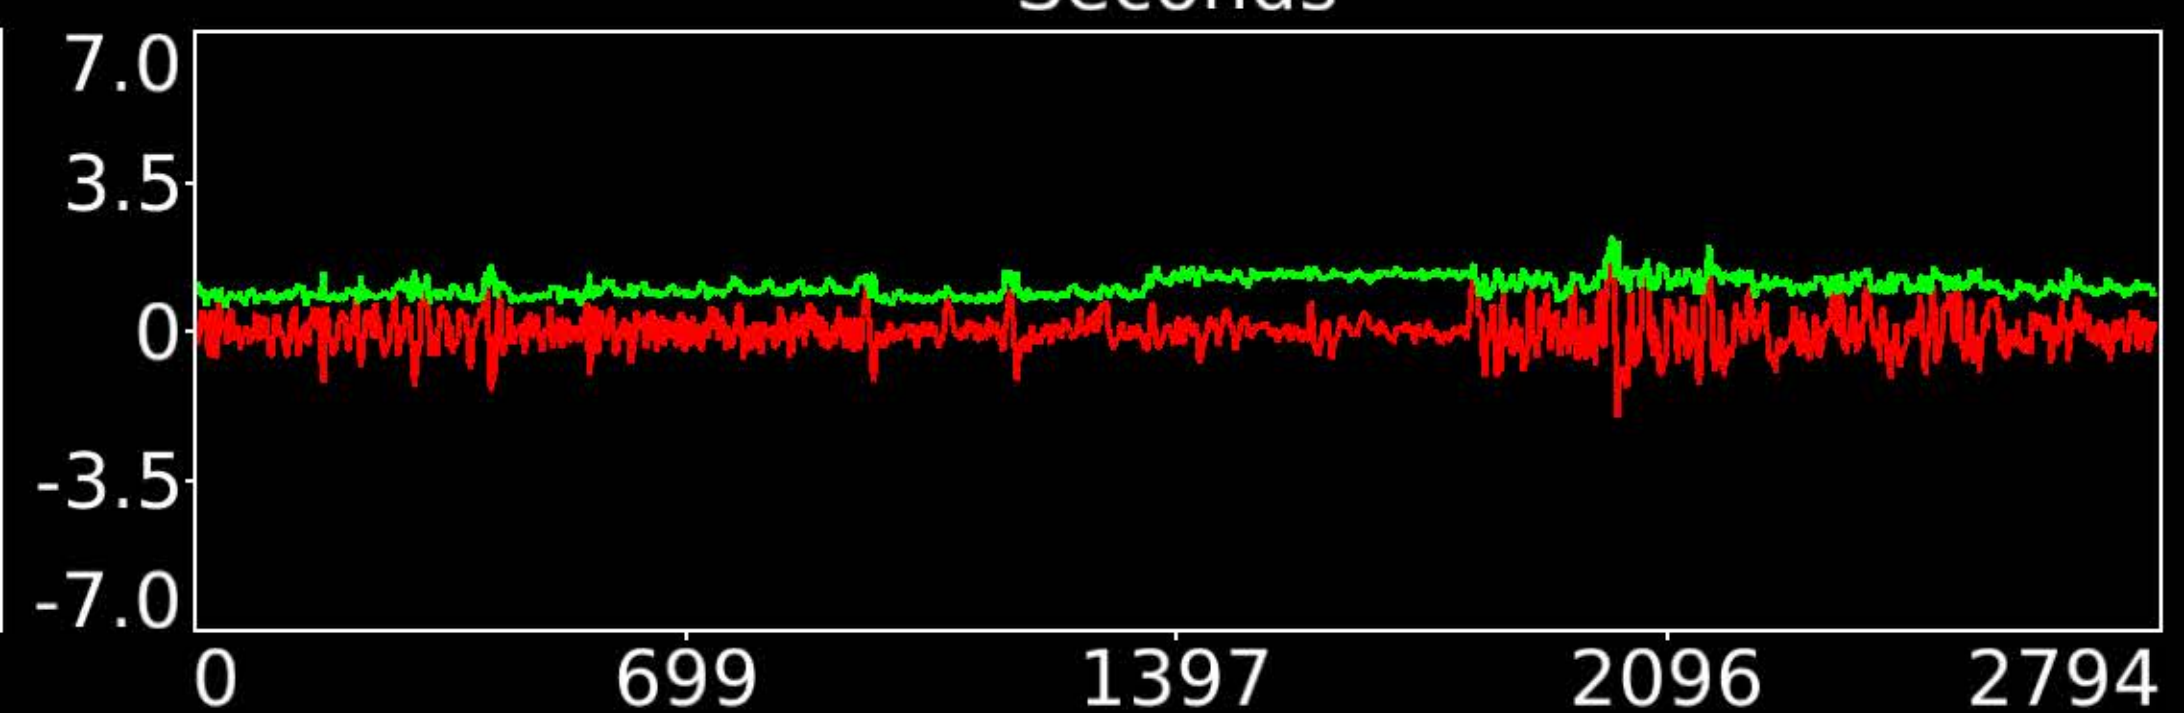

|                           |                            |                             |  |
|---------------------------|----------------------------|-----------------------------|--|
| Number & Class: 15 Signal |                            | Name: Foveal Visual         |  |
| RVT Correlated: No        | DVARS Dip Associated: No   | Cross-Subject Variable: Yes |  |
| Single Subject: No        | % Variance Explained: 2.26 | Globality Index: 1.59       |  |
| Task Component: 34        | Rest Component: 41         | Task Modulated: Language    |  |

Rationale: Spatial map includes positive and negative patches that respect known retinotopic visual organization (Foveal vs ParaCentral)



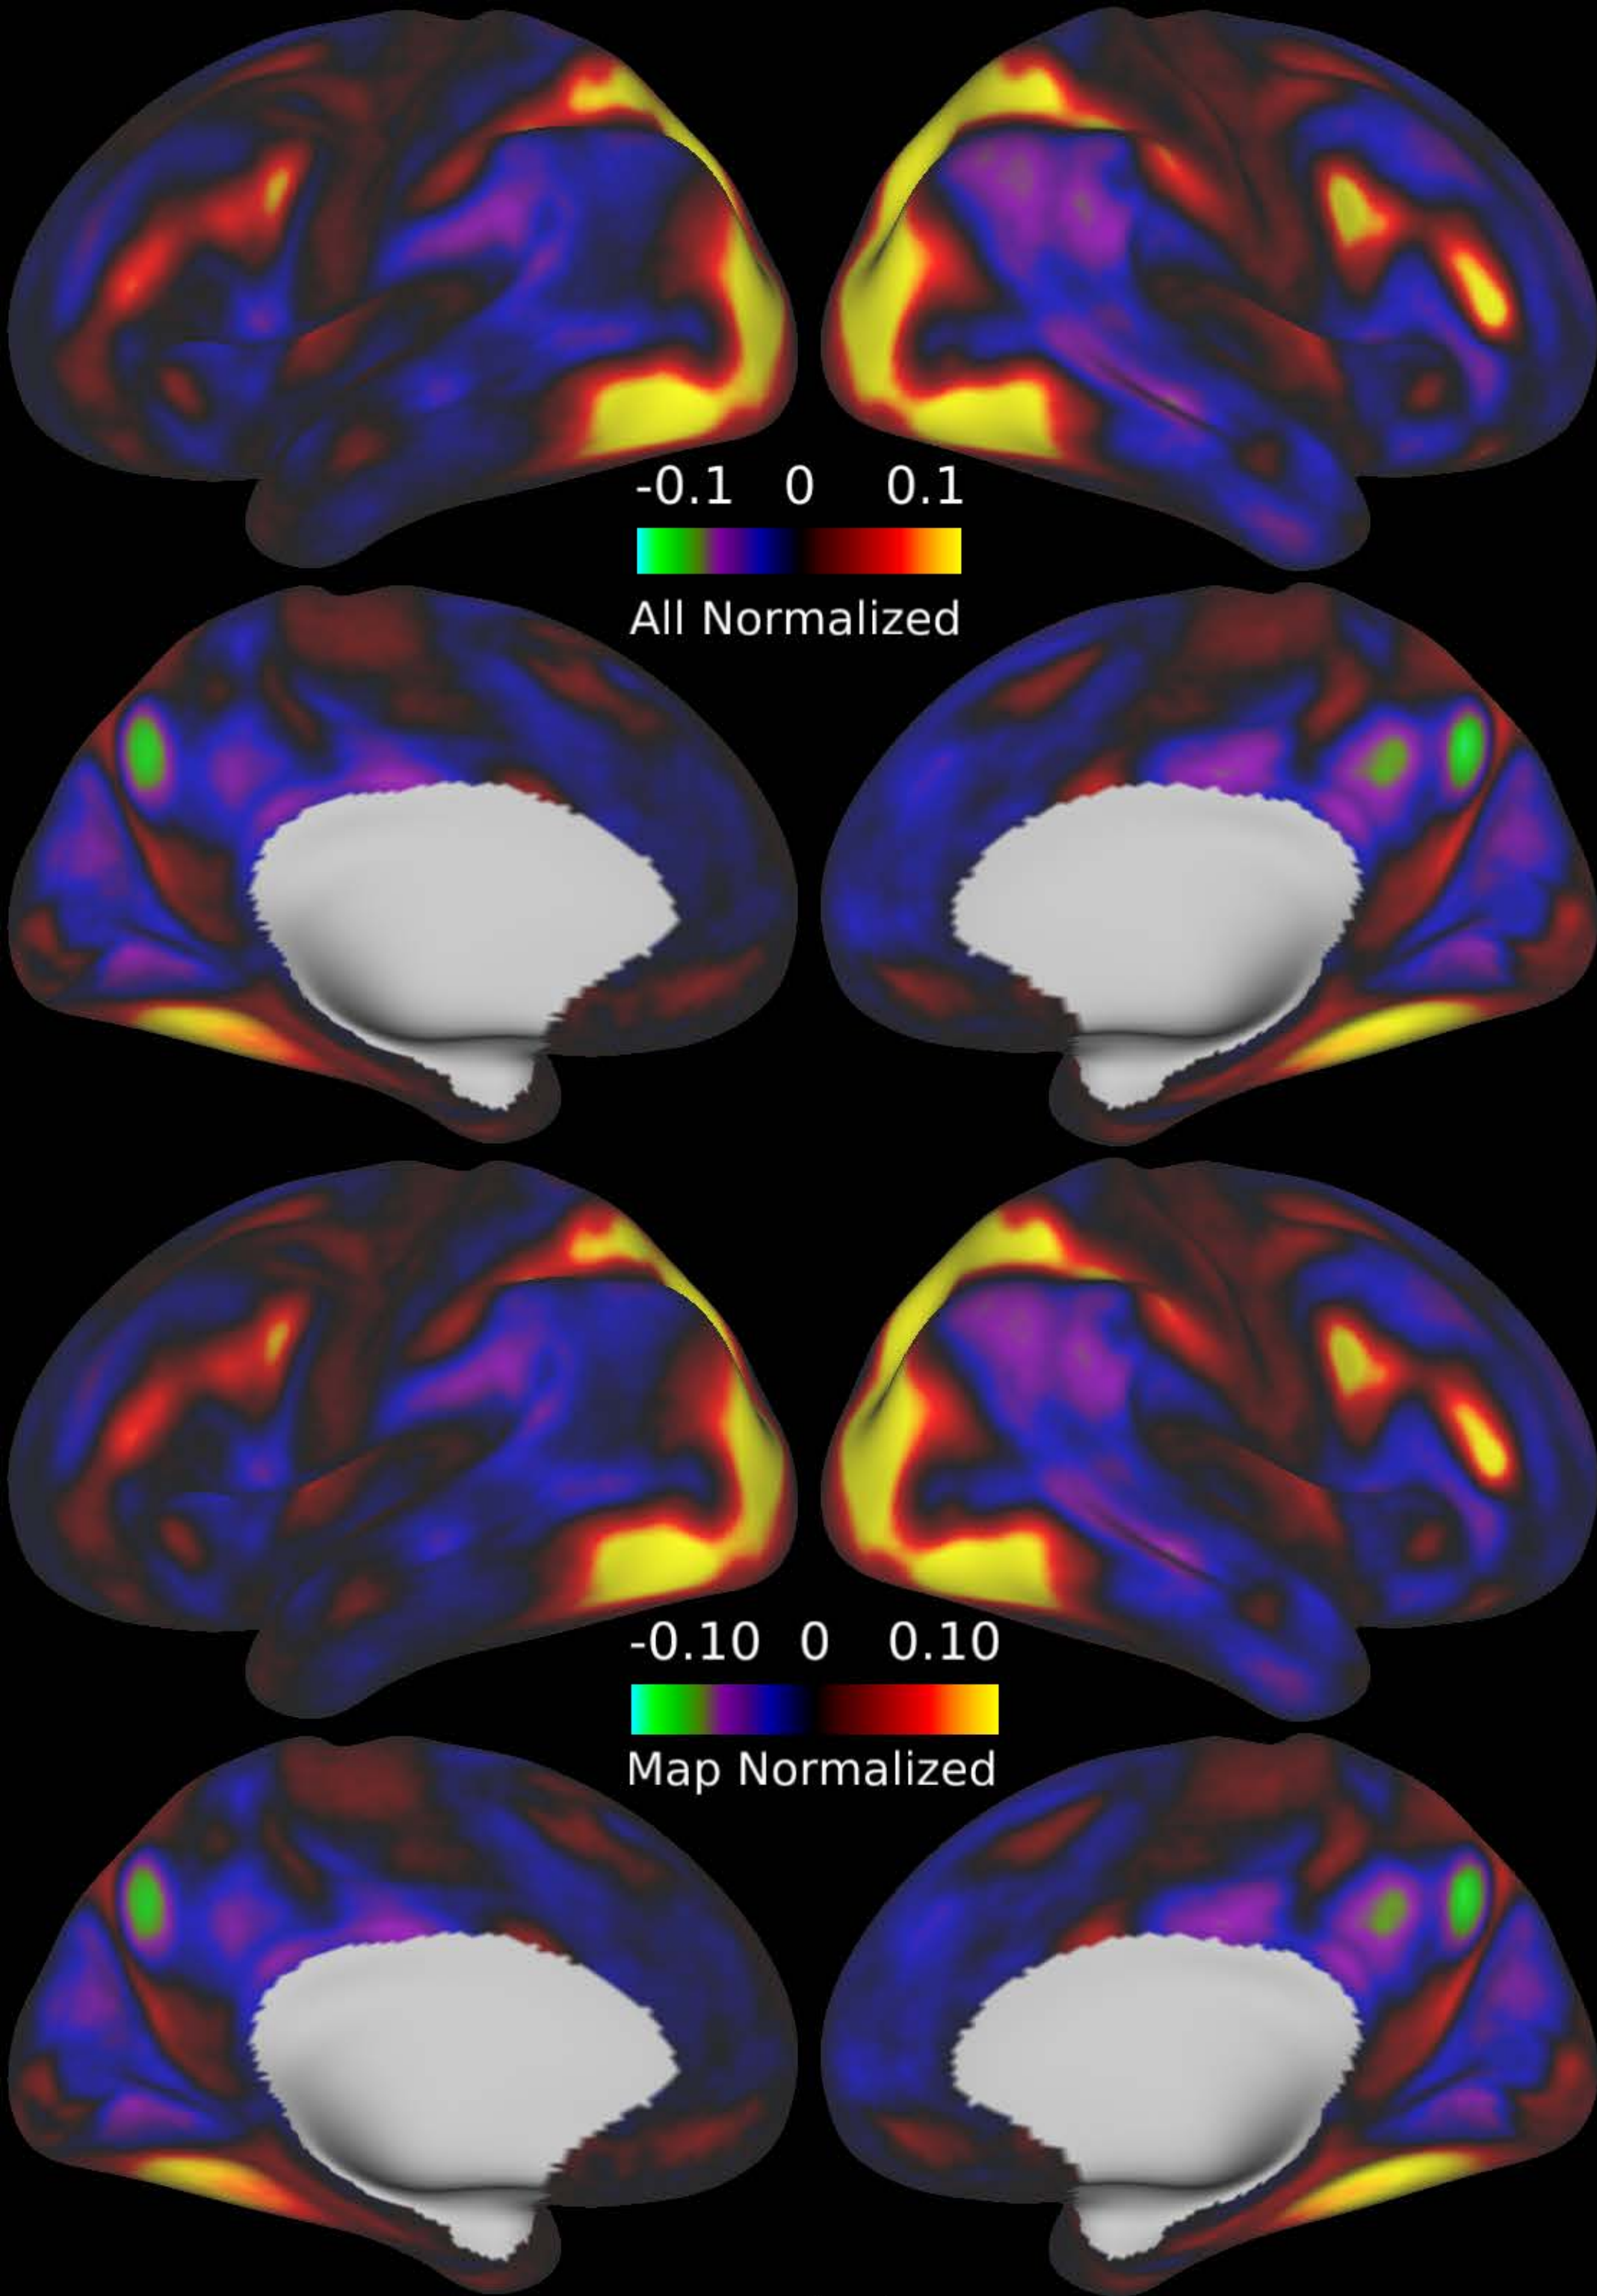

Hertz

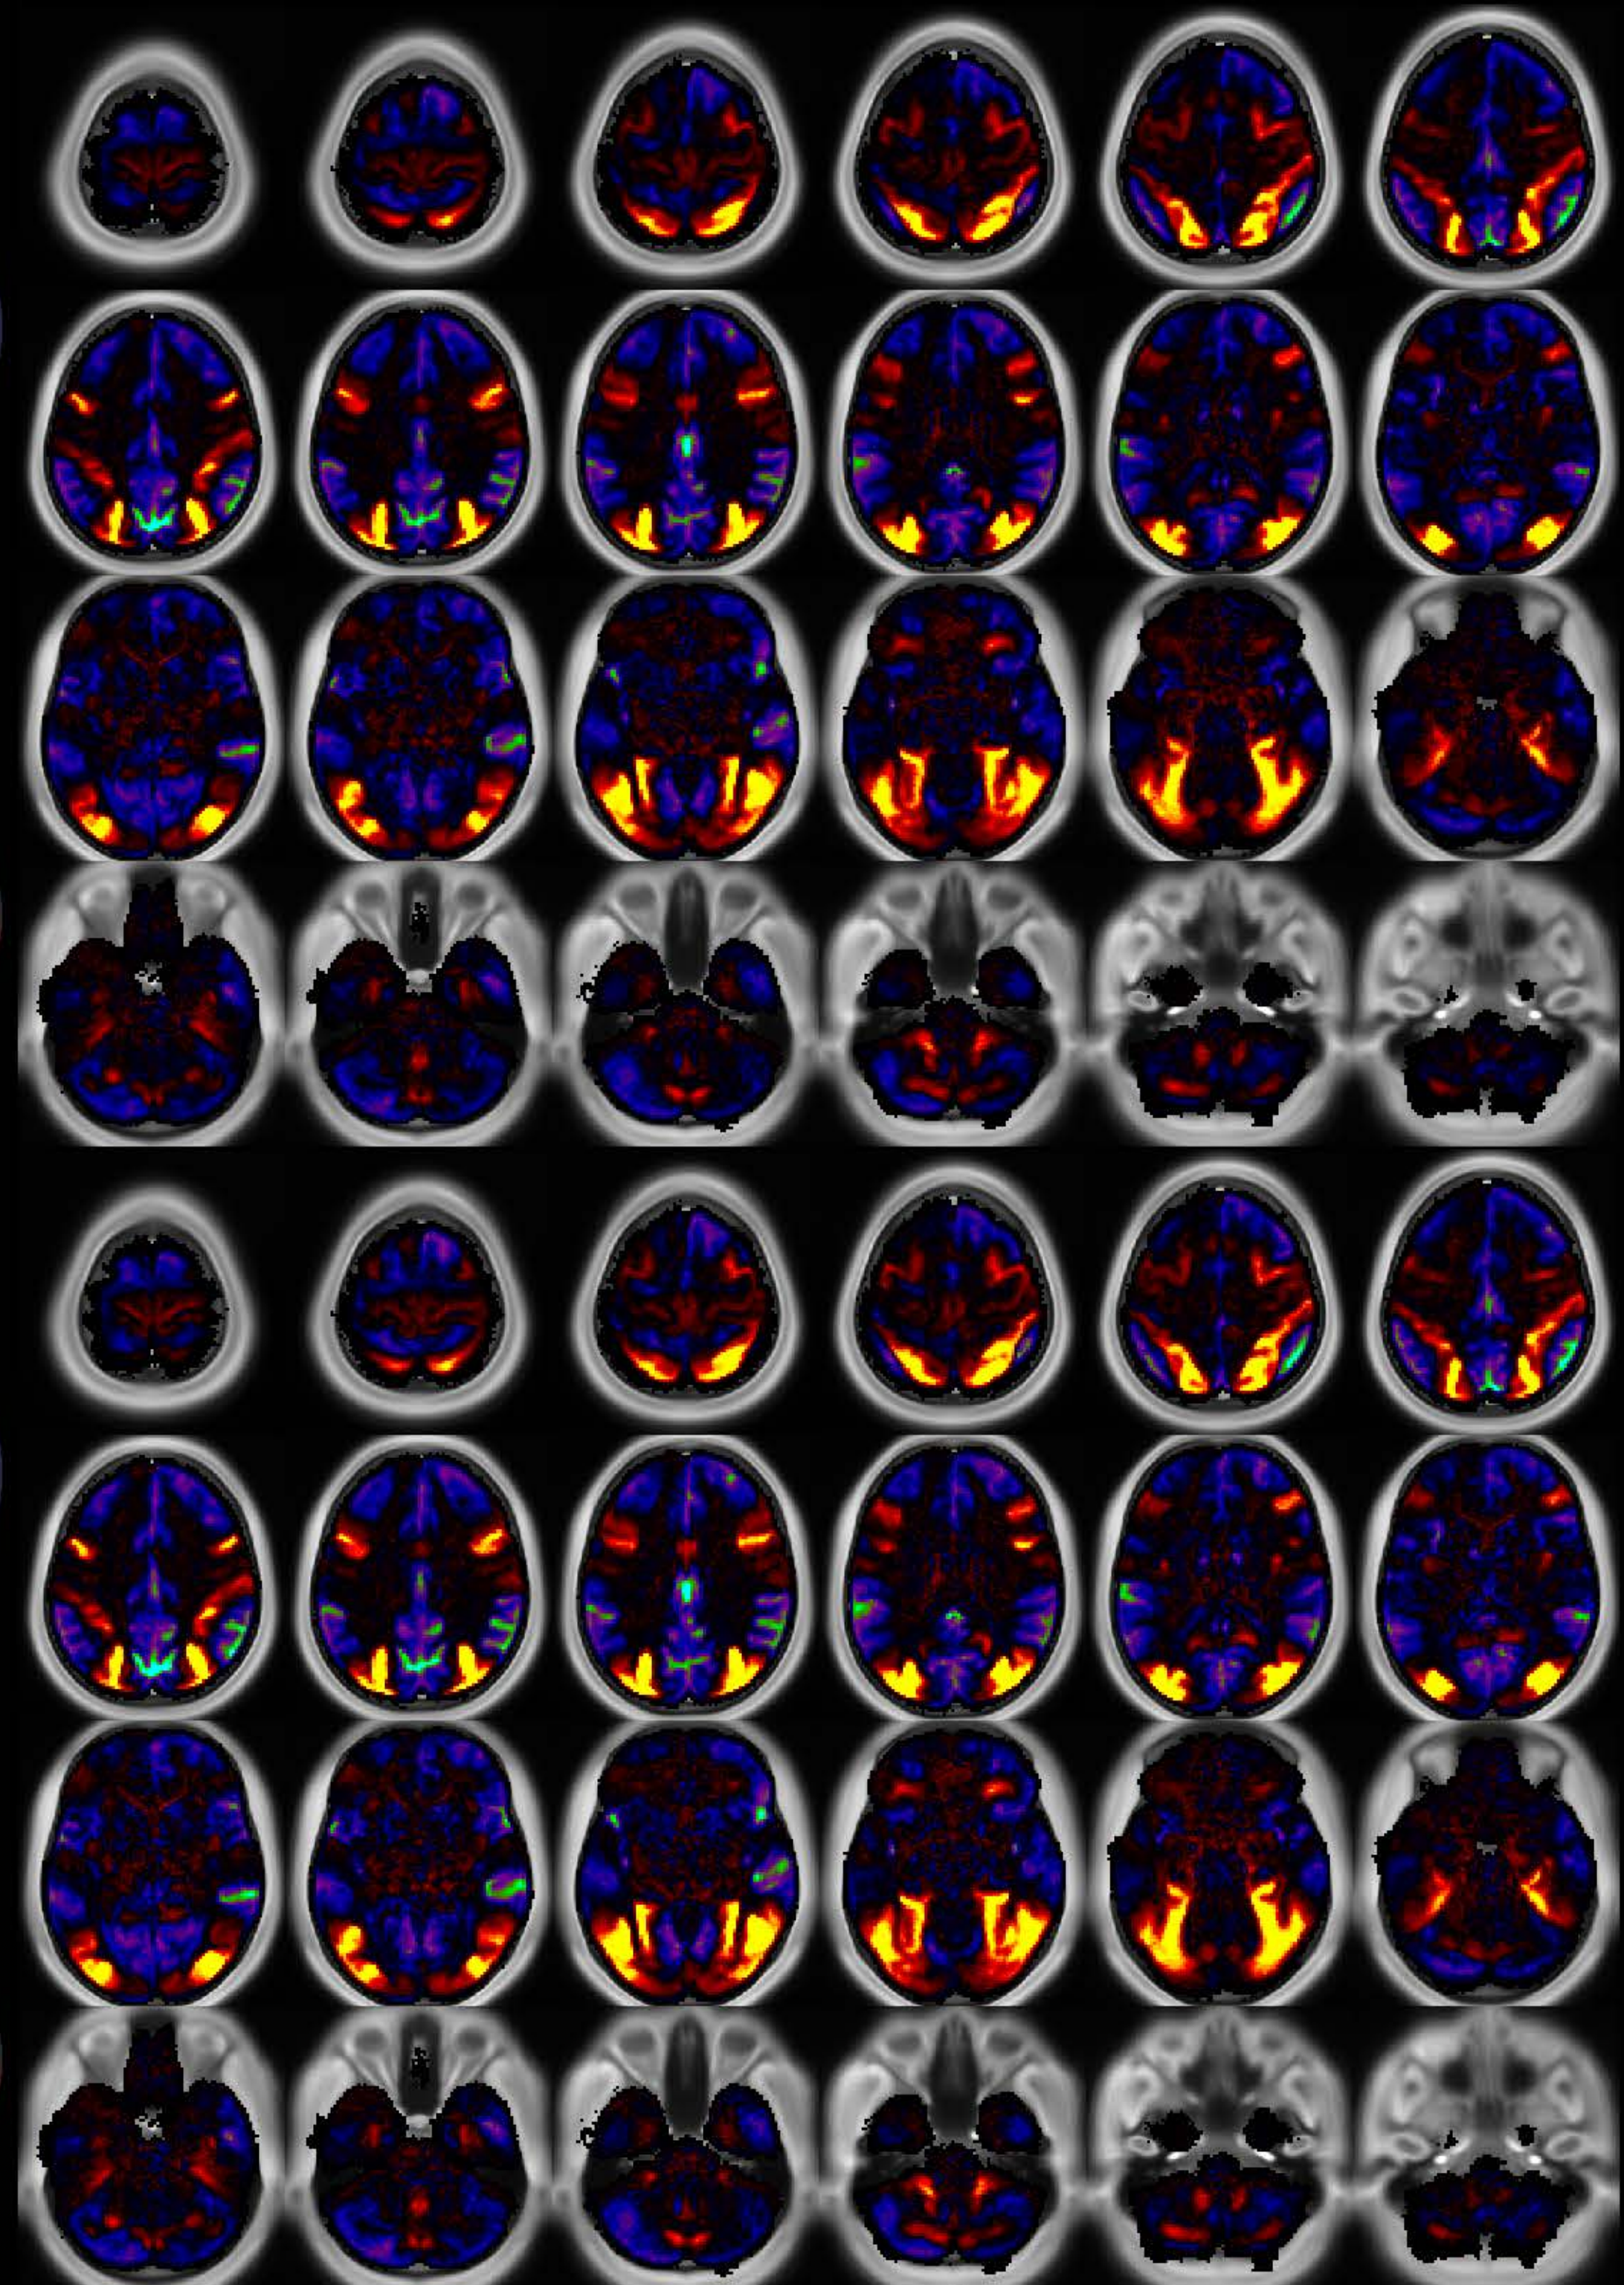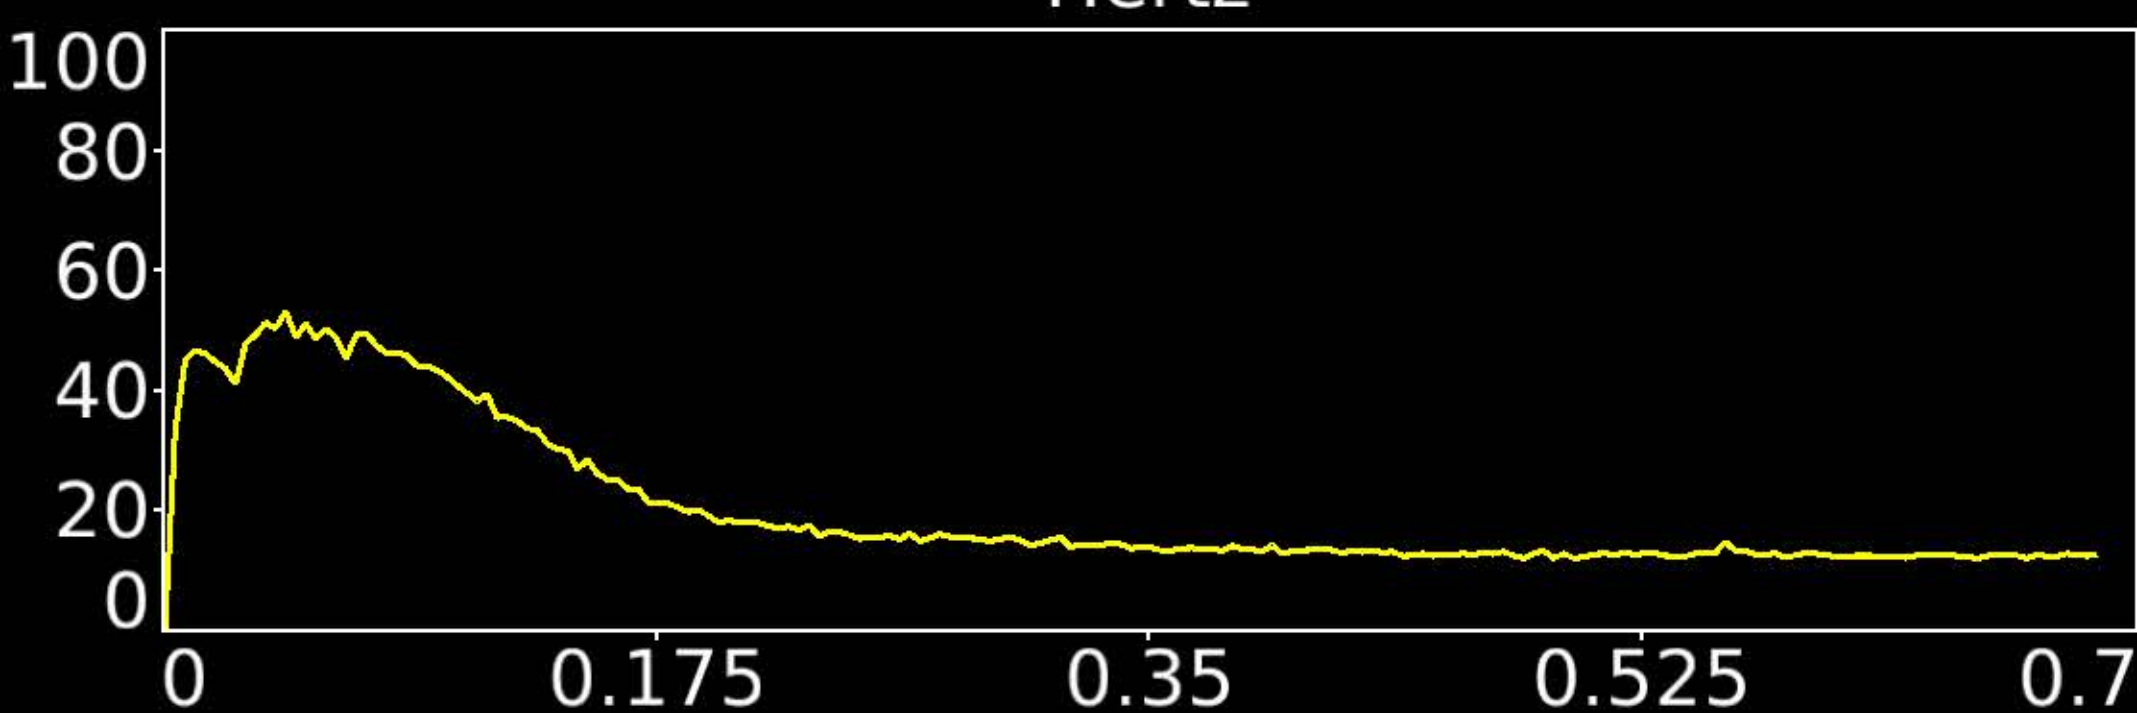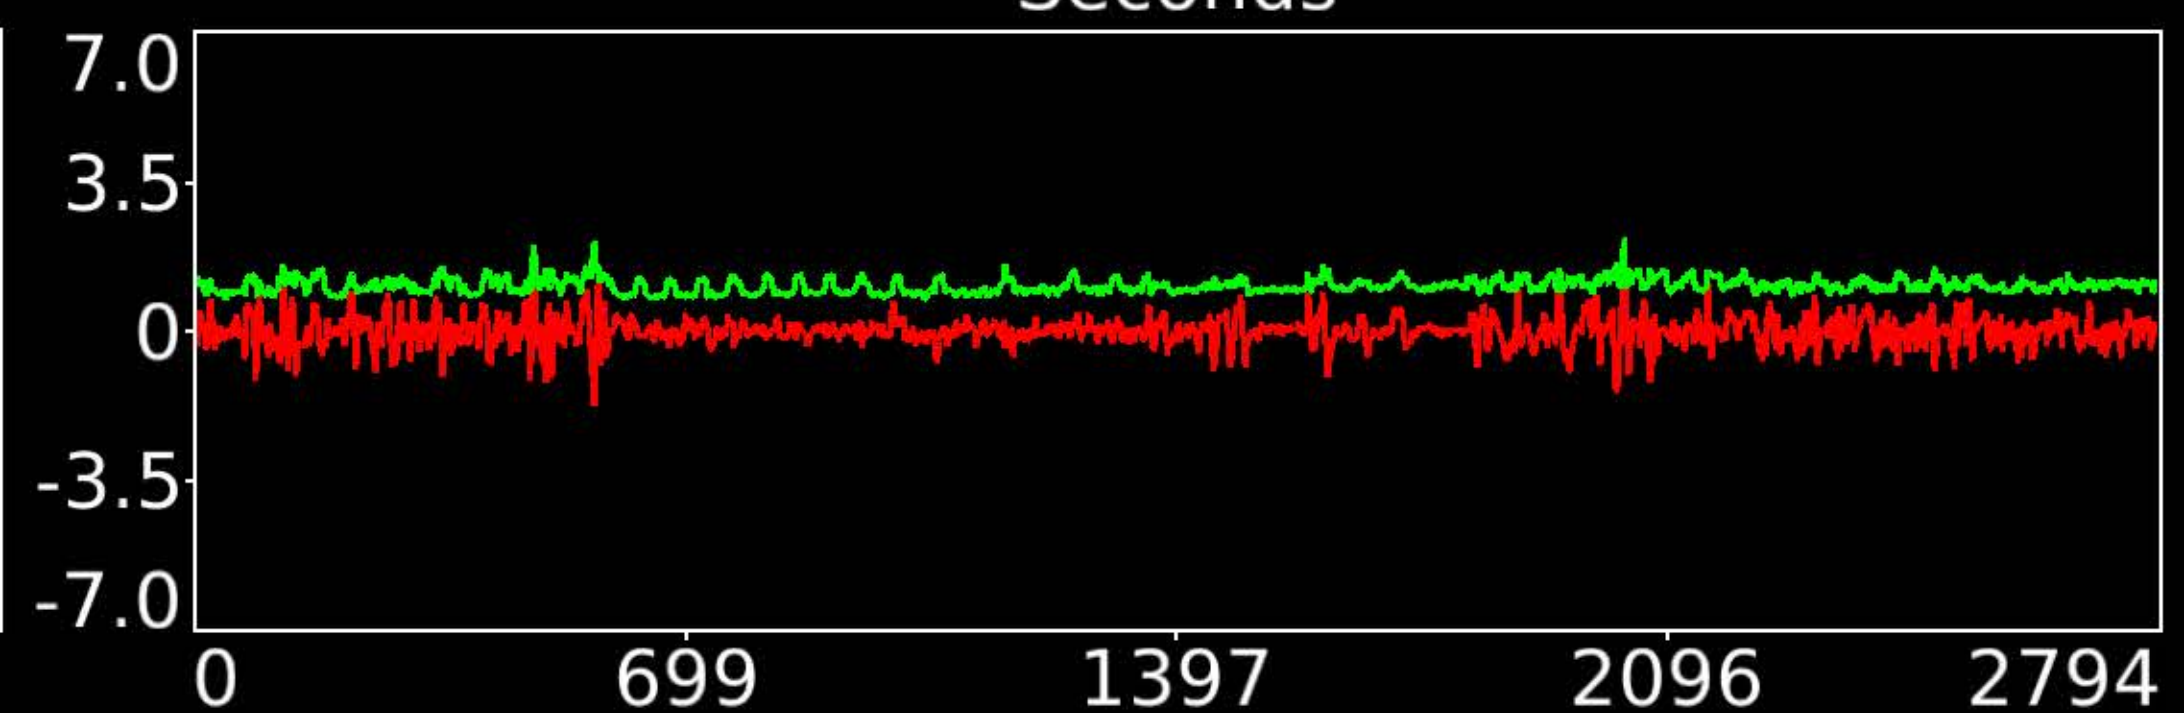

|                                                                                                                       |                            |                            |  |
|-----------------------------------------------------------------------------------------------------------------------|----------------------------|----------------------------|--|
| Number & Class: 16 Signal                                                                                             |                            | Name: Higher Visual        |  |
| RVT Correlated: No                                                                                                    | DVARS Dip Associated: No   | Cross-Subject Variable: No |  |
| Single Subject: No                                                                                                    | % Variance Explained: 2.21 | Globality Index: 0.3       |  |
| Task Component: No                                                                                                    | Rest Component: 18         | Task Modulated: No         |  |
| Rationale: Spatial map includes positive and negative patches that respect known RSNs (e.g. Dorsal Attention Network) |                            |                            |  |



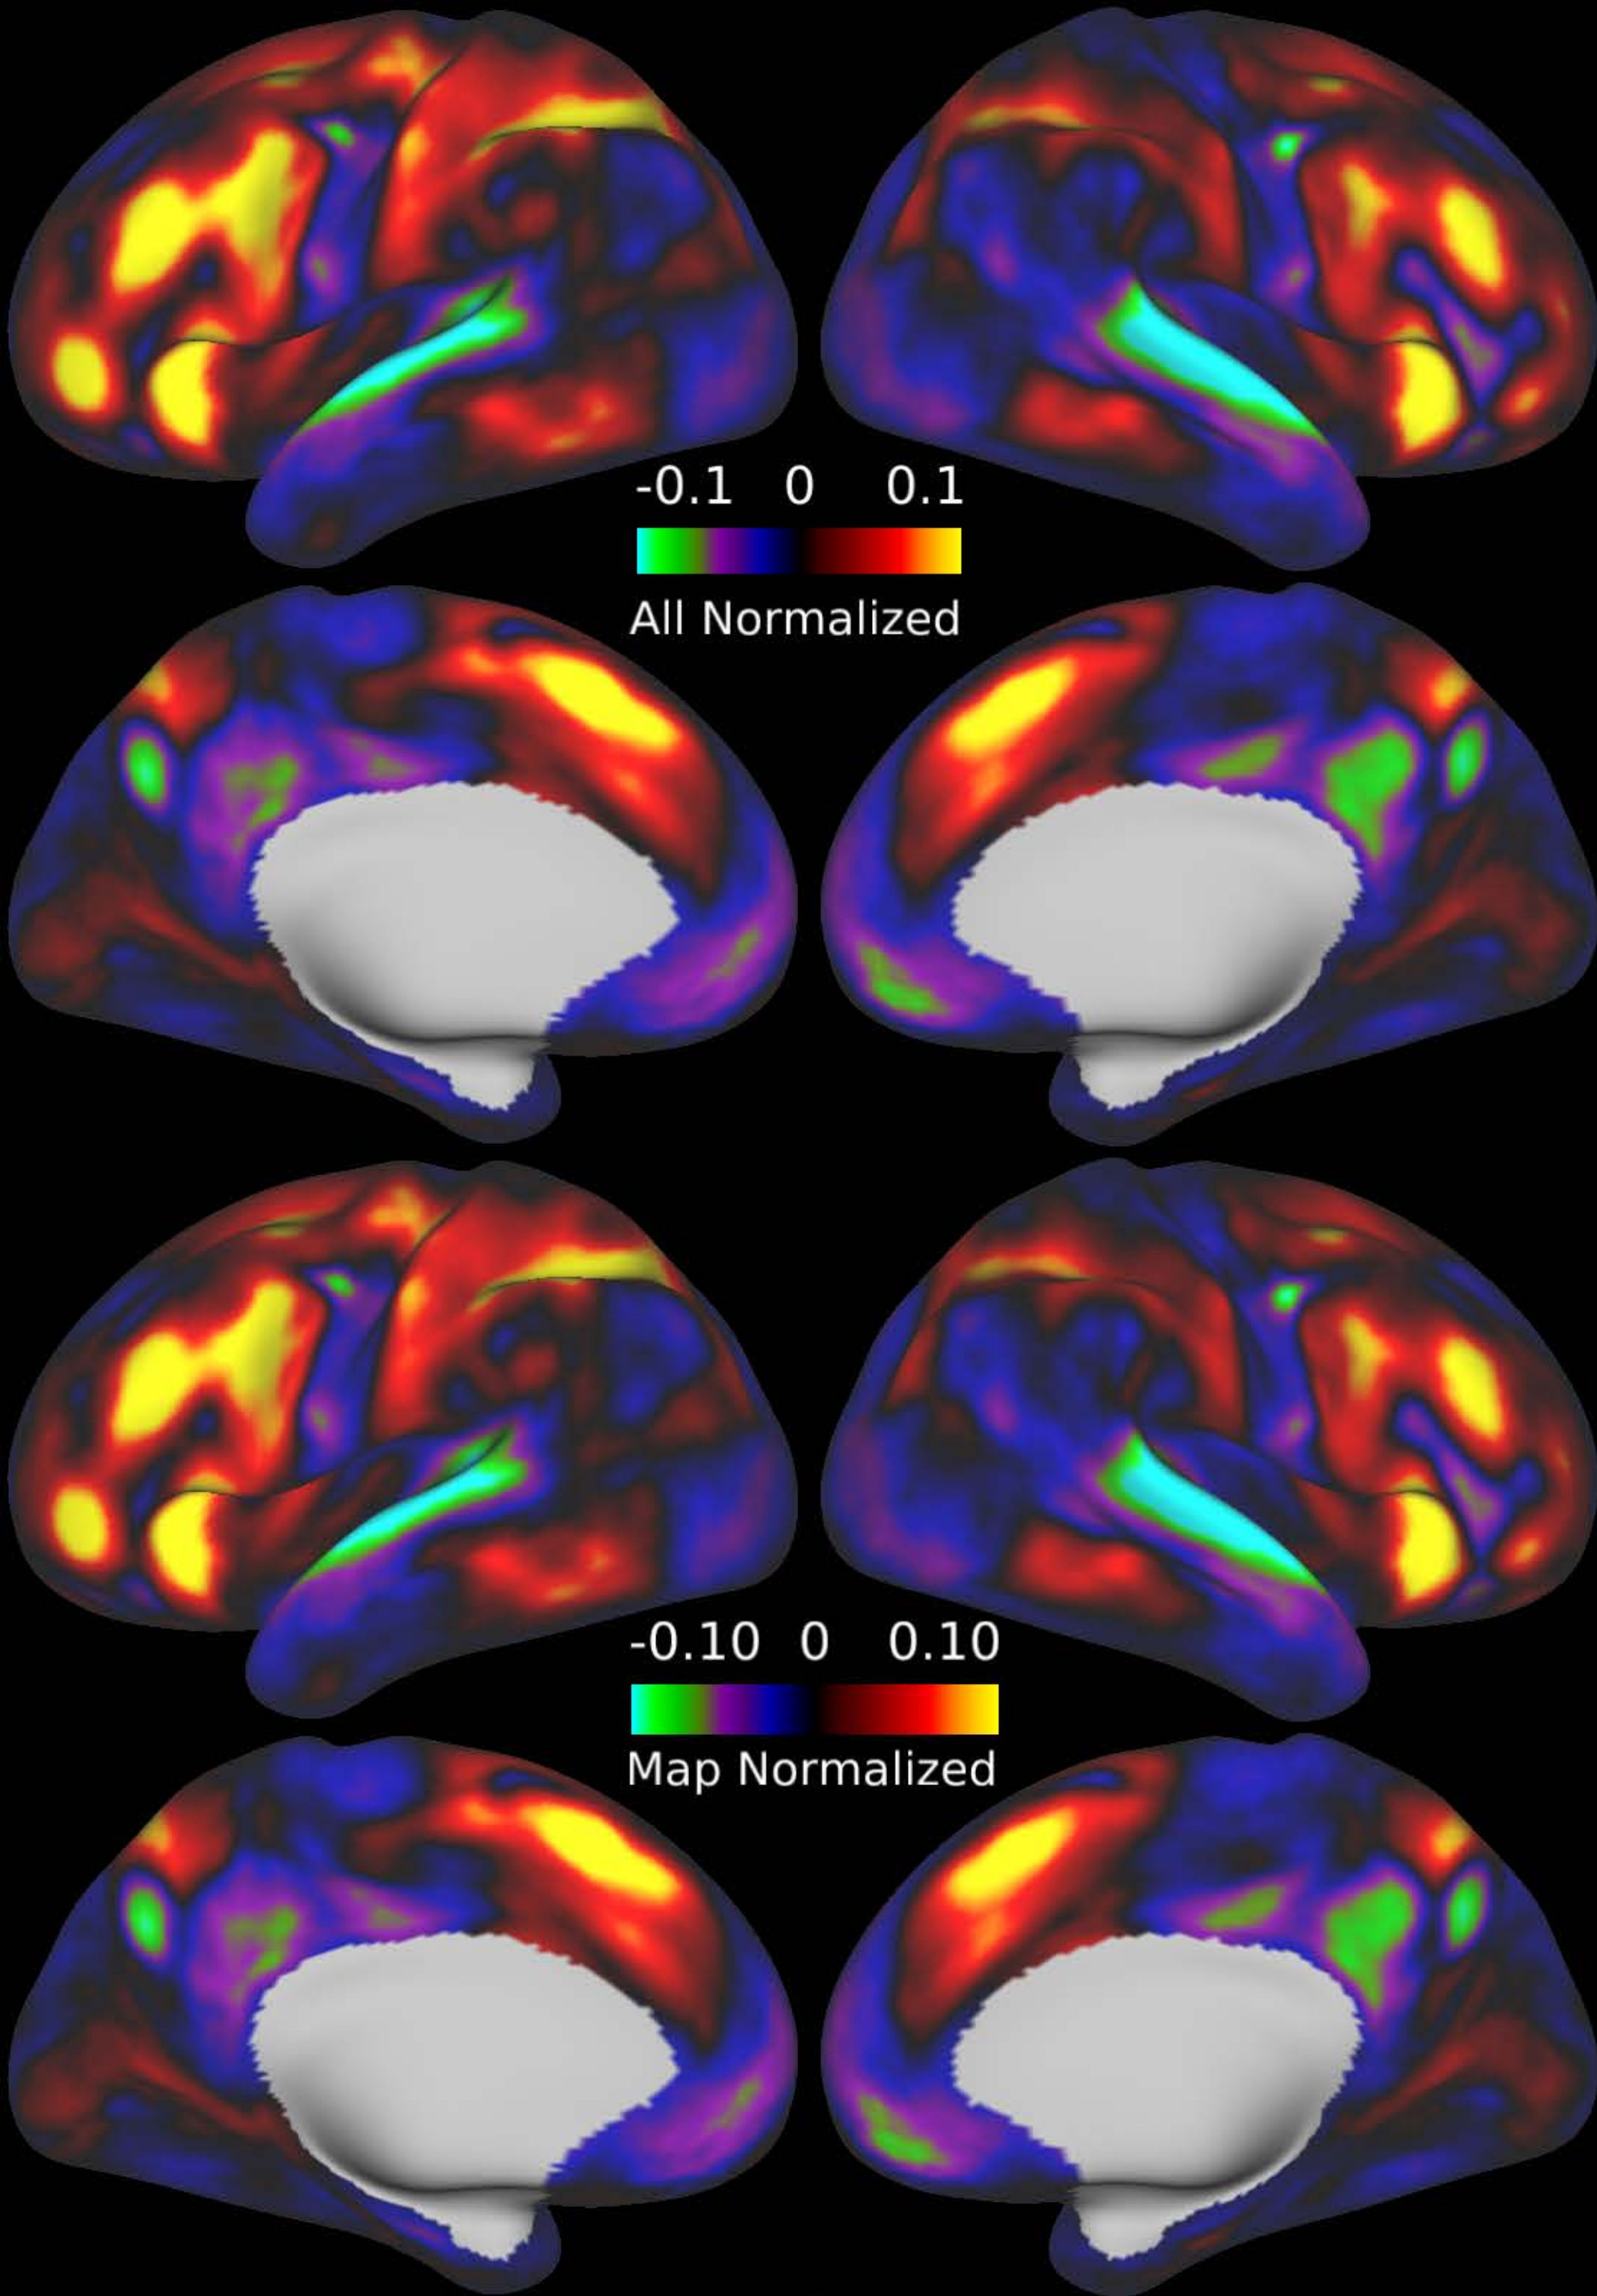

Hertz

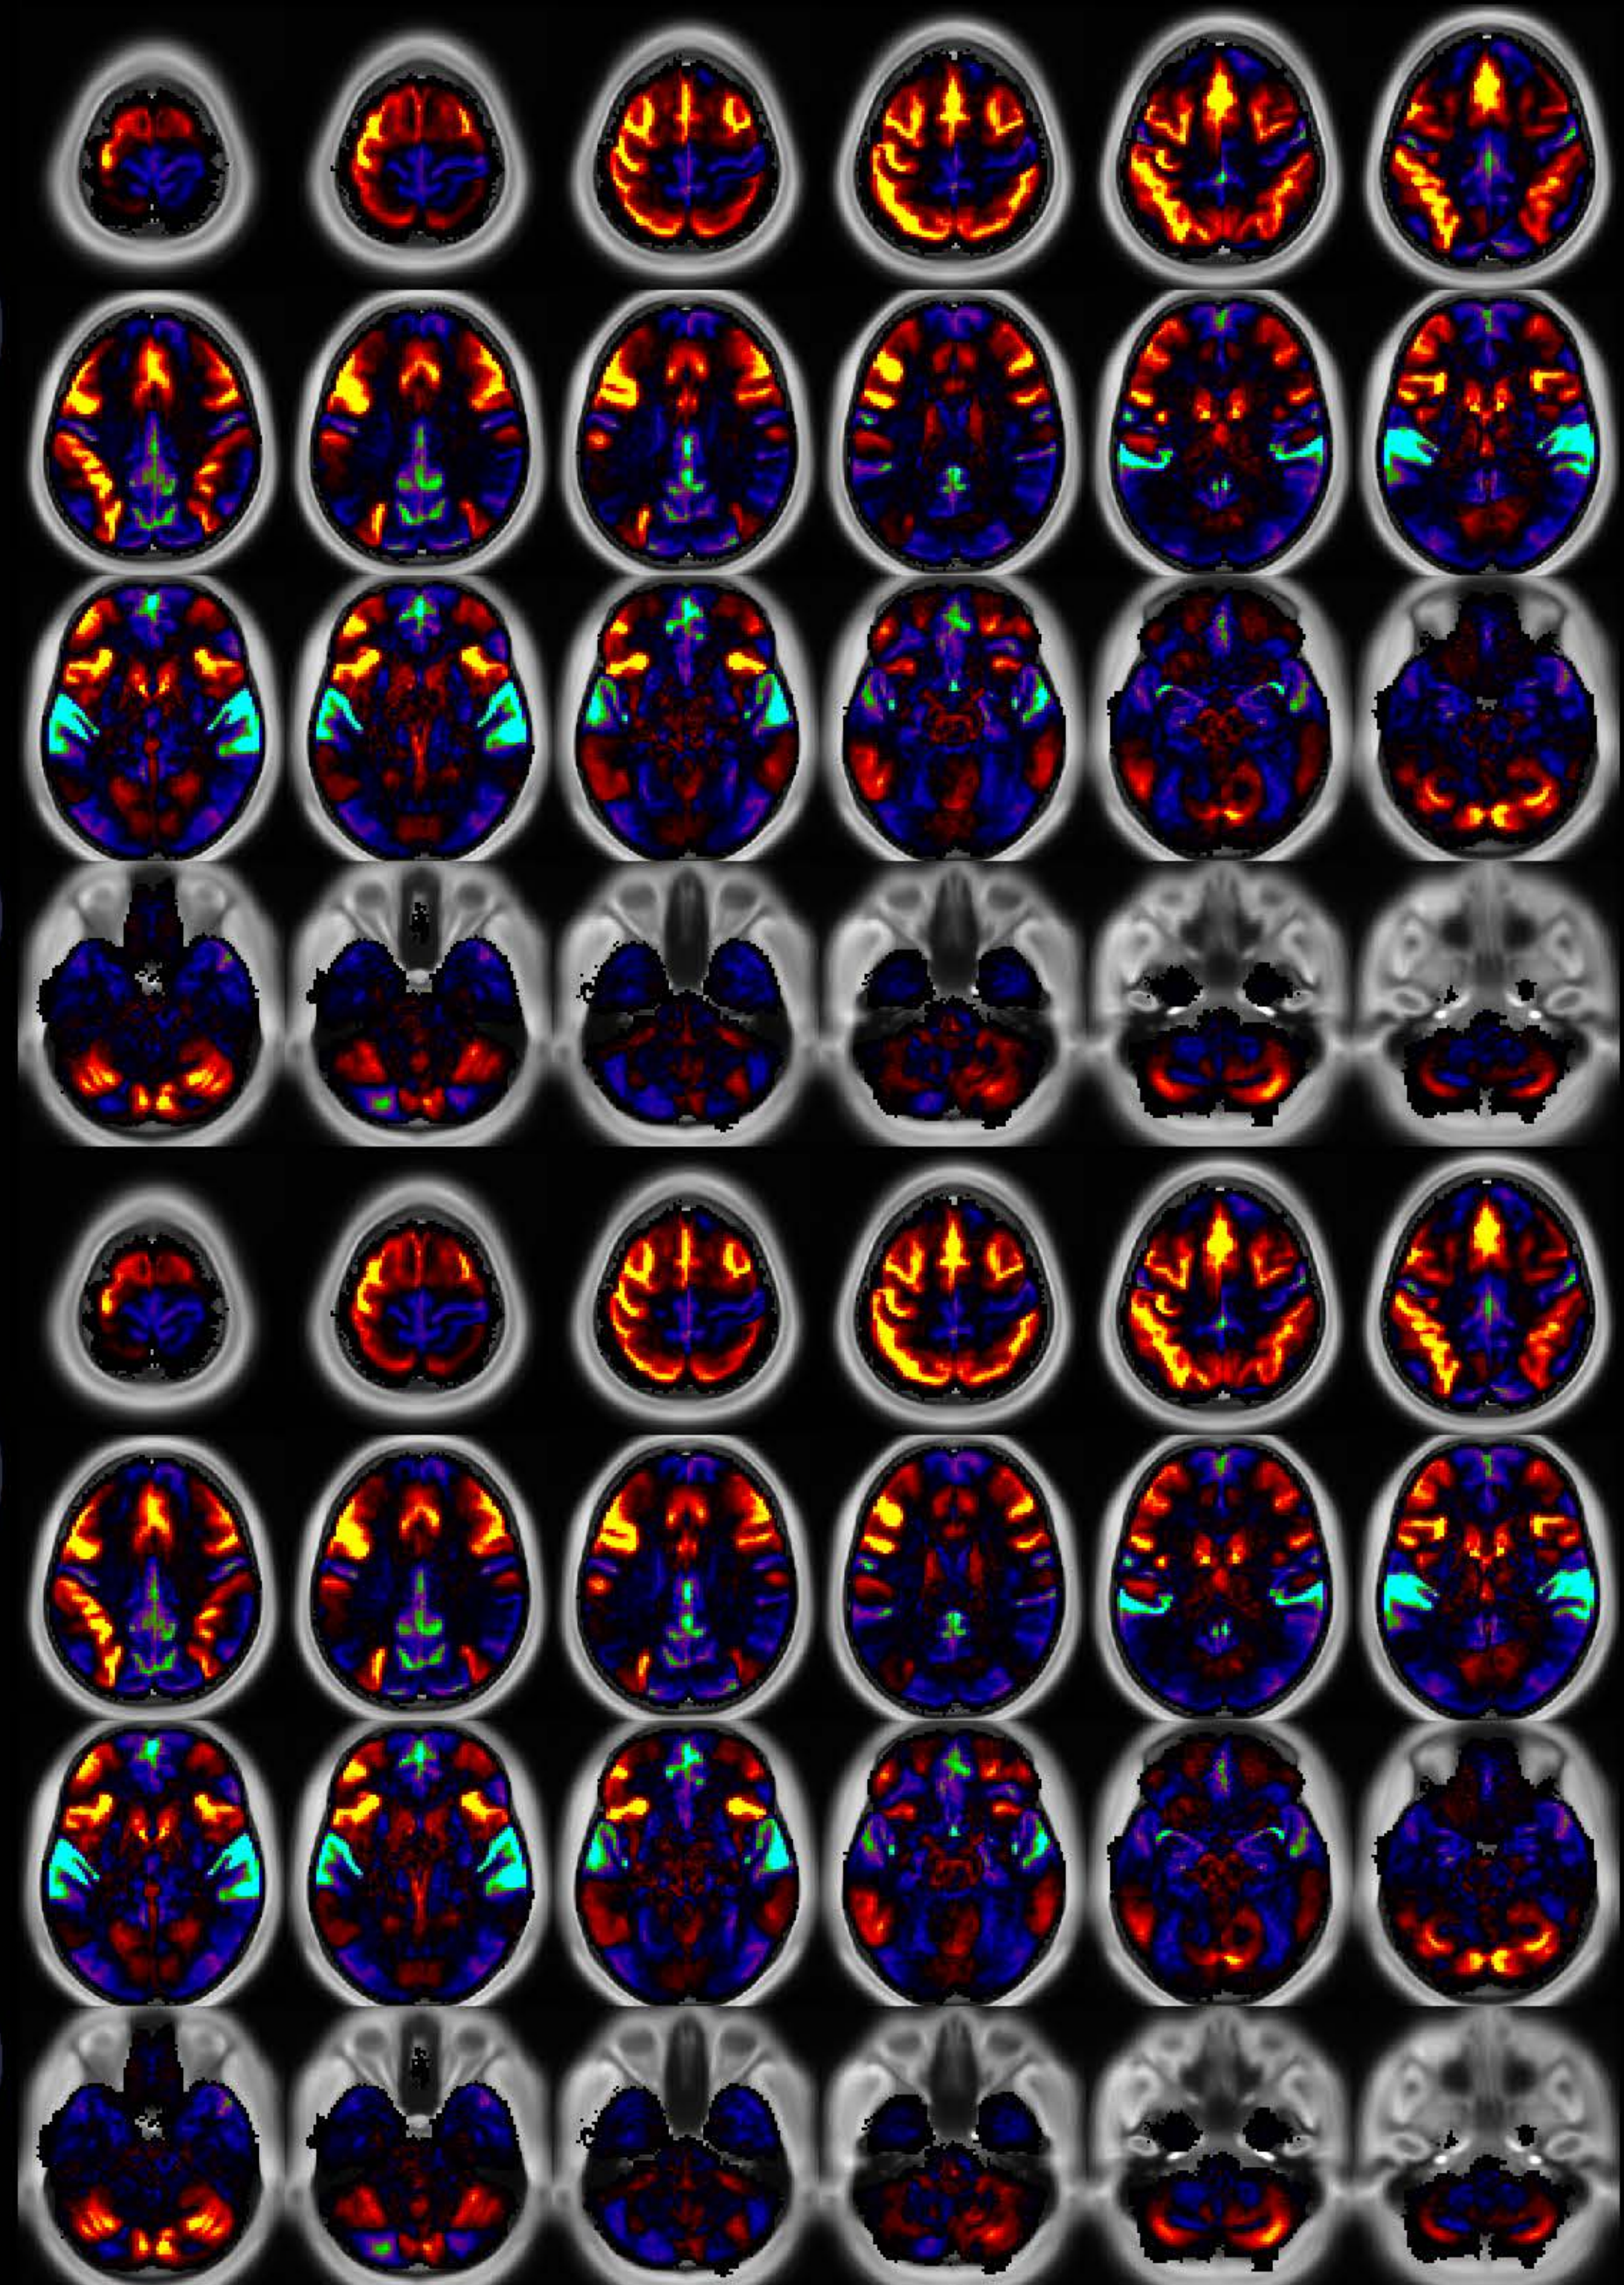

Seconds

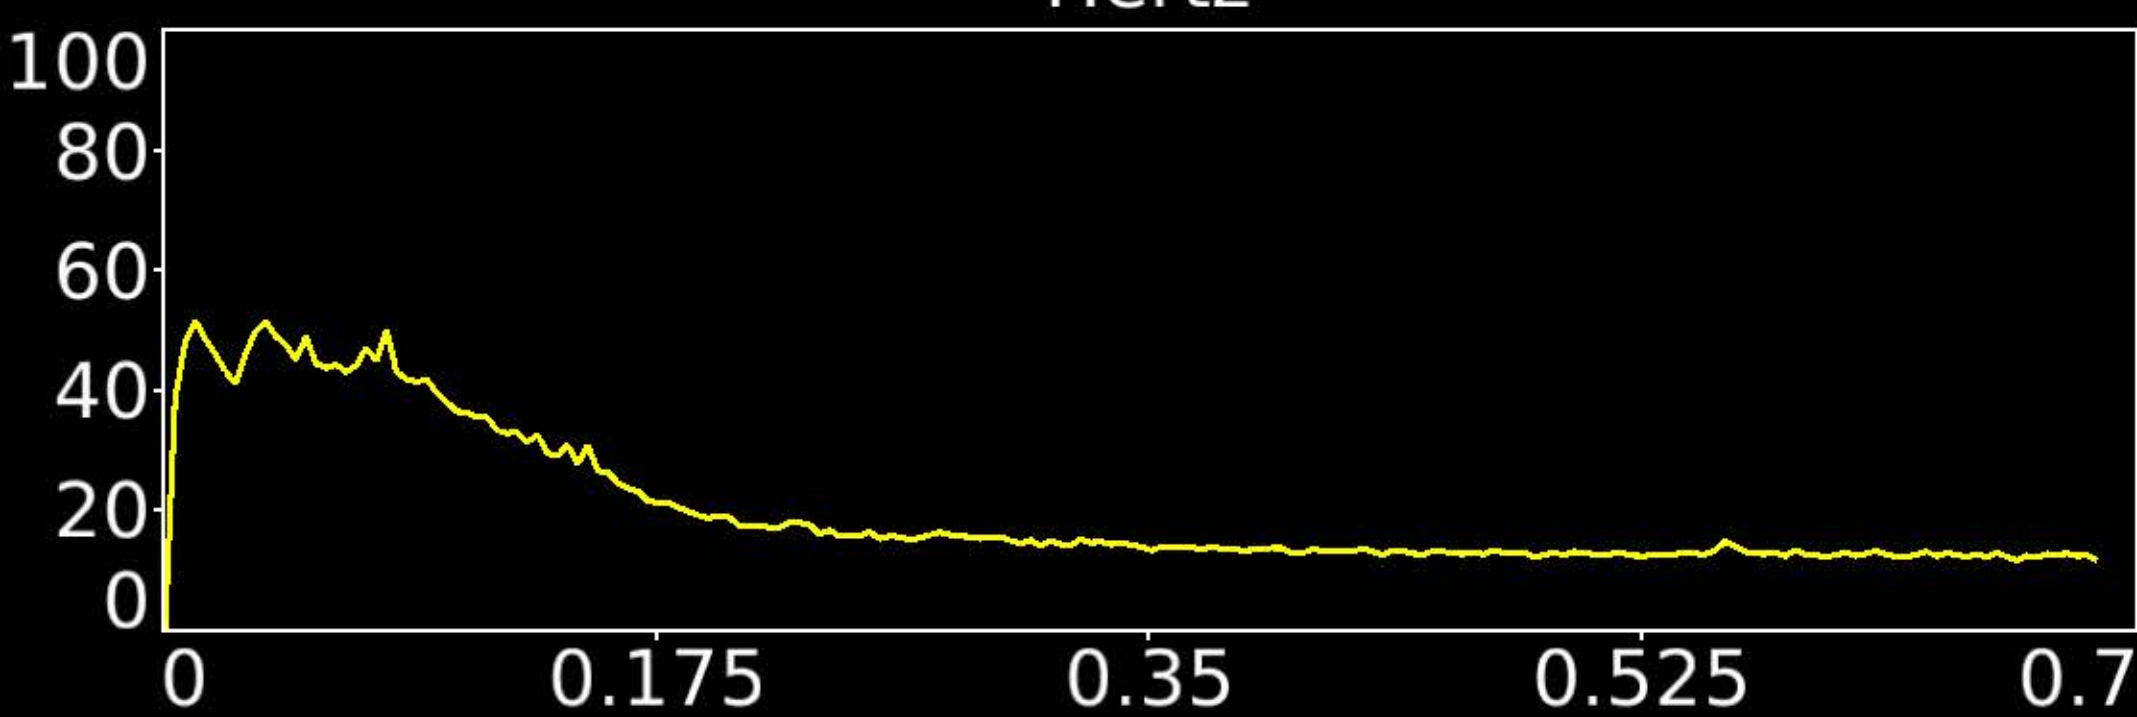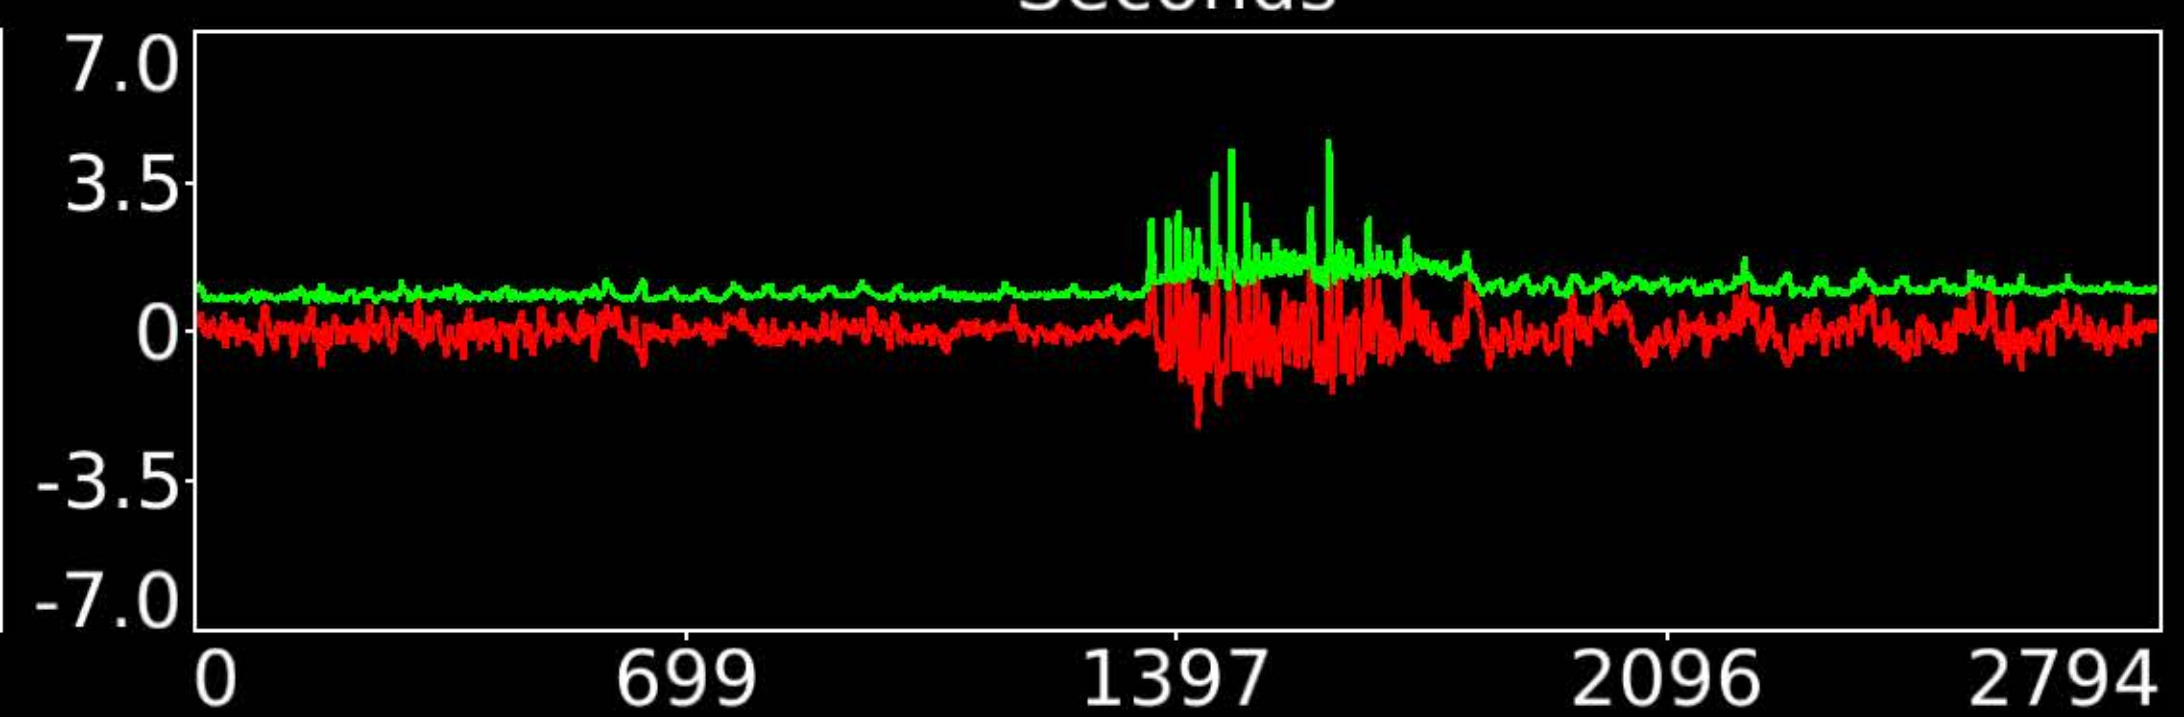

|                                                                                                               |                            |                                     |  |
|---------------------------------------------------------------------------------------------------------------|----------------------------|-------------------------------------|--|
| Number & Class: 17 Signal                                                                                     |                            | Name: Residual Task (Language Math) |  |
| RVT Correlated: No                                                                                            | DVARS Dip Associated: No   | Cross-Subject Variable: No          |  |
| Single Subject: No                                                                                            | % Variance Explained: 2.17 | Globality Index: 0                  |  |
| Task Component: 24                                                                                            | Rest Component: 12         | Task Modulated: Language            |  |
| Rationale: Spatial map includes positive and negative patches that are correlated with a specific task design |                            |                                     |  |



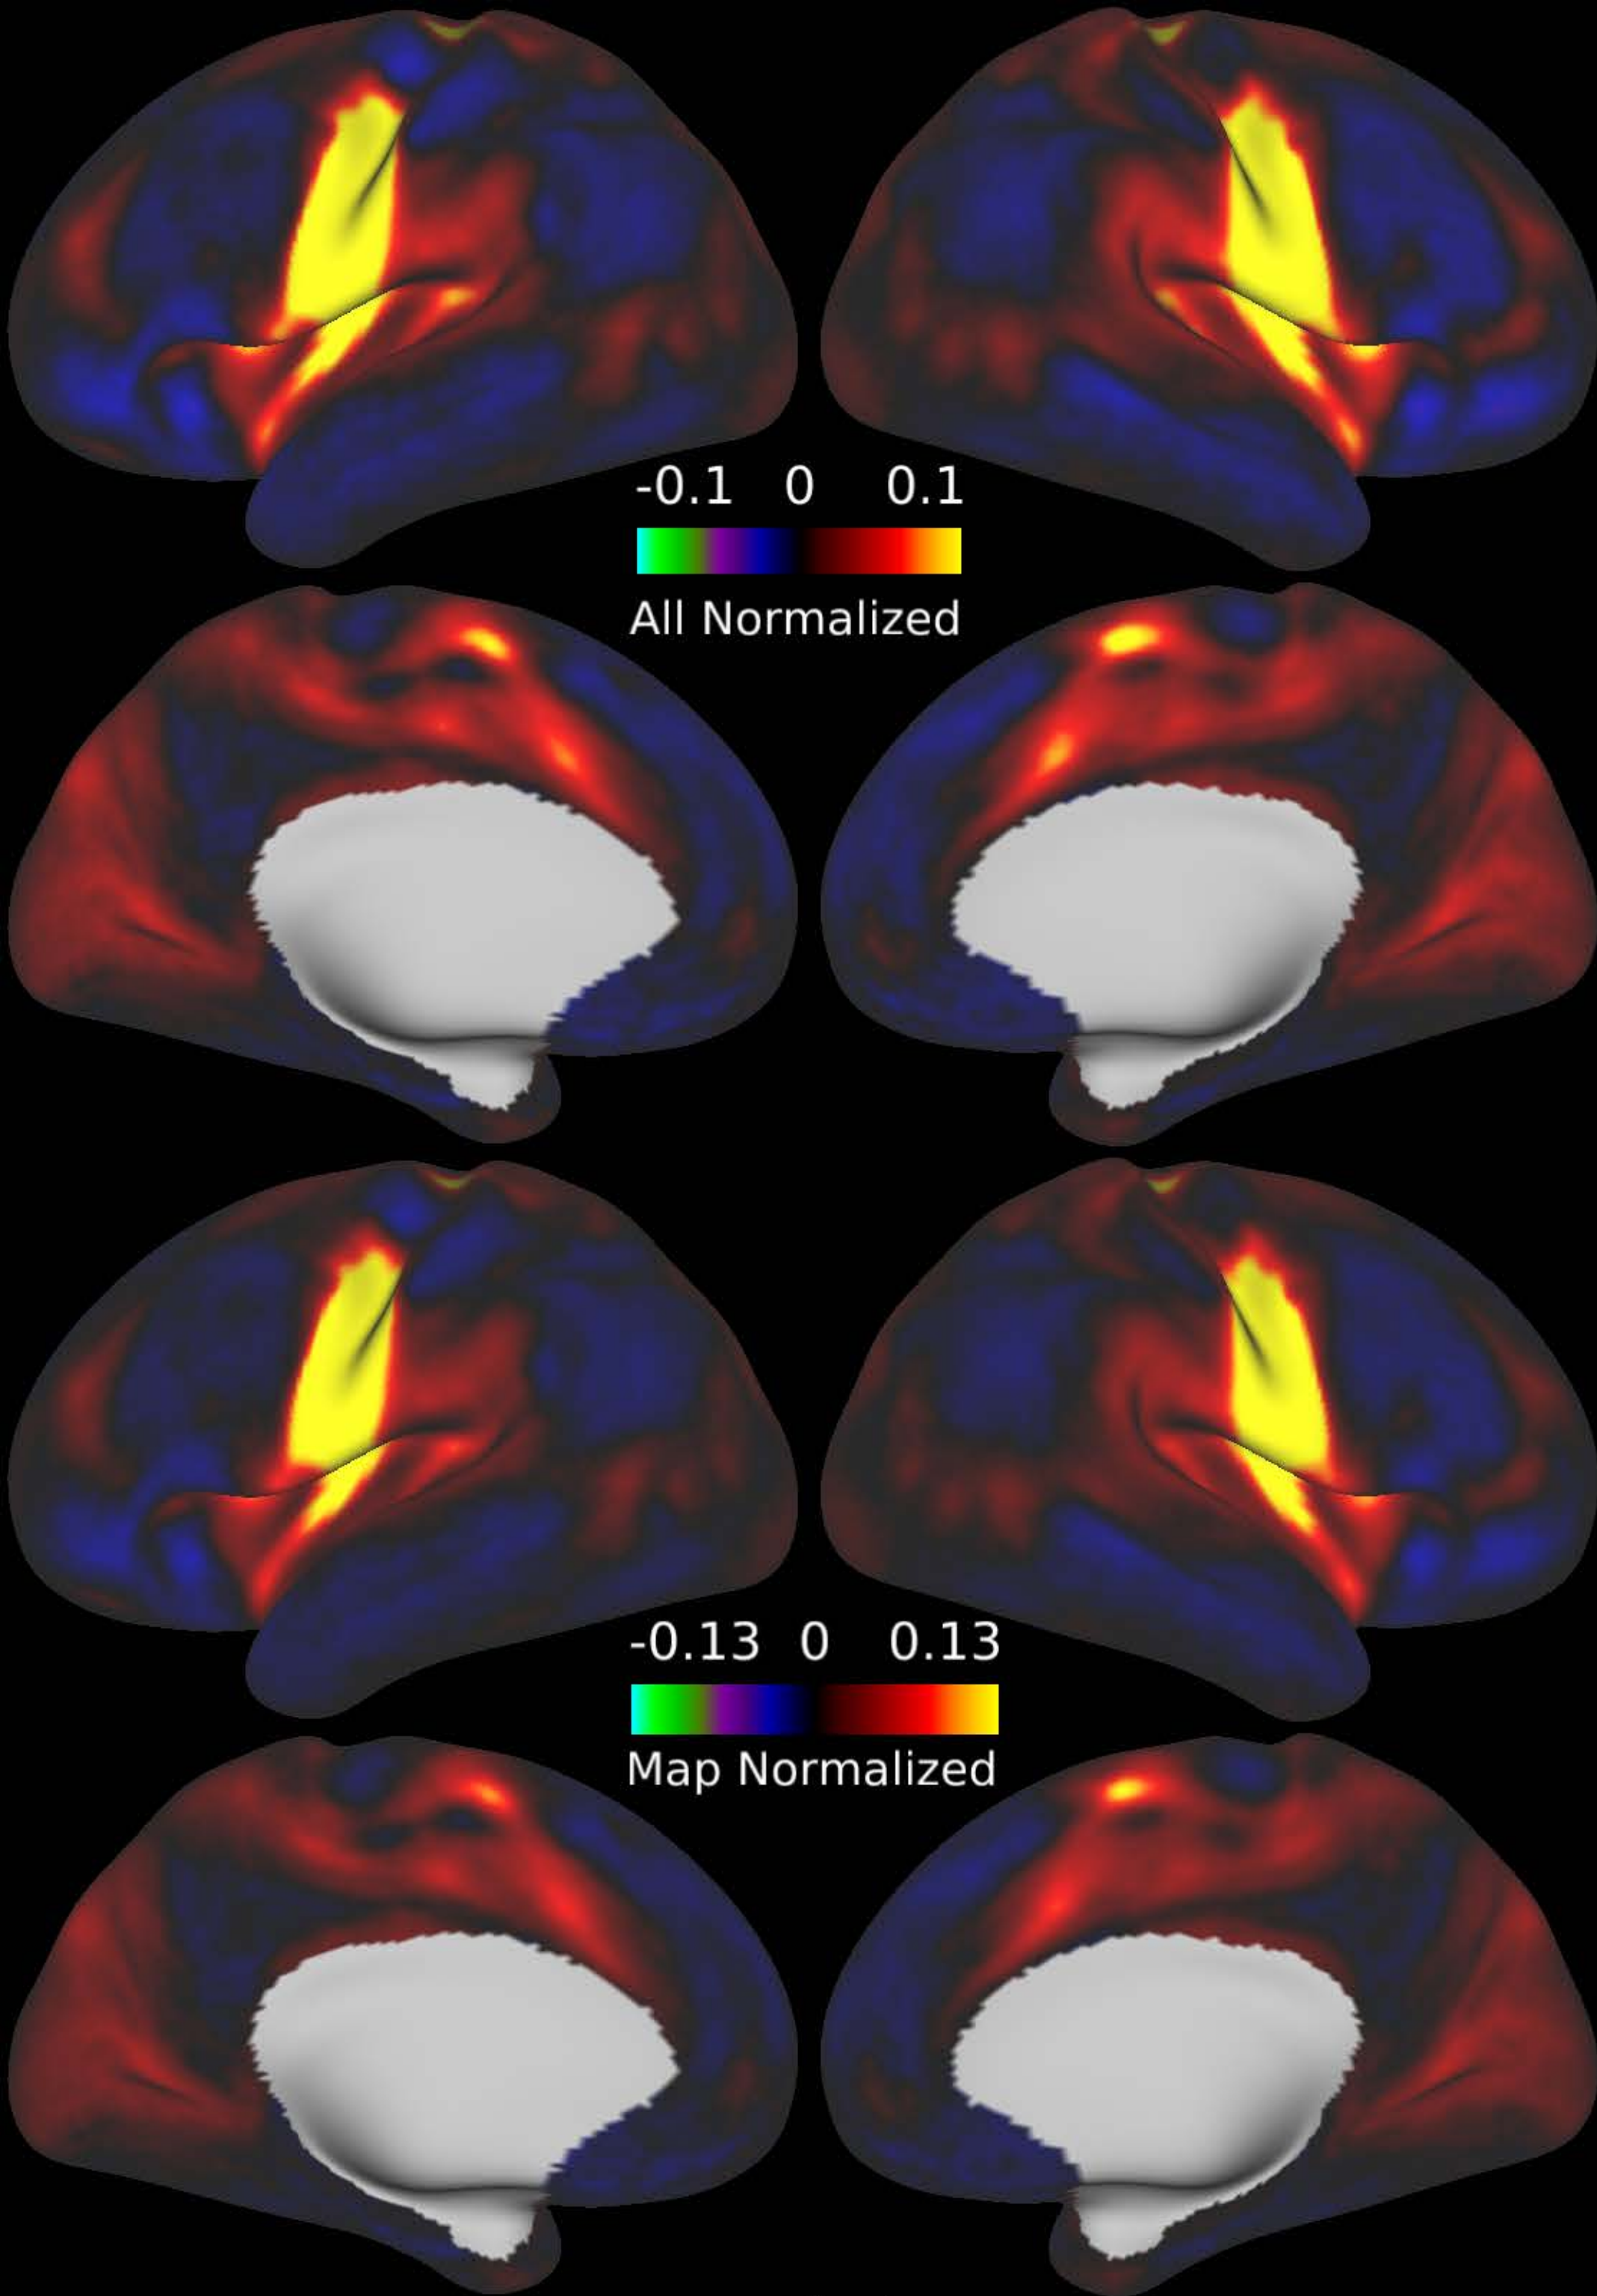

Hertz

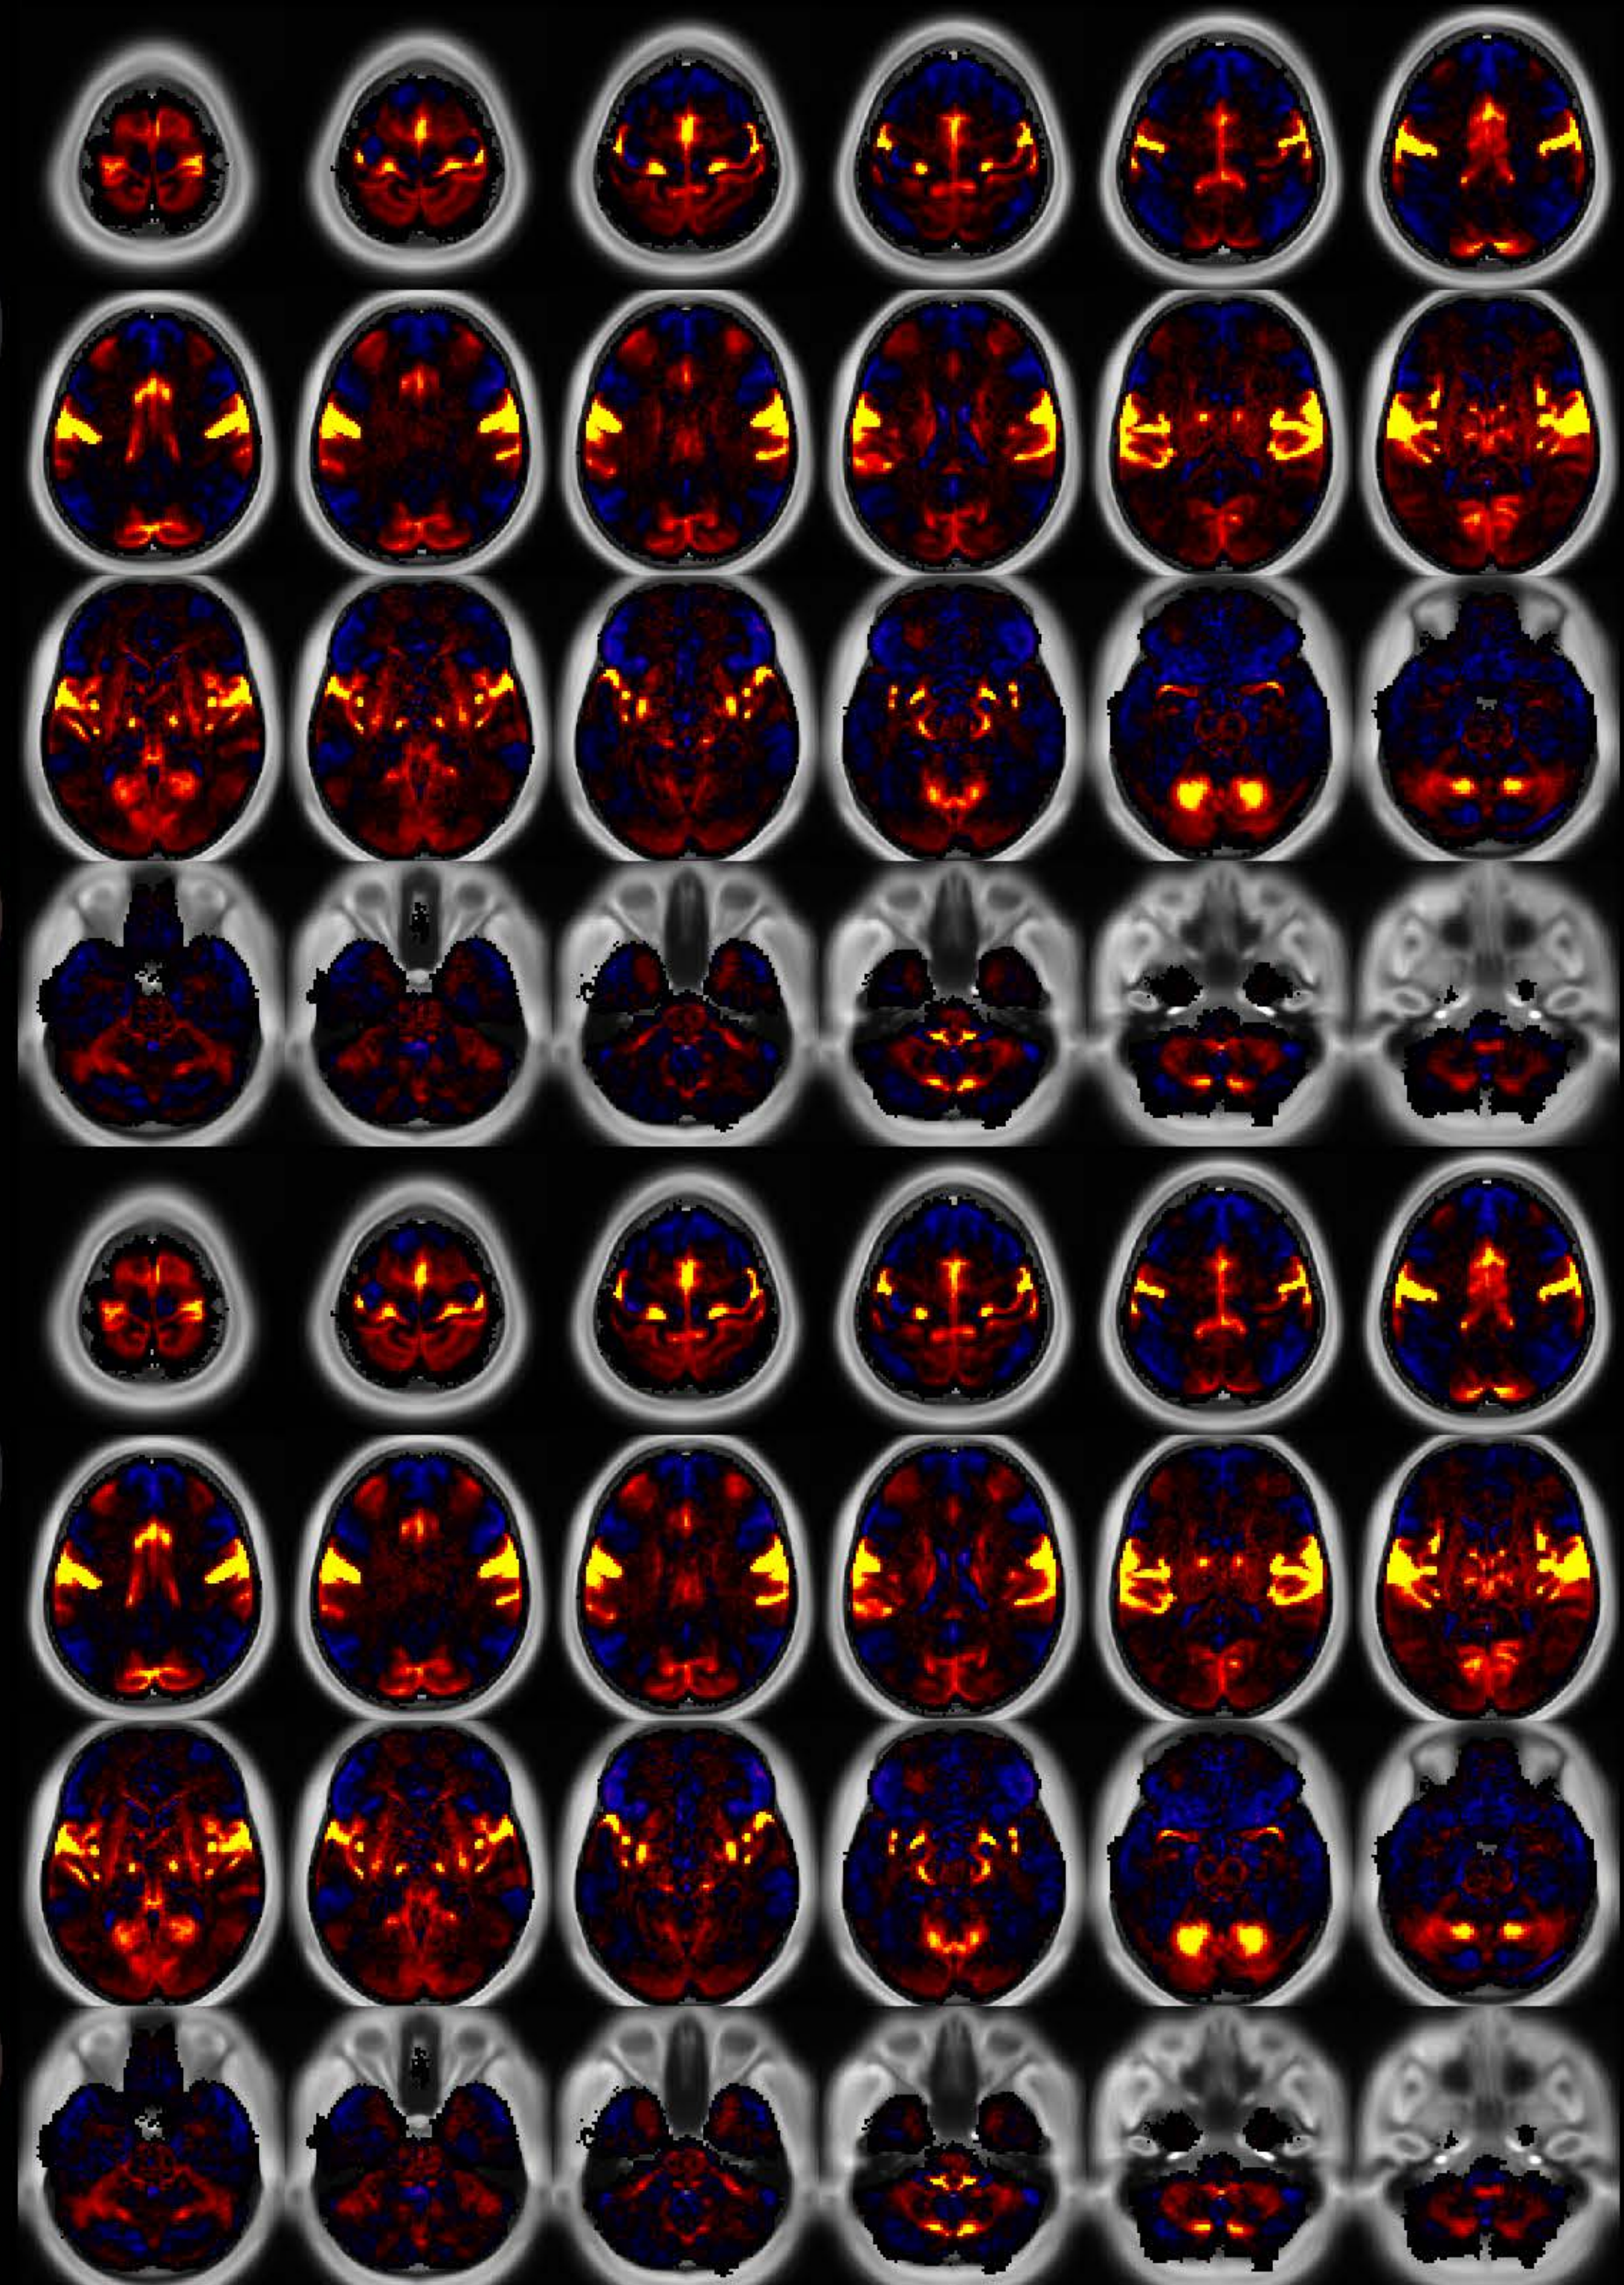

Seconds

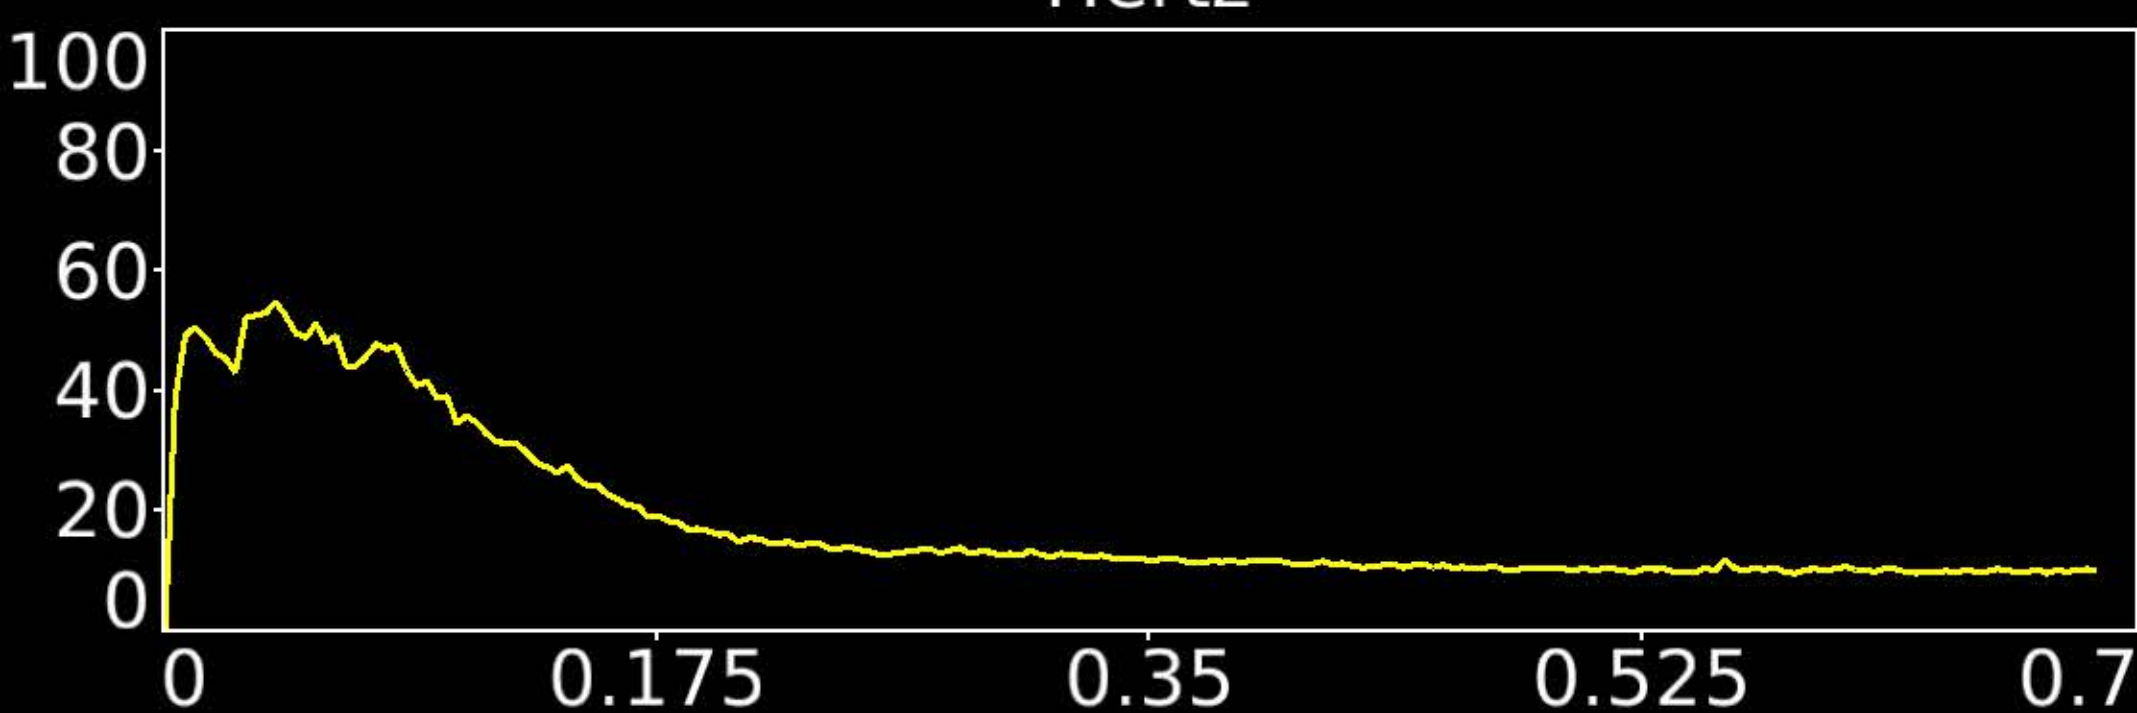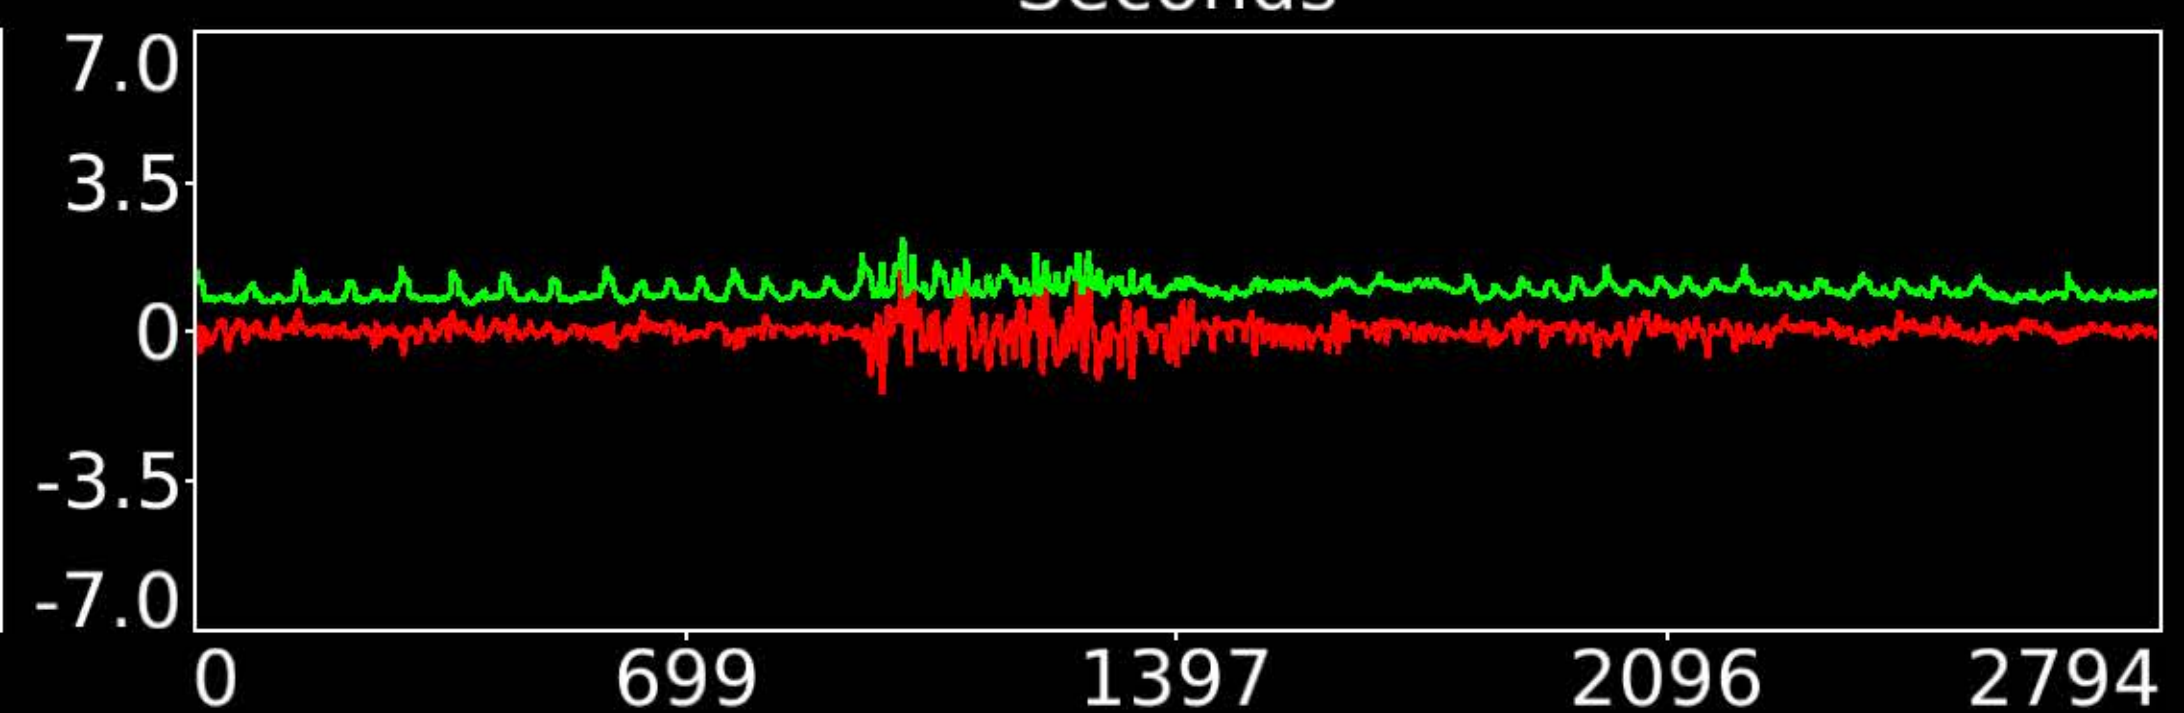

|                           |                            |                             |  |
|---------------------------|----------------------------|-----------------------------|--|
| Number & Class: 18 Signal |                            | Name: Head Motor Network    |  |
| RVT Correlated: No        | DVARS Dip Associated: Yes  | Cross-Subject Variable: Yes |  |
| Single Subject: No        | % Variance Explained: 2.13 | Globality Index: 0.81       |  |
| Task Component: 16        | Rest Component: 27         | Task Modulated: No          |  |

Rationale: Spatial map includes positive and negative patches that respect known somatotopic sensori-motor organization (Face)



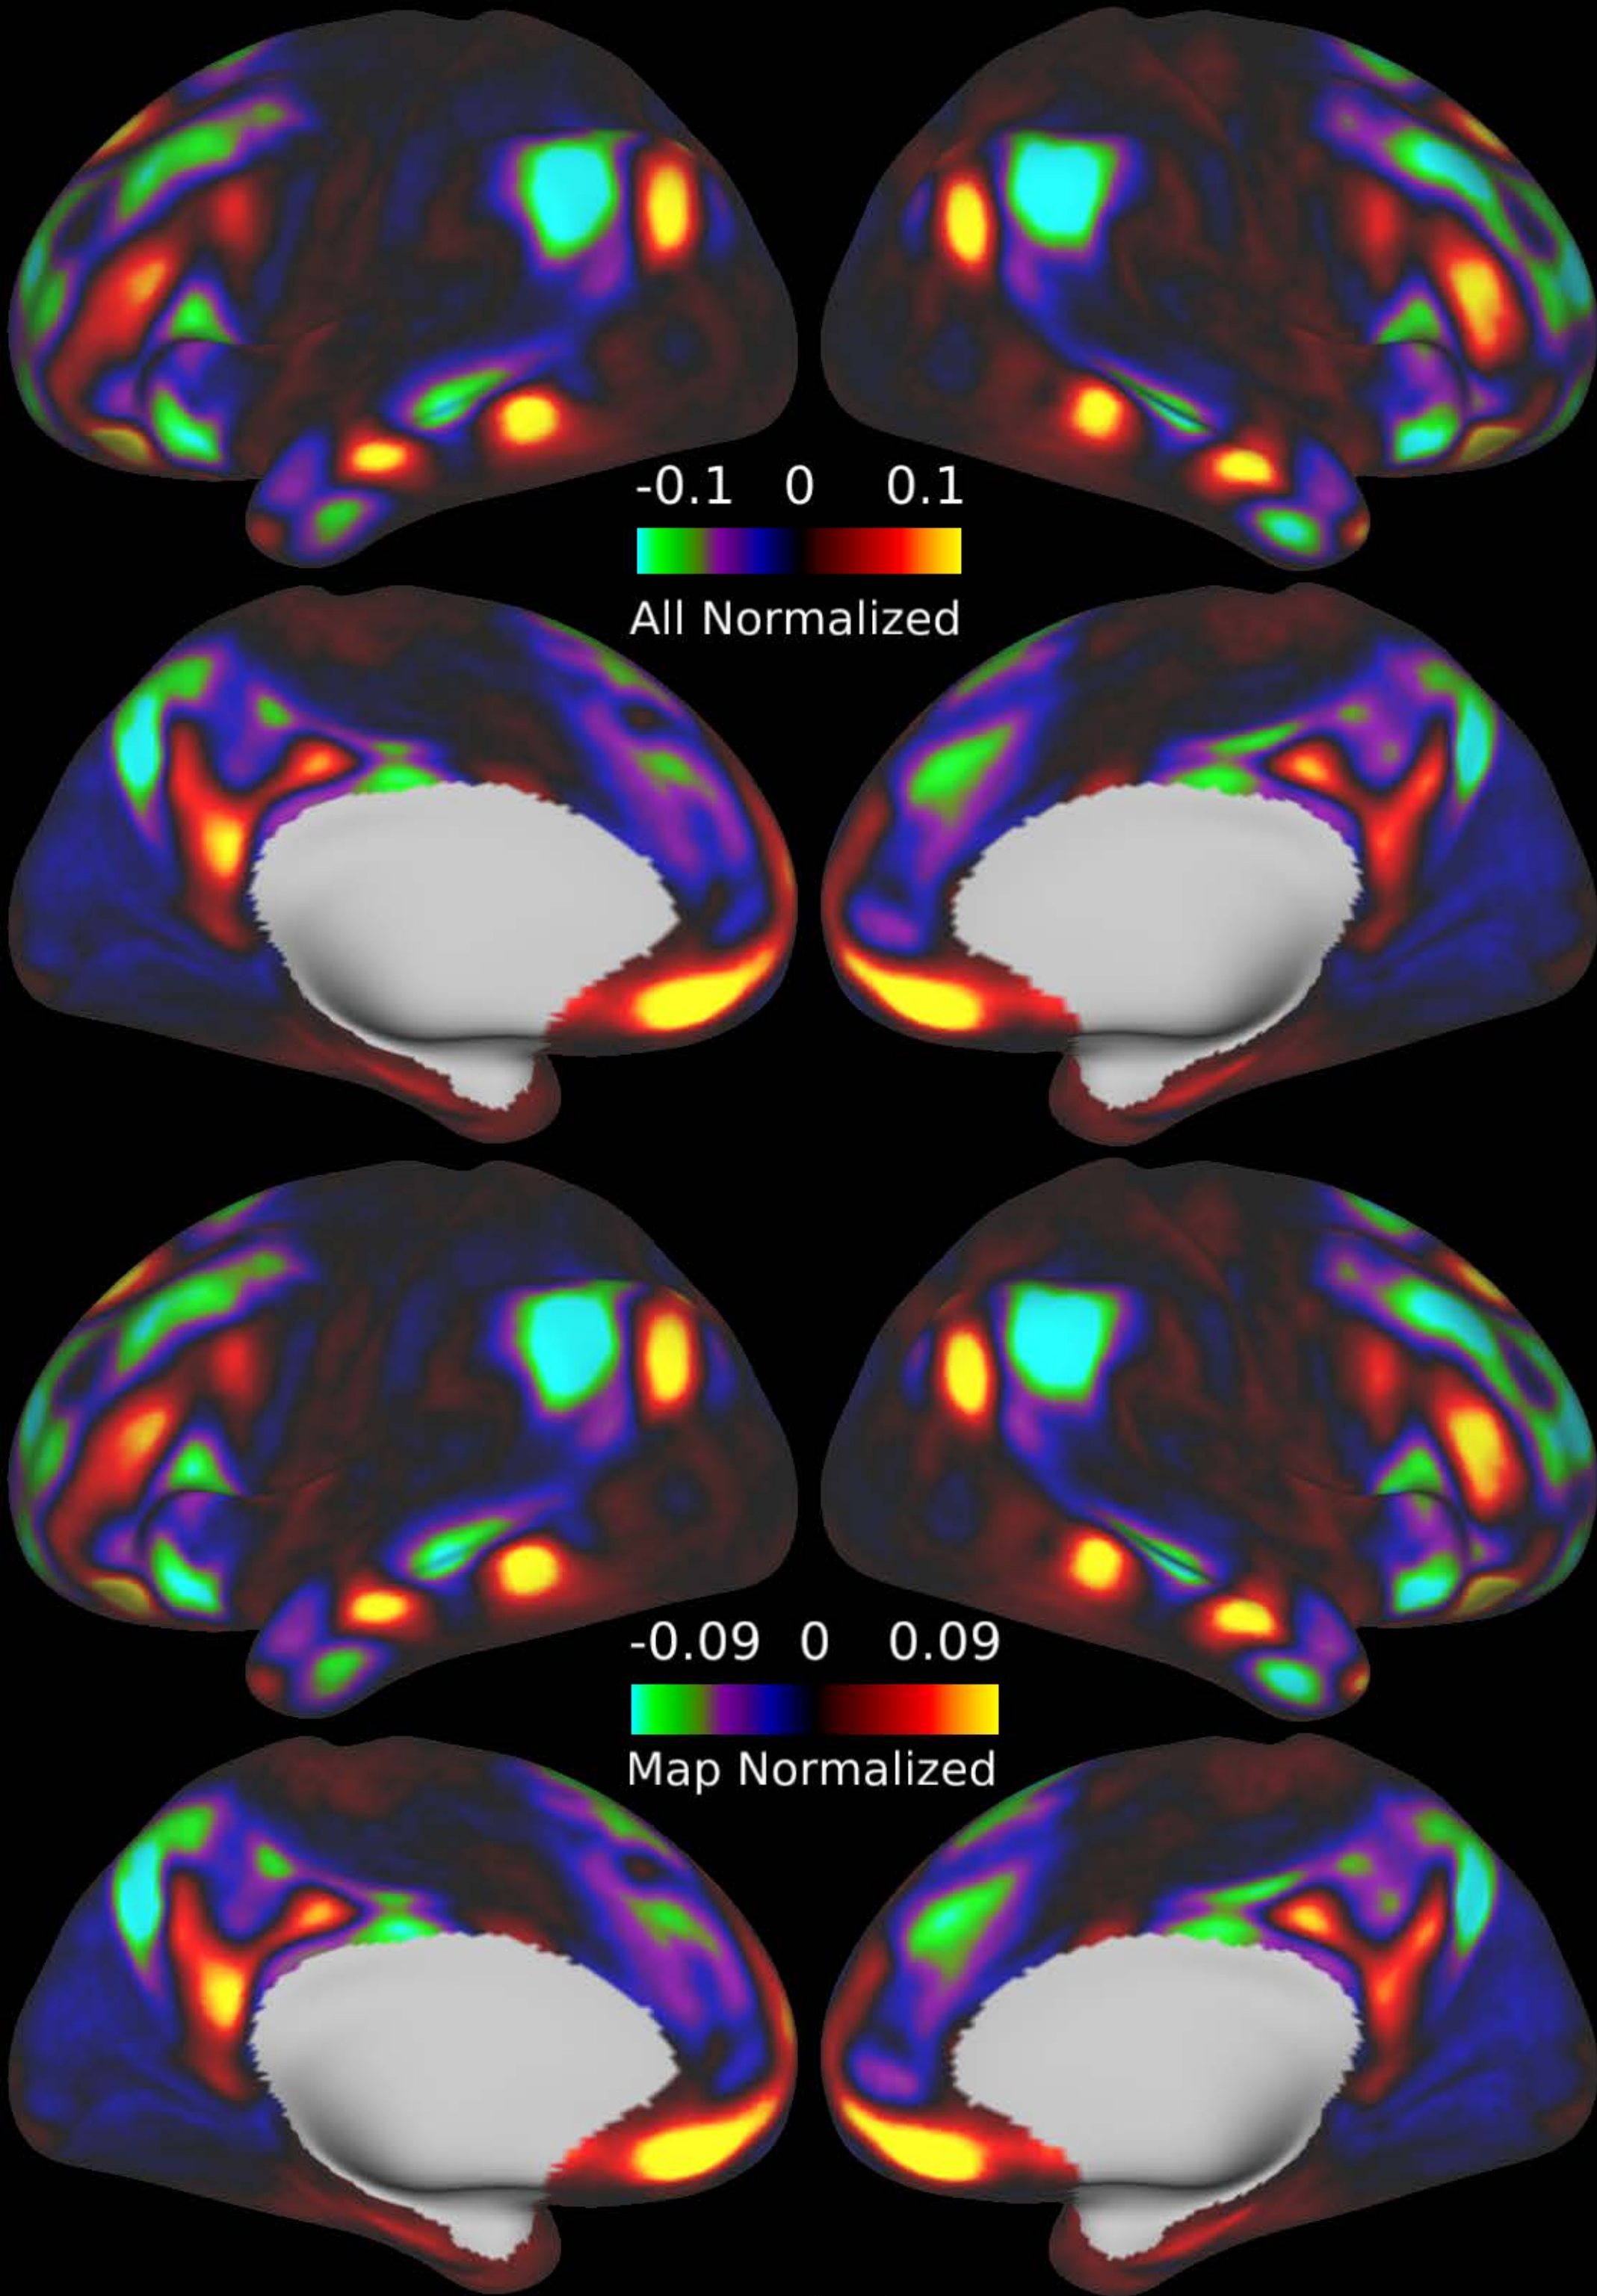

Hertz

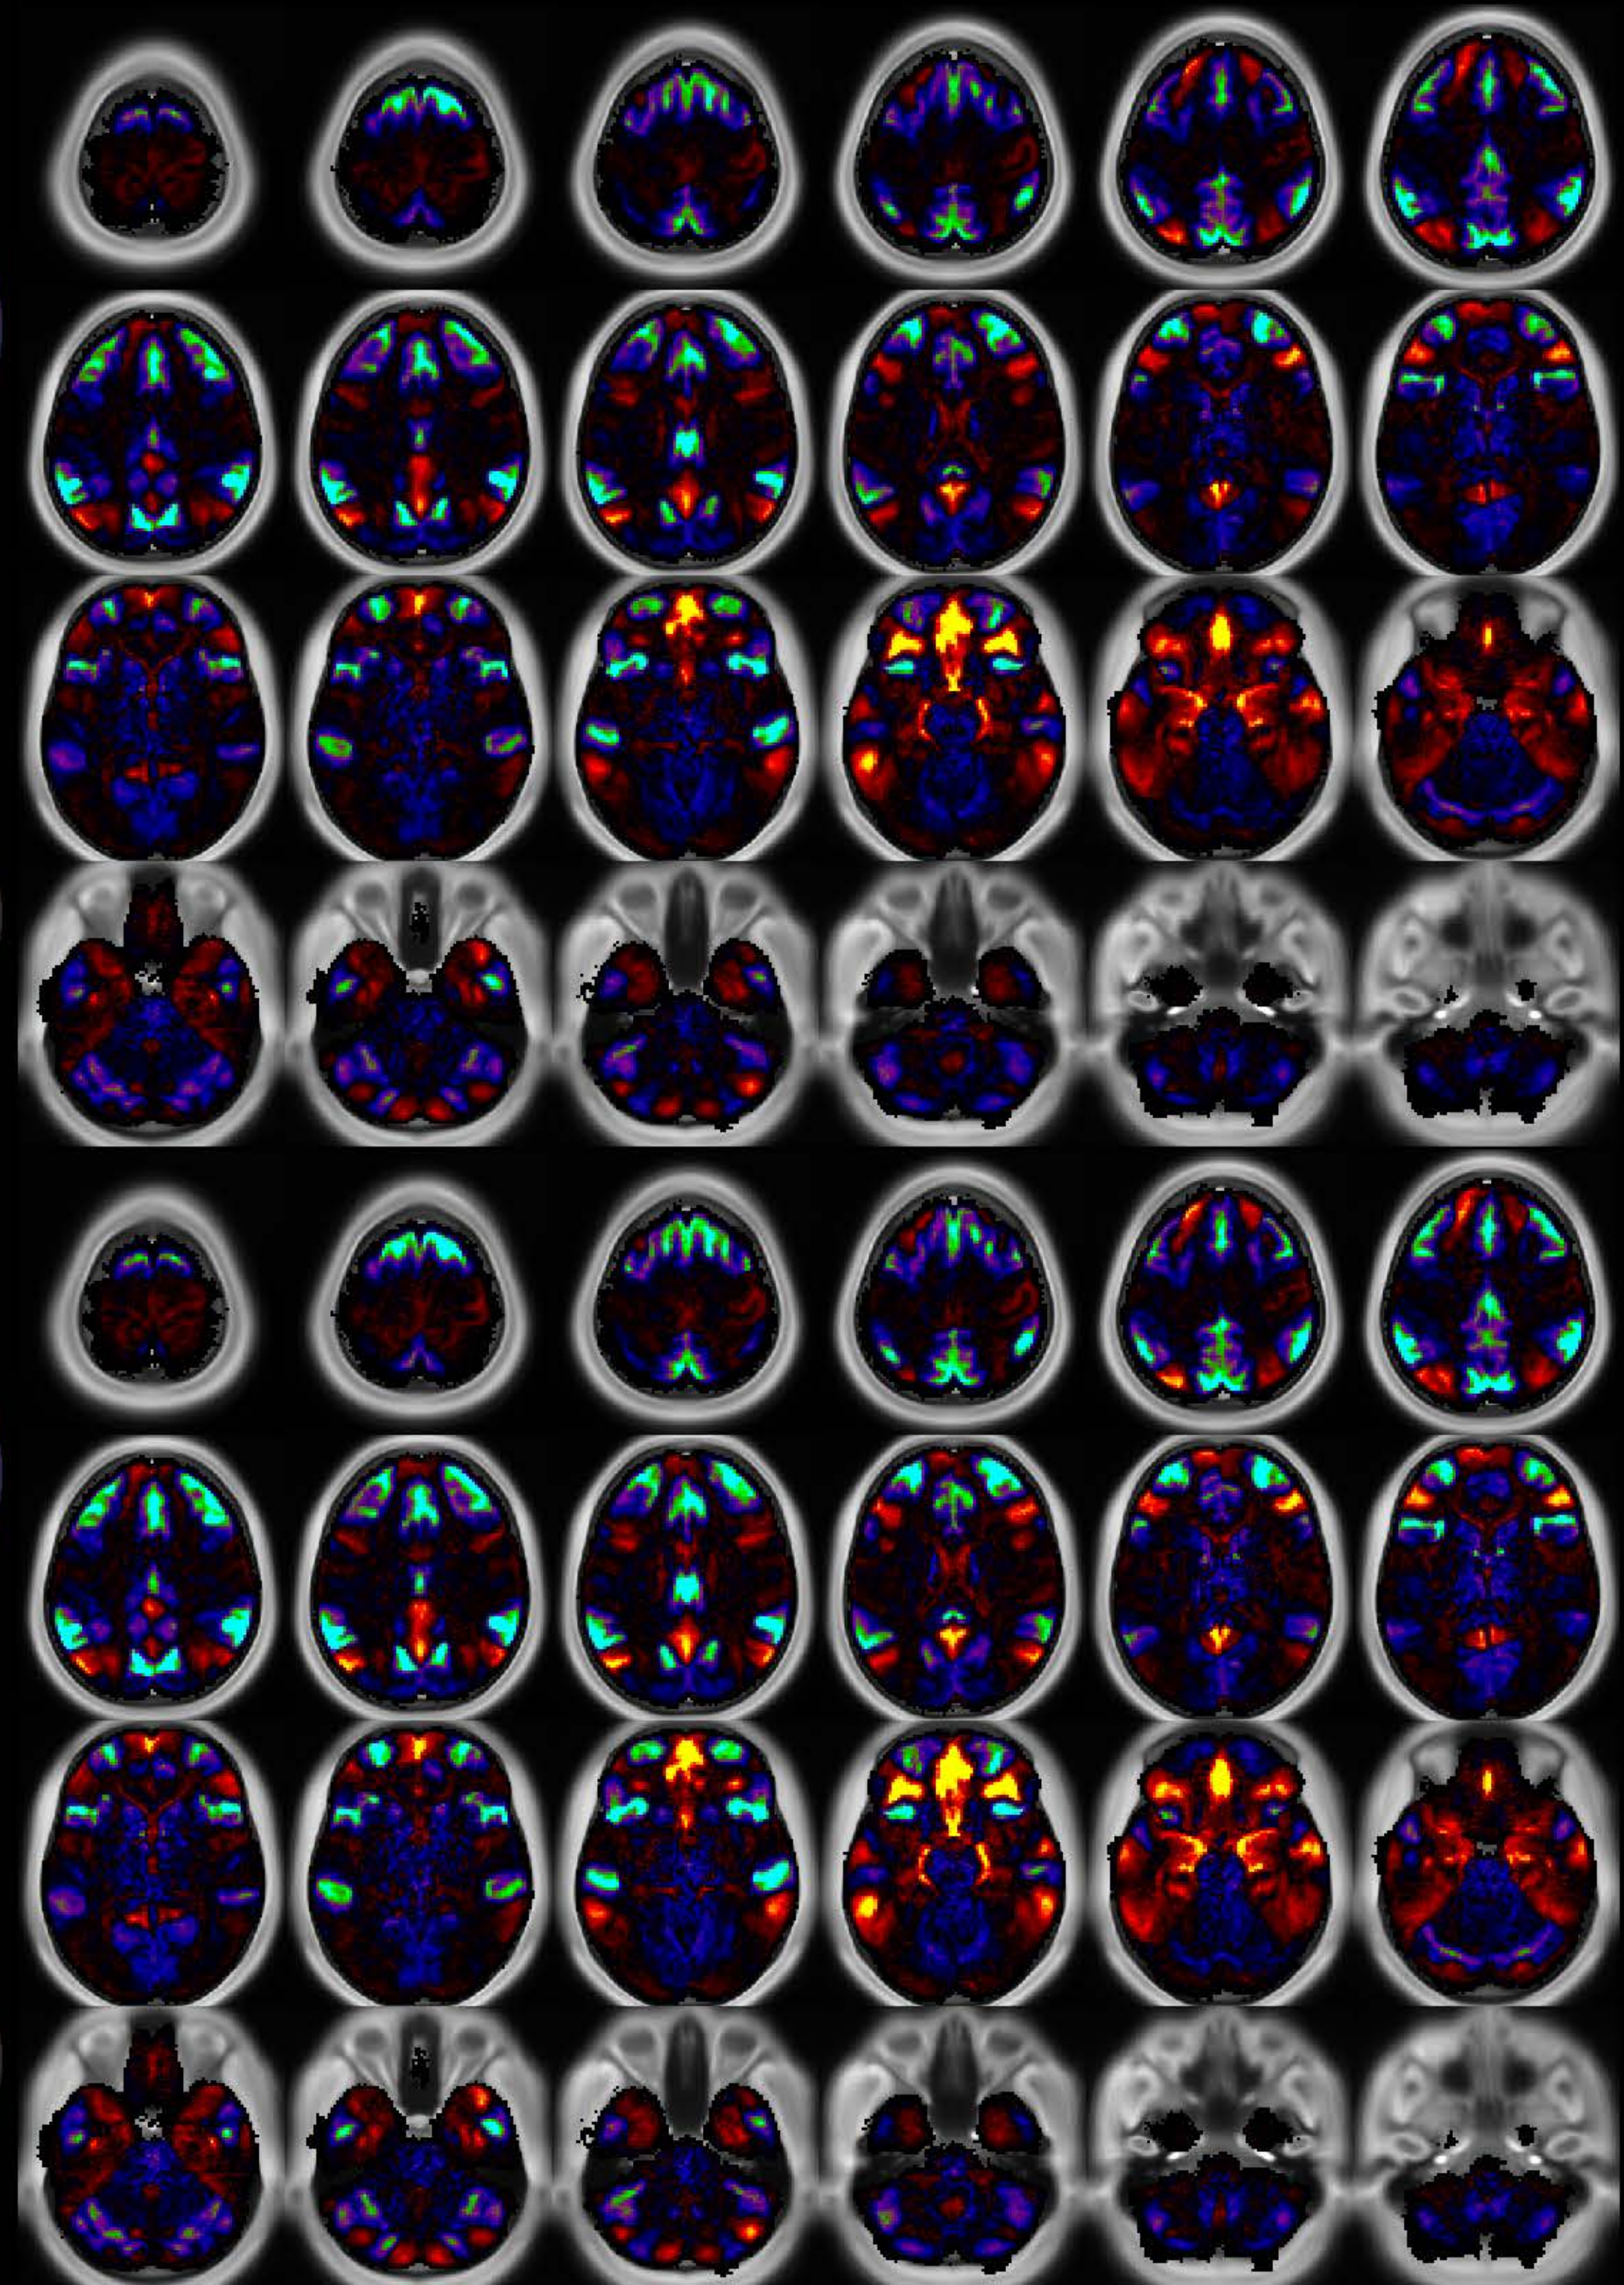

Seconds

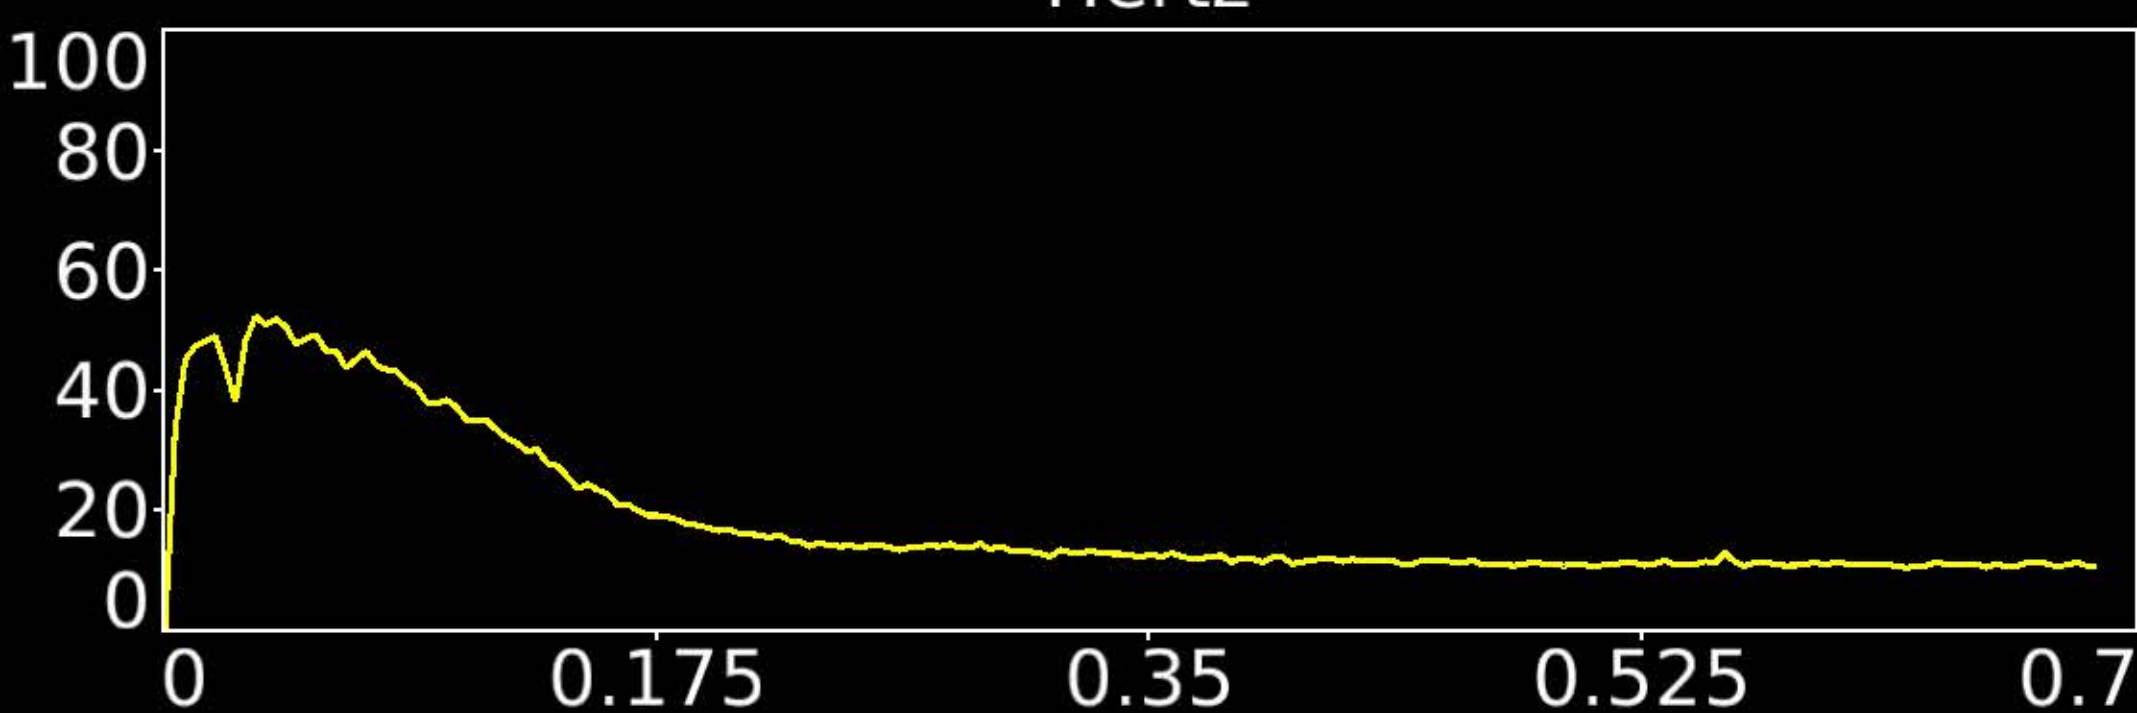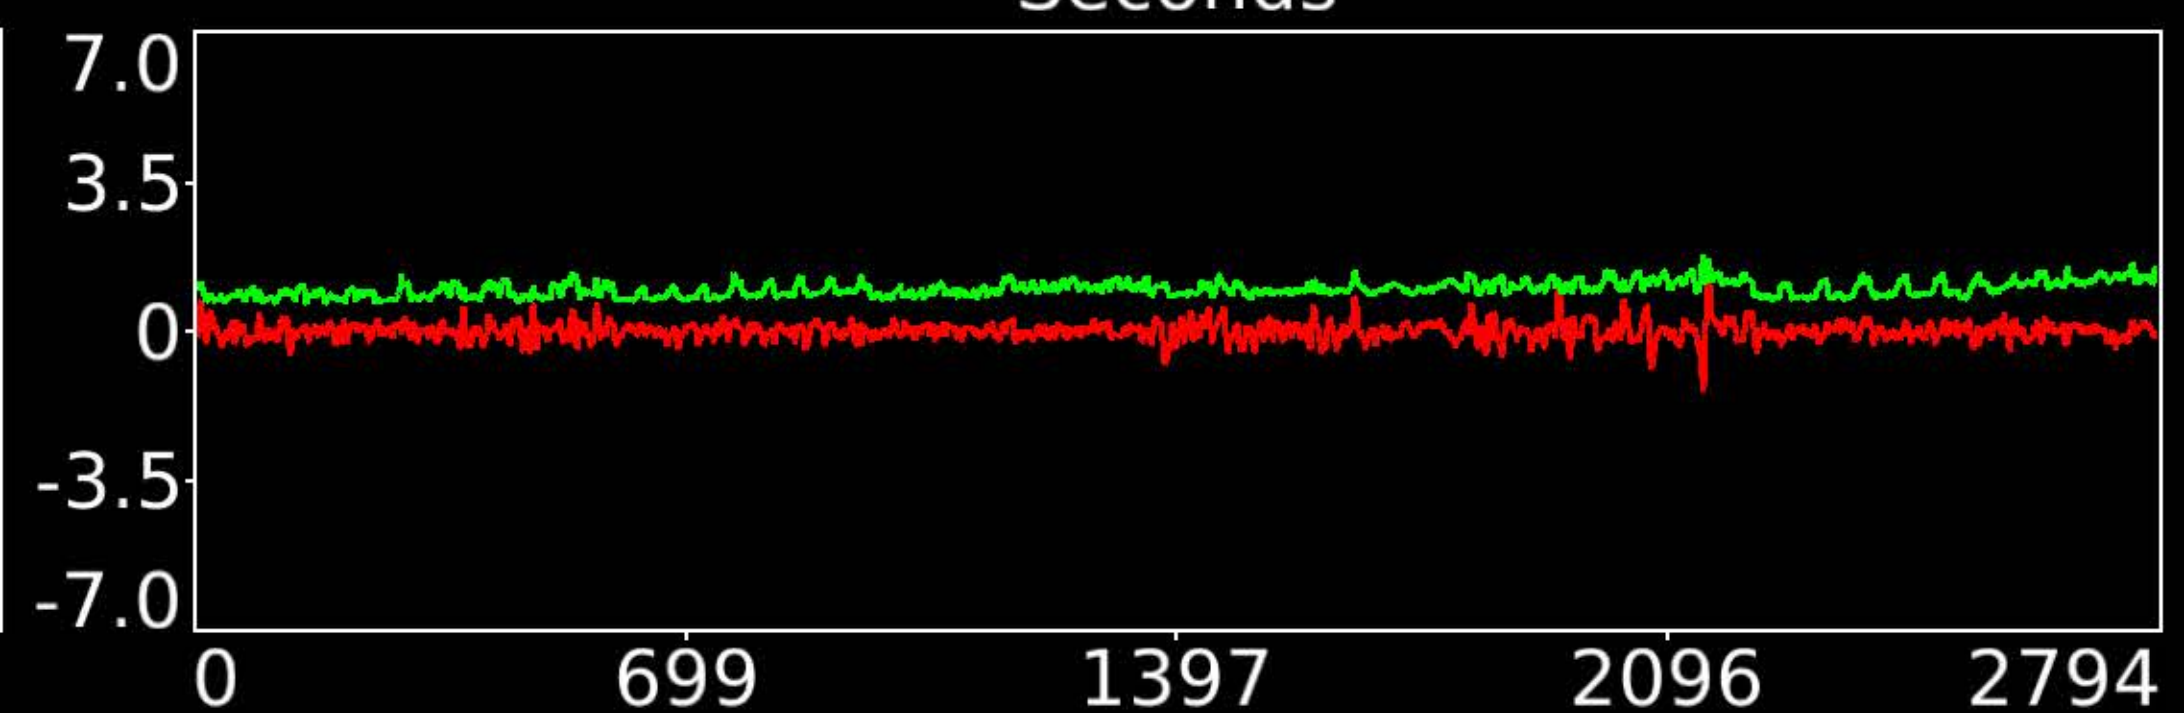

|                                                                                                                   |                            |                               |  |
|-------------------------------------------------------------------------------------------------------------------|----------------------------|-------------------------------|--|
| Number & Class: 19 Signal                                                                                         |                            | Name: Subsidiary Default Mode |  |
| RVT Correlated: No                                                                                                | DVARS Dip Associated: No   | Cross-Subject Variable: No    |  |
| Single Subject: No                                                                                                | % Variance Explained: 1.93 | Globality Index: 0.52         |  |
| Task Component: No                                                                                                | Rest Component: 15         | Task Modulated: No            |  |
| Rationale: Spatial map includes positive and negative patches that respect known RSNs (e.g. Default Mode Network) |                            |                               |  |



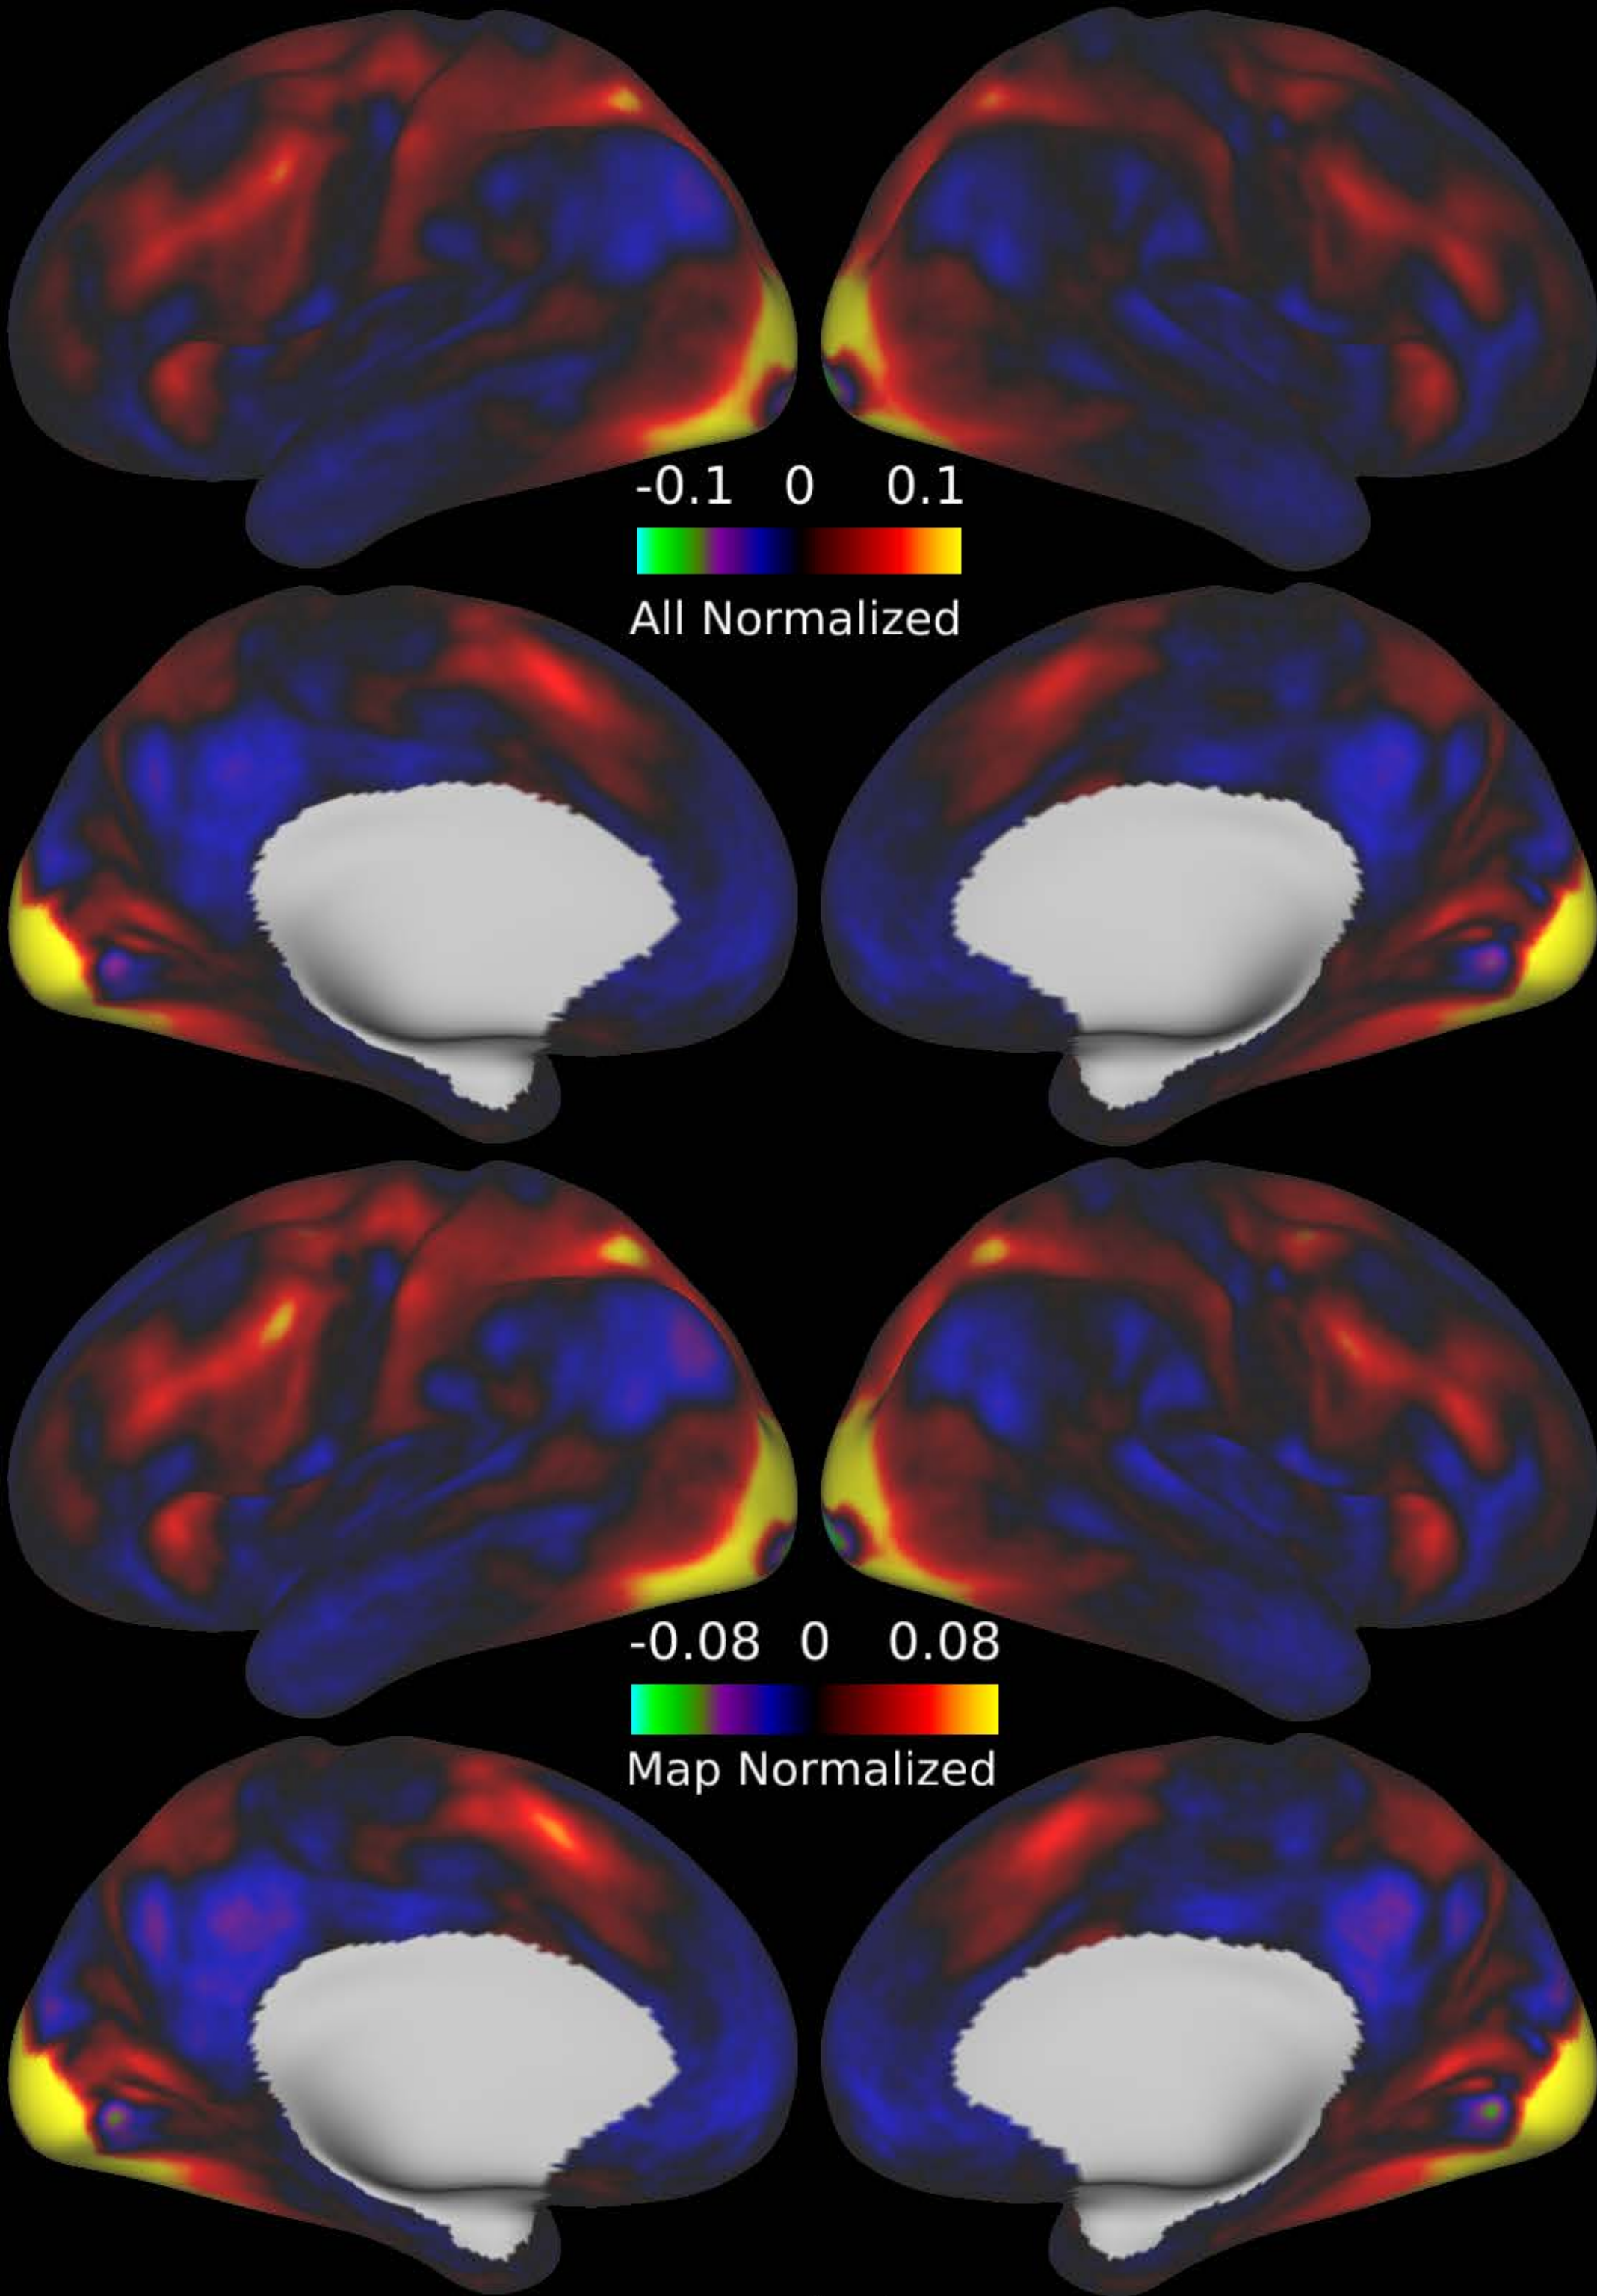

Hertz

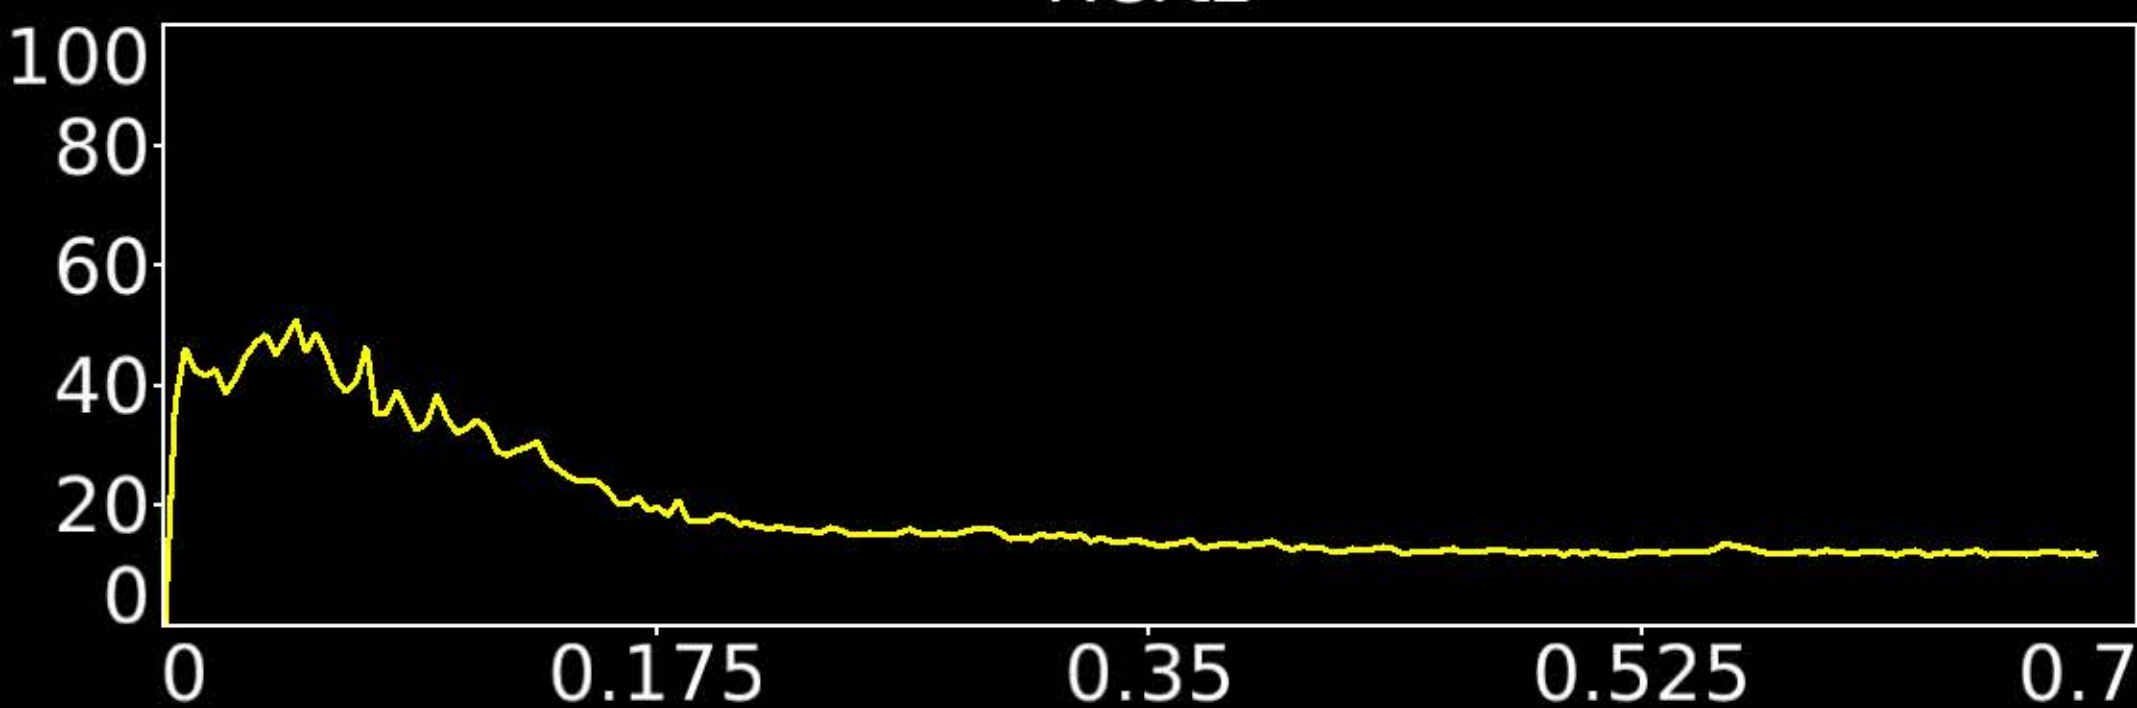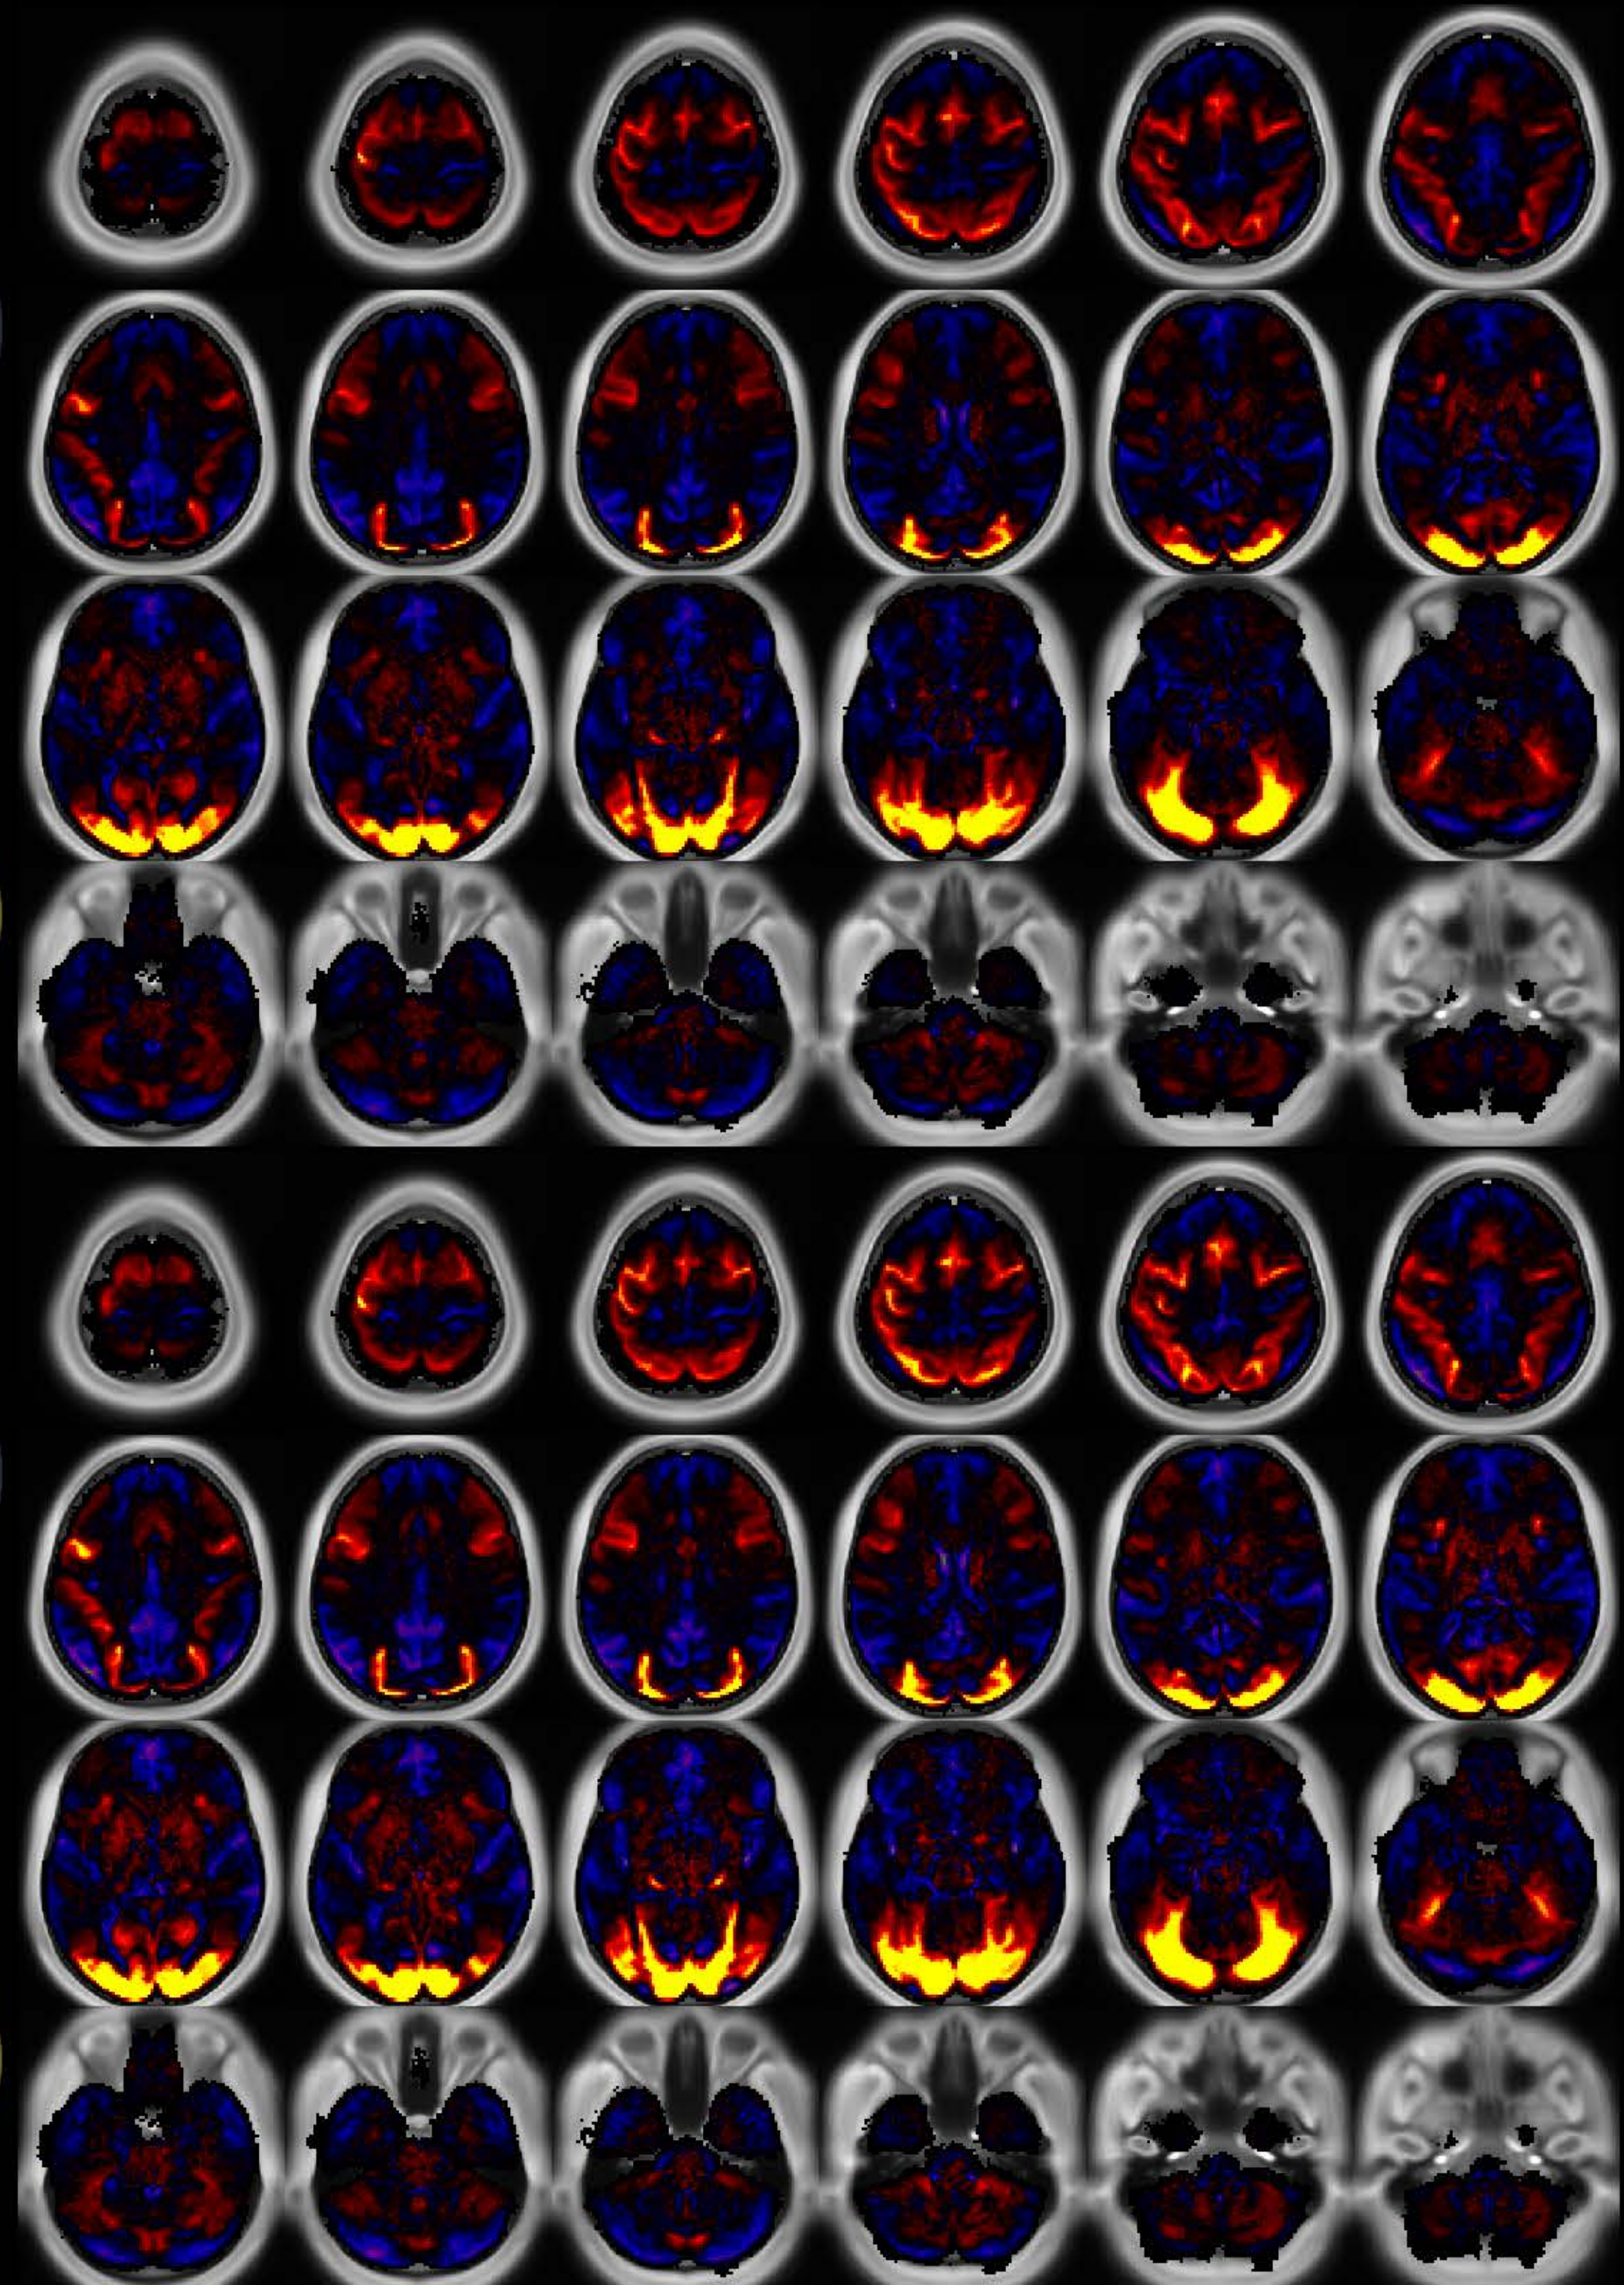

Seconds

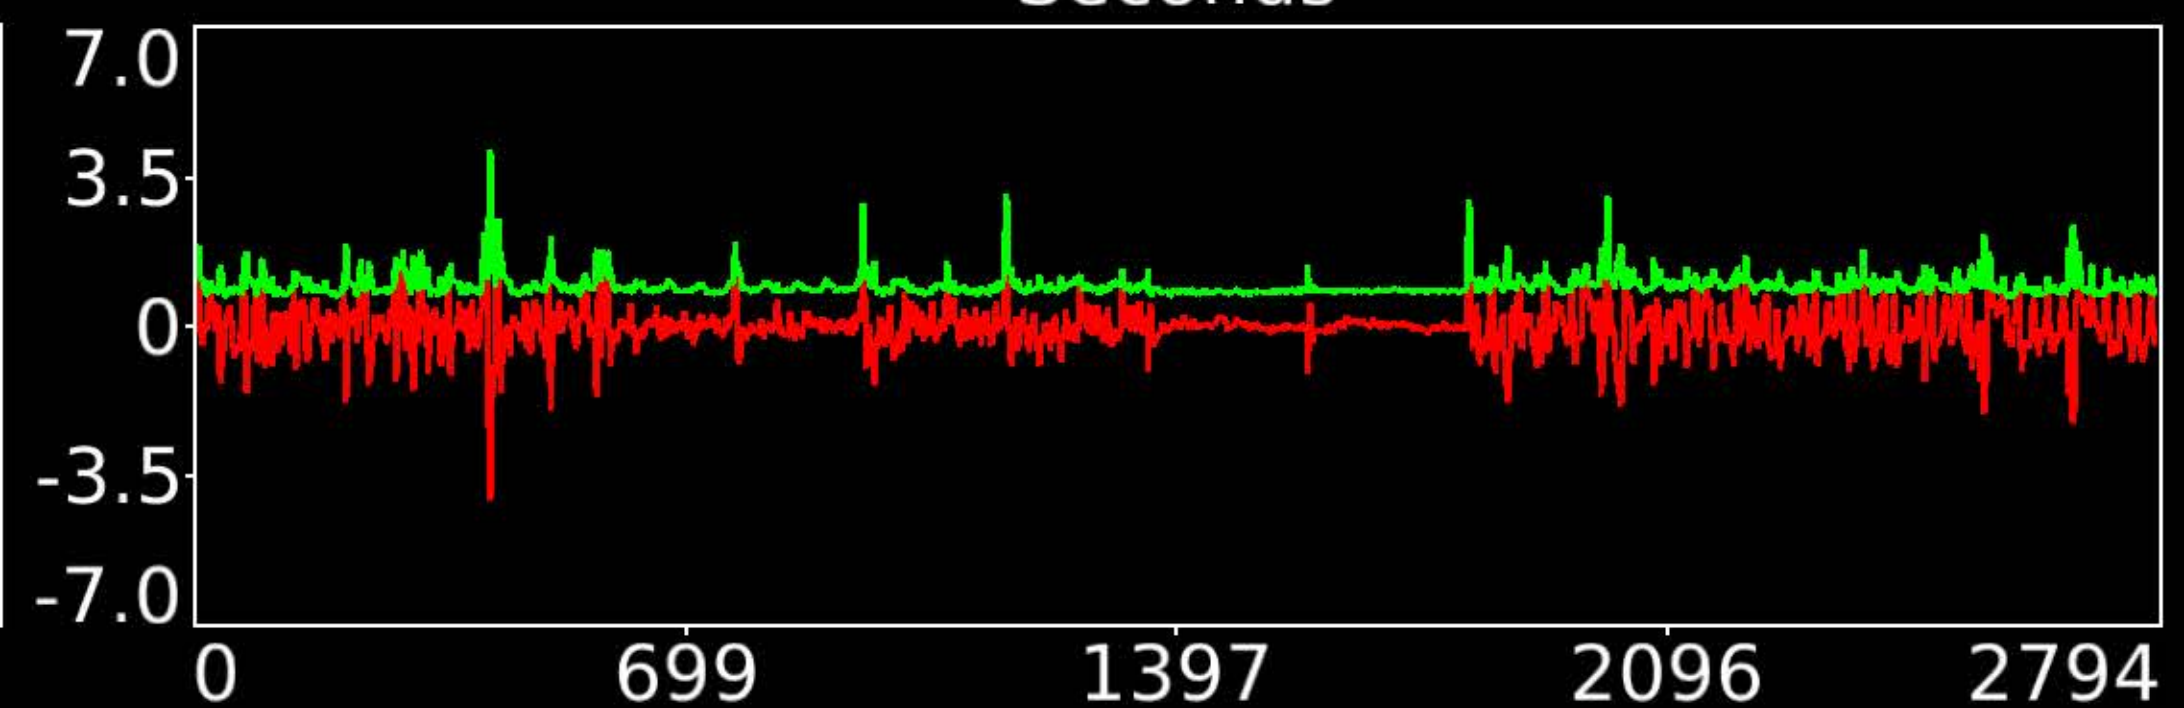

|                           |                            |                                                 |  |
|---------------------------|----------------------------|-------------------------------------------------|--|
| Number & Class: 20 Signal |                            | Name: Pan-Visual (Parafoveal) Plus R Hand Motor |  |
| RVT Correlated: No        | DVARS Dip Associated: Yes  | Cross-Subject Variable: No                      |  |
| Single Subject: No        | % Variance Explained: 1.84 | Globality Index: 0.32                           |  |
| Task Component: 7+18      | Rest Component: No         | Task Modulated: No                              |  |

Rationale: Spatial map includes positive and negative patches that respect known retinotopic visual organization (Paracentral vs Foveal and Peripheral)



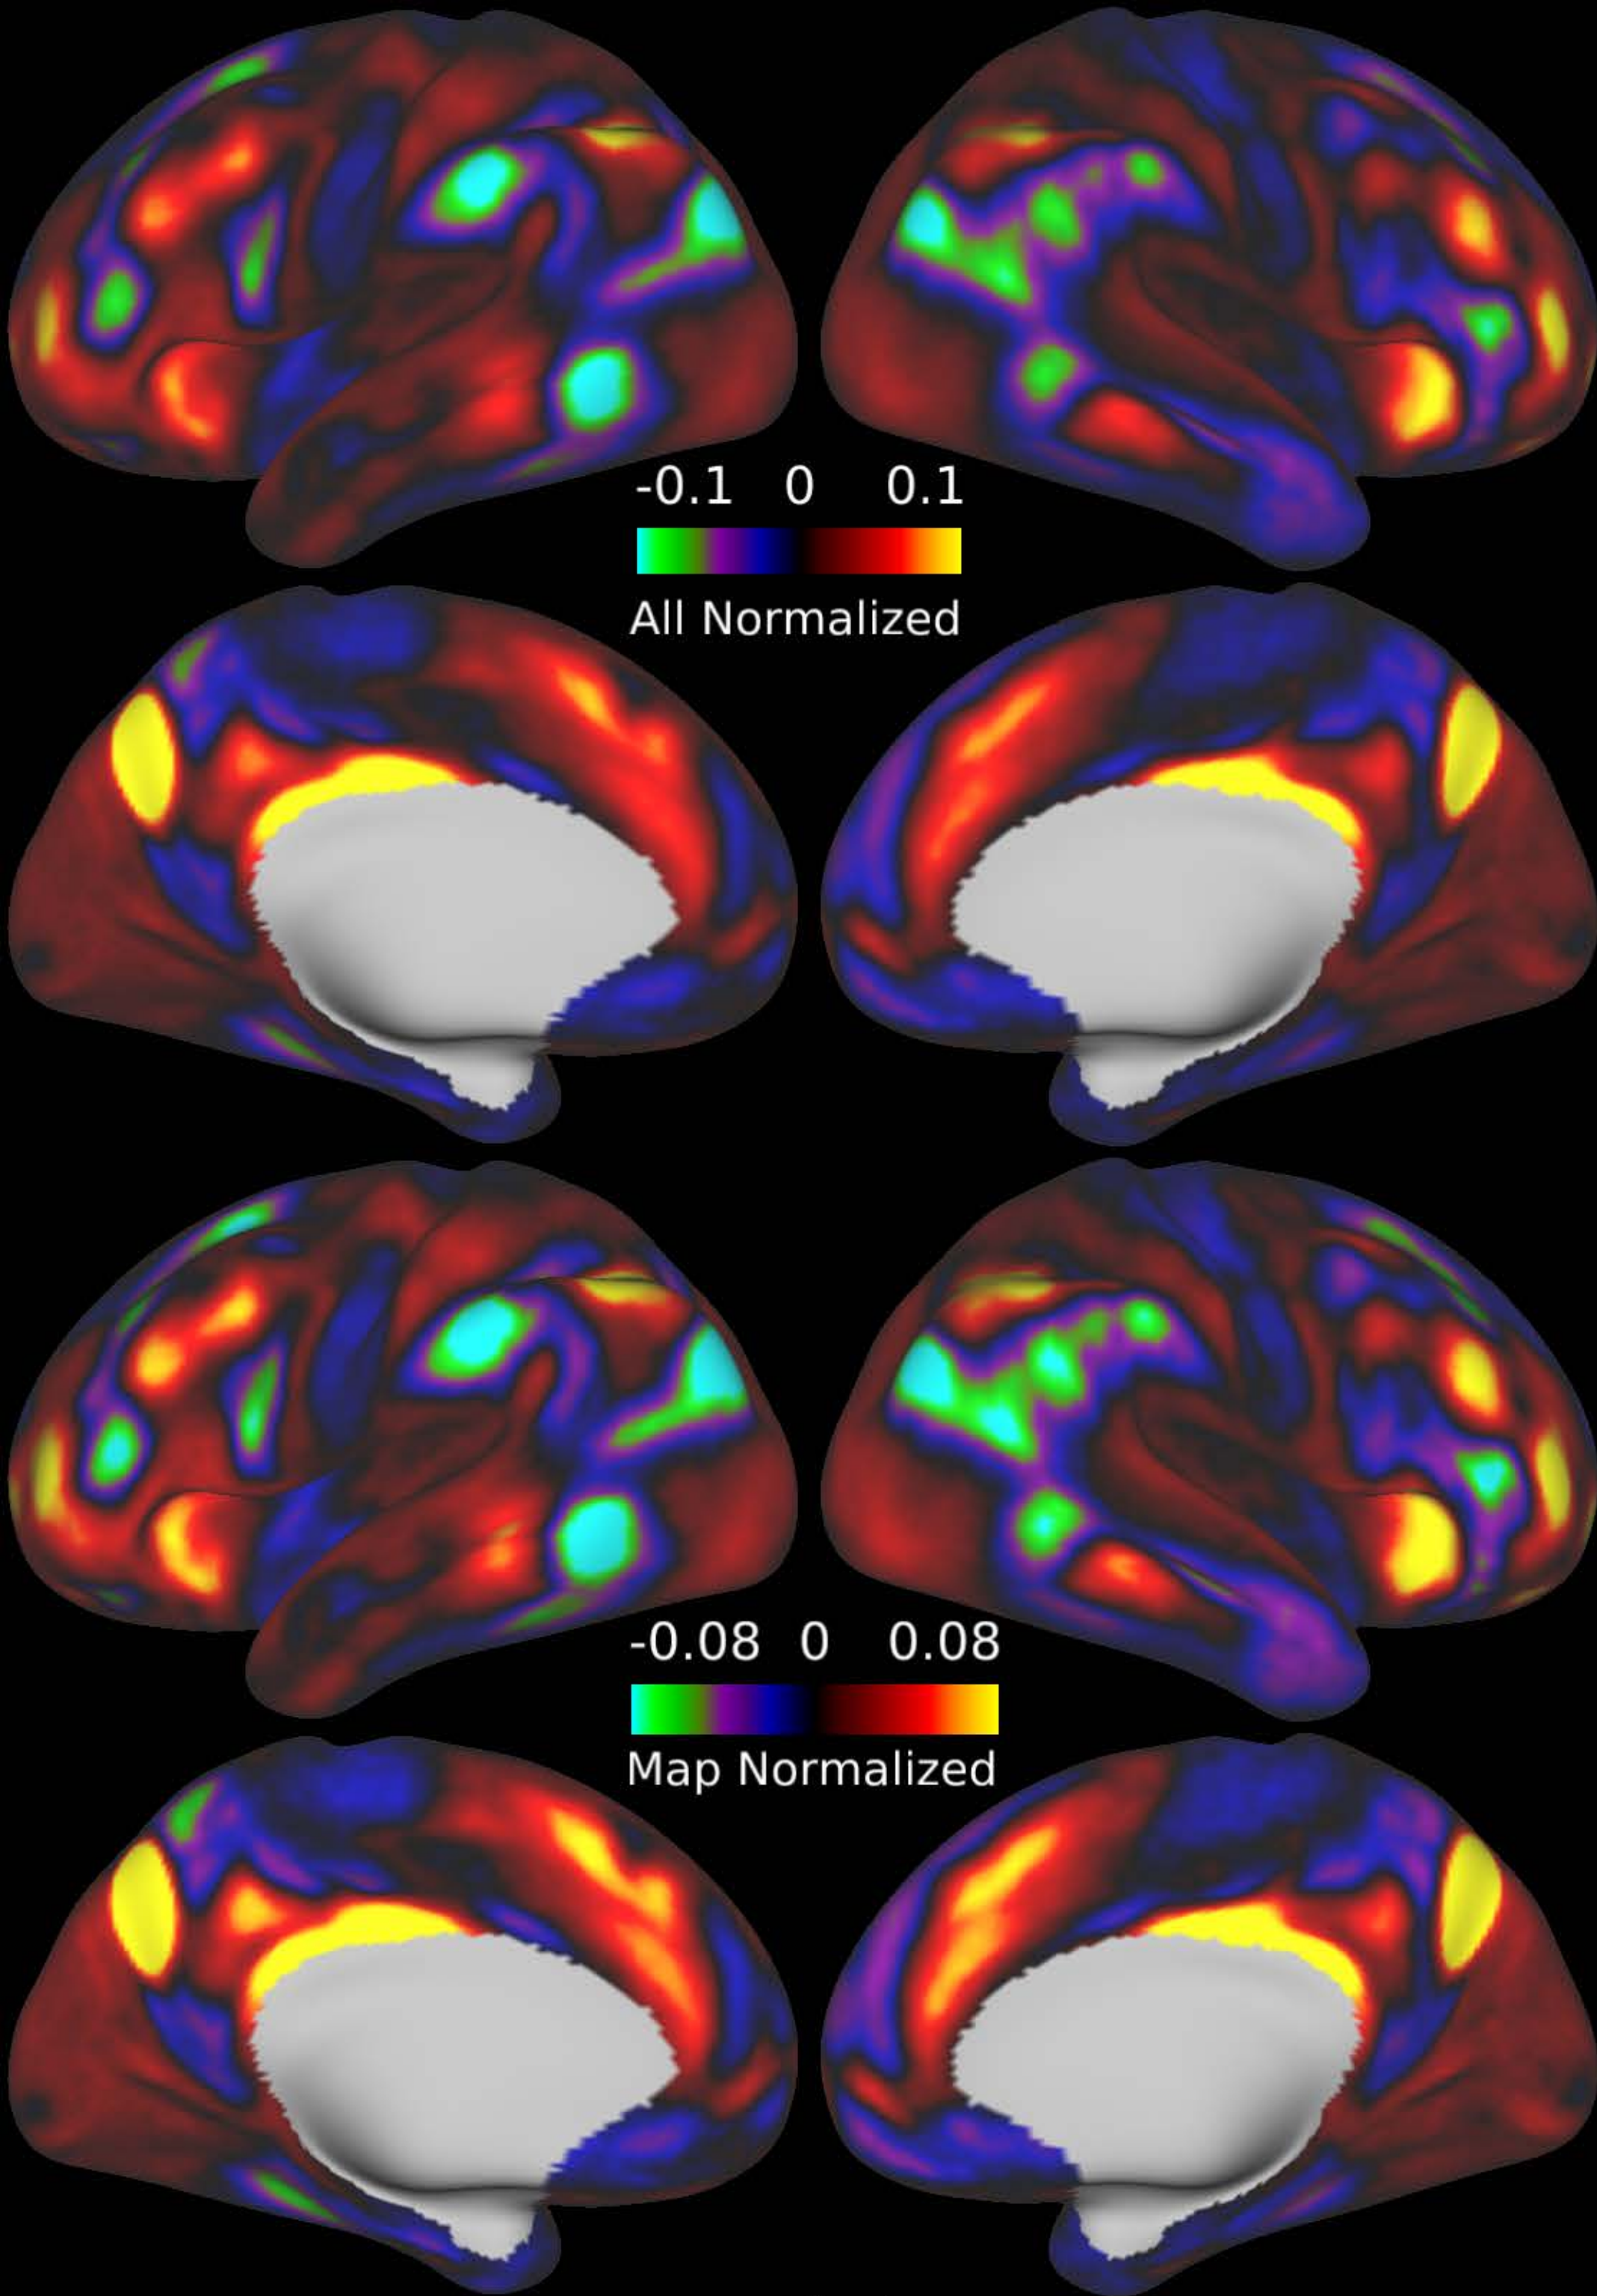

Hertz

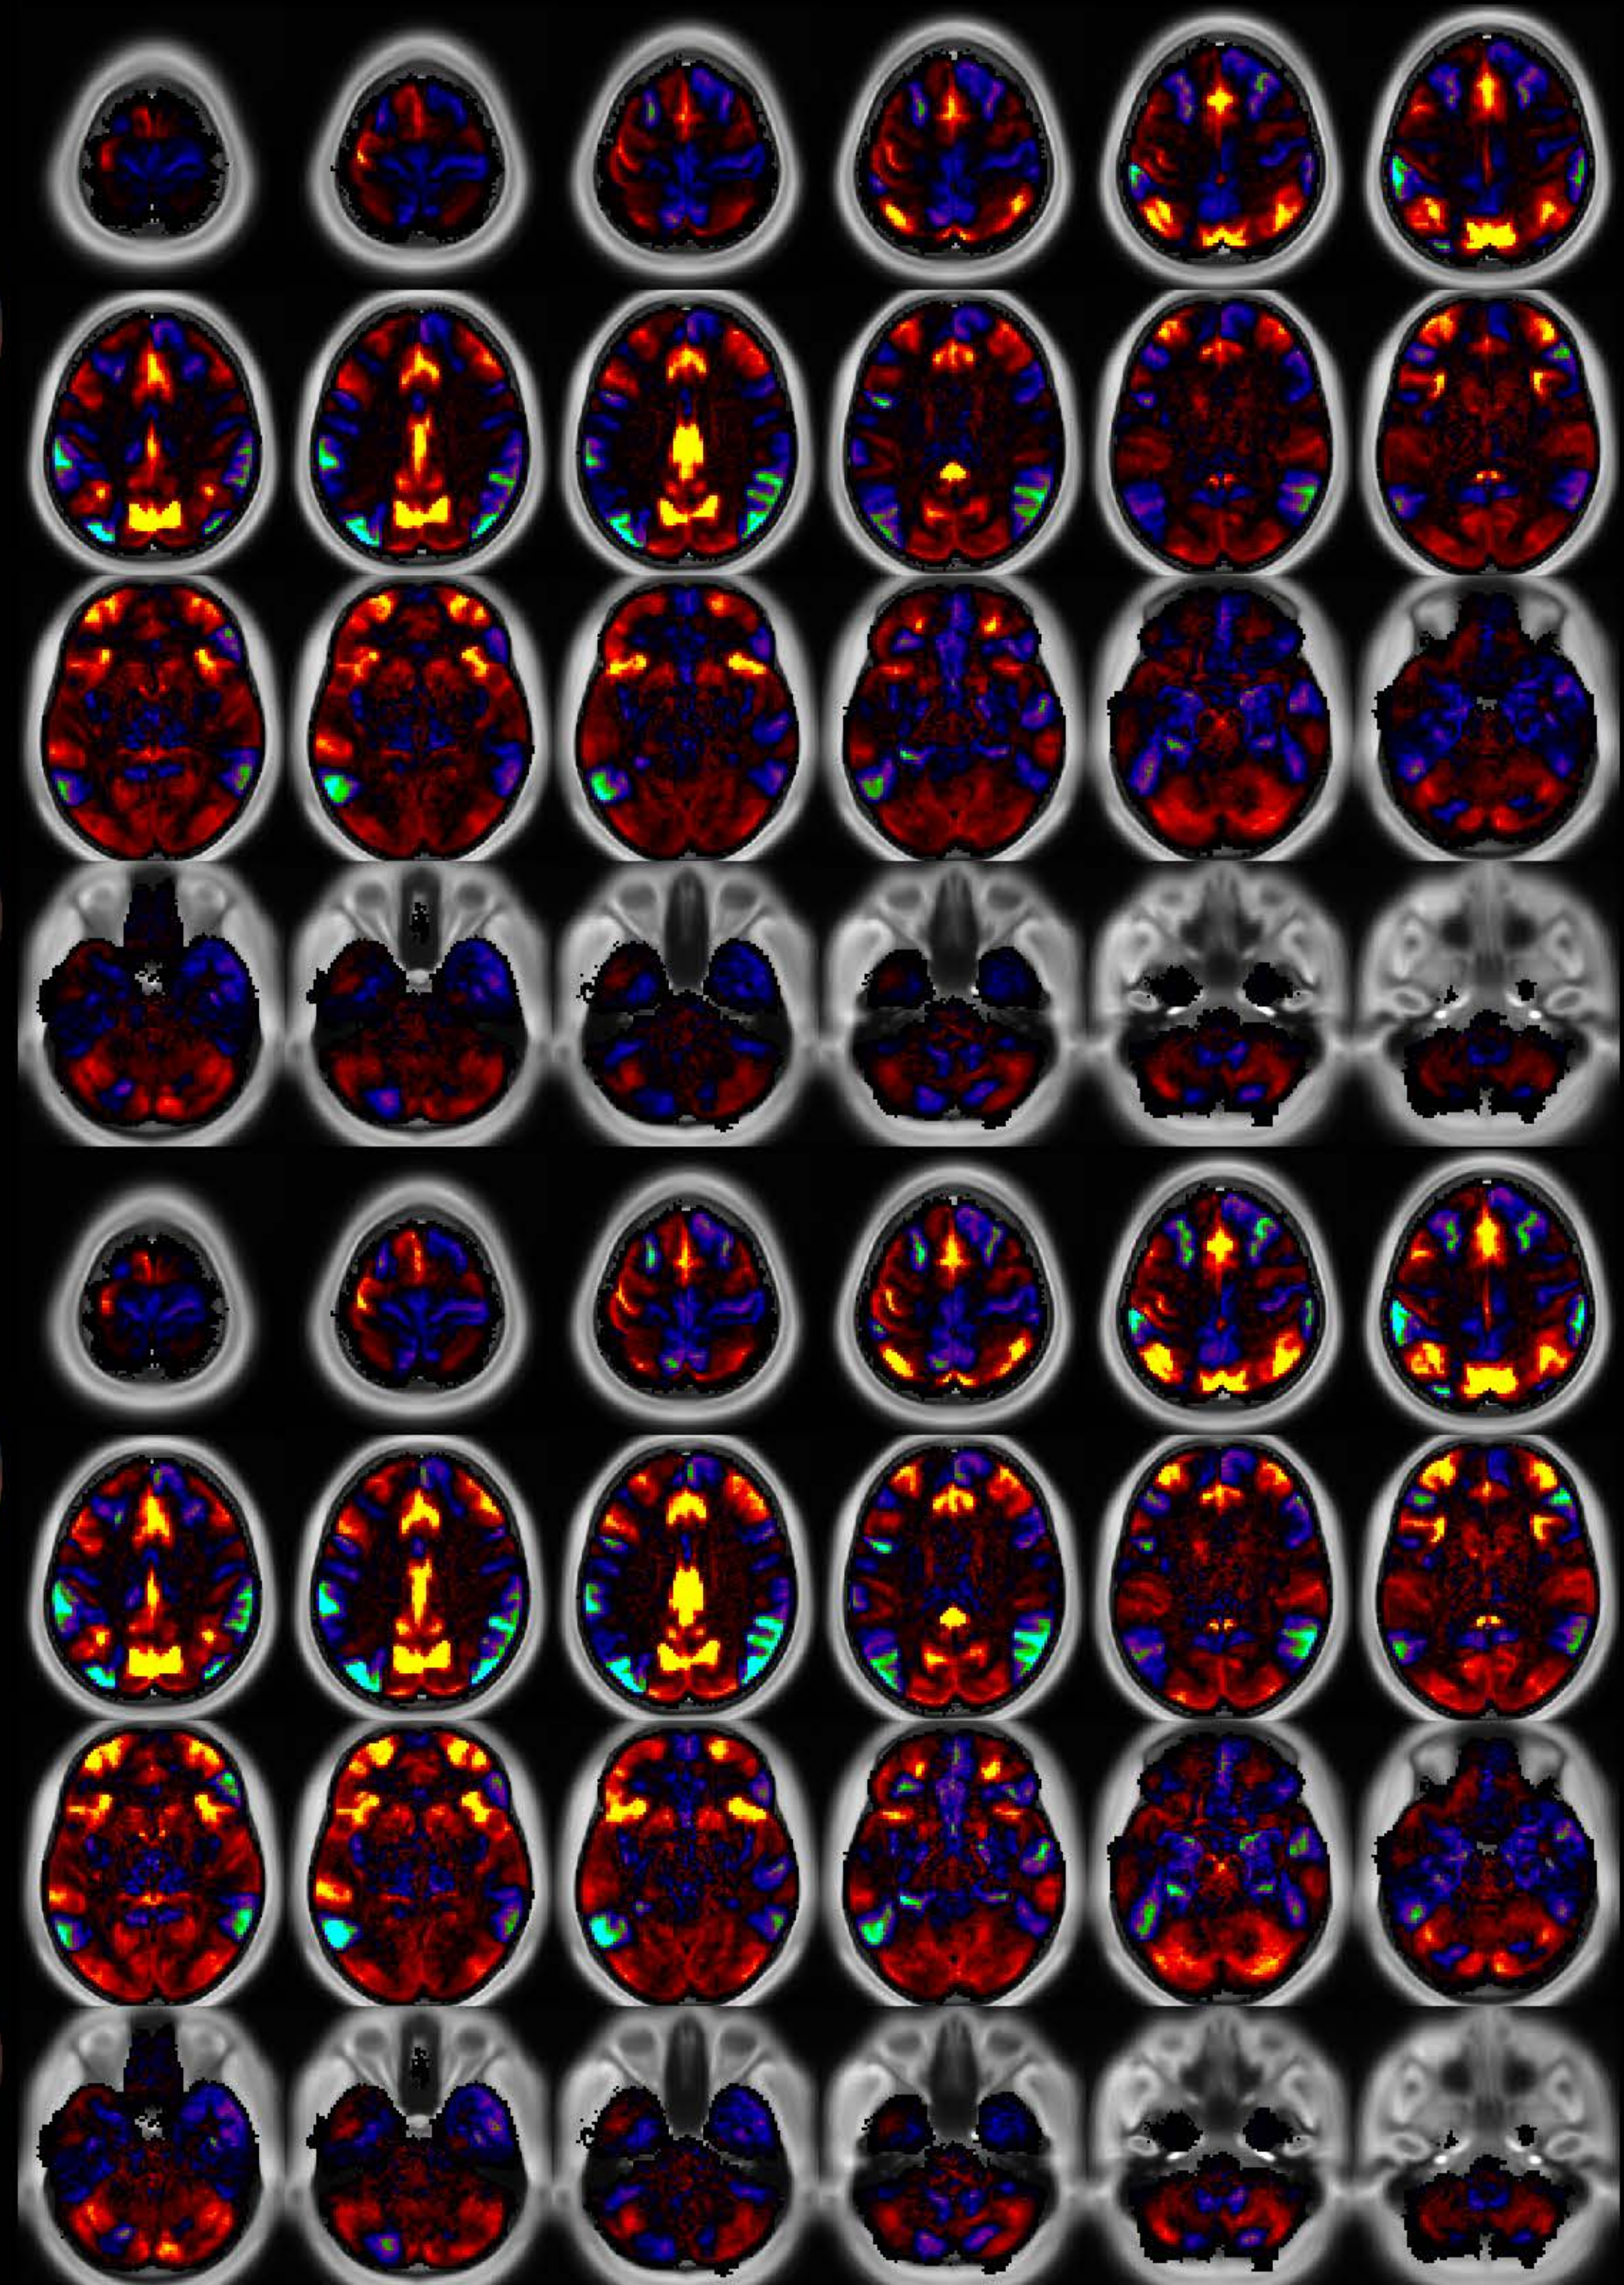

Seconds

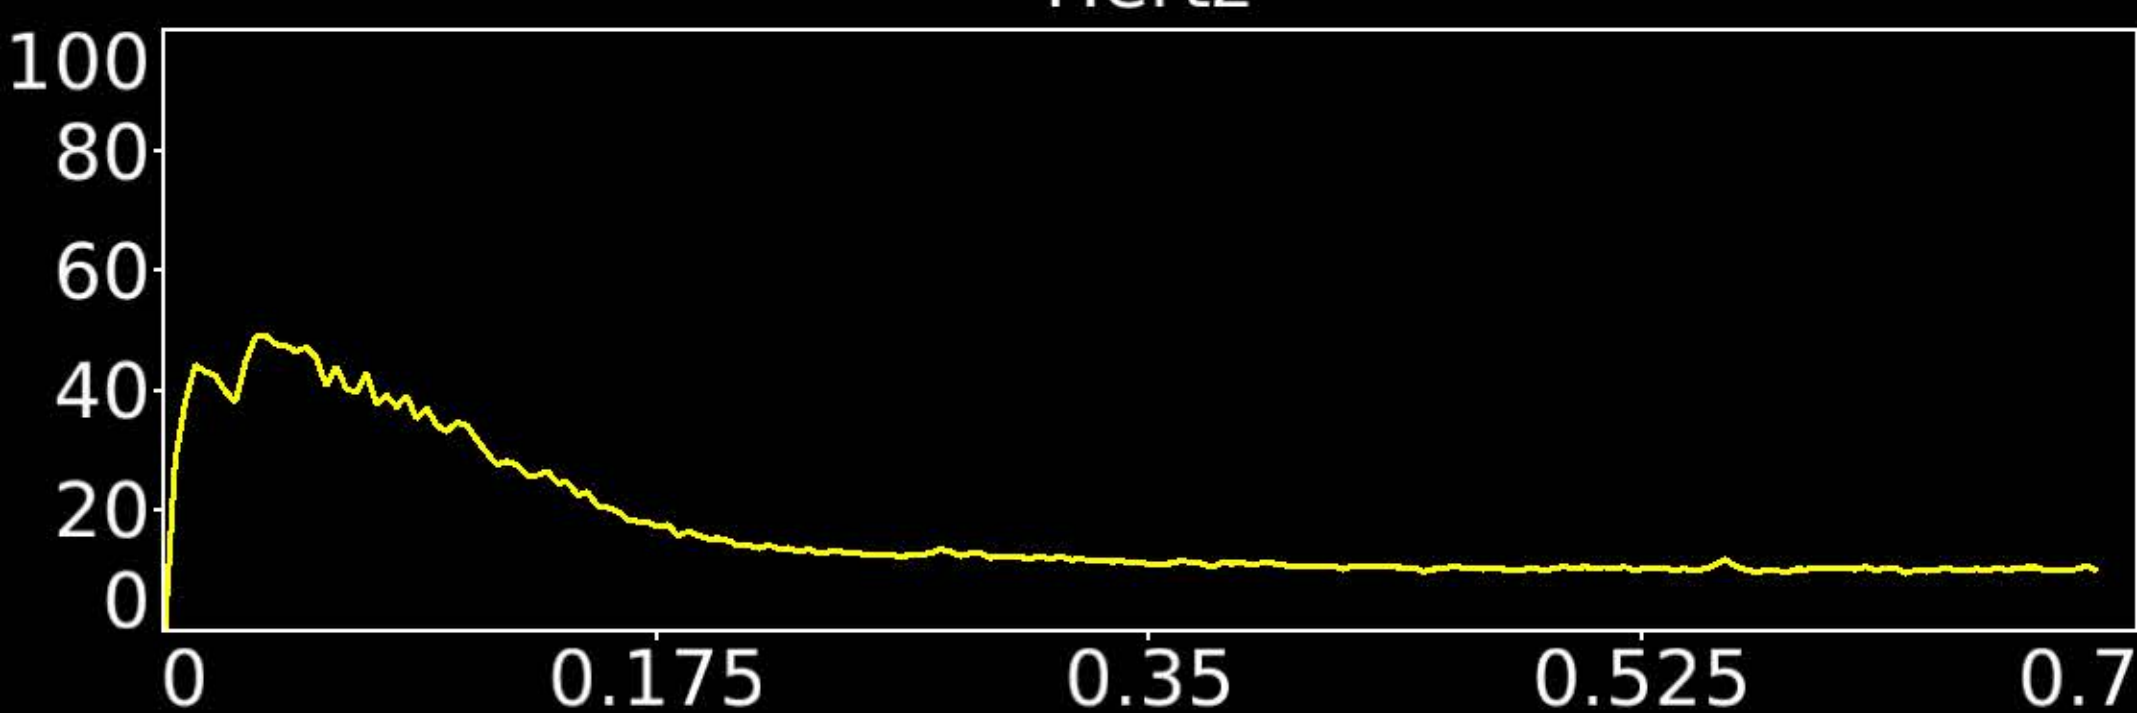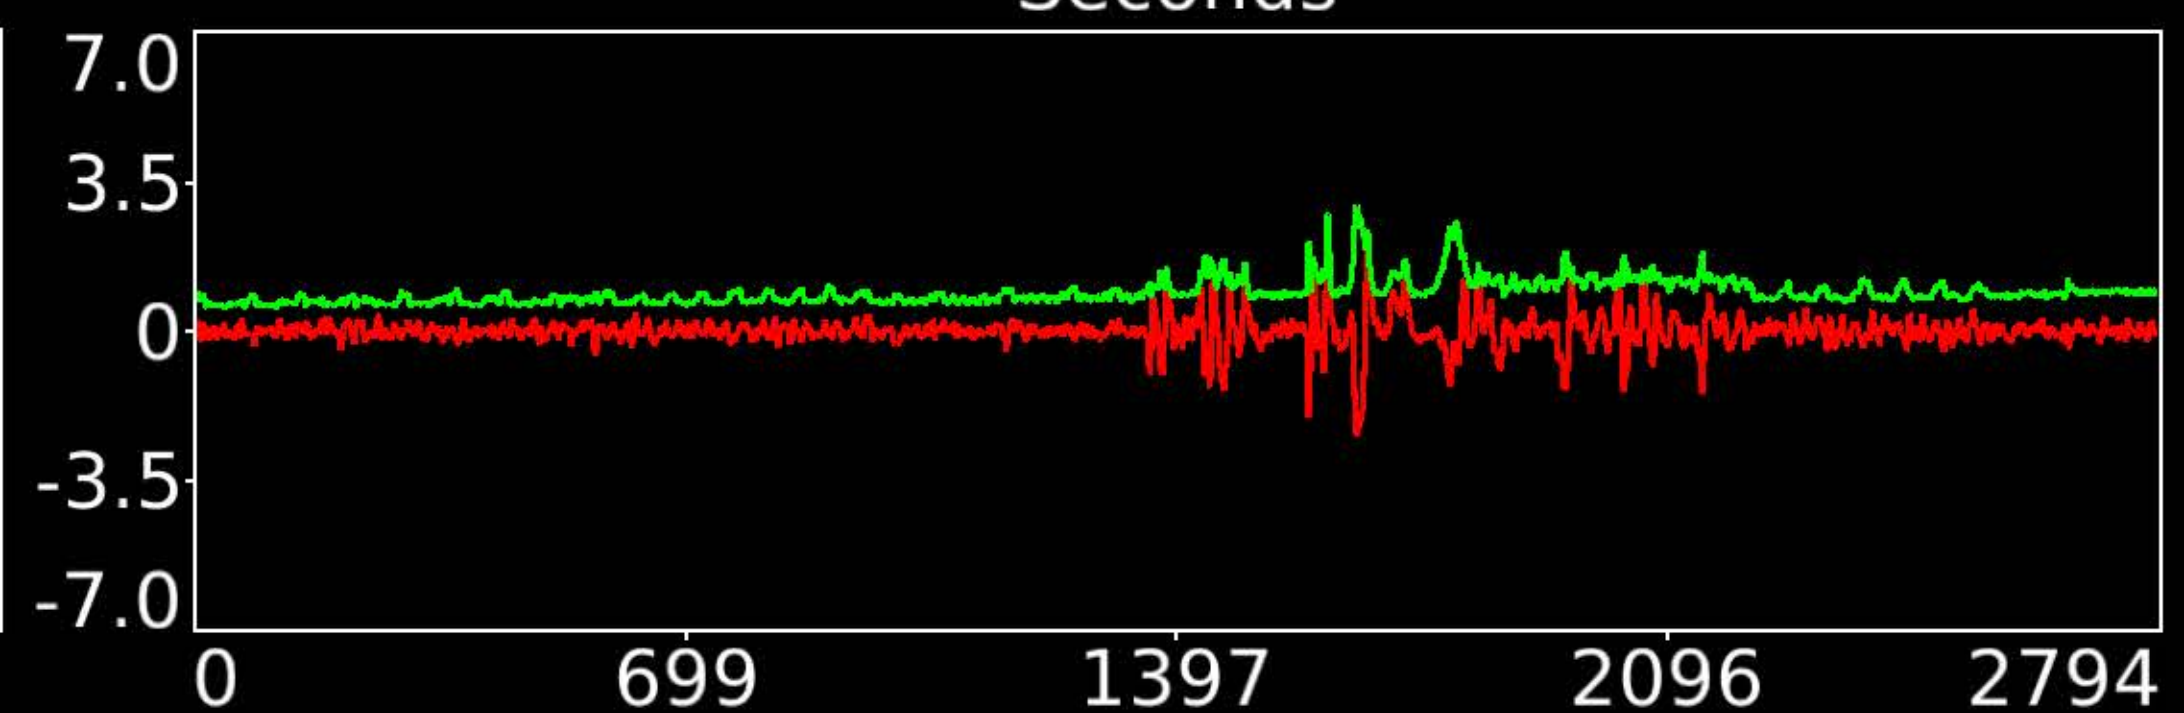

|                                                                                                                       |                            |                                   |  |
|-----------------------------------------------------------------------------------------------------------------------|----------------------------|-----------------------------------|--|
| Number & Class: 21 Signal                                                                                             |                            | Name: POS2 + RSC vs Unknown       |  |
| RVT Correlated: No                                                                                                    | DVARS Dip Associated: No   | Cross-Subject Variable: No        |  |
| Single Subject: No                                                                                                    | % Variance Explained: 1.74 | Globality Index: 0.7              |  |
| Task Component: 13                                                                                                    | Rest Component: 37         | Task Modulated: Language + Social |  |
| Rationale: Spatial map includes positive and negative patches that respect known areal boundaries (e.g. POS2 and RSC) |                            |                                   |  |



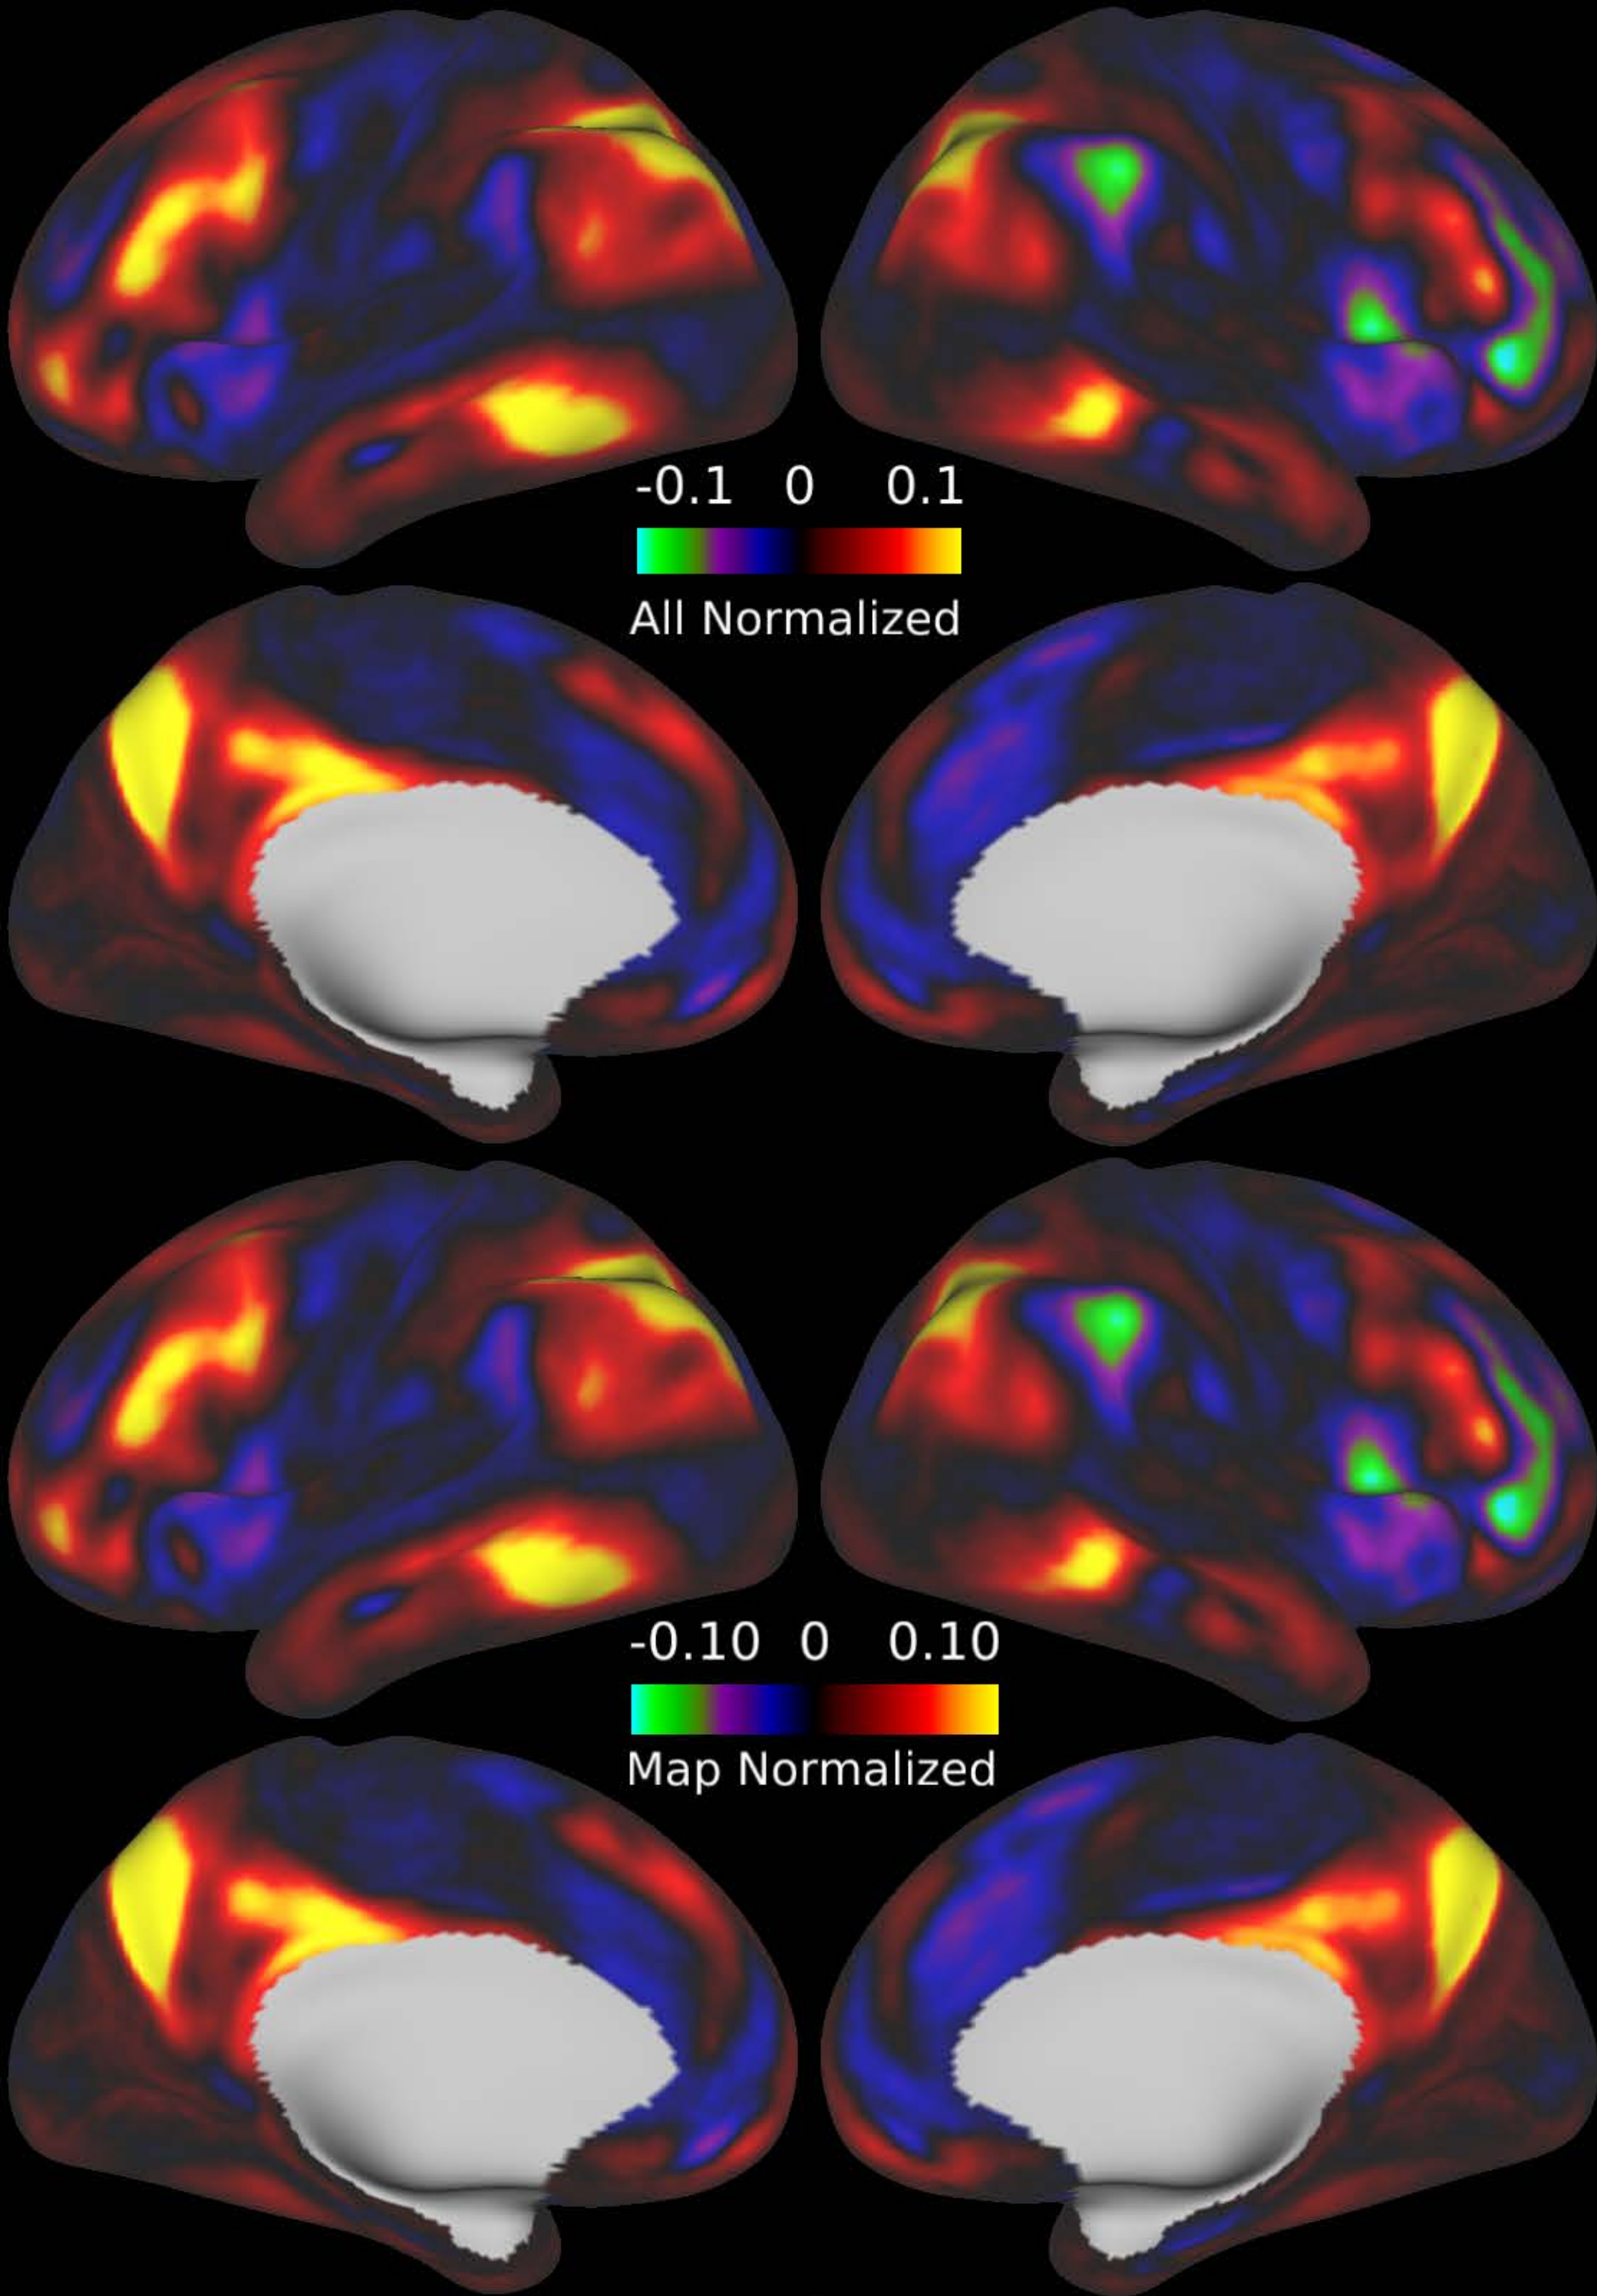

Hertz

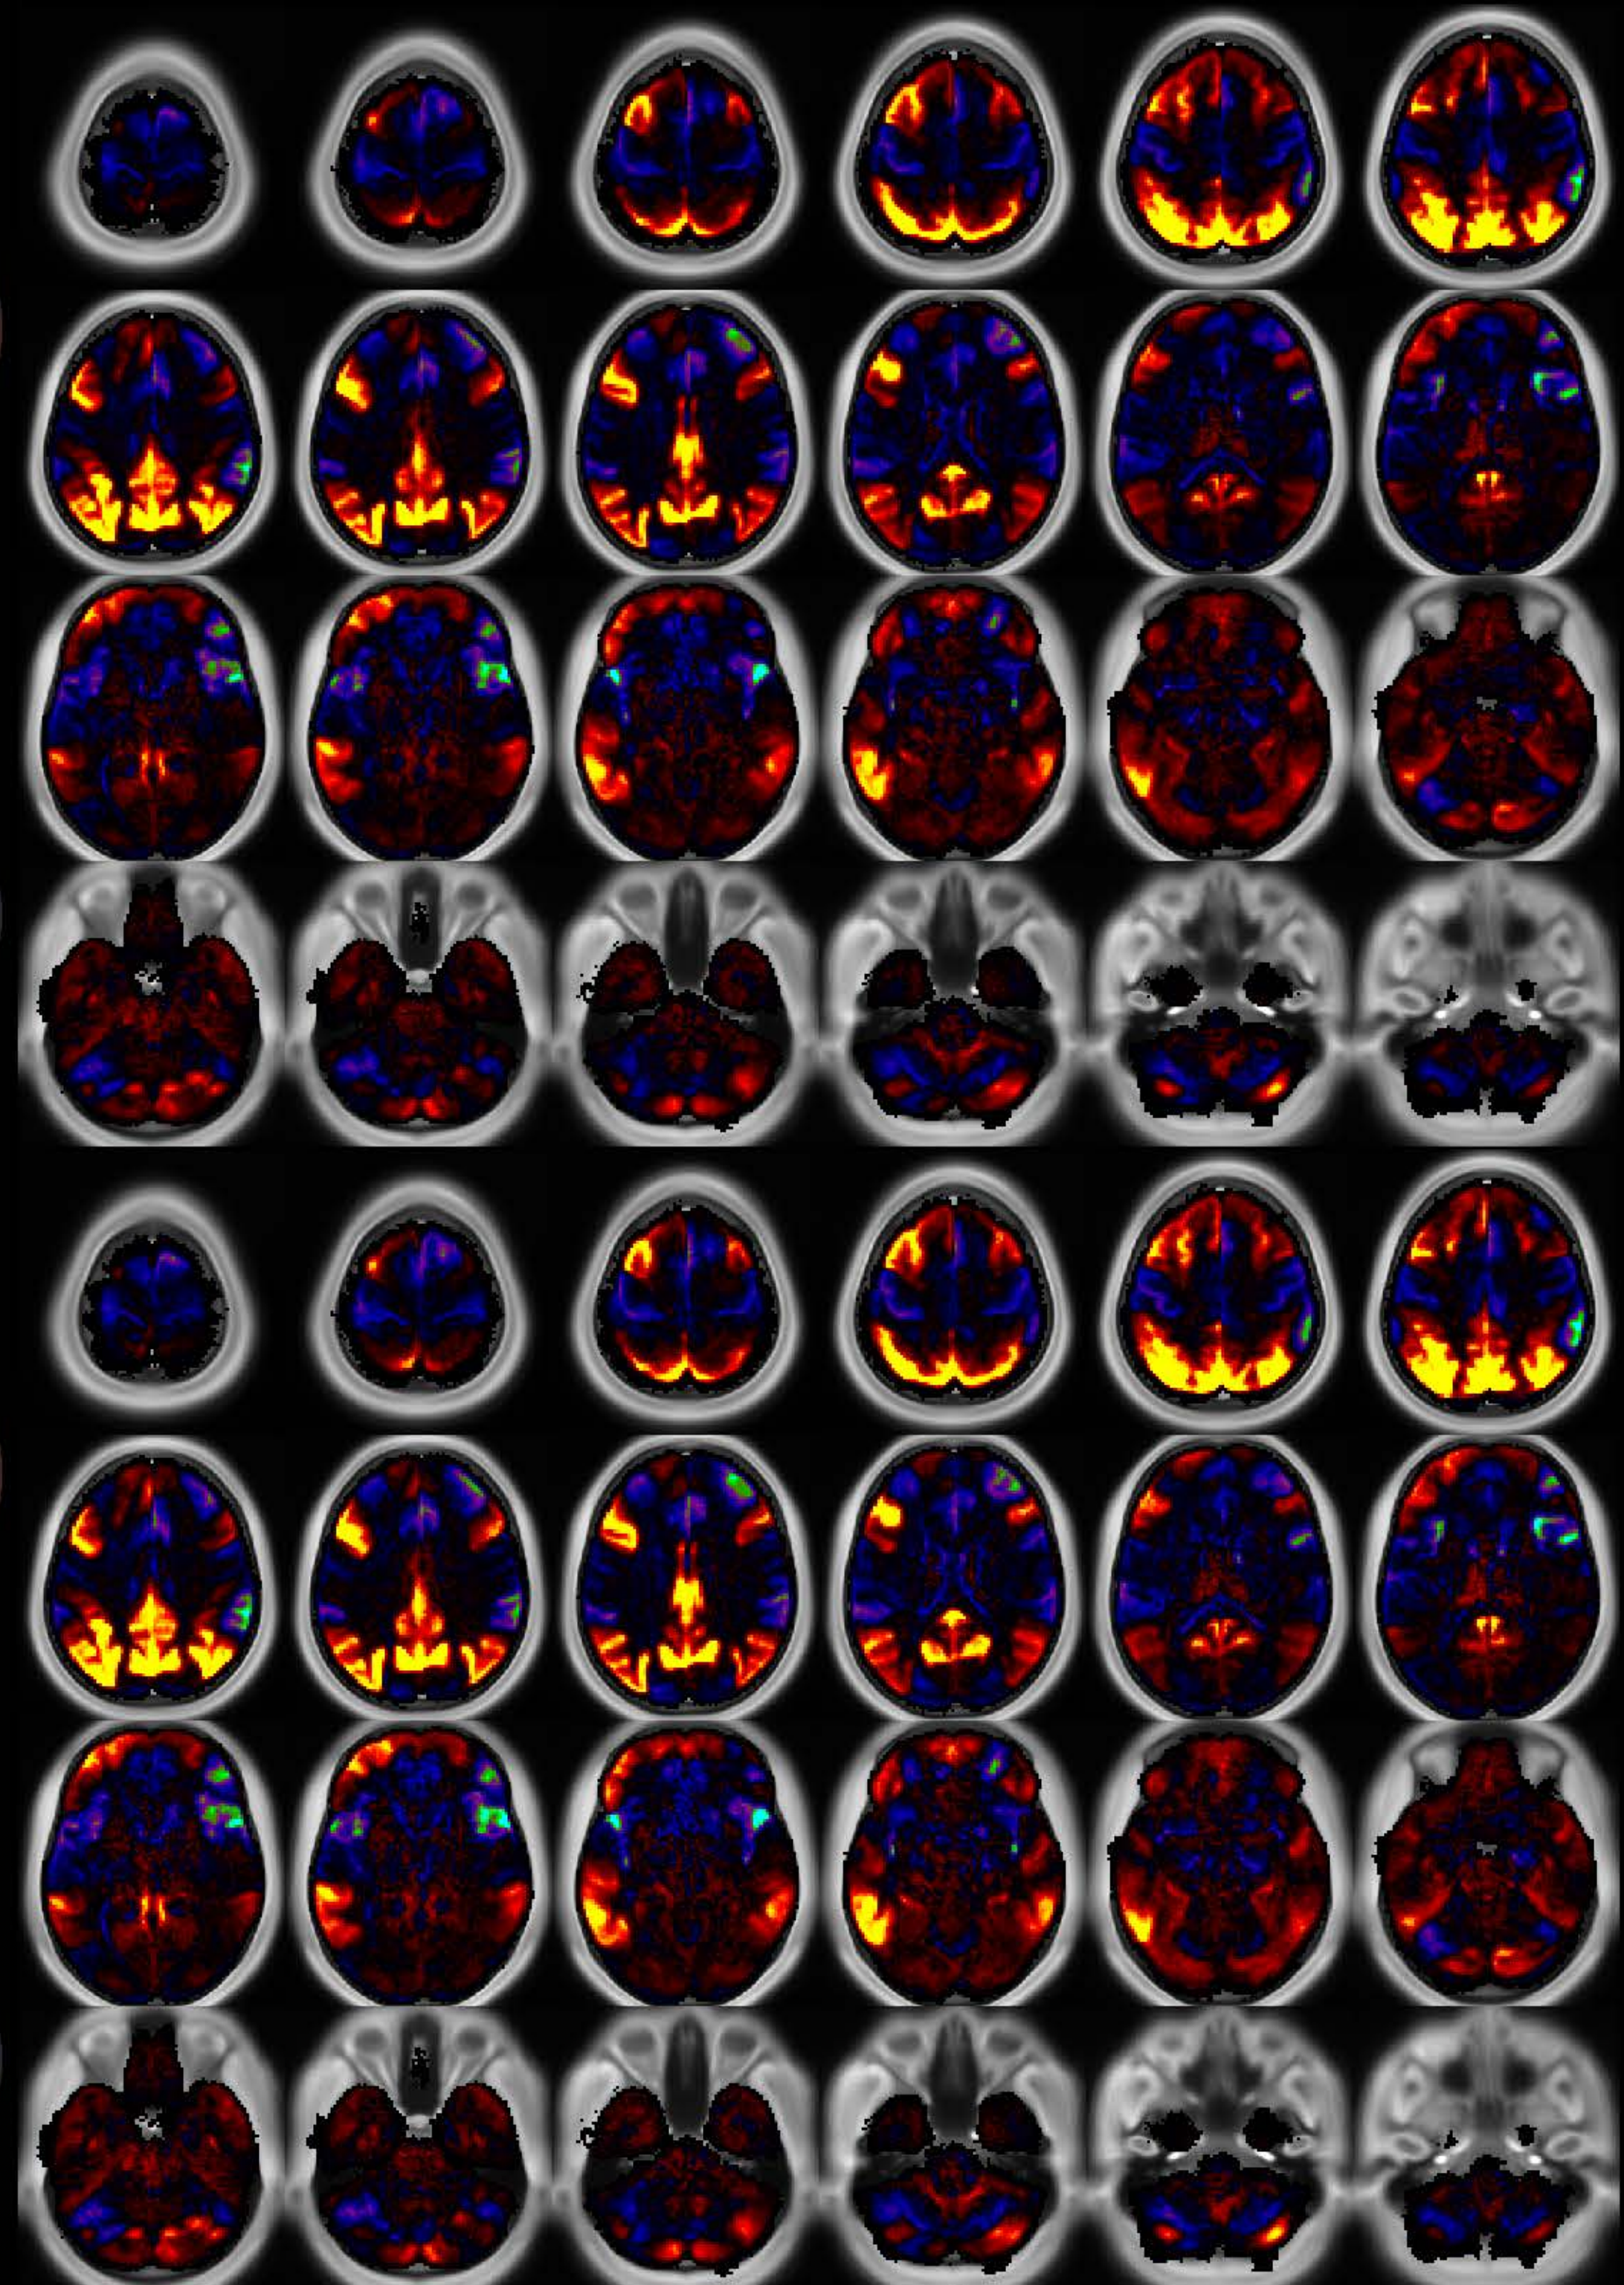

Seconds

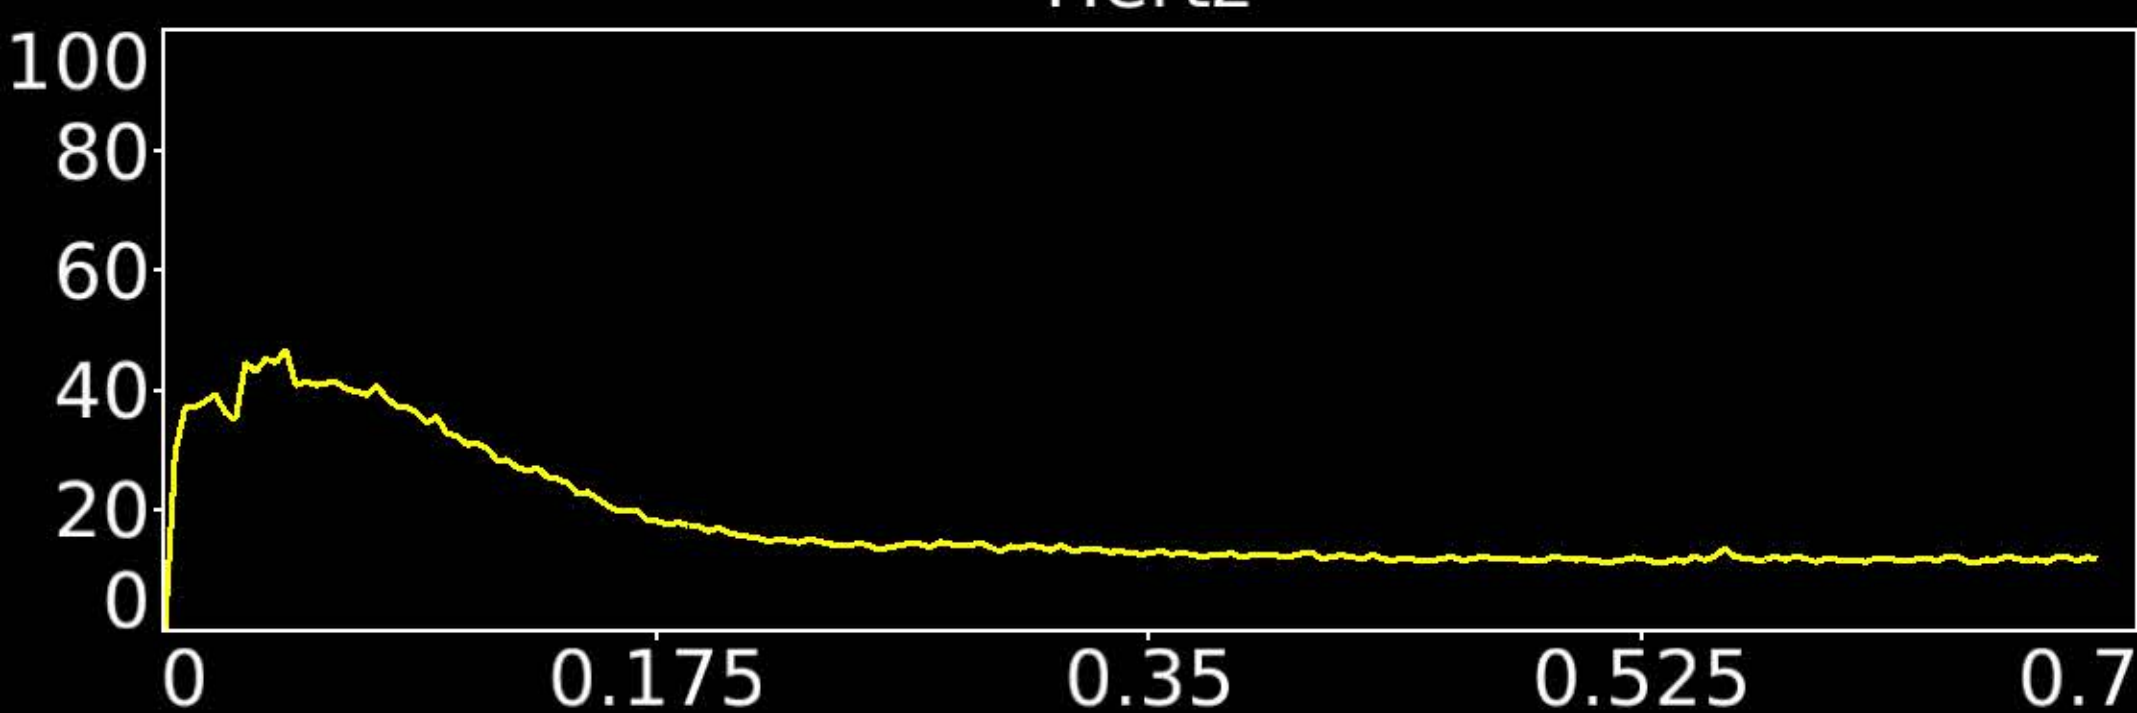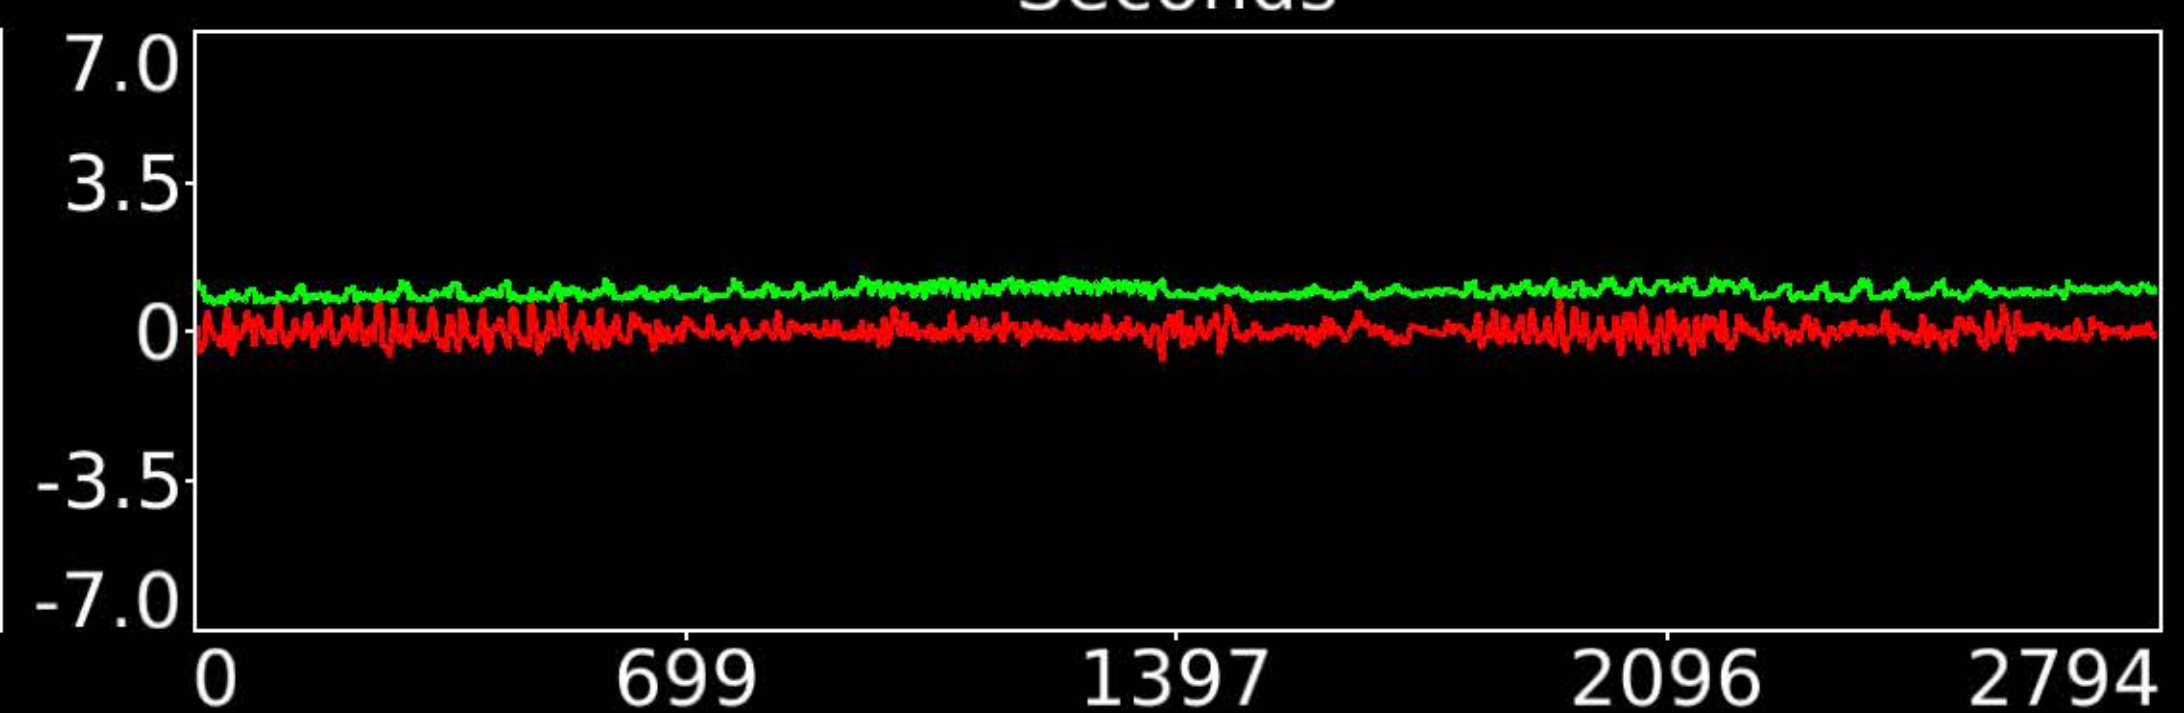

|                           |                            |                            |  |
|---------------------------|----------------------------|----------------------------|--|
| Number & Class: 22 Signal |                            | Name: POS + RSC + IPS      |  |
| RVT Correlated: No        | DVARS Dip Associated: No   | Cross-Subject Variable: No |  |
| Single Subject: No        | % Variance Explained: 1.64 | Globality Index: 0.42      |  |
| Task Component: No        | Rest Component: No         | Task Modulated: No         |  |

Rationale: Spatial map includes positive and negative patches that respect known areal boundaries (e.g. POS2 and RSC)



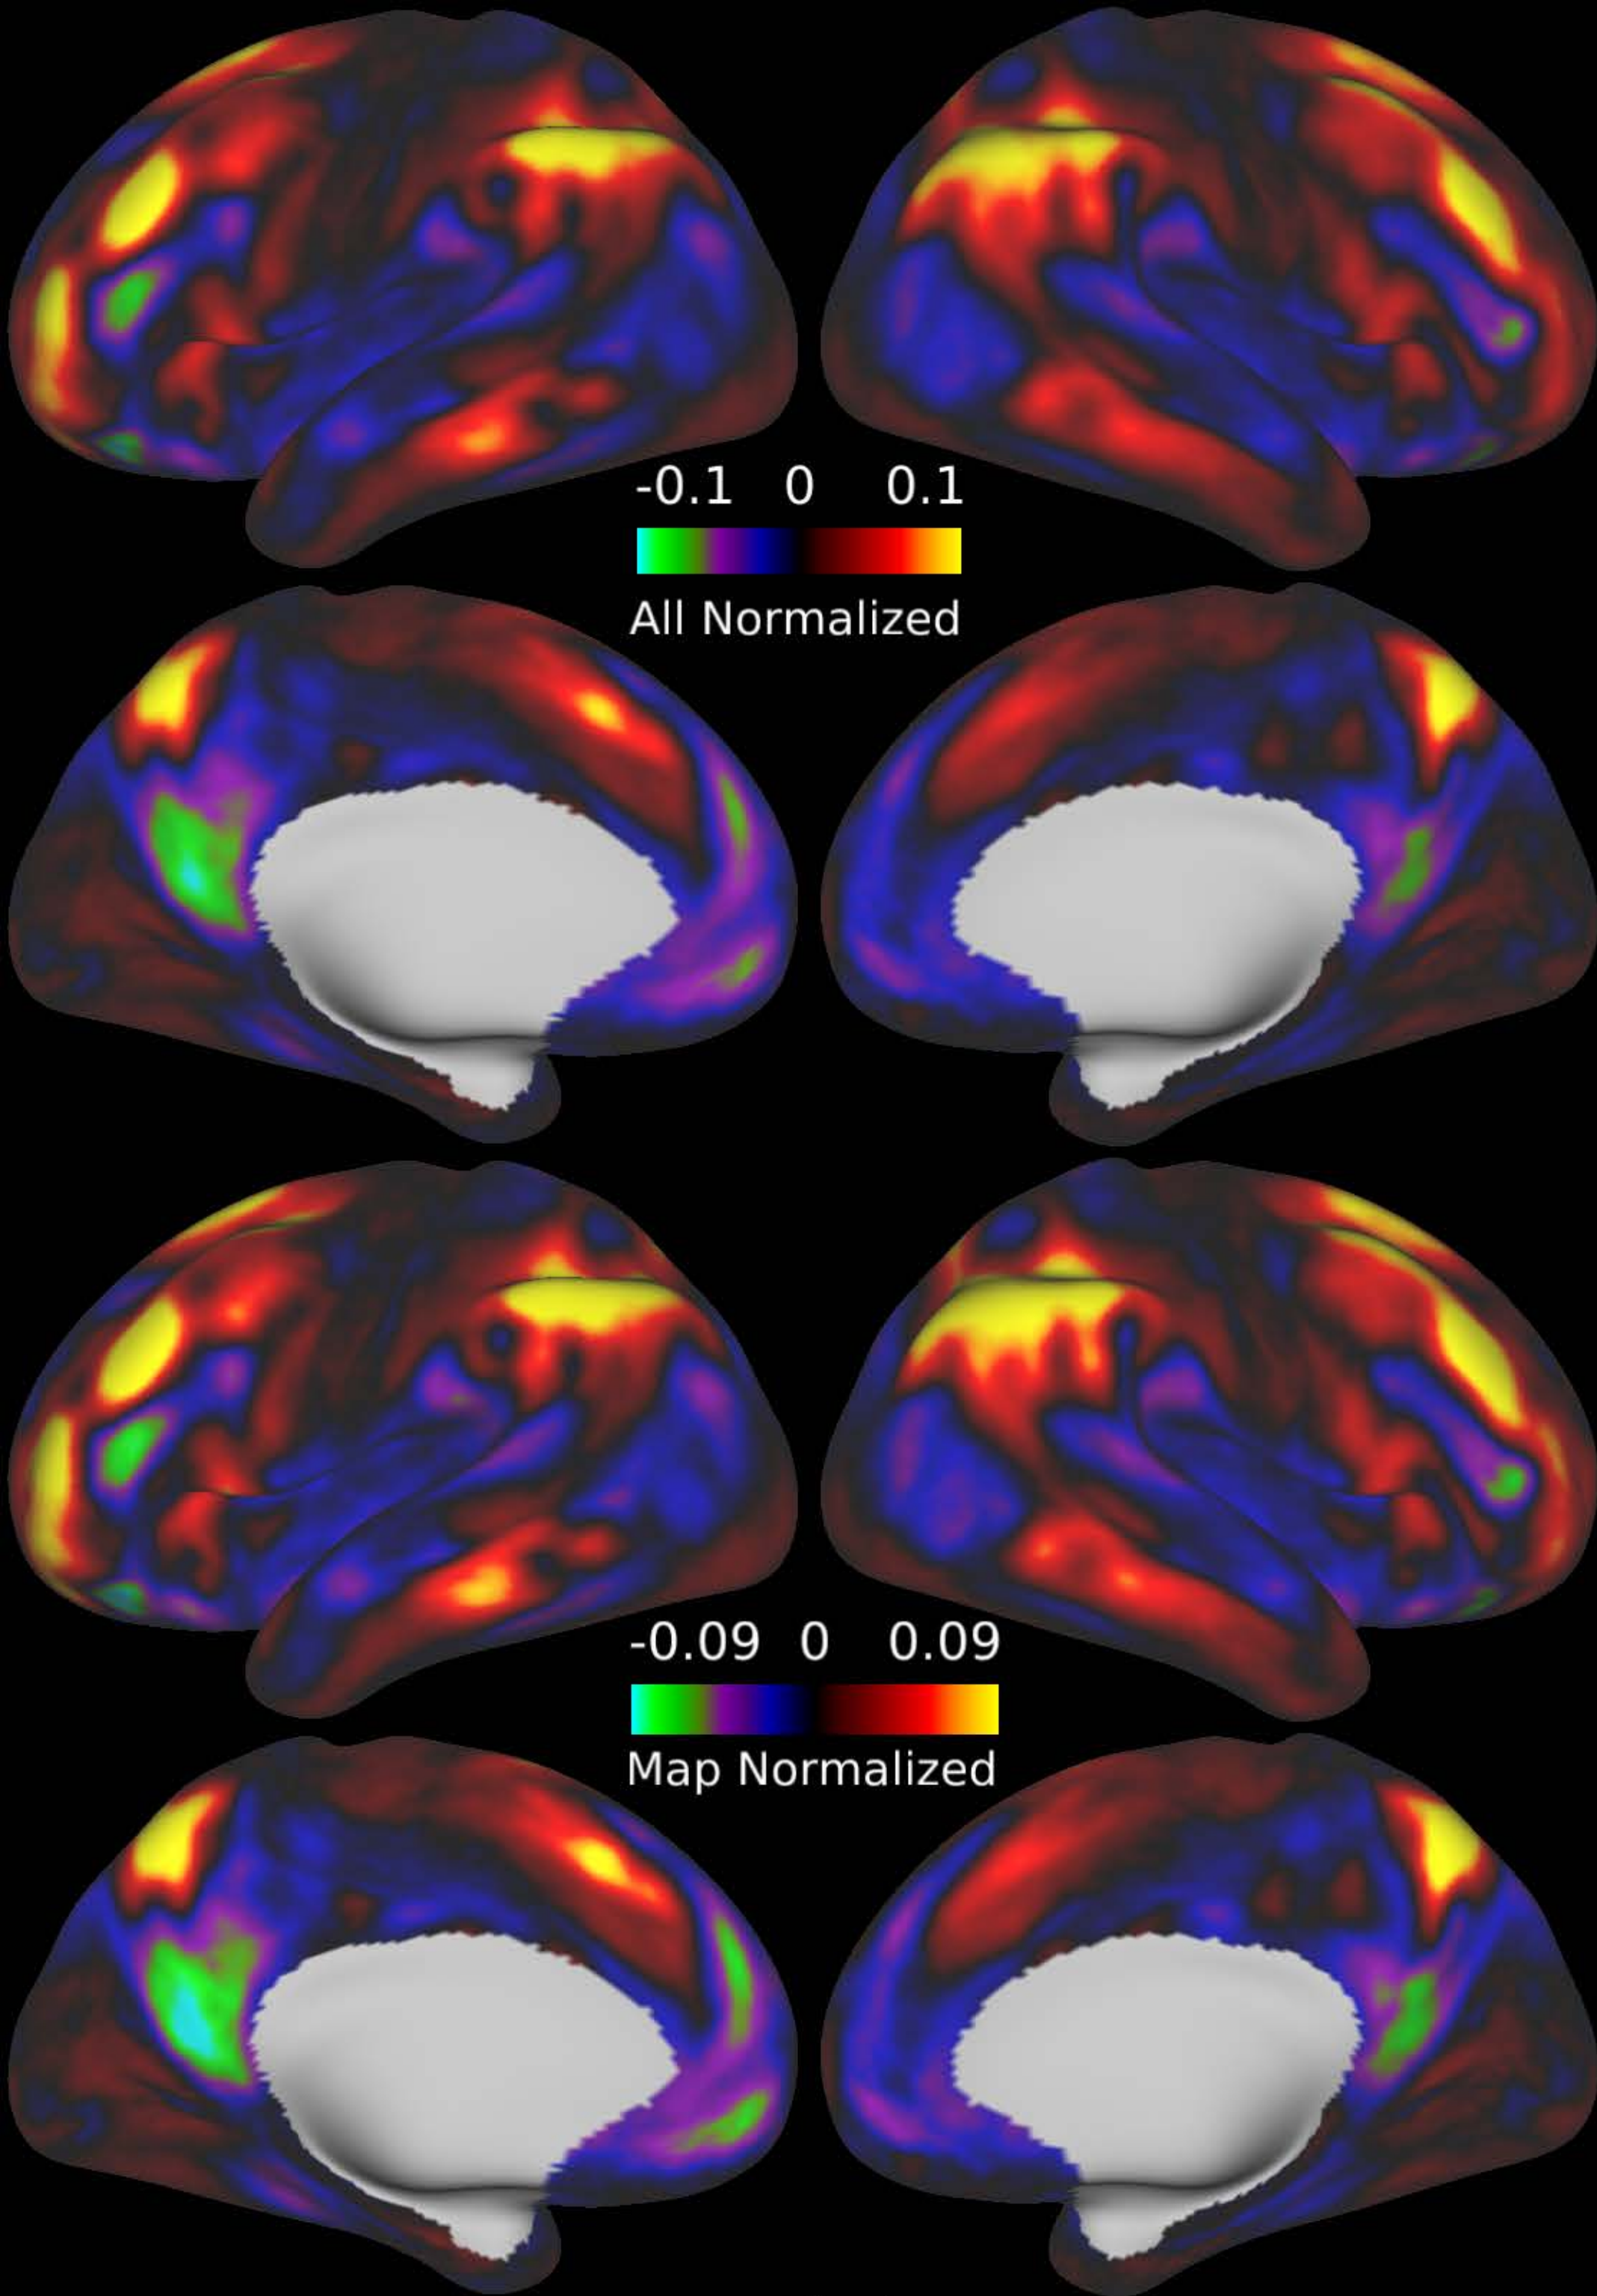

Hertz

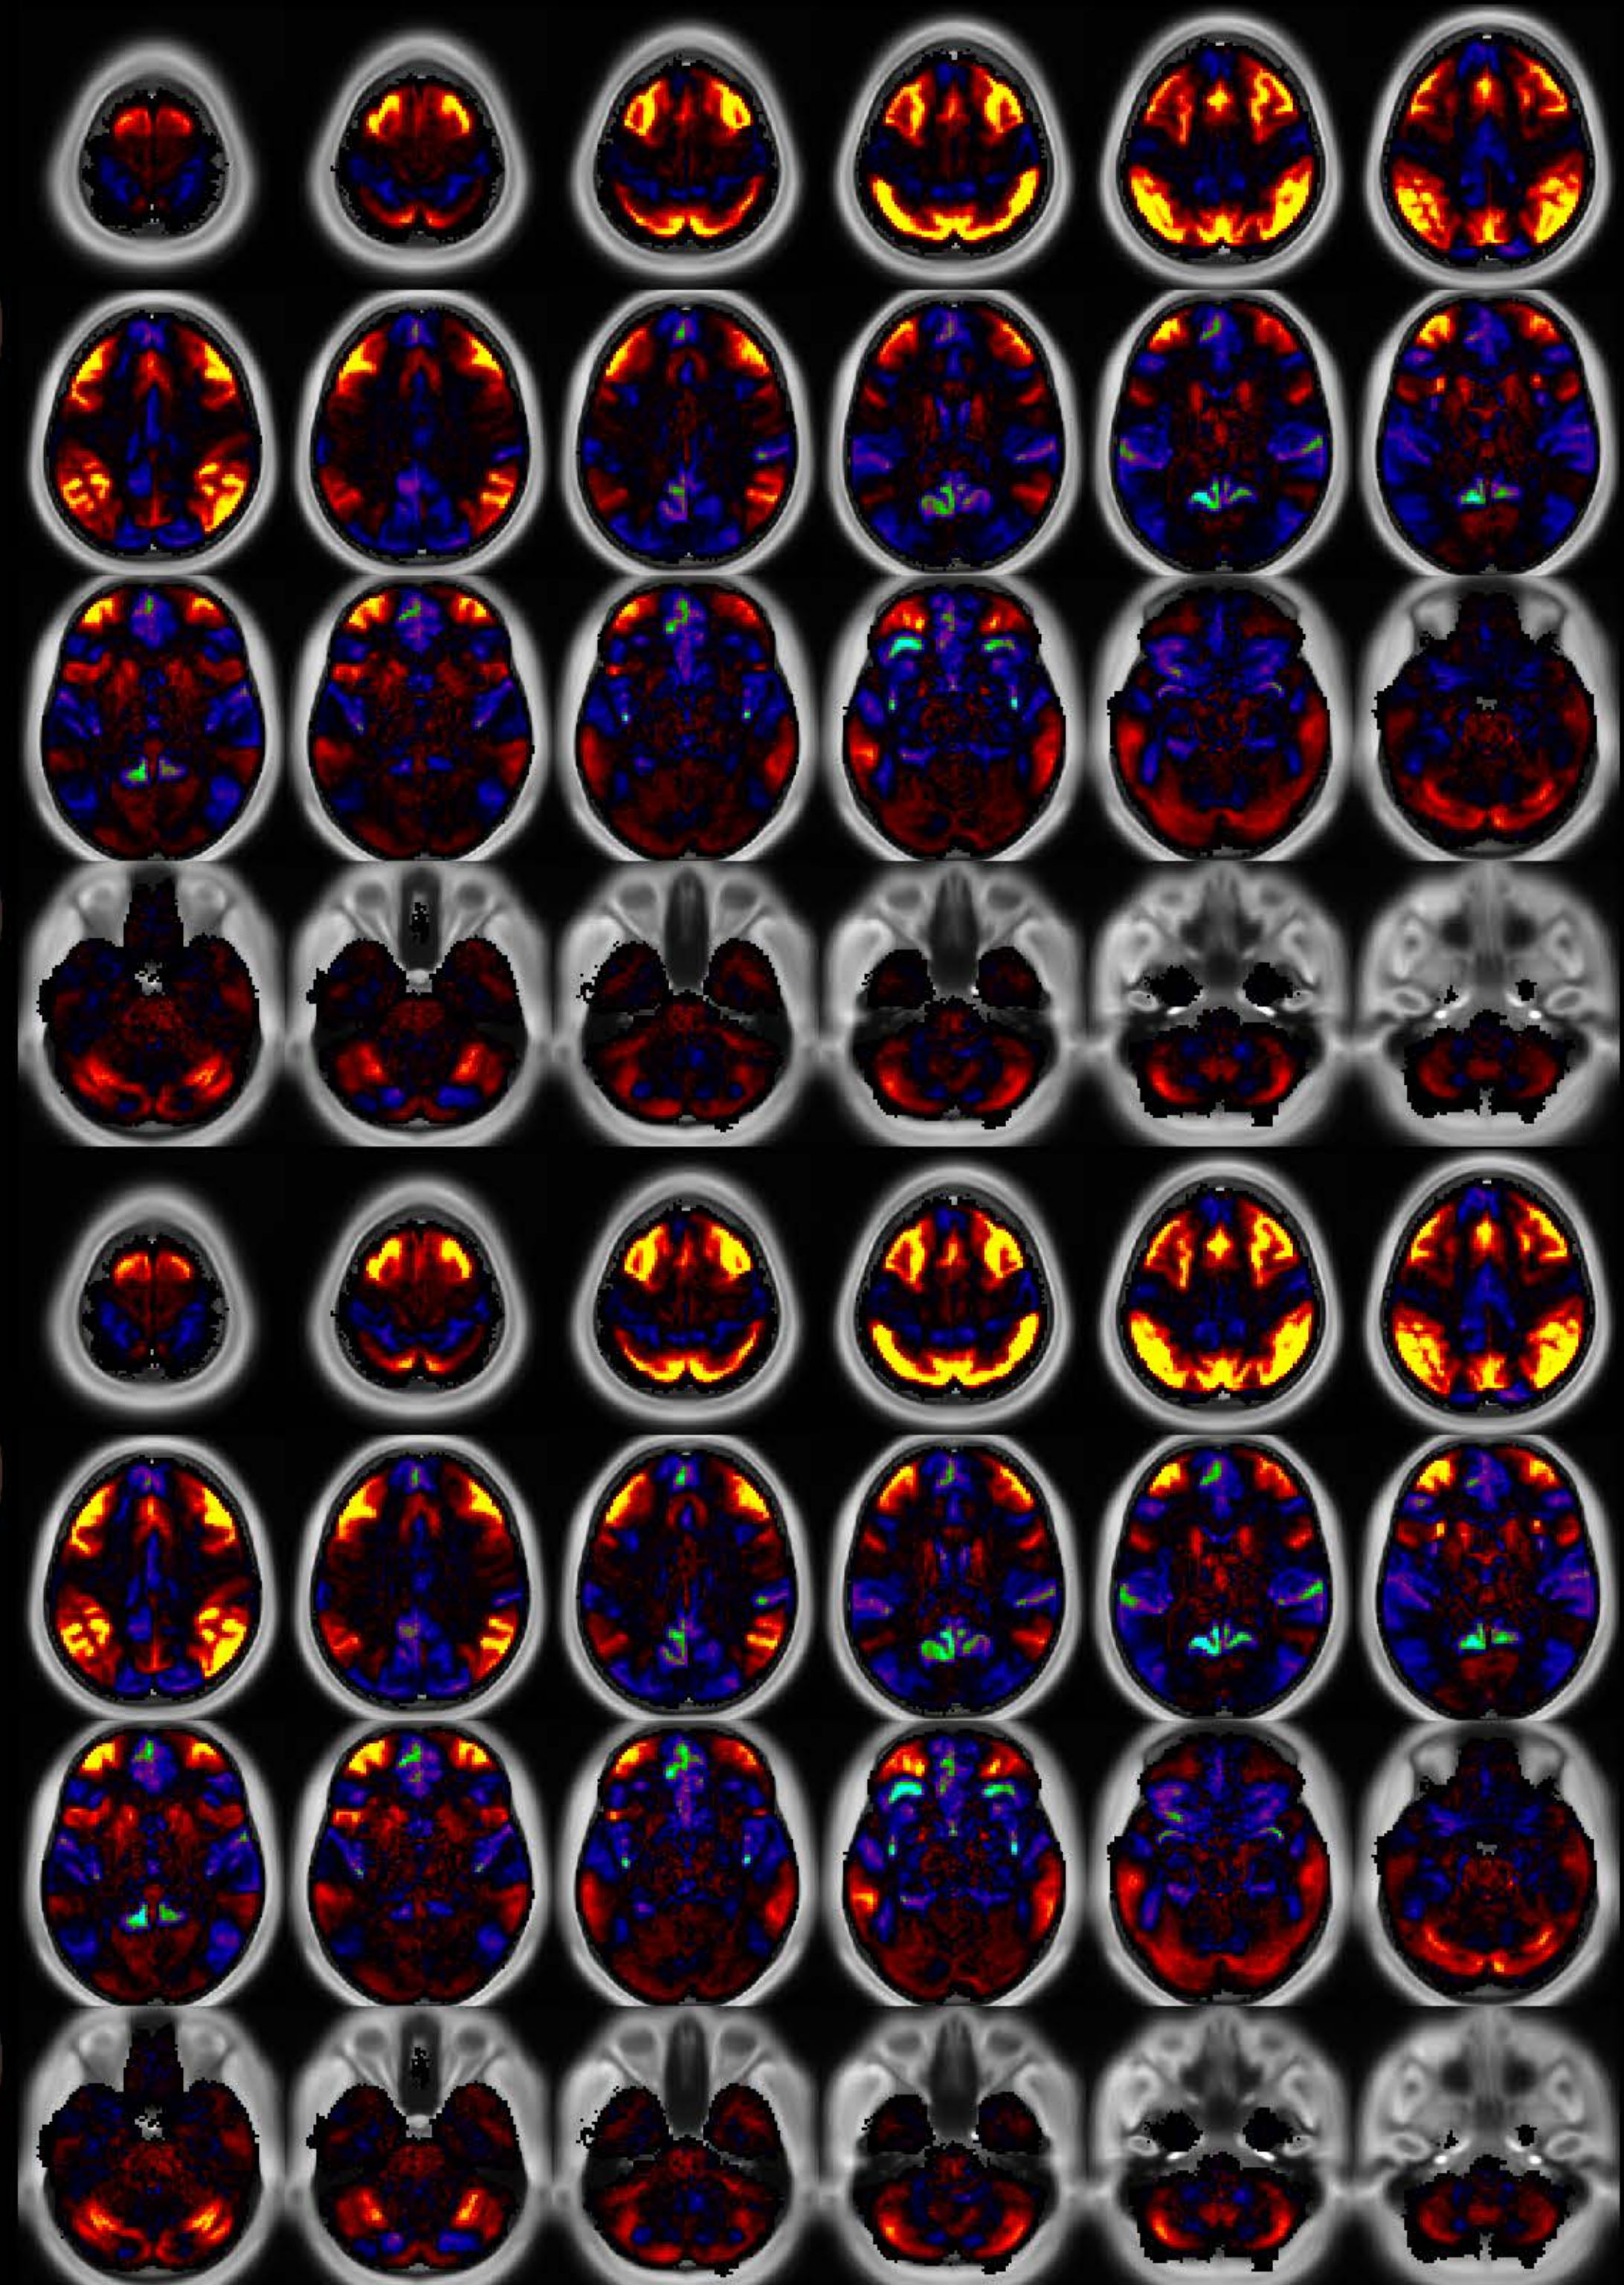

Seconds

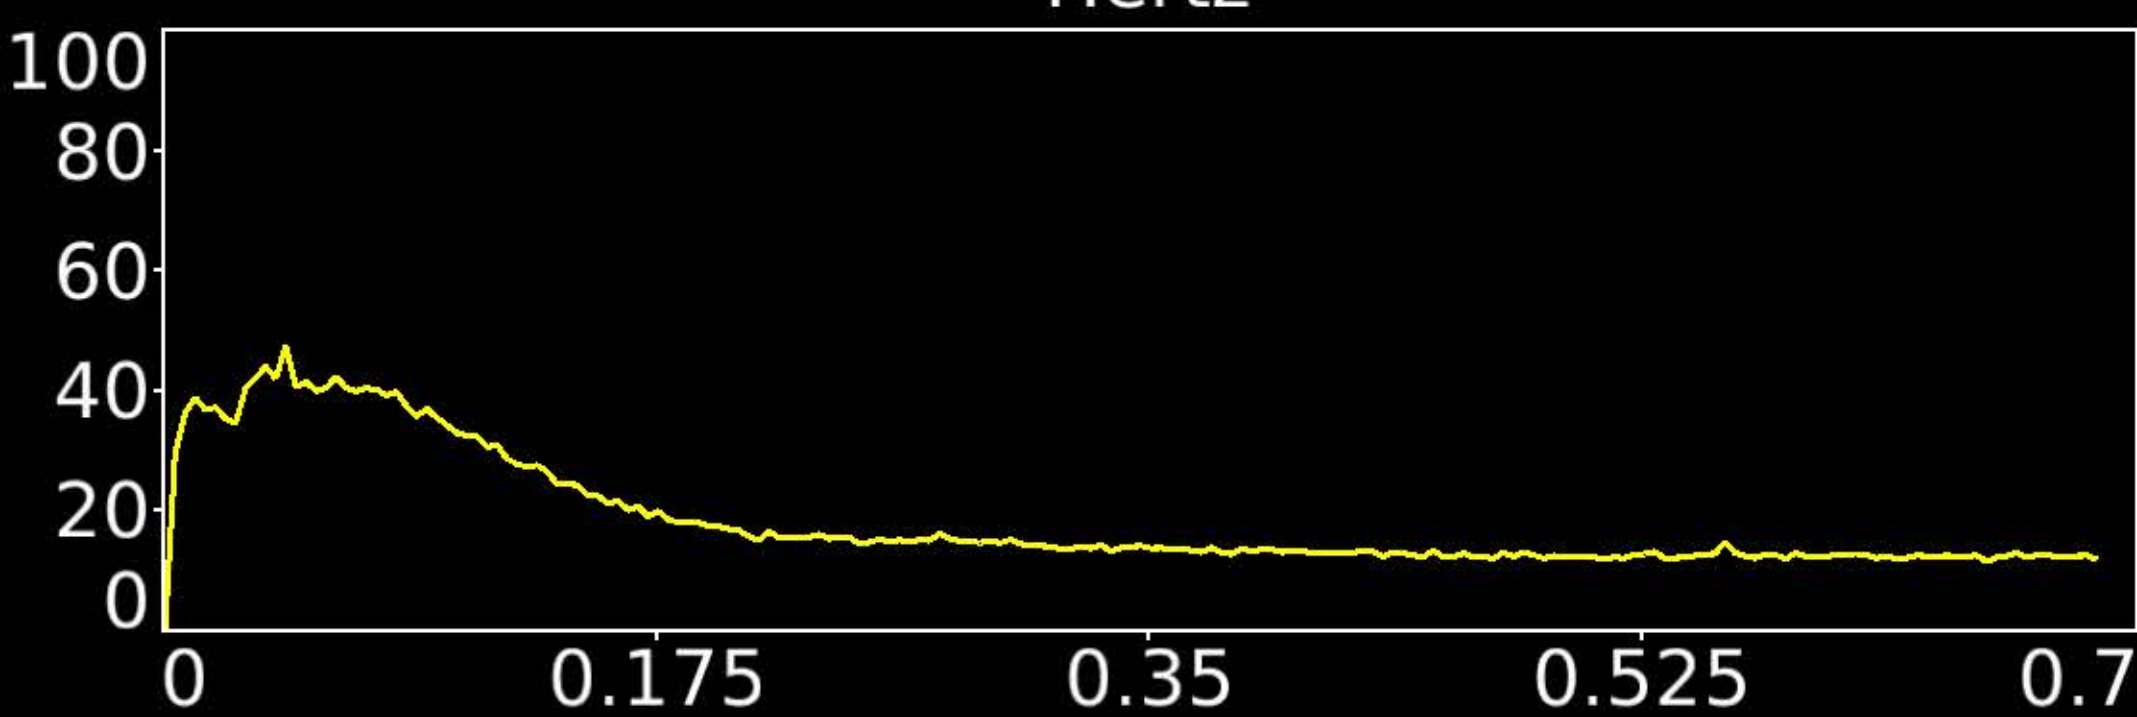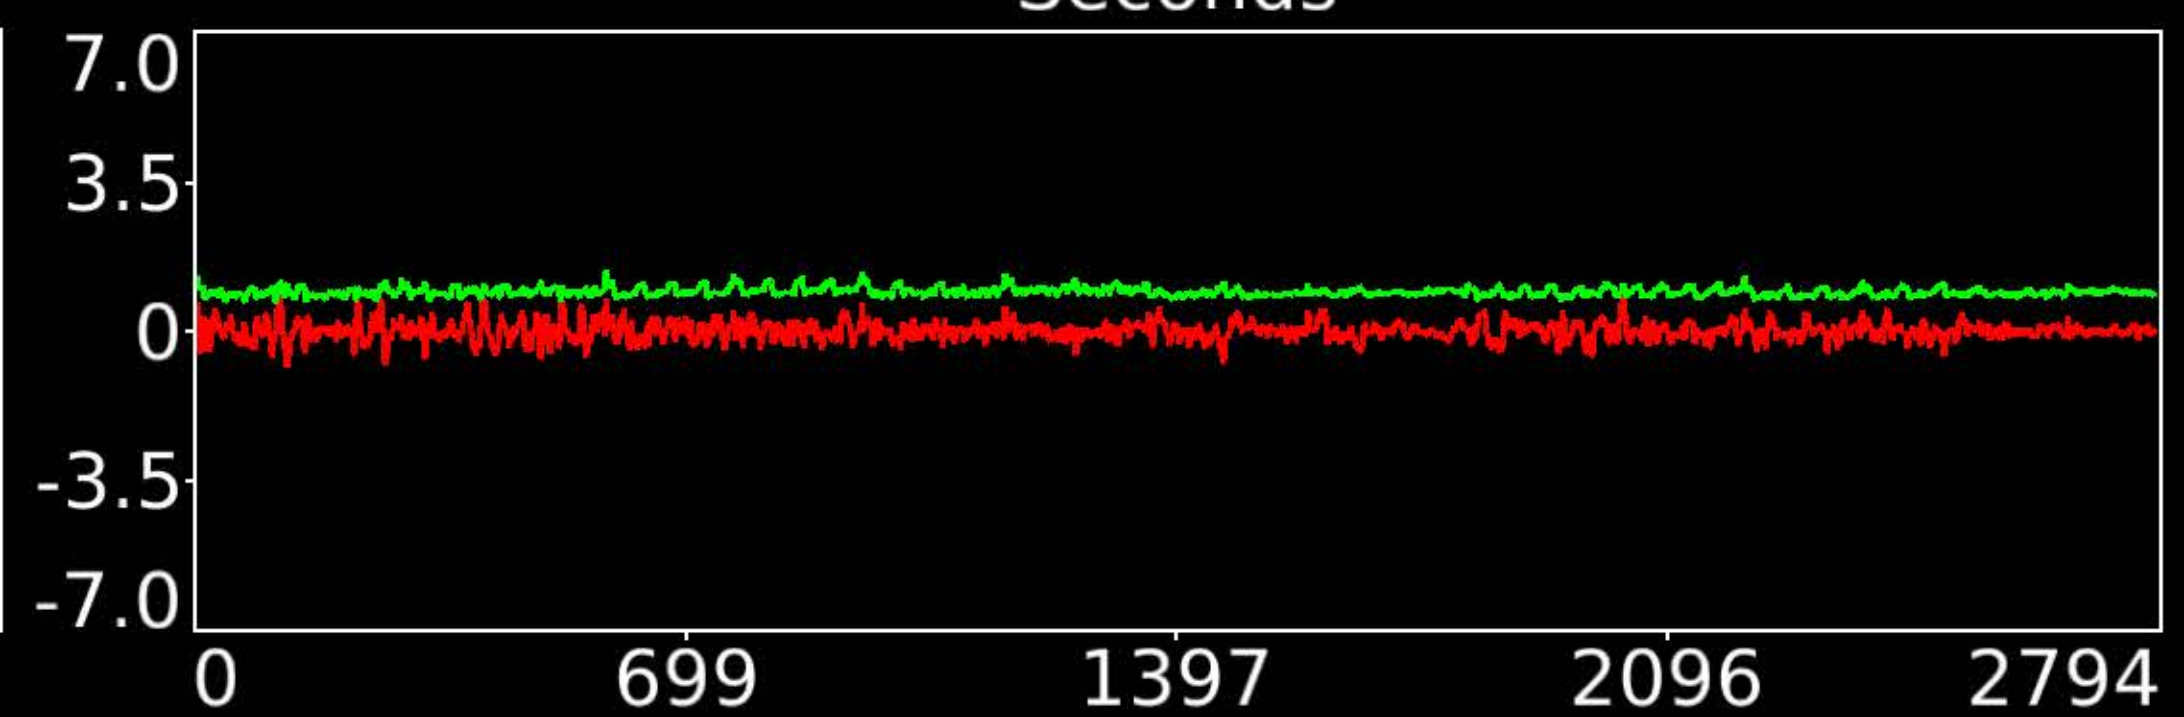

|                                                                                                                      |                            |                            |  |
|----------------------------------------------------------------------------------------------------------------------|----------------------------|----------------------------|--|
| Number & Class: 23 Signal                                                                                            |                            | Name: Unknown Network      |  |
| RVT Correlated: No                                                                                                   | DVARS Dip Associated: No   | Cross-Subject Variable: No |  |
| Single Subject: No                                                                                                   | % Variance Explained: 1.62 | Globality Index: 0.49      |  |
| Task Component: No                                                                                                   | Rest Component: 12         | Task Modulated: No         |  |
| Rationale: Spatial map includes positive and negative patches that respect known RSNs (e.g. Fronto-Parietal Network) |                            |                            |  |



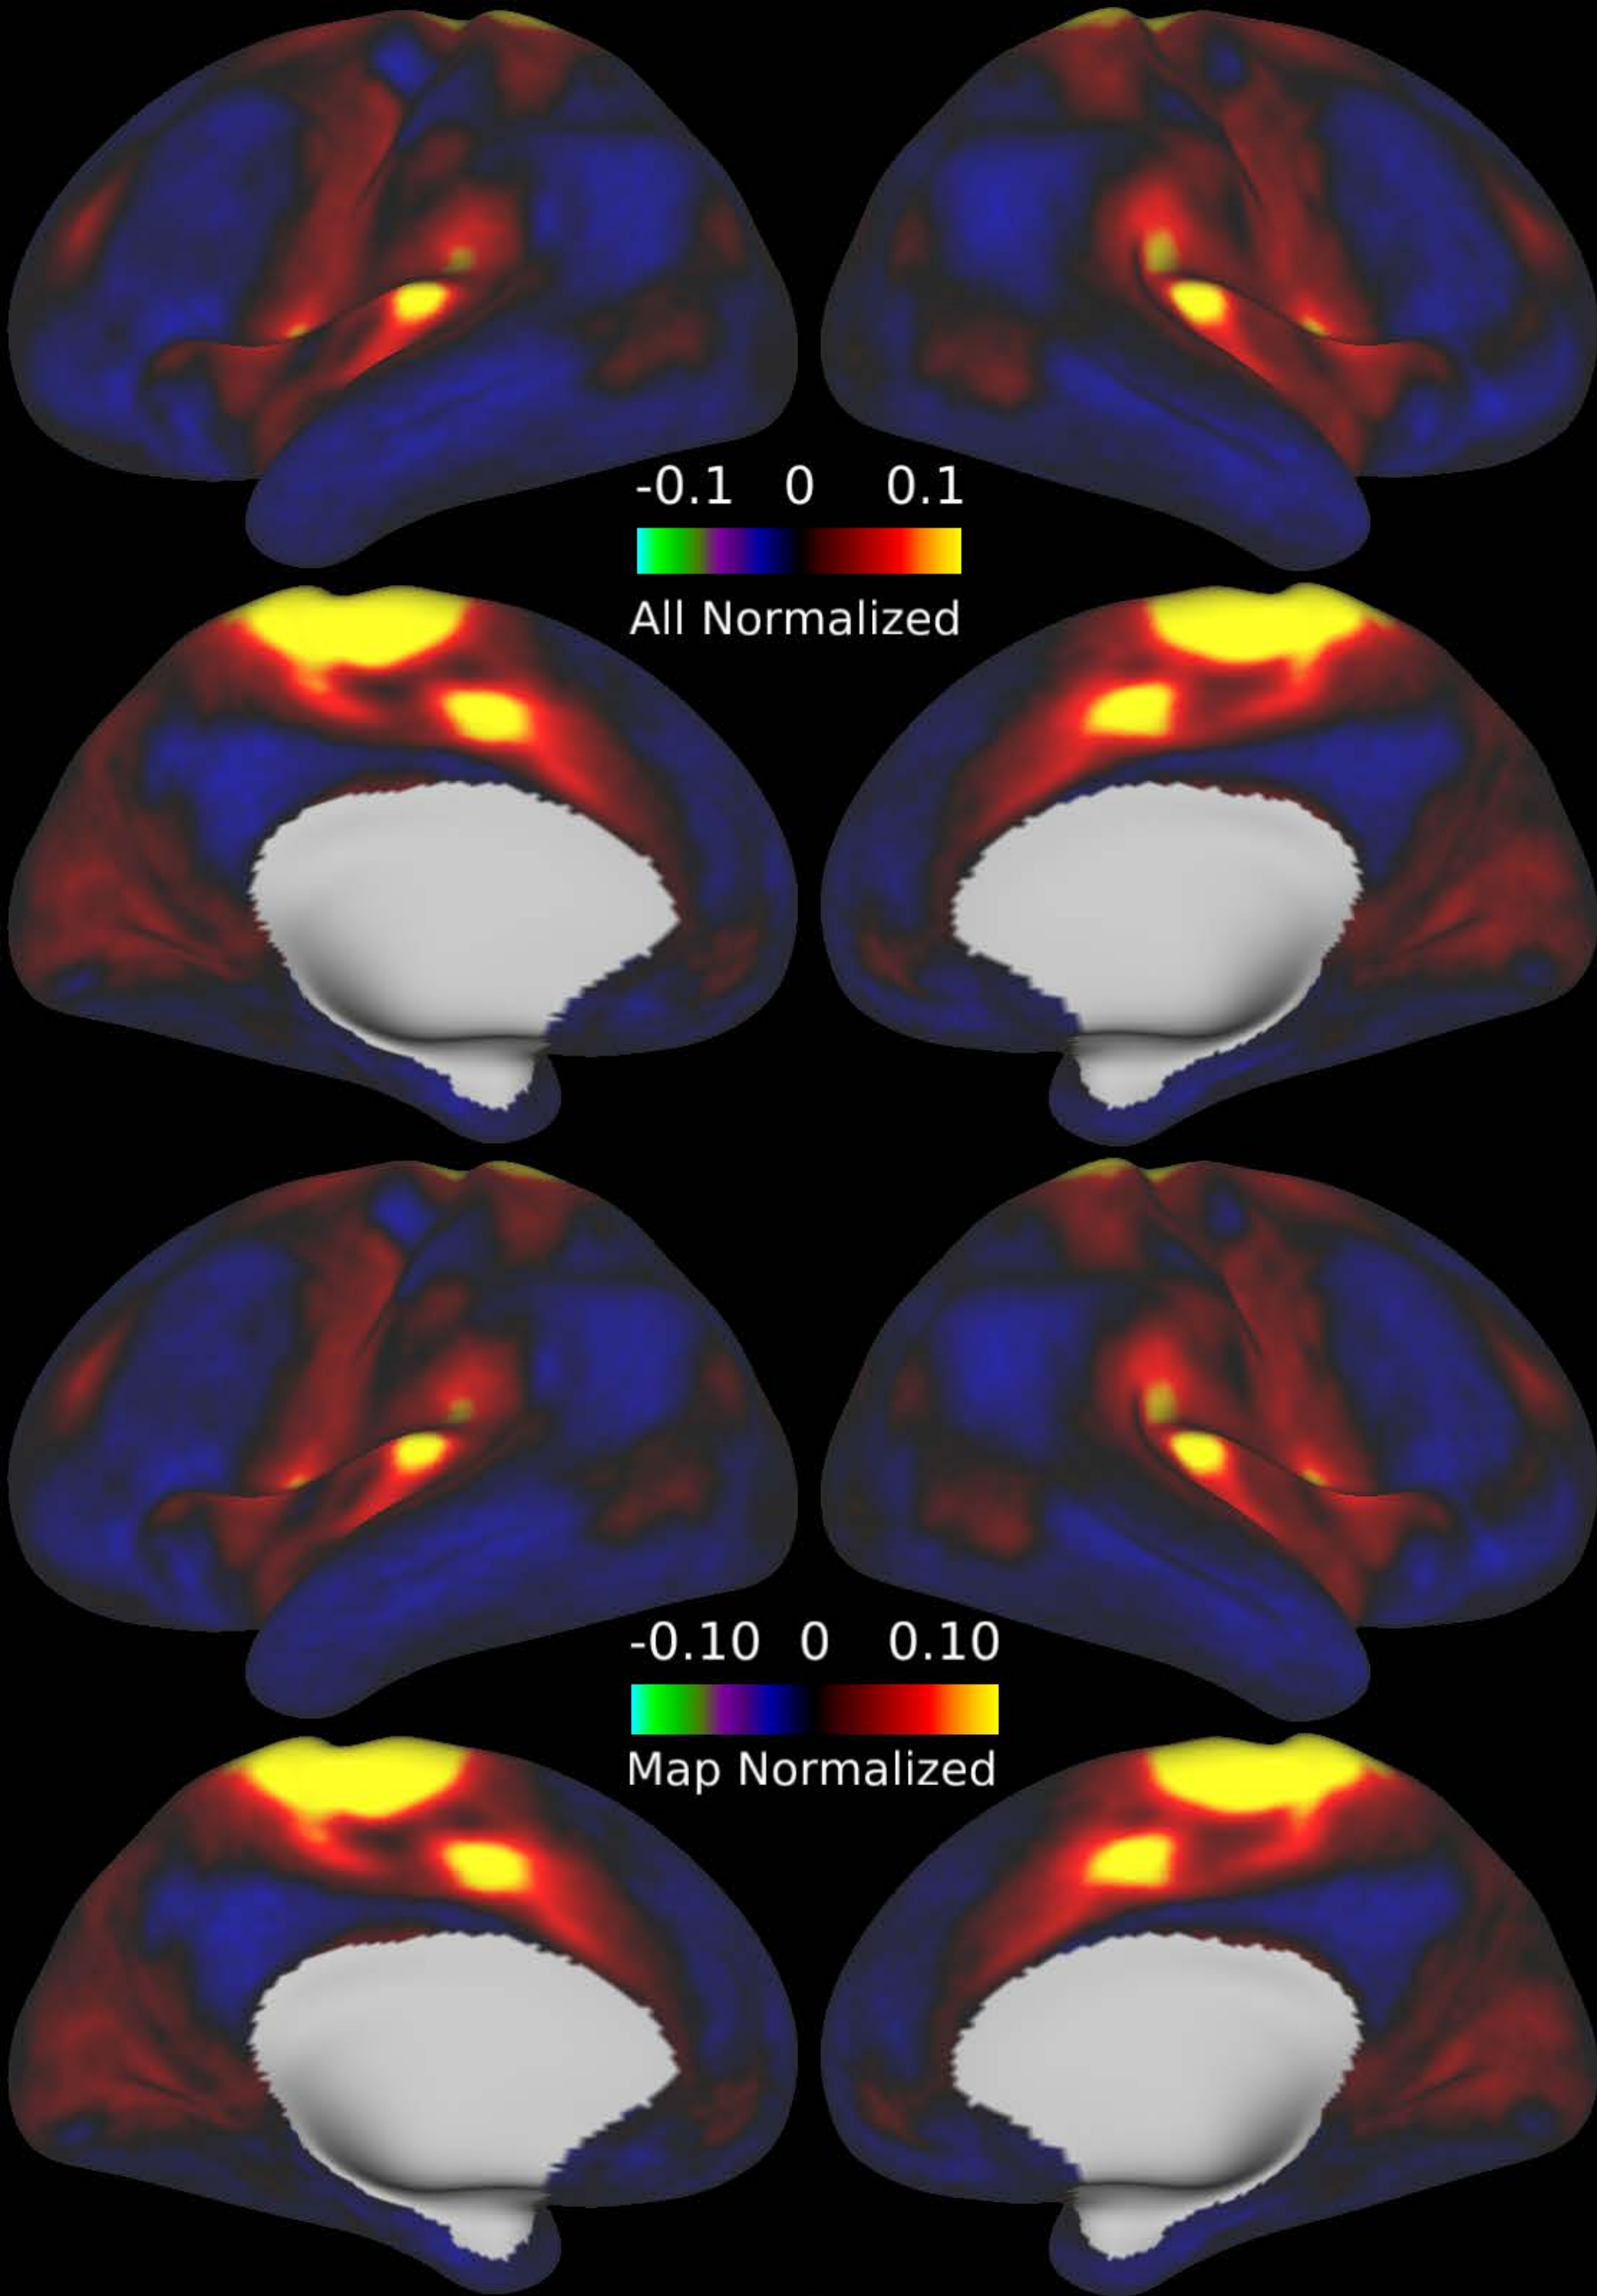

Hertz

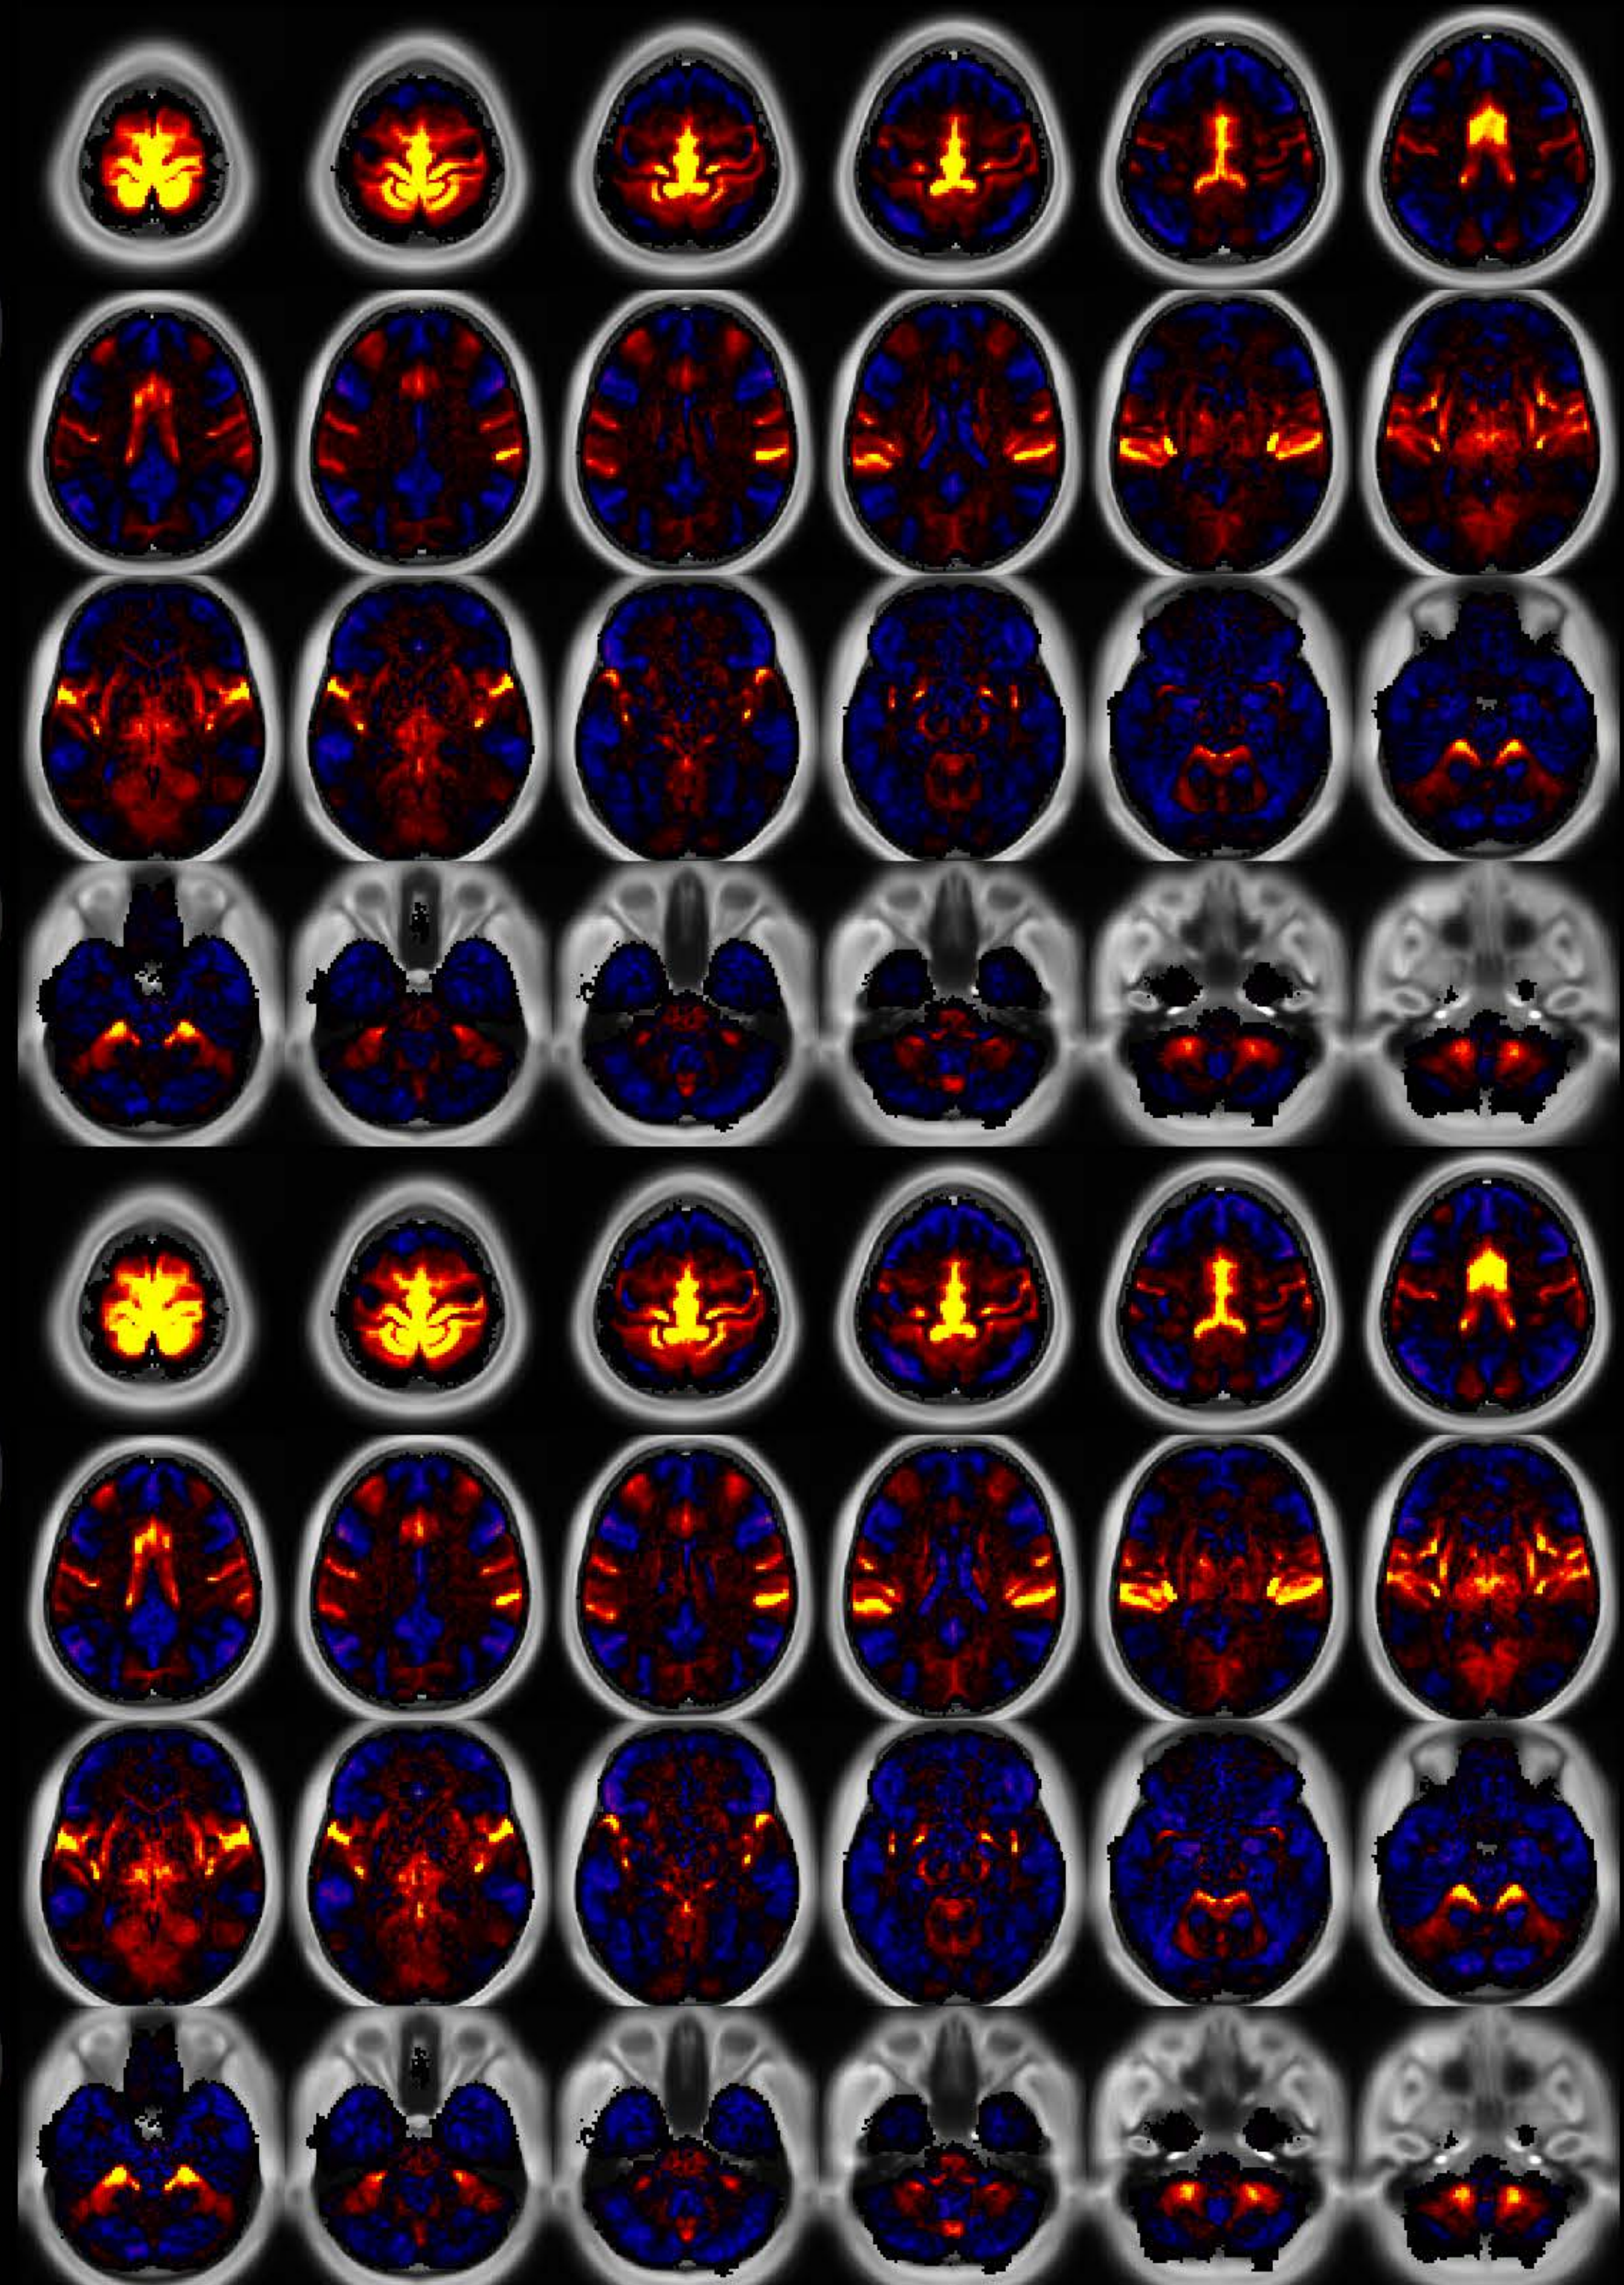

Seconds

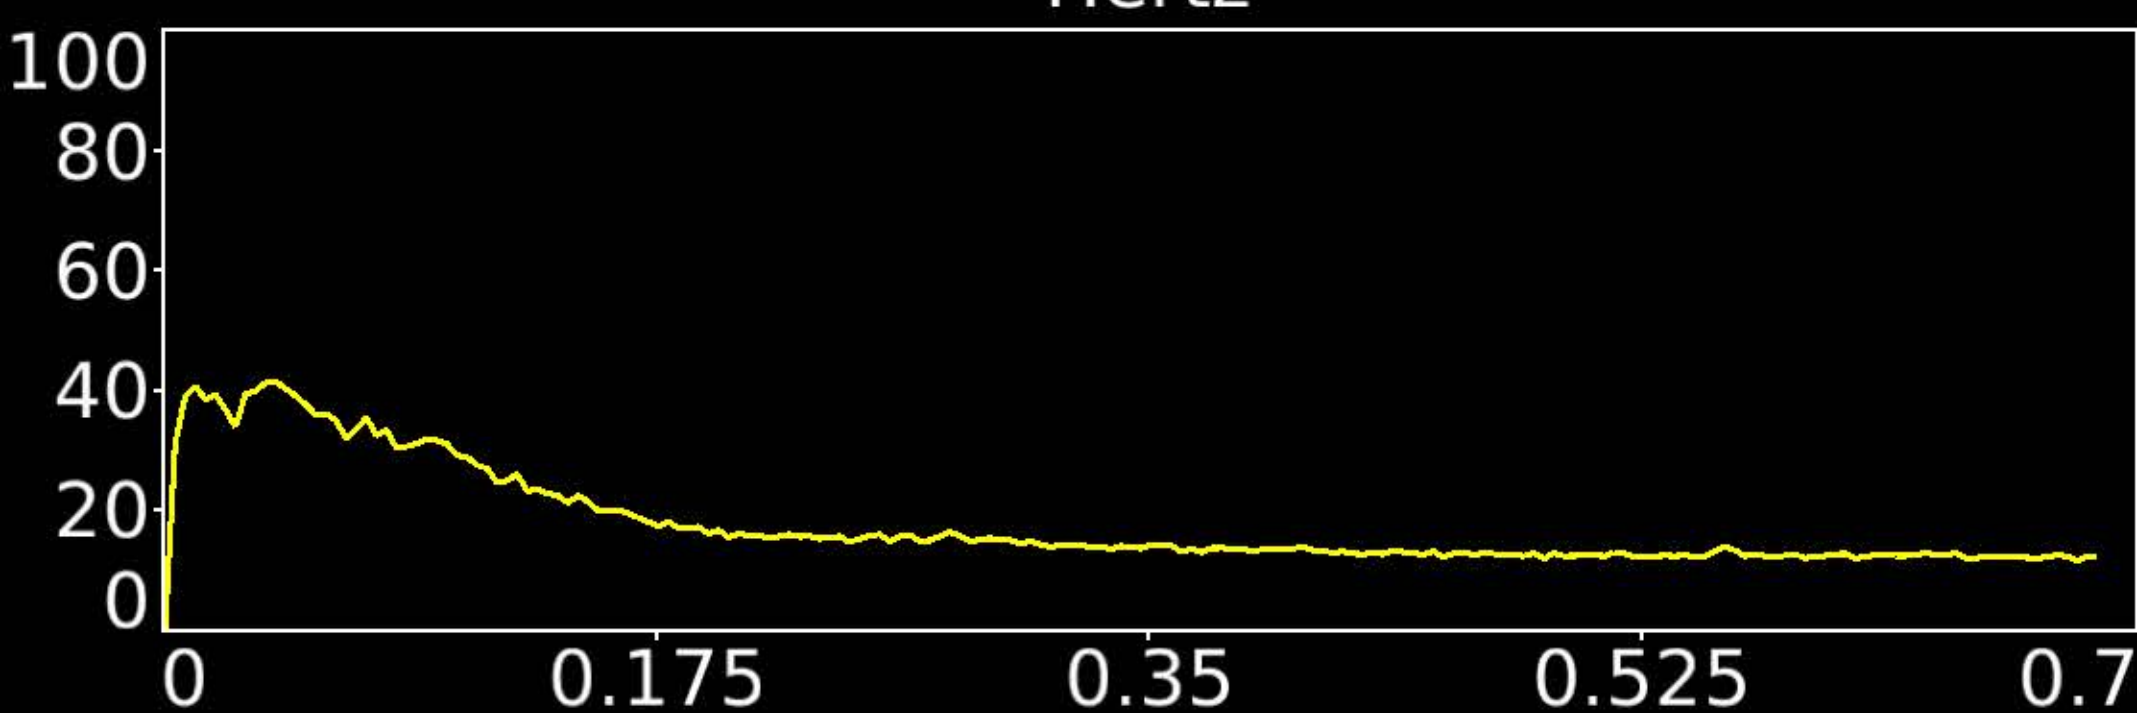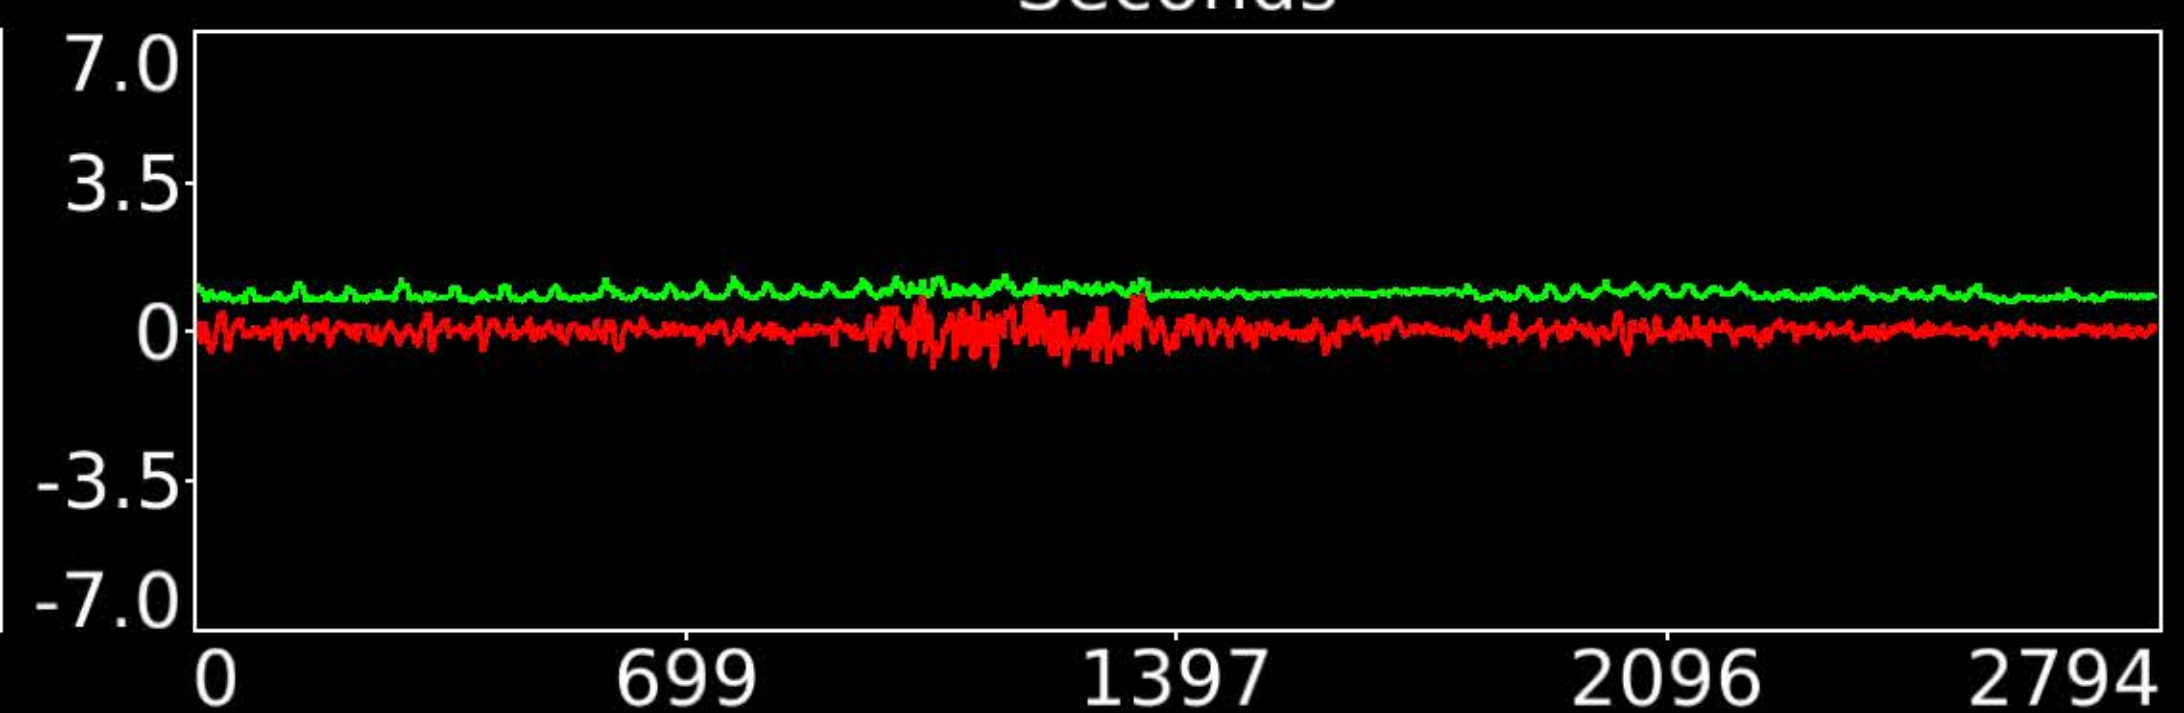

|                           |                            |                             |  |
|---------------------------|----------------------------|-----------------------------|--|
| Number & Class: 24 Signal |                            | Name: Feet Motor Network    |  |
| RVT Correlated: No        | DVARS Dip Associated: Yes  | Cross-Subject Variable: Yes |  |
| Single Subject: No        | % Variance Explained: 1.61 | Globality Index: 0.02       |  |
| Task Component: 19        | Rest Component: 48         | Task Modulated: No          |  |

Rationale: Spatial map includes positive and negative patches that respect known somatotopic sensori-motor organization (Feet)



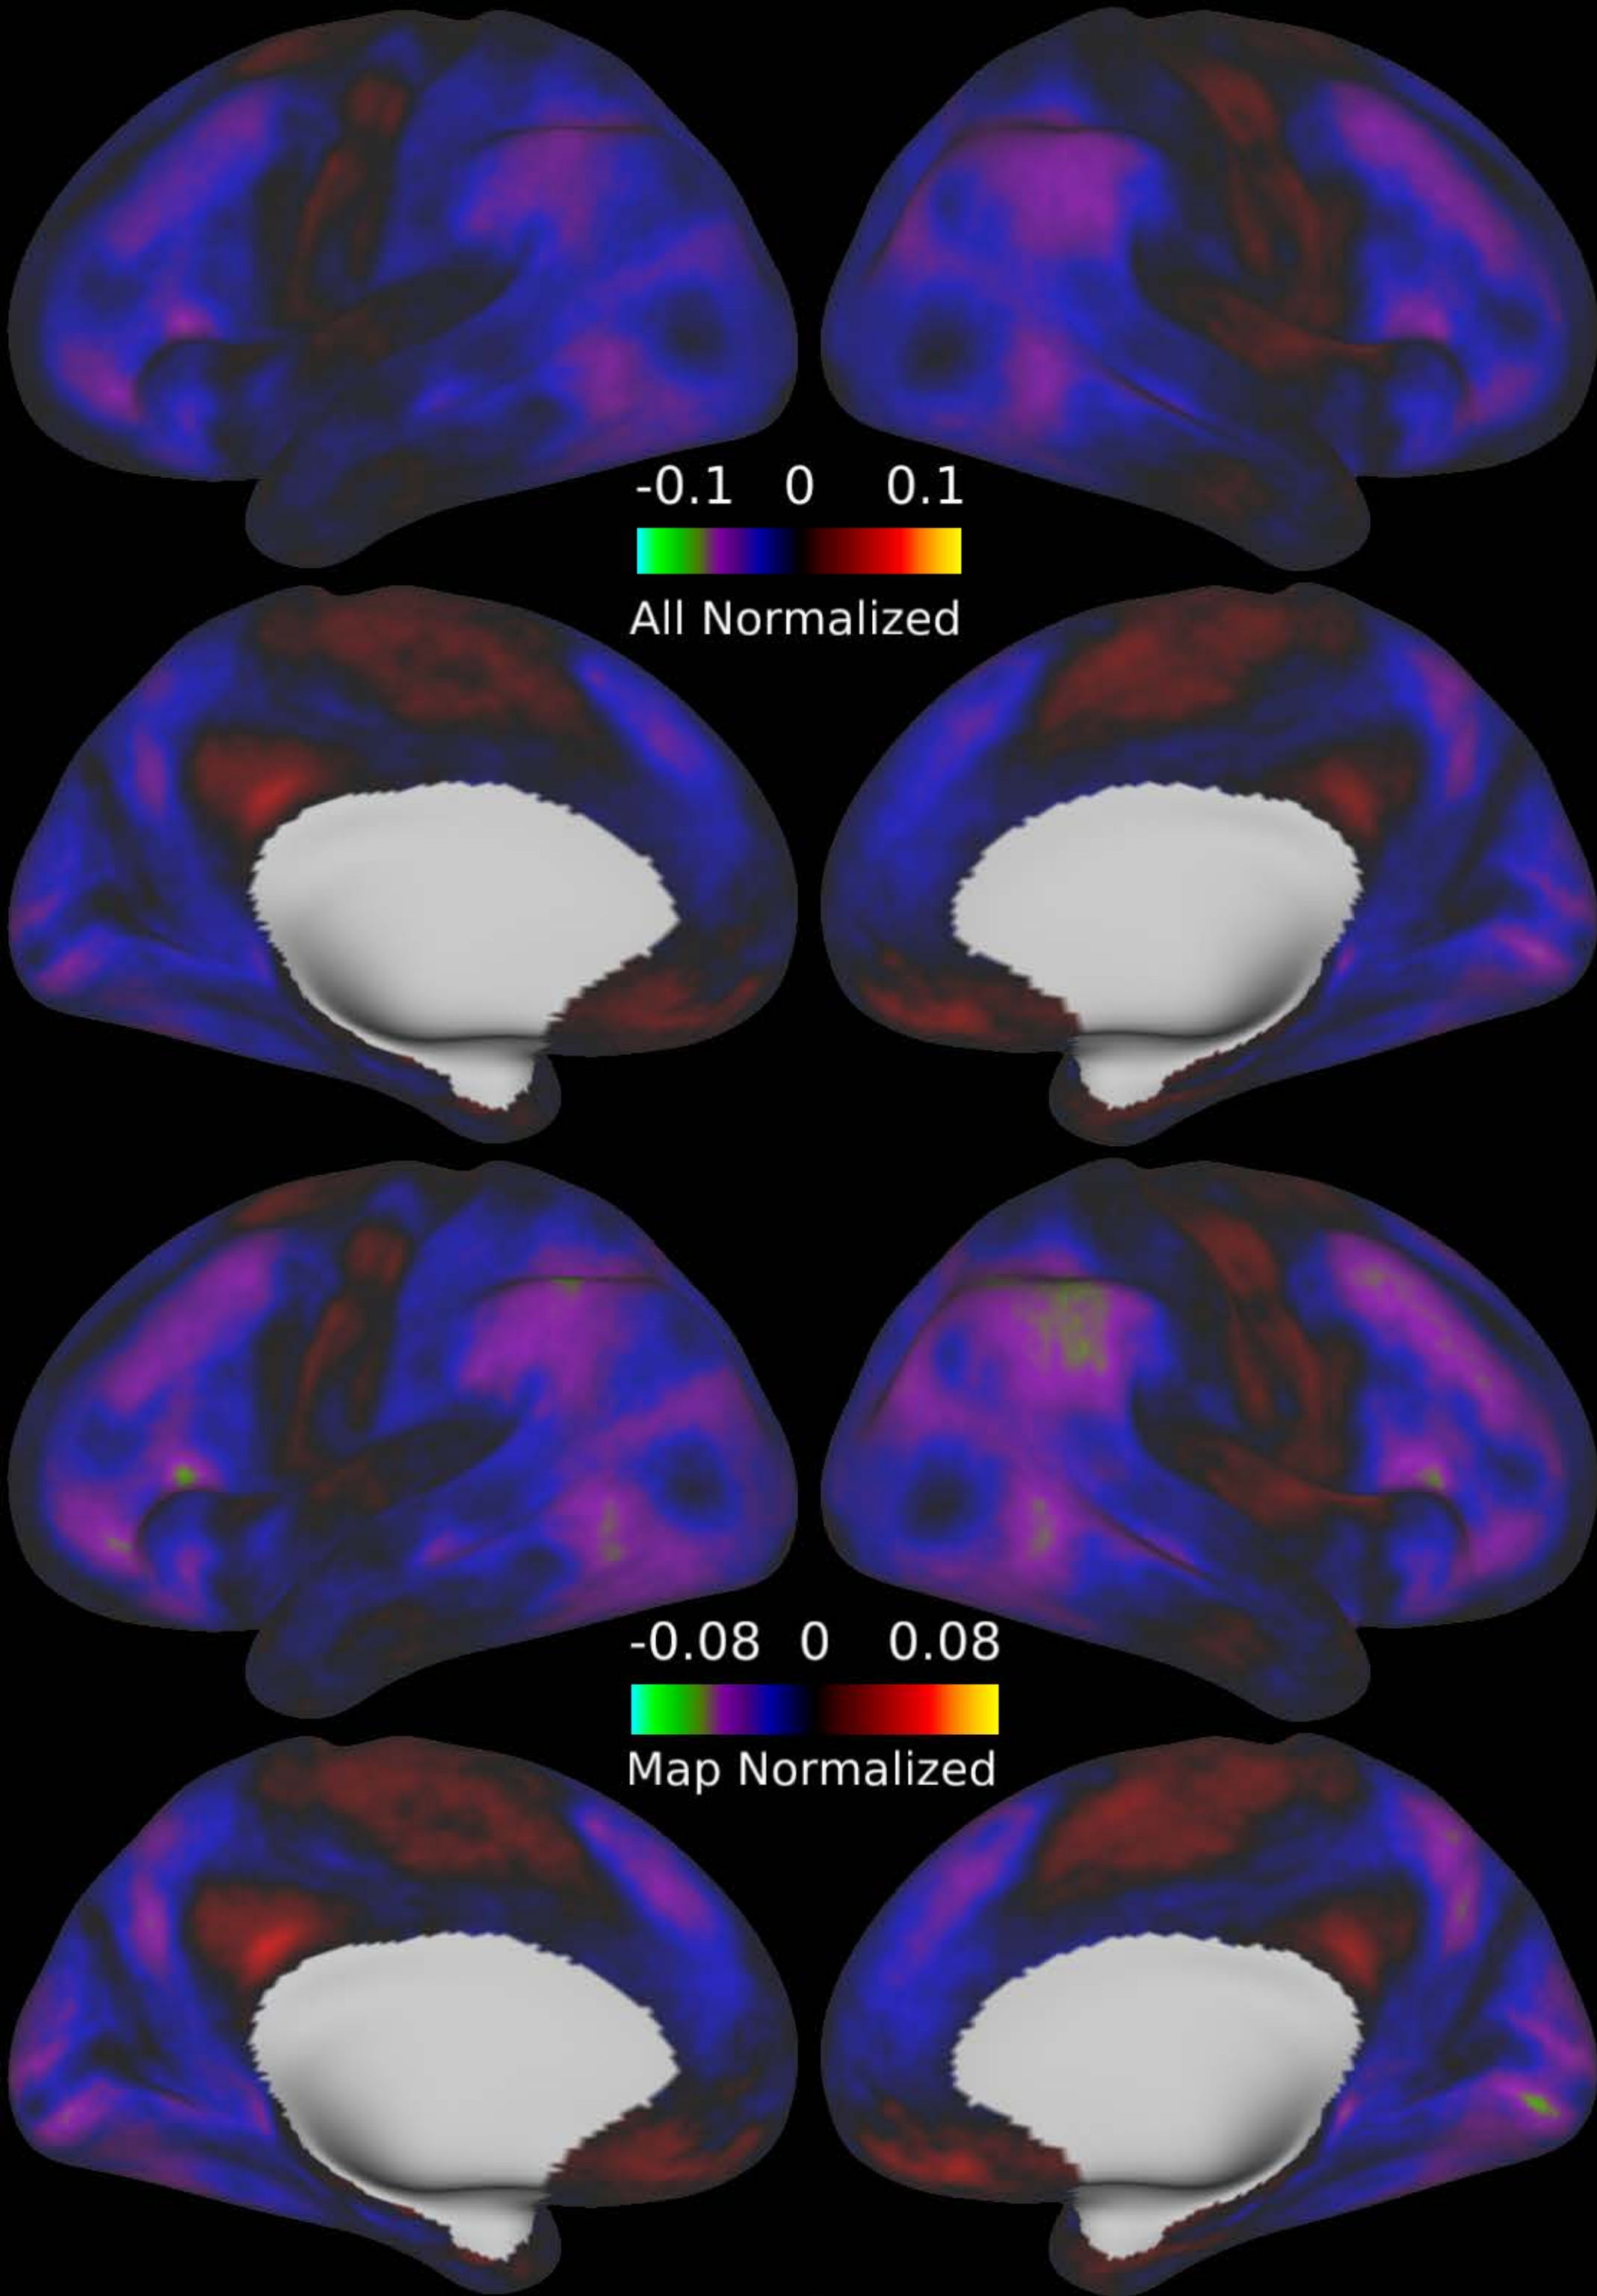

Hertz

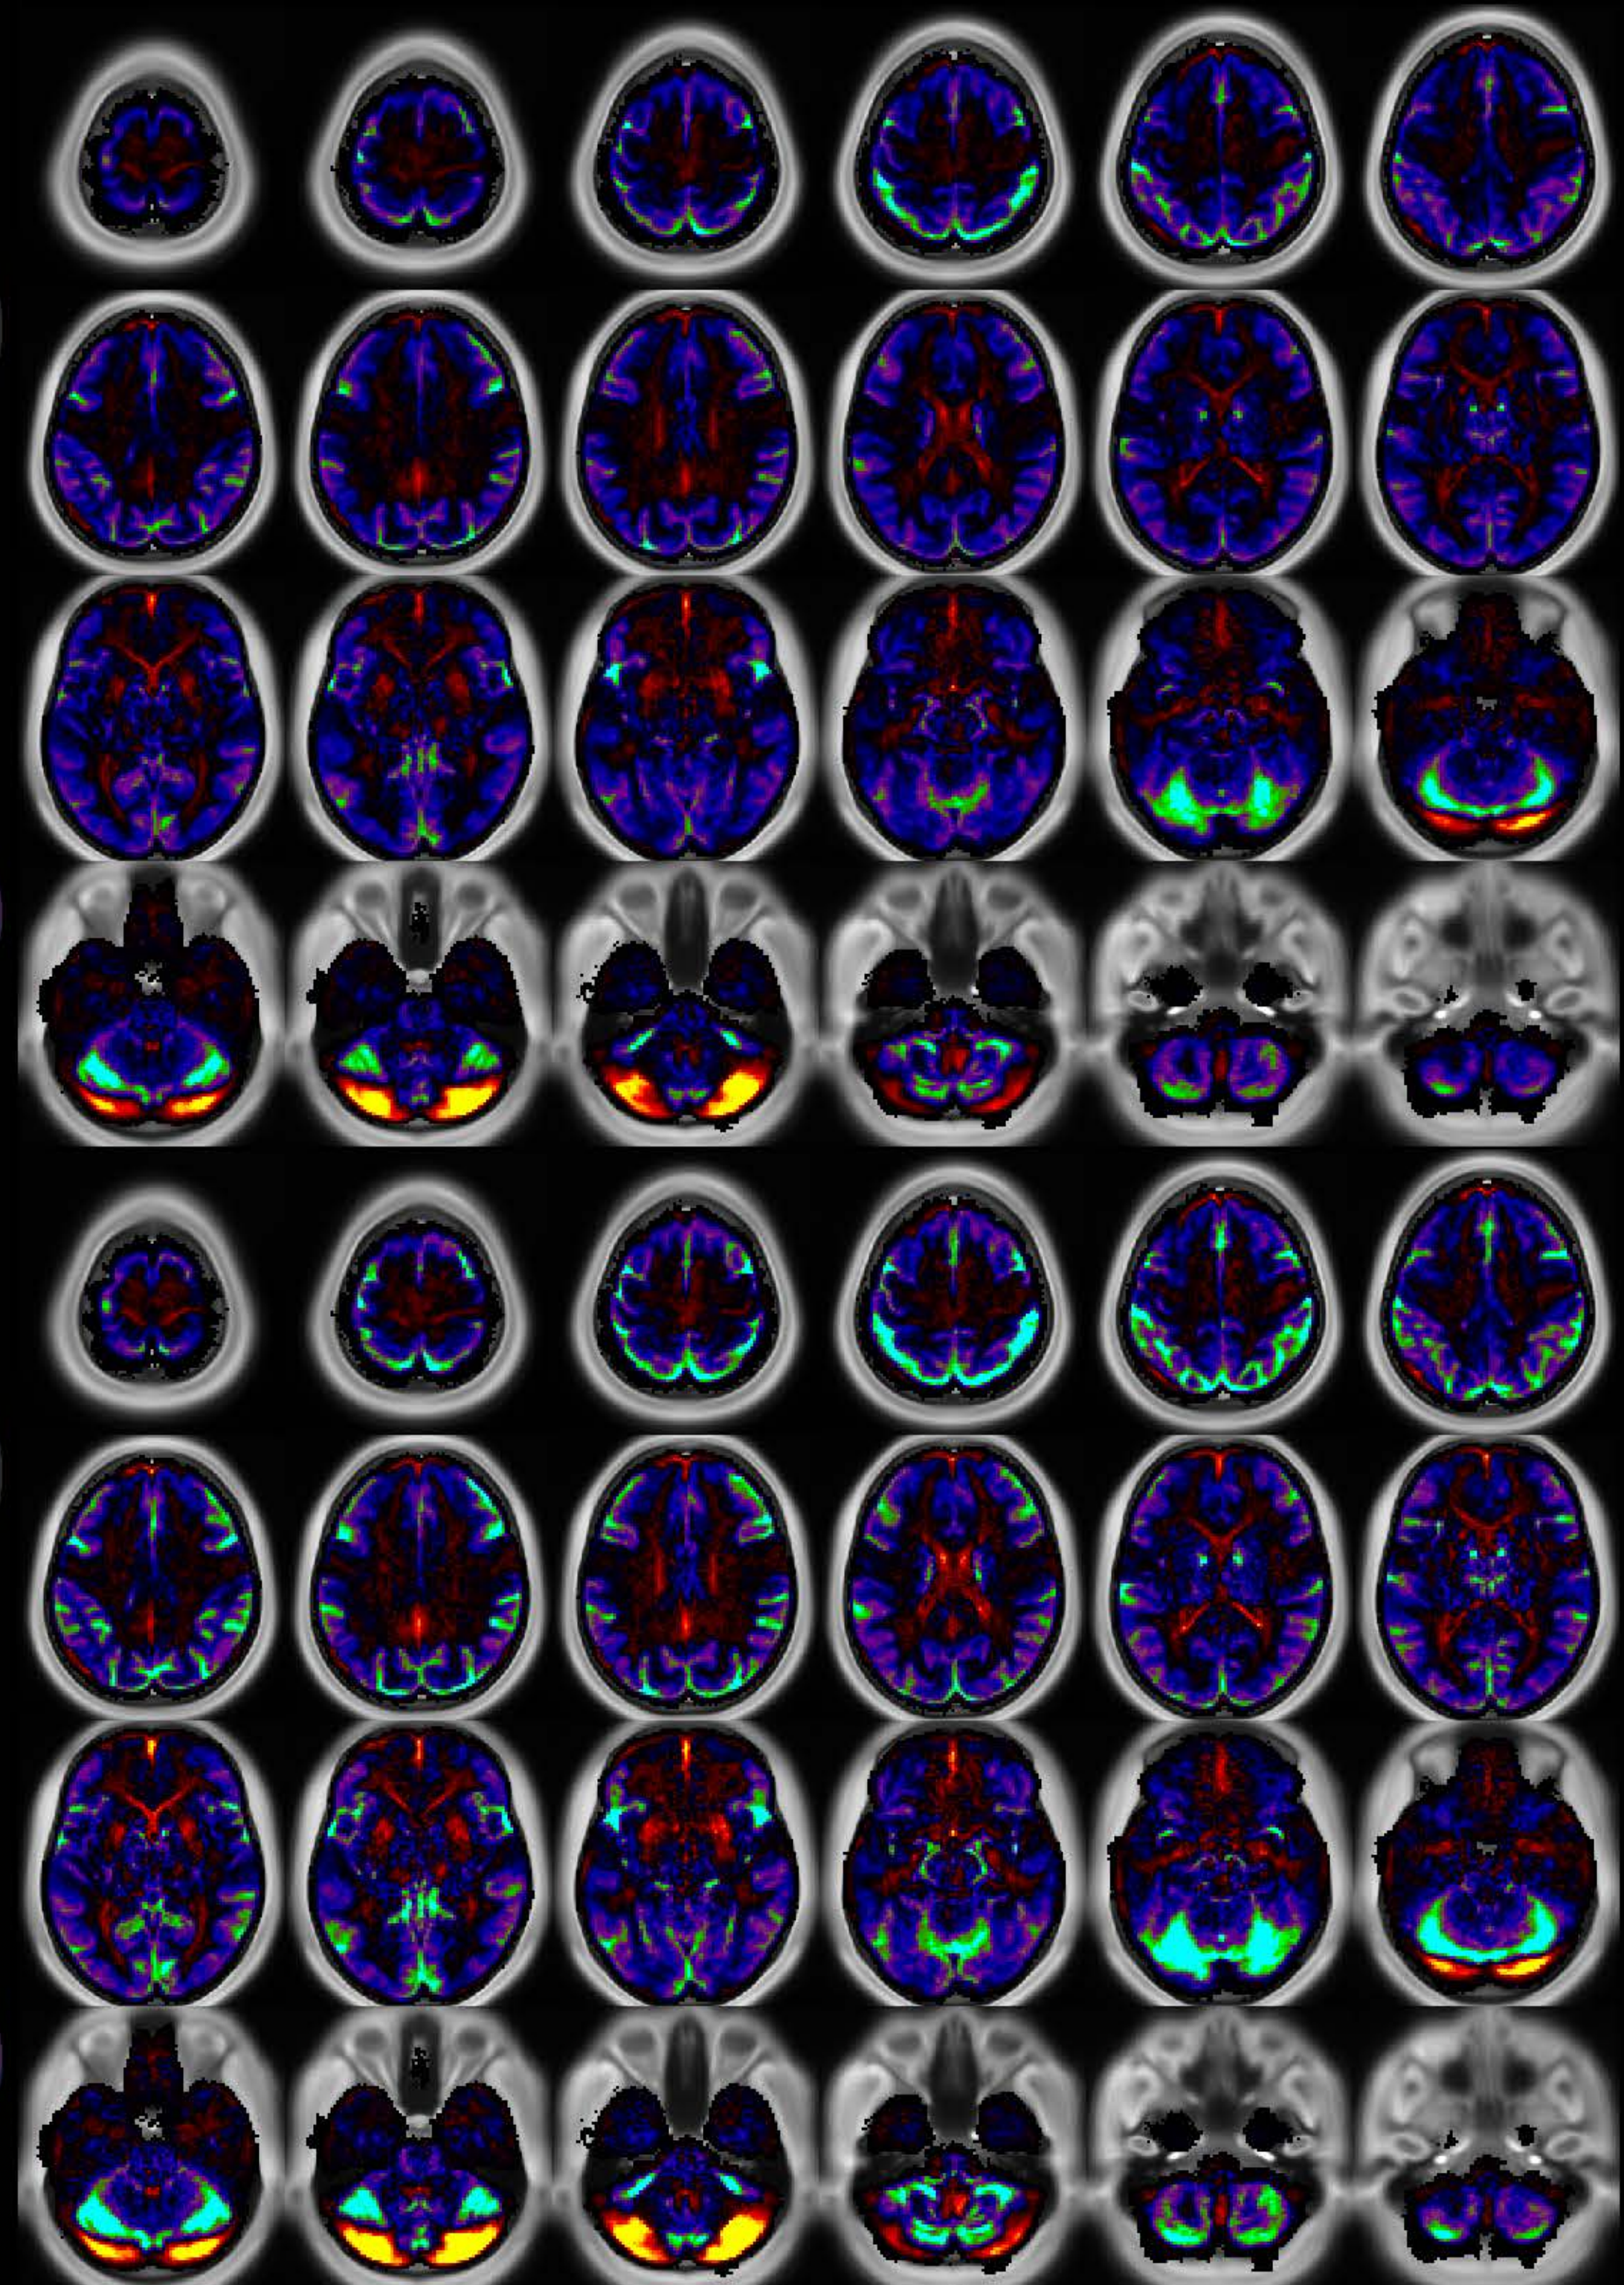

Seconds

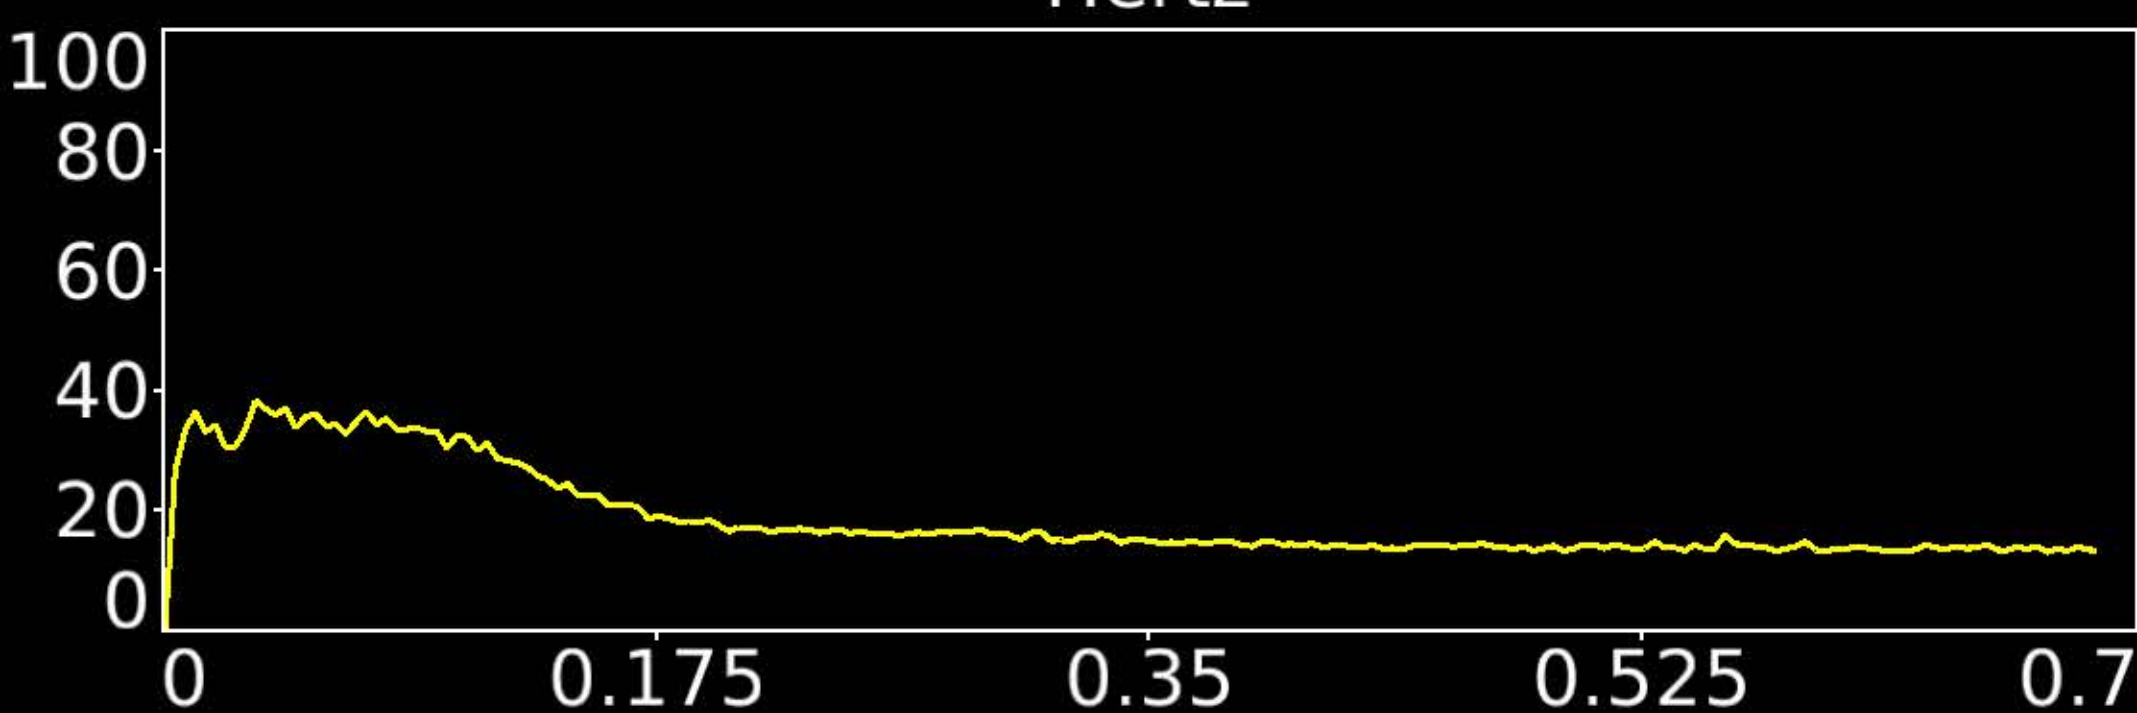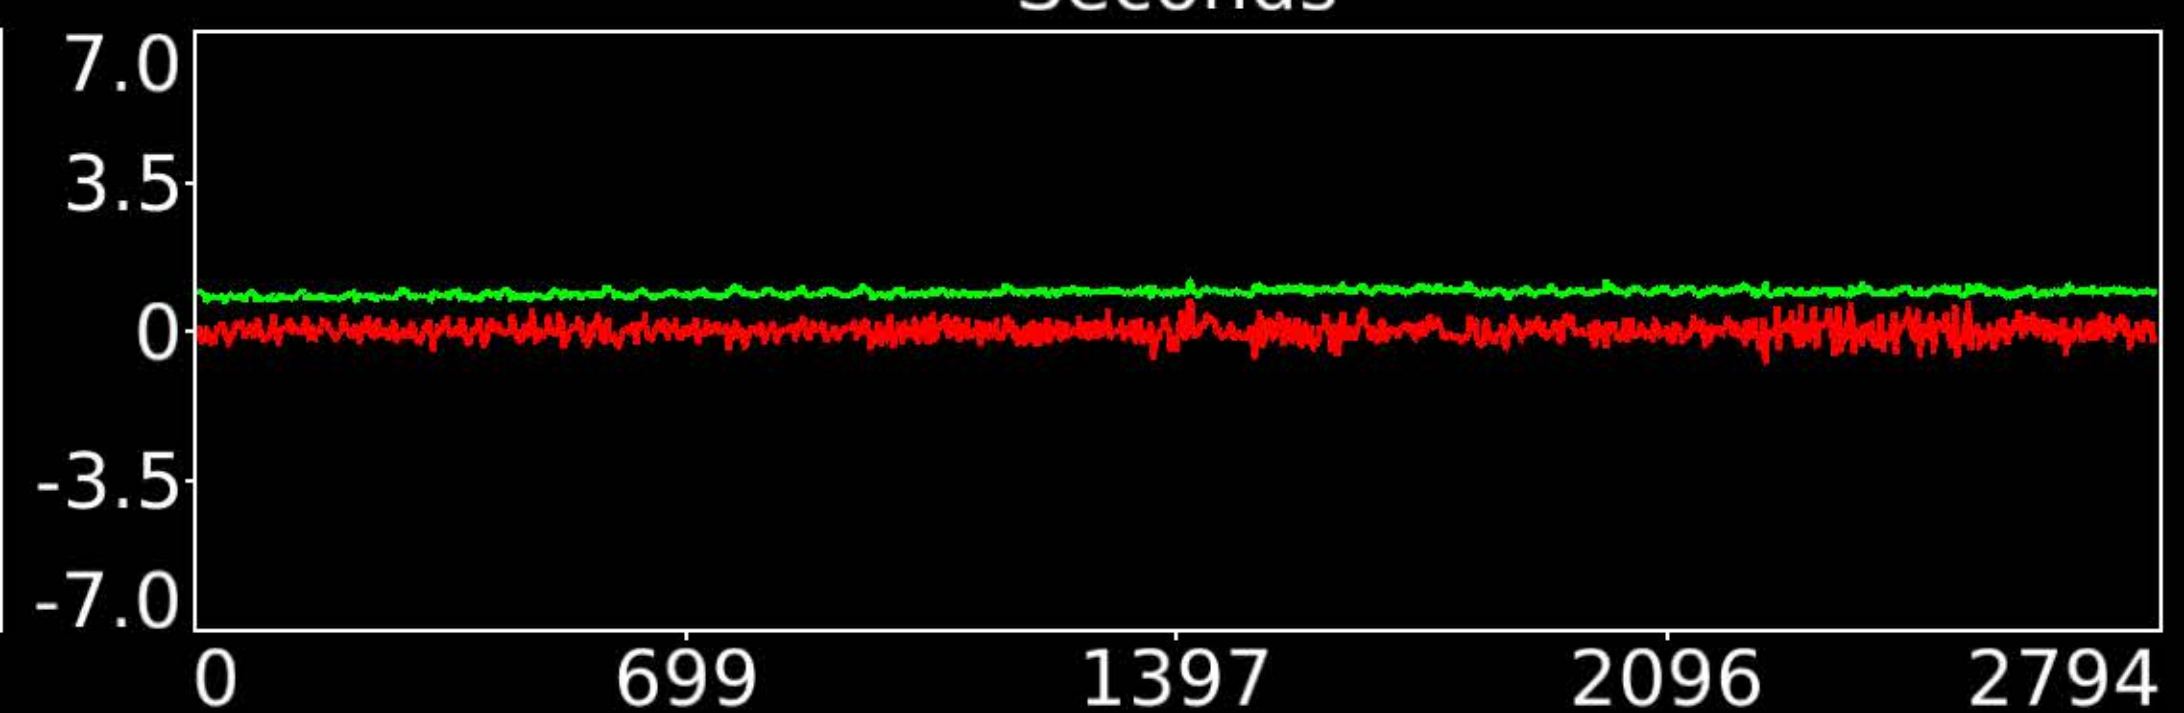

|                           |                            |                             |  |
|---------------------------|----------------------------|-----------------------------|--|
| Number & Class: 25 Signal |                            | Name: Cerebellar Unknown    |  |
| RVT Correlated: No        | DVARS Dip Associated: No   | Cross-Subject Variable: Yes |  |
| Single Subject: No        | % Variance Explained: 1.57 | Globality Index: 1.74       |  |
| Task Component: 35        | Rest Component: No         | Task Modulated: No          |  |

Rationale: Spatial map includes positive and negative patches that respect known RSN boundaries in the cerebellum



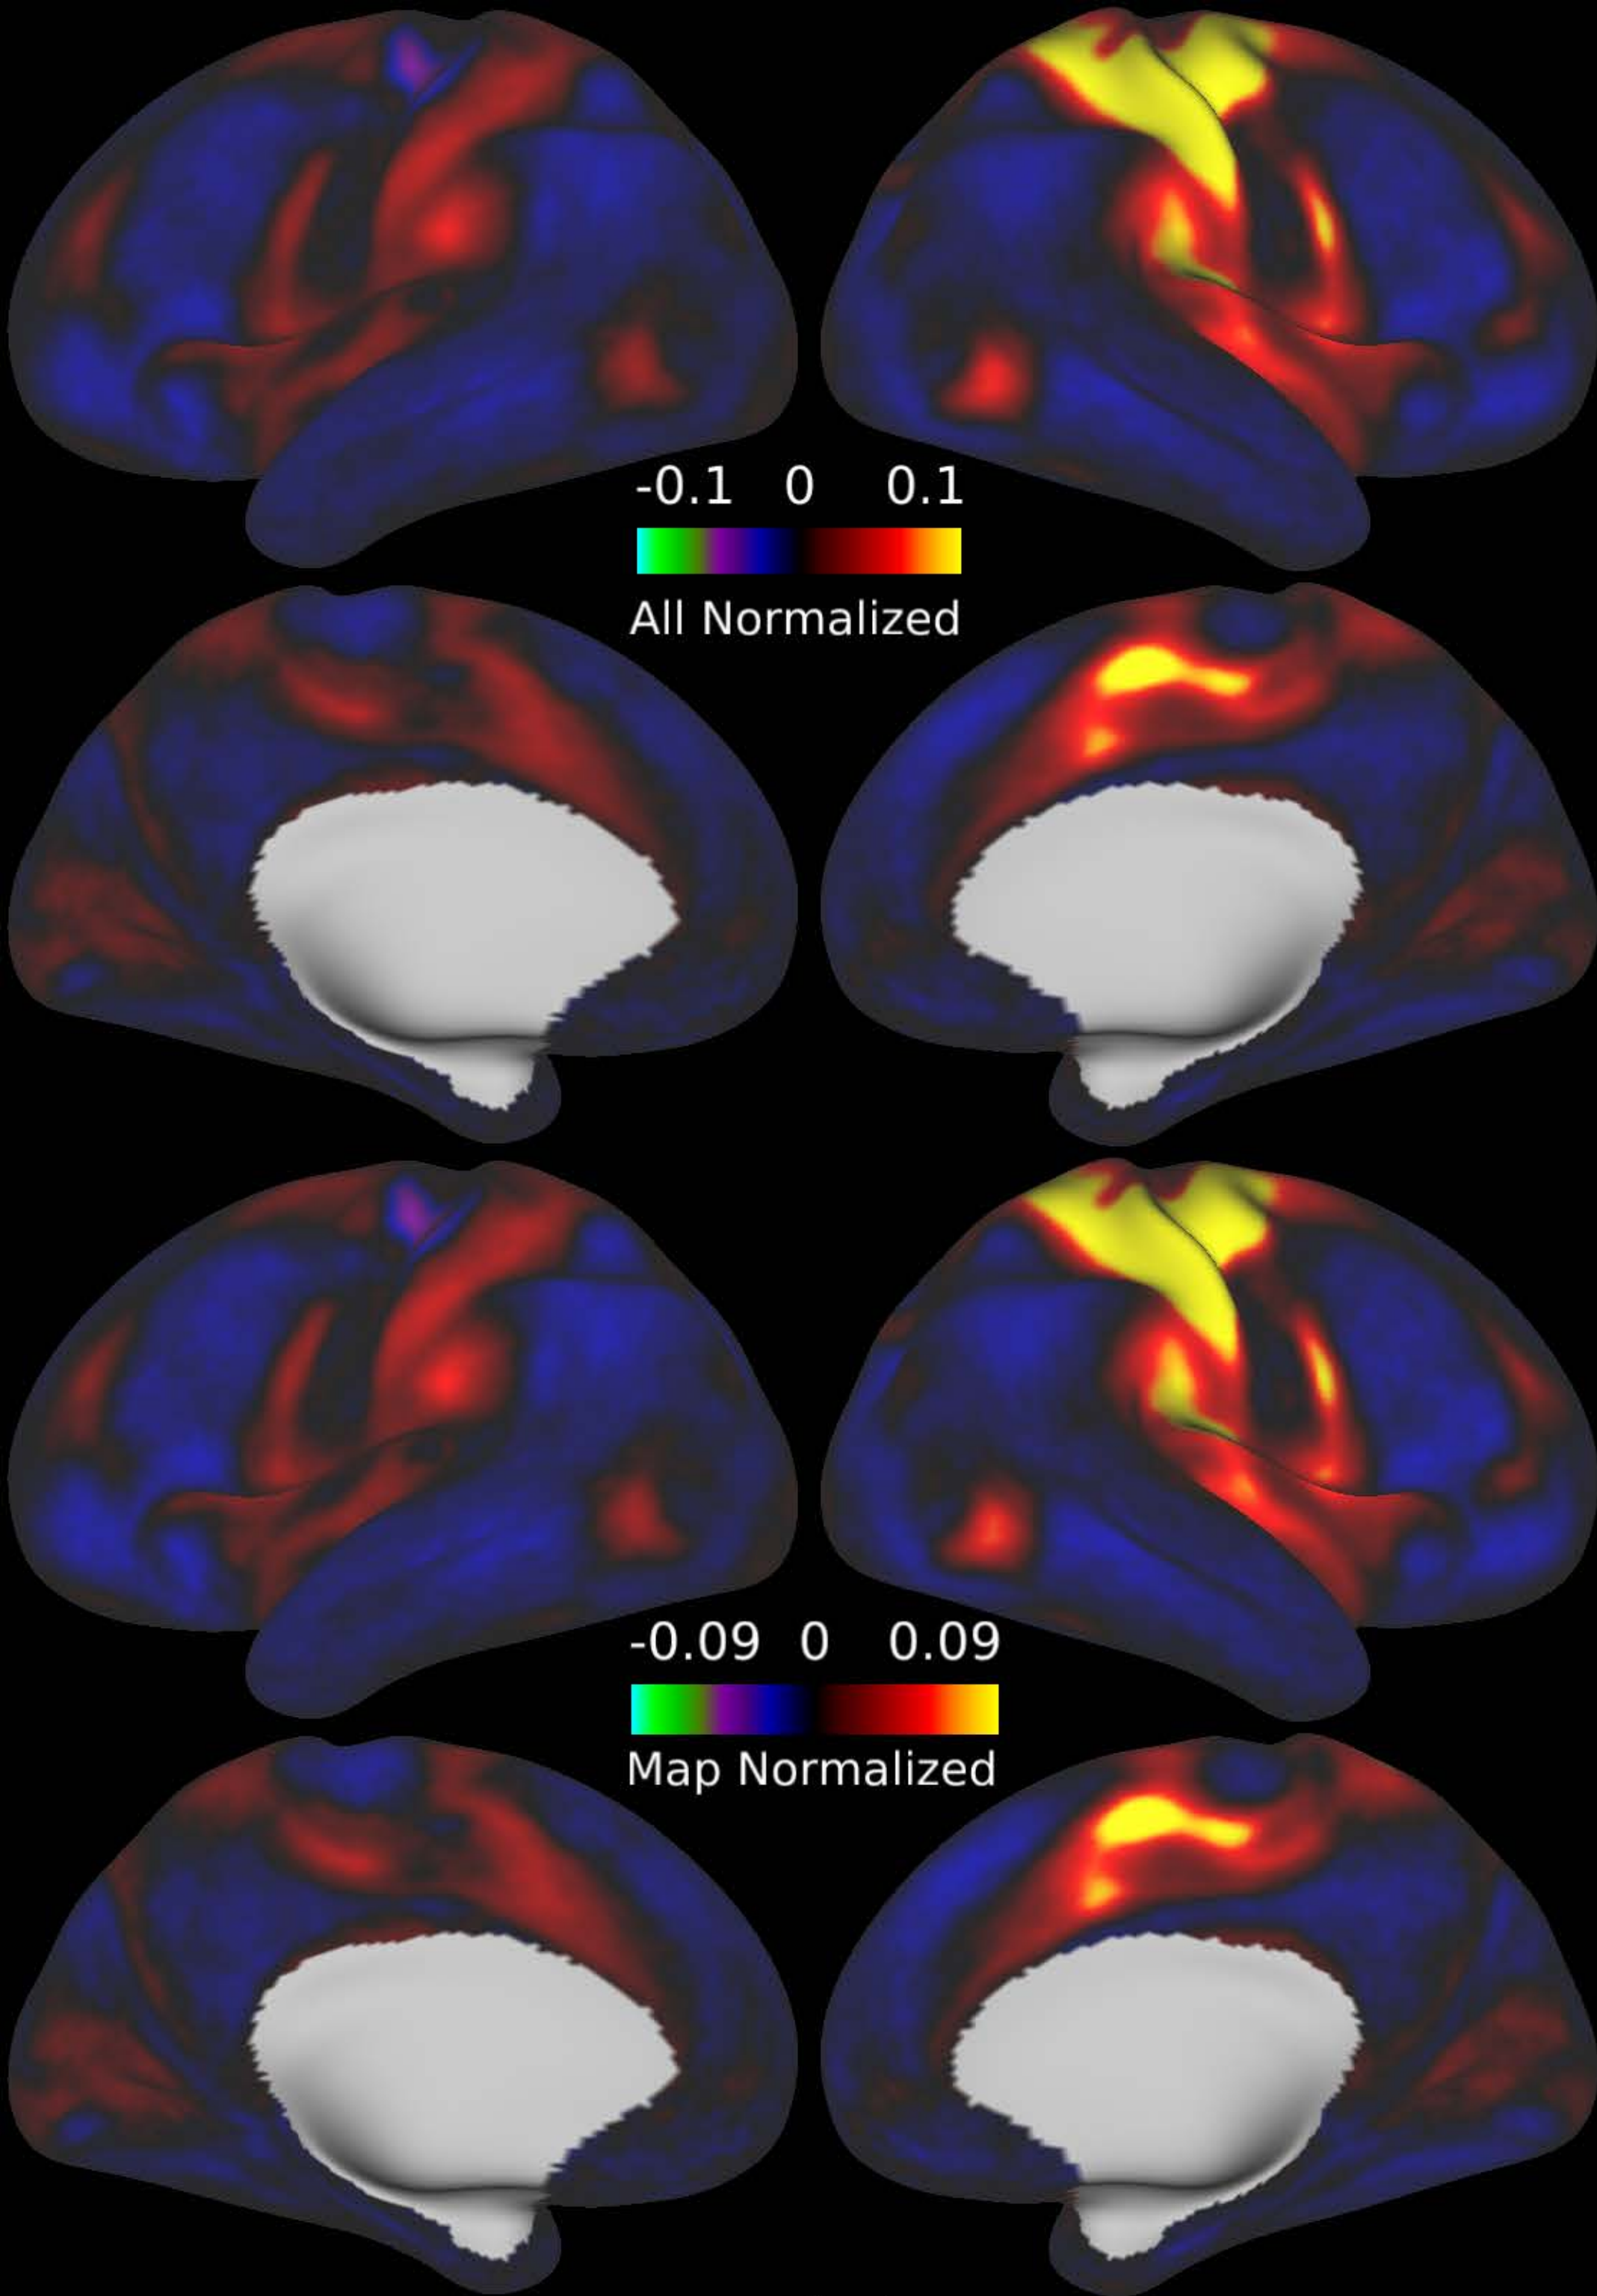

Hertz

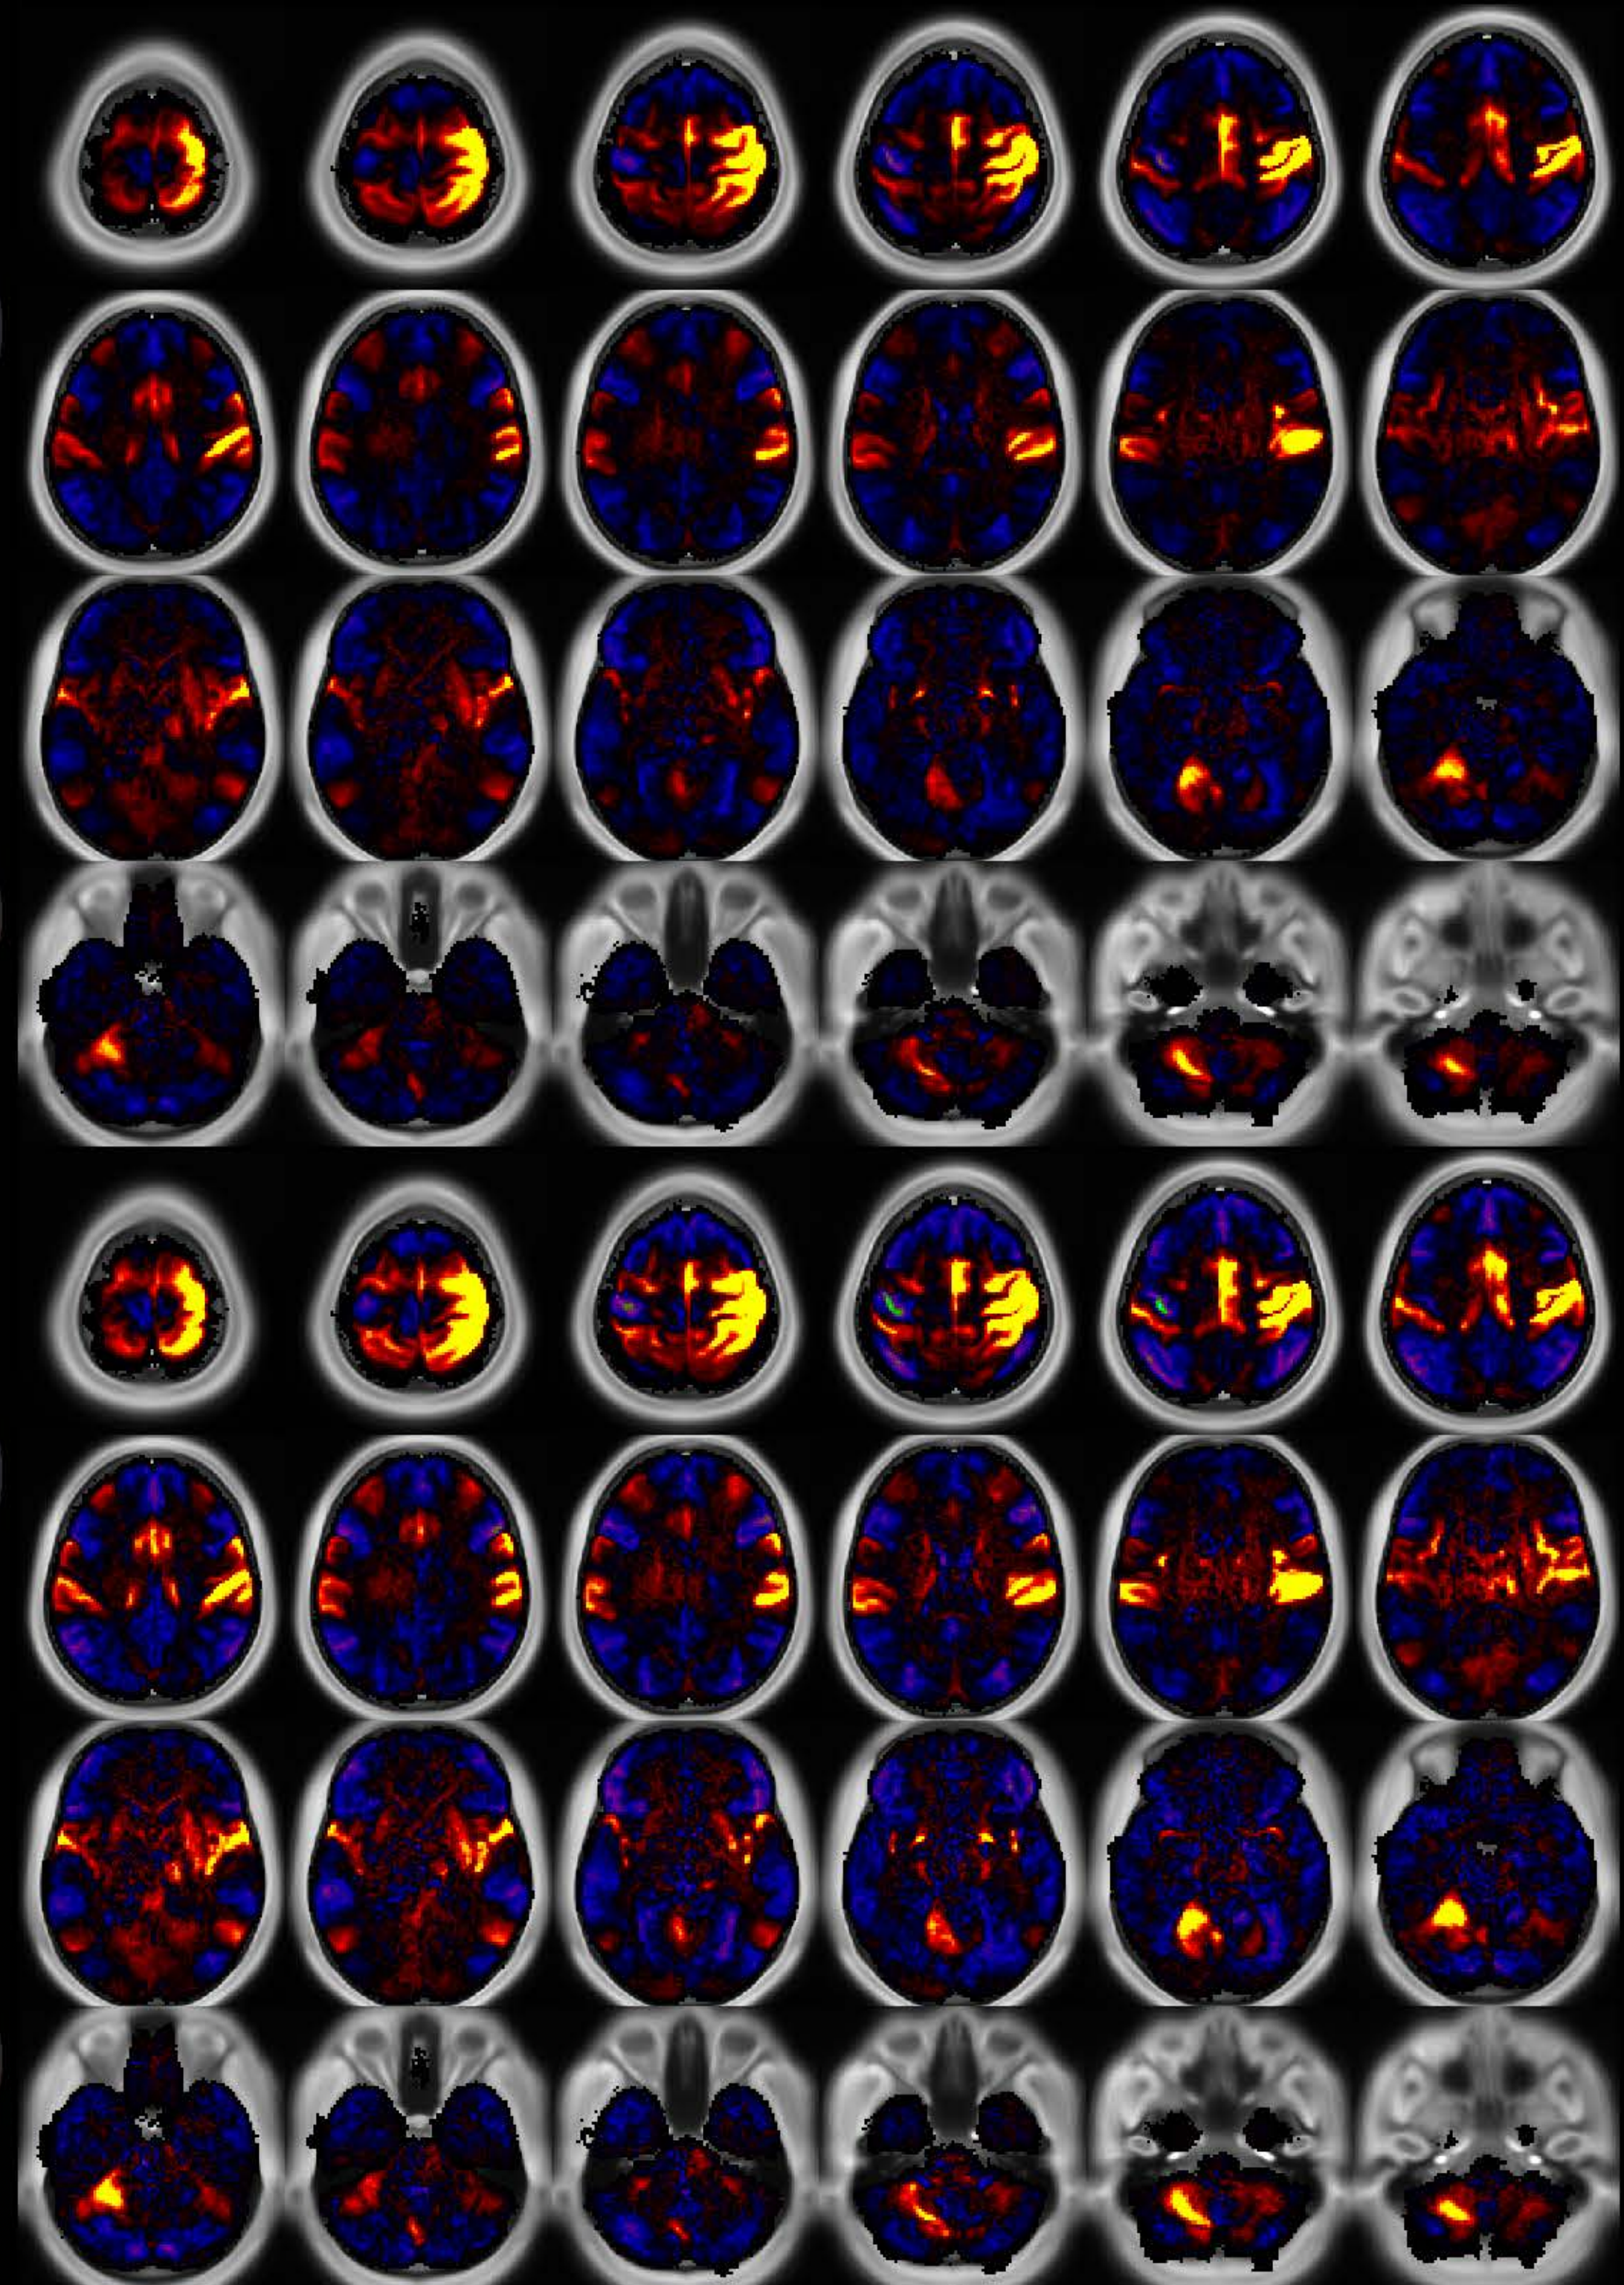

Seconds

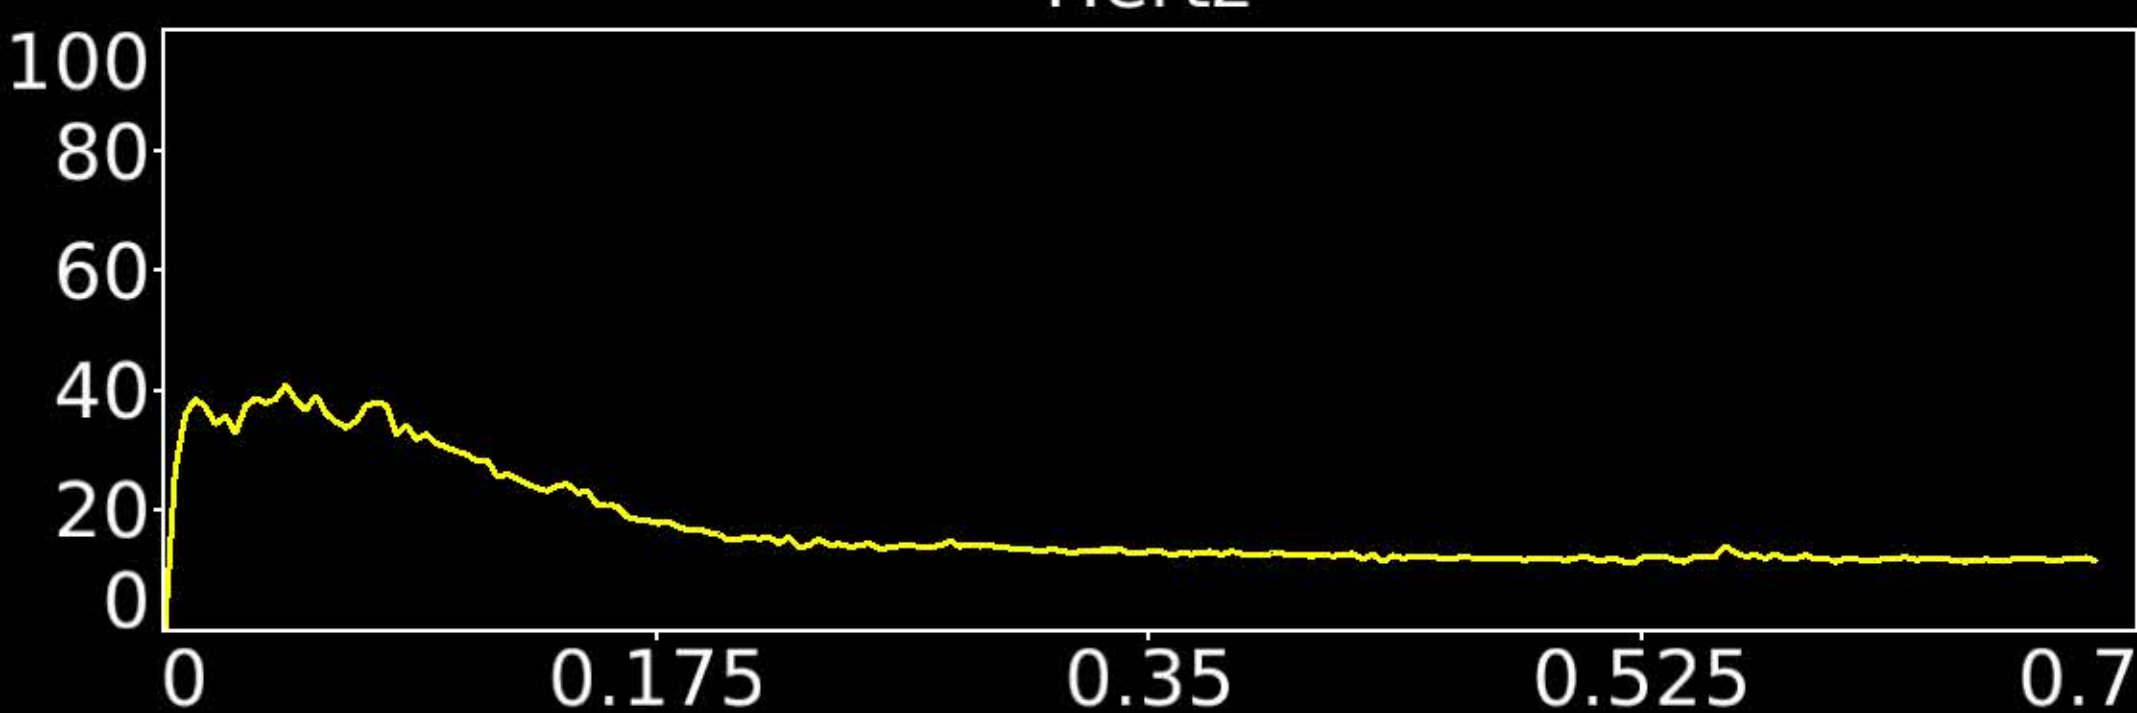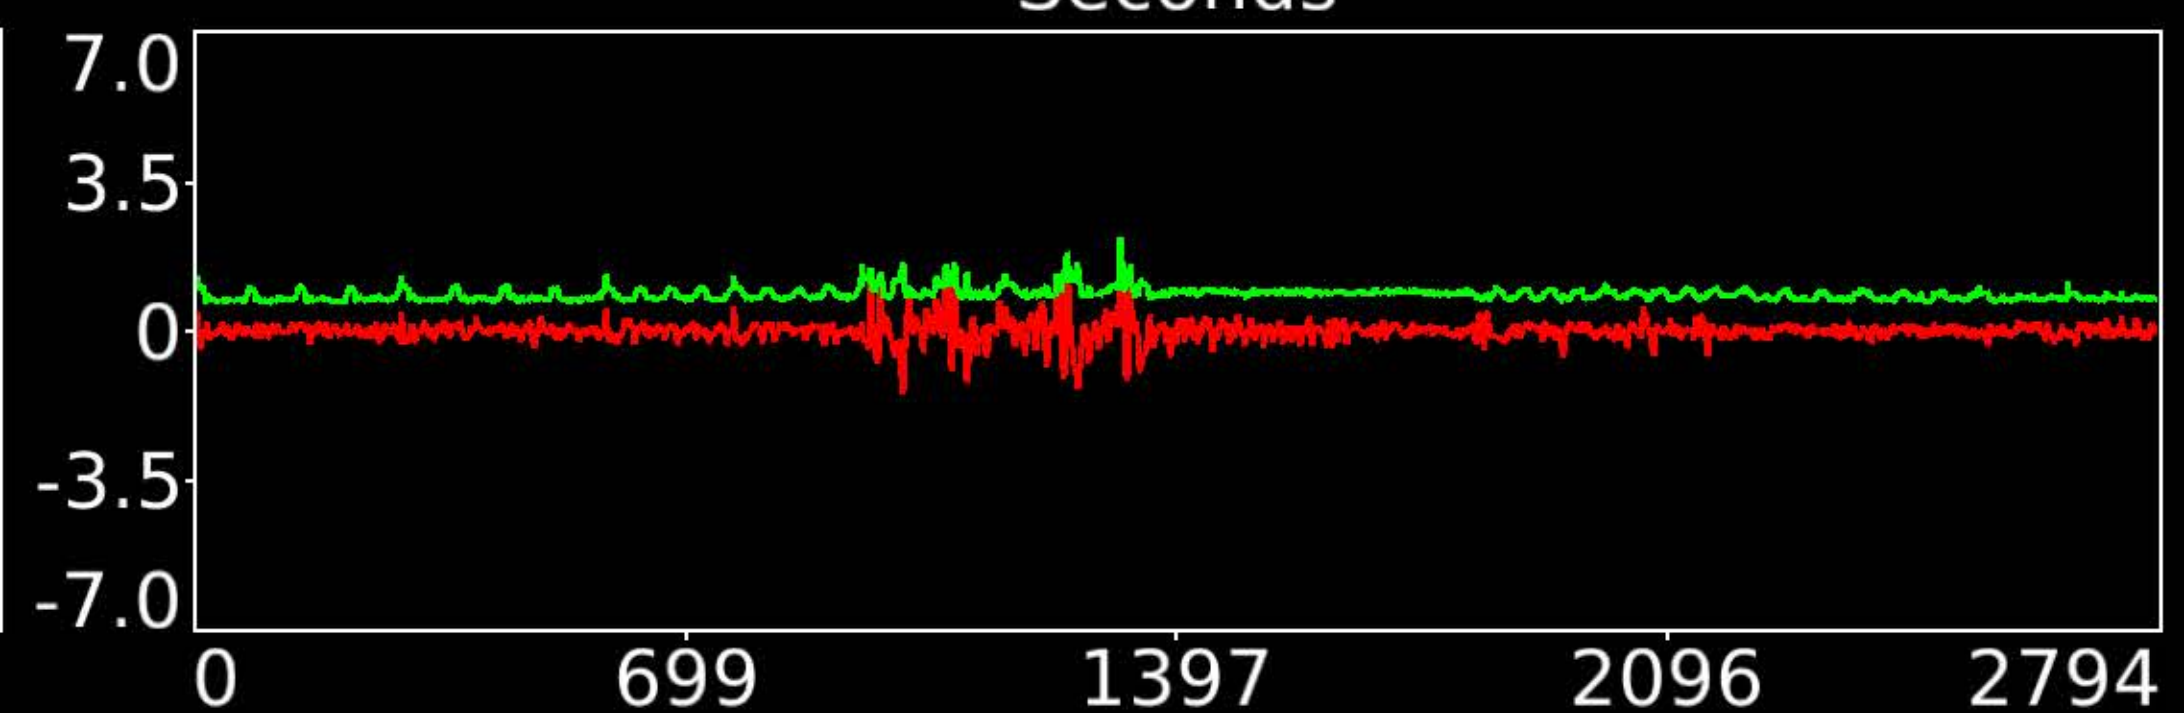

|                           |                            |                               |  |
|---------------------------|----------------------------|-------------------------------|--|
| Number & Class: 26 Signal |                            | Name: Left Hand Motor Network |  |
| RVT Correlated: No        | DVARS Dip Associated: Yes  | Cross-Subject Variable: Yes   |  |
| Single Subject: Yes       | % Variance Explained: 1.55 | Globality Index: 0.26         |  |
| Task Component: 31        | Rest Component: 40         | Task Modulated: No            |  |

Rationale: Spatial map includes positive and negative patches that respect known somatotopic sensori-motor organization (Left Hand)



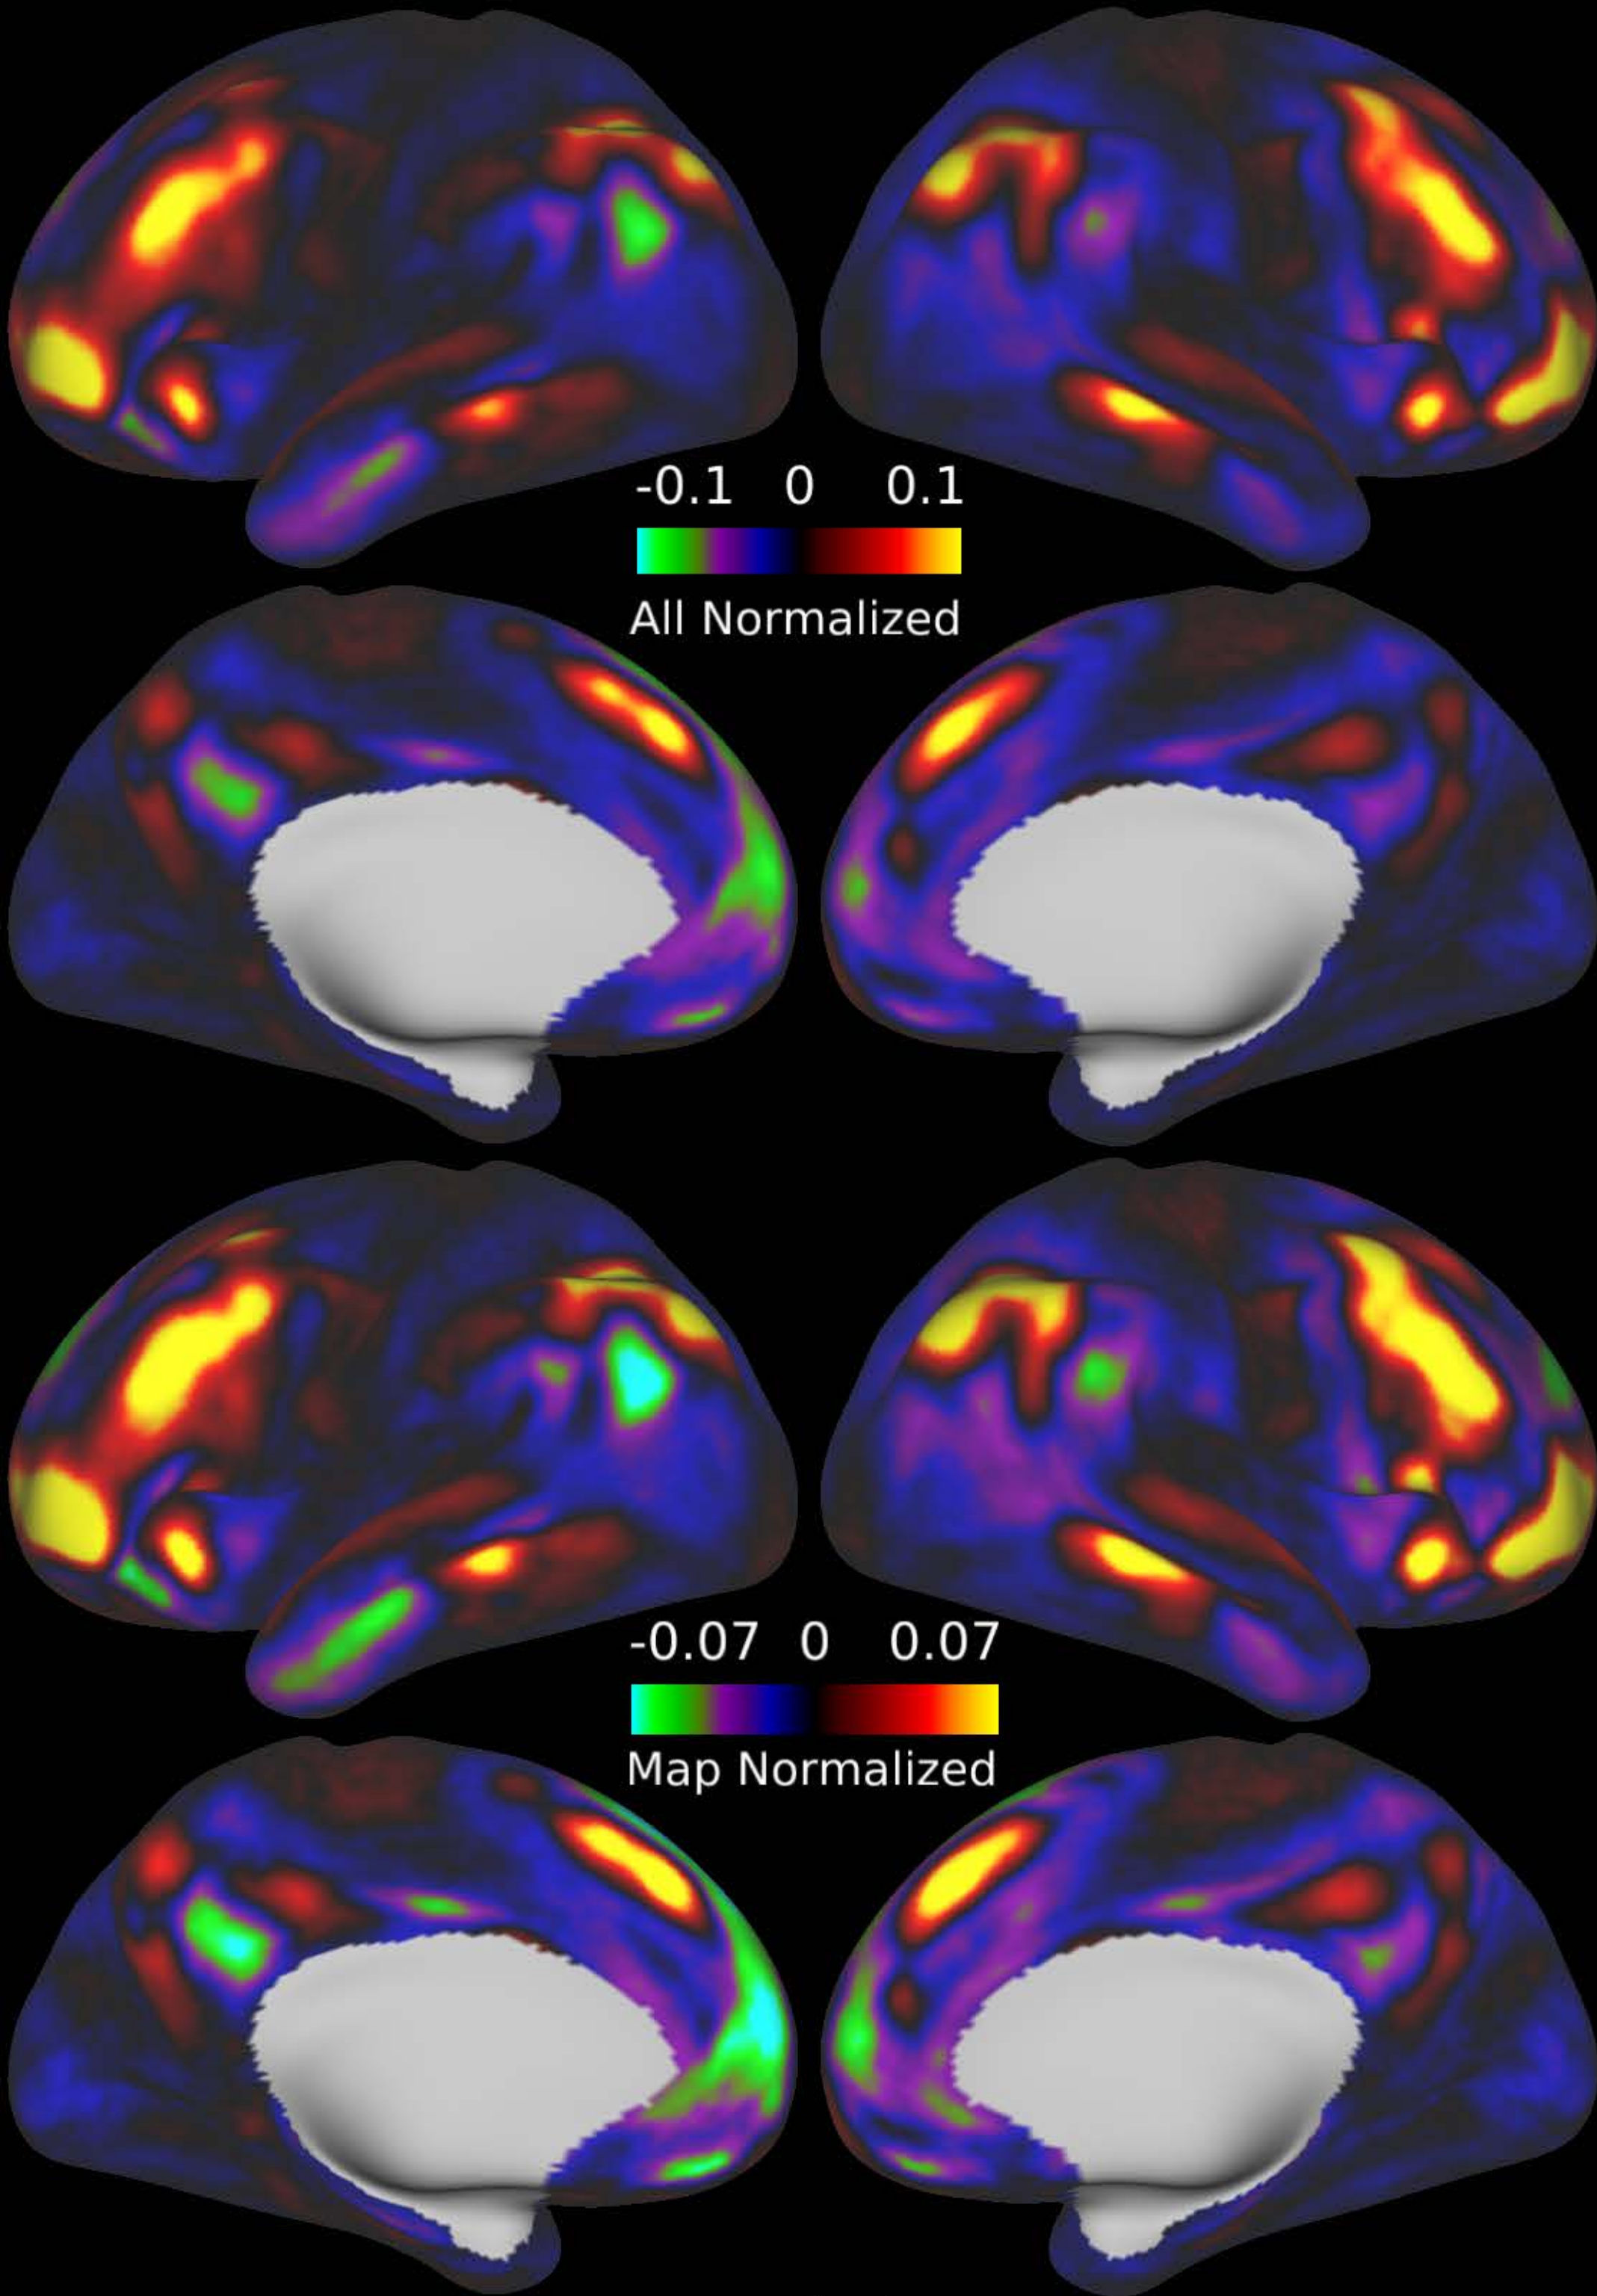

Hertz

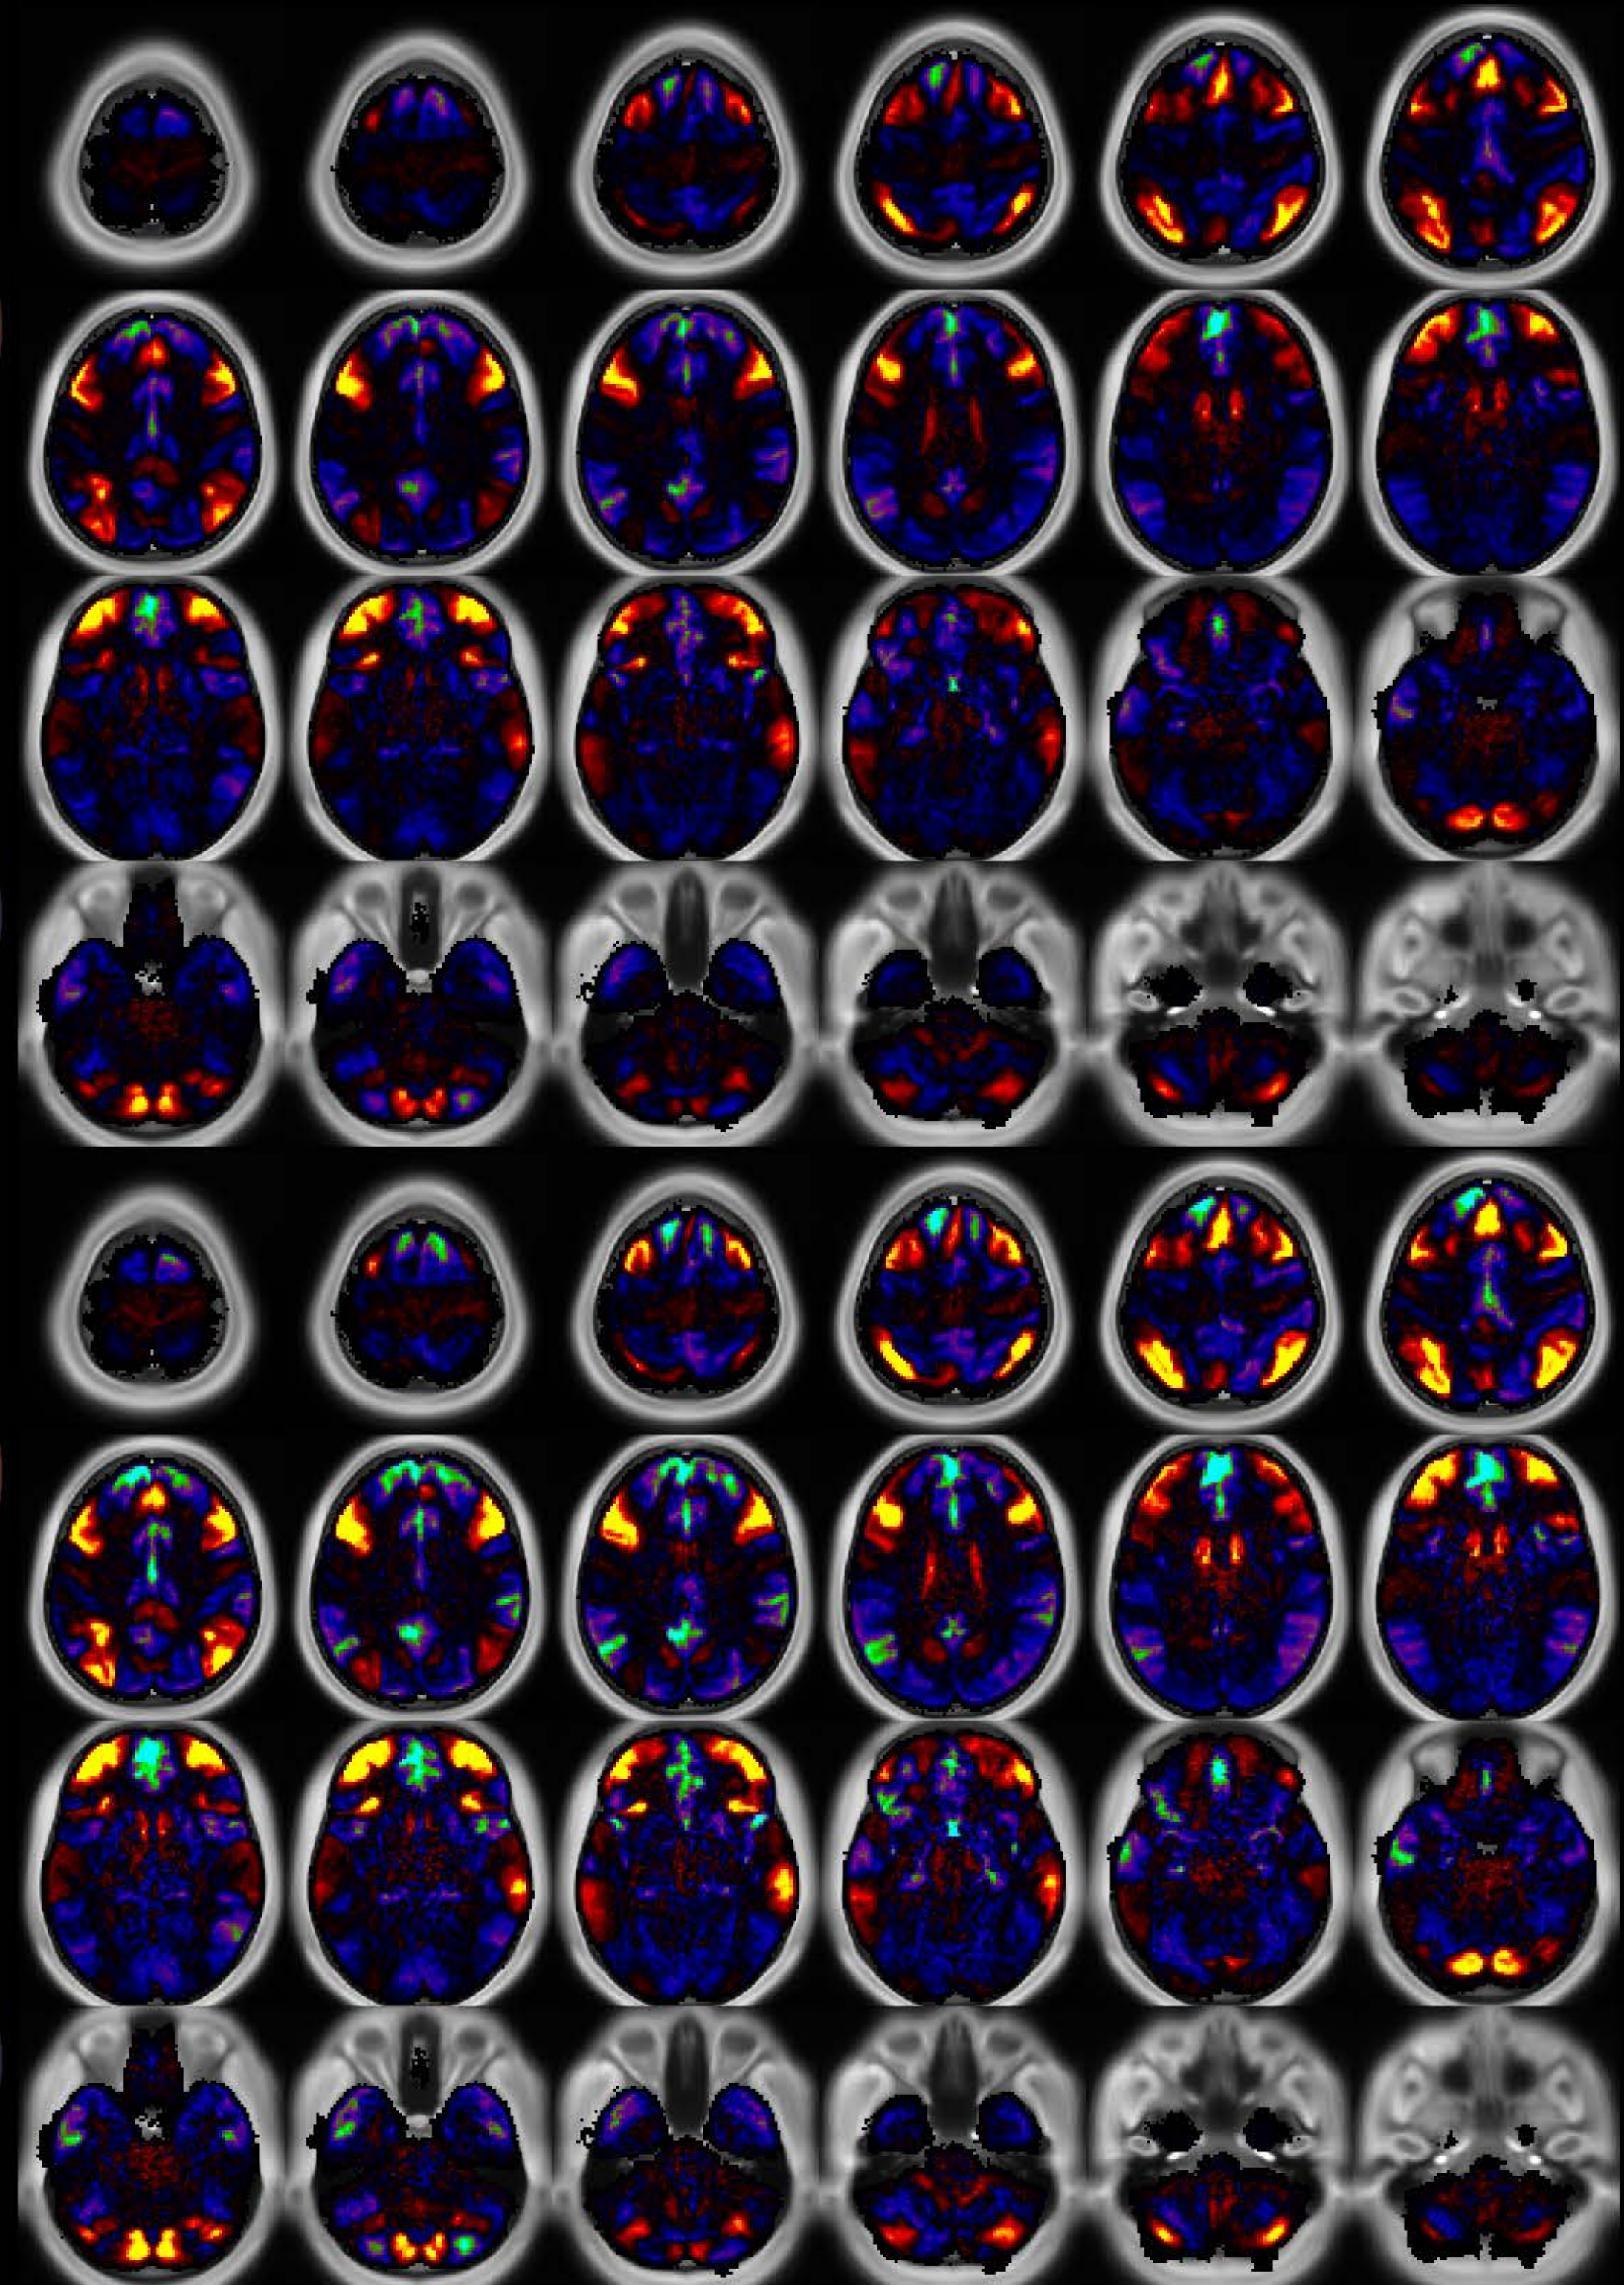

Seconds

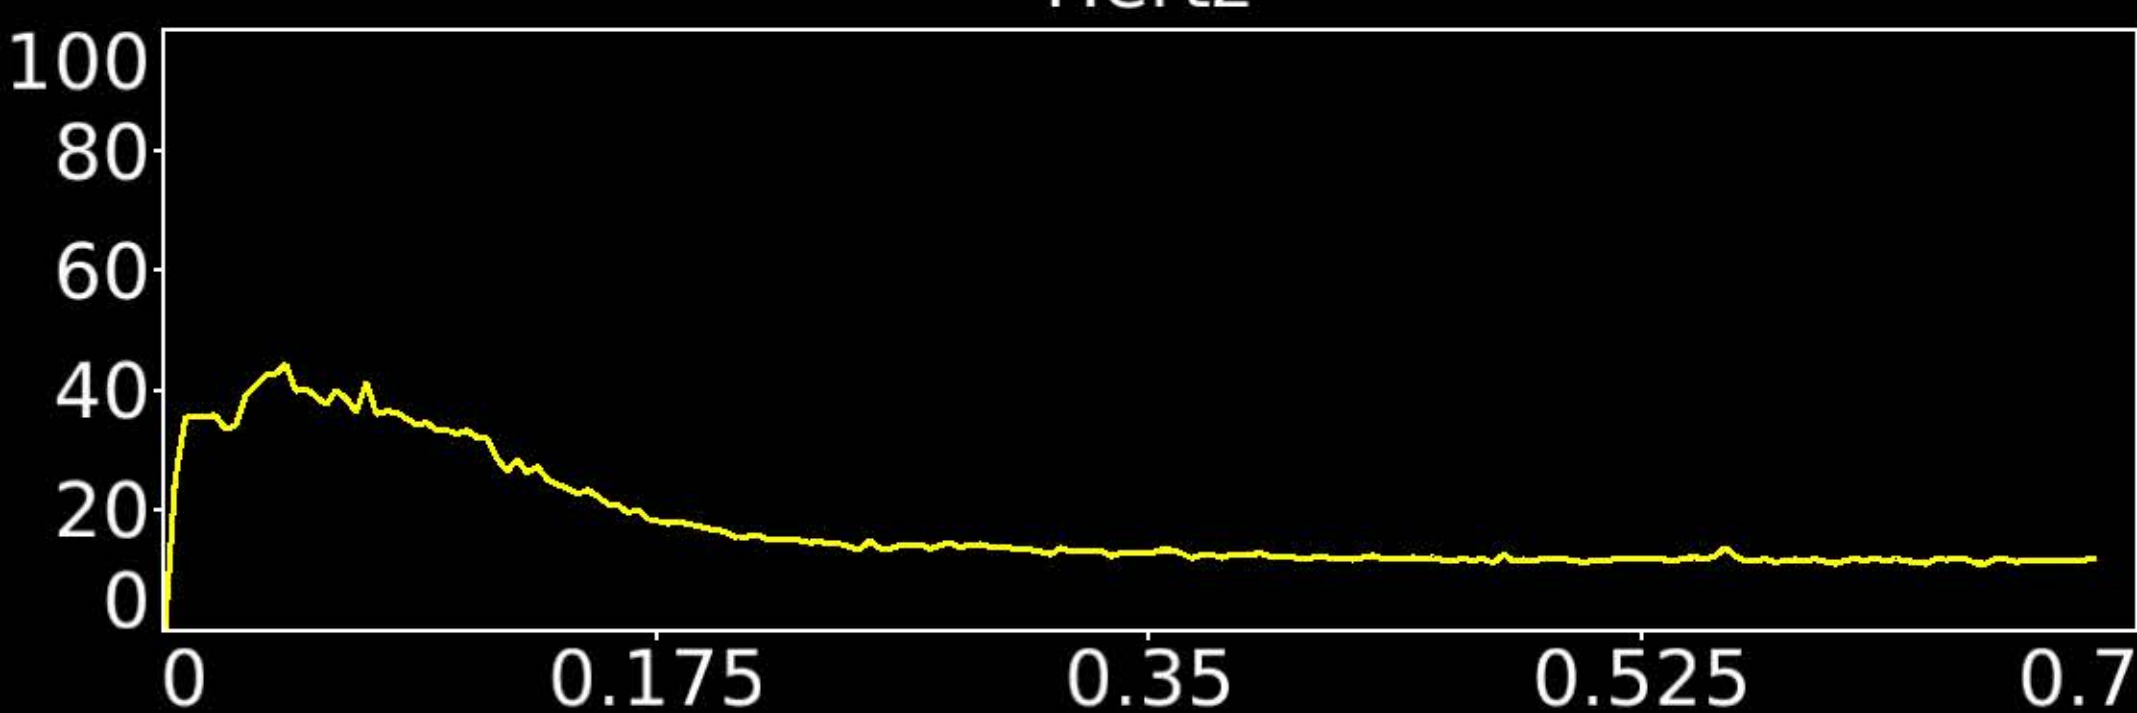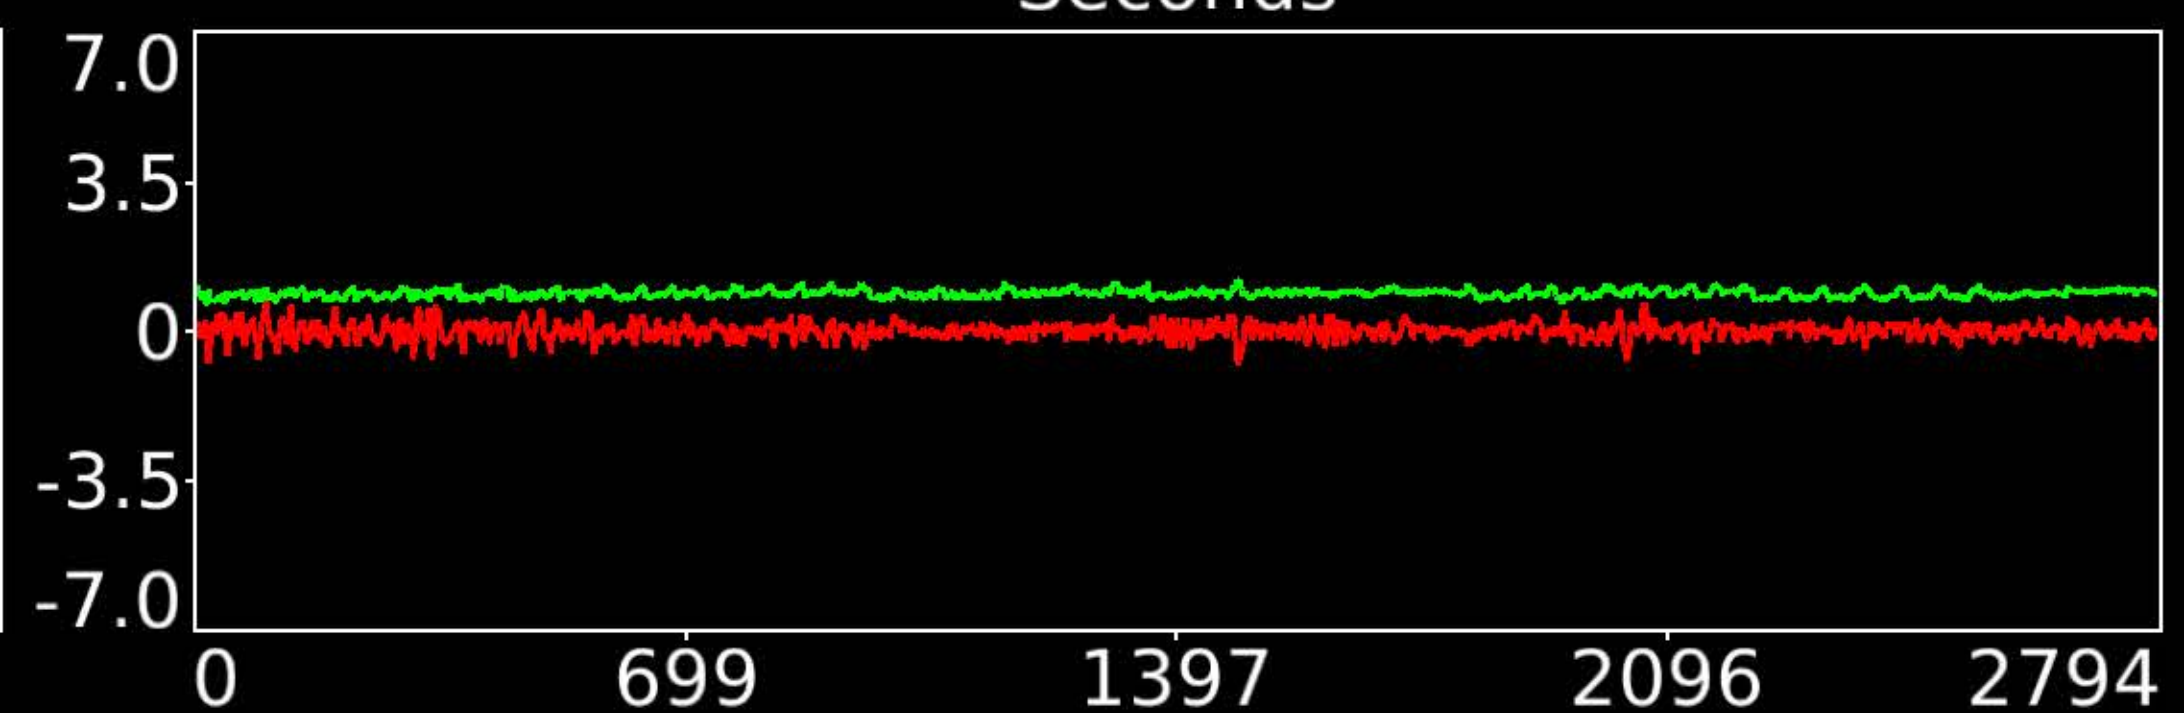

|                                                                                                                      |                            |                                 |  |
|----------------------------------------------------------------------------------------------------------------------|----------------------------|---------------------------------|--|
| Number & Class: 27 Signal                                                                                            |                            | Name: Fronto-Parietal Bilateral |  |
| RVT Correlated: No                                                                                                   | DVARS Dip Associated: No   | Cross-Subject Variable: No      |  |
| Single Subject: No                                                                                                   | % Variance Explained: 1.49 | Globality Index: 0.79           |  |
| Task Component: No                                                                                                   | Rest Component: No         | Task Modulated: No              |  |
| Rationale: Spatial map includes positive and negative patches that respect known RSNs (e.g. Fronto-Parietal Network) |                            |                                 |  |



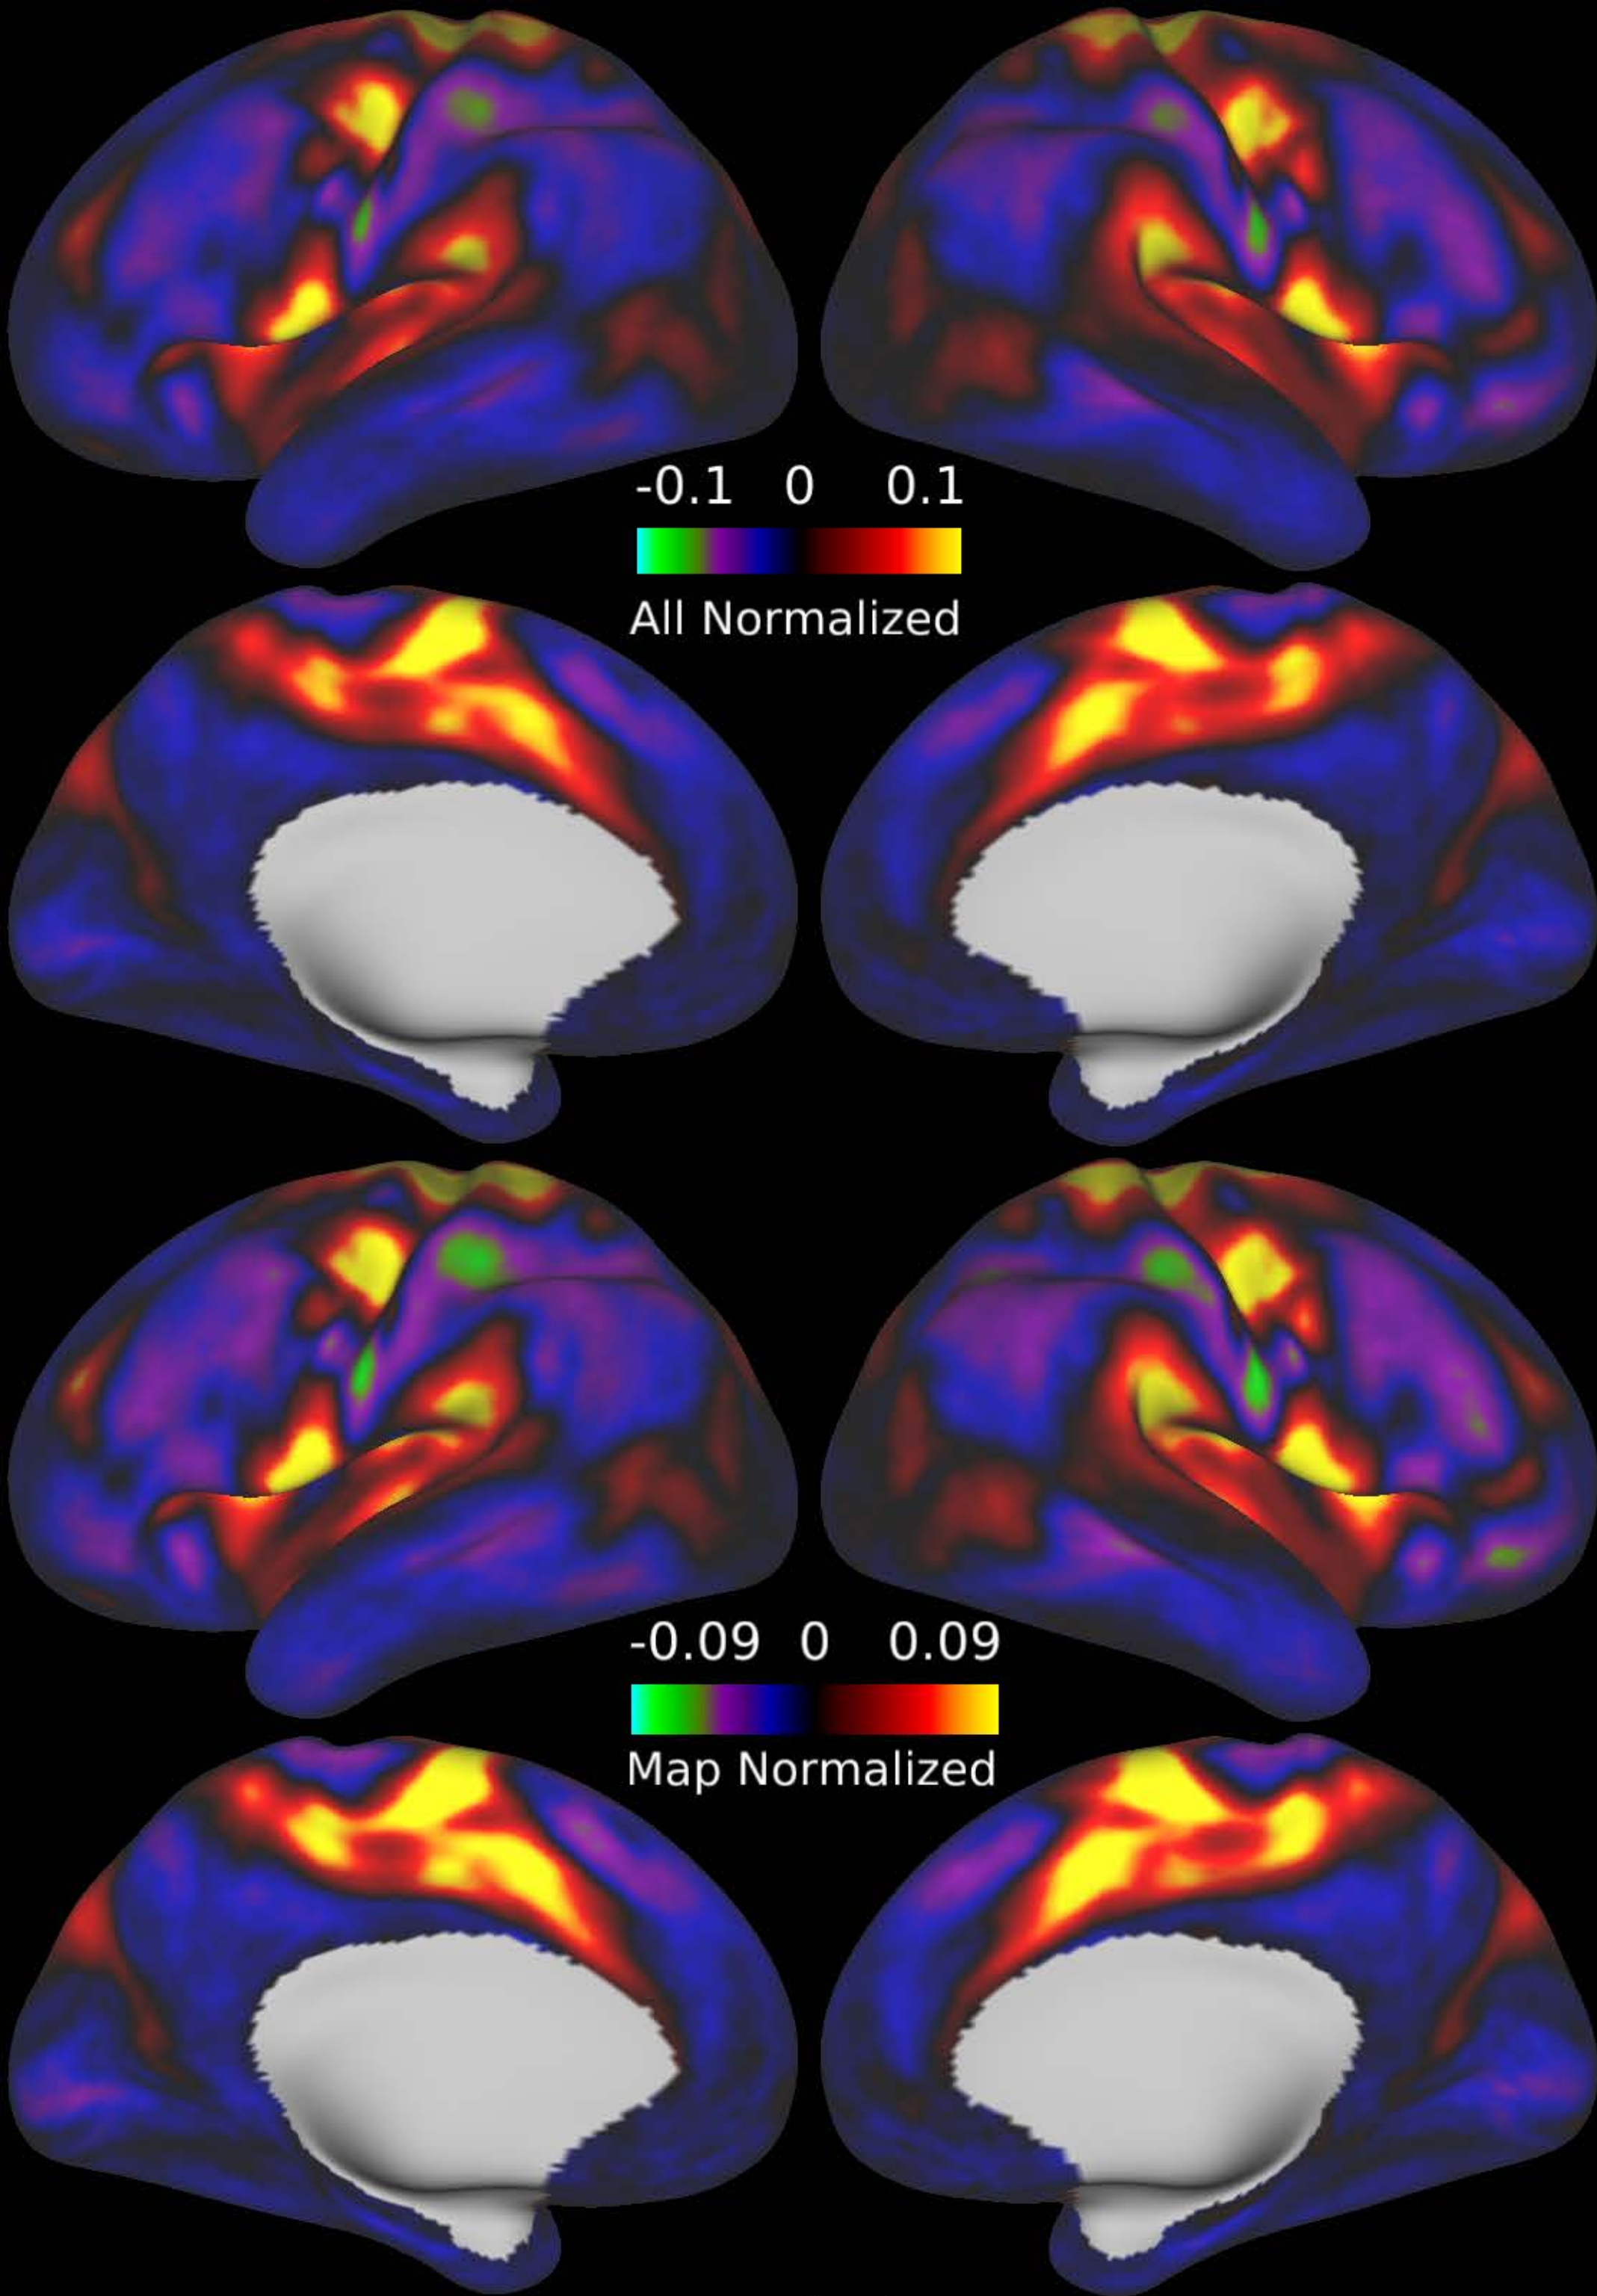

Hertz

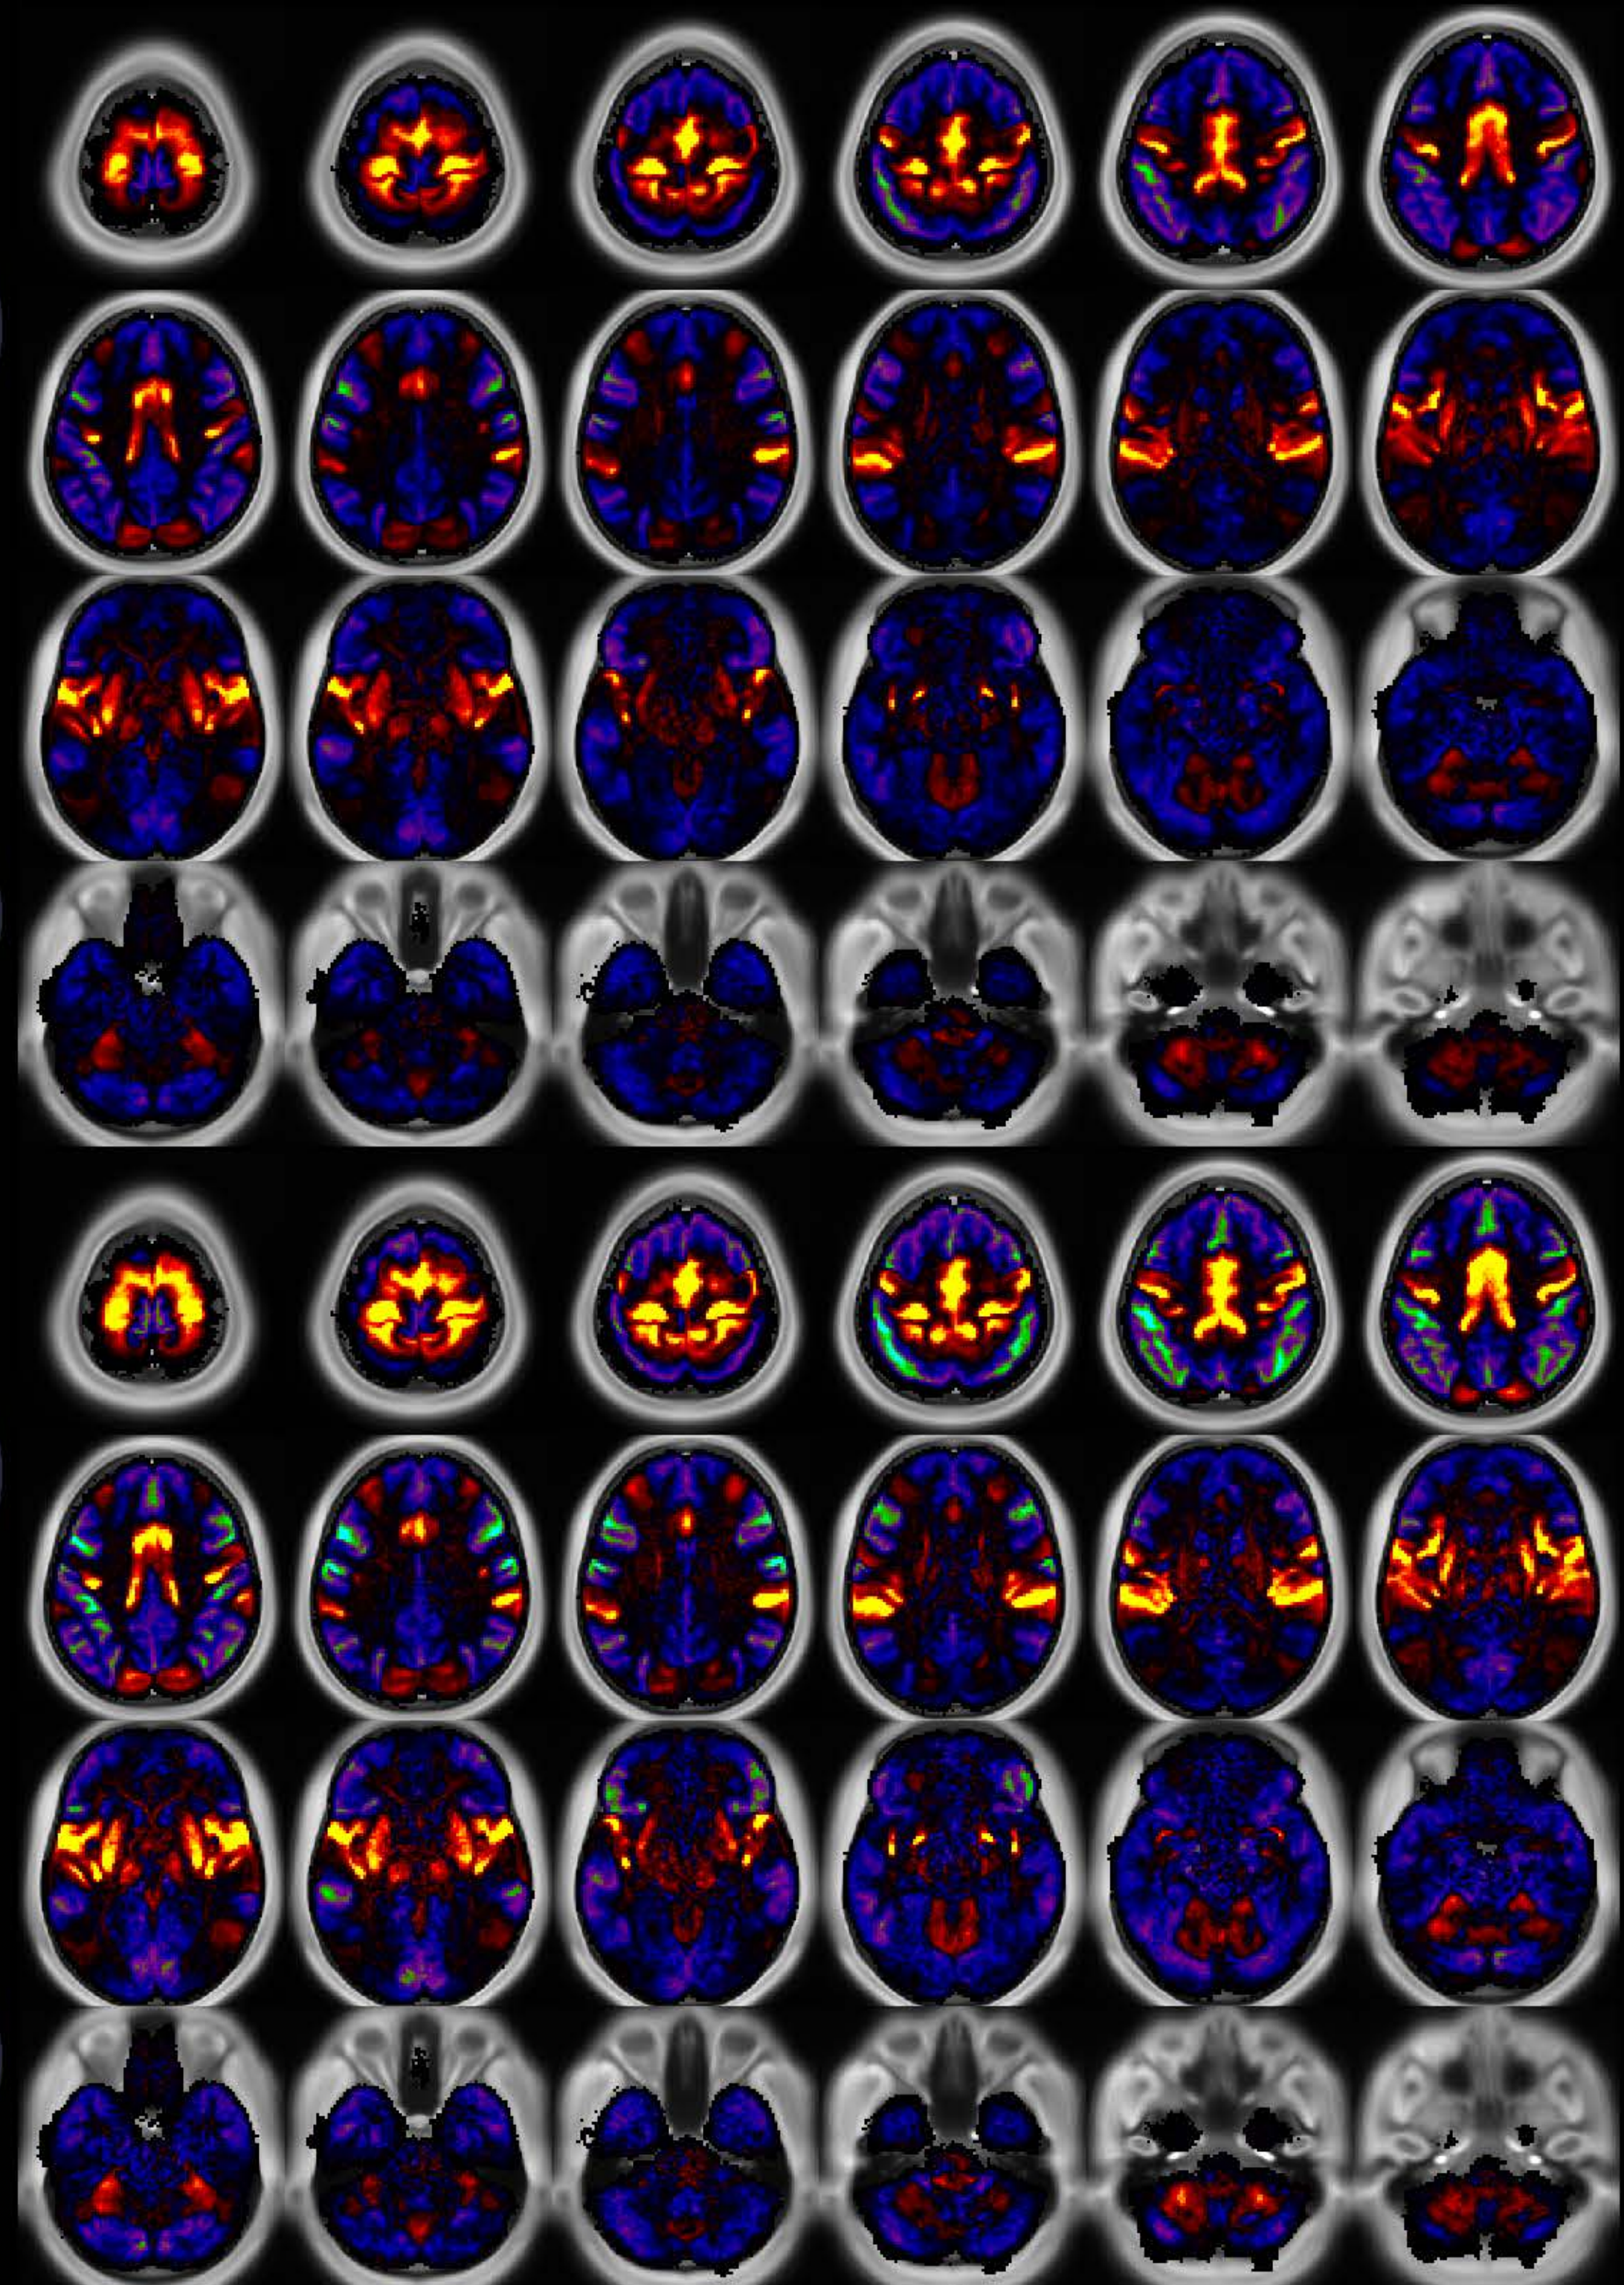

Seconds

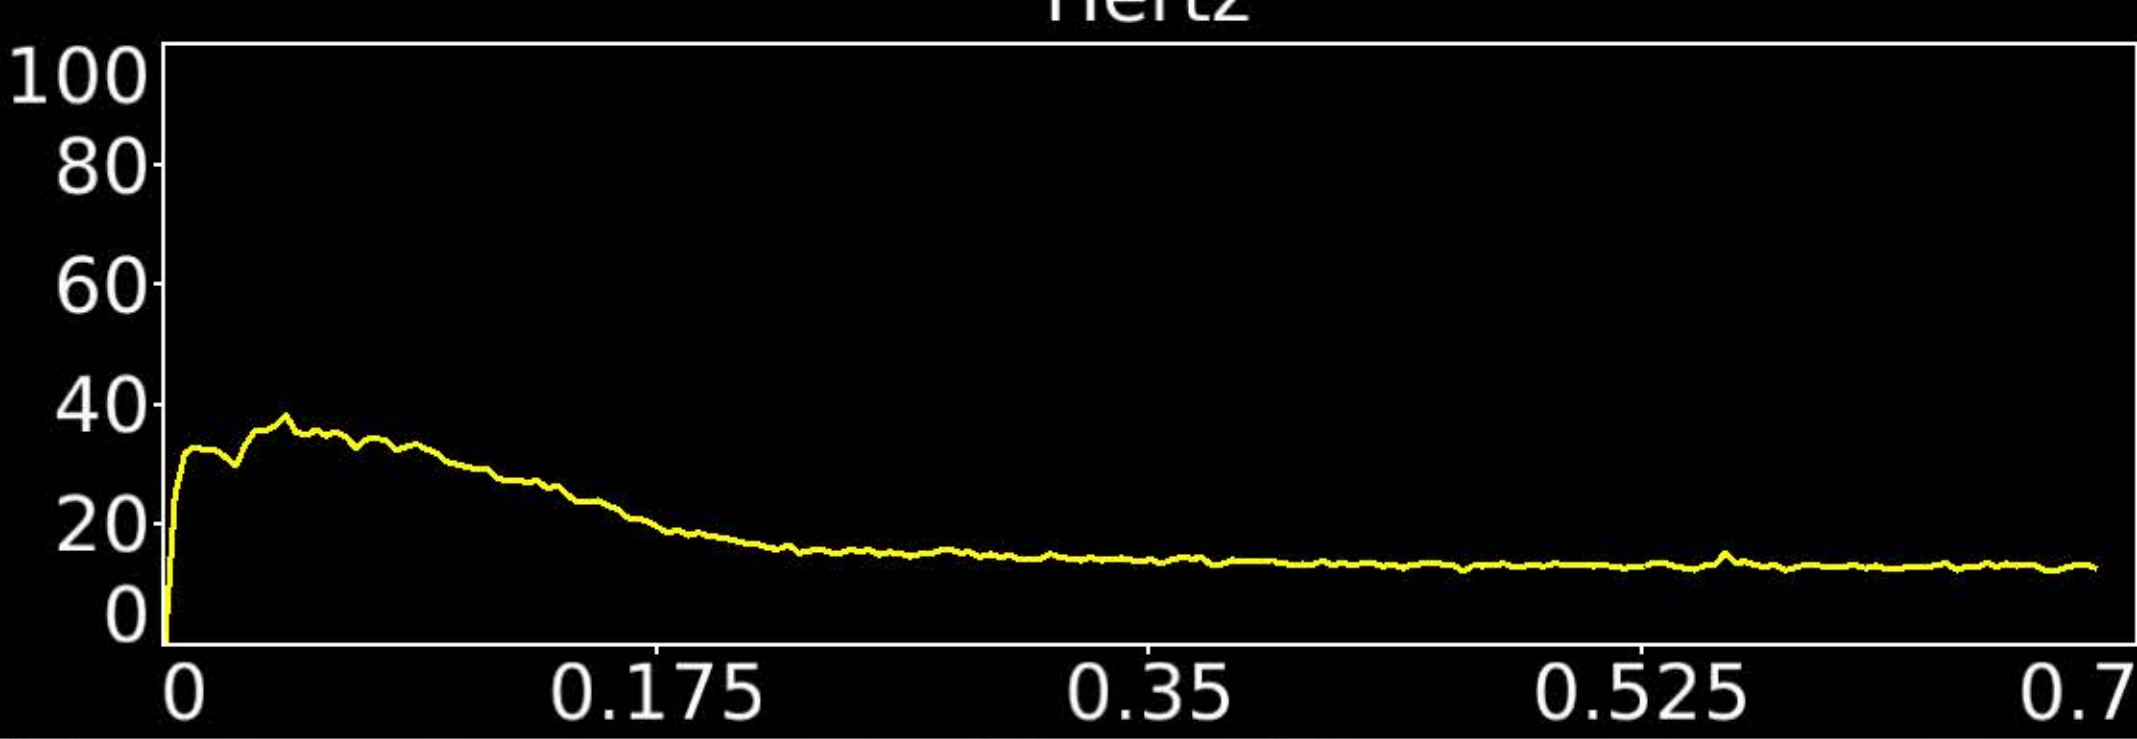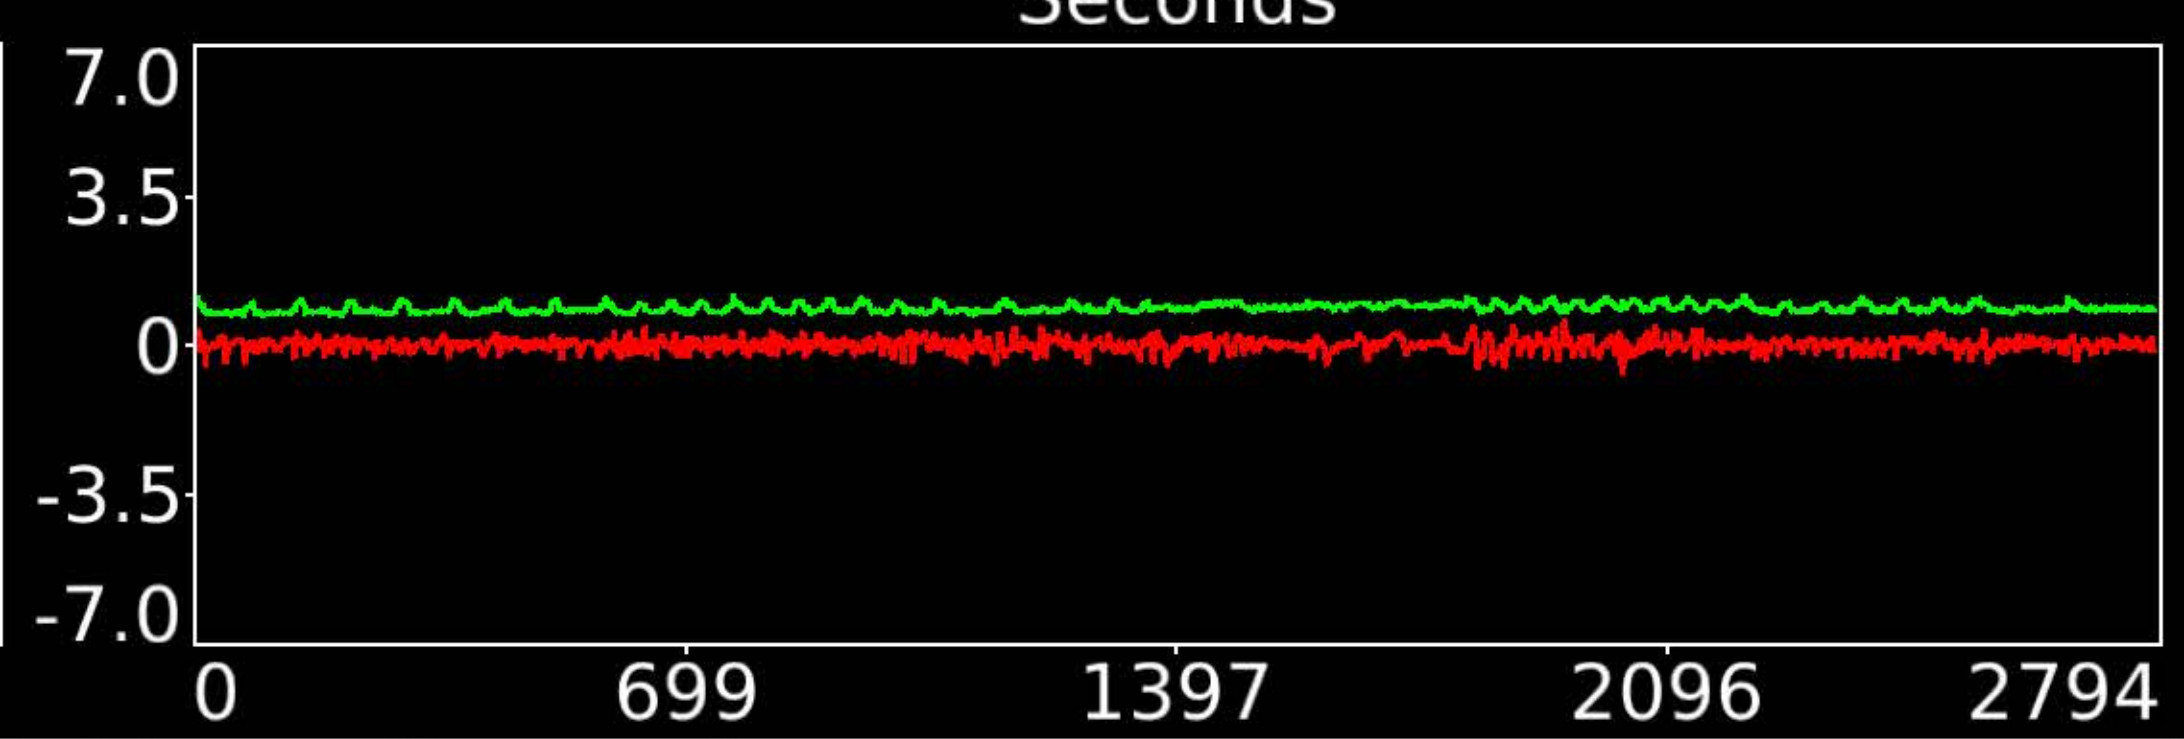

|                           |                            |                                 |  |
|---------------------------|----------------------------|---------------------------------|--|
| Number & Class: 28 Signal |                            | Name: Eye + Trunk Motor Network |  |
| RVT Correlated: No        | DVARS Dip Associated: No   | Cross-Subject Variable: No      |  |
| Single Subject: No        | % Variance Explained: 1.48 | Globality Index: 0.69           |  |
| Task Component: 29        | Rest Component: 39         | Task Modulated: No              |  |

Rationale: Spatial map includes positive and negative patches that respect known somatotopic sensori-motor organization (Eye and Trunk)



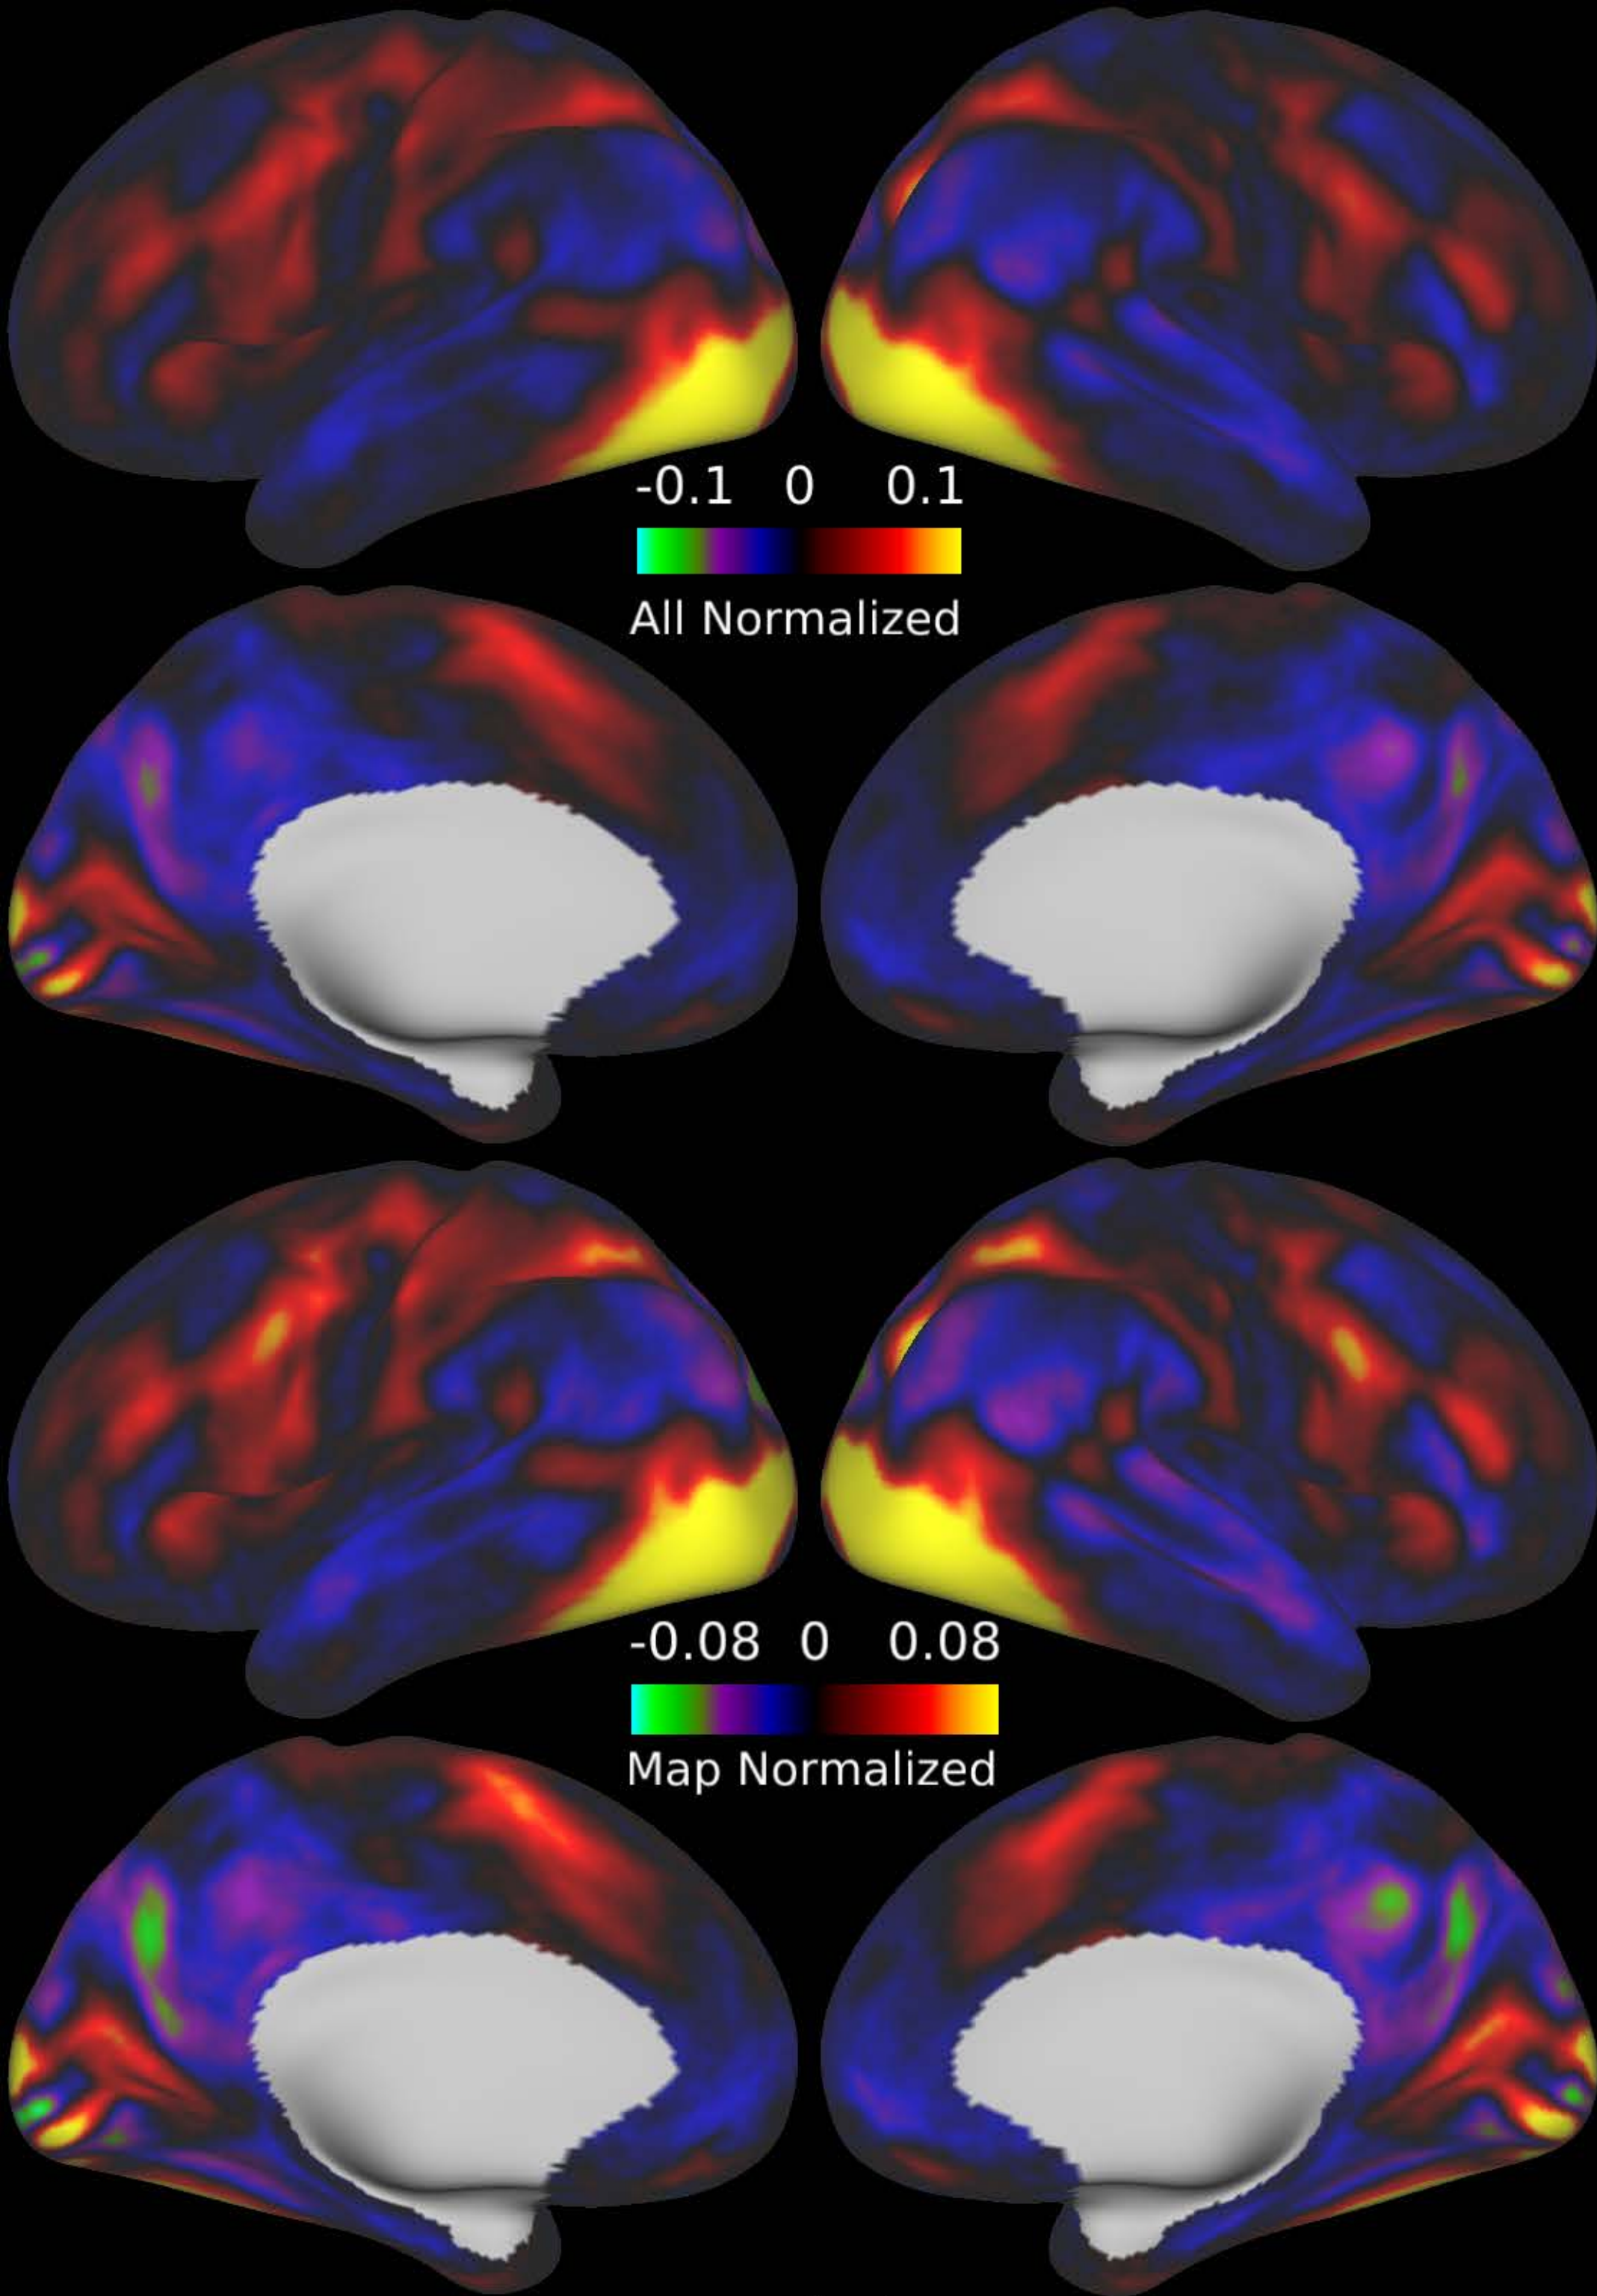

Hertz

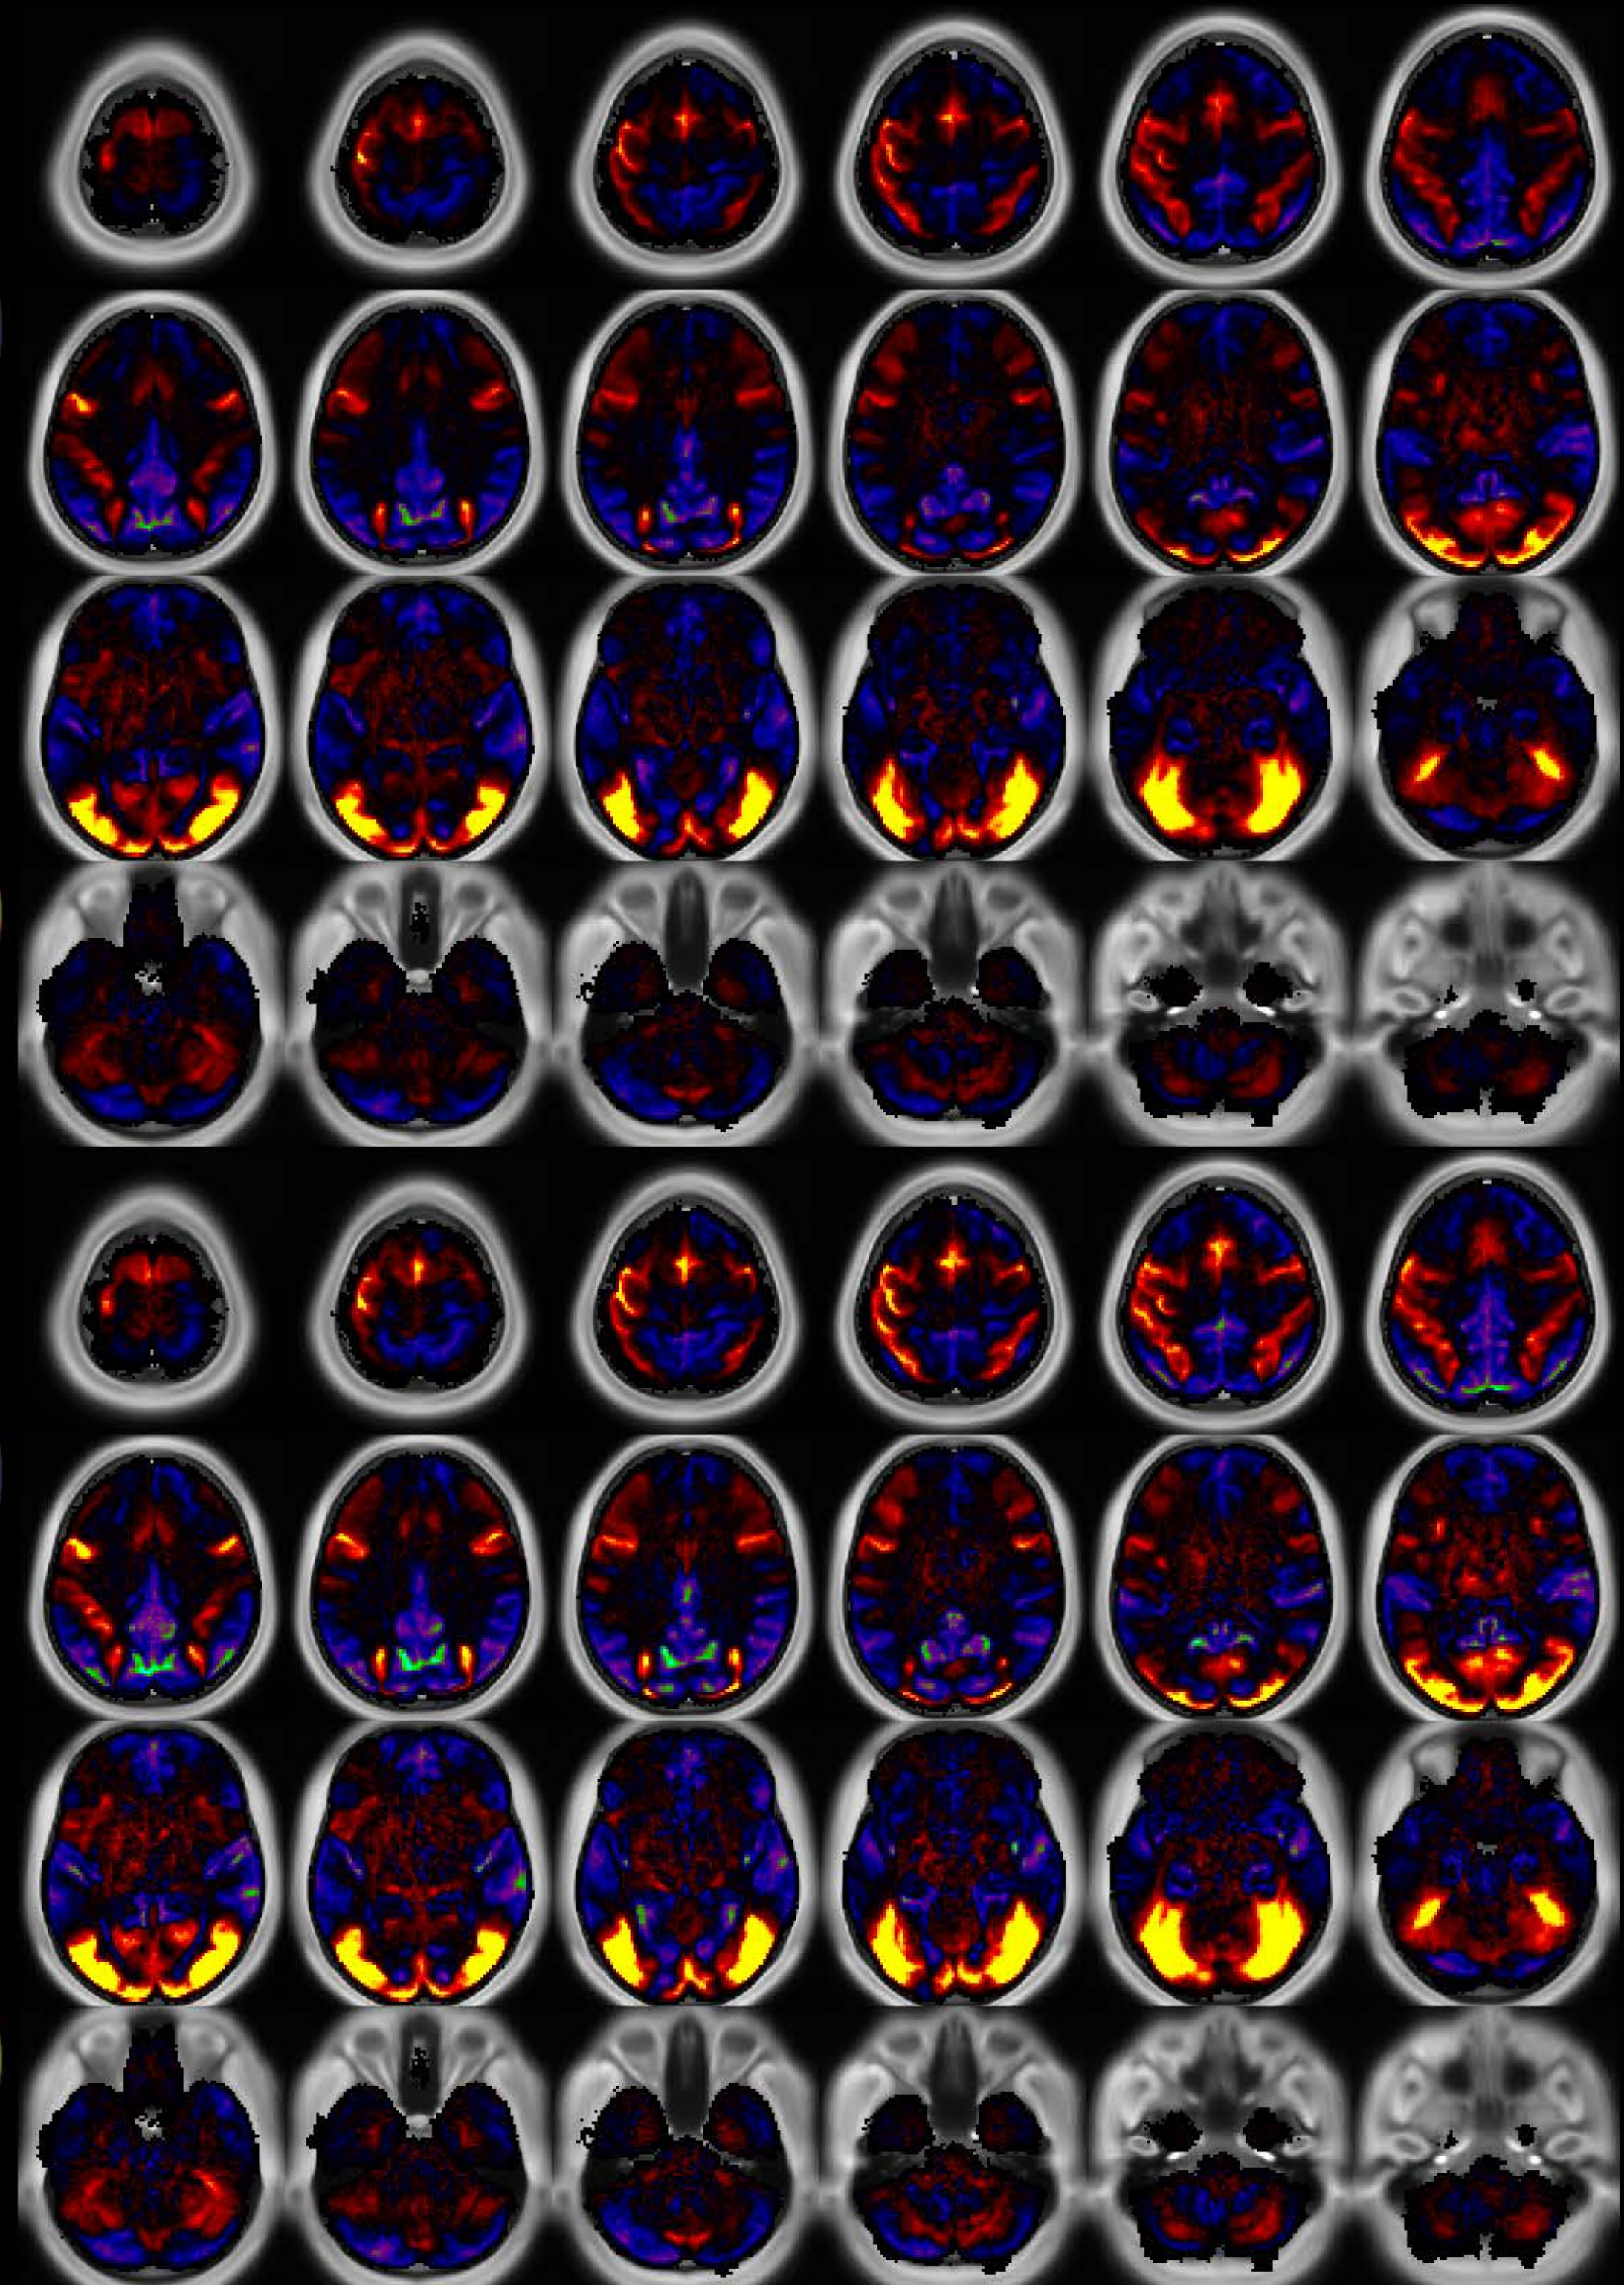

Seconds

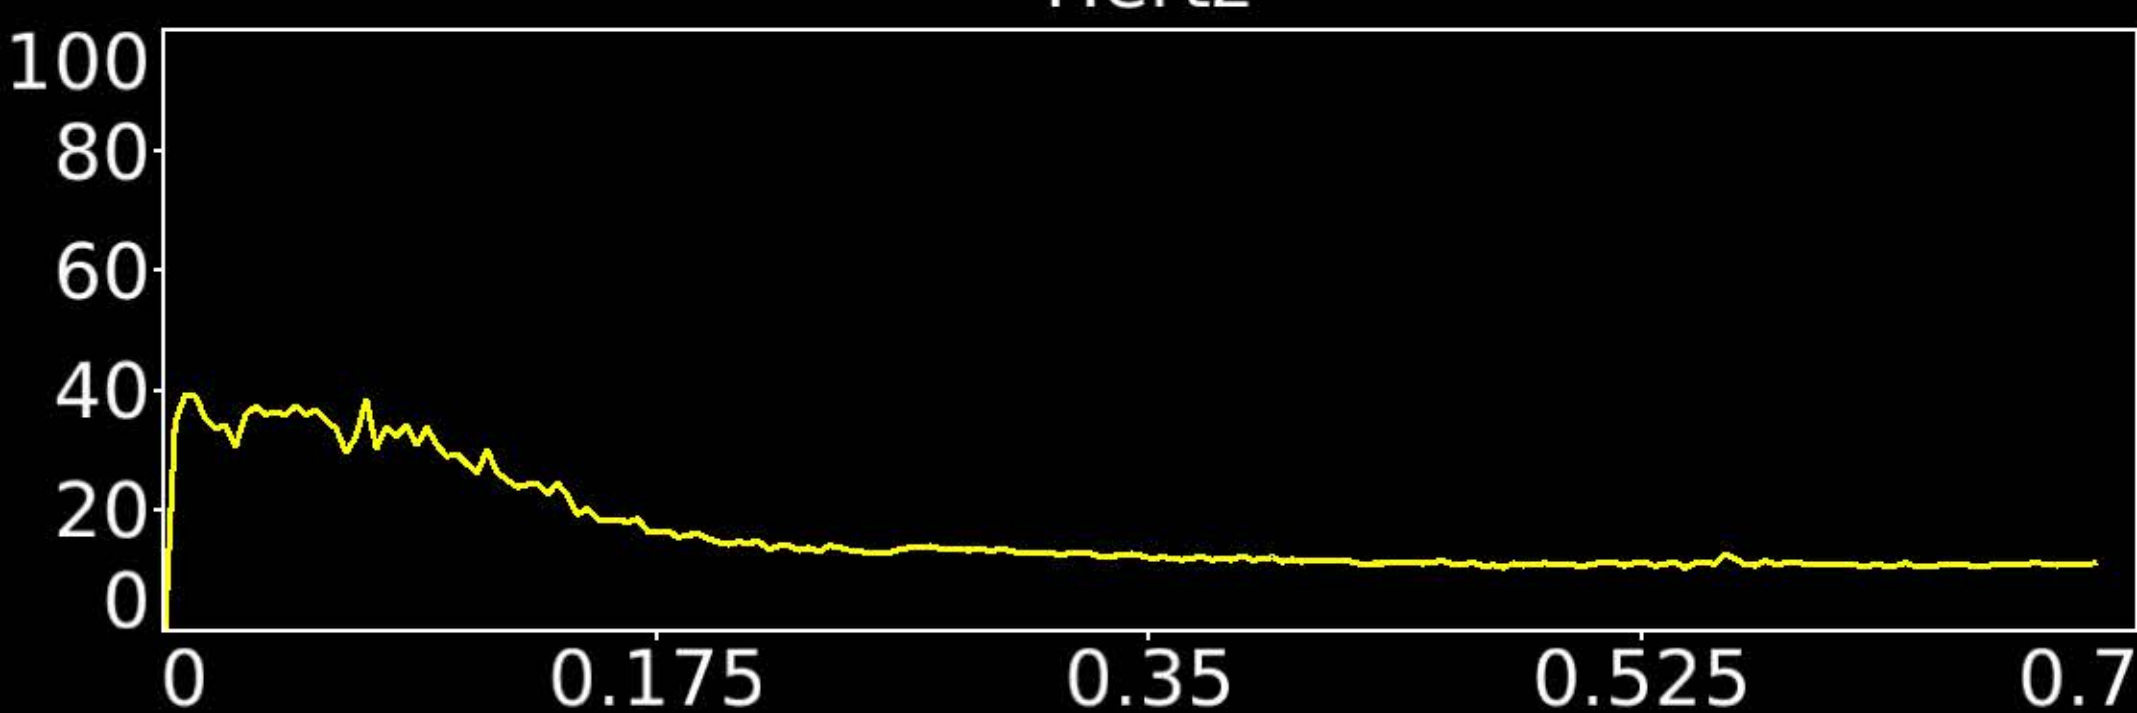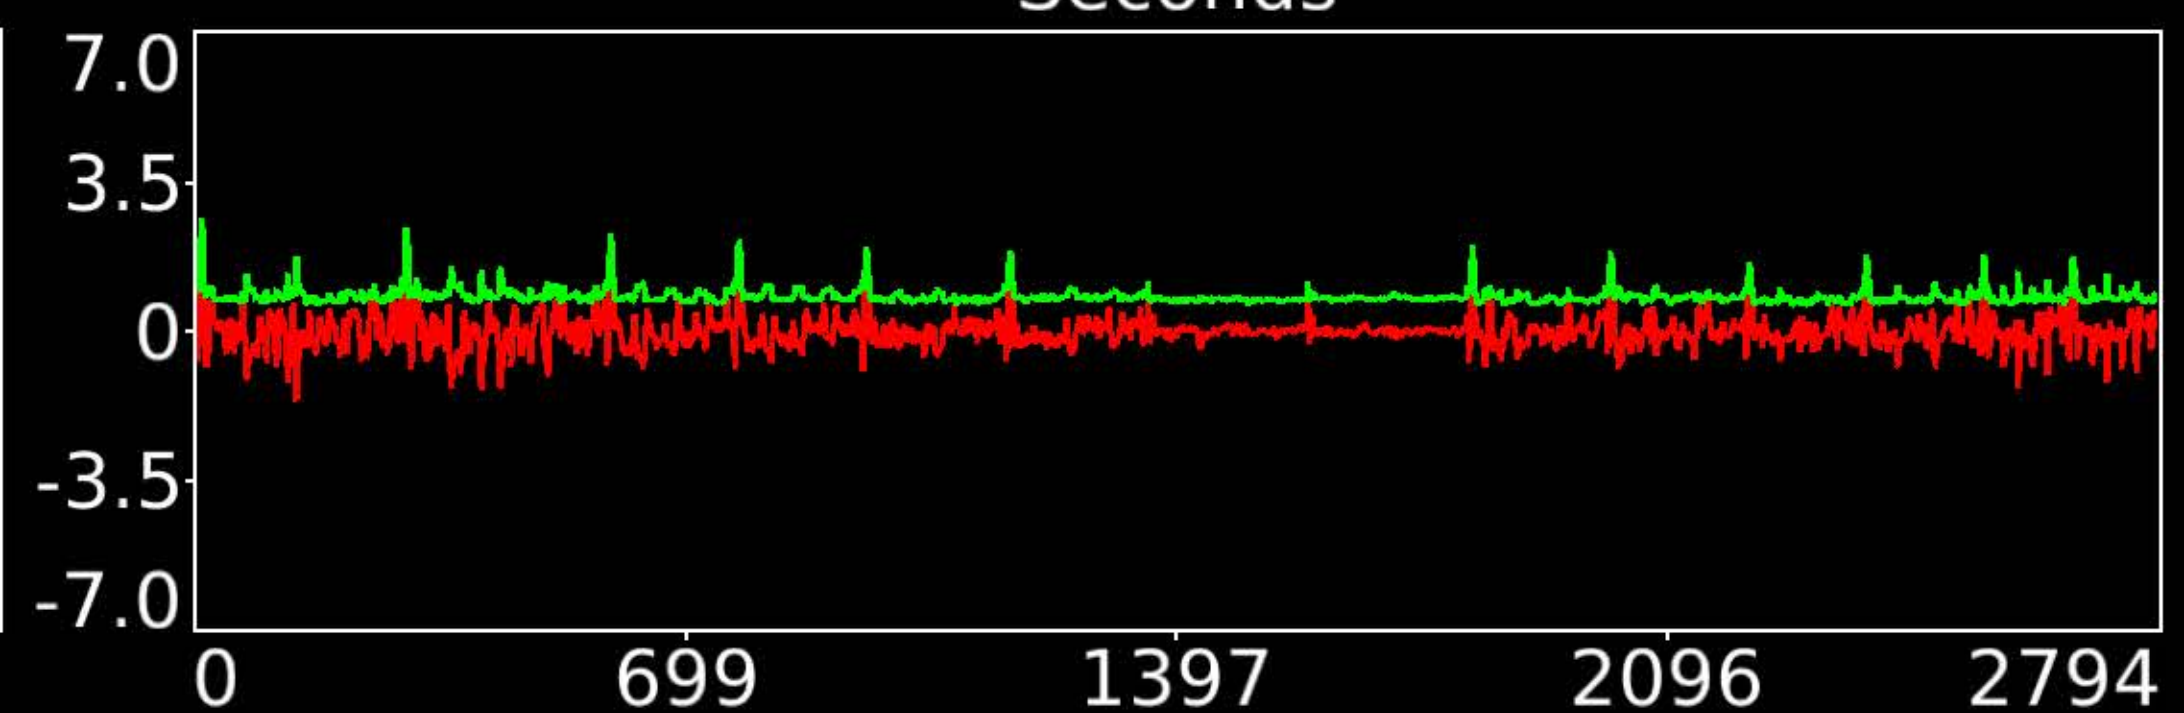

|                           |                            |                            |  |
|---------------------------|----------------------------|----------------------------|--|
| Number & Class: 29 Signal |                            | Name: Extrastriate Visual  |  |
| RVT Correlated: No        | DVARS Dip Associated: No   | Cross-Subject Variable: No |  |
| Single Subject: No        | % Variance Explained: 1.31 | Globality Index: 0.04      |  |
| Task Component: 7         | Rest Component: No         | Task Modulated: No         |  |

Rationale: Spatial map includes positive and negative patches that respect known retinotopic visual organization (Vertical vs Horizontal Meridians); Extrastriate Visual RSN



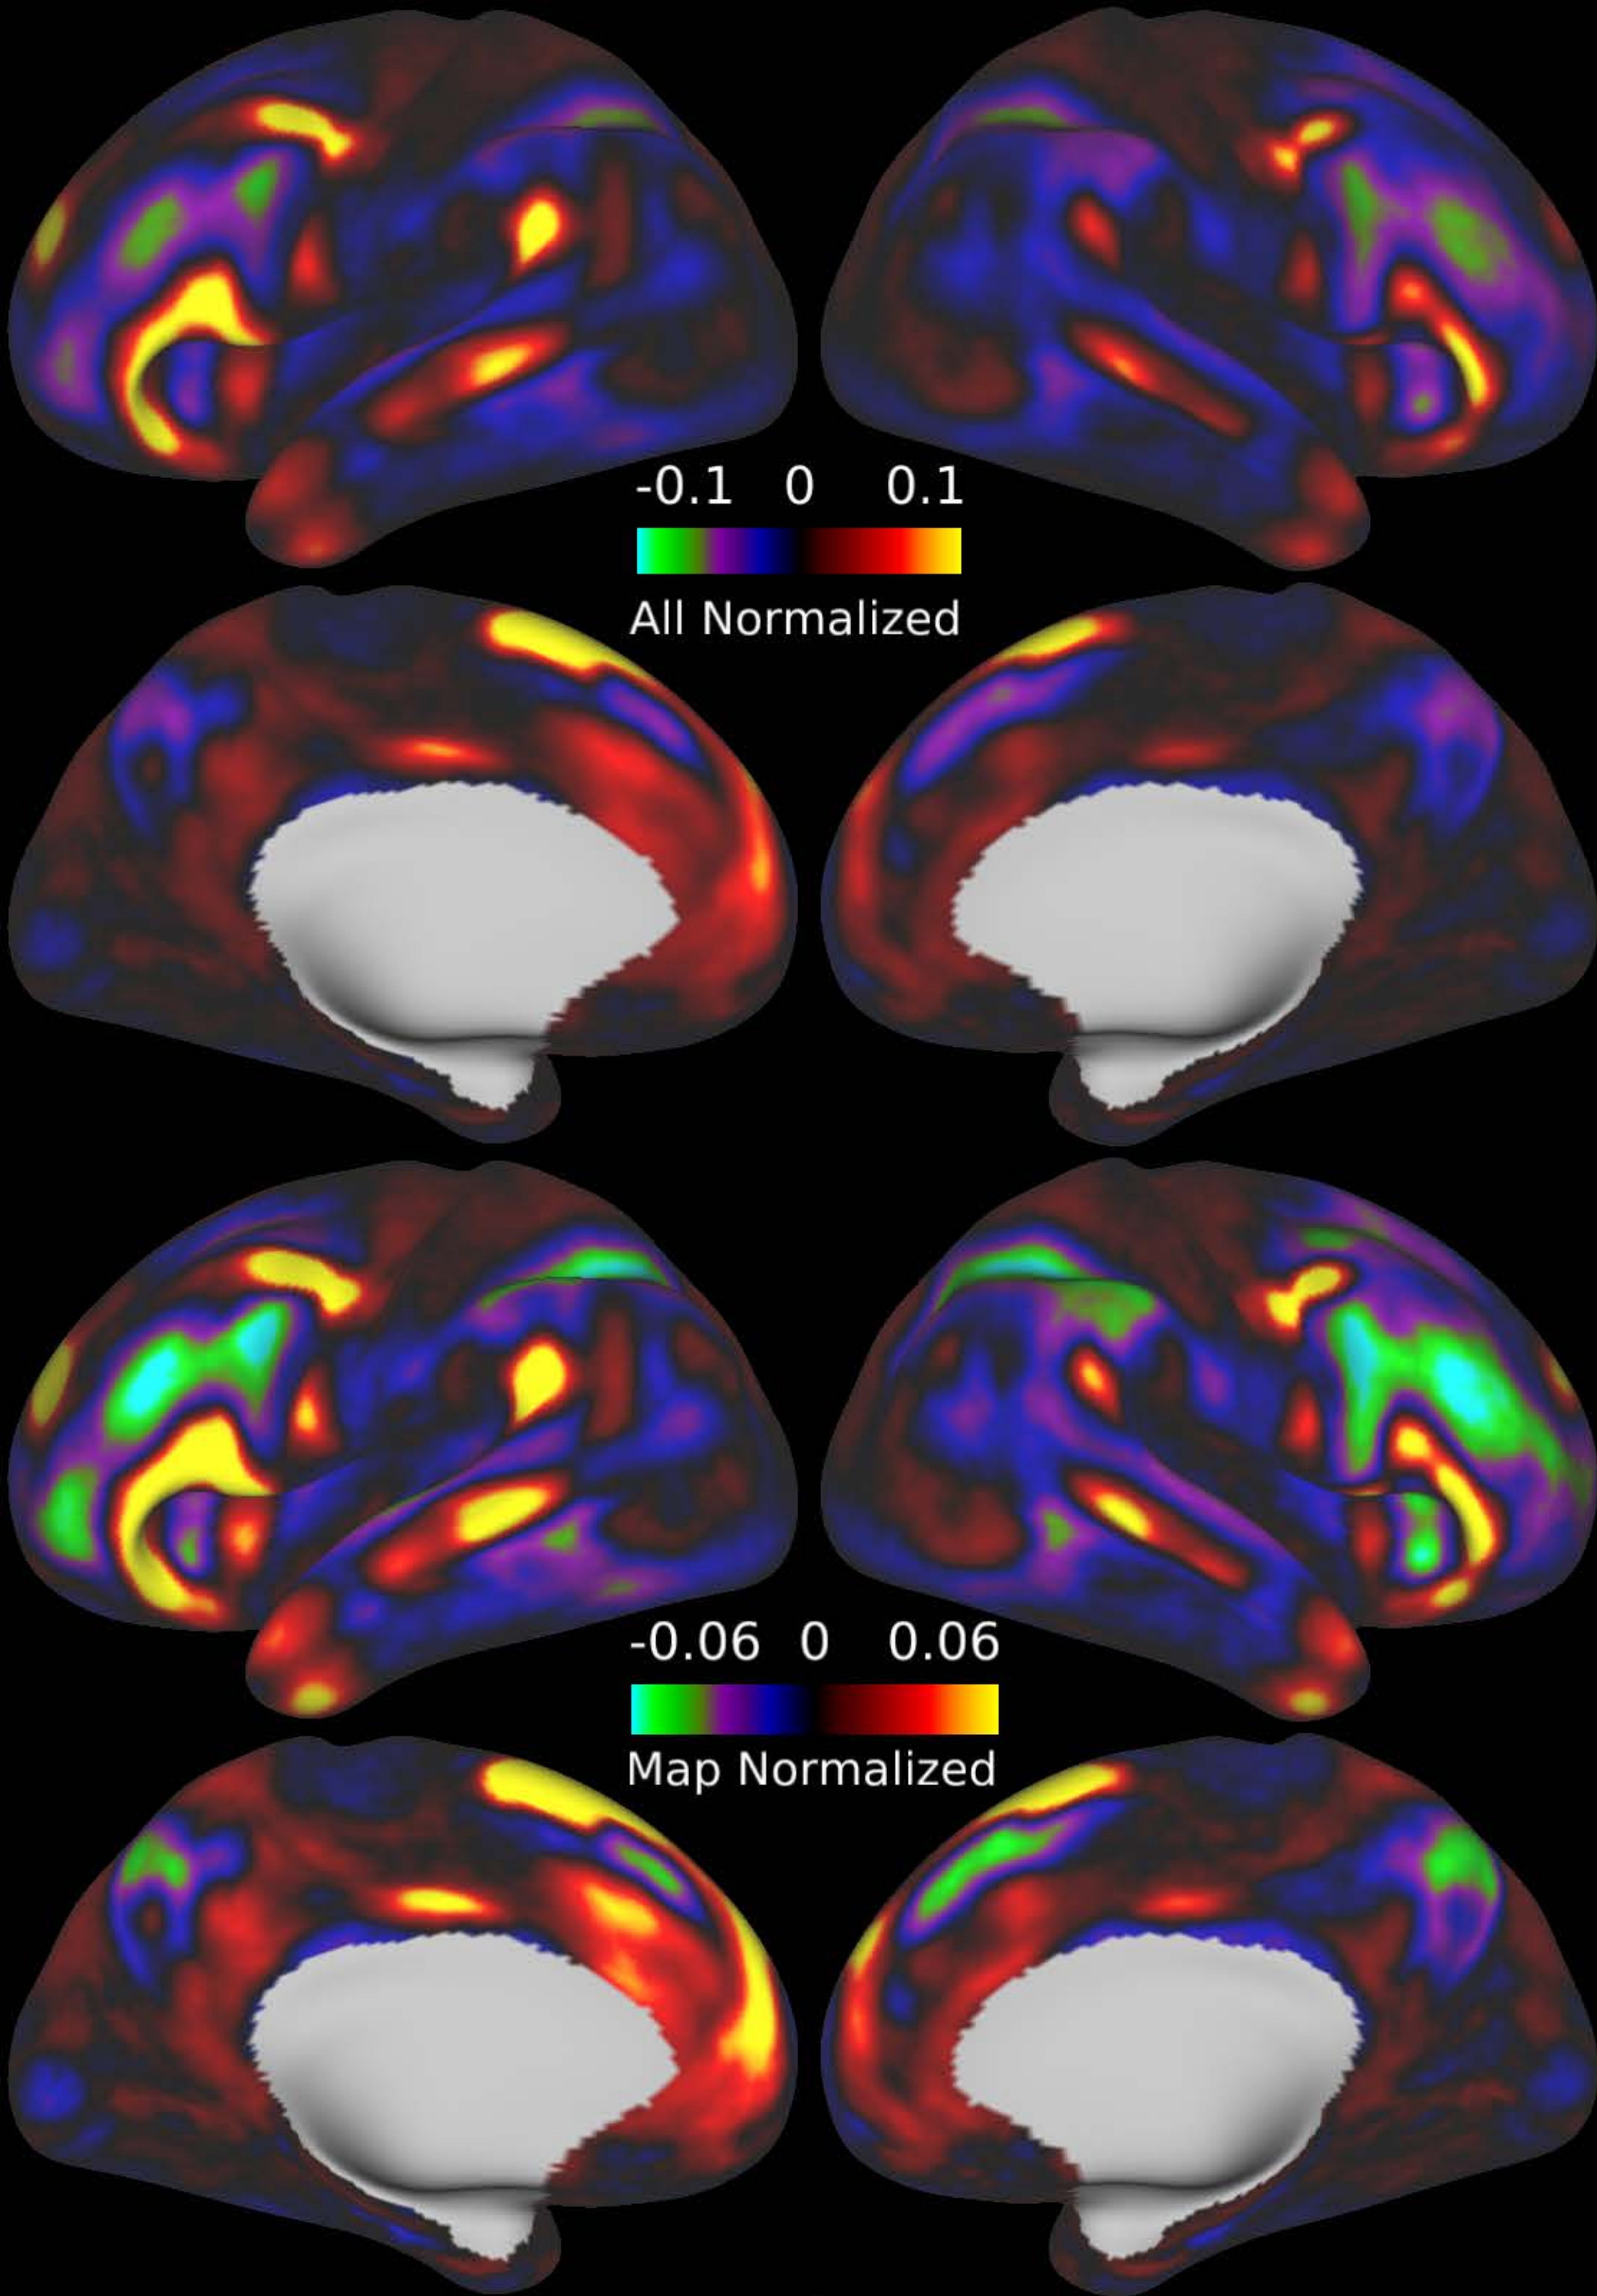

Hertz

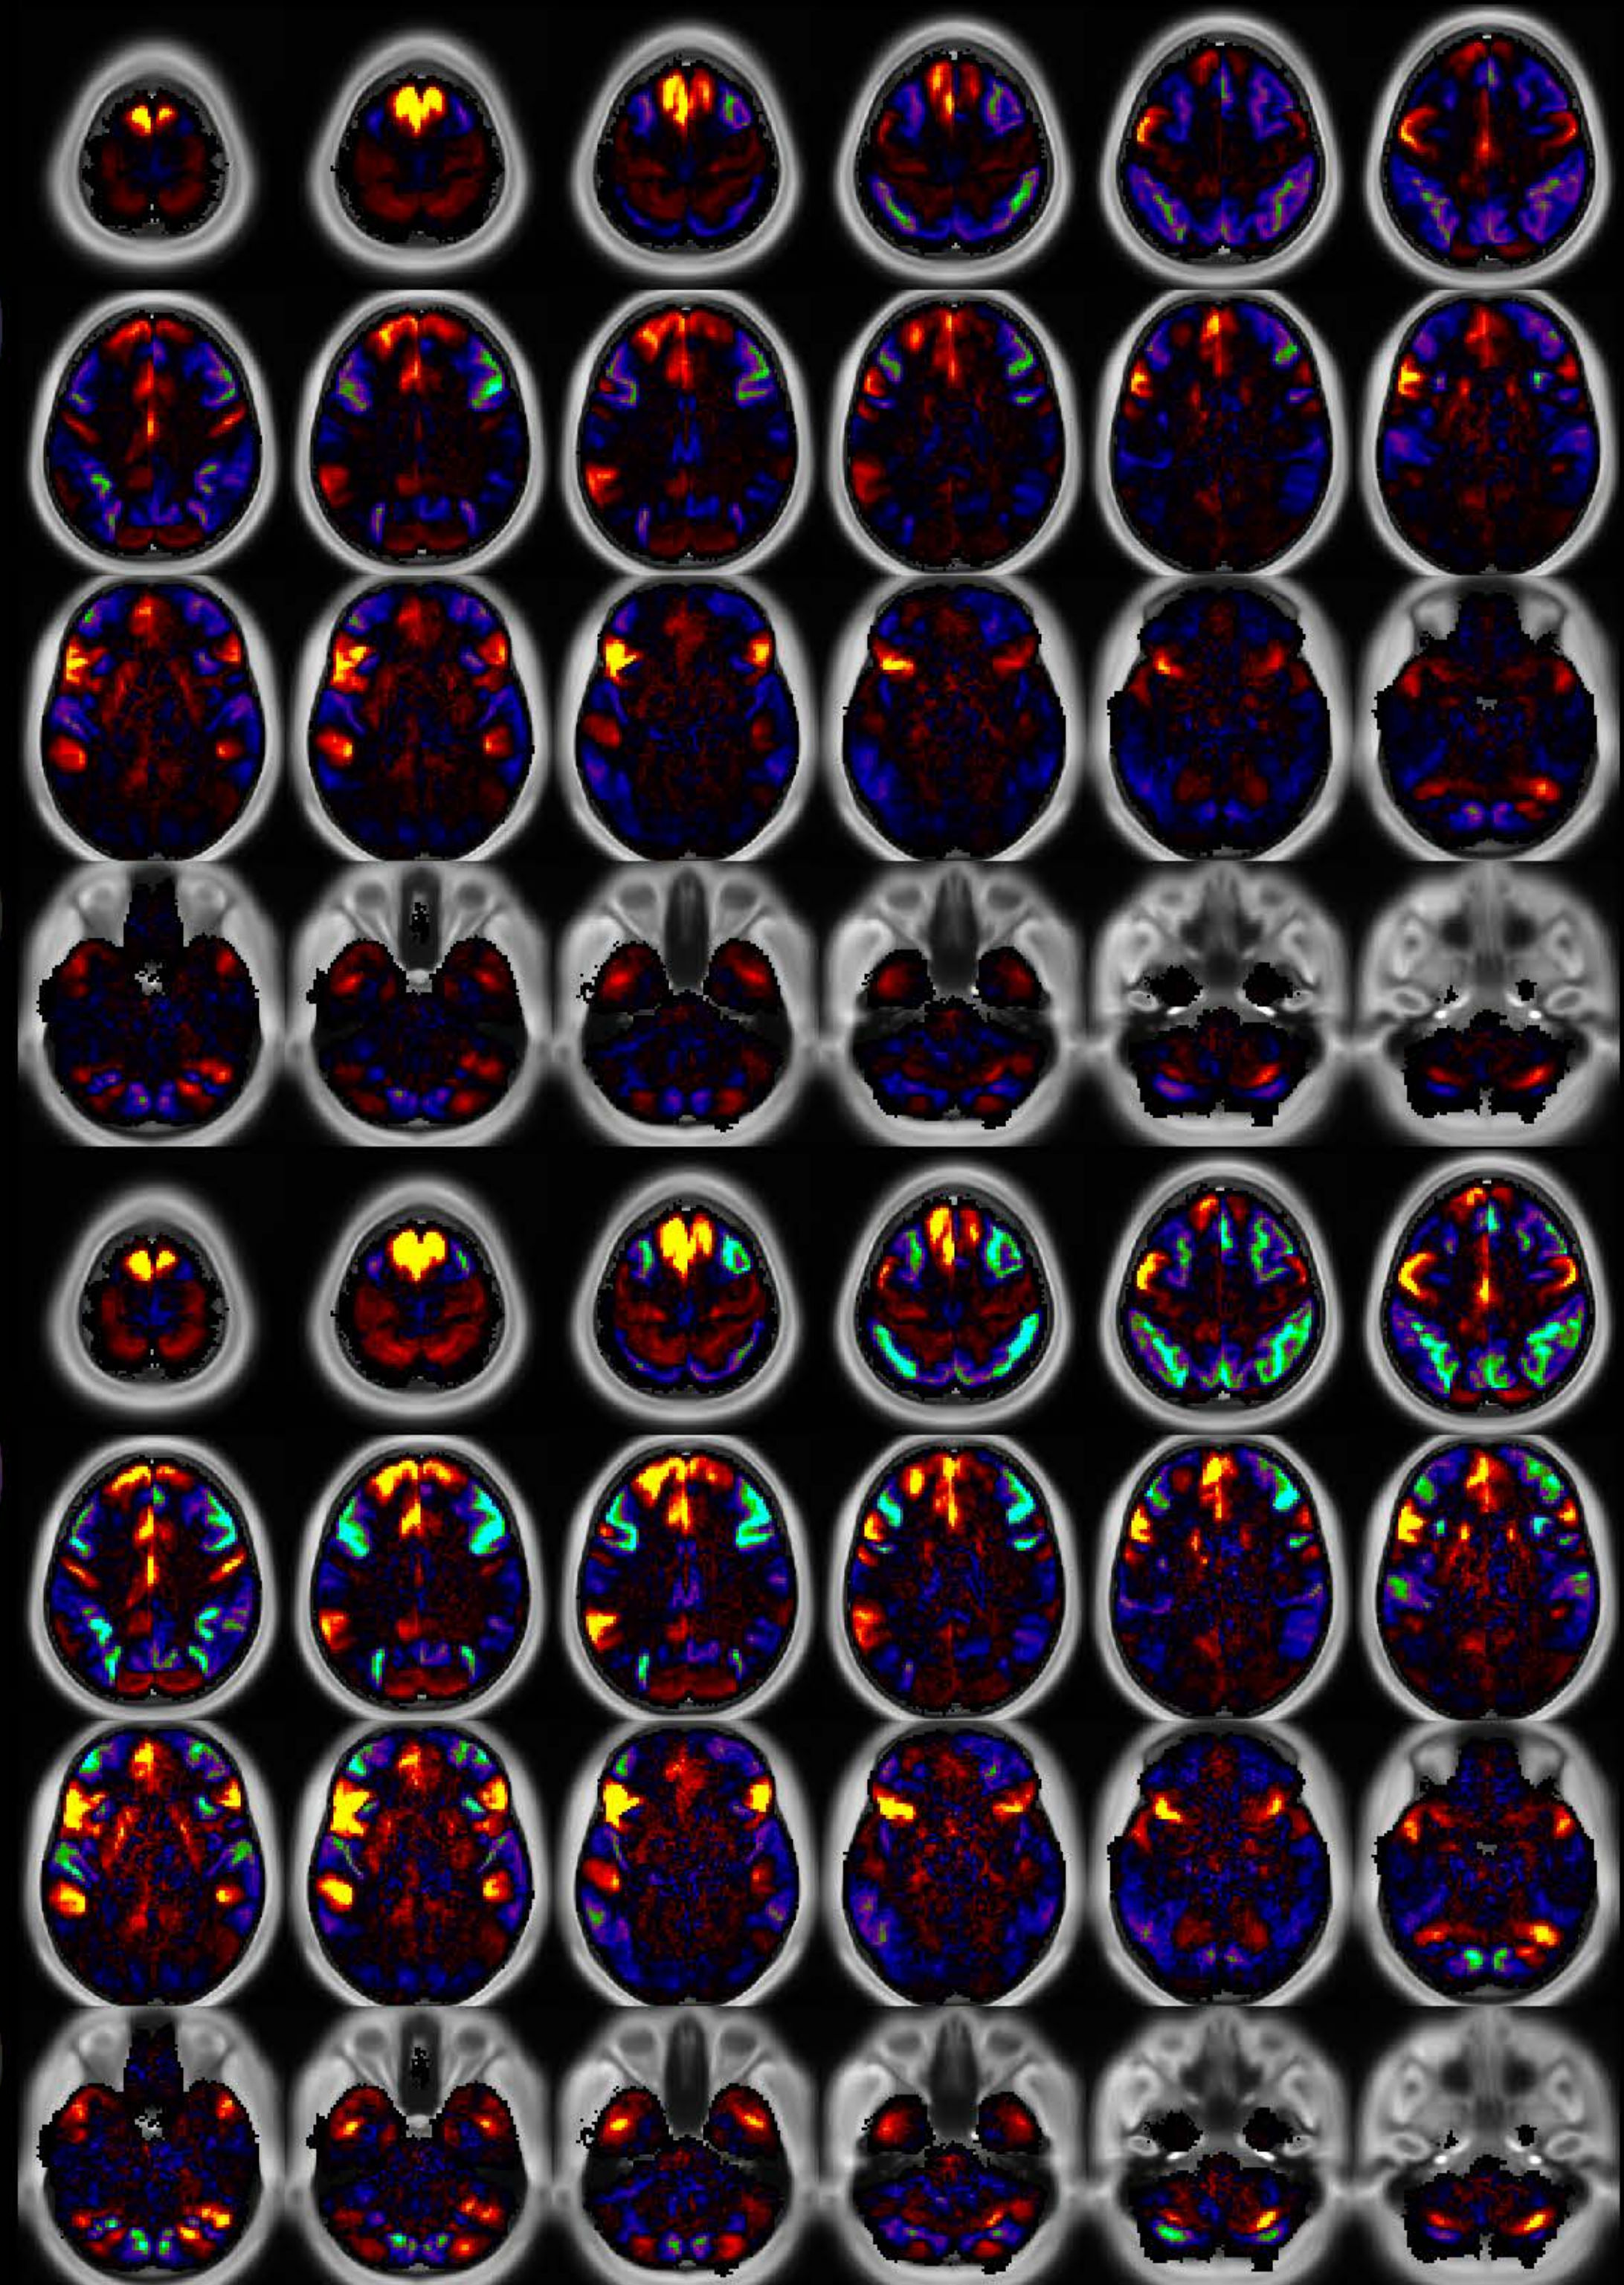

Seconds

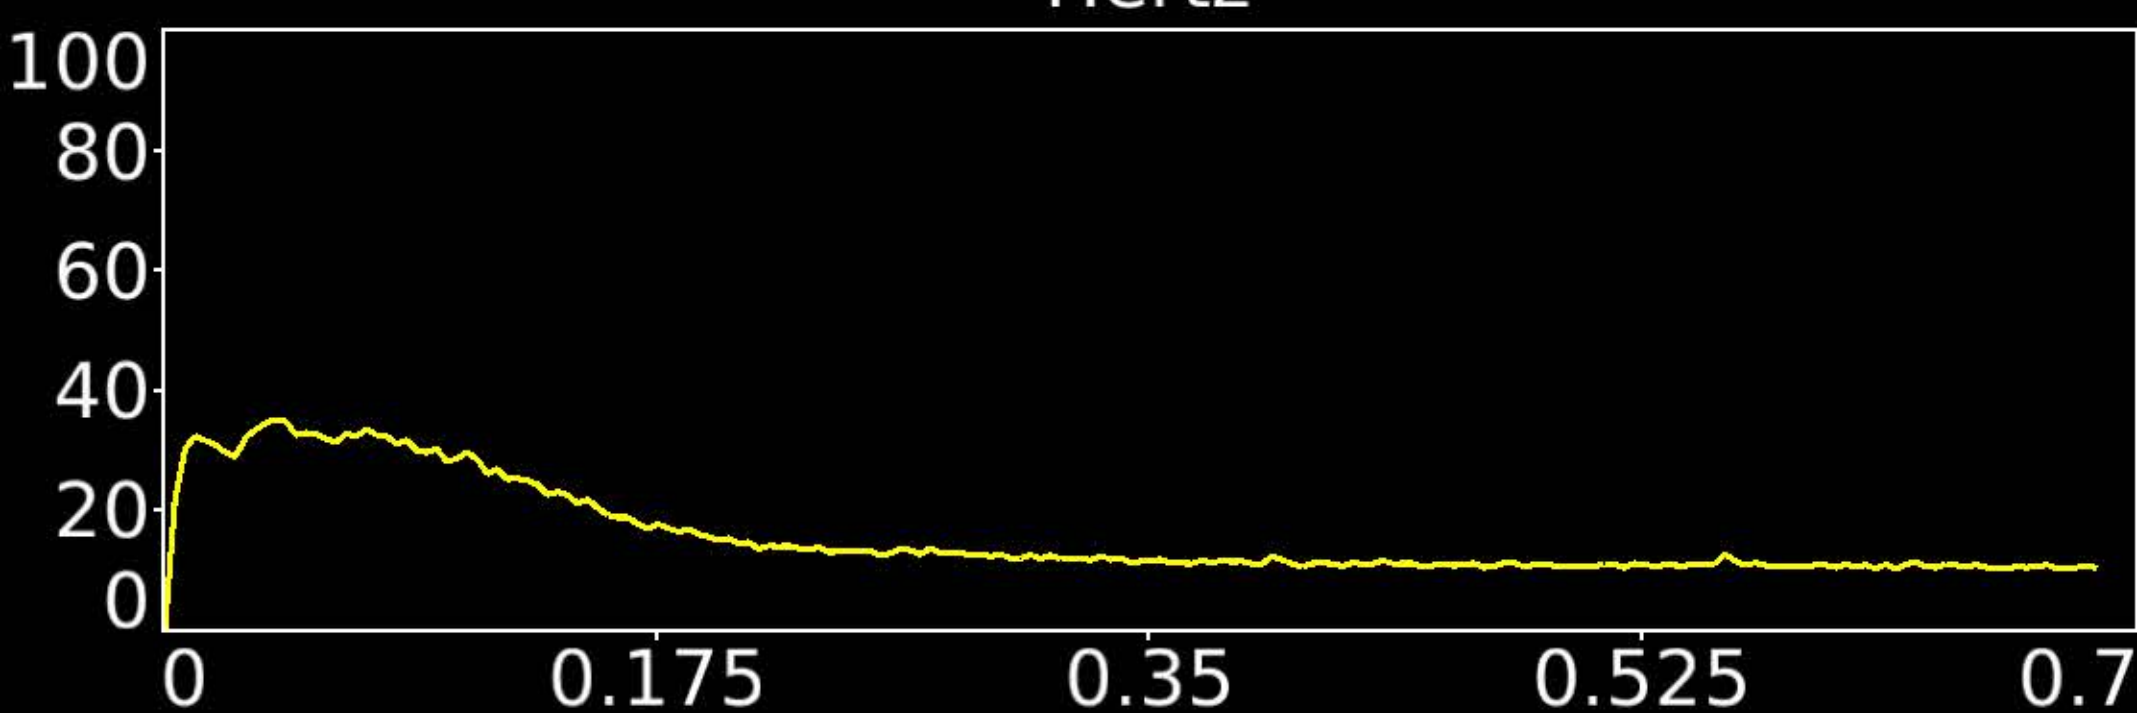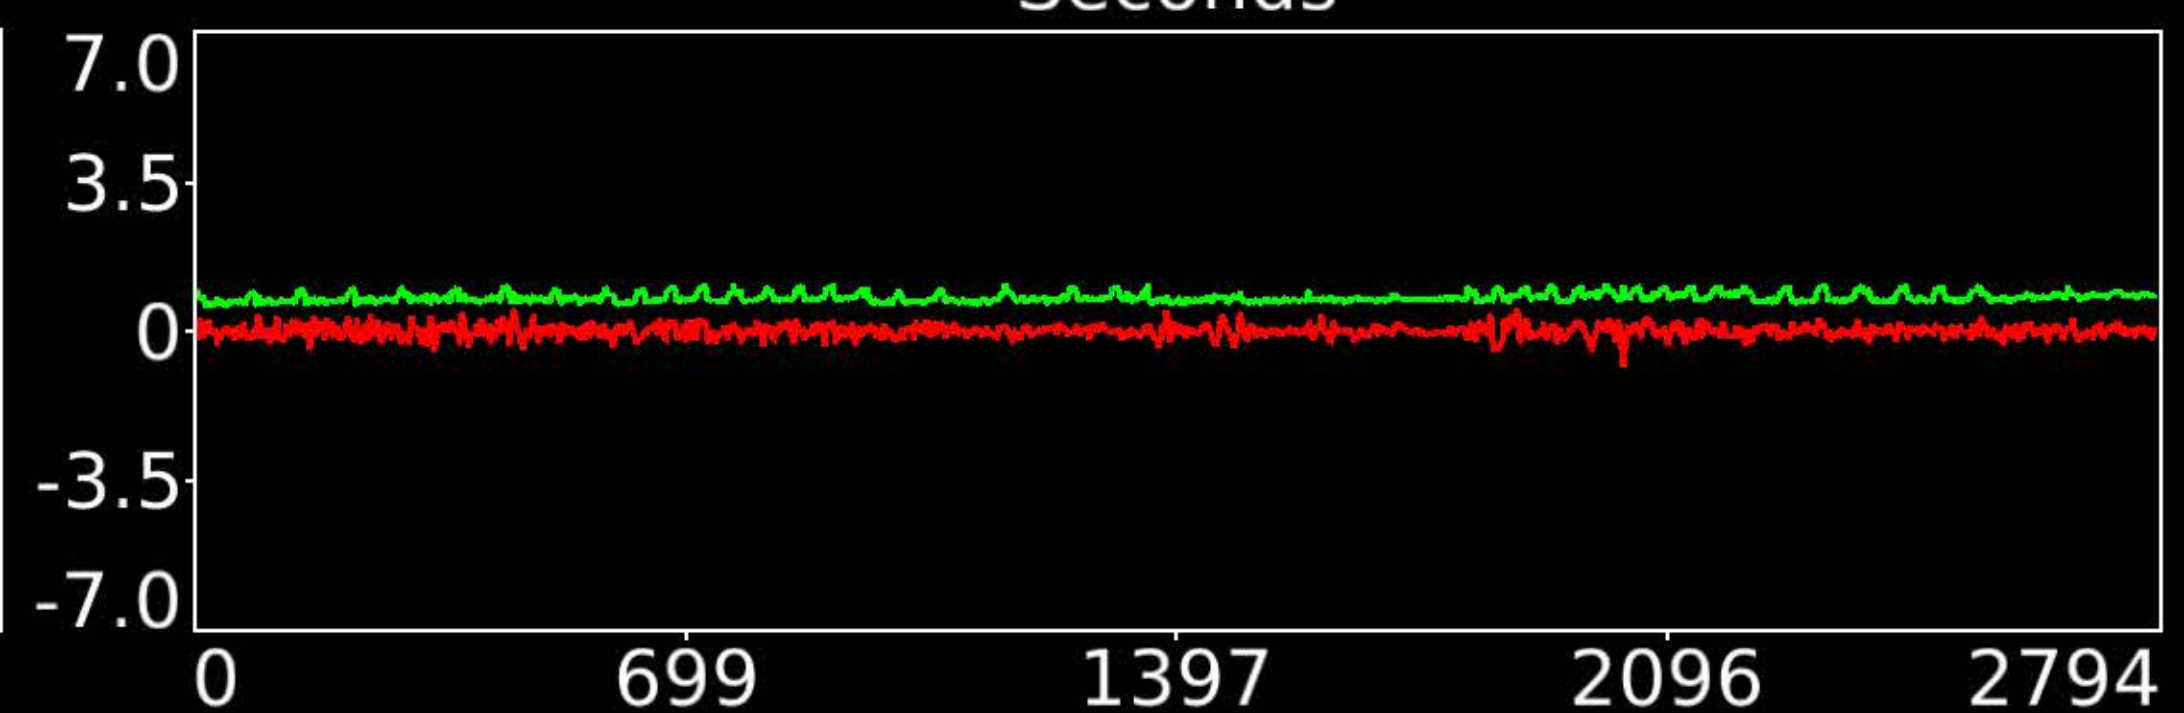

|                           |                            |                                         |  |
|---------------------------|----------------------------|-----------------------------------------|--|
| Number & Class: 30 Signal |                            | Name: Left Lateralized Language Network |  |
| RVT Correlated: No        | DVARS Dip Associated: No   | Cross-Subject Variable: No              |  |
| Single Subject: No        | % Variance Explained: 1.19 | Globality Index: 0.01                   |  |
| Task Component: 22        | Rest Component: 20         | Task Modulated: No                      |  |

Rationale: Spatial map includes positive and negative patches that respect known RSNs (e.g. Language Network and areal boundaries (44; 45; 55b; PSL; SFL)



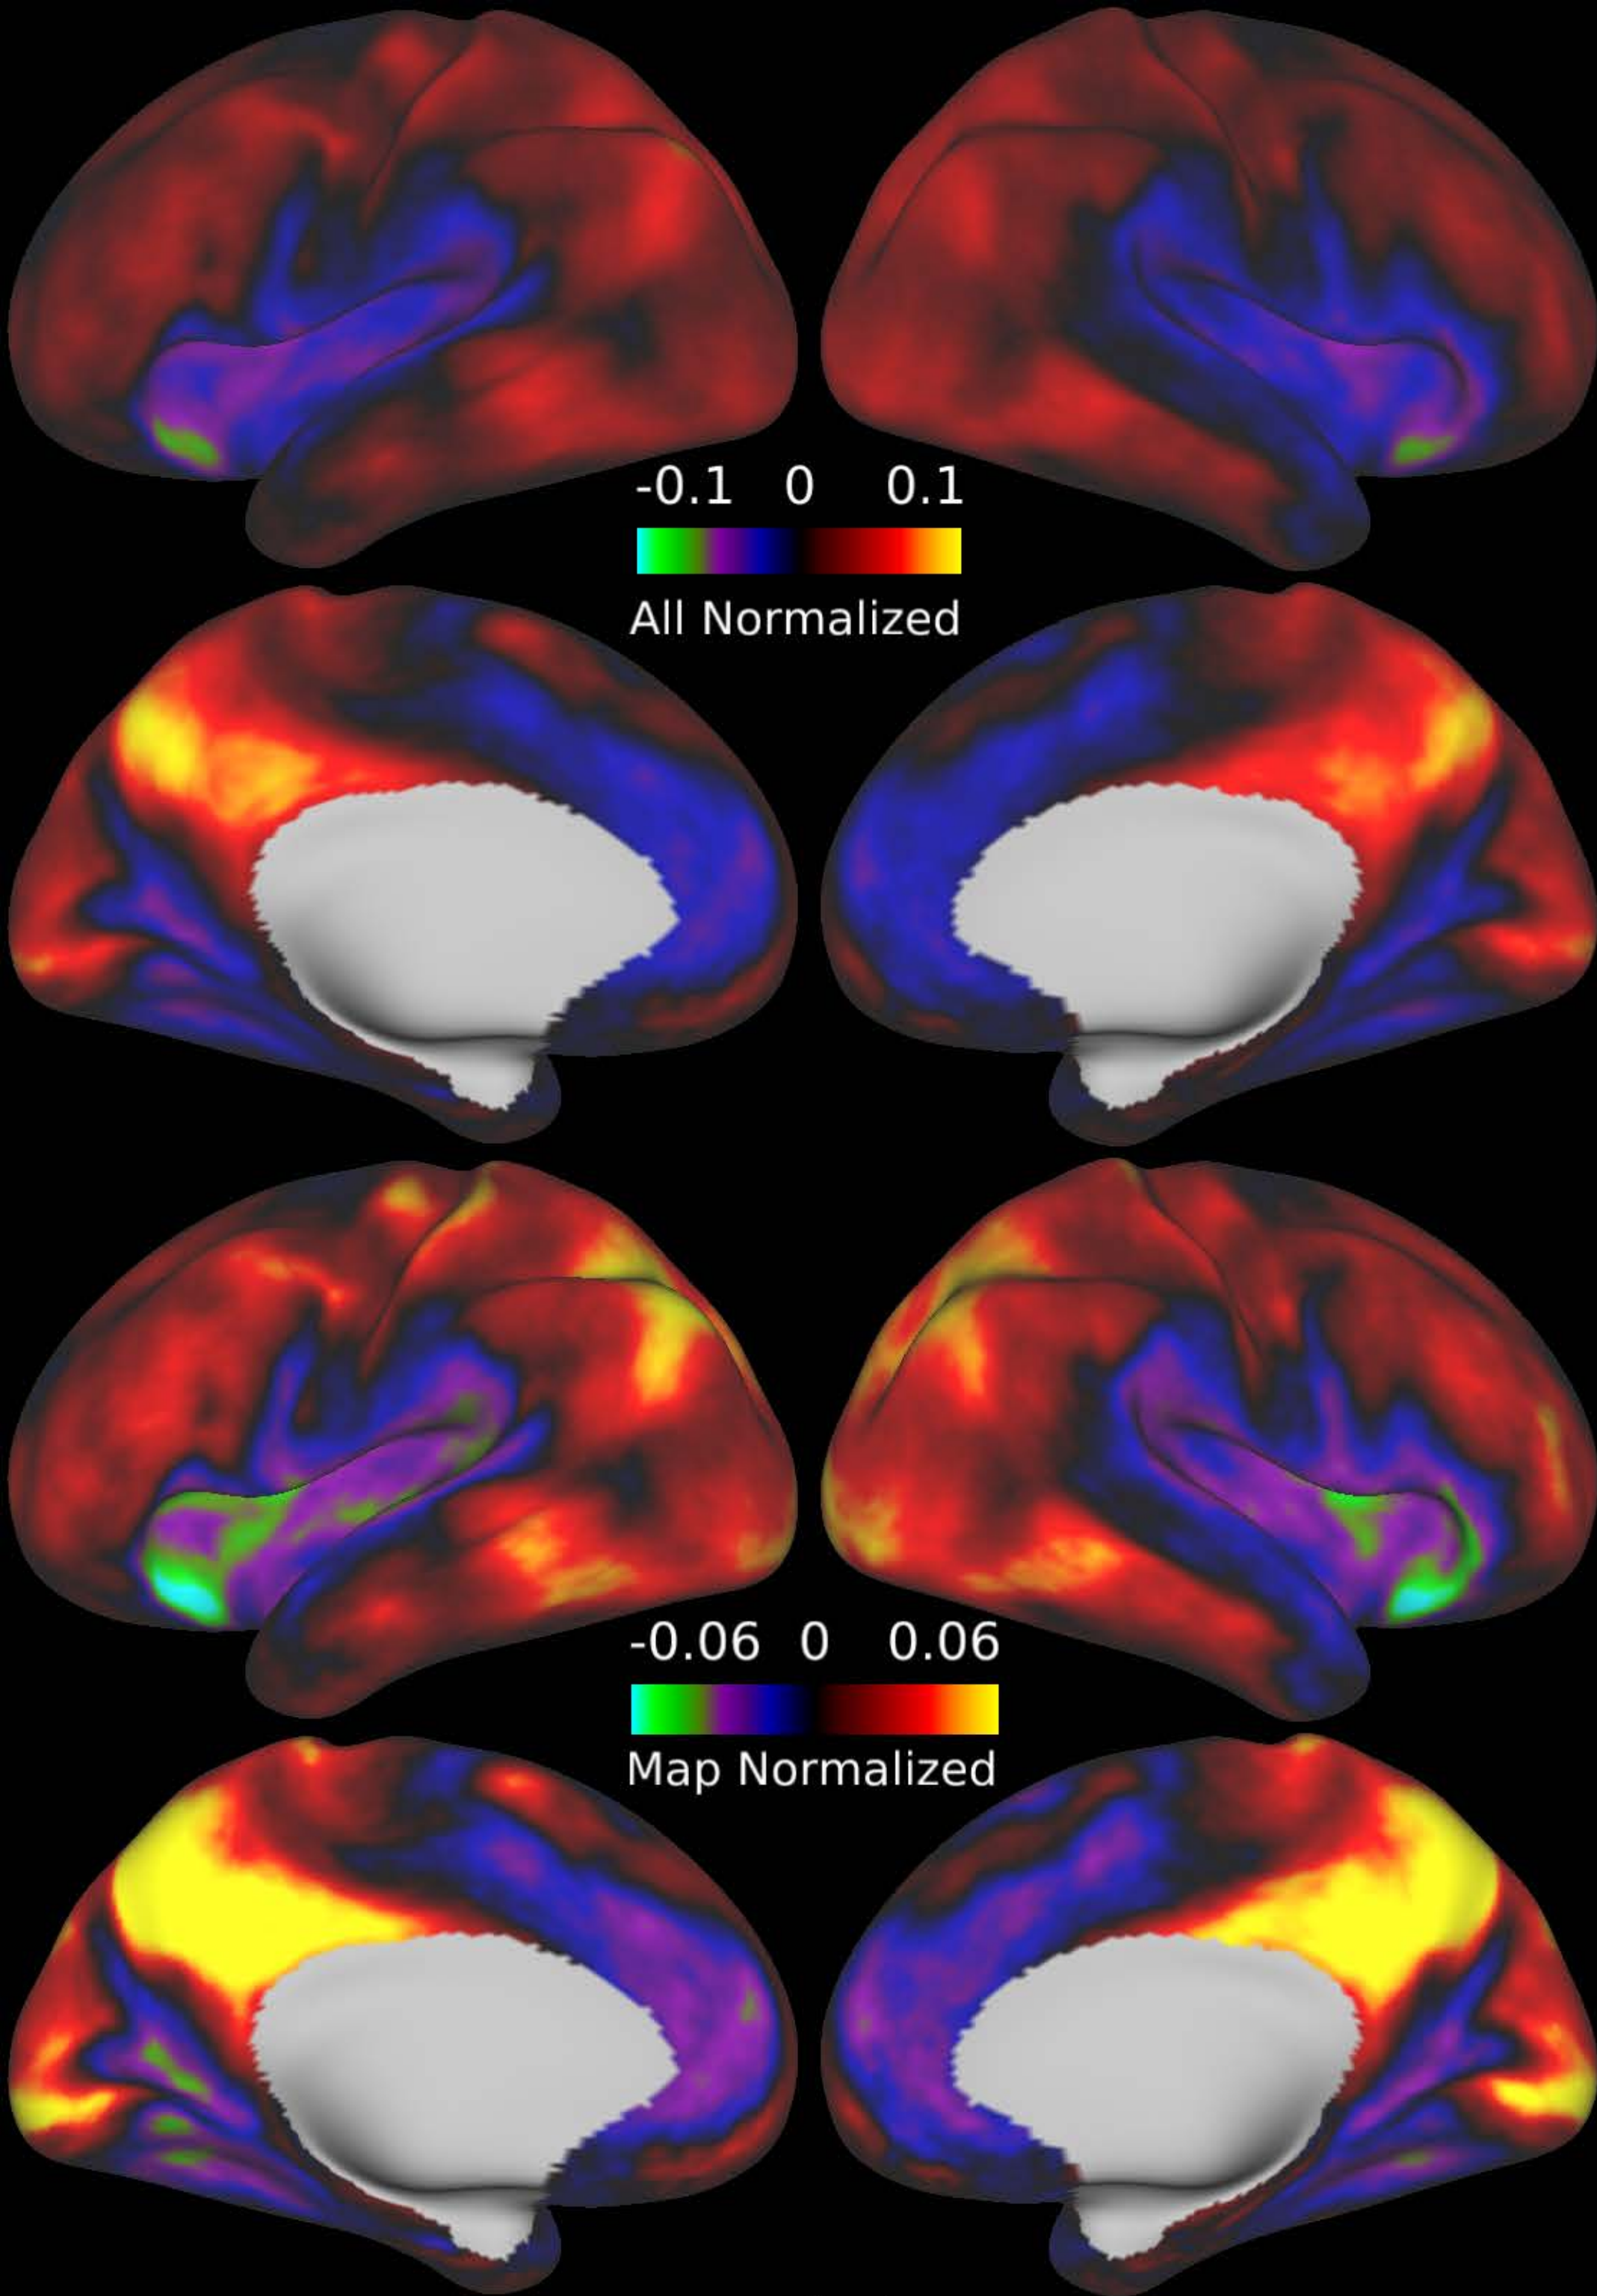

Hertz

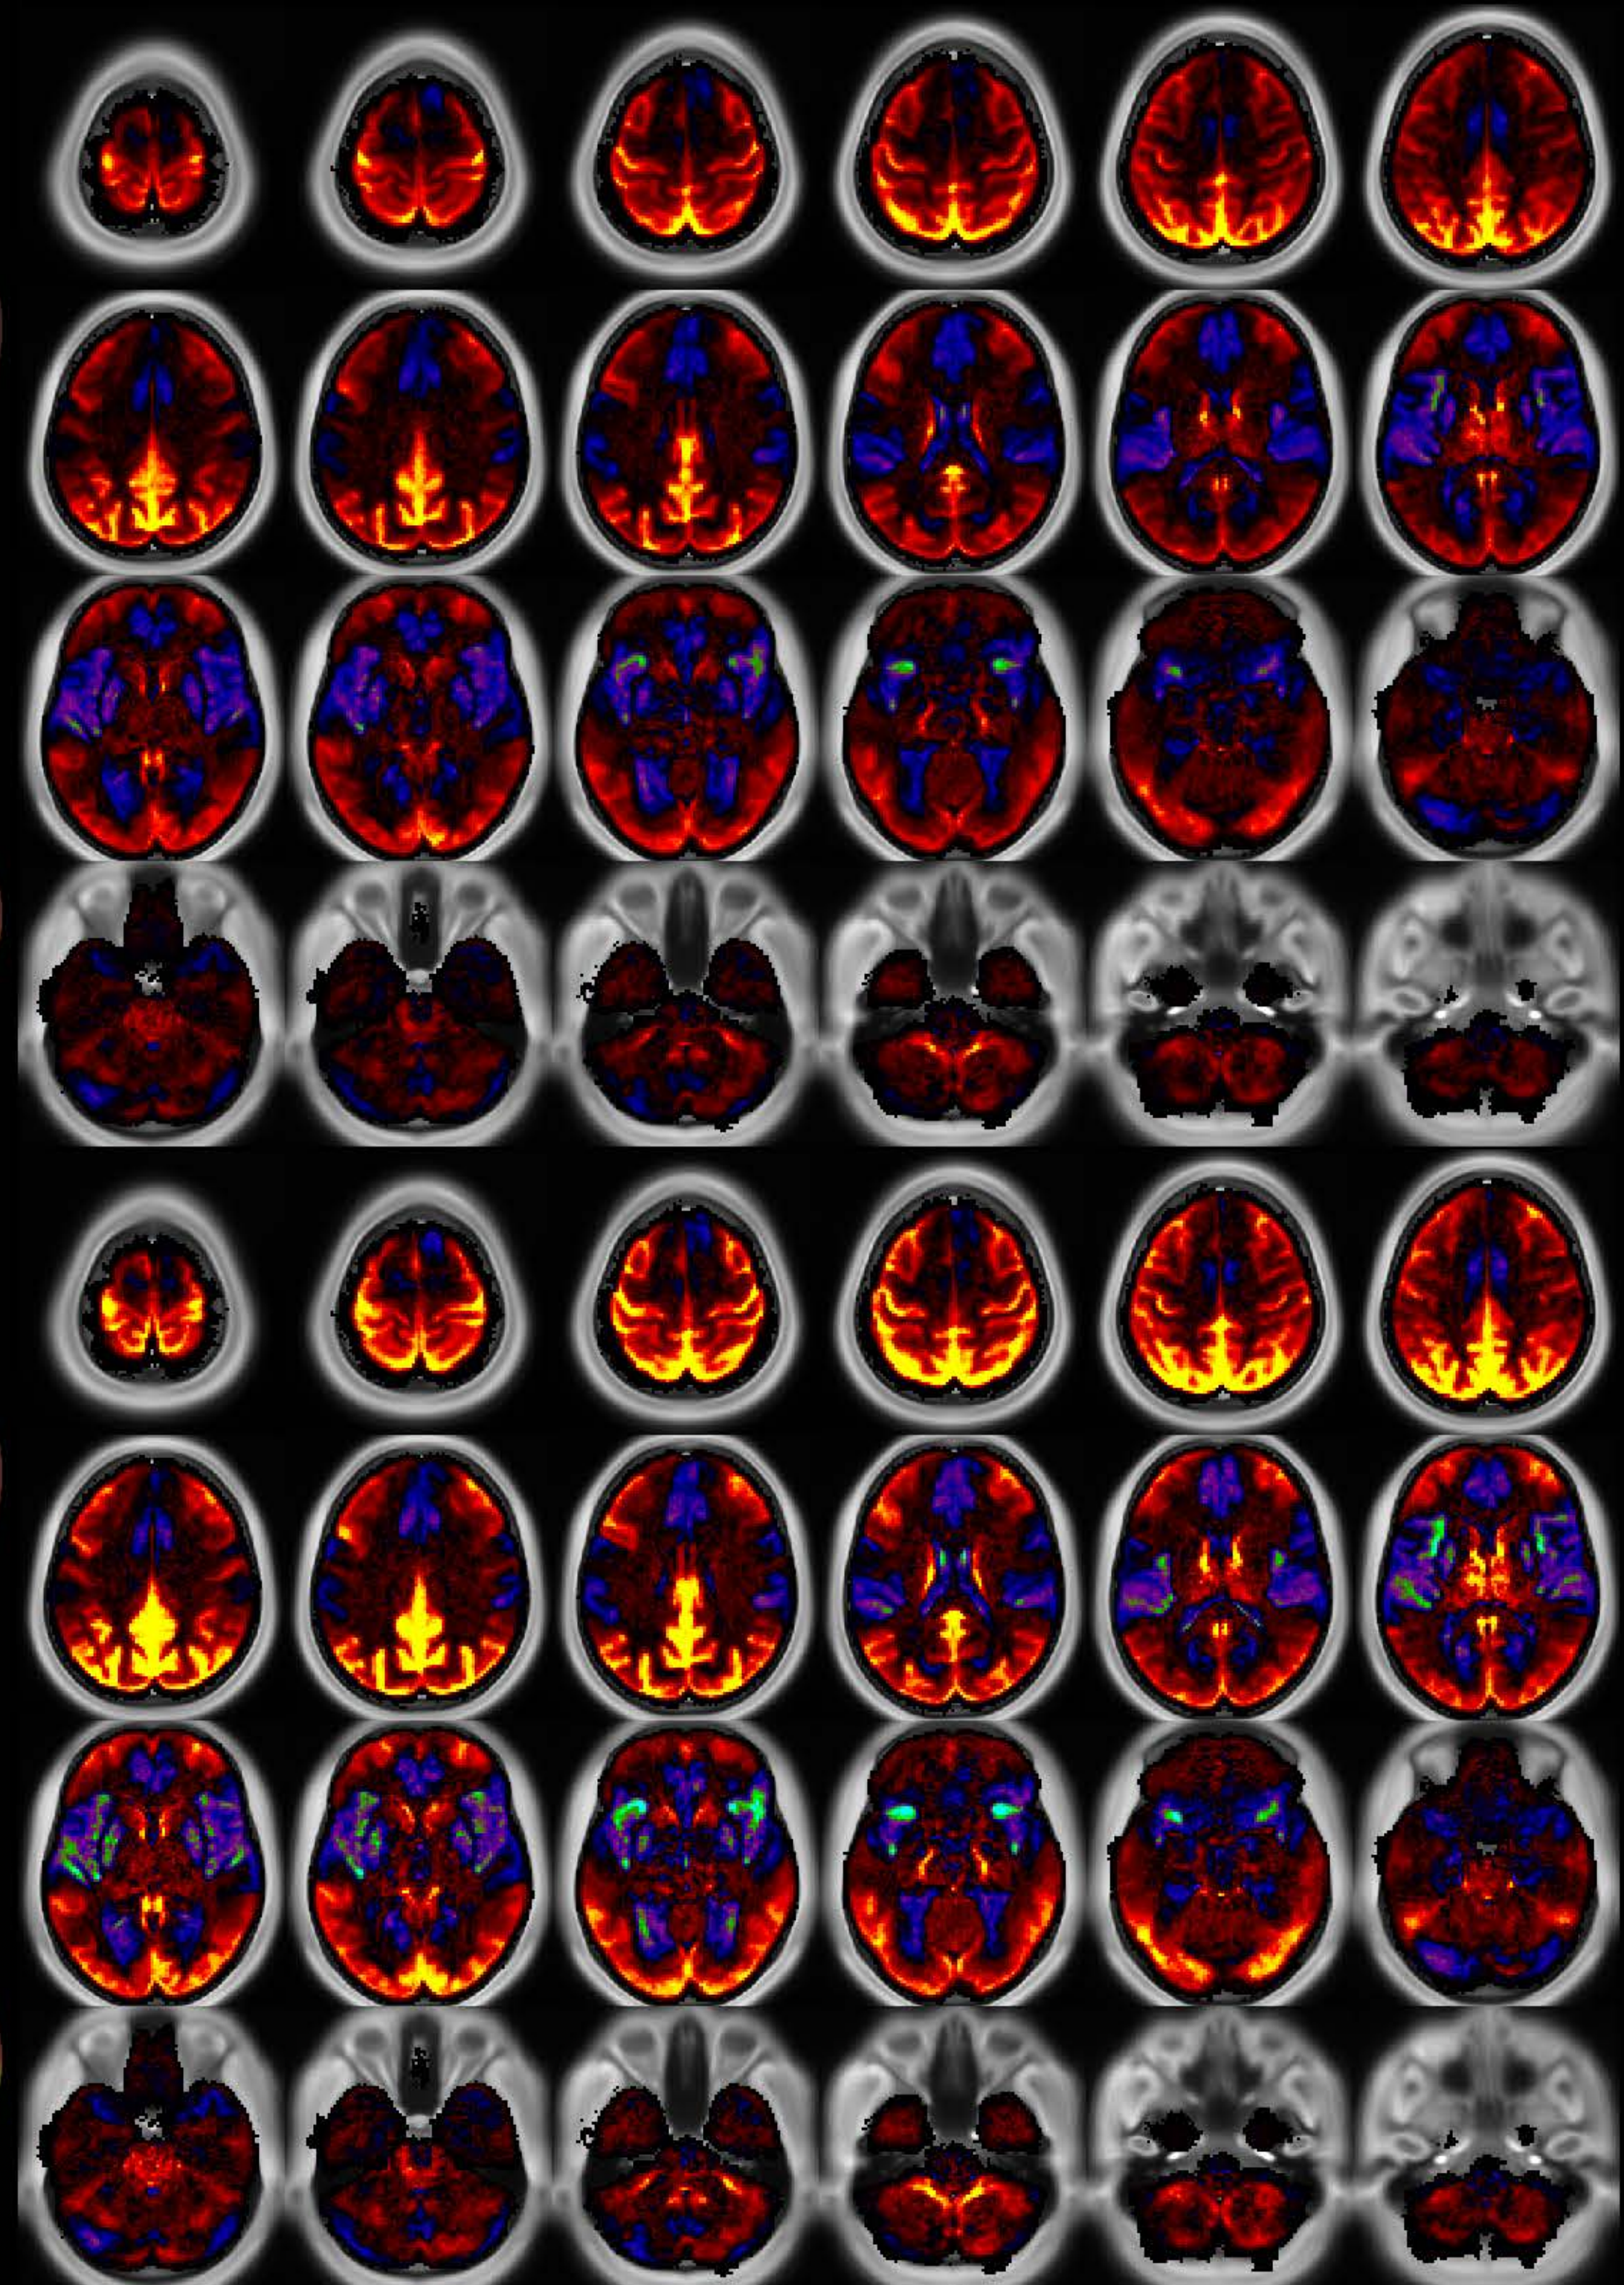

Seconds

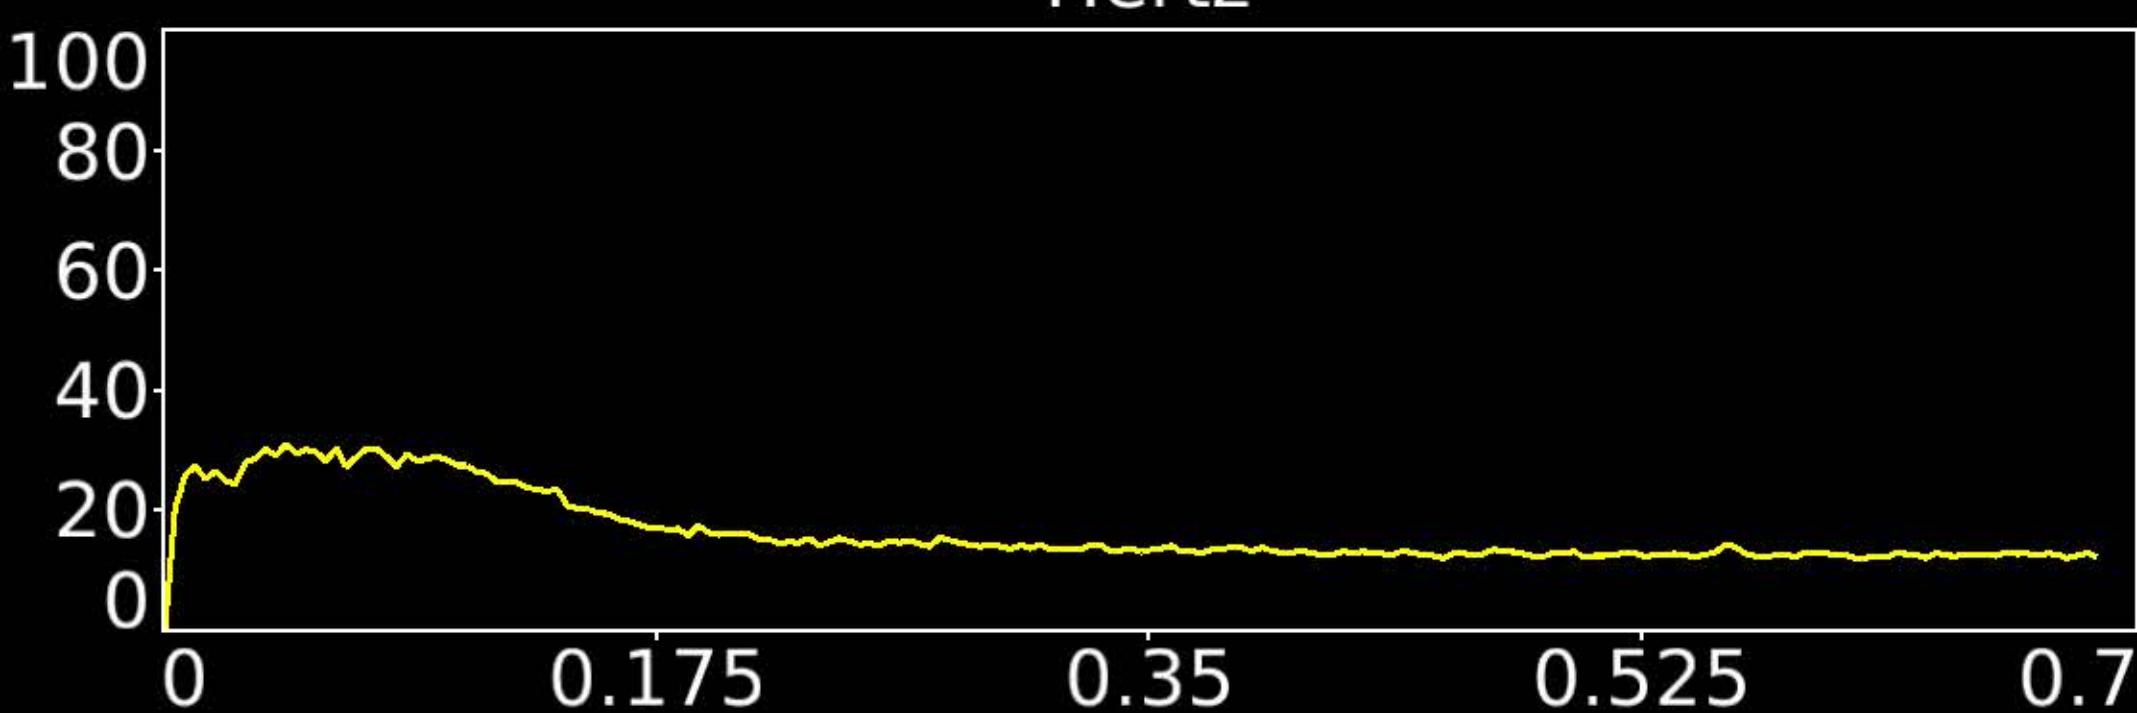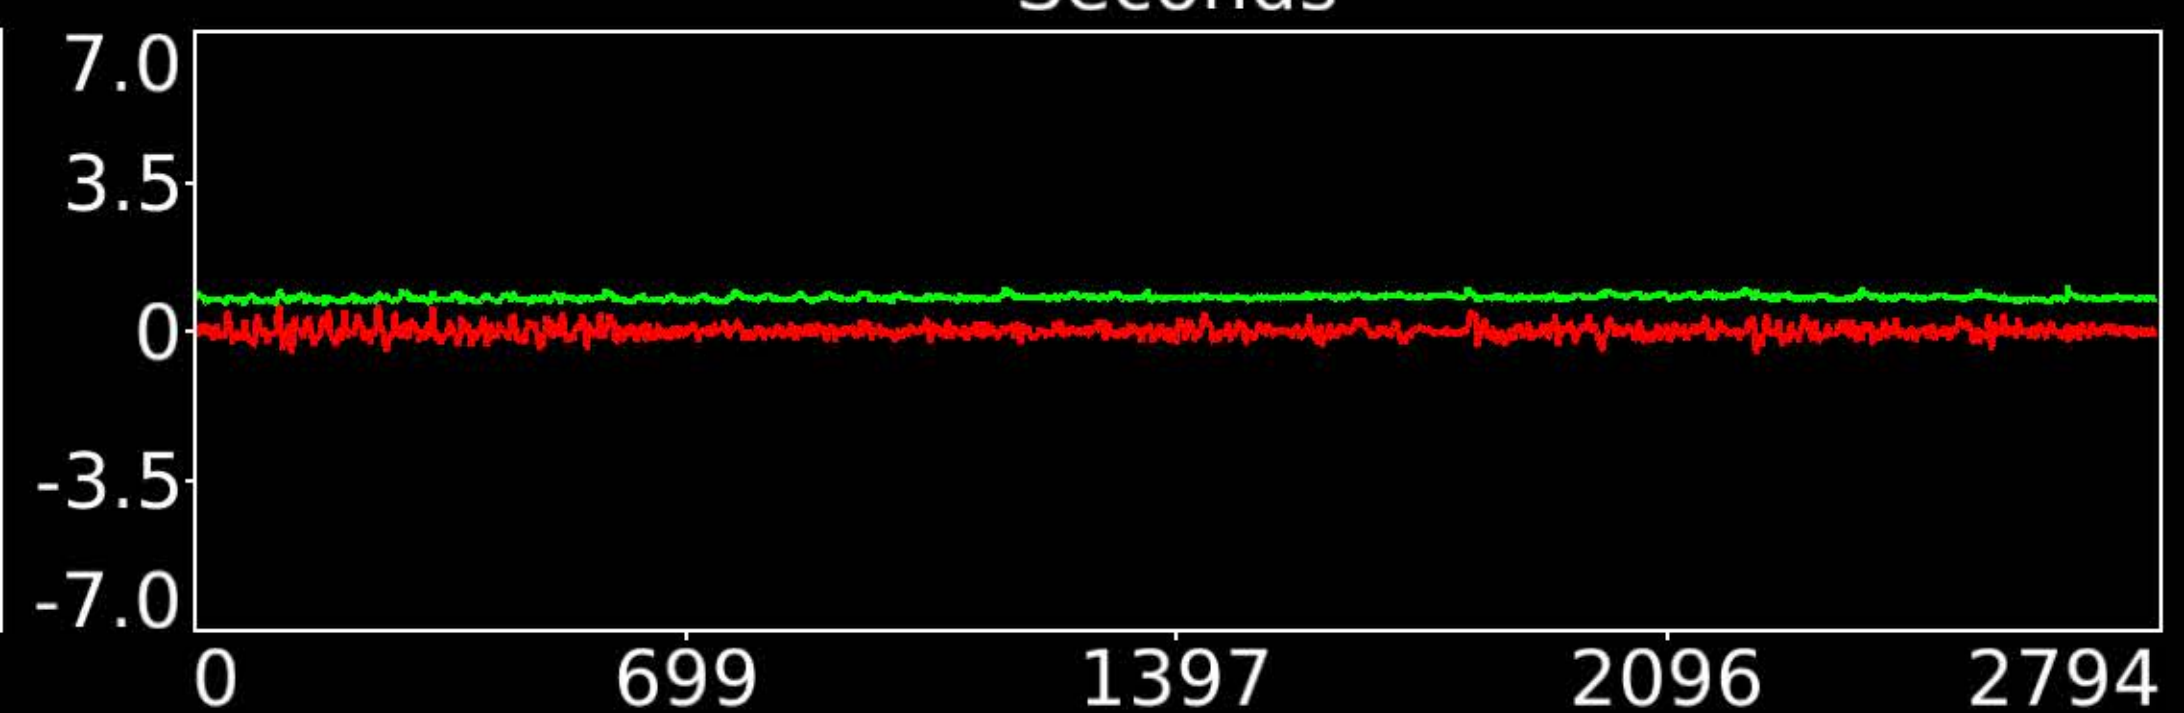

|                          |                            |                                       |  |
|--------------------------|----------------------------|---------------------------------------|--|
| Number & Class: 31 Noise |                            | Name: Semi-Global Physiological BOLD? |  |
| RVT Correlated: No       | DVARS Dip Associated: No   | Cross-Subject Variable: No            |  |
| Single Subject: Yes      | % Variance Explained: 1.19 | Globality Index: 1.21                 |  |
| Task Component: 30       | Rest Component: 25         | Task Modulated: No                    |  |

Rationale: Controversial: Bears some resemblance to RC25 and TC30; positive and negative patches do not clearly reflect RSNs or areal borders



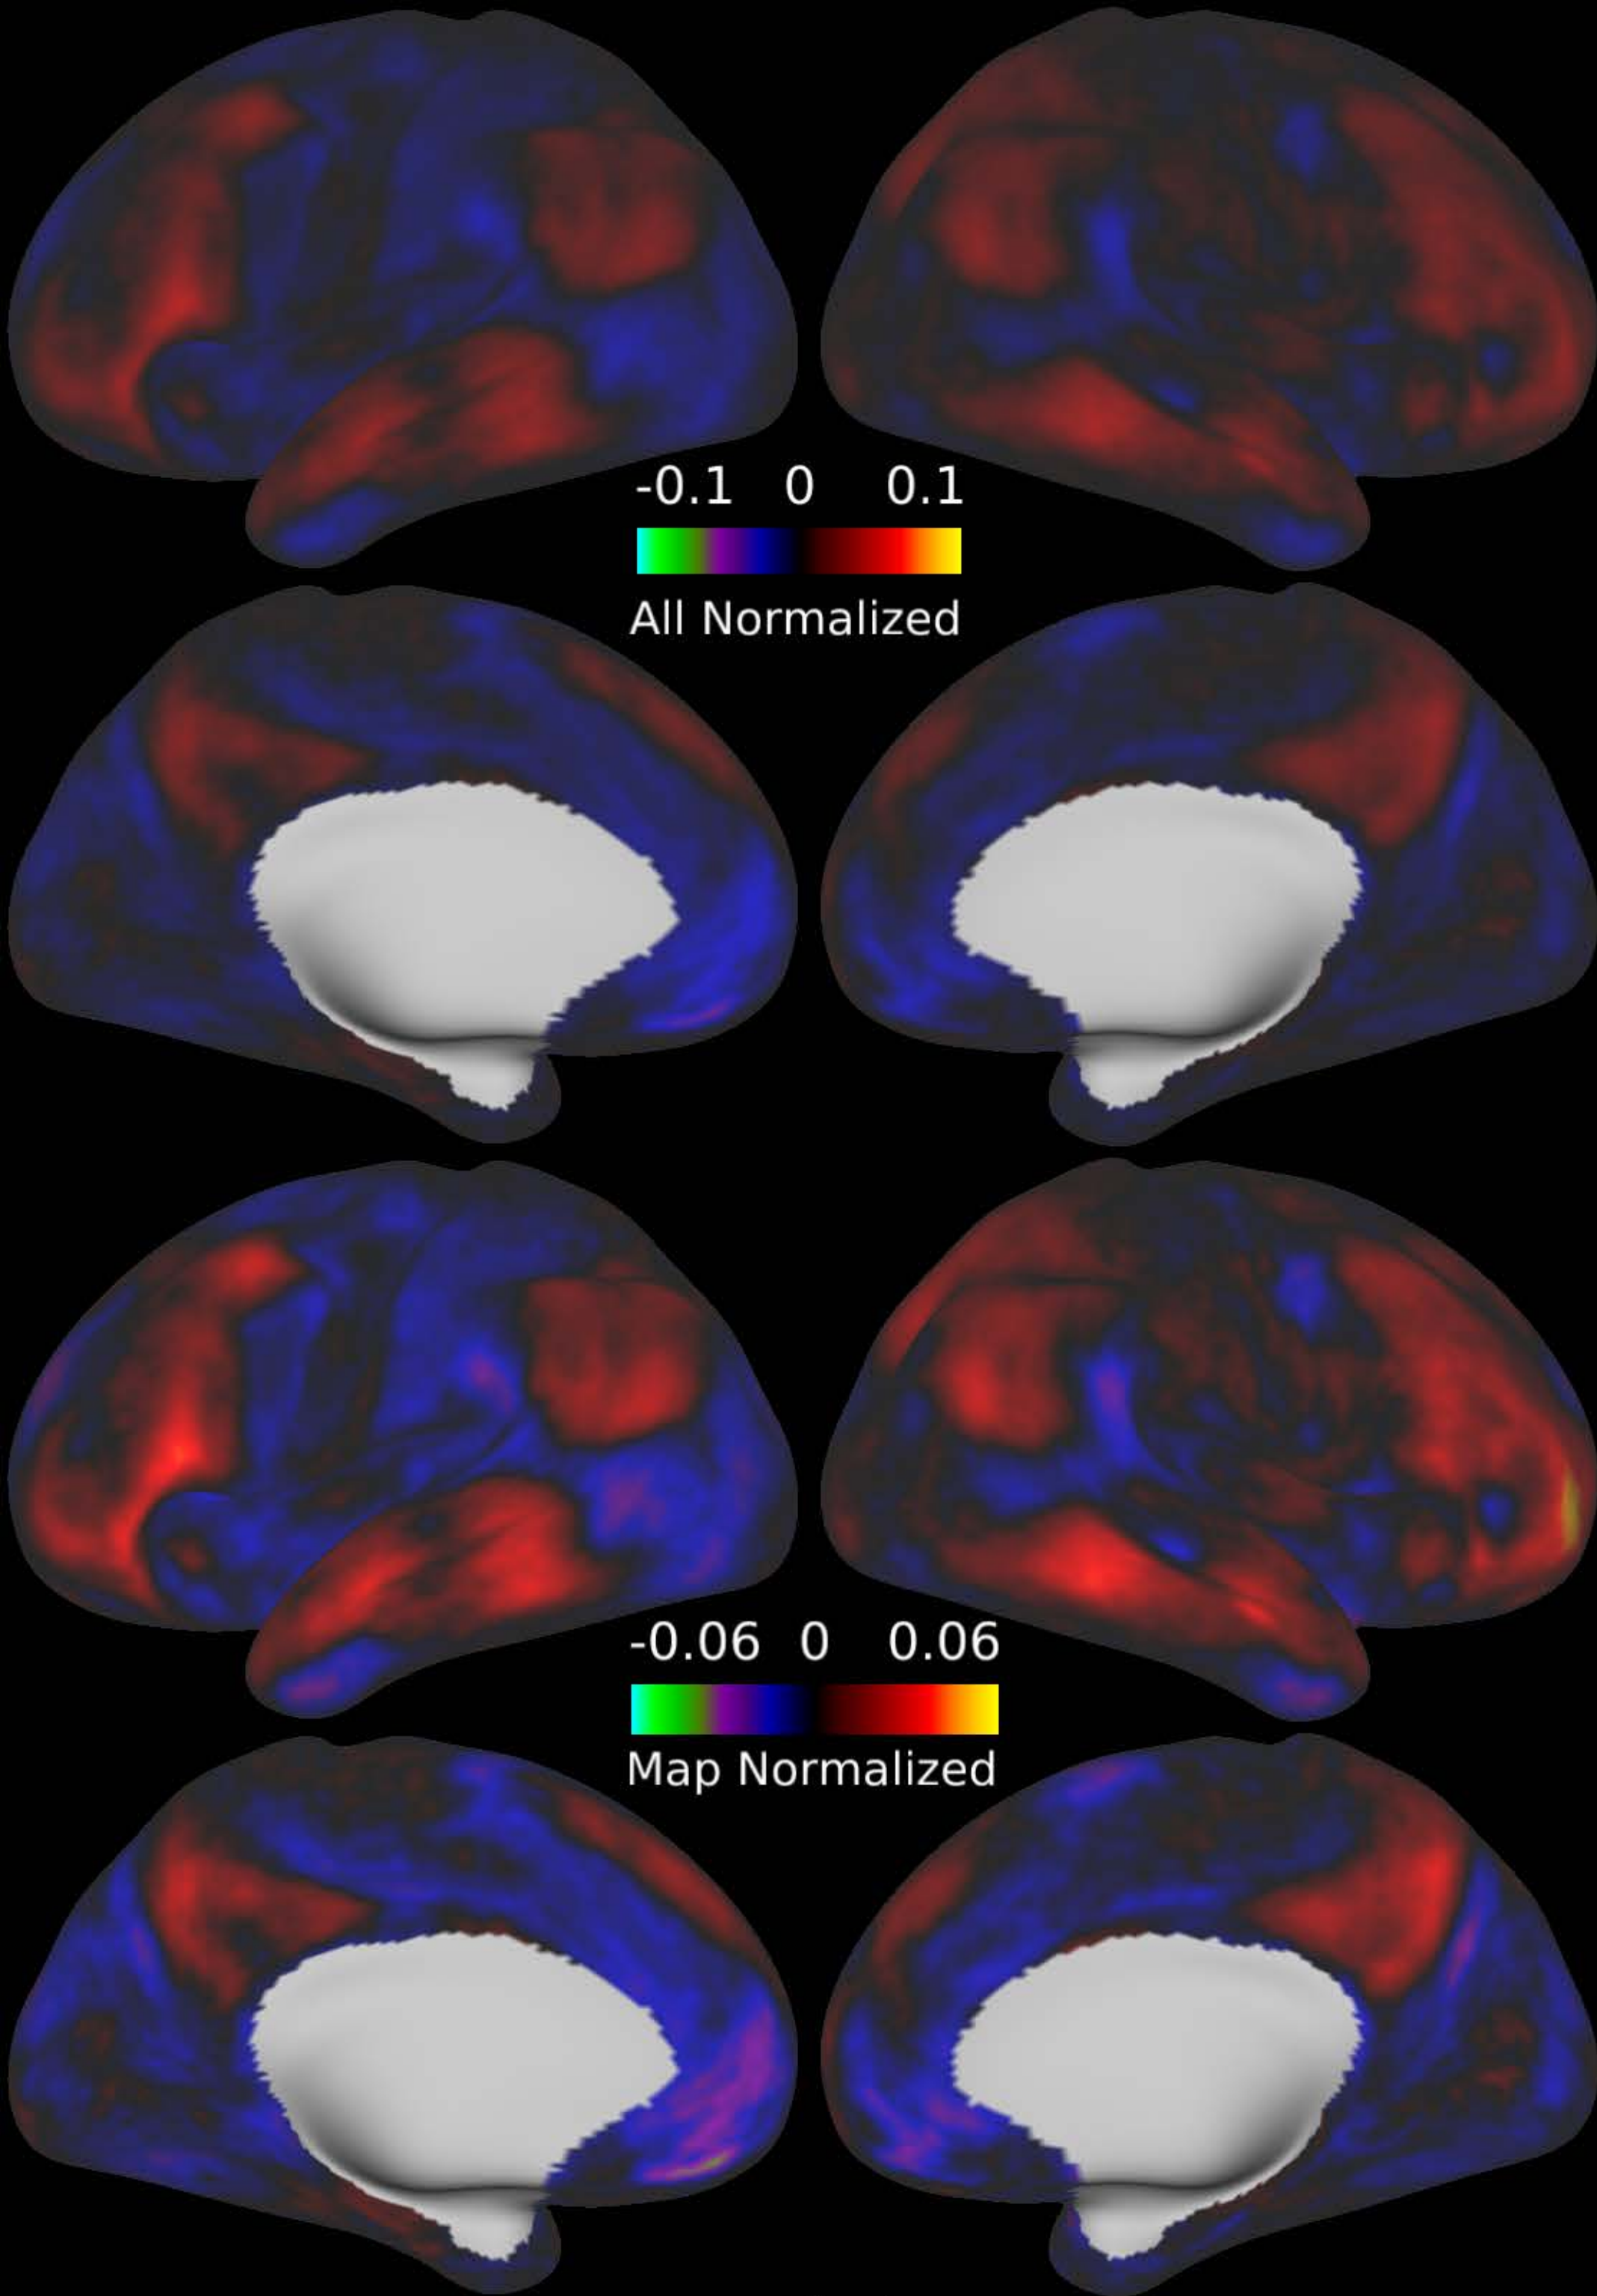

Hertz

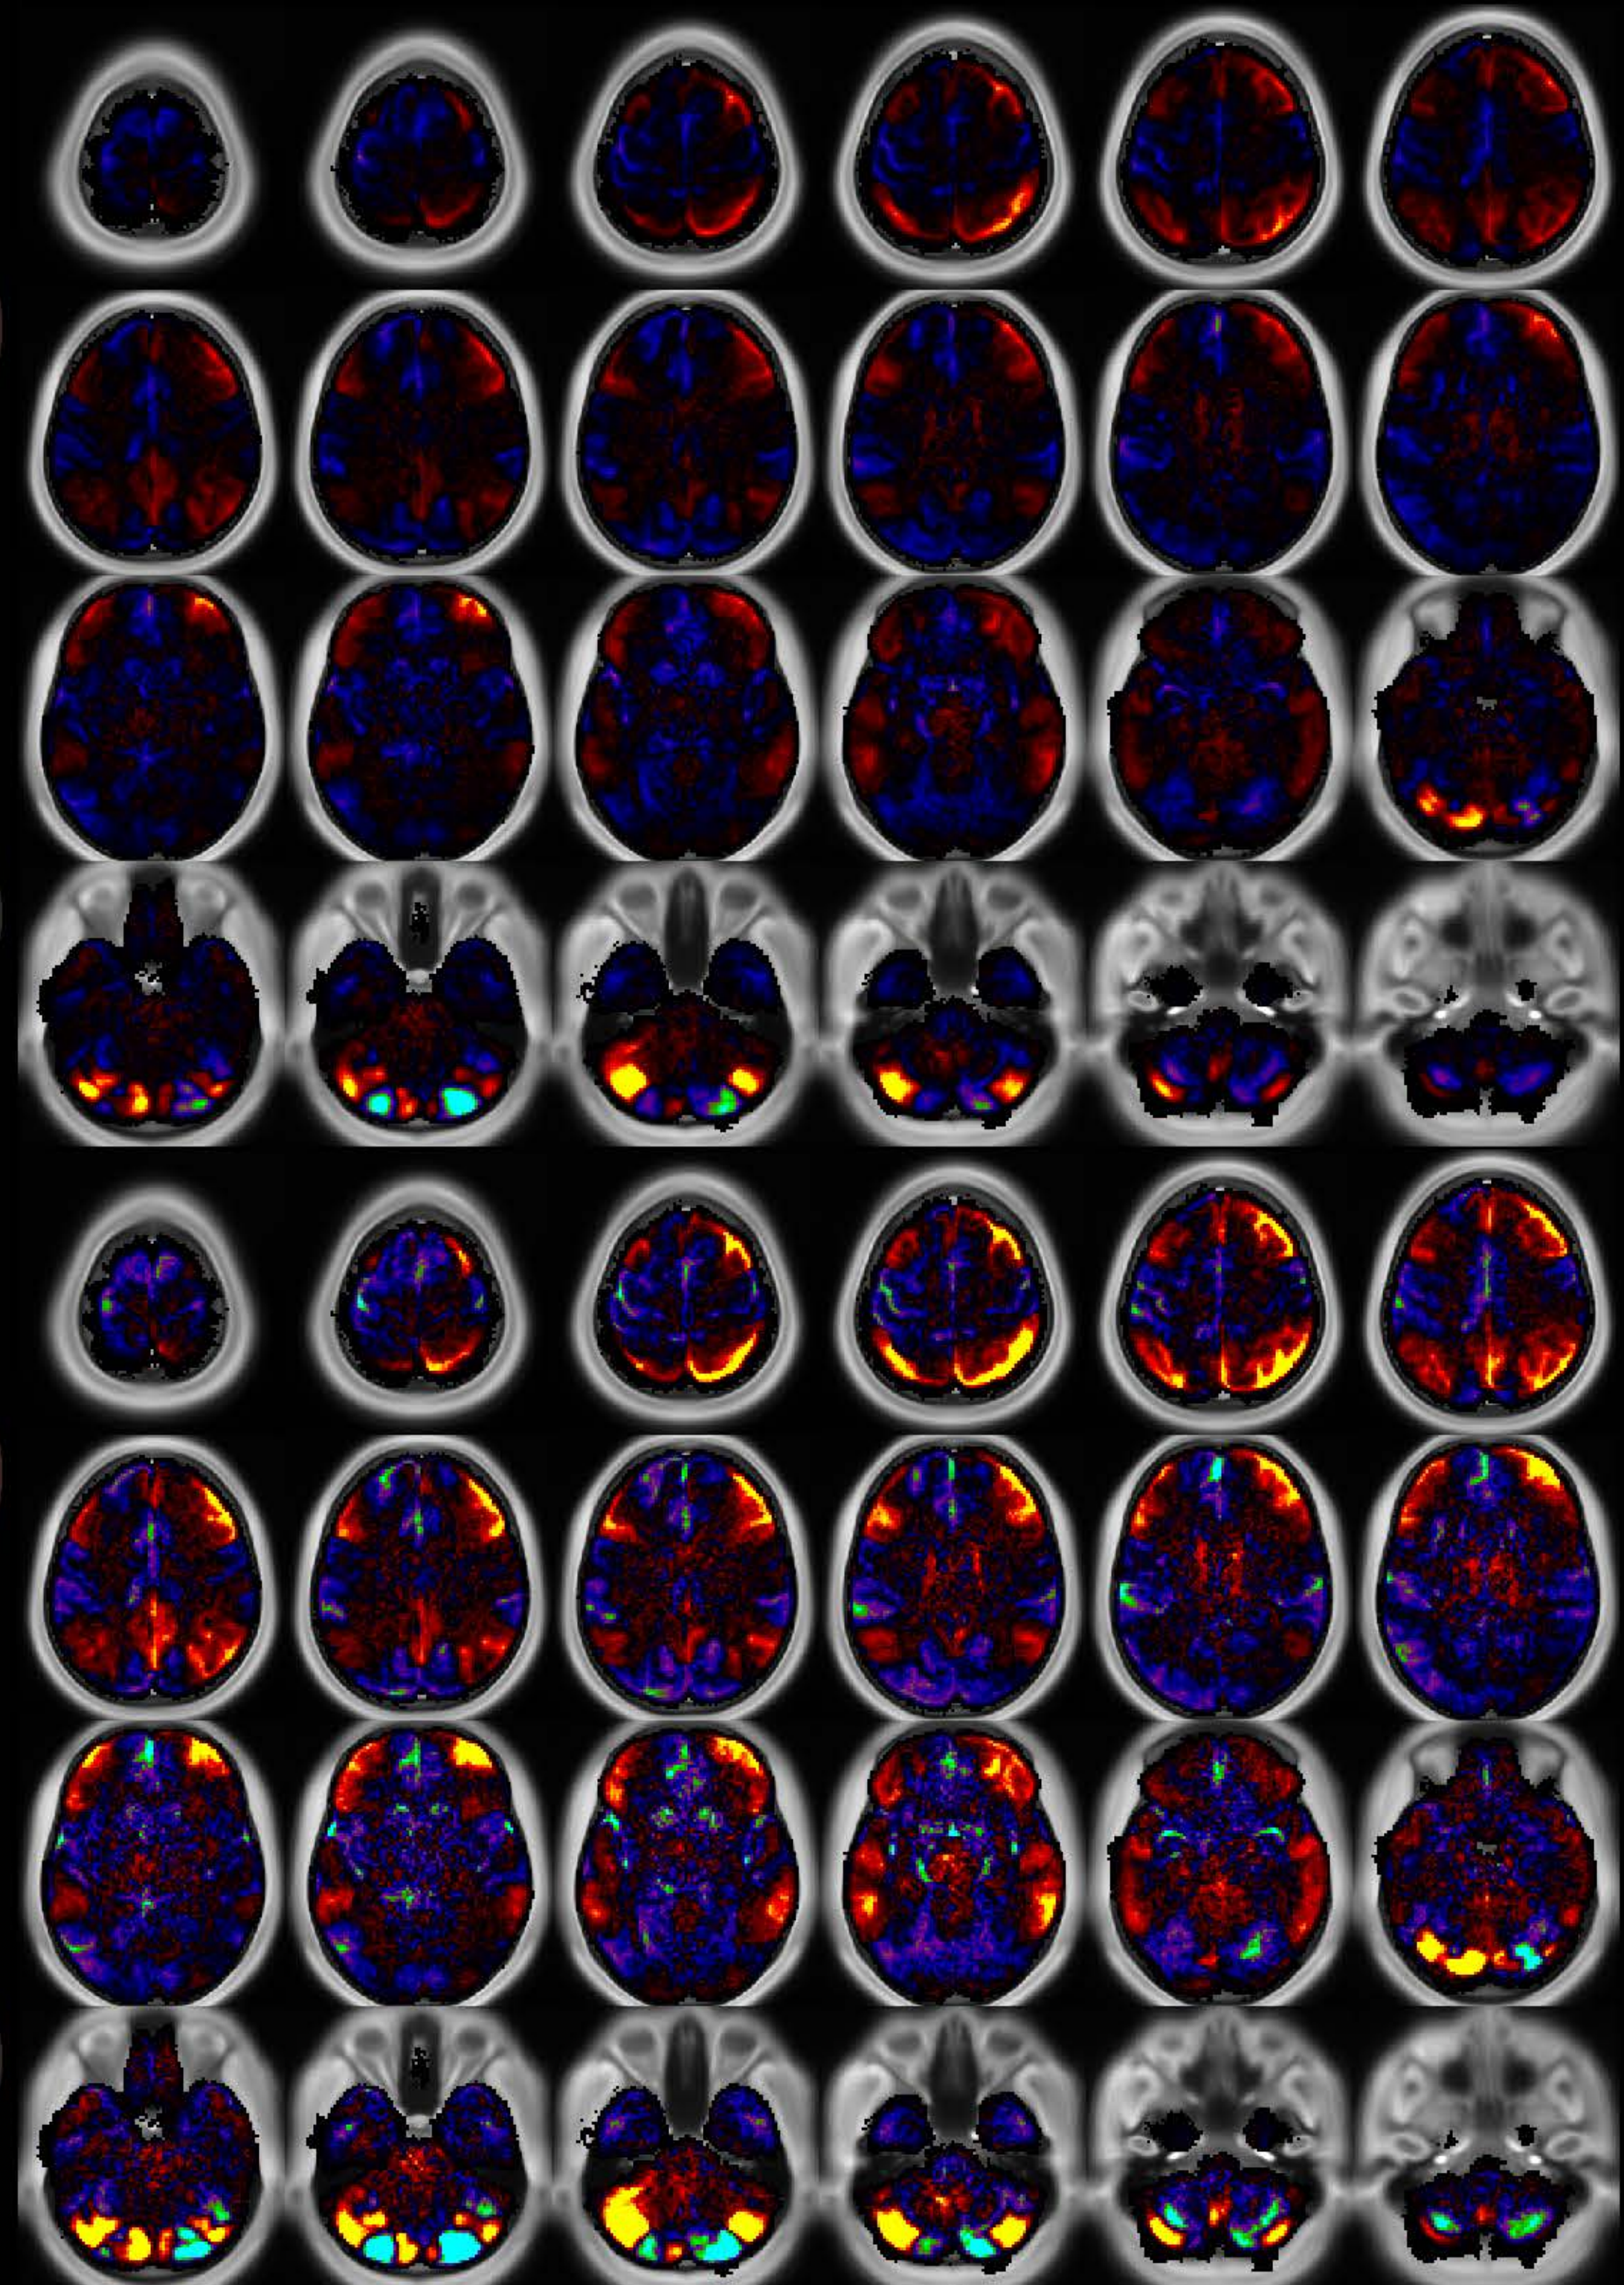

Seconds

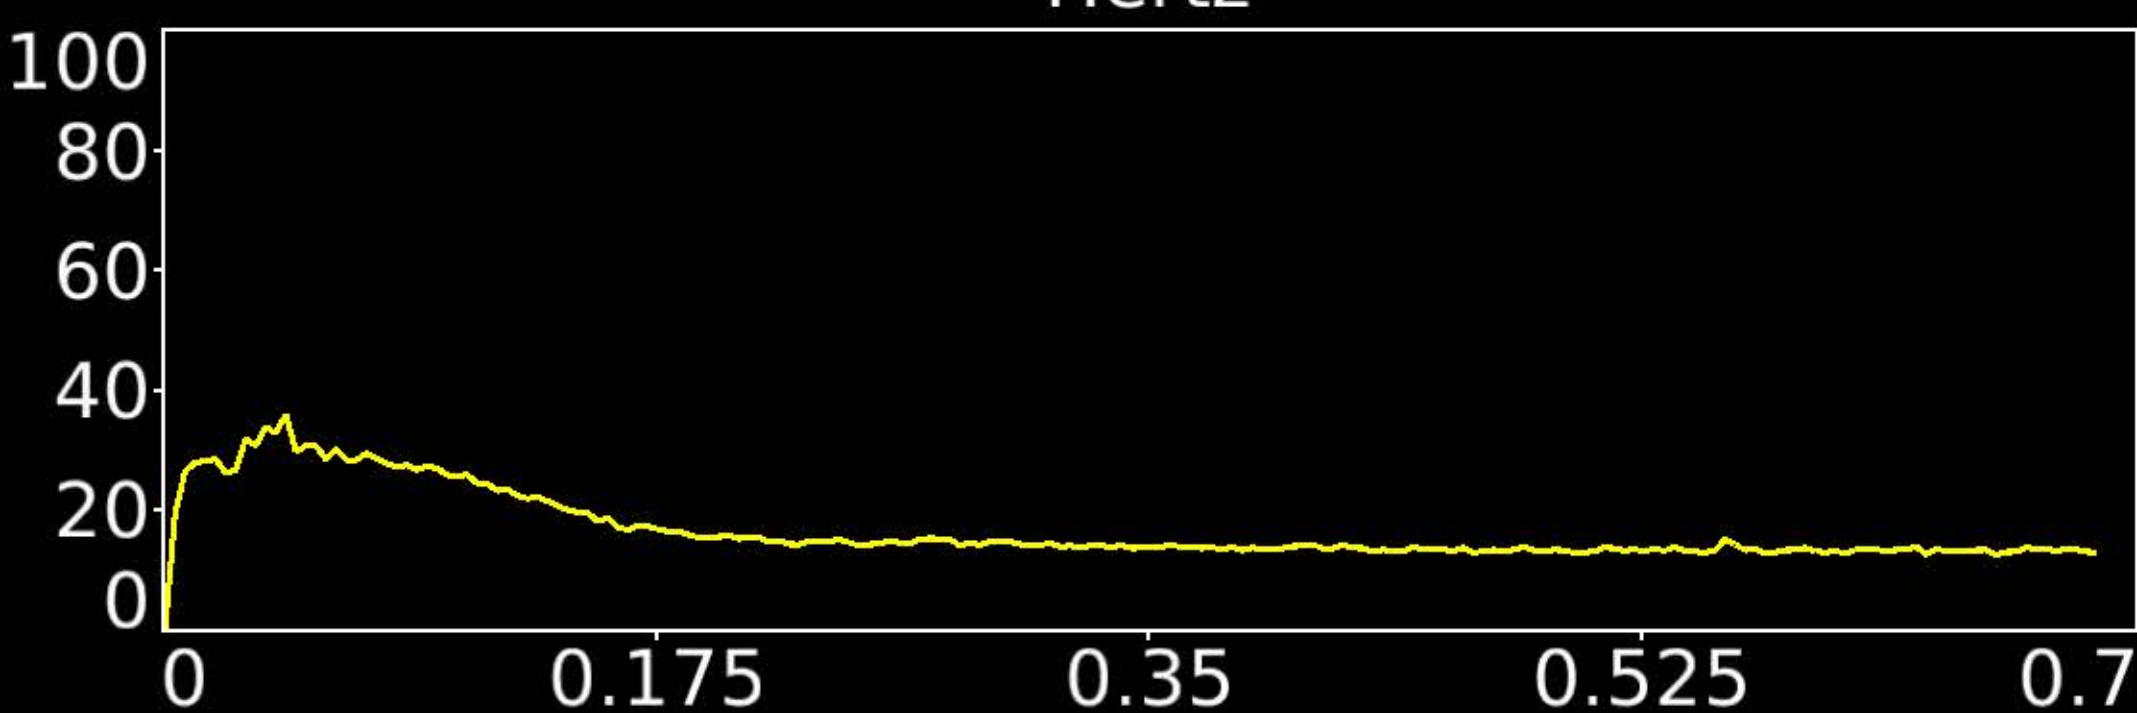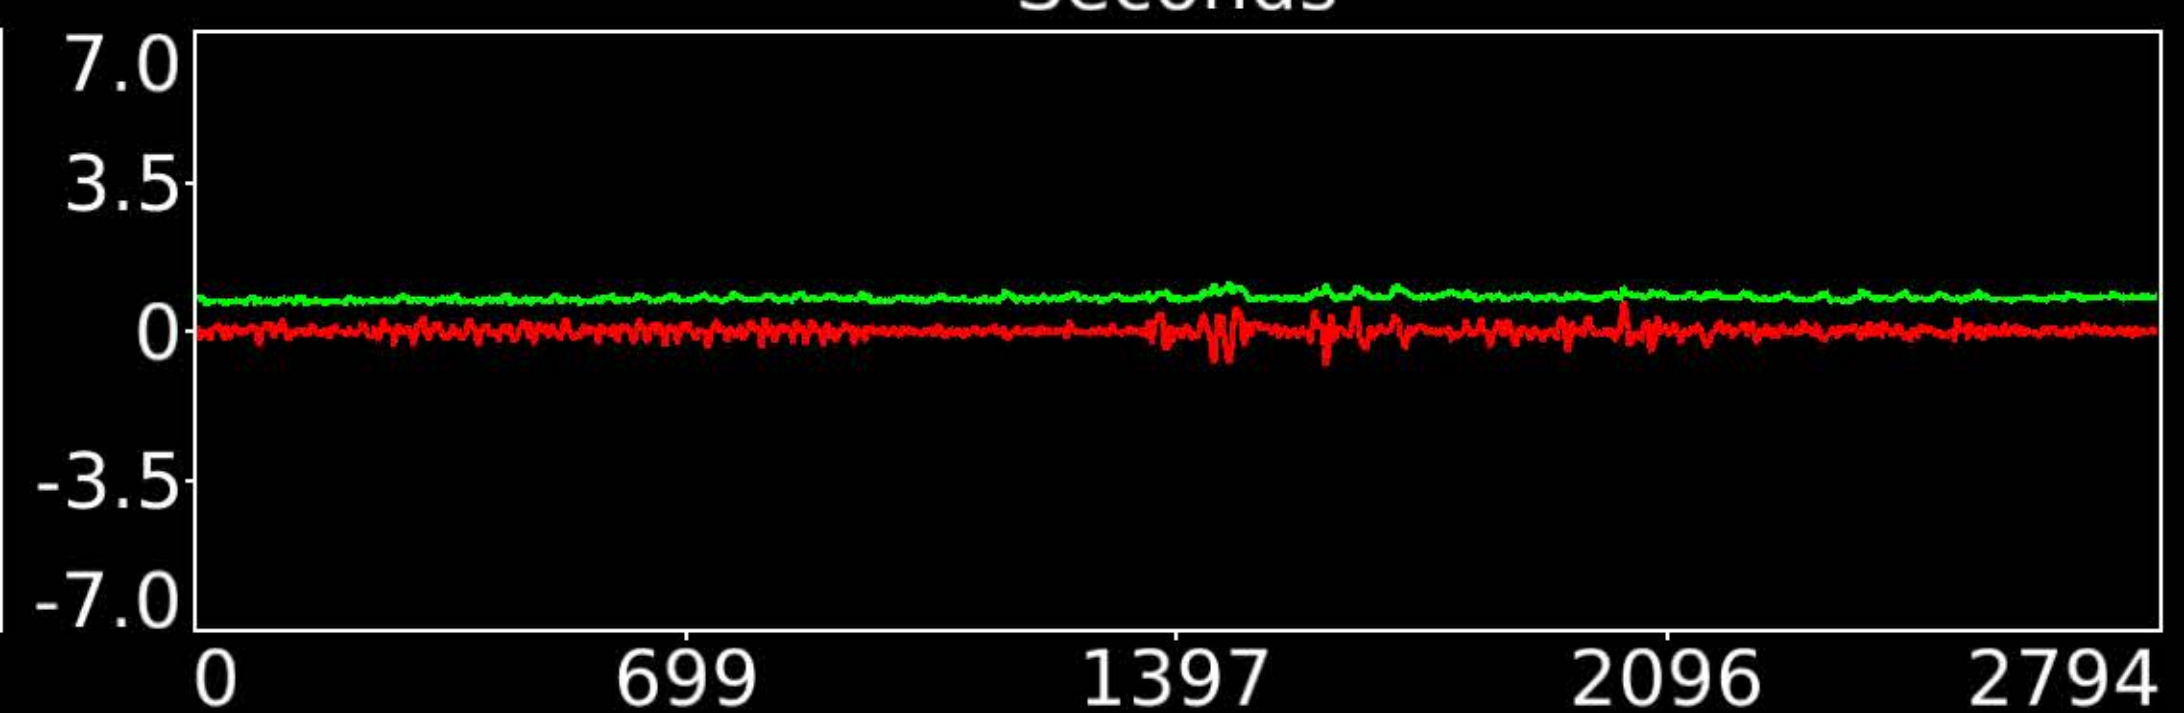

|                           |                            |                            |  |
|---------------------------|----------------------------|----------------------------|--|
| Number & Class: 32 Signal |                            | Name: Cerebellar Unknown   |  |
| RVT Correlated: No        | DVARS Dip Associated: No   | Cross-Subject Variable: No |  |
| Single Subject: No        | % Variance Explained: 1.16 | Globality Index: 0.28      |  |
| Task Component: -36       | Rest Component: 20         | Task Modulated: No         |  |

Rationale: Spatial map includes positive and negative patches that respect known RSN boundaries in the cerebellum



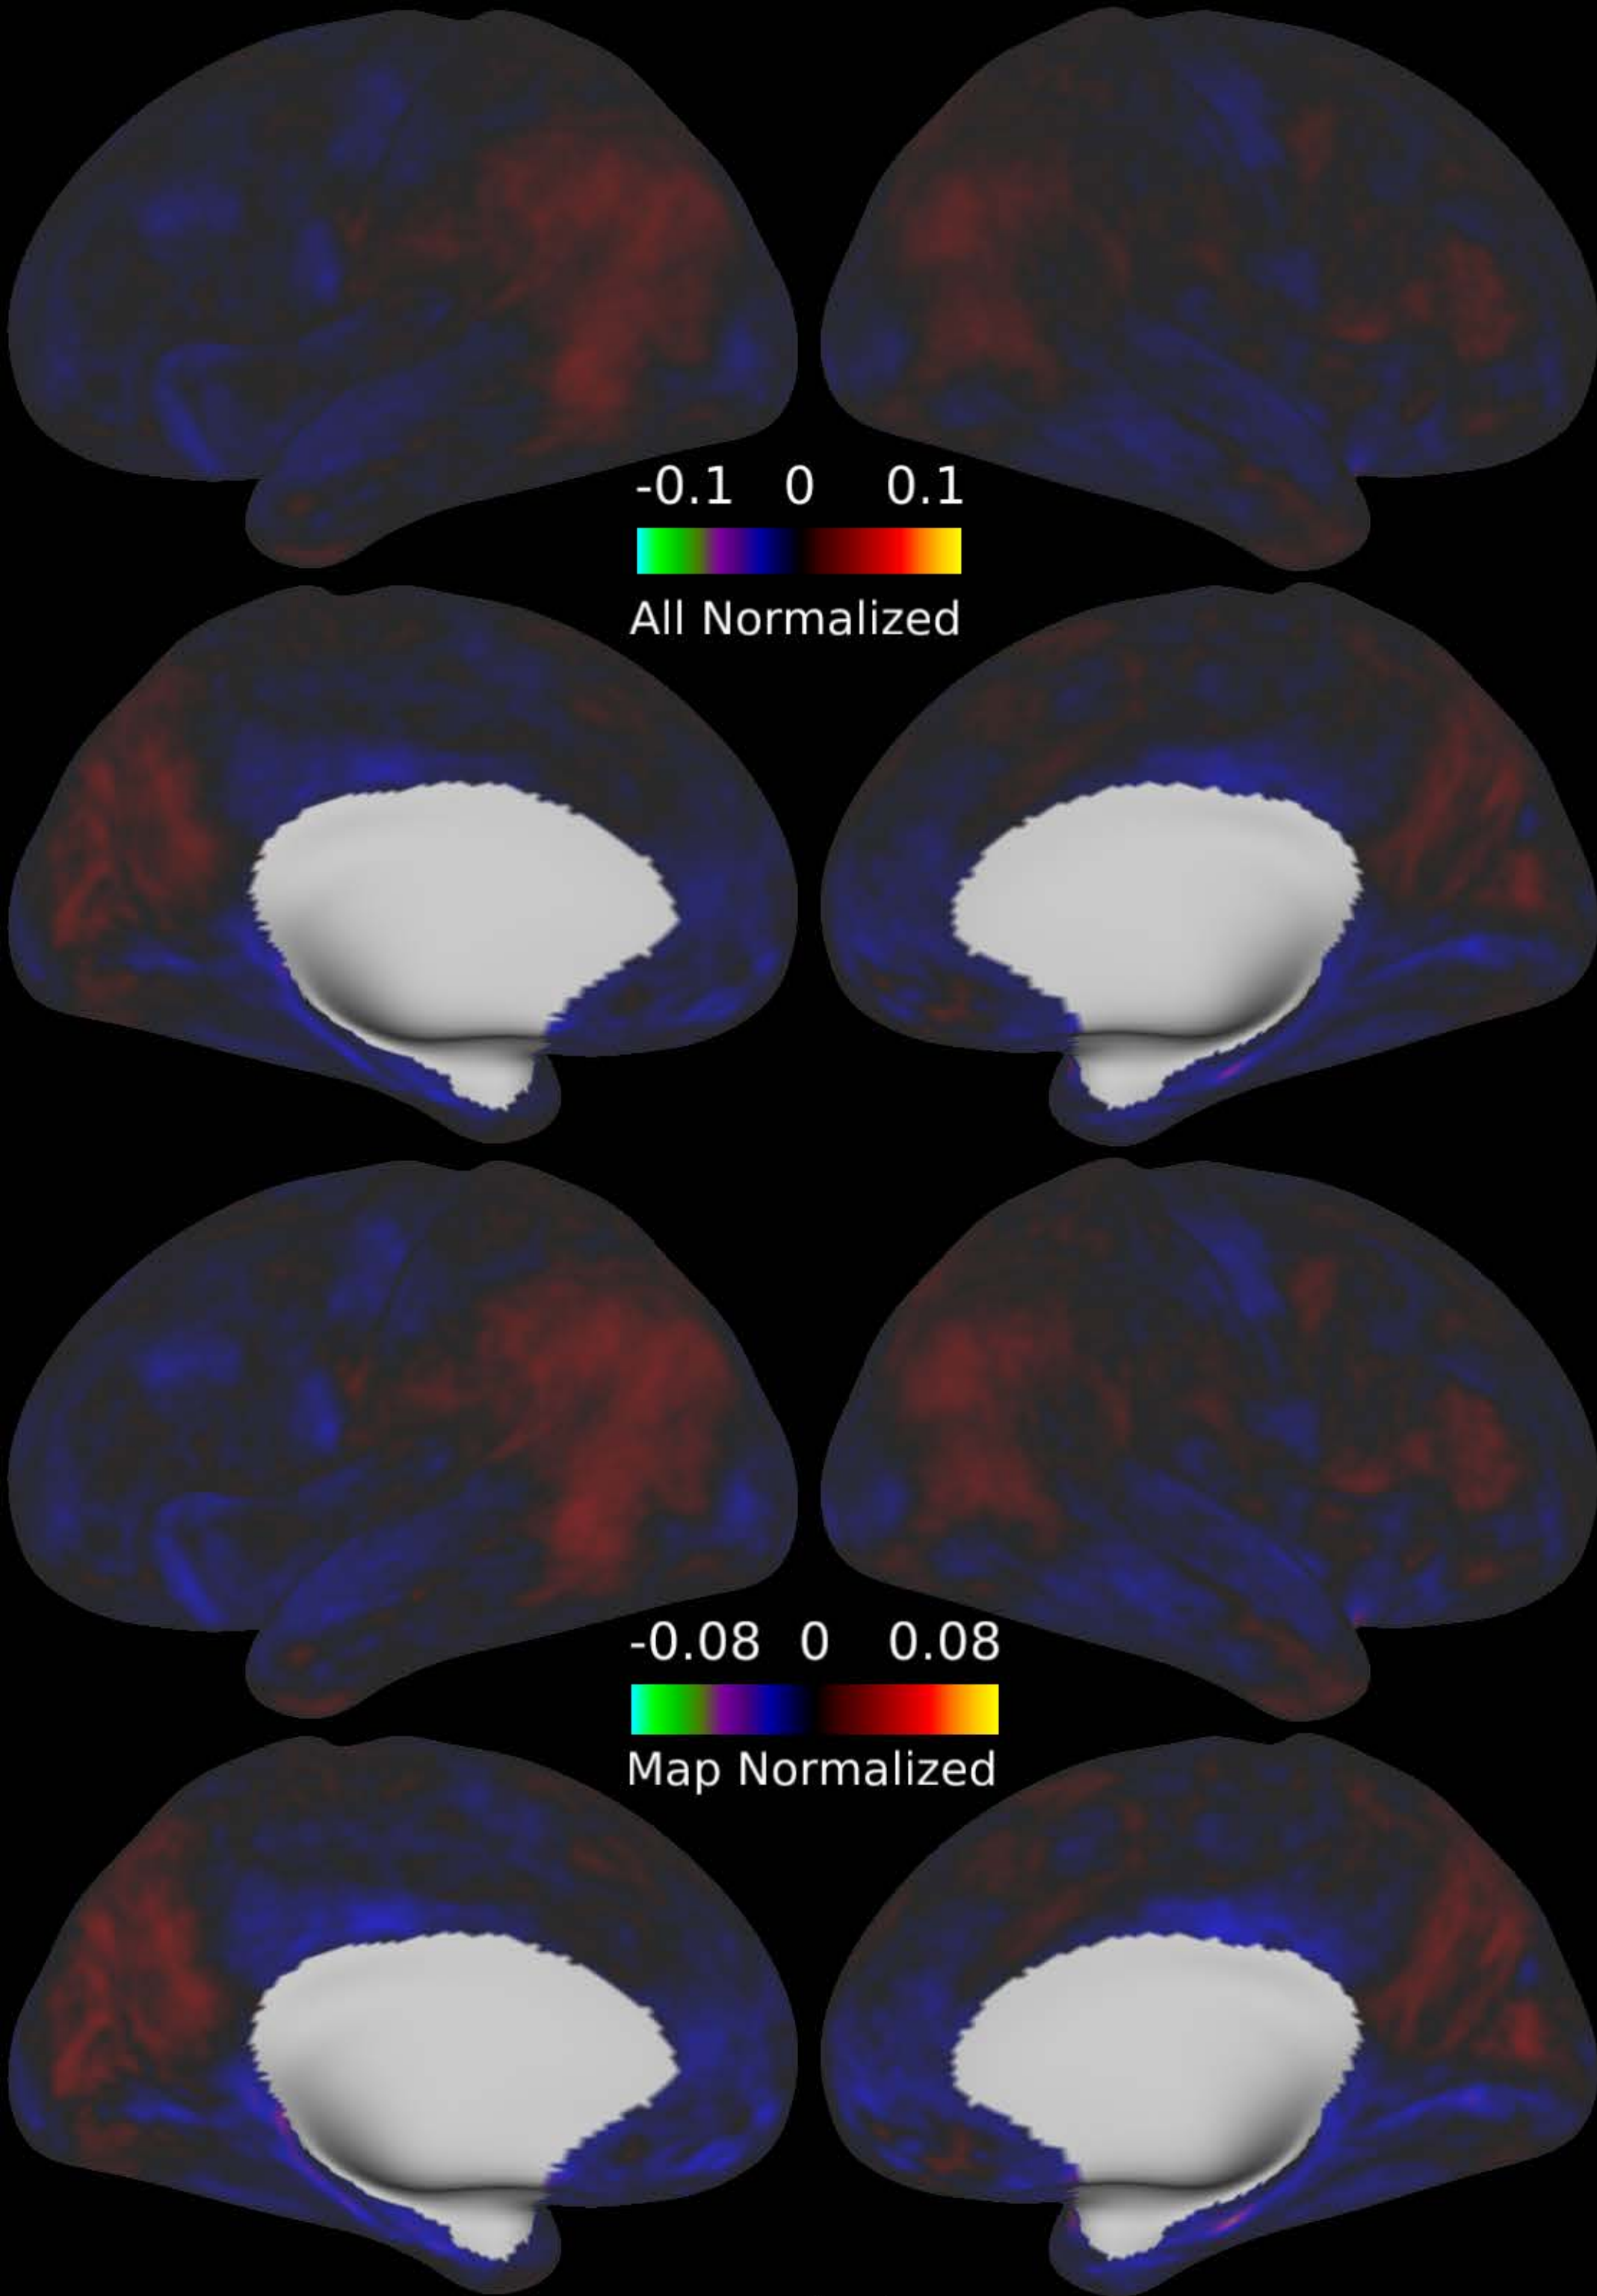

Hertz

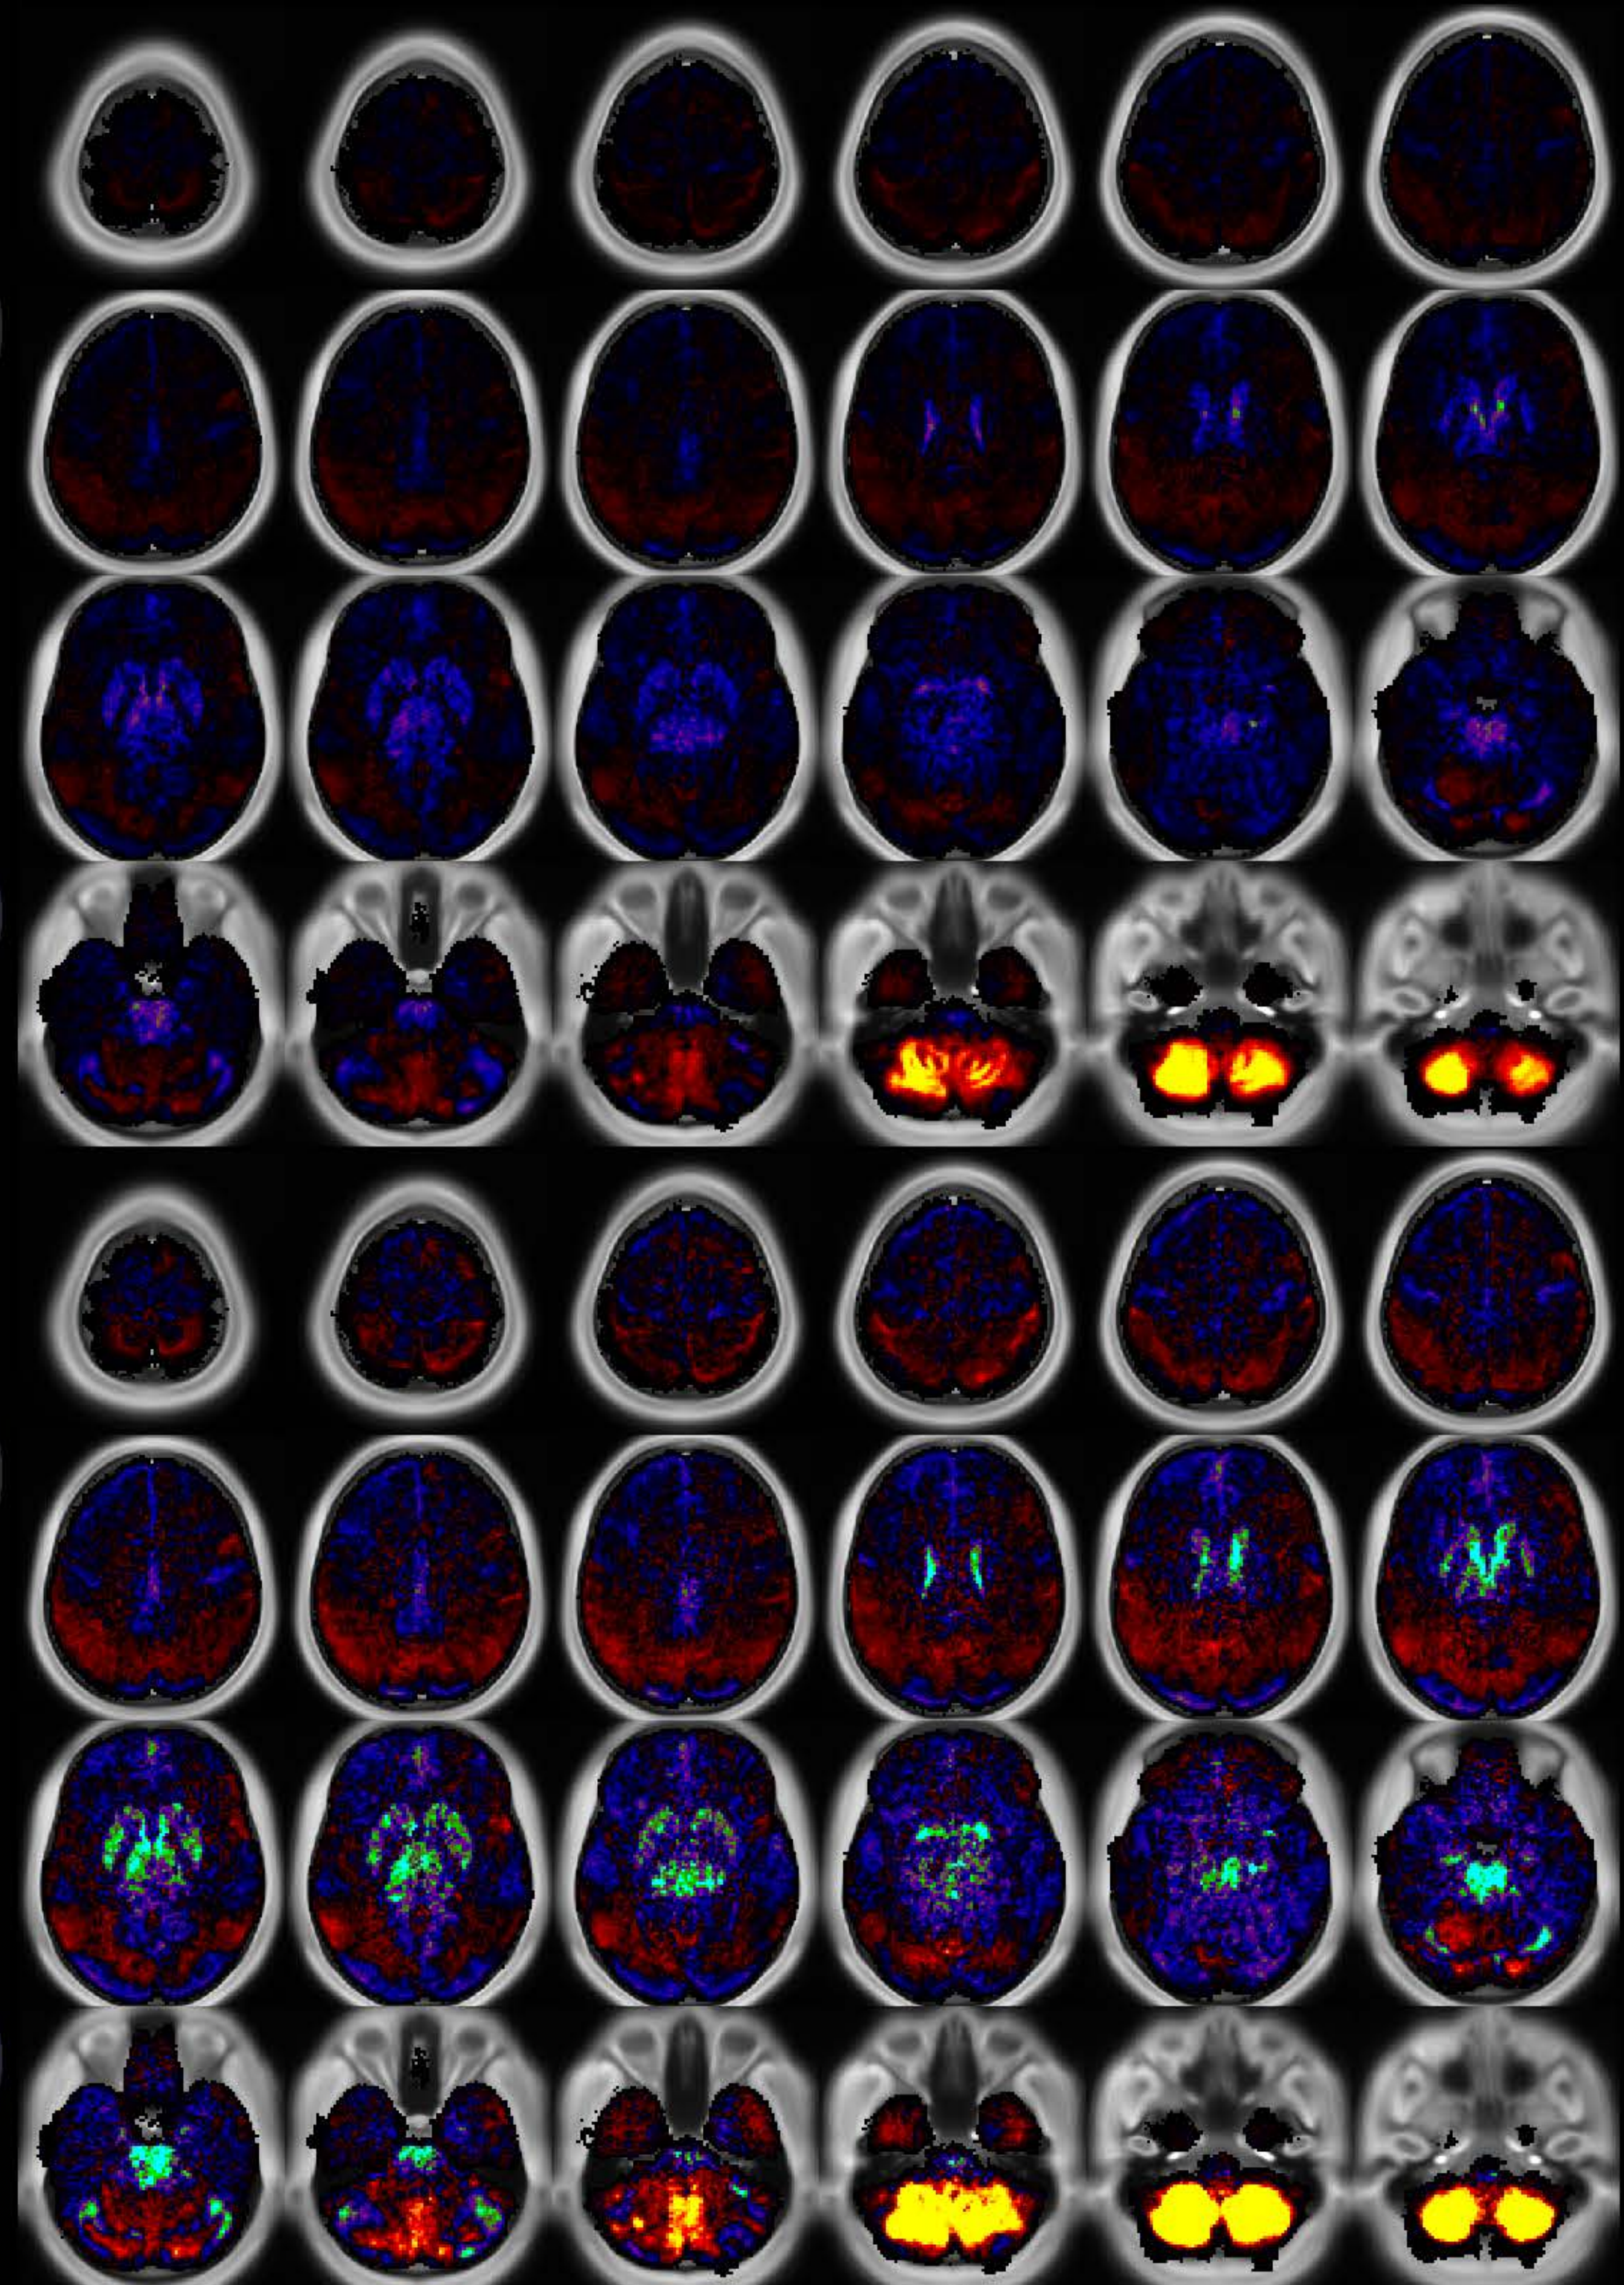

Seconds

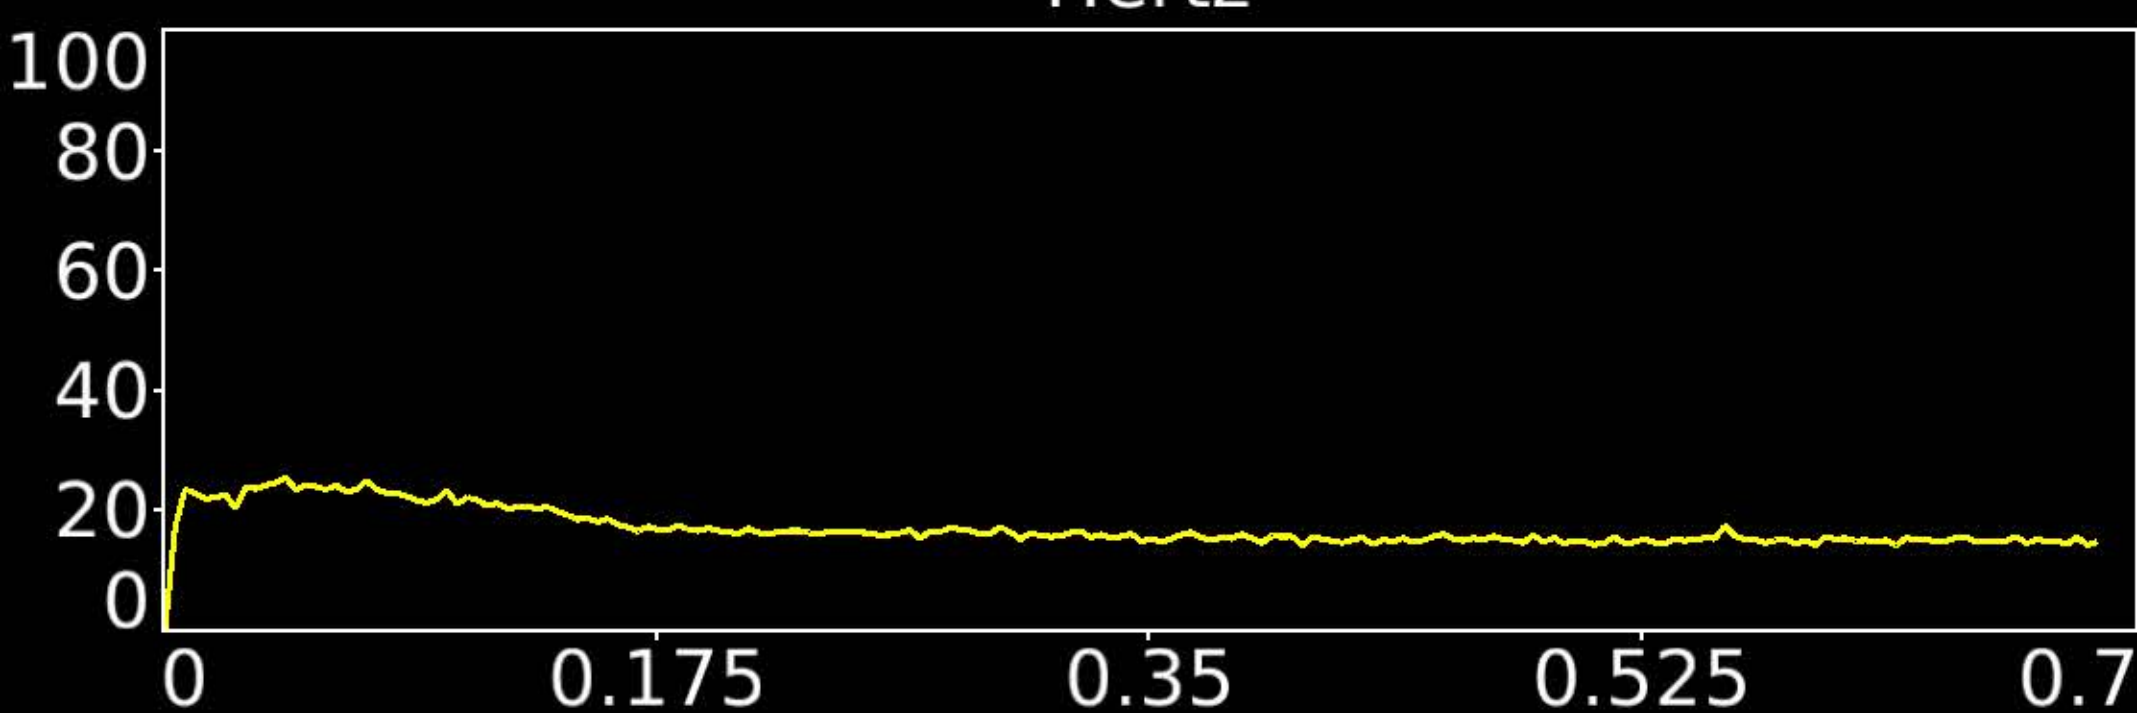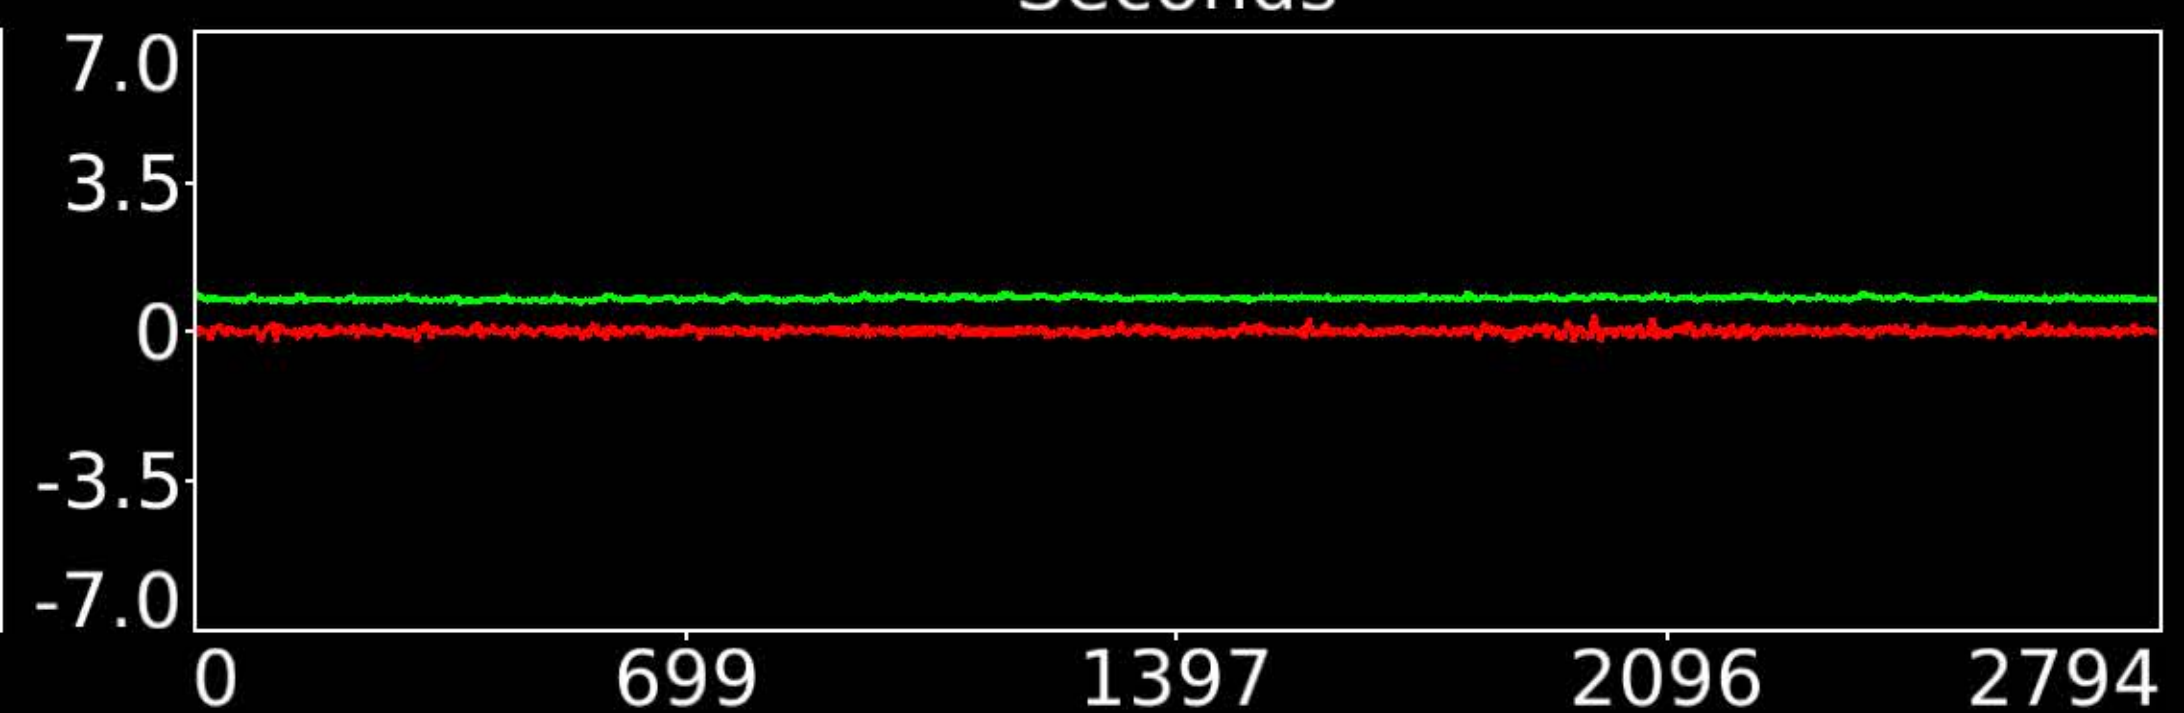

|                                                                                                                                    |                            |                                     |  |
|------------------------------------------------------------------------------------------------------------------------------------|----------------------------|-------------------------------------|--|
| Number & Class: 33 Noise                                                                                                           |                            | Name: Bilateral Inferior Cerebellum |  |
| RVT Correlated: No                                                                                                                 | DVARS Dip Associated: Yes  | Cross-Subject Variable: Yes         |  |
| Single Subject: Yes                                                                                                                | % Variance Explained: 1.11 | Globality Index: 0.61               |  |
| Task Component: 41                                                                                                                 | Rest Component: No         | Task Modulated: No                  |  |
| Rationale: Component is DVARS Dips associated and single subject; perhaps related to motion; reconstruction; or unstructured noise |                            |                                     |  |



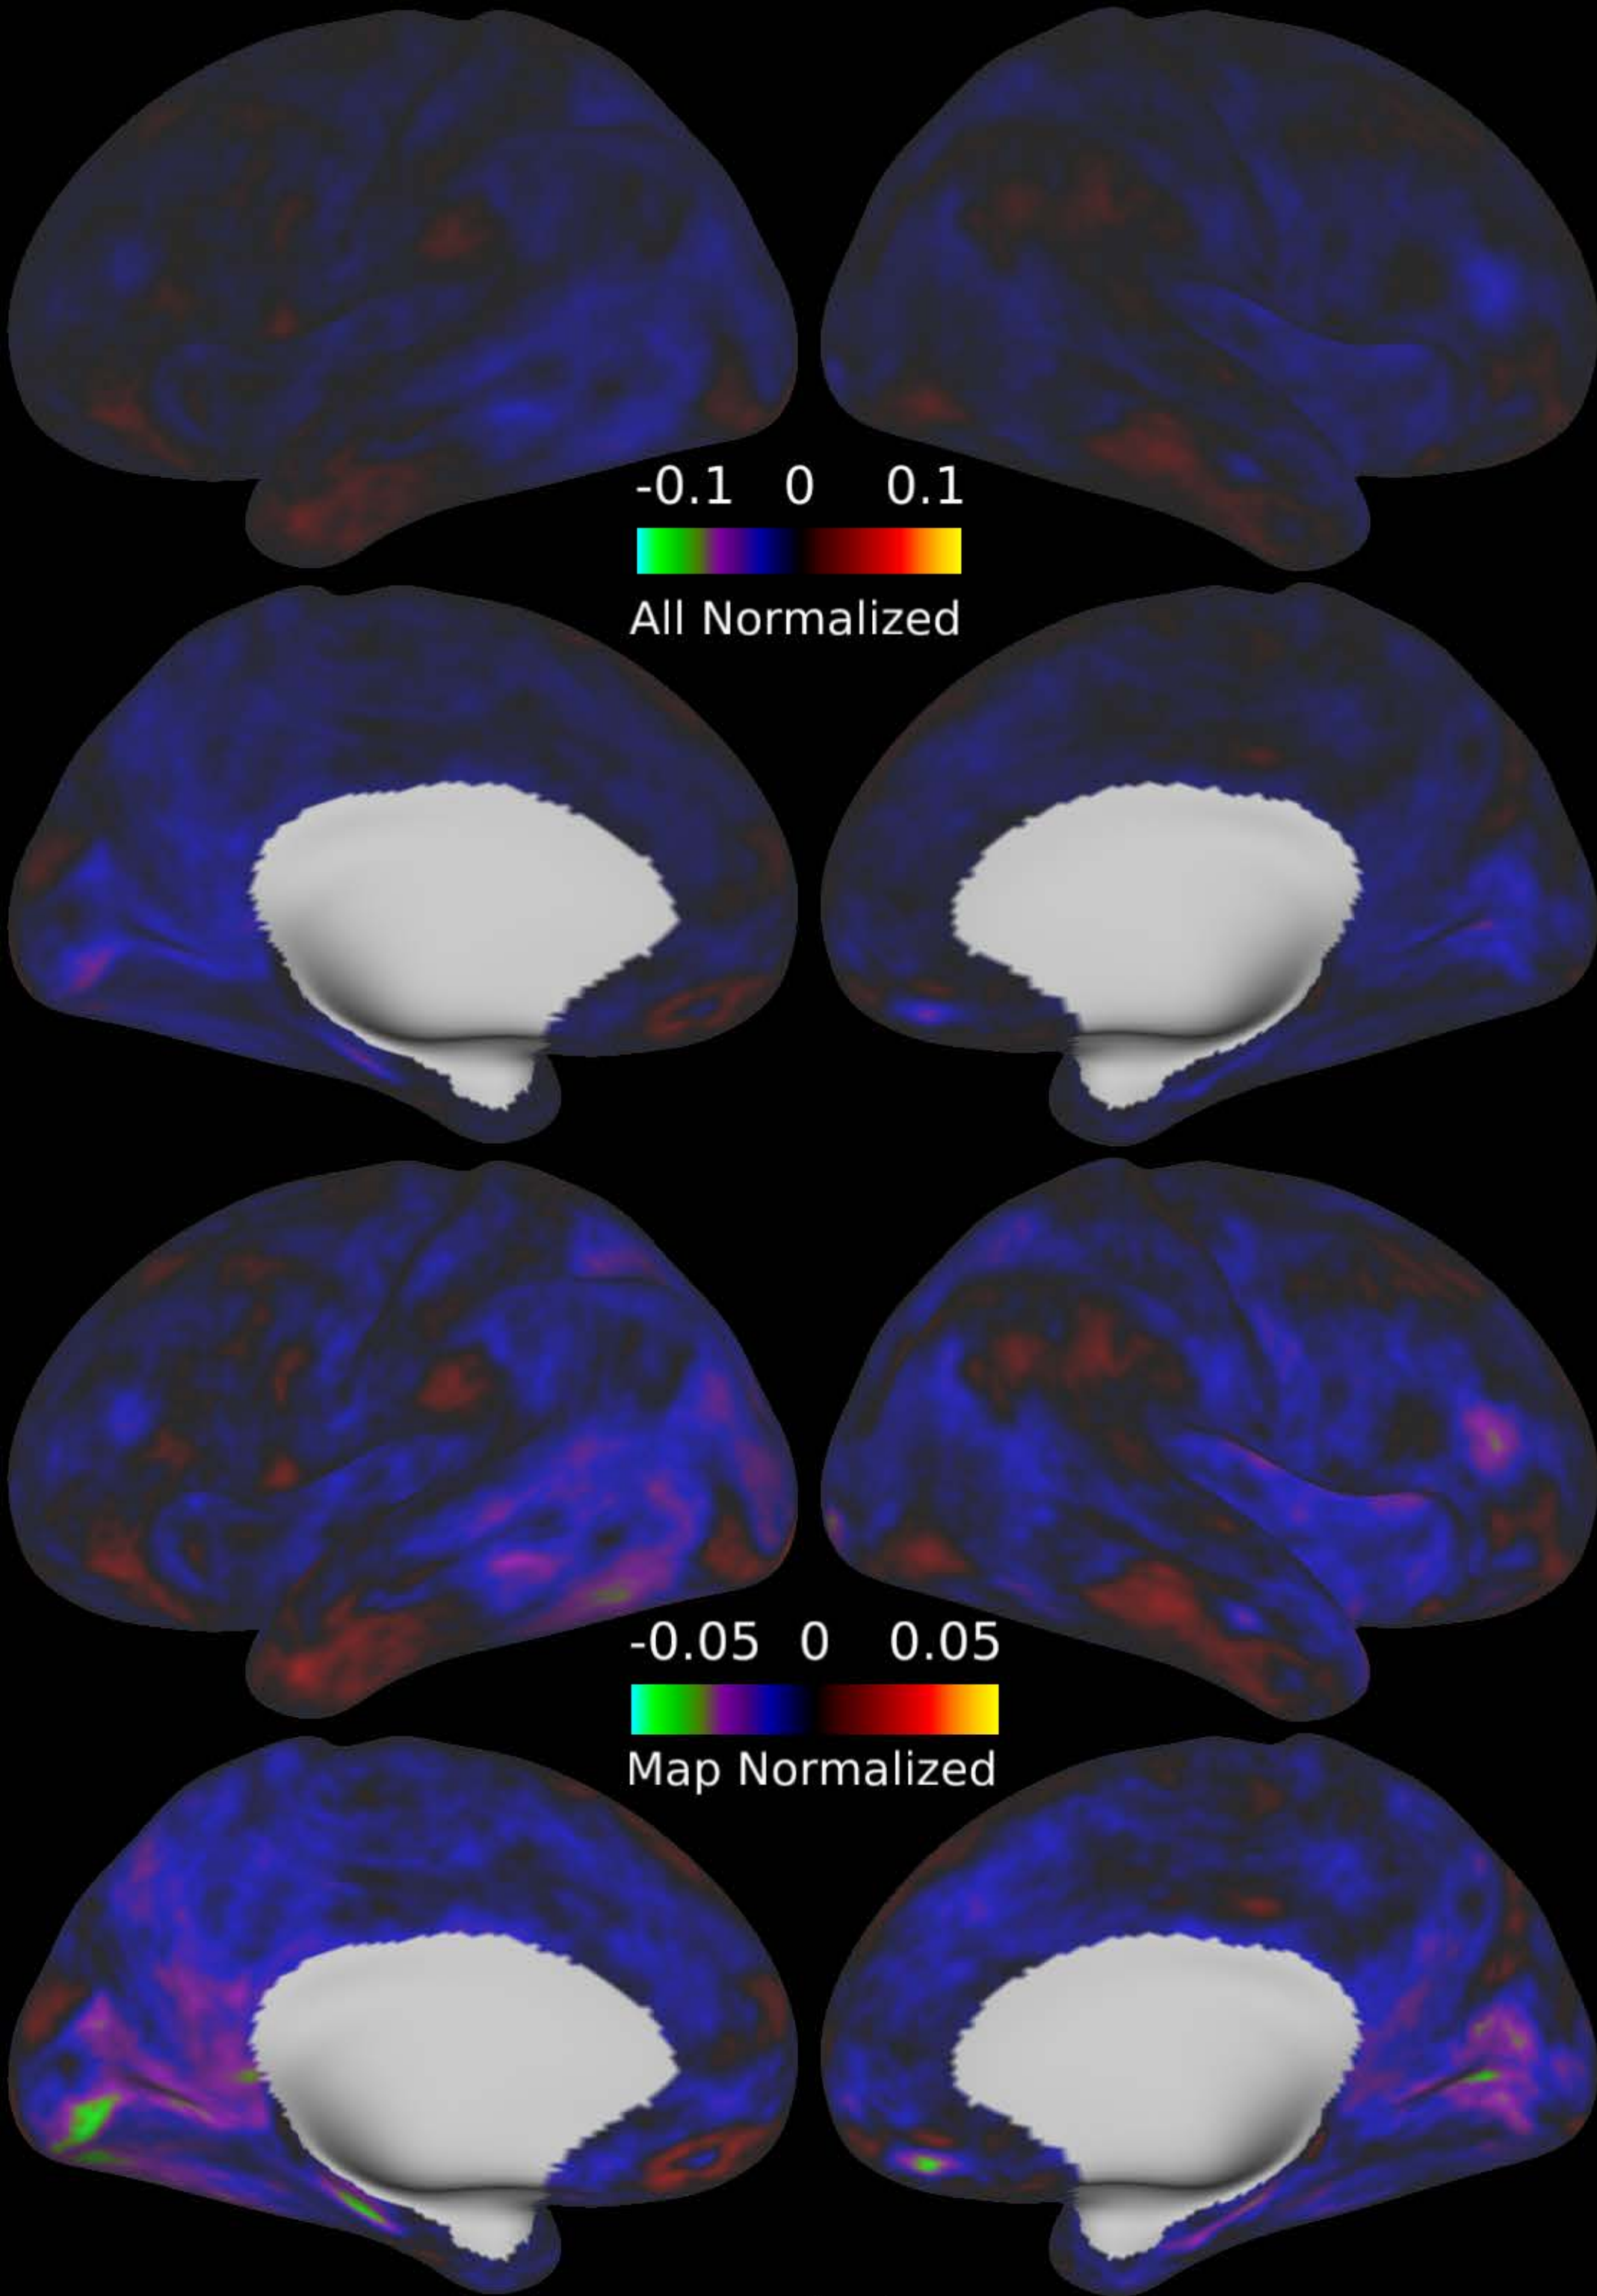

Hertz

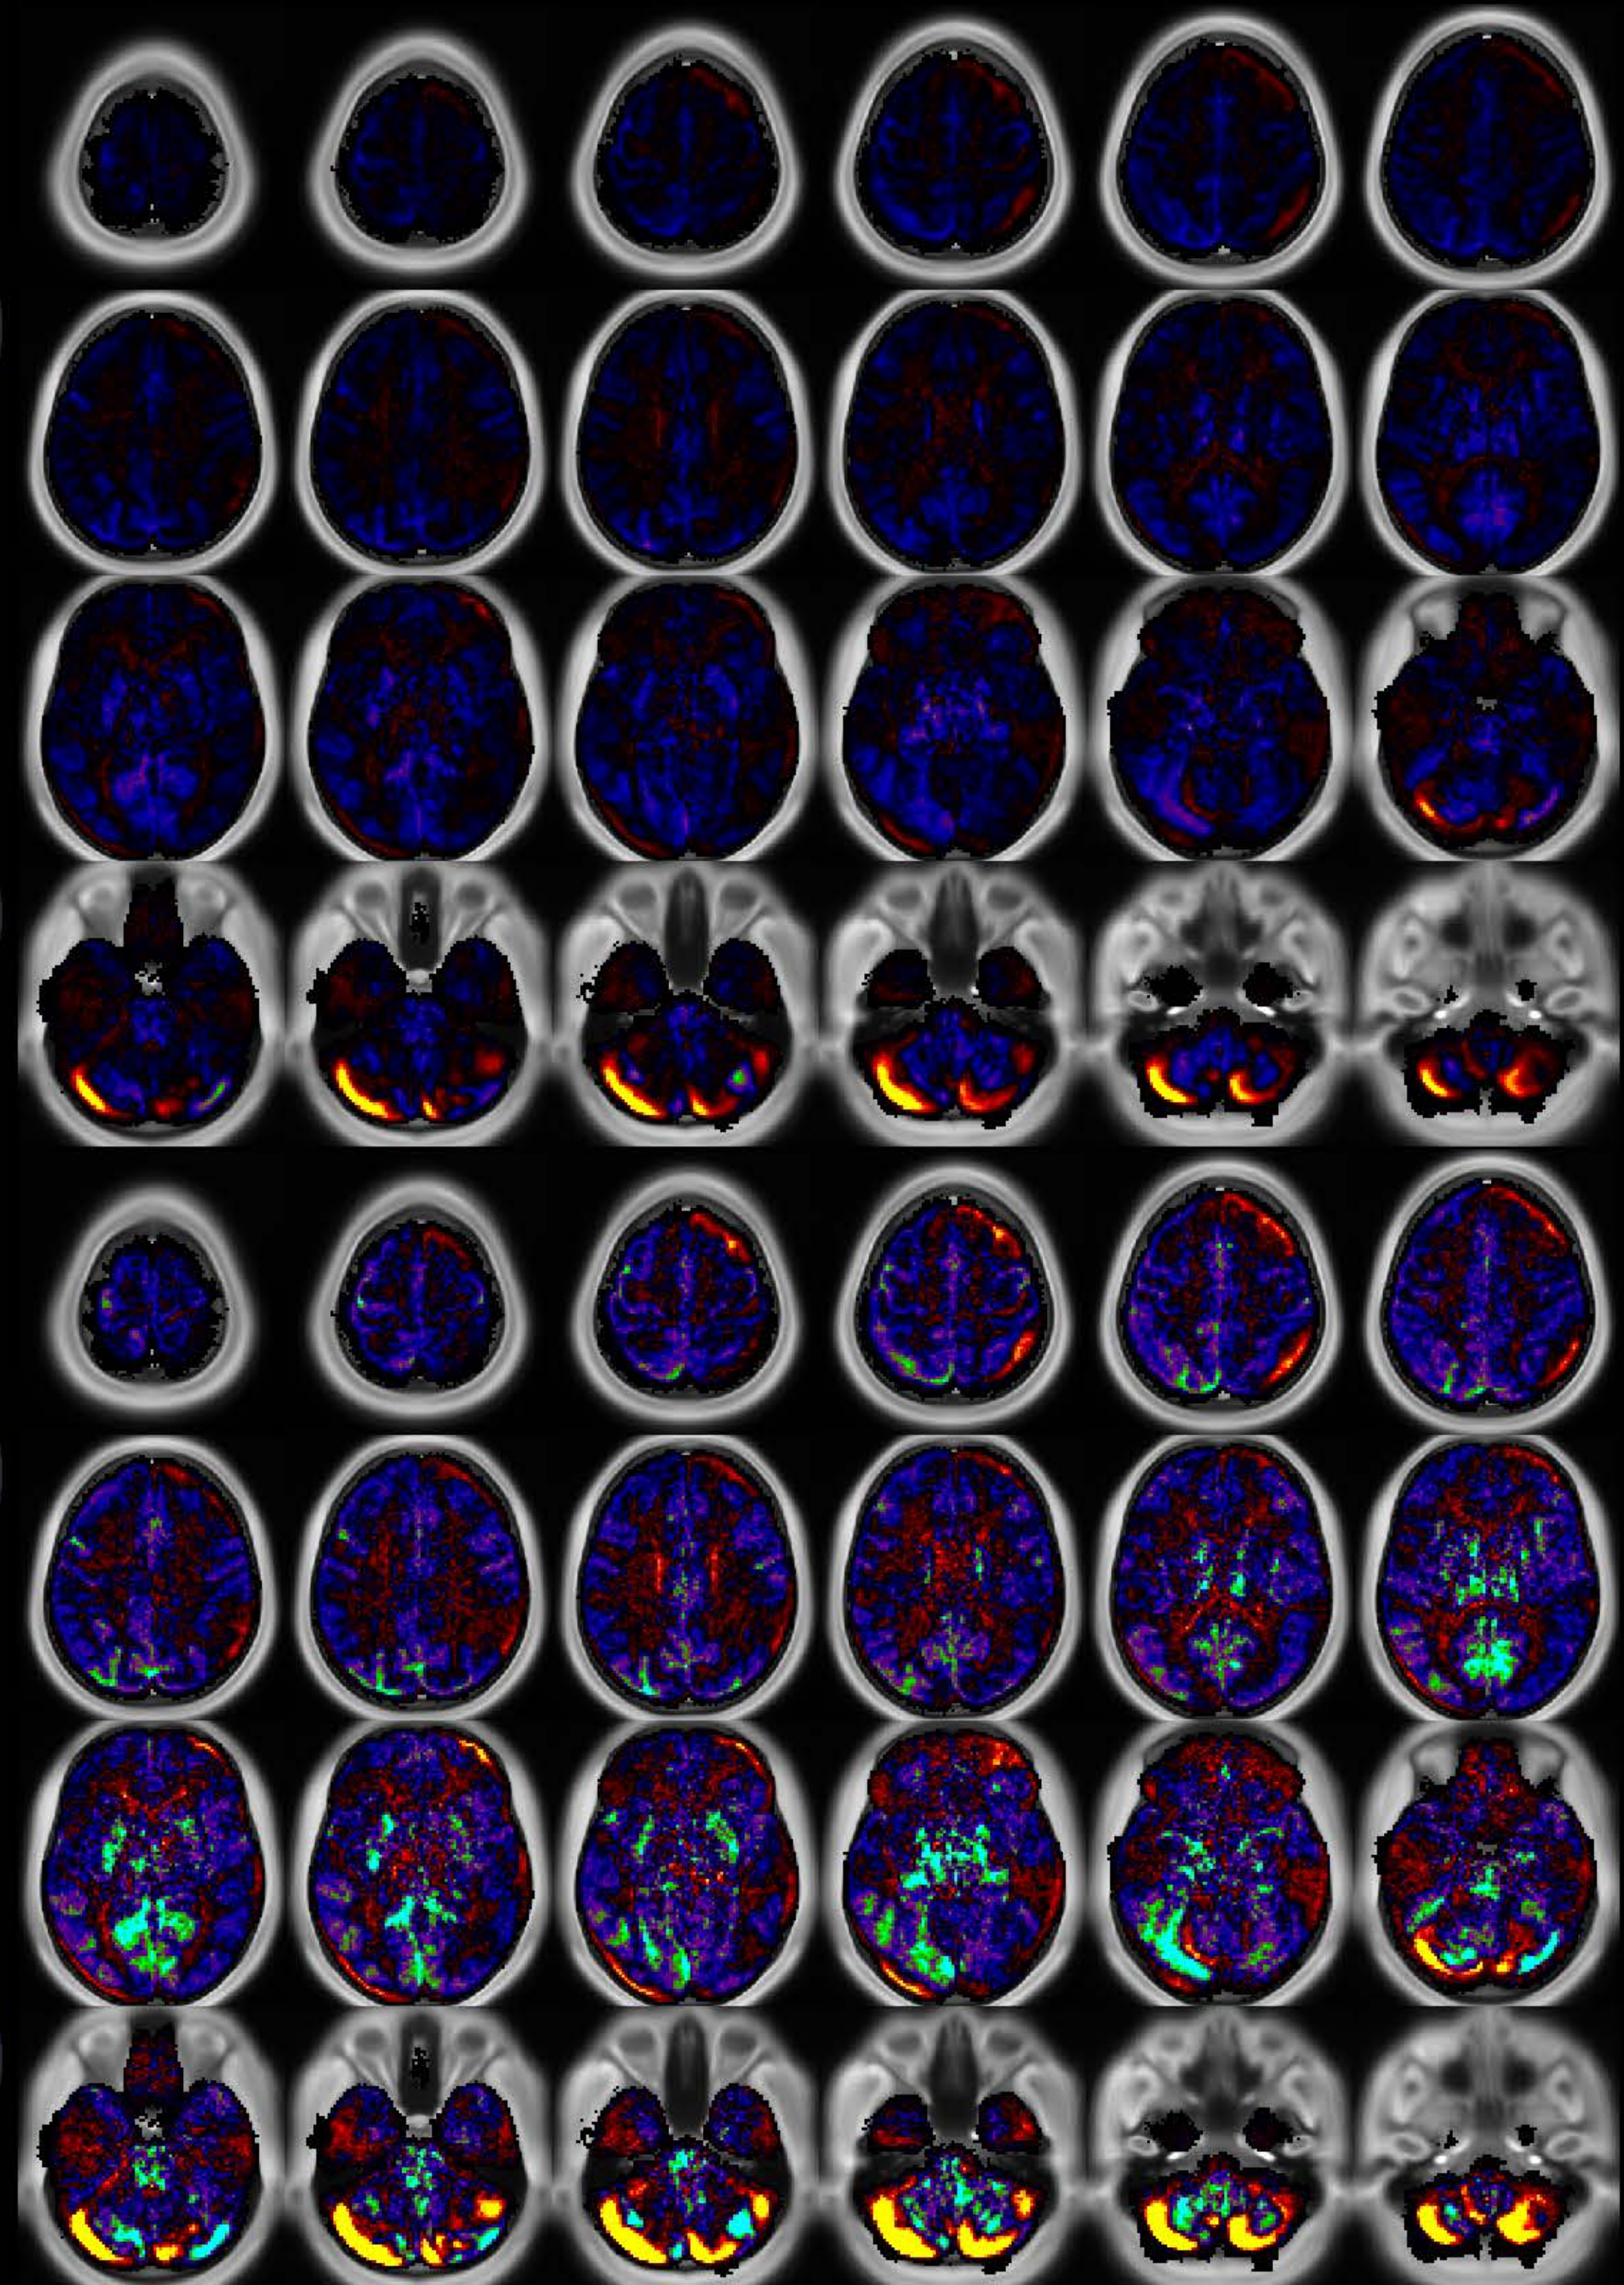

Seconds

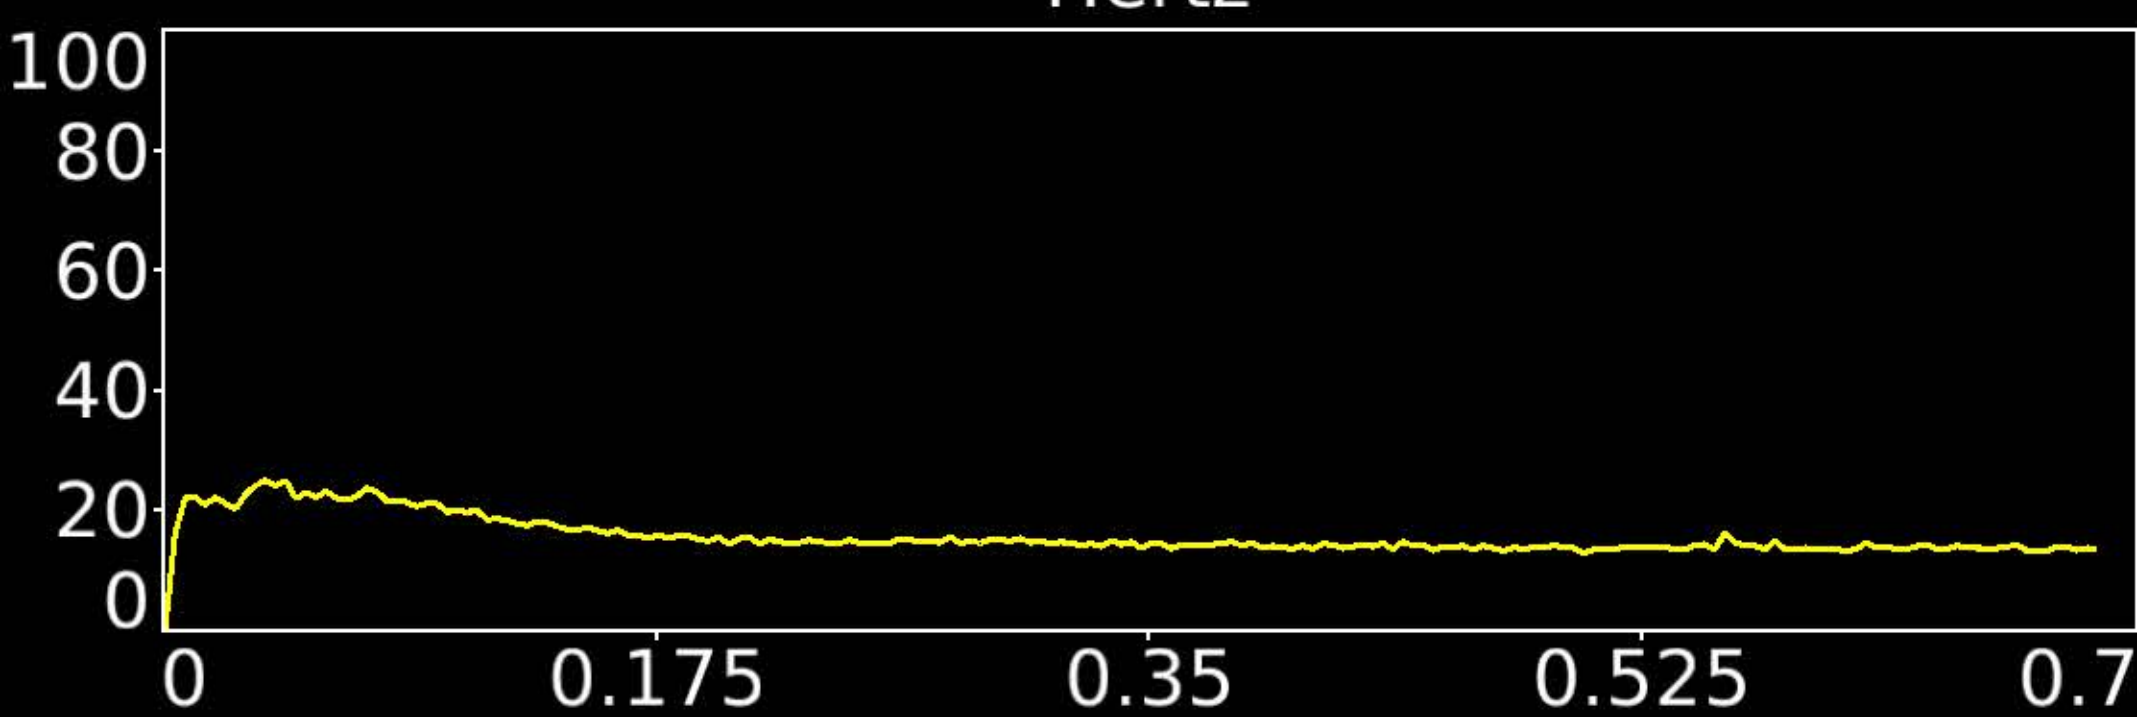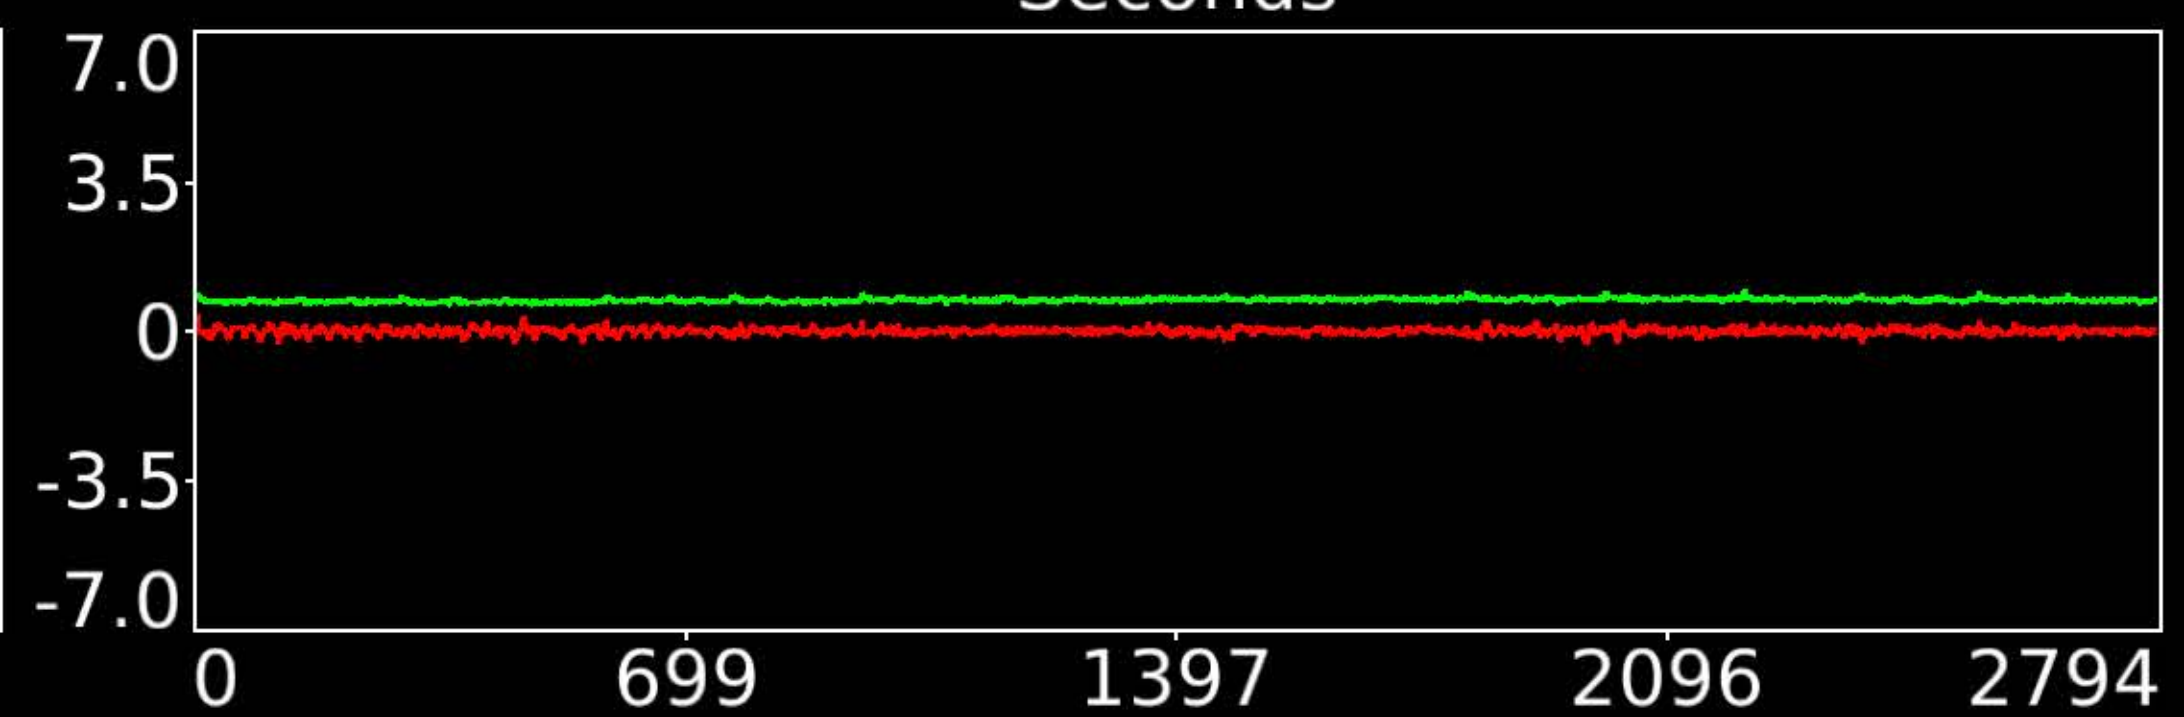

|                          |                            |                                         |  |
|--------------------------|----------------------------|-----------------------------------------|--|
| Number & Class: 34 Noise |                            | Name: Cerebellar Movement Artifact Left |  |
| RVT Correlated: No       | DVARS Dip Associated: Yes  | Cross-Subject Variable: Yes             |  |
| Single Subject: Yes      | % Variance Explained: 1.05 | Globality Index: 1.82                   |  |
| Task Component: 44       | Rest Component: 57         | Task Modulated: No                      |  |

Rationale: Cerebellar edge motion component with high correlation to DVARS dipoles; looks like movement regressor beta map (derivative of X translation)



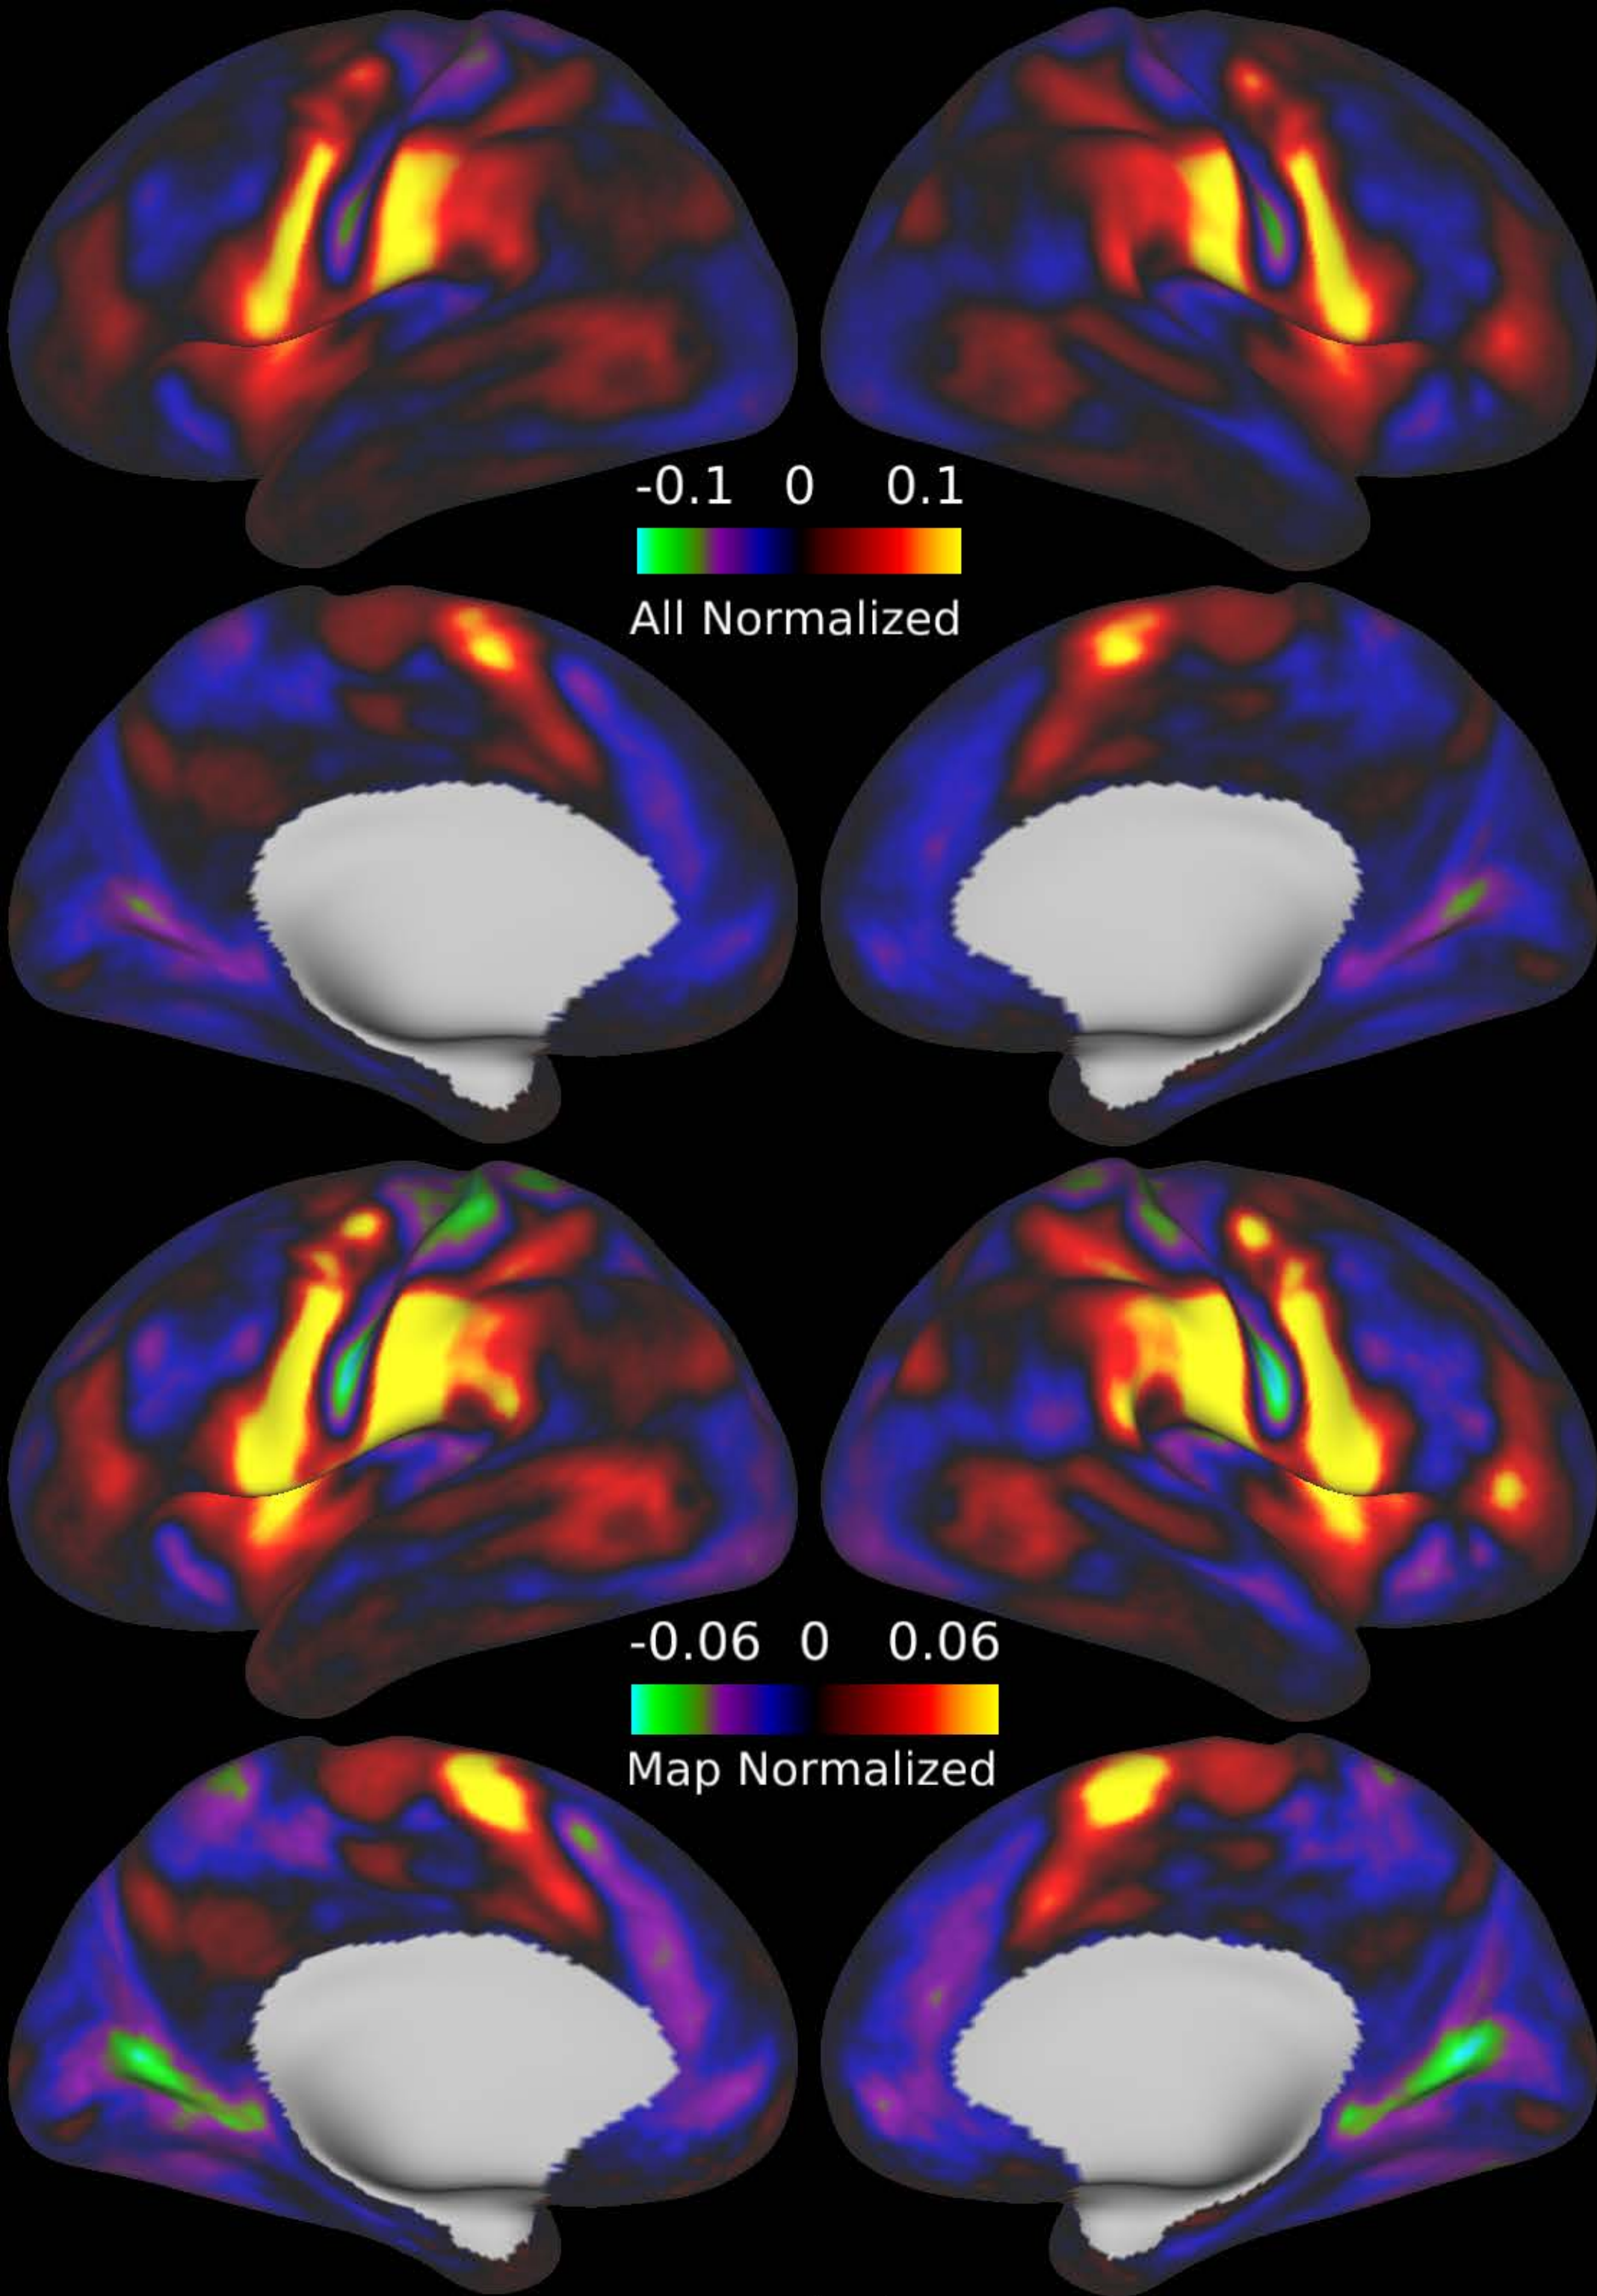

Hertz

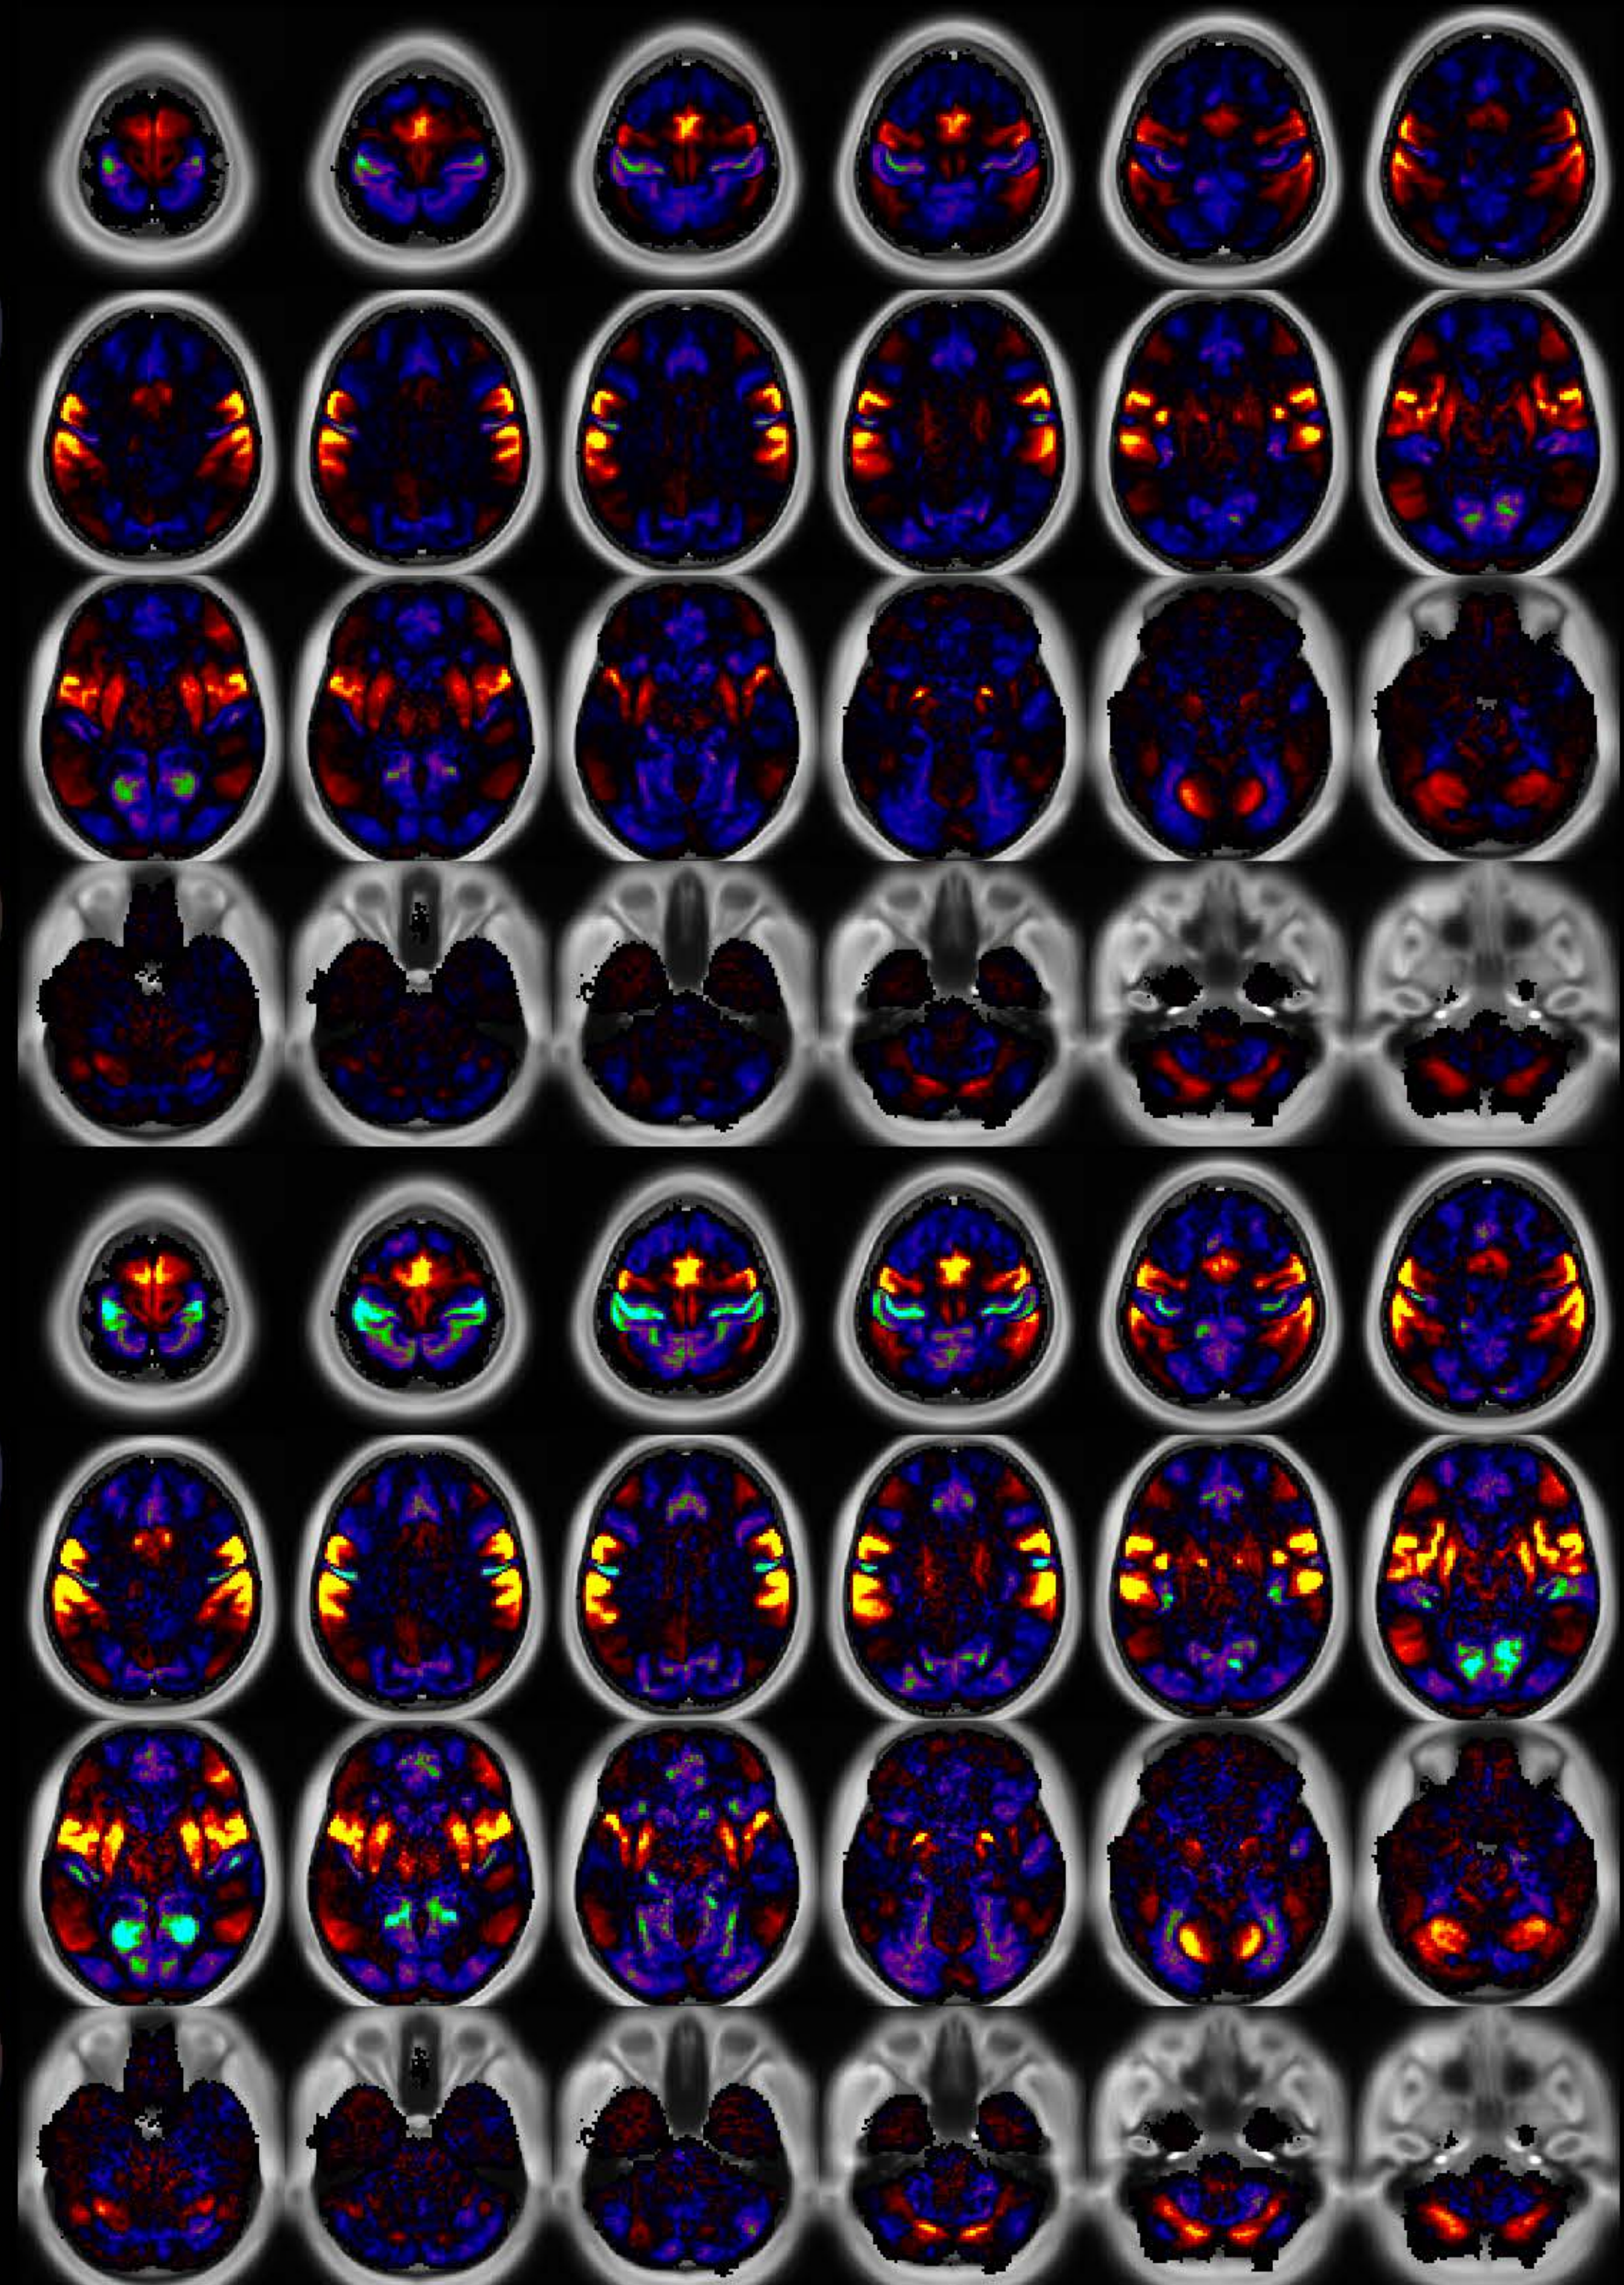

Seconds

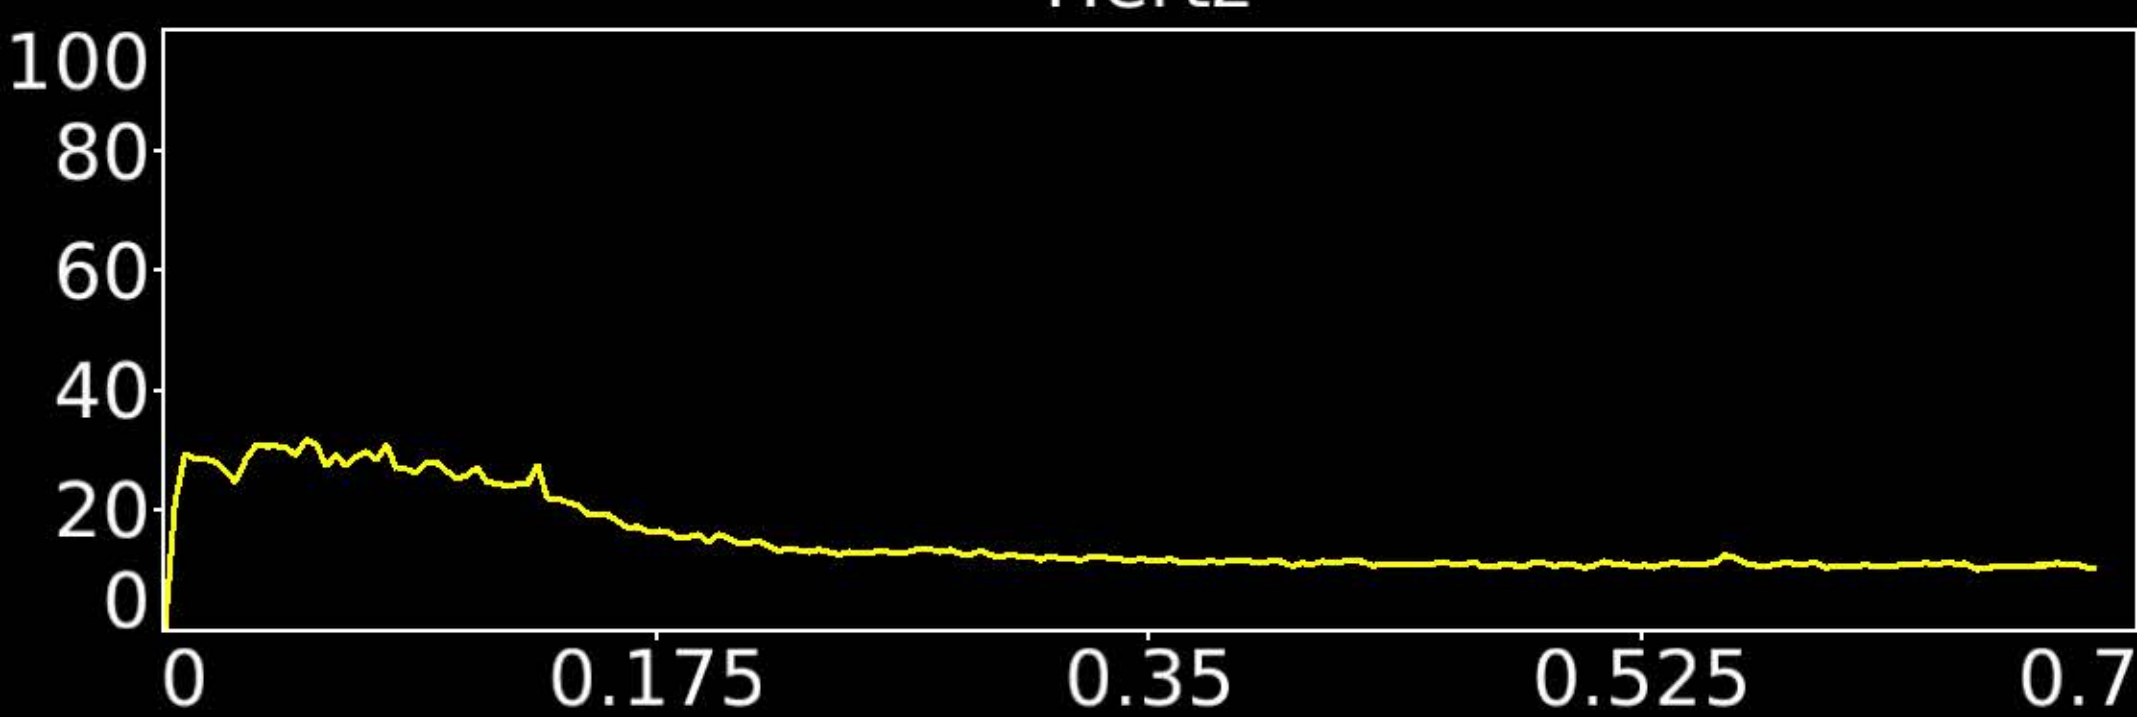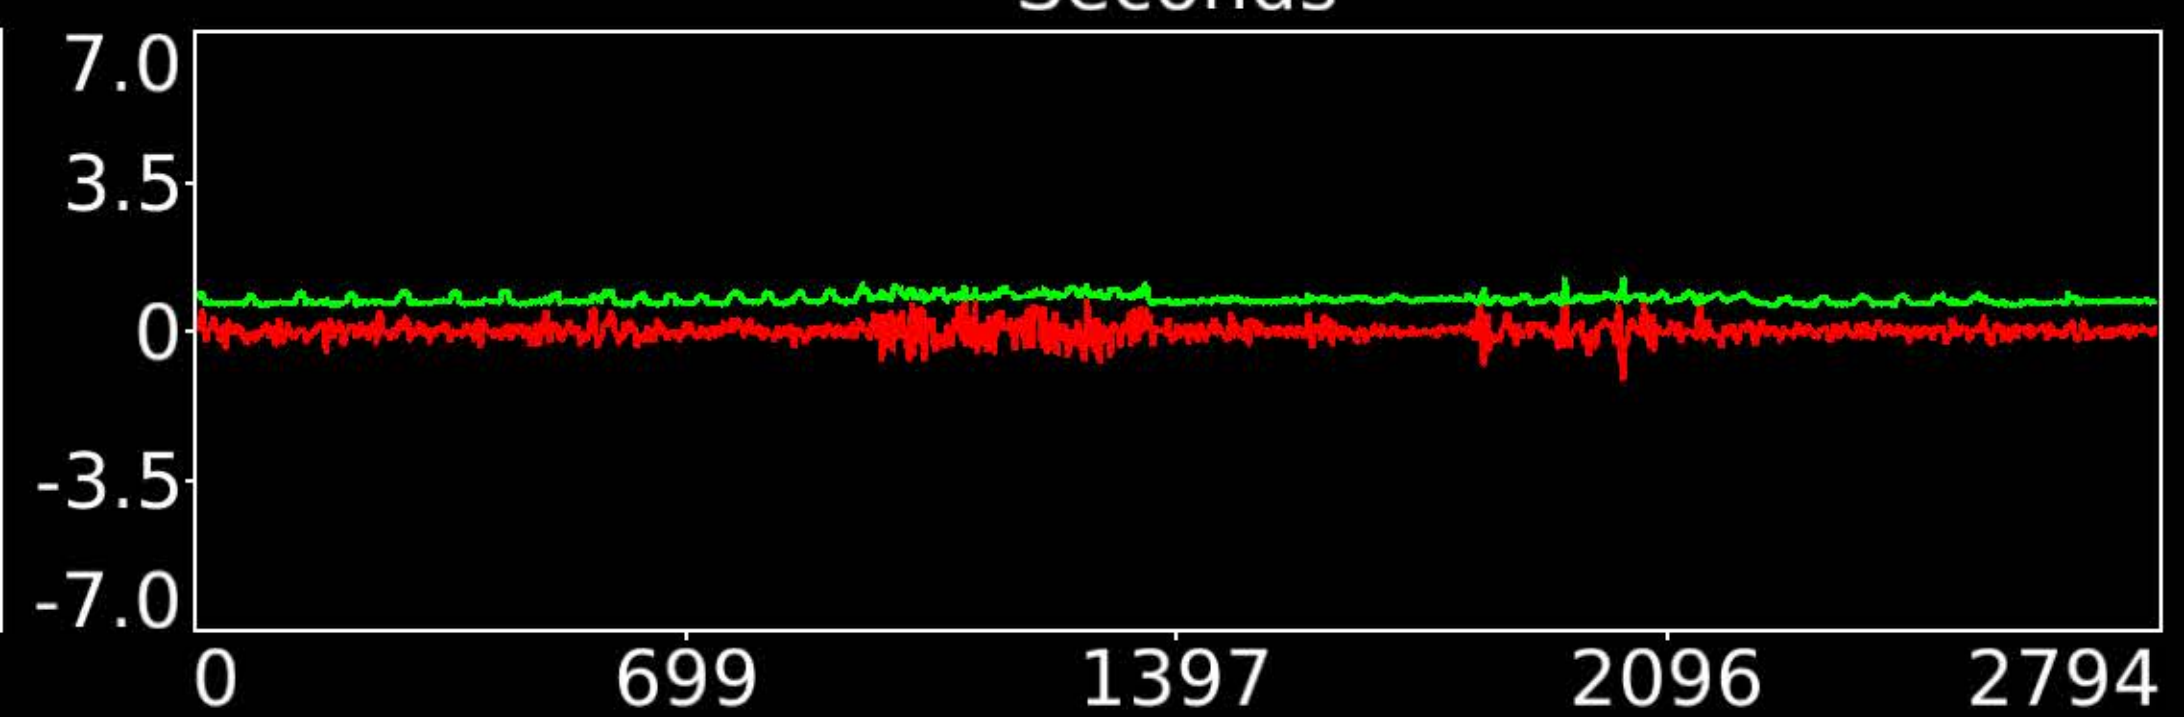

|                           |                            |                                     |  |
|---------------------------|----------------------------|-------------------------------------|--|
| Number & Class: 35 Signal |                            | Name: Motor and Sensory Association |  |
| RVT Correlated: No        | DVARS Dip Associated: No   | Cross-Subject Variable: No          |  |
| Single Subject: No        | % Variance Explained: 1.06 | Globality Index: 0.39               |  |
| Task Component: No        | Rest Component: 54         | Task Modulated: No                  |  |

Rationale: Spatial map includes positive and negative patches that respect known areal boundaries (e.g. 4 and 1)



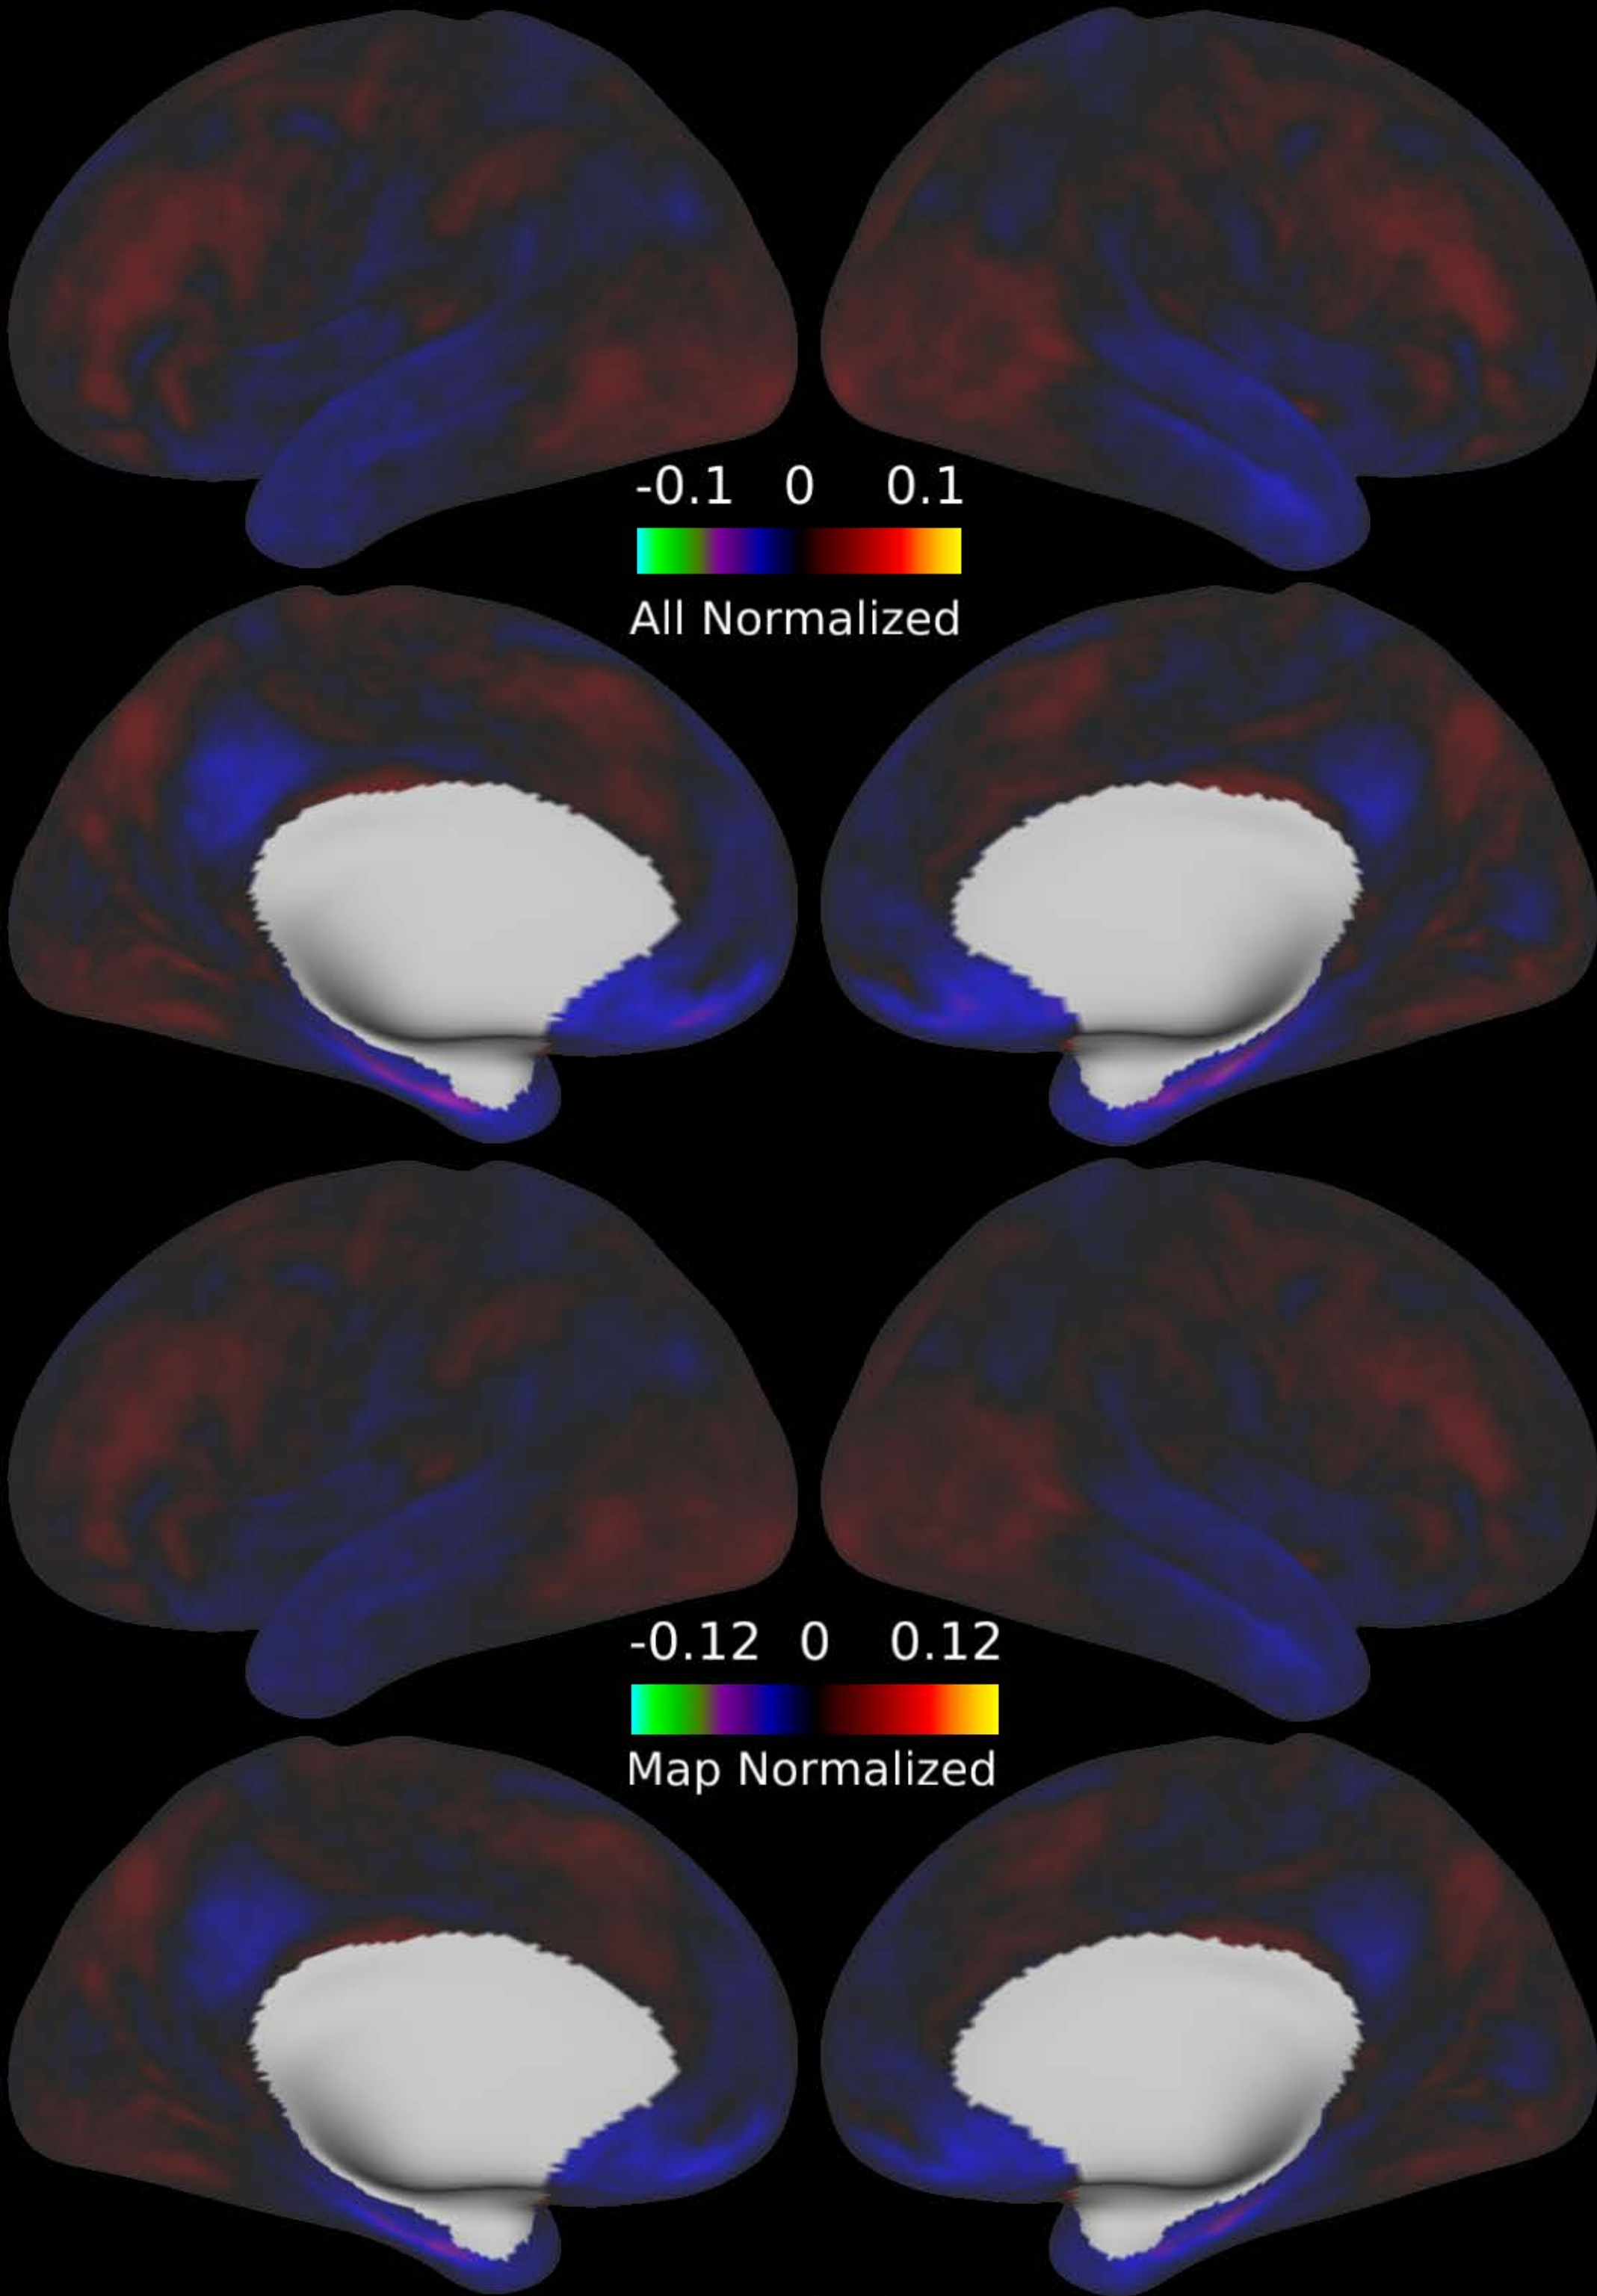

Hertz

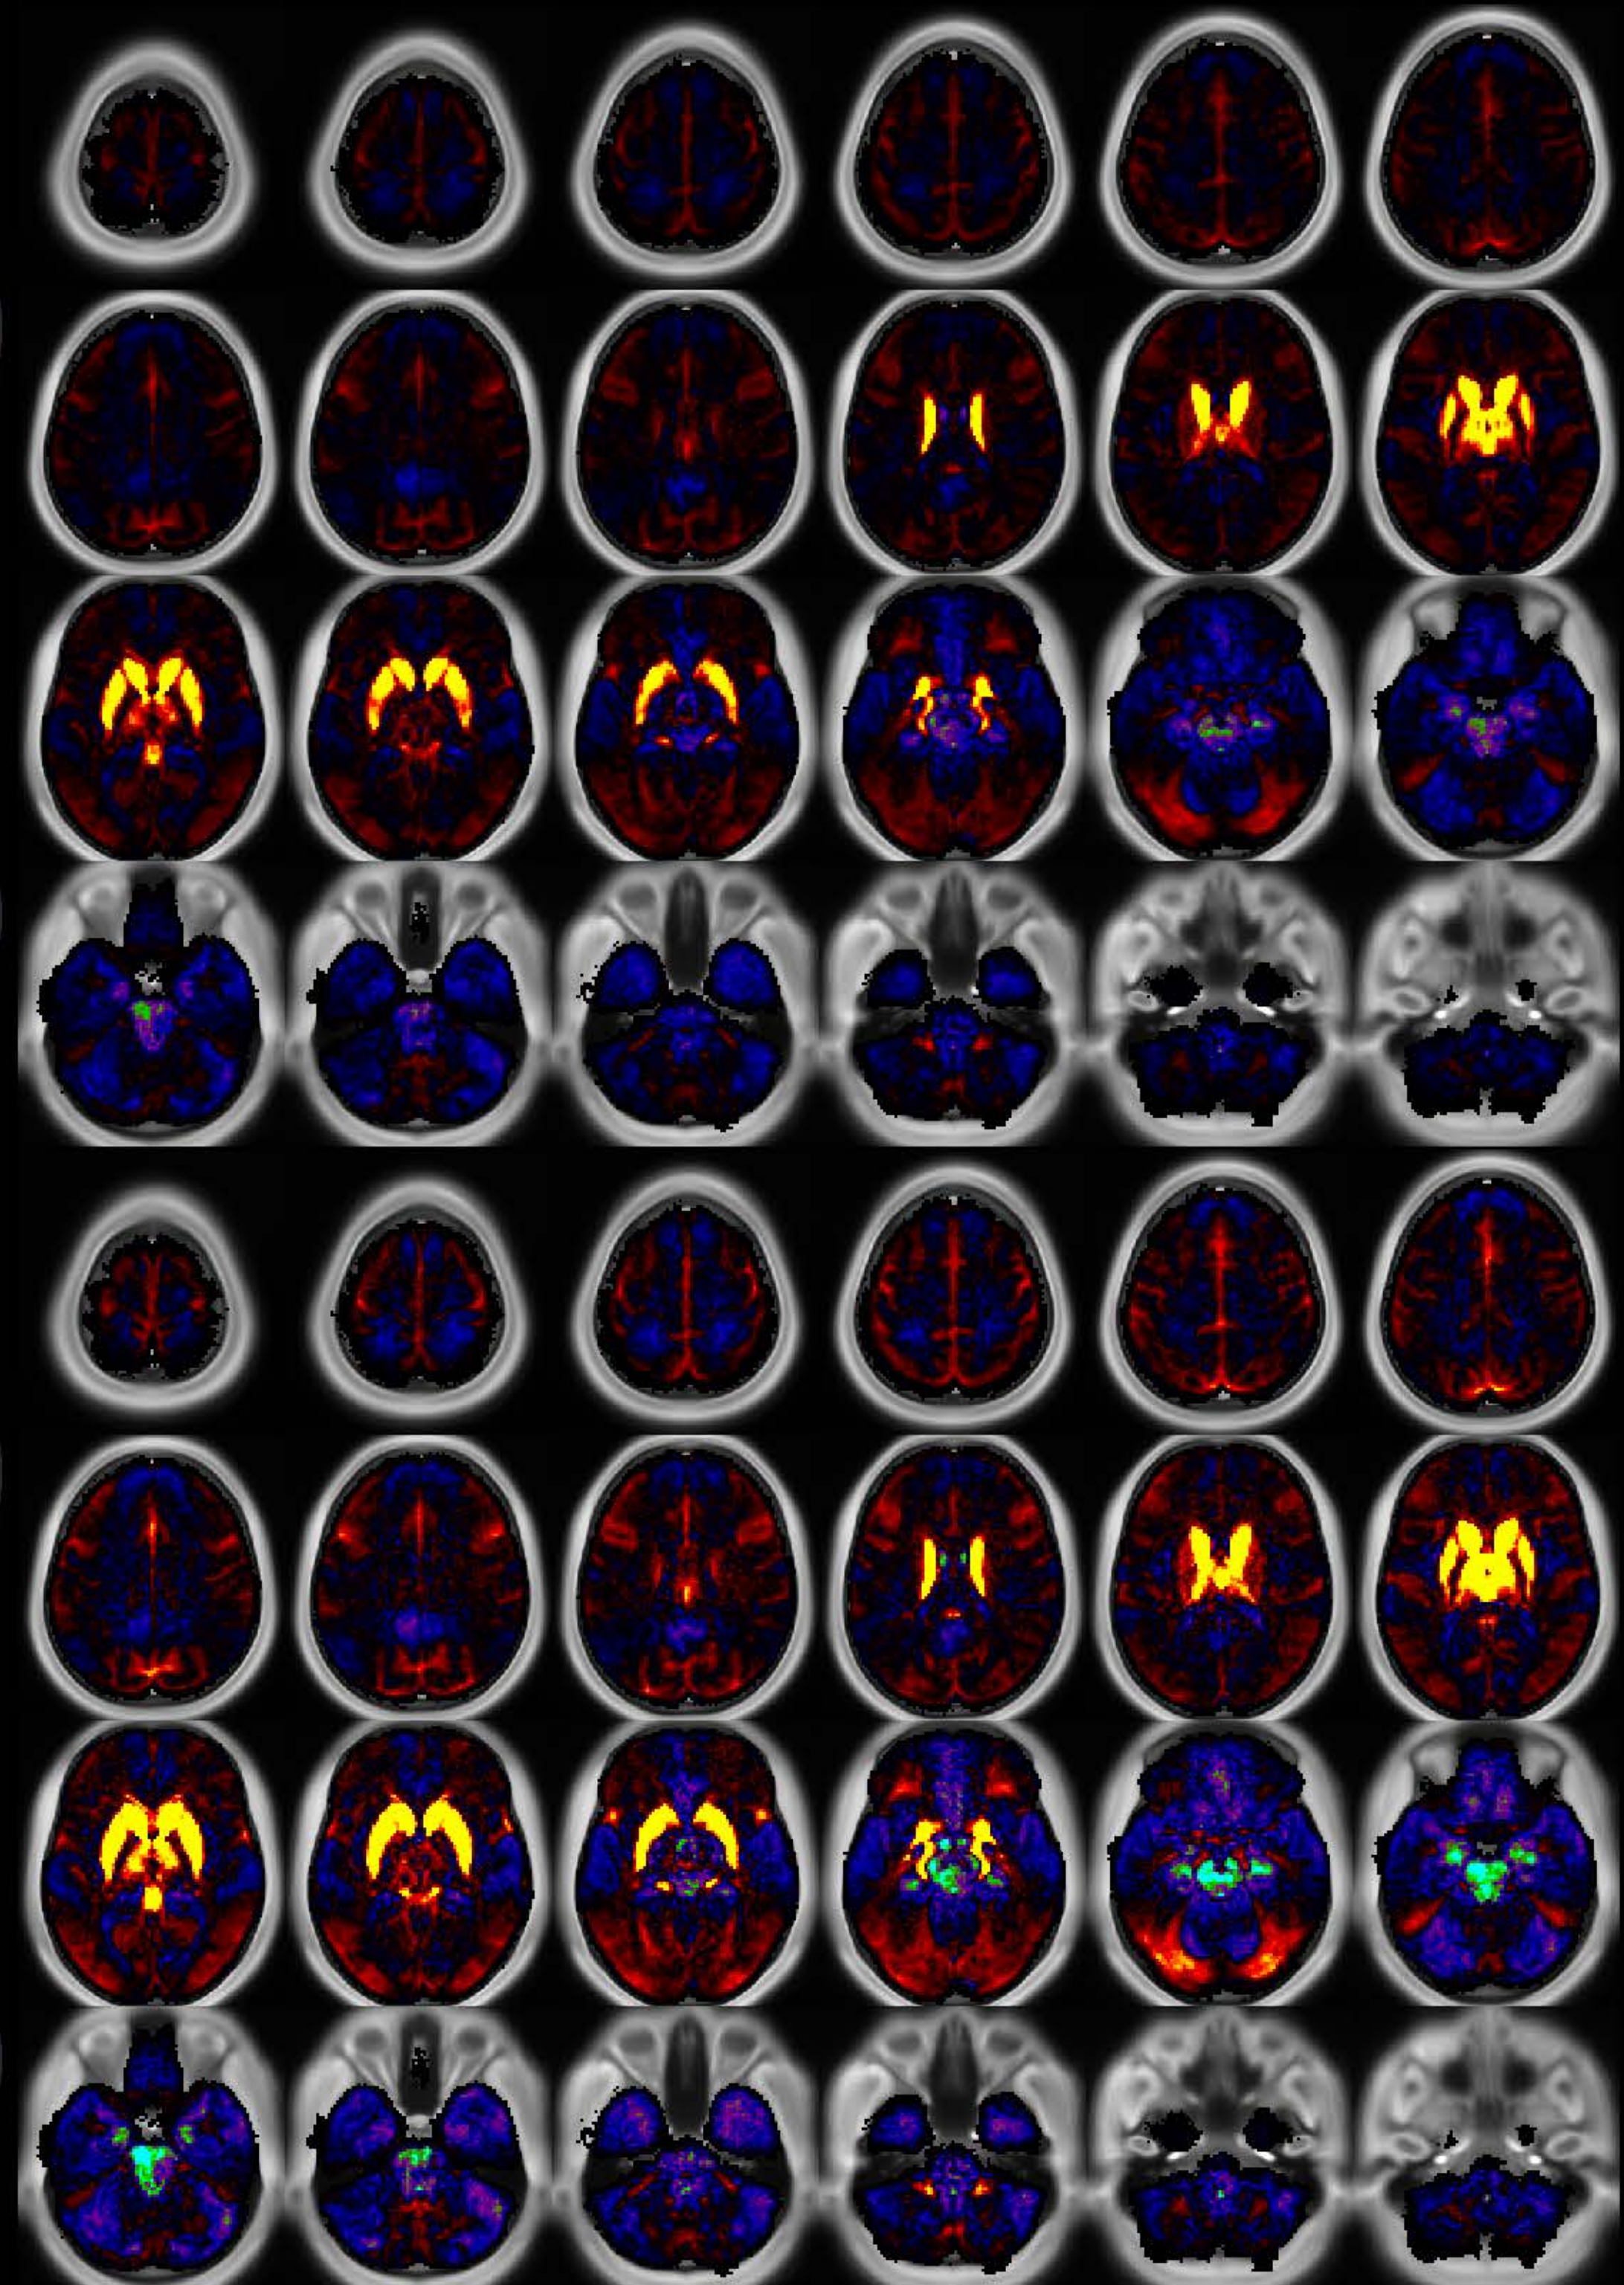

Seconds

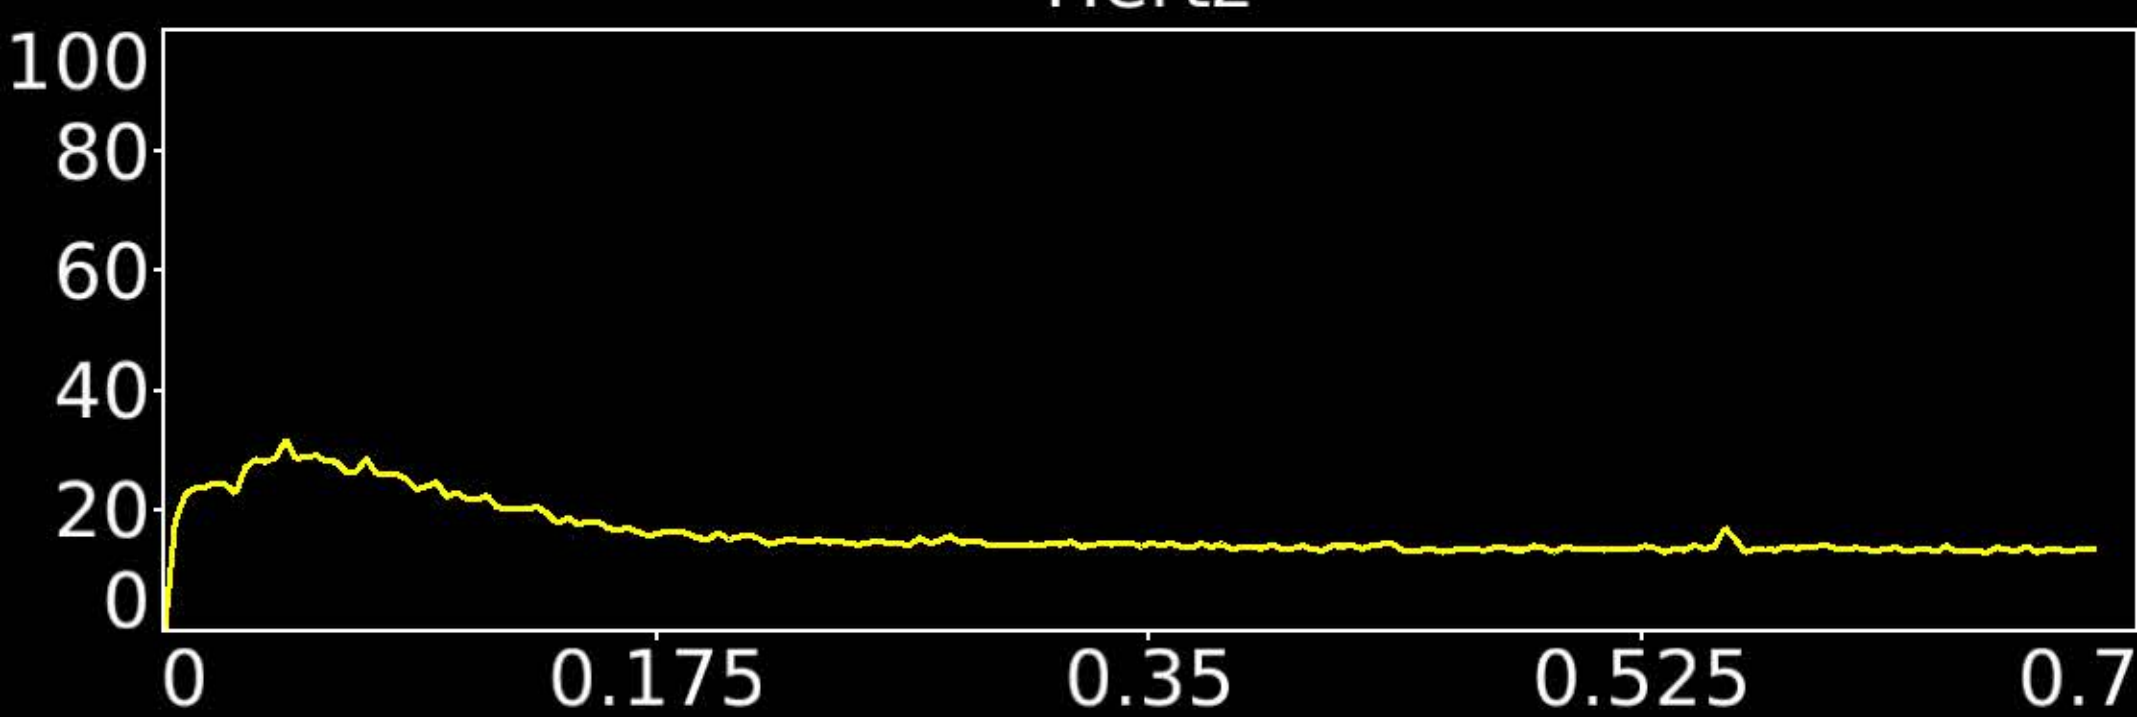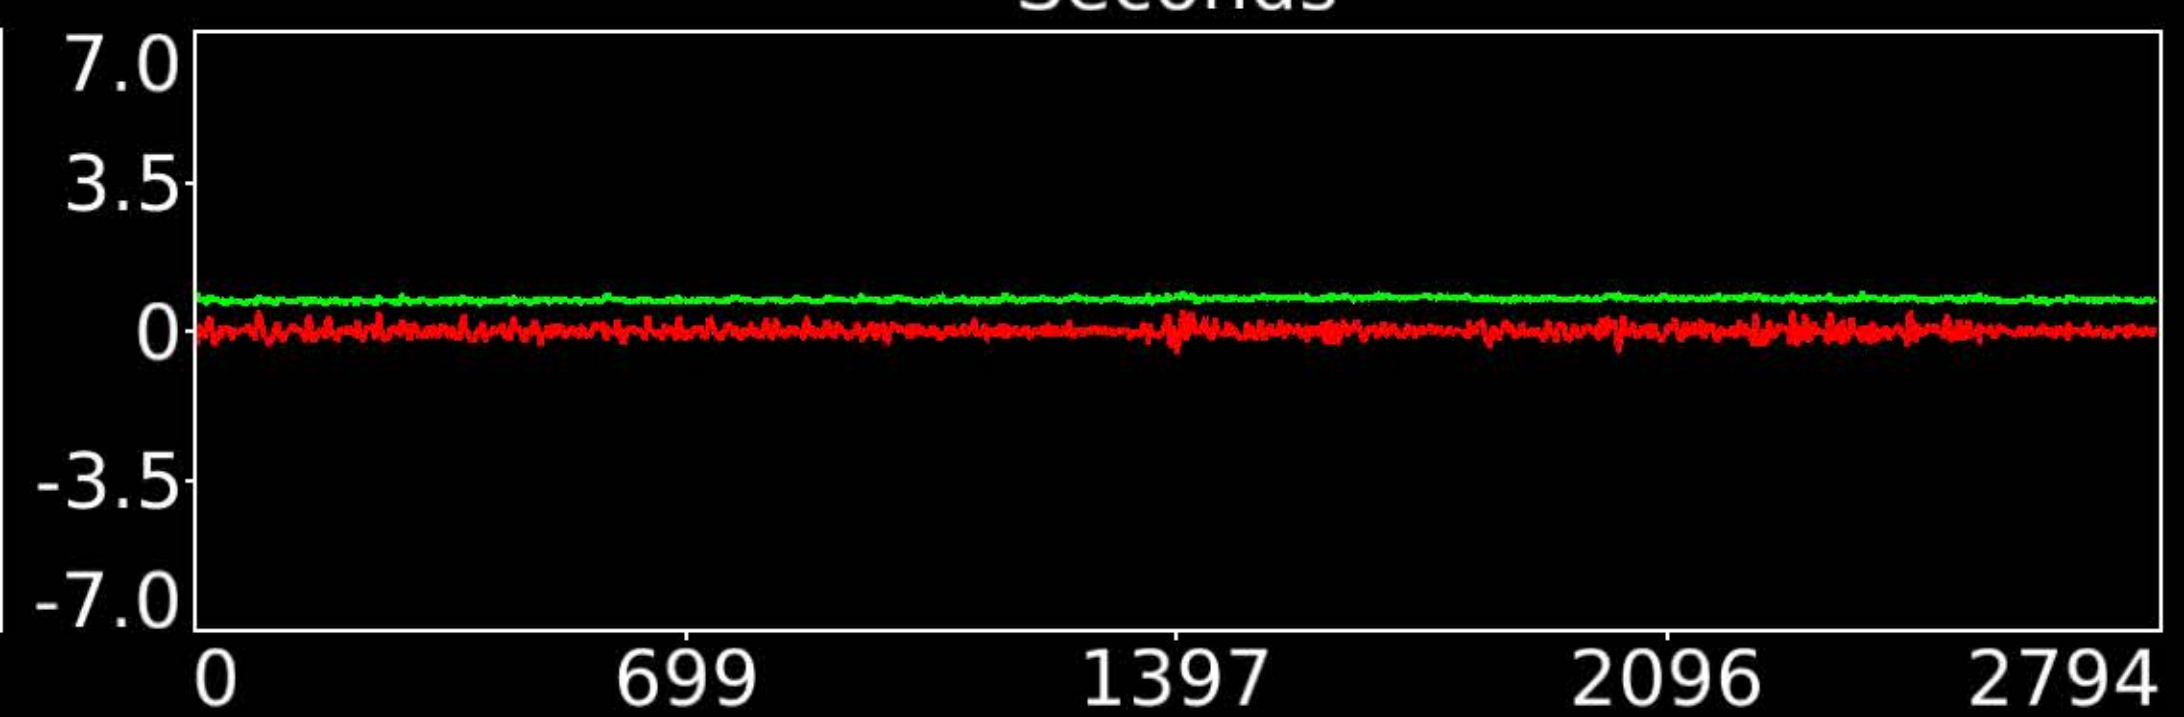

|                          |                            |                                                    |  |
|--------------------------|----------------------------|----------------------------------------------------|--|
| Number & Class: 36 Noise |                            | Name: Striatum and Dorsal + Anterior Thalamus + WM |  |
| RVT Correlated: No       | DVARS Dip Associated: No   | Cross-Subject Variable: No                         |  |
| Single Subject: No       | % Variance Explained: 1.04 | Globality Index: 0.35                              |  |
| Task Component: 42       | Rest Component: 44         | Task Modulated: No                                 |  |

Rationale: Controversial: Diencephalon together with surrounding white matter positive vs rest of brain negative; could be due to differing vascular supplies



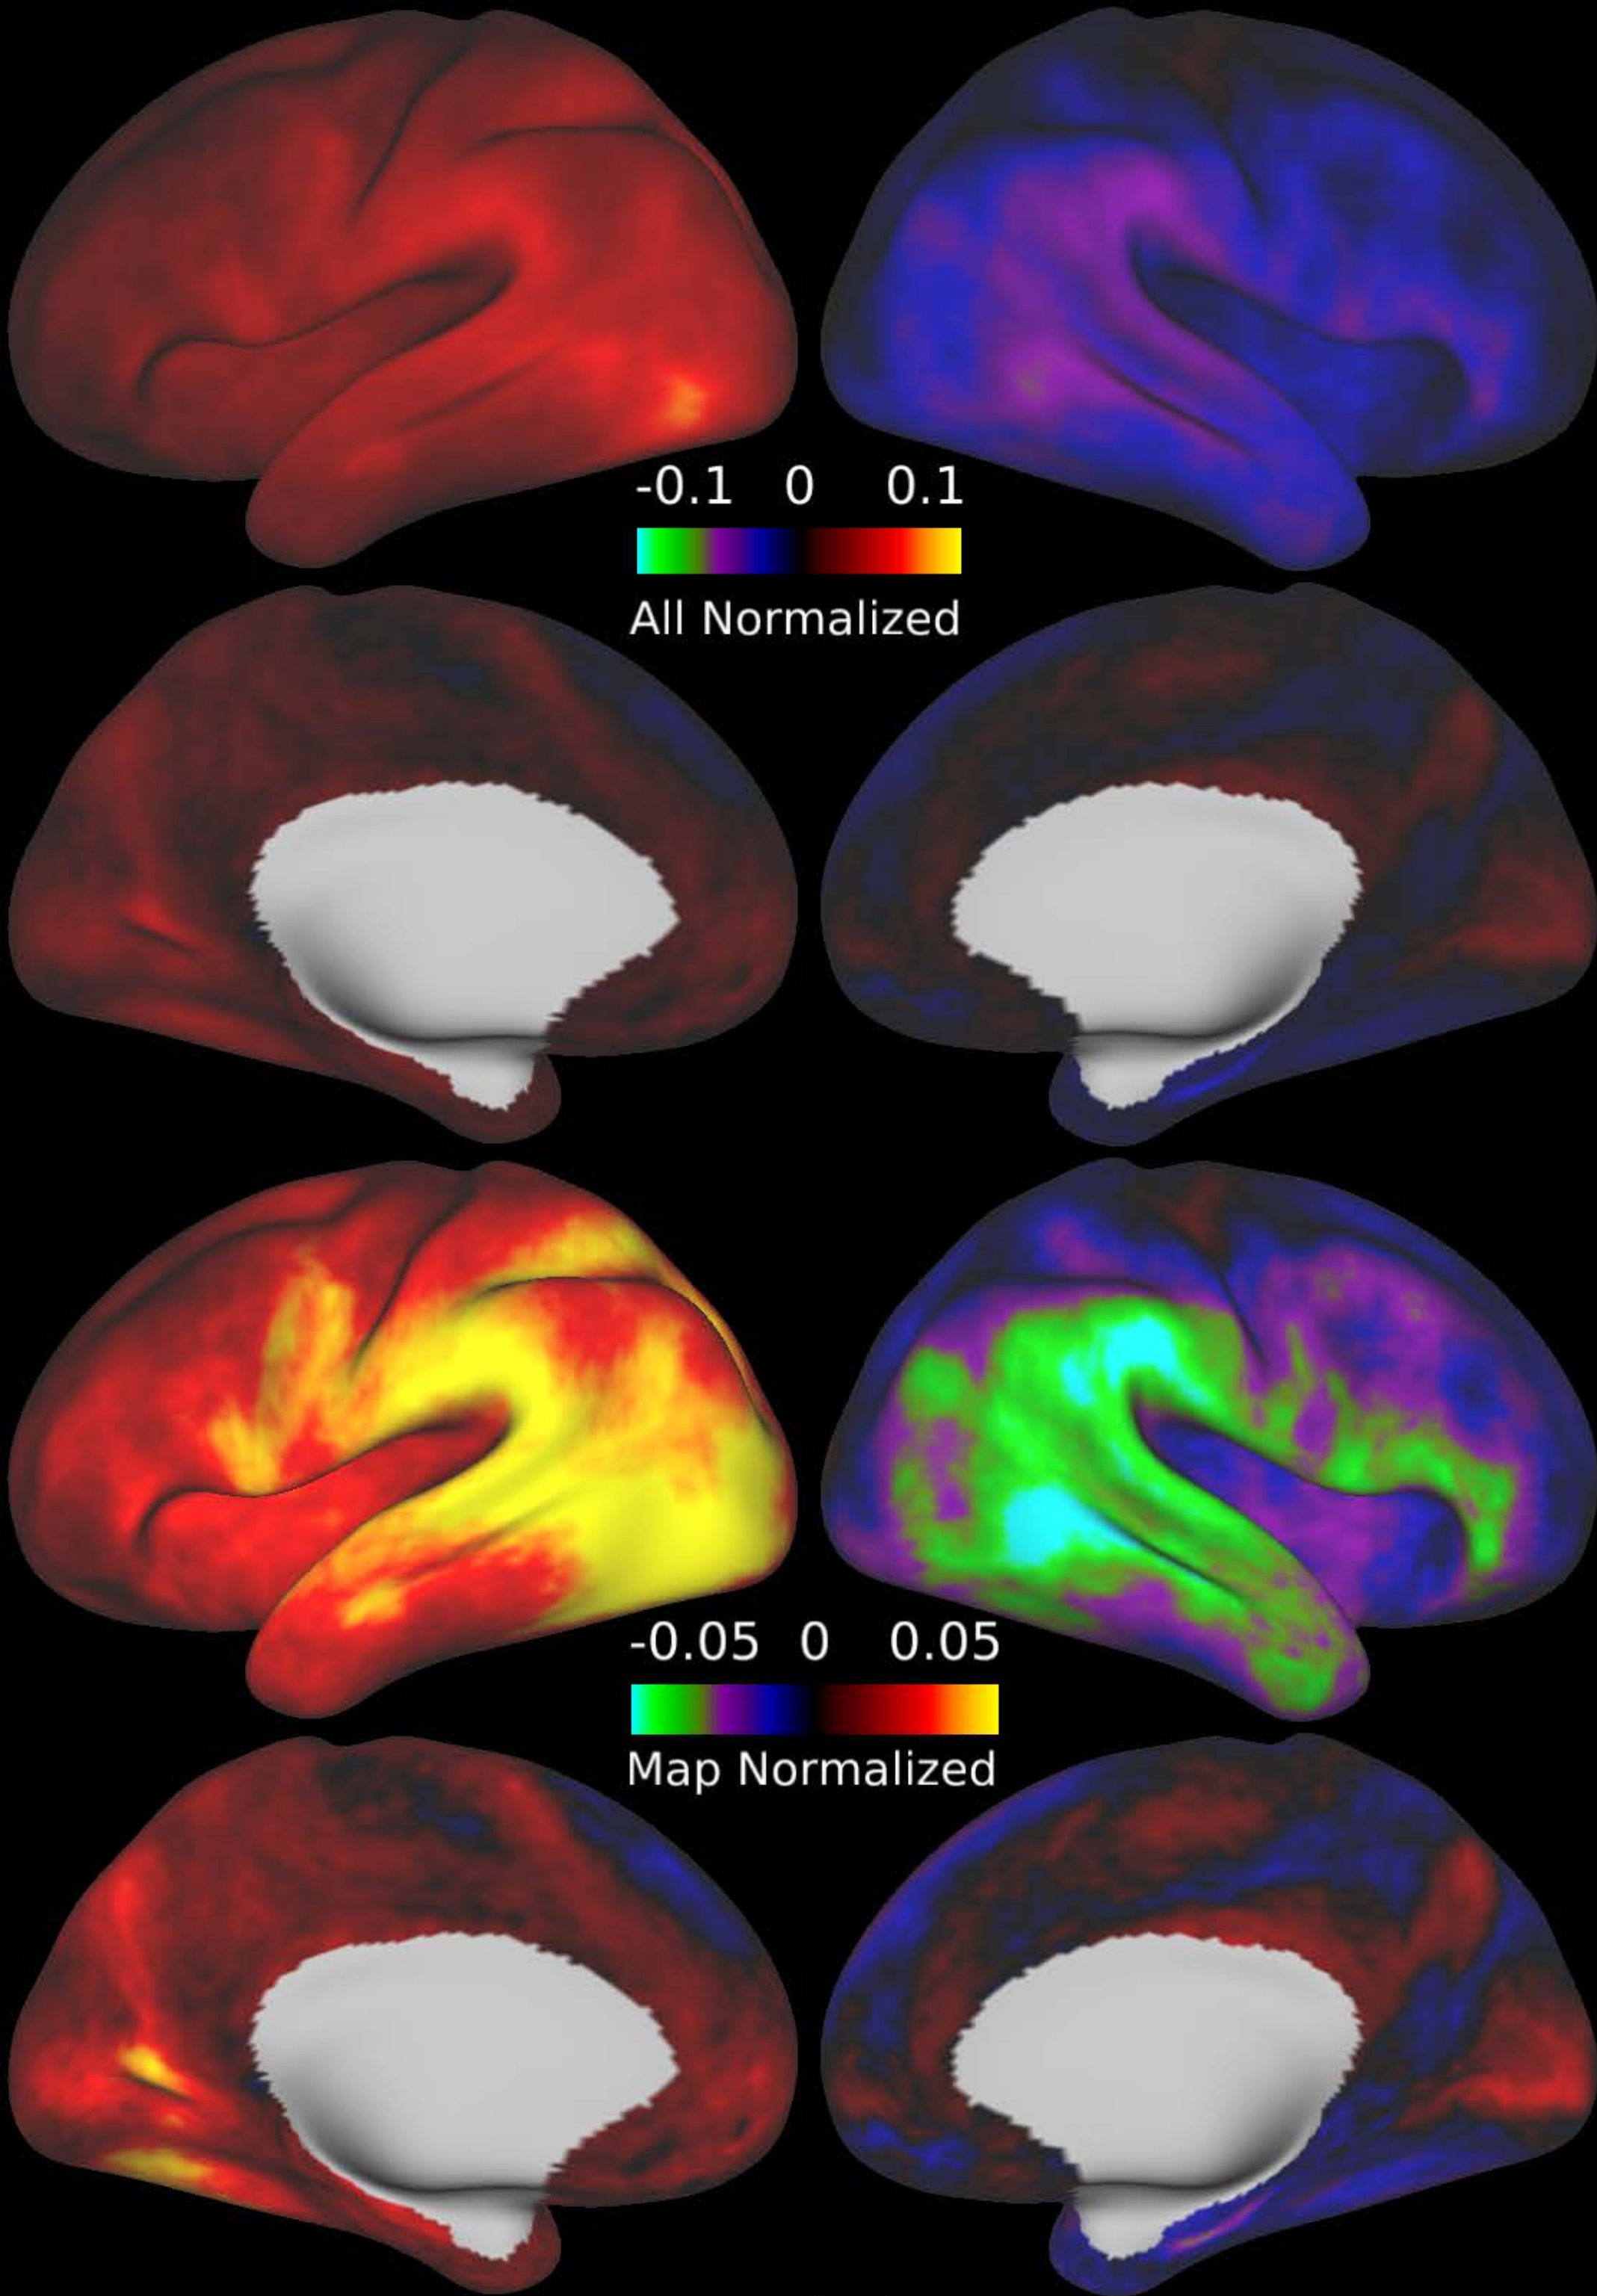

Hertz

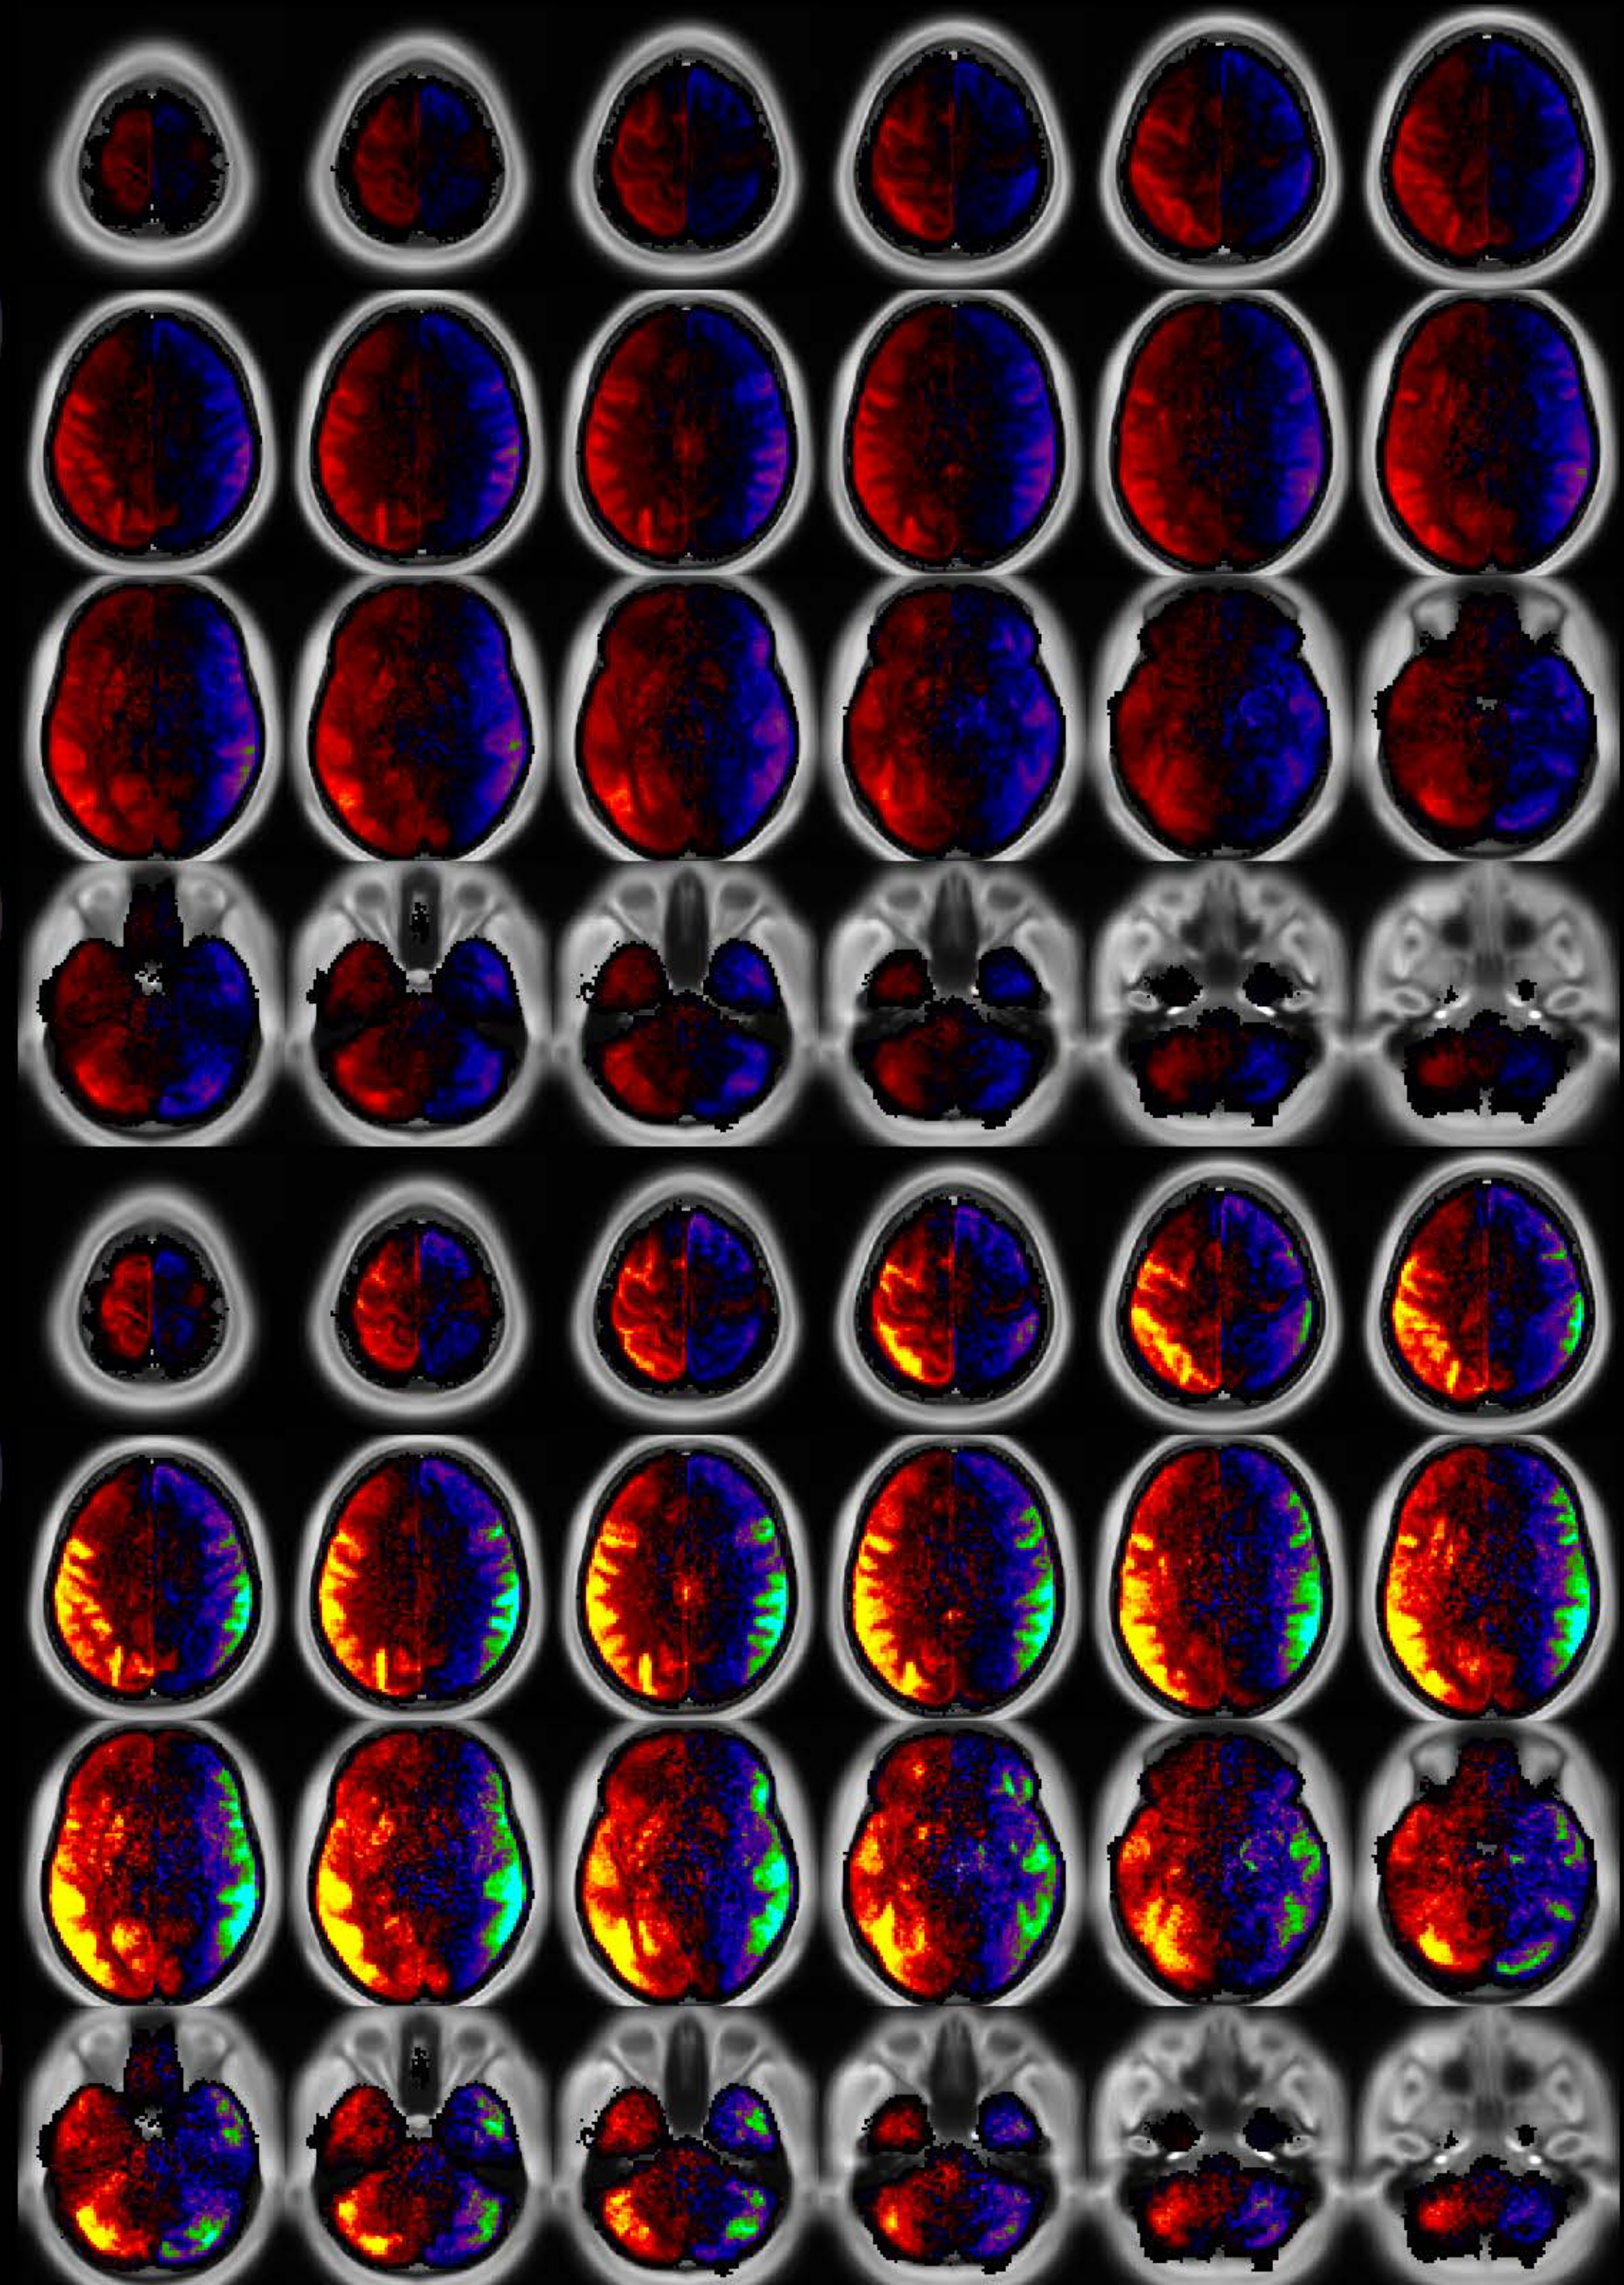

Seconds

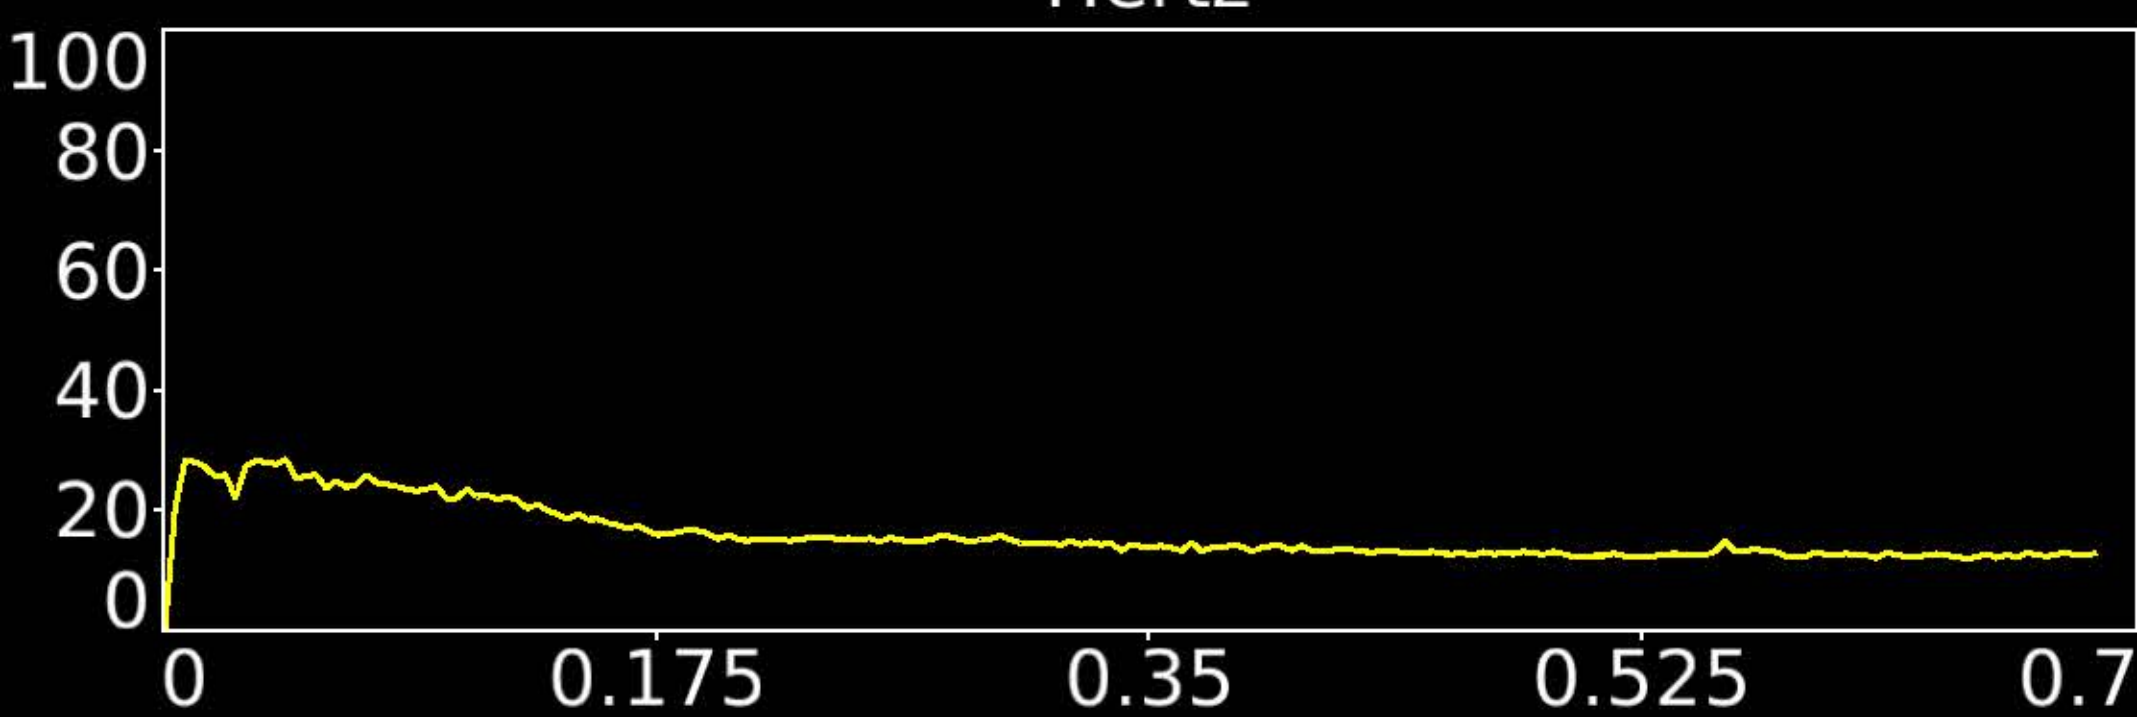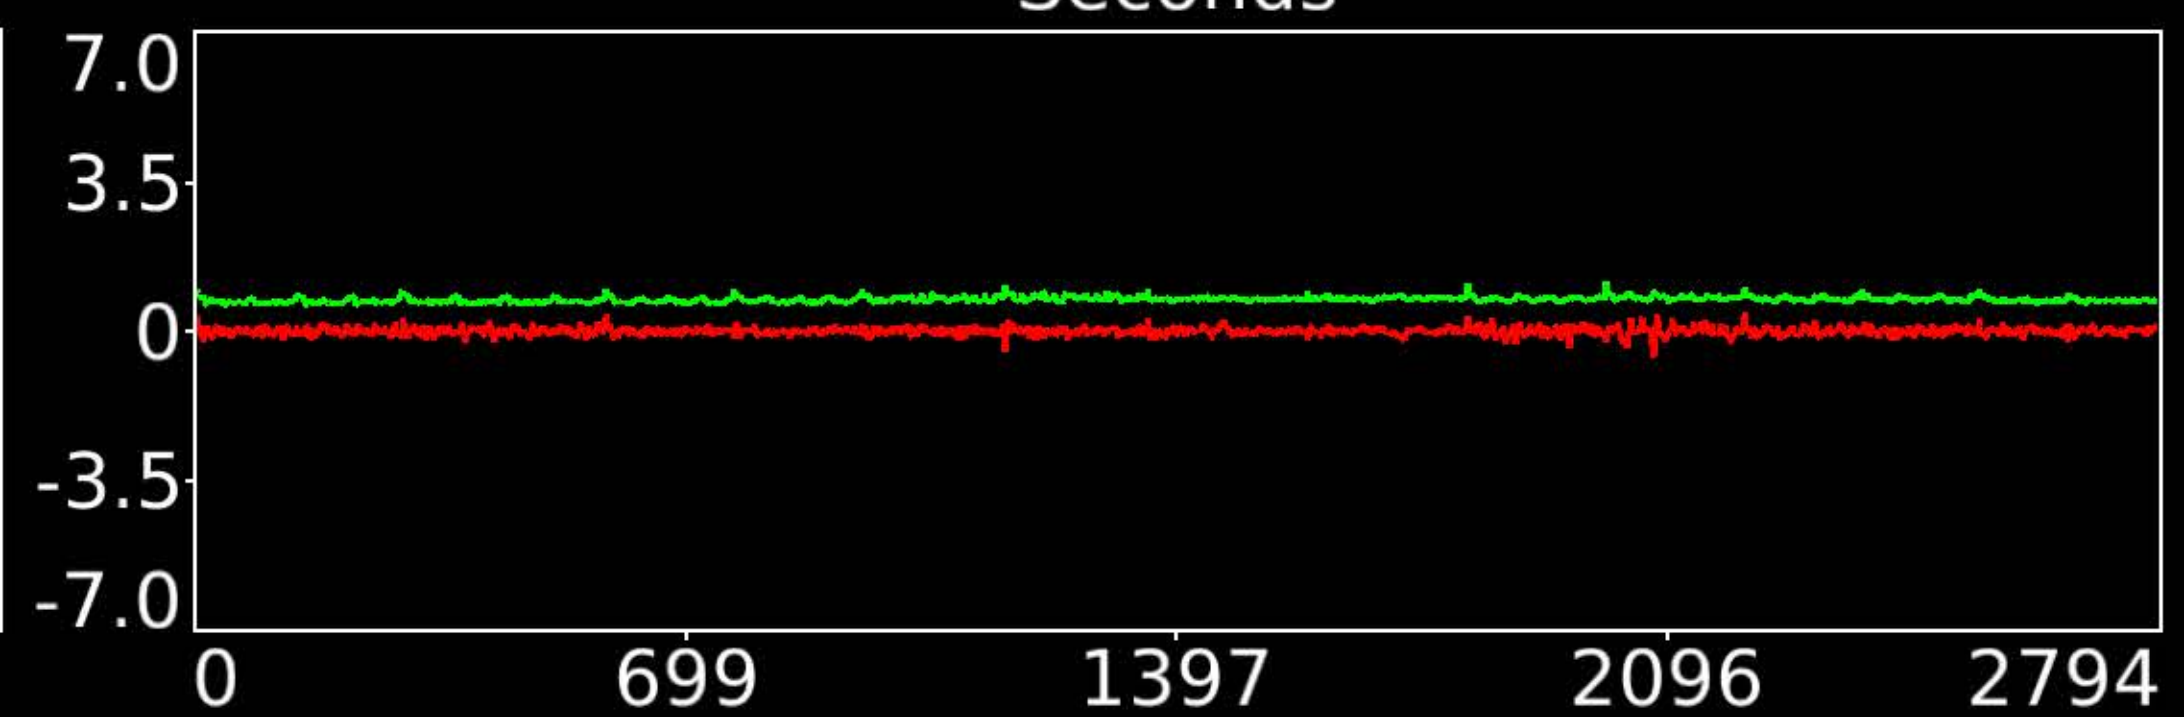

|                                                                                                        |                            |                             |  |
|--------------------------------------------------------------------------------------------------------|----------------------------|-----------------------------|--|
| Number & Class: 37 Noise                                                                               |                            | Name: L>R Movement Artifact |  |
| RVT Correlated: No                                                                                     | DVARS Dip Associated: Yes  | Cross-Subject Variable: No  |  |
| Single Subject: No                                                                                     | % Variance Explained: 1.05 | Globality Index: 0.47       |  |
| Task Component: 51                                                                                     | Rest Component: 50         | Task Modulated: No          |  |
| Rationale: Highly DVARS Dips associated component; looks like movement regressor beta map (Z rotation) |                            |                             |  |



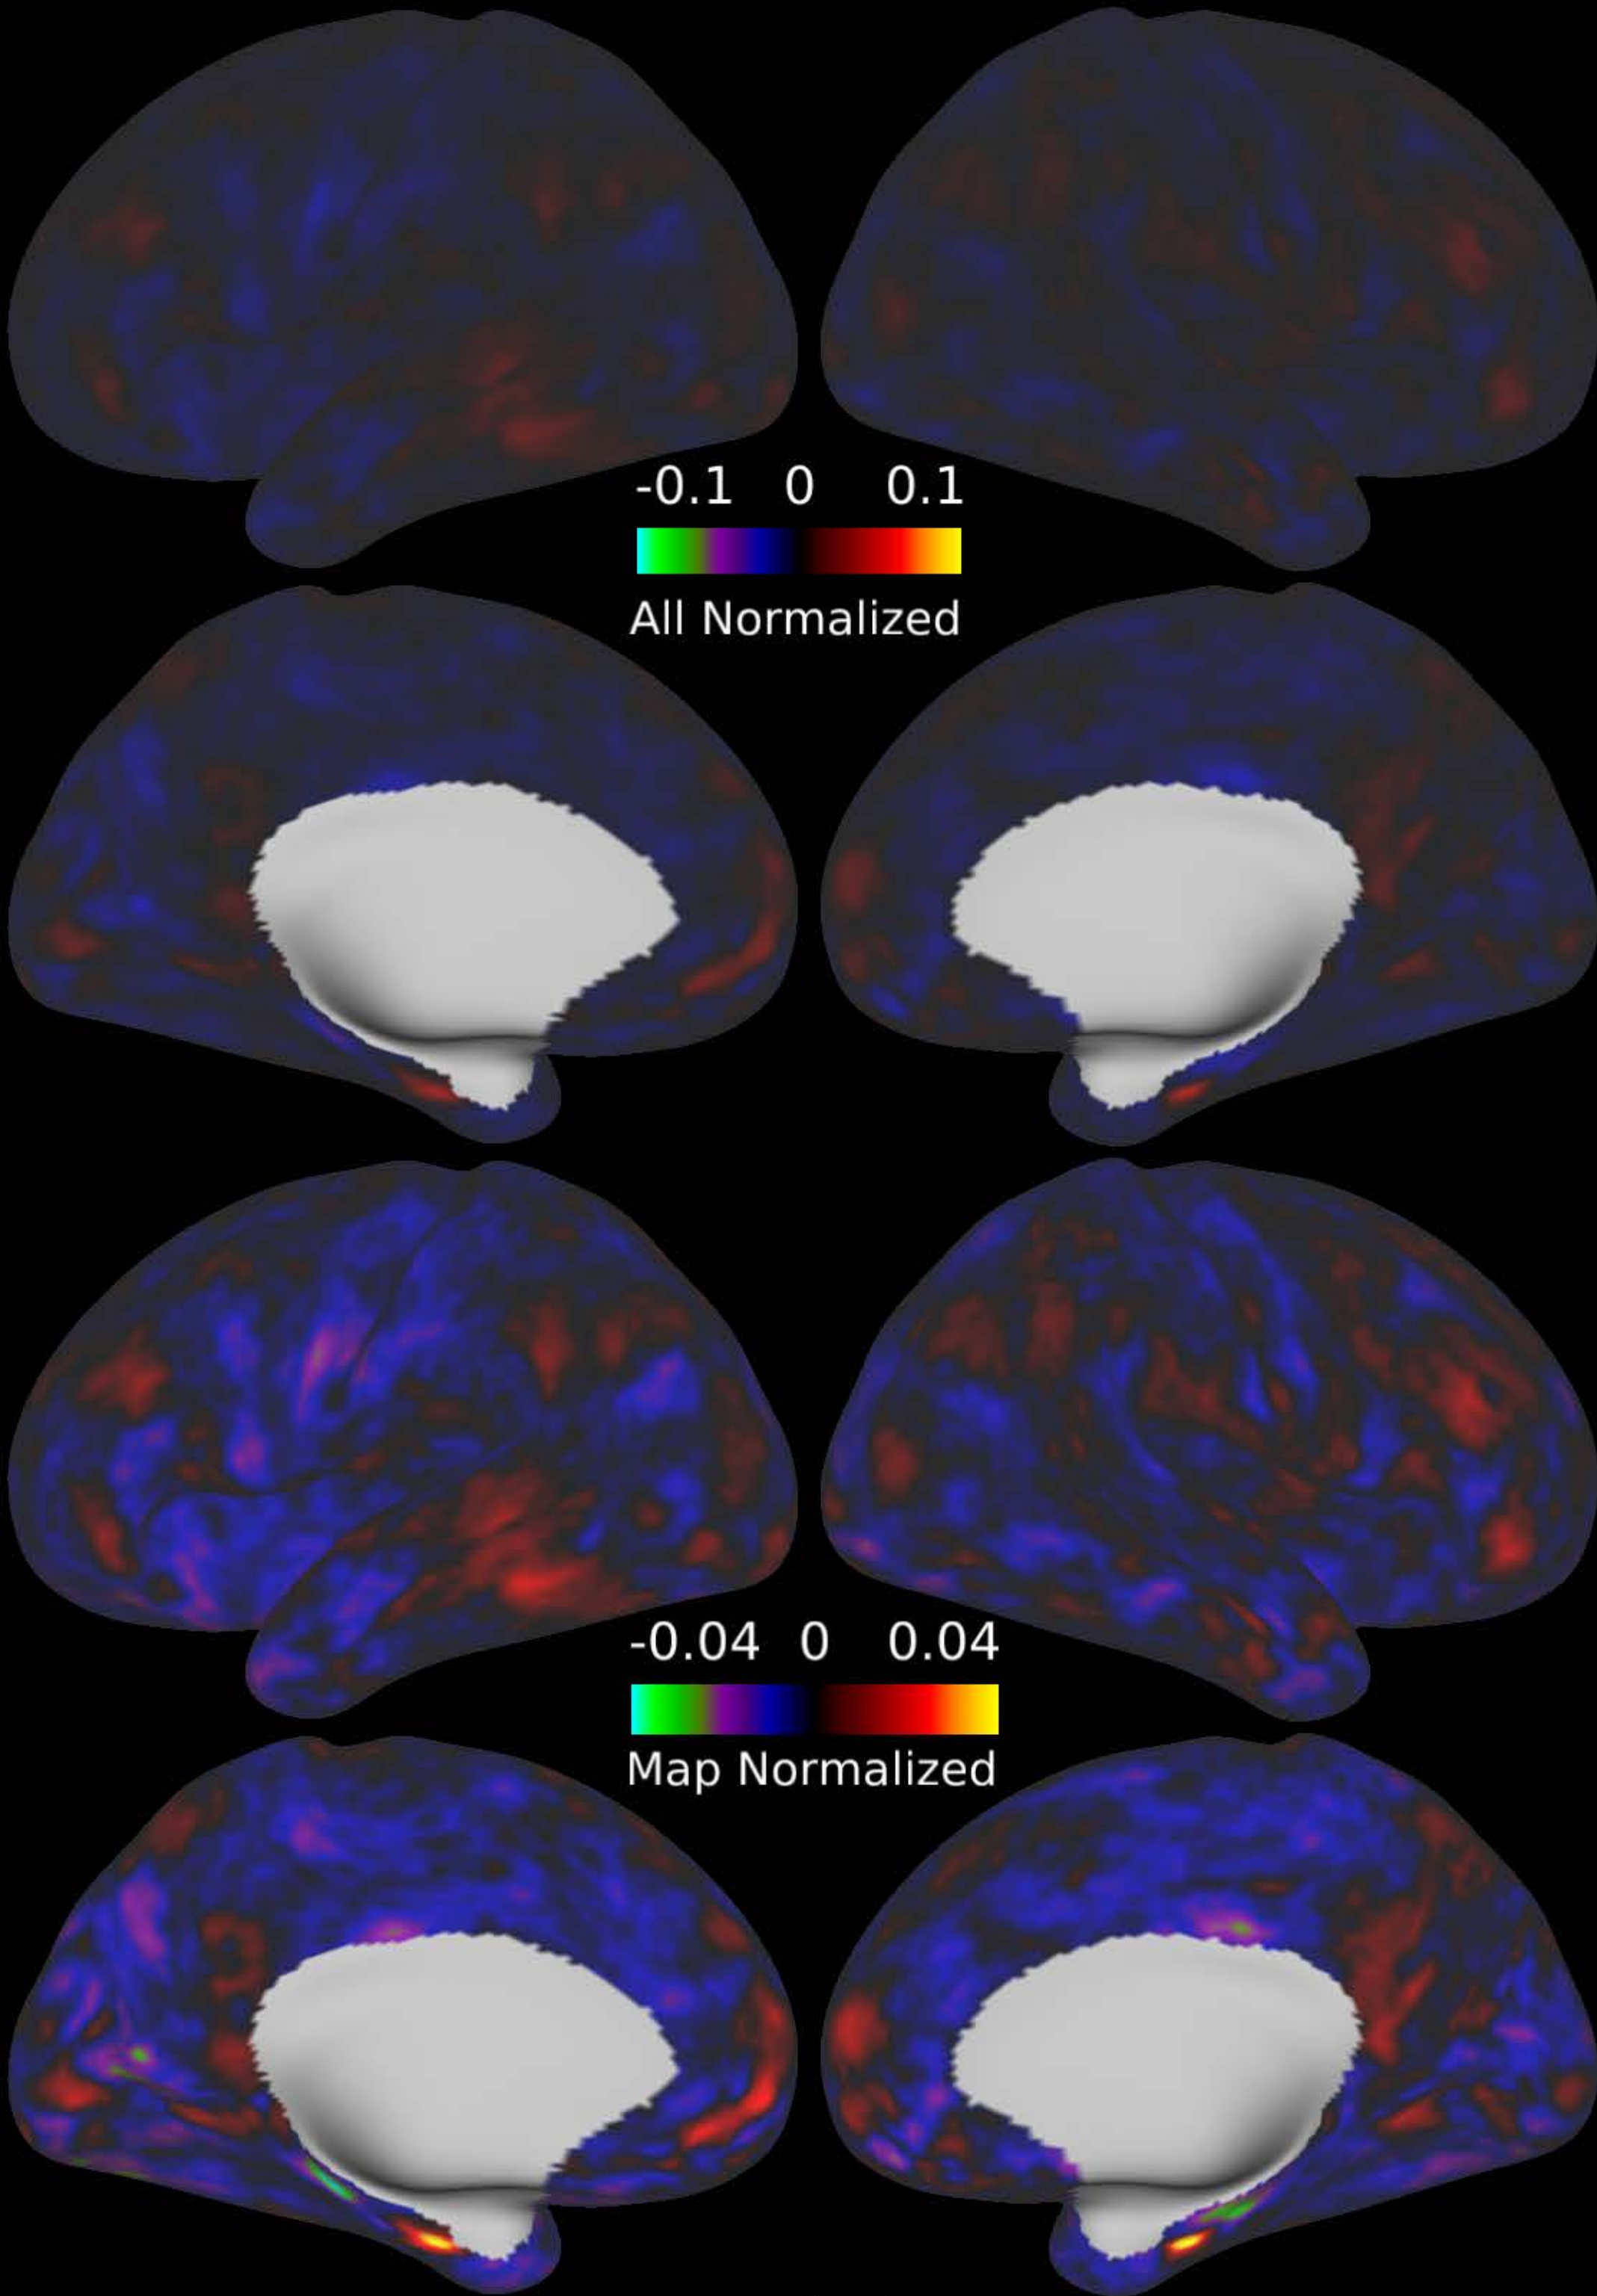

Hertz

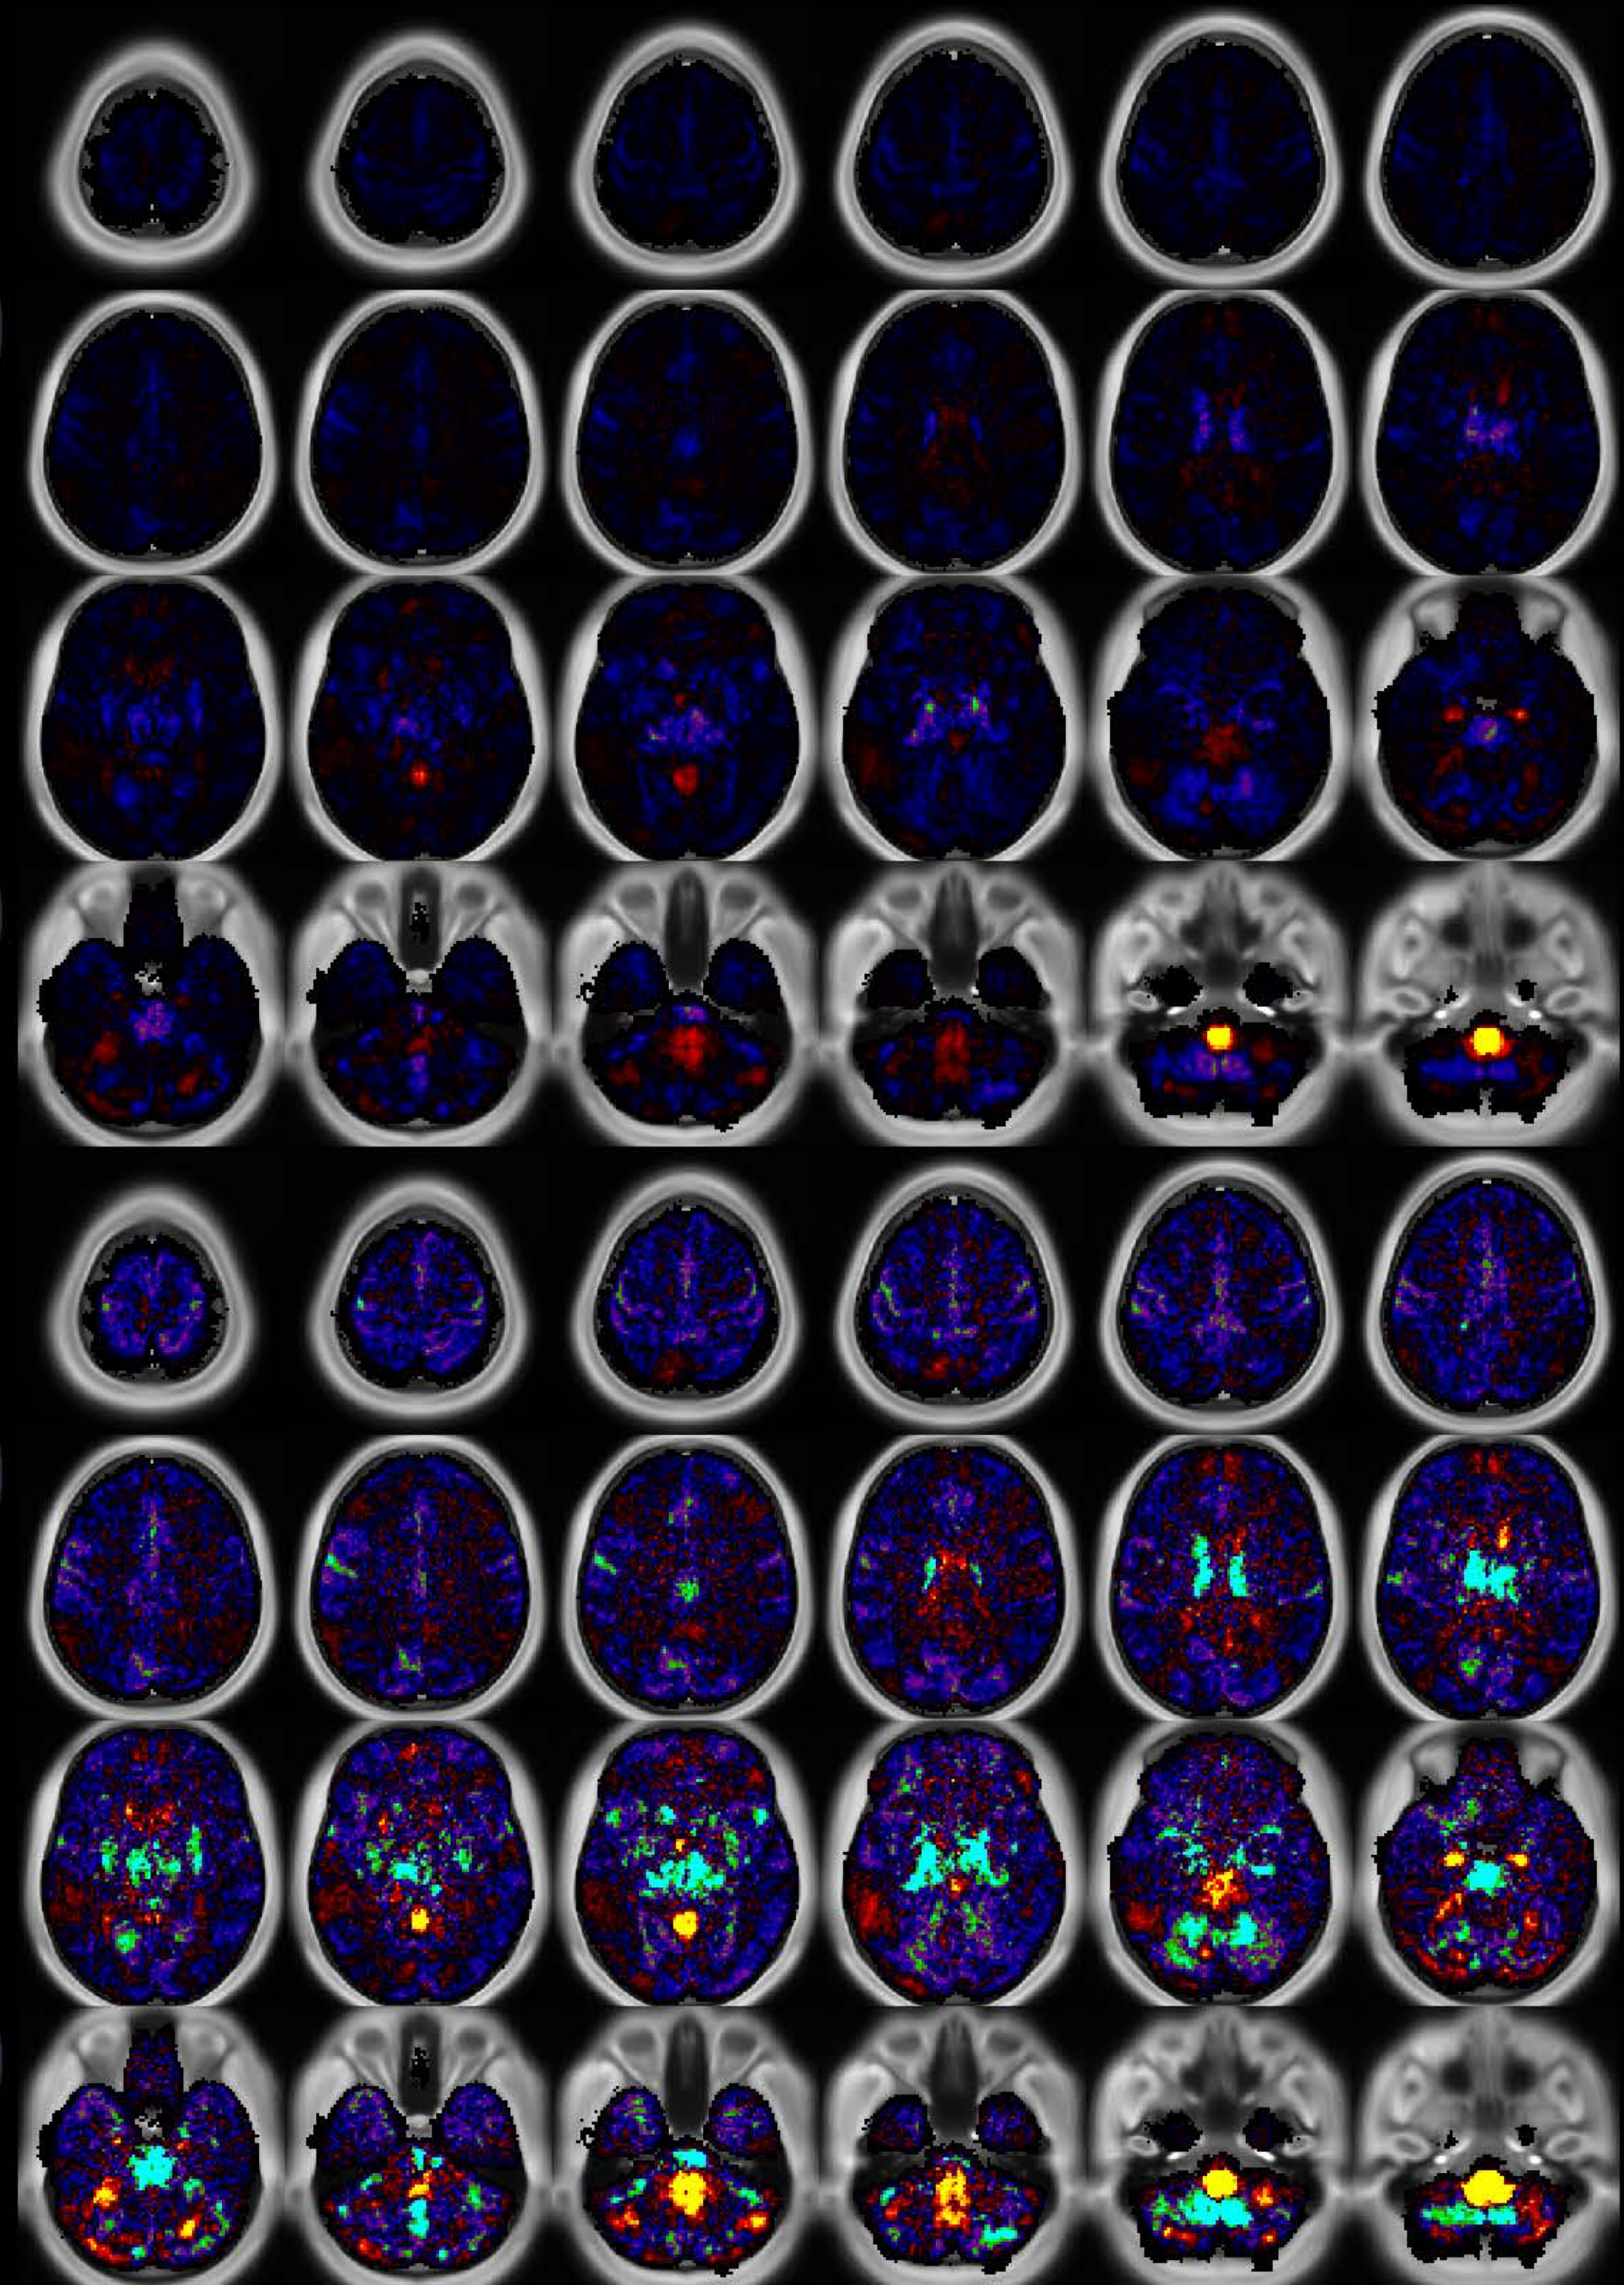

Seconds

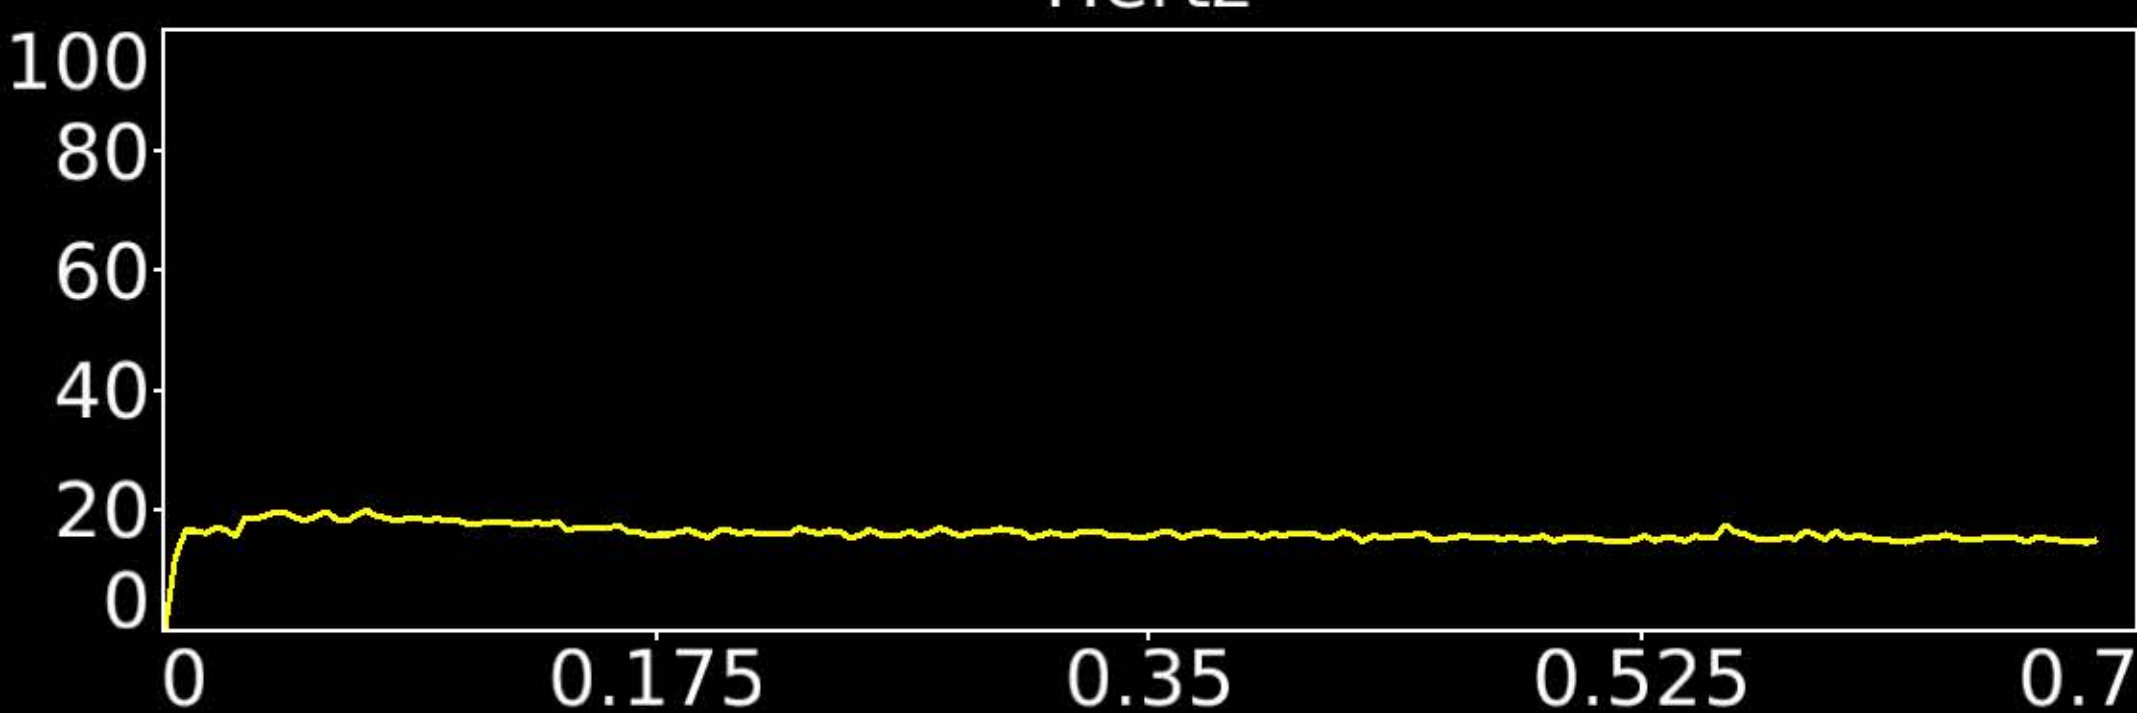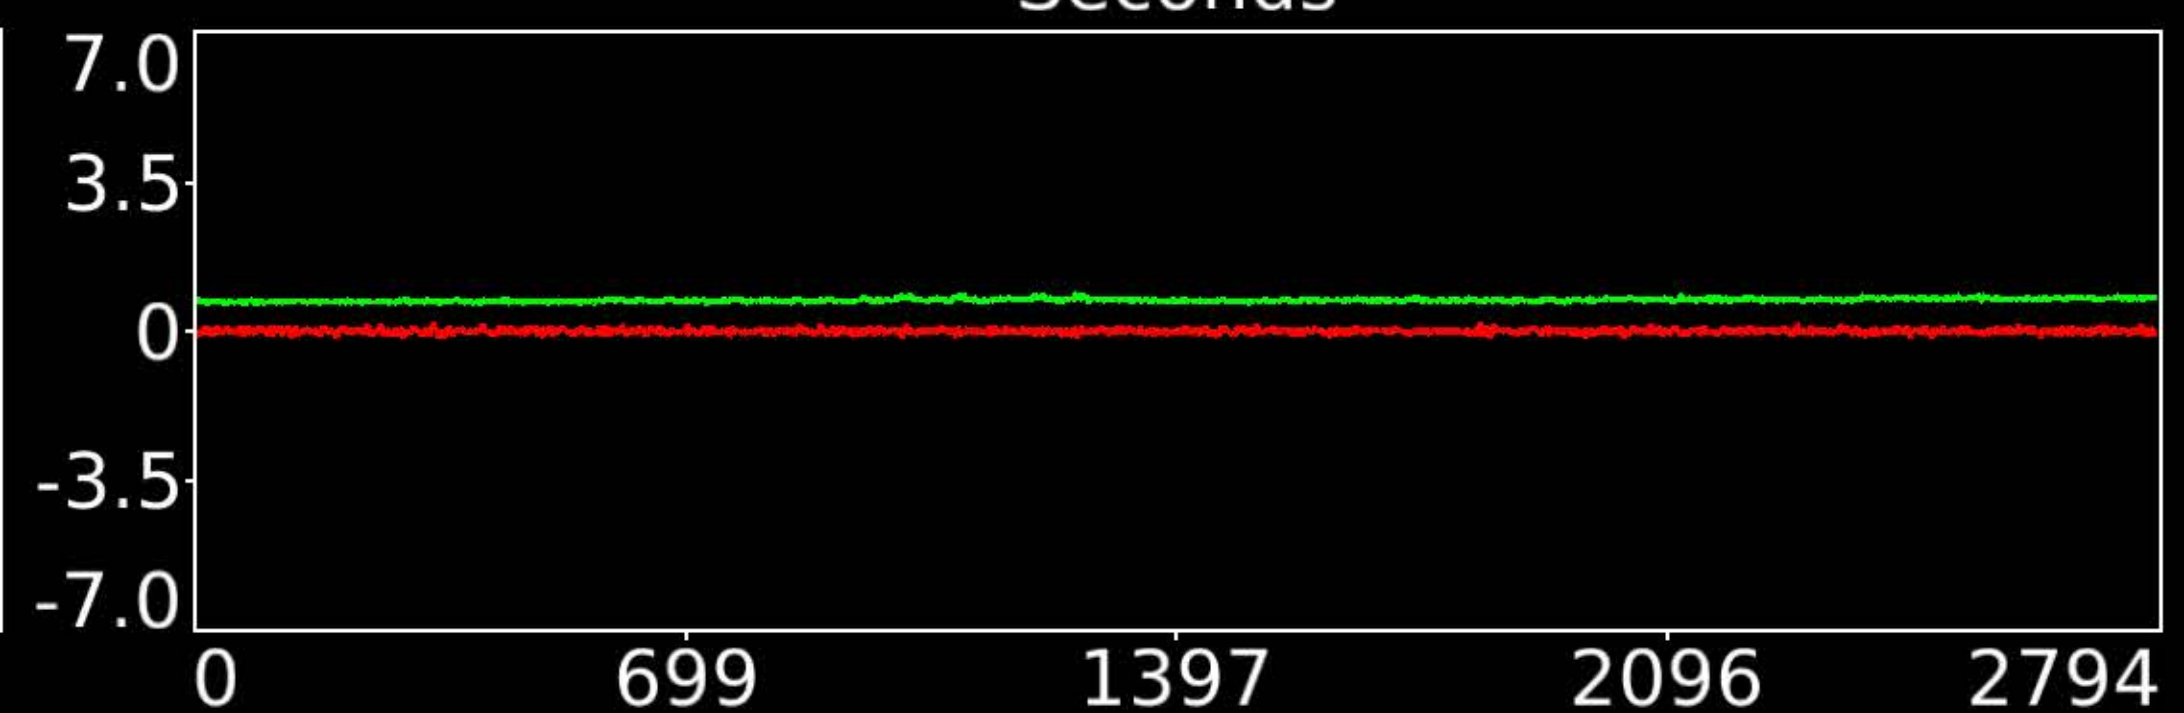

|                          |                            |                              |  |
|--------------------------|----------------------------|------------------------------|--|
| Number & Class: 38 Noise |                            | Name: Medulla Recon Artifact |  |
| RVT Correlated: No       | DVARS Dip Associated: Yes  | Cross-Subject Variable: Yes  |  |
| Single Subject: No       | % Variance Explained: 1.05 | Globality Index: 1.53        |  |
| Task Component: 43       | Rest Component: 46         | Task Modulated: No           |  |

Rationale: Spatial map not reflective of known areas or RSNs without connectivity to other brain structures; some banding in sagittal plane suggestive of multi-band recon



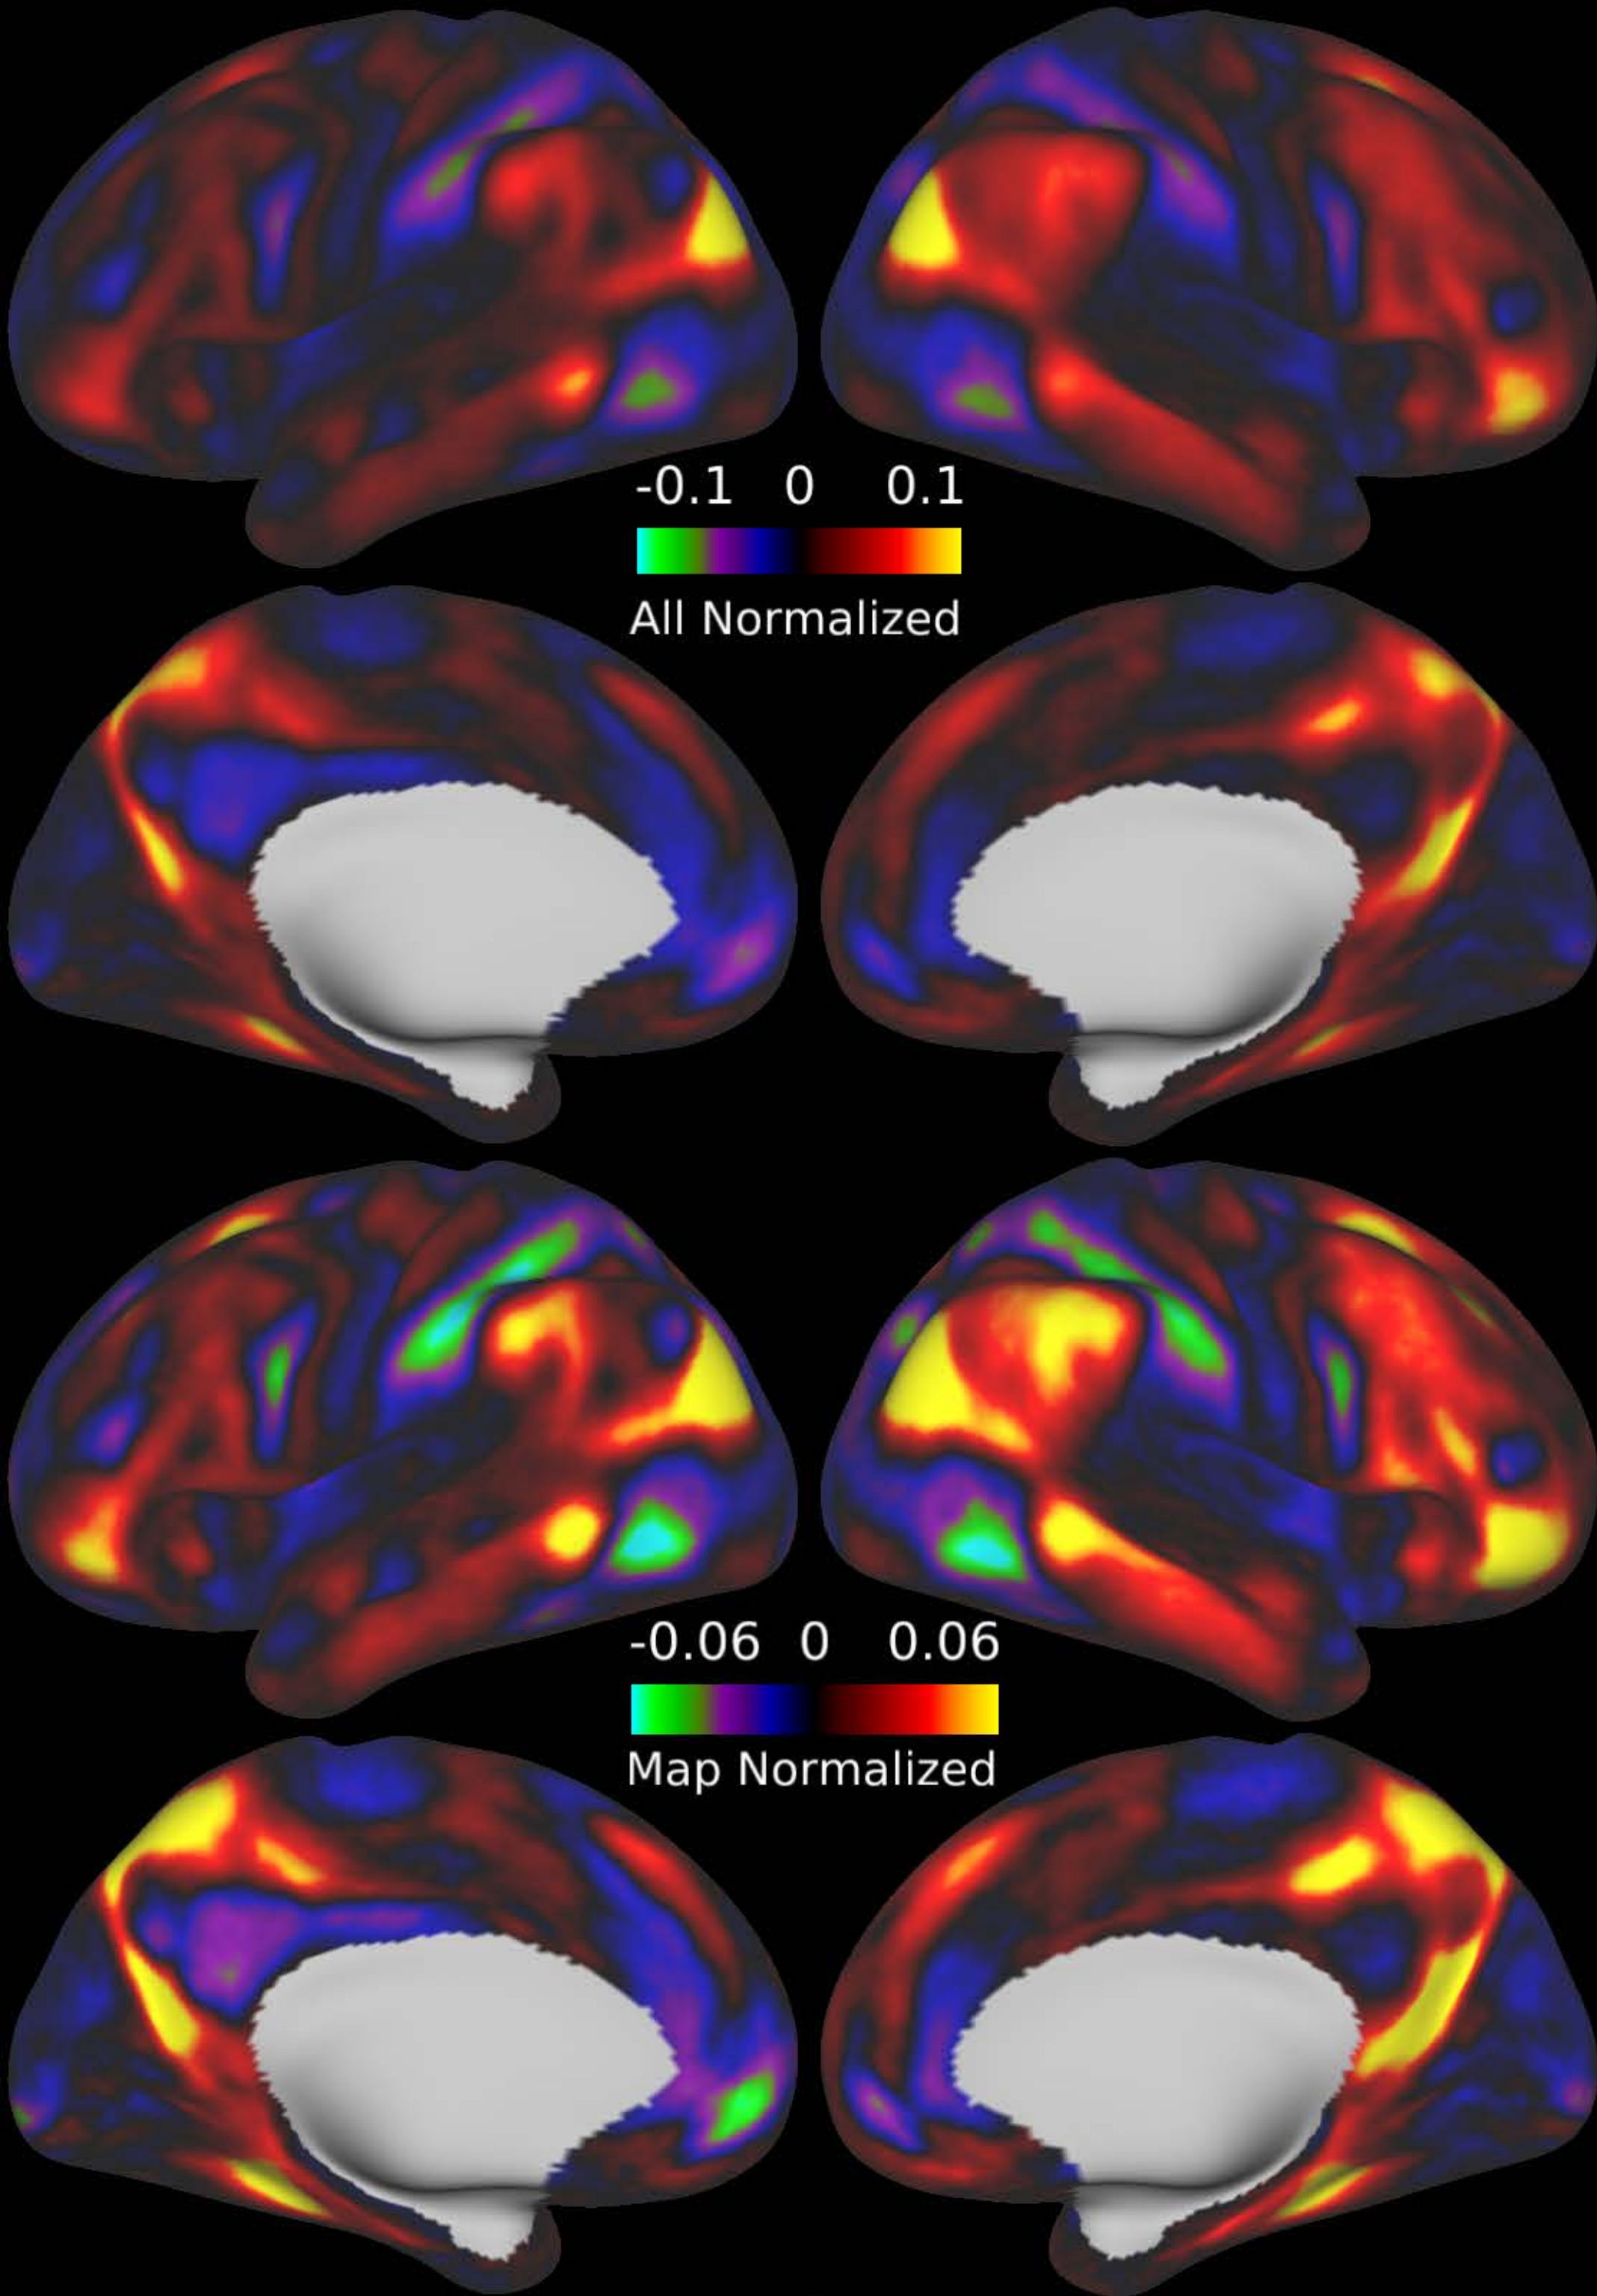

Hertz

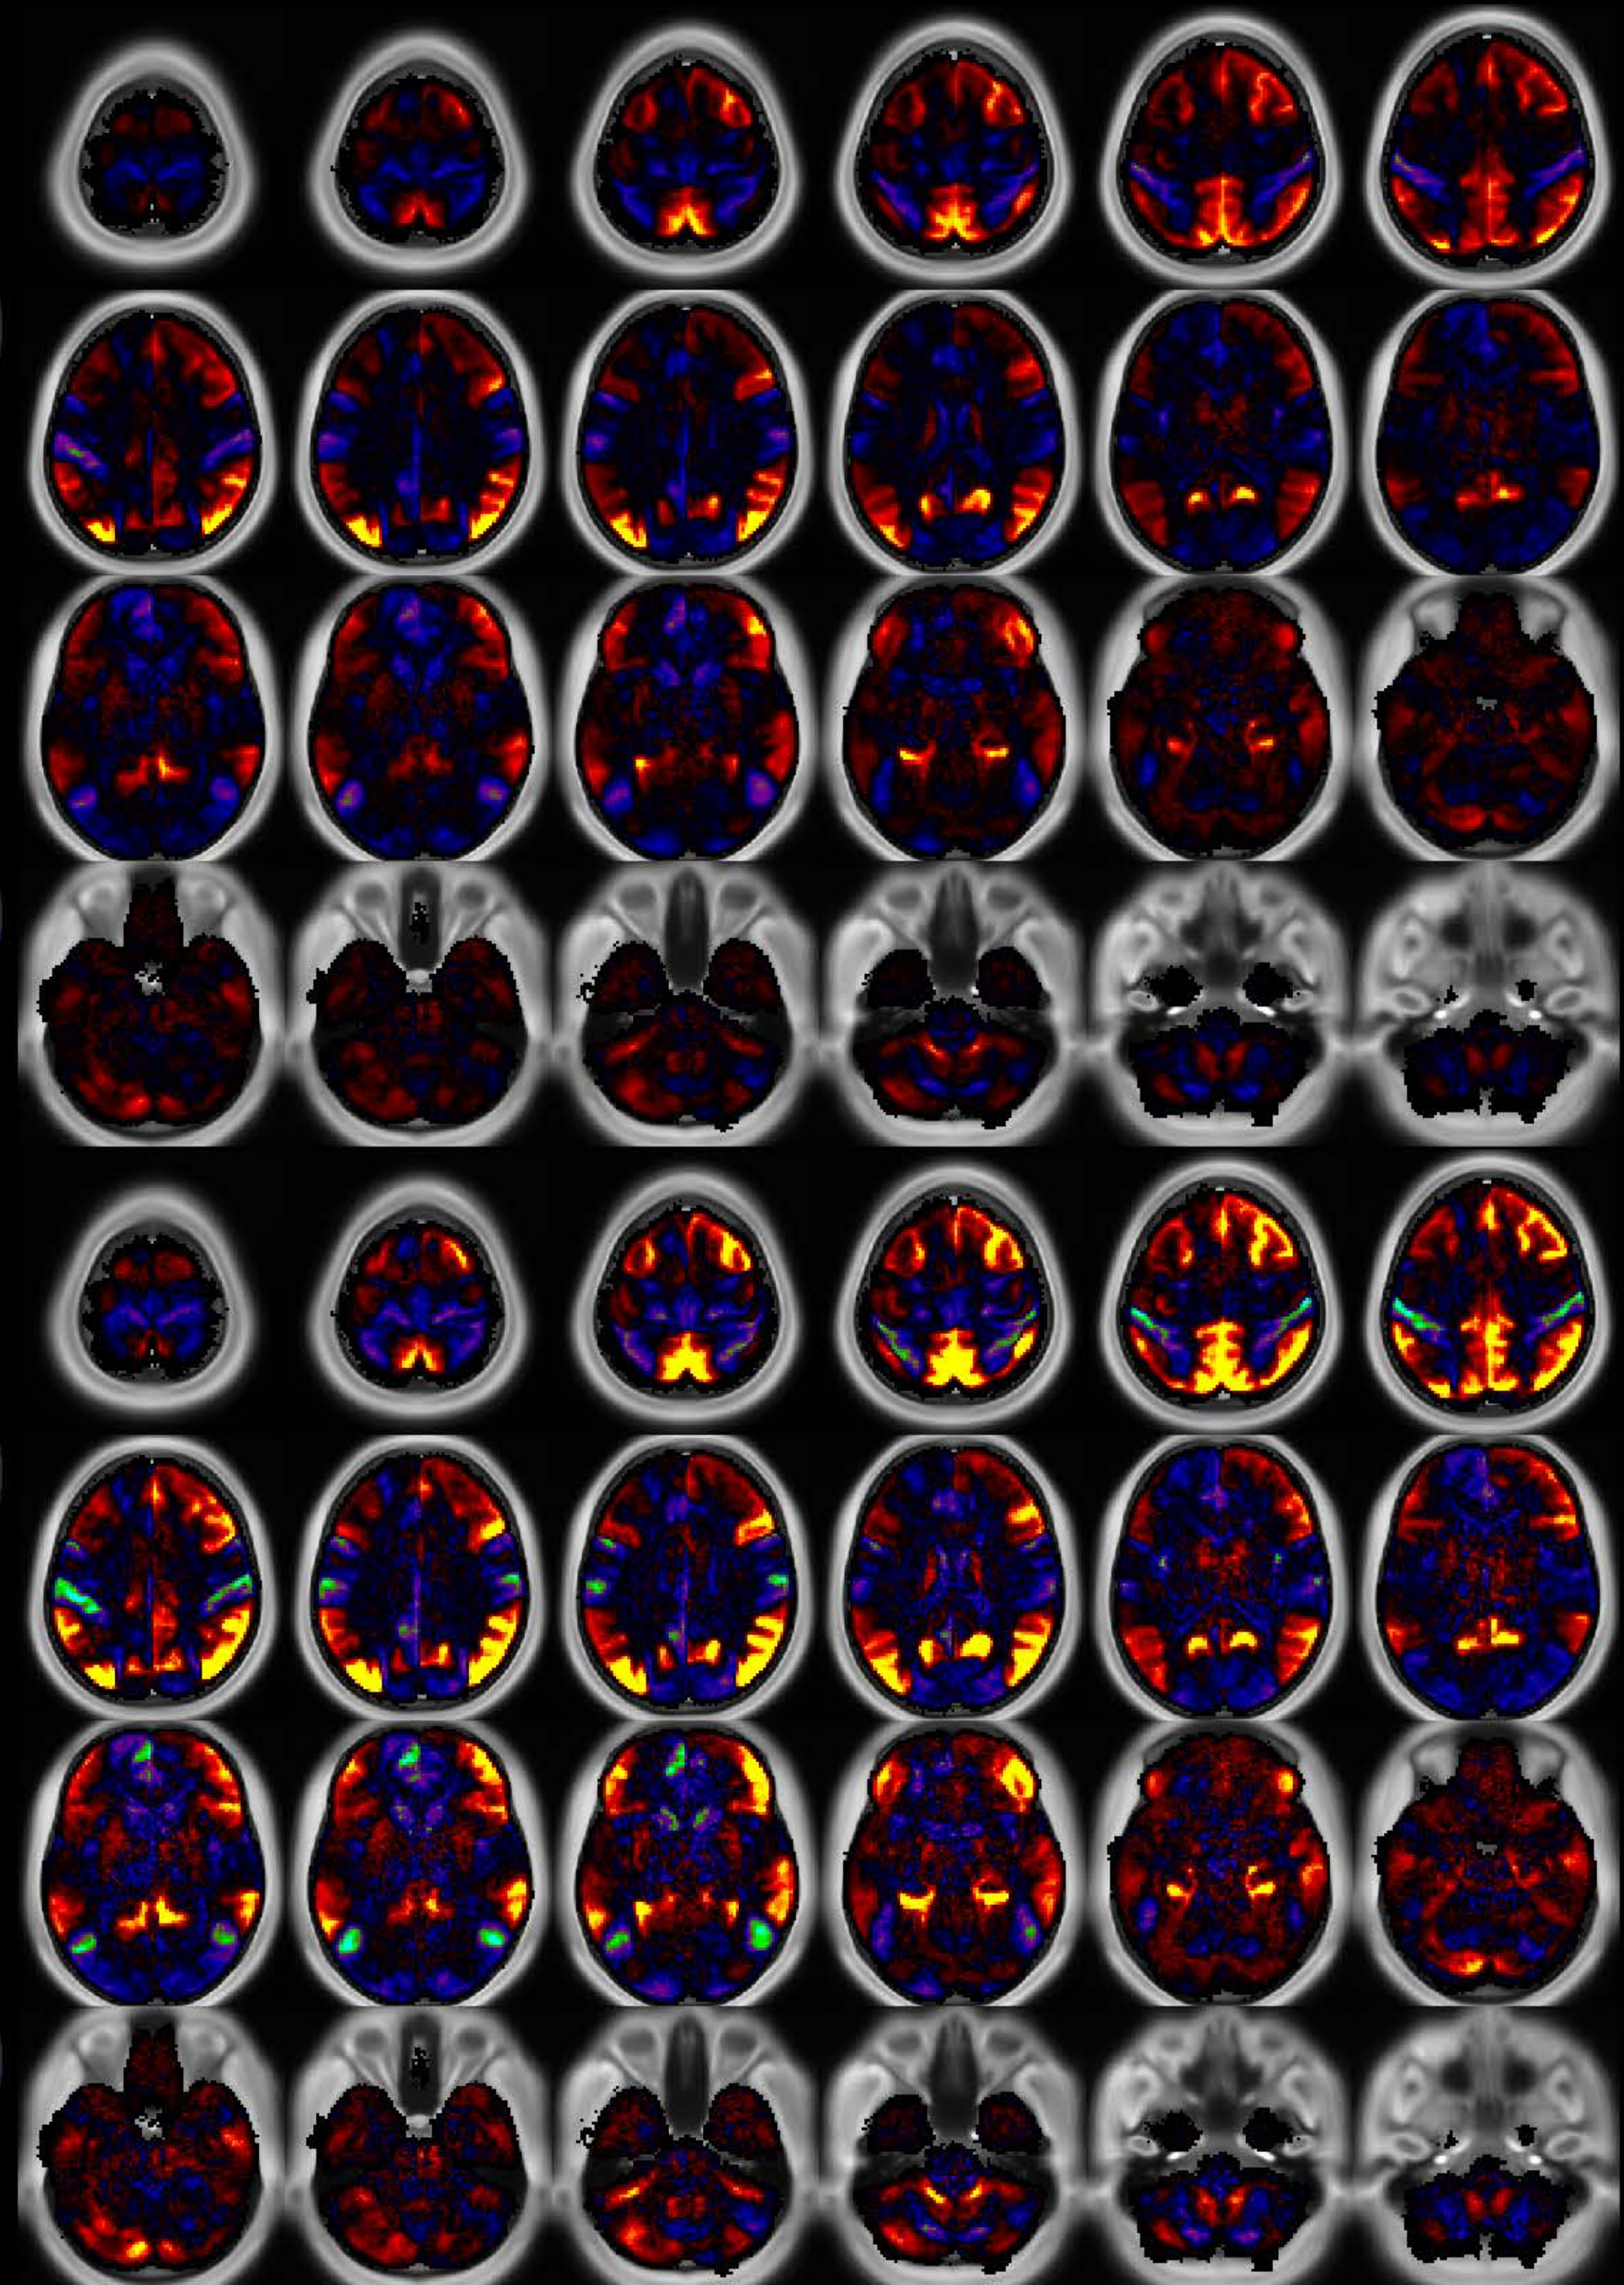

Seconds

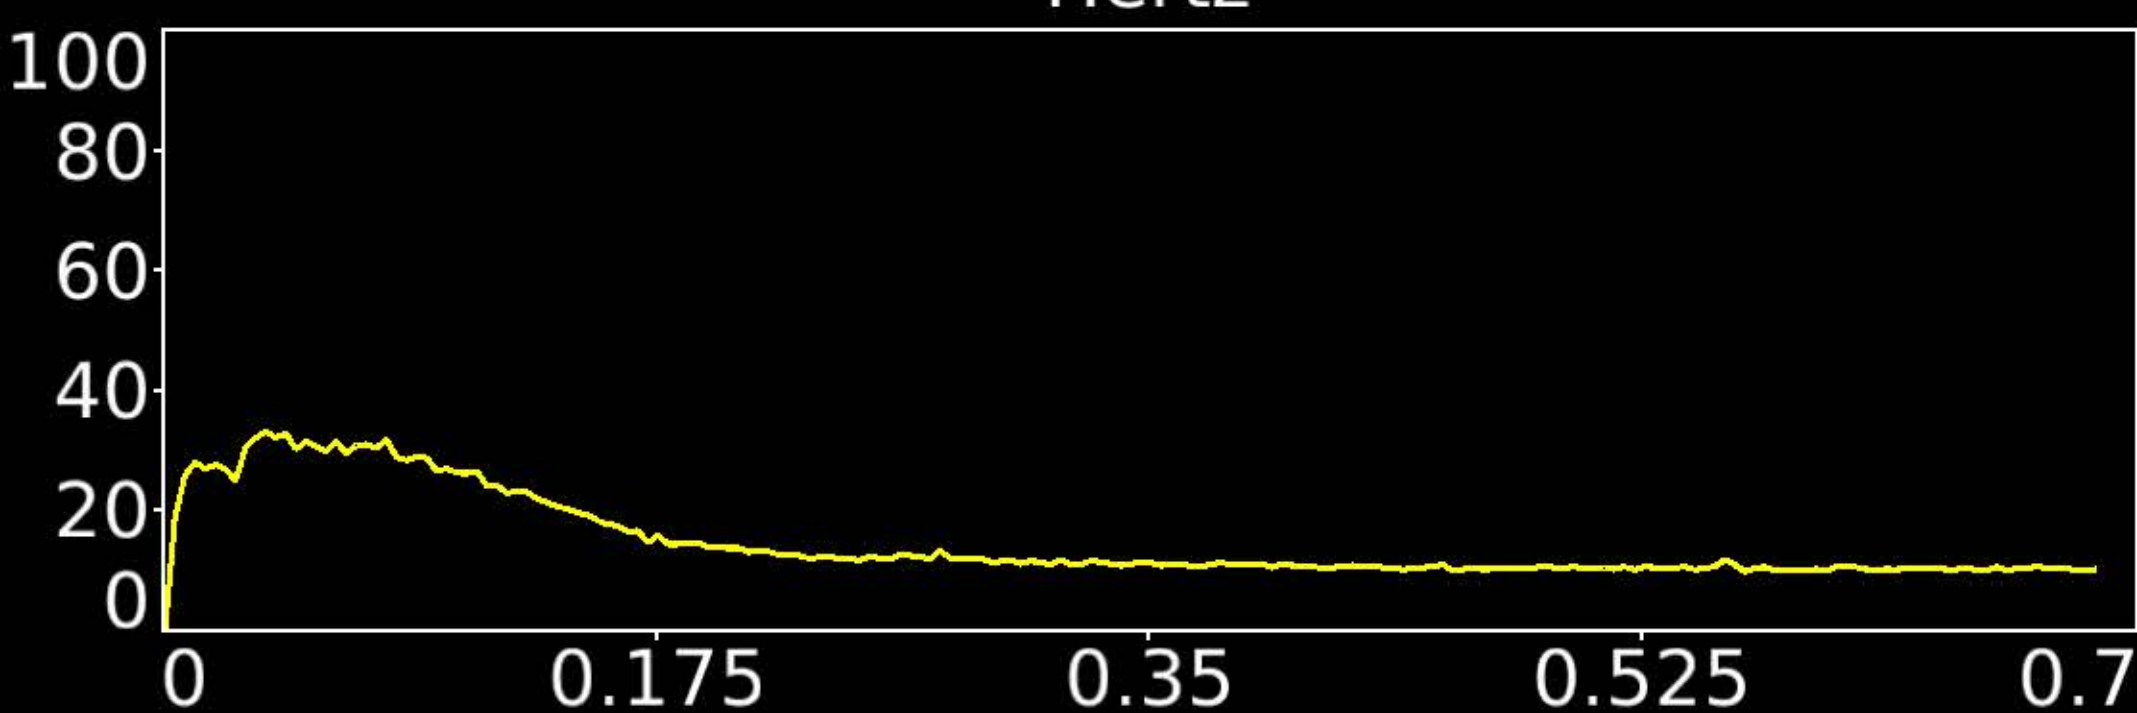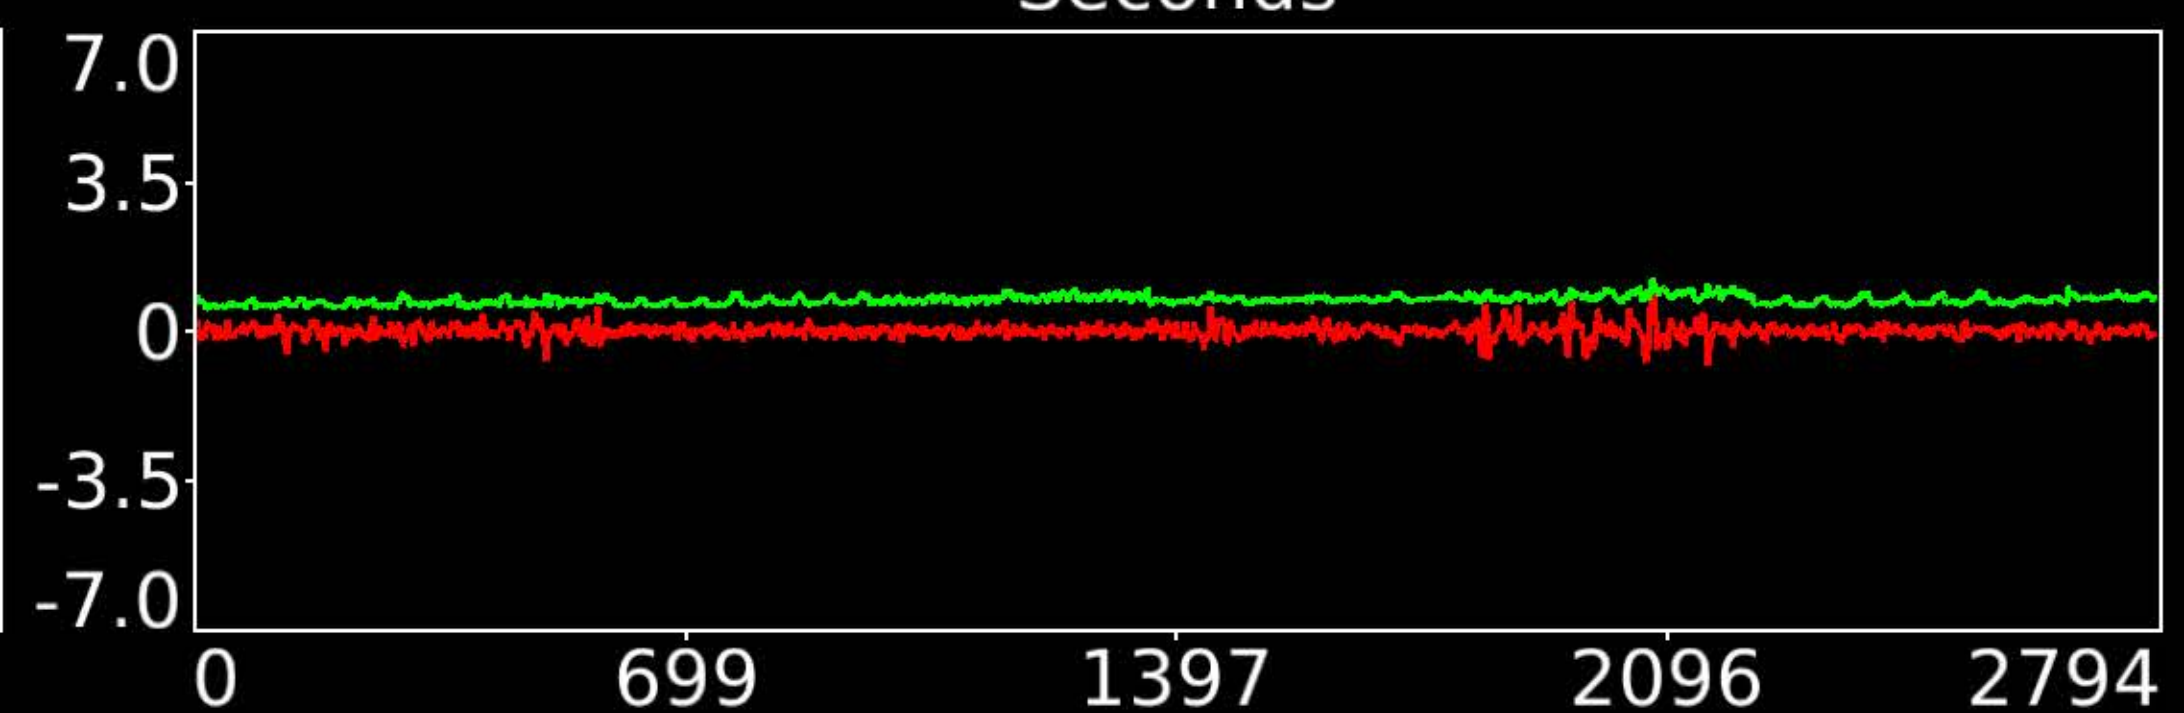

|                           |                            |                                                      |  |
|---------------------------|----------------------------|------------------------------------------------------|--|
| Number & Class: 39 Signal |                            | Name: Parietal Occipital Network (Latest Modularity) |  |
| RVT Correlated: No        | DVARS Dip Associated: No   | Cross-Subject Variable: No                           |  |
| Single Subject: No        | % Variance Explained: 1.03 | Globality Index: 0.43                                |  |
| Task Component: No        | Rest Component: 32         | Task Modulated: No                                   |  |

Rationale: Spatial map includes positive and negative patches that respect known RSNs (e.g. Fronto-Parietal Network)



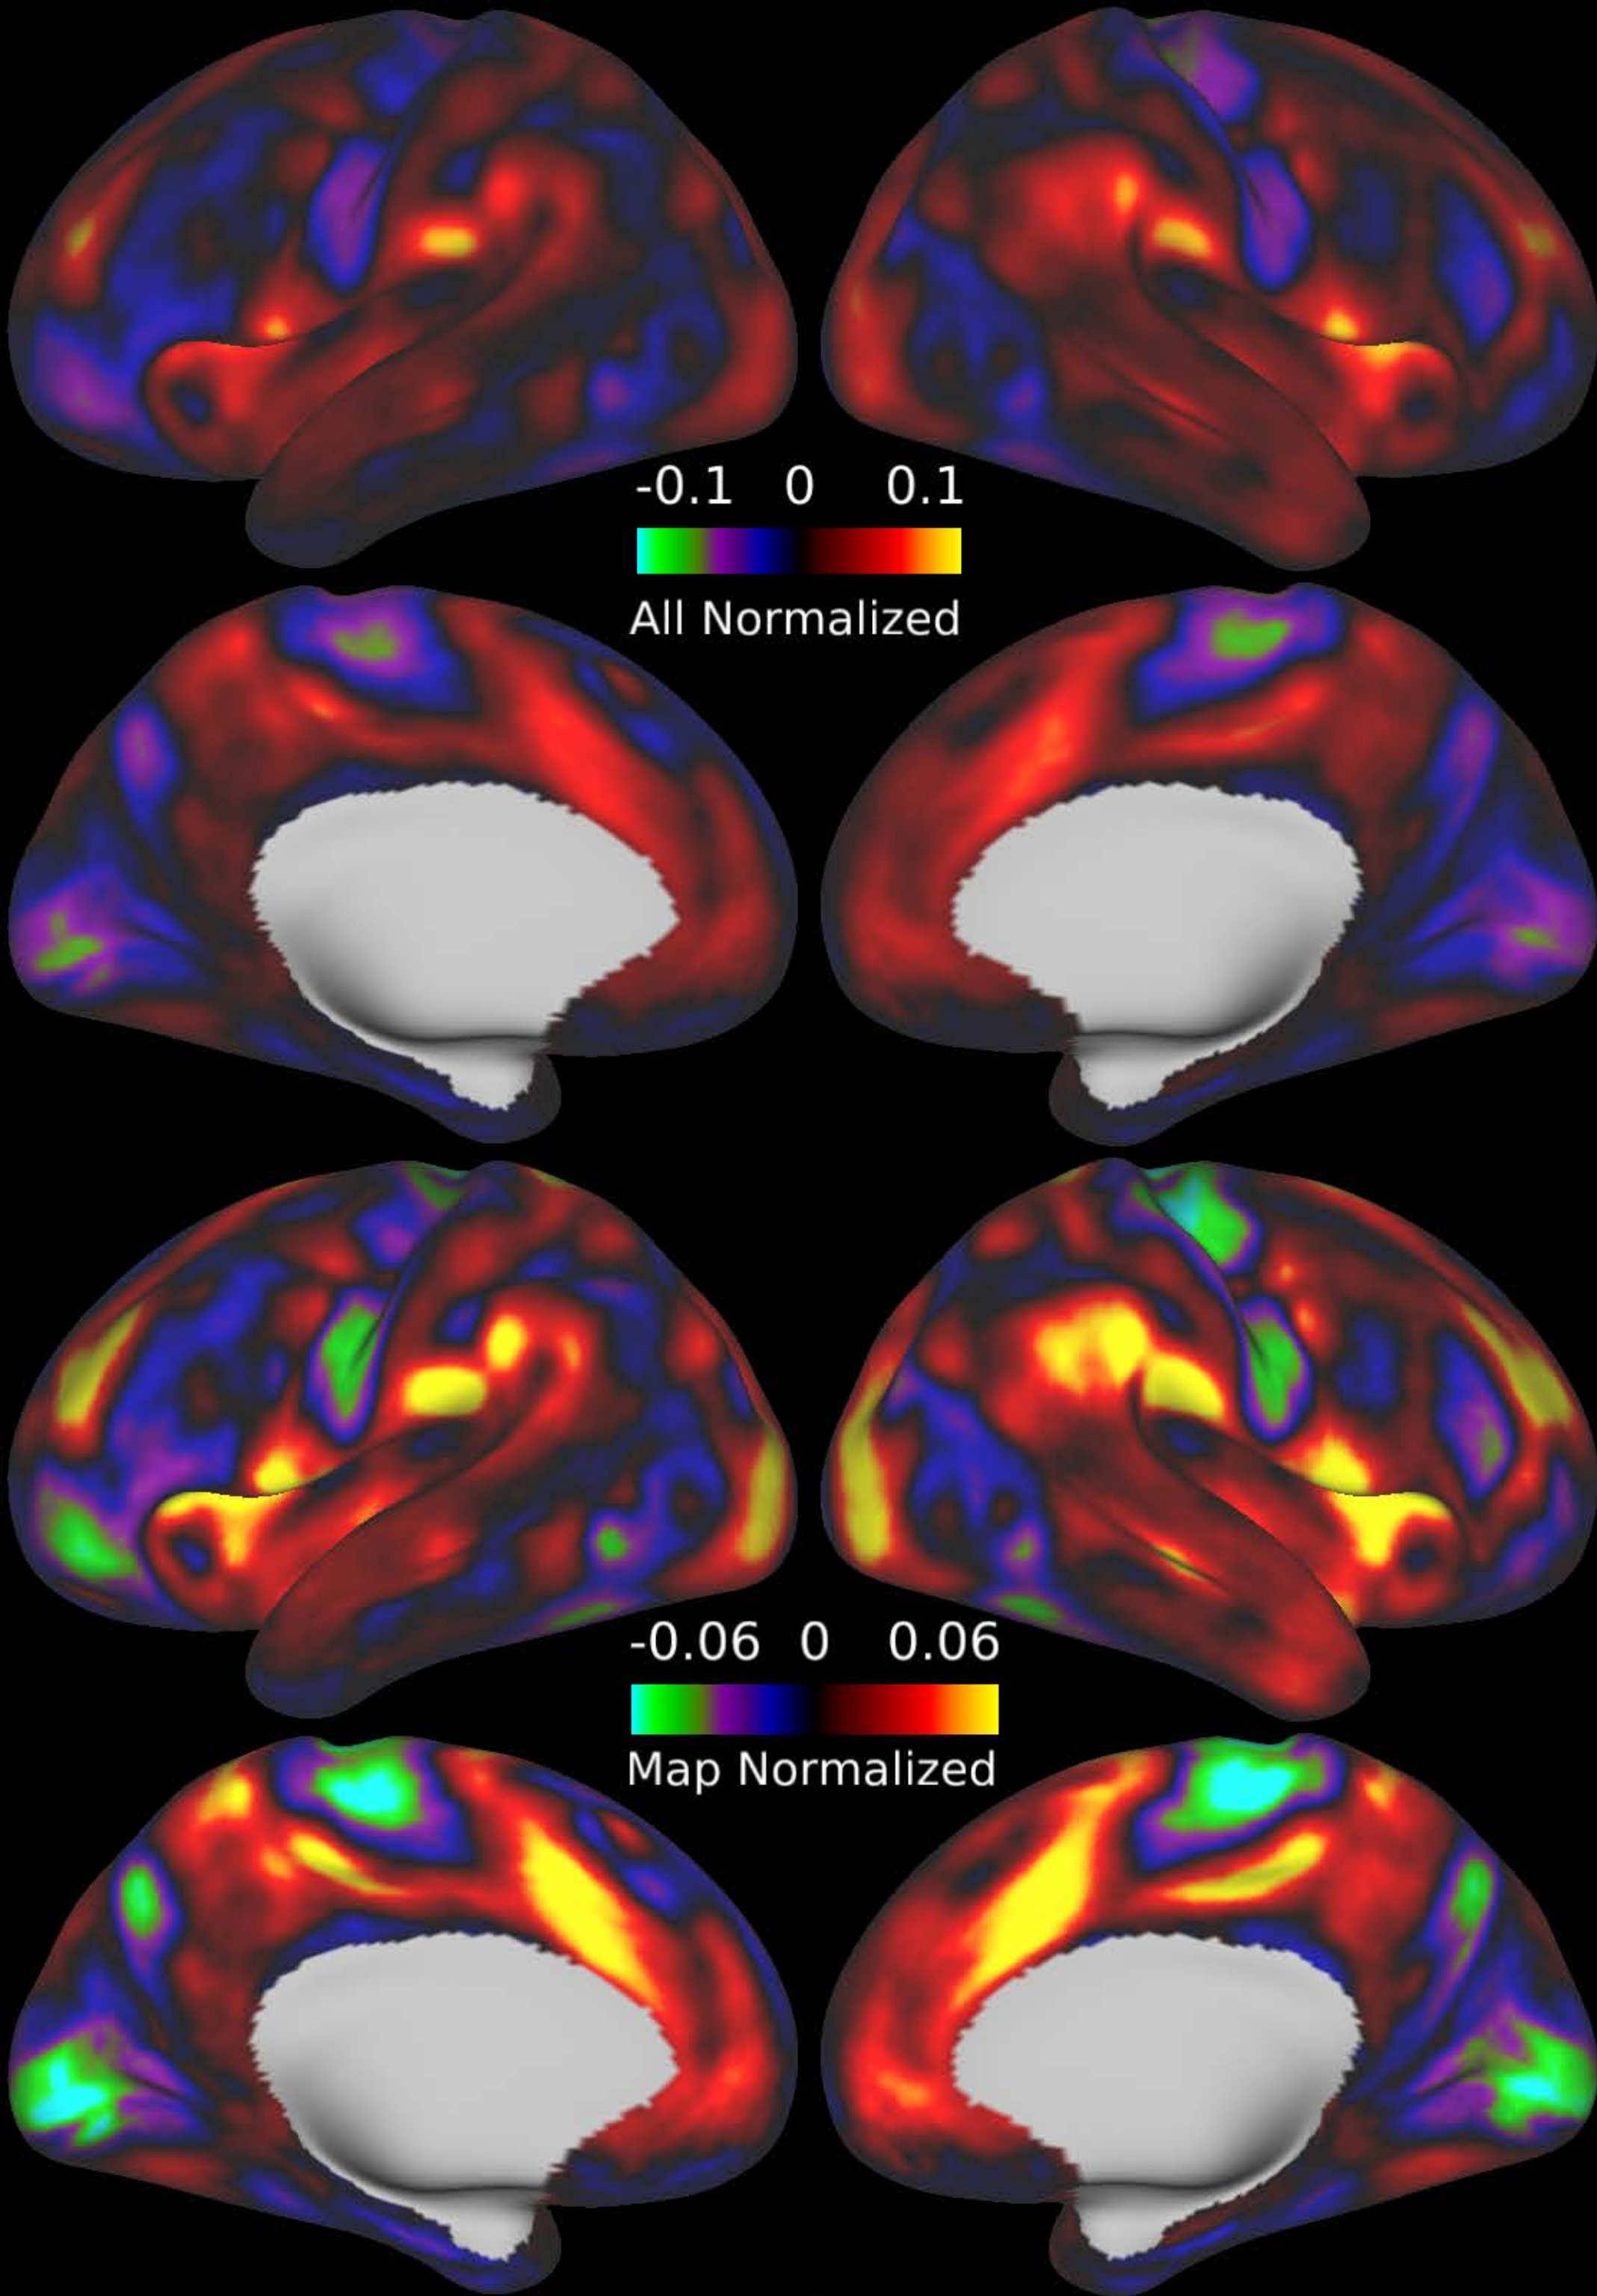

Hertz

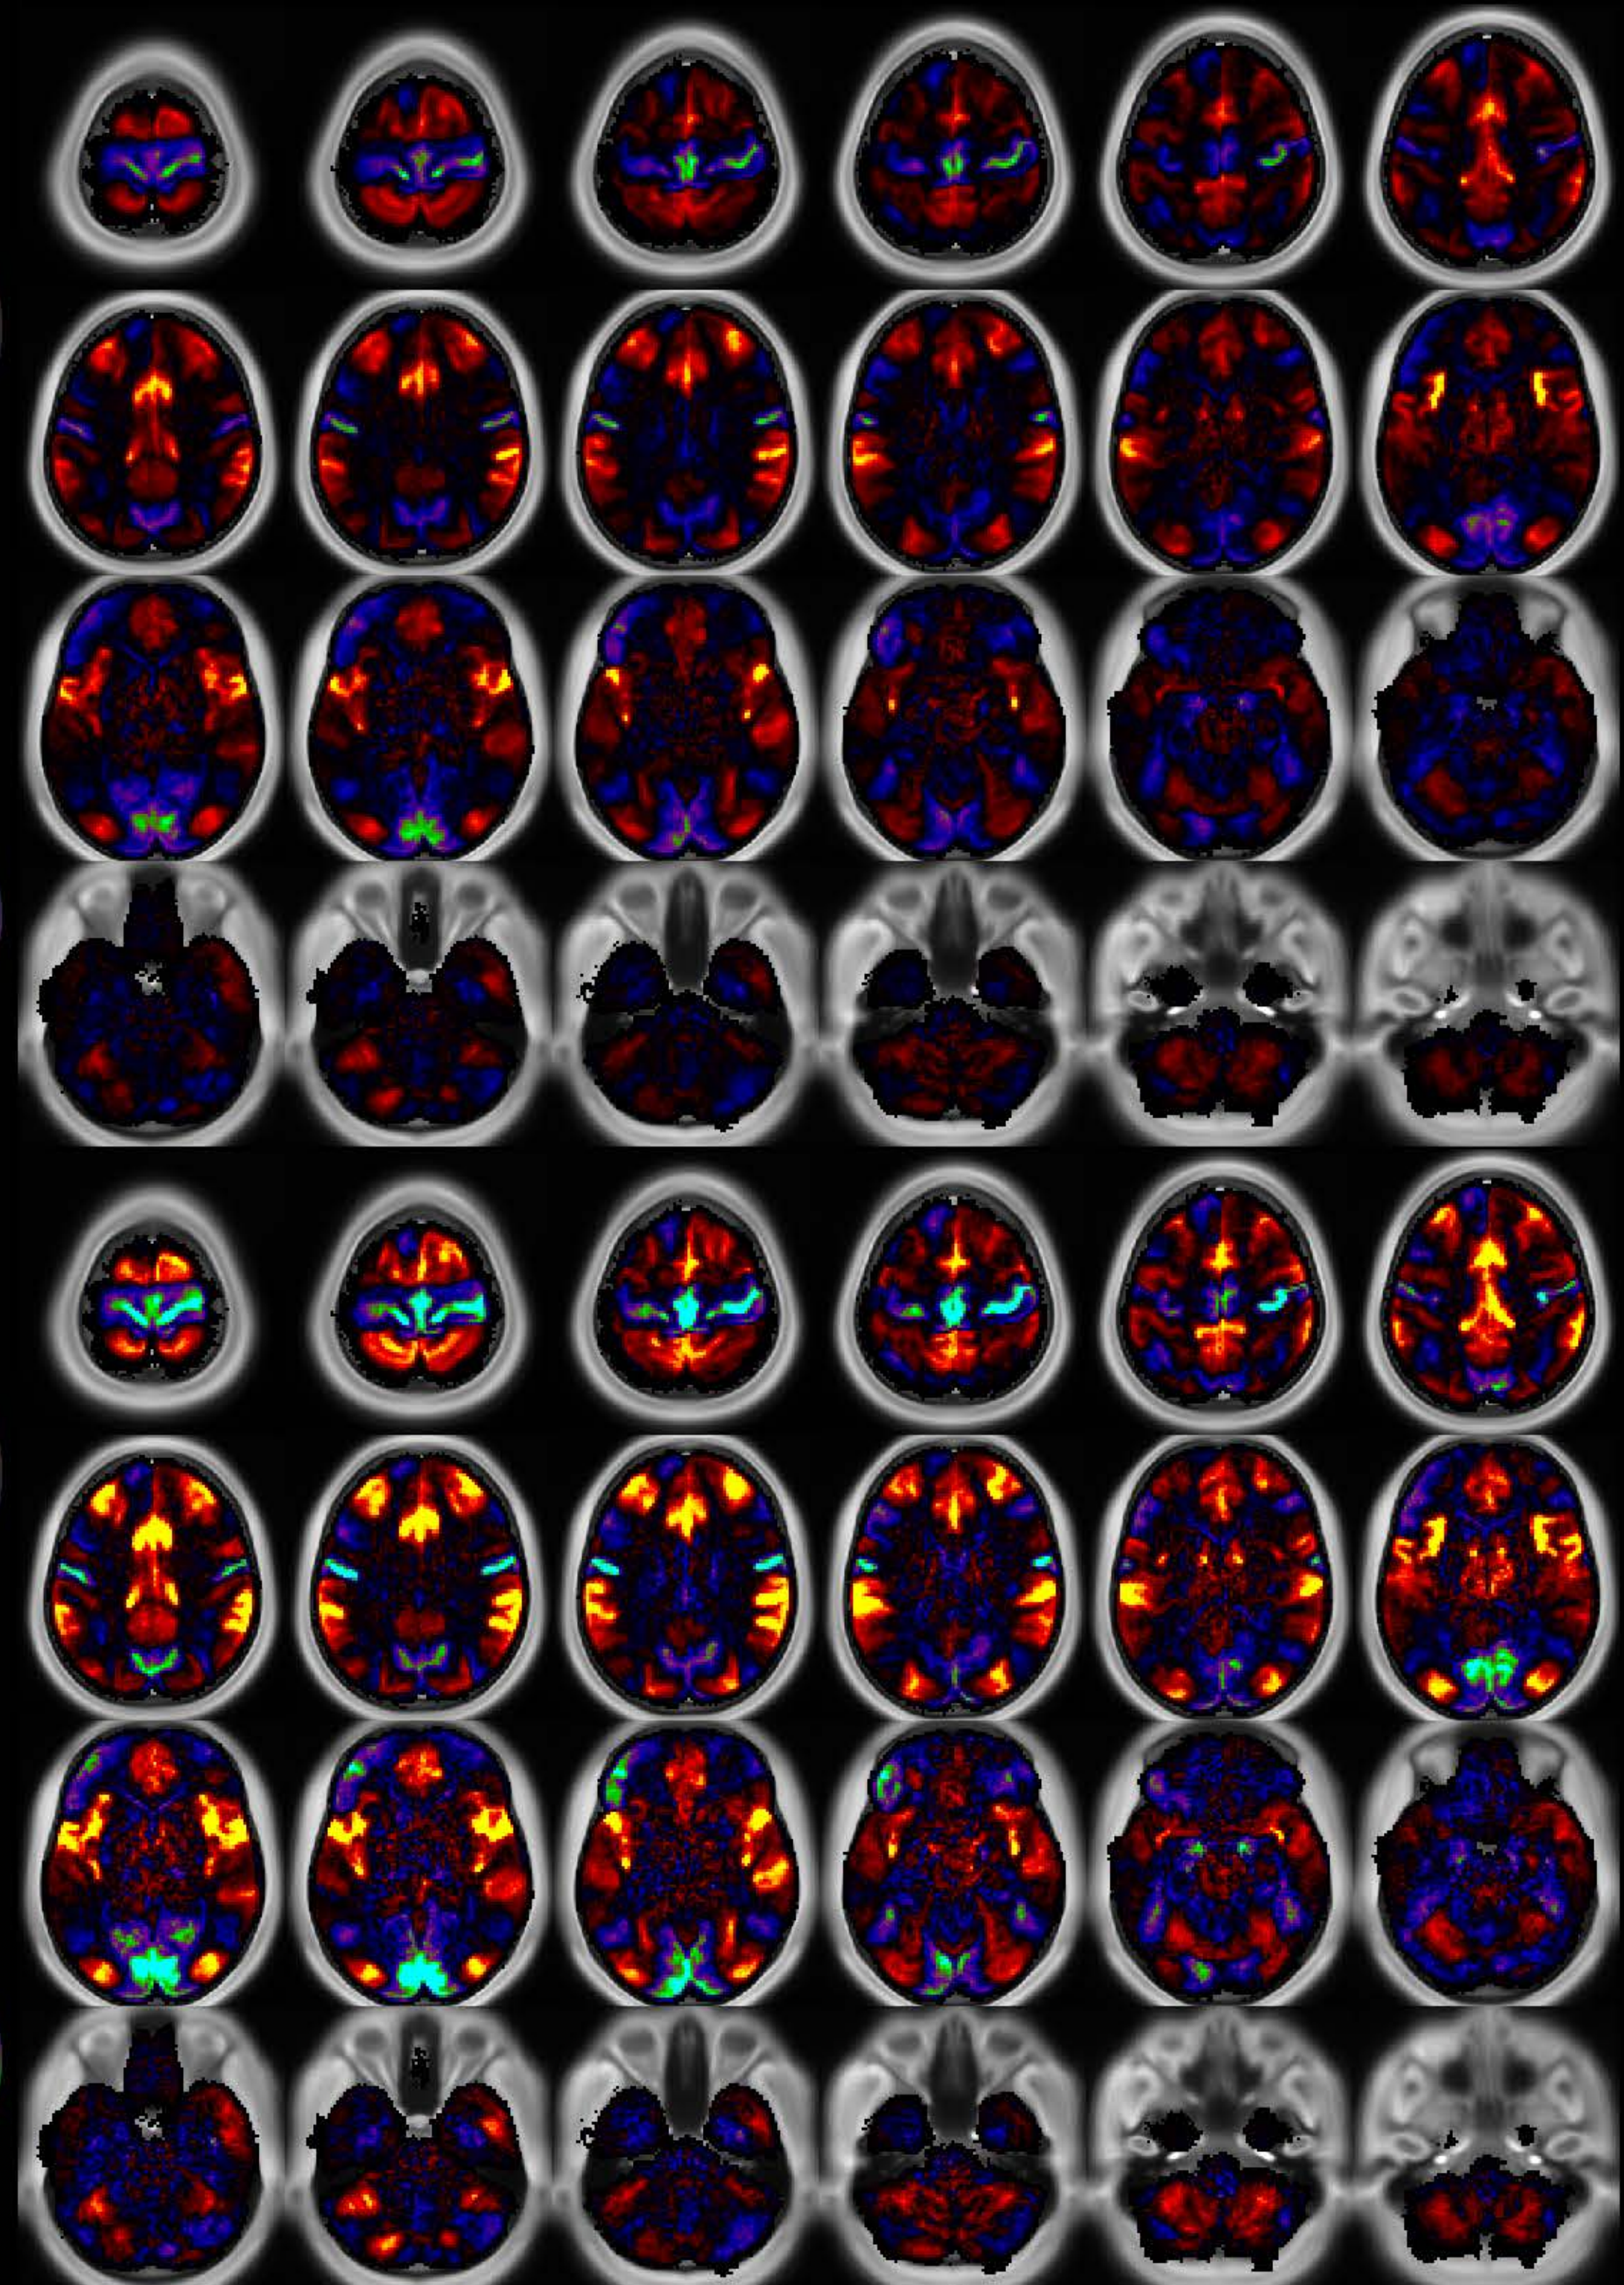

Seconds

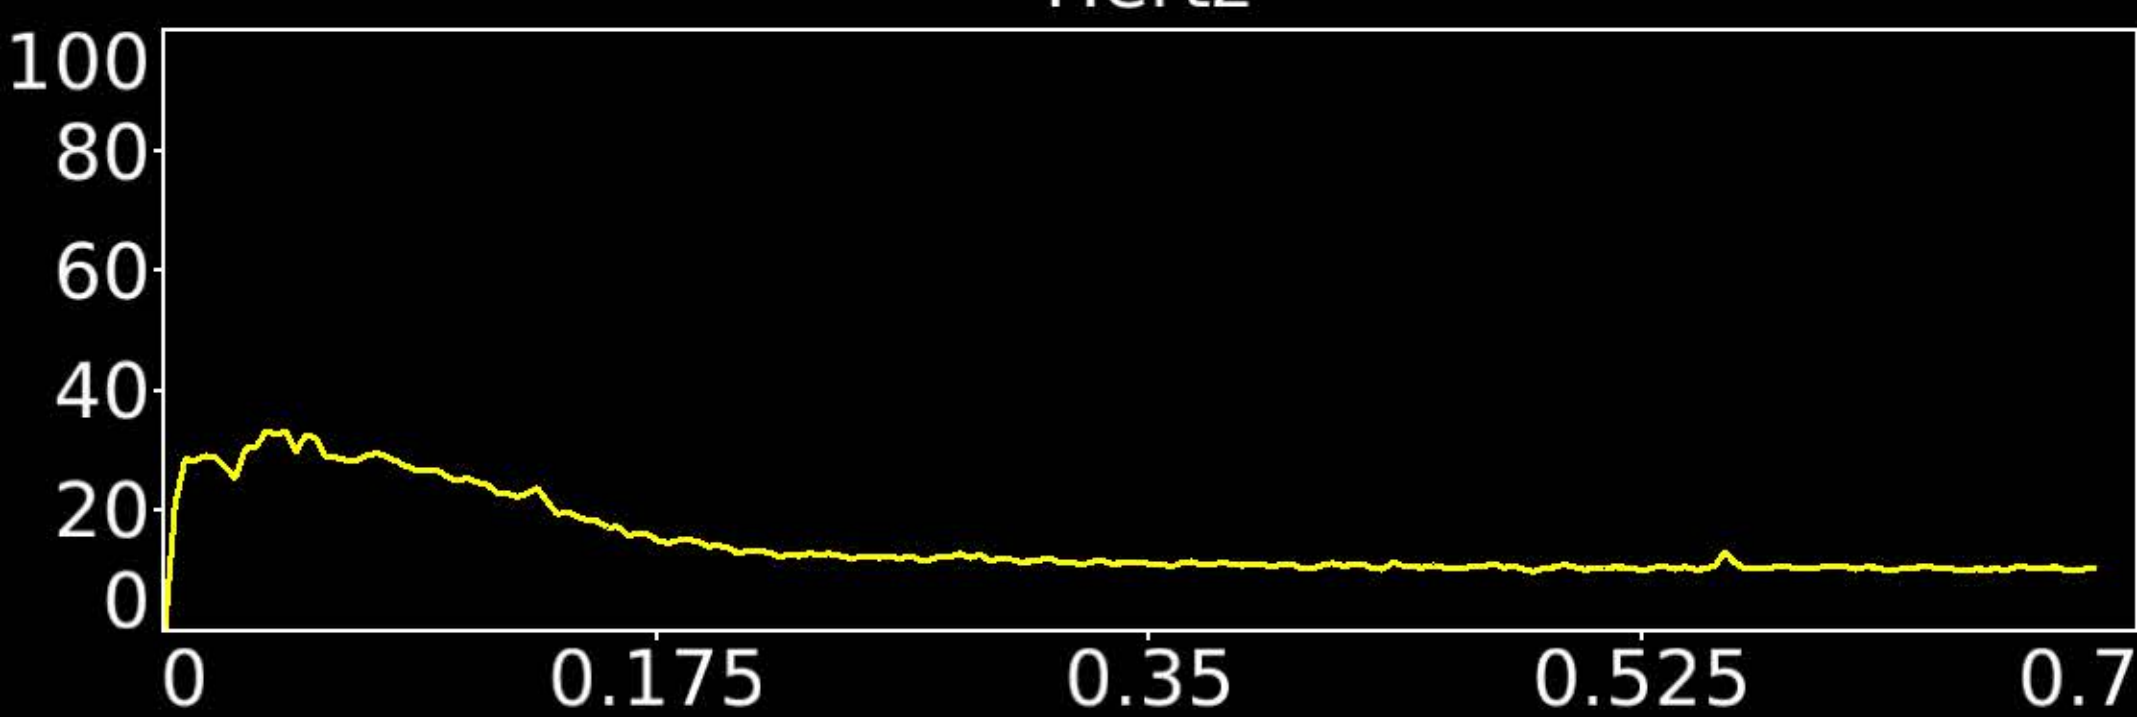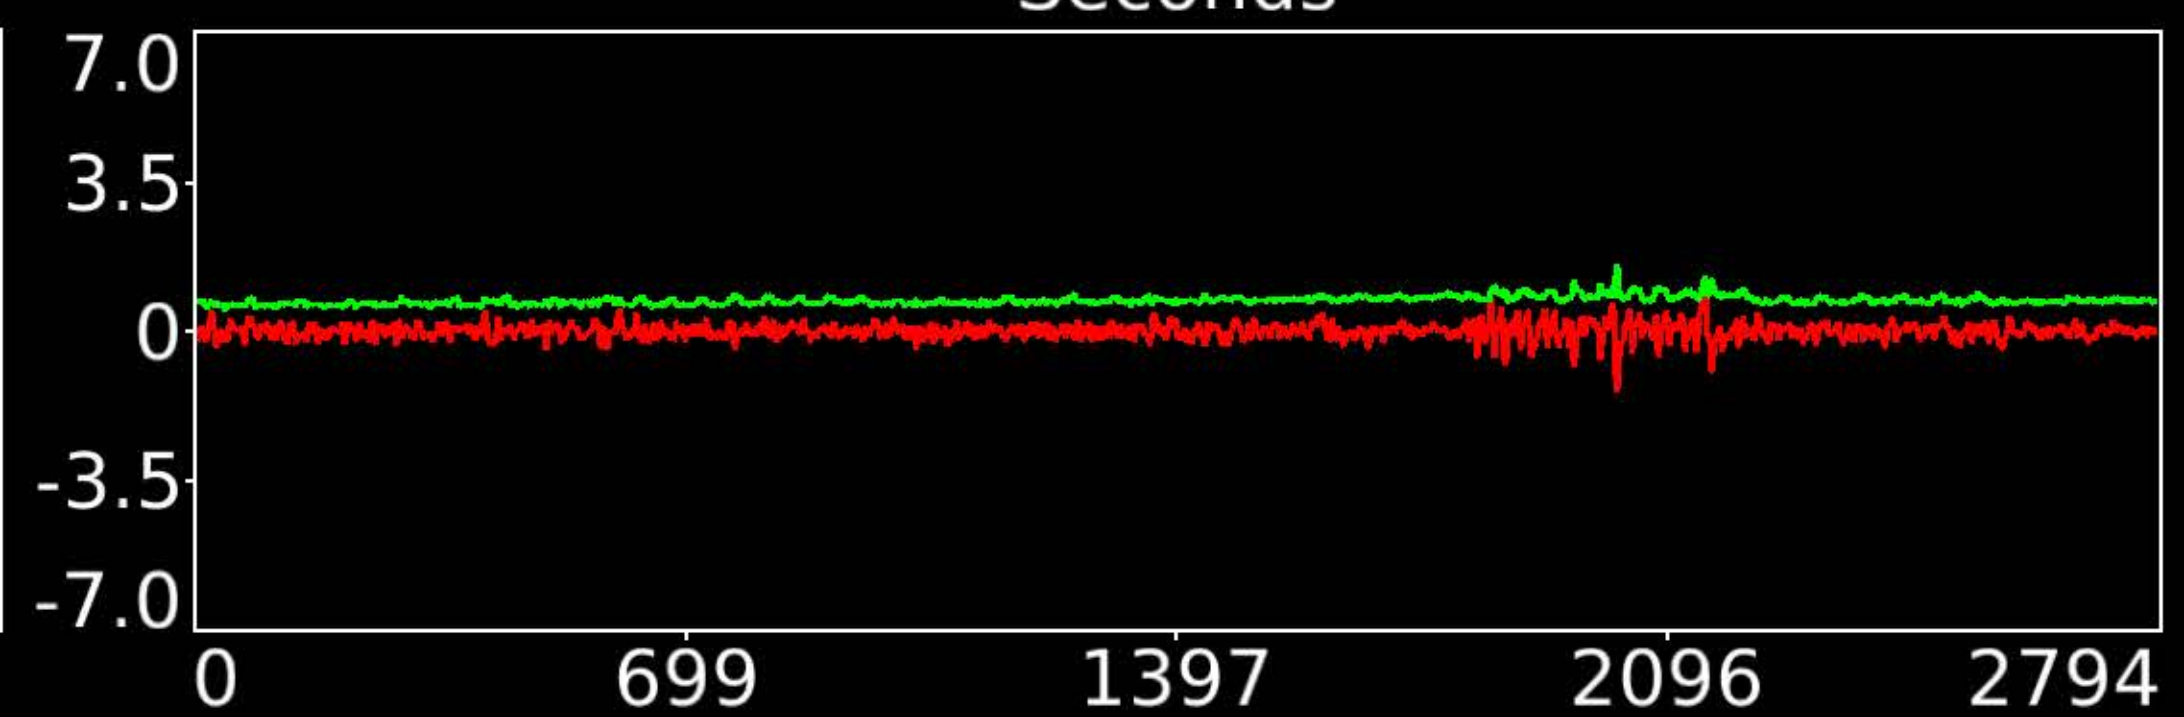

|                           |                            |                               |  |
|---------------------------|----------------------------|-------------------------------|--|
| Number & Class: 40 Signal |                            | Name: Cingular-Opercular-Like |  |
| RVT Correlated: No        | DVARS Dip Associated: No   | Cross-Subject Variable: No    |  |
| Single Subject: No        | % Variance Explained: 0.99 | Globality Index: 0.55         |  |
| Task Component: No        | Rest Component: No         | Task Modulated: No            |  |

Rationale: Spatial map includes positive and negative patches that respect known RSNs (e.g. Cingulo-Opercular Network)



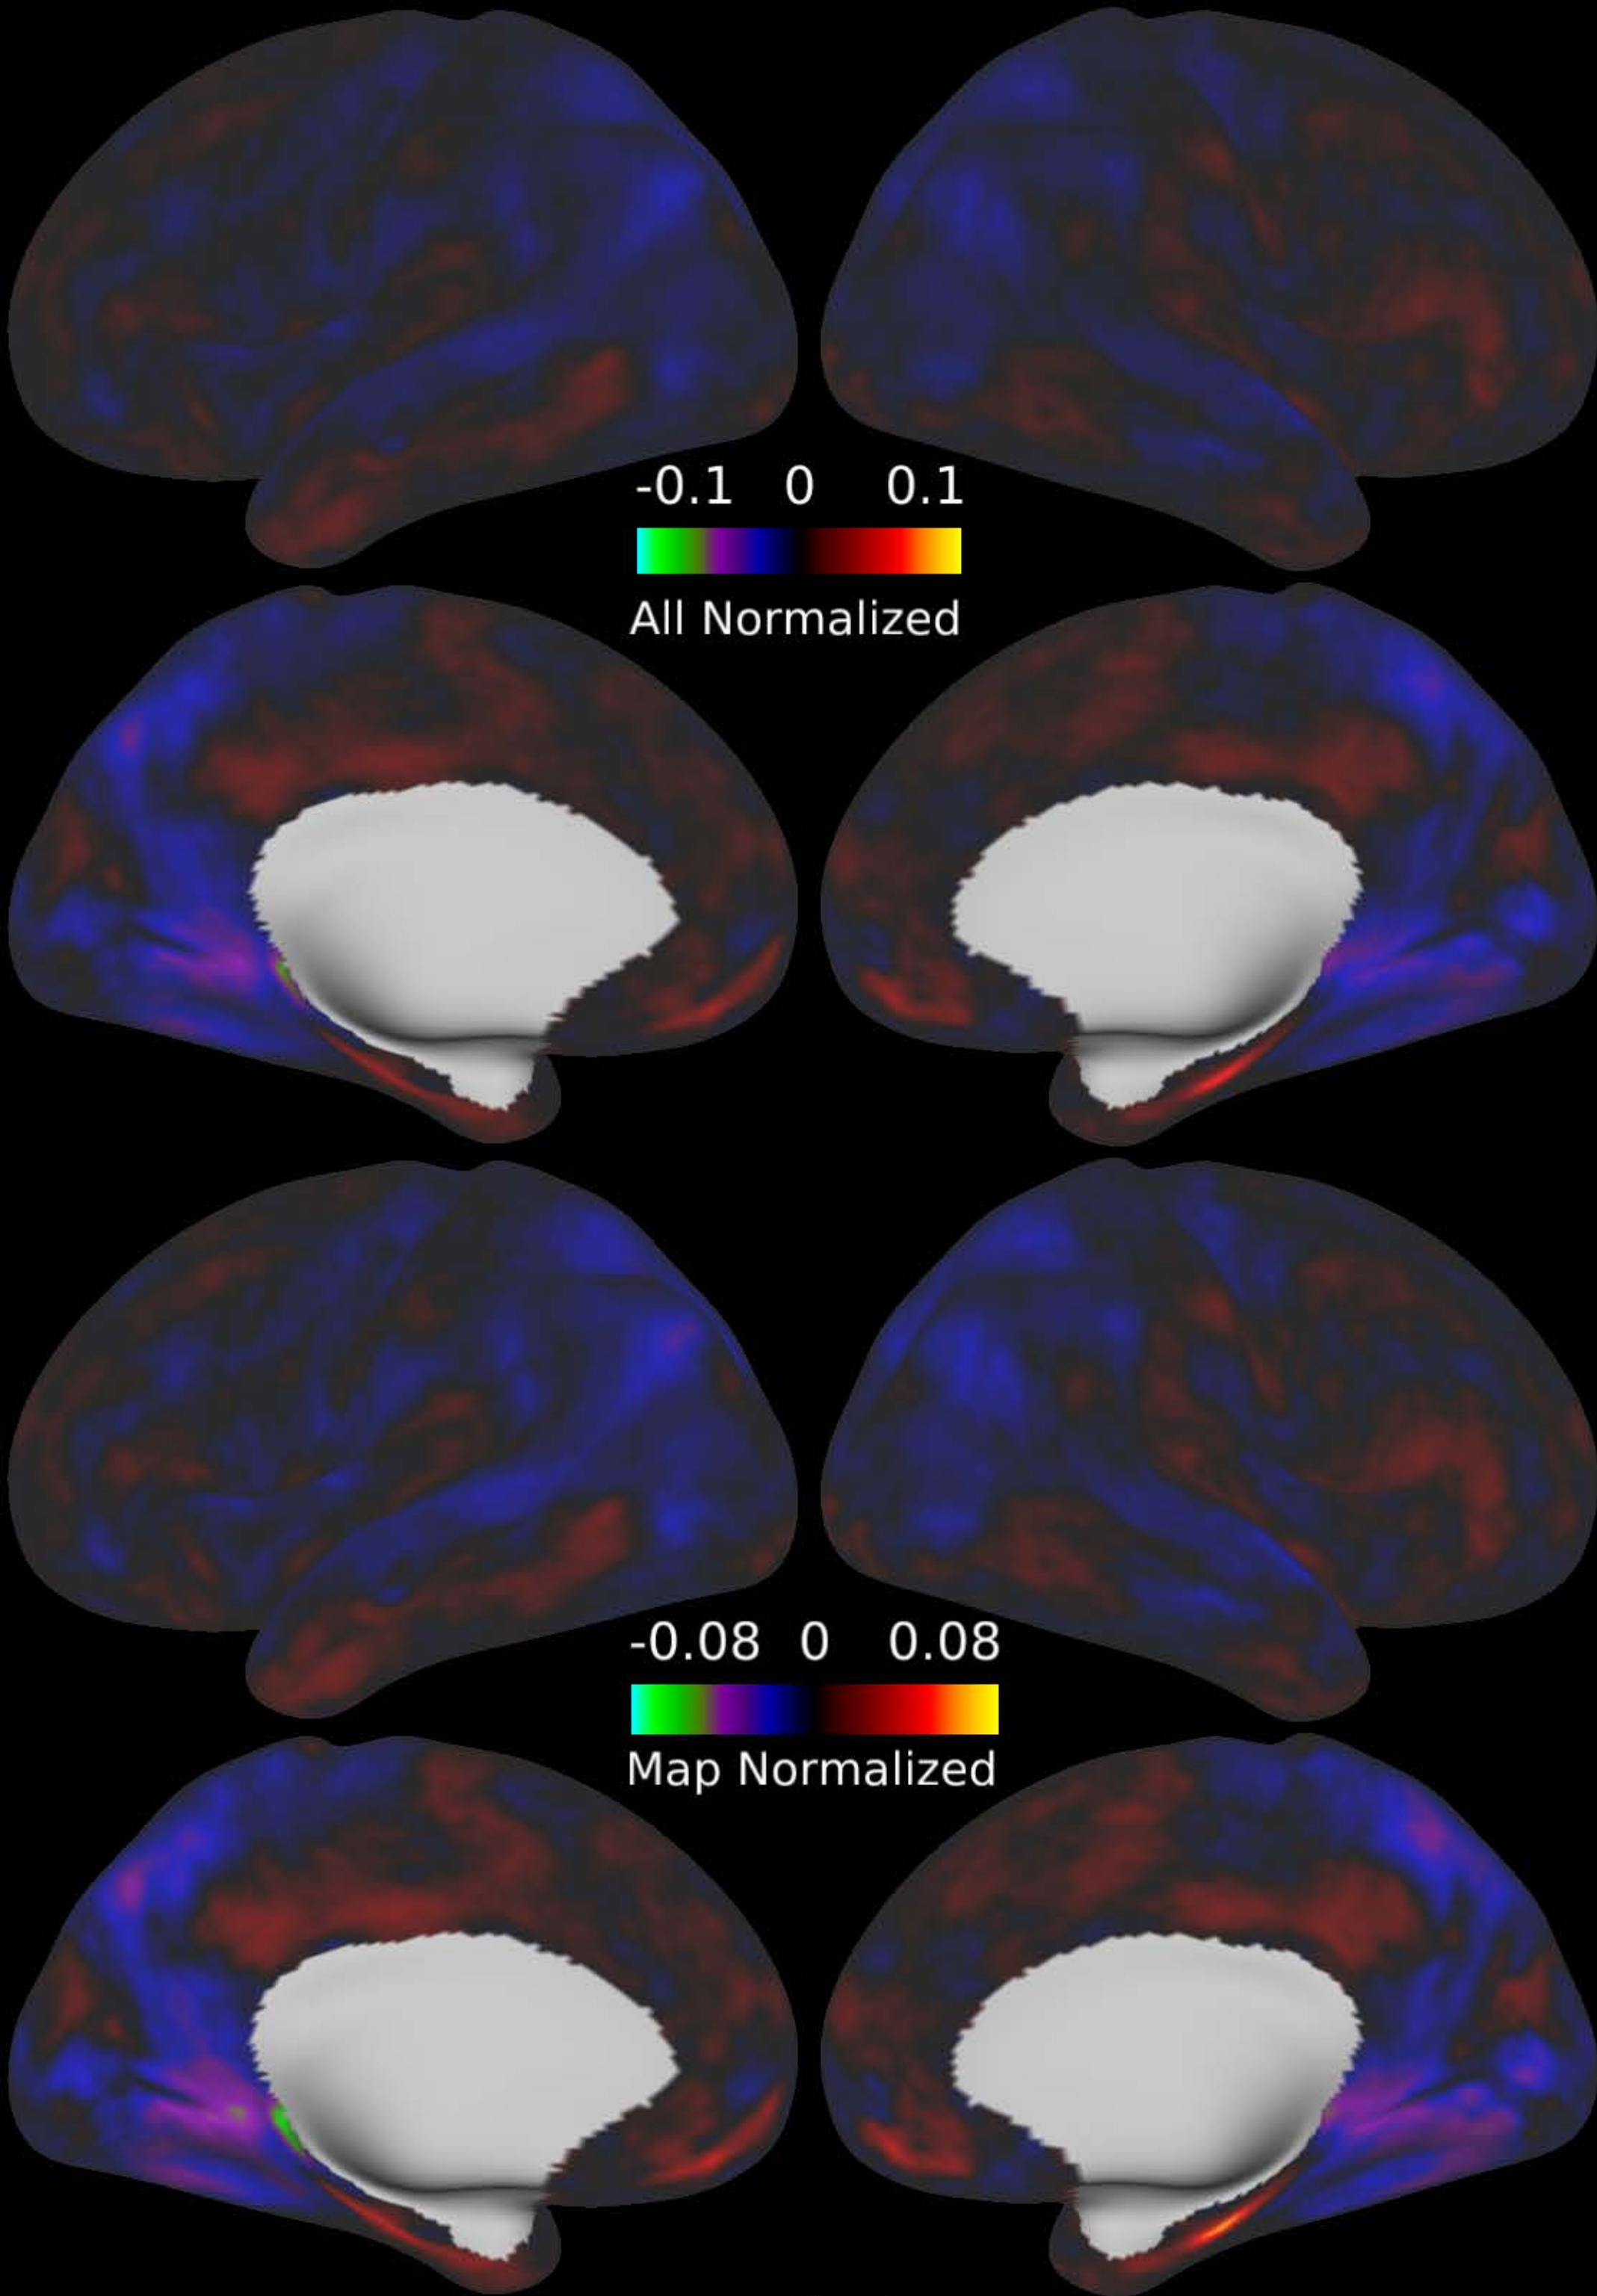

Hertz

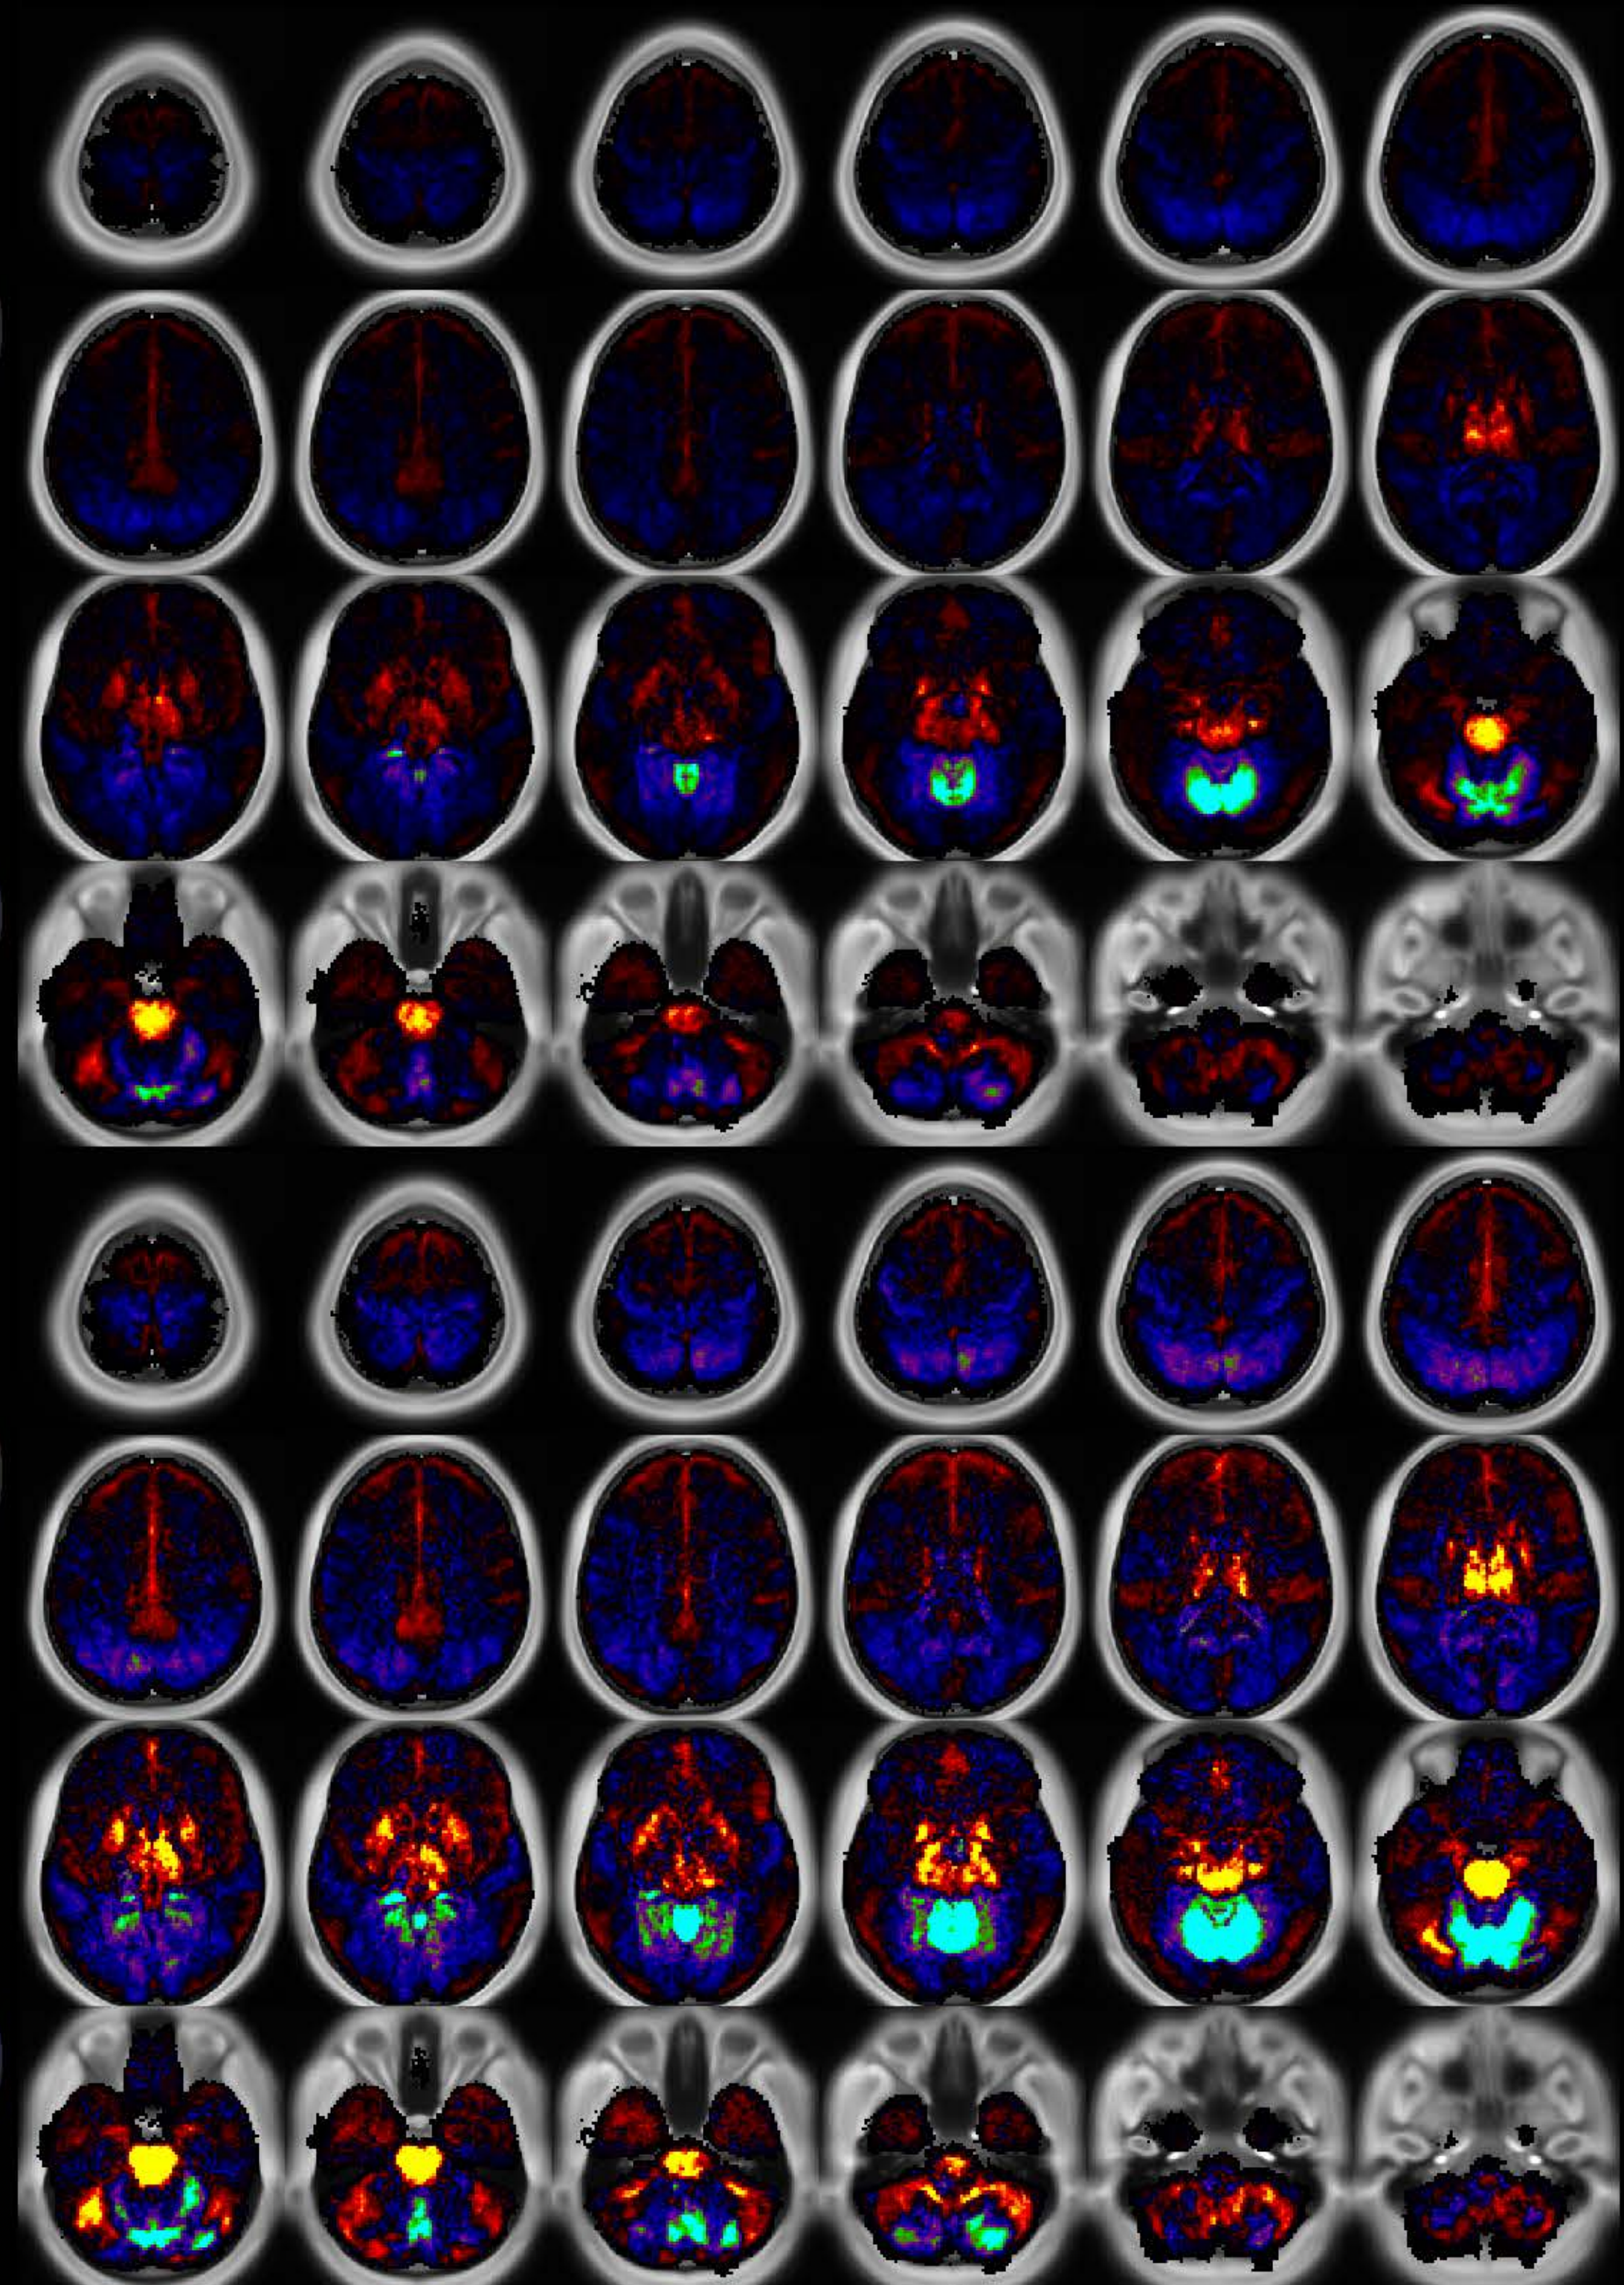

Seconds

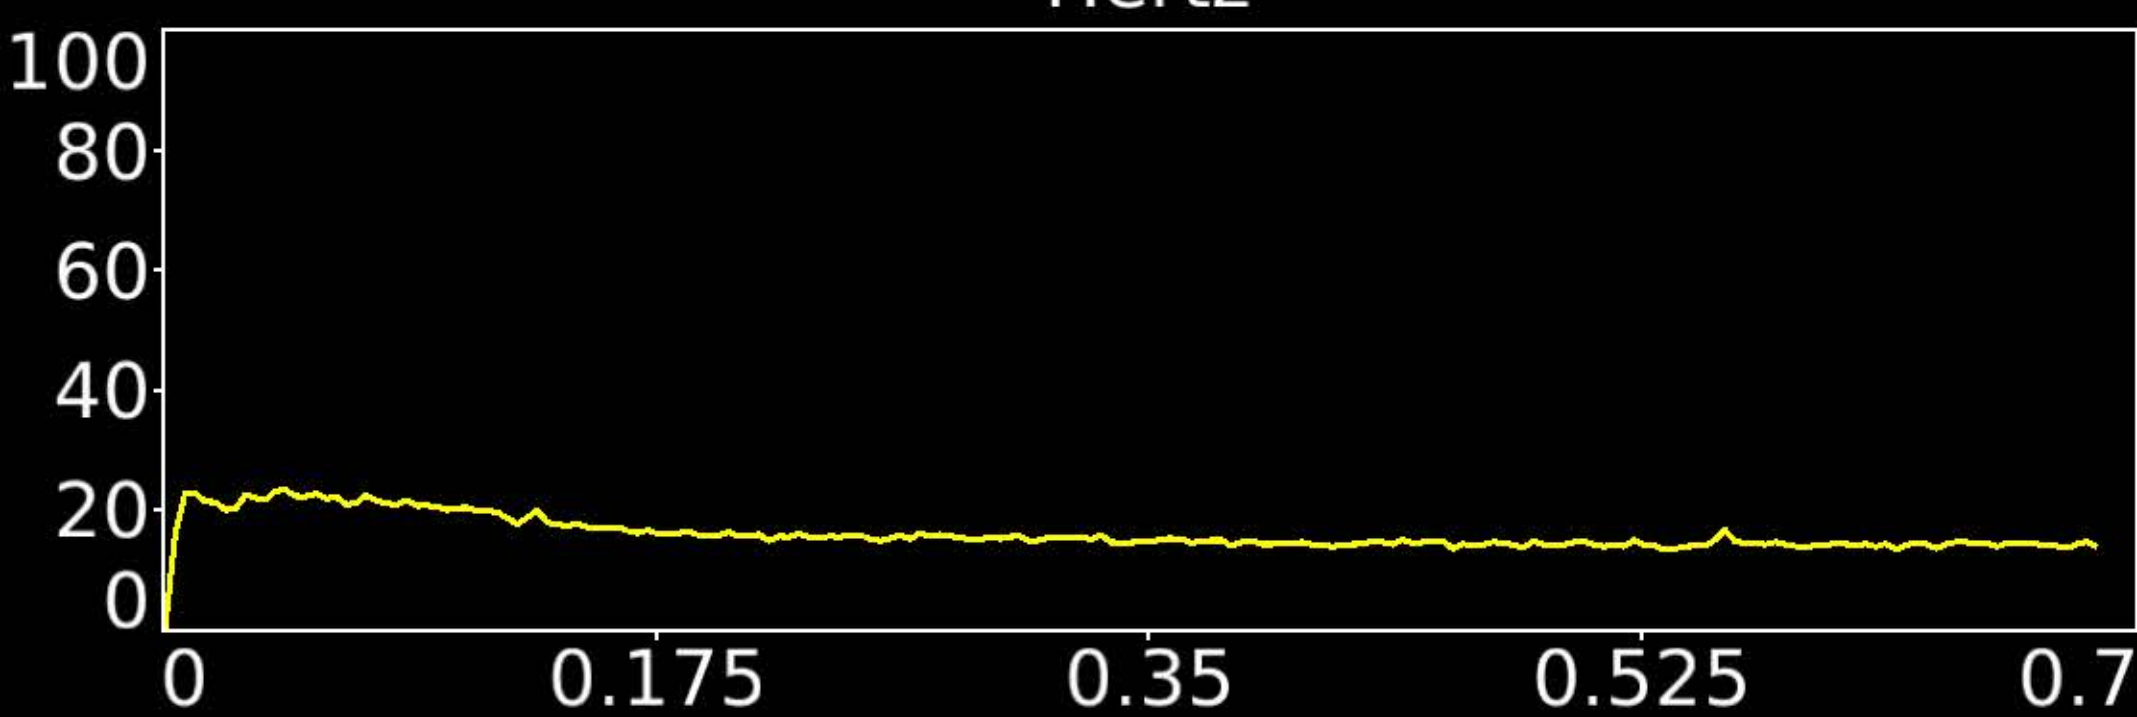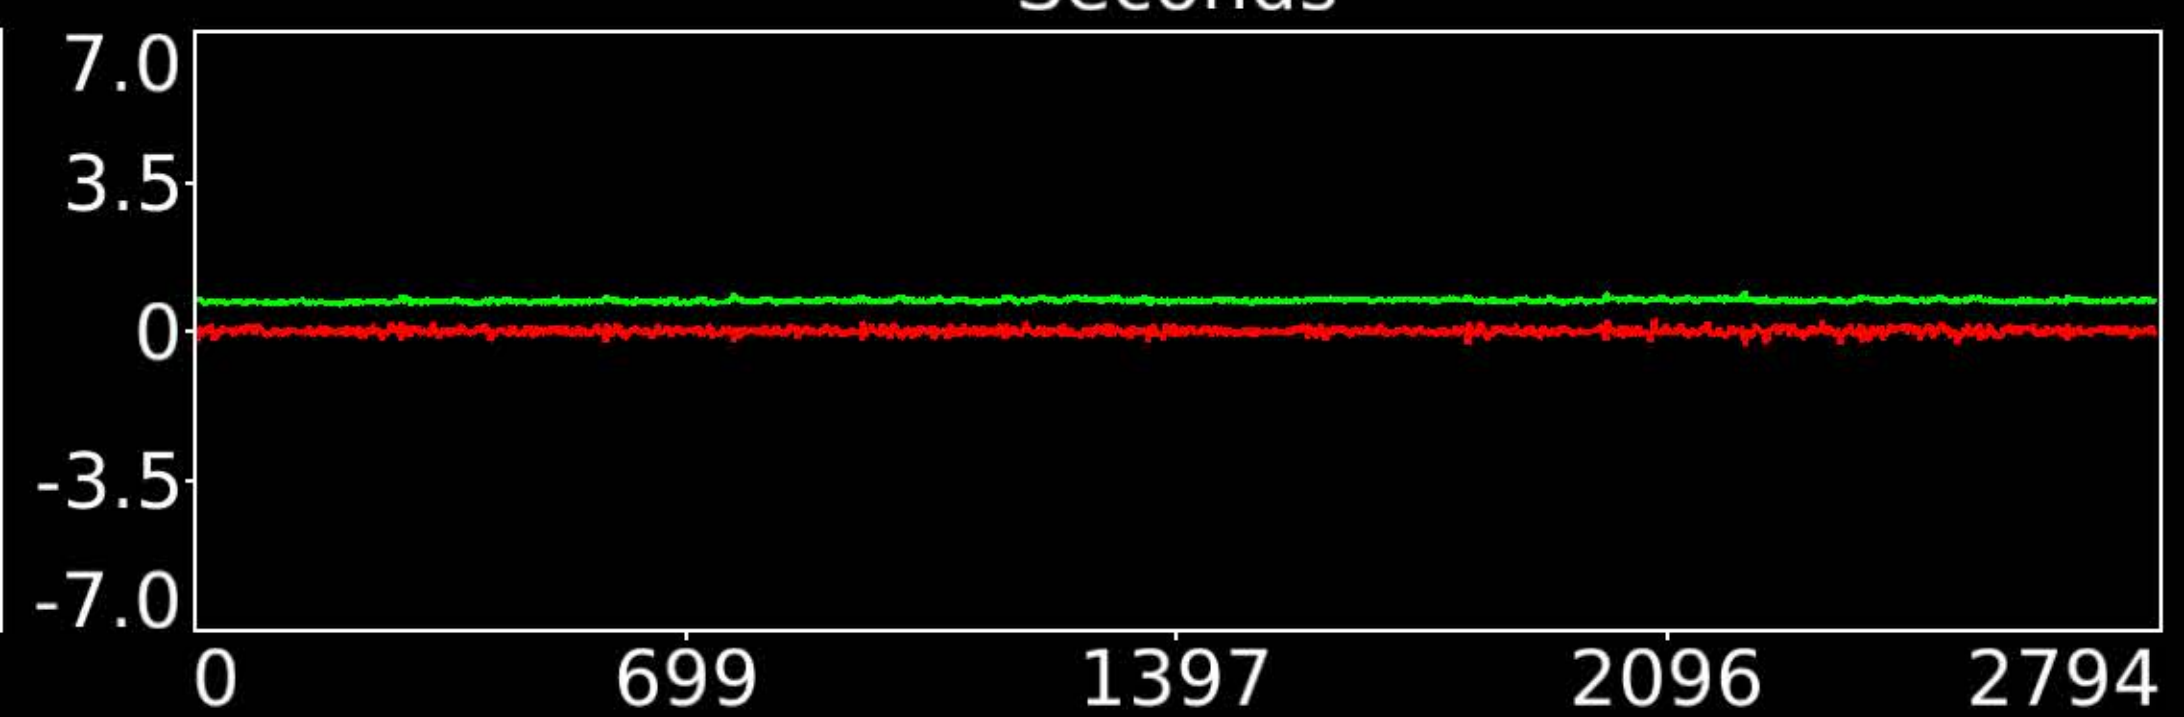

|                                                              |                            |                                             |  |
|--------------------------------------------------------------|----------------------------|---------------------------------------------|--|
| Number & Class: 41 Noise                                     |                            | Name: Pons + Thalamus > Superior Cerebellum |  |
| RVT Correlated: No                                           | DVARS Dip Associated: No   | Cross-Subject Variable: No                  |  |
| Single Subject: No                                           | % Variance Explained: 0.97 | Globality Index: 0.33                       |  |
| Task Component: 45                                           | Rest Component: No         | Task Modulated: No                          |  |
| Rationale: Spatial map not reflective of known areas or RSNs |                            |                                             |  |



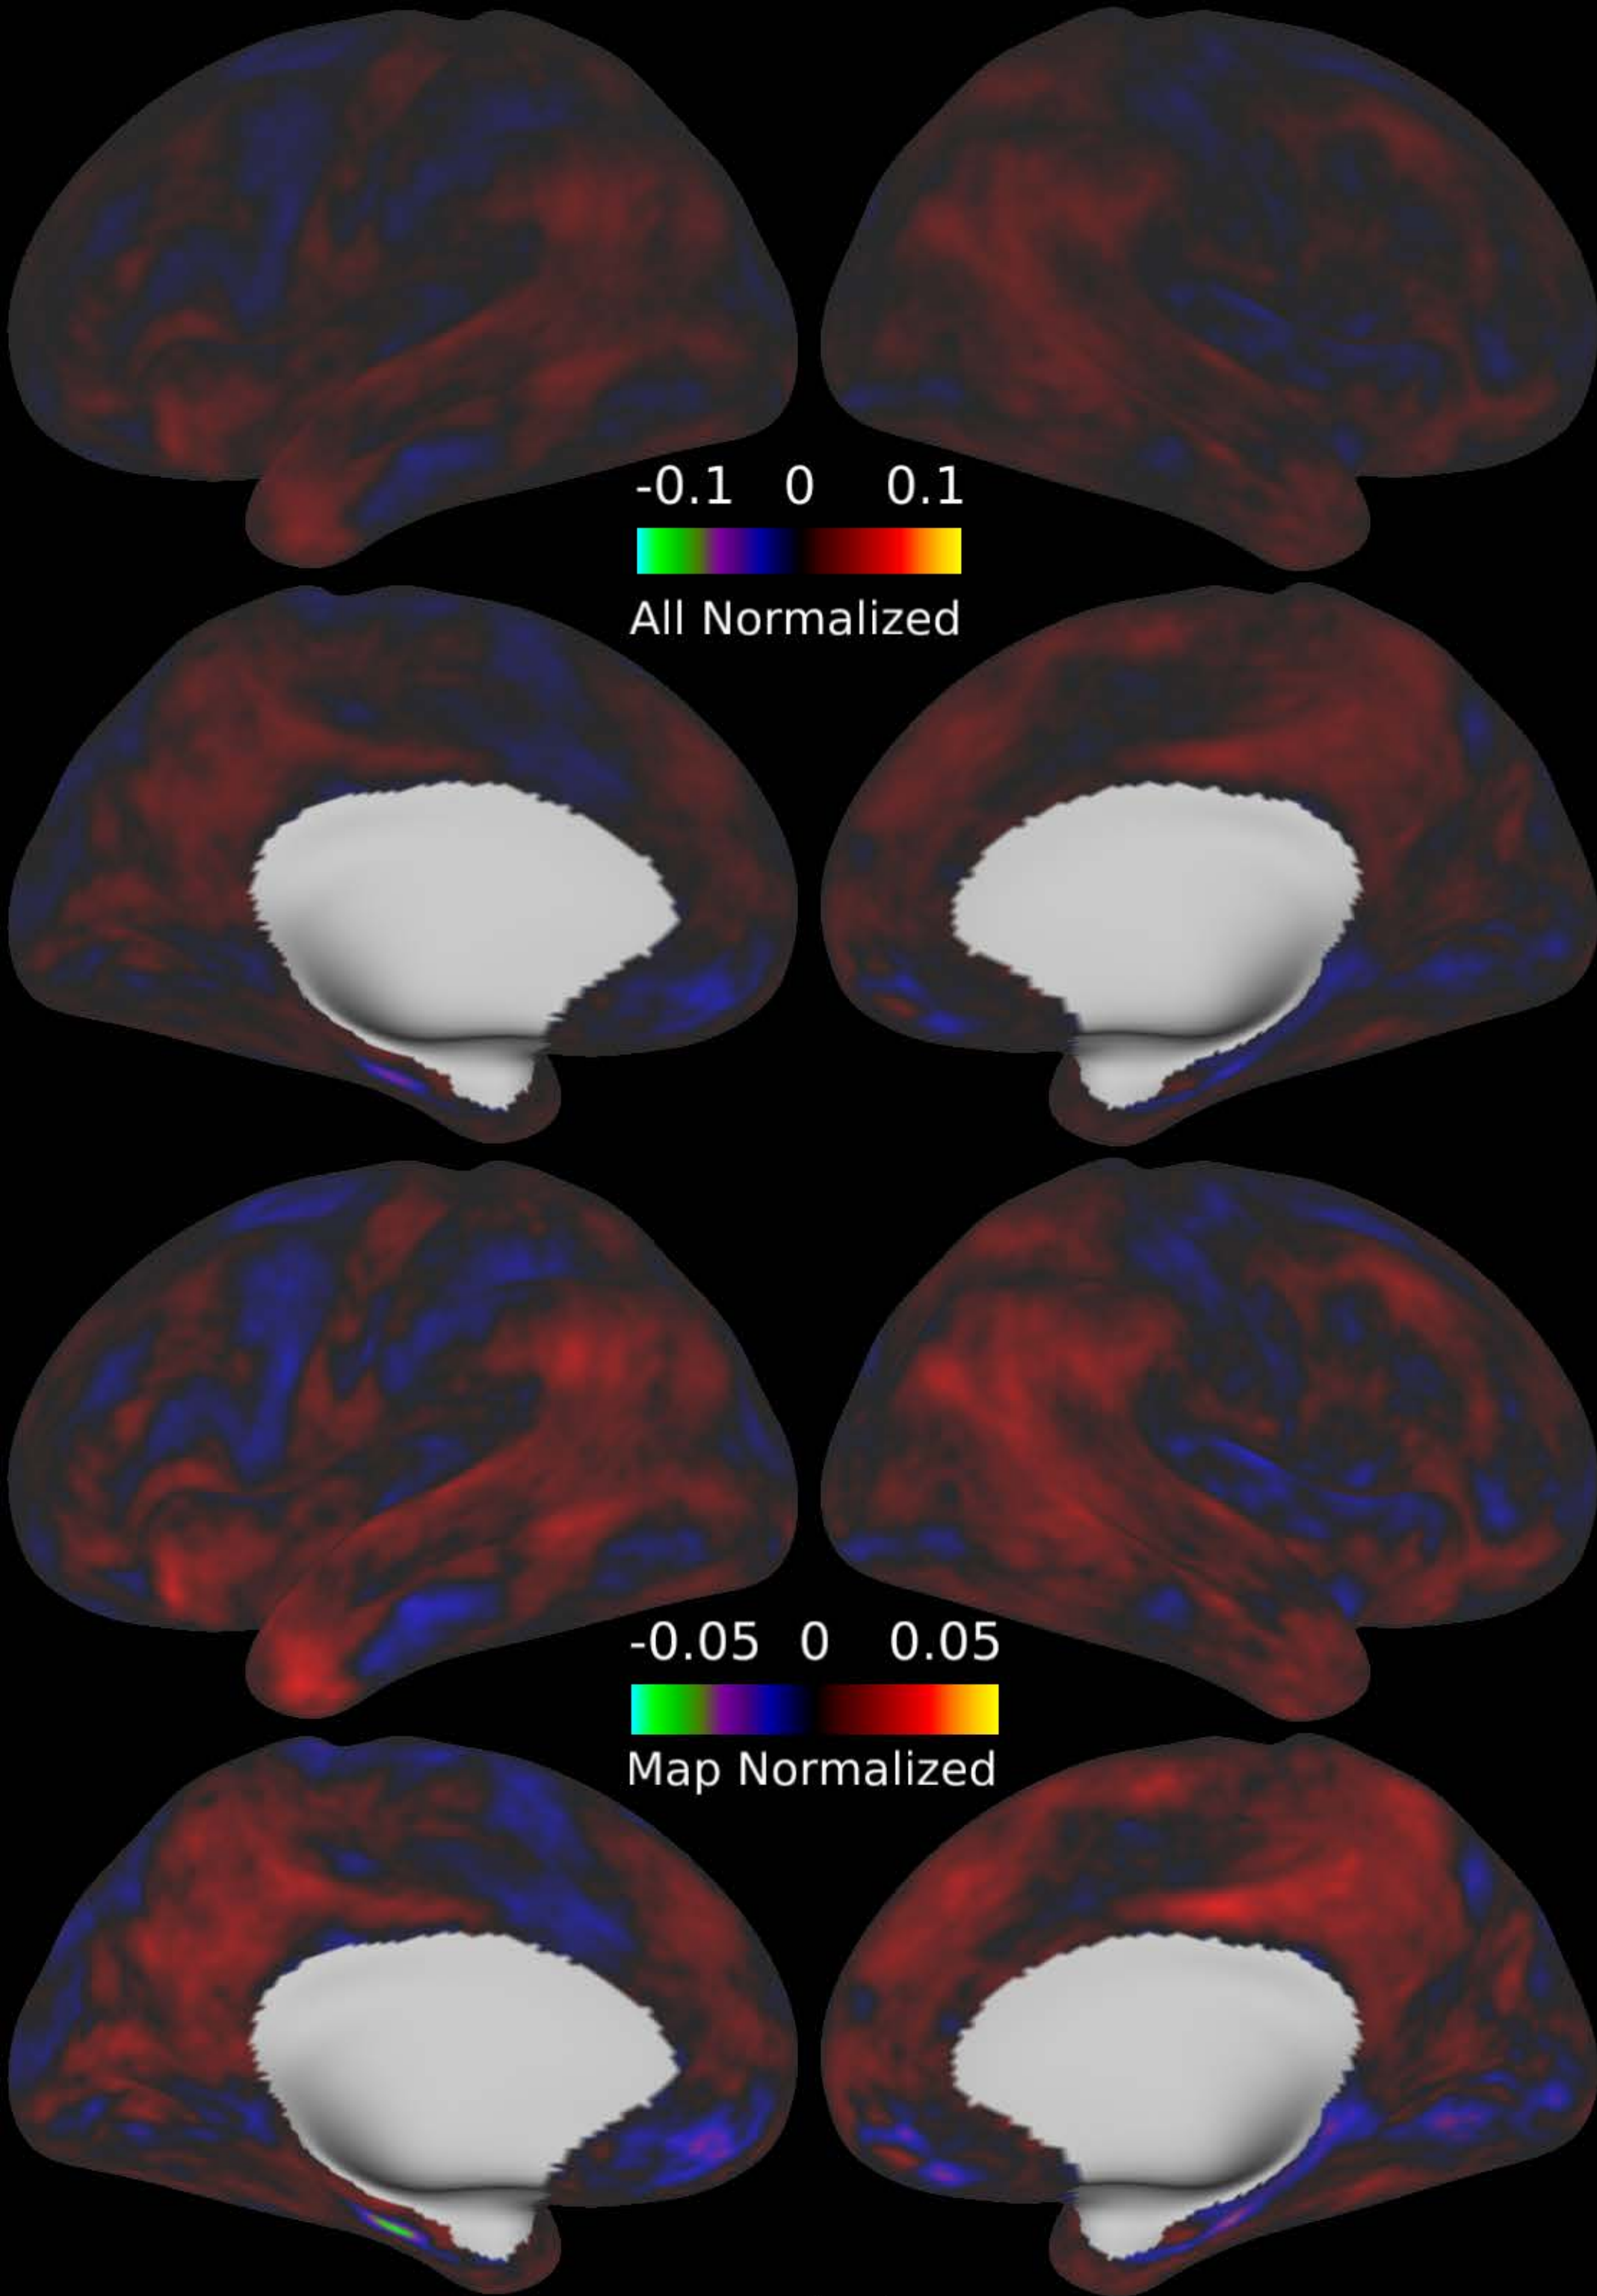

Hertz

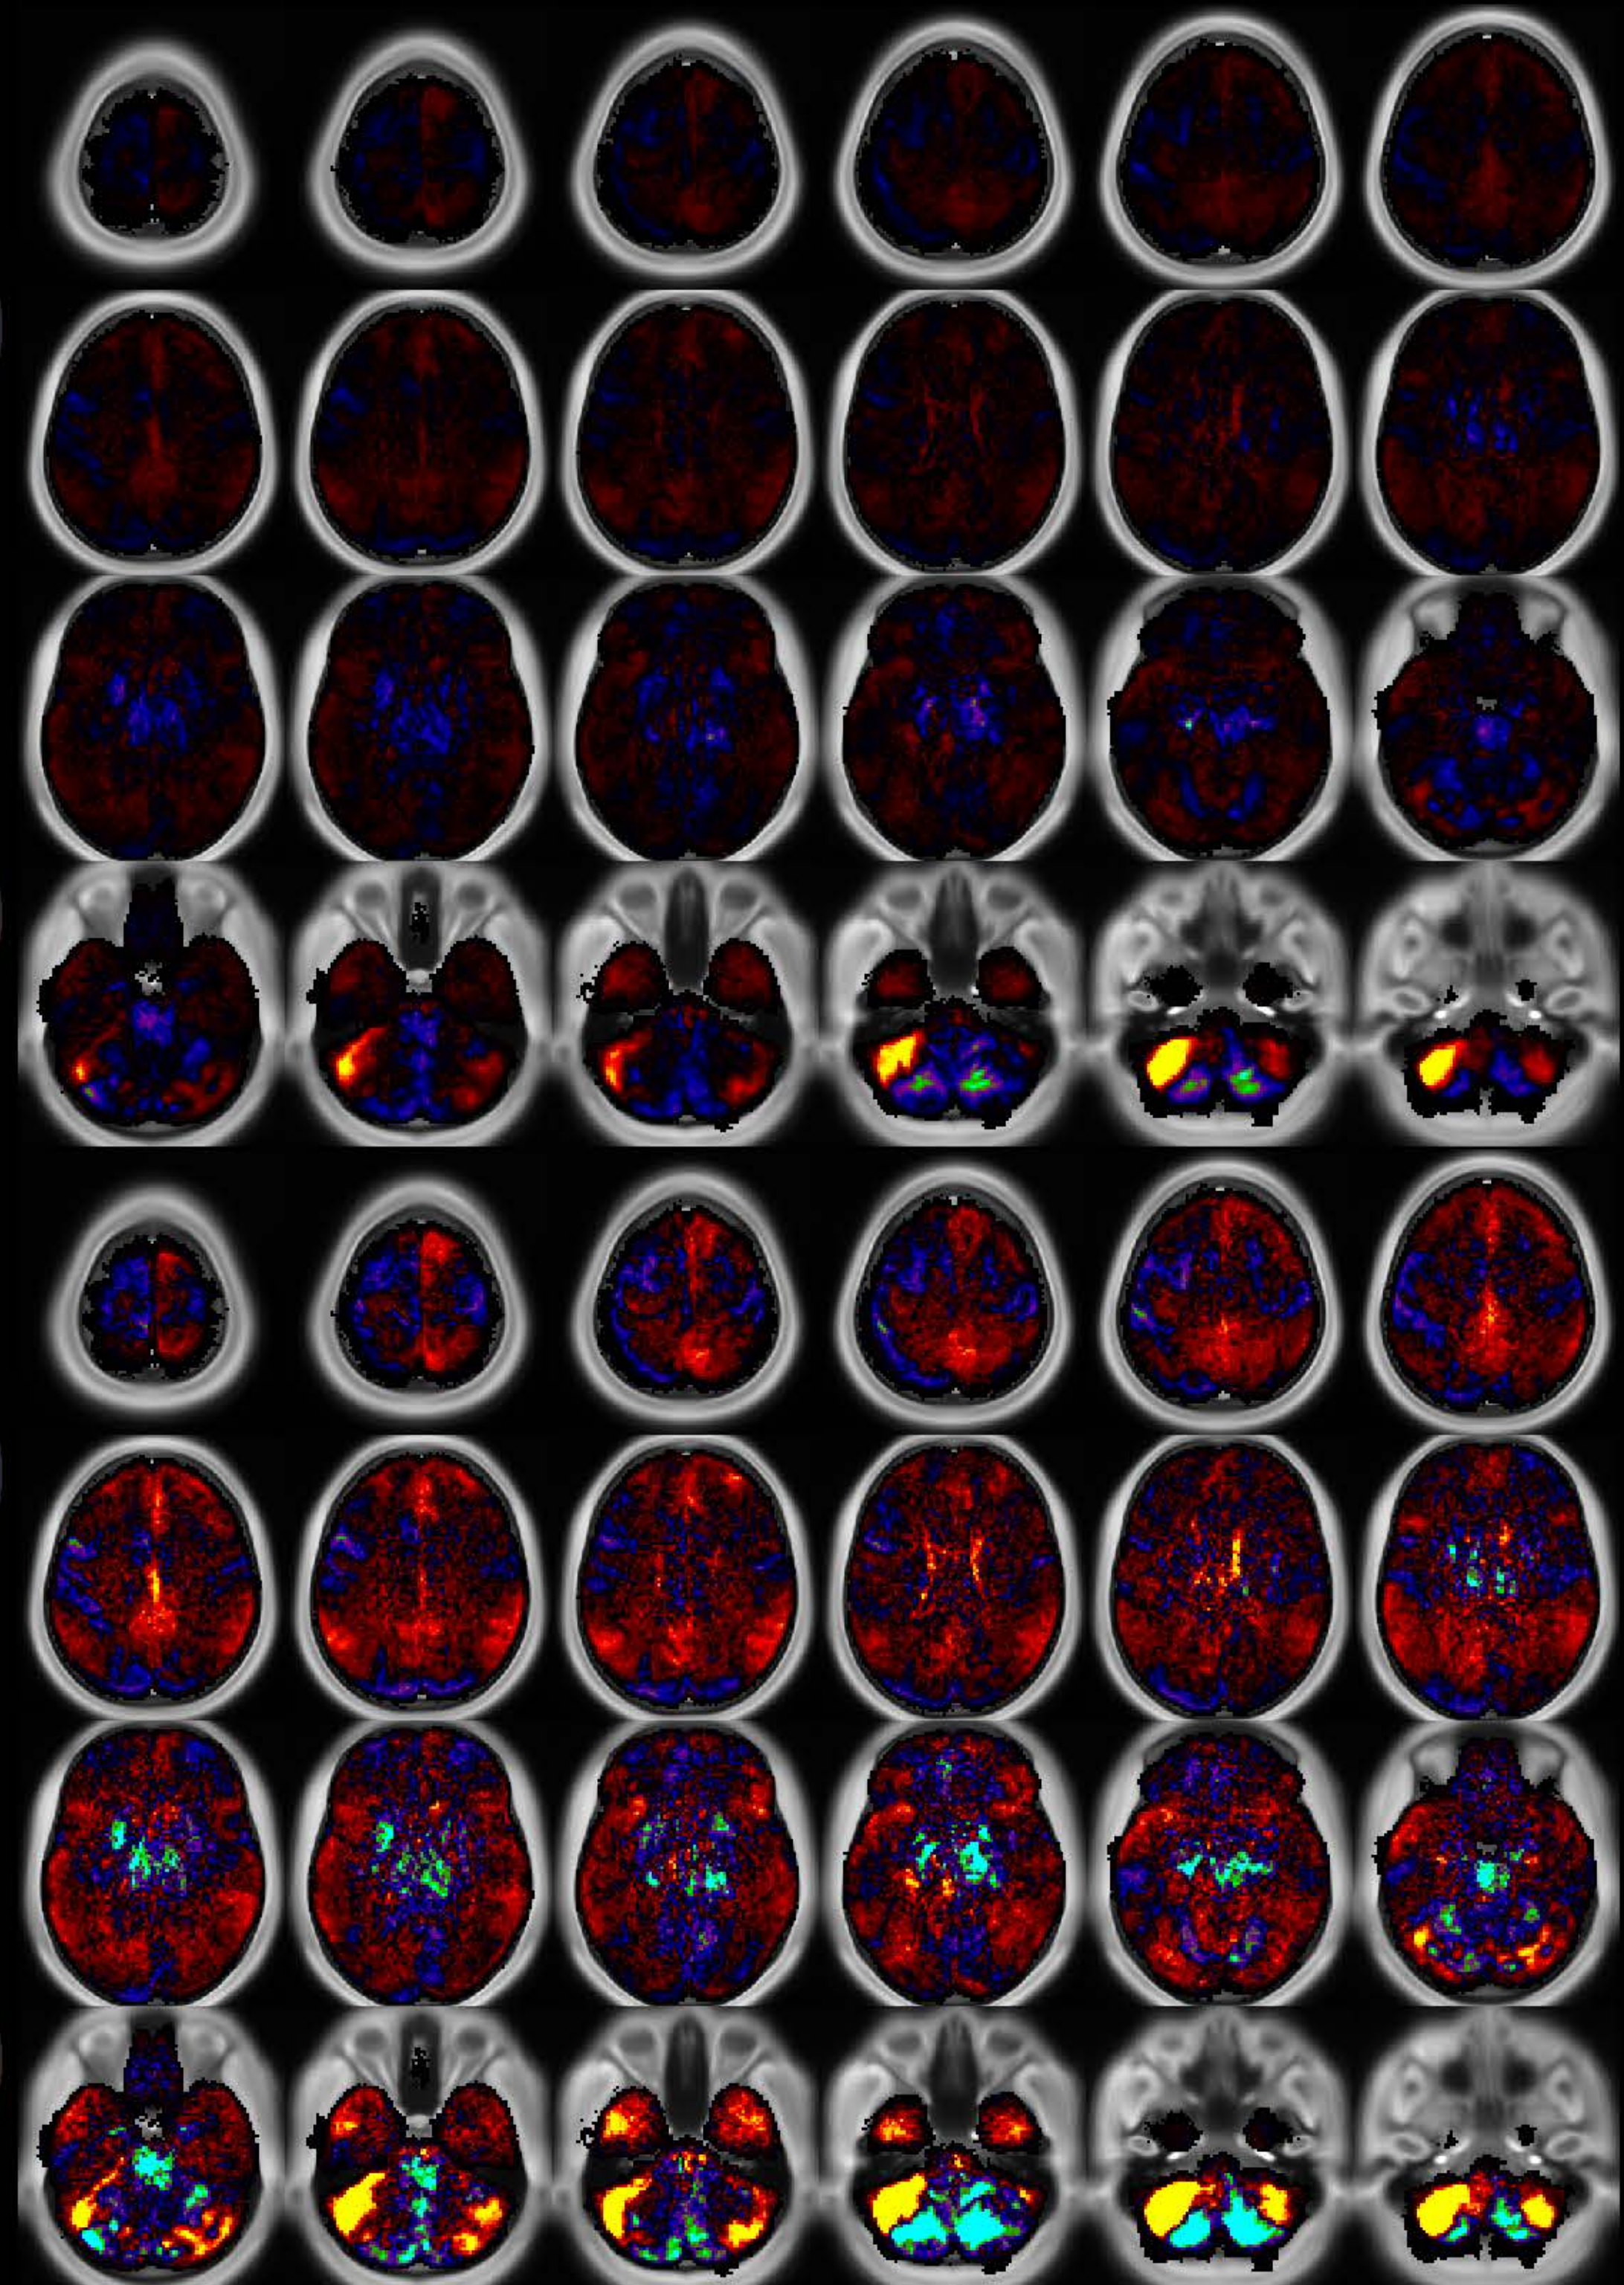

Seconds

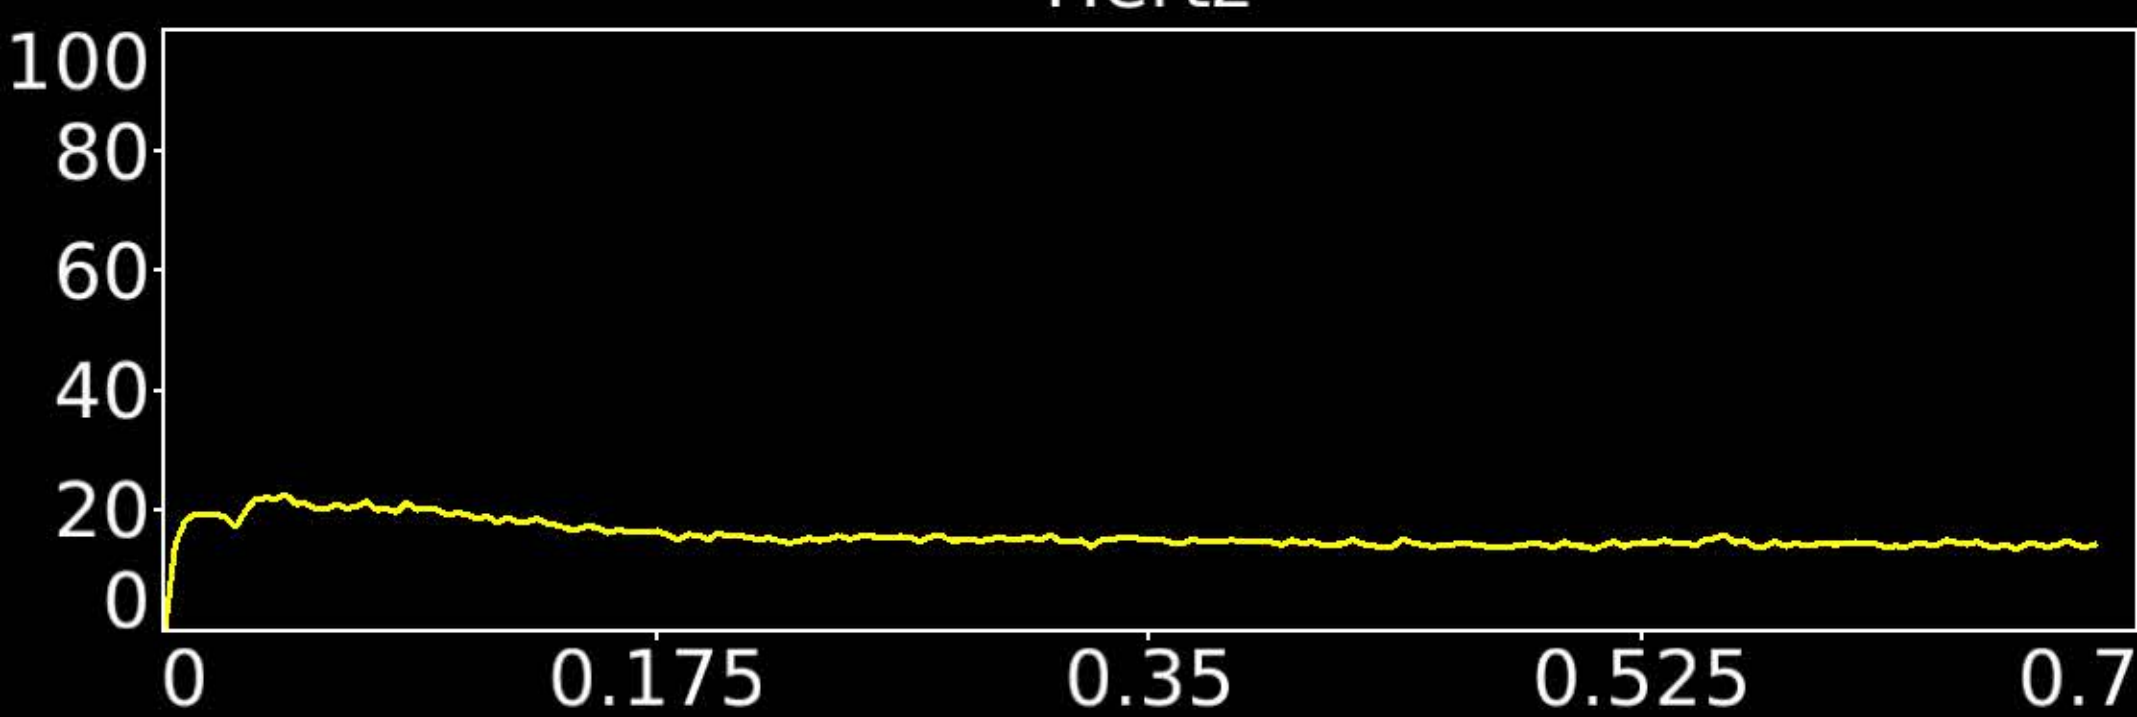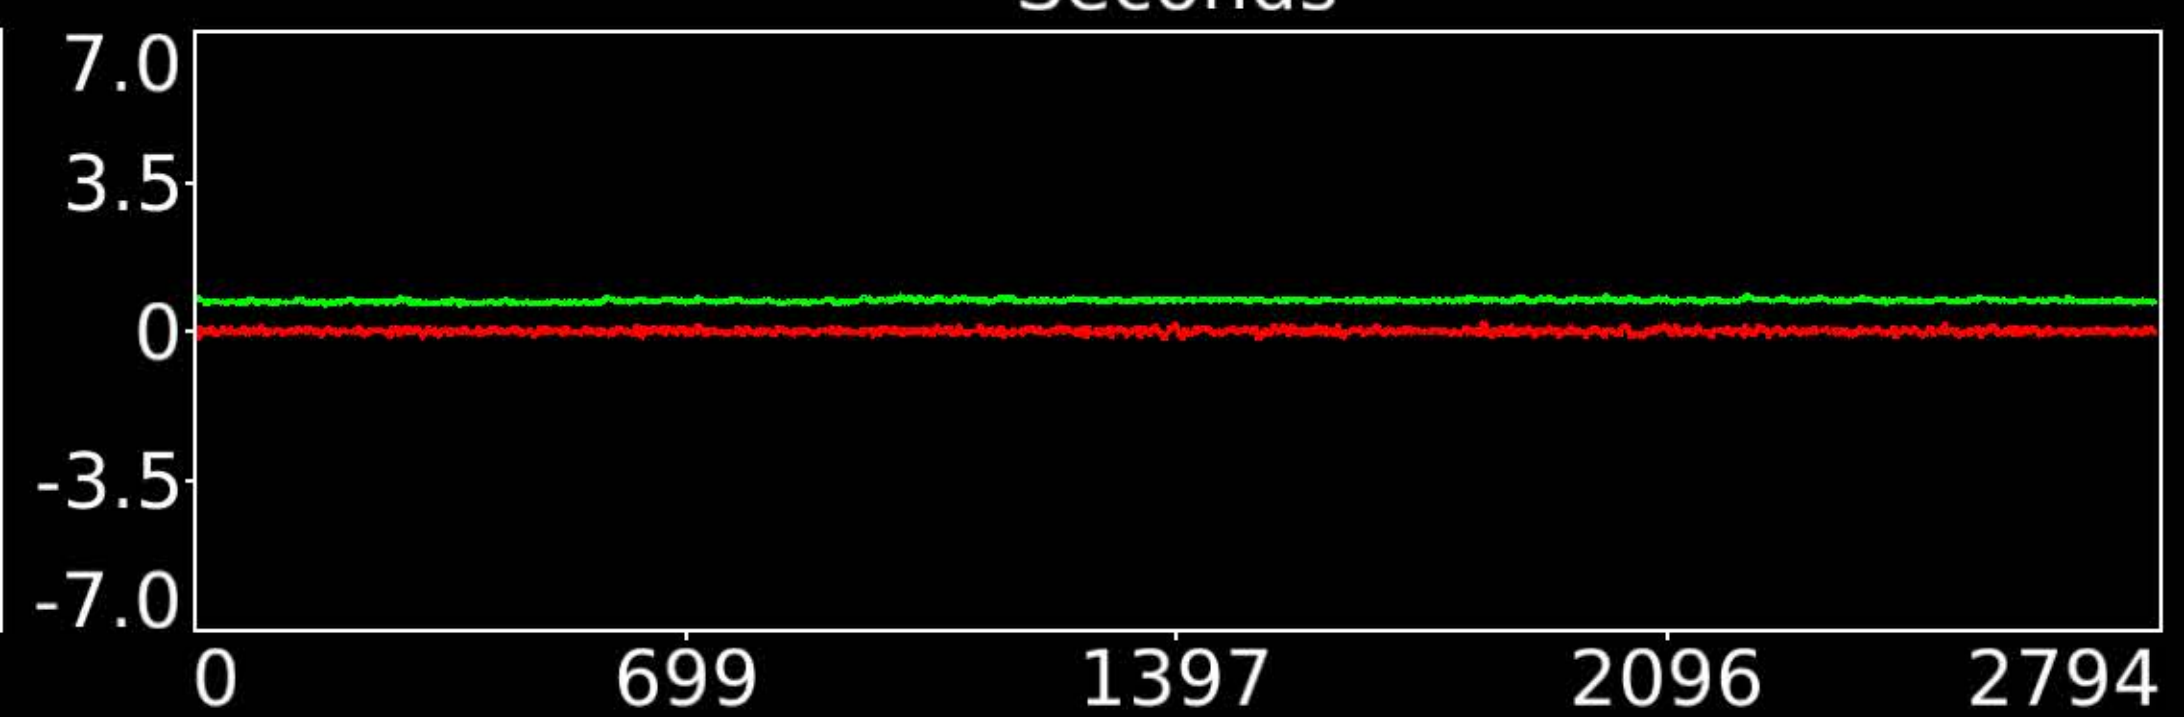

|                                                                           |                            |                                       |  |
|---------------------------------------------------------------------------|----------------------------|---------------------------------------|--|
| Number & Class: 42 Noise                                                  |                            | Name: L Cerebellum Near Sigmoid Sinus |  |
| RVT Correlated: No                                                        | DVARS Dip Associated: No   | Cross-Subject Variable: No            |  |
| Single Subject: Yes                                                       | % Variance Explained: 0.97 | Globality Index: 0.55                 |  |
| Task Component: 46                                                        | Rest Component: No         | Task Modulated: No                    |  |
| Rationale: Single subject component not reflective of known areas or RSNs |                            |                                       |  |



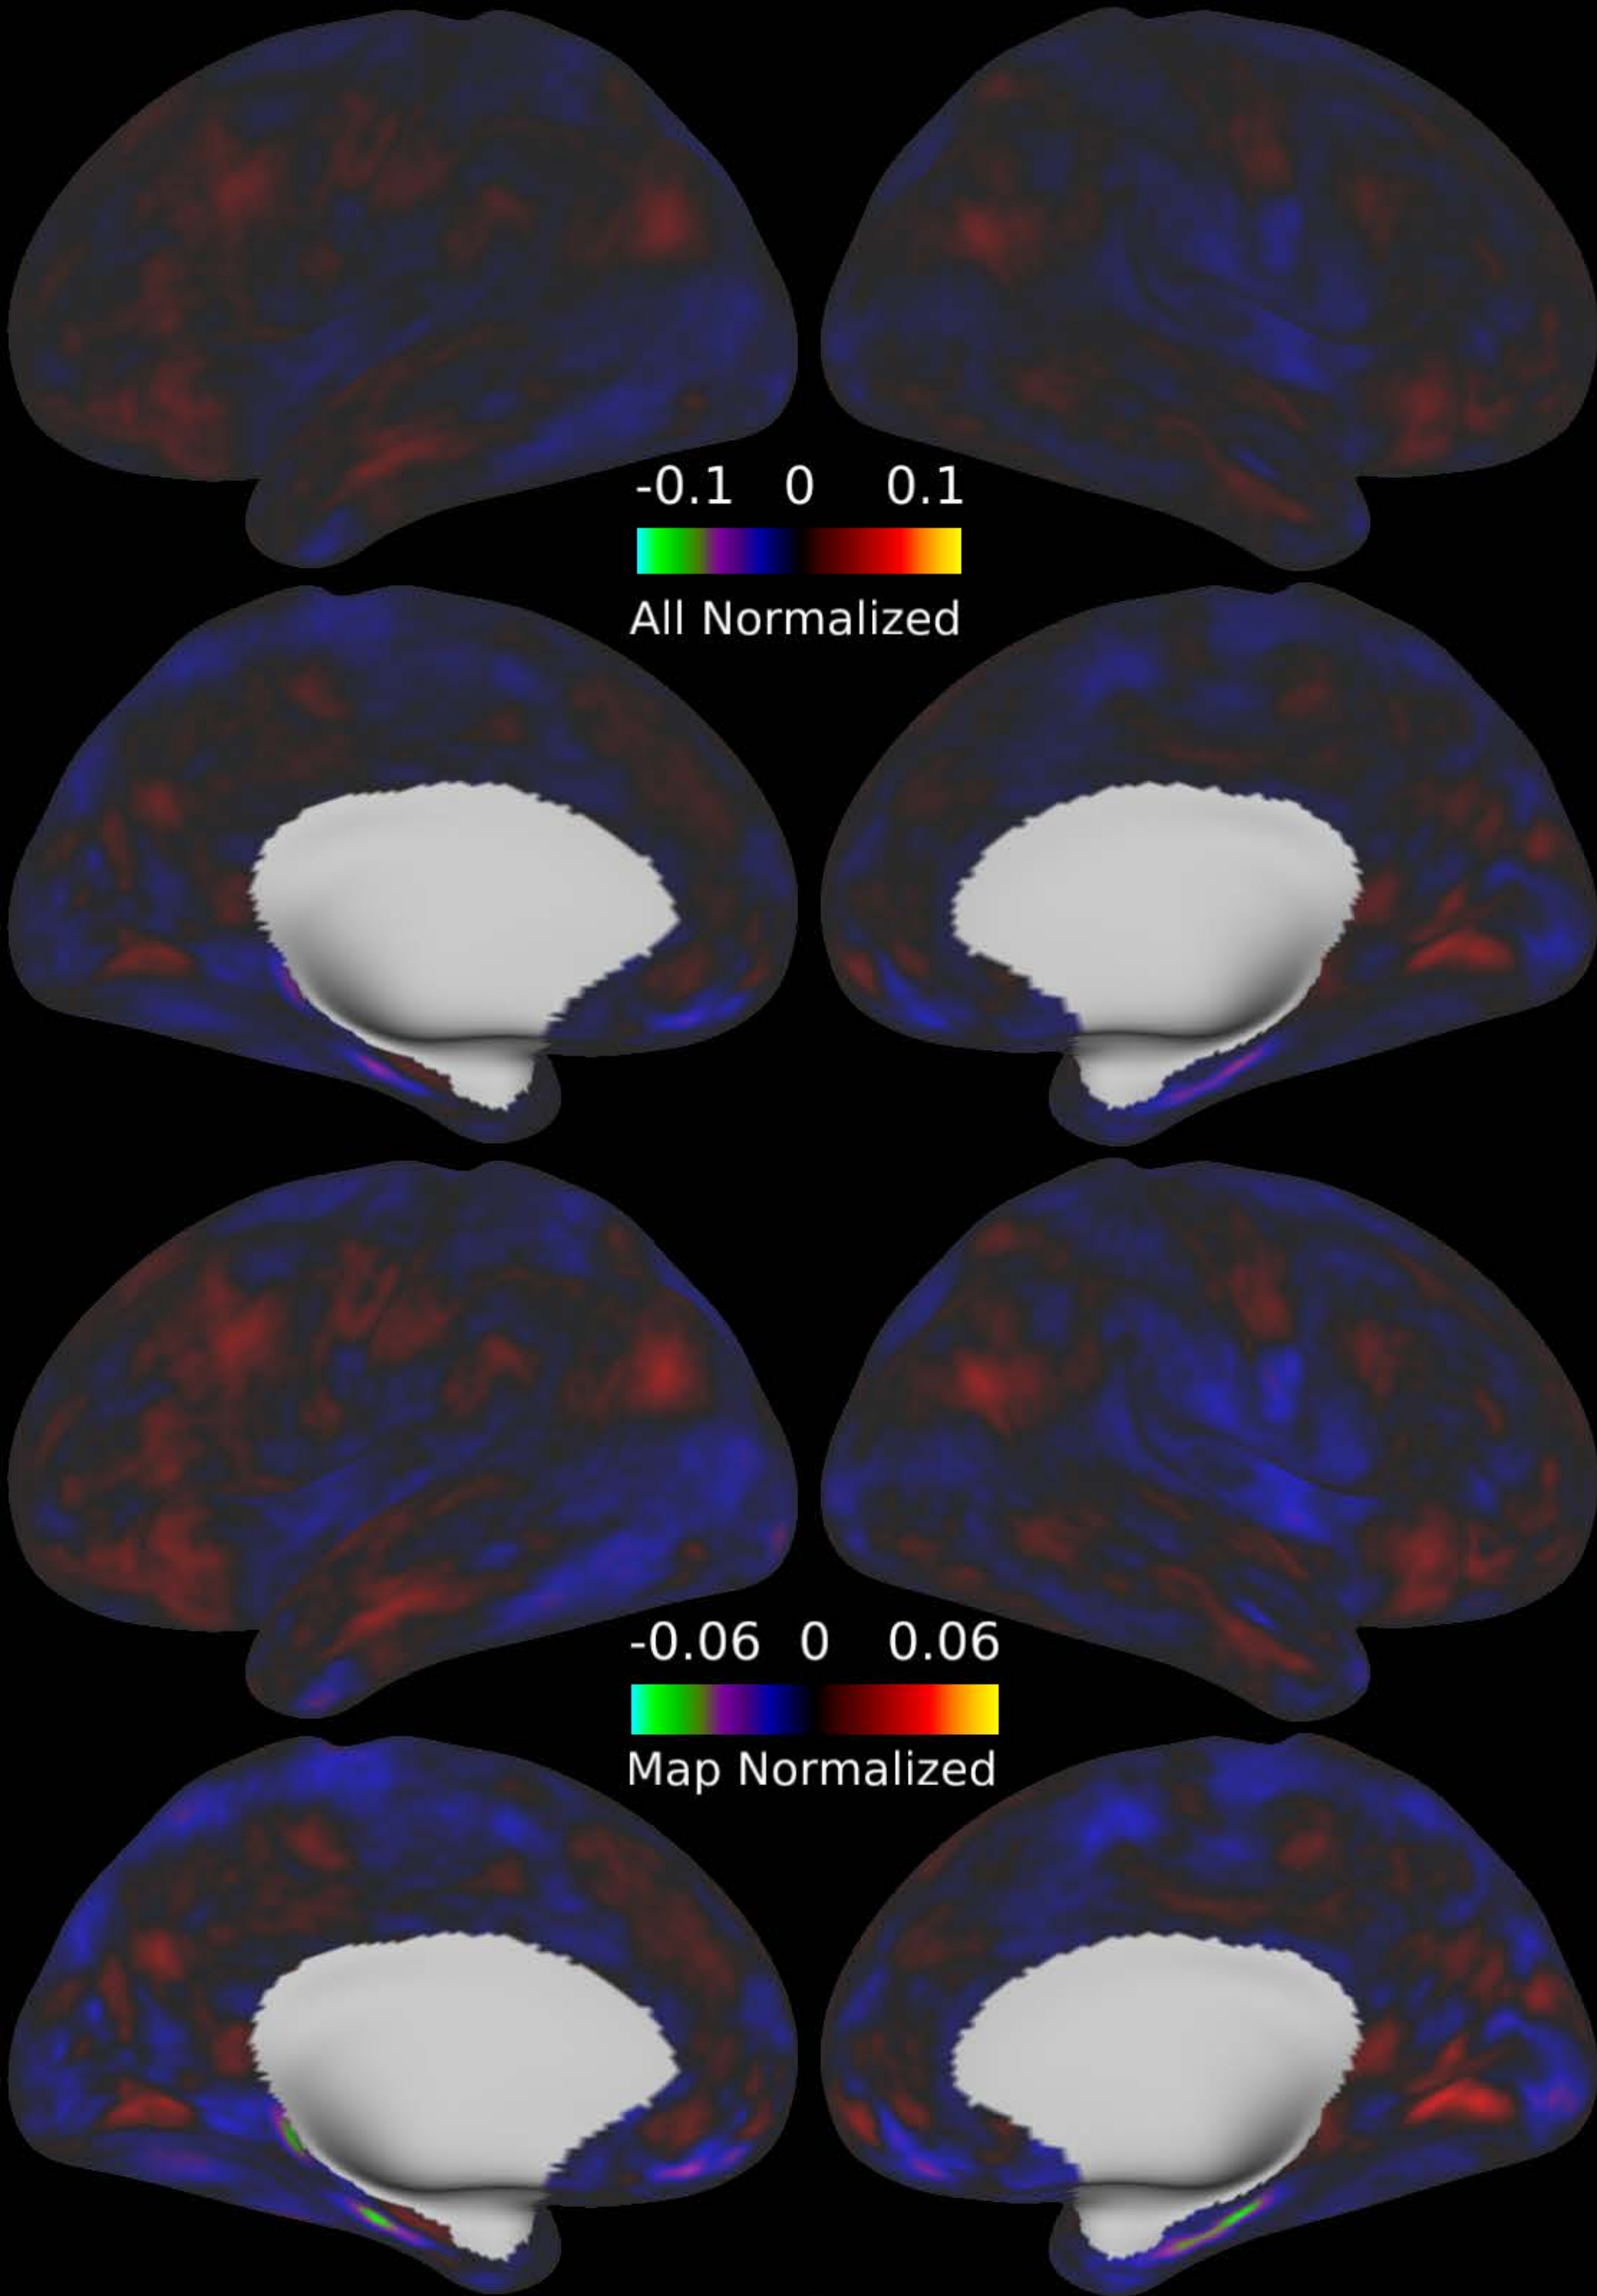

Hertz

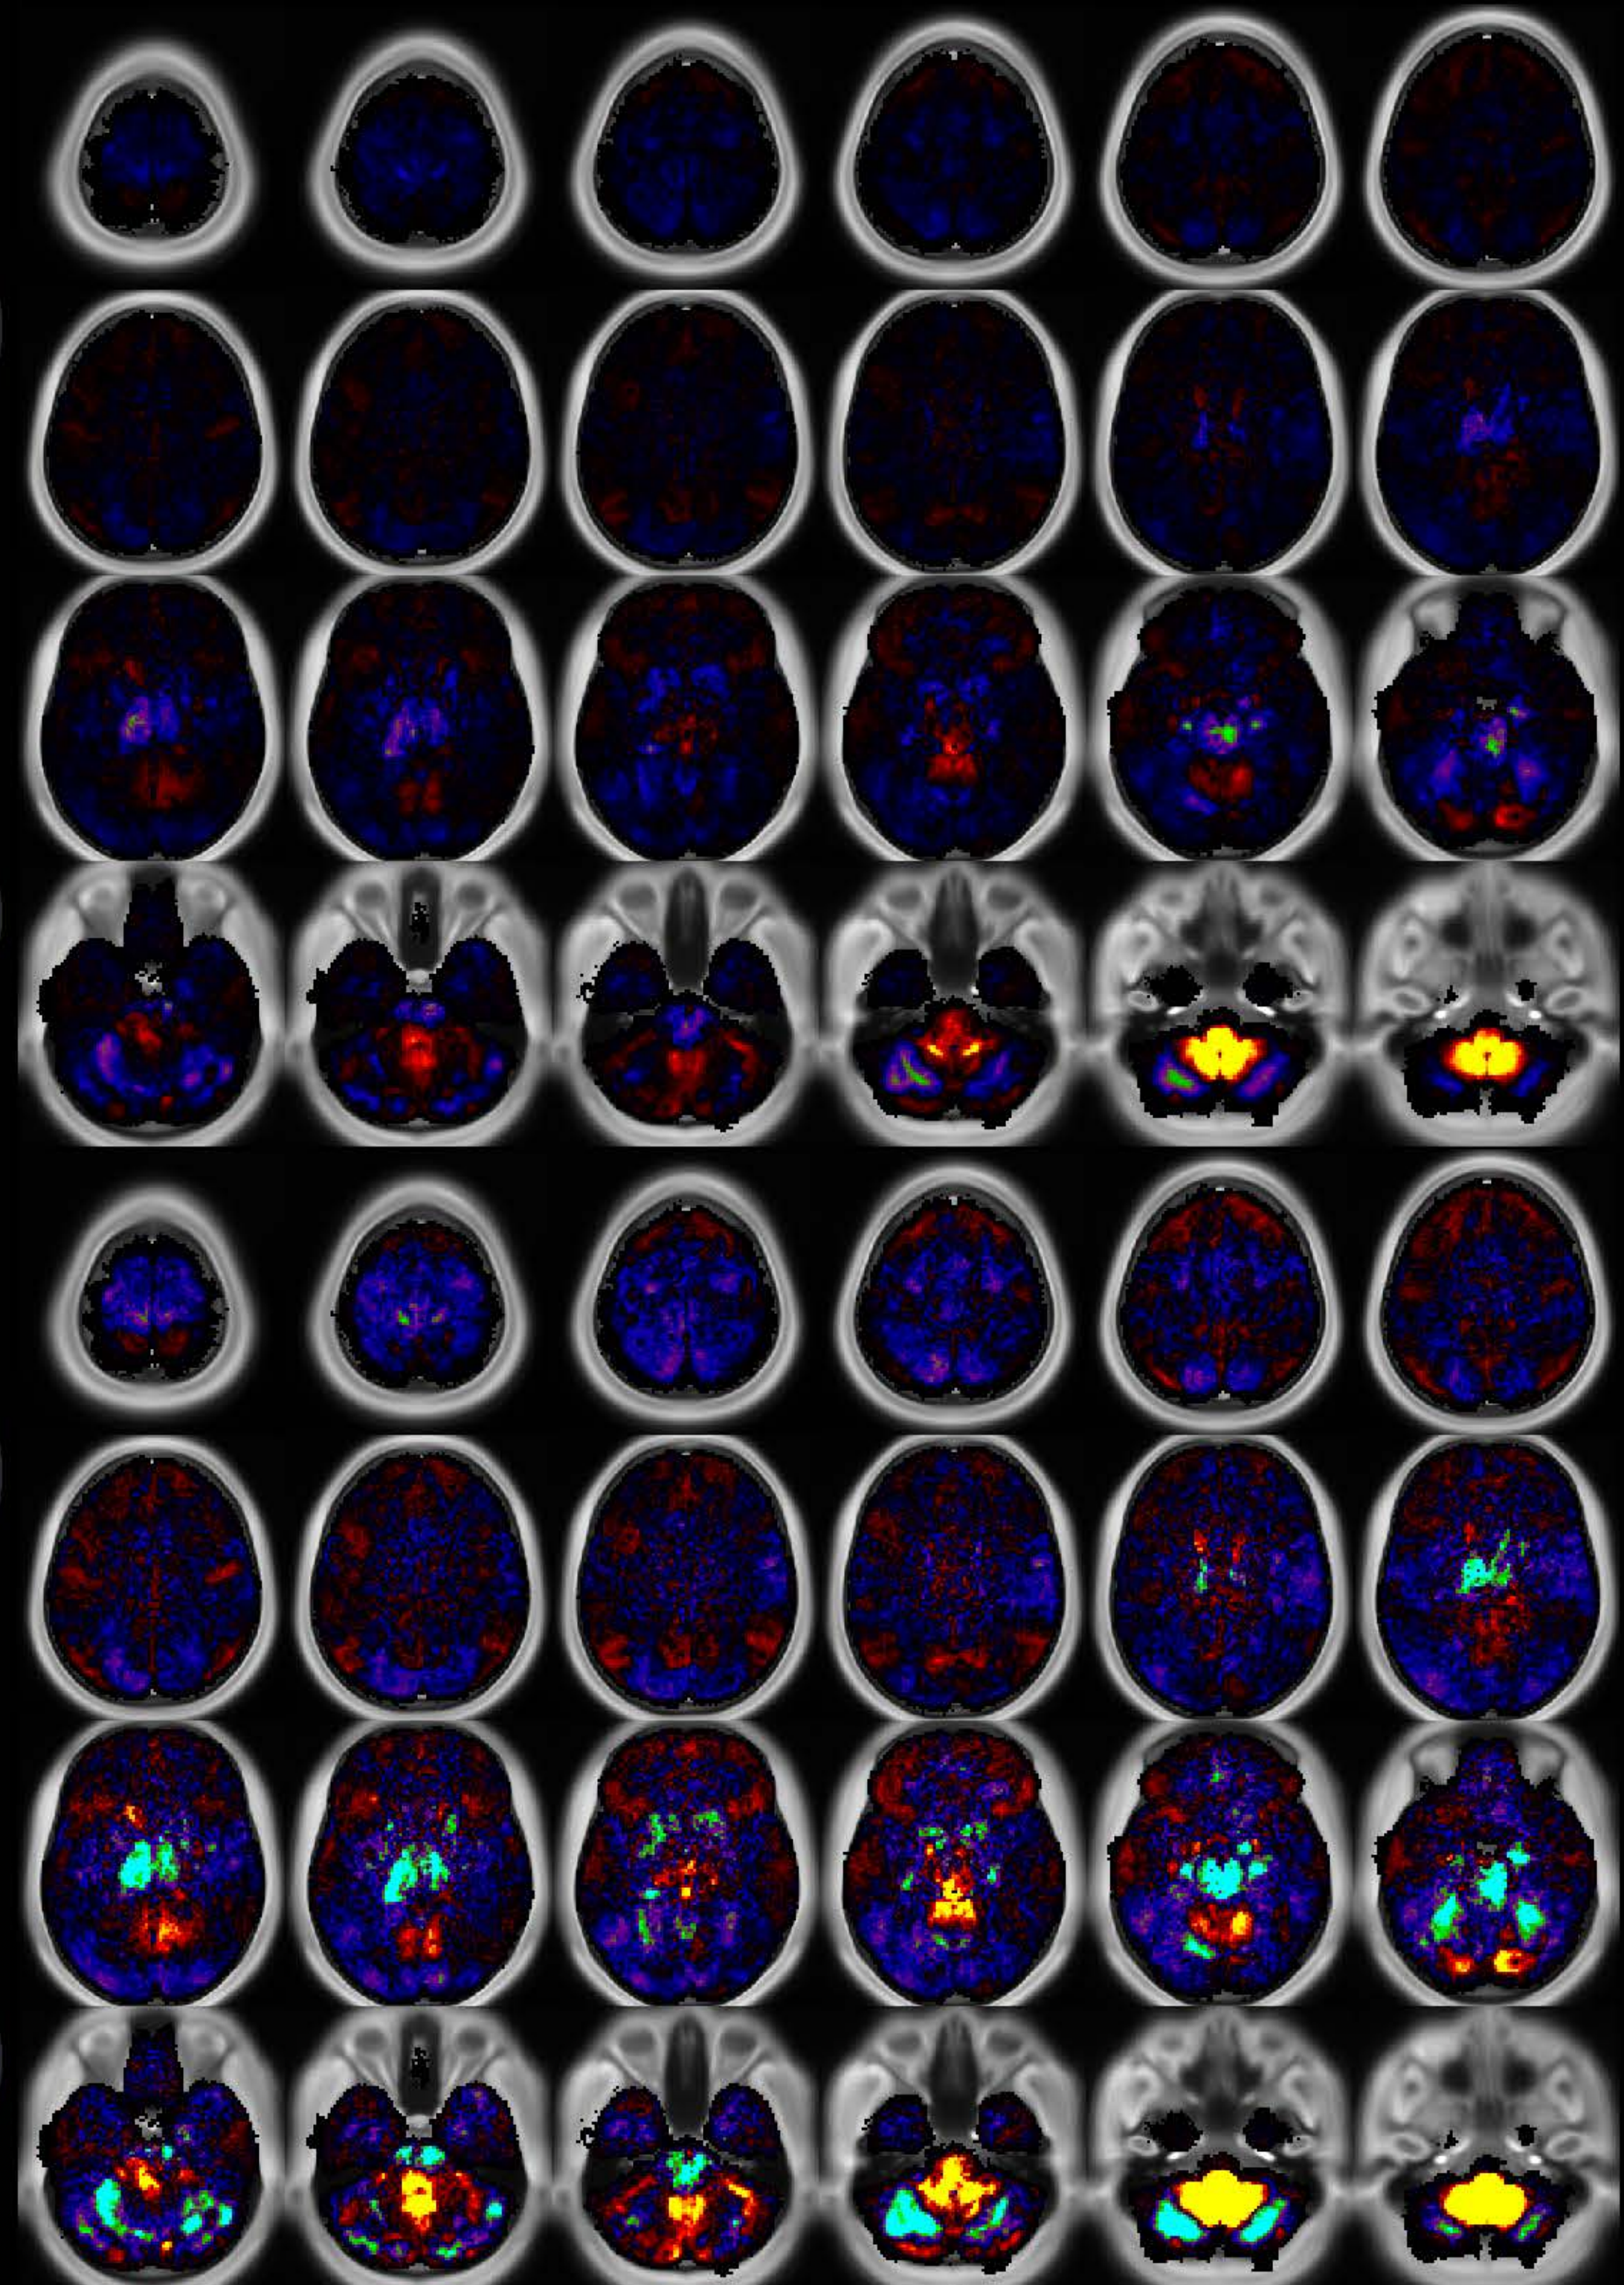

Seconds

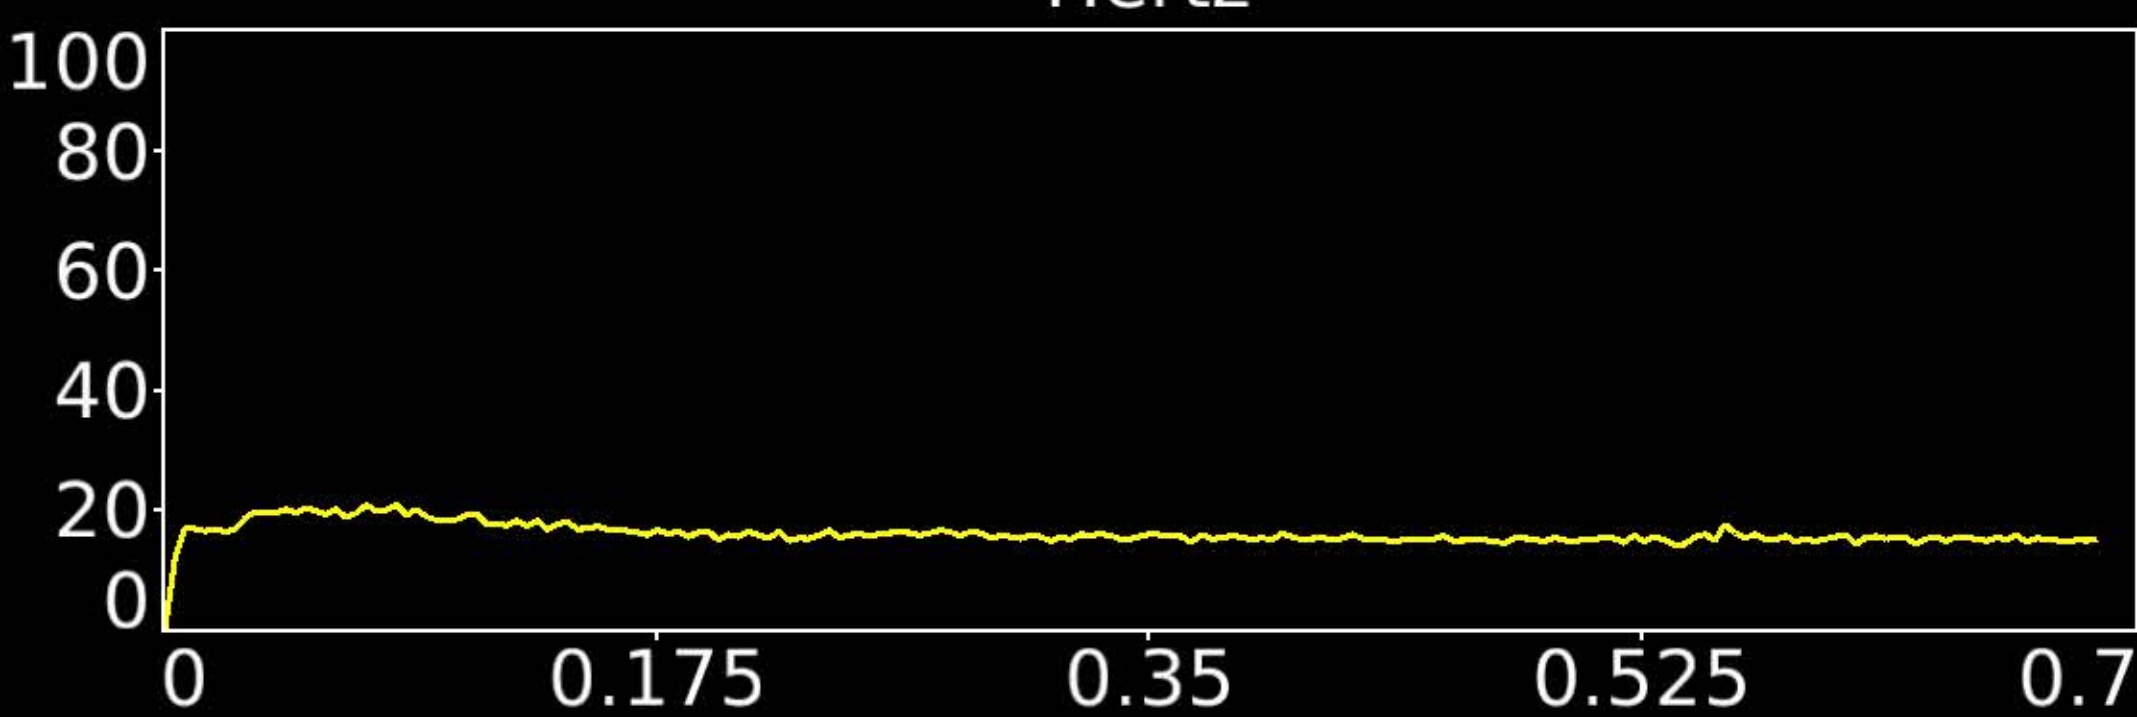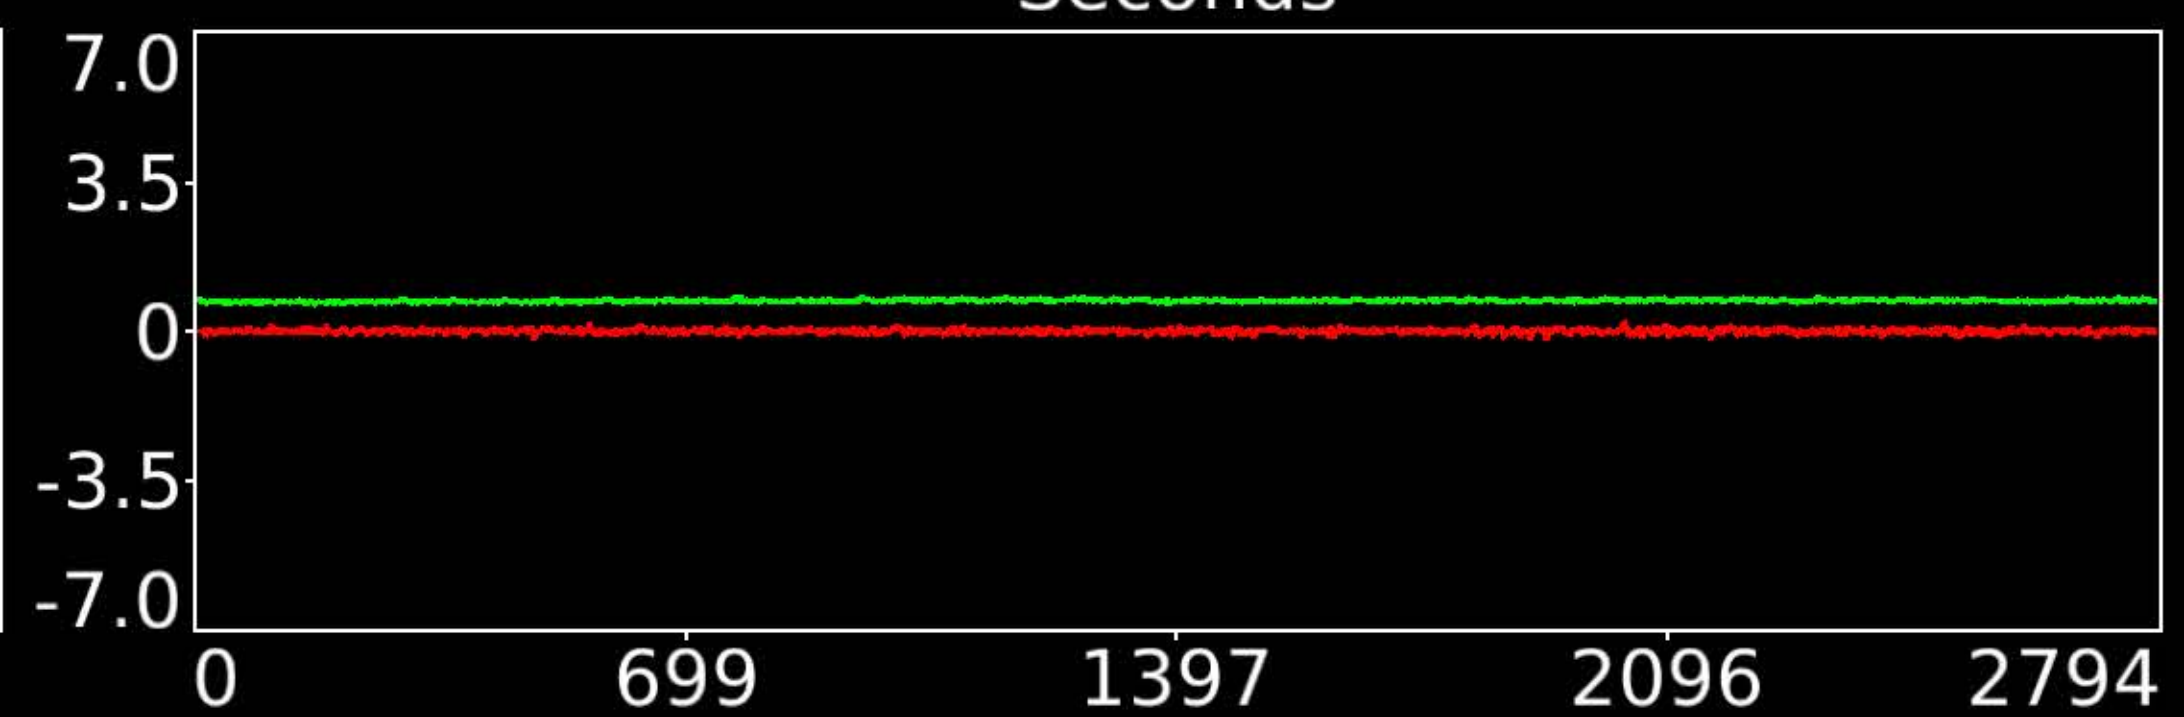

Number & Class: 43 Noise

Name: Cerebellar + Brainstem Recon Artifact

RVT Correlated: No

DVARS Dip Associated: No

Cross-Subject Variable: No

Single Subject: Yes

% Variance Explained: 0.96

Globality Index: 0.83

Task Component: 49

Rest Component: No

Task Modulated: No

Rationale: Spatial map not reflective of known areas or RSNs without connectivity to other brain structures; some banding in sagittal plane suggestive of multi-band recon



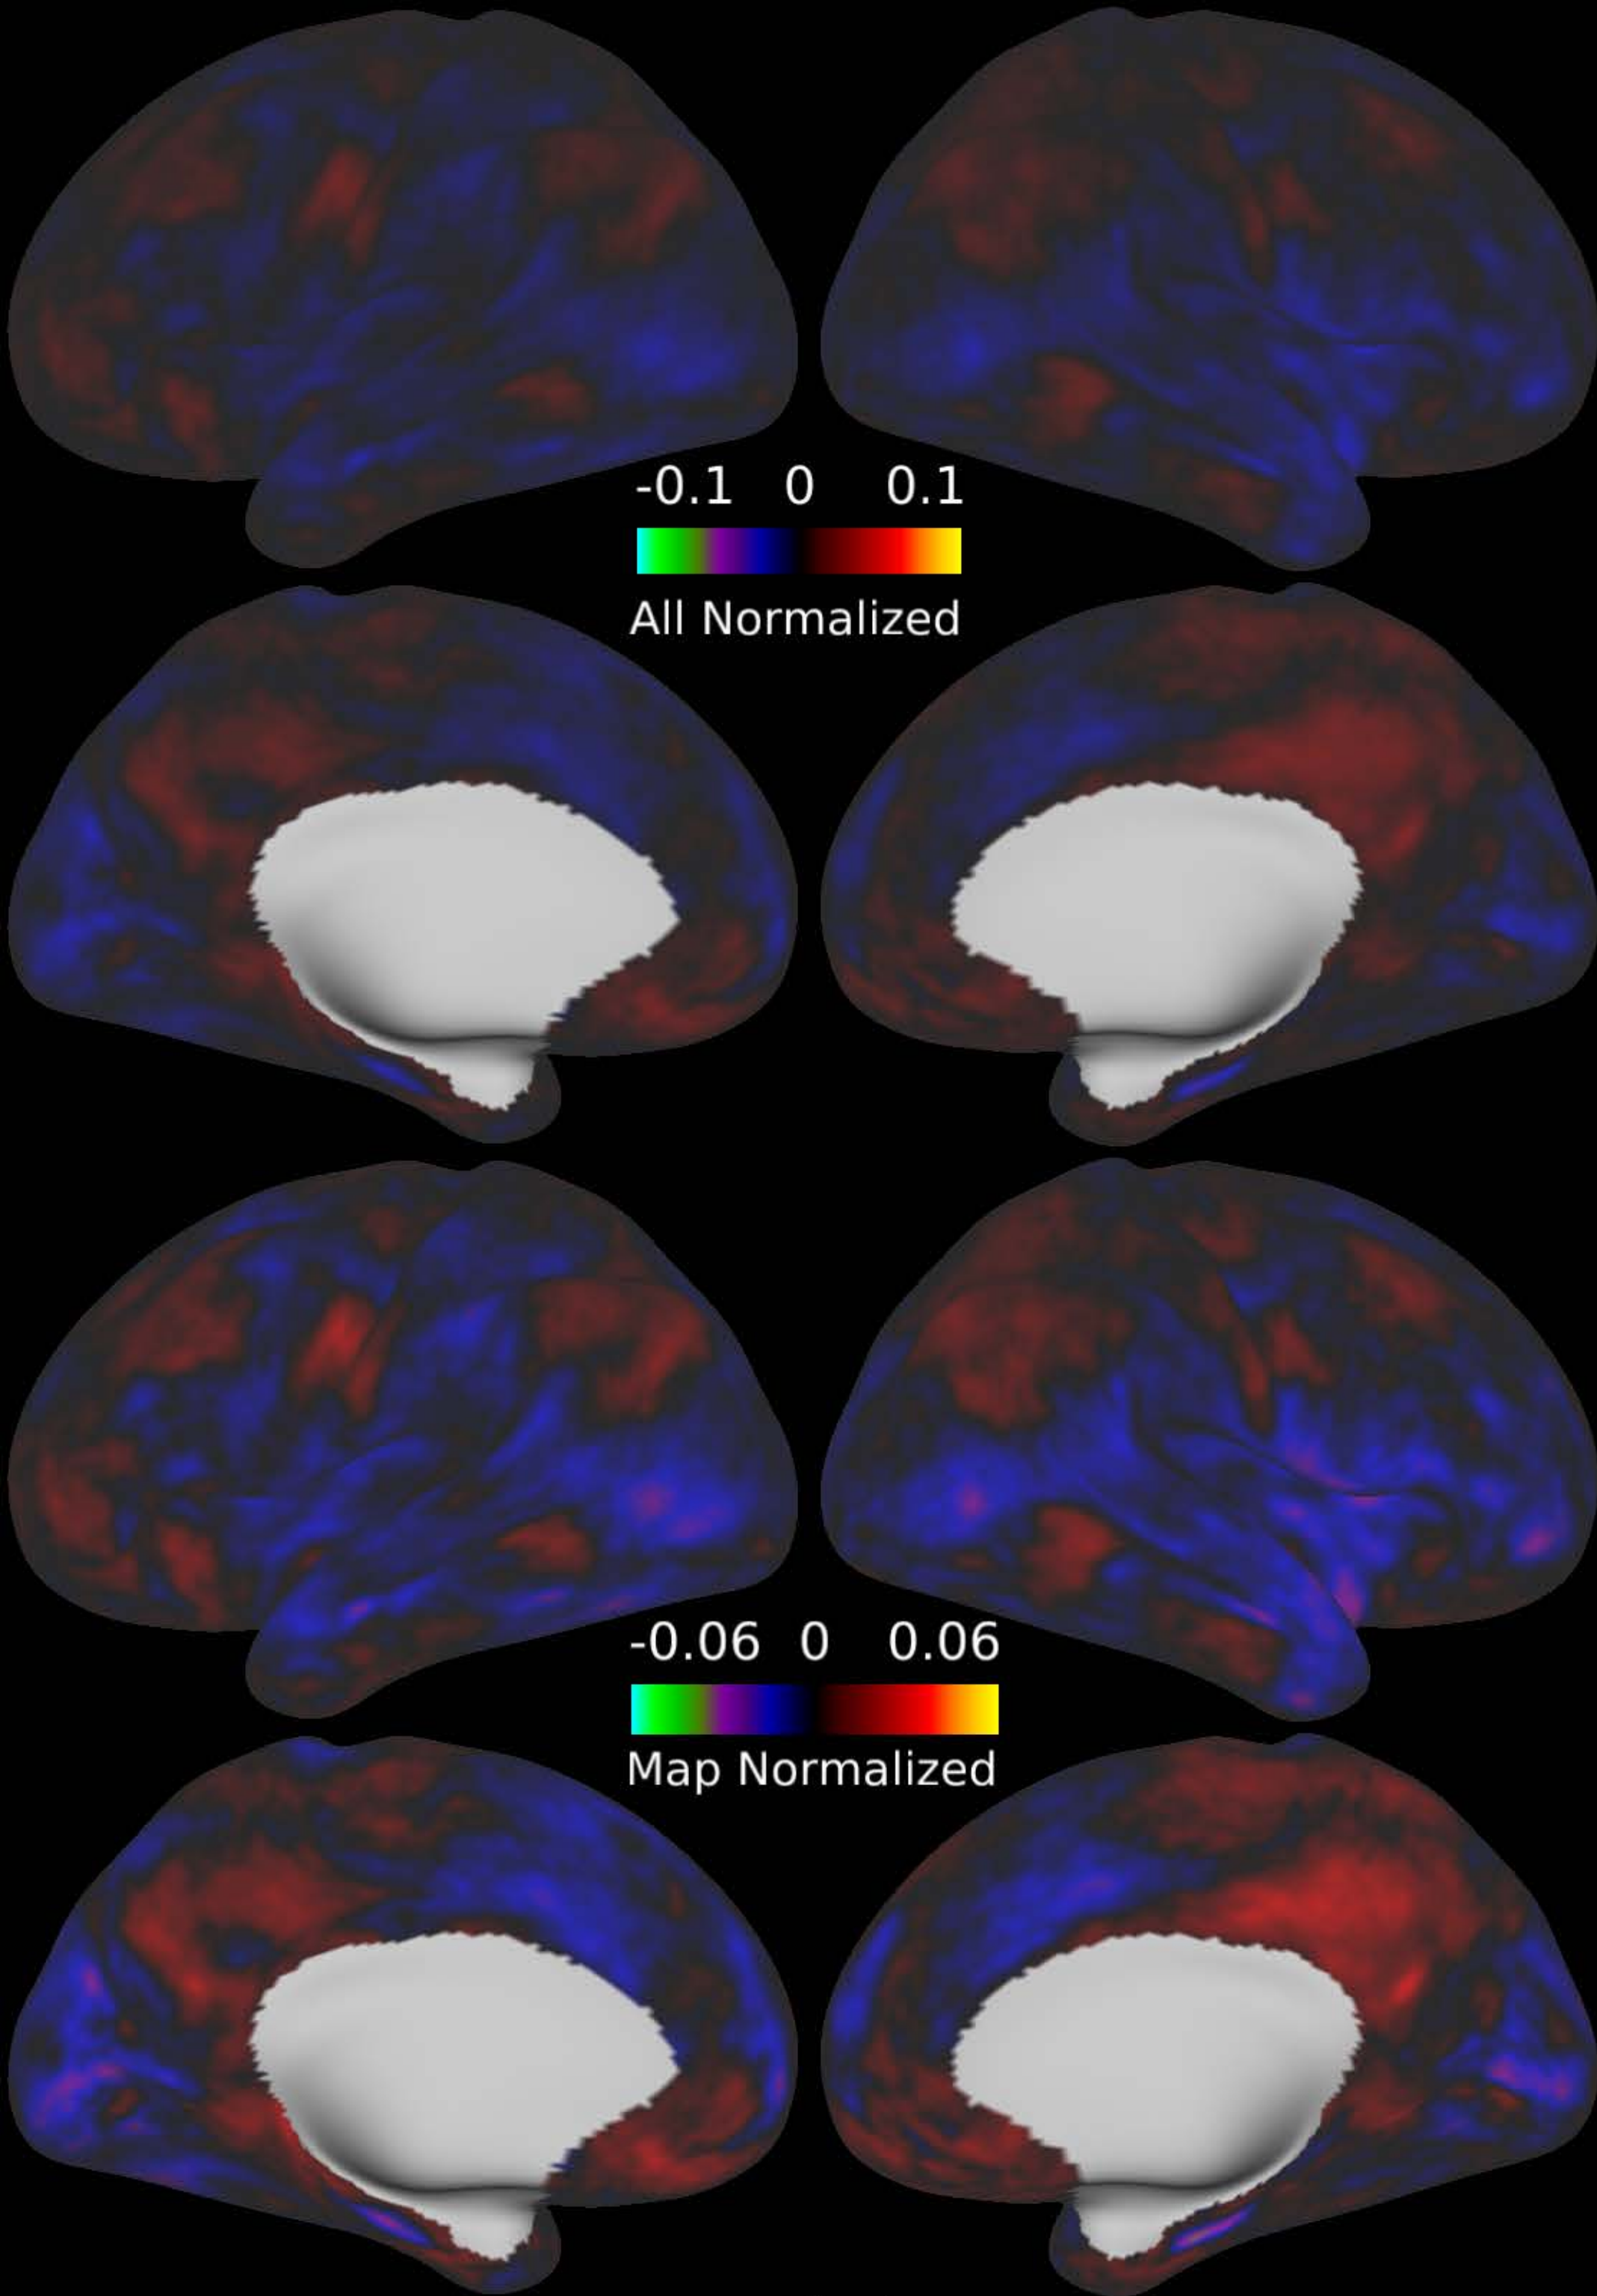

Hertz

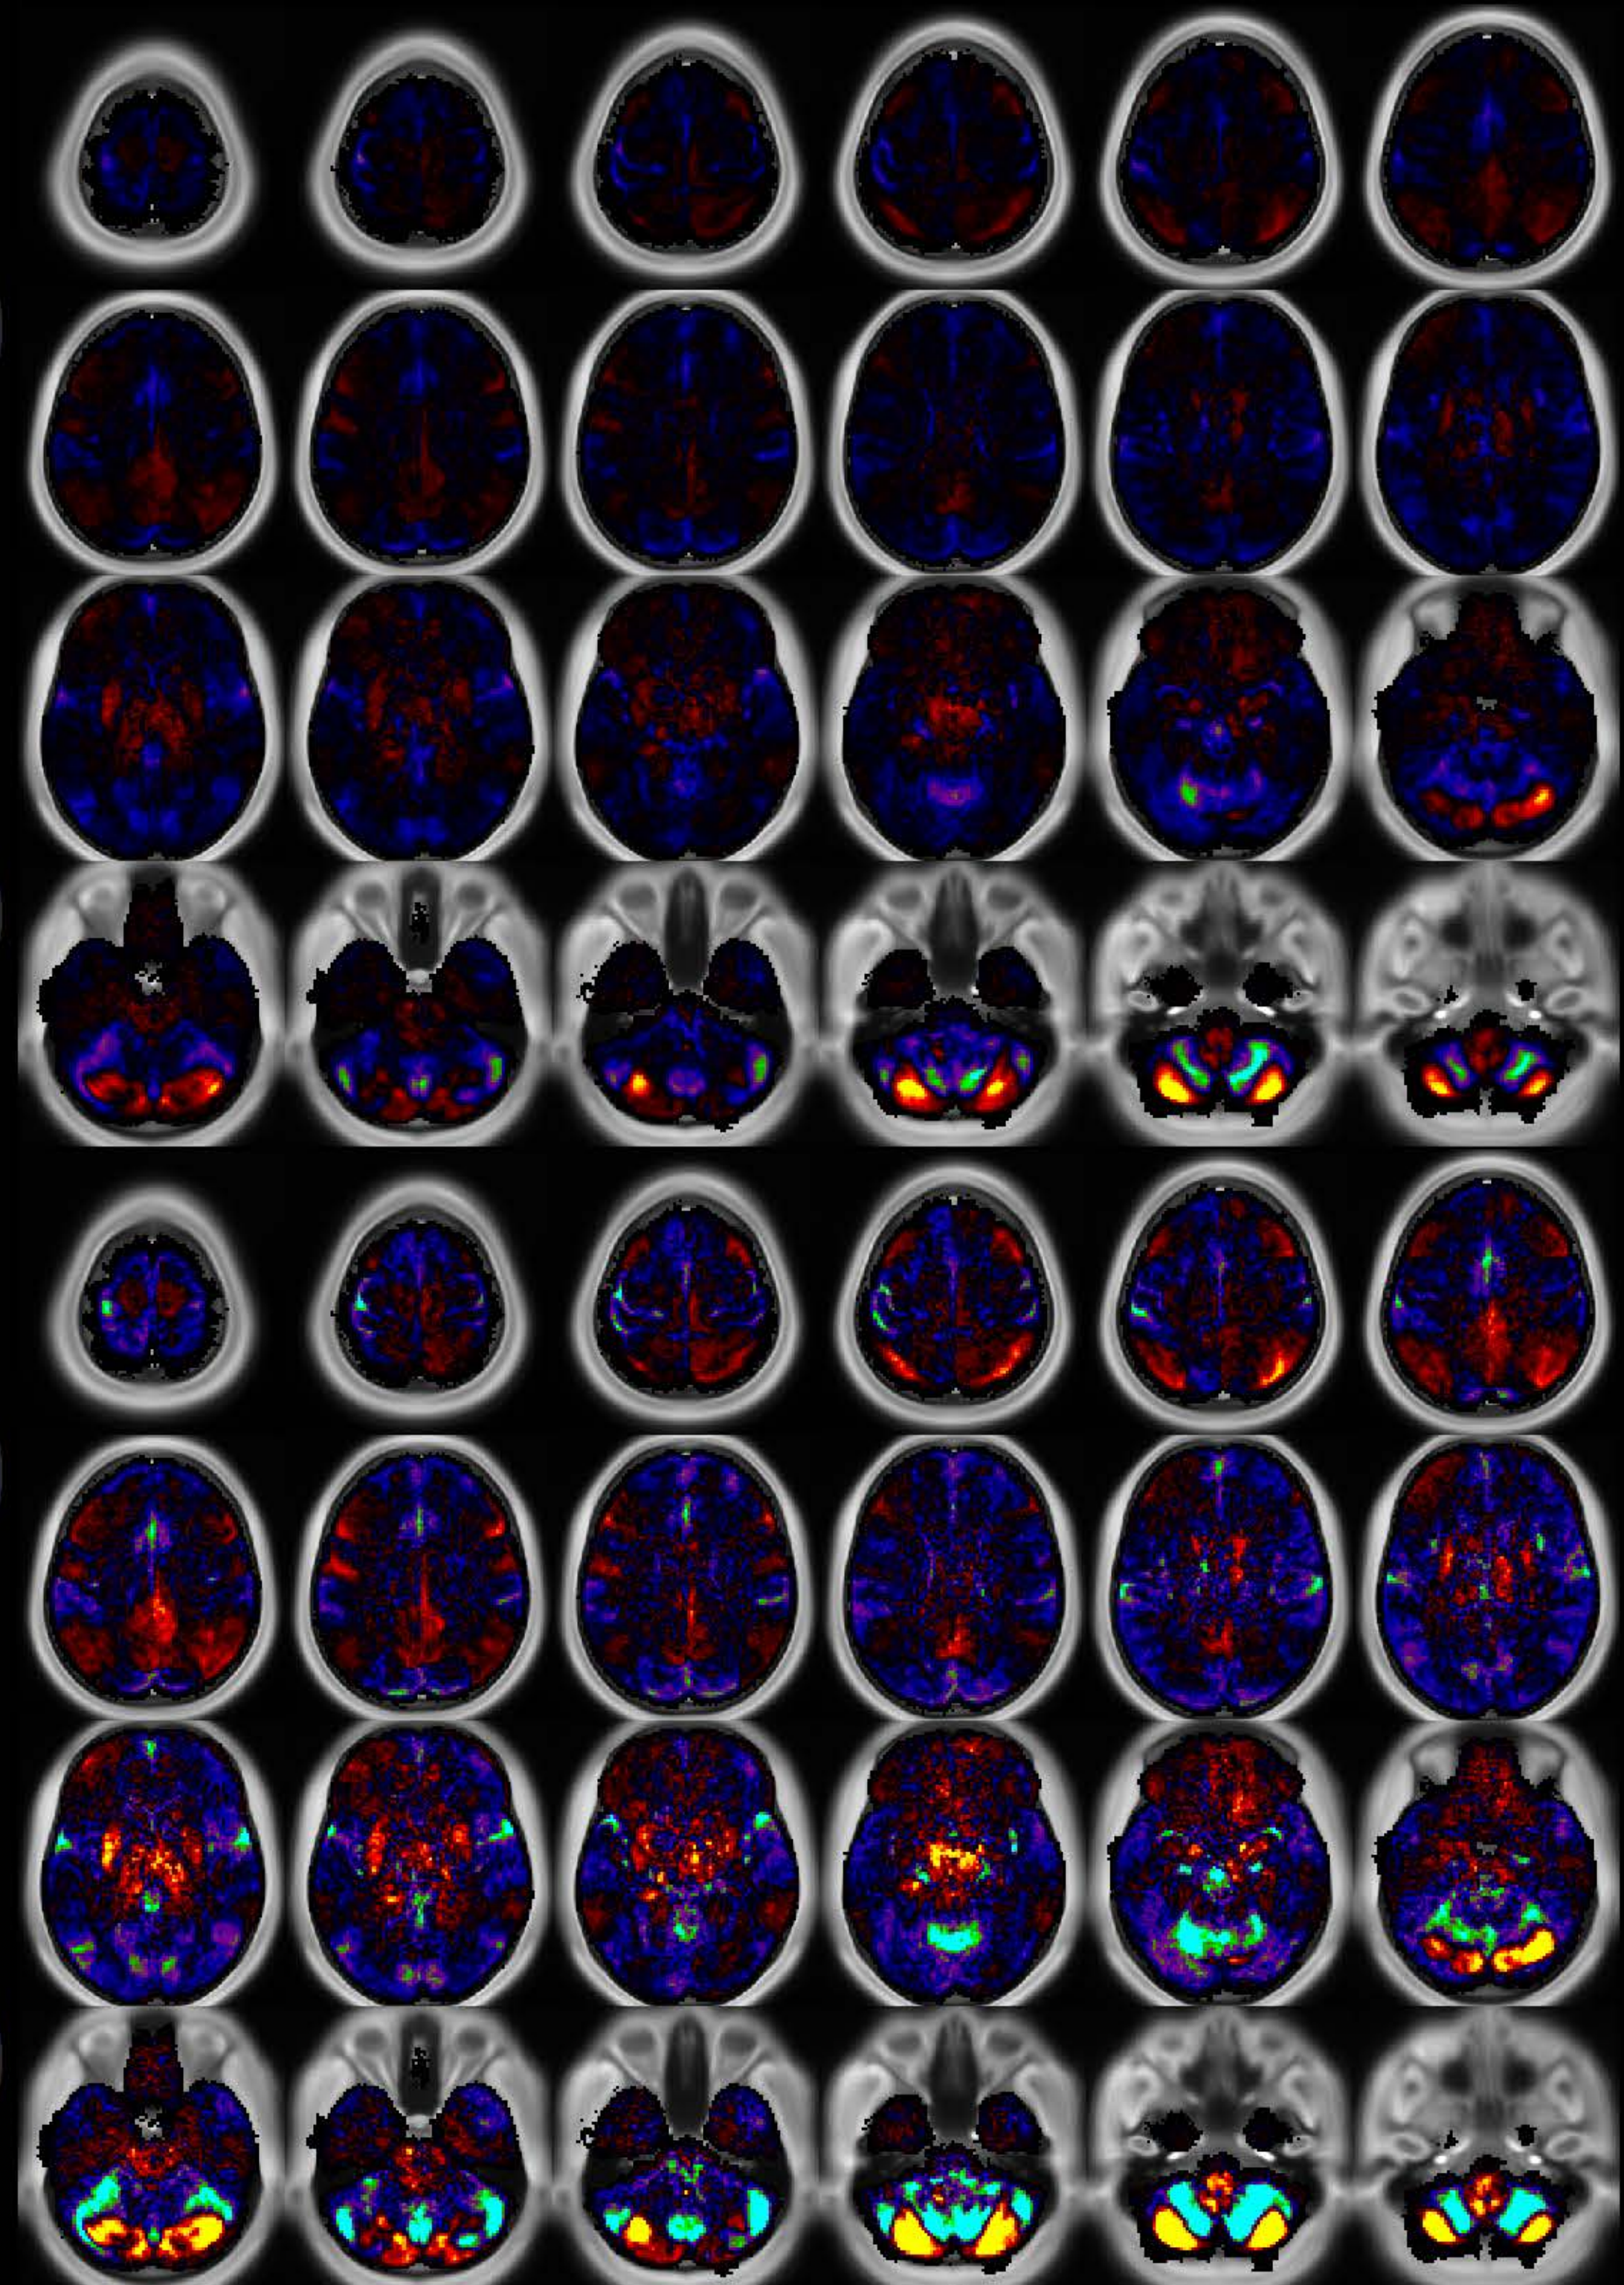

Seconds

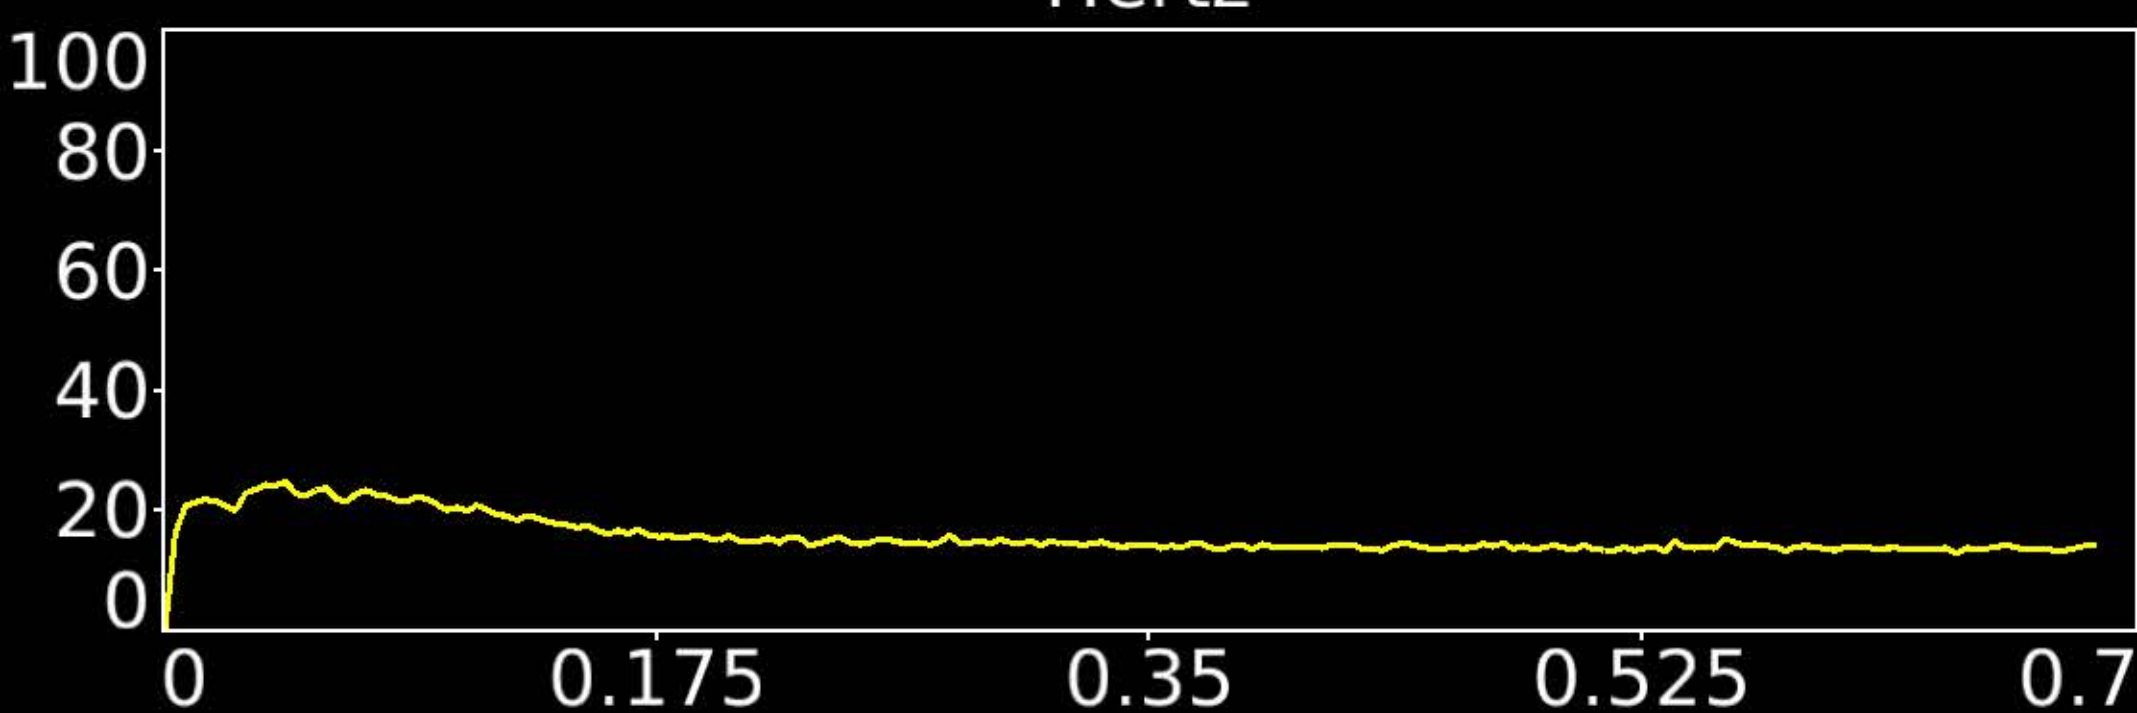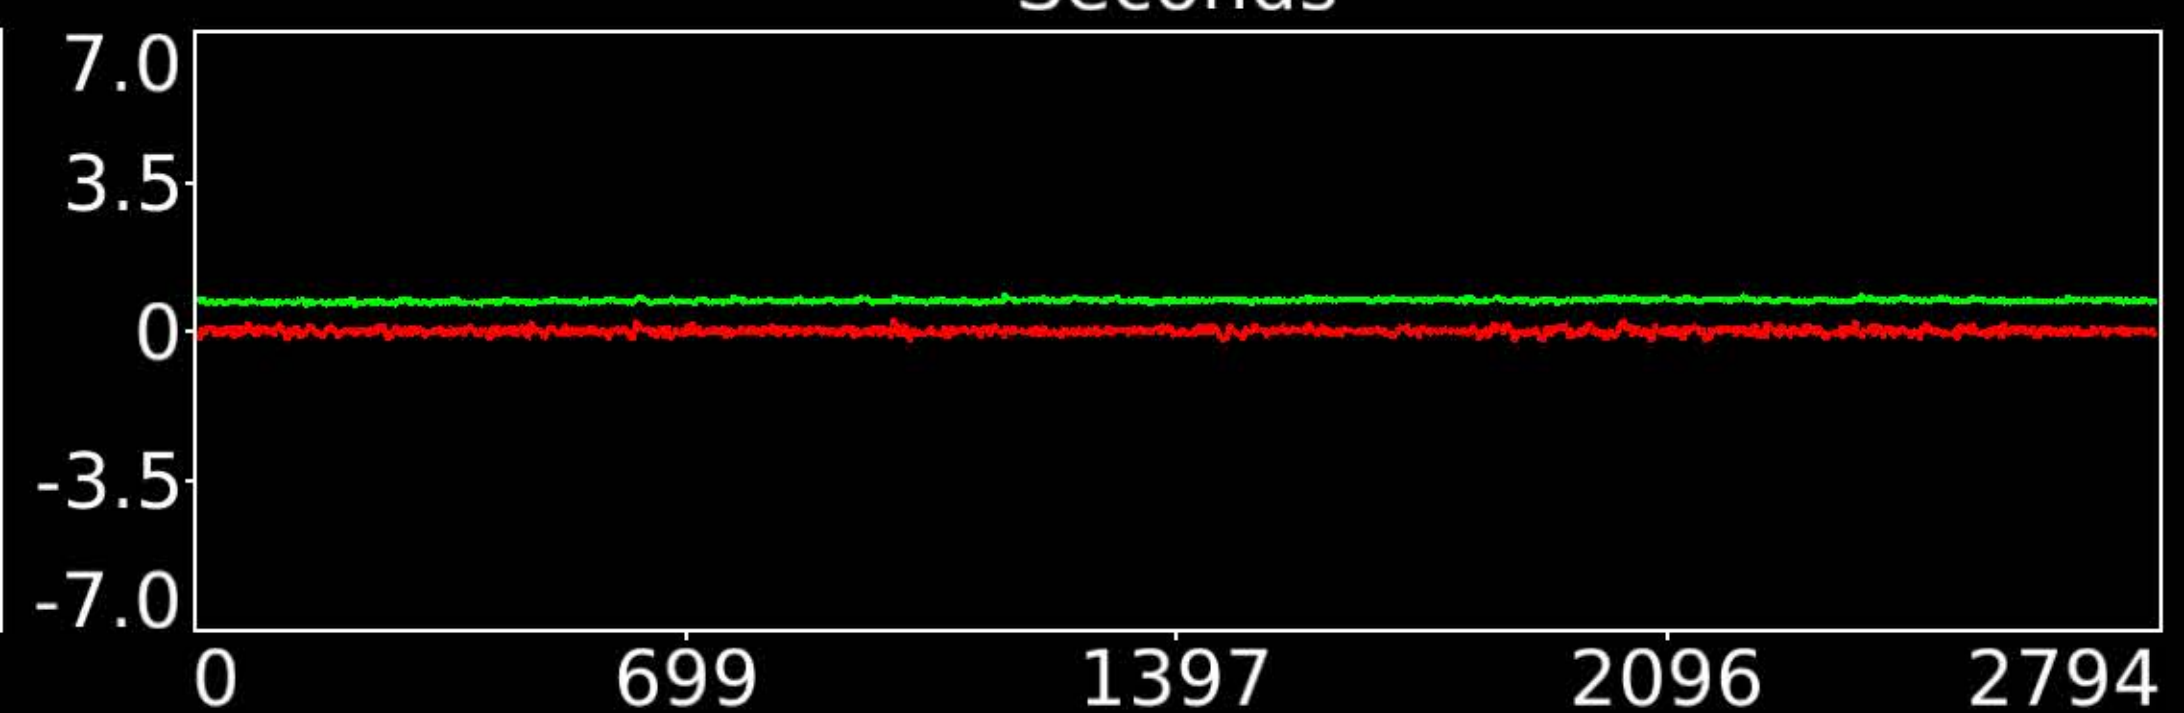

|                          |                            |                            |  |
|--------------------------|----------------------------|----------------------------|--|
| Number & Class: 44 Noise |                            | Name: Cerebellar Unknown   |  |
| RVT Correlated: No       | DVARS Dip Associated: No   | Cross-Subject Variable: No |  |
| Single Subject: Yes      | % Variance Explained: 0.96 | Globality Index: 0.39      |  |
| Task Component: No       | Rest Component: No         | Task Modulated: No         |  |

Rationale: Controversial: Clusters with other noise components in subject-wise amplitude correlations; spatial map does not match known areas or RSNs



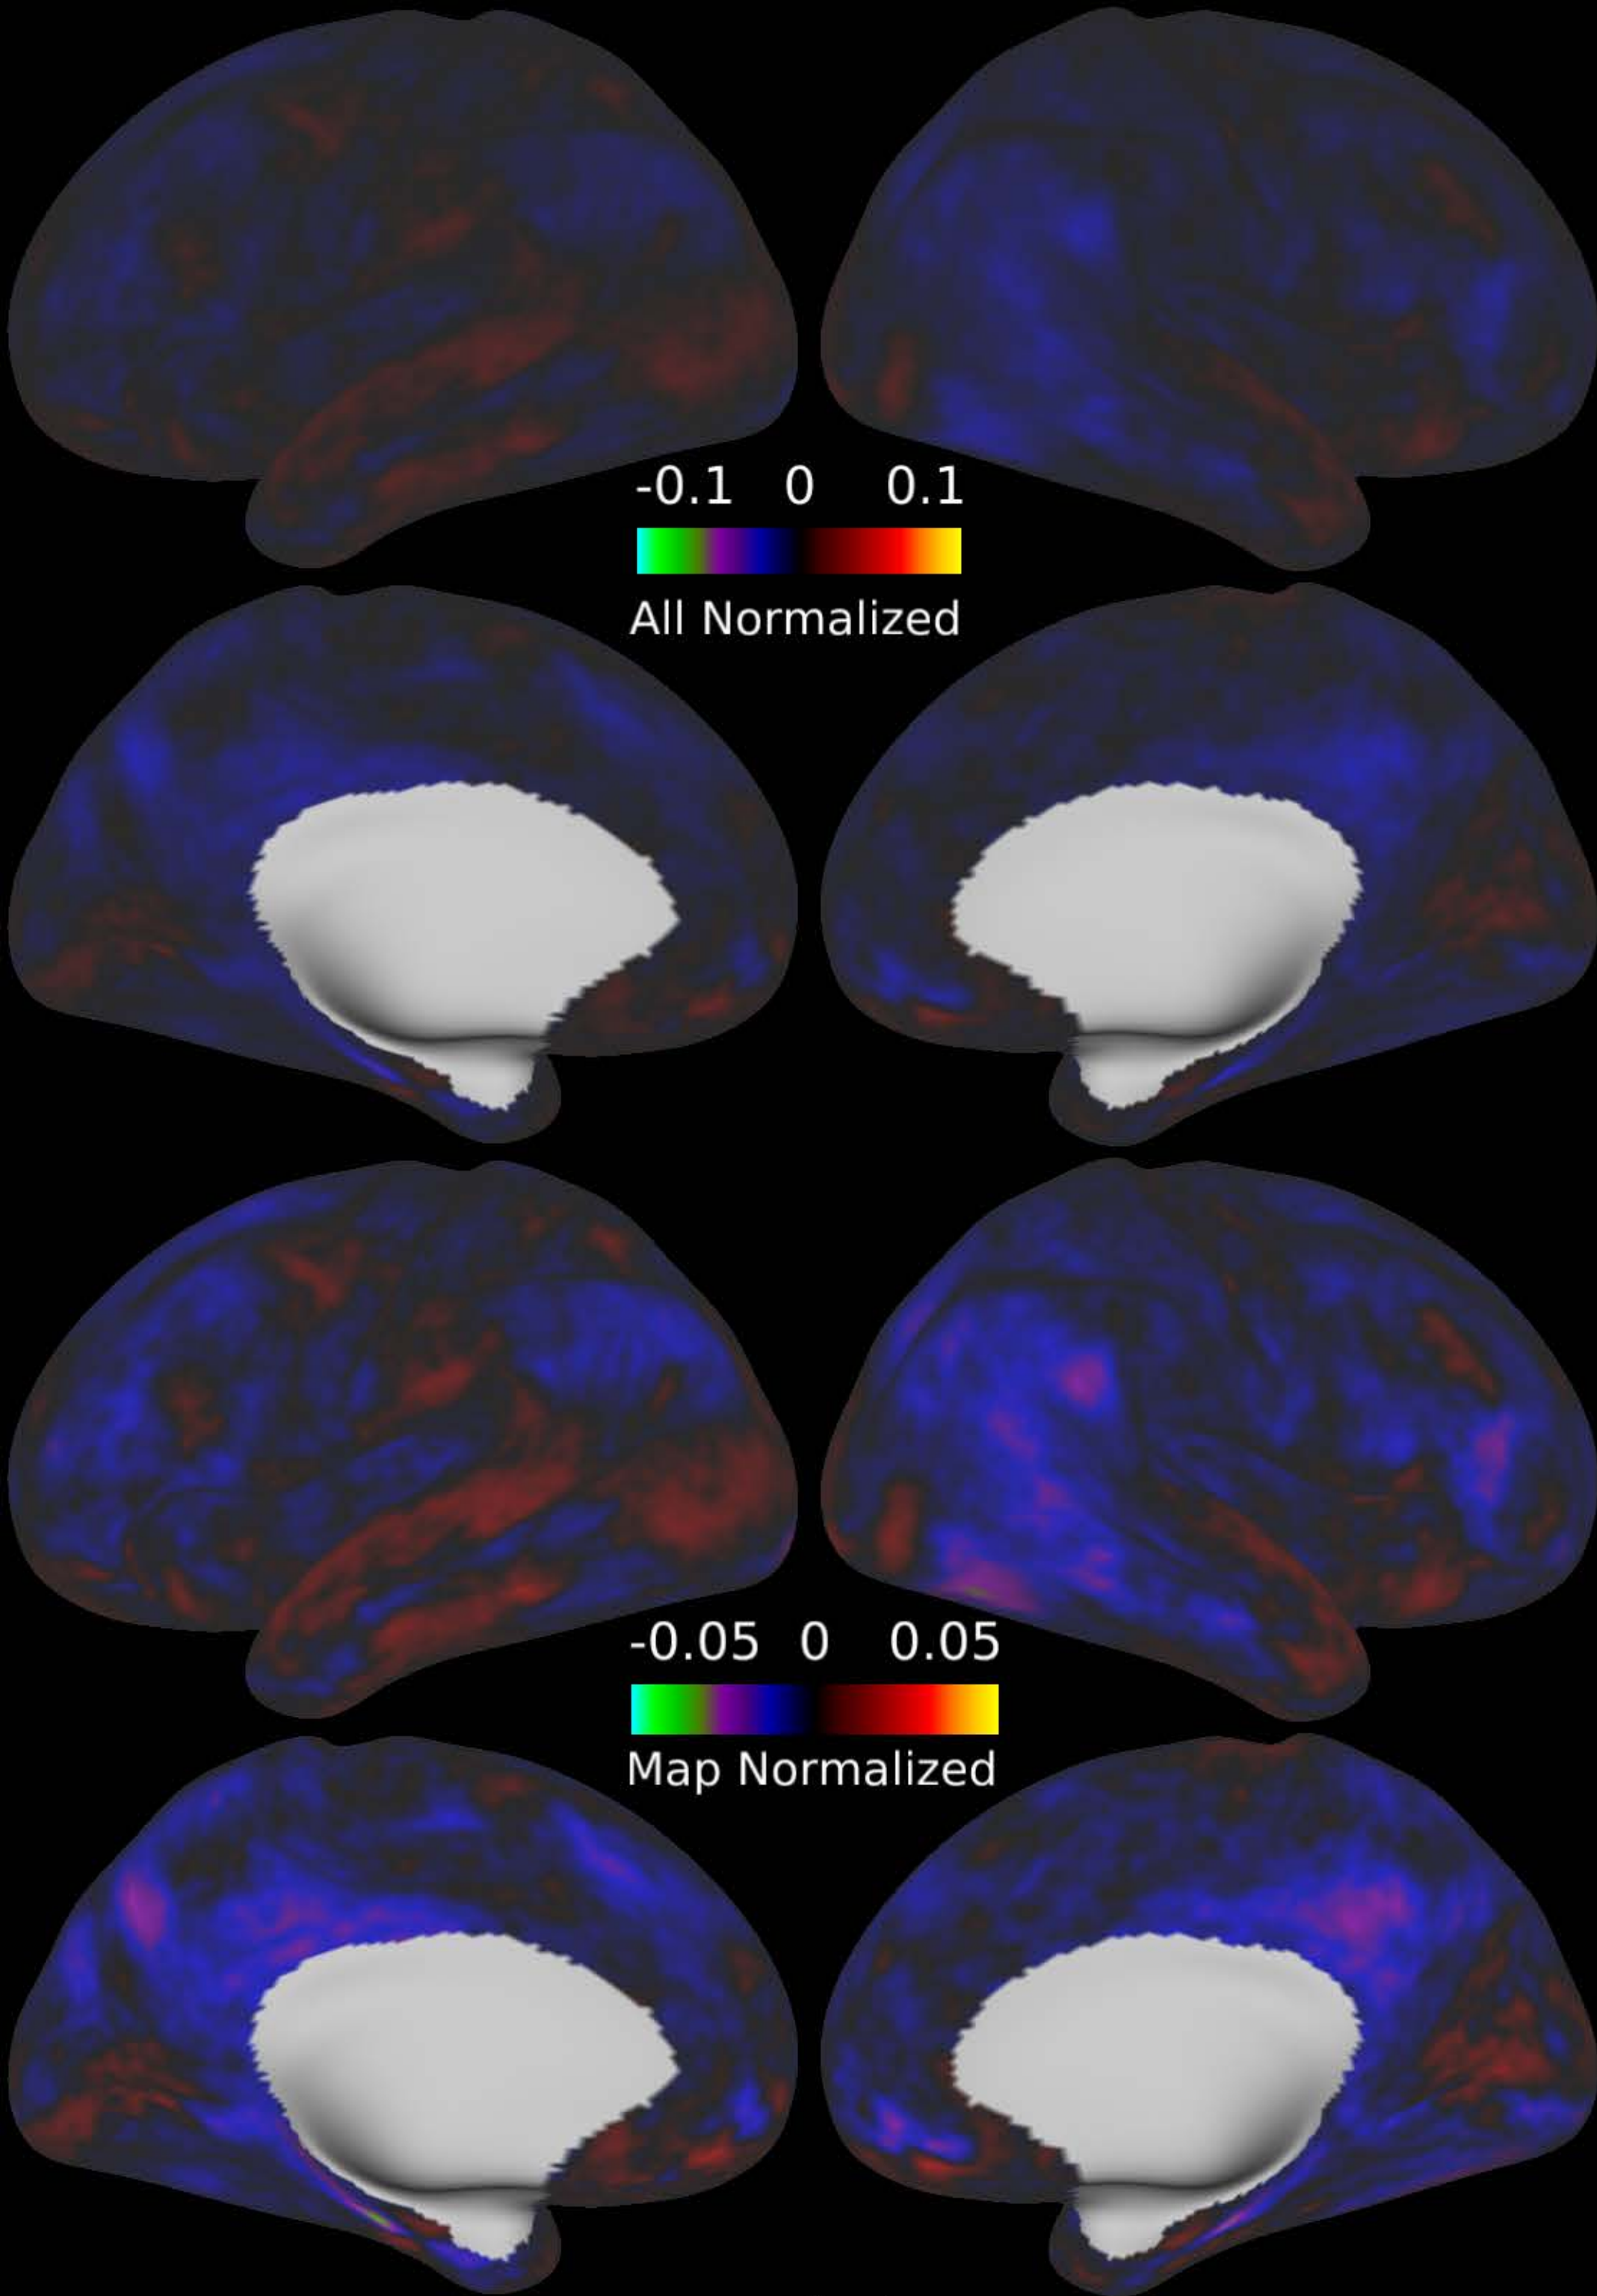

Hertz

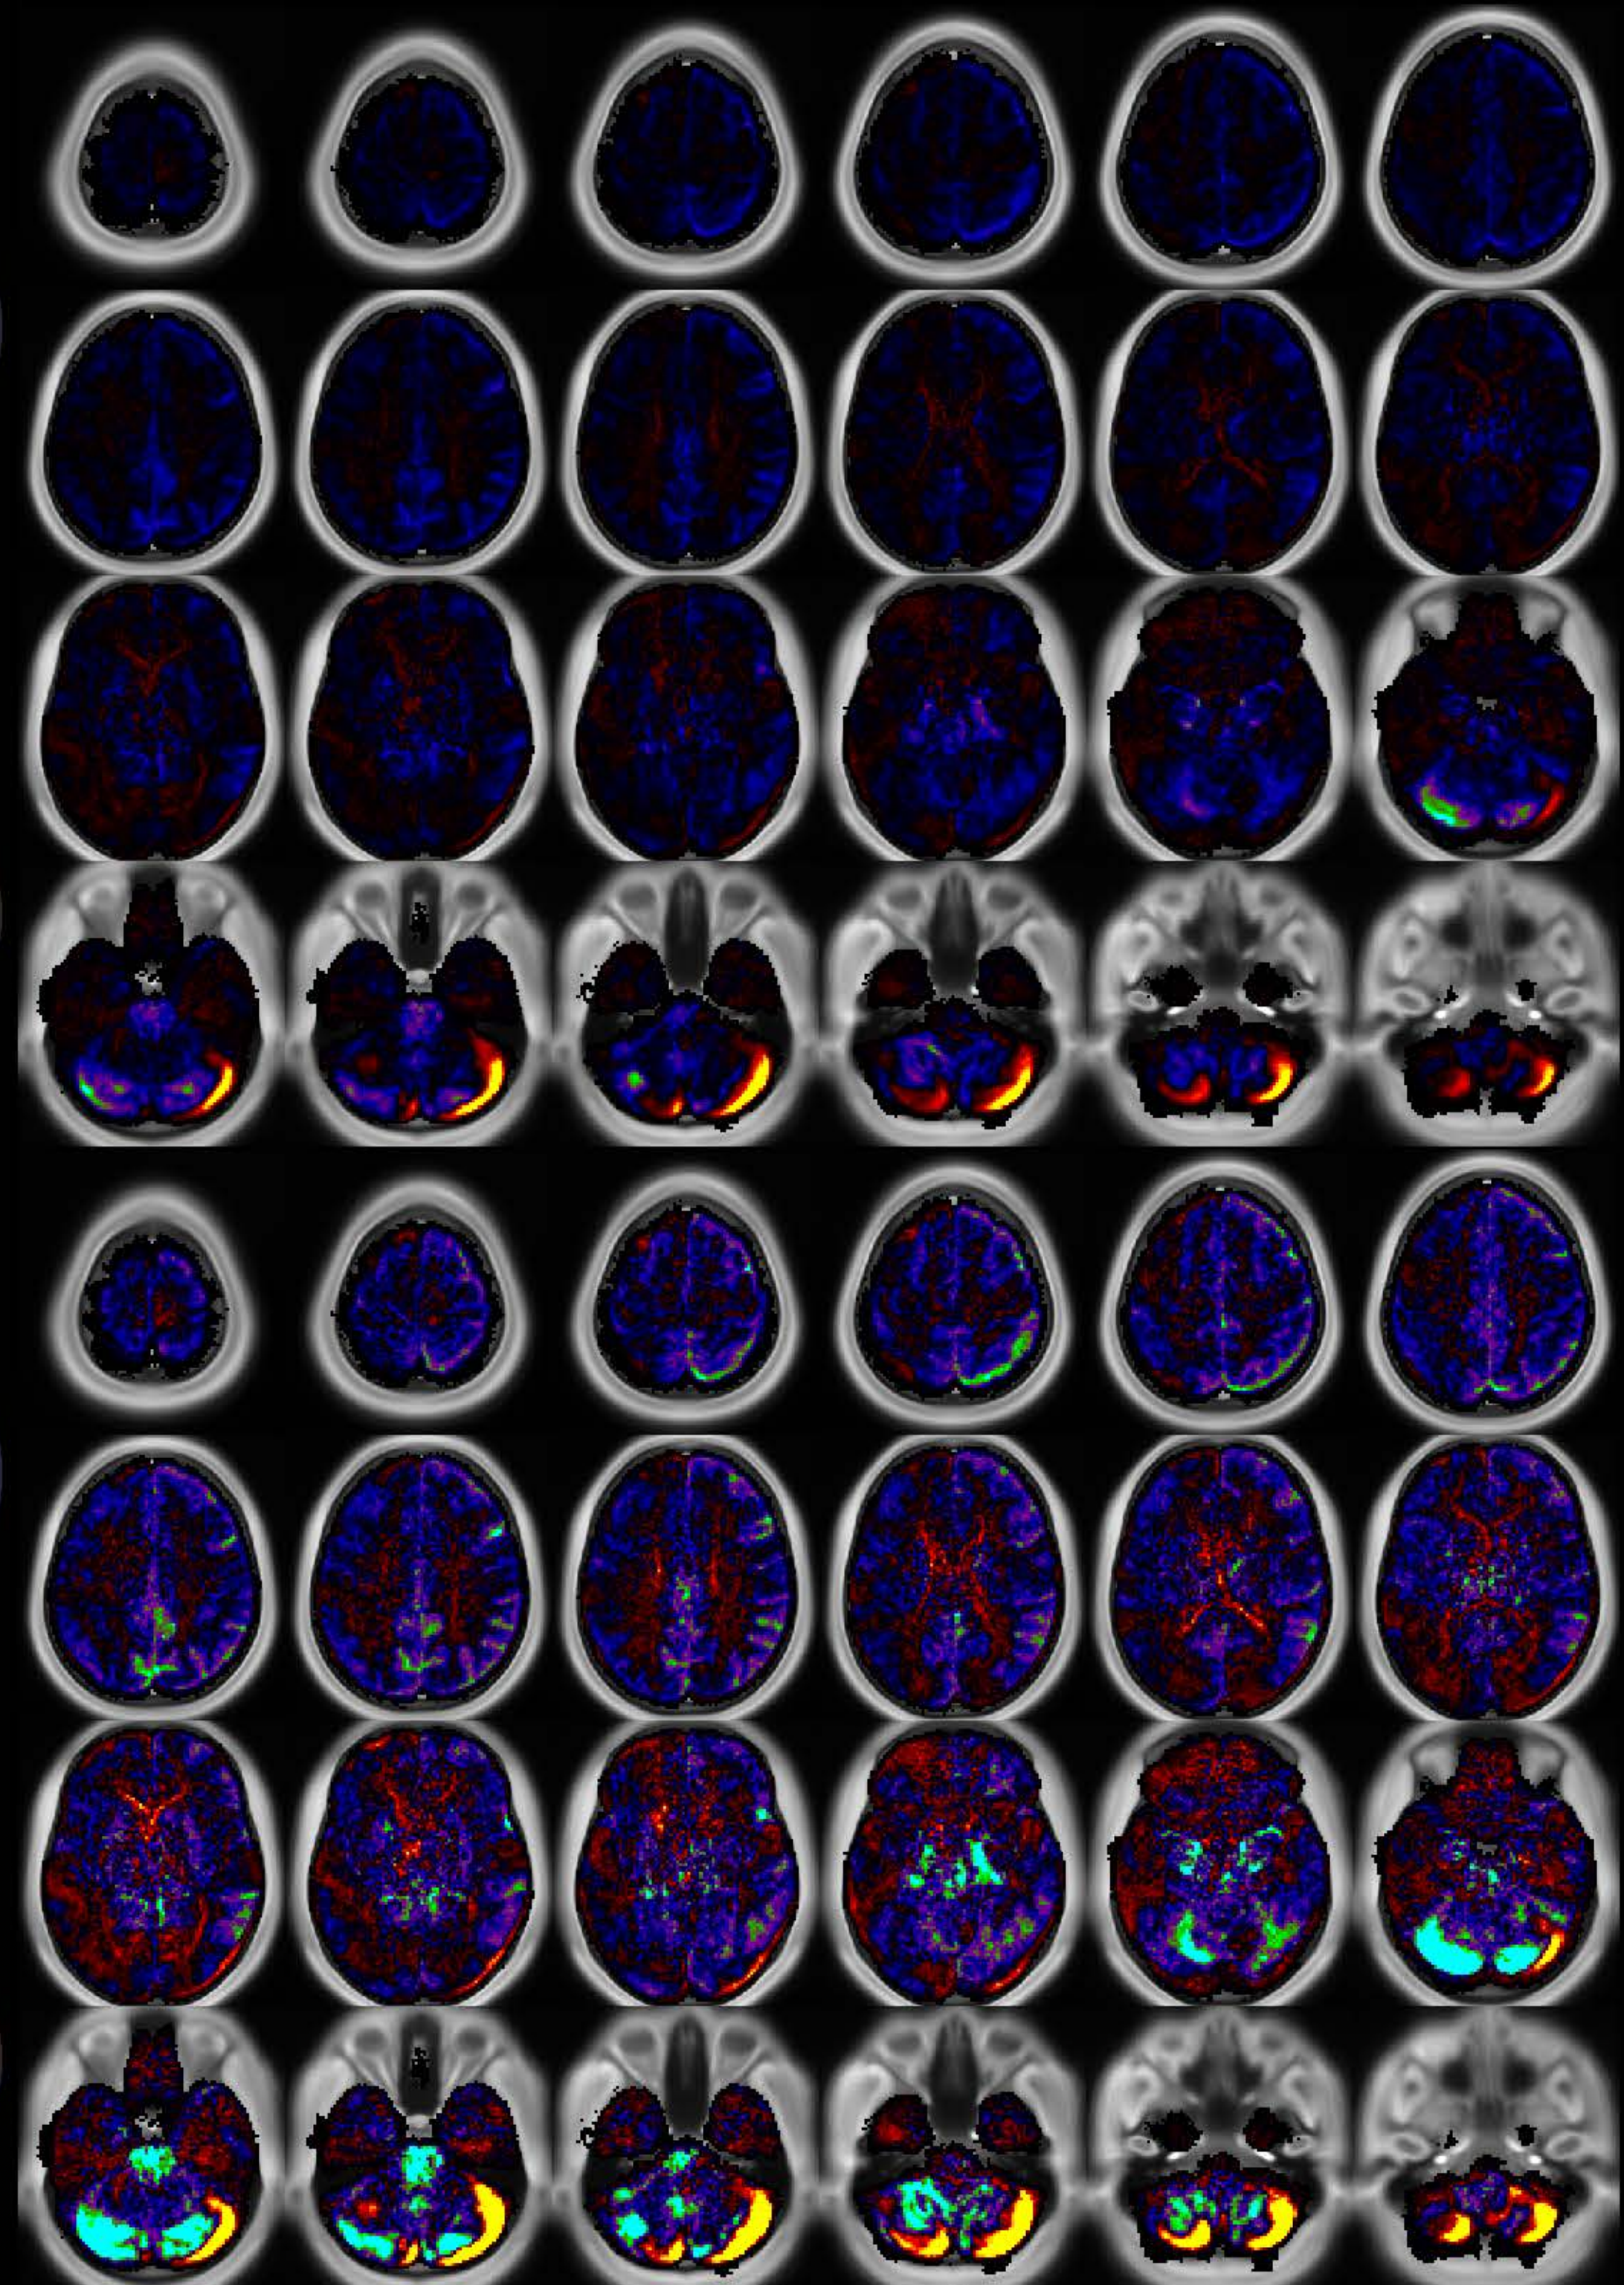

Seconds

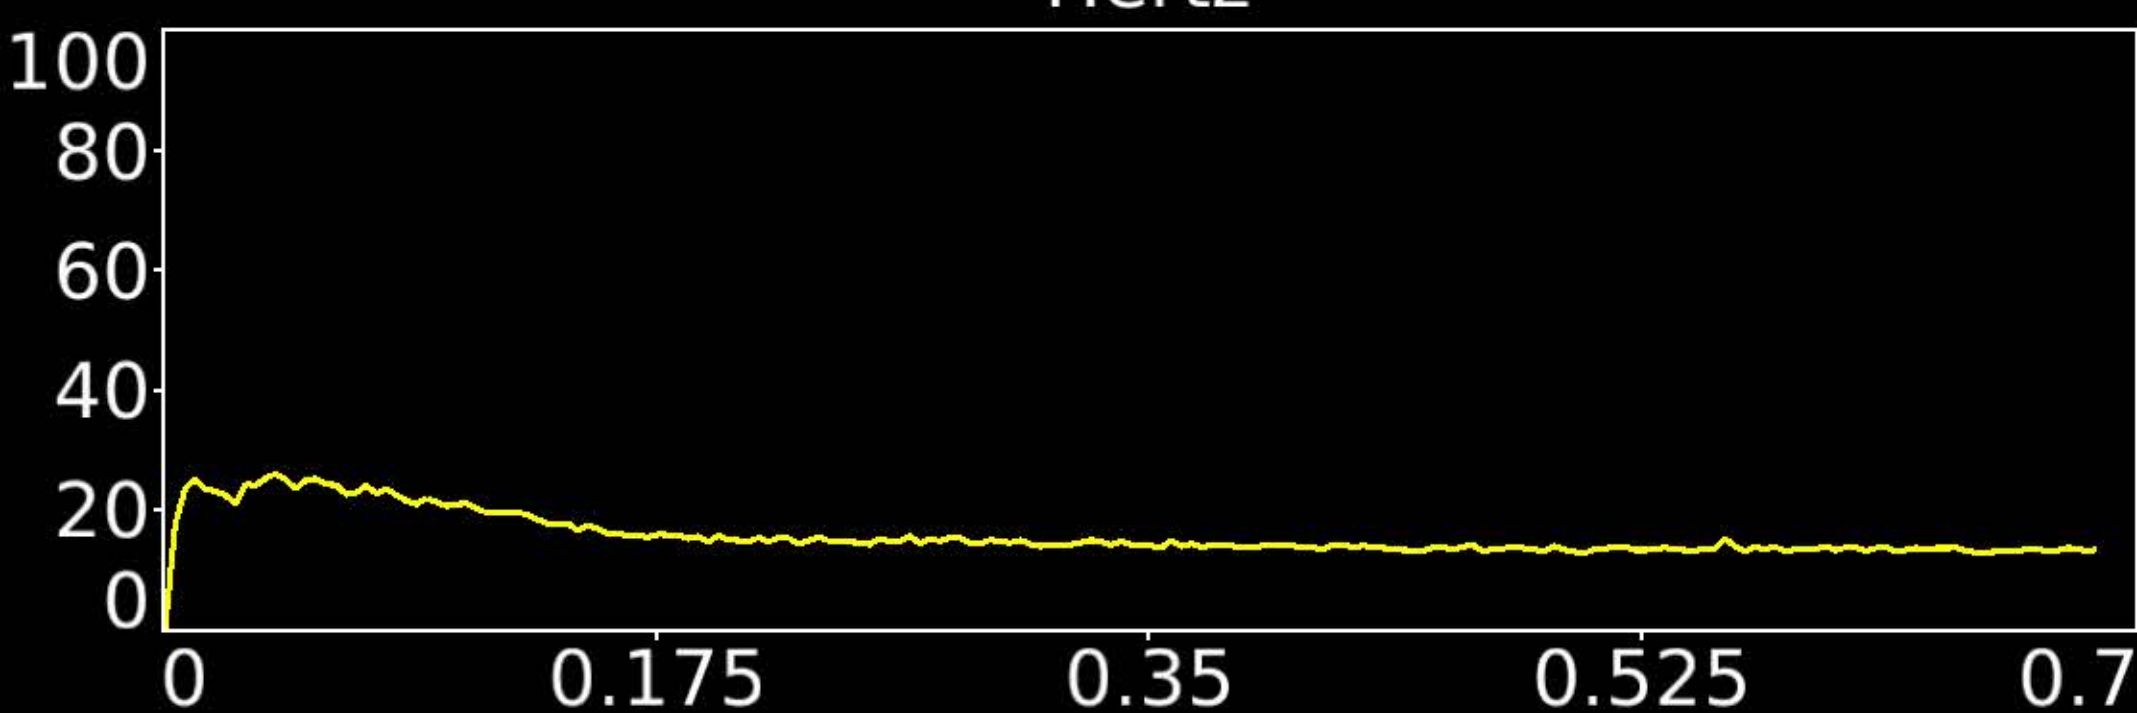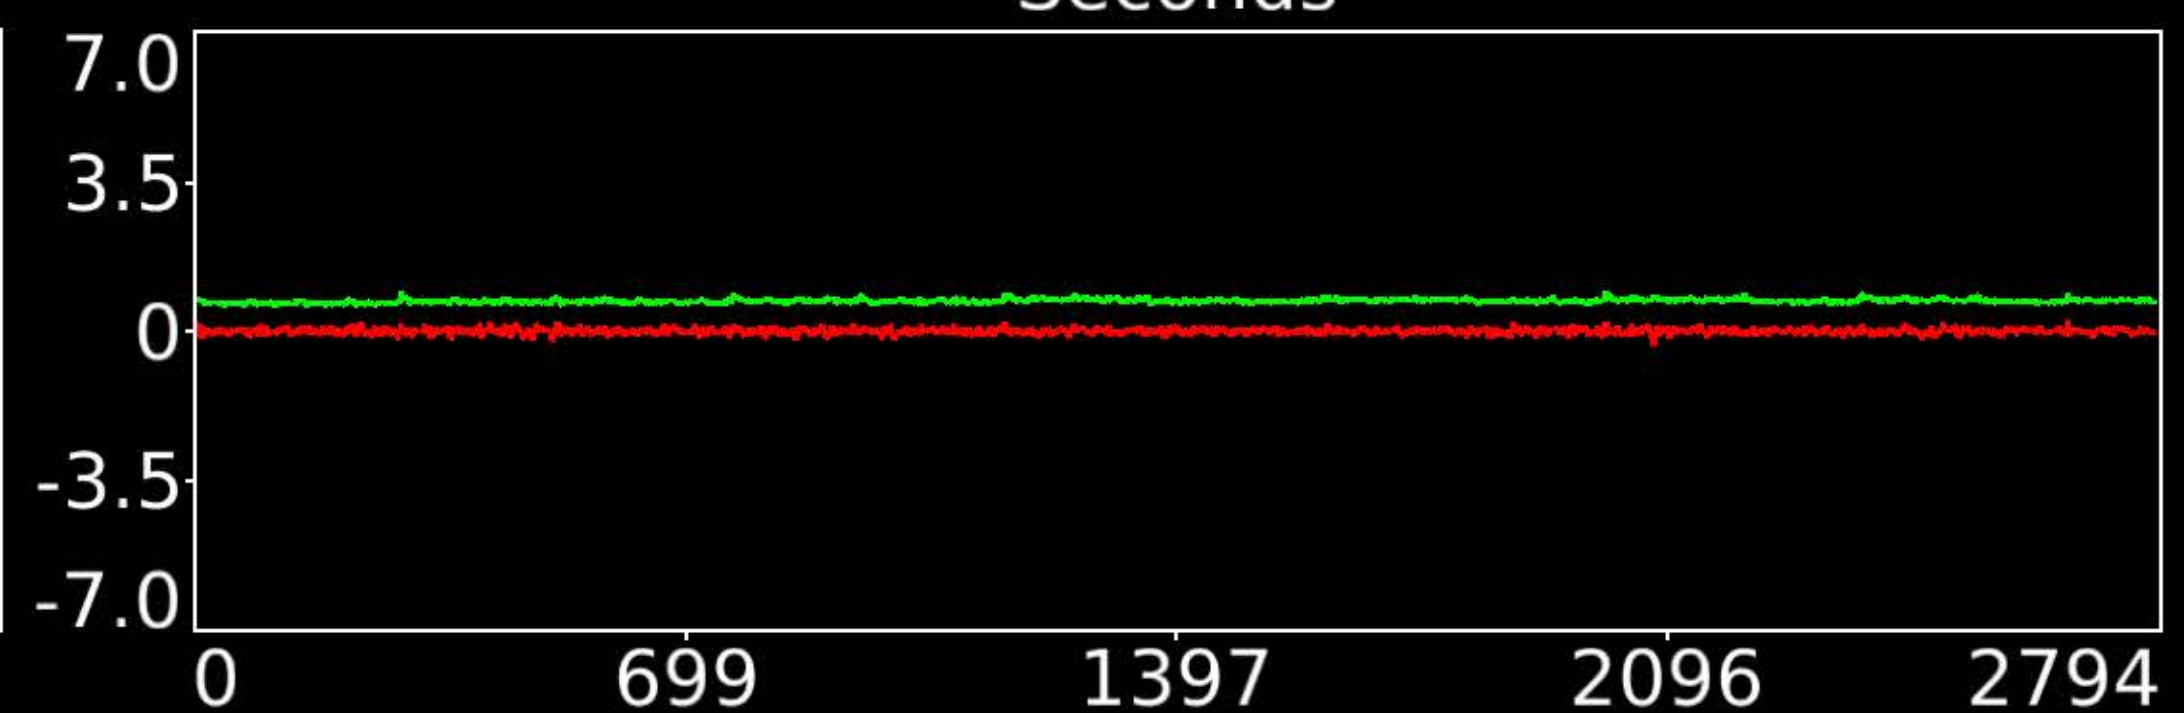

|                          |                            |                                          |  |
|--------------------------|----------------------------|------------------------------------------|--|
| Number & Class: 45 Noise |                            | Name: Cerebellar Movement Artifact Right |  |
| RVT Correlated: No       | DVARS Dip Associated: Yes  | Cross-Subject Variable: No               |  |
| Single Subject: Yes      | % Variance Explained: 0.96 | Globality Index: 1.45                    |  |
| Task Component: 47       | Rest Component: No         | Task Modulated: No                       |  |

Rationale: Cerebellar edge motion component with high correlation to DVARS dipoles; looks like movement regressor beta map (derivative of X translation)



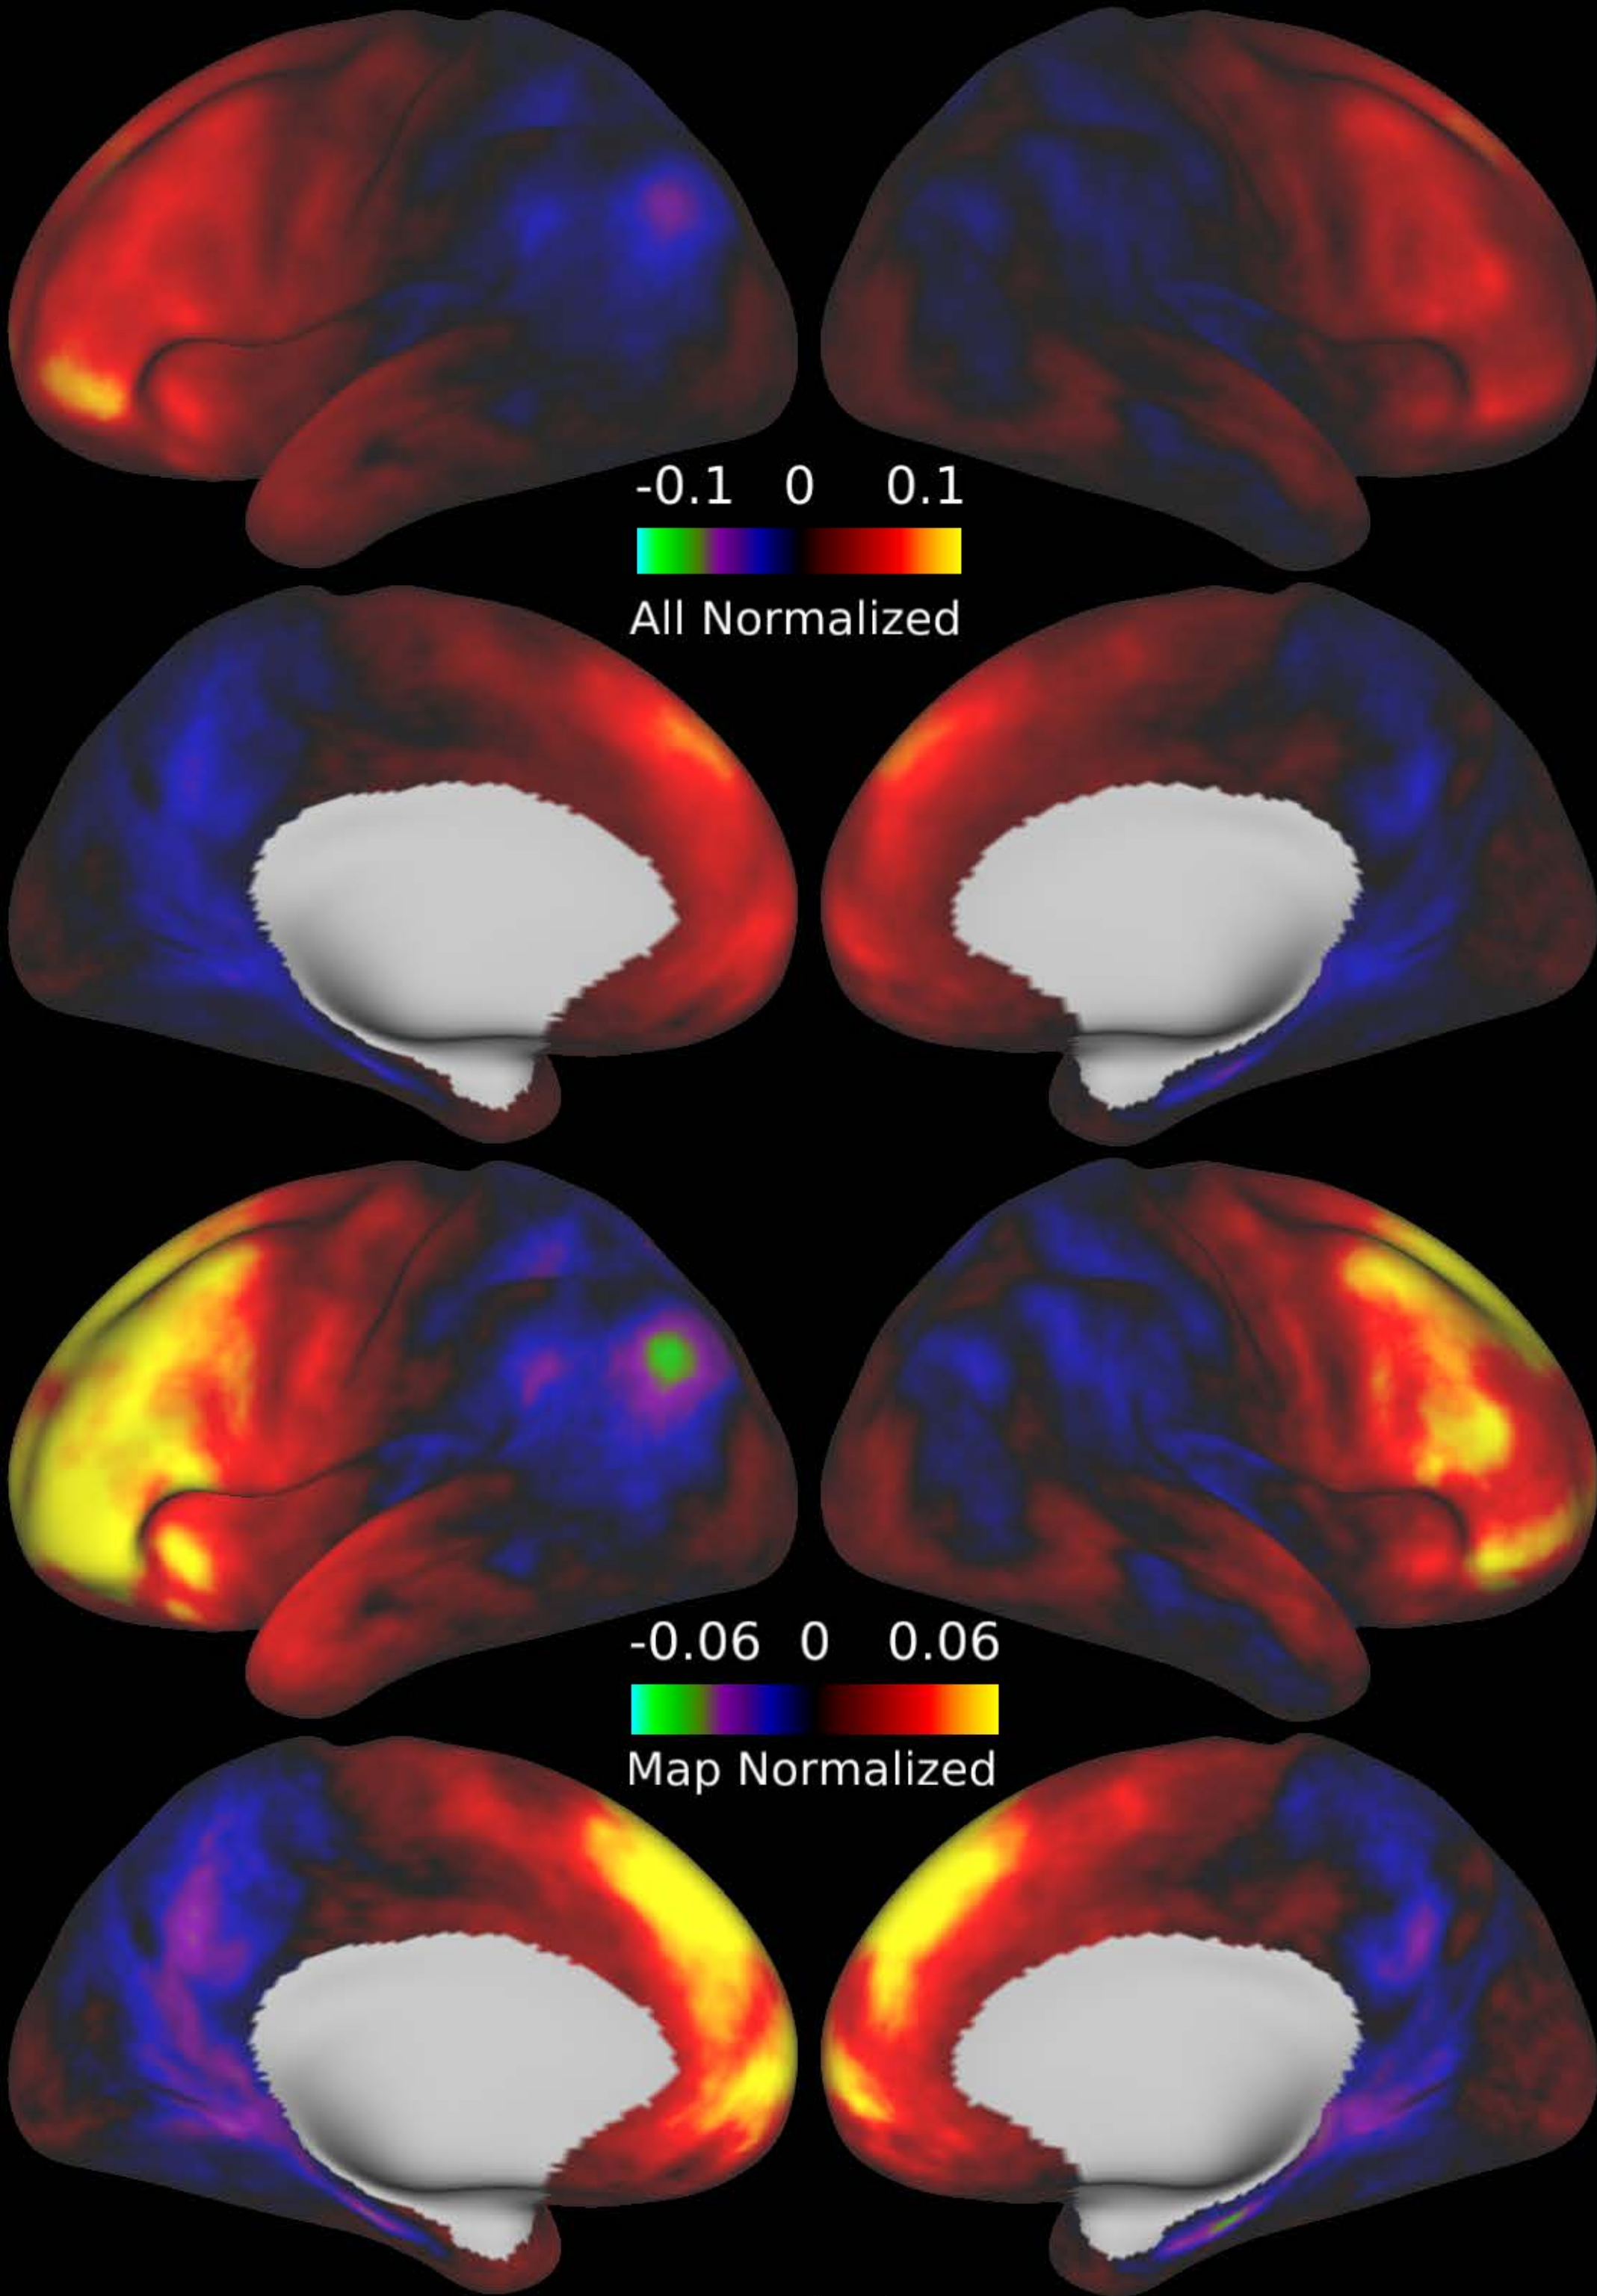

Hertz

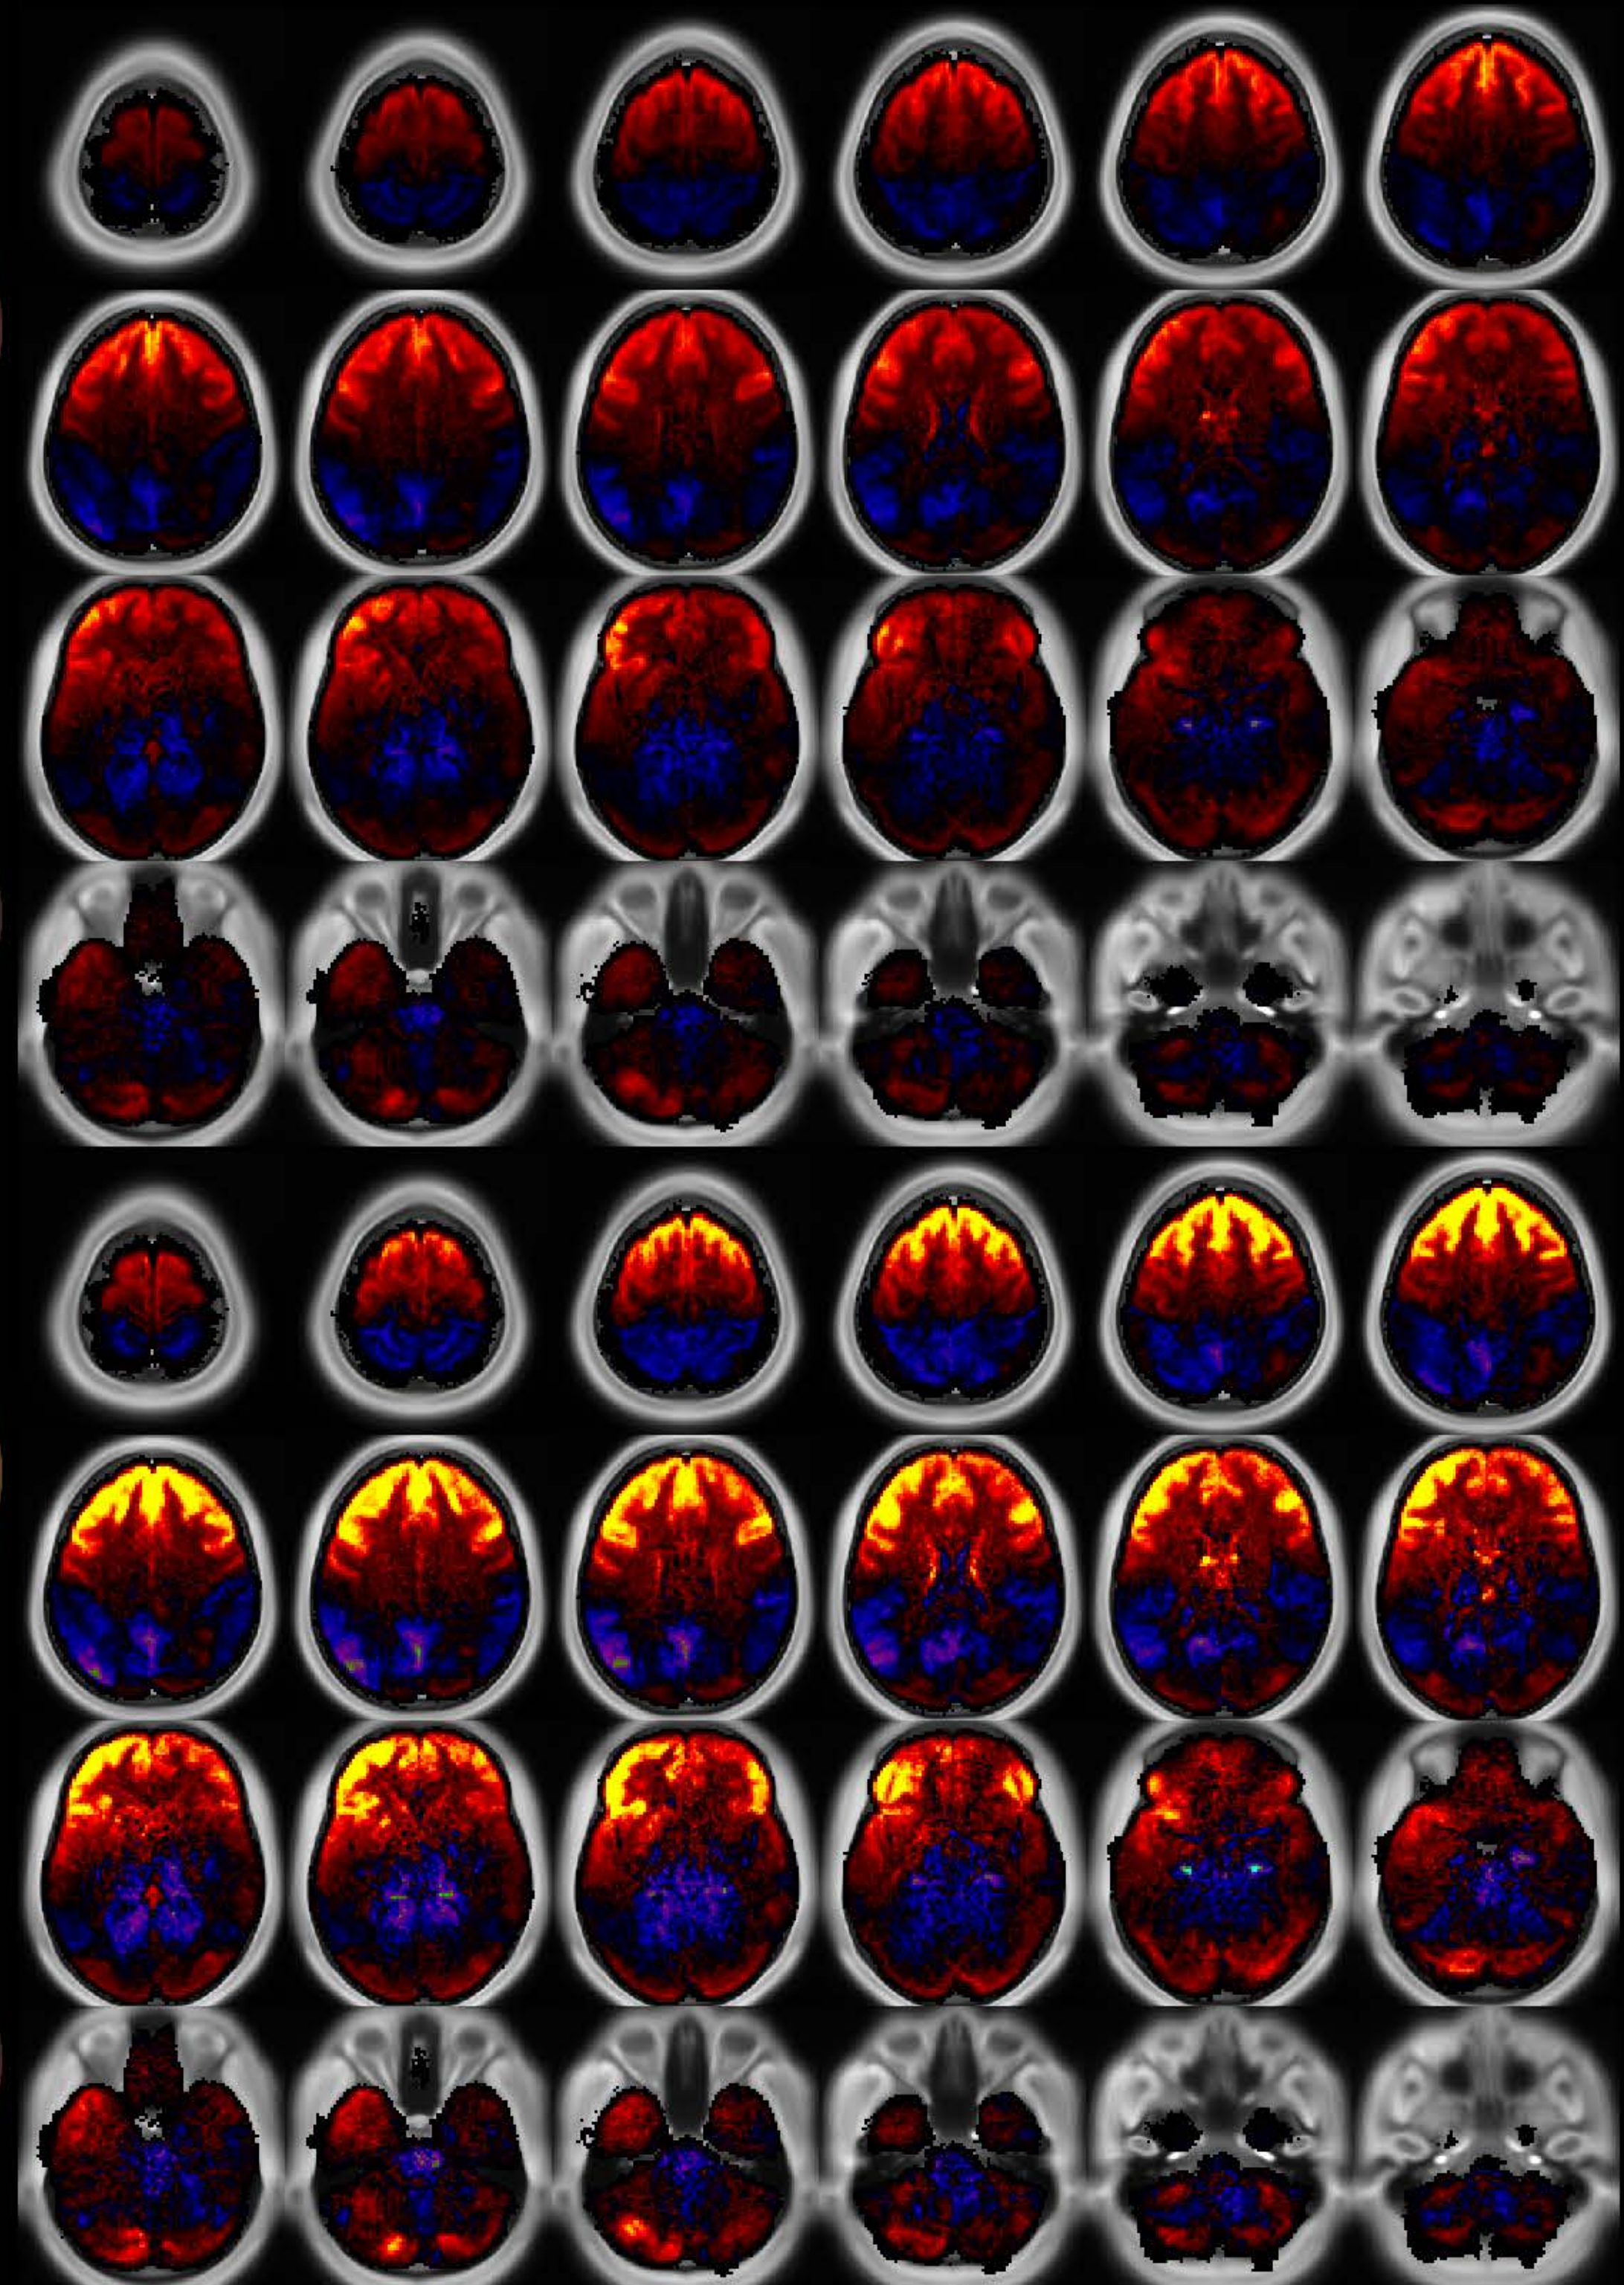

Seconds

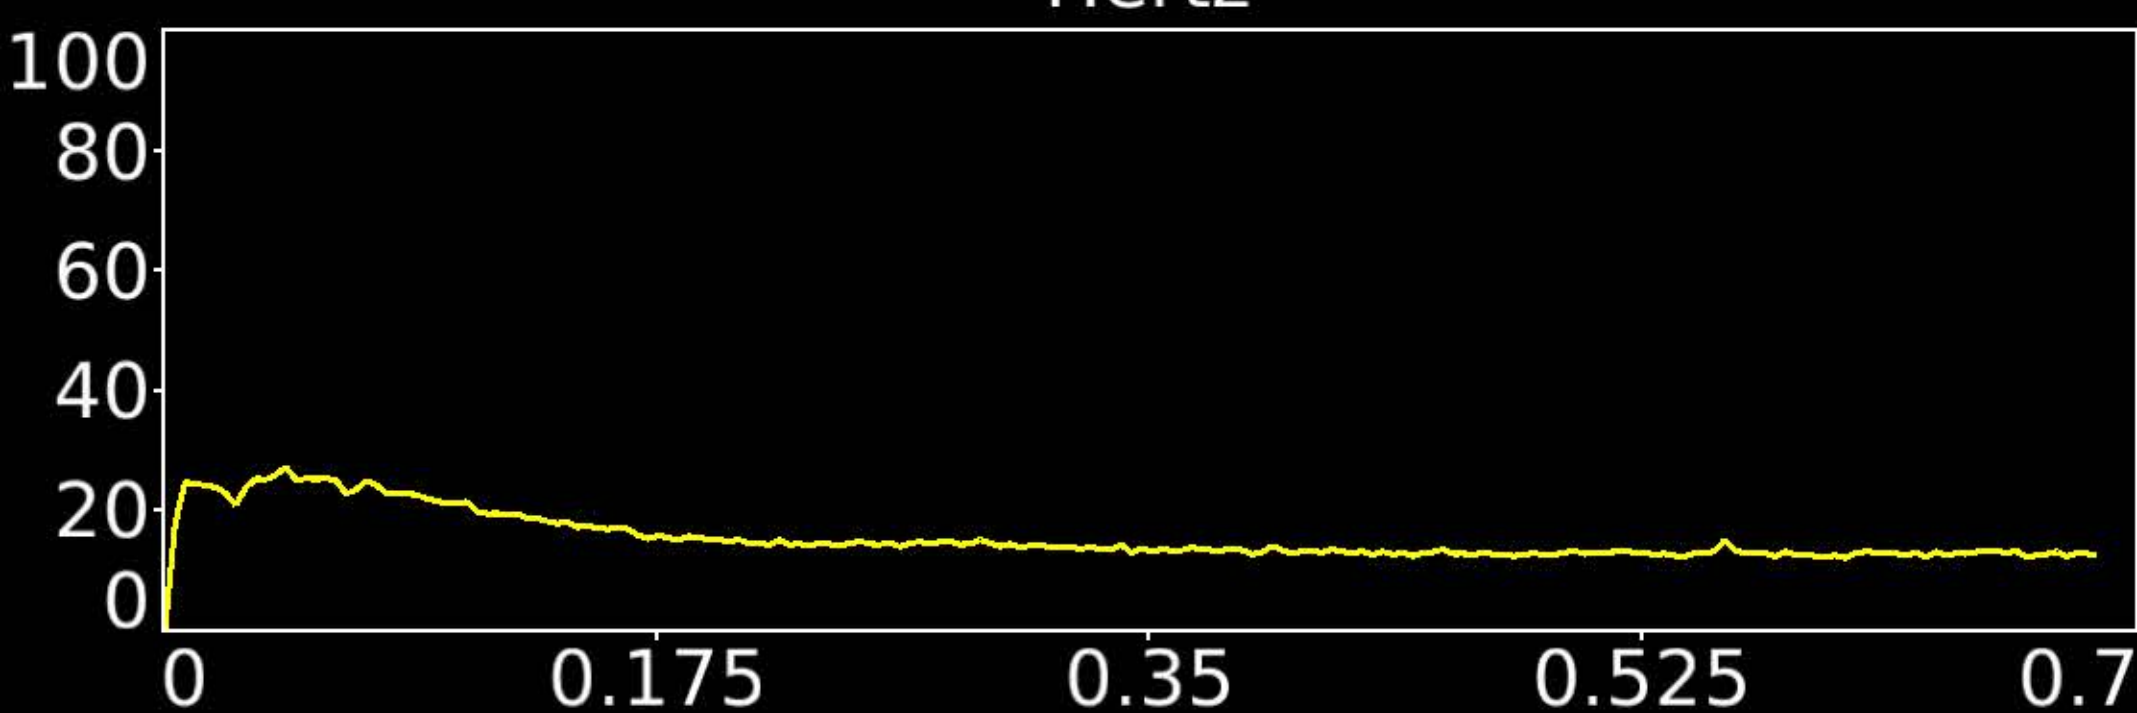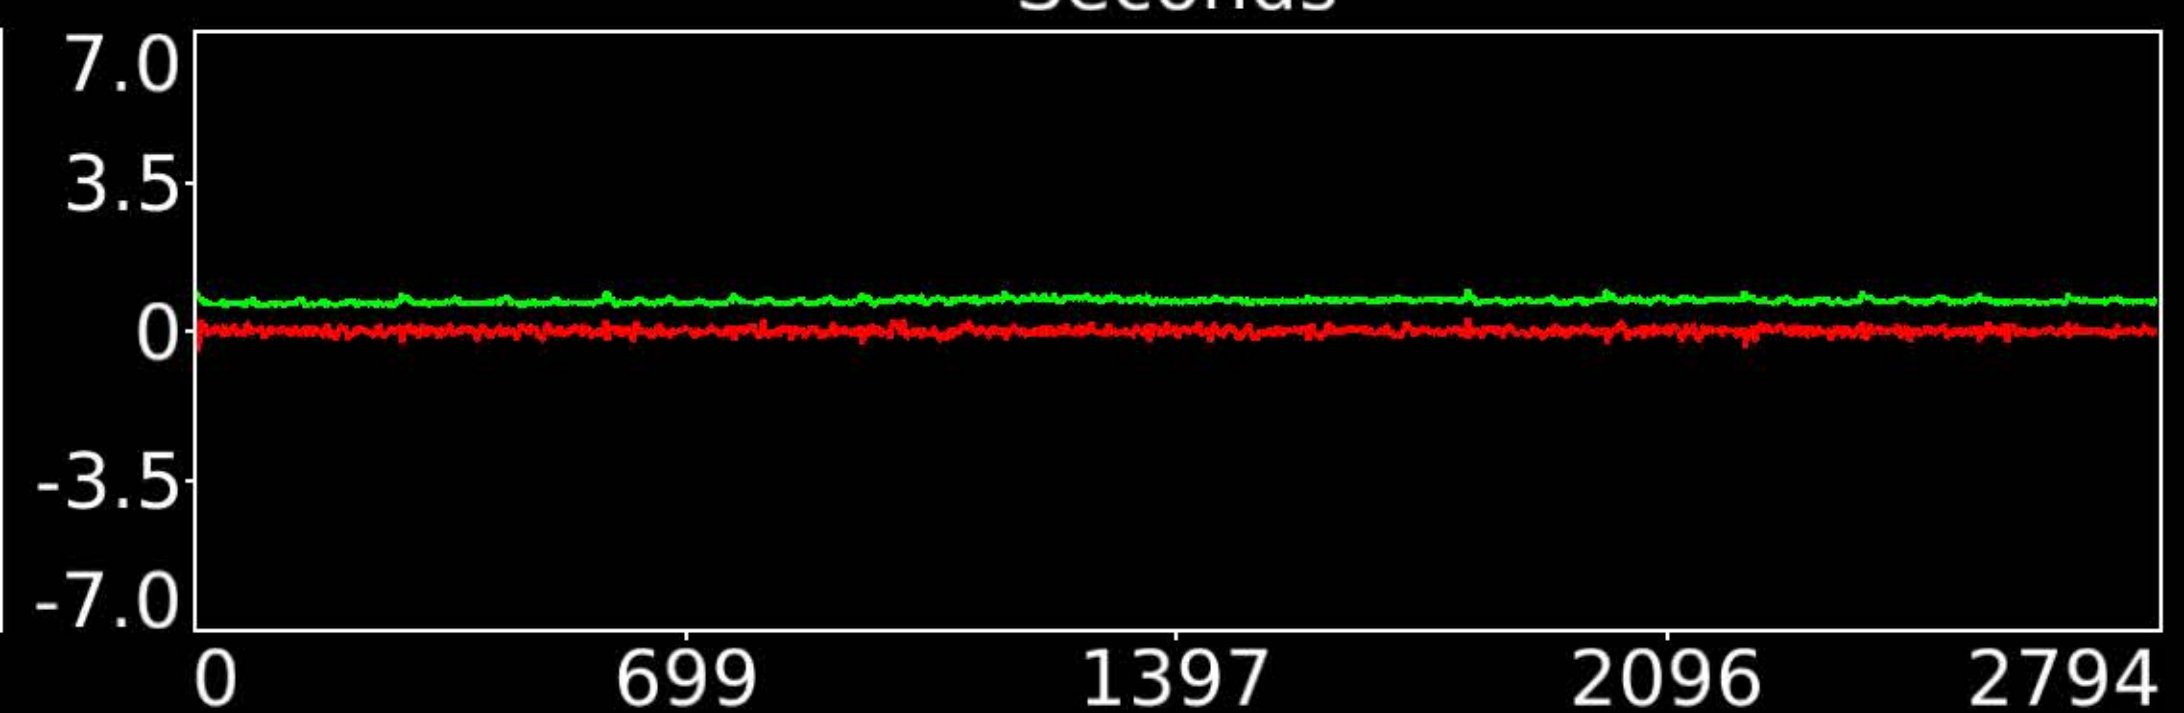

|                                                                                                           |                            |                            |  |
|-----------------------------------------------------------------------------------------------------------|----------------------------|----------------------------|--|
| Number & Class: 46 Noise                                                                                  |                            | Name: Coil or Movement     |  |
| RVT Correlated: No                                                                                        | DVARS Dip Associated: Yes  | Cross-Subject Variable: No |  |
| Single Subject: No                                                                                        | % Variance Explained: 0.95 | Globality Index: 0.68      |  |
| Task Component: 60                                                                                        | Rest Component: No         | Task Modulated: No         |  |
| Rationale: Substantial white matter signal; associated with DVARS dips; perhaps related to coil or motion |                            |                            |  |



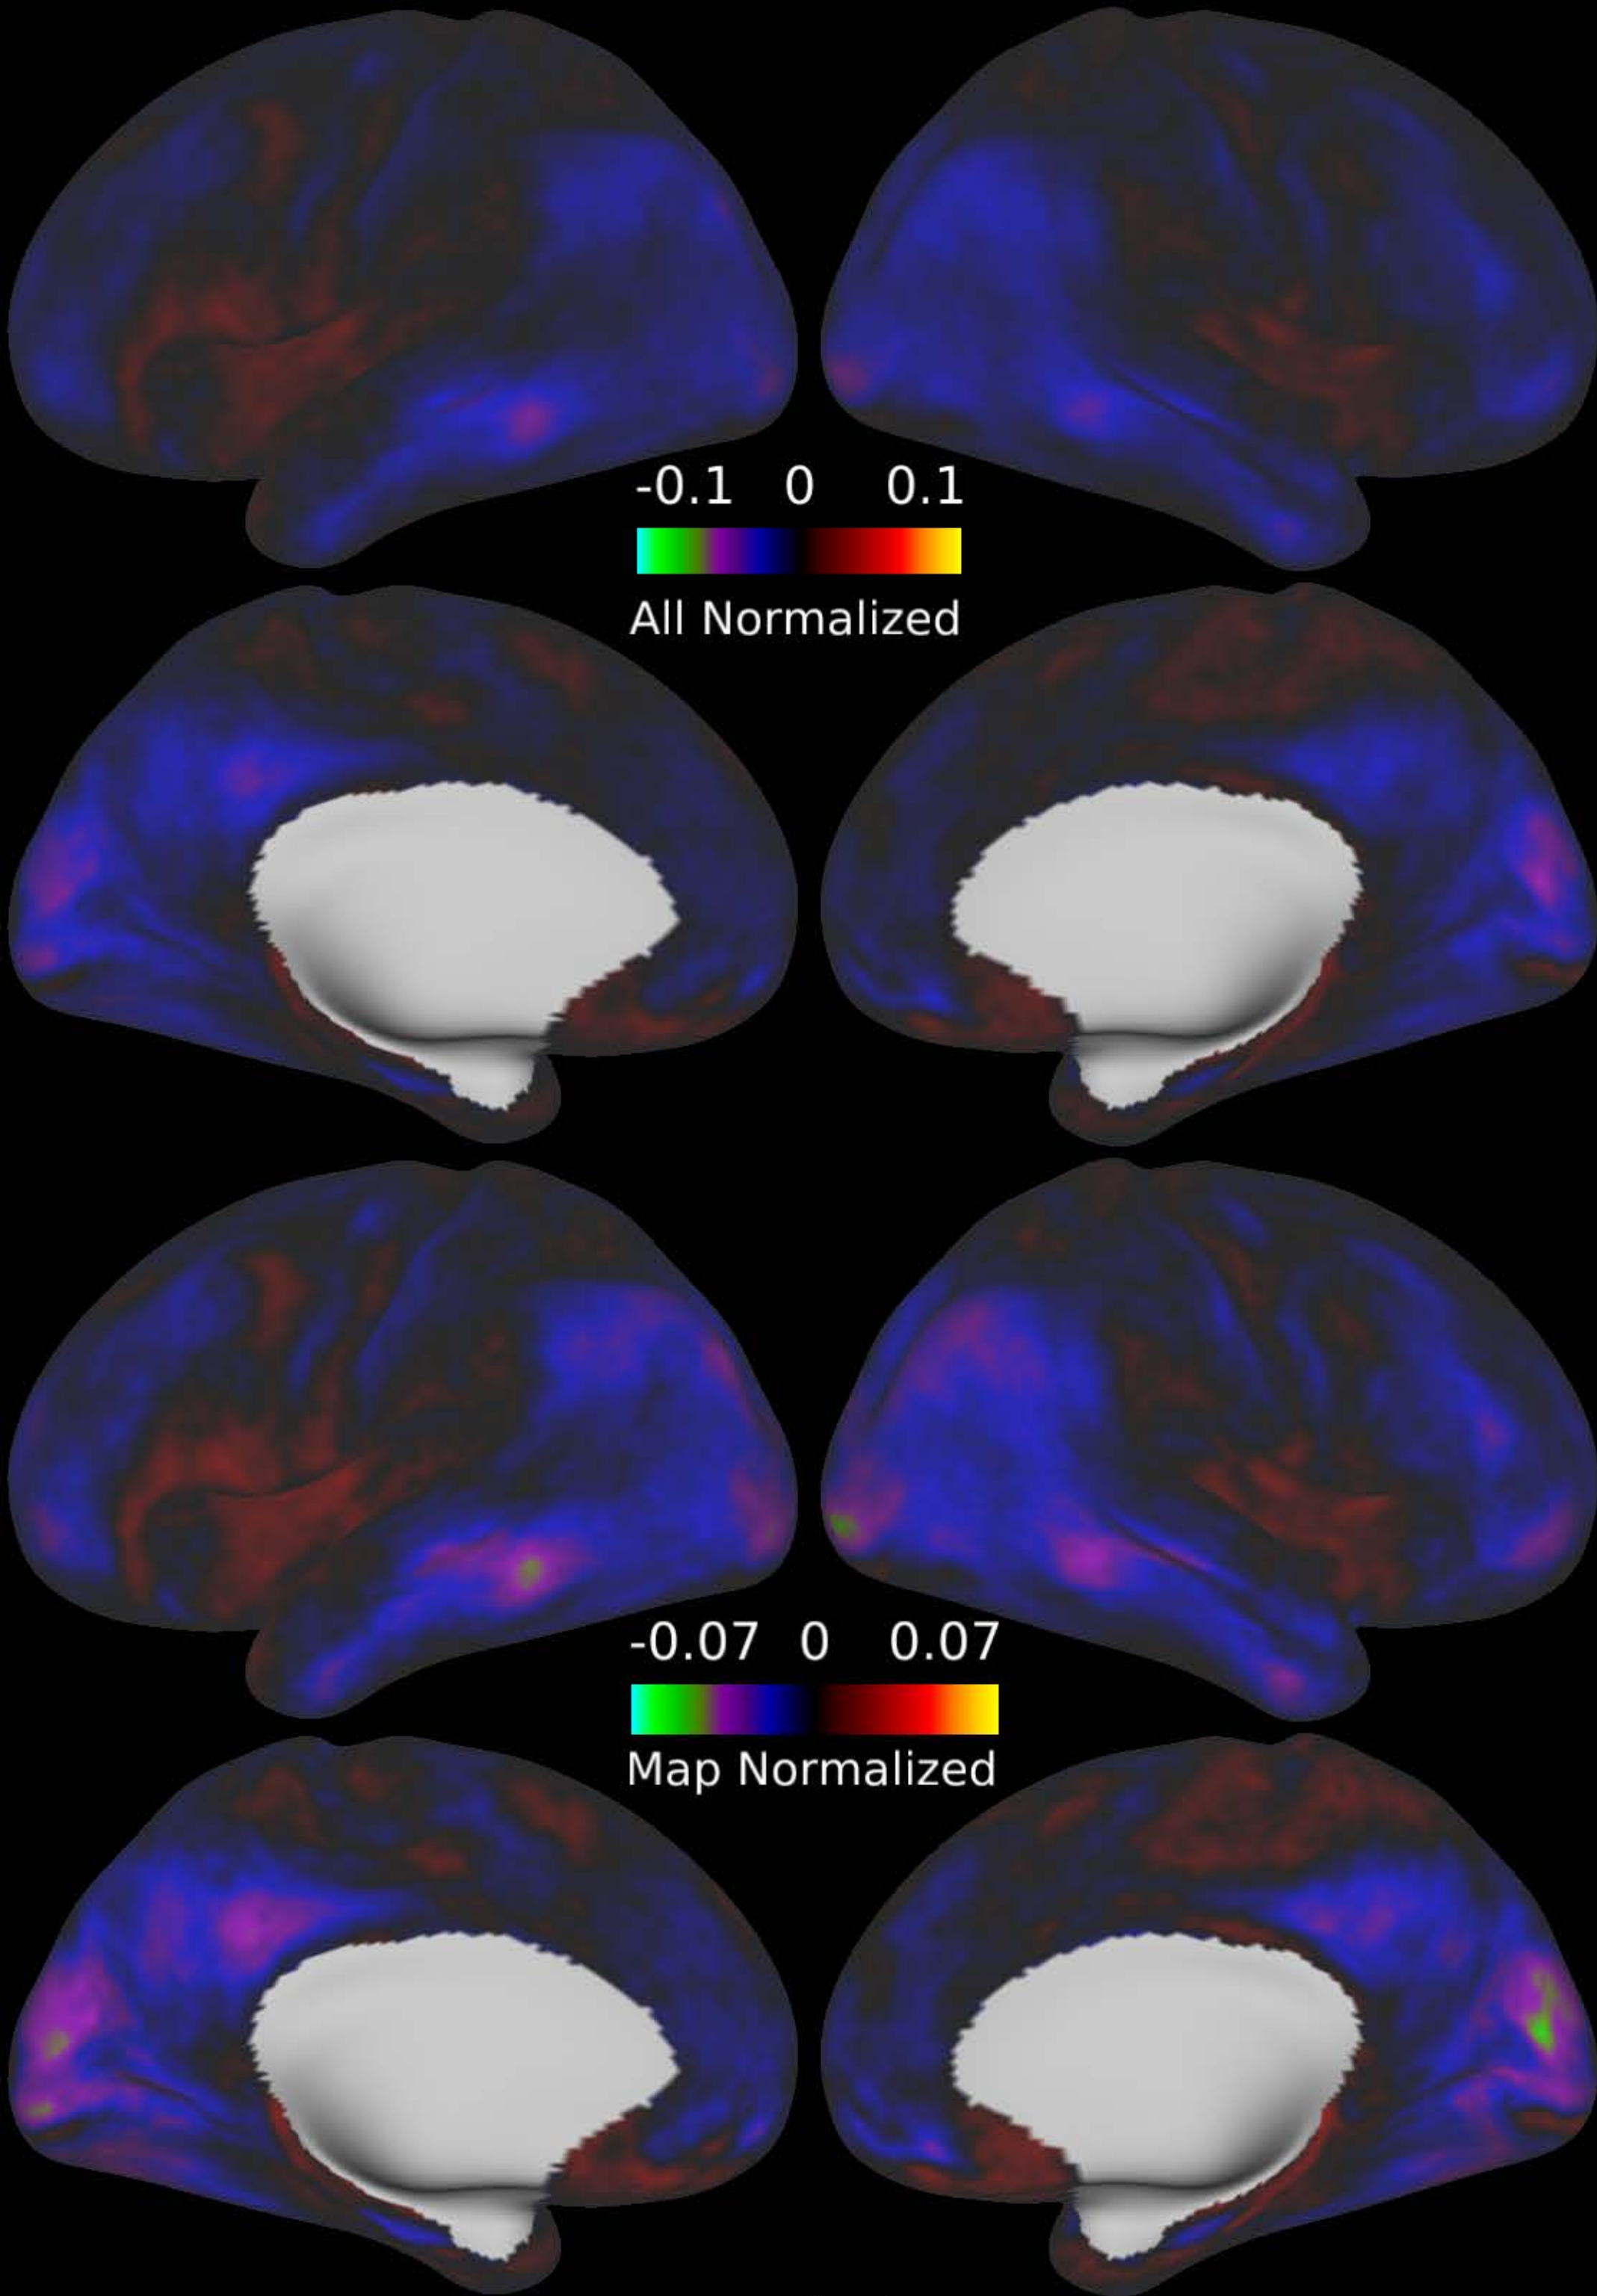

Hertz

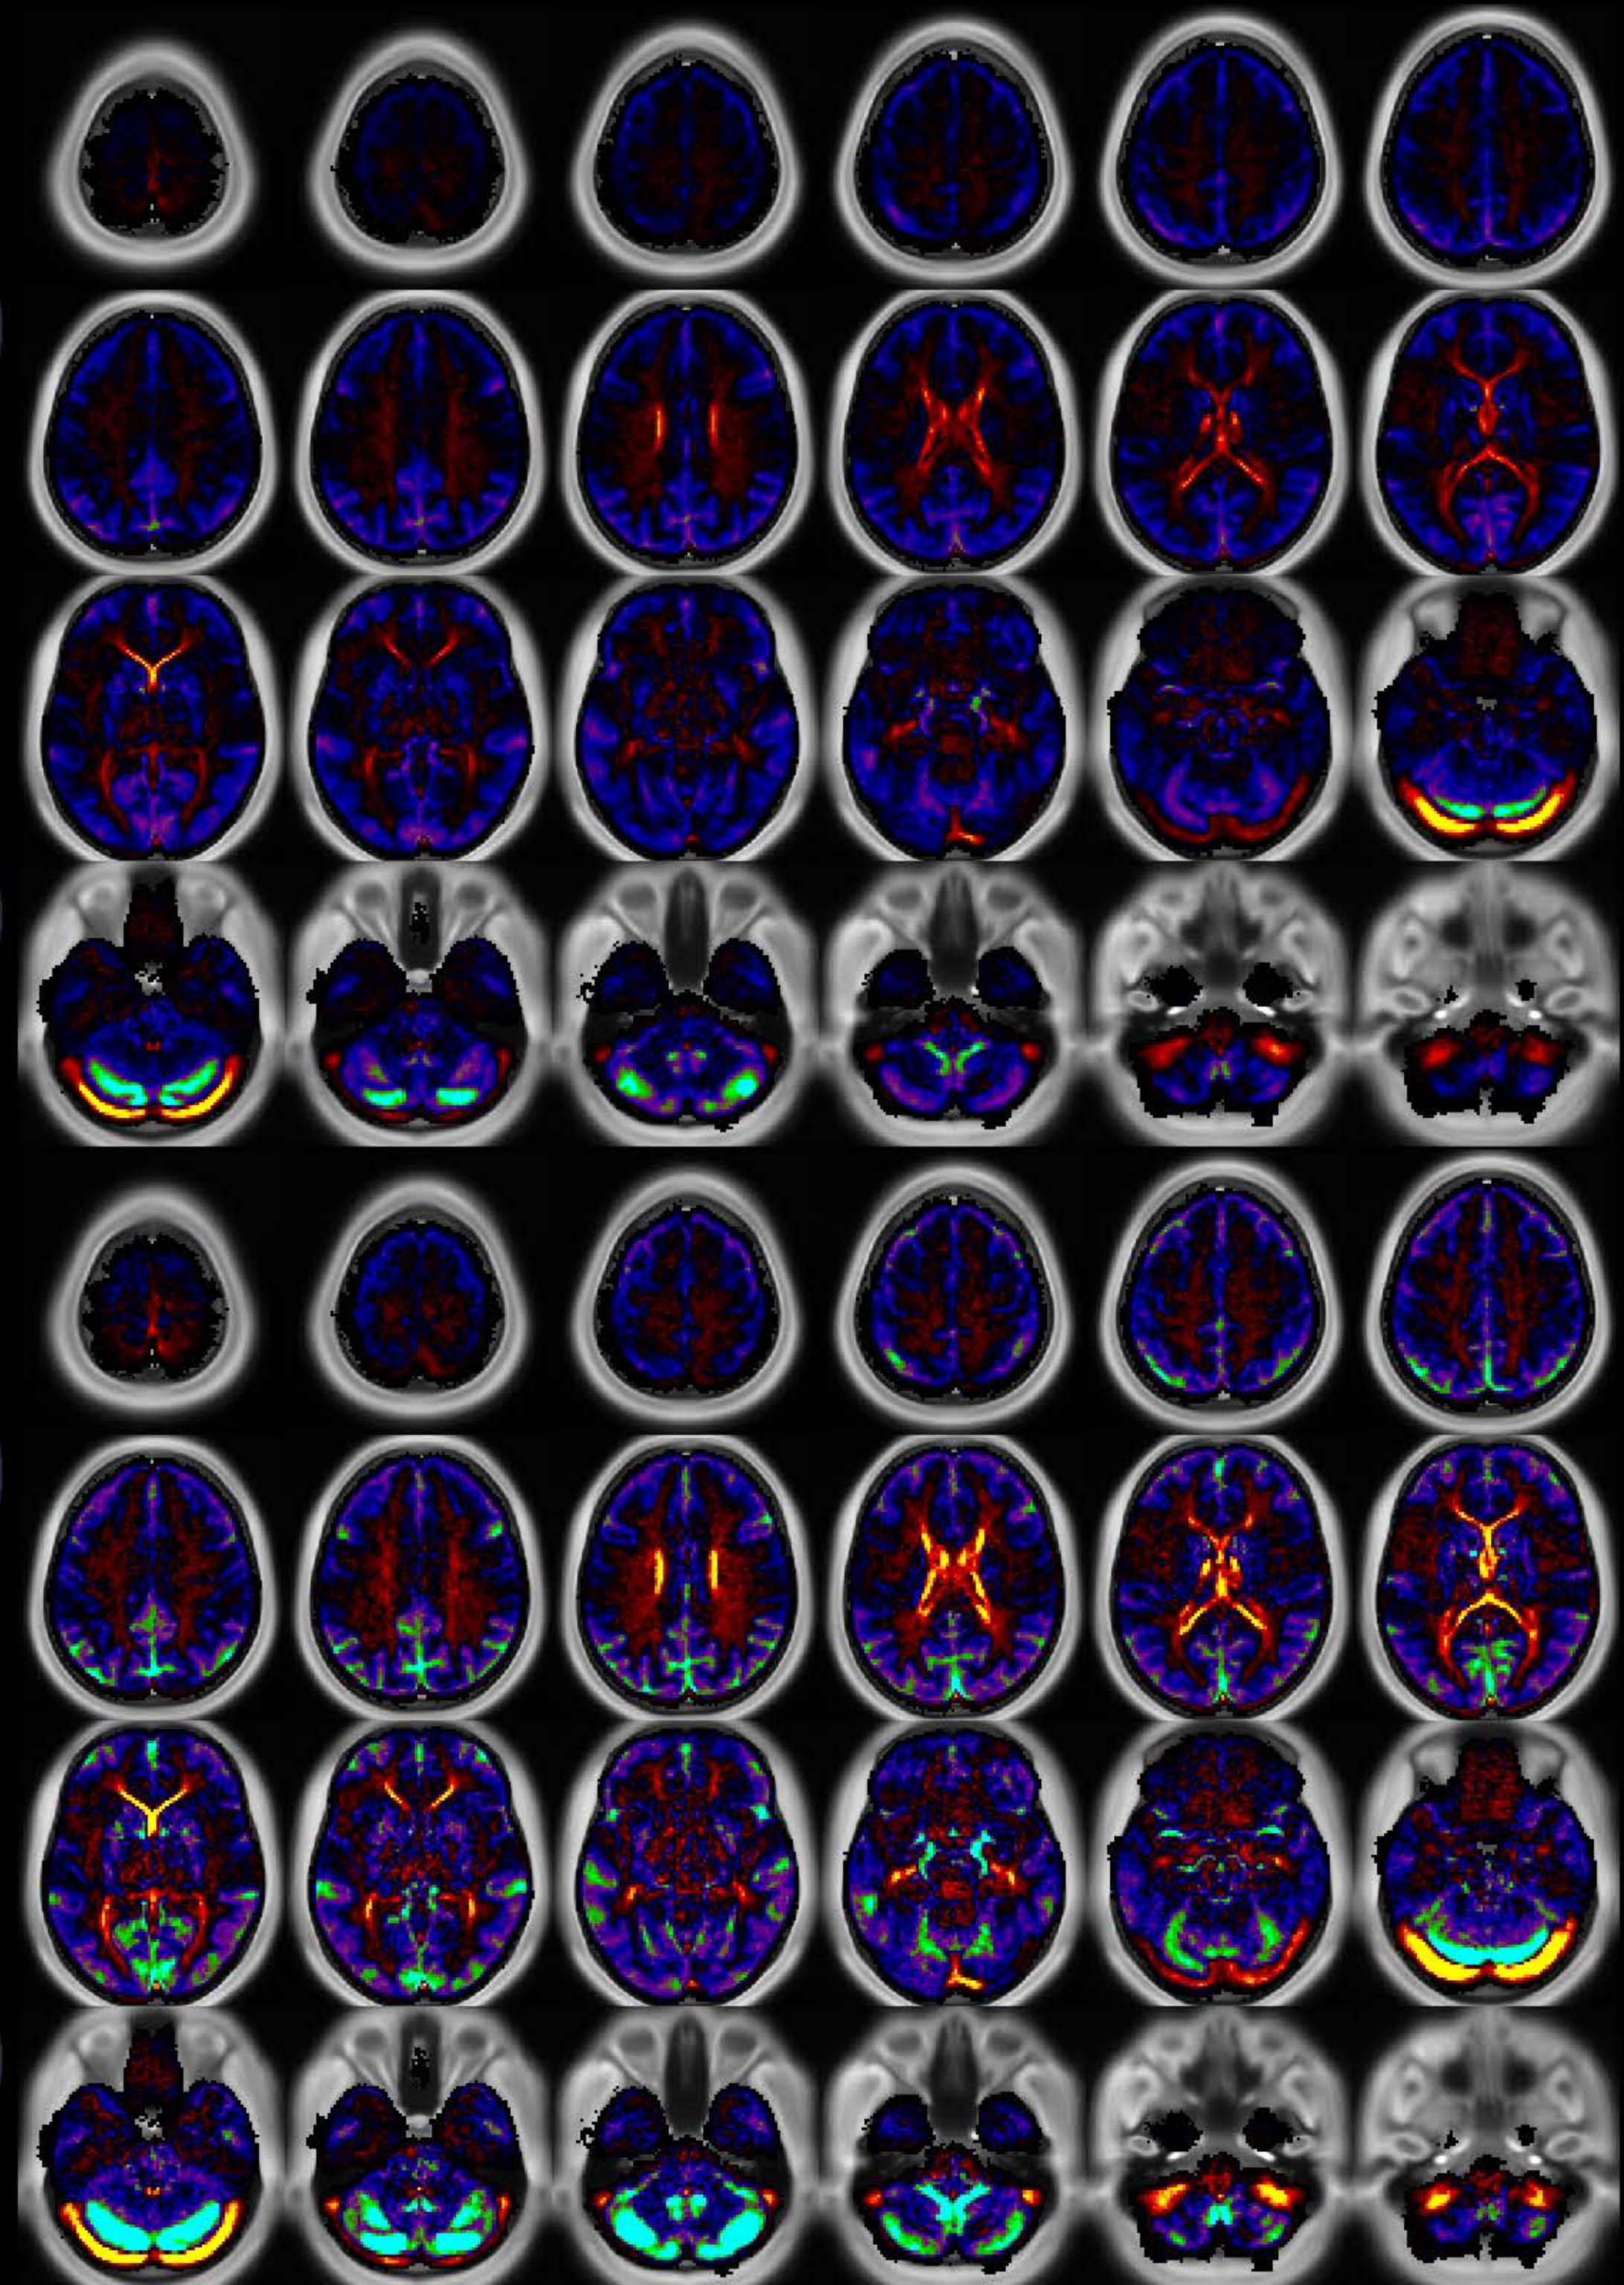

Seconds

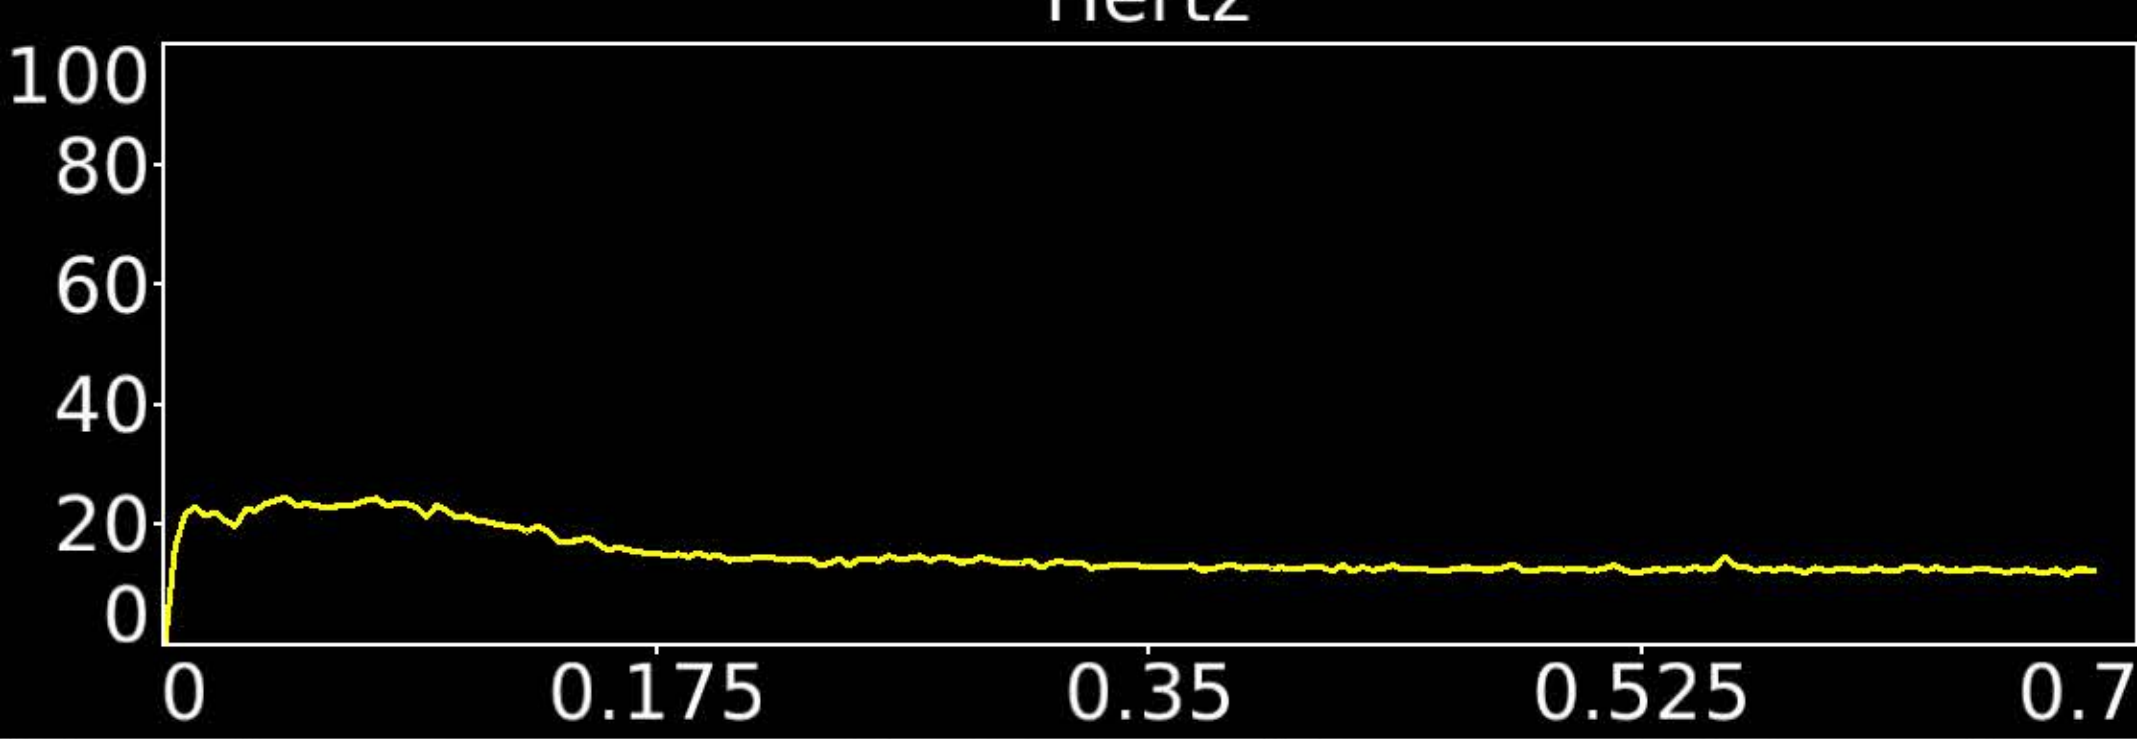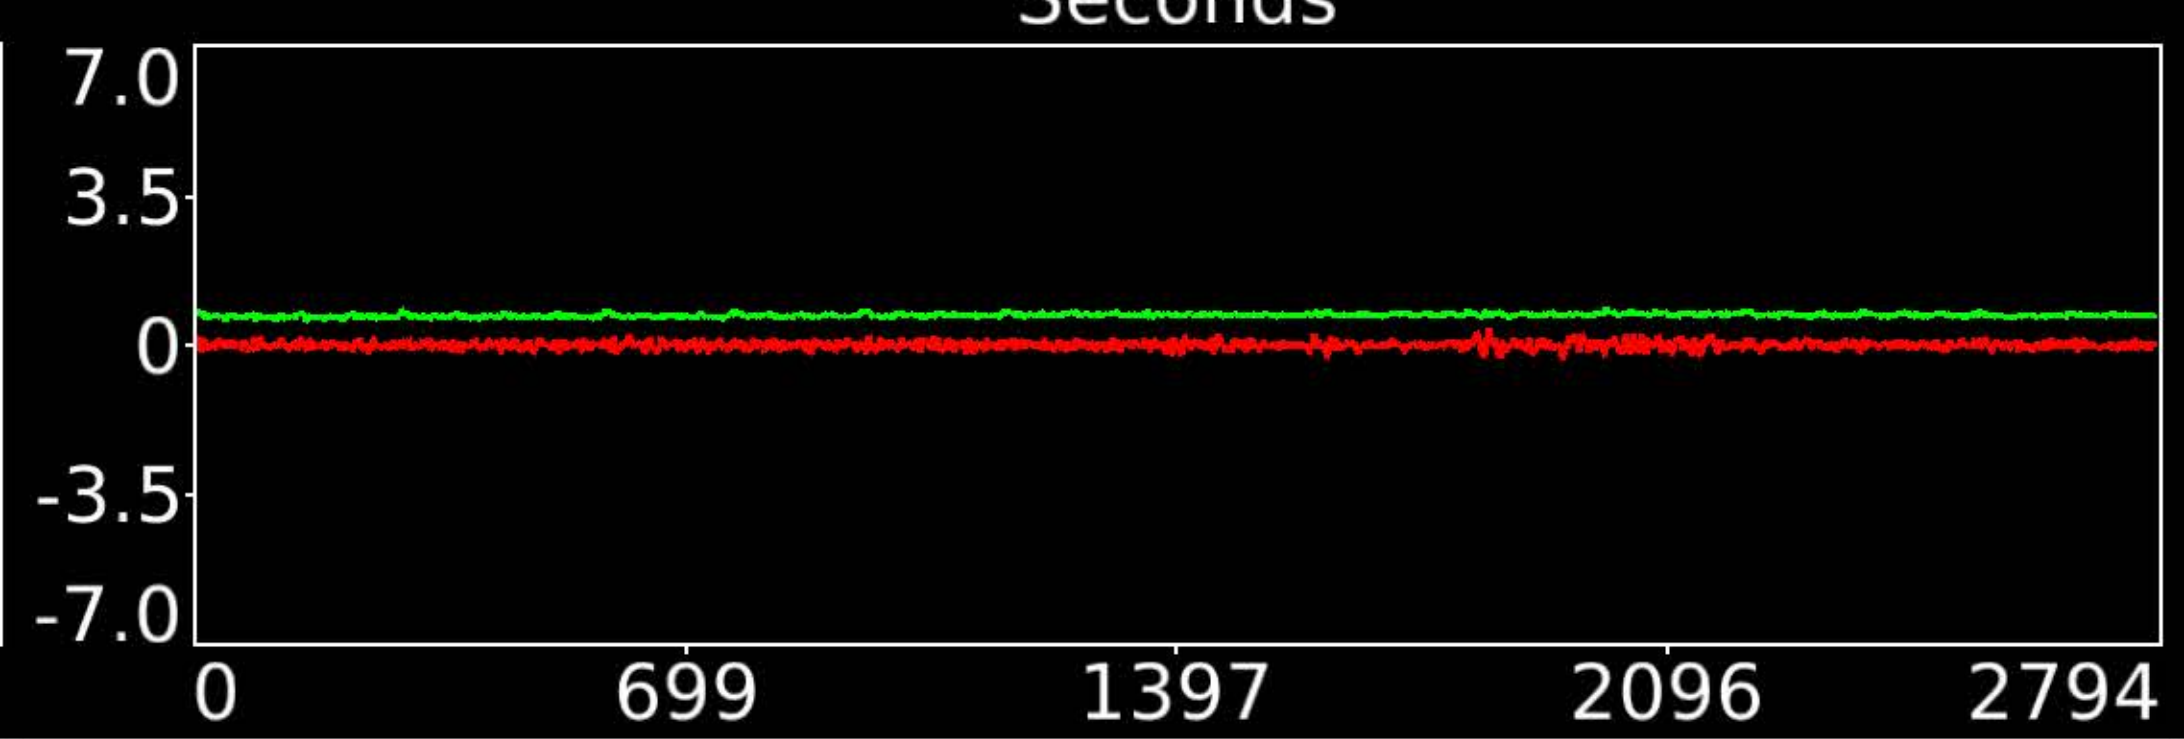

|                                                         |                            |                            |  |
|---------------------------------------------------------|----------------------------|----------------------------|--|
| Number & Class: 47 Noise                                |                            | Name: WM and Veins         |  |
| RVT Correlated: No                                      | DVARS Dip Associated: No   | Cross-Subject Variable: No |  |
| Single Subject: No                                      | % Variance Explained: 0.91 | Globality Index: 1.42      |  |
| Task Component: No                                      | Rest Component: No         | Task Modulated: No         |  |
| Rationale: Spatial map primarily white matter and veins |                            |                            |  |



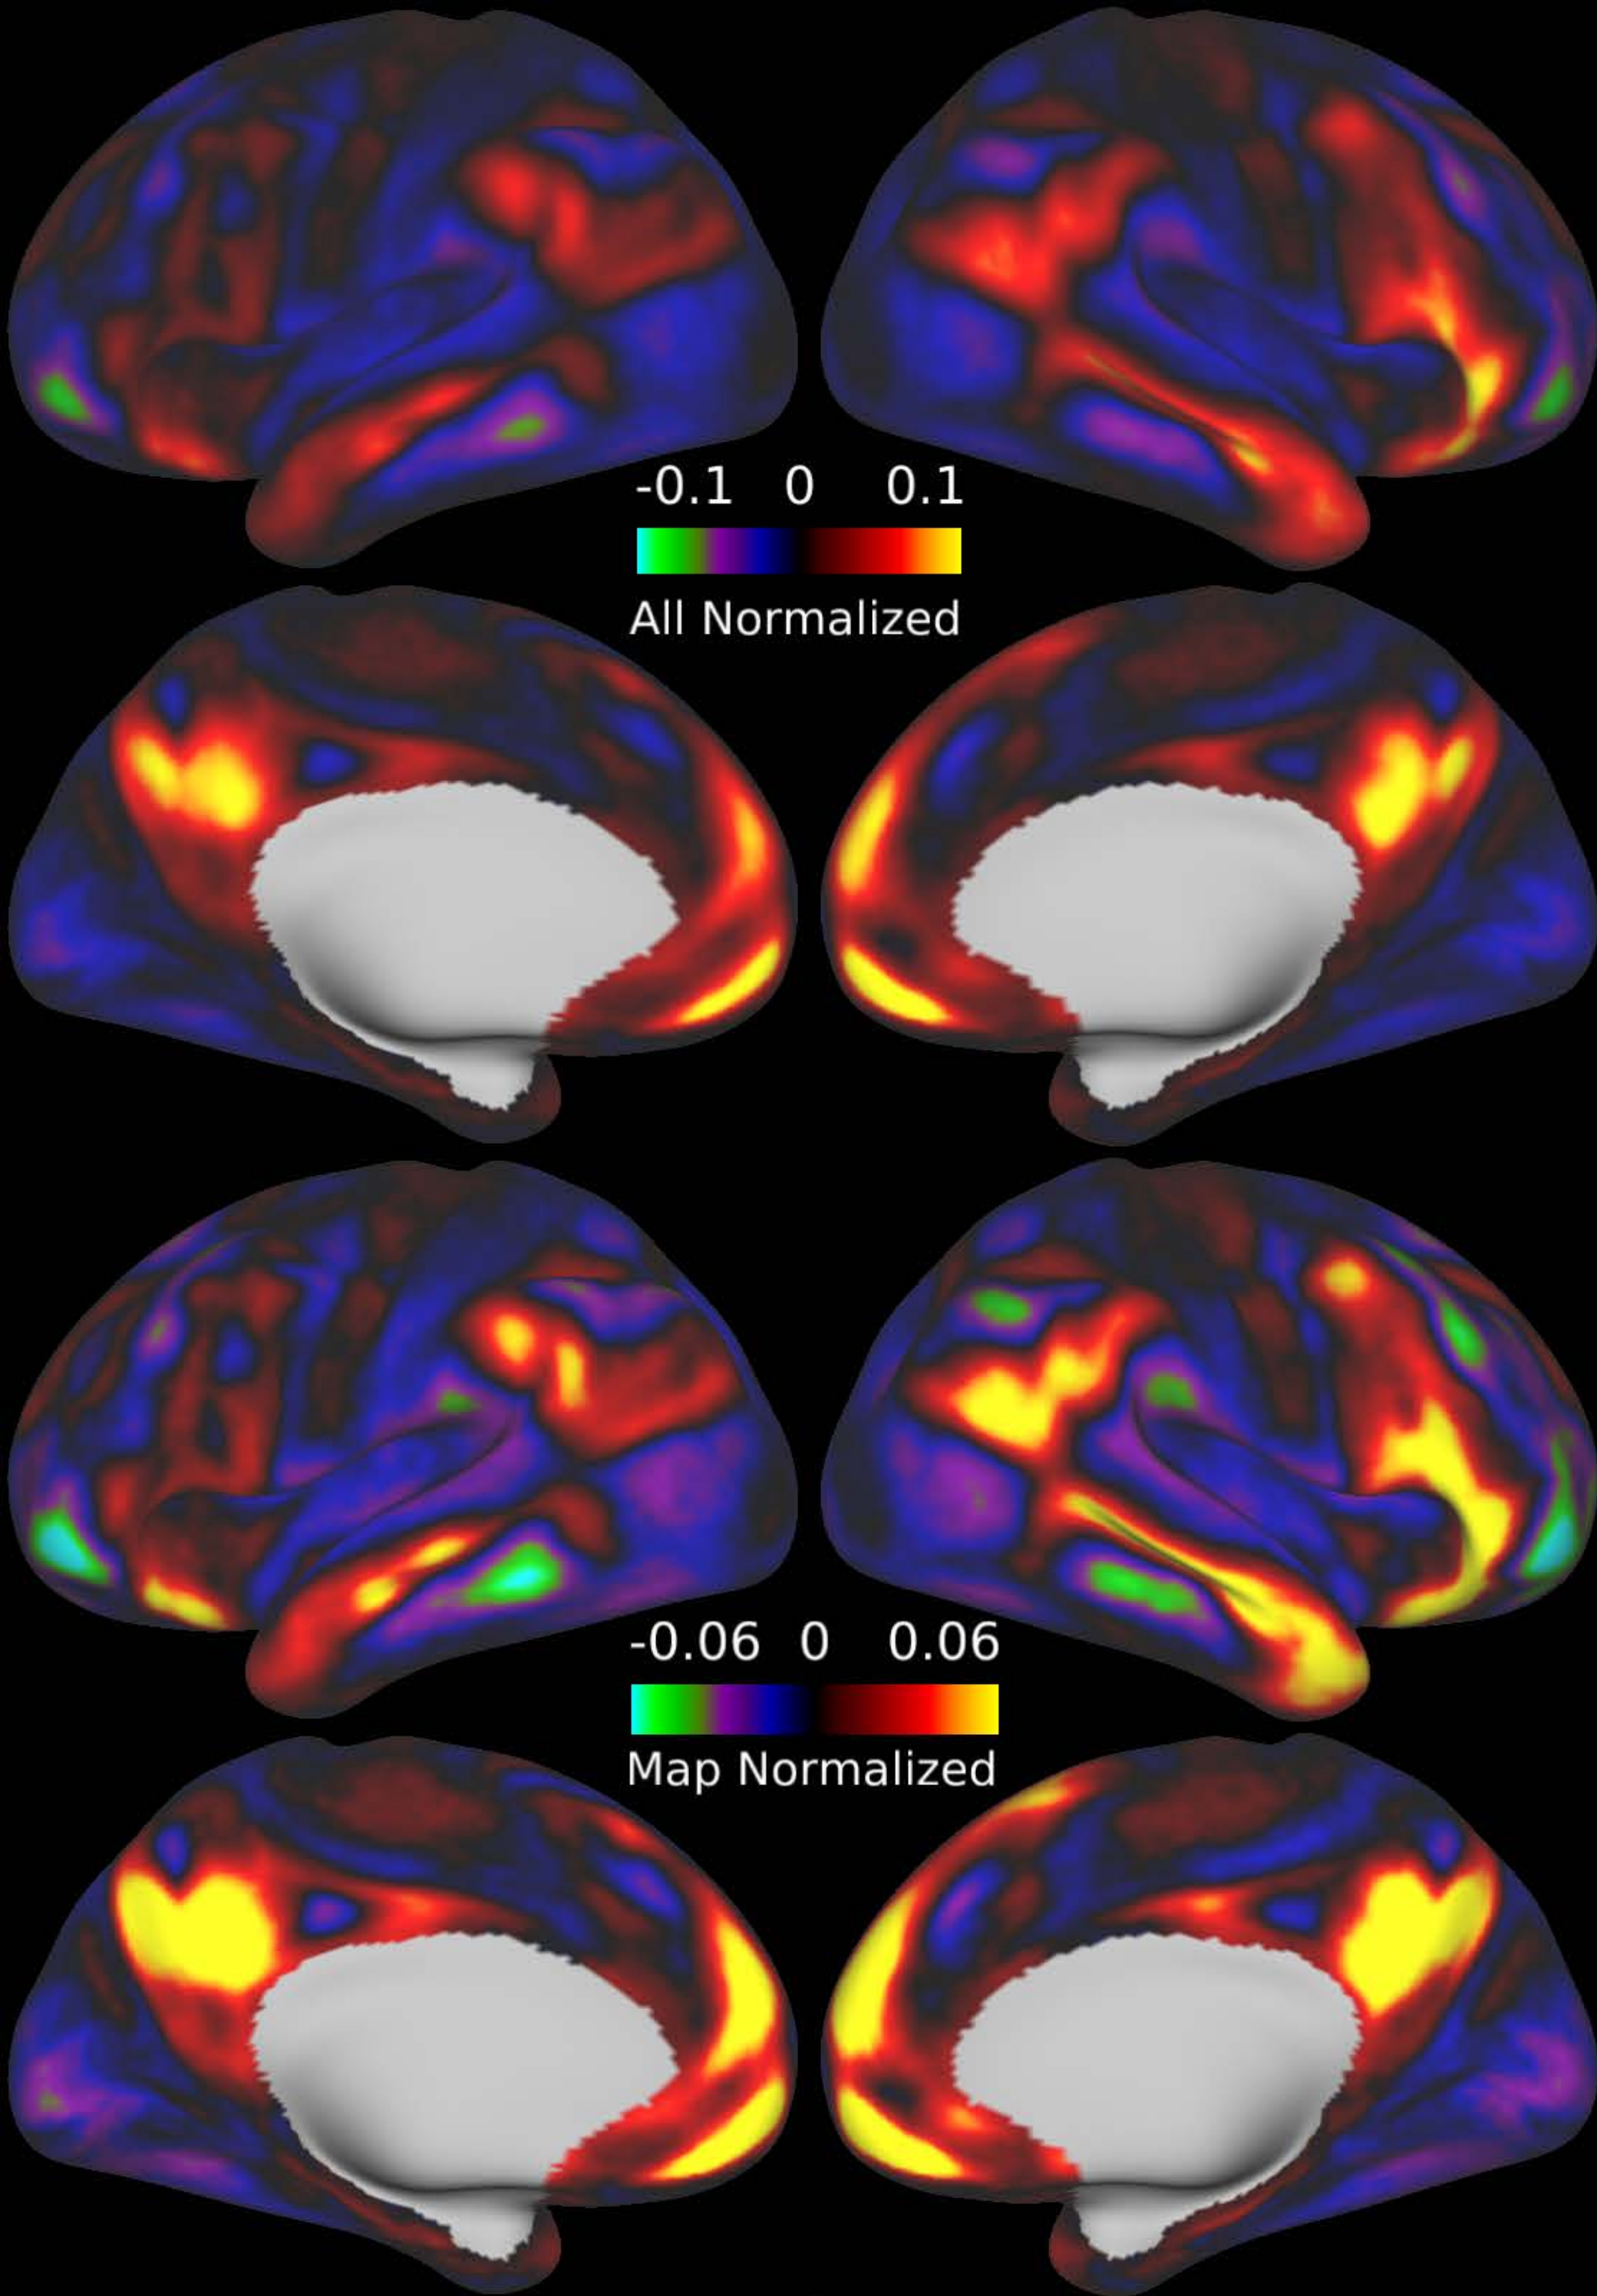

Hertz

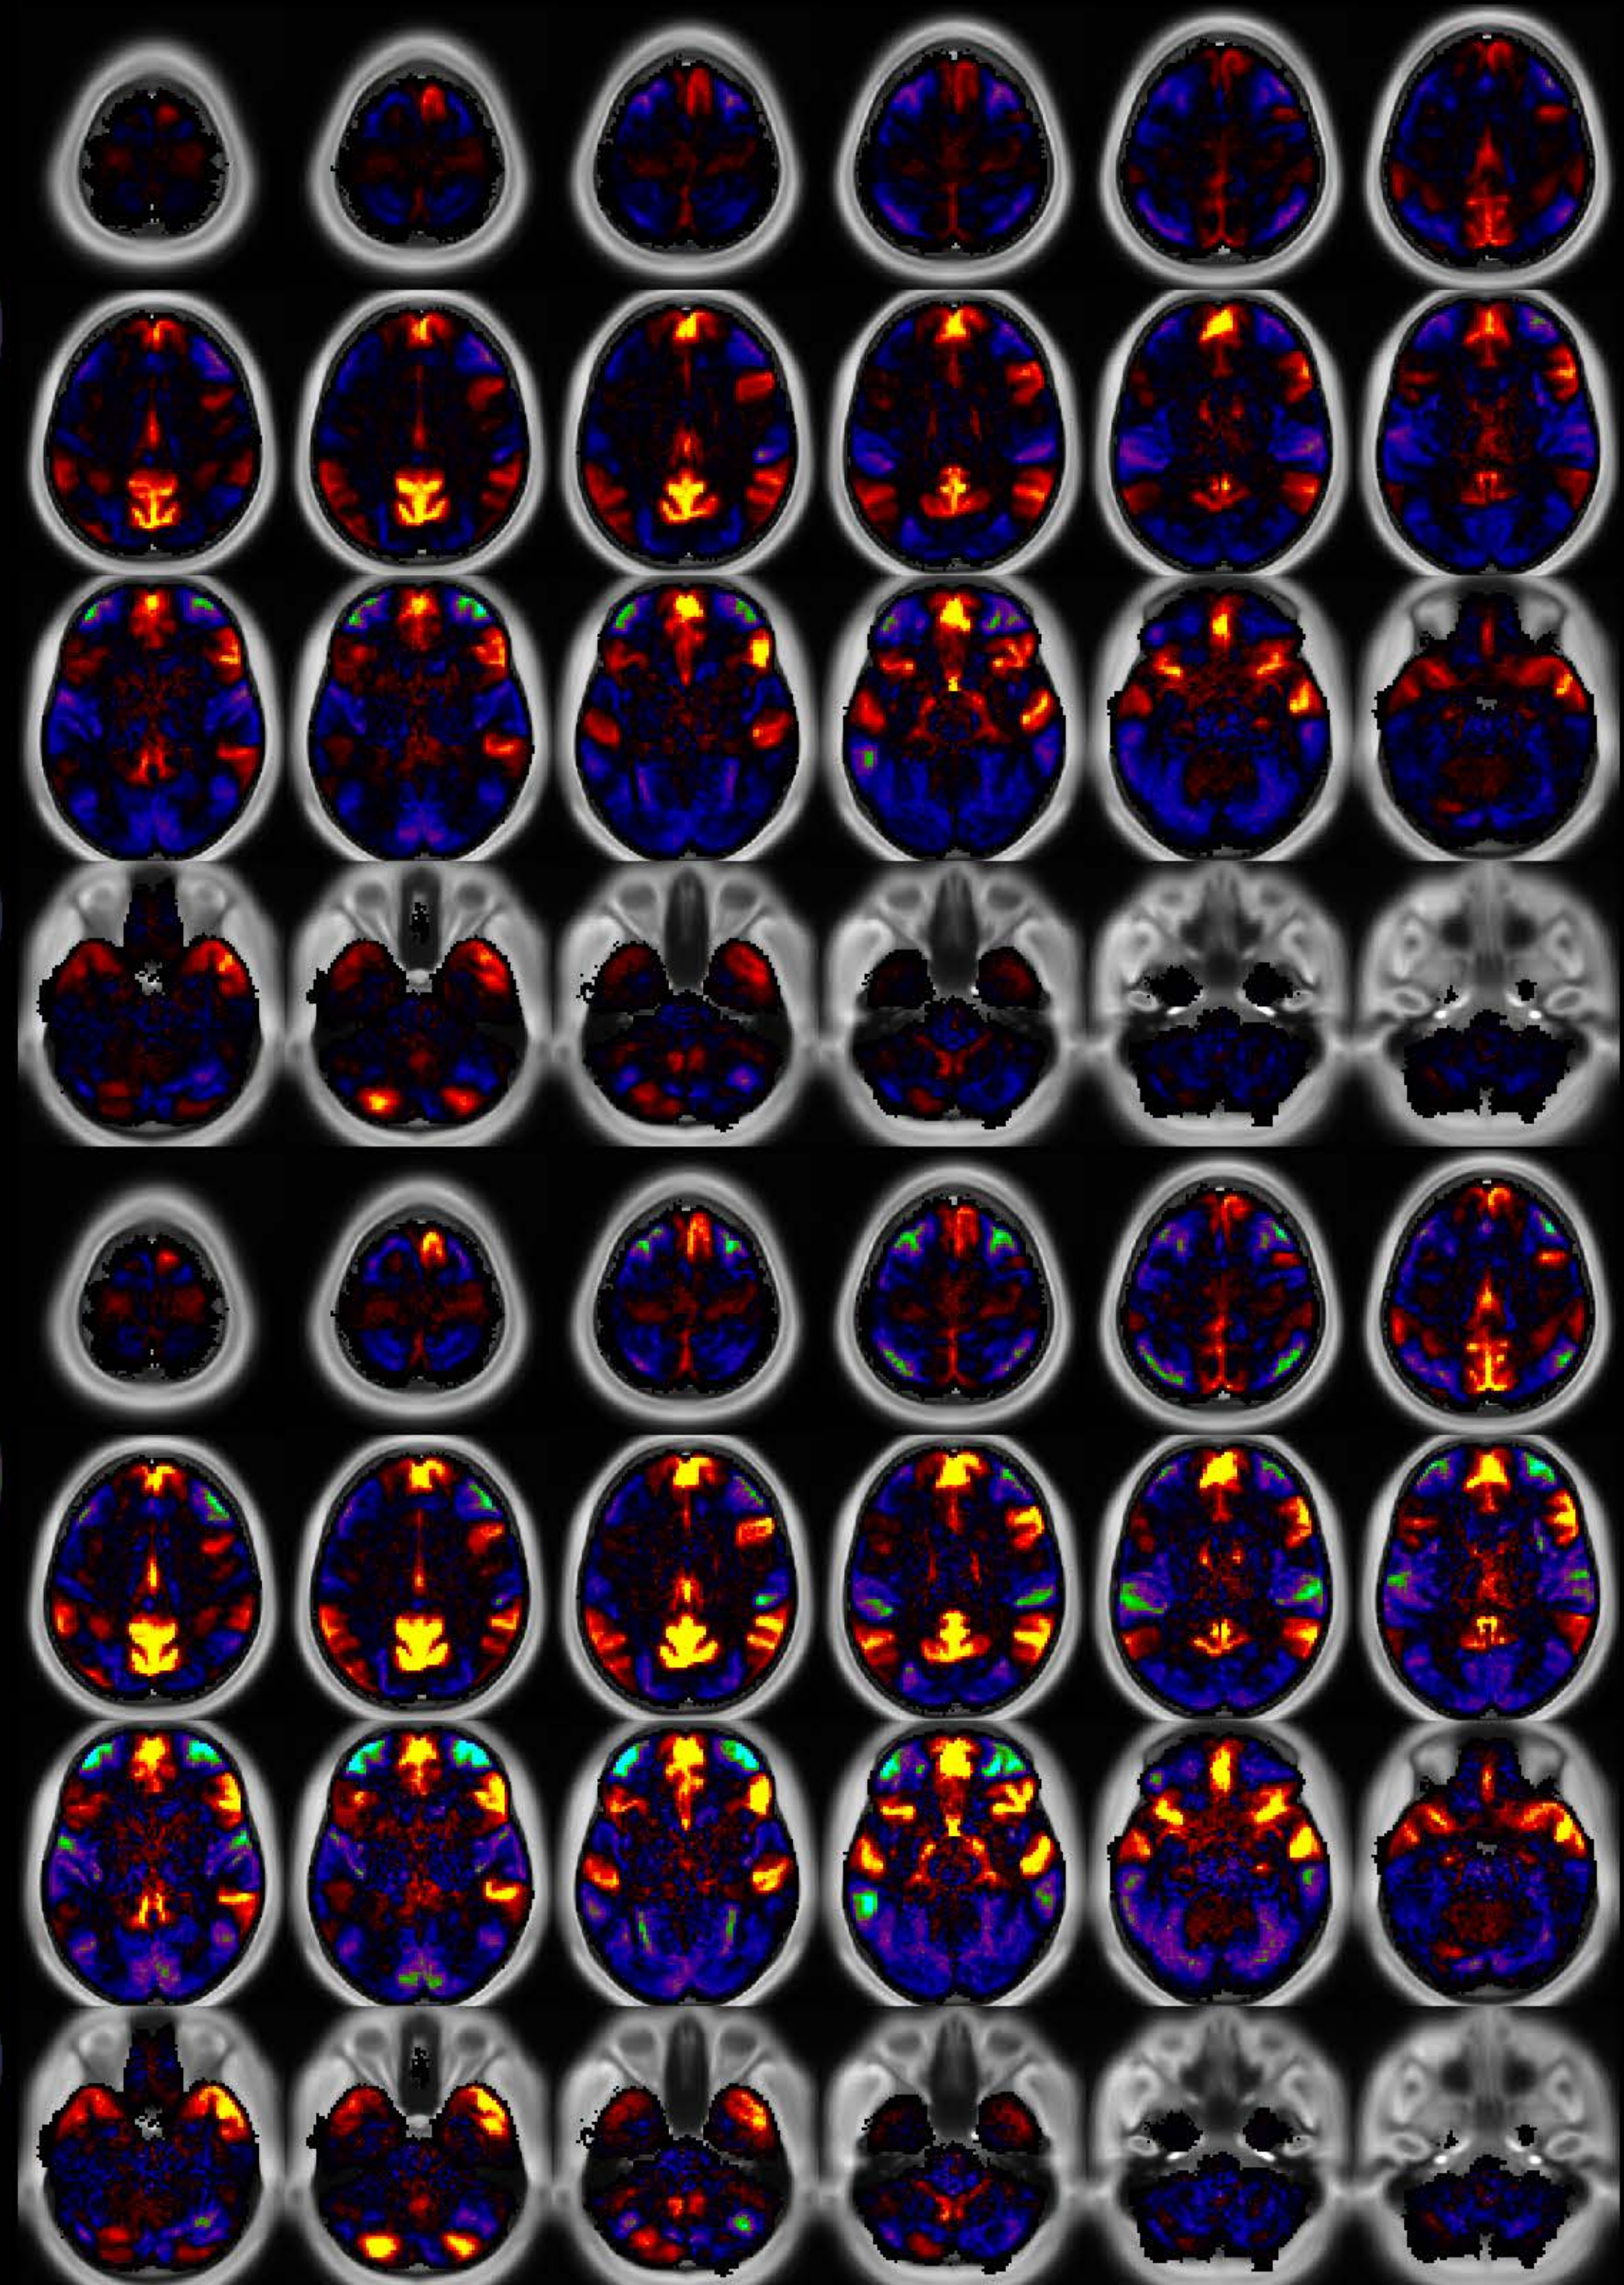

Seconds

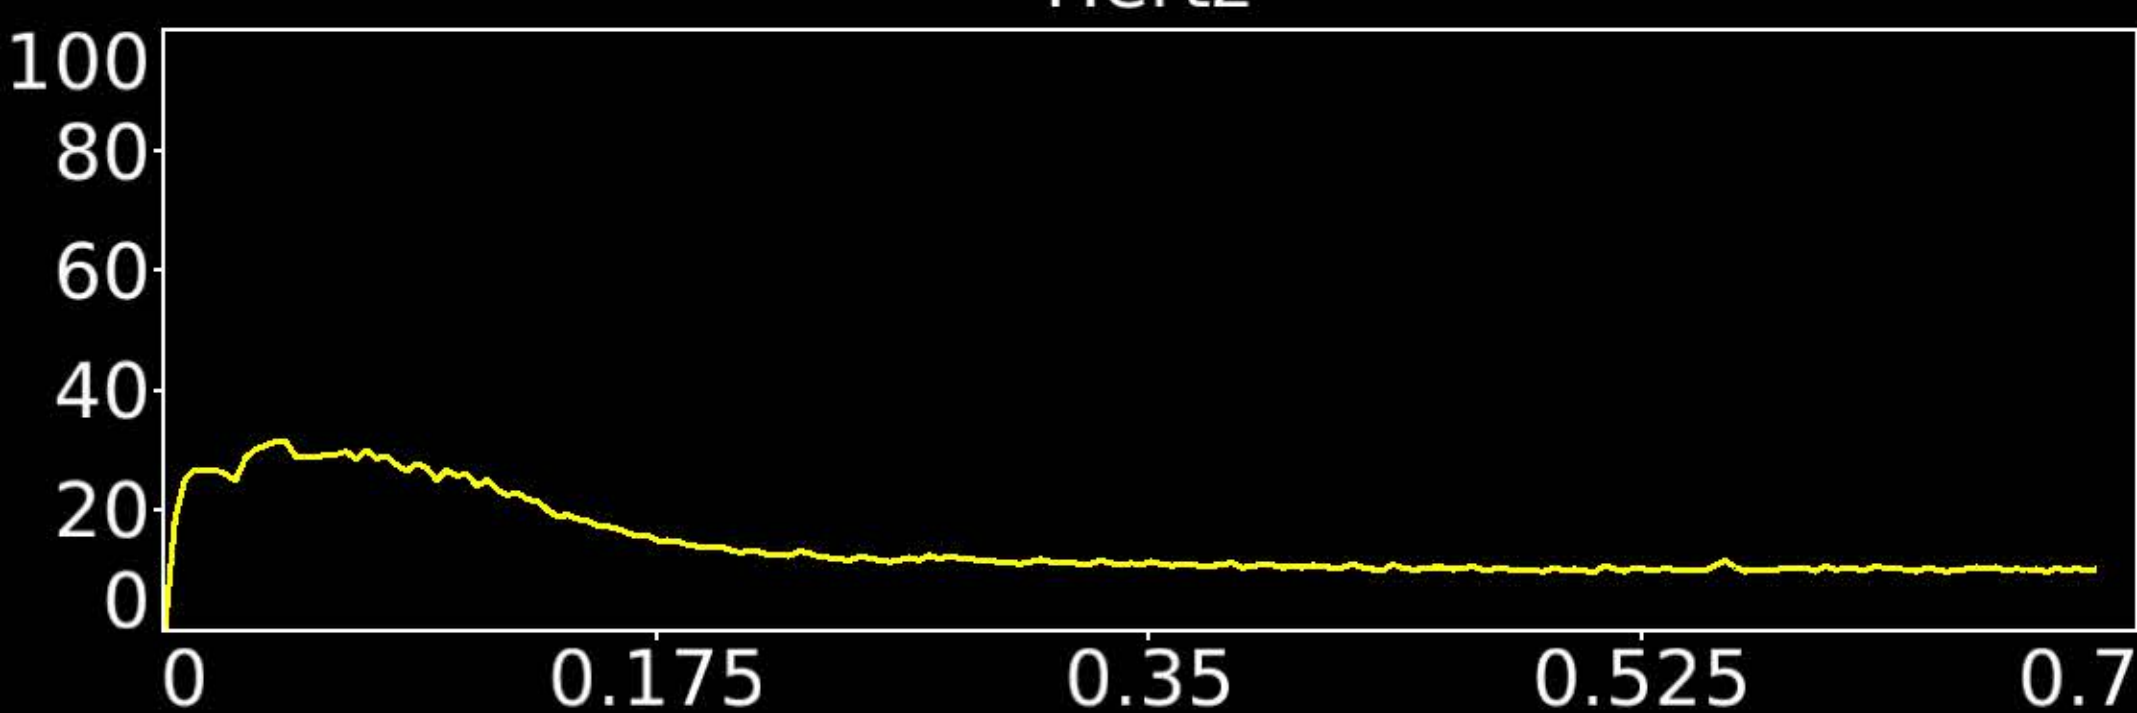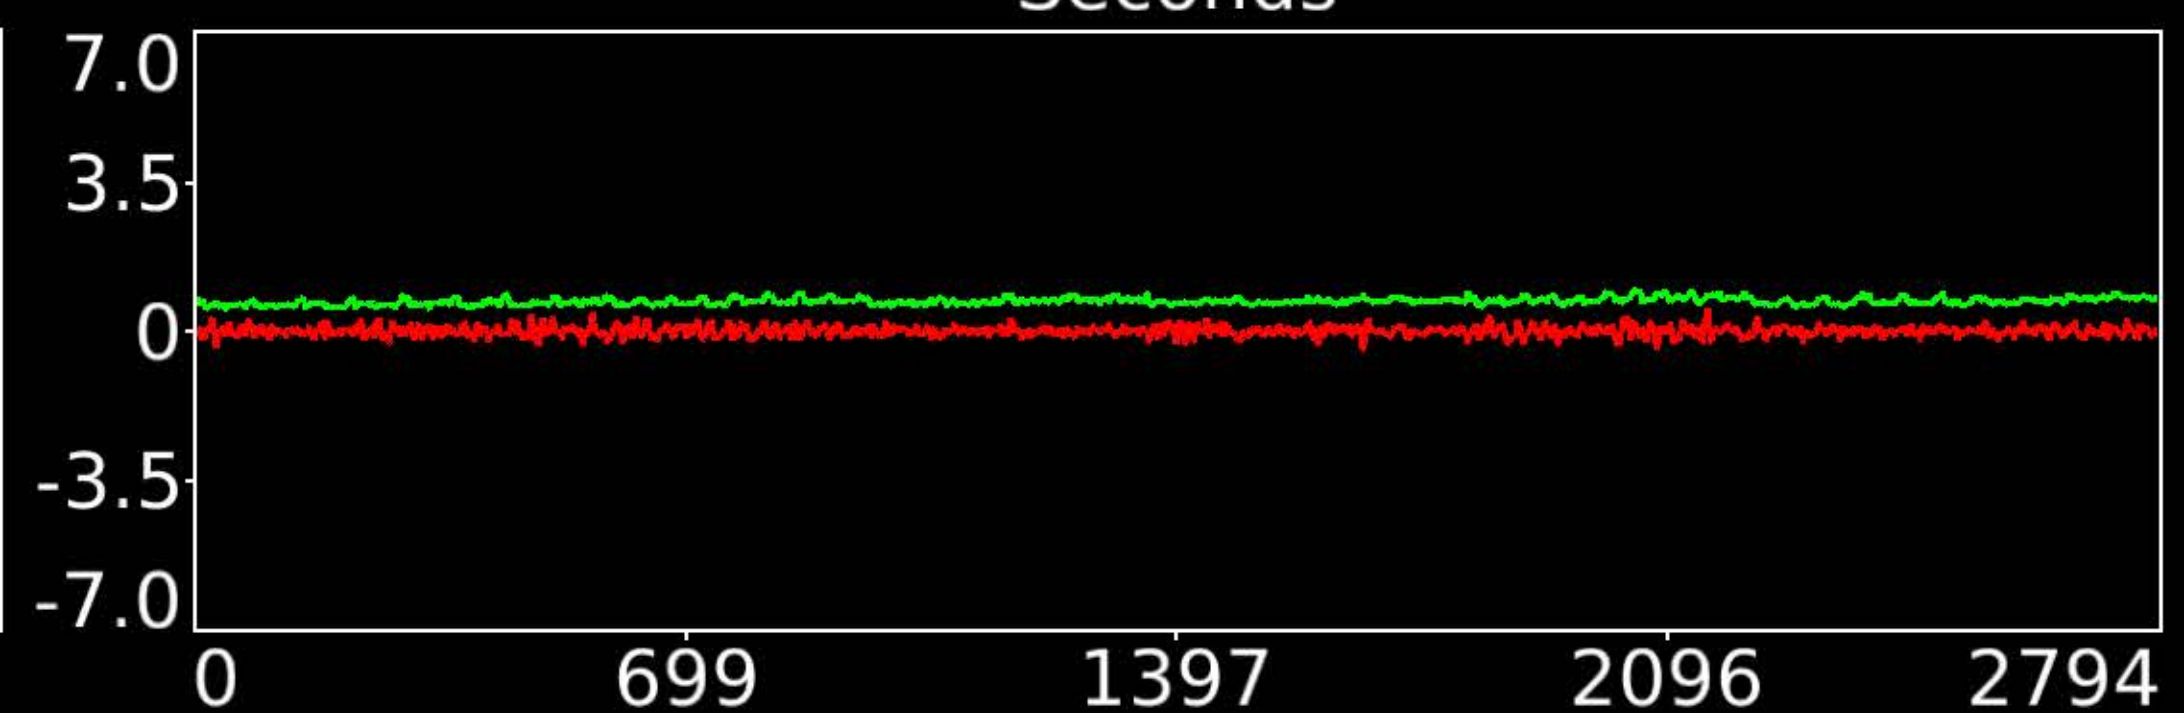

|                                                                                                                   |                            |                               |  |
|-------------------------------------------------------------------------------------------------------------------|----------------------------|-------------------------------|--|
| Number & Class: 48 Signal                                                                                         |                            | Name: Subsidiary Default Mode |  |
| RVT Correlated: No                                                                                                | DVARS Dip Associated: No   | Cross-Subject Variable: No    |  |
| Single Subject: No                                                                                                | % Variance Explained: 0.94 | Globality Index: 0.31         |  |
| Task Component: No                                                                                                | Rest Component: 24         | Task Modulated: No            |  |
| Rationale: Spatial map includes positive and negative patches that respect known RSNs (e.g. Default Mode Network) |                            |                               |  |



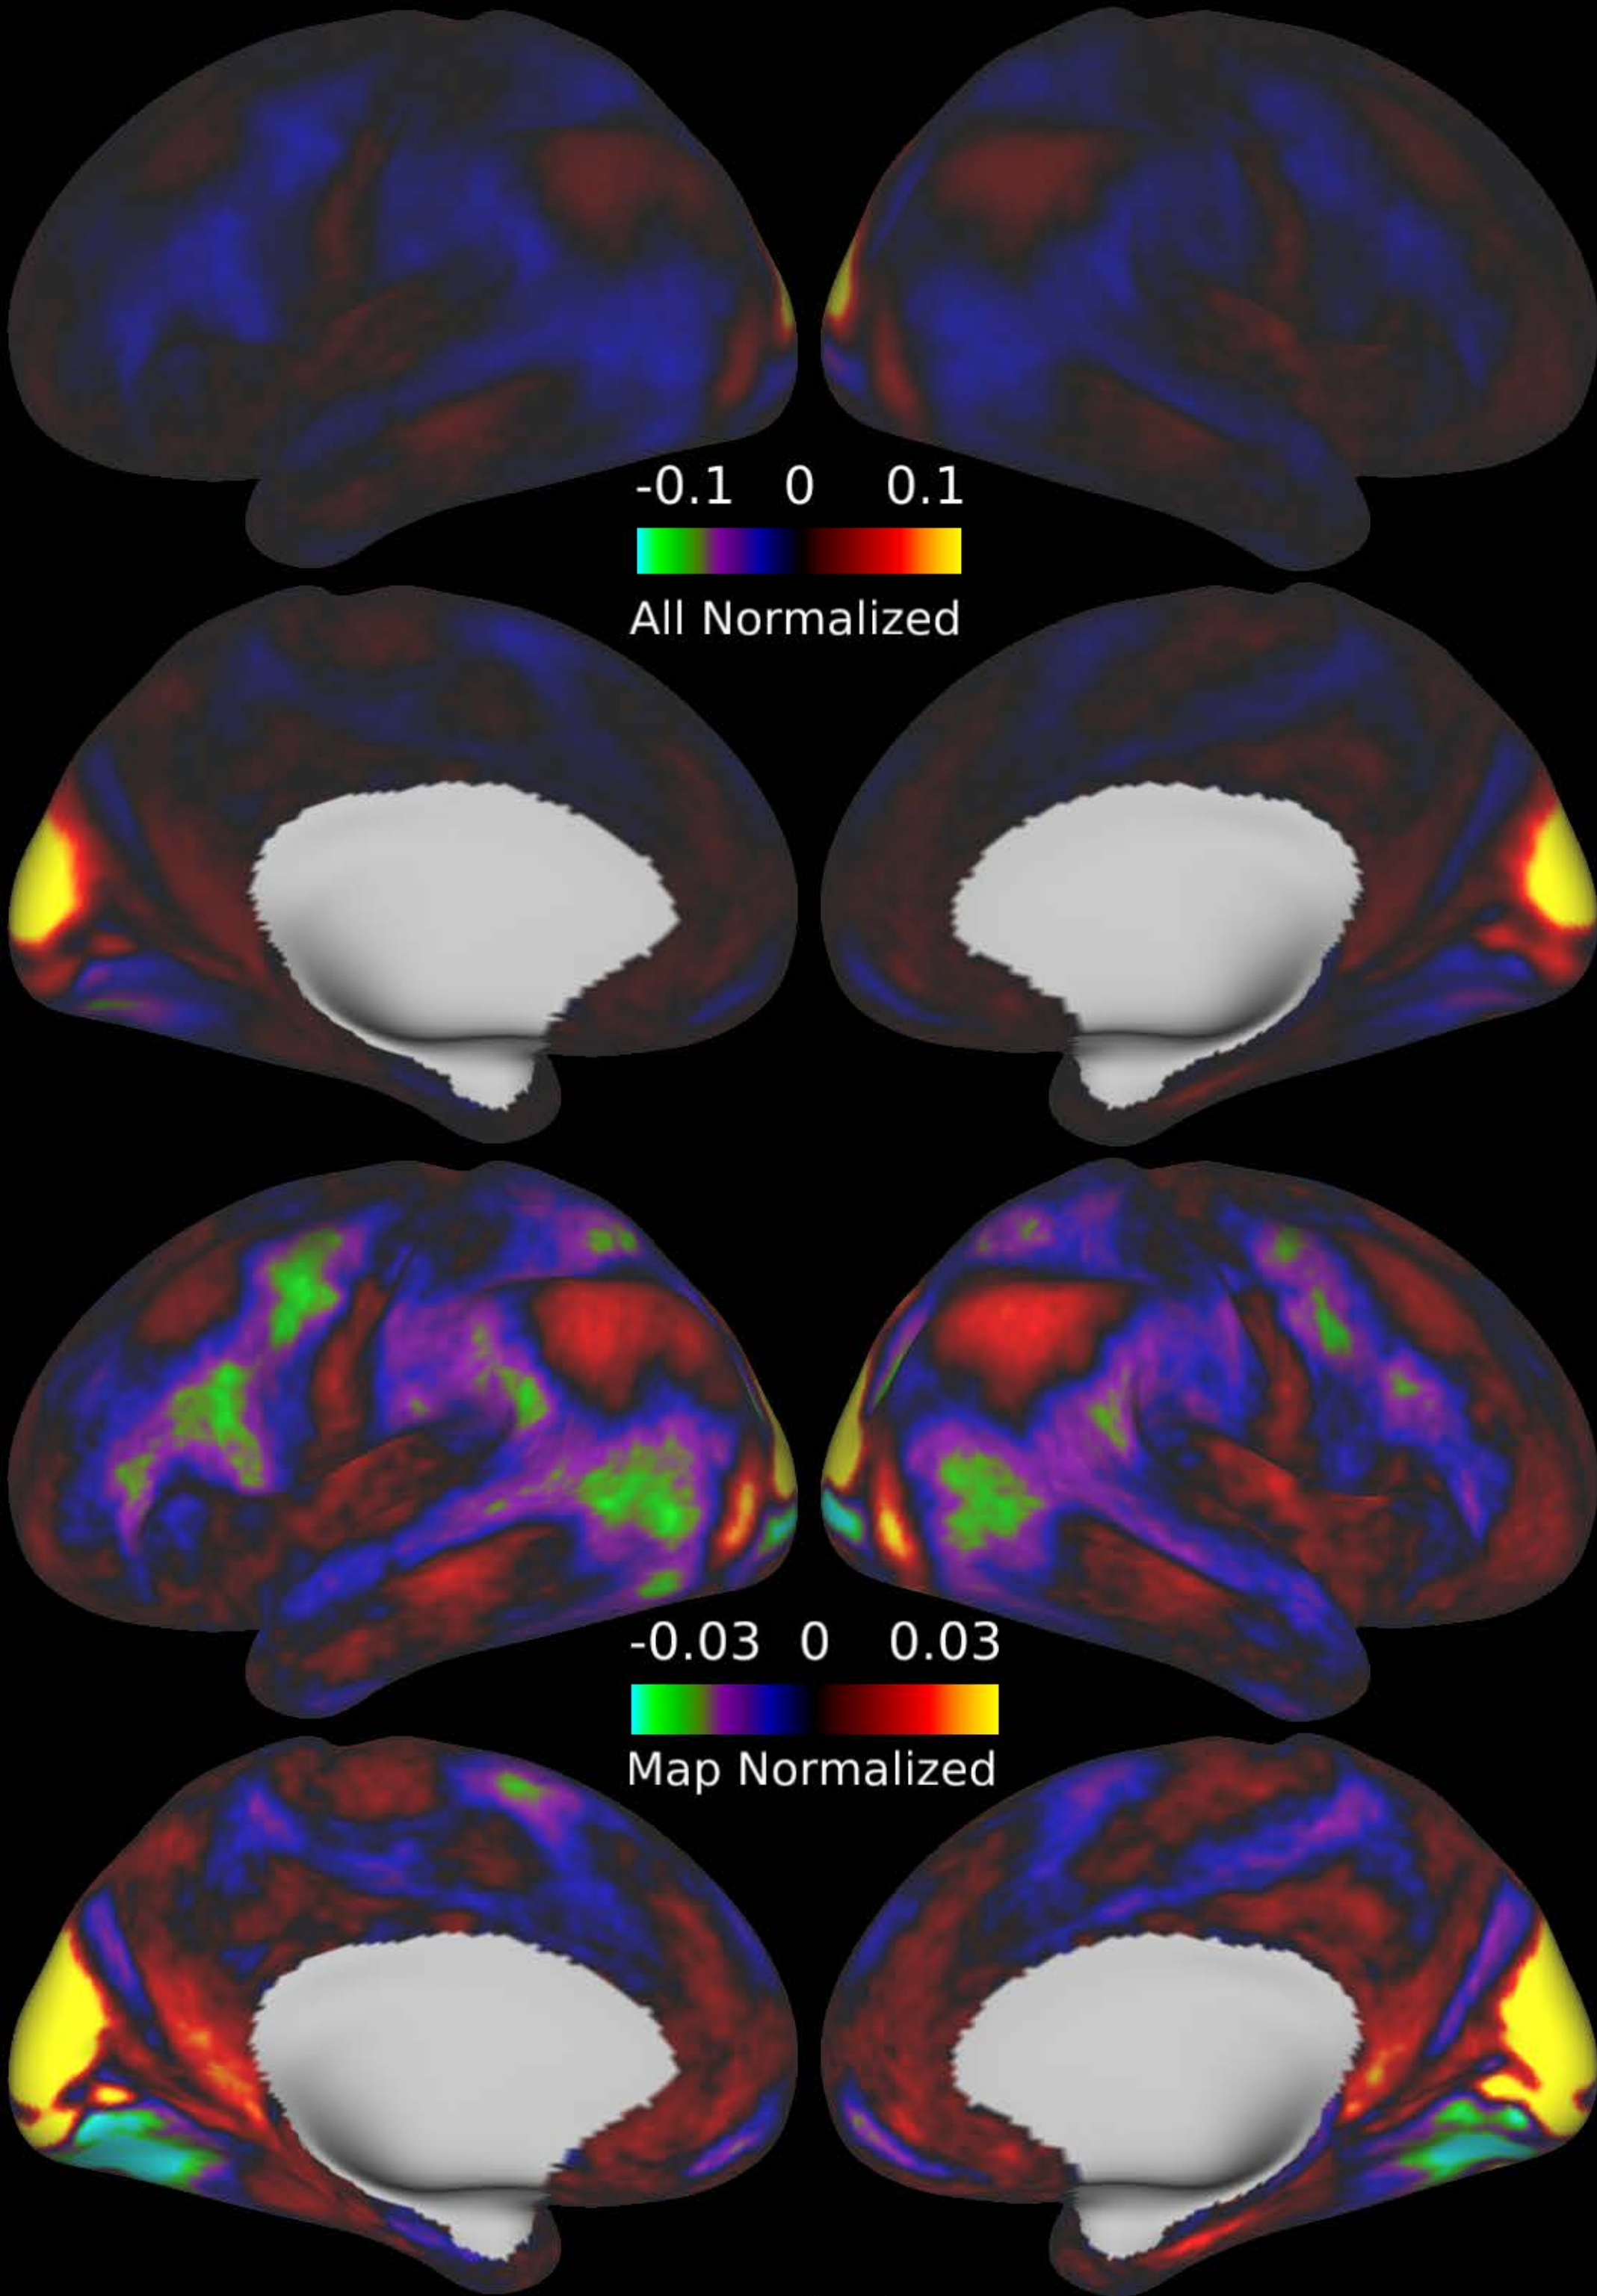

Hertz

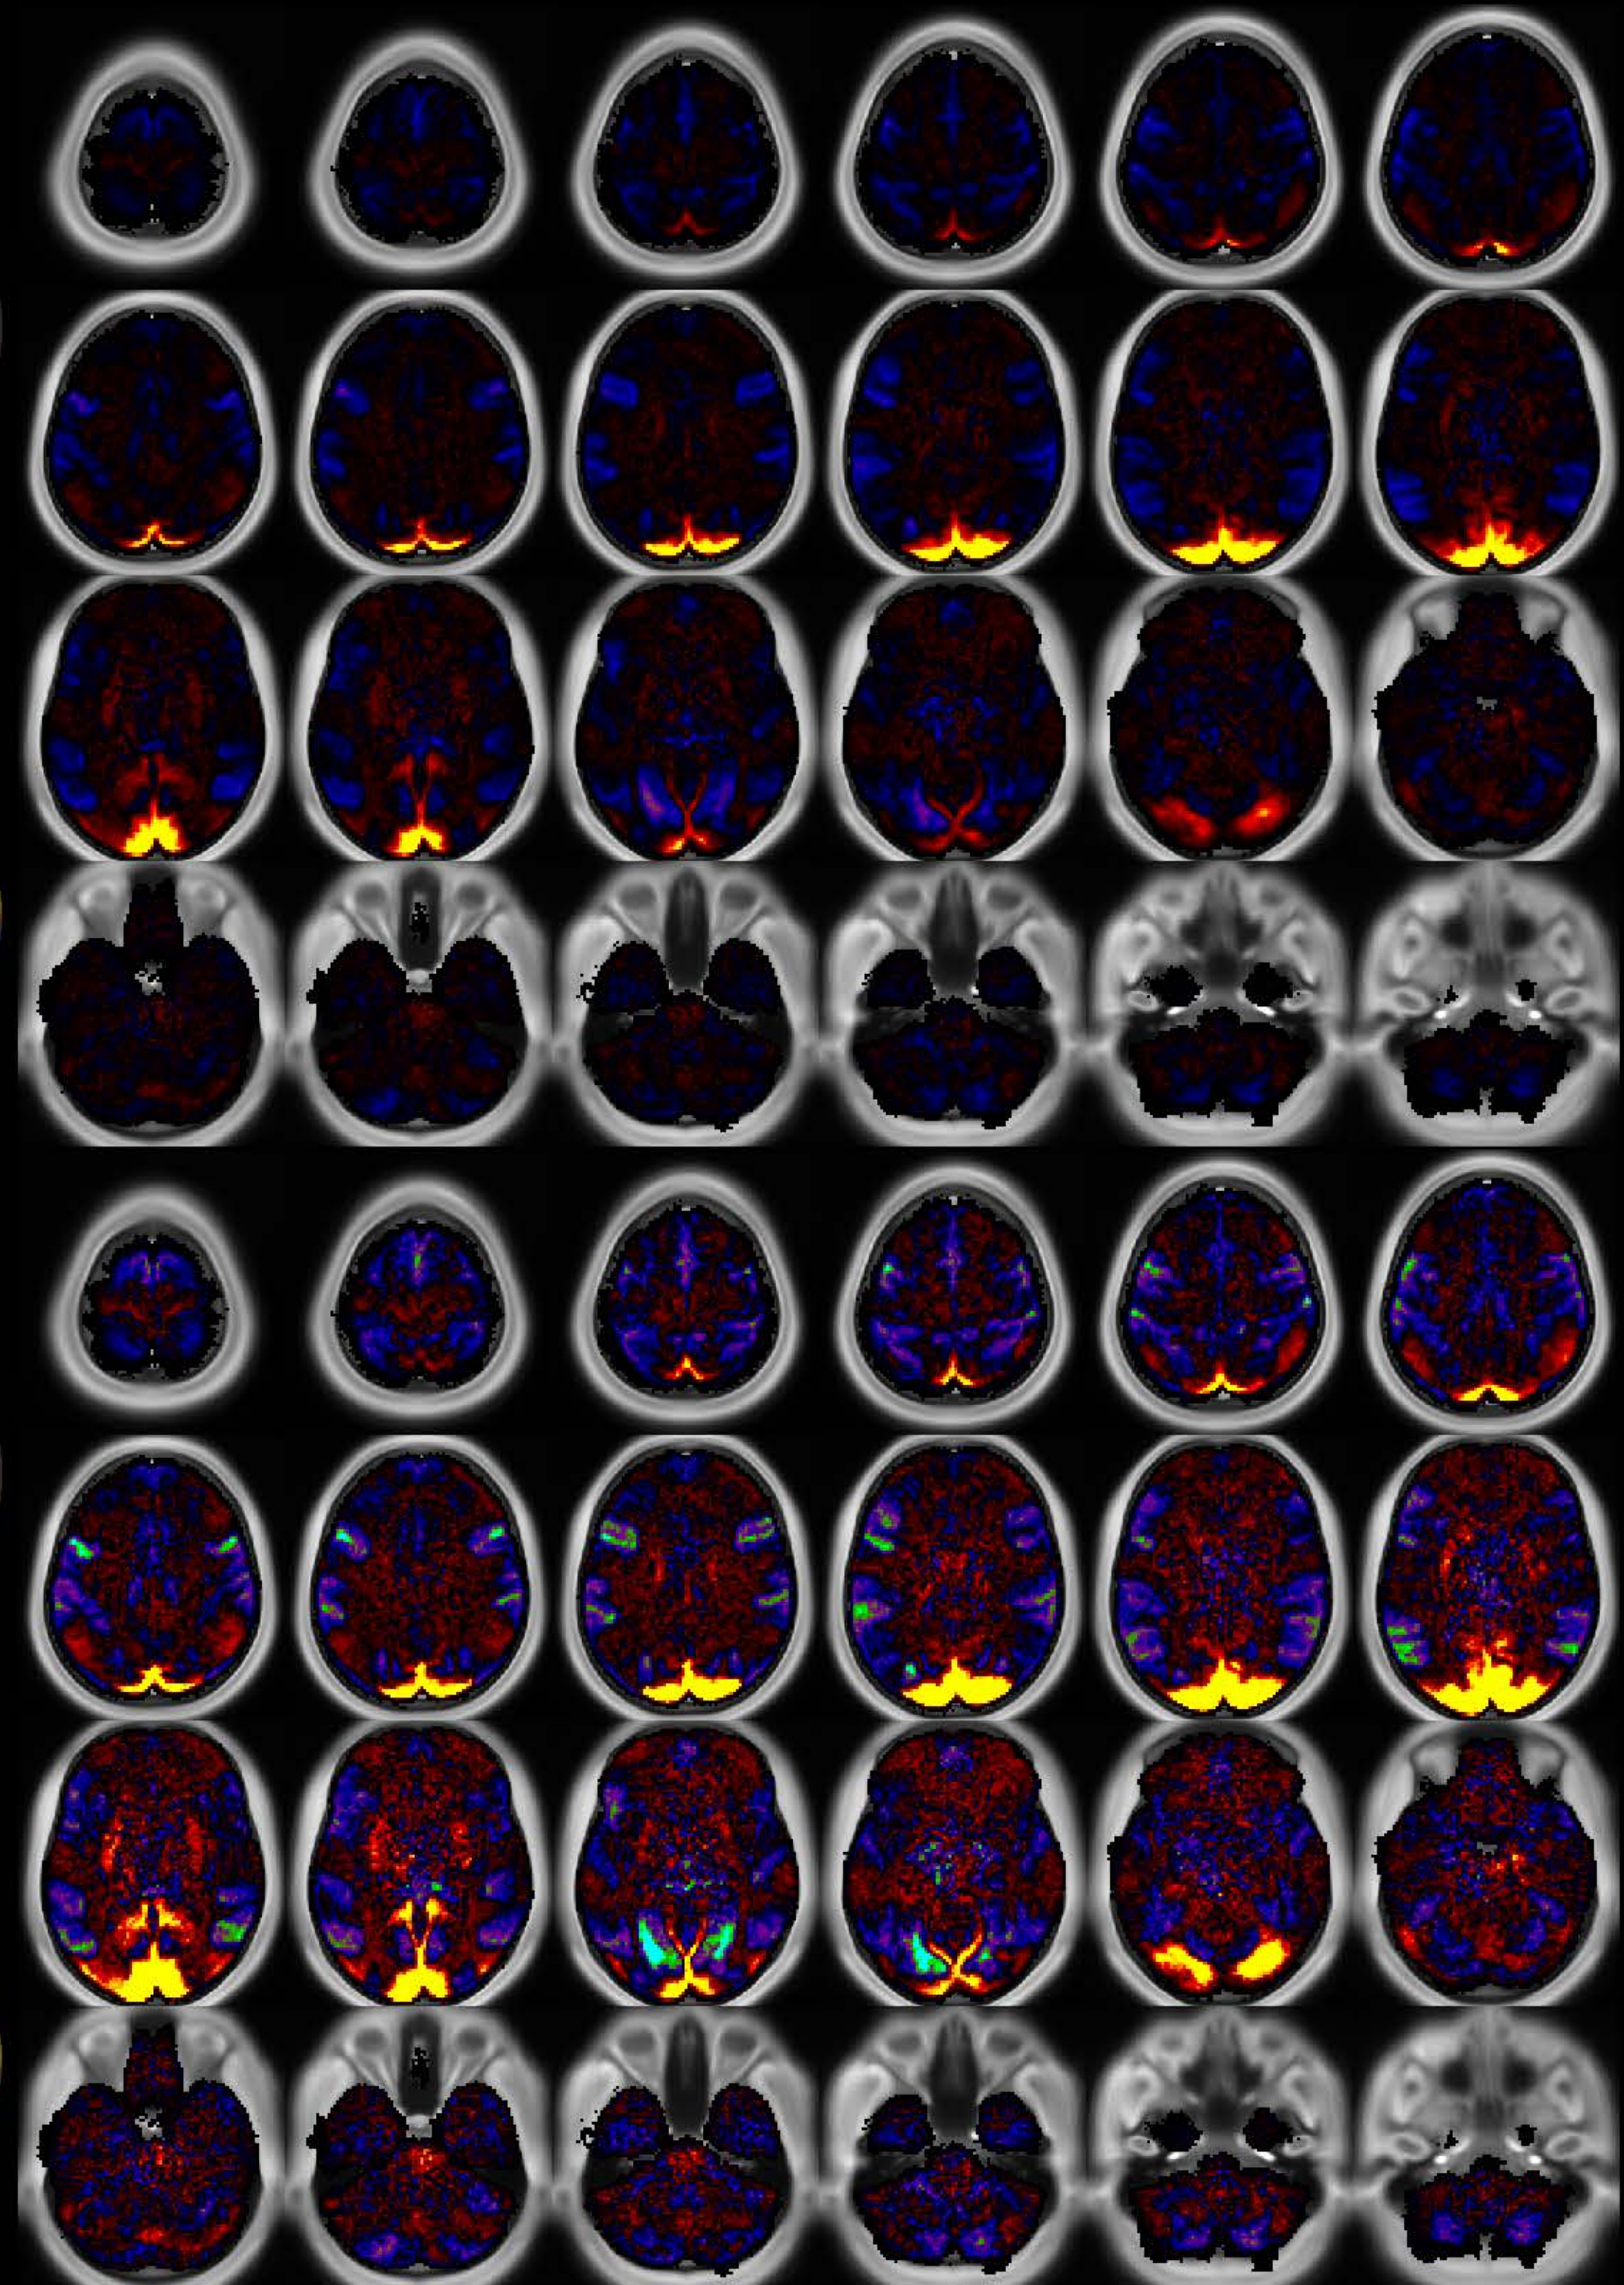

Seconds

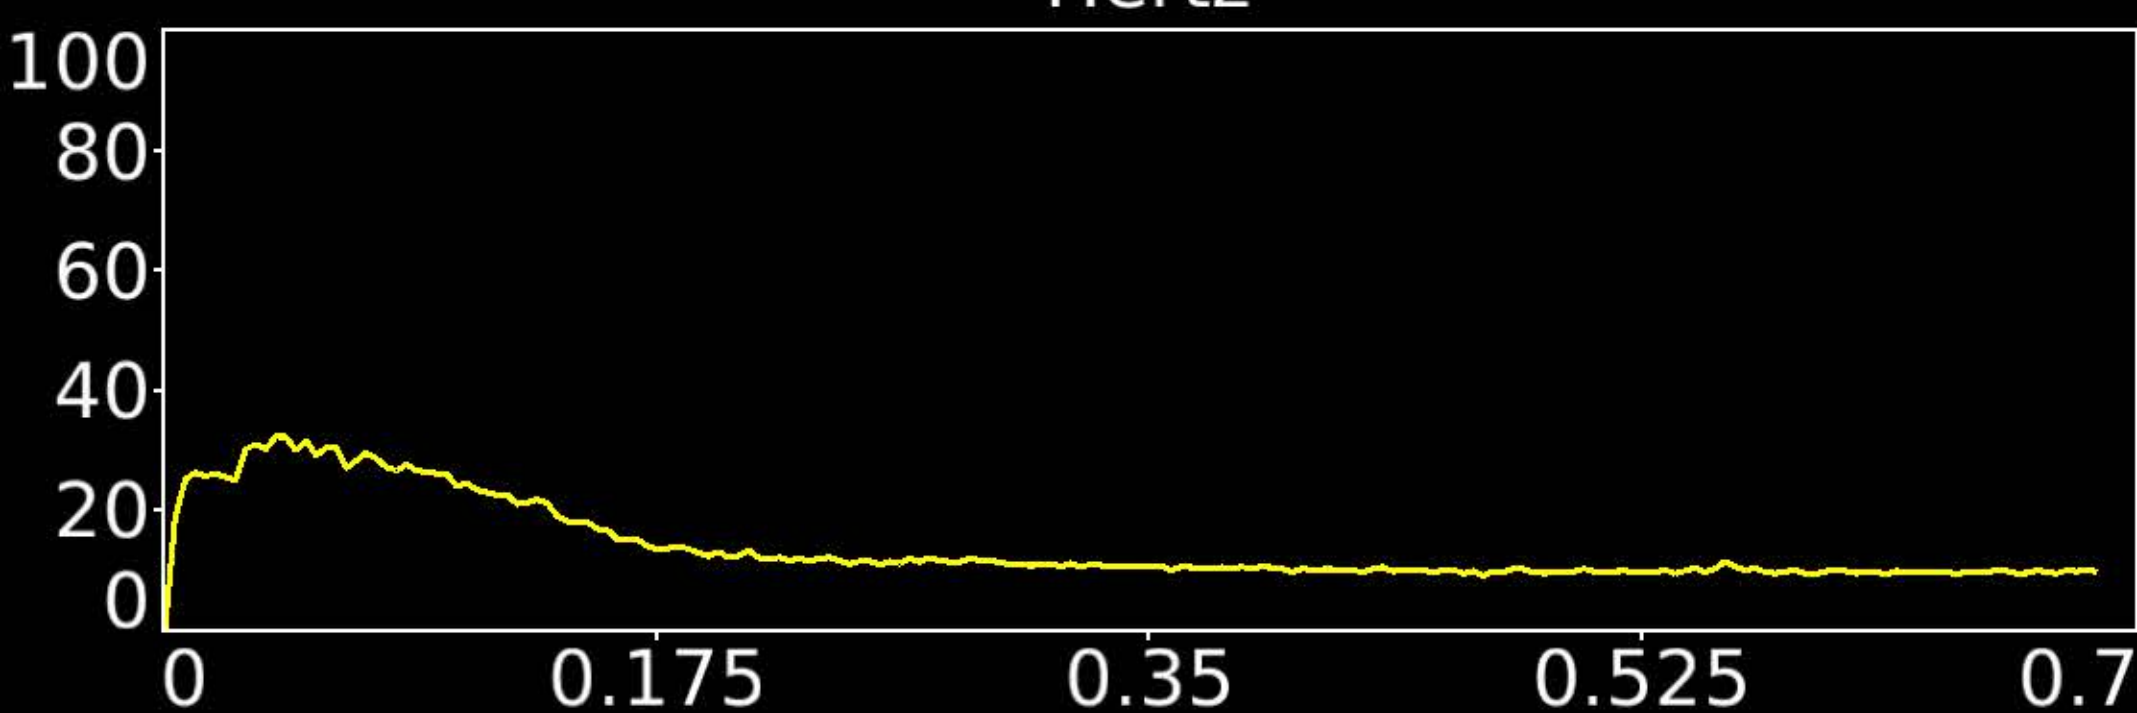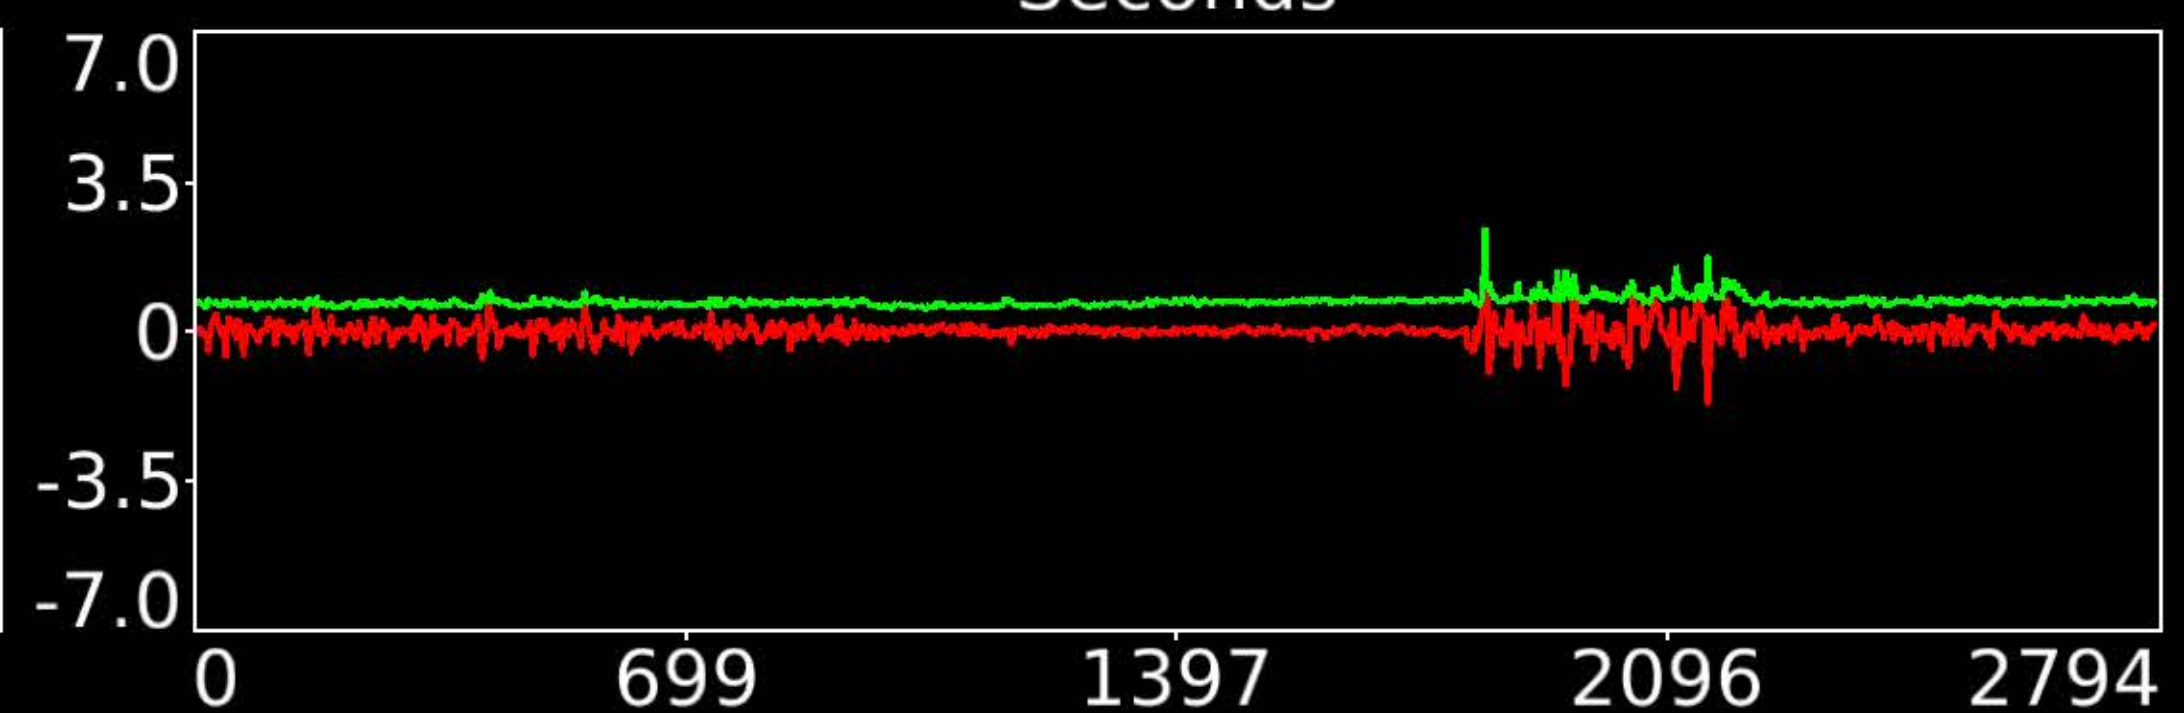

|                                                                                                                                   |                            |                                                |  |
|-----------------------------------------------------------------------------------------------------------------------------------|----------------------------|------------------------------------------------|--|
| Number & Class: 49 Signal                                                                                                         |                            | Name: Visuotopic: Paracentral Dorsal > Ventral |  |
| RVT Correlated: No                                                                                                                | DVARS Dip Associated: No   | Cross-Subject Variable: No                     |  |
| Single Subject: No                                                                                                                | % Variance Explained: 0.93 | Globality Index: 0.09                          |  |
| Task Component: 67                                                                                                                | Rest Component: 42+82      | Task Modulated: Social                         |  |
| Rationale: Spatial map includes positive and negative patches that respect known retinotopic visual organization (Lower vs Upper) |                            |                                                |  |



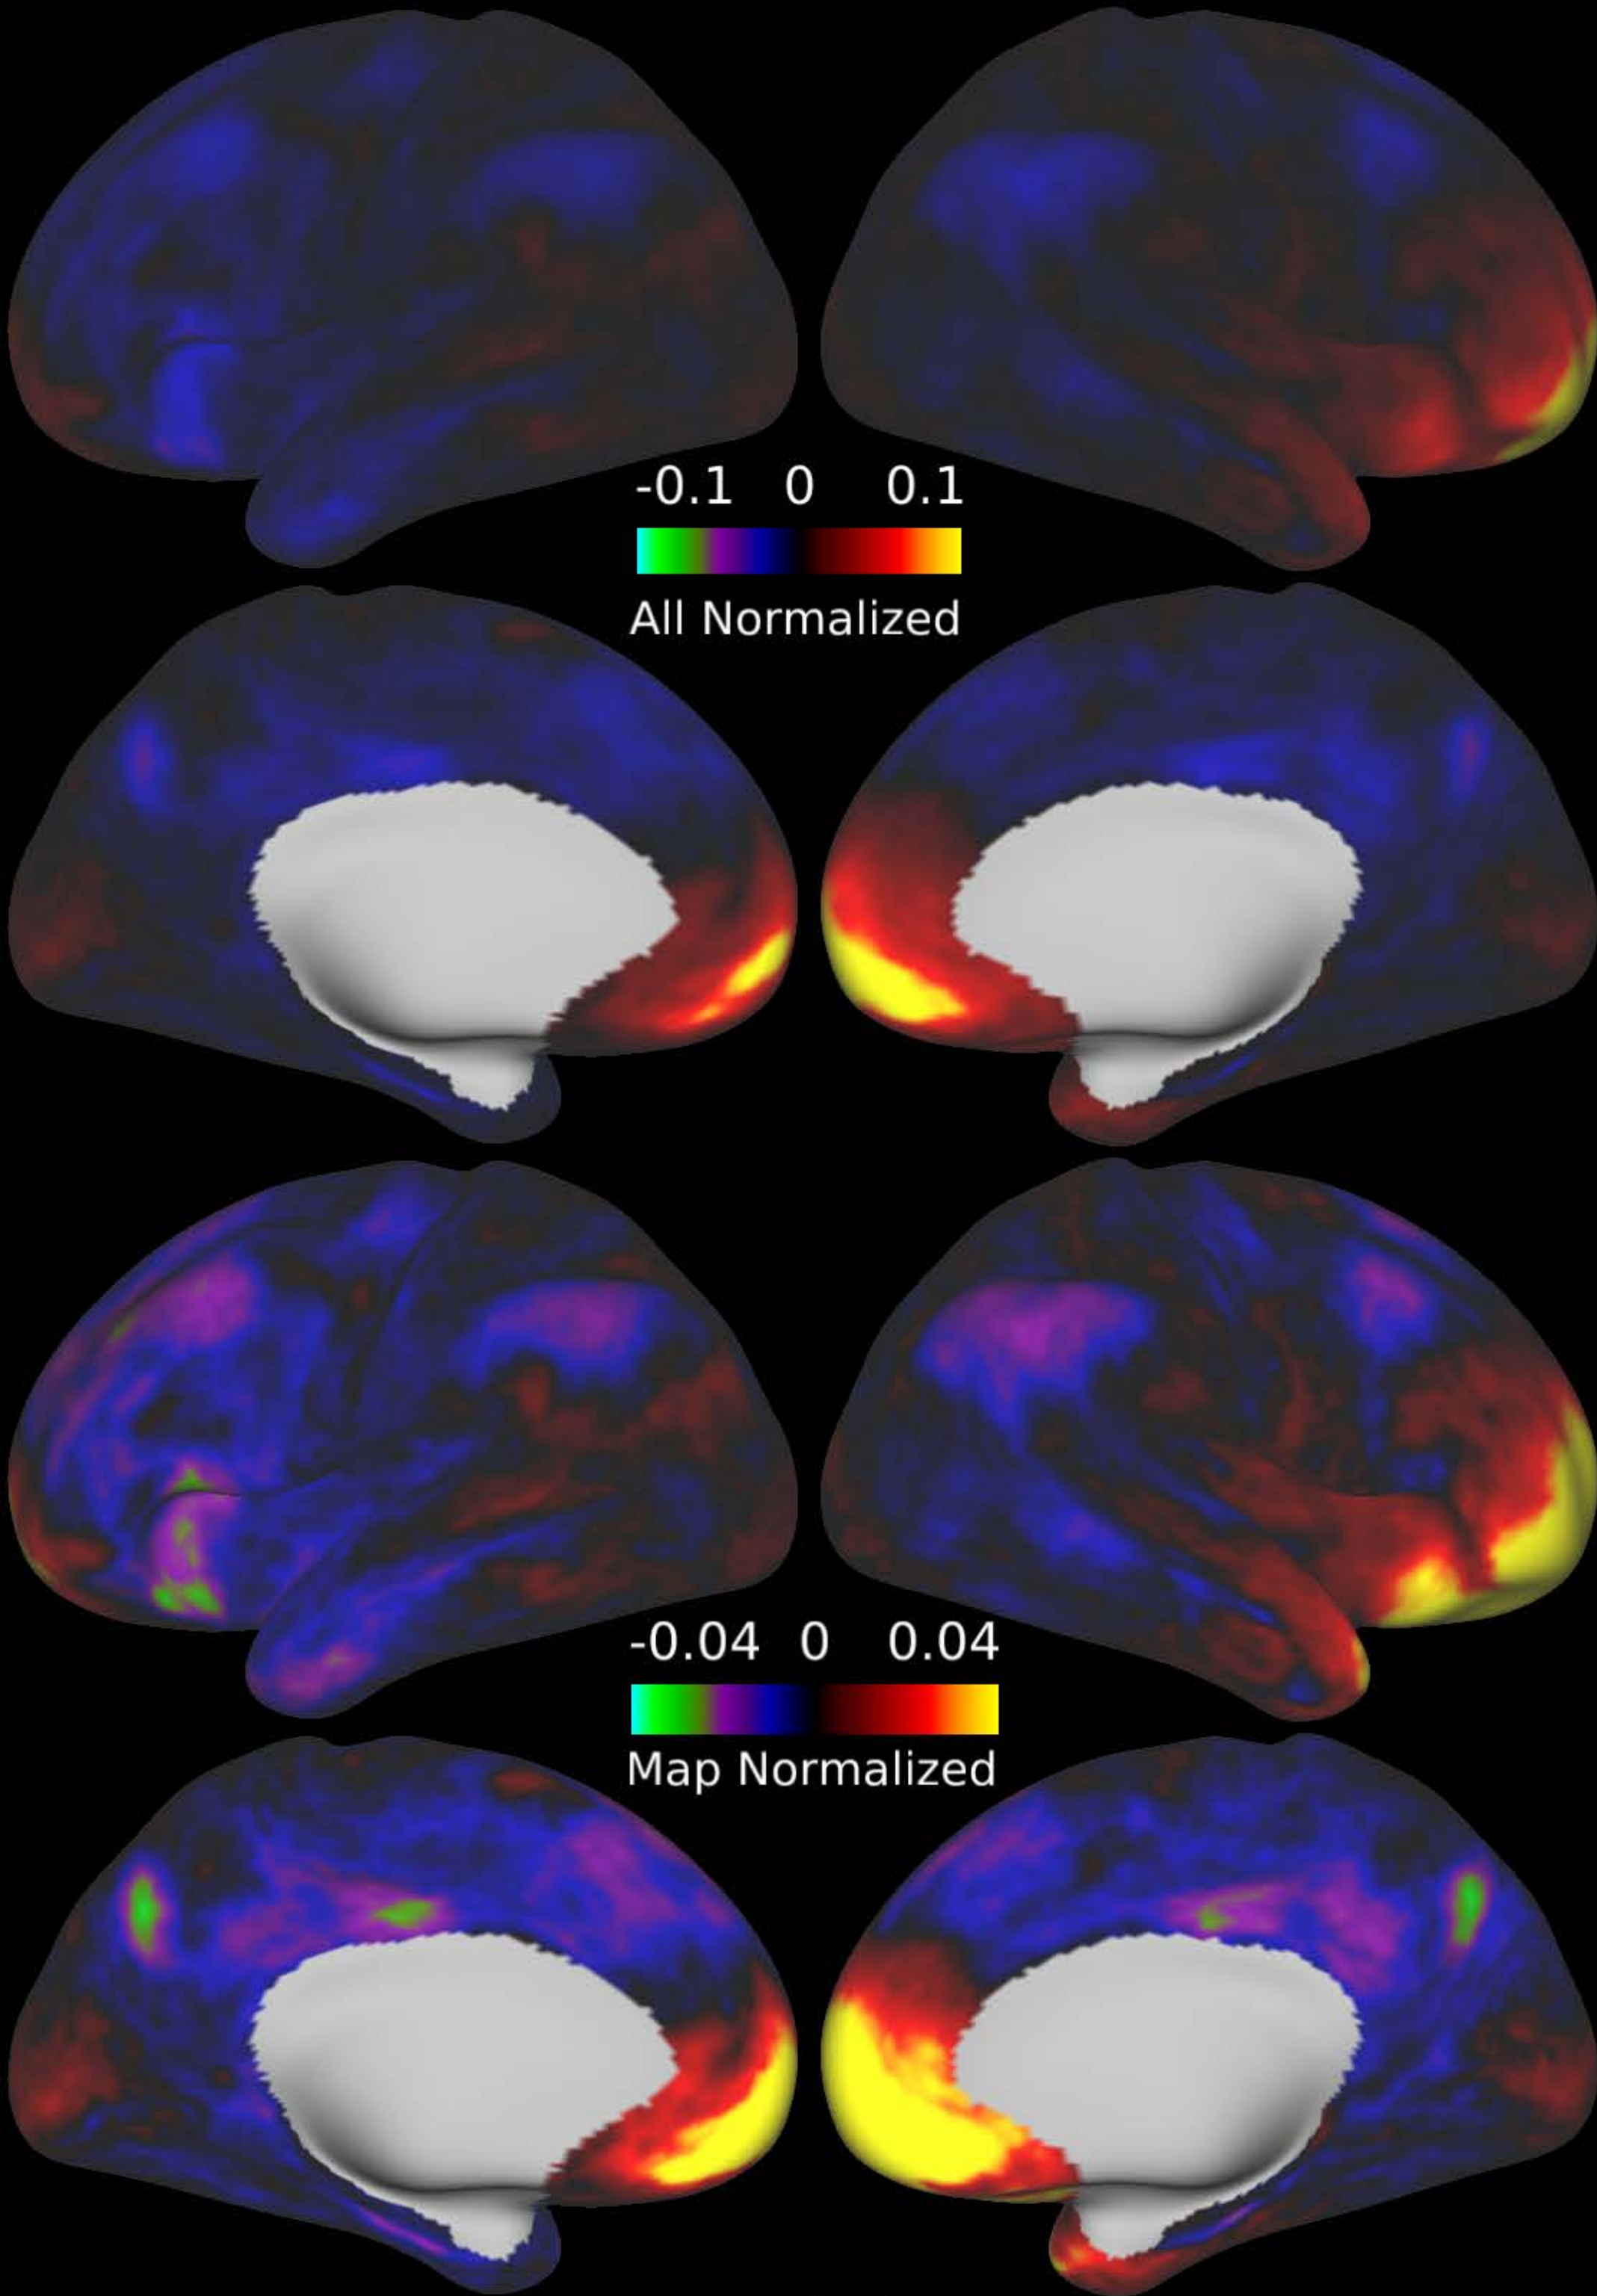

Hertz

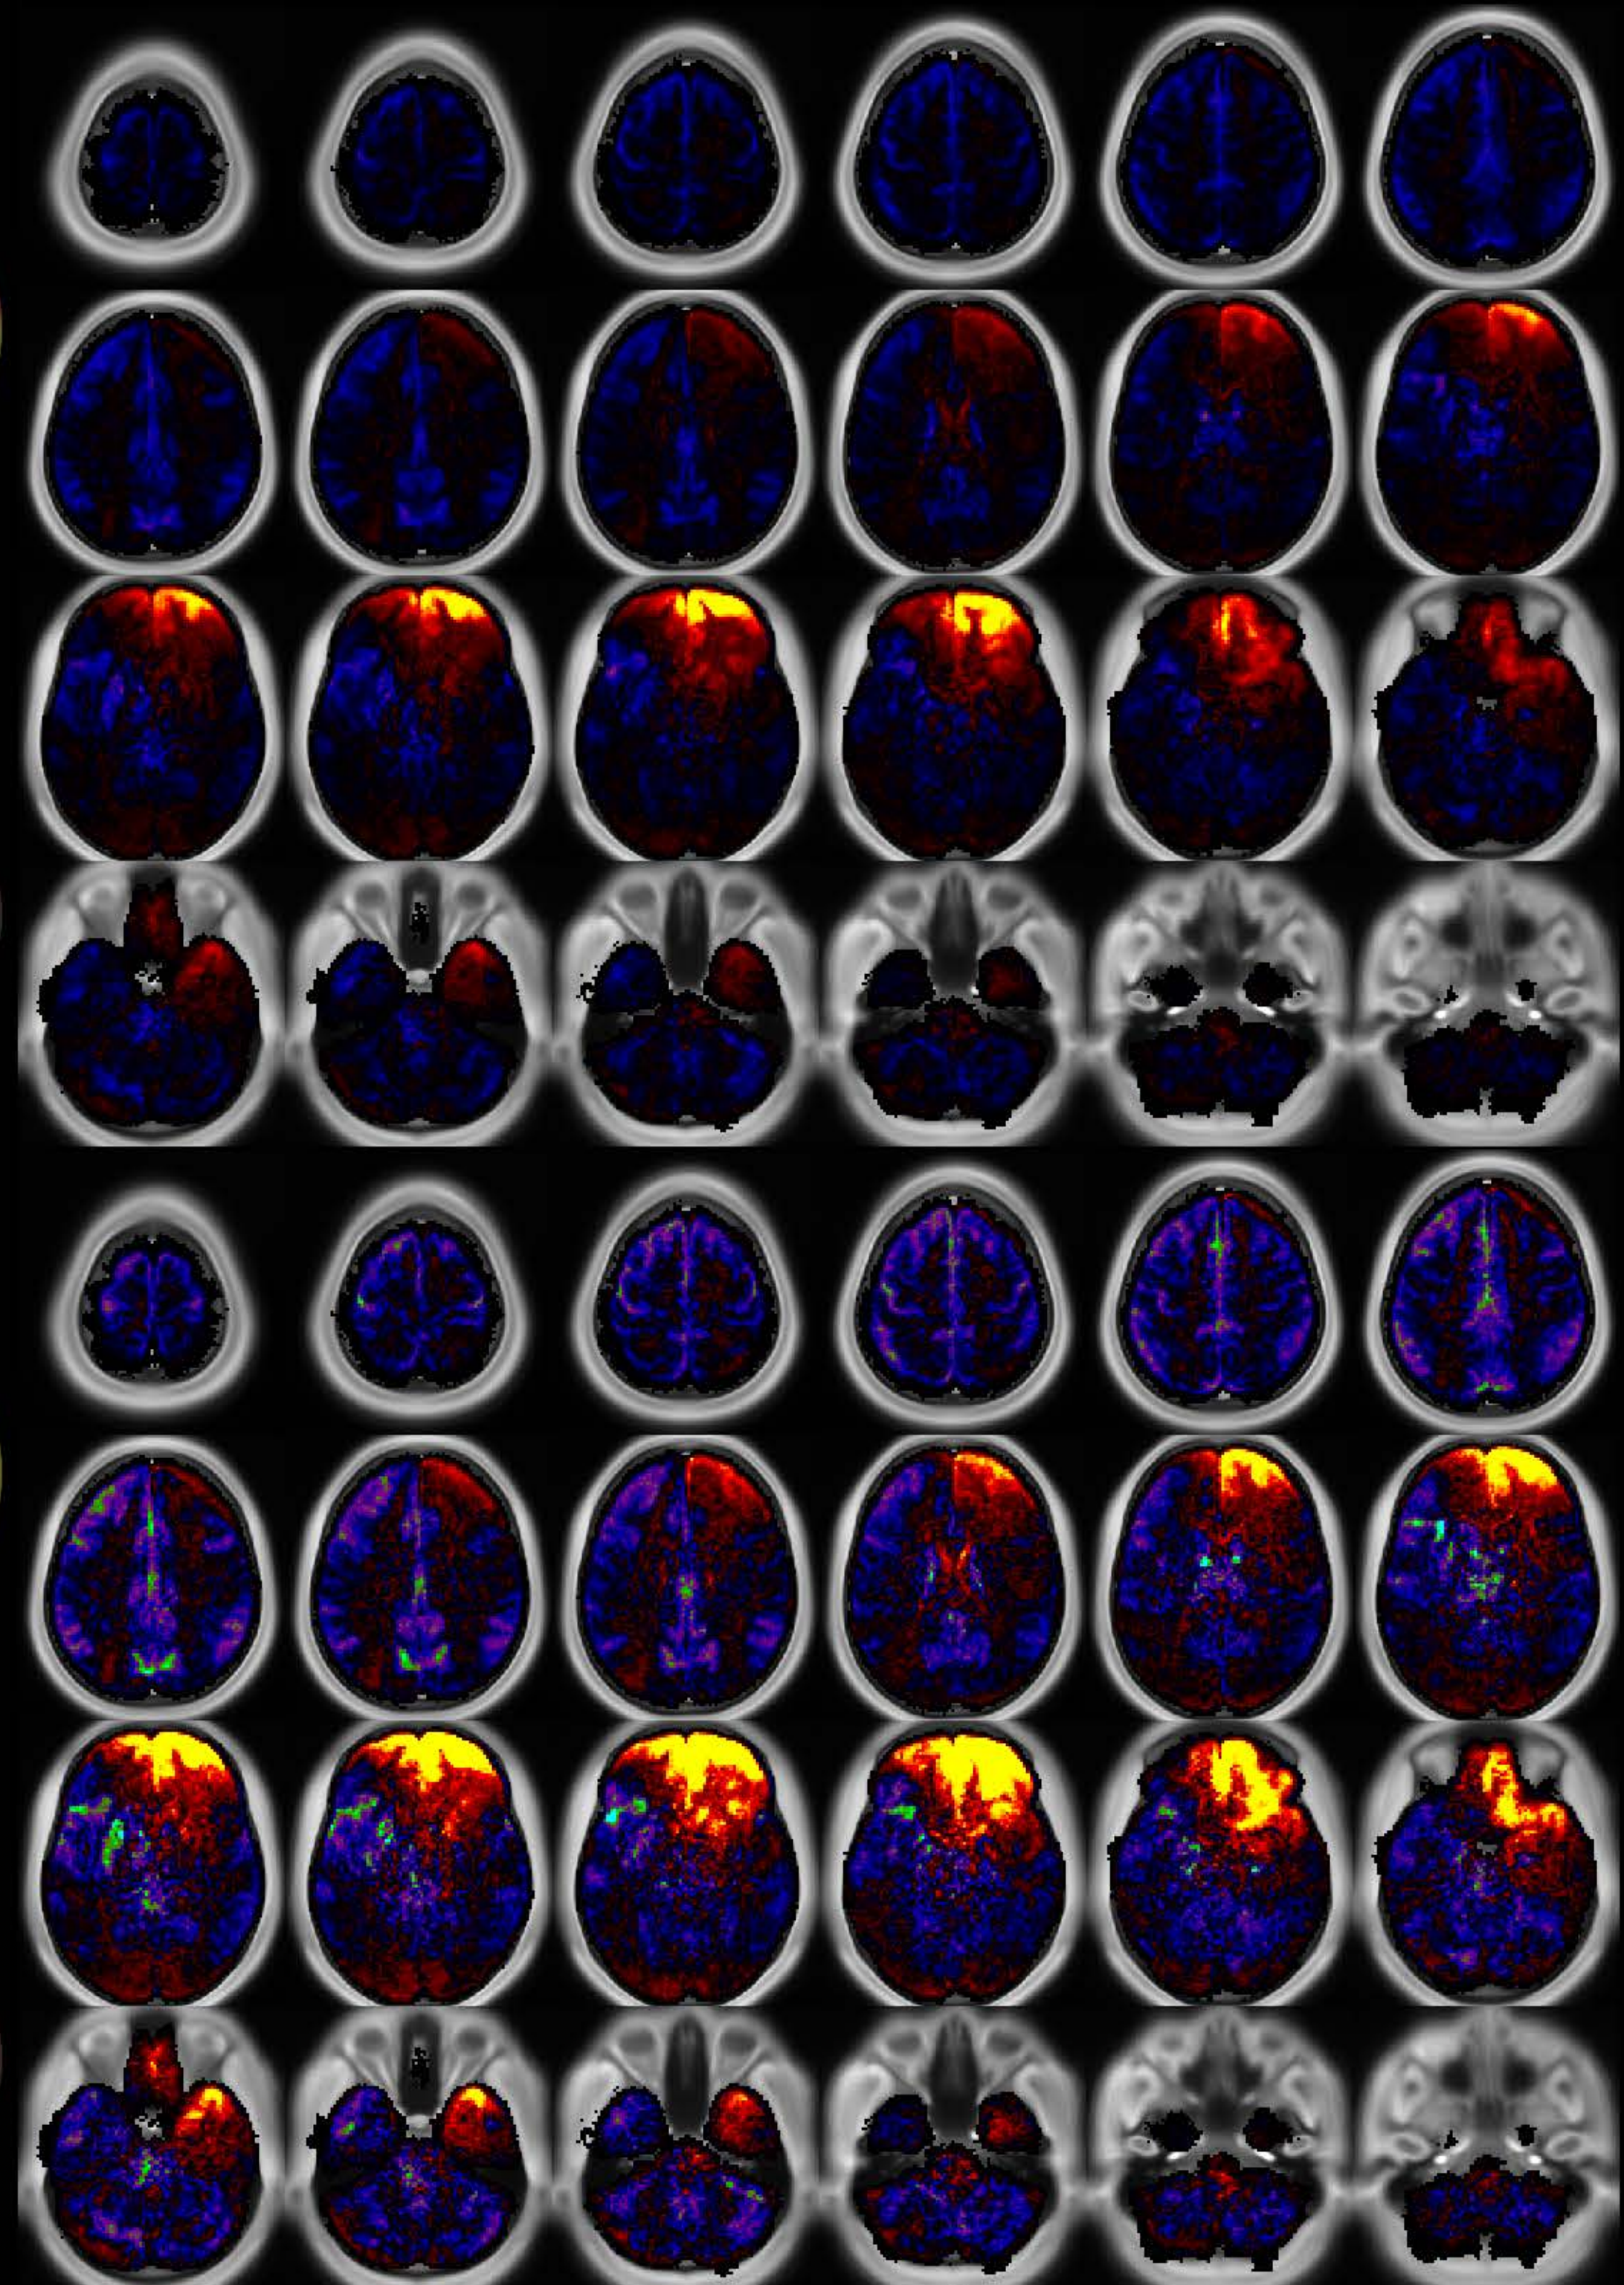

Seconds

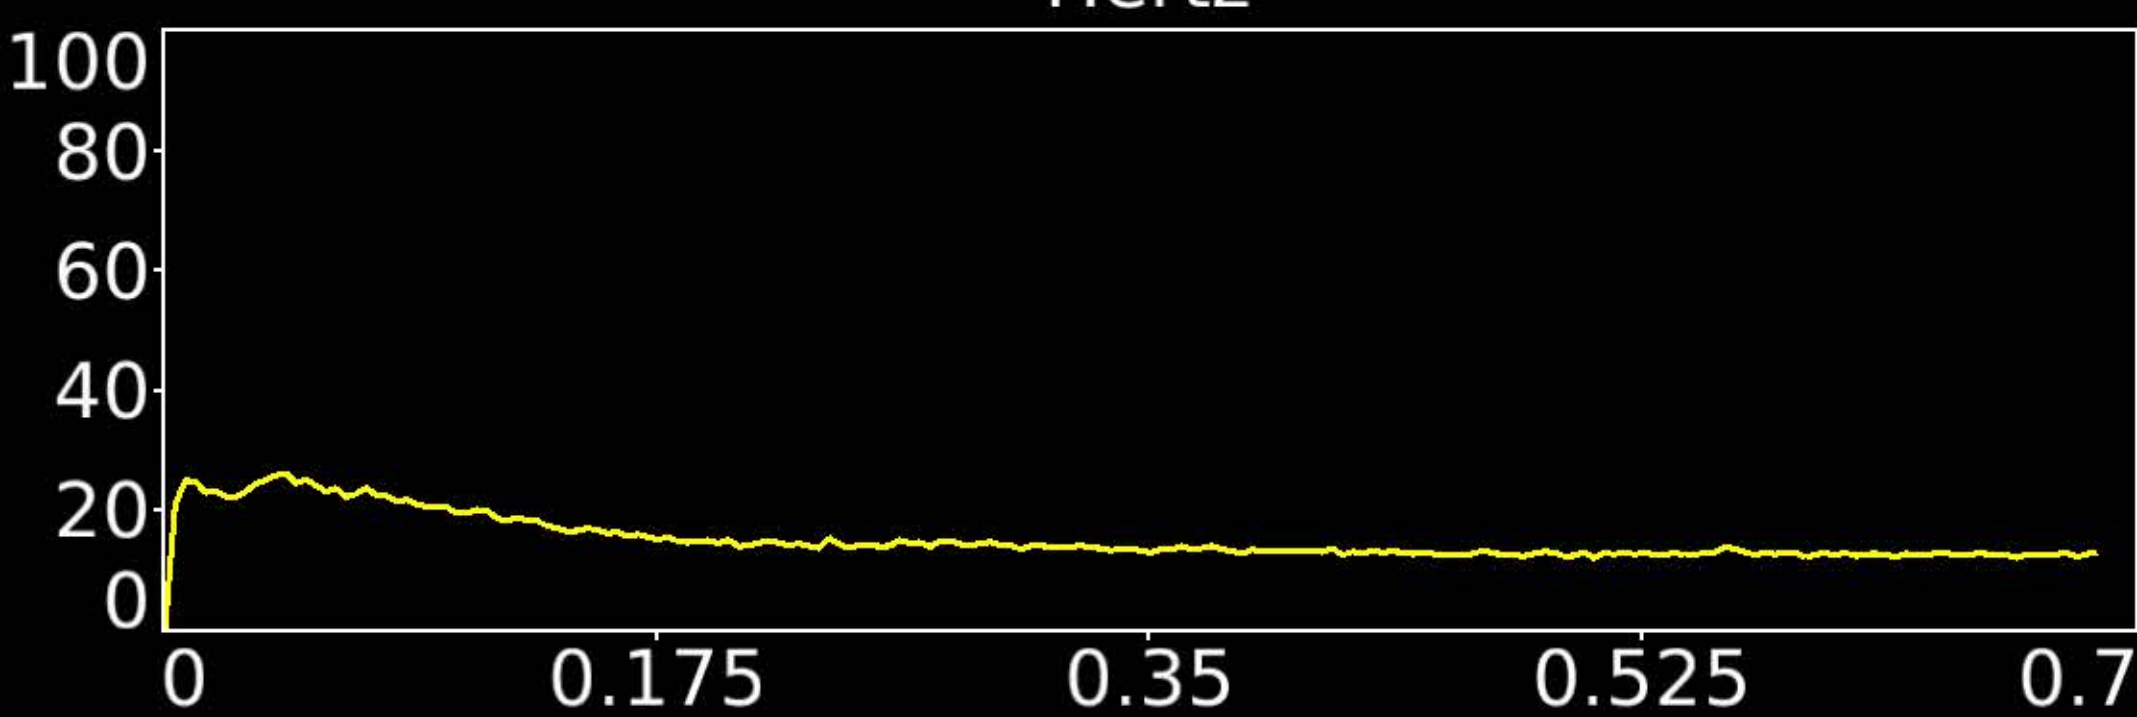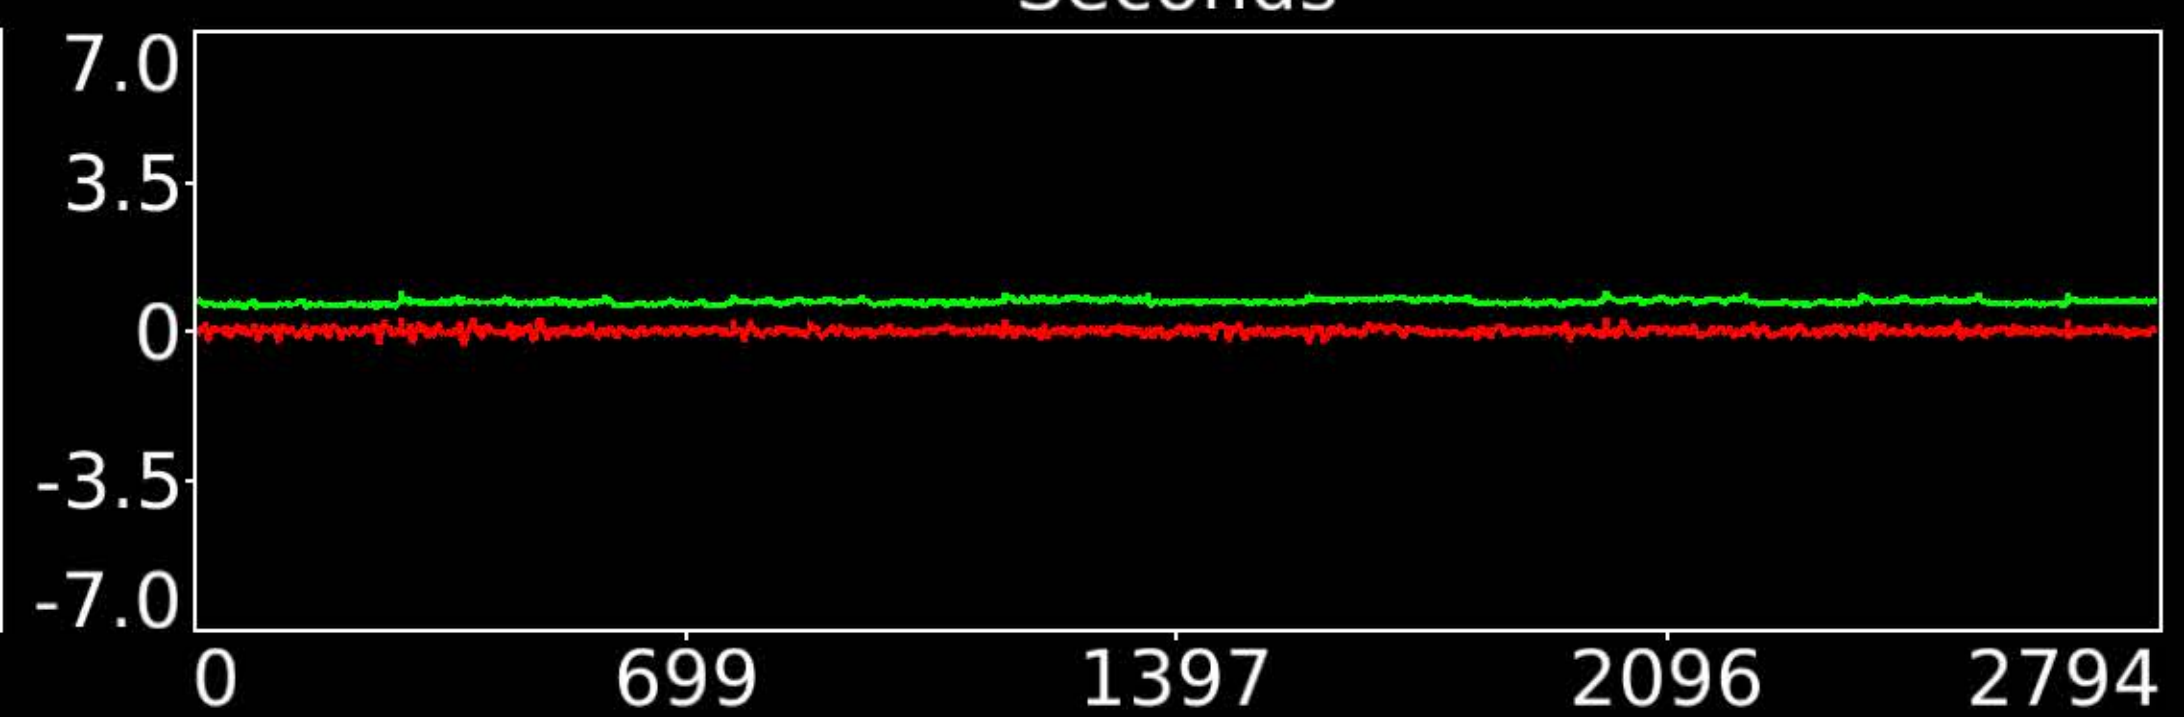

|                                       |                            |                            |  |
|---------------------------------------|----------------------------|----------------------------|--|
| Number & Class: 50 Noise              |                            | Name: Coil                 |  |
| RVT Correlated: No                    | DVARS Dip Associated: Yes  | Cross-Subject Variable: No |  |
| Single Subject: No                    | % Variance Explained: 0.92 | Globality Index: 1.19      |  |
| Task Component: 50                    | Rest Component: 47         | Task Modulated: No         |  |
| Rationale: Known coil noise component |                            |                            |  |



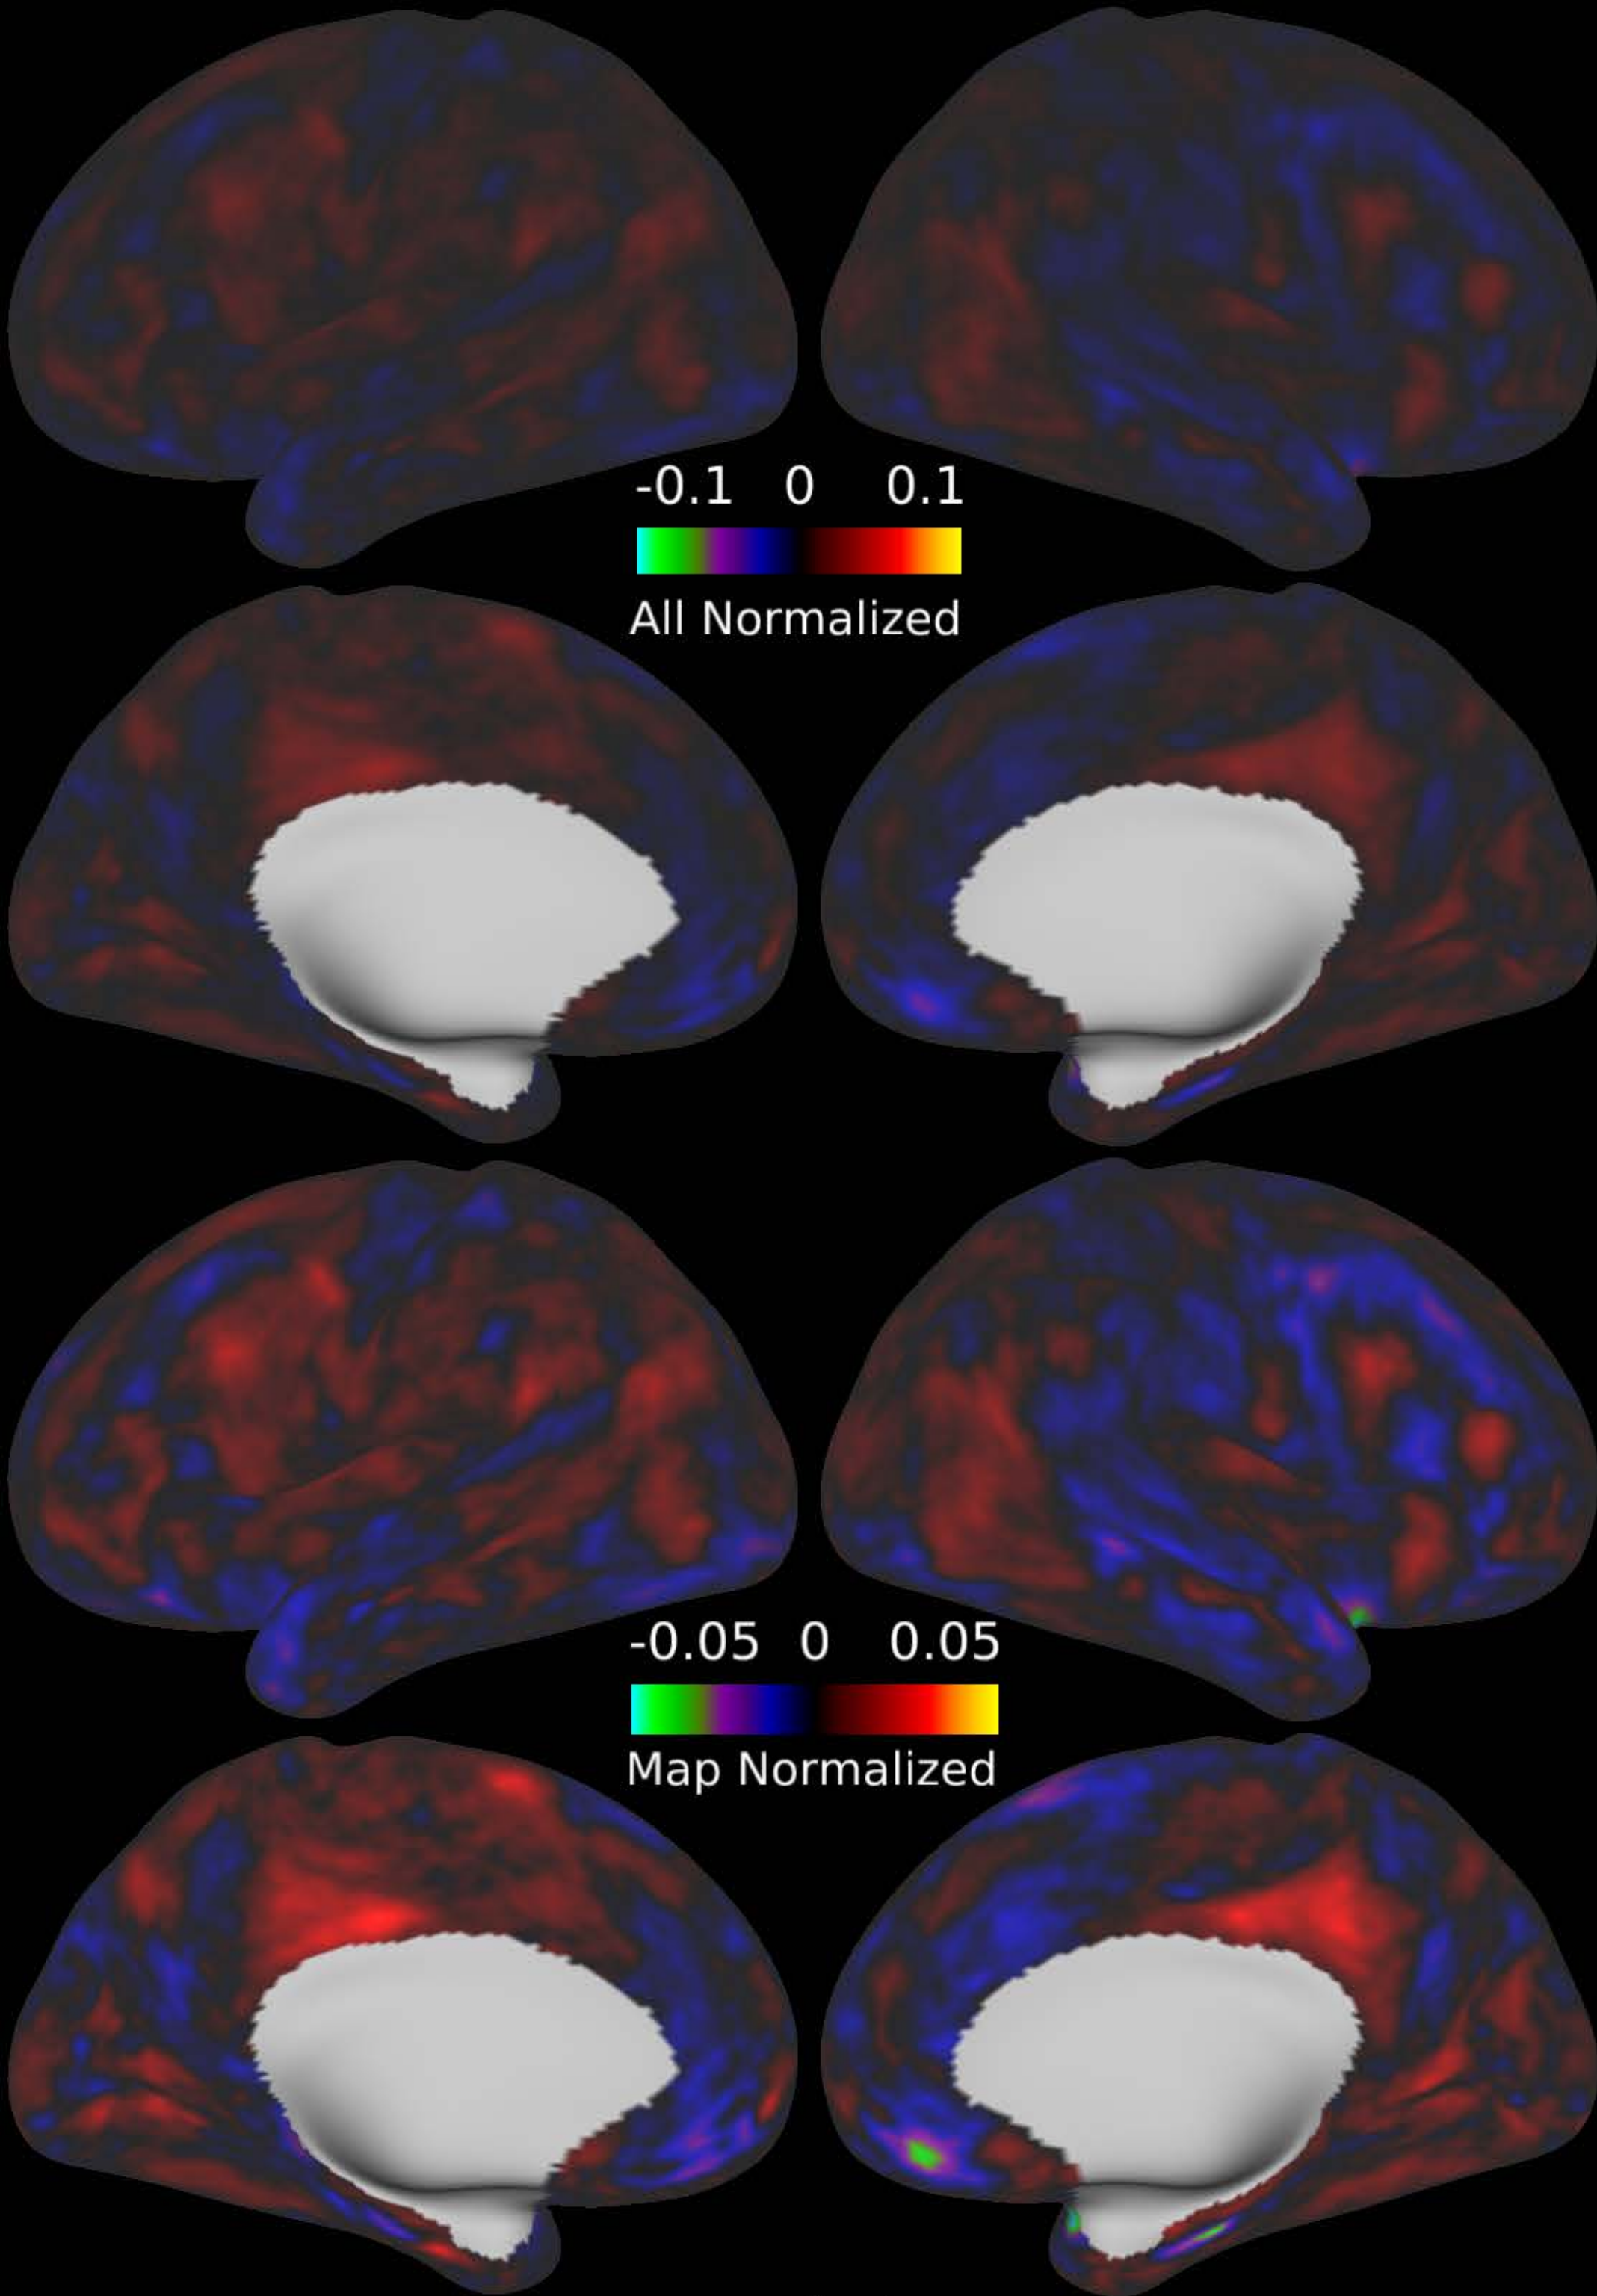

Hertz

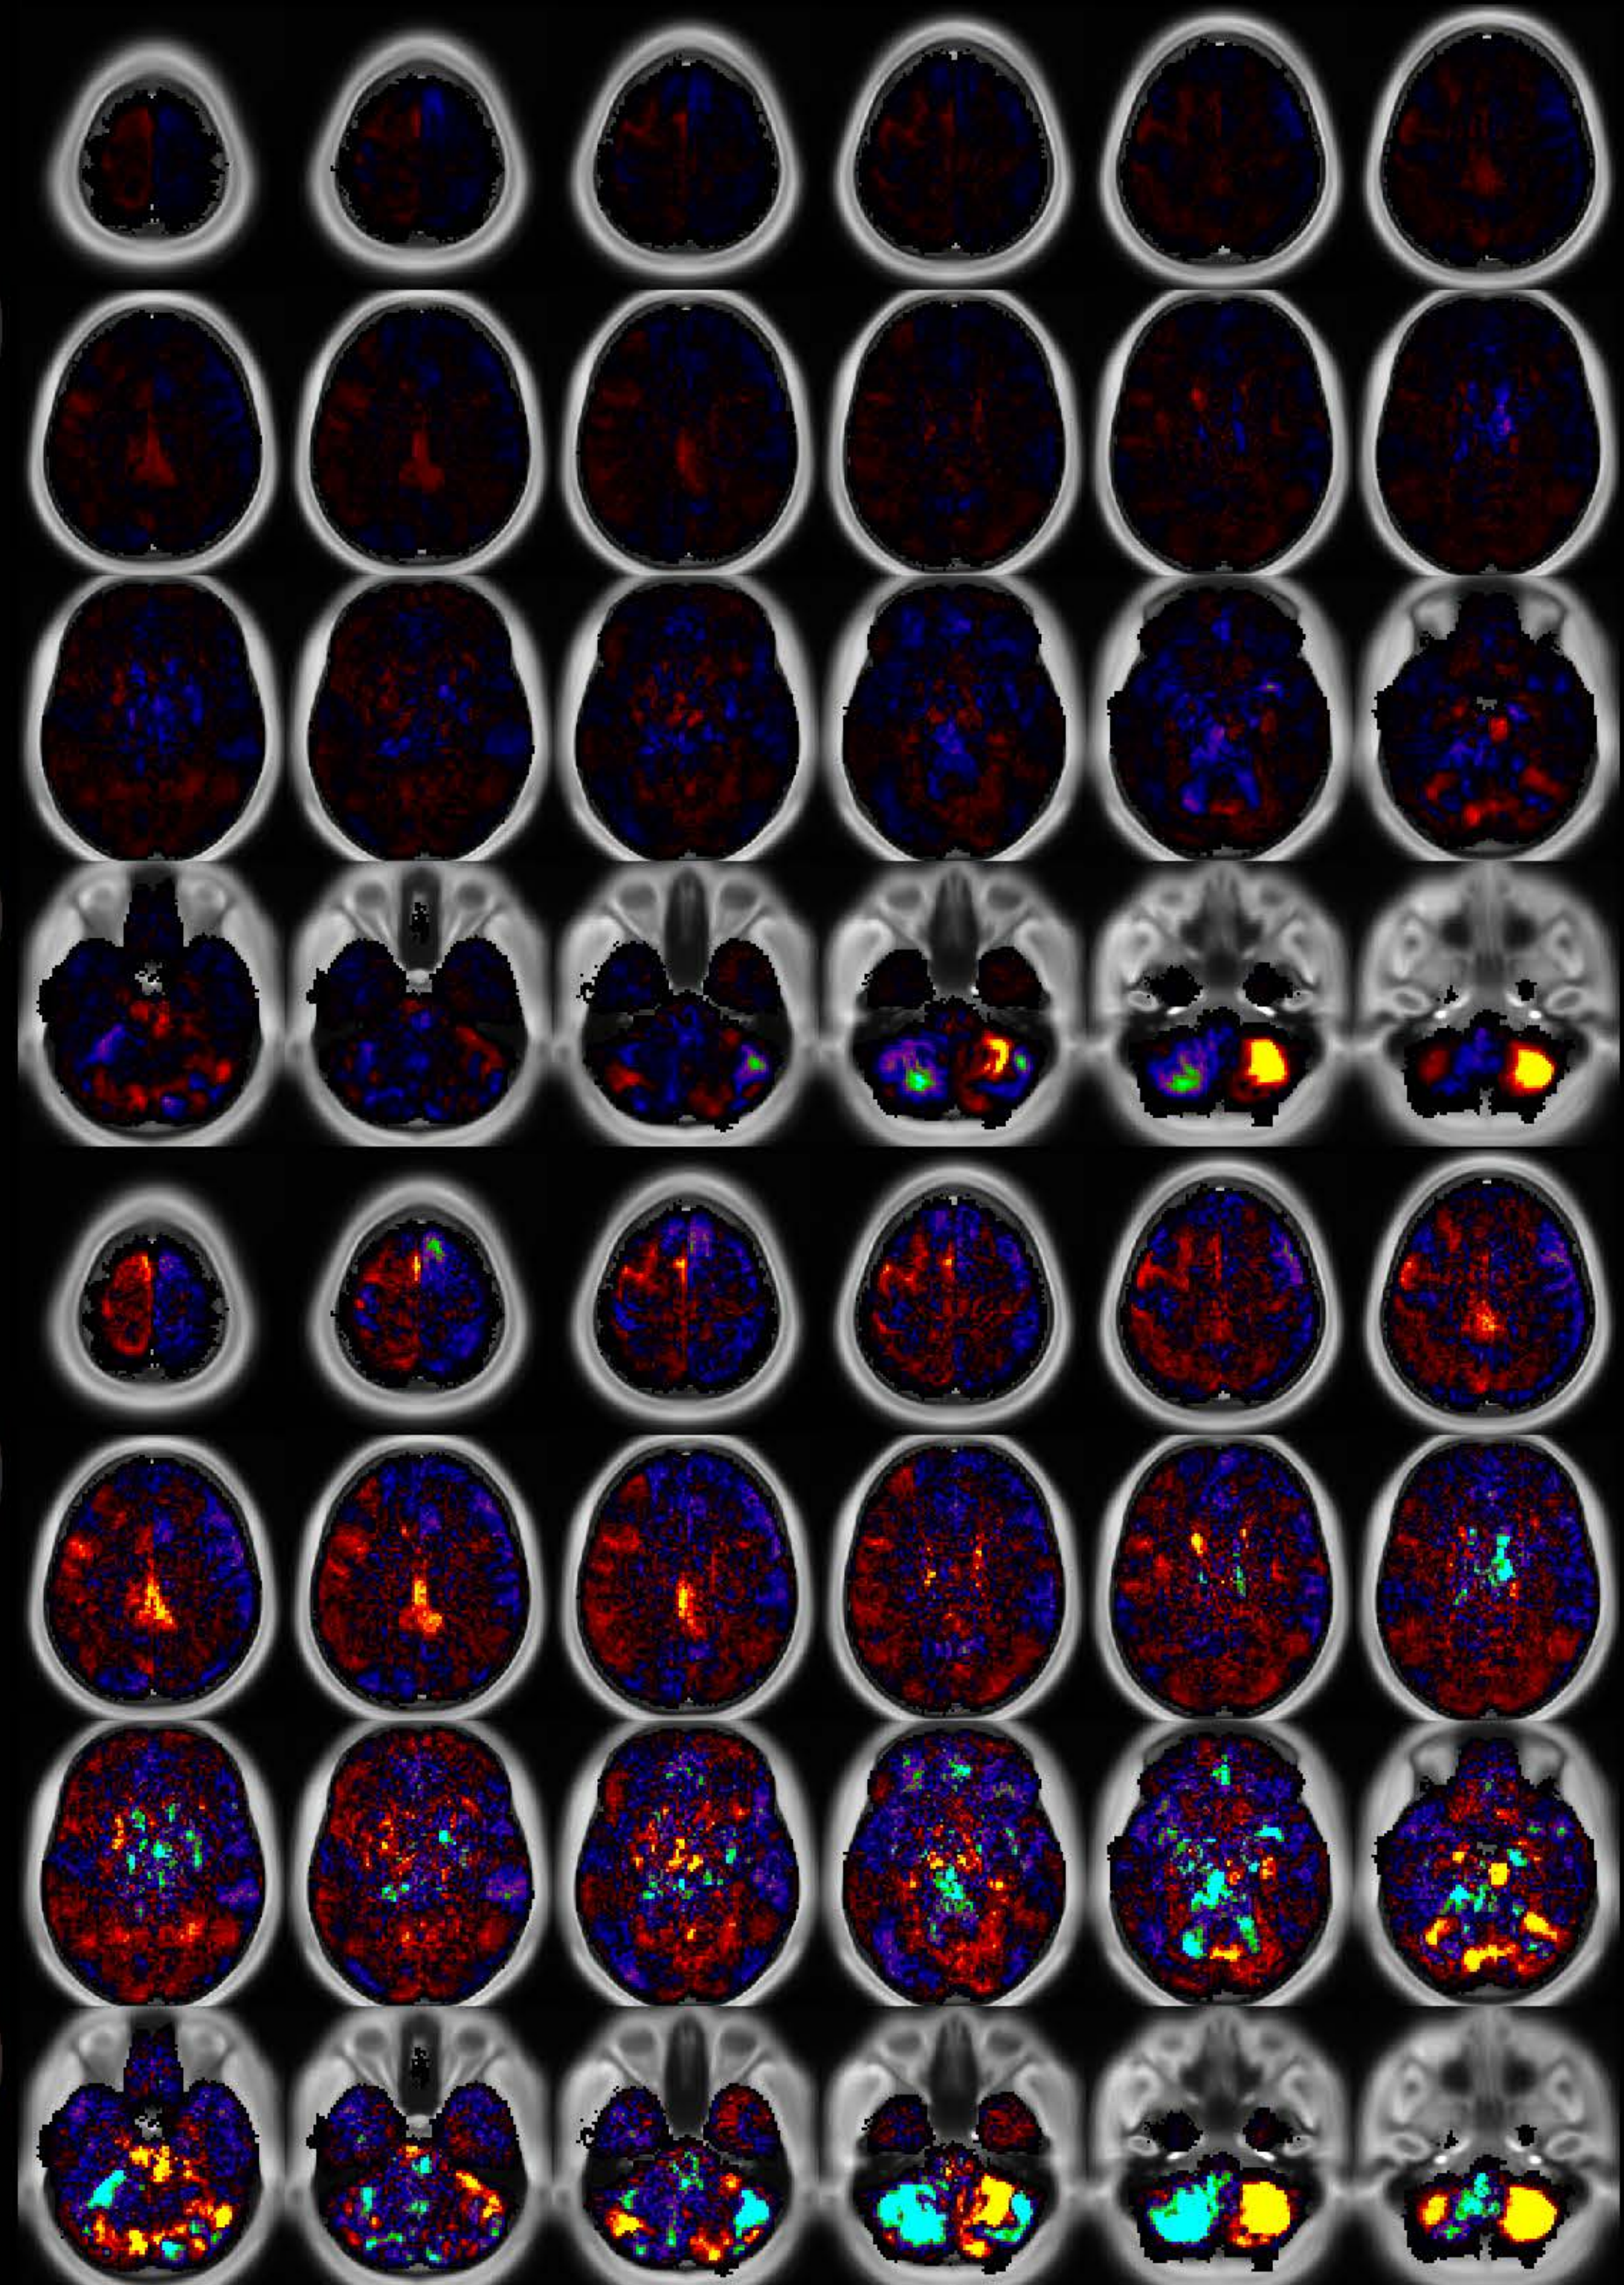

Seconds

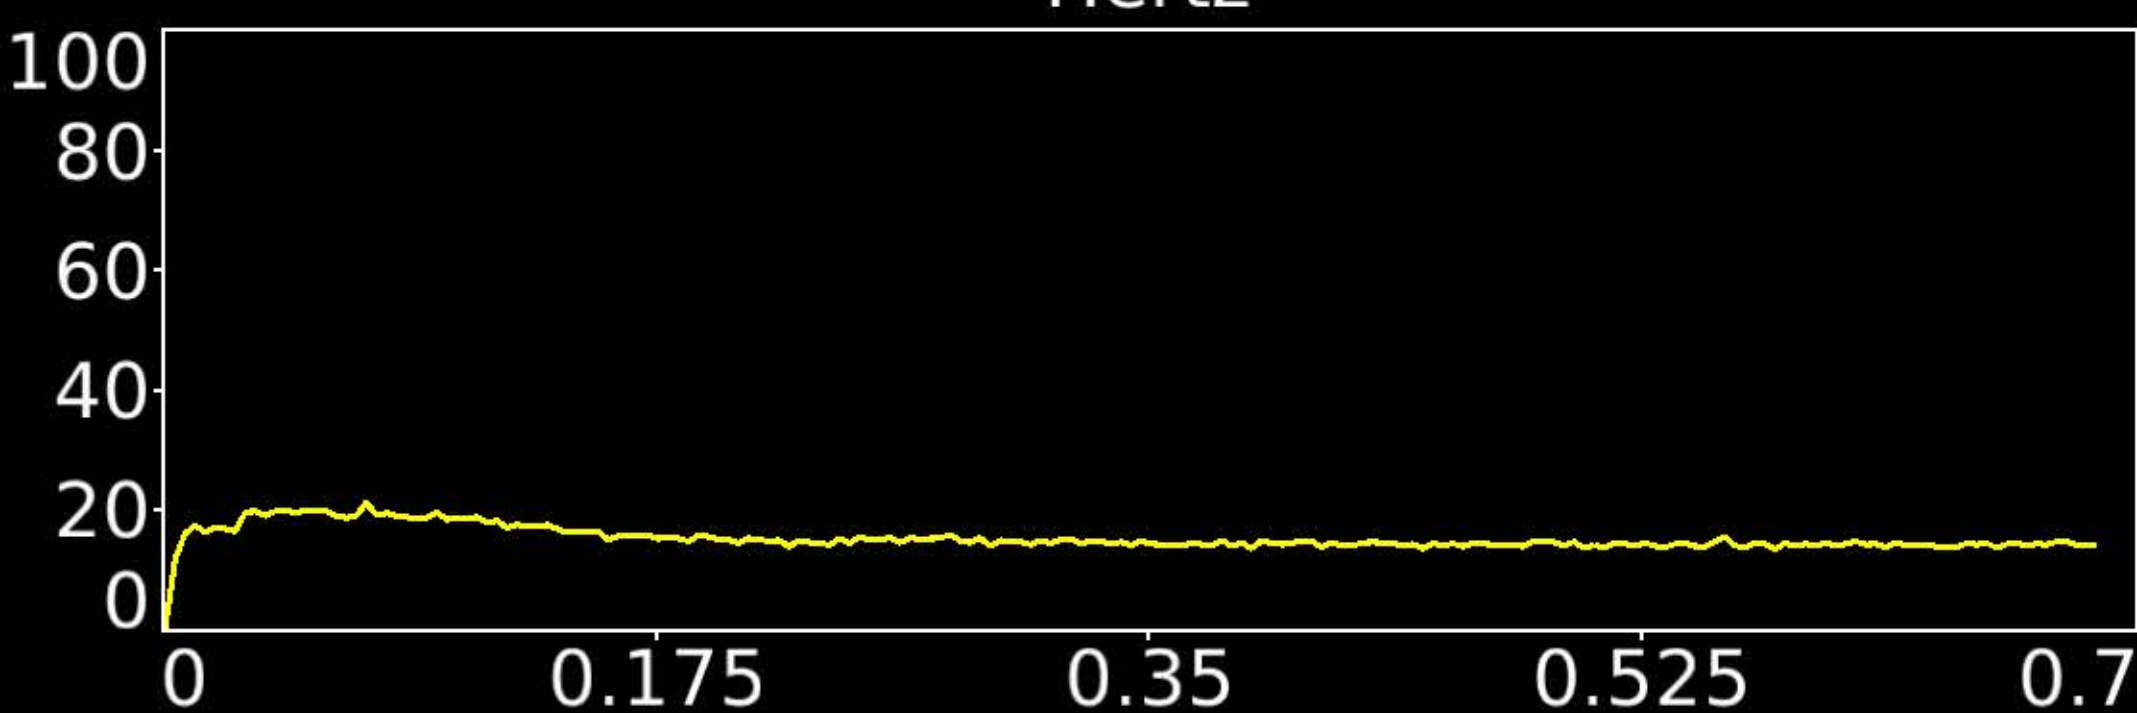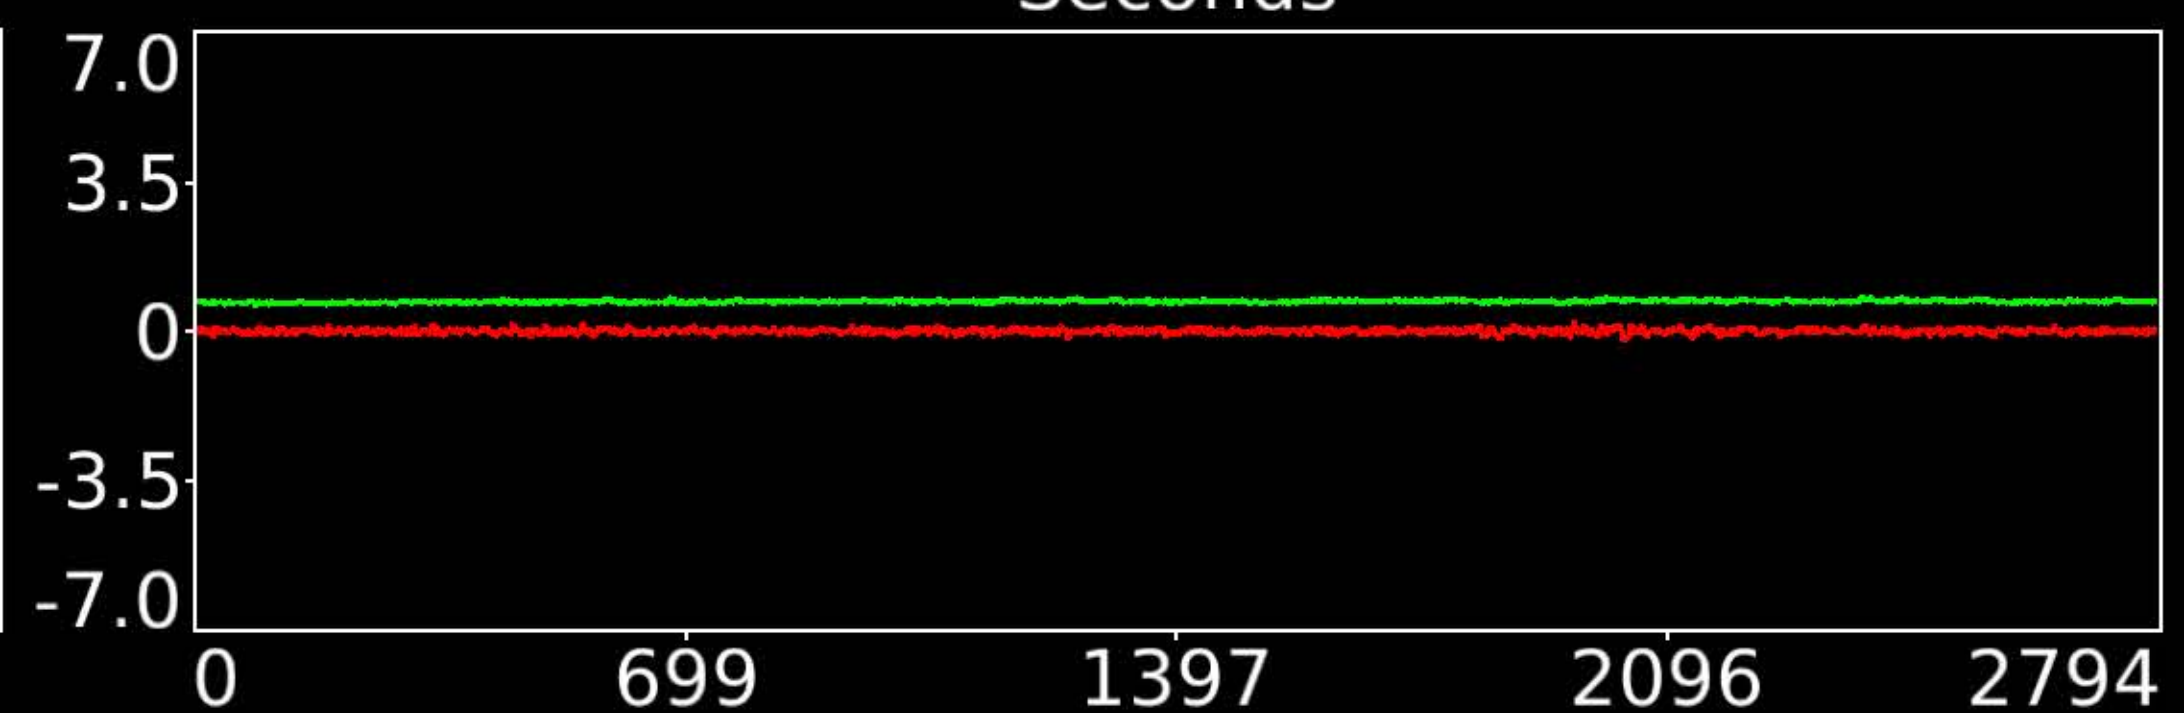

|                                                                                                                         |                            |                                                     |  |
|-------------------------------------------------------------------------------------------------------------------------|----------------------------|-----------------------------------------------------|--|
| Number & Class: 51 Noise                                                                                                |                            | Name: R Inferior Cerebellum > L Inferior Cerebellum |  |
| RVT Correlated: No                                                                                                      | DVARS Dip Associated: No   | Cross-Subject Variable: No                          |  |
| Single Subject: Yes                                                                                                     | % Variance Explained: 0.92 | Globality Index: 0.06                               |  |
| Task Component: 54                                                                                                      | Rest Component: No         | Task Modulated: No                                  |  |
| Rationale: Classified same as TC54: single subject component whose spatial map is not reflective of known RSNs or areas |                            |                                                     |  |



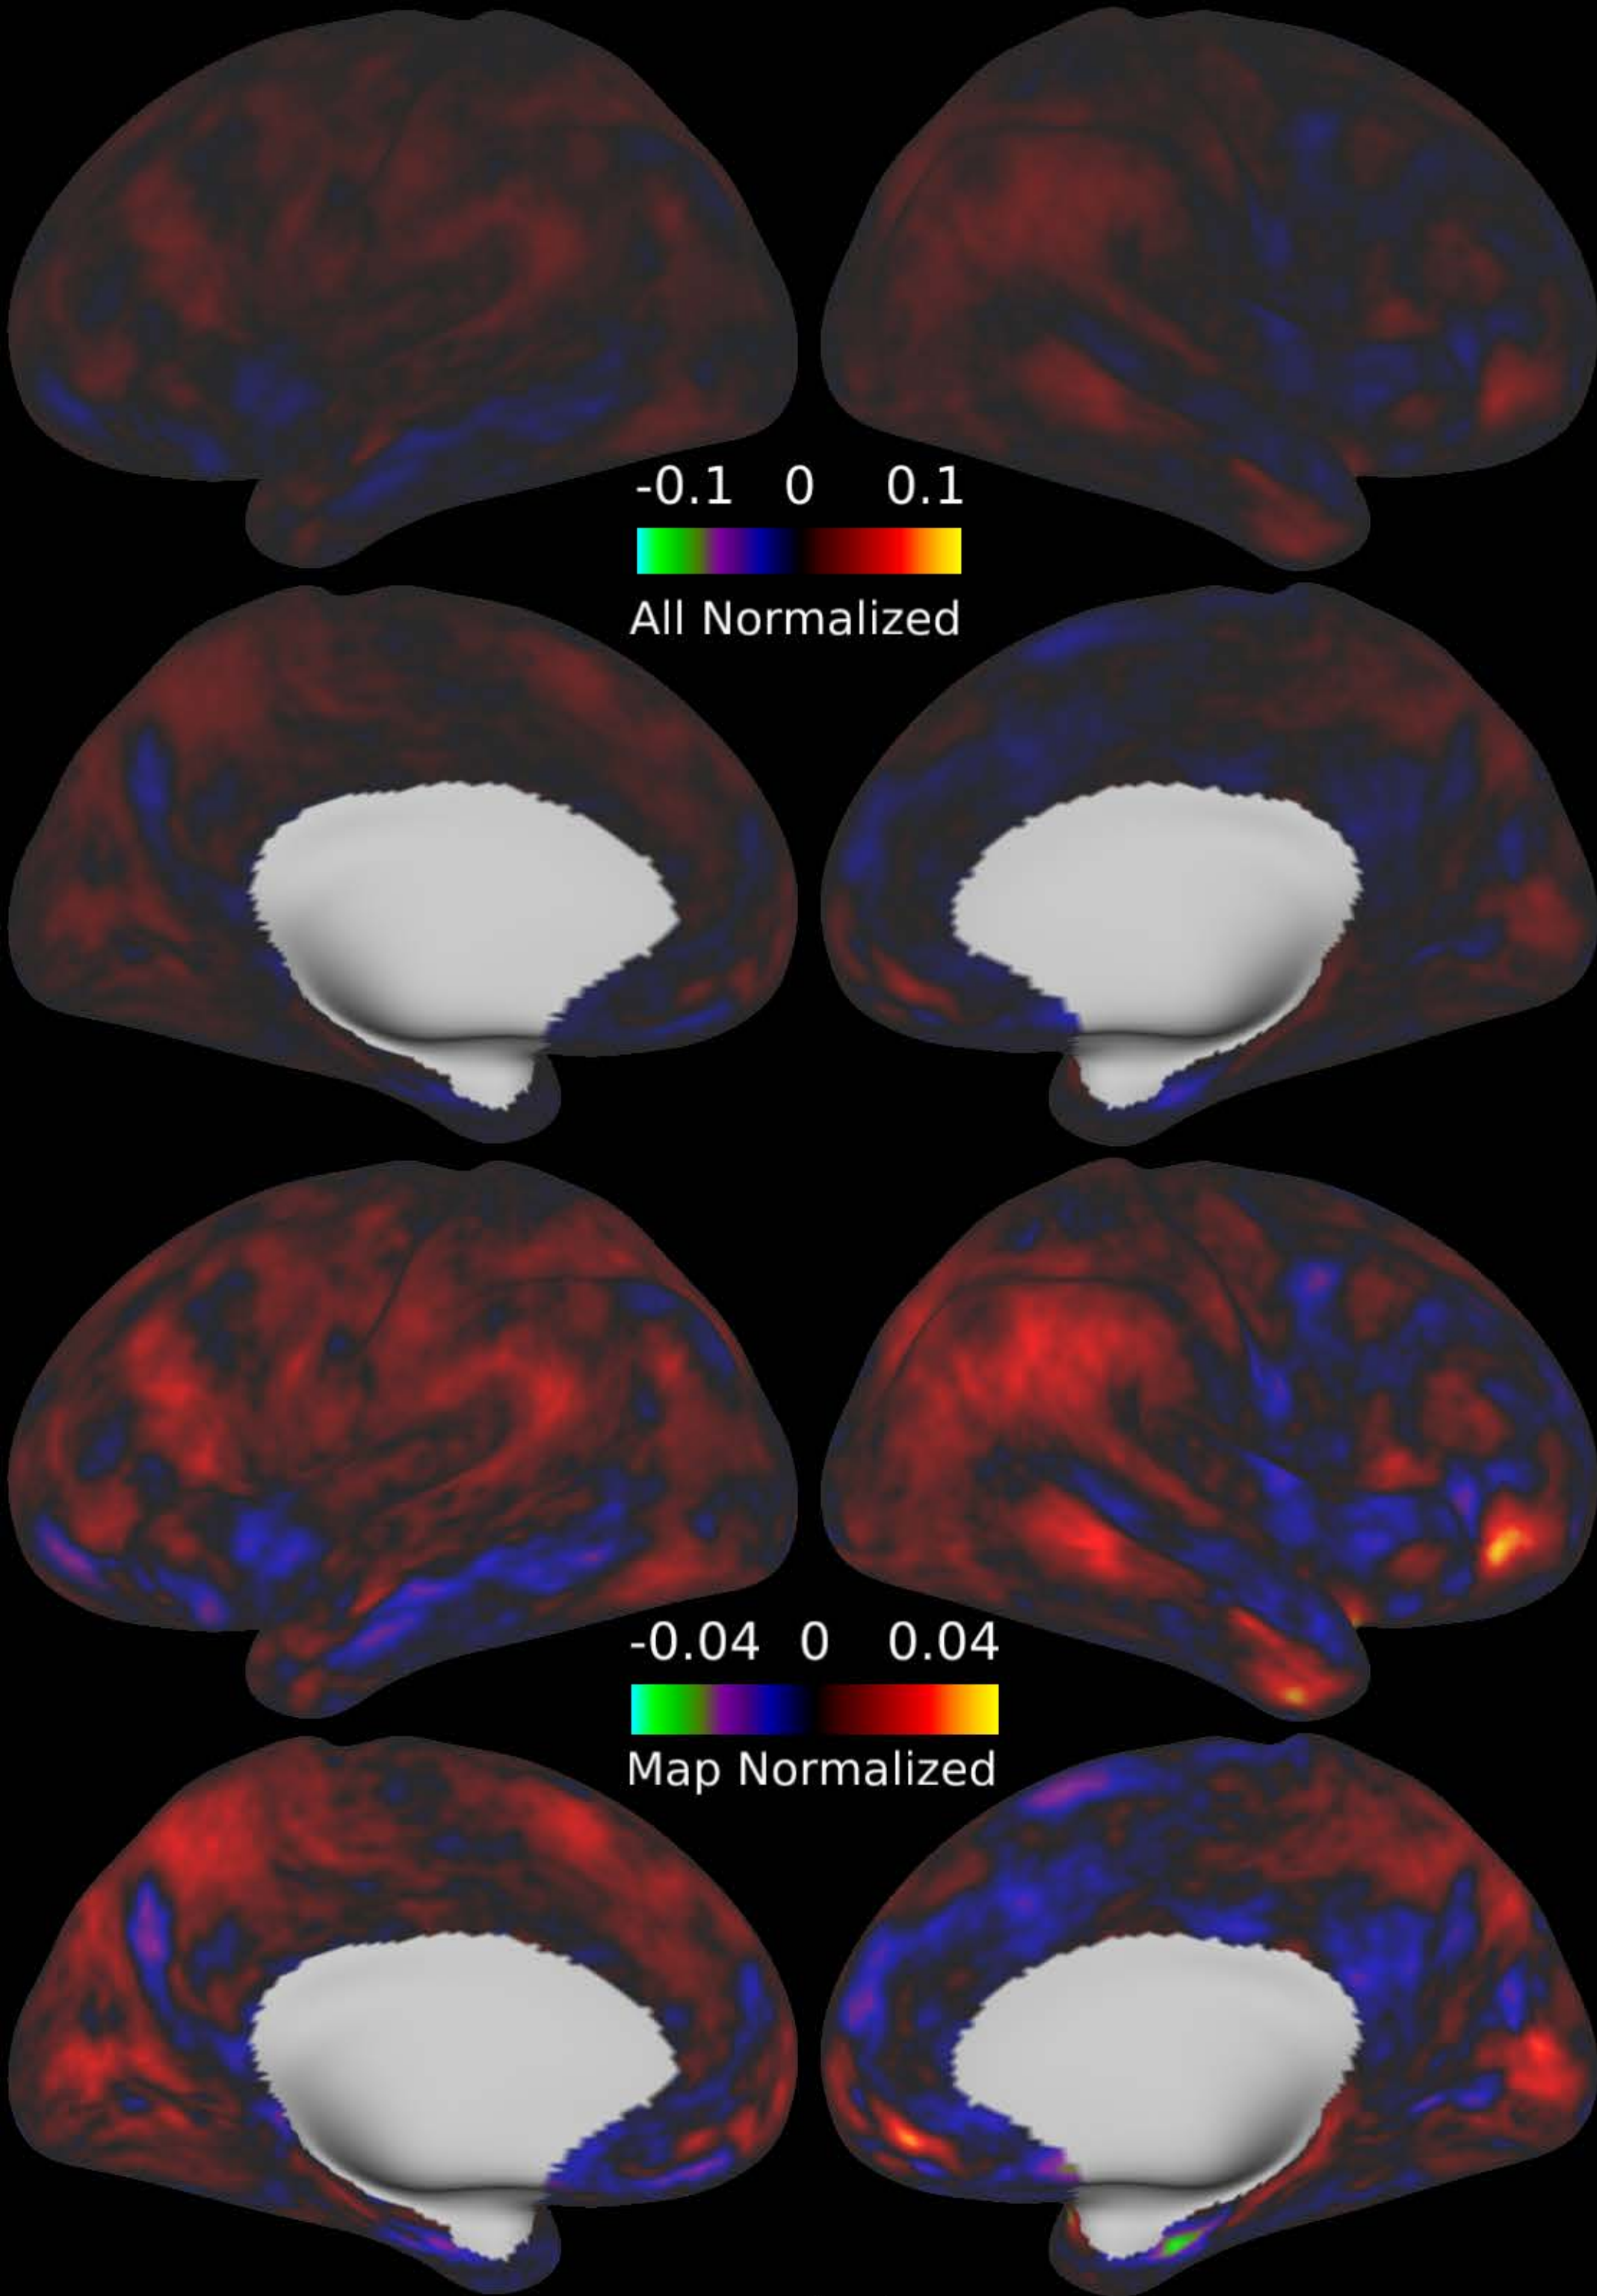

Hertz

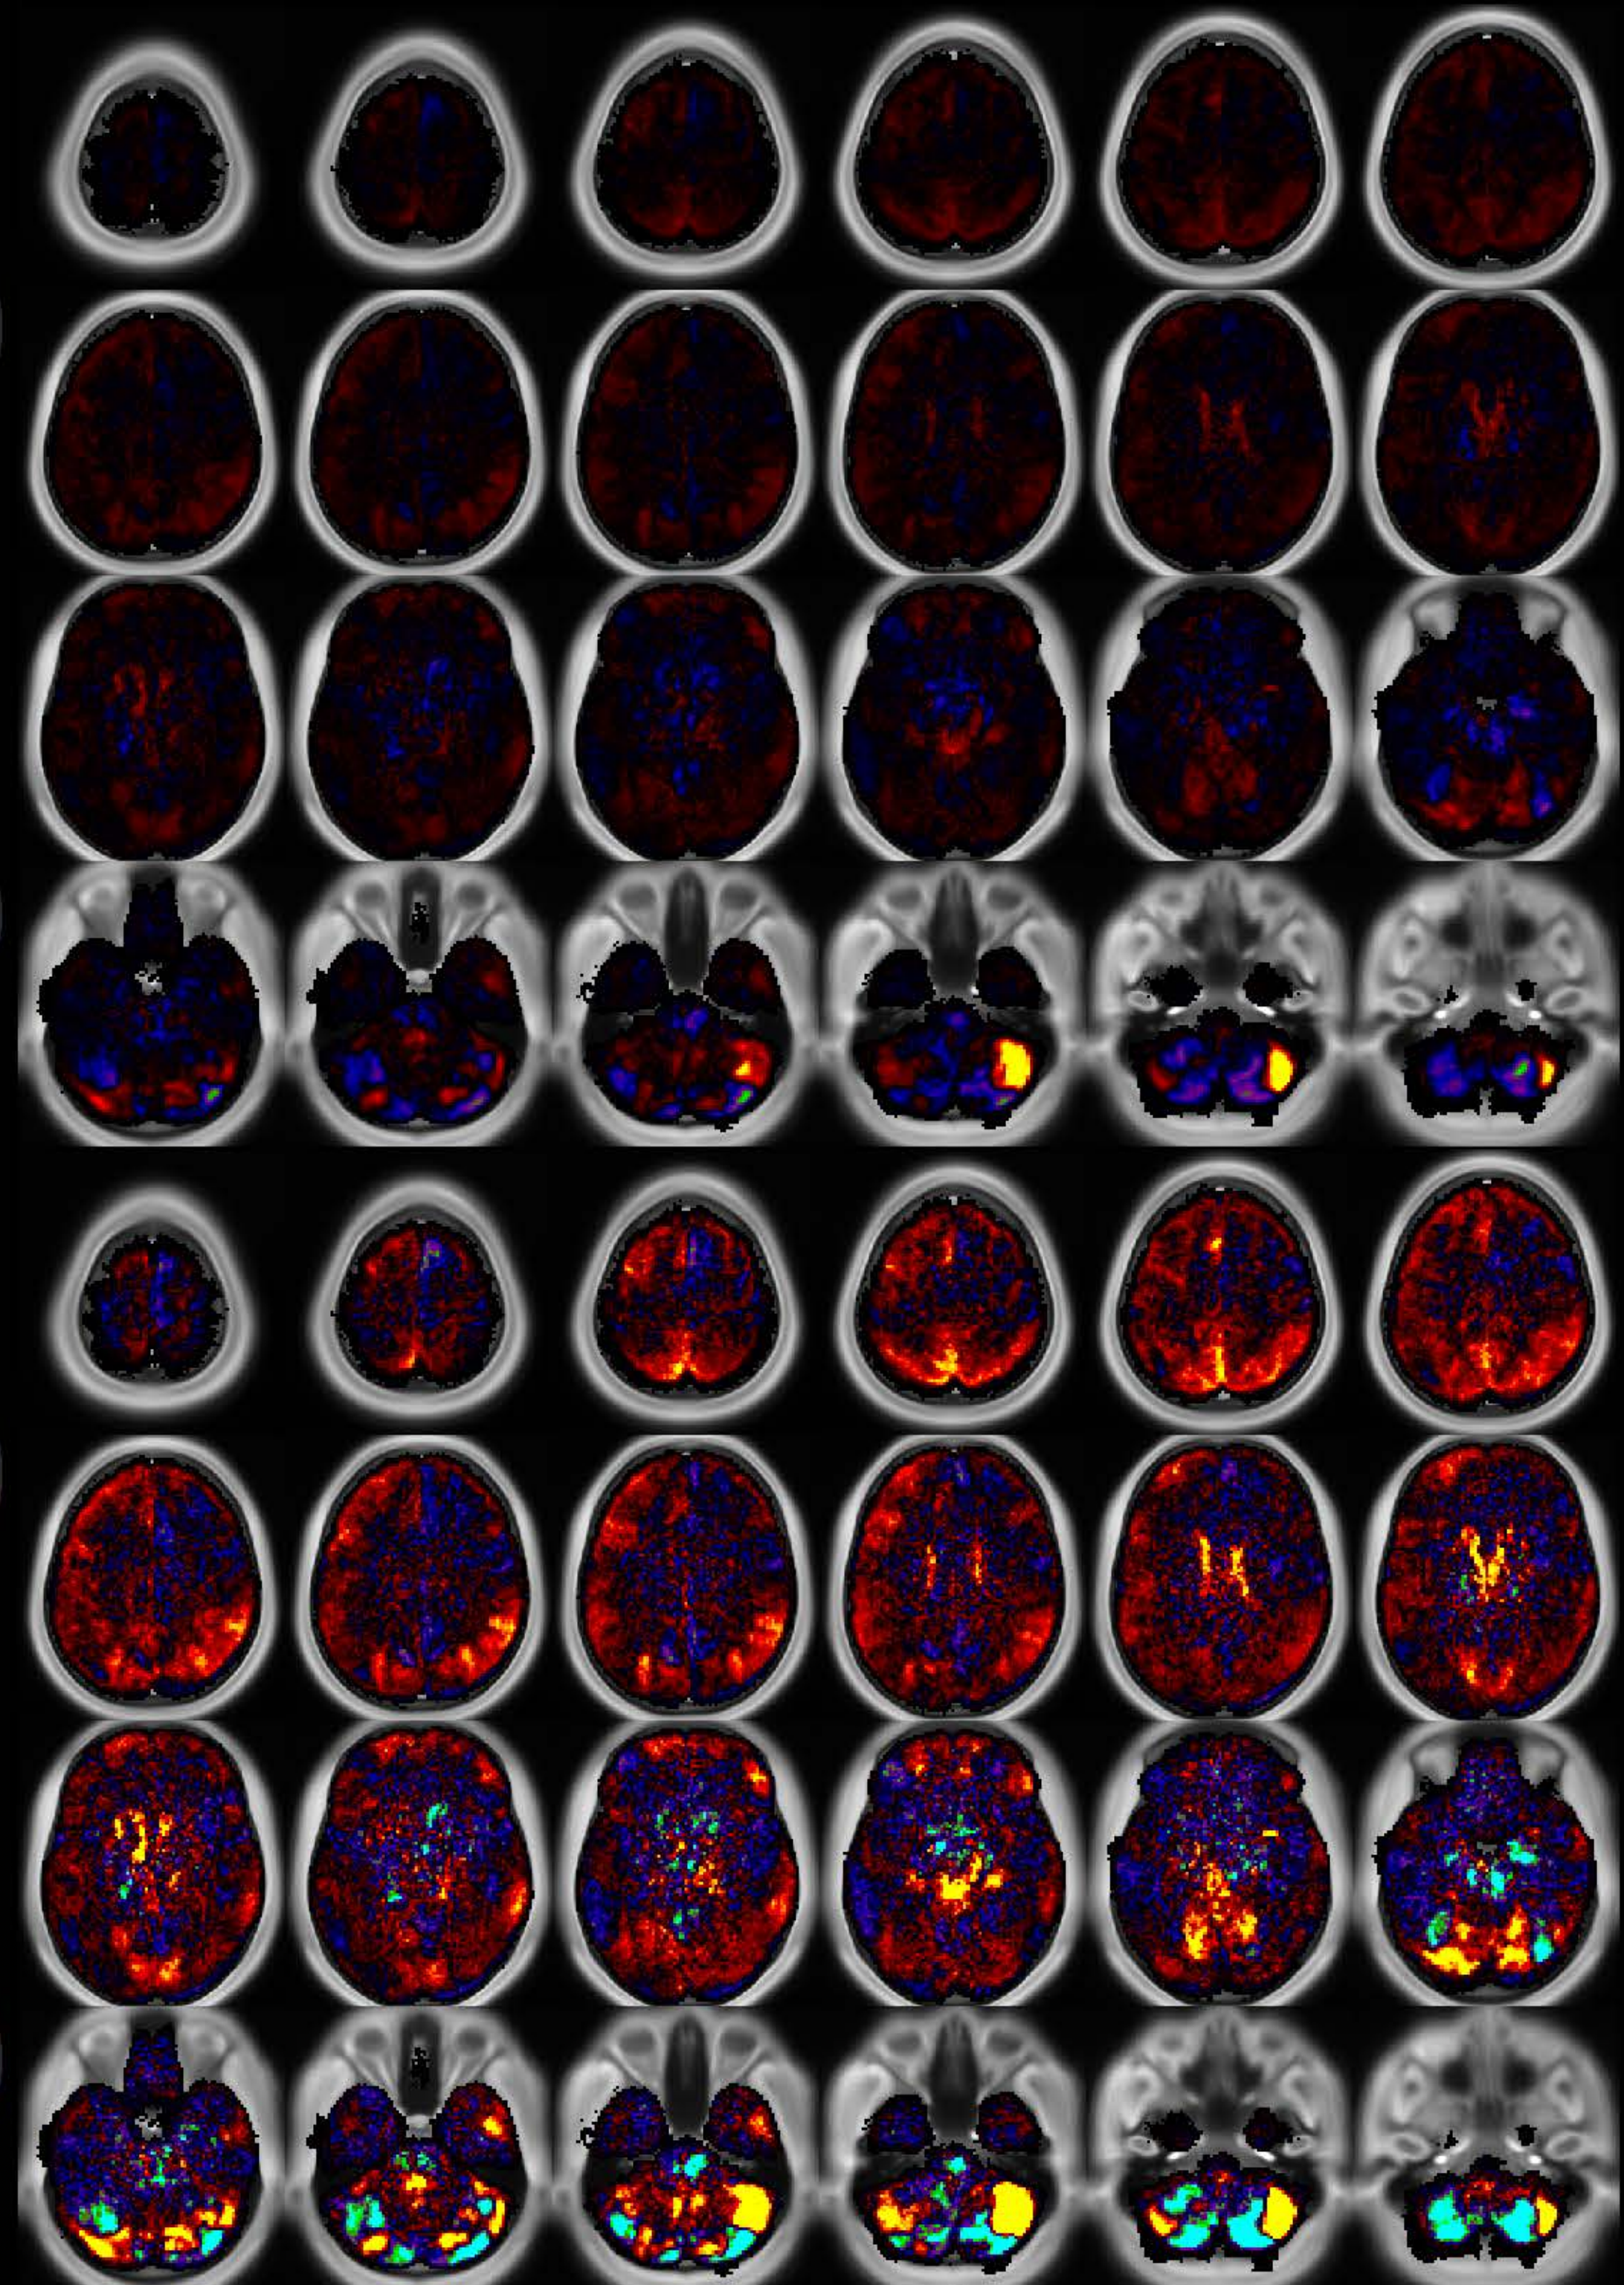

Seconds

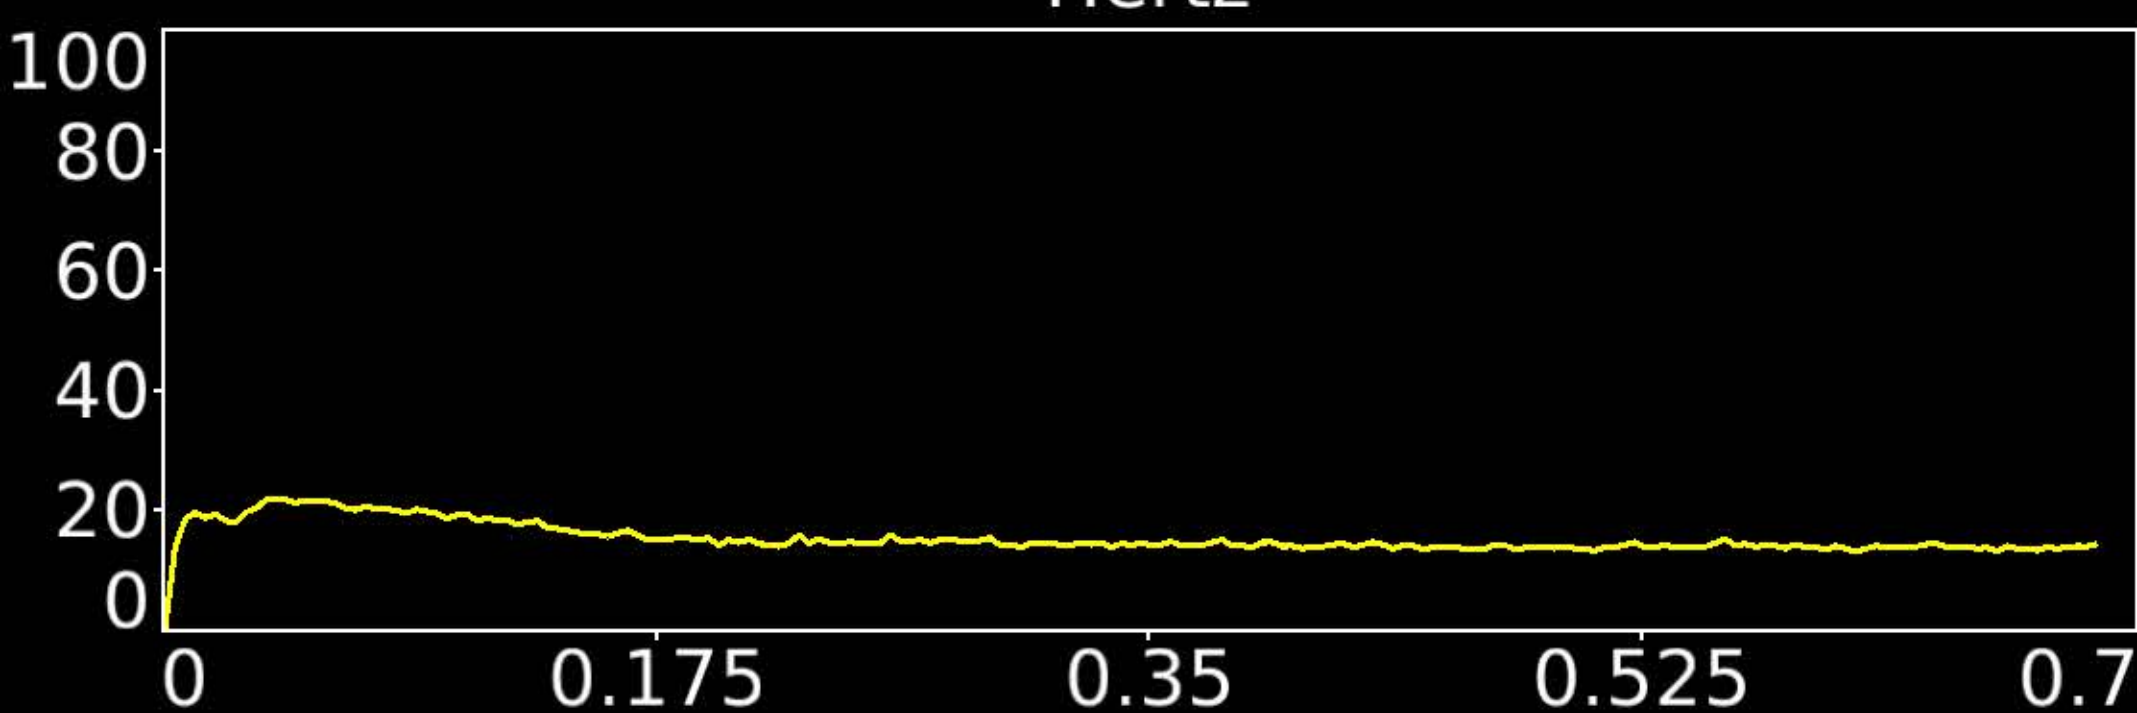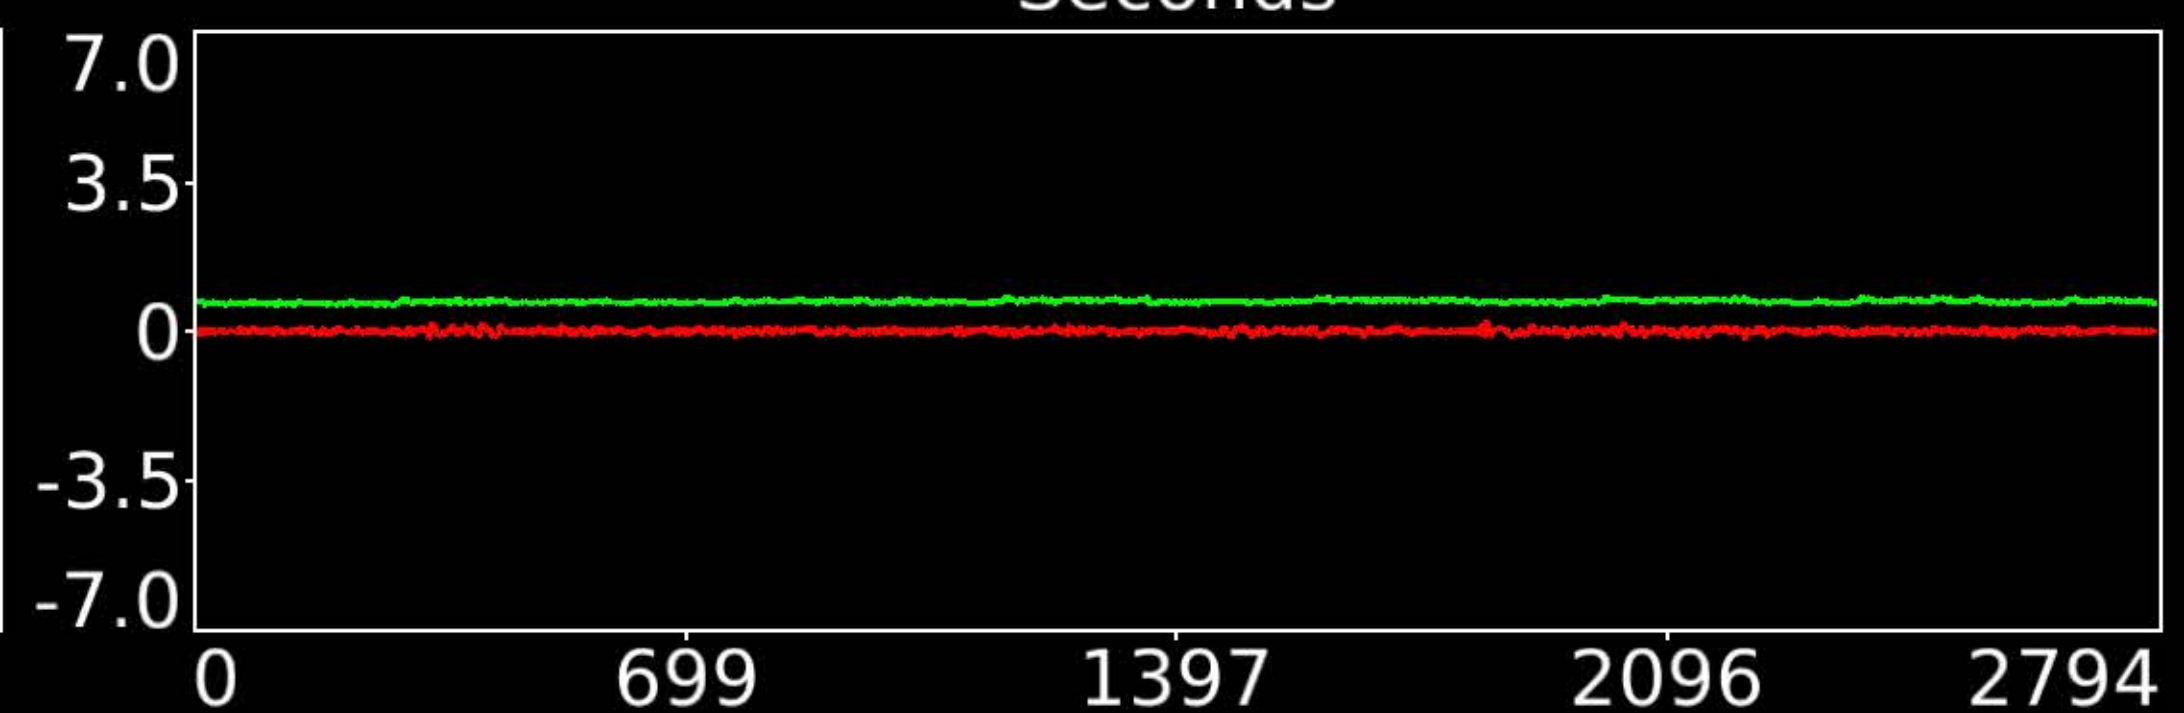

|                                                                                                                         |                            |                                       |  |
|-------------------------------------------------------------------------------------------------------------------------|----------------------------|---------------------------------------|--|
| Number & Class: 52 Noise                                                                                                |                            | Name: R Cerebellum Near Sigmoid Sinus |  |
| RVT Correlated: No                                                                                                      | DVARS Dip Associated: No   | Cross-Subject Variable: No            |  |
| Single Subject: Yes                                                                                                     | % Variance Explained: 0.91 | Globality Index: 0.71                 |  |
| Task Component: 48                                                                                                      | Rest Component: No         | Task Modulated: No                    |  |
| Rationale: Classified same as TC48: single subject component whose spatial map is not reflective of known RSNs or areas |                            |                                       |  |



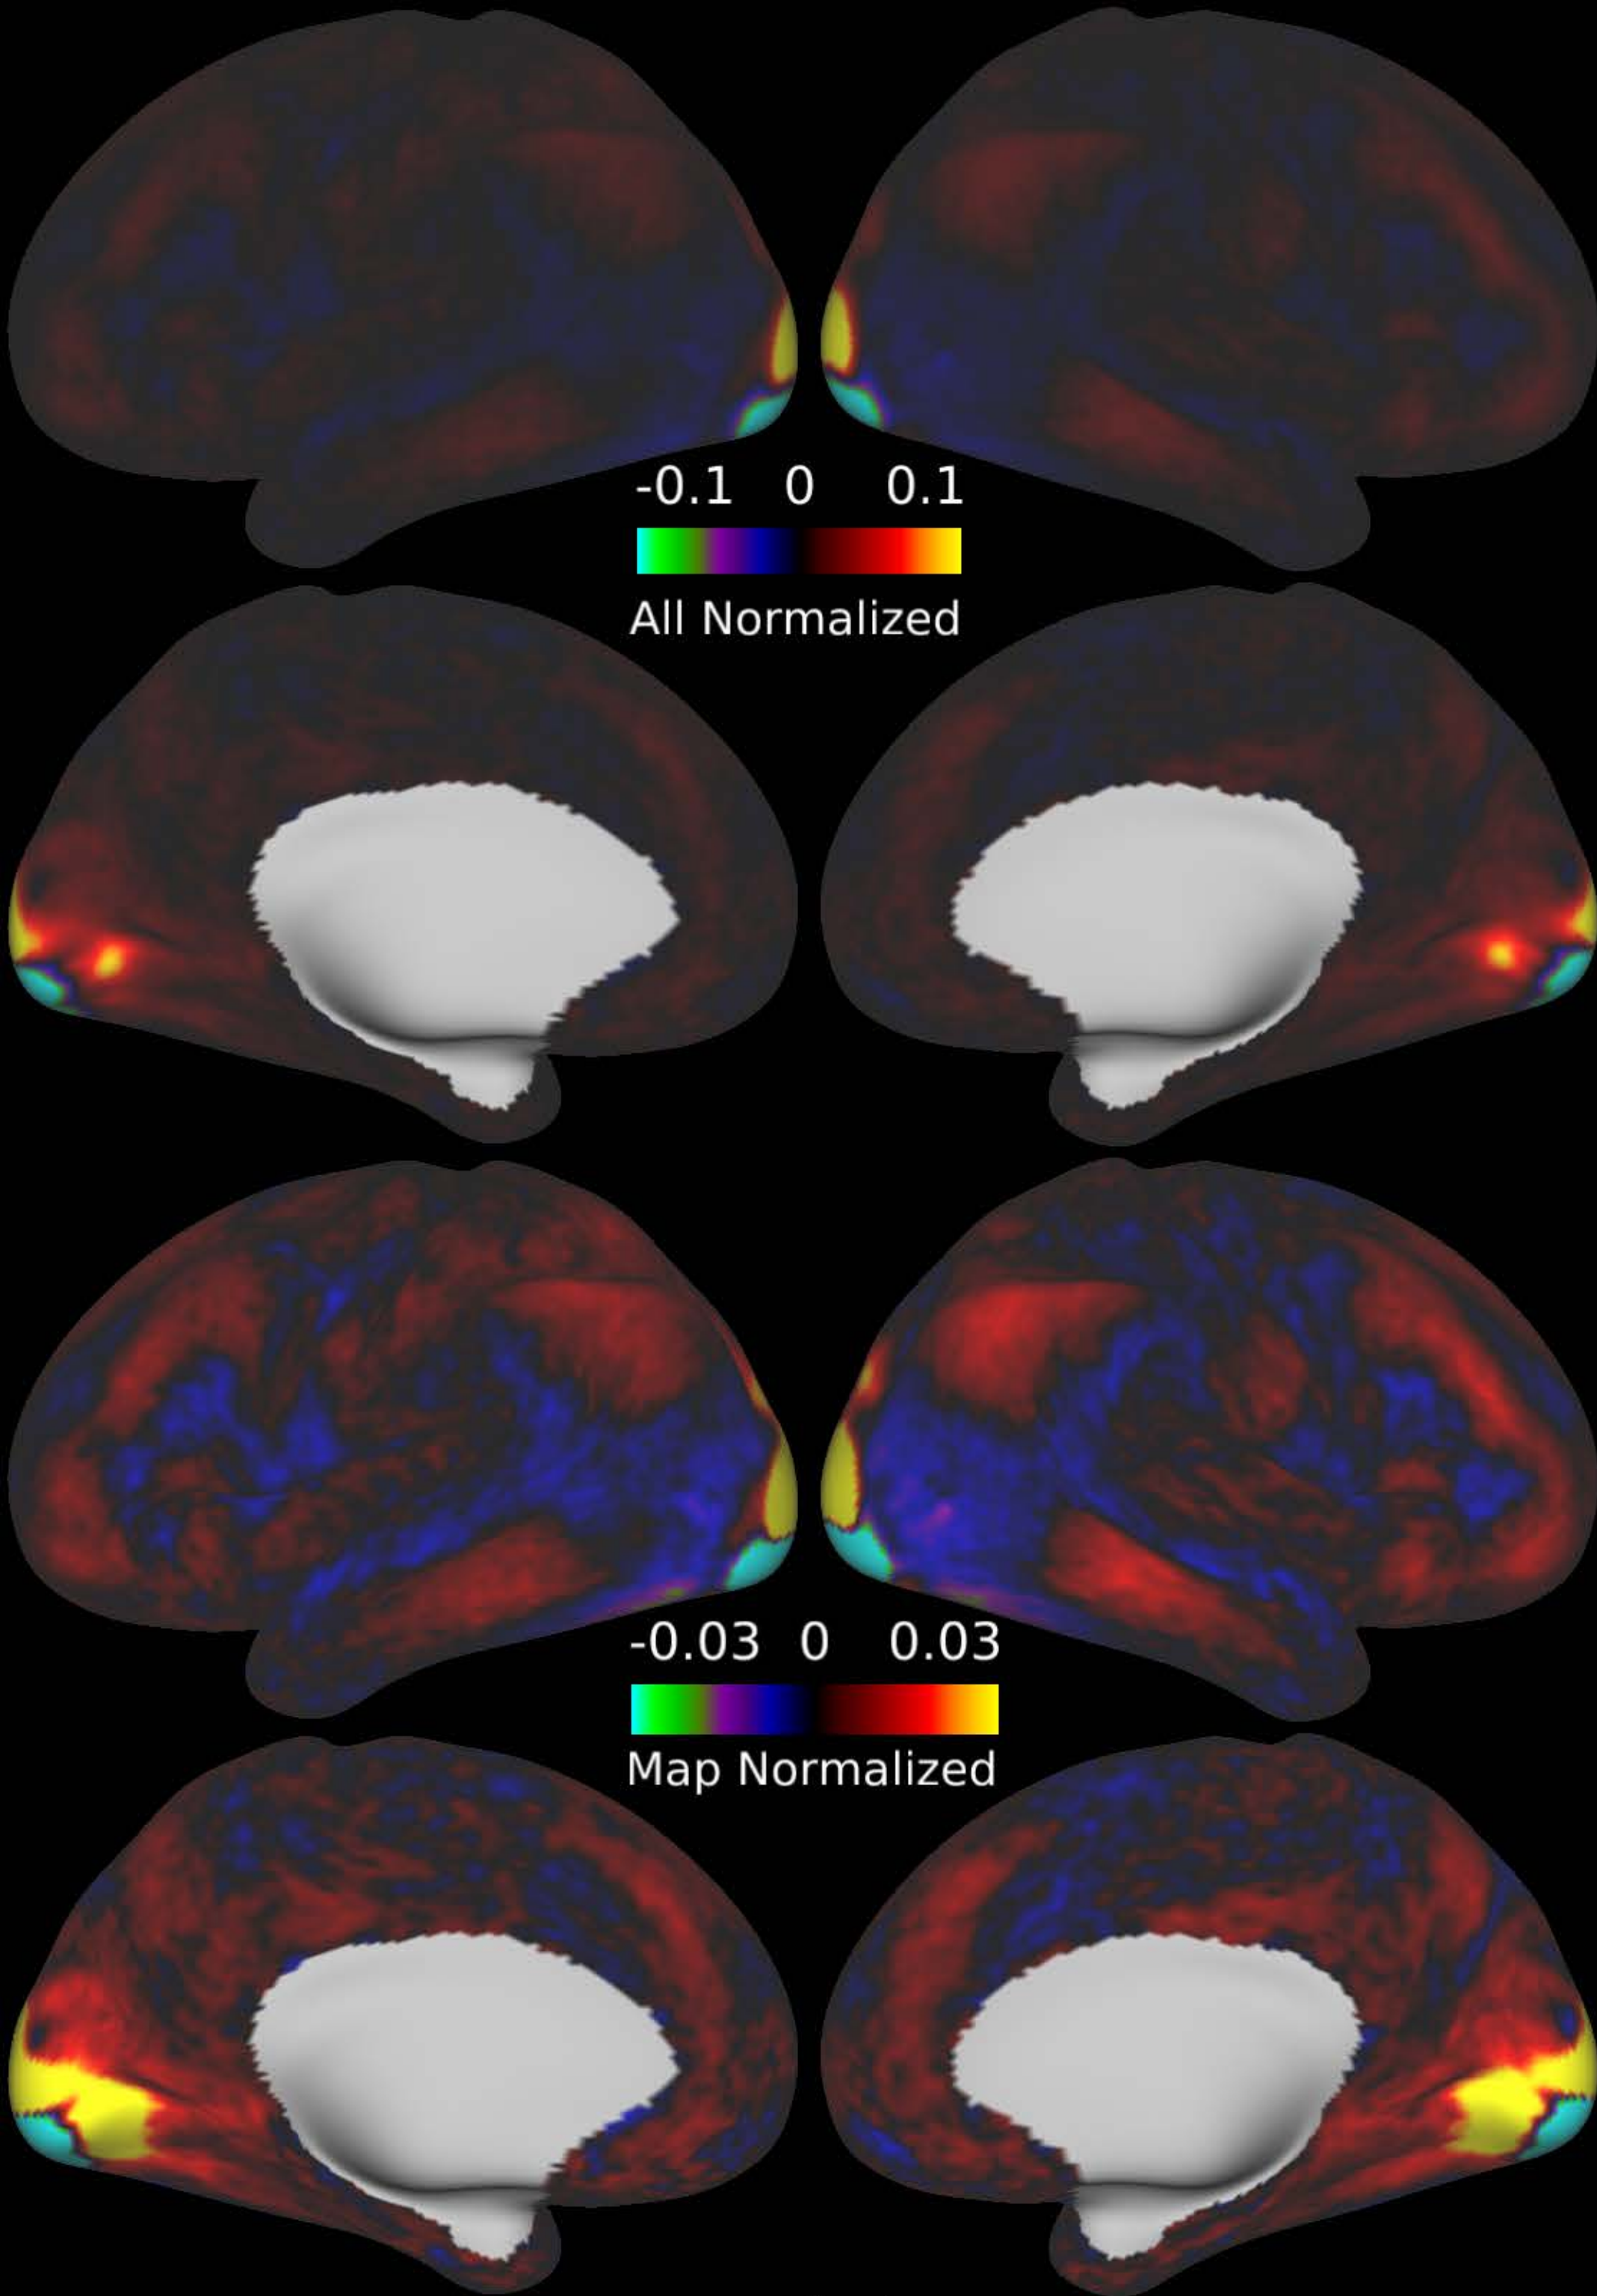

Hertz

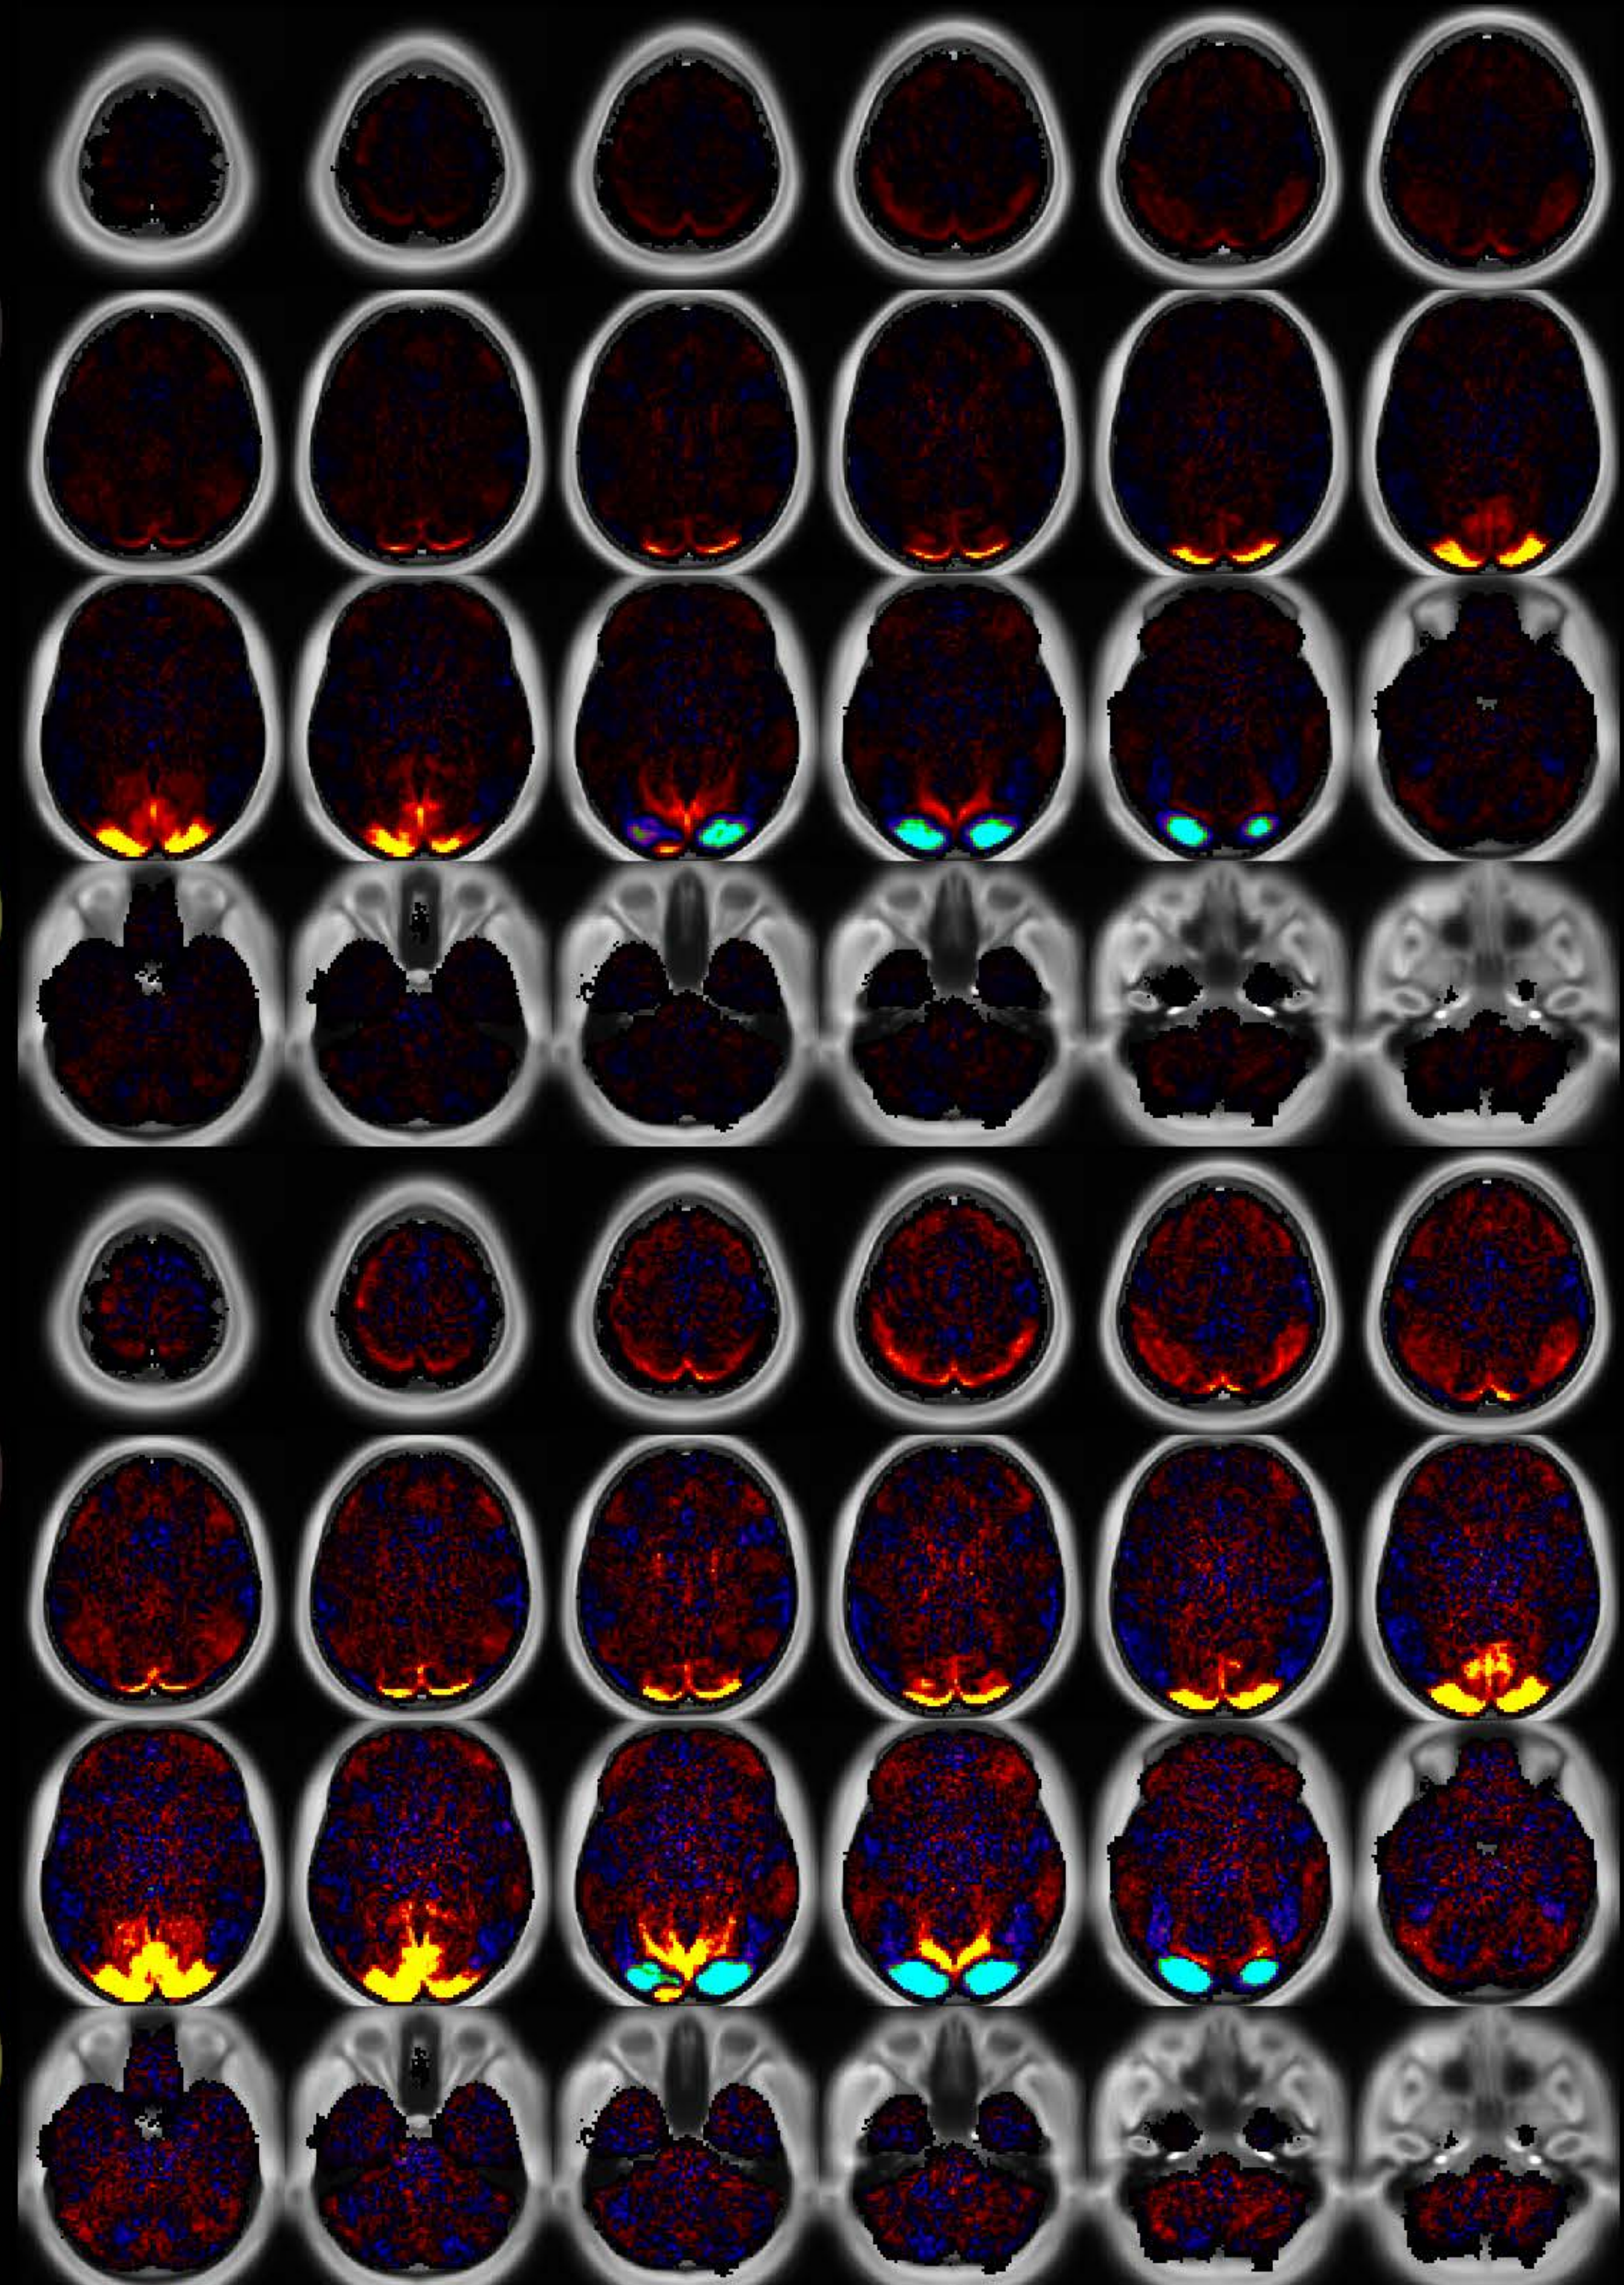

Seconds

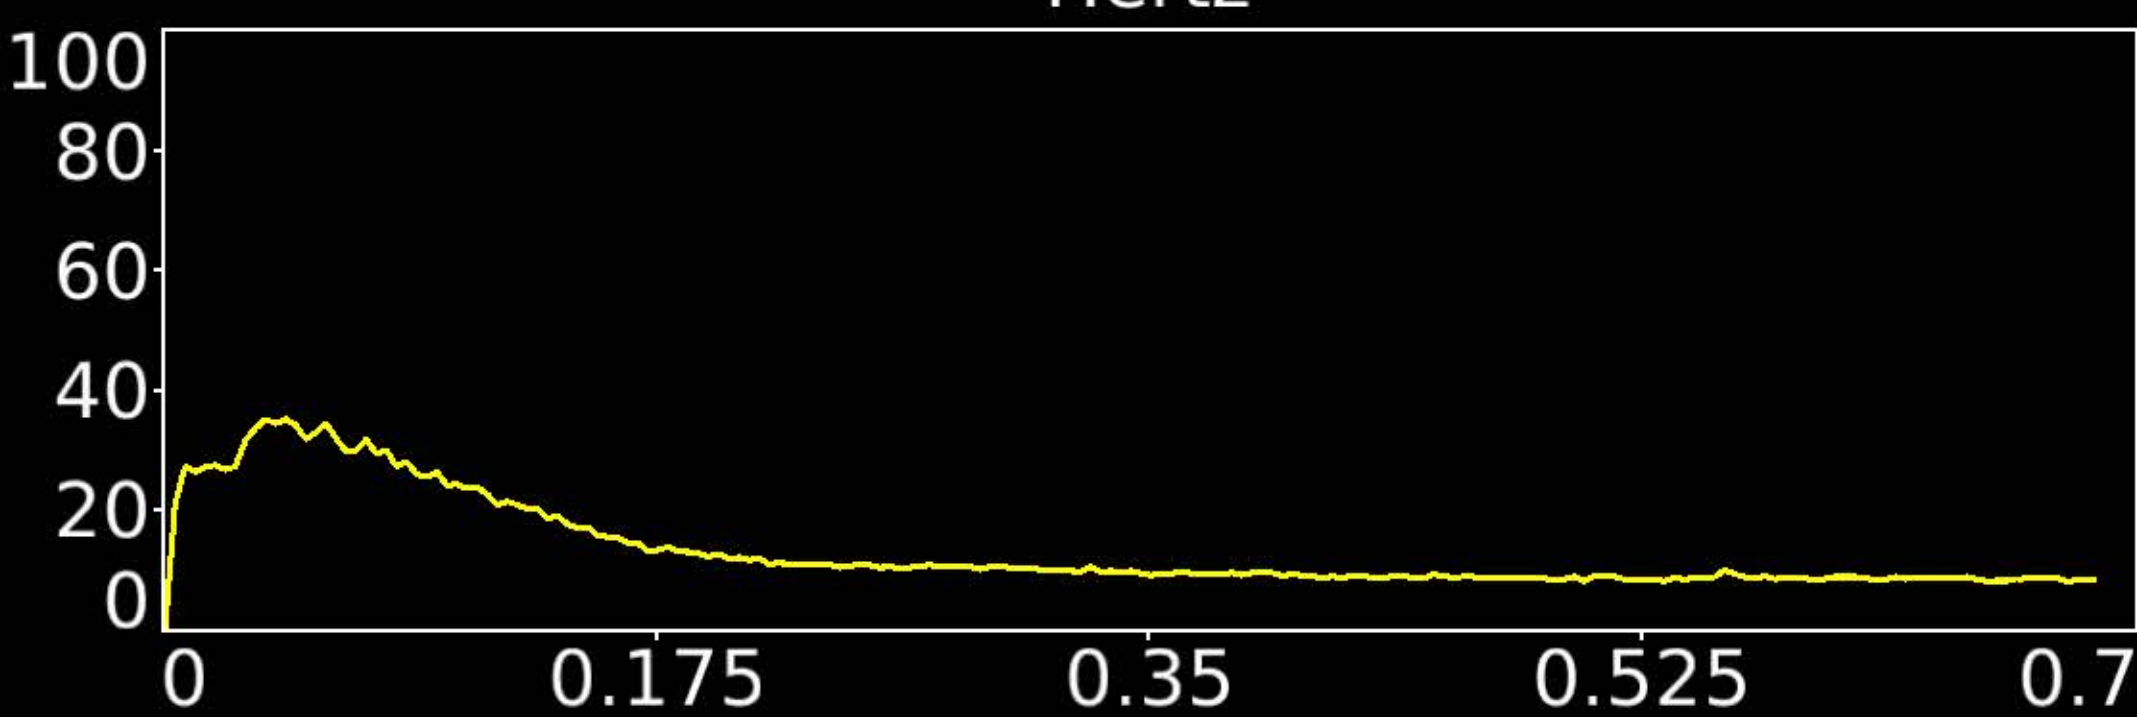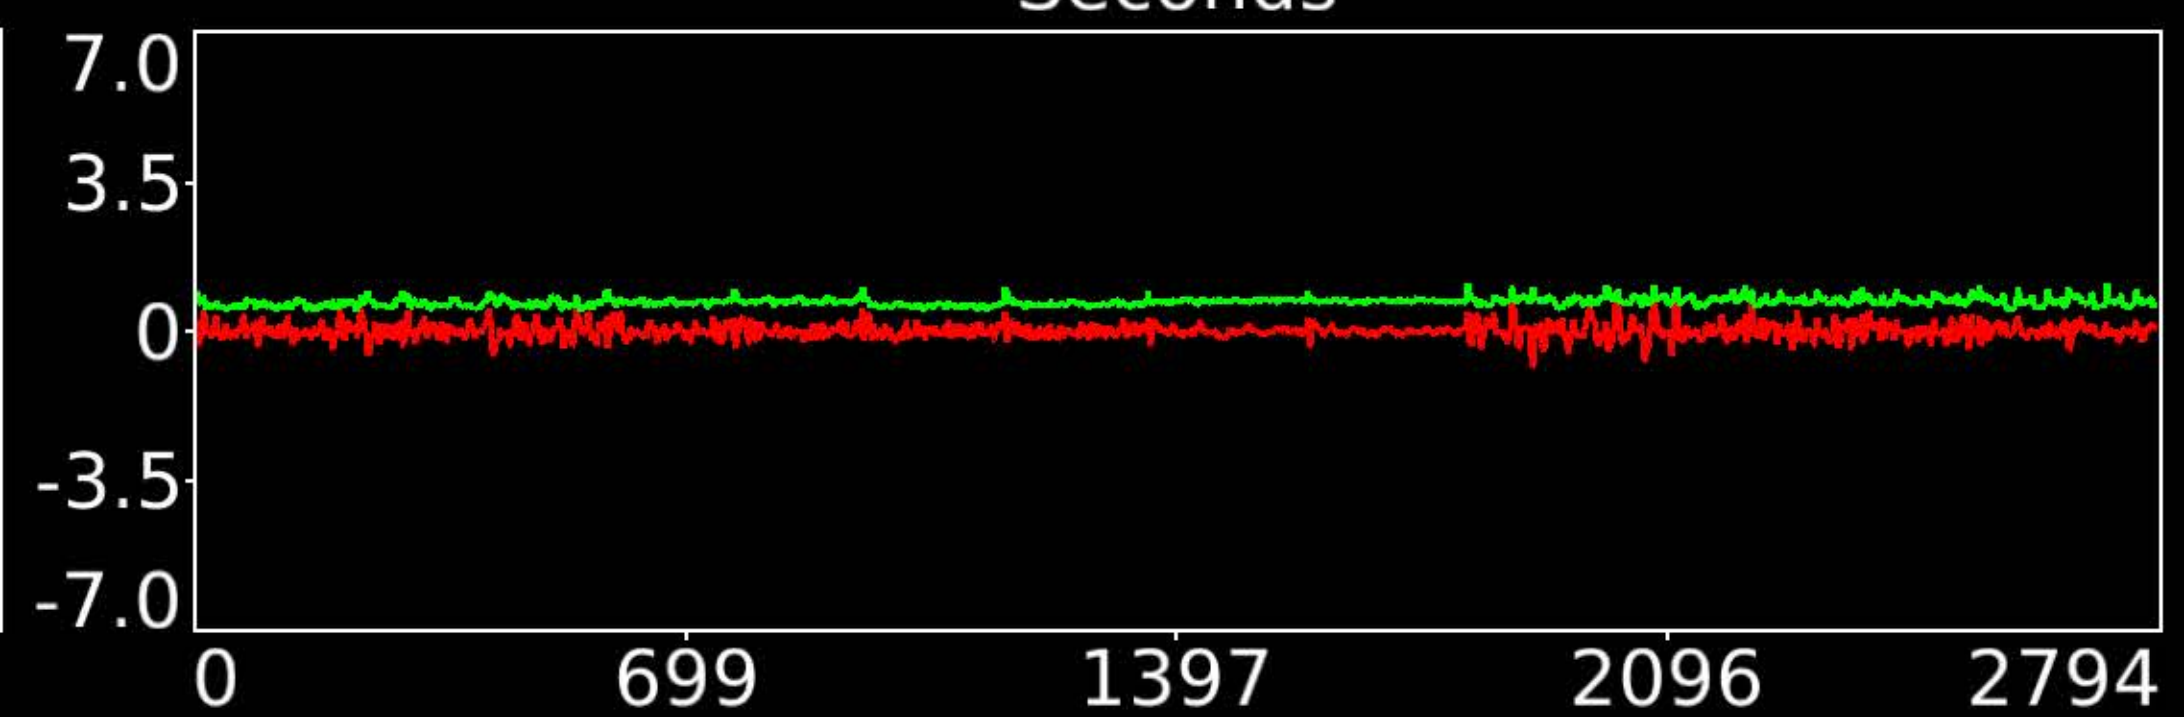

|                           |                            |                                           |  |
|---------------------------|----------------------------|-------------------------------------------|--|
| Number & Class: 53 Signal |                            | Name: Visuotopic: Foveal Dorsal > Ventral |  |
| RVT Correlated: No        | DVARS Dip Associated: No   | Cross-Subject Variable: No                |  |
| Single Subject: No        | % Variance Explained: 0.91 | Globality Index: 0.81                     |  |
| Task Component: 65        | Rest Component: 76         | Task Modulated: No                        |  |

Rationale: Spatial map includes positive and negative patches that respect known retinotopic visual organization (Foveal and Lower vs Upper)



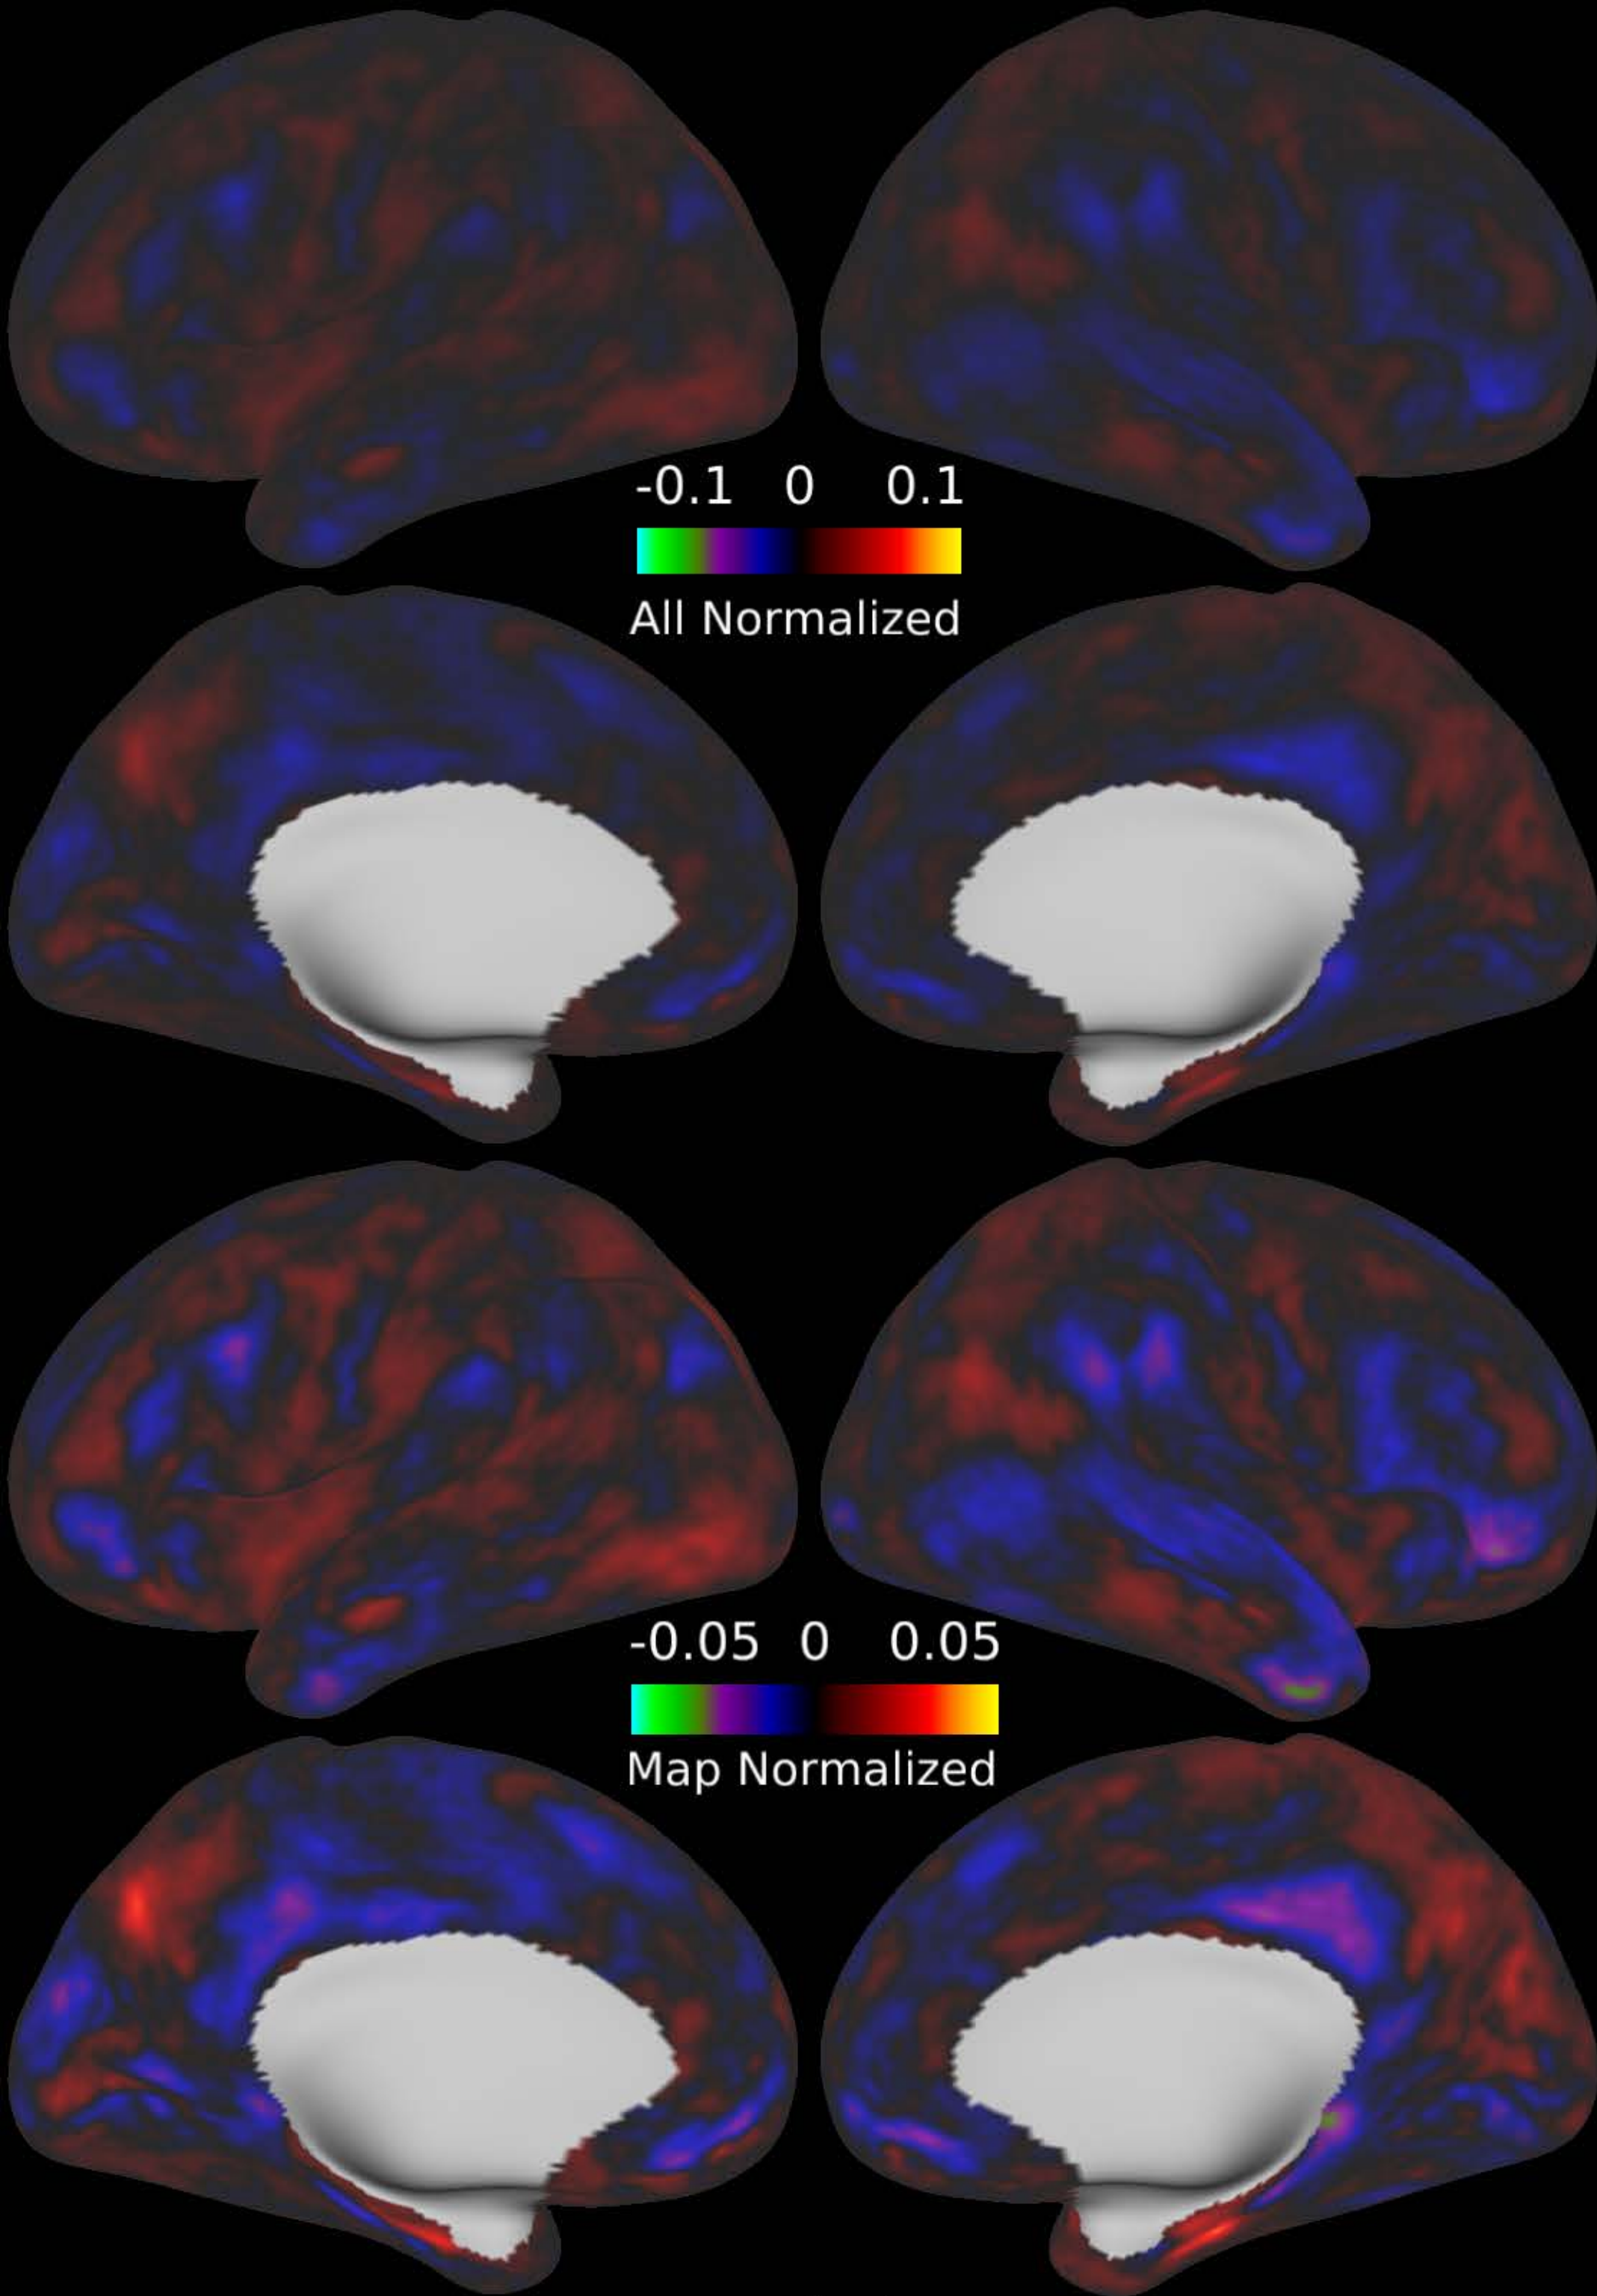

Hertz

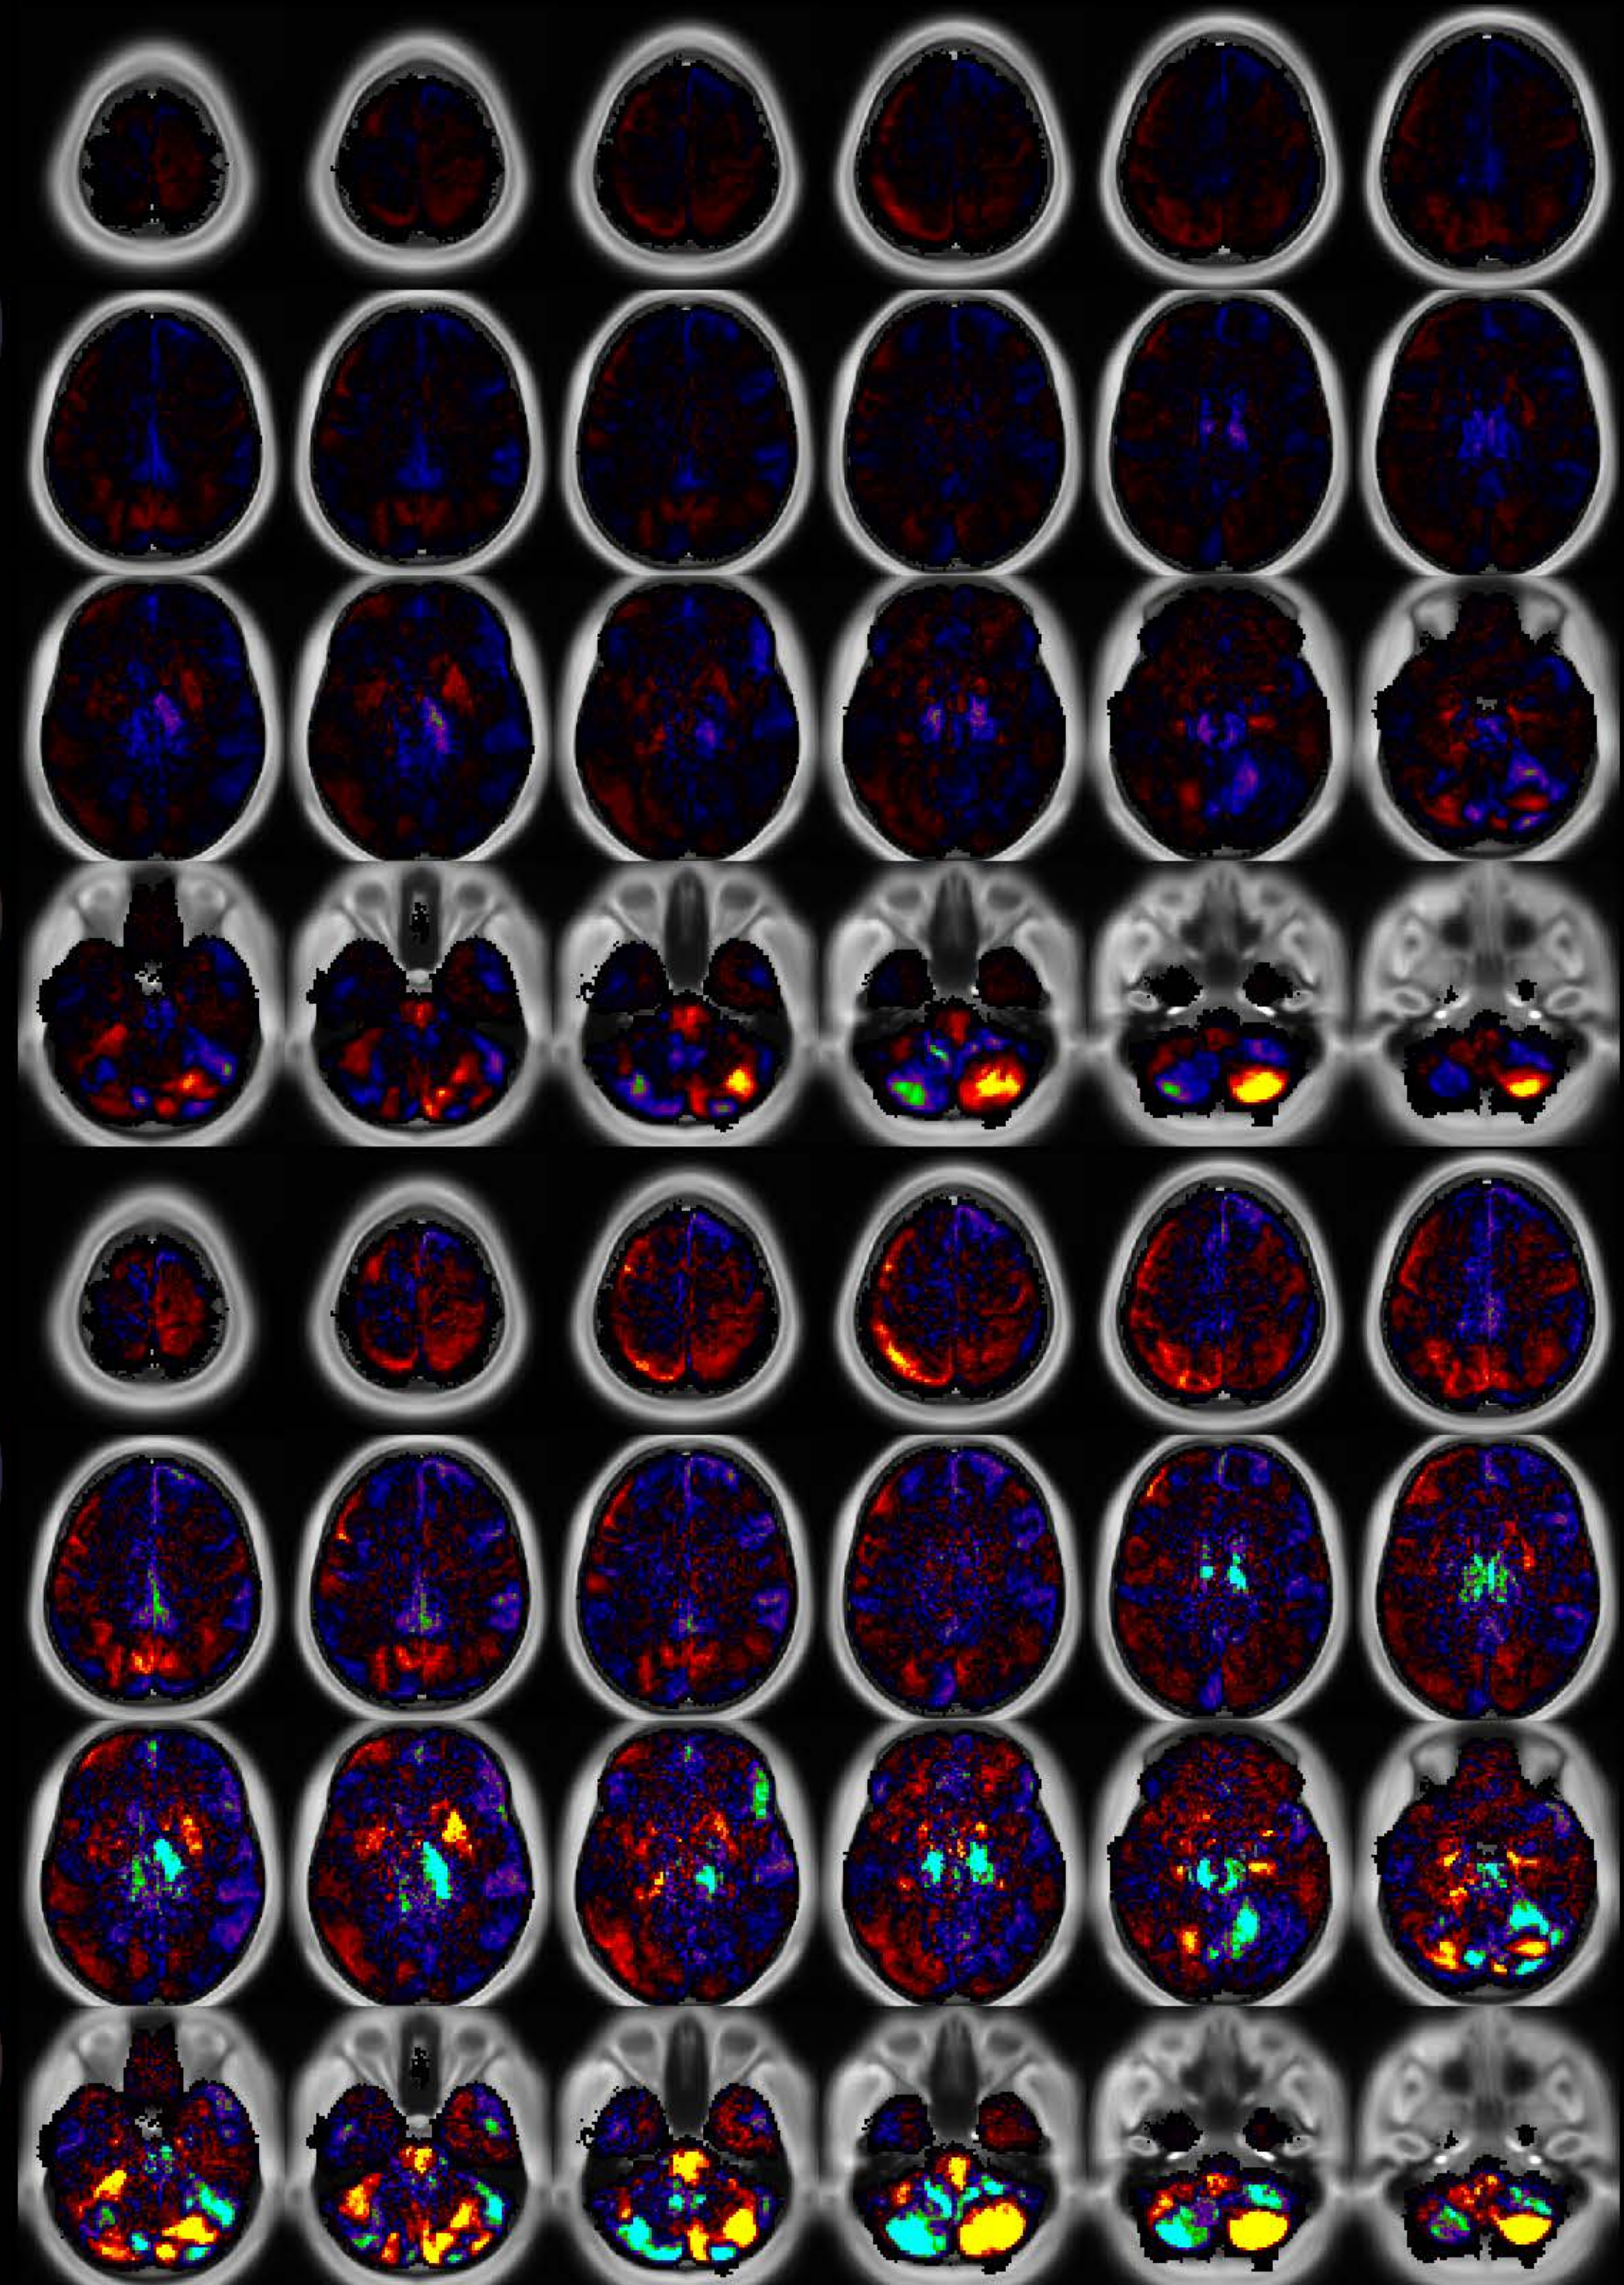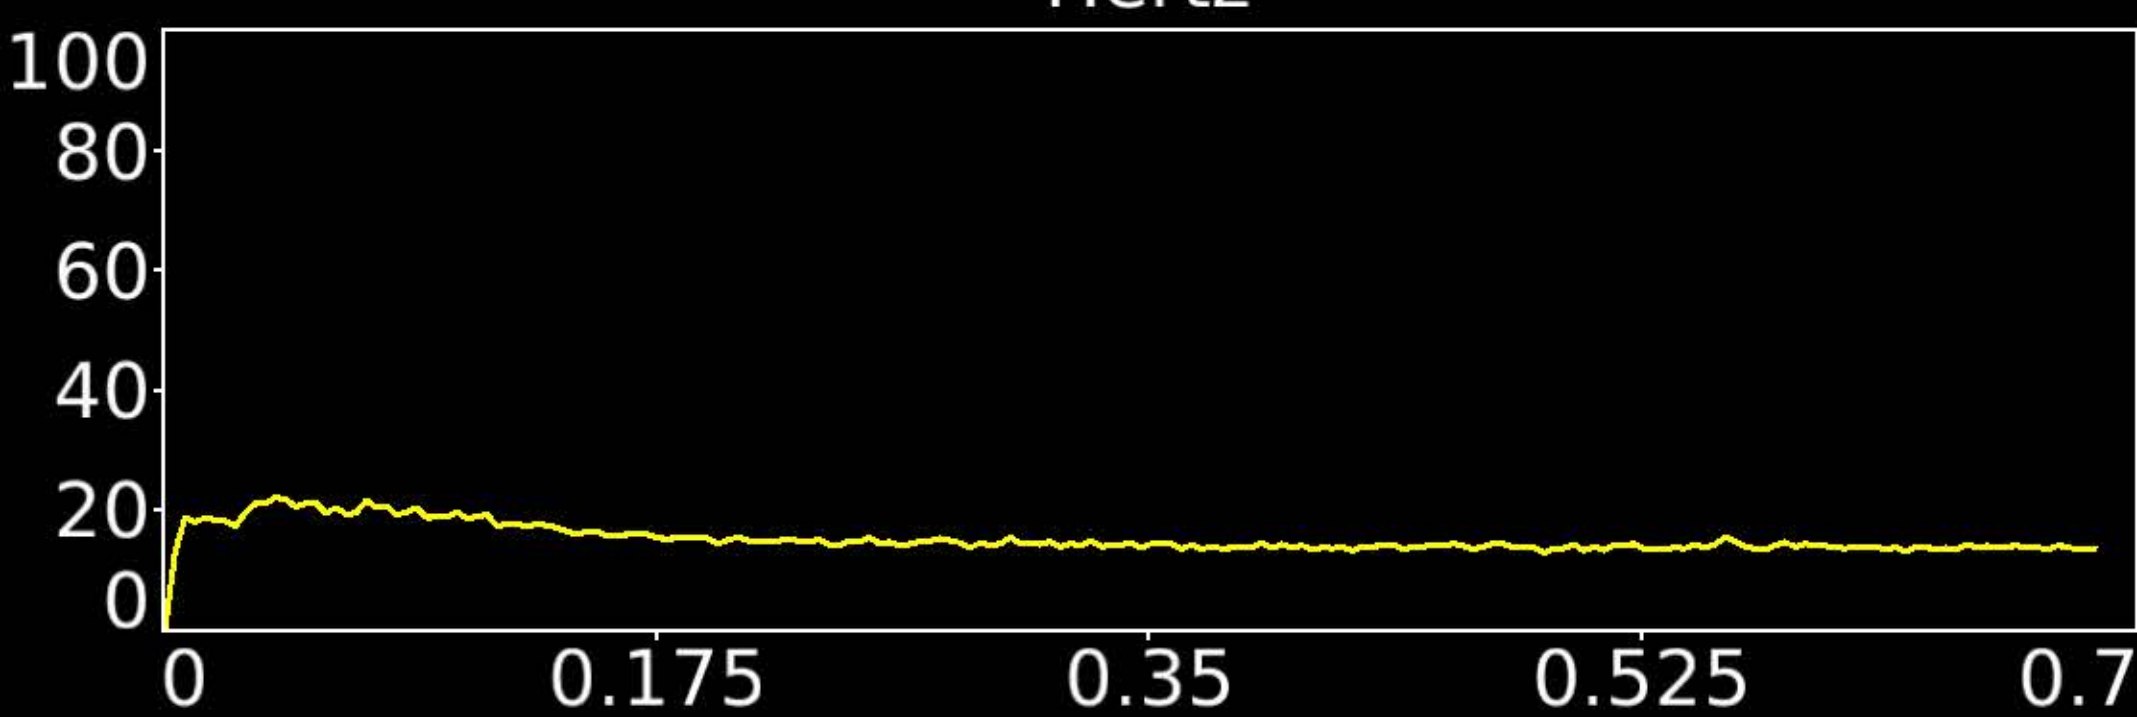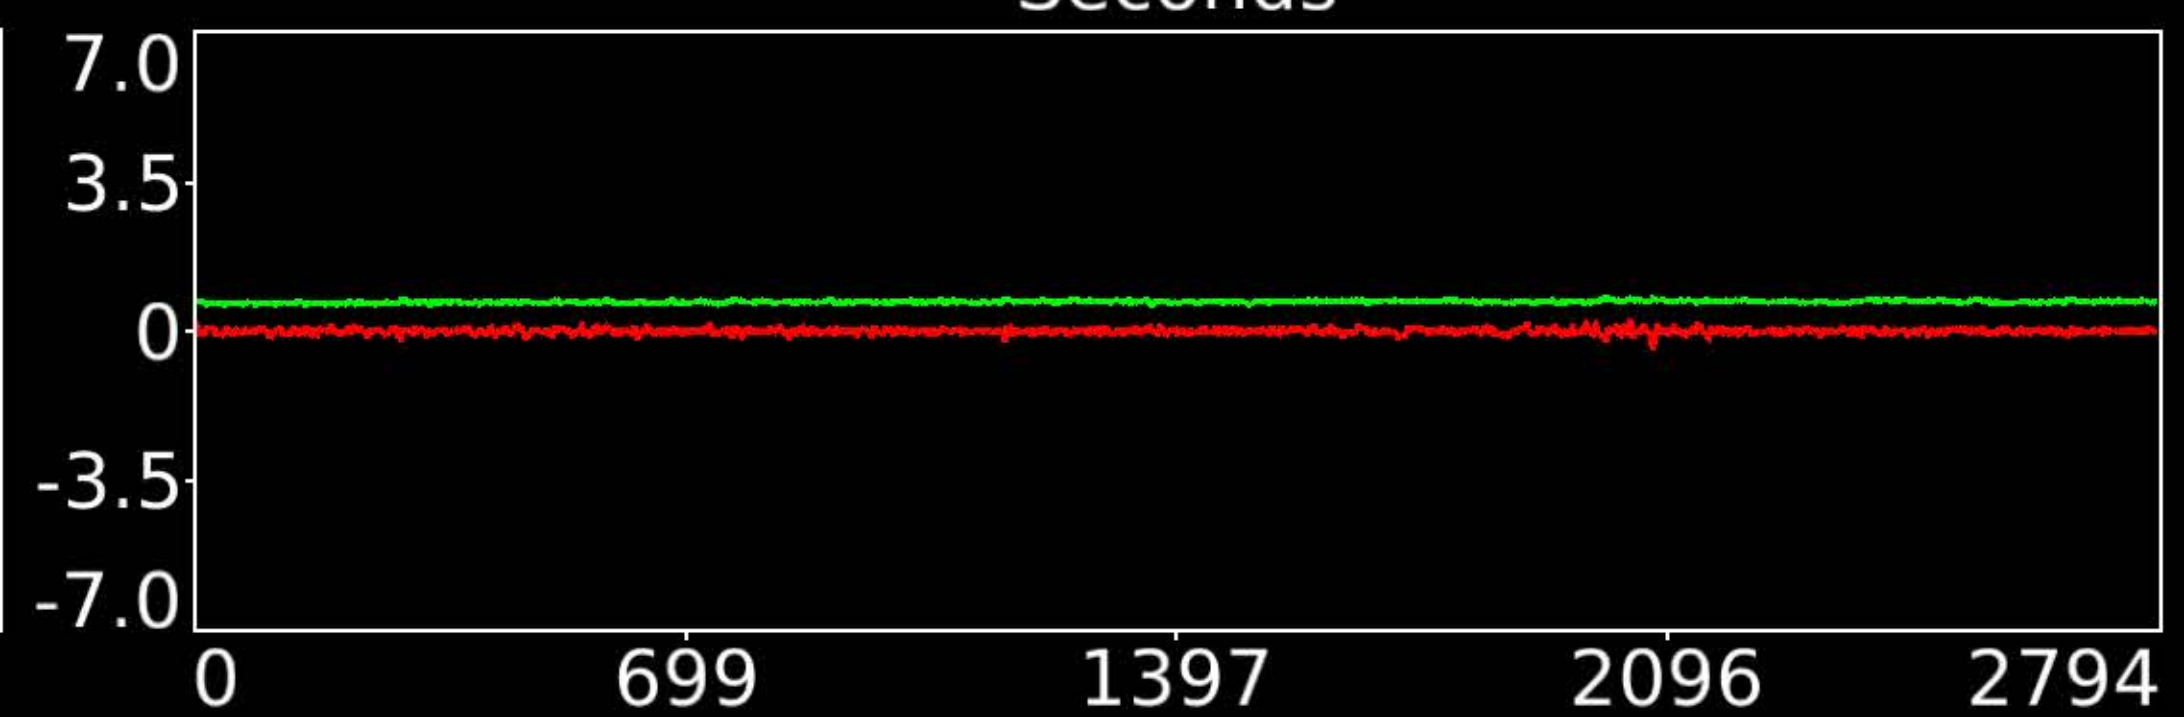

|                                                                           |                           |                                                     |  |
|---------------------------------------------------------------------------|---------------------------|-----------------------------------------------------|--|
| Number & Class: 54 Noise                                                  |                           | Name: R Inferior Cerebellum > L Inferior Cerebellum |  |
| RVT Correlated: No                                                        | DVARS Dip Associated: No  | Cross-Subject Variable: No                          |  |
| Single Subject: Yes                                                       | % Variance Explained: 0.9 | Globality Index: 0.13                               |  |
| Task Component: 55                                                        | Rest Component: No        | Task Modulated: No                                  |  |
| Rationale: Single subject component not reflective of known areas or RSNs |                           |                                                     |  |



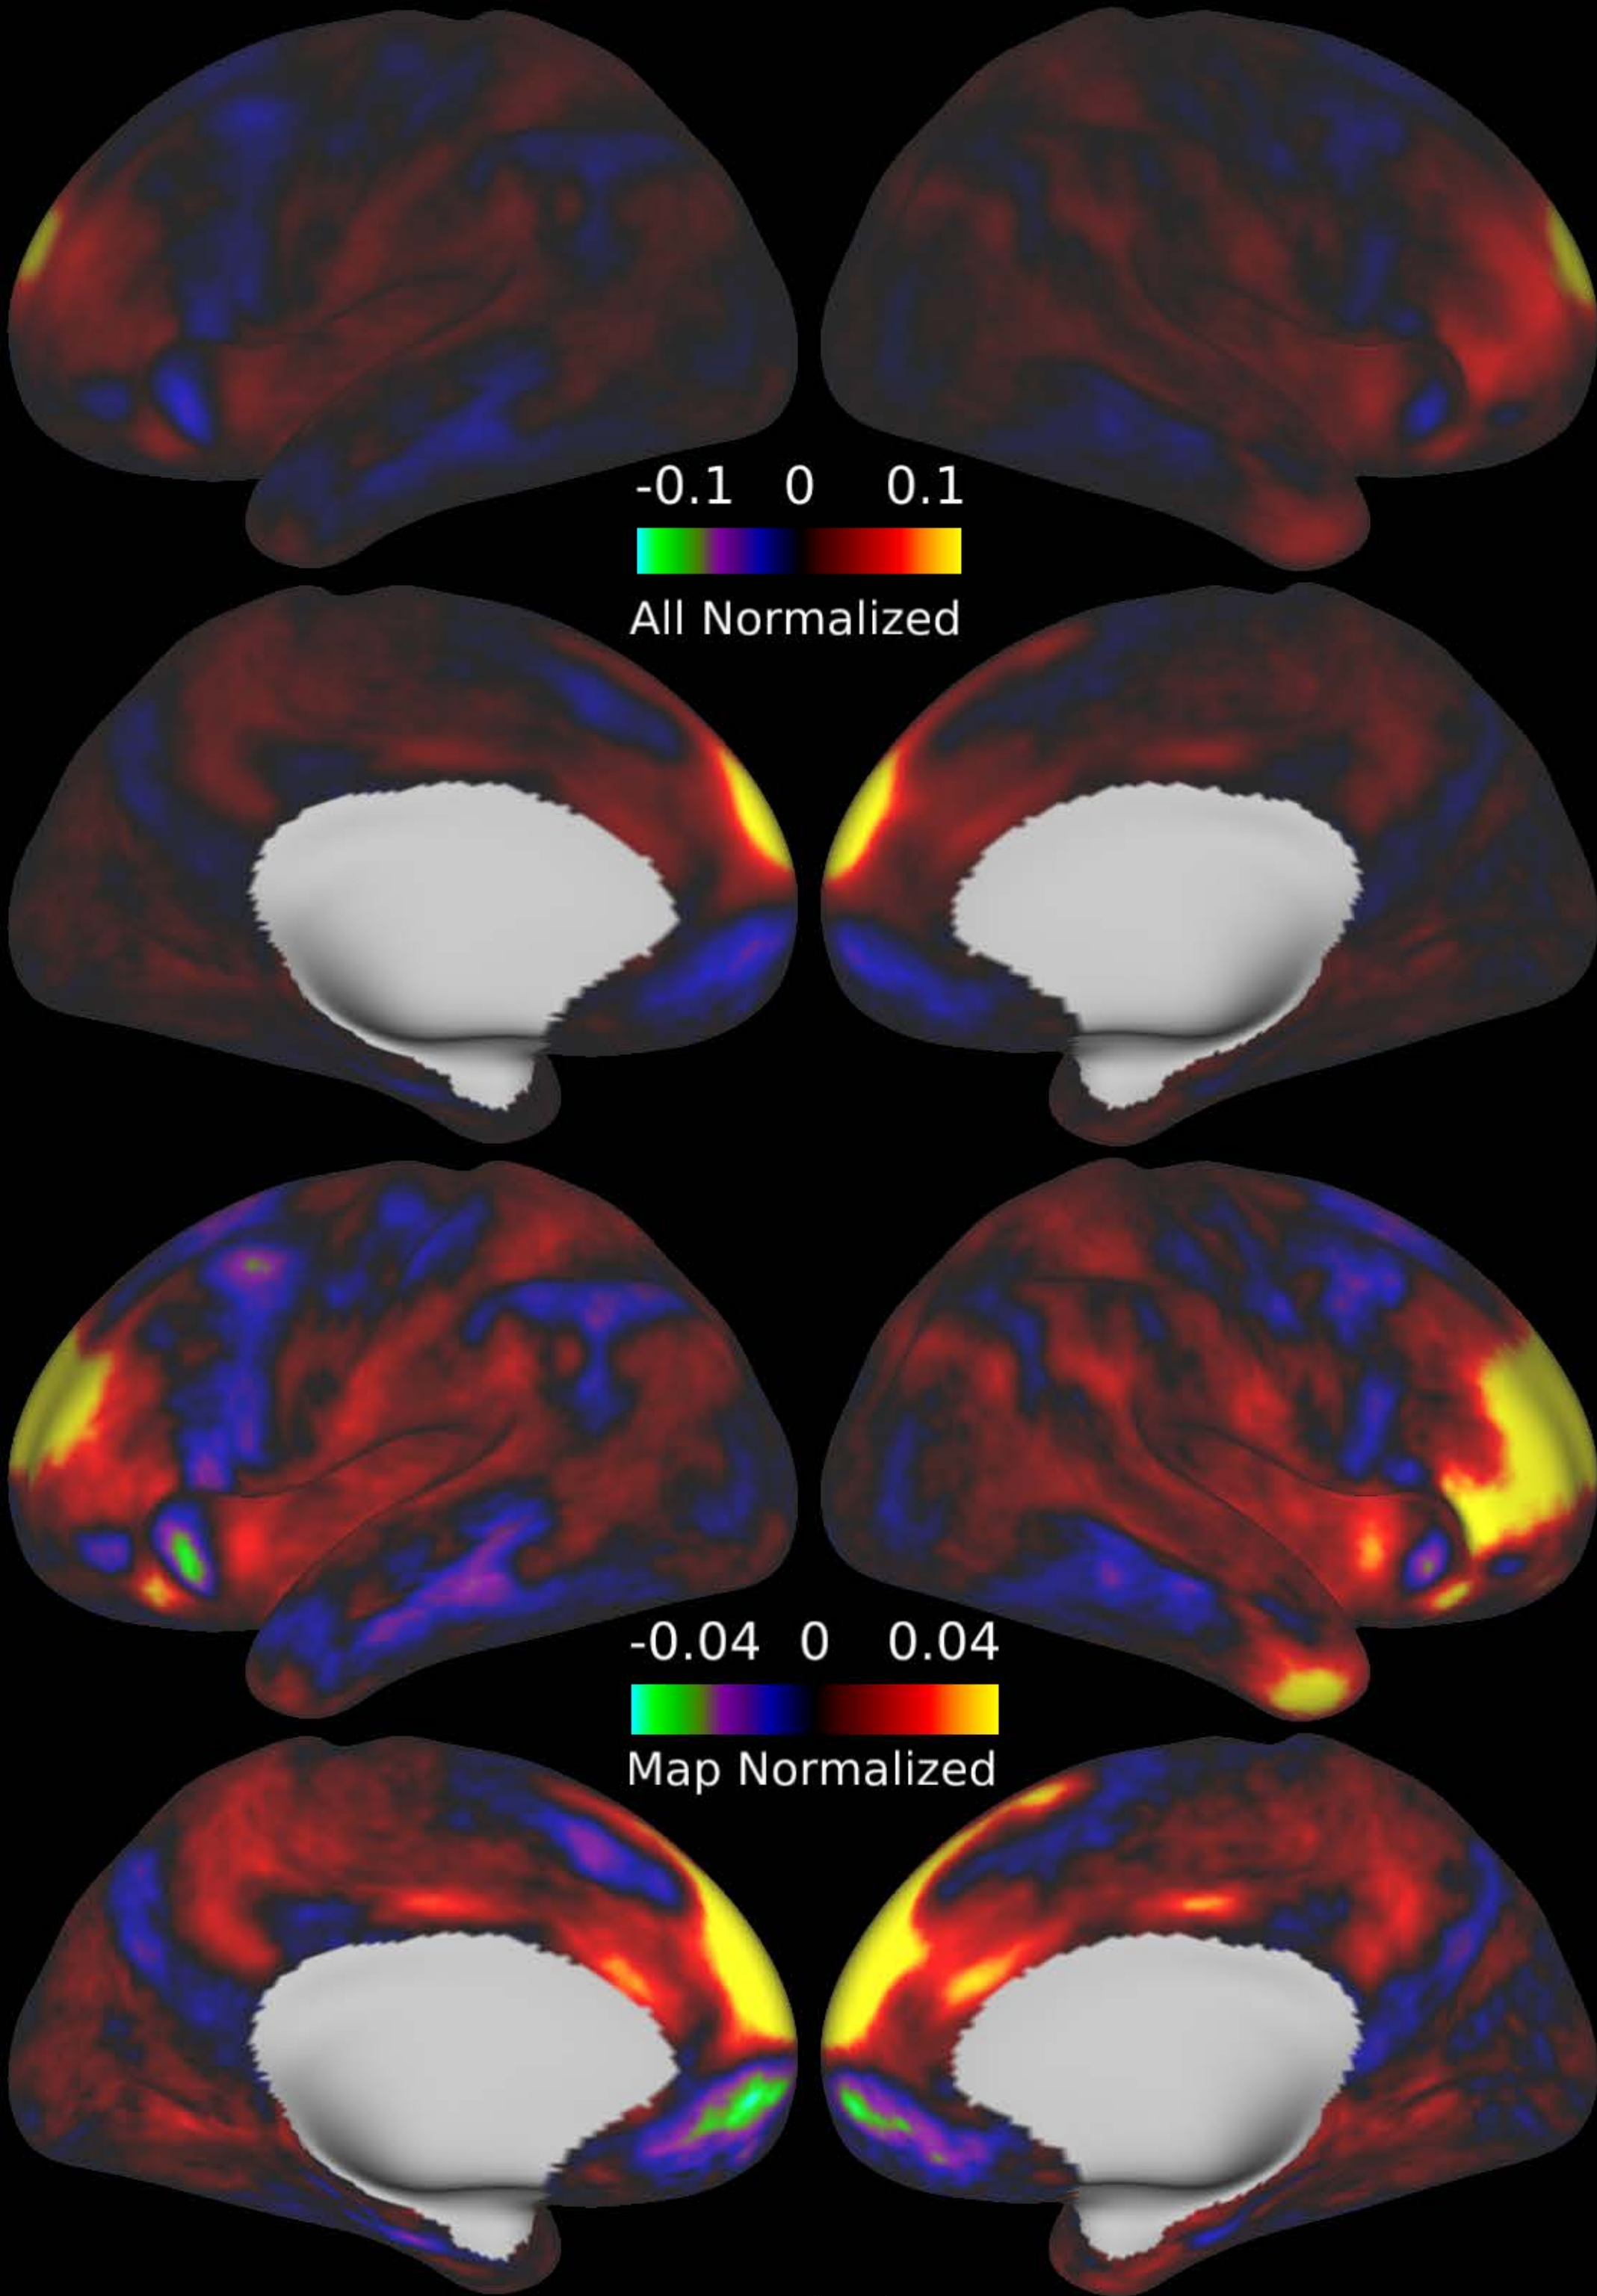

Hertz

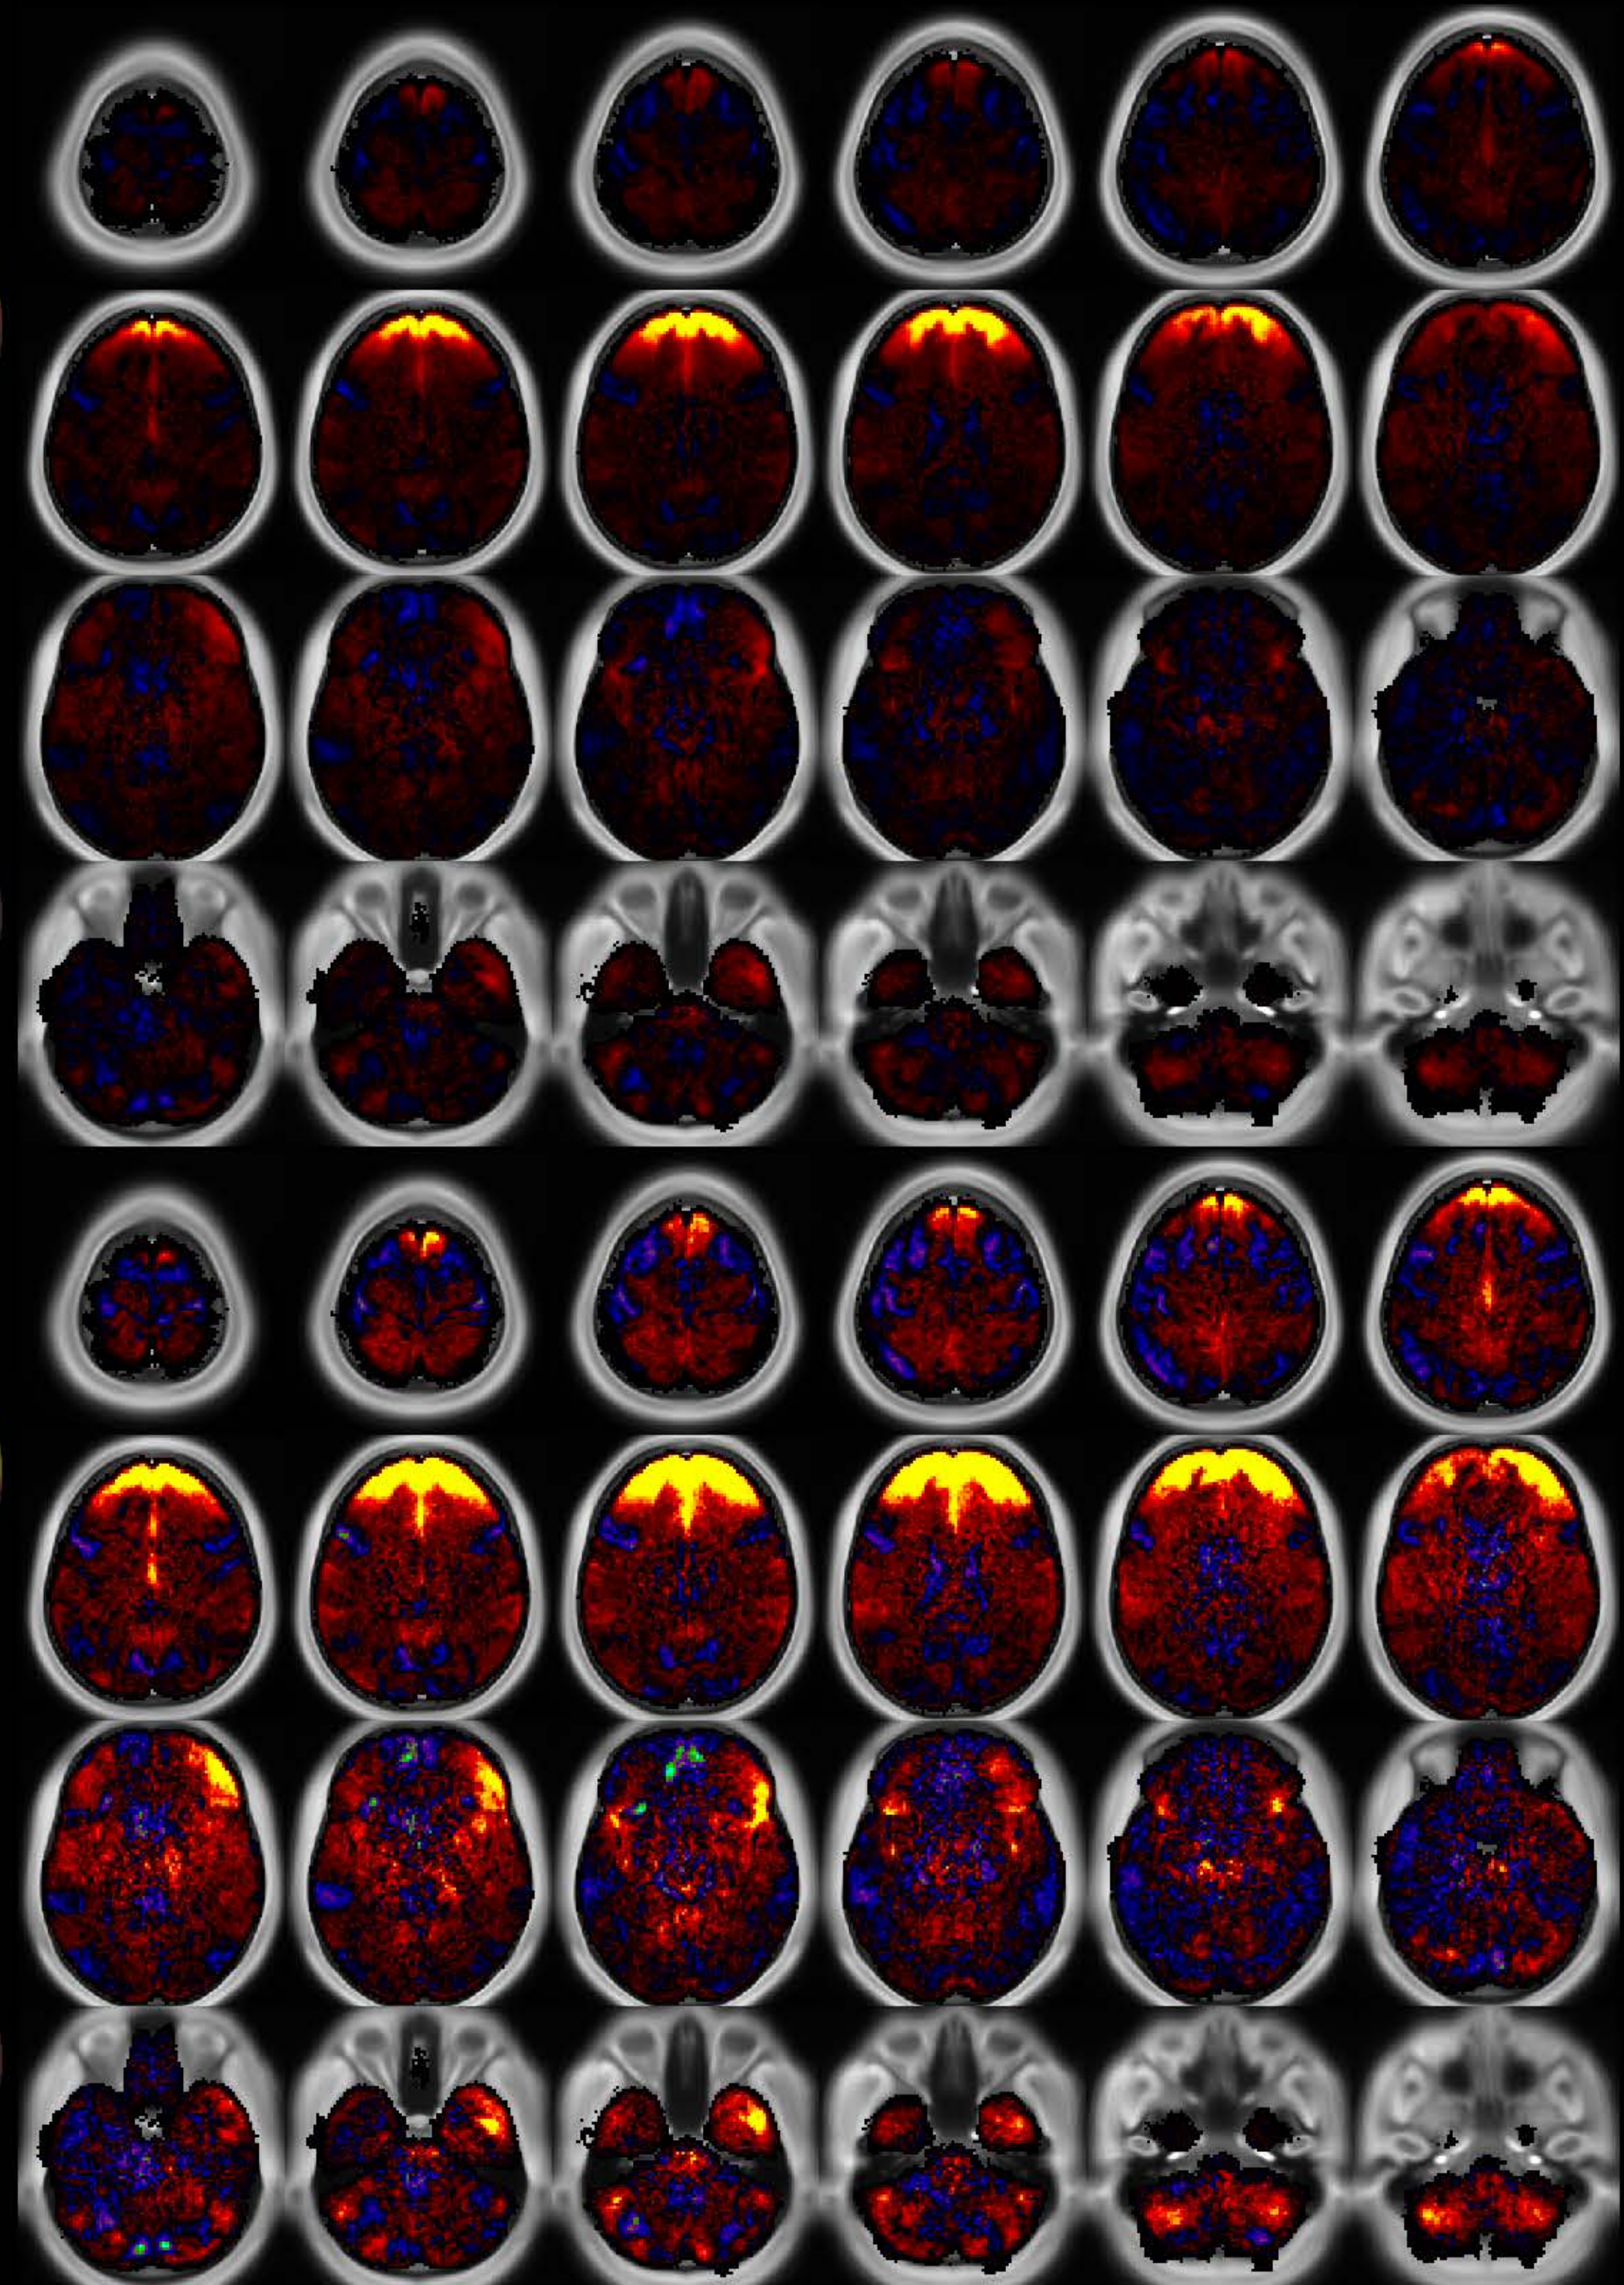

Seconds

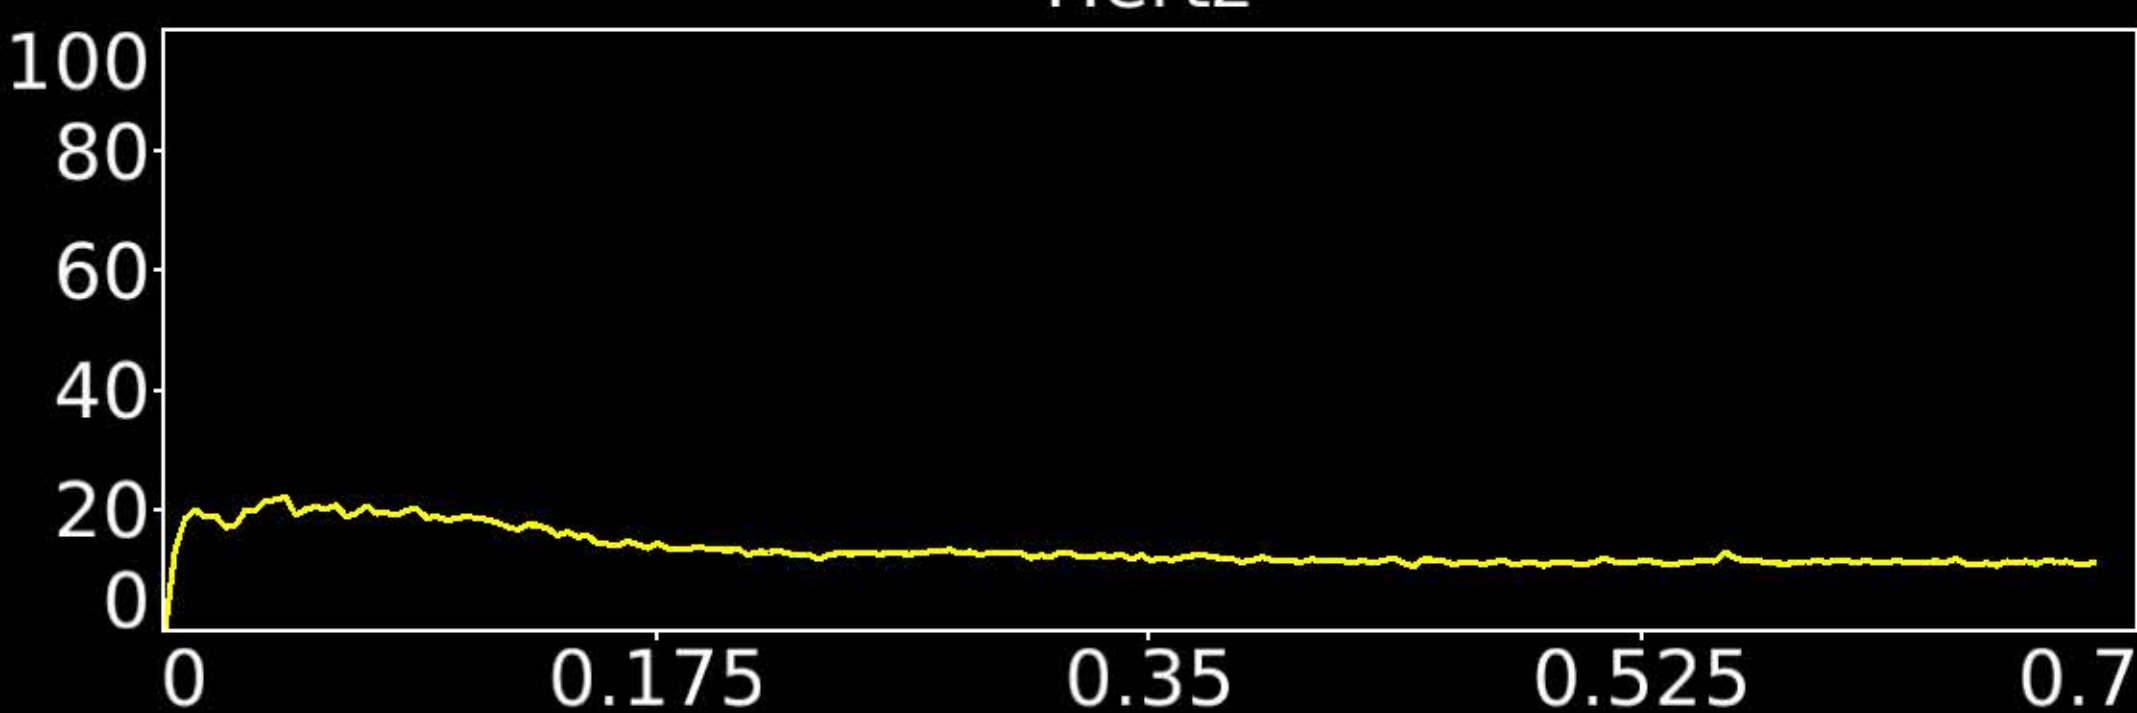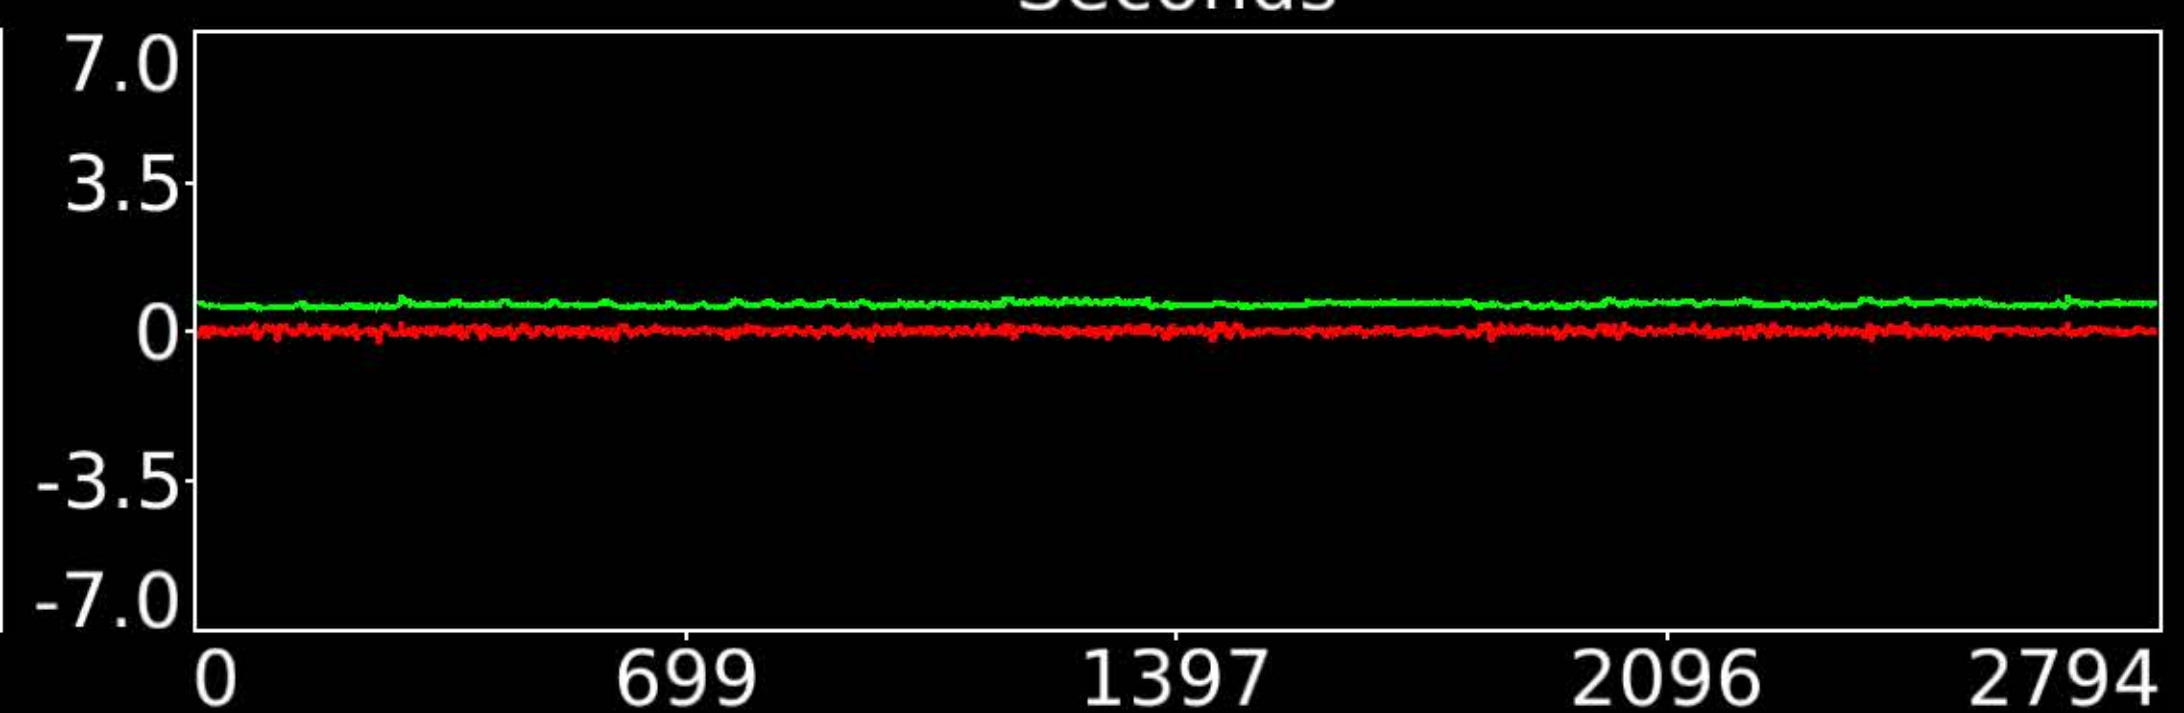

|                          |                            |                             |  |
|--------------------------|----------------------------|-----------------------------|--|
| Number & Class: 55 Noise |                            | Name: Coil?                 |  |
| RVT Correlated: No       | DVARS Dip Associated: Yes  | Cross-Subject Variable: Yes |  |
| Single Subject: Yes      | % Variance Explained: 0.78 | Globality Index: 1.25       |  |
| Task Component: 64       | Rest Component: 70         | Task Modulated: No          |  |

Rationale: Spatial map is a band across frontal cortex and white matter; could be related to coil; head motion; or eye motion



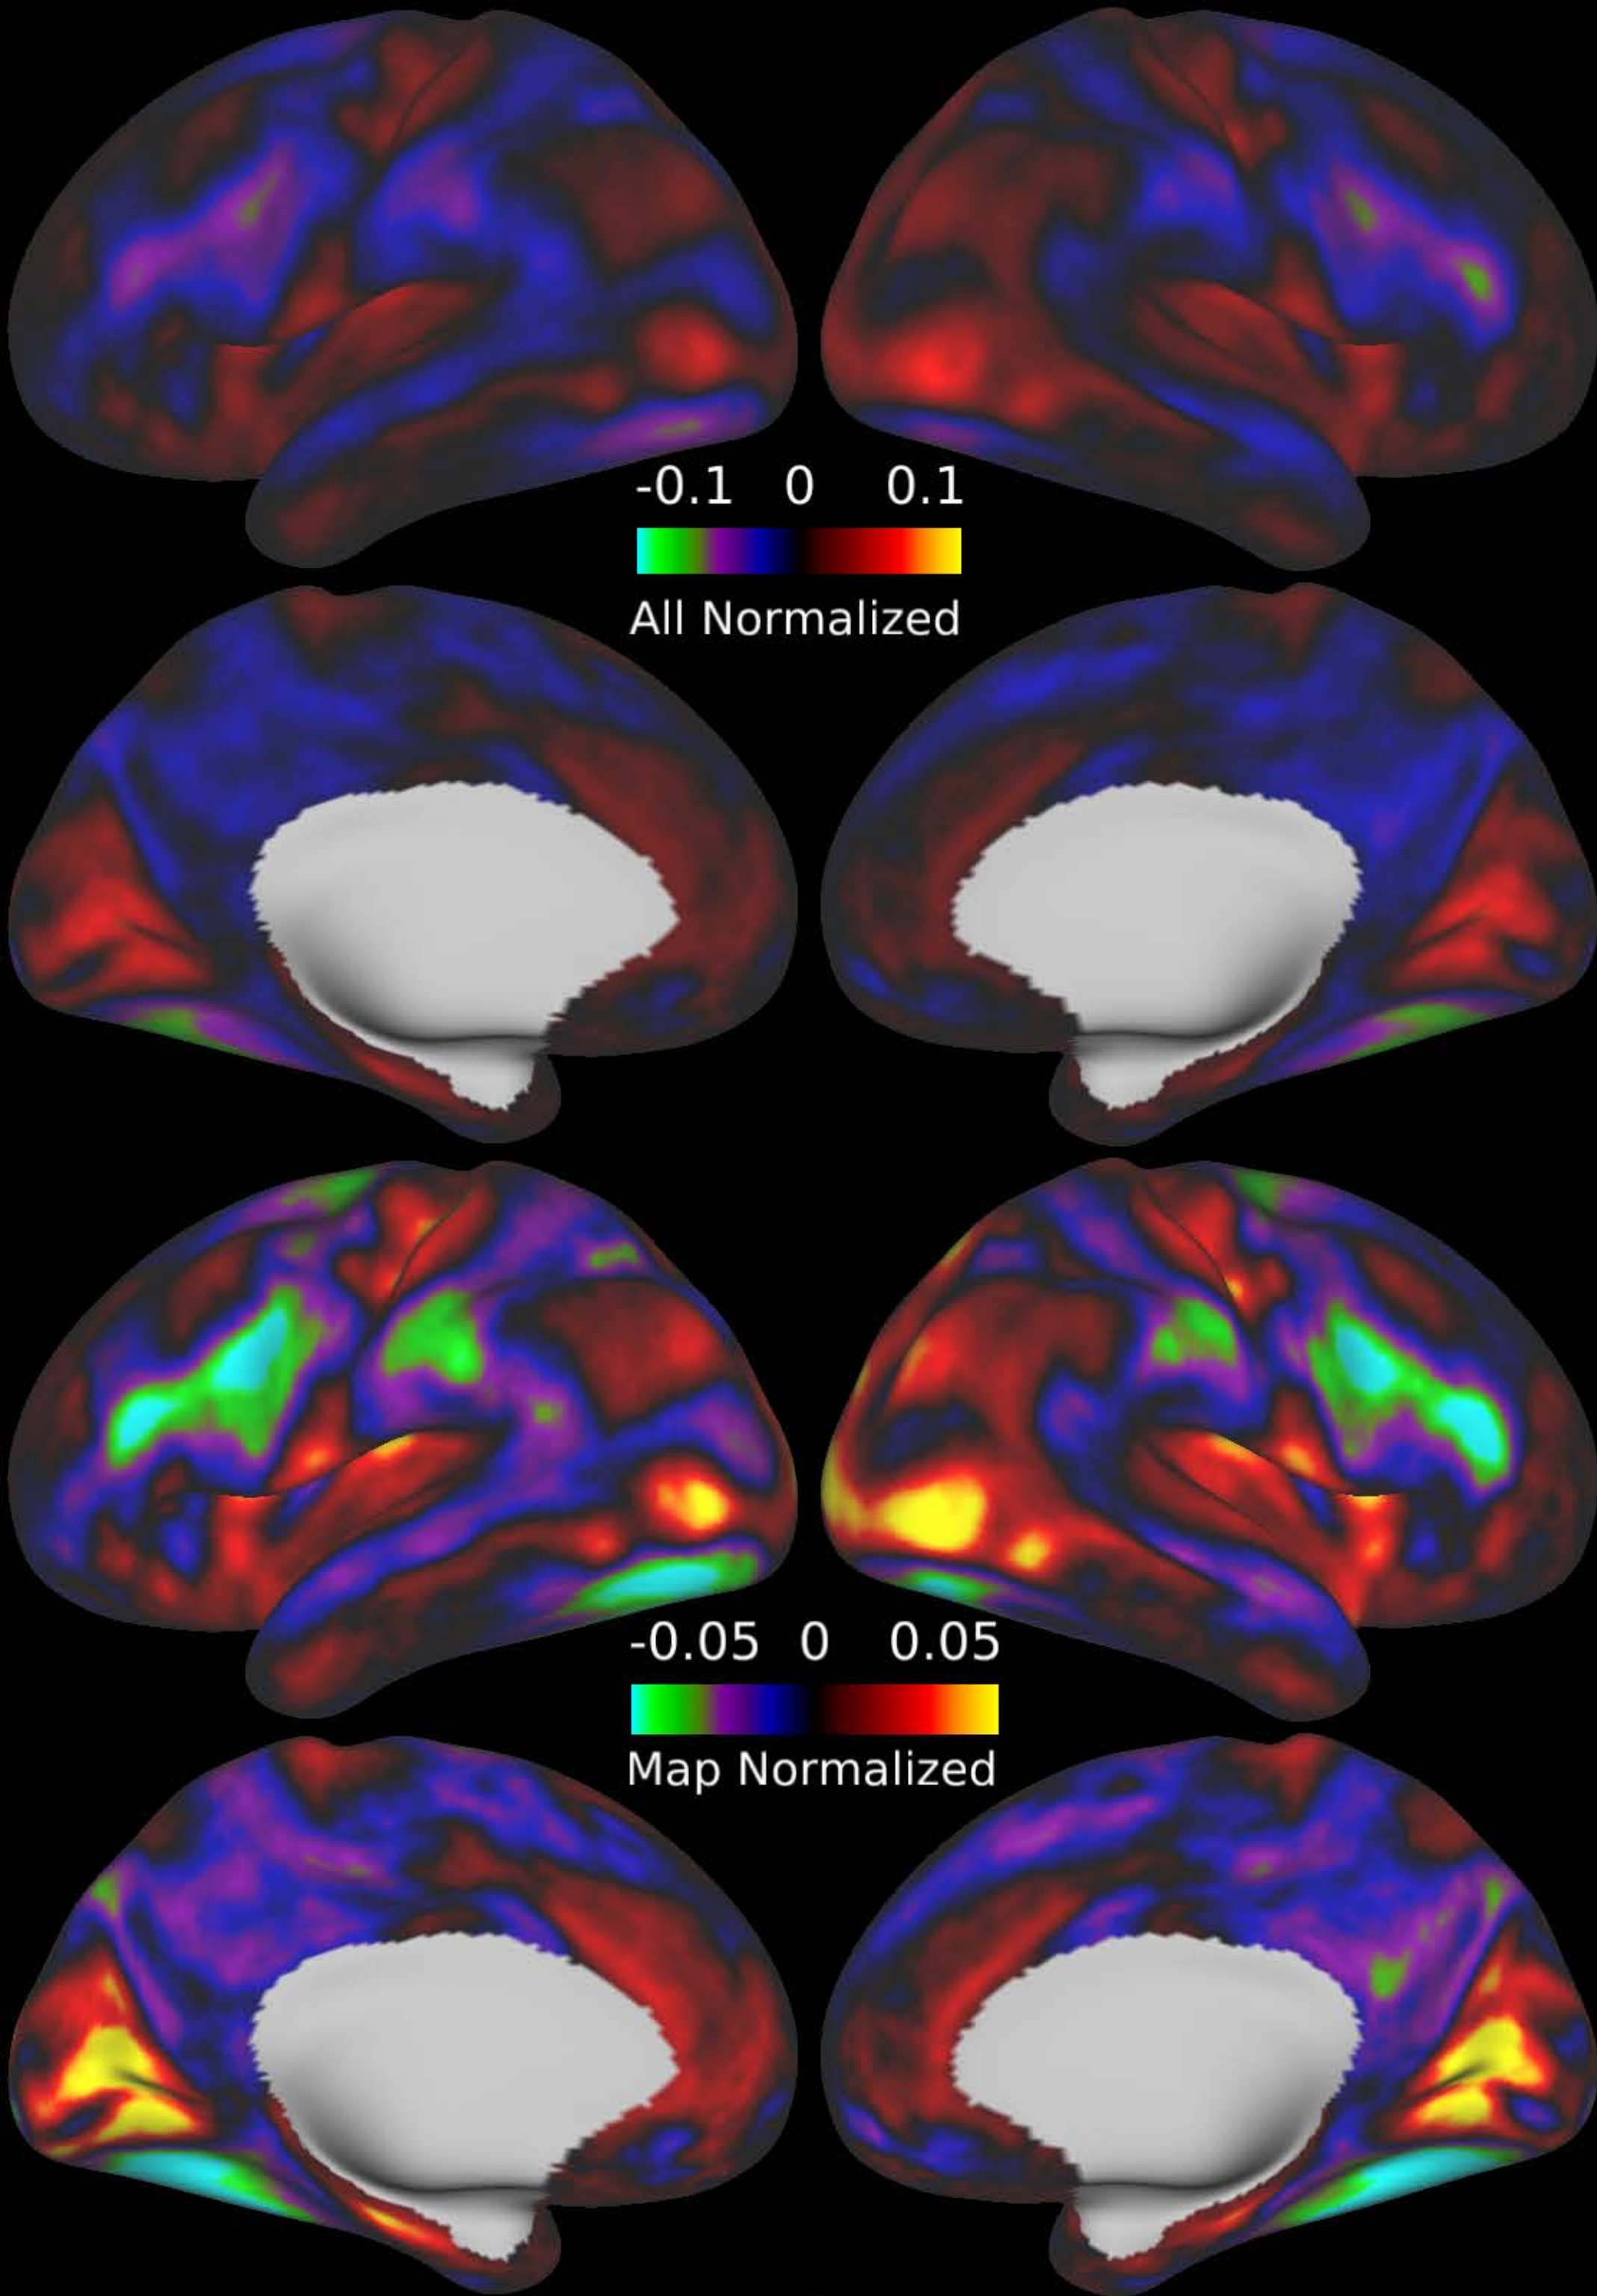

Hertz

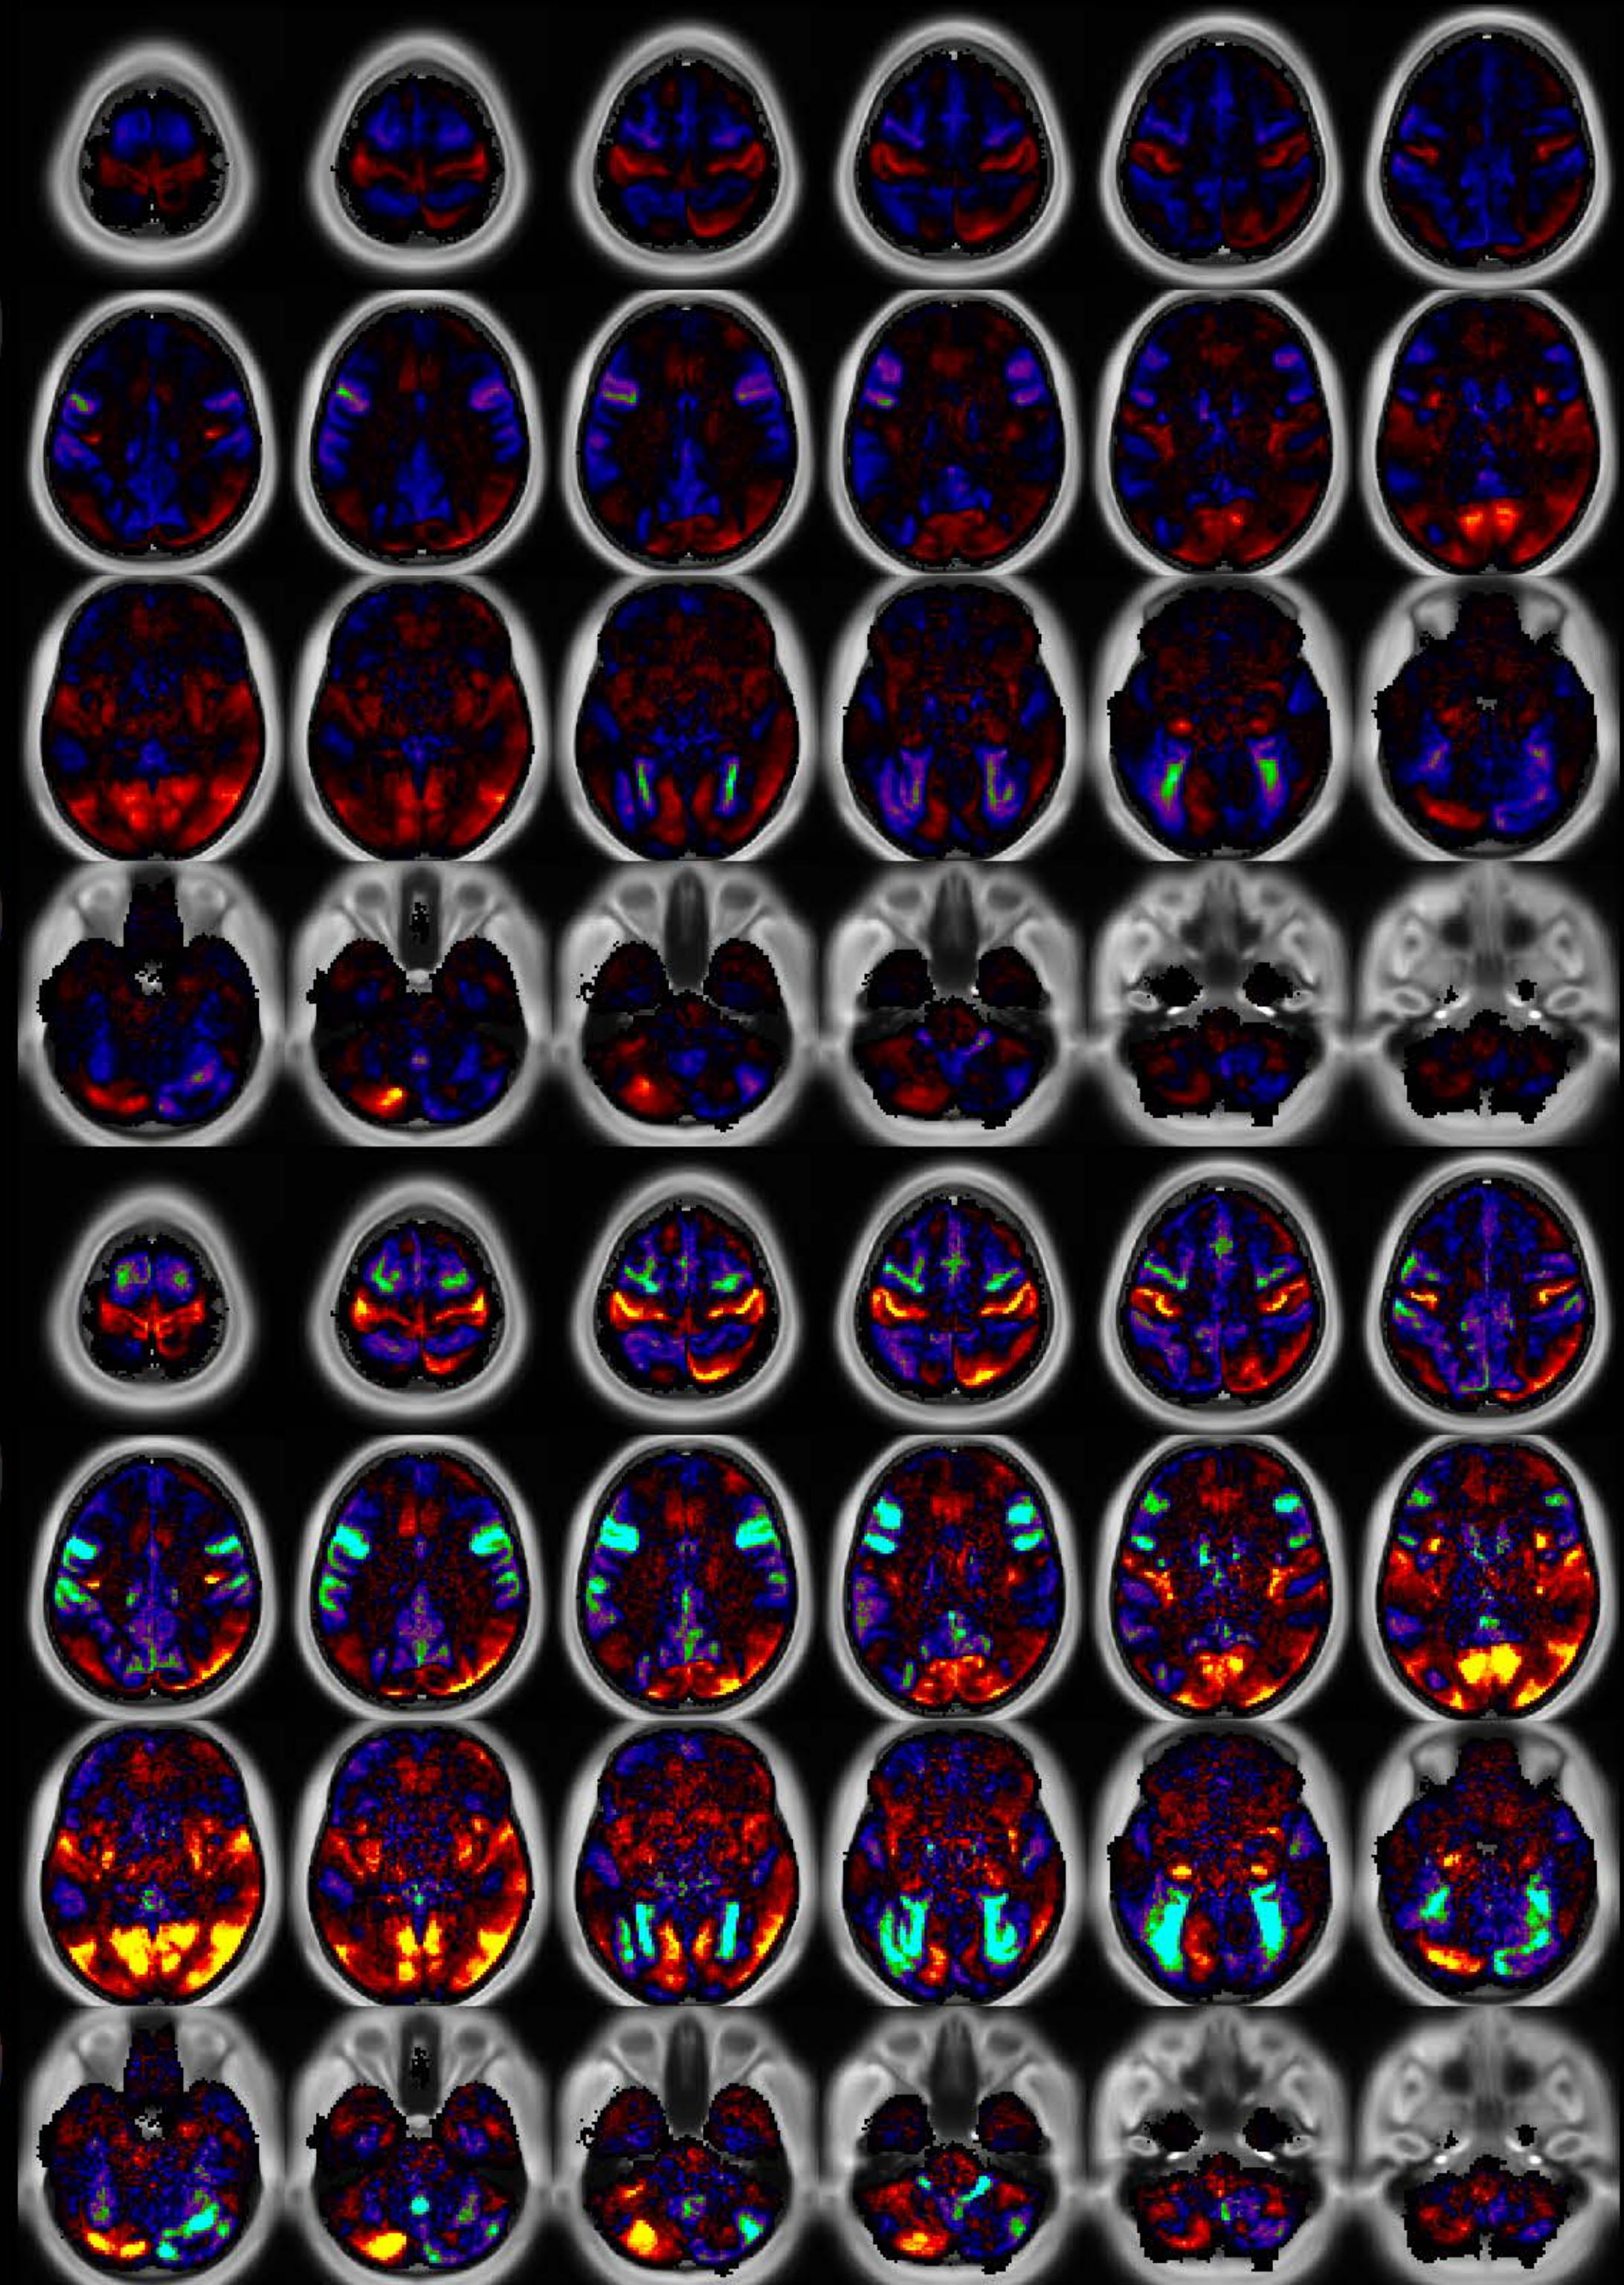

Seconds

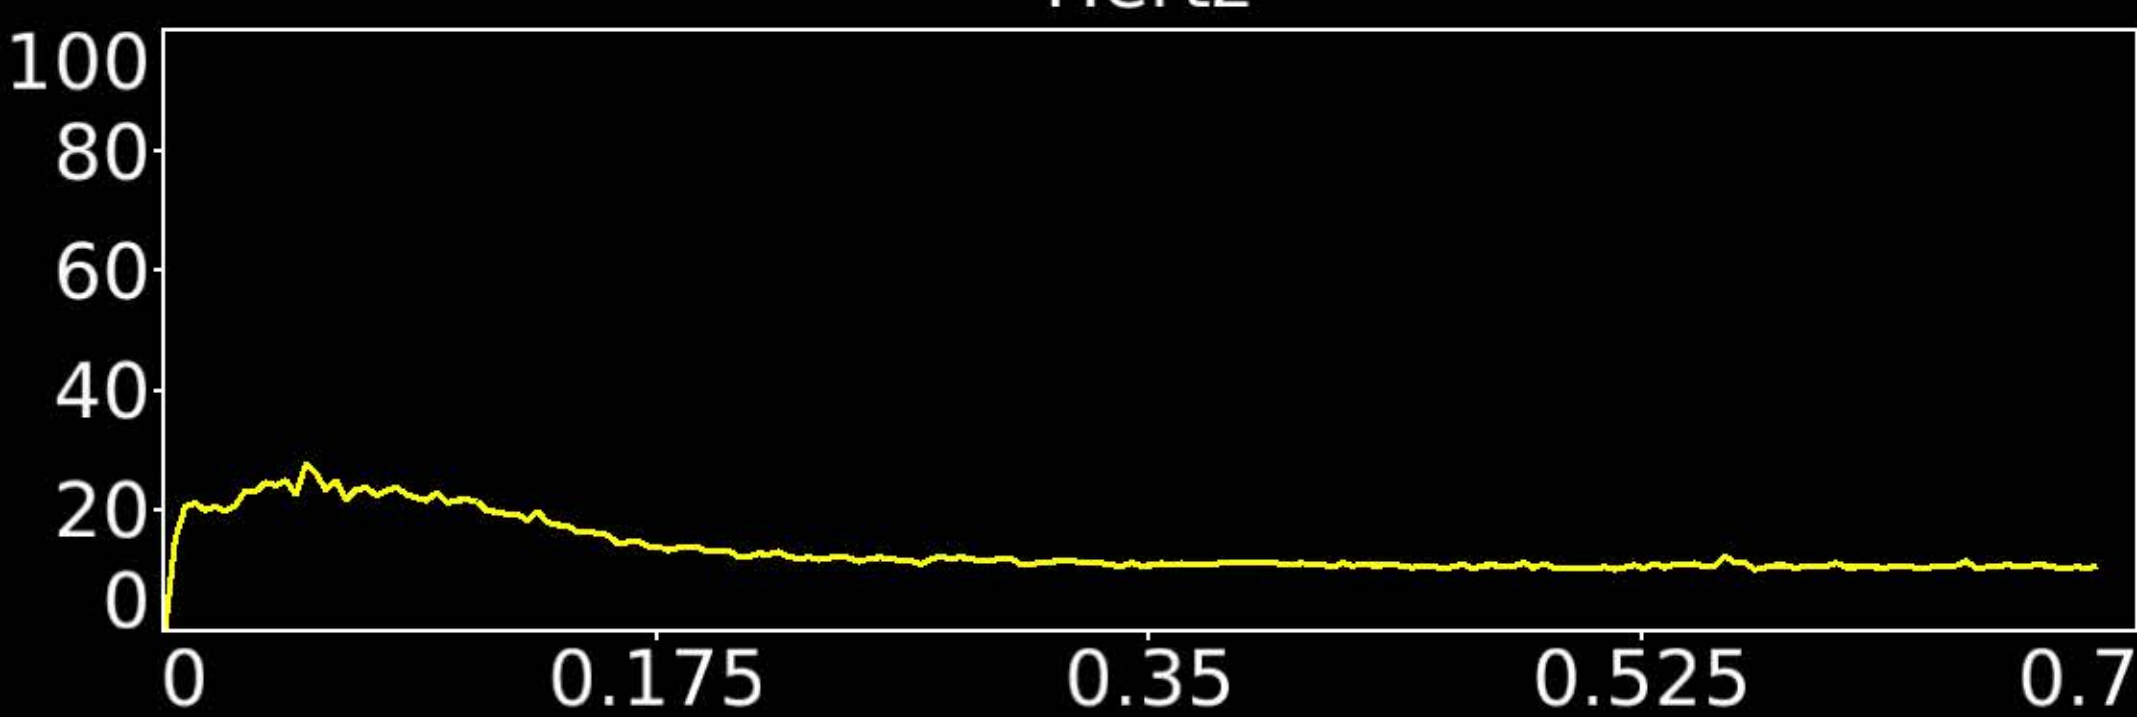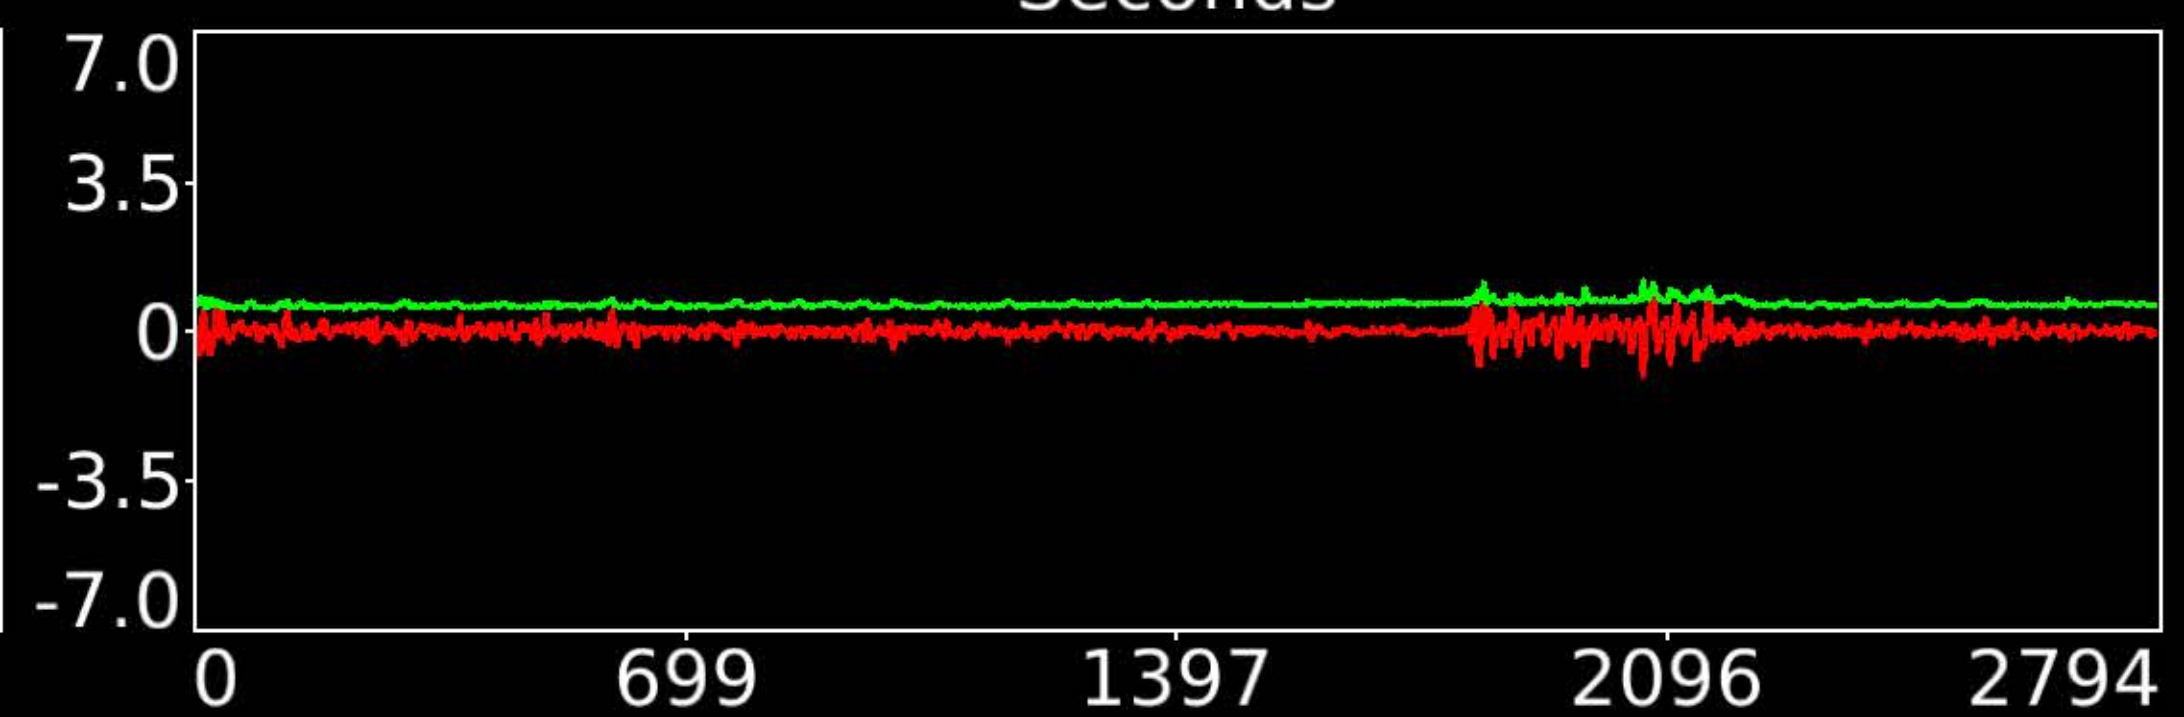

|                                                                                                   |                            |                            |  |
|---------------------------------------------------------------------------------------------------|----------------------------|----------------------------|--|
| Number & Class: 56 Signal                                                                         |                            | Name: Unknown Network      |  |
| RVT Correlated: No                                                                                | DVARS Dip Associated: No   | Cross-Subject Variable: No |  |
| Single Subject: No                                                                                | % Variance Explained: 0.77 | Globality Index: 0.12      |  |
| Task Component: No                                                                                | Rest Component: No         | Task Modulated: No         |  |
| Rationale: Spatial map has elements of visuotopy and known RSNs though in an atypical arrangement |                            |                            |  |



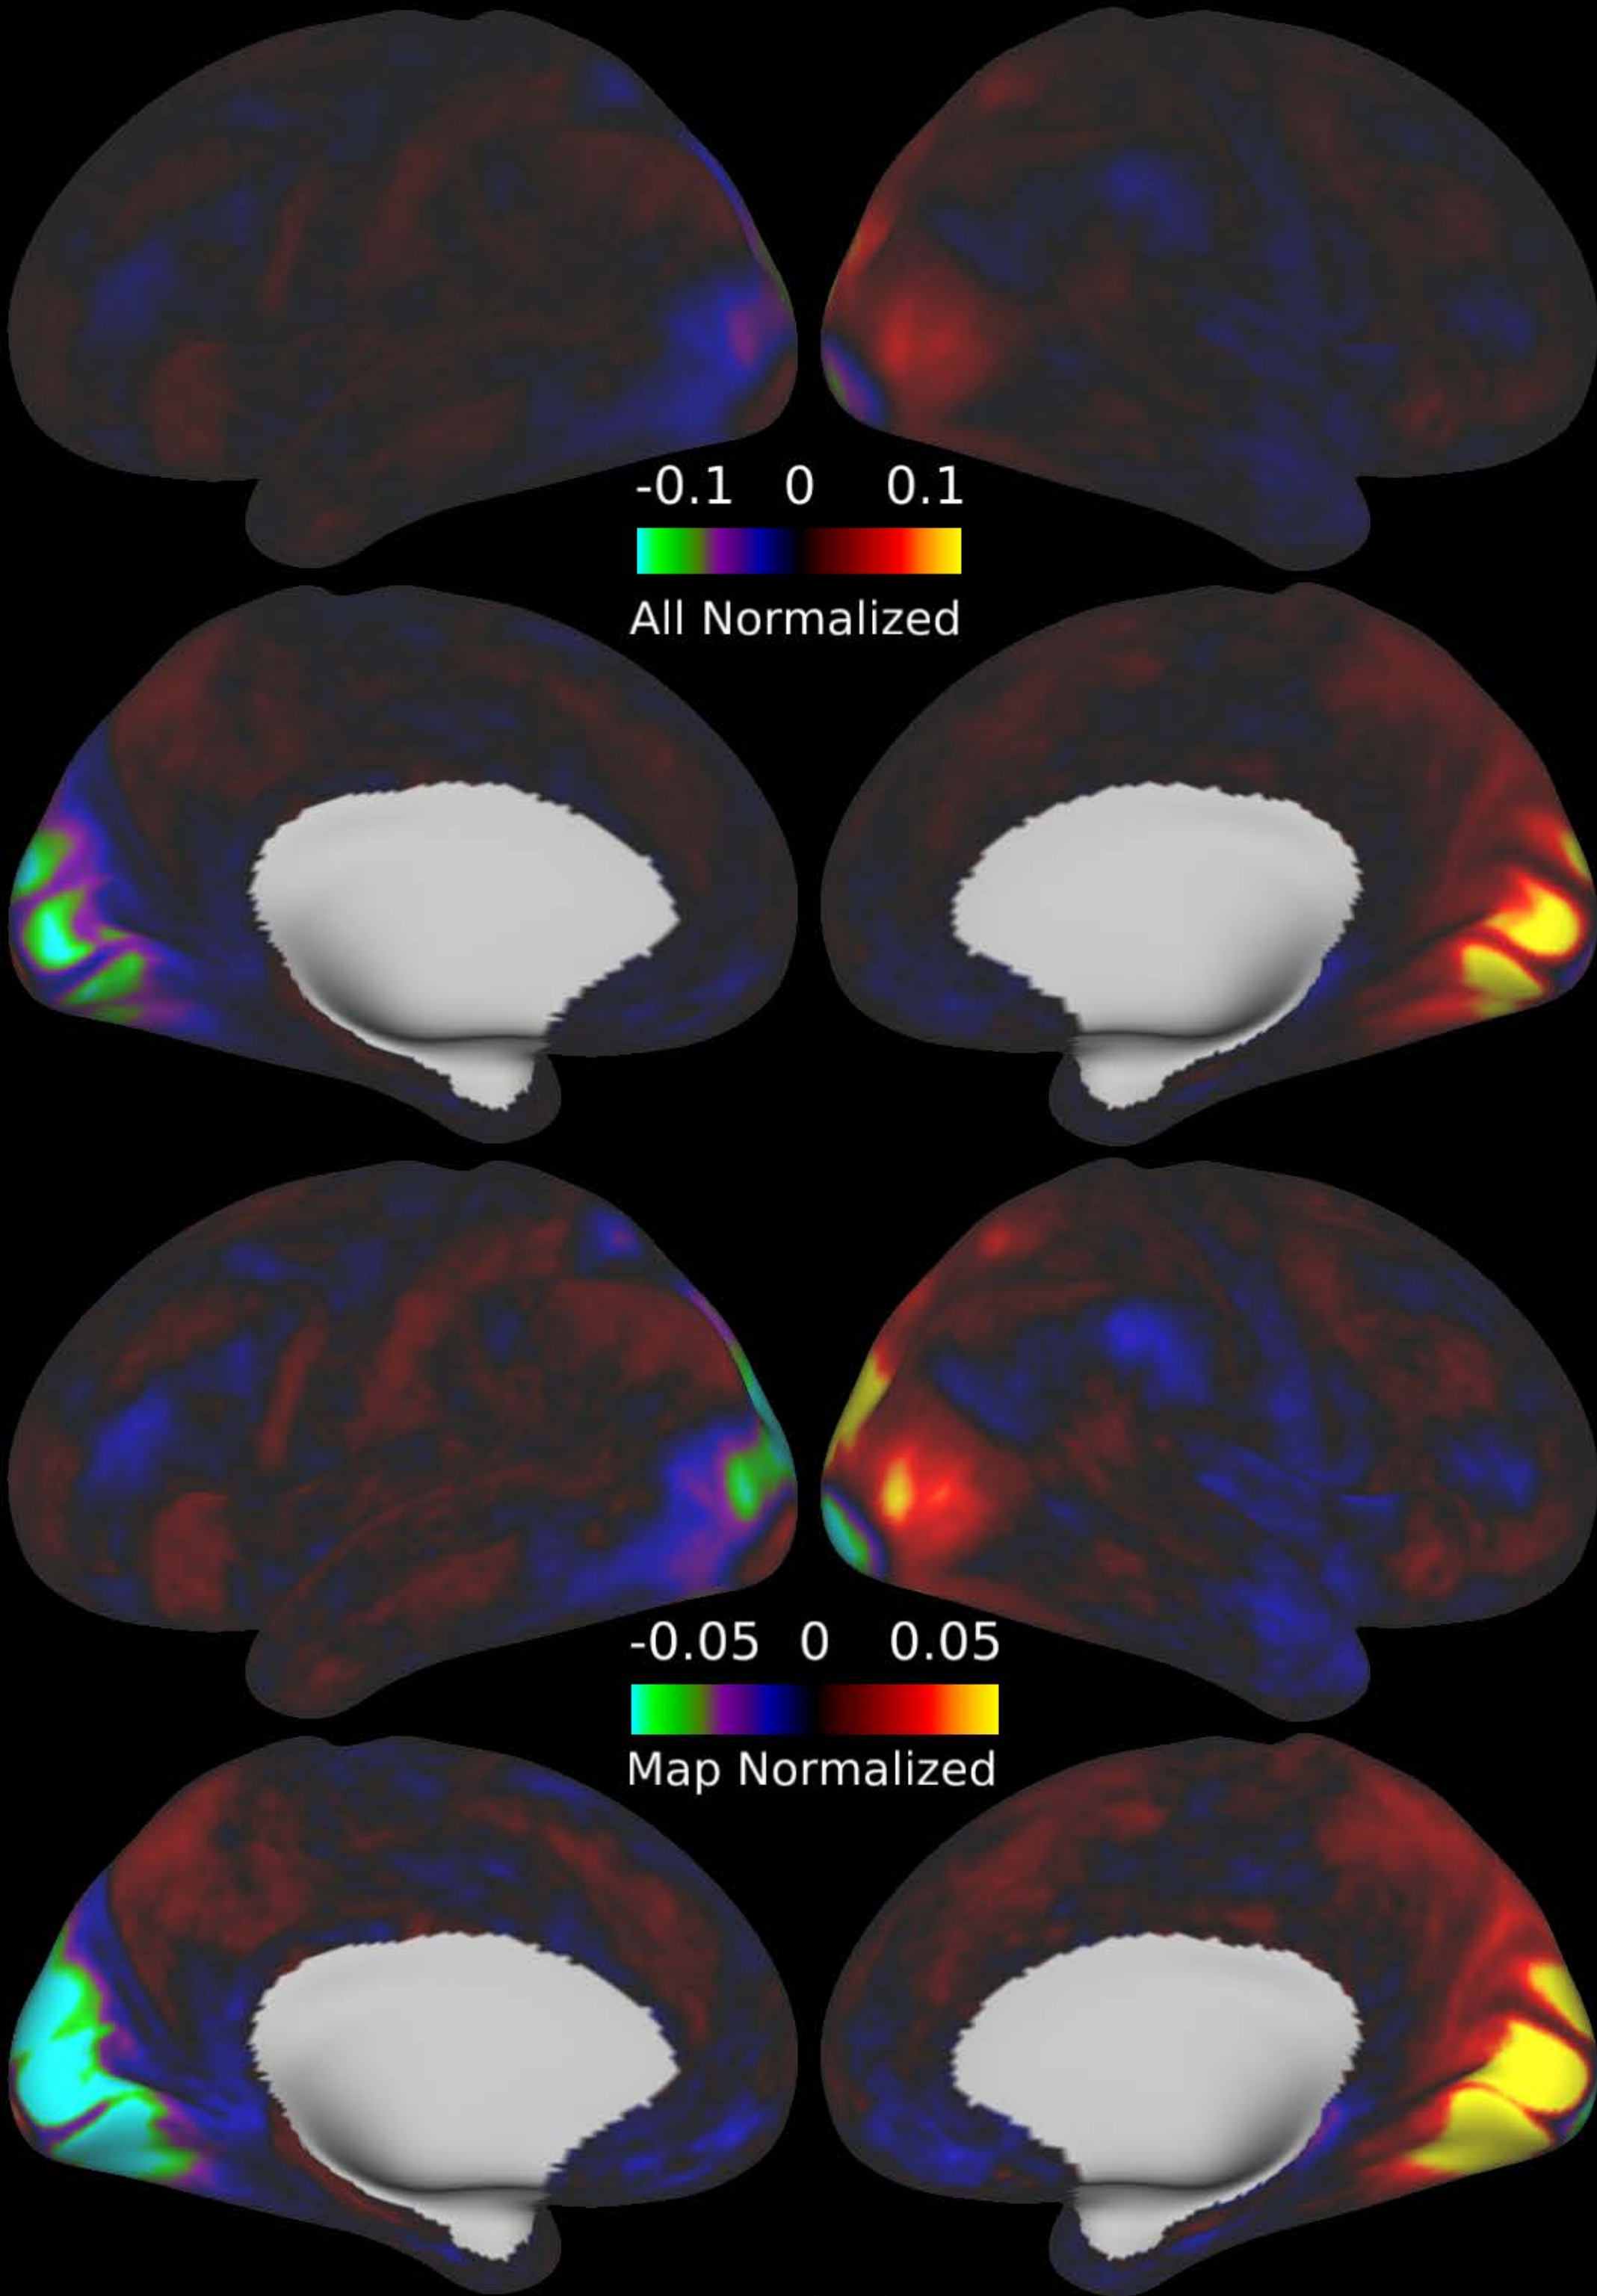

Hertz

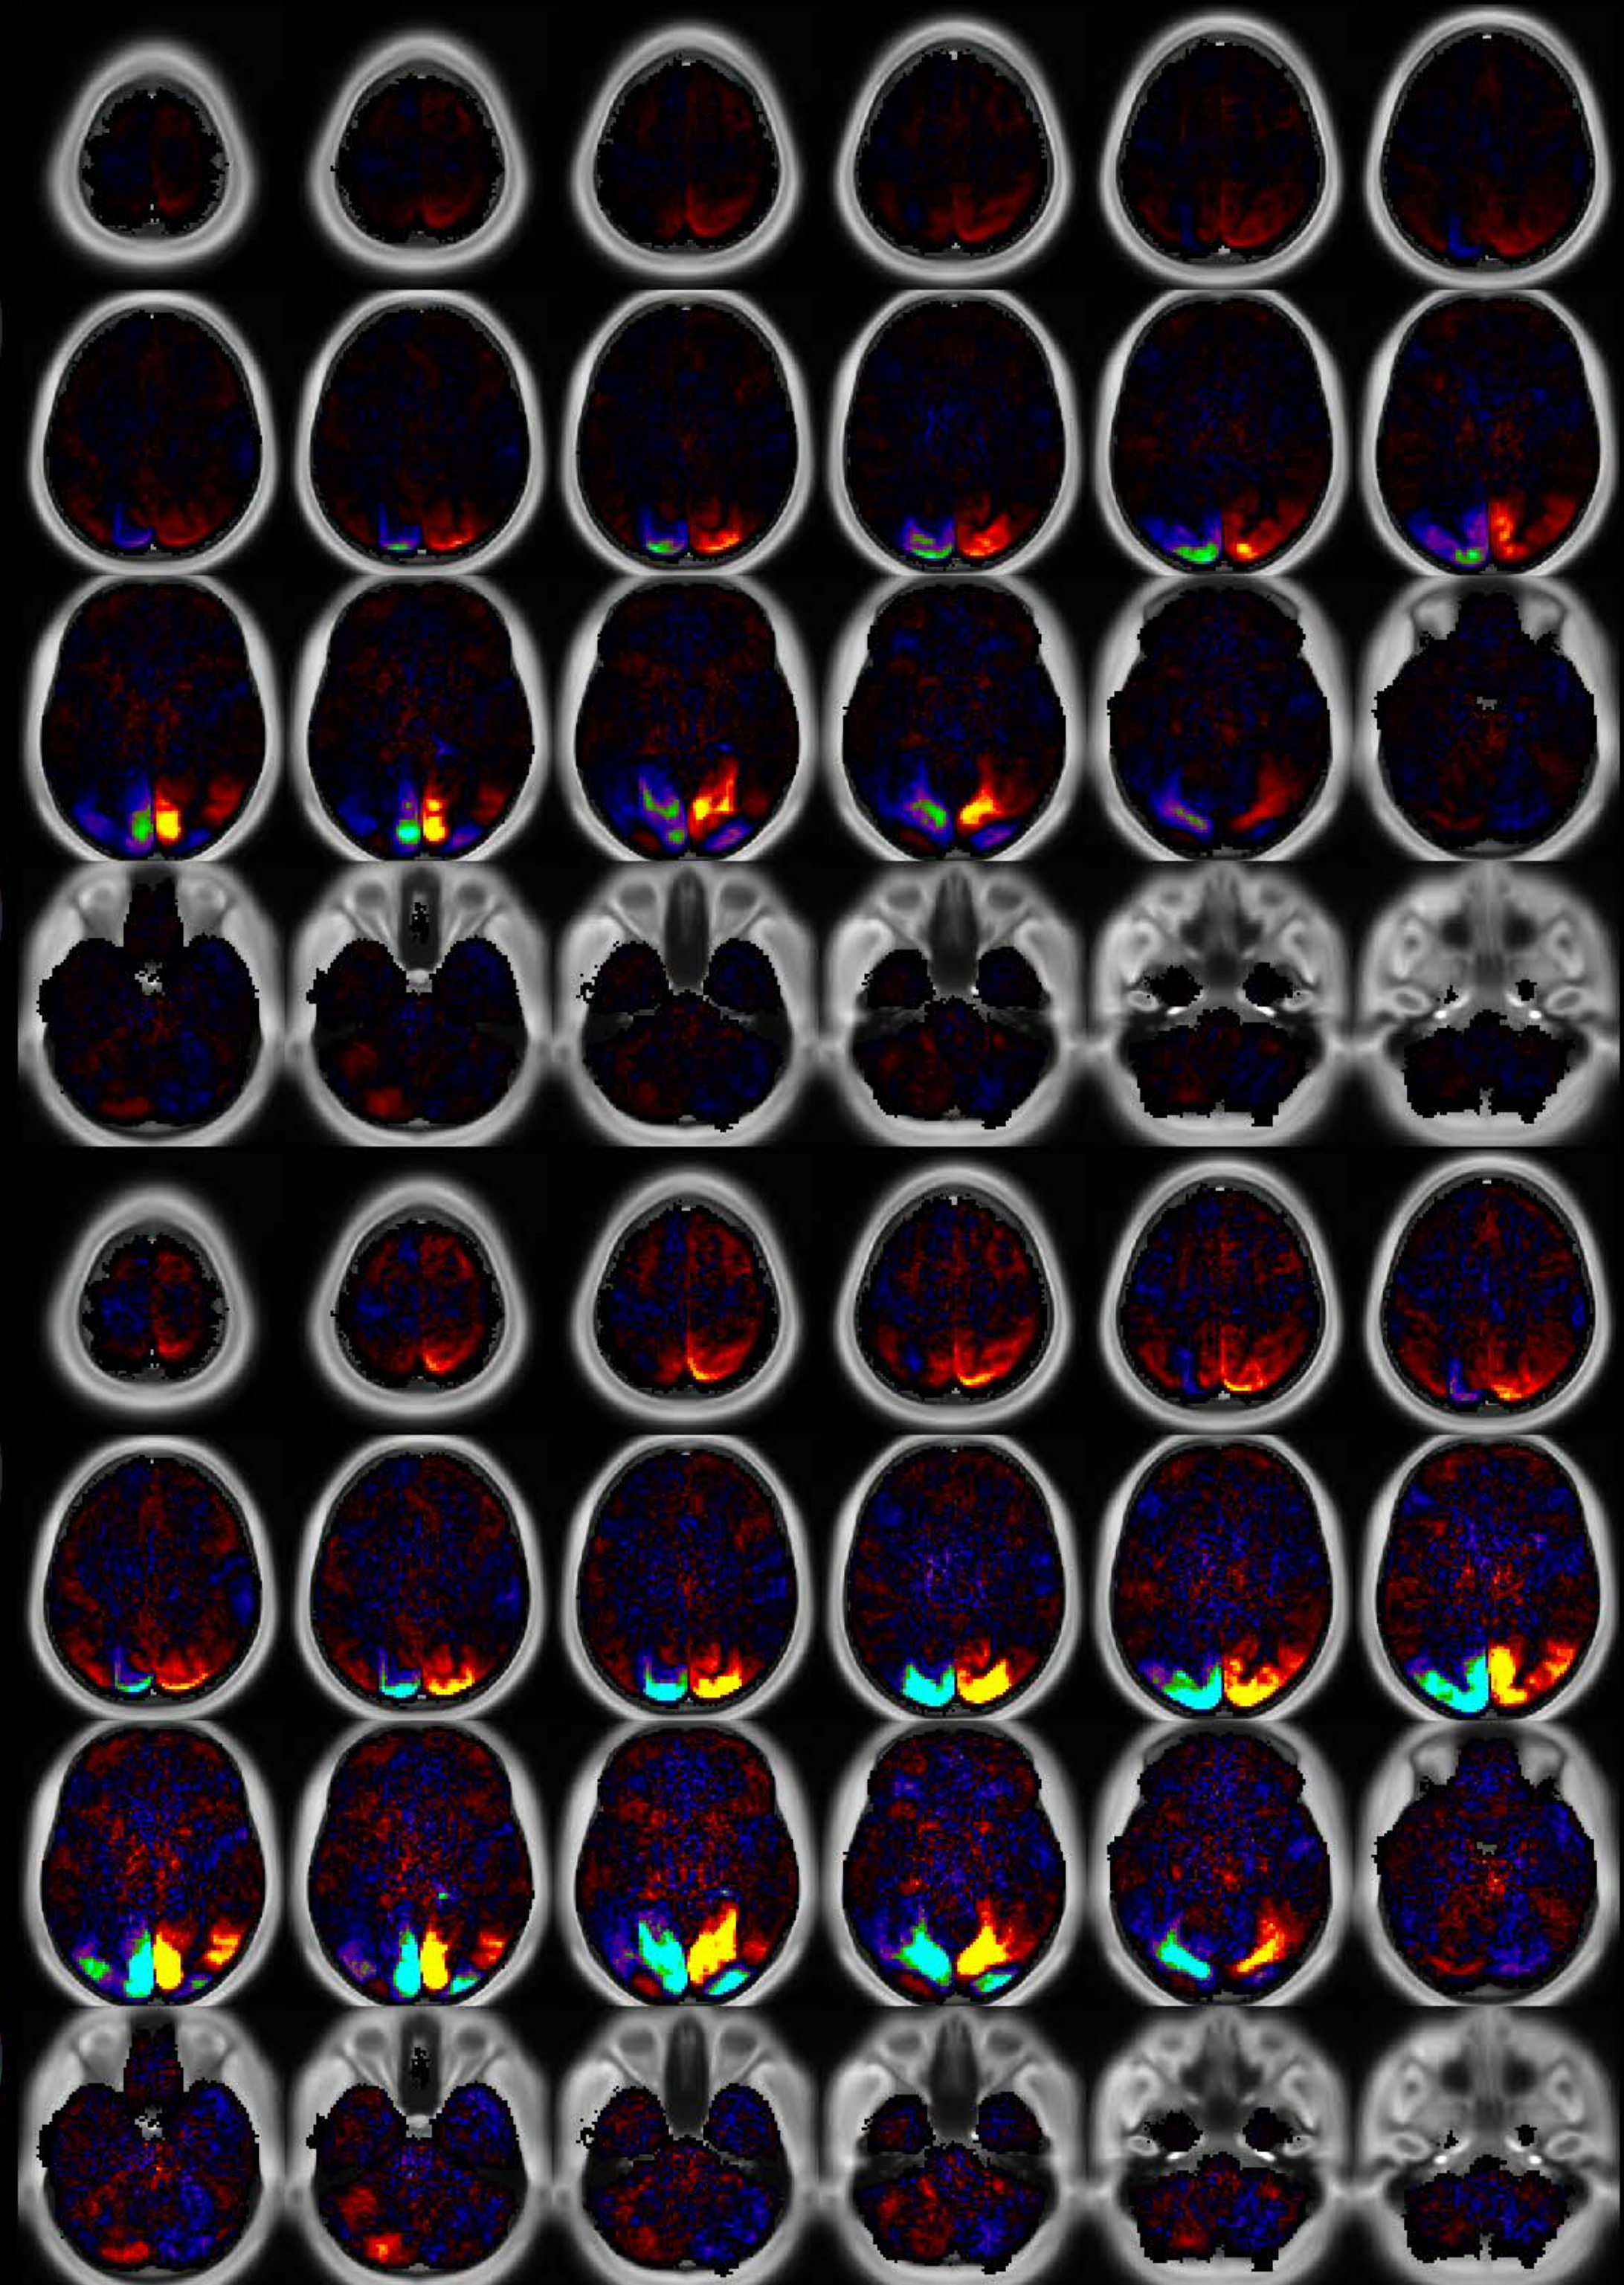

Seconds

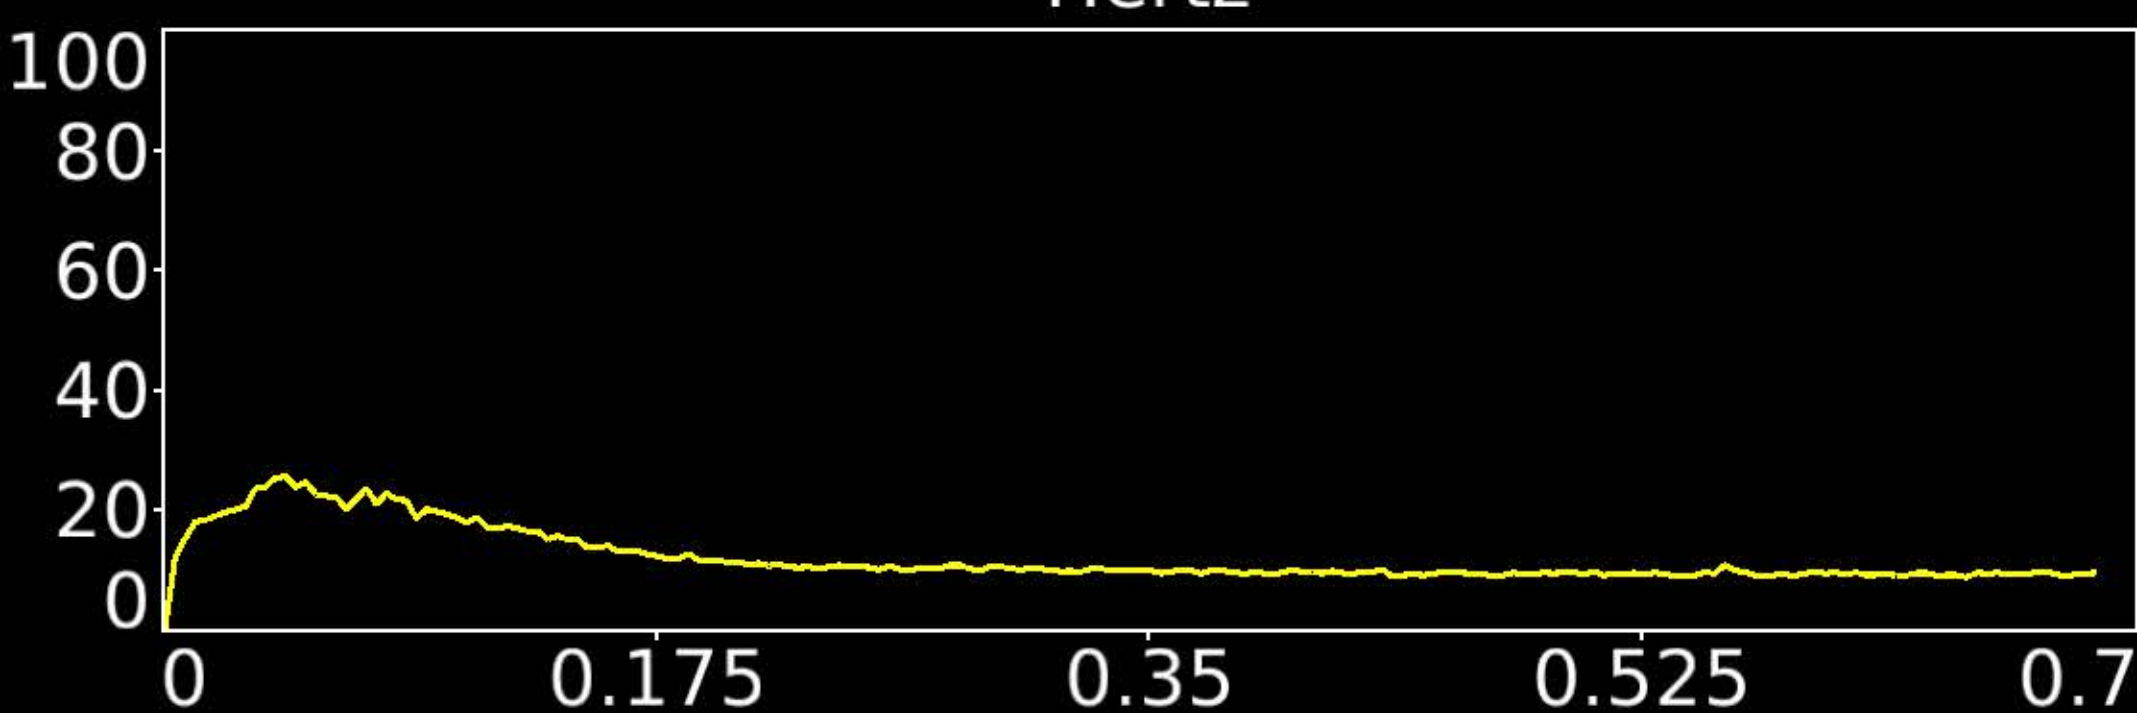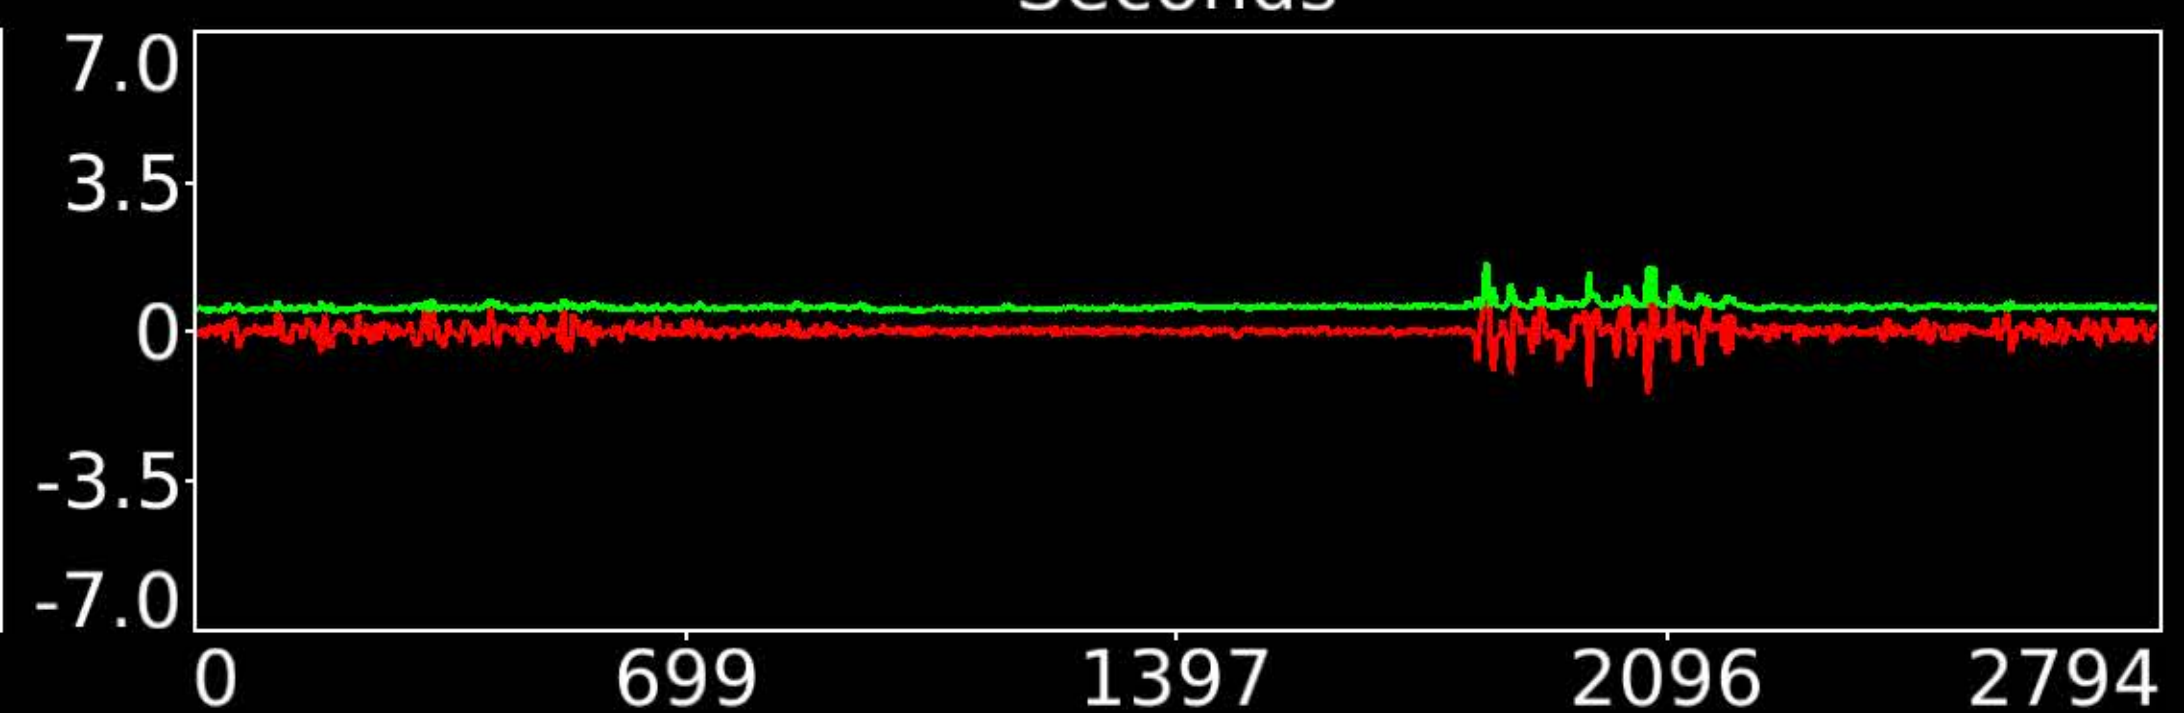

|                                                                                                                                             |                            |                                            |  |
|---------------------------------------------------------------------------------------------------------------------------------------------|----------------------------|--------------------------------------------|--|
| Number & Class: 57 Signal                                                                                                                   |                            | Name: Visuotopic: Paracentral Right > Left |  |
| RVT Correlated: No                                                                                                                          | DVARS Dip Associated: No   | Cross-Subject Variable: No                 |  |
| Single Subject: No                                                                                                                          | % Variance Explained: 0.63 | Globality Index: 0.29                      |  |
| Task Component: -69                                                                                                                         | Rest Component: 84         | Task Modulated: Social                     |  |
| Rationale: Spatial map includes positive and negative patches that respect known retinotopic visual organization (Peripheral Right vs Left) |                            |                                            |  |



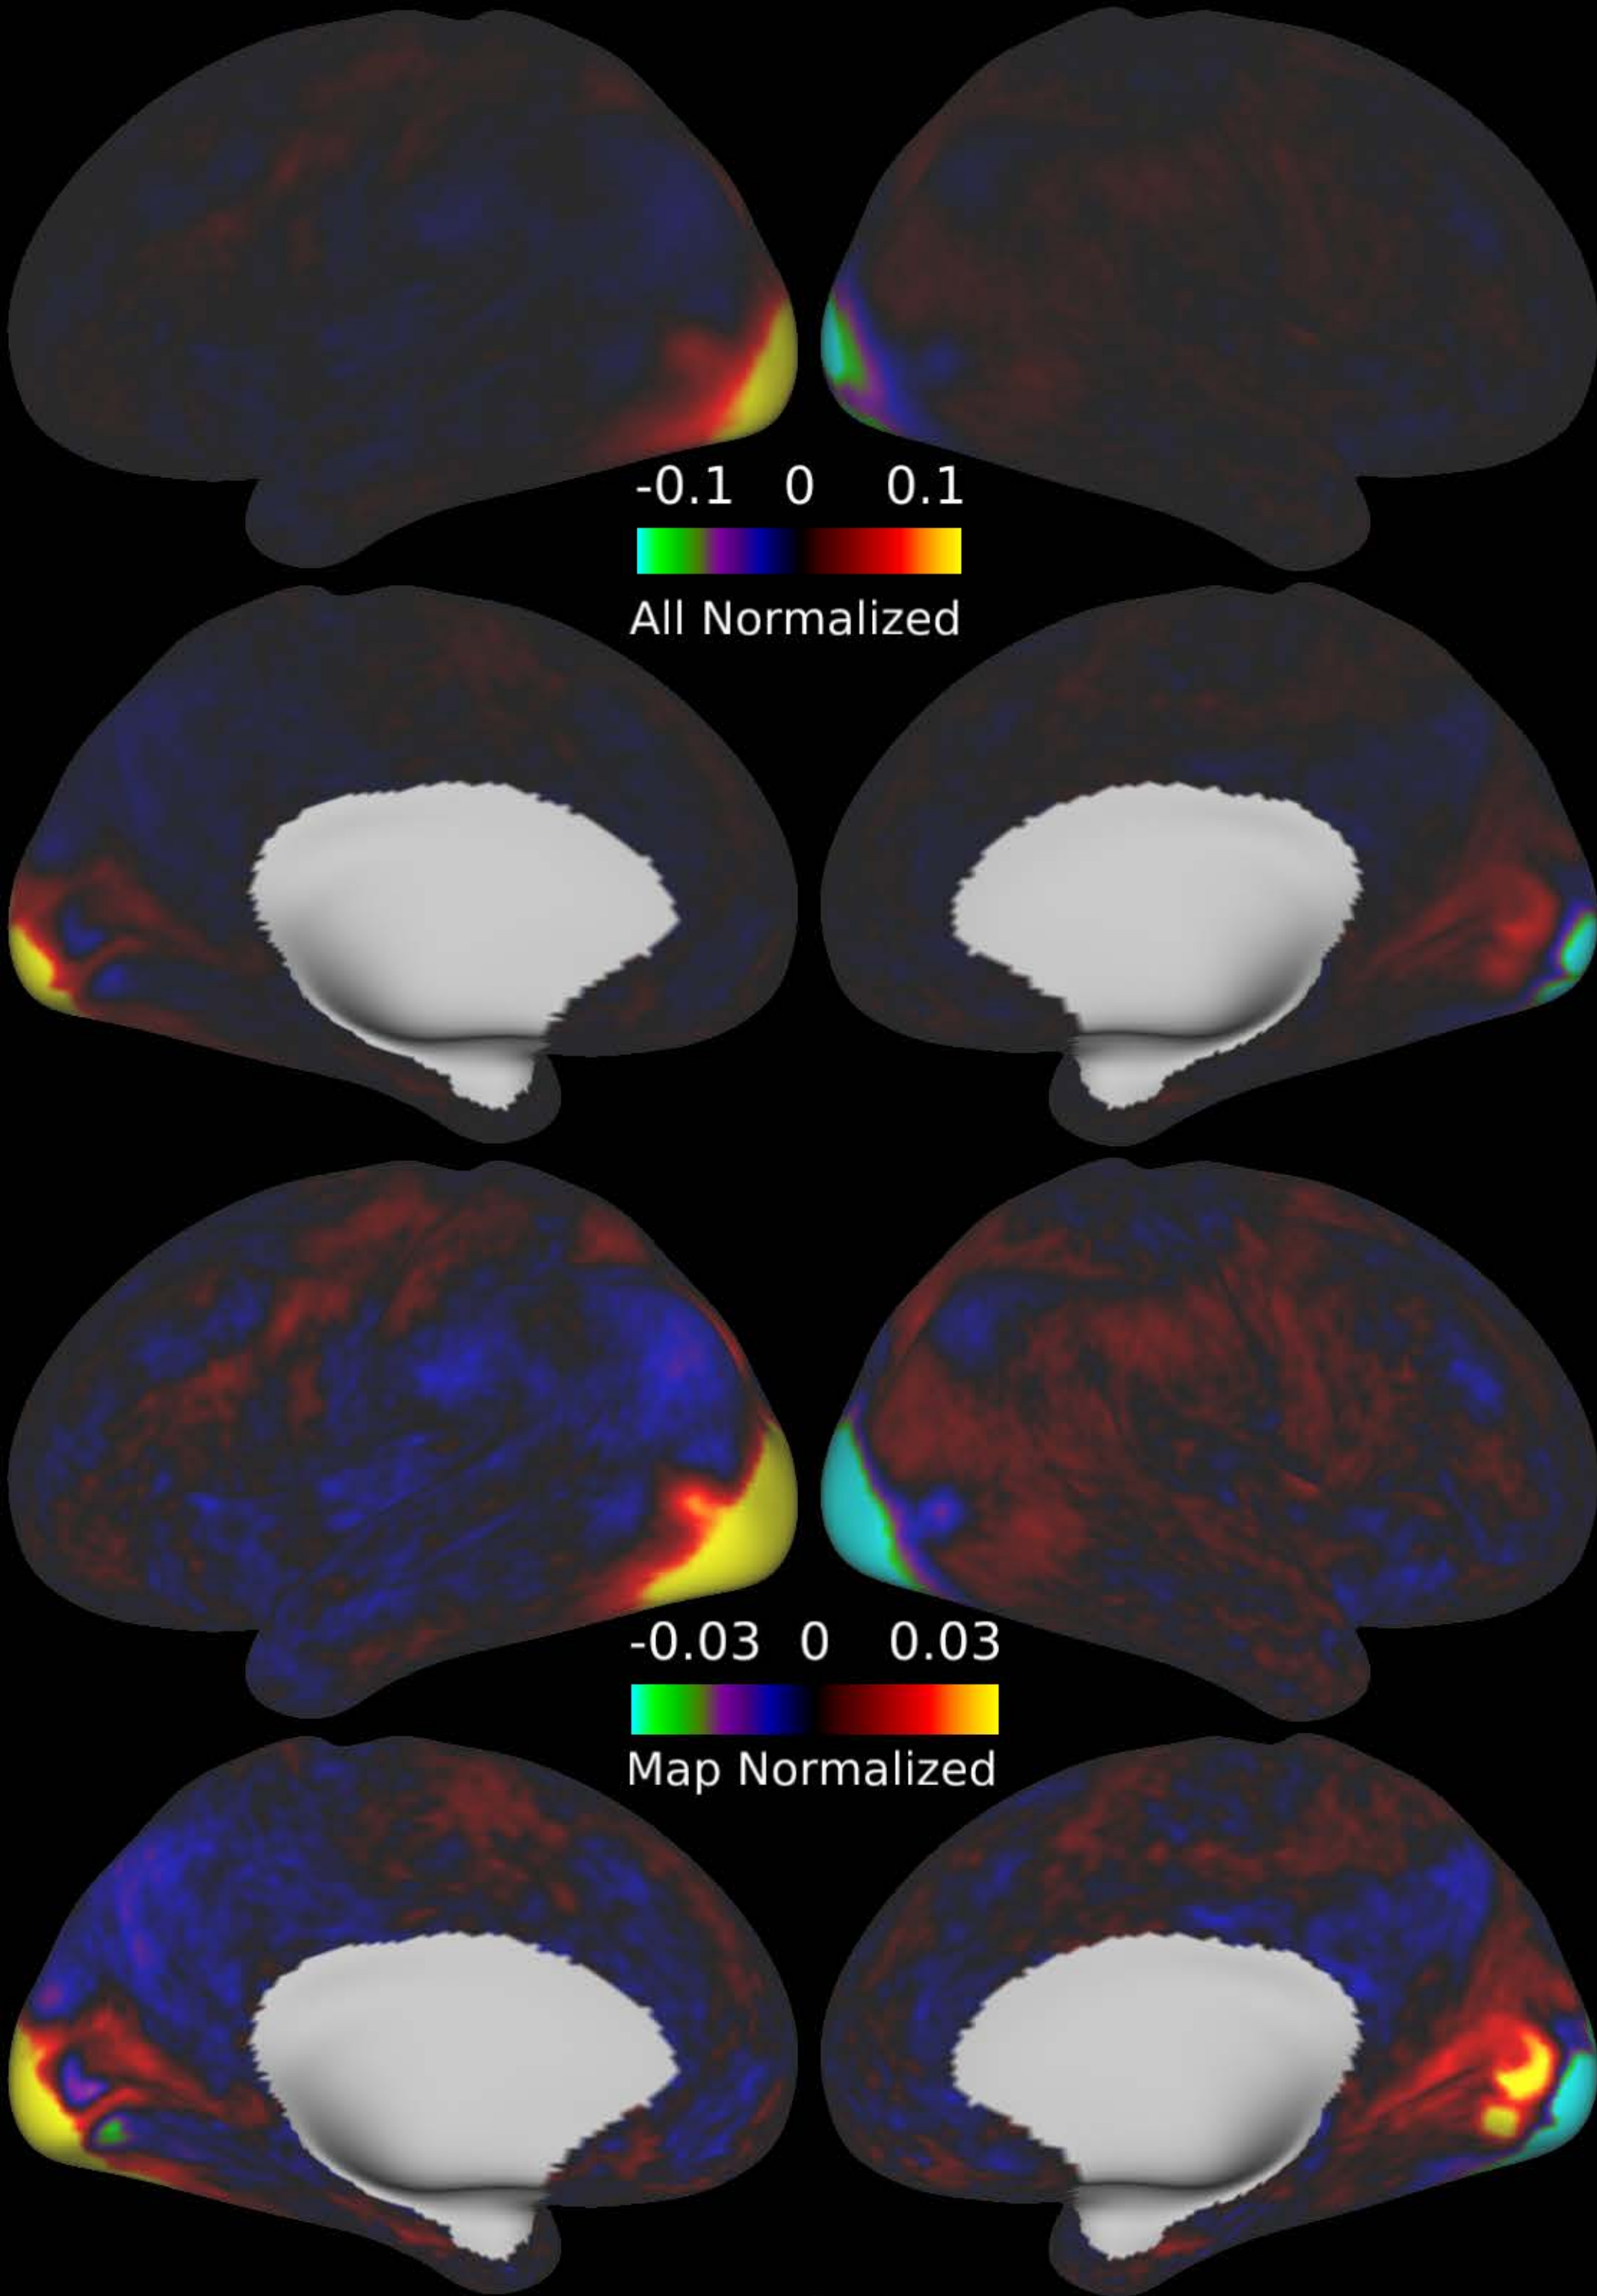

Hertz

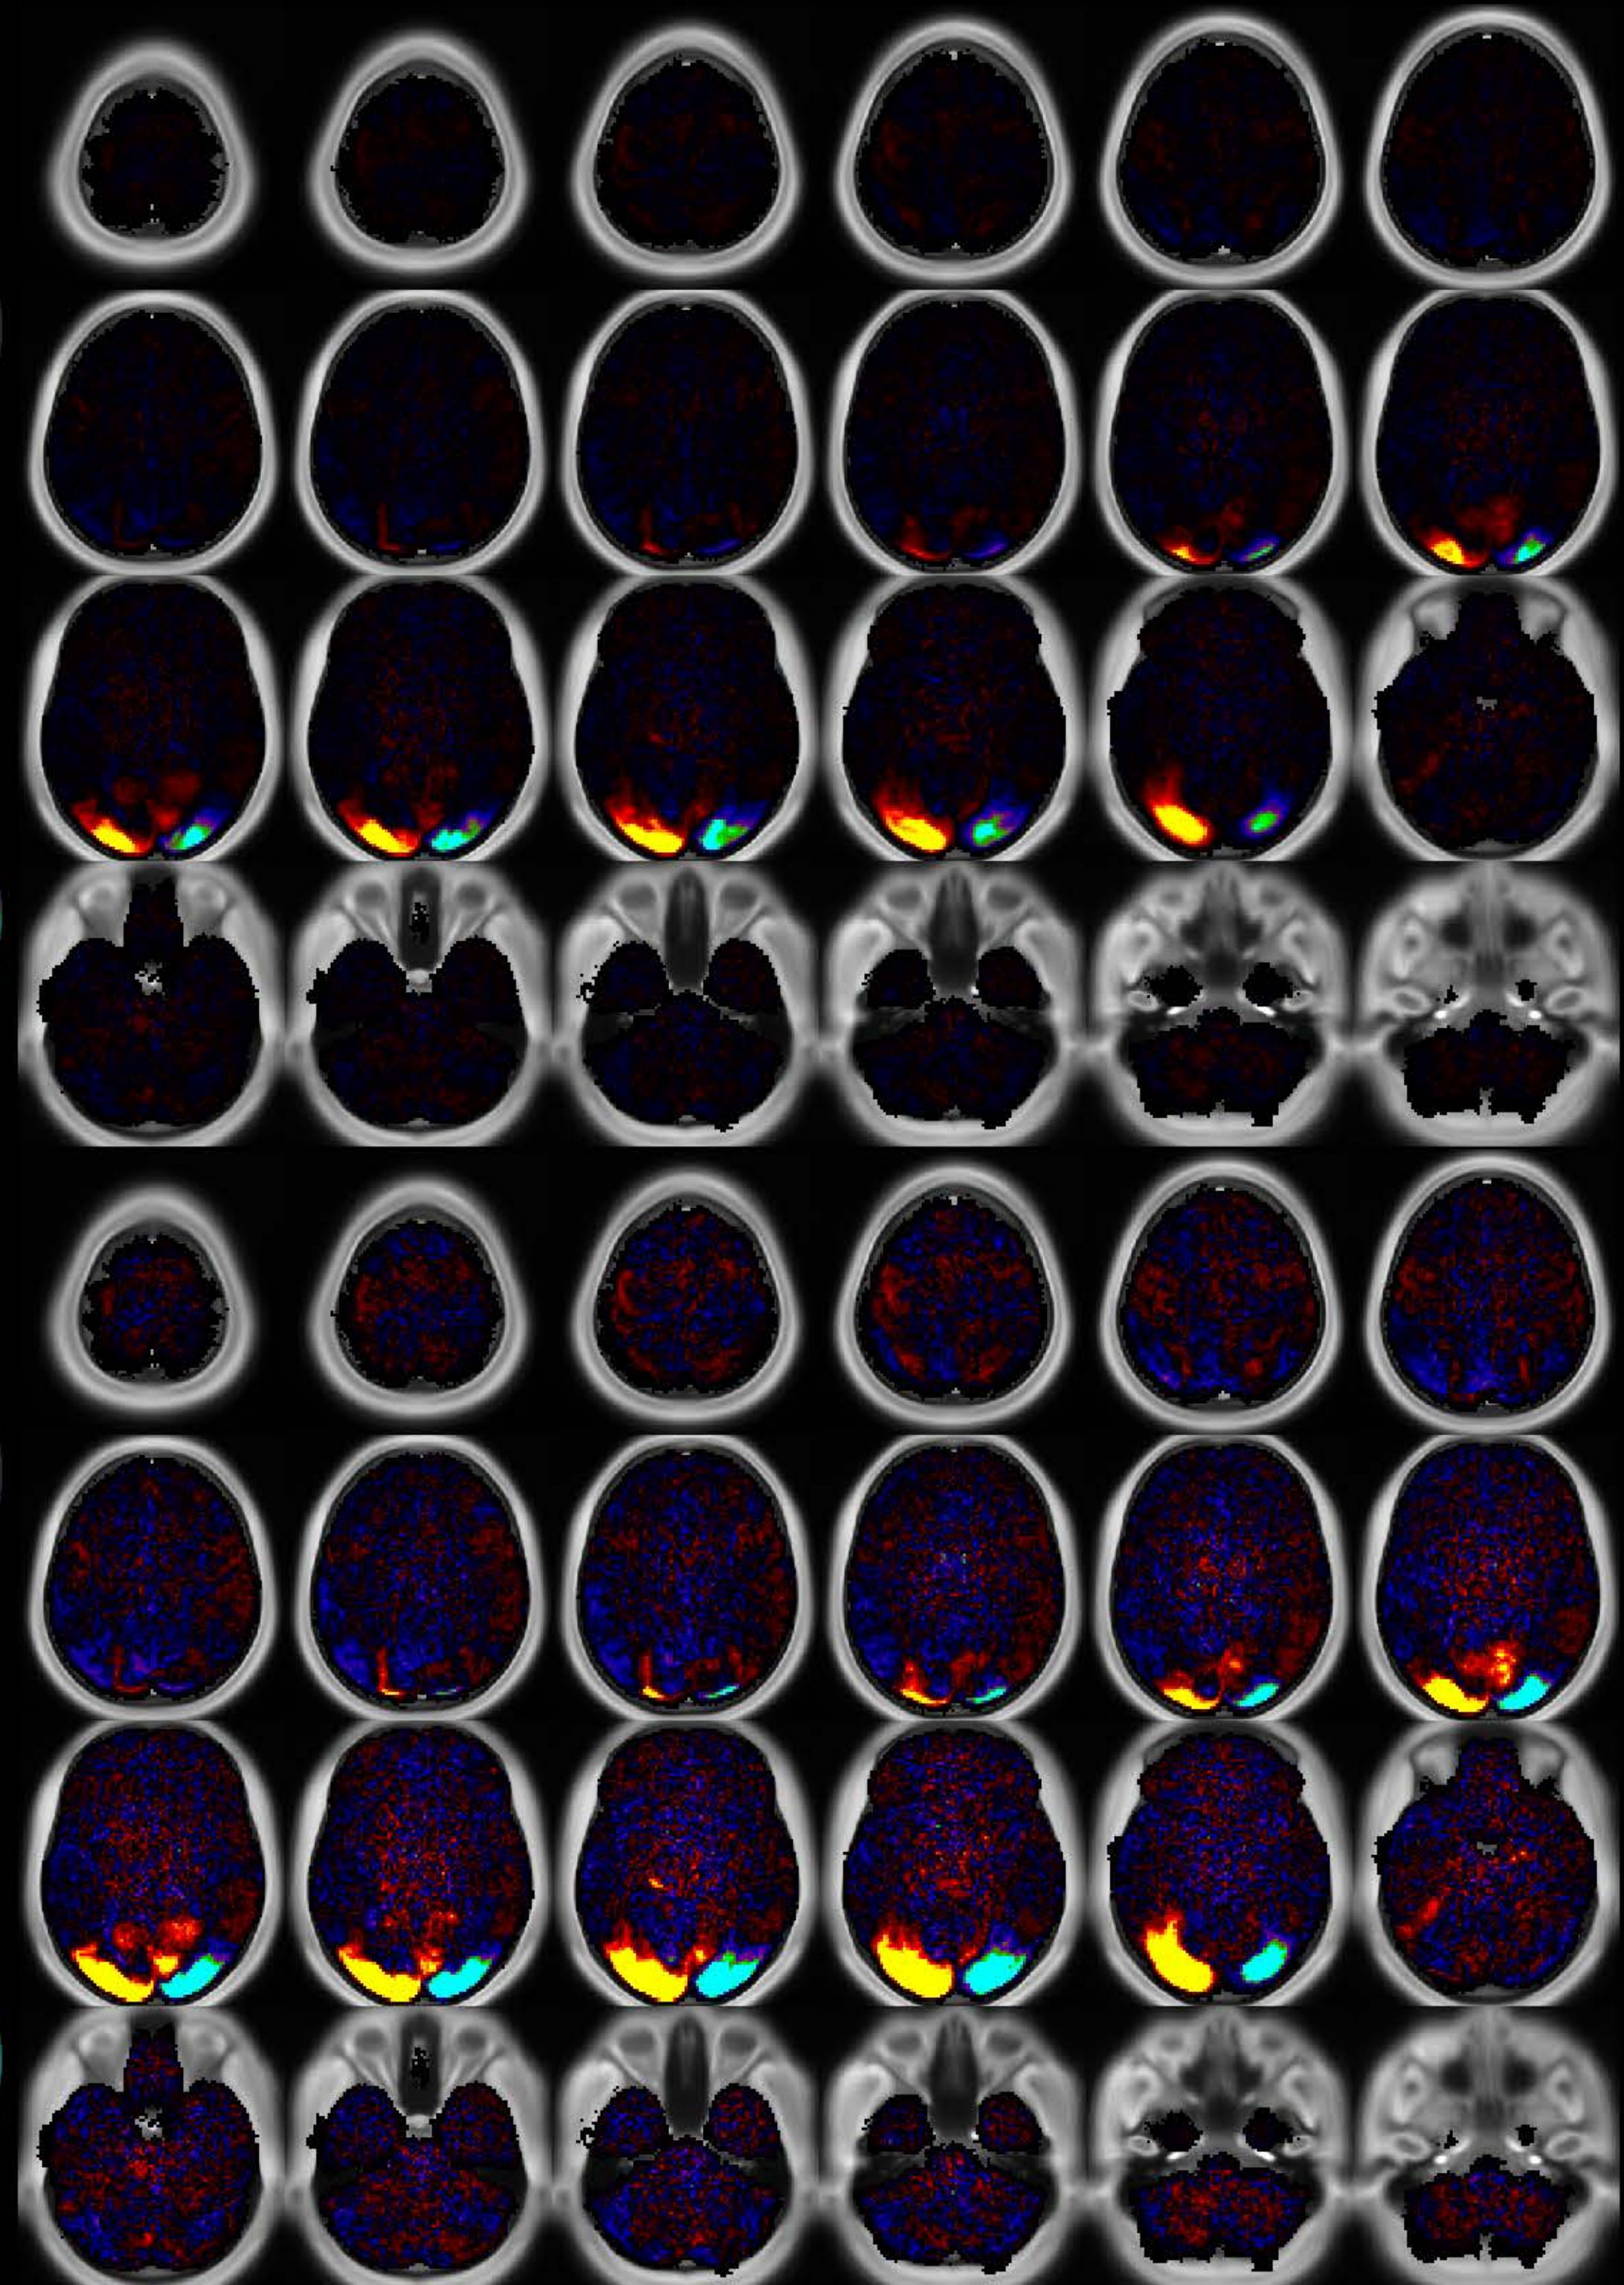

Seconds

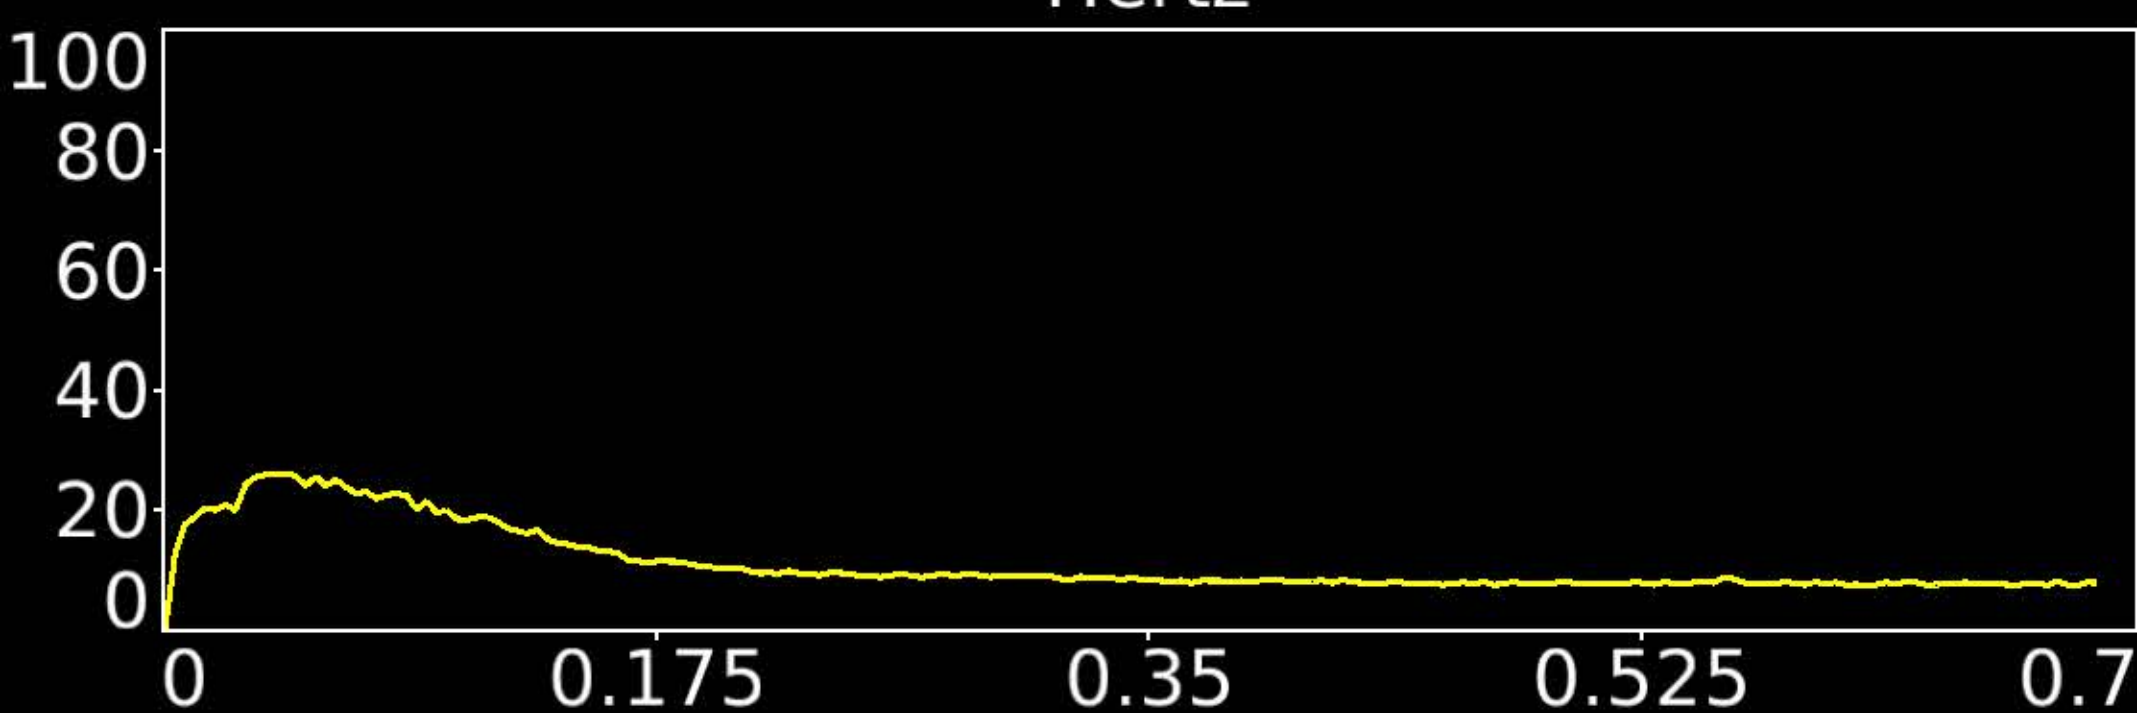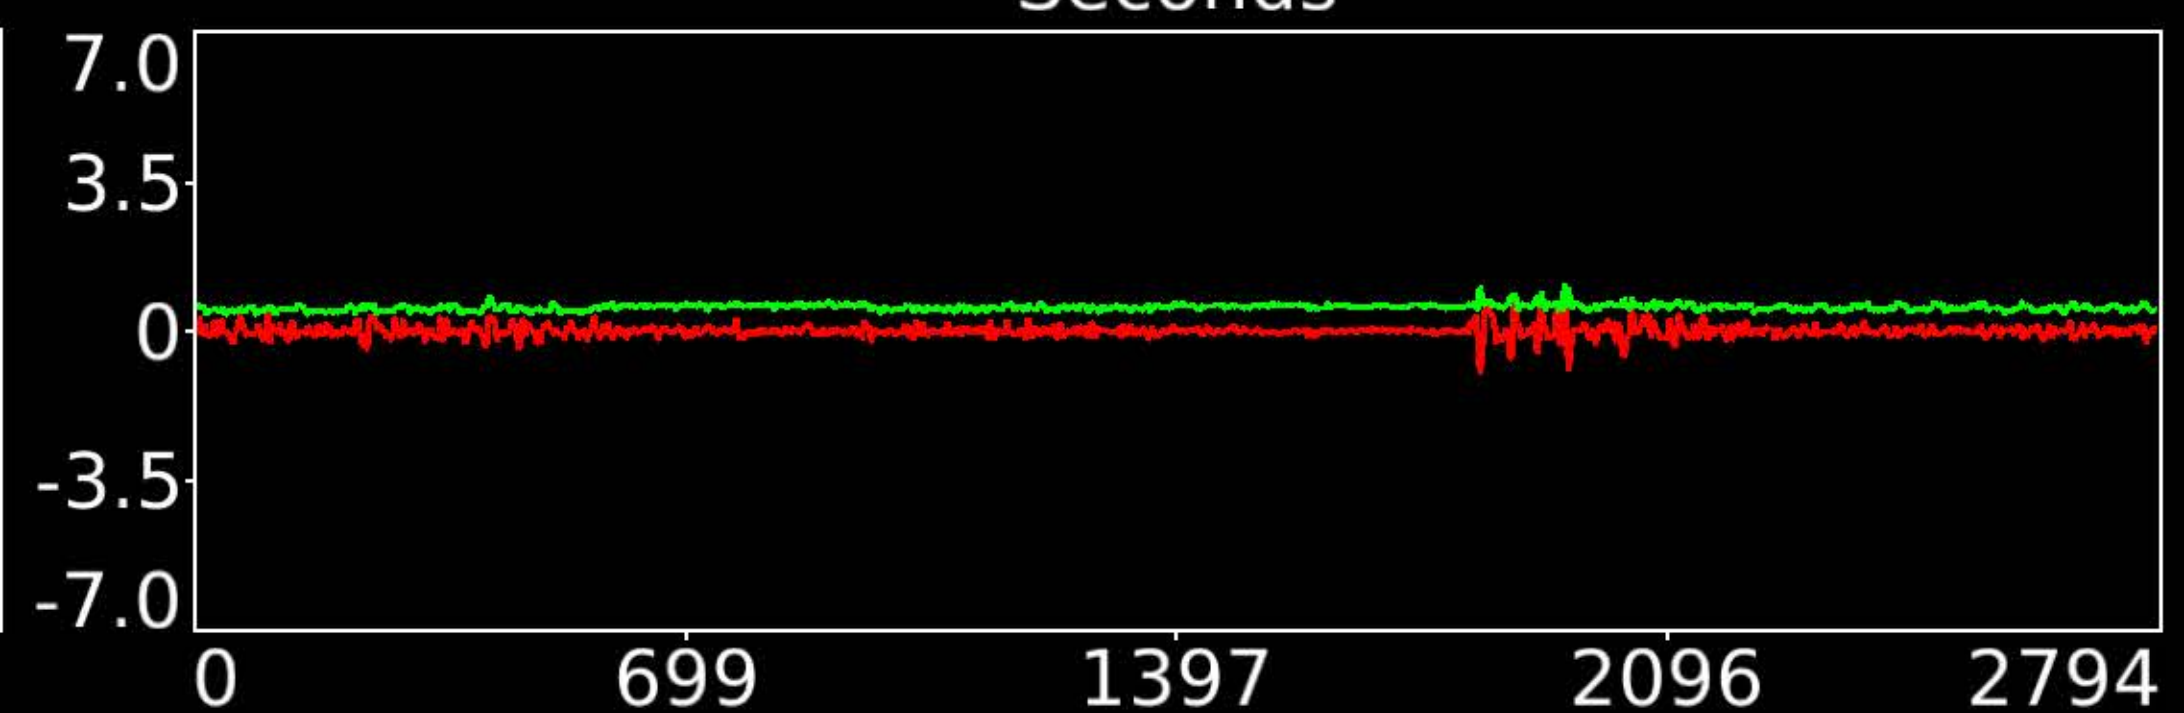

|                           |                            |                                       |  |
|---------------------------|----------------------------|---------------------------------------|--|
| Number & Class: 58 Signal |                            | Name: Visuotopic: Foveal Left > Right |  |
| RVT Correlated: No        | DVARS Dip Associated: No   | Cross-Subject Variable: No            |  |
| Single Subject: No        | % Variance Explained: 0.61 | Globality Index: 0.02                 |  |
| Task Component: 70        | Rest Component: 81         | Task Modulated: No                    |  |

Rationale: Spatial map includes positive and negative patches that respect known retinotopic visual organization (Foveal Right vs Left)
