# Supplementary material
Source: PubMed Central journal article supplement (PMC6237431)
Supplement: NIHMS1502867-supplement-4.pdf [file NIHMS1502867-supplement-4.pdf]

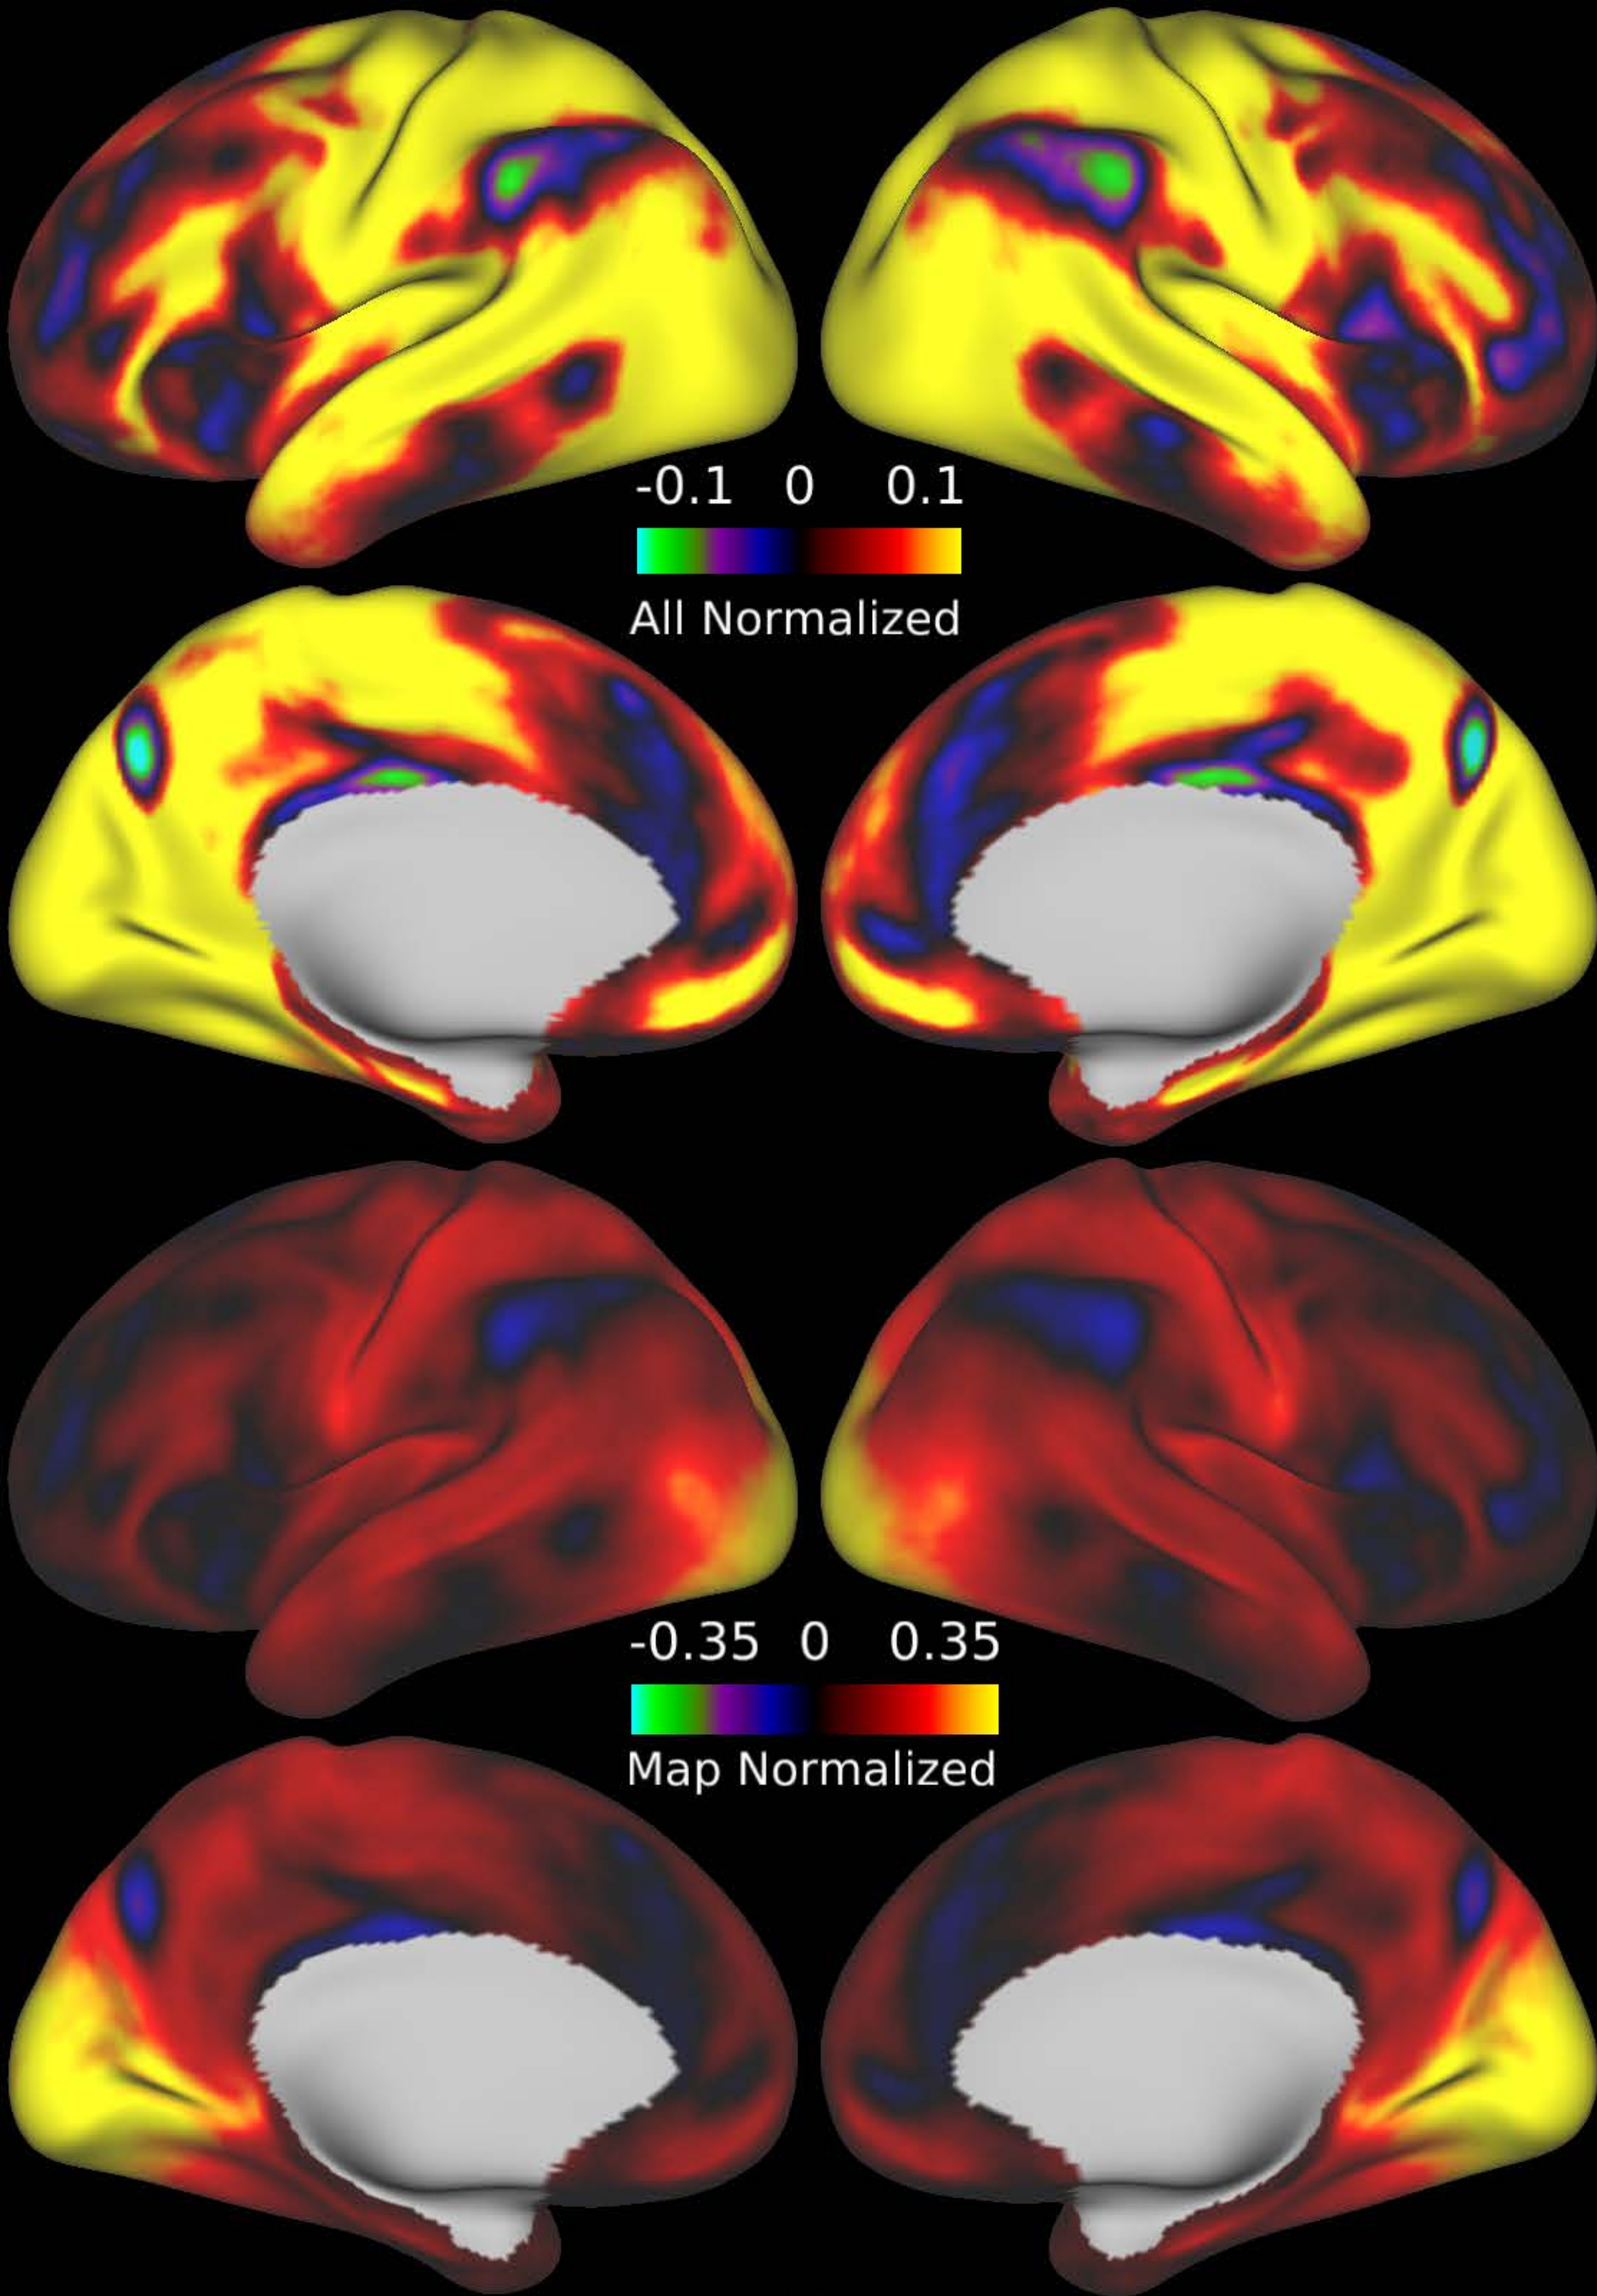

Hertz

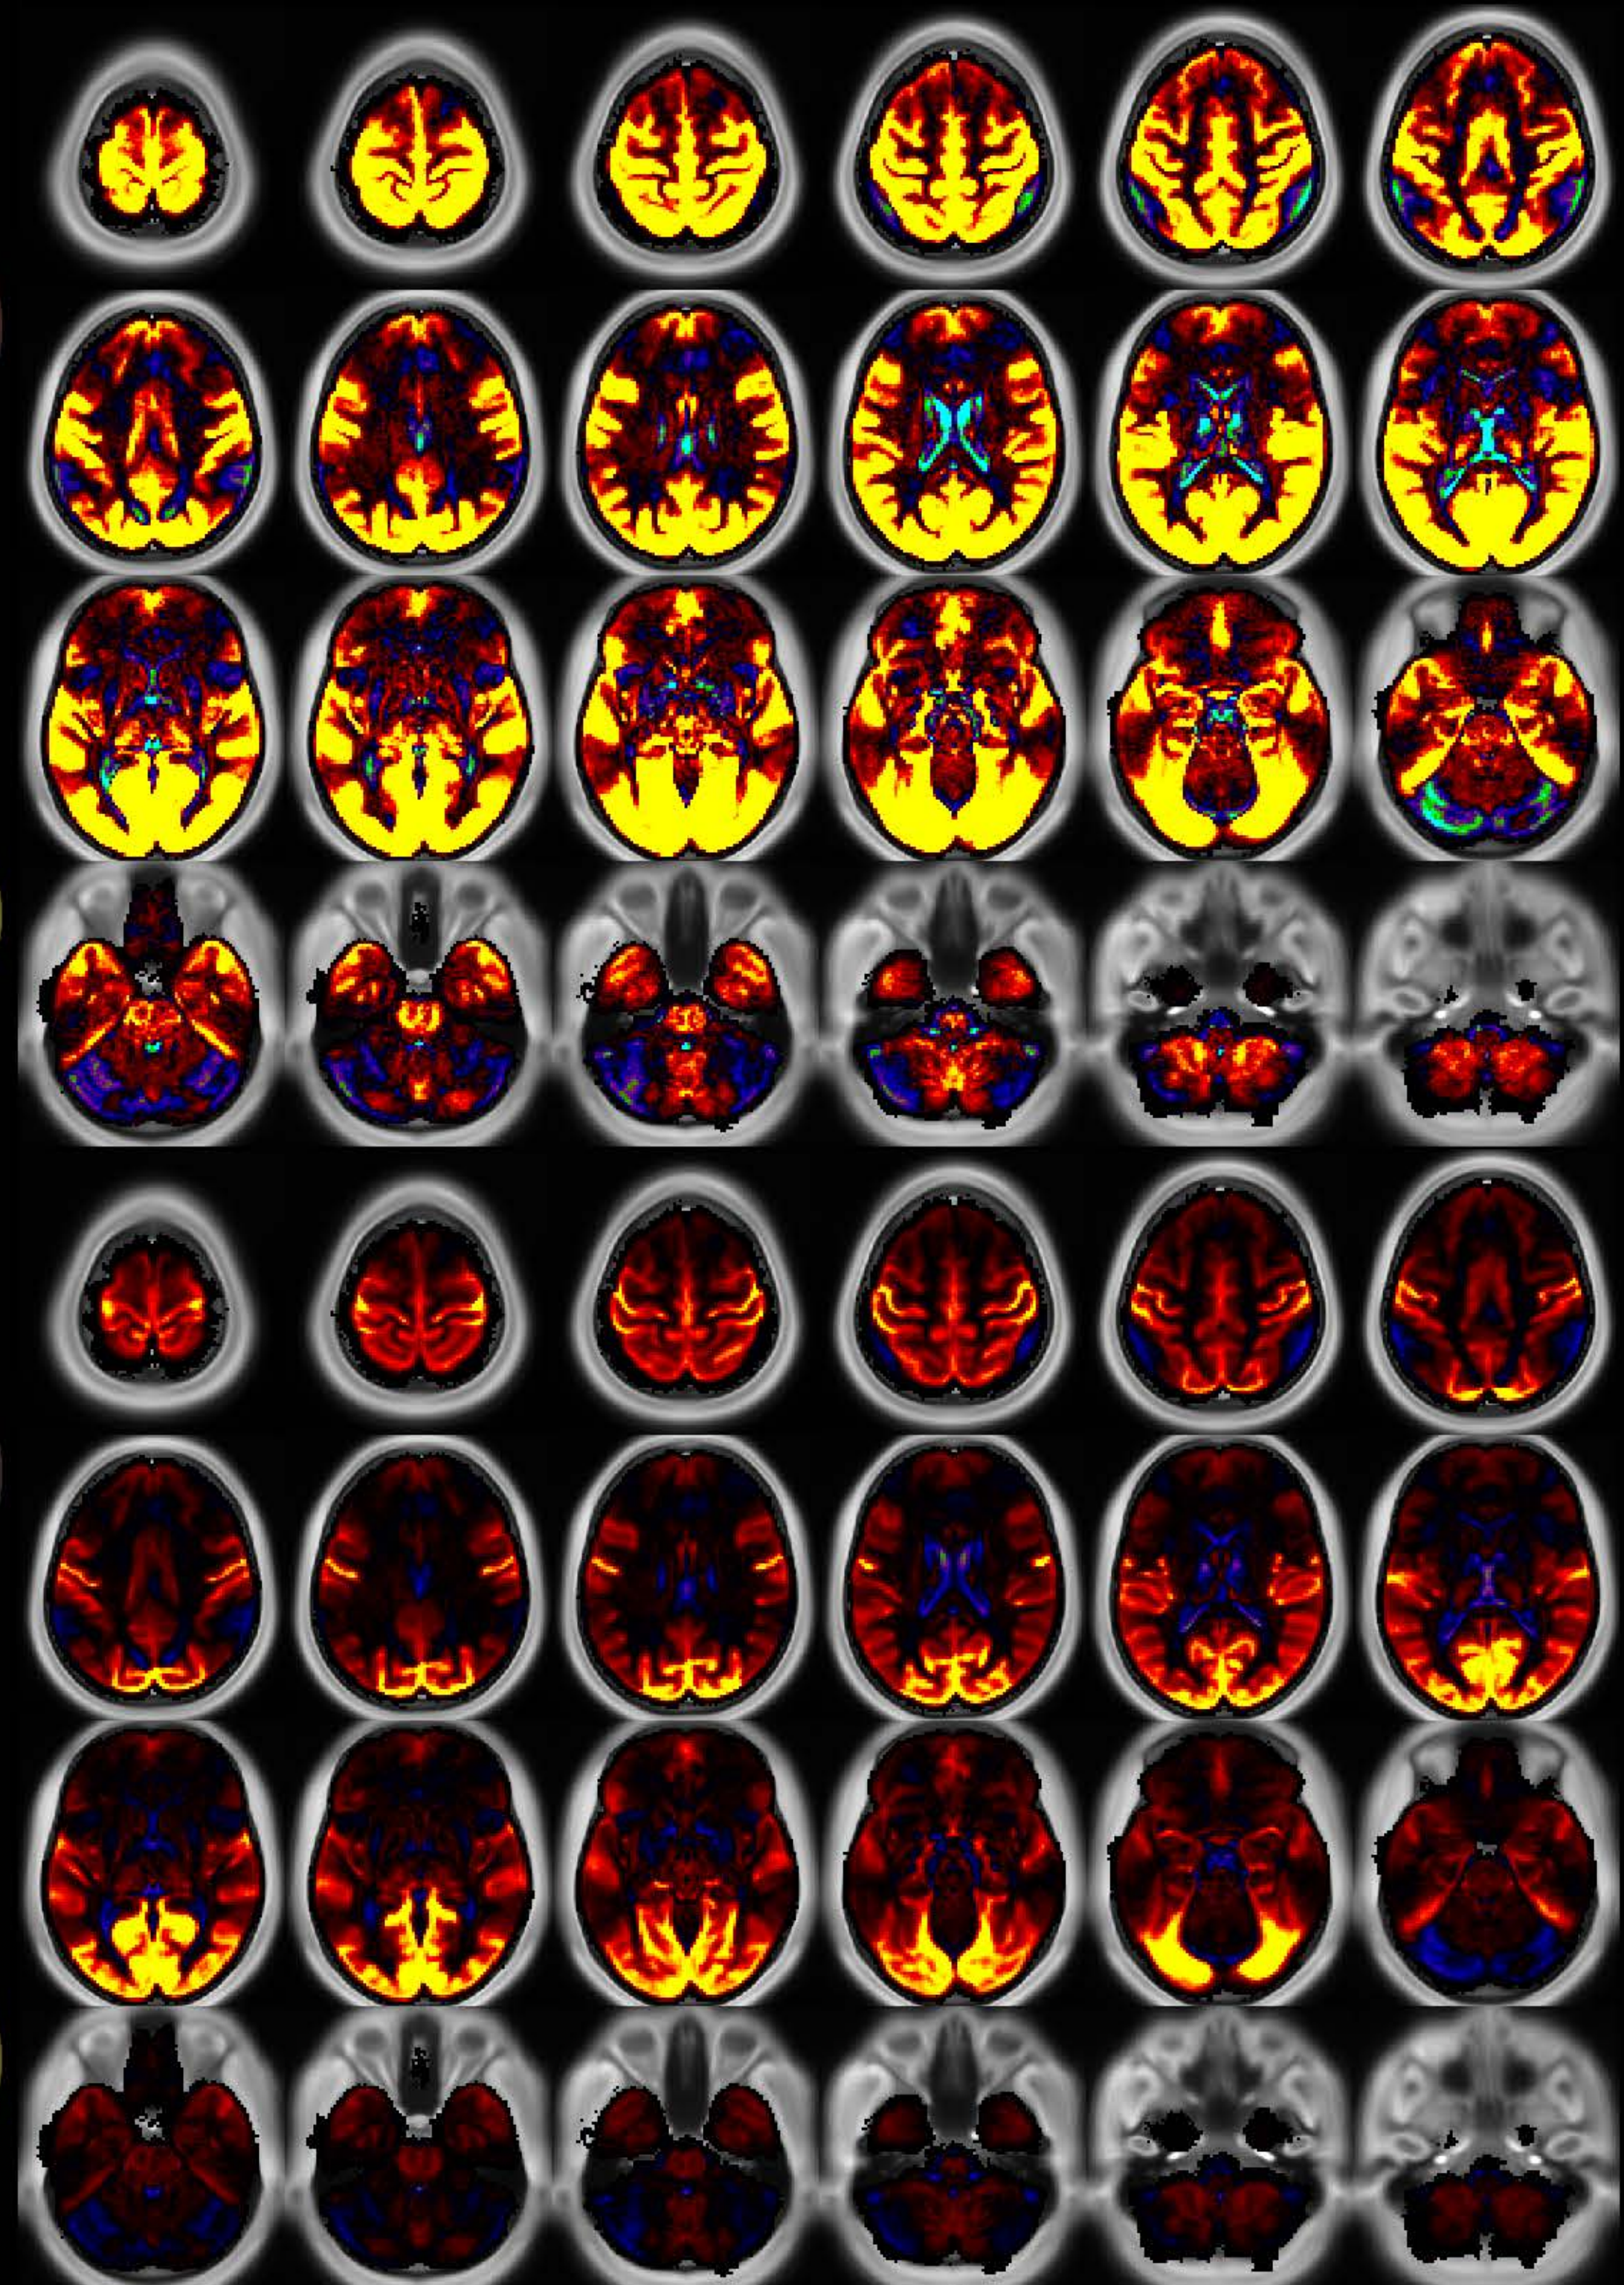

Seconds

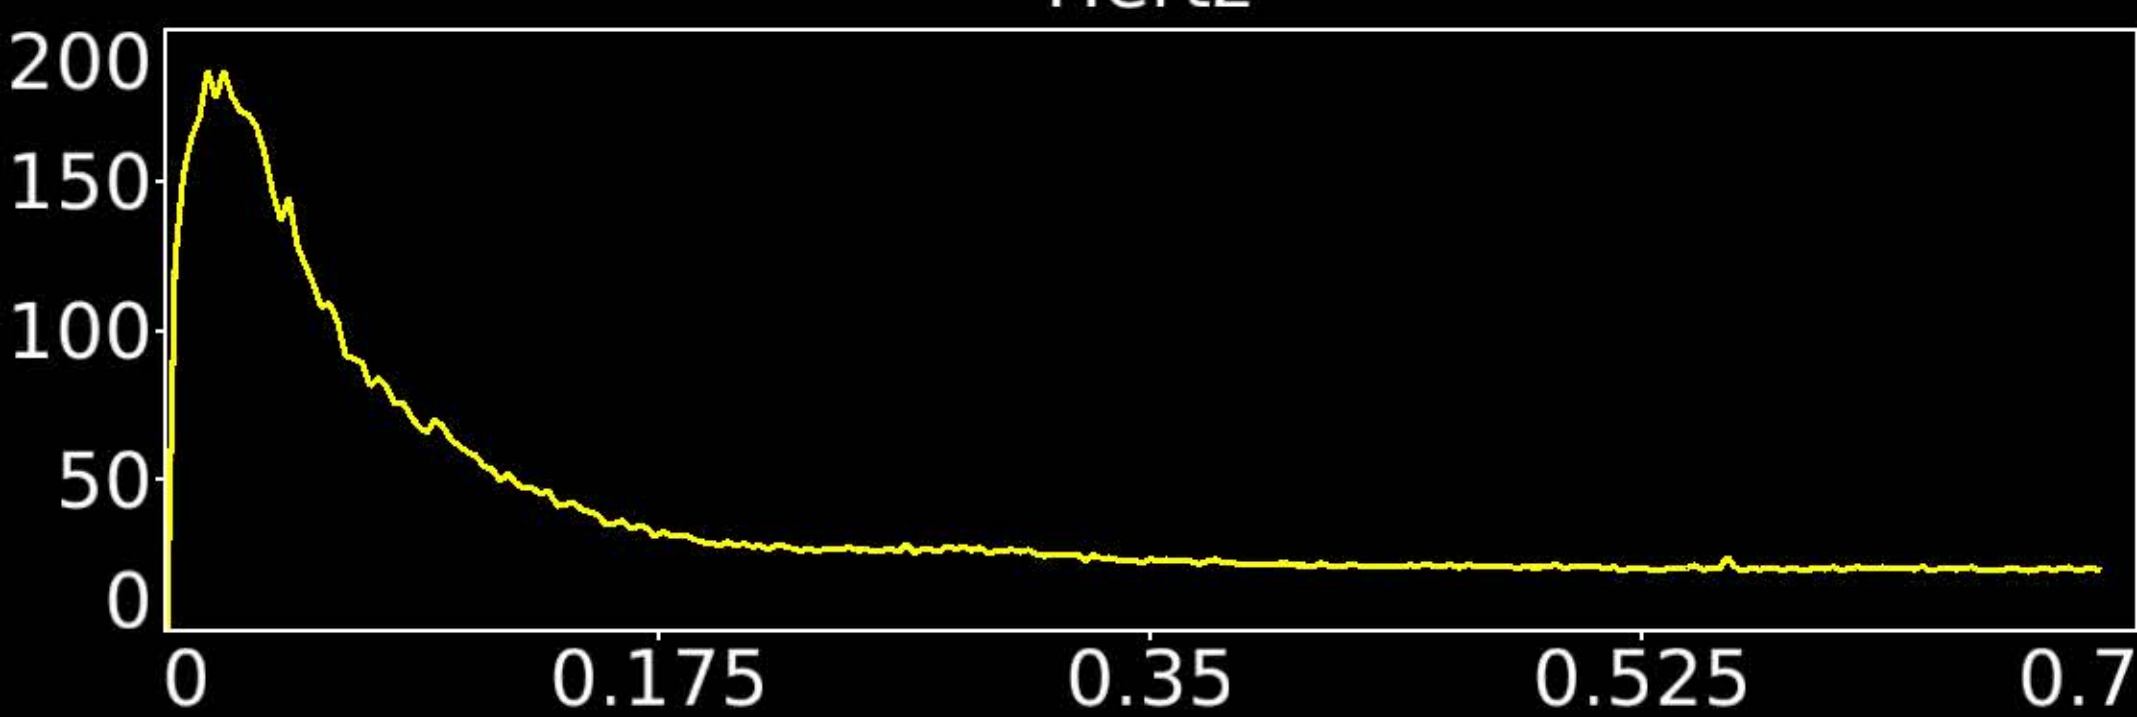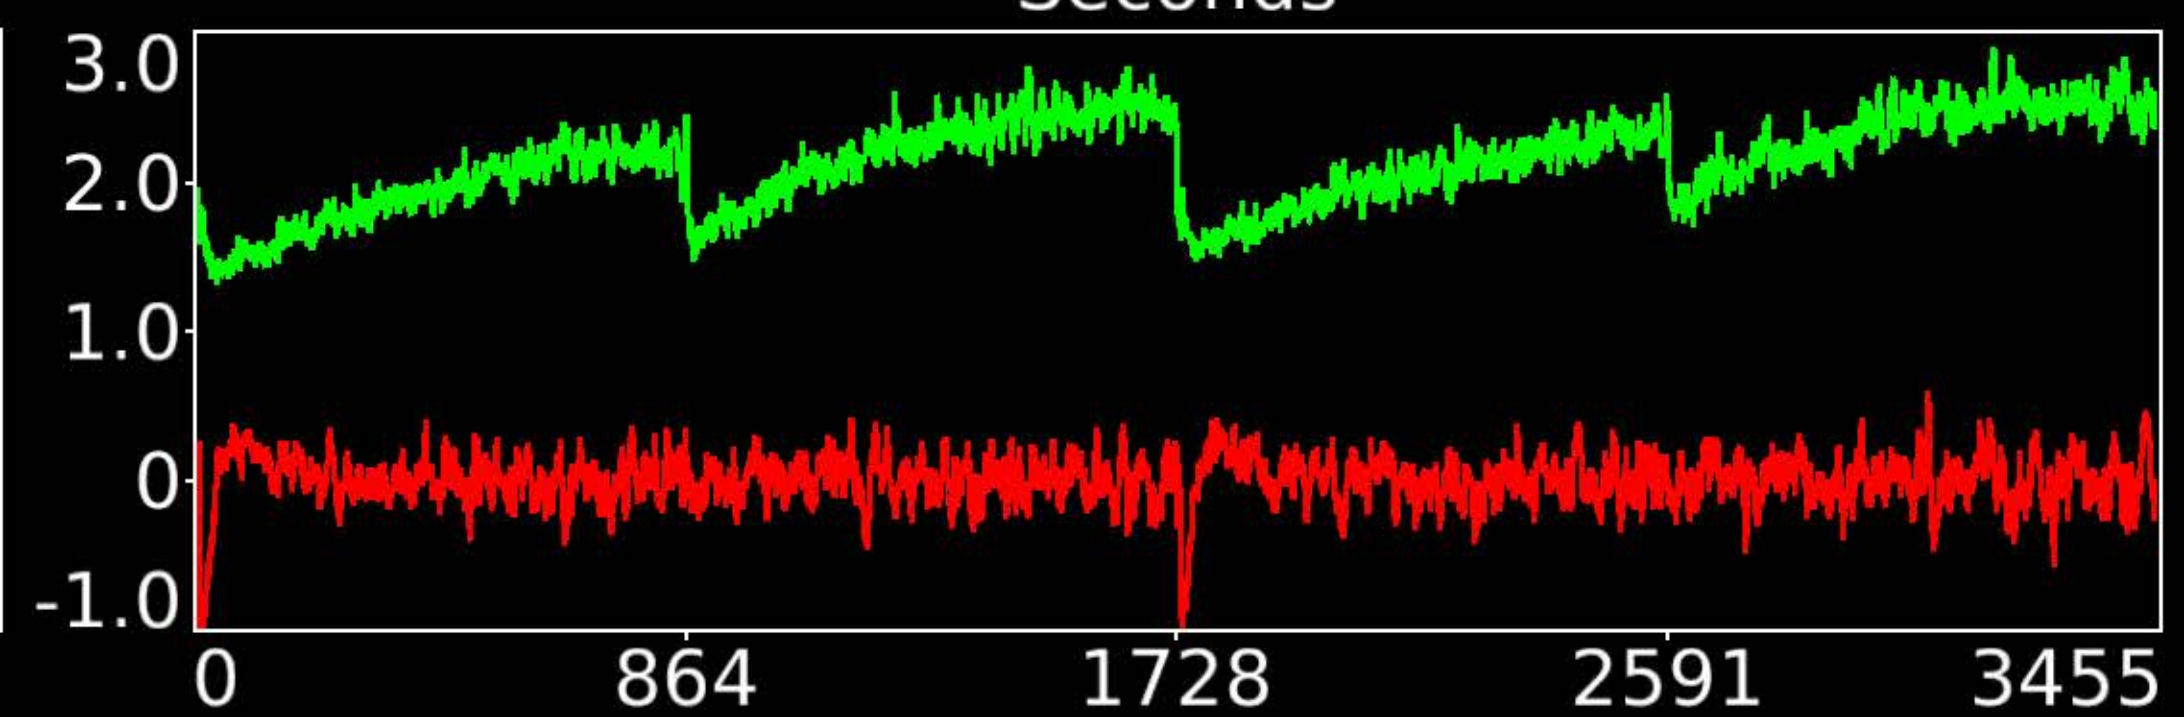

|                          |                            |                             |  |
|--------------------------|----------------------------|-----------------------------|--|
| Number & Class: 1 Signal |                            | Name: Main Sleep Component  |  |
| RVT Correlated: No       | DVARS Dip Associated: No   | Cross-Subject Variable: Yes |  |
| Single Subject: No       | % Variance Explained: 8.47 | Globality Index: 2.35       |  |
| Task Component: No       | Taskr Component: No        | Sleep Noted: Yes            |  |

Rationale: Spatial map includes positive and negative patches that respect known areal boundaries (e.g. POS2 and RSC)



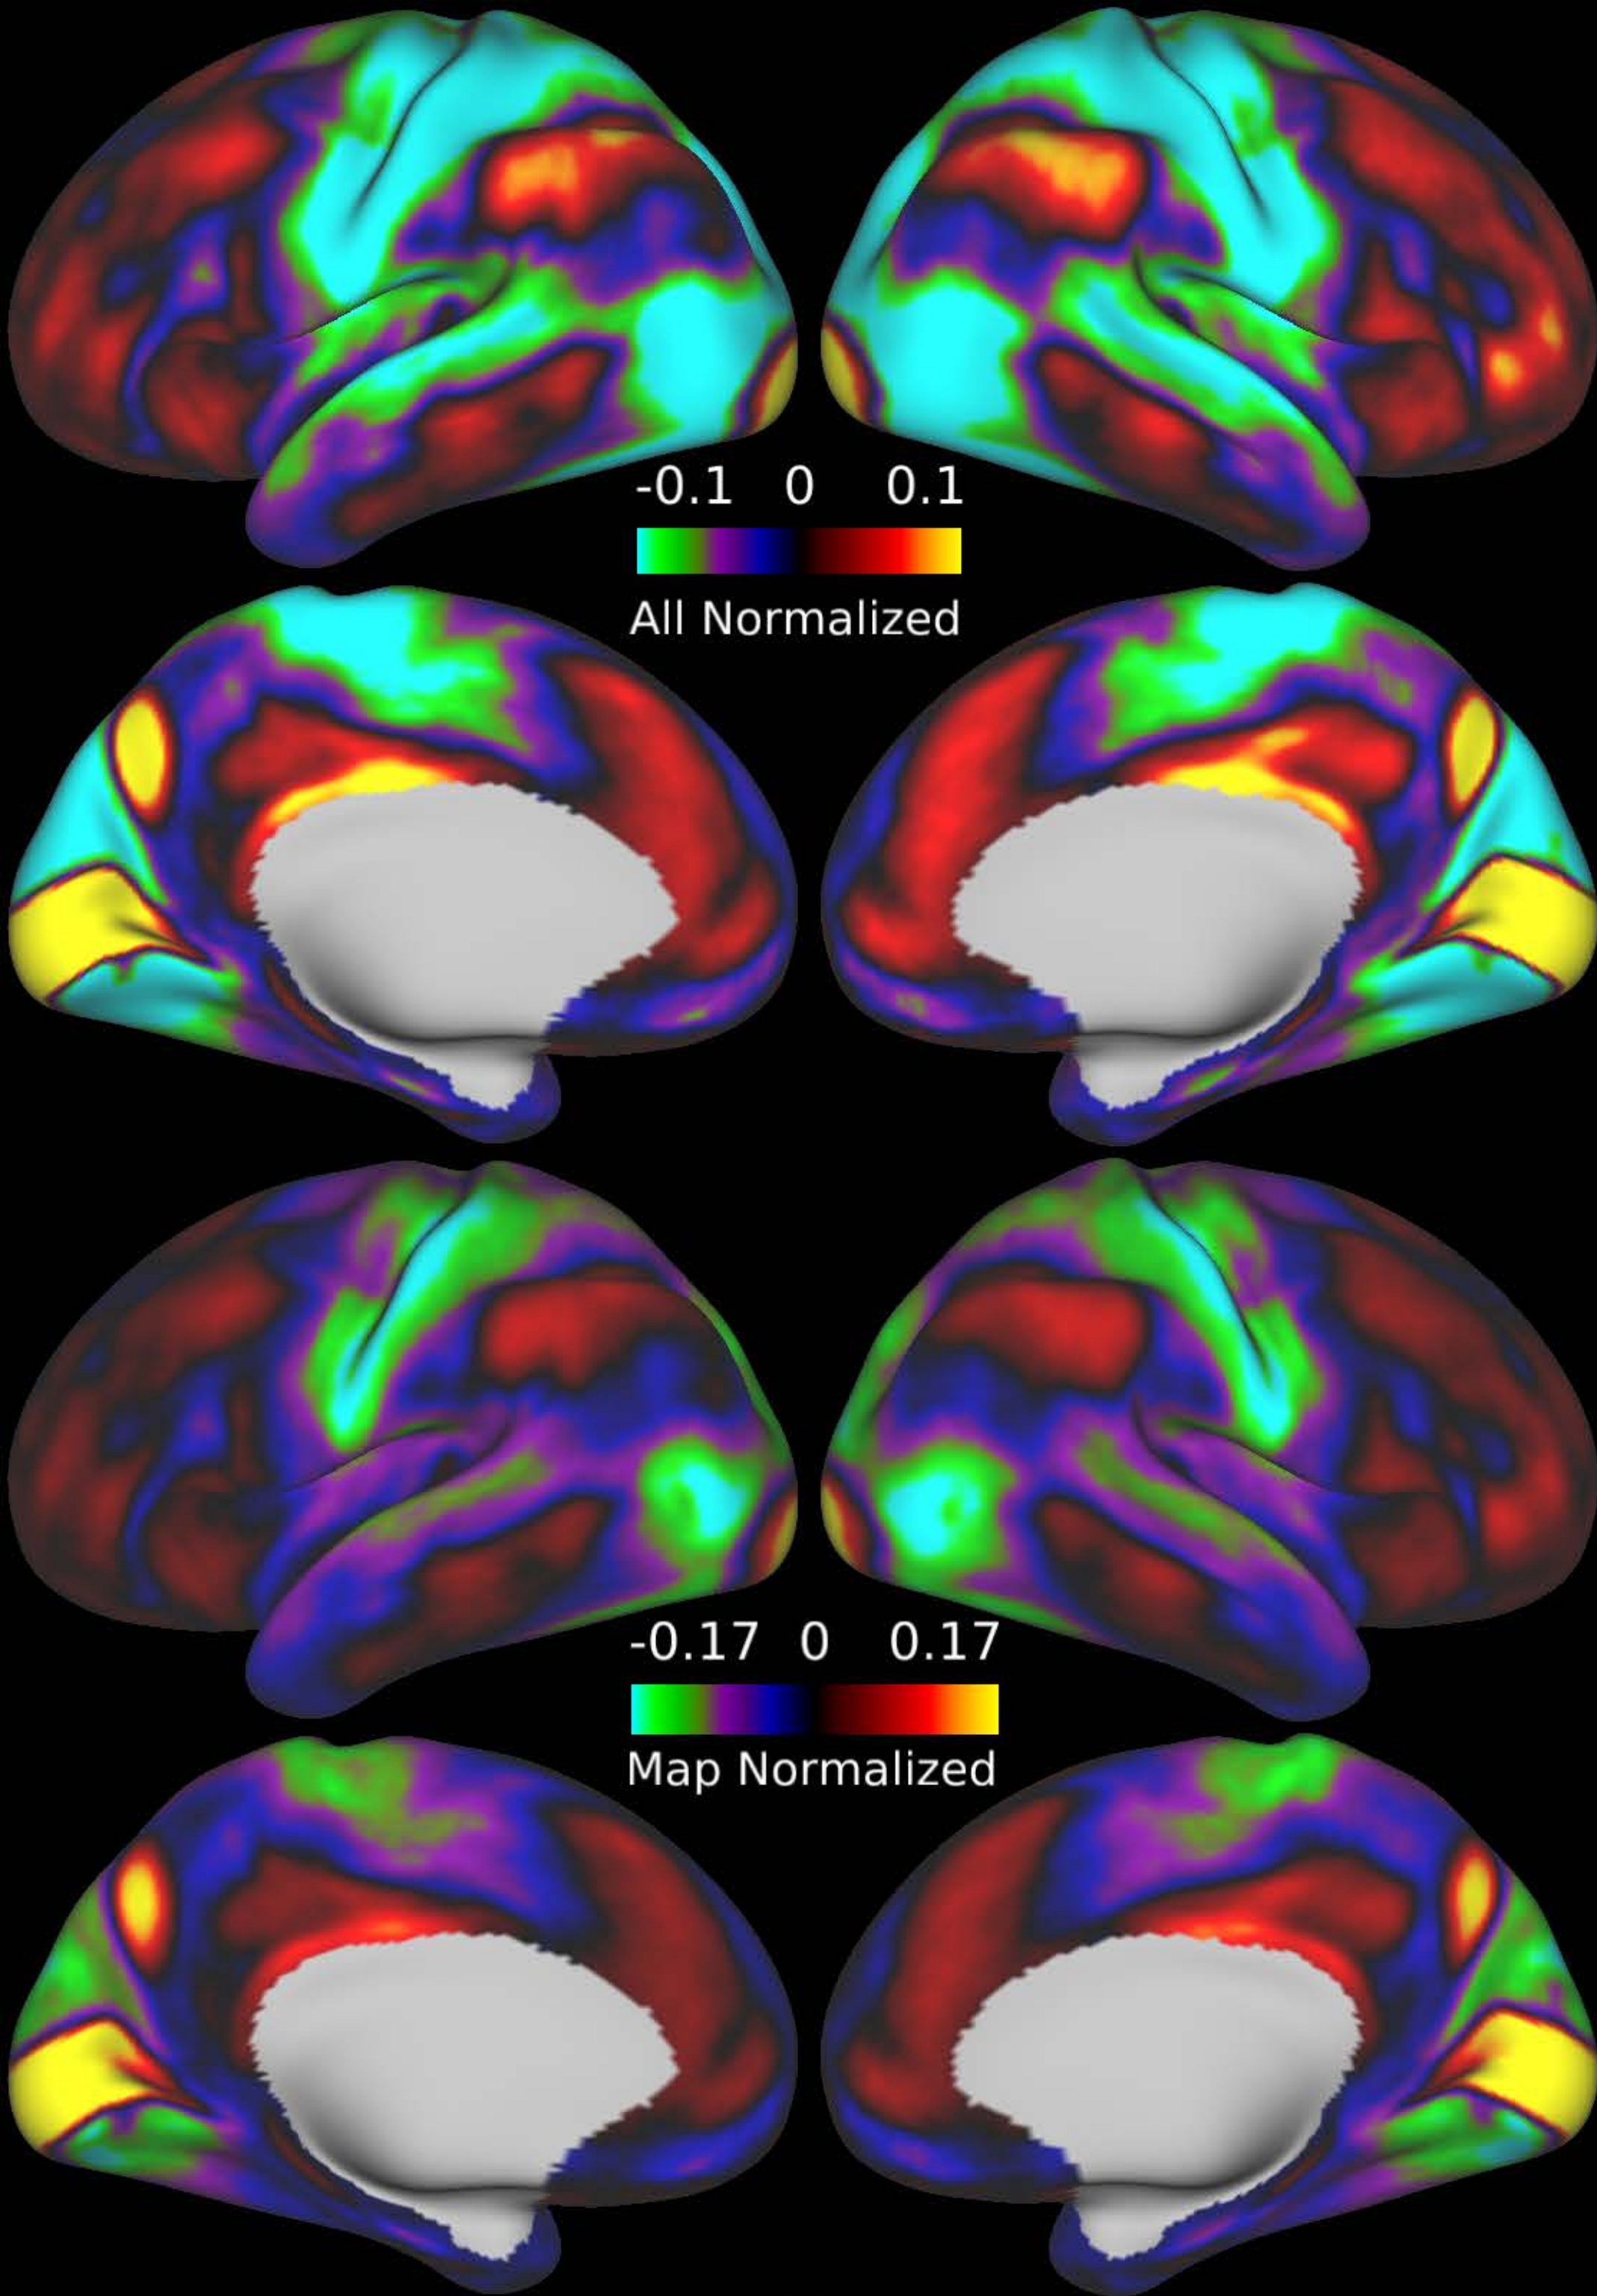

Hertz

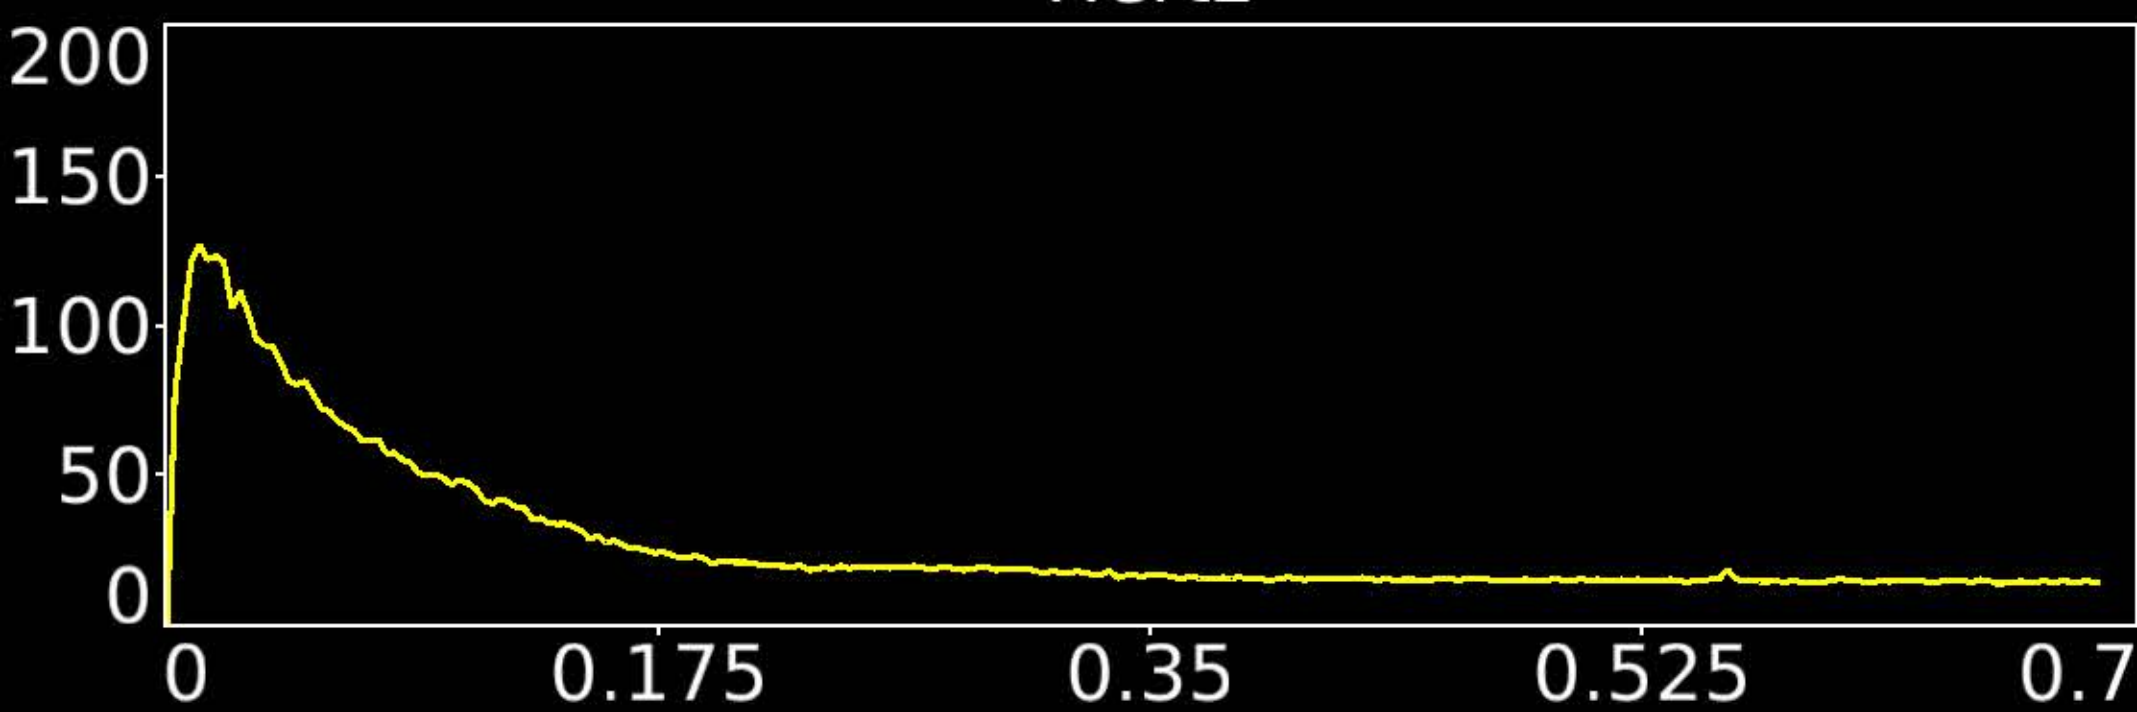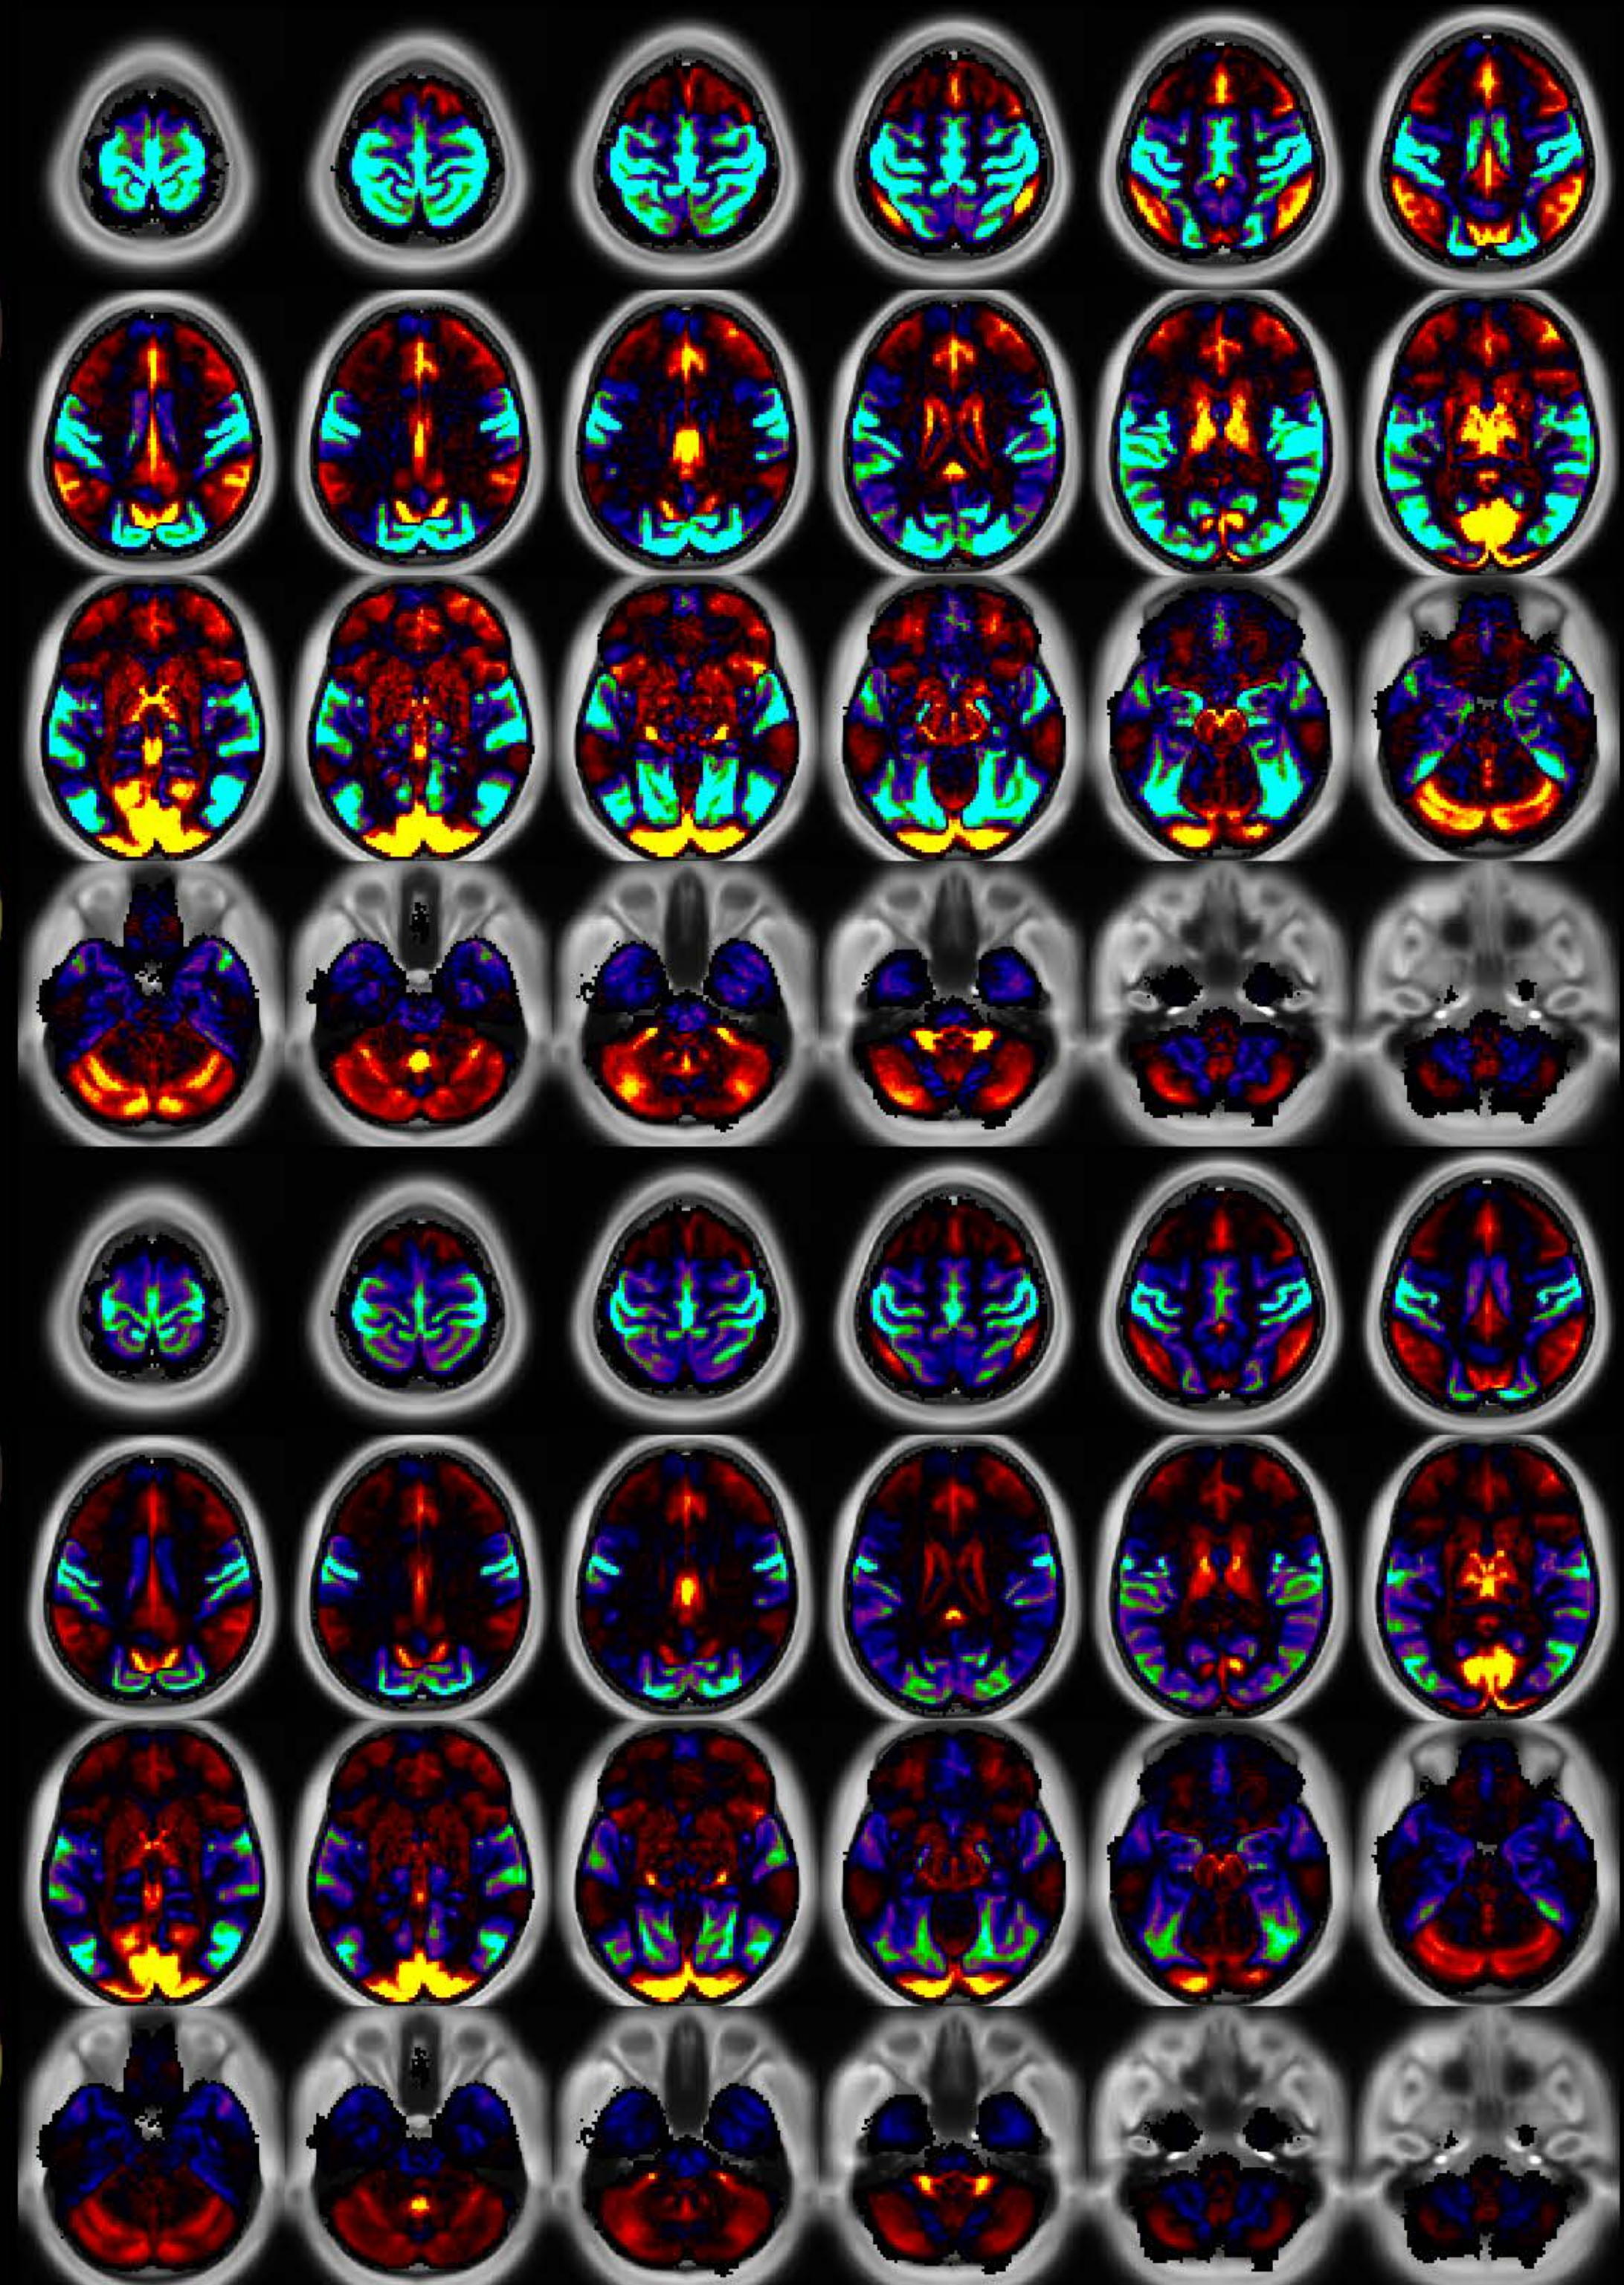

Seconds

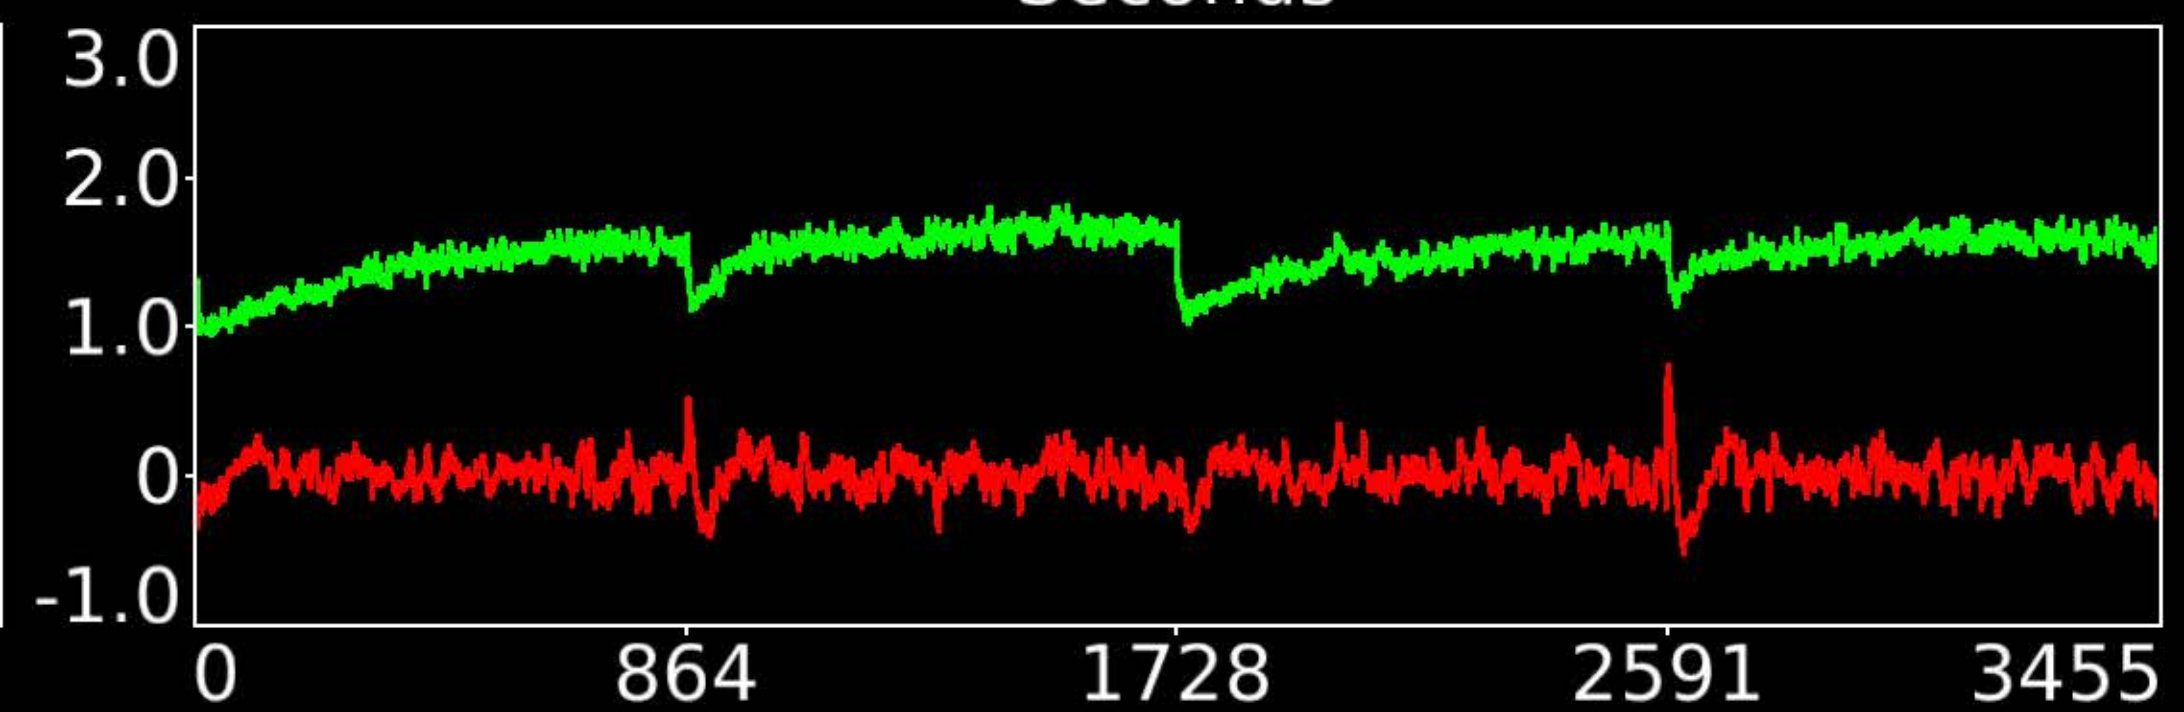

|                          |                            |                                    |  |
|--------------------------|----------------------------|------------------------------------|--|
| Number & Class: 2 Signal |                            | Name: LGN to V1 Variable Component |  |
| RVT Correlated: No       | DVARS Dip Associated: No   | Cross-Subject Variable: Yes        |  |
| Single Subject: No       | % Variance Explained: 3.64 | Globality Index: 0.24              |  |
| Task Component: 14       | Taskr Component: 14        | Sleep Noted: No                    |  |

Rationale: Spatial map includes positive and negative patches that respect known areal boundaries (e.g. V1 and V2)



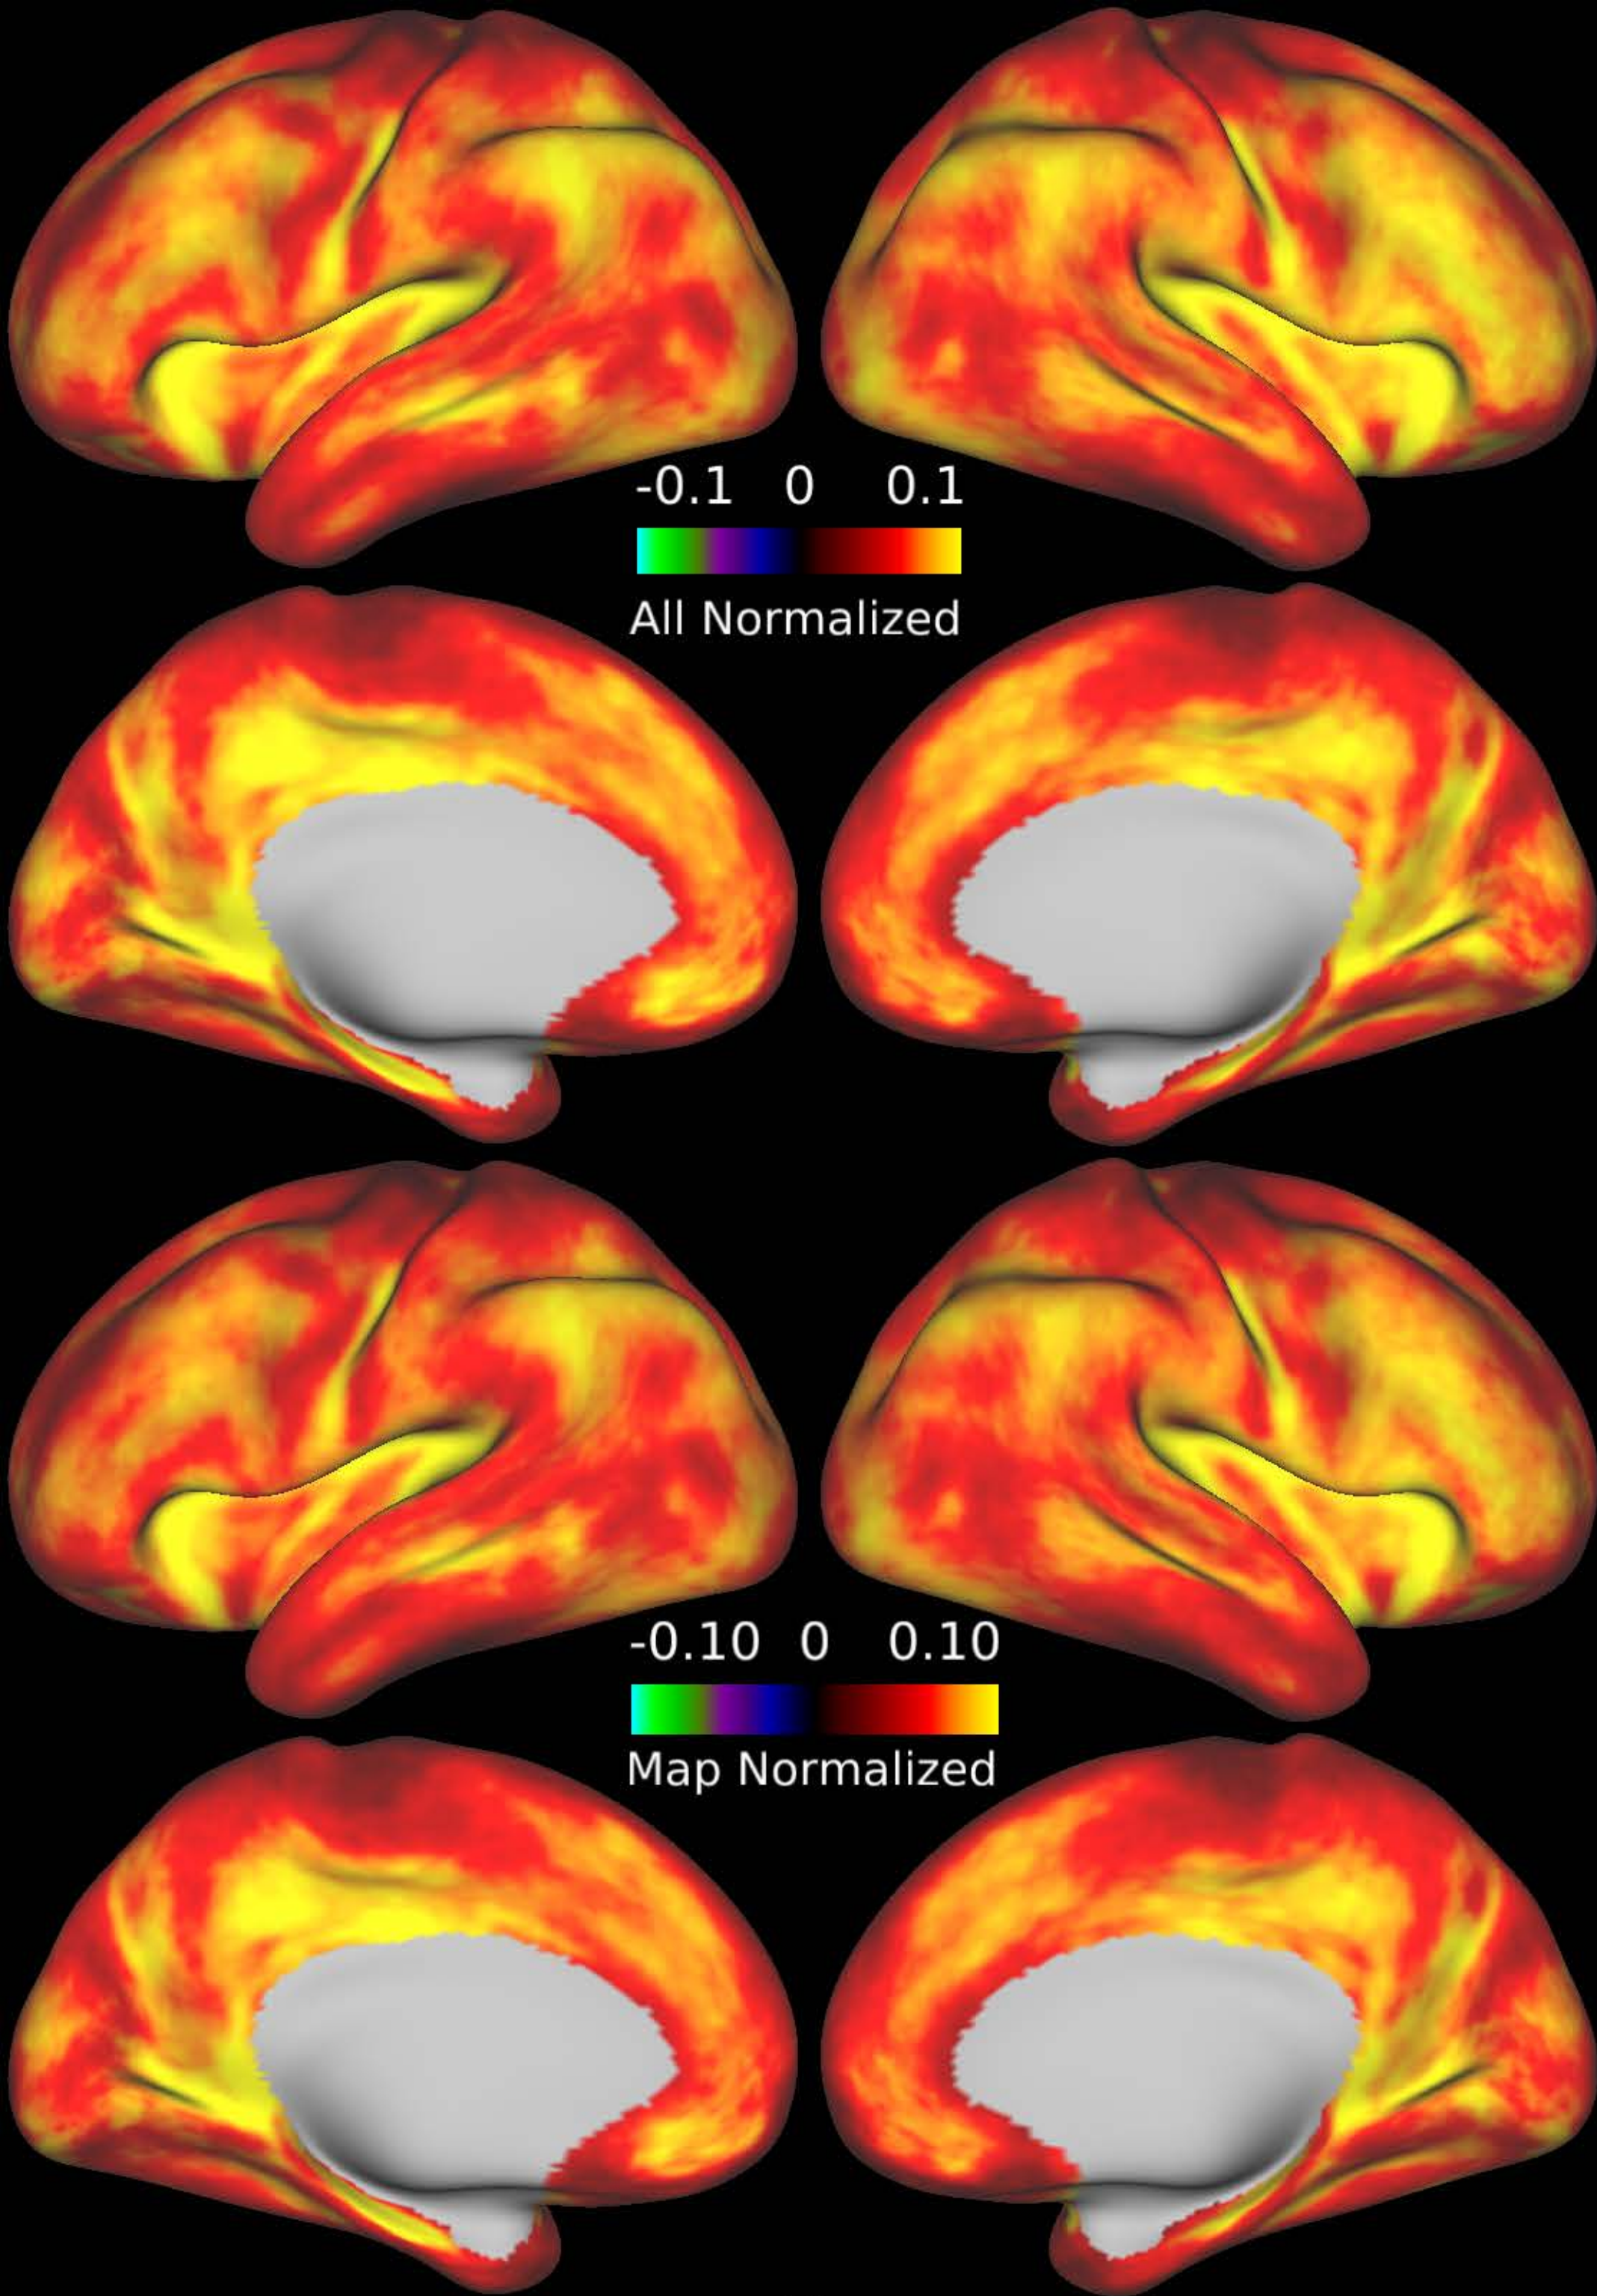

Hertz

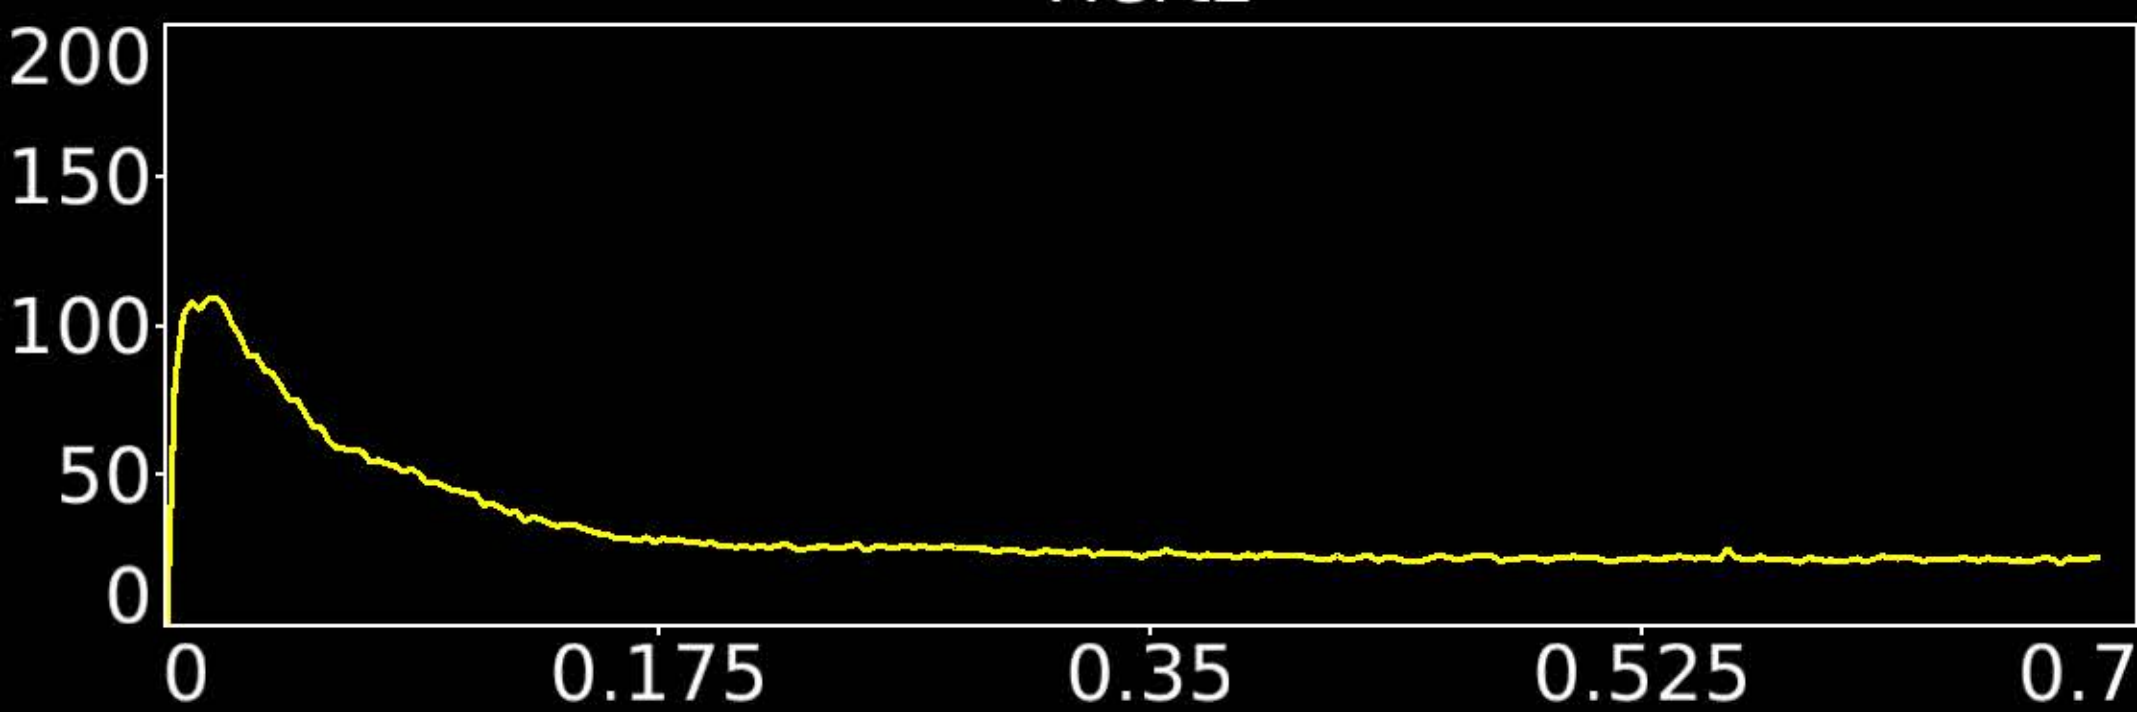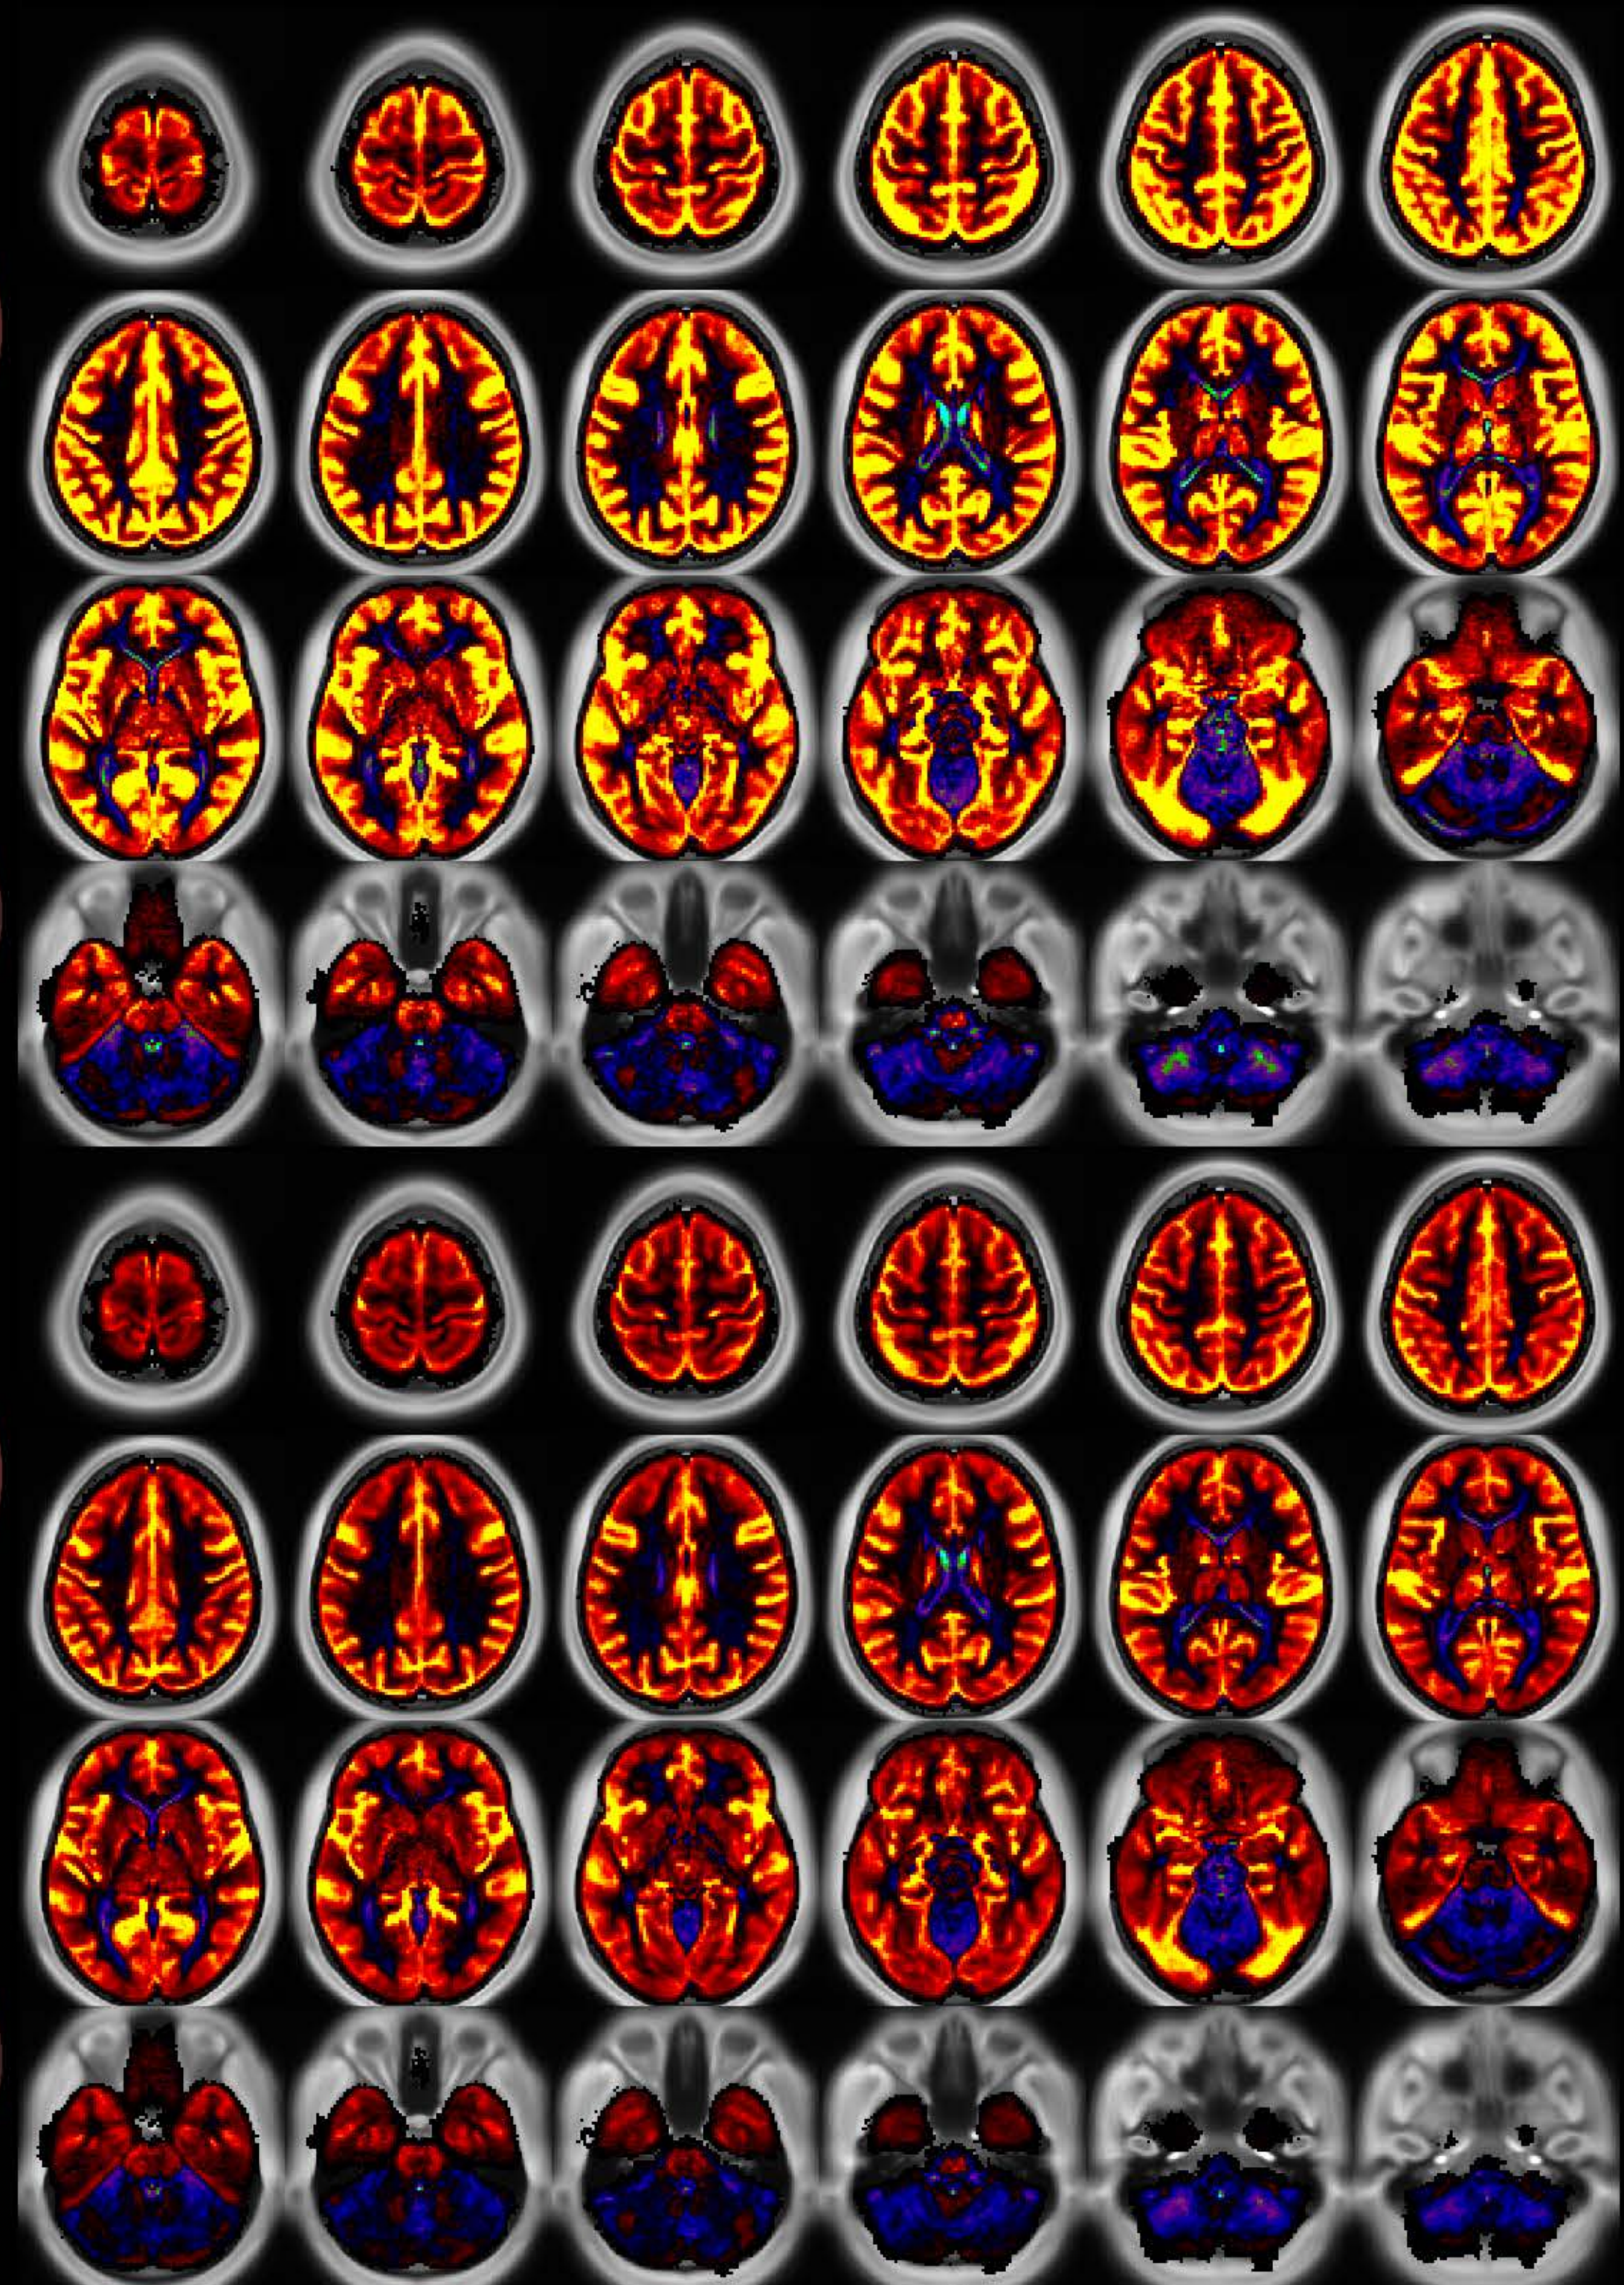

Seconds

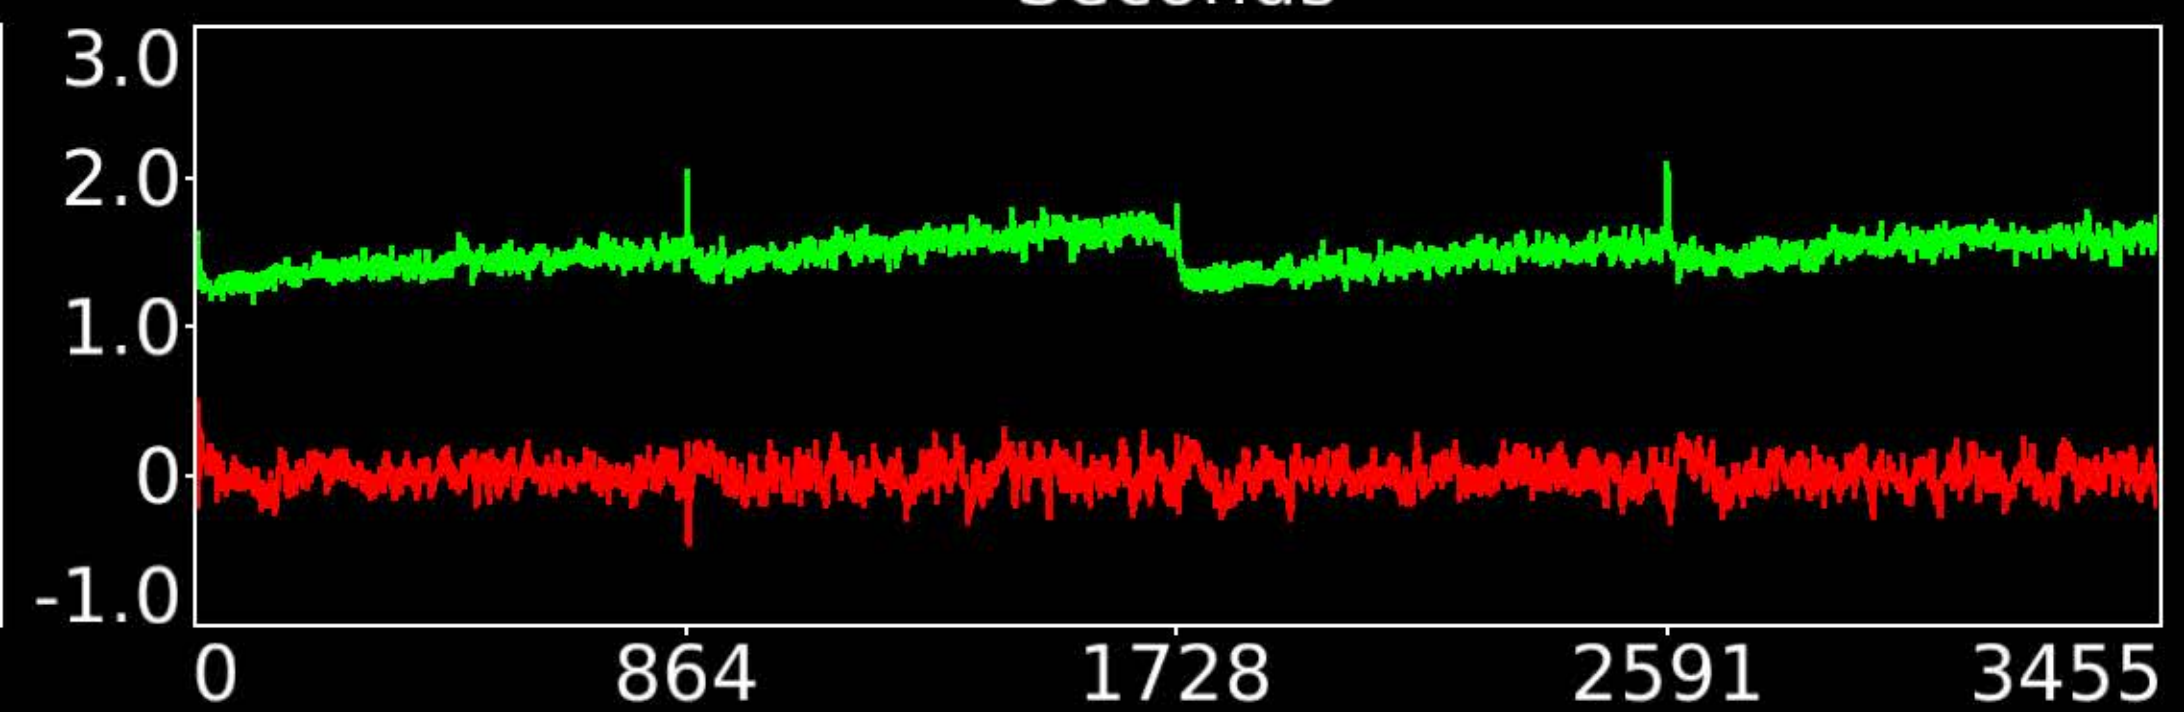

|                         |                                                       |                            |
|-------------------------|-------------------------------------------------------|----------------------------|
| Number & Class: 3 Noise | Name: Global Physiological Noise (Without Cerebellum) |                            |
| RVT Correlated: Yes     | DVARS Dip Associated: Yes                             | Cross-Subject Variable: No |
| Single Subject: No      | % Variance Explained: 3.13                            | Globality Index: 2.23      |
| Task Component: 1       | Taskr Component: 1                                    | Sleep Noted: No            |

Rationale: Globally positive component except for cerebellum that is globally negative; which could be due to differing vascular supplies of these structures



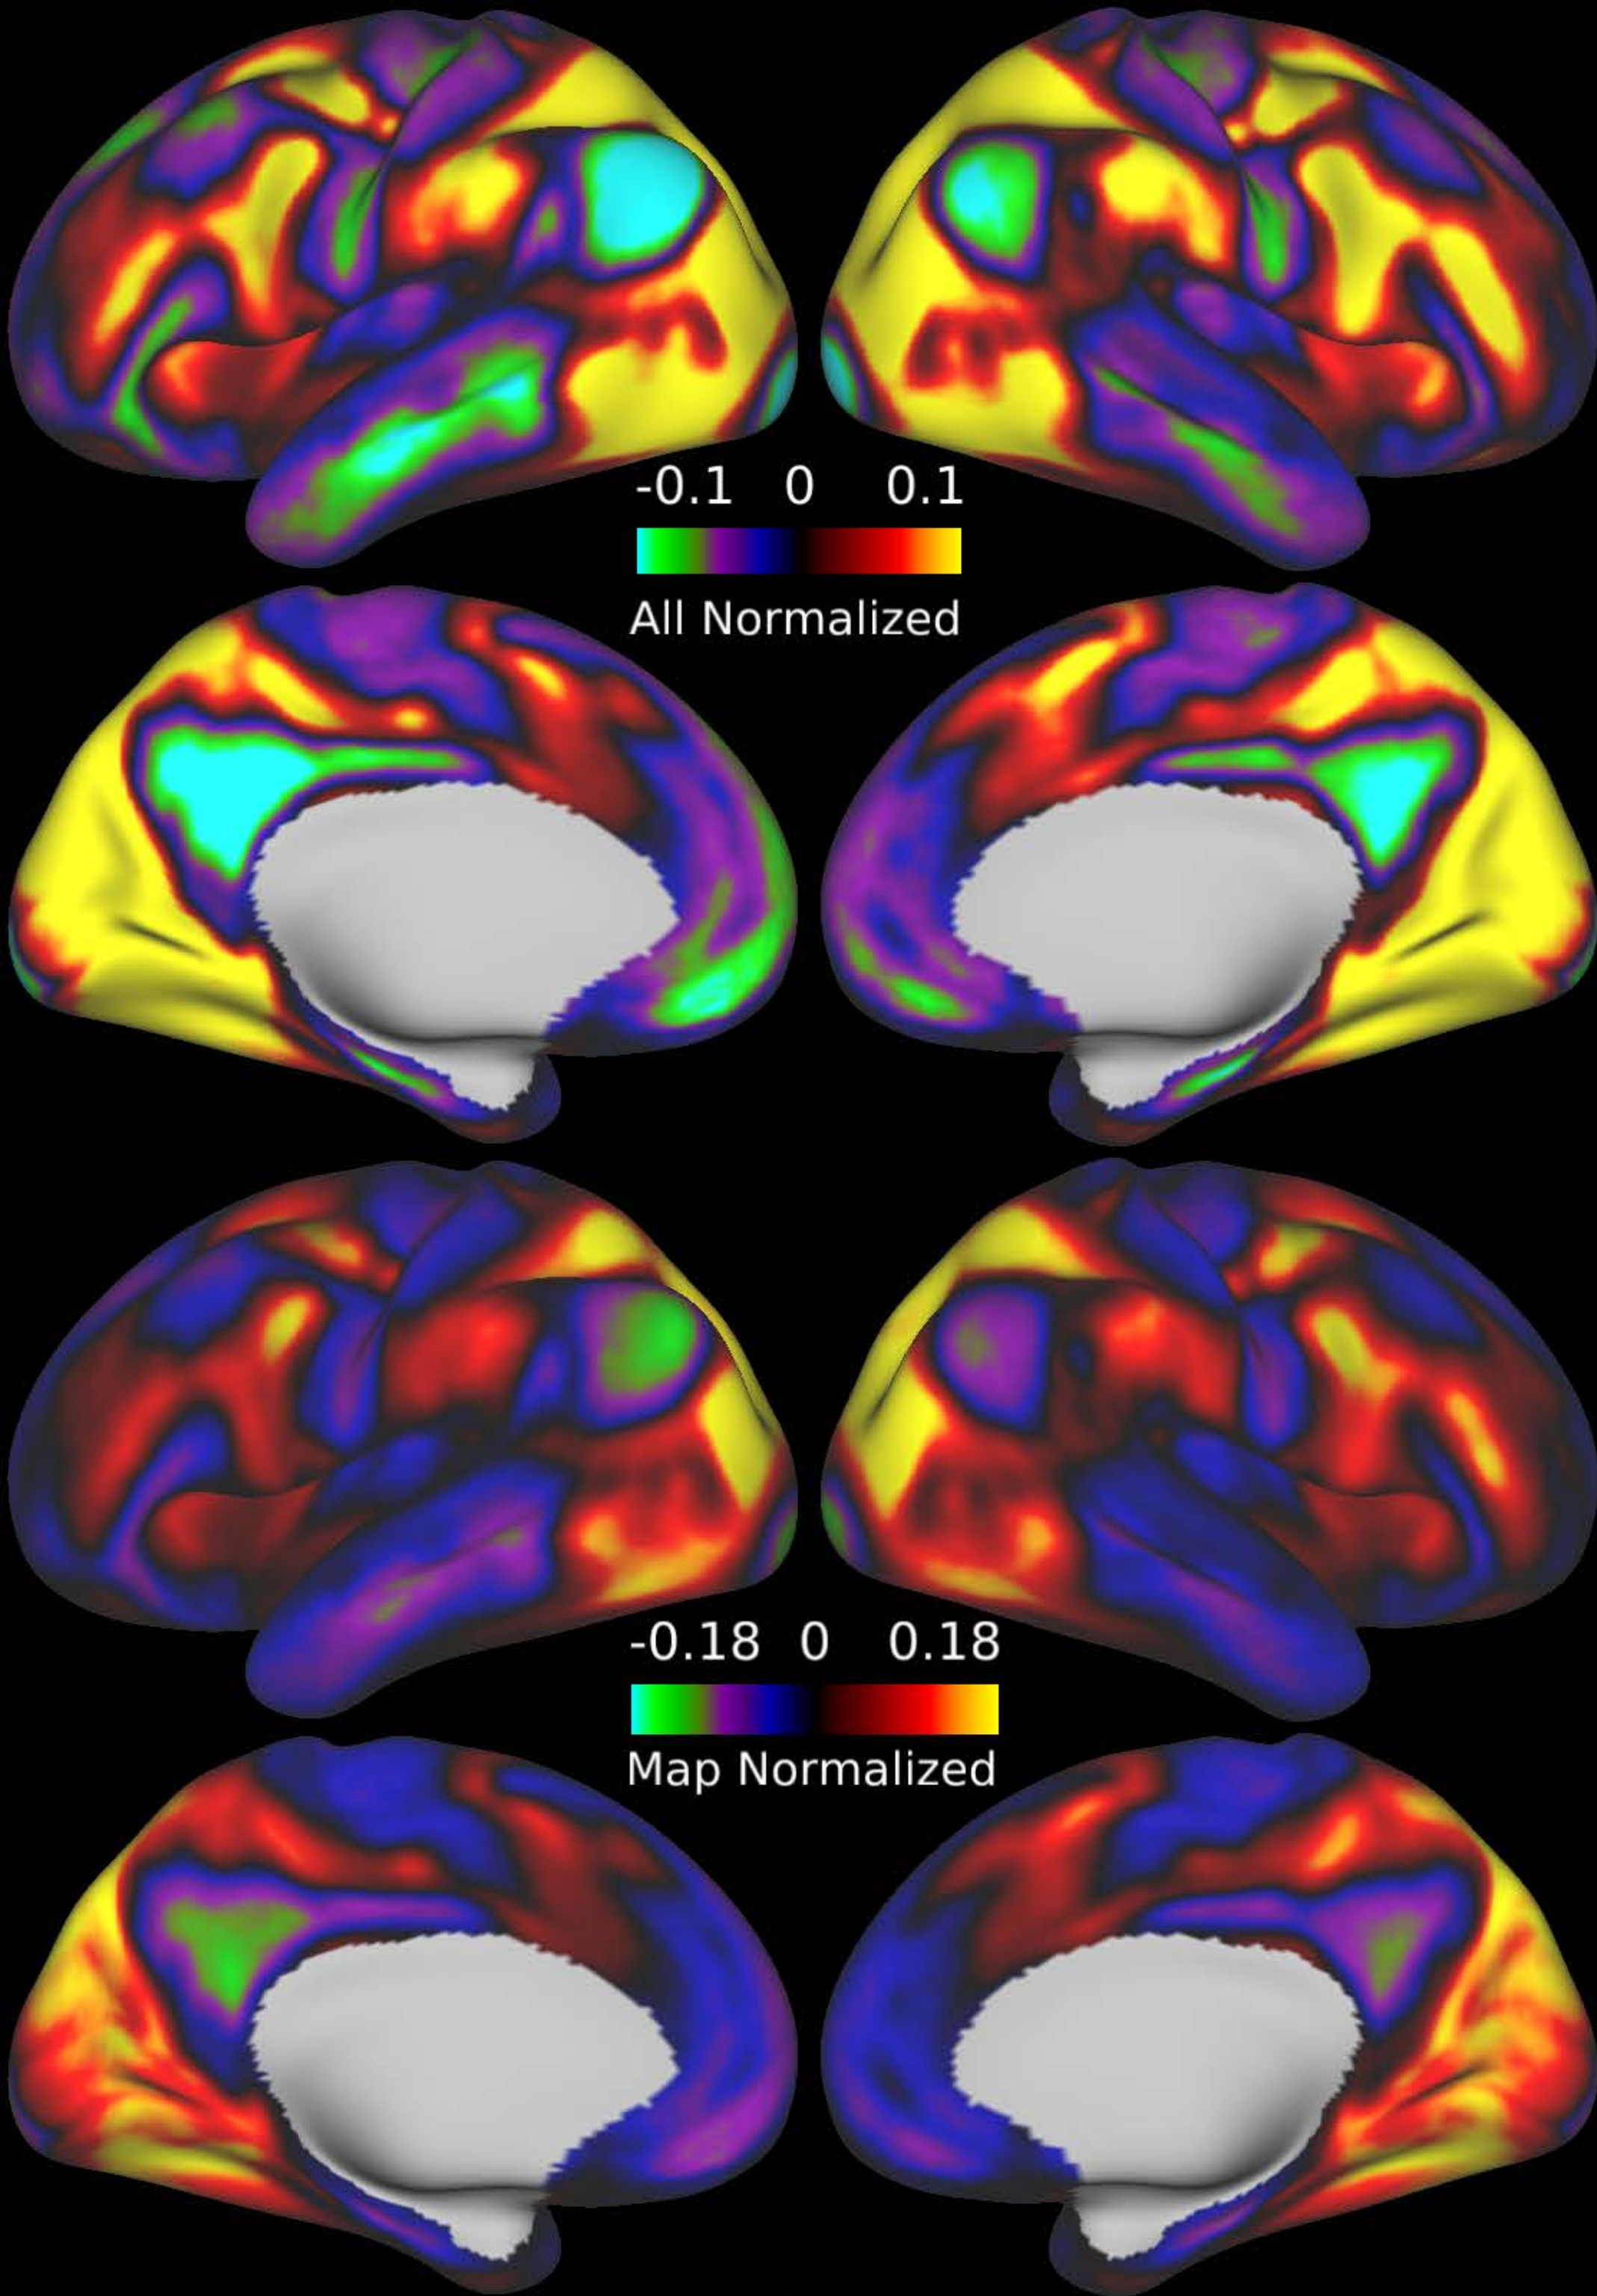

Hertz

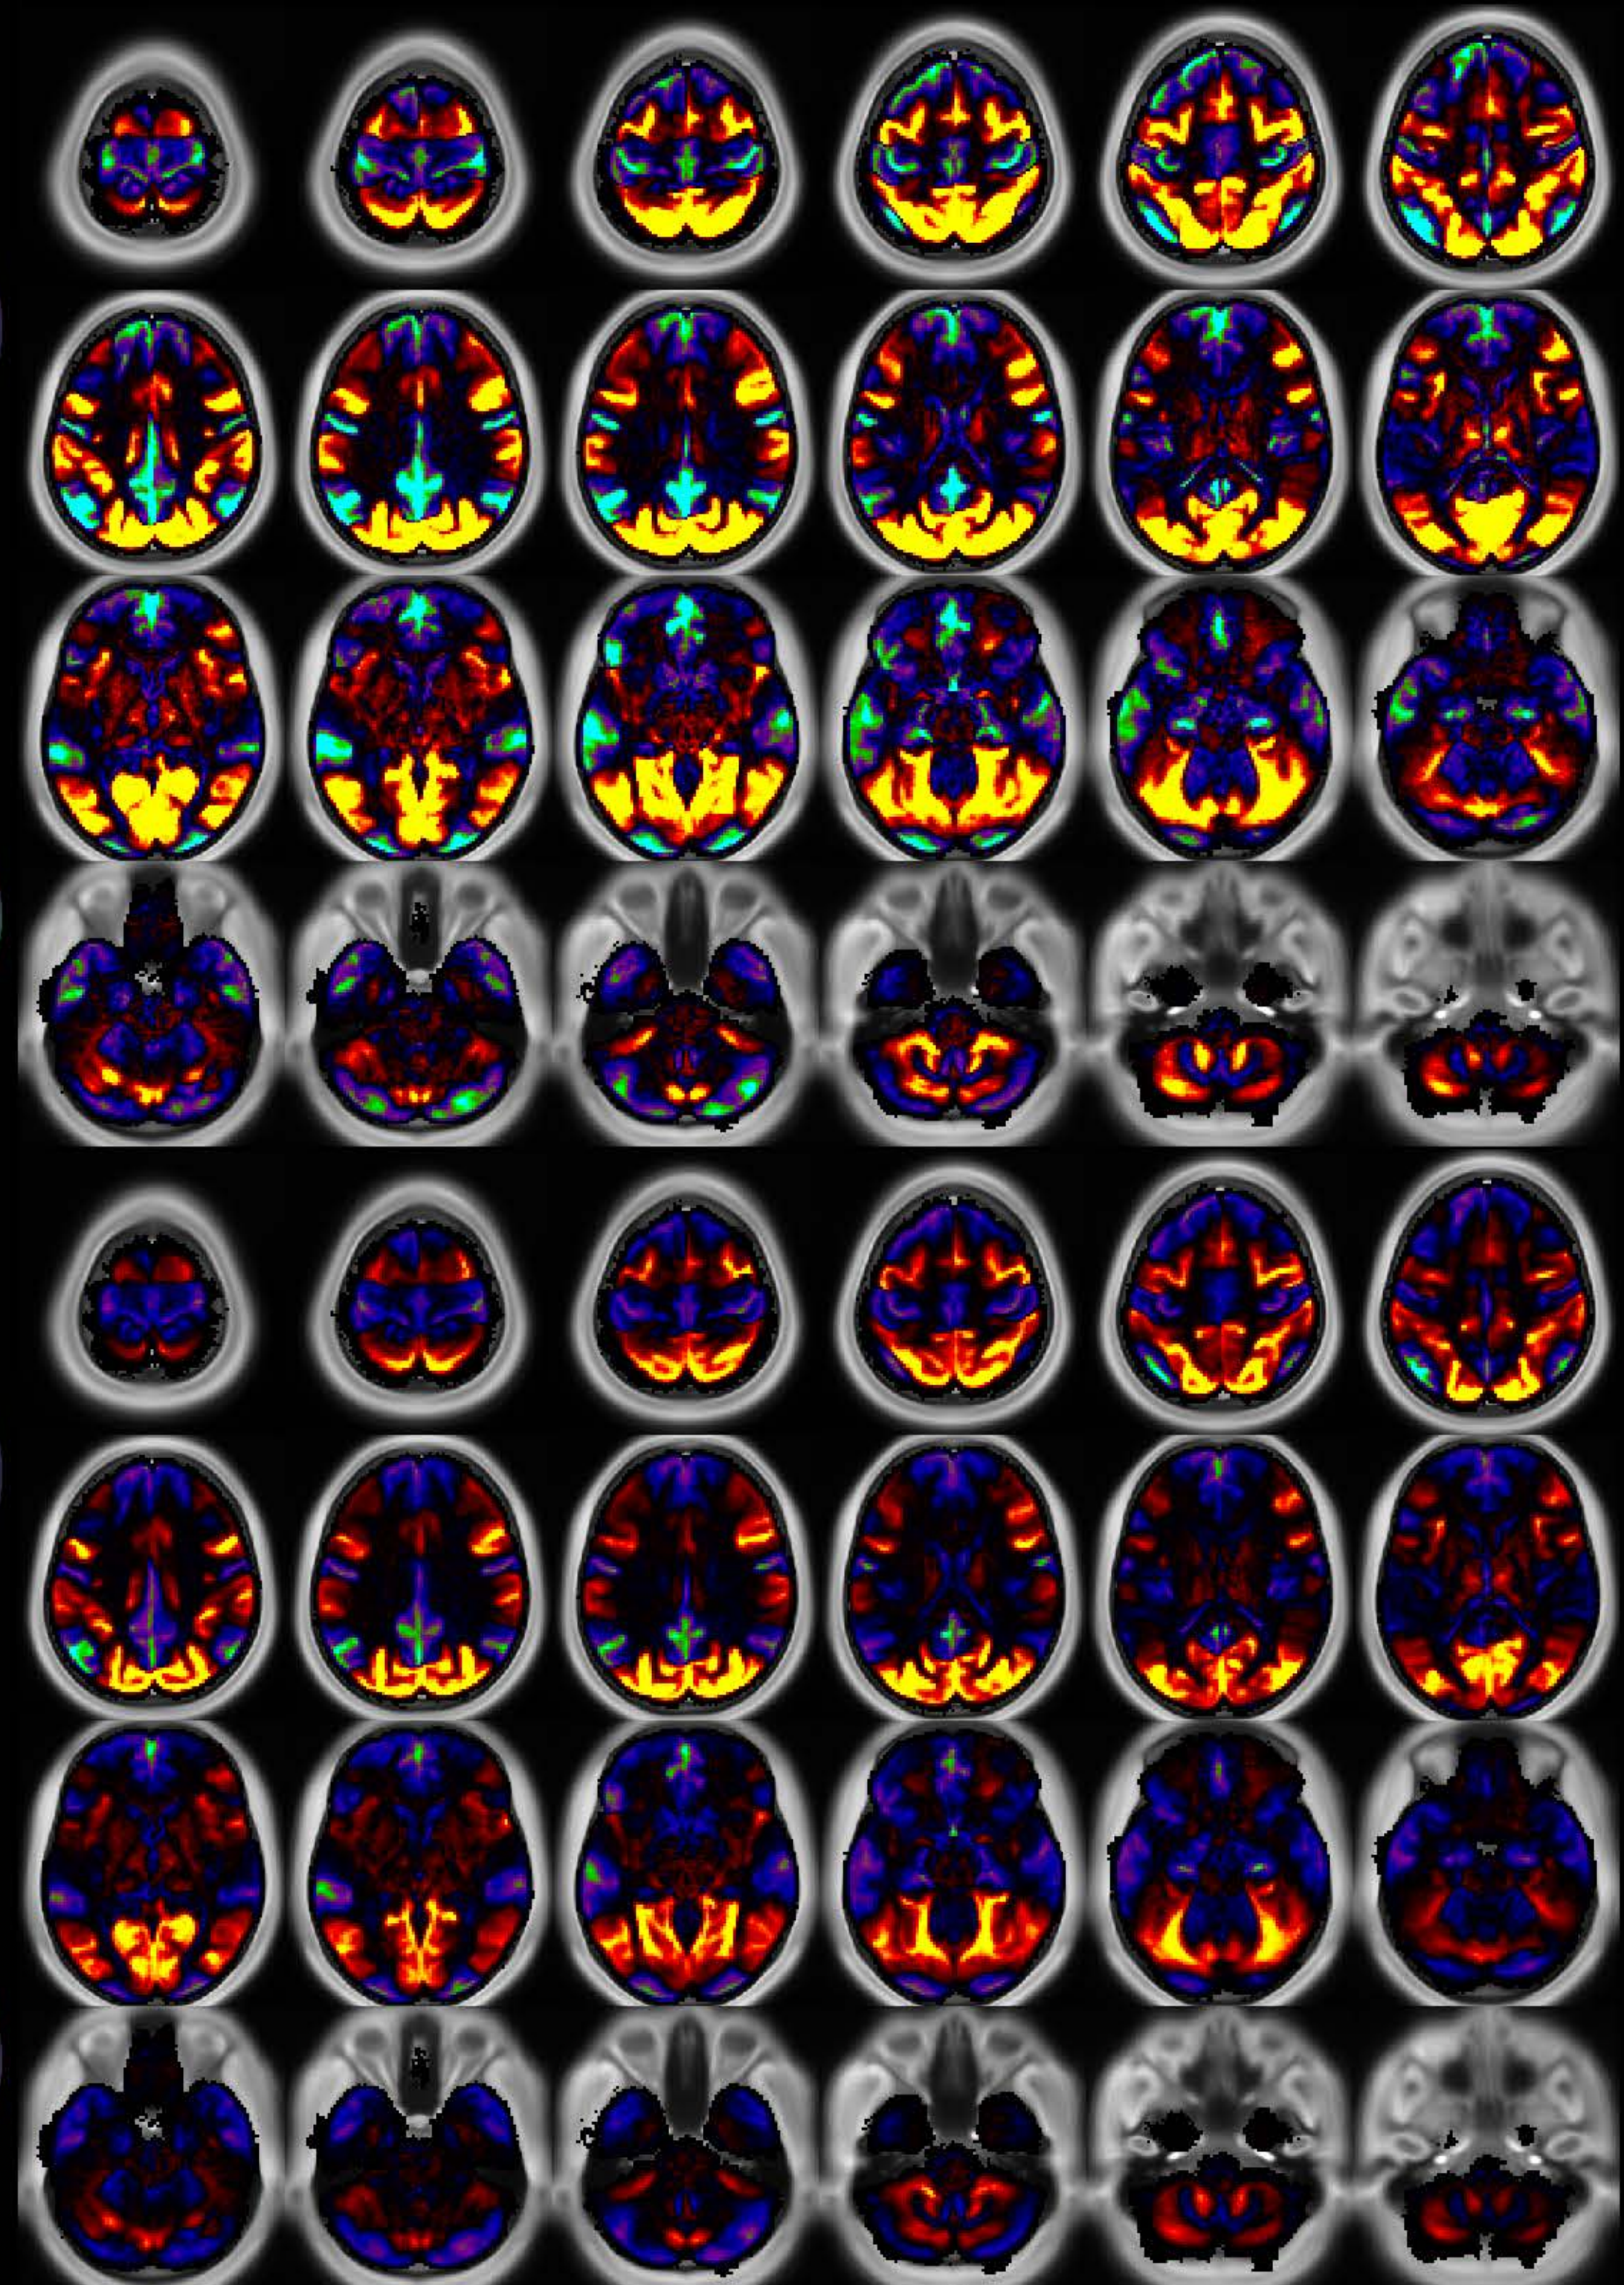

Seconds

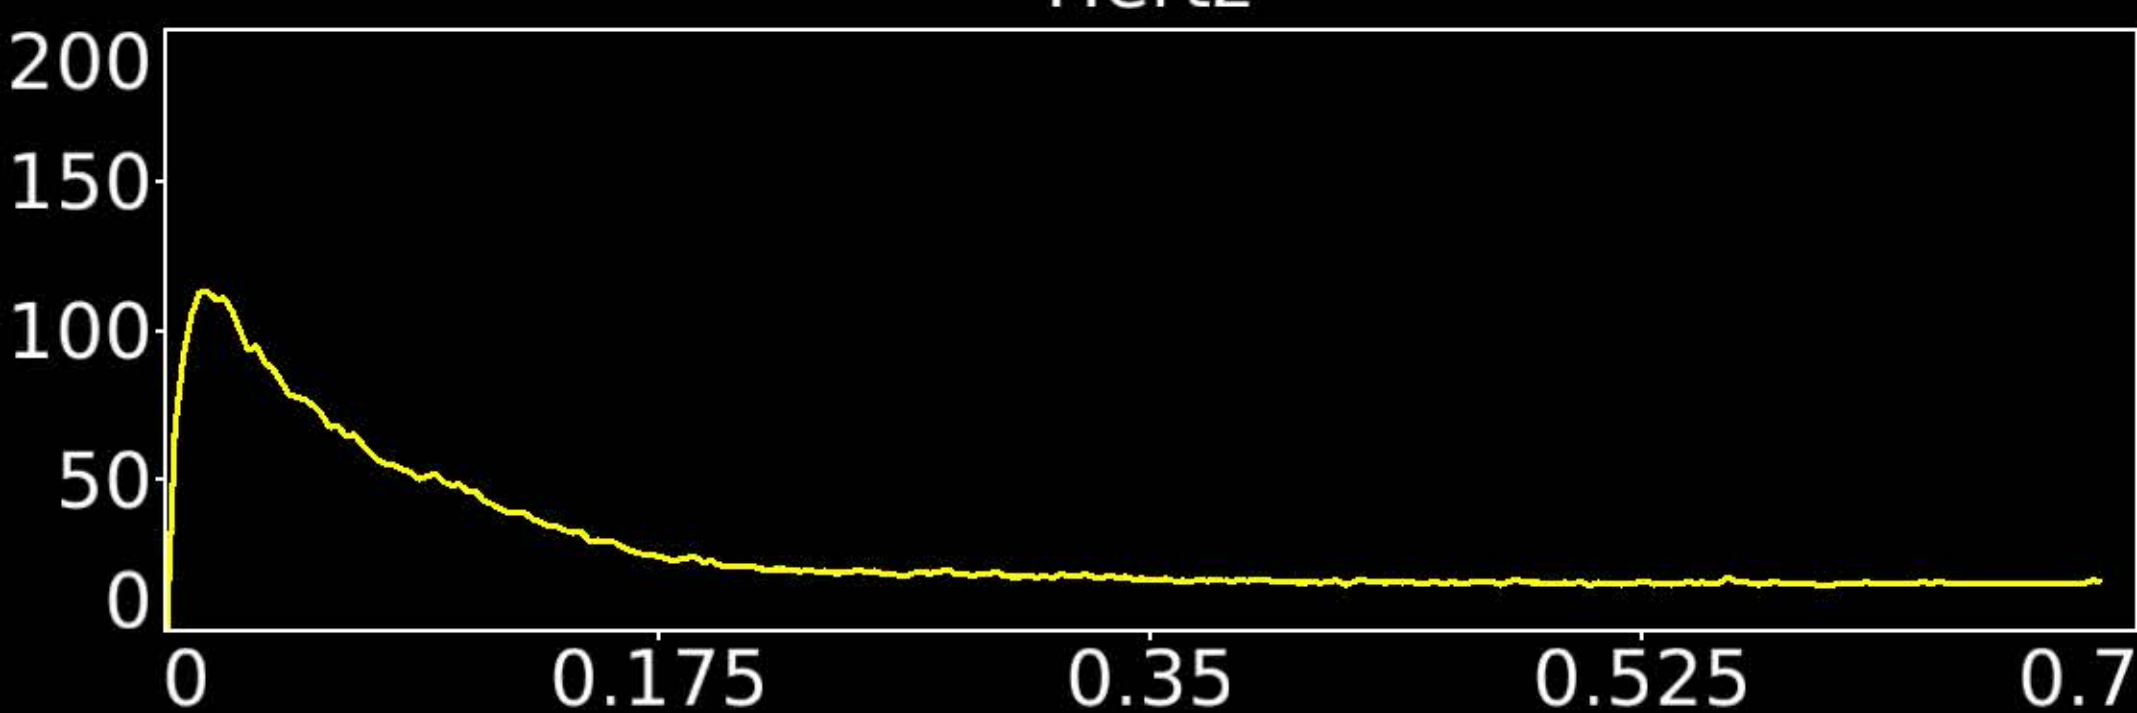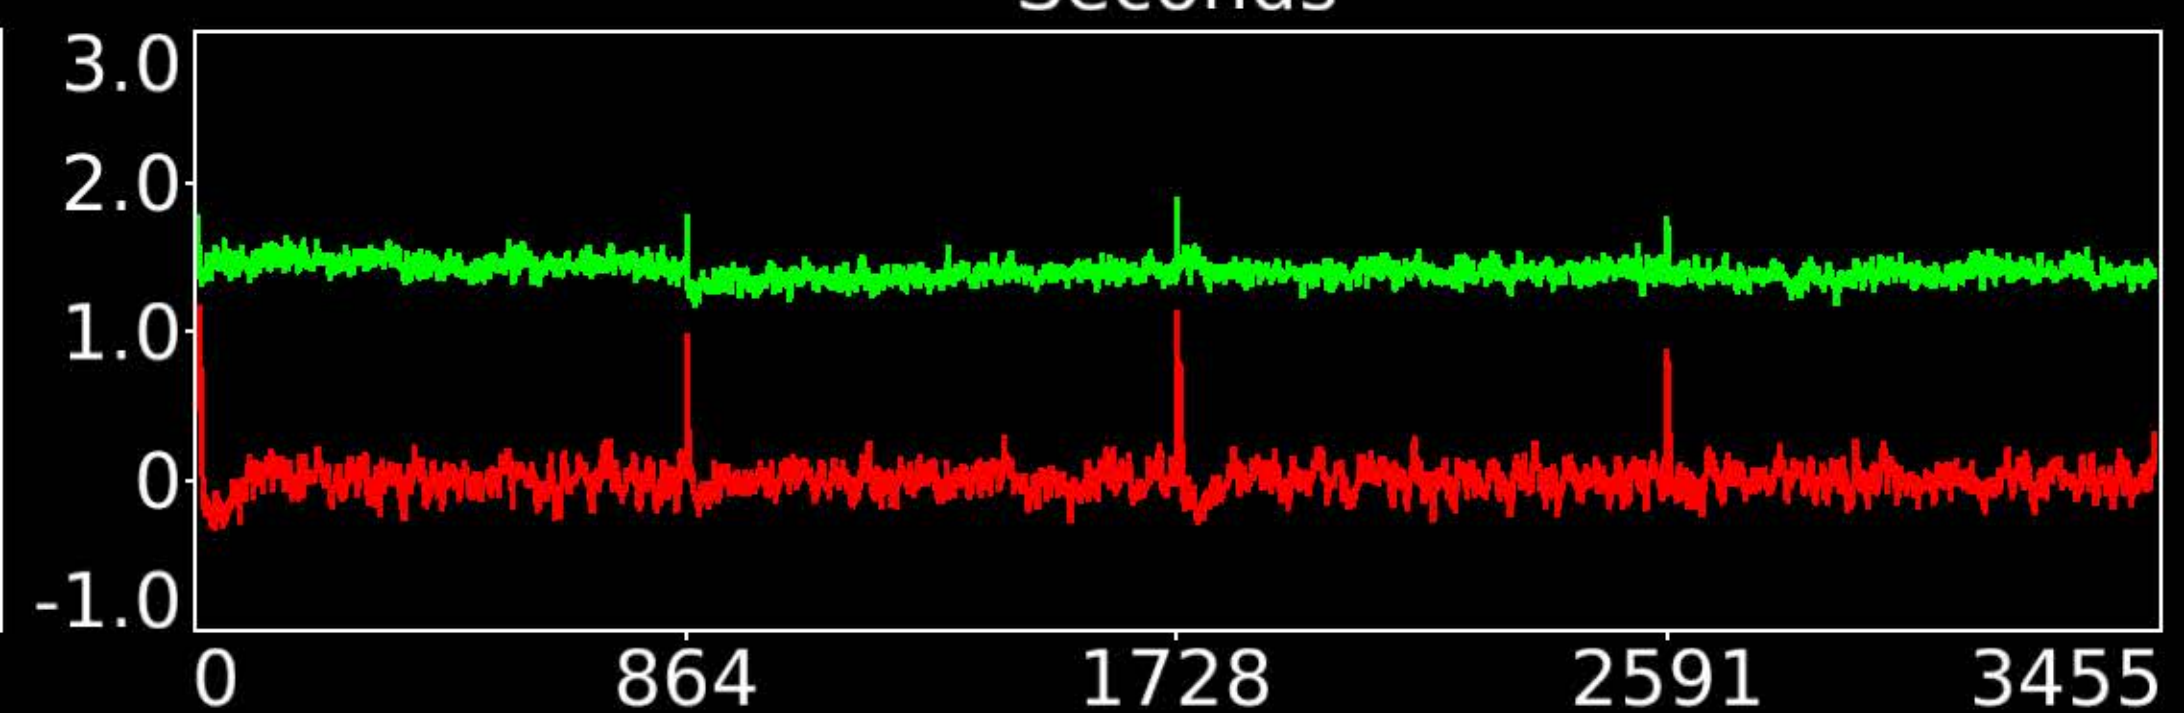

|                          |                                                       |                            |
|--------------------------|-------------------------------------------------------|----------------------------|
| Number & Class: 4 Signal | Name: Pan Visual (Peripheral > FoveaL) > Default Mode |                            |
| RVT Correlated: No       | DVARS Dip Associated: No                              | Cross-Subject Variable: No |
| Single Subject: No       | % Variance Explained: 3.15                            | Globality Index: 0.16      |
| Task Component: No       | Taskr Component: 3                                    | Sleep Noted: No            |

Rationale: Spatial map includes positive and negative patches that respect known RSNs (e.g. Default Mode Network)



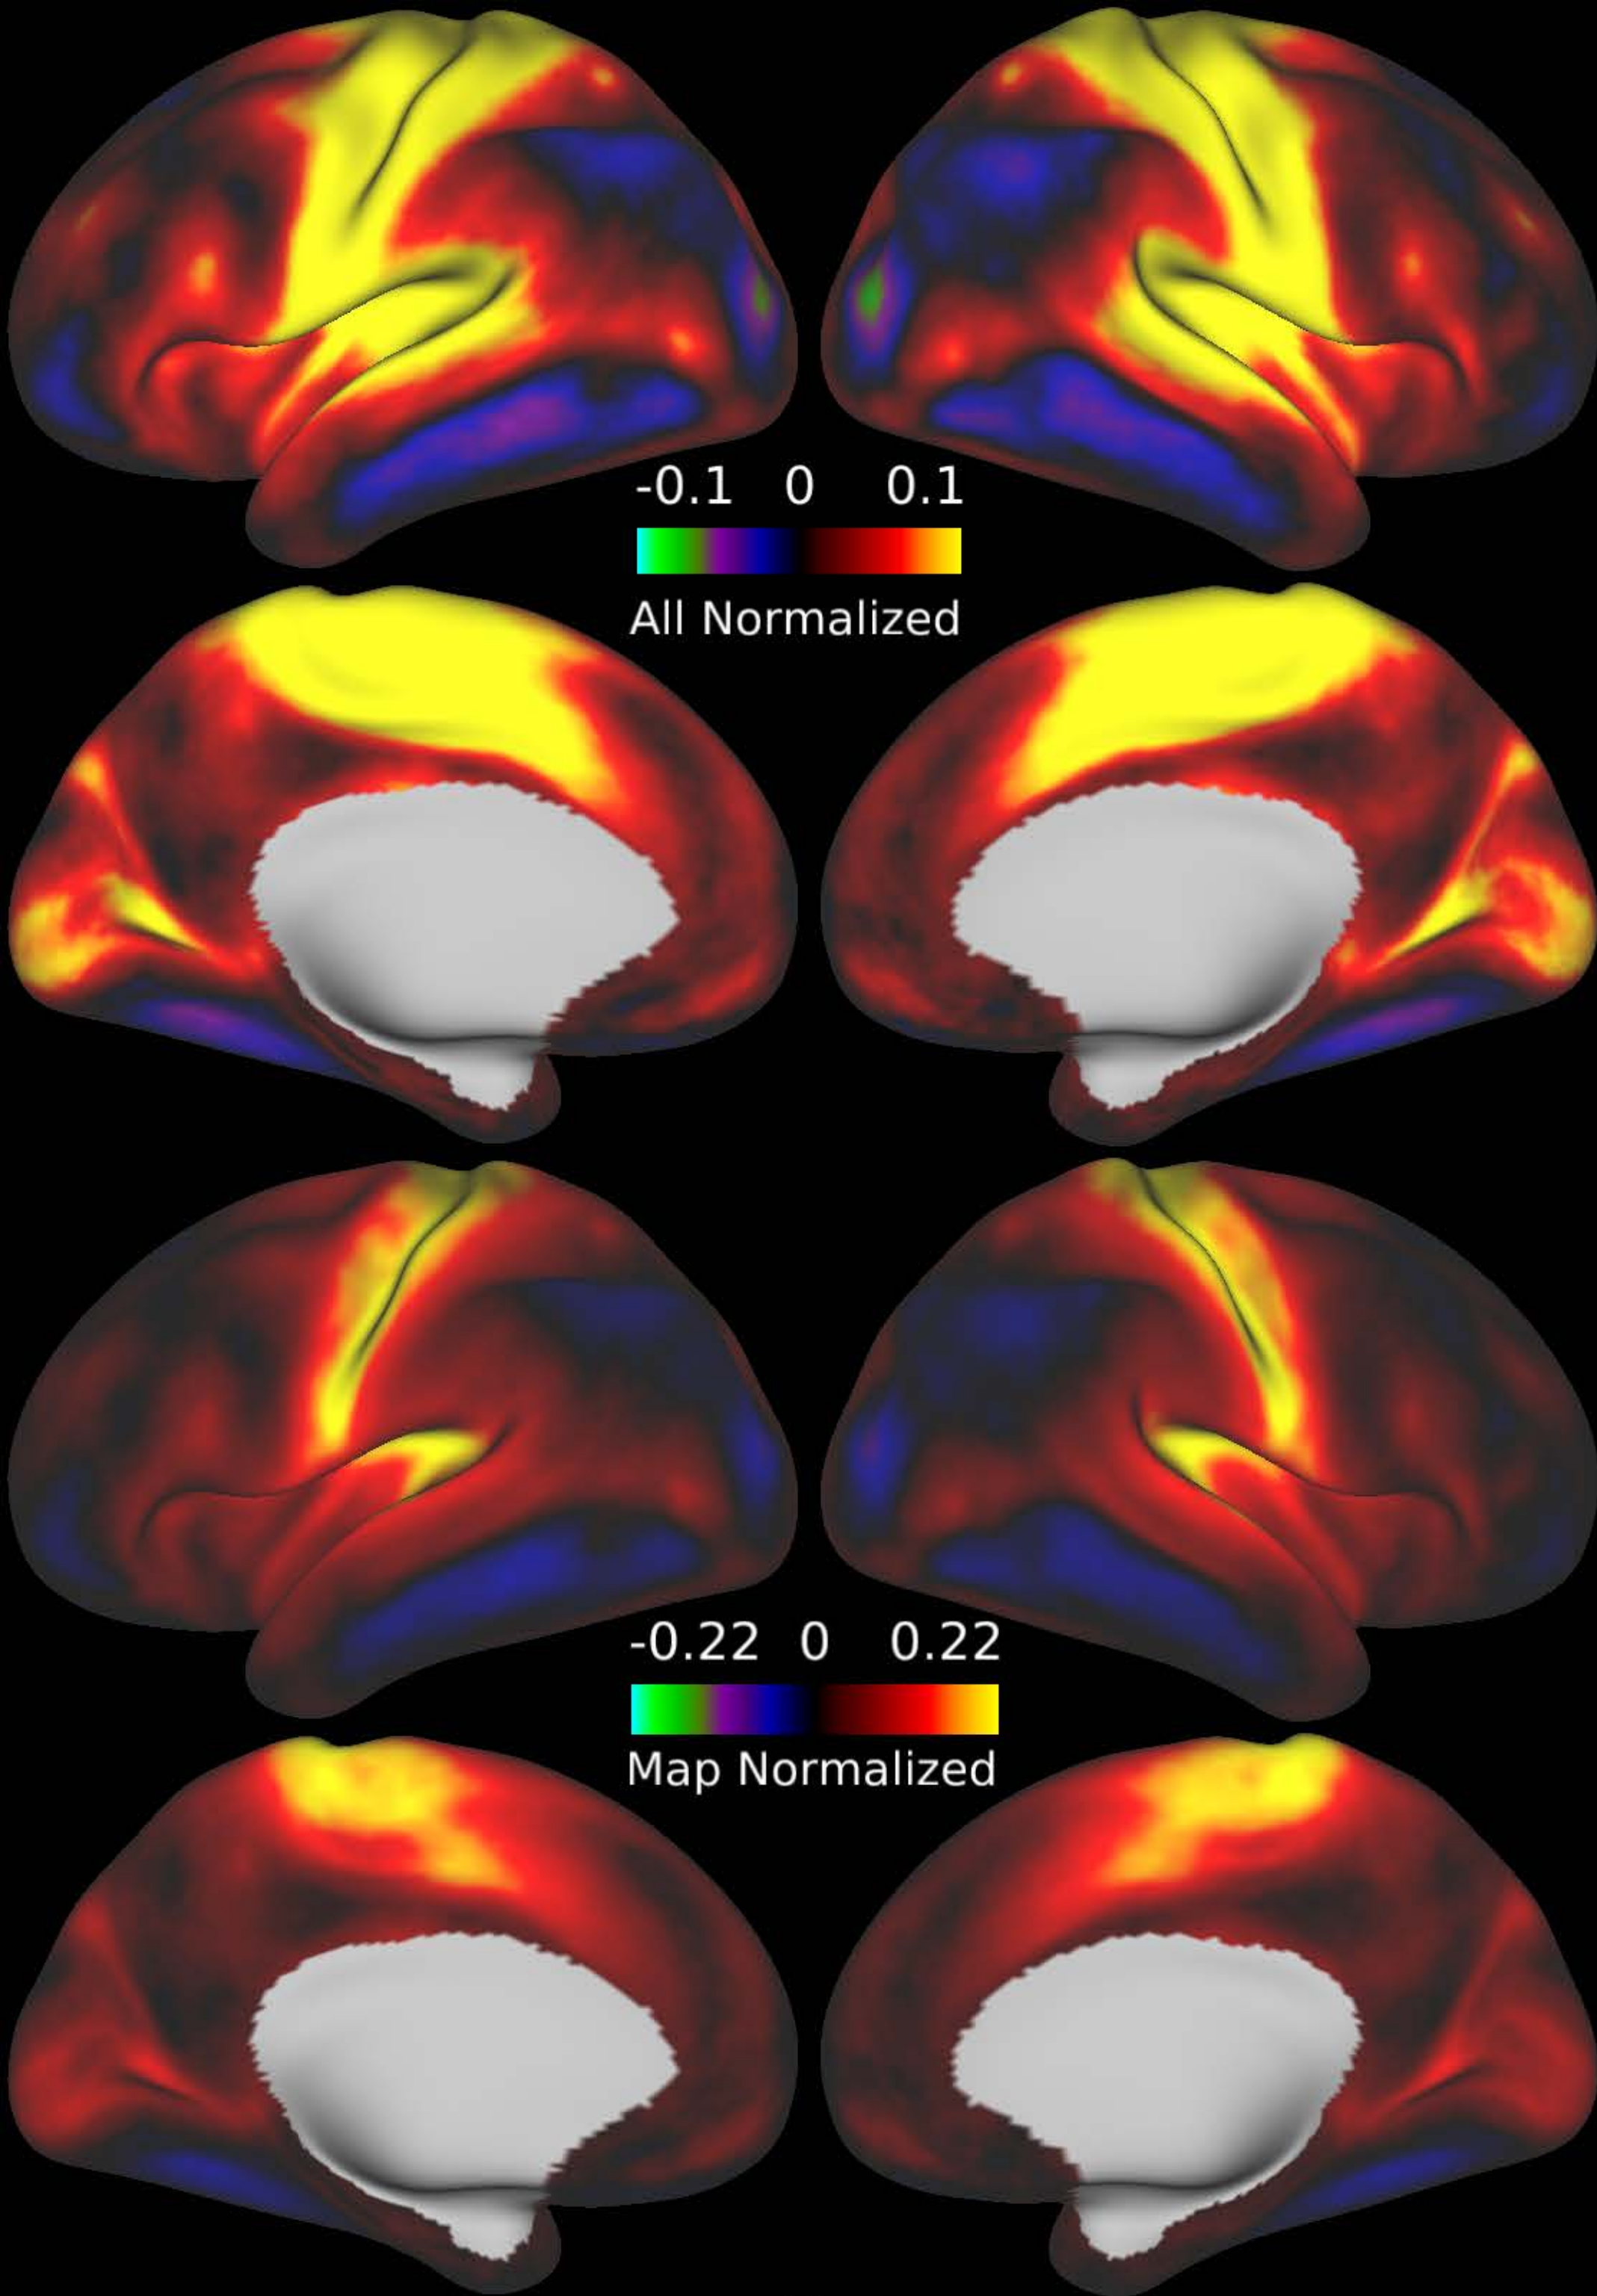

Hertz

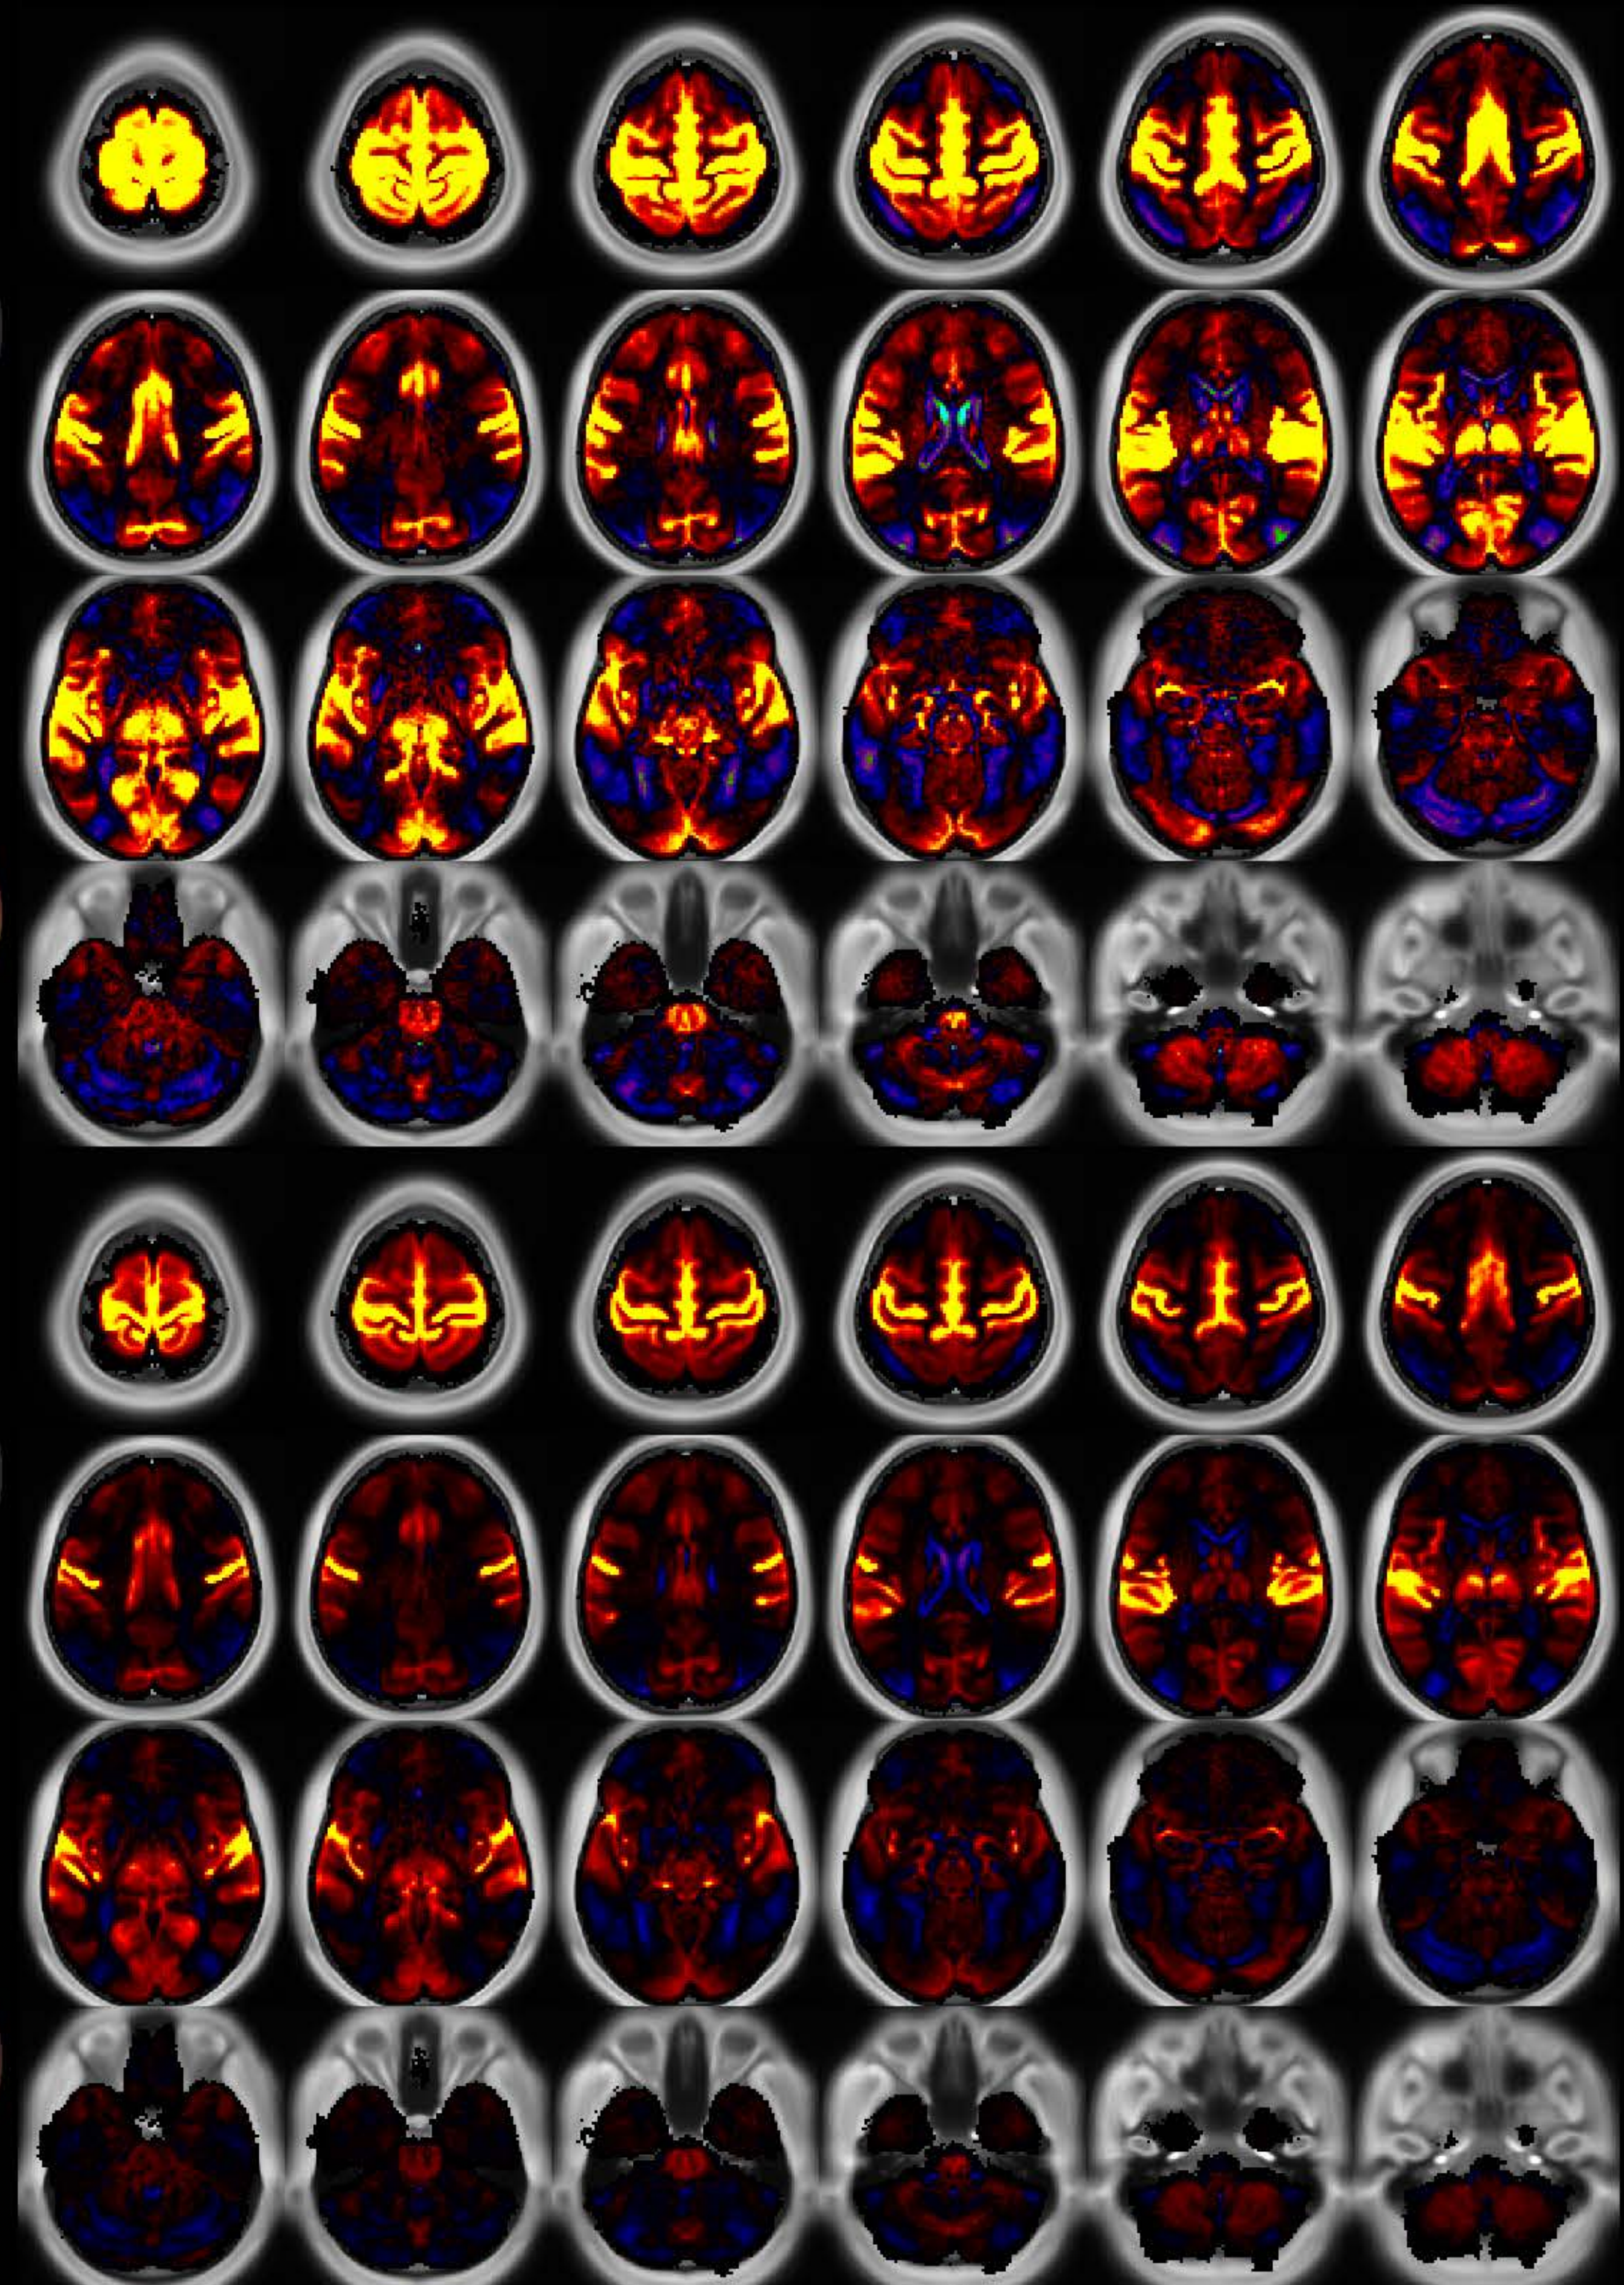

Seconds

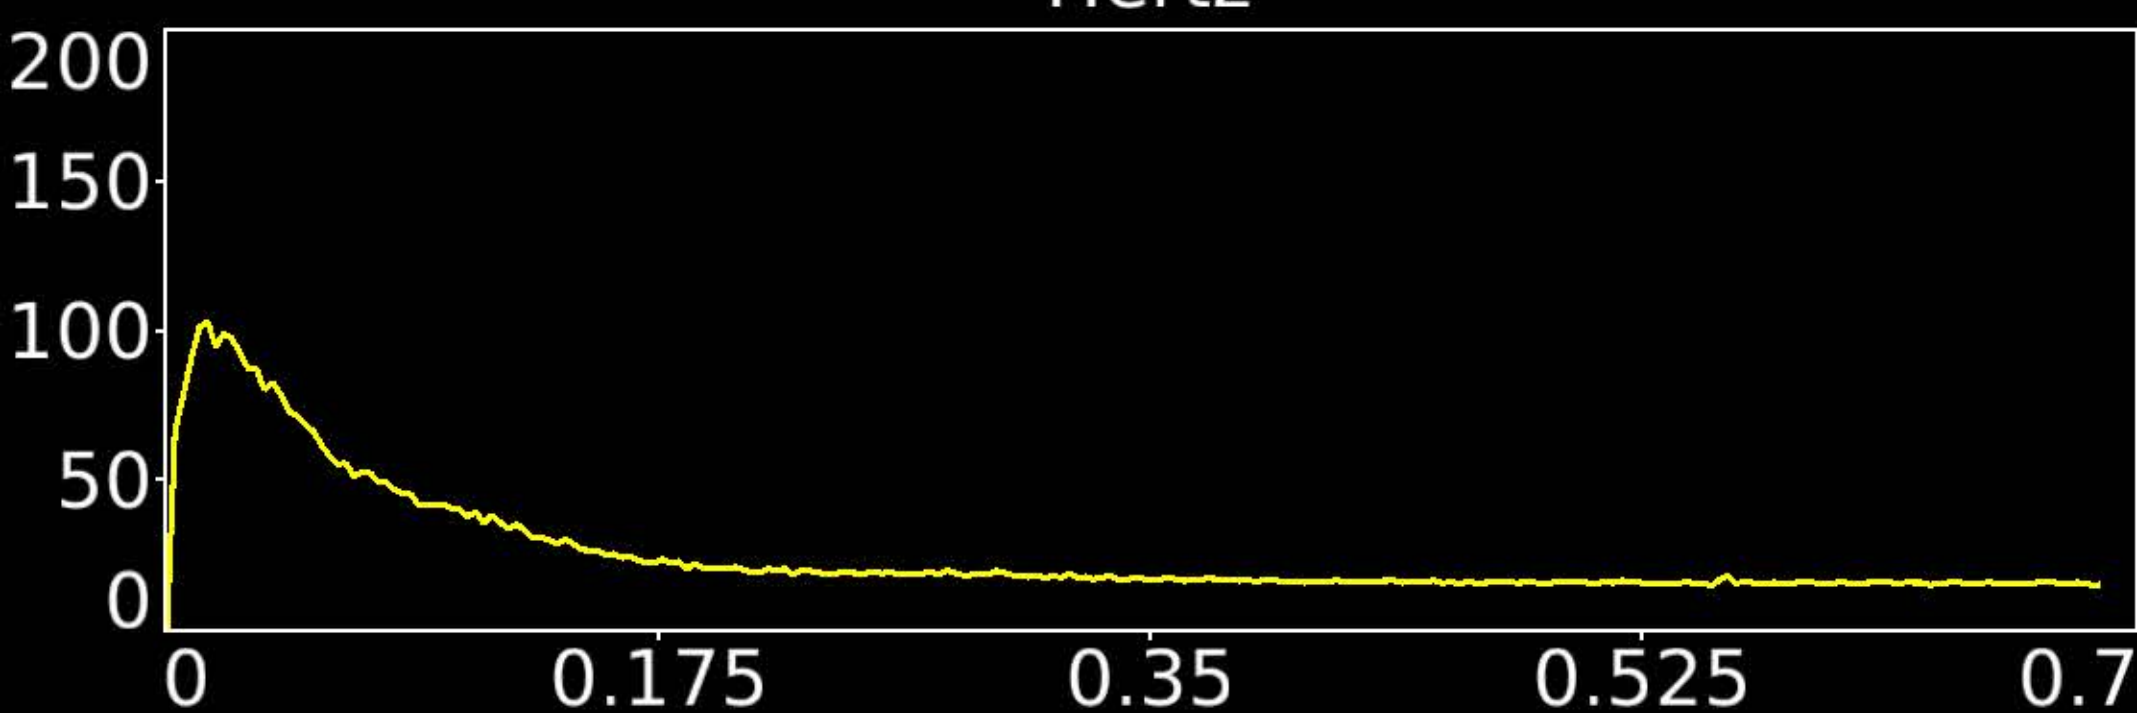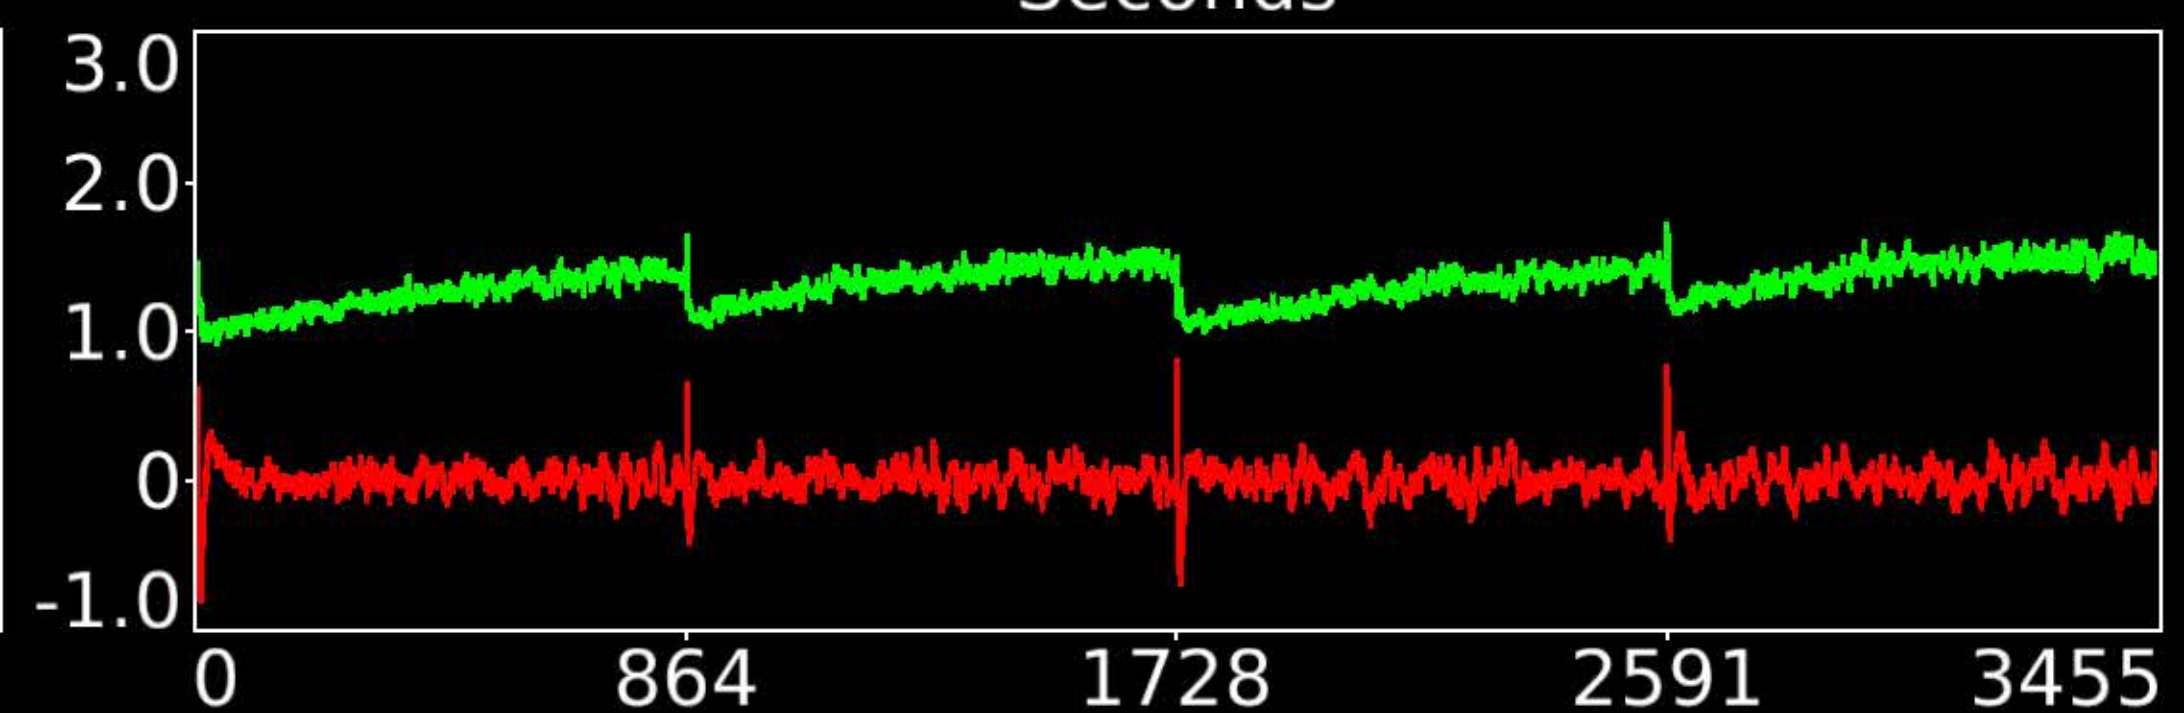

|                          |                                      |                             |
|--------------------------|--------------------------------------|-----------------------------|
| Number & Class: 5 Signal | Name: Early Sensori-Motor + Auditory |                             |
| RVT Correlated: No       | DVARS Dip Associated: No             | Cross-Subject Variable: Yes |
| Single Subject: No       | % Variance Explained: 2.87           | Globality Index: 1.84       |
| Task Component: 23       | Taskr Component: No                  | Sleep Noted: Yes            |

Rationale: Spatial map includes positive and negative patches that respect known areal boundaries (e.g. around MT+); most specific to sensori-motor cortex



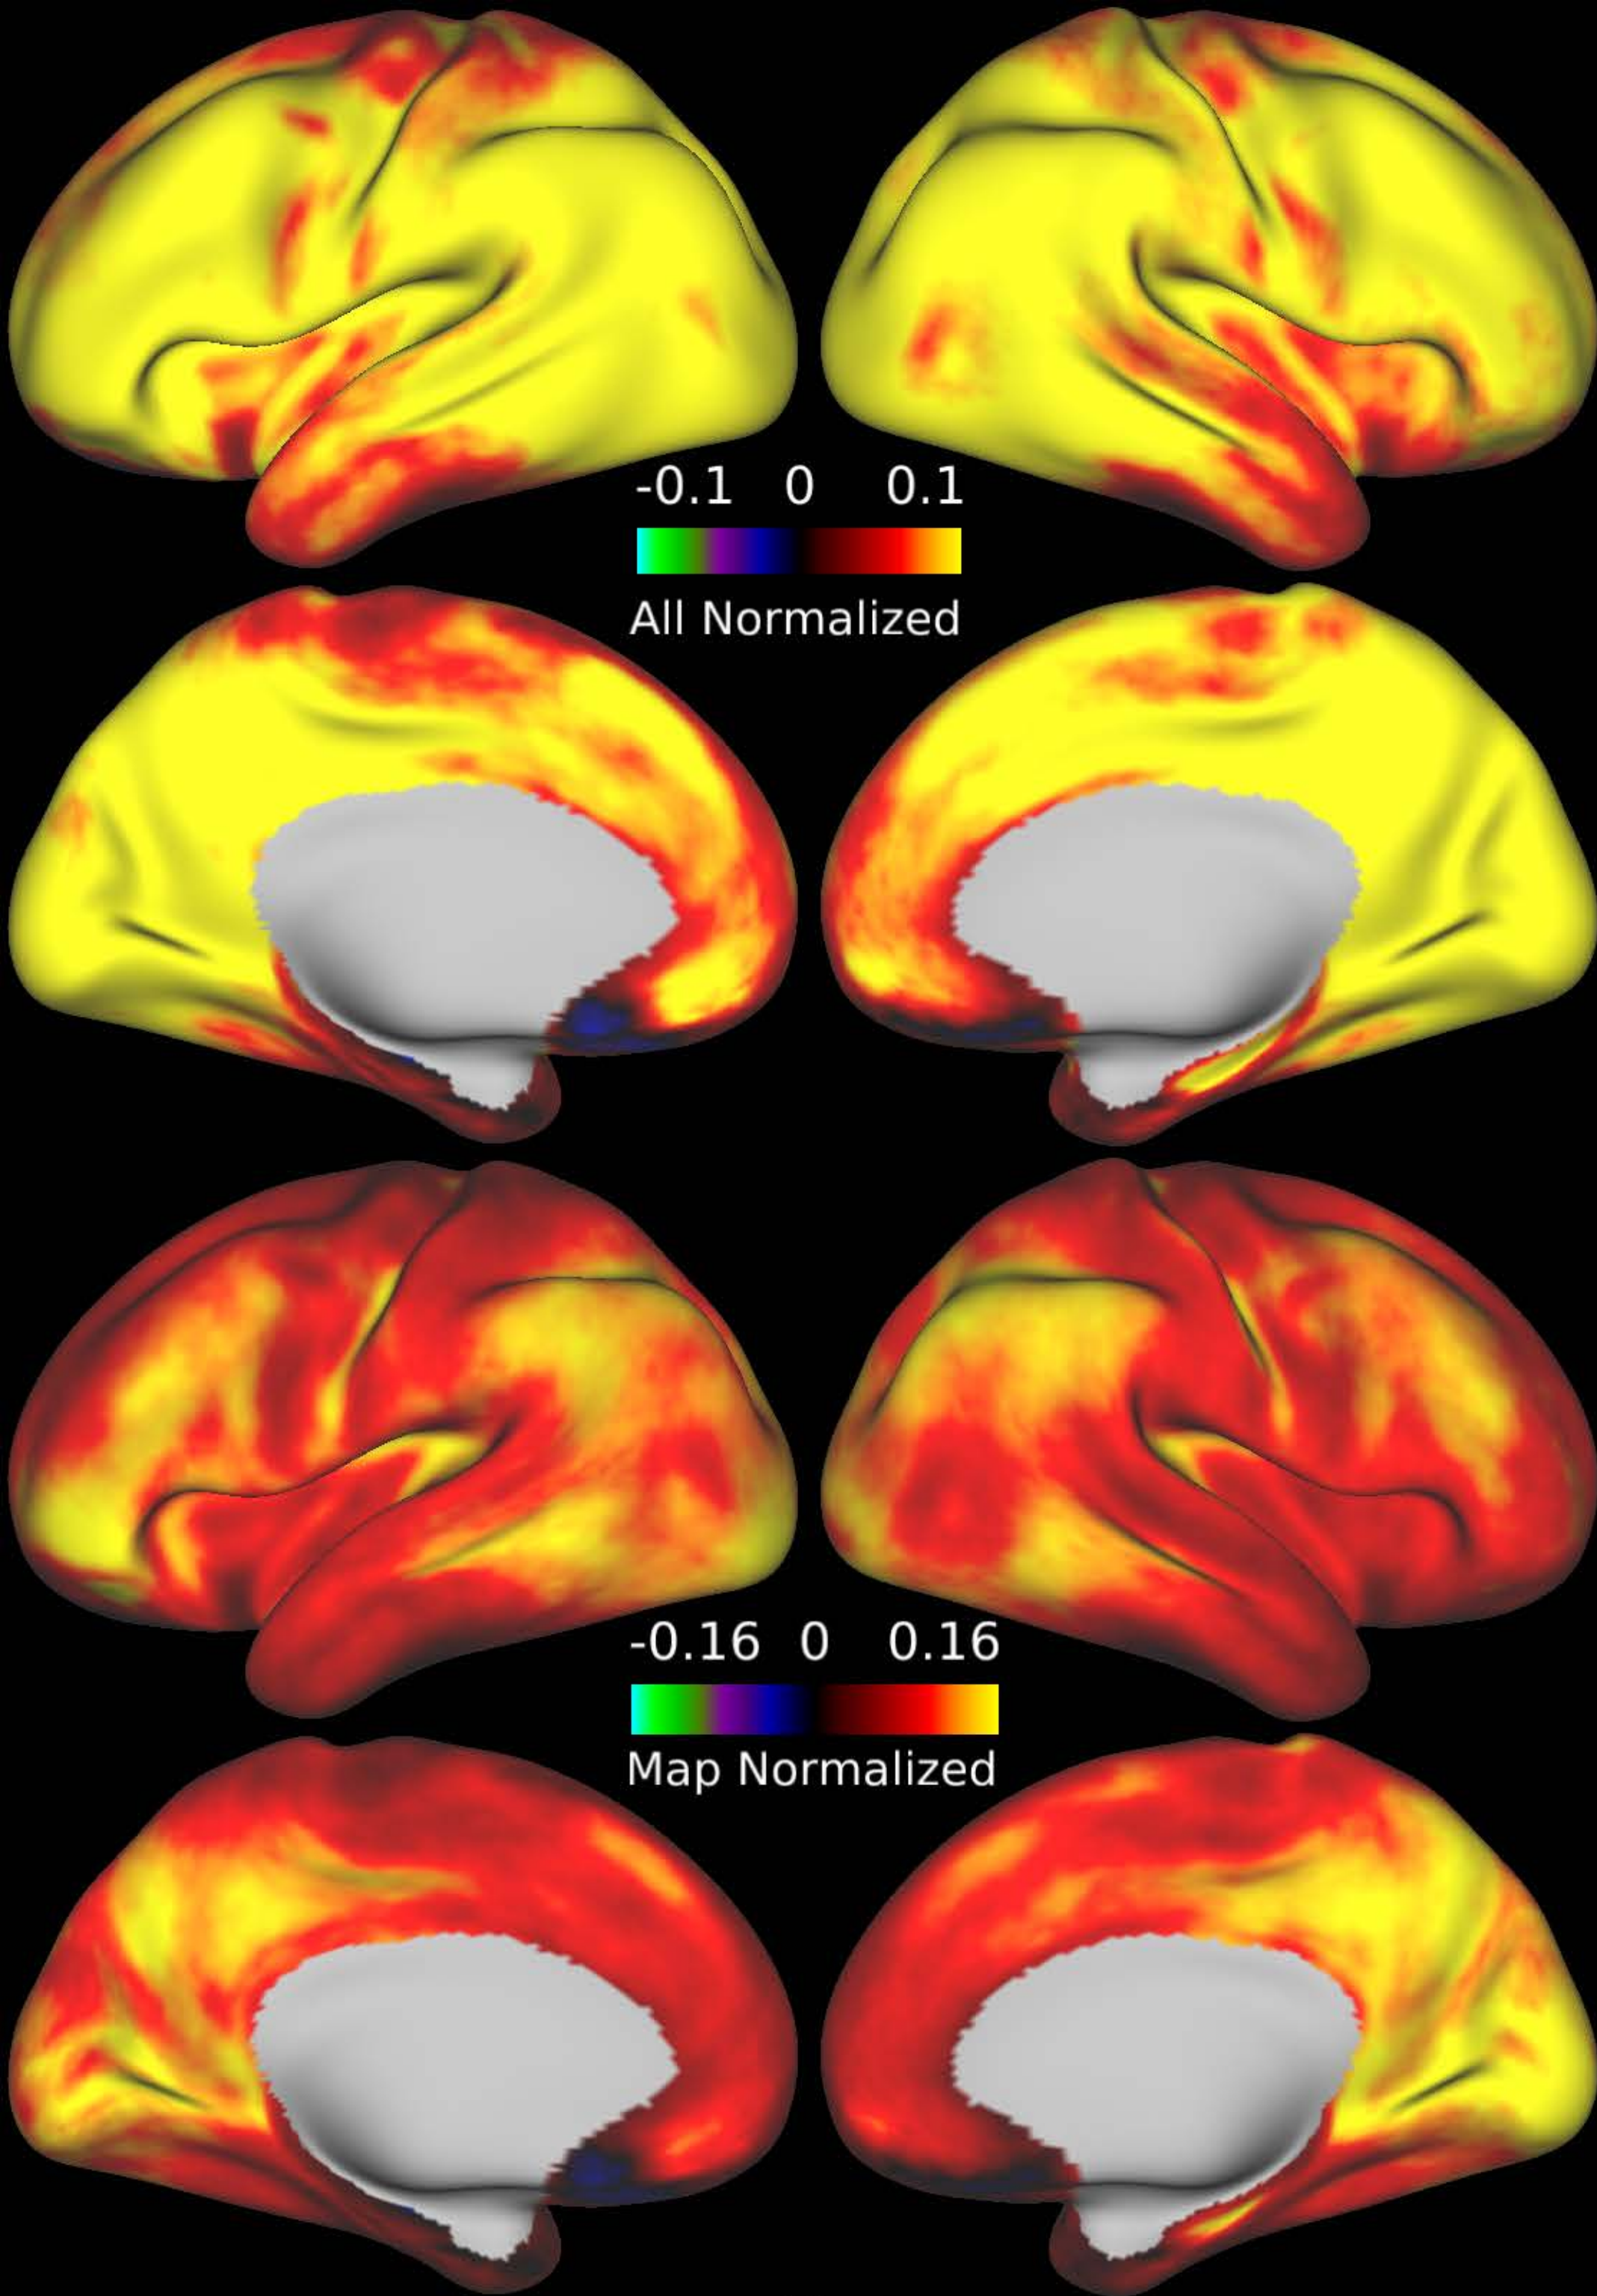

Hertz

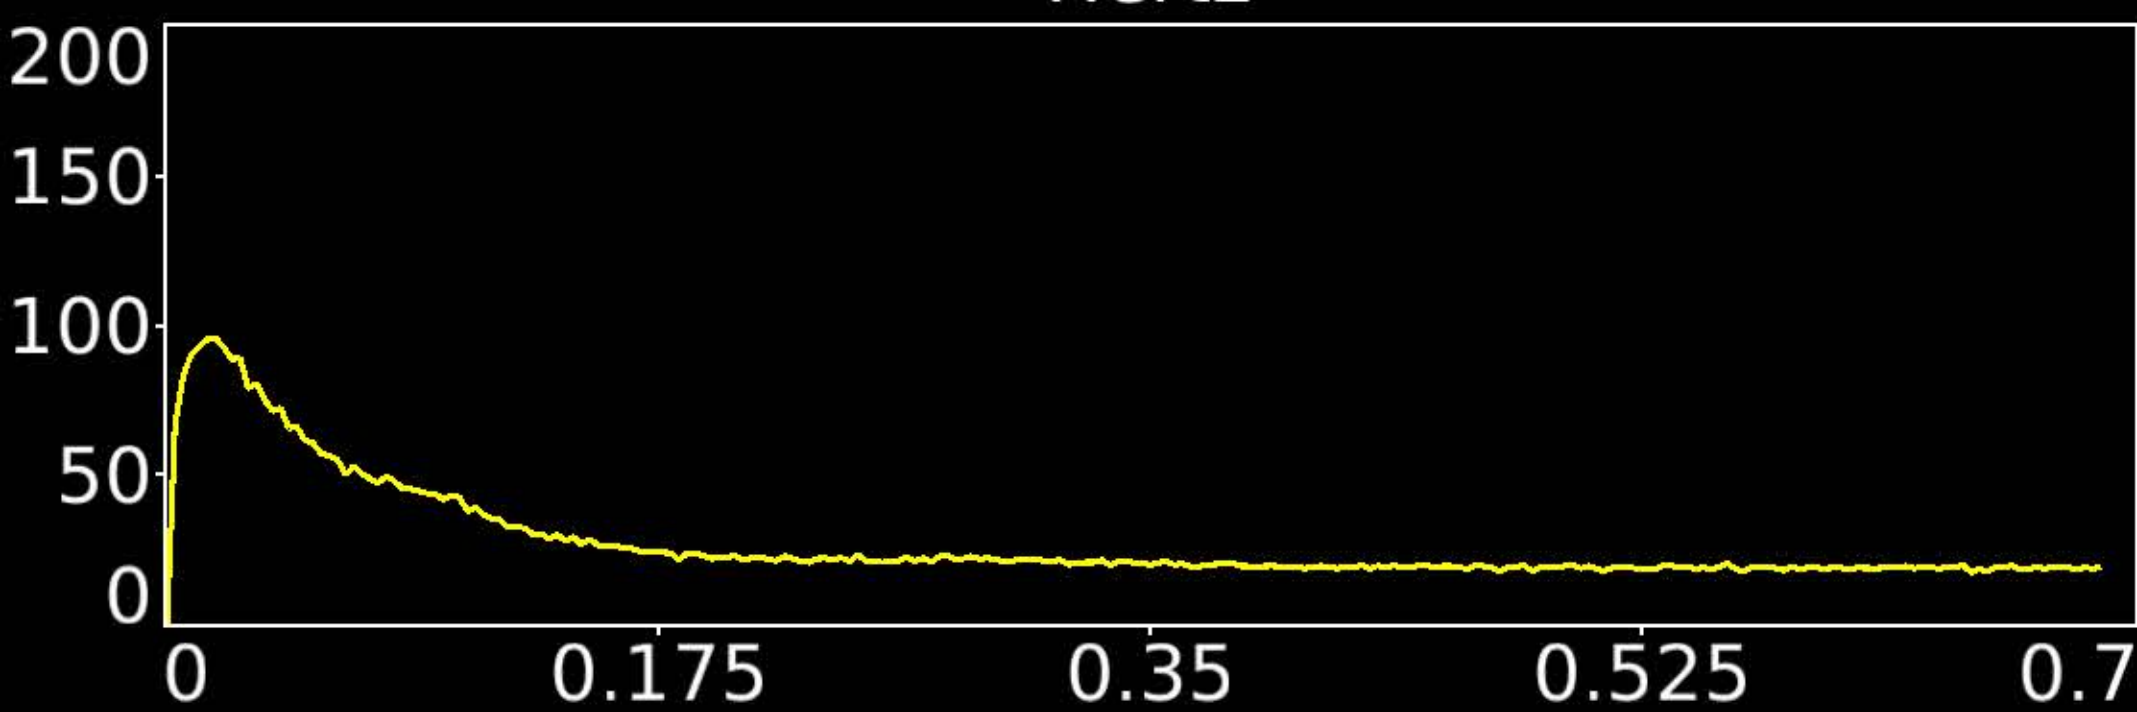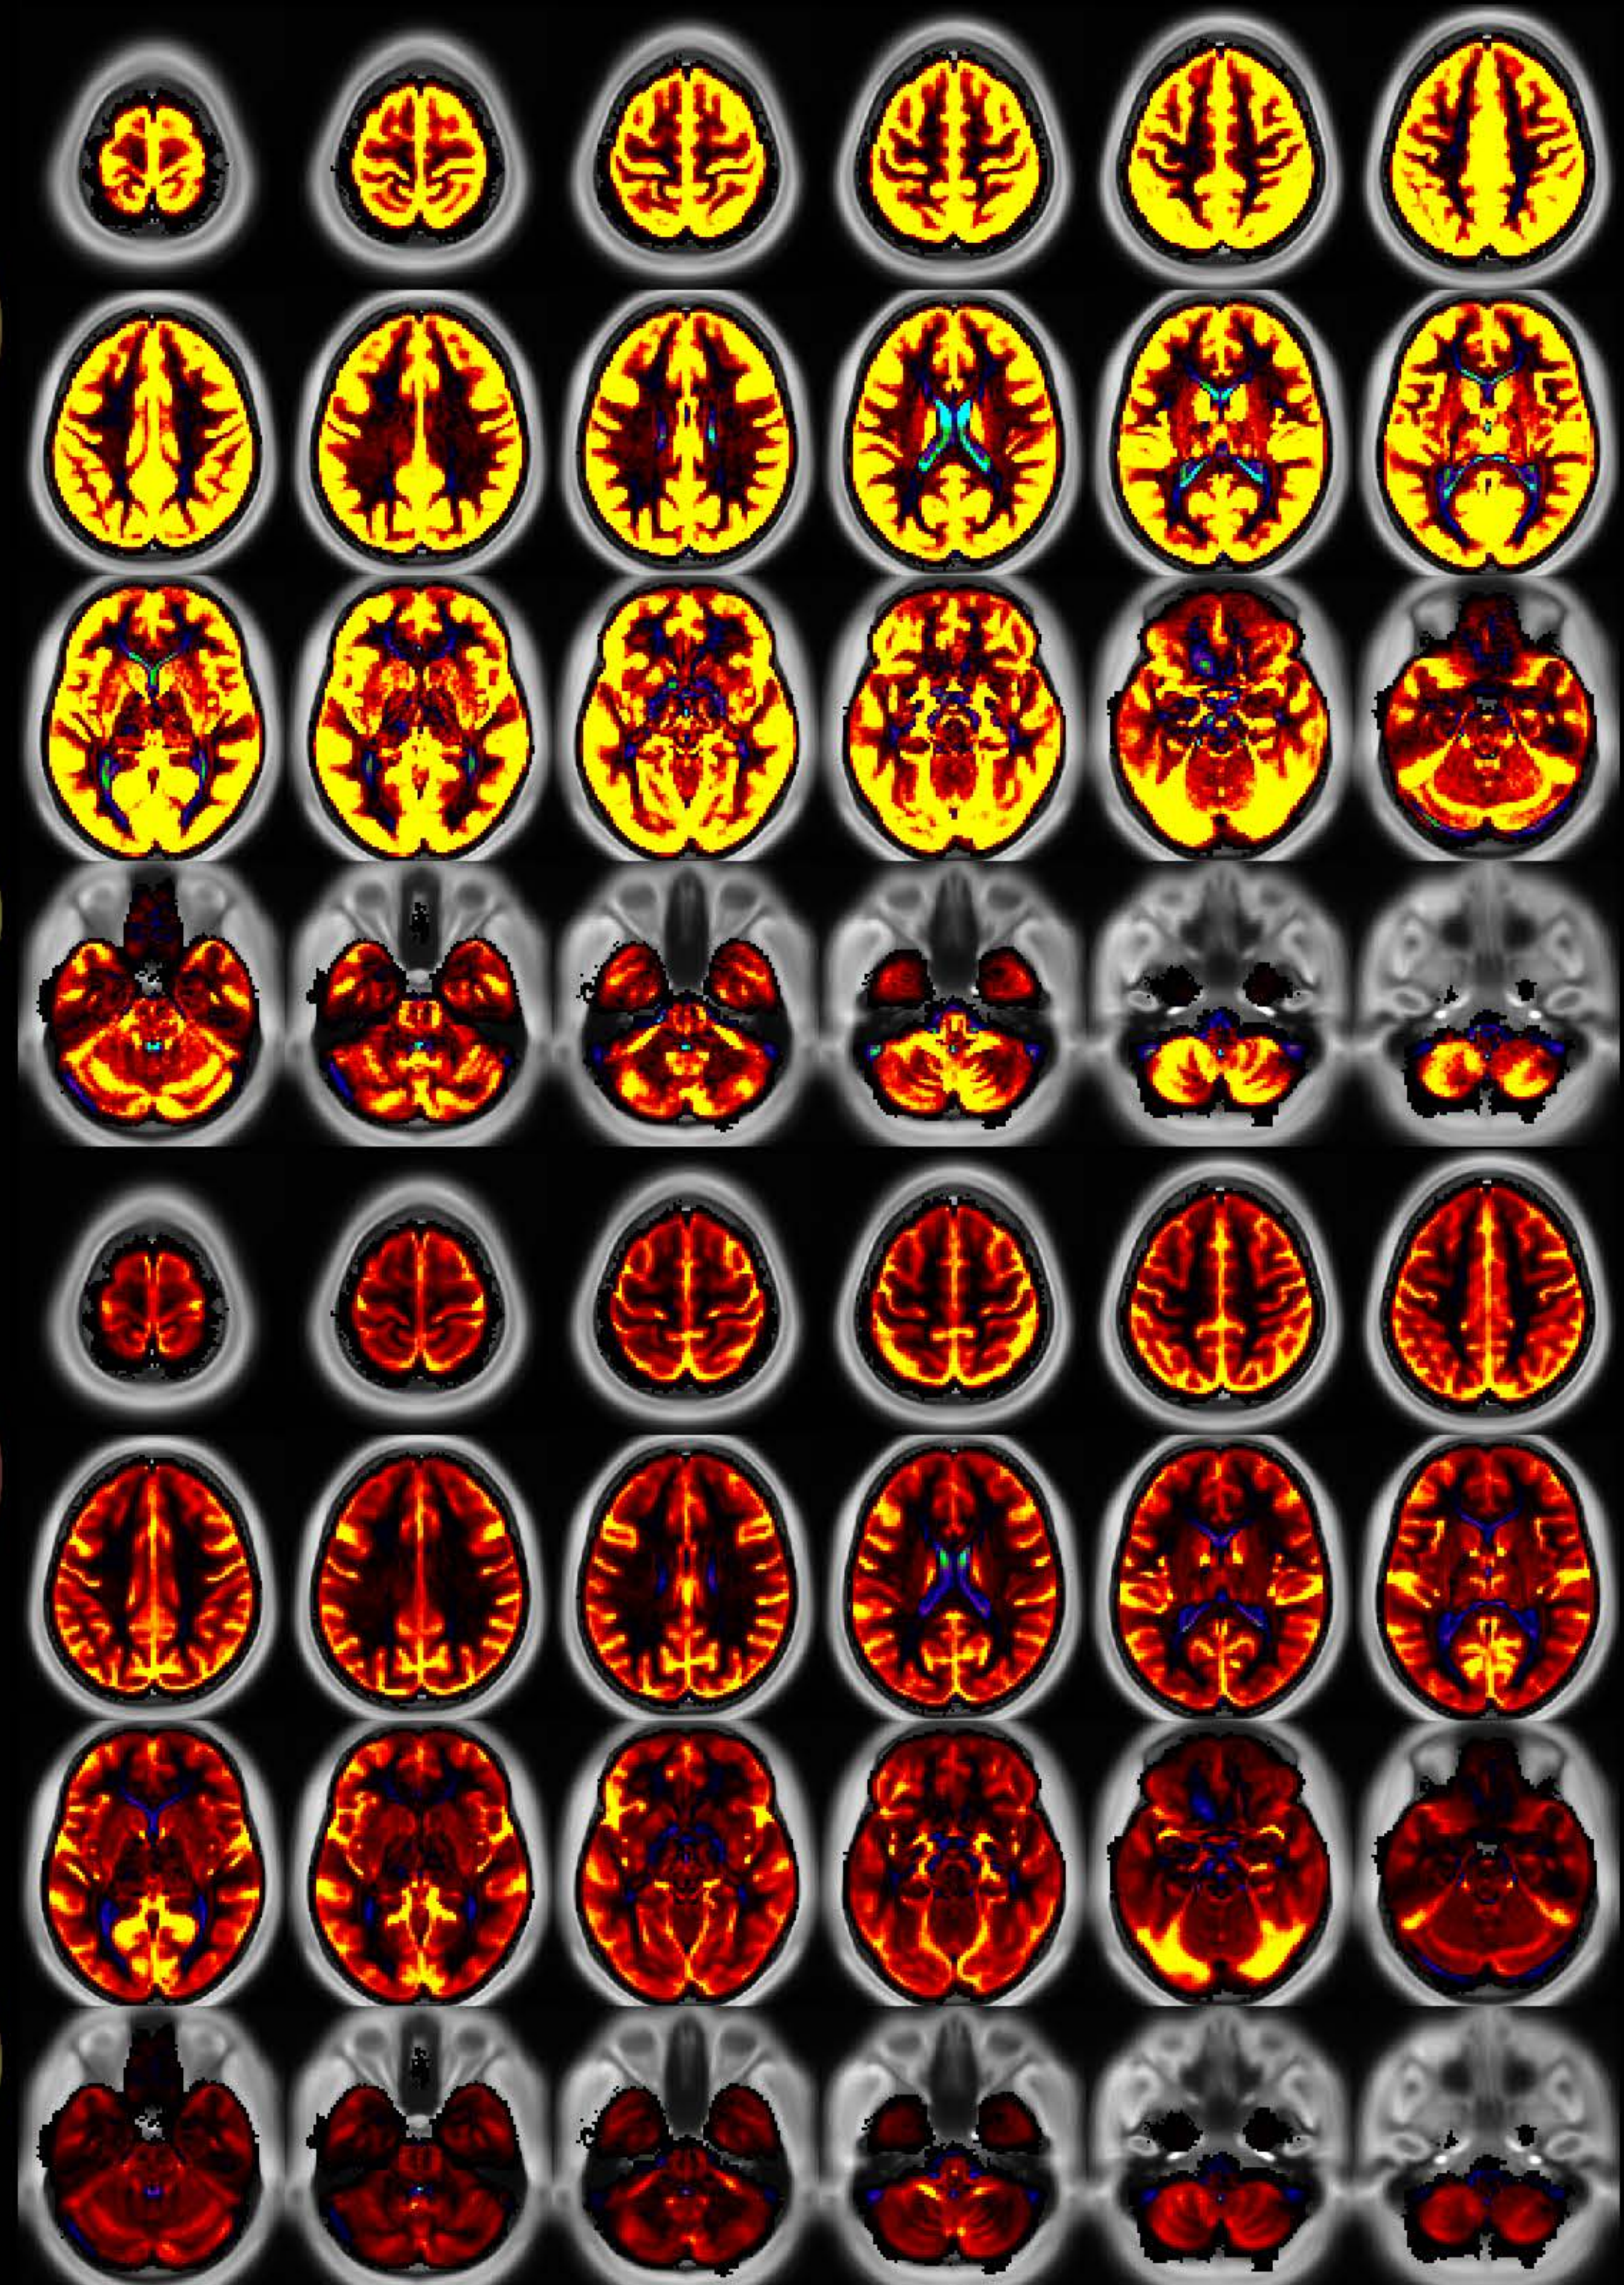

Seconds

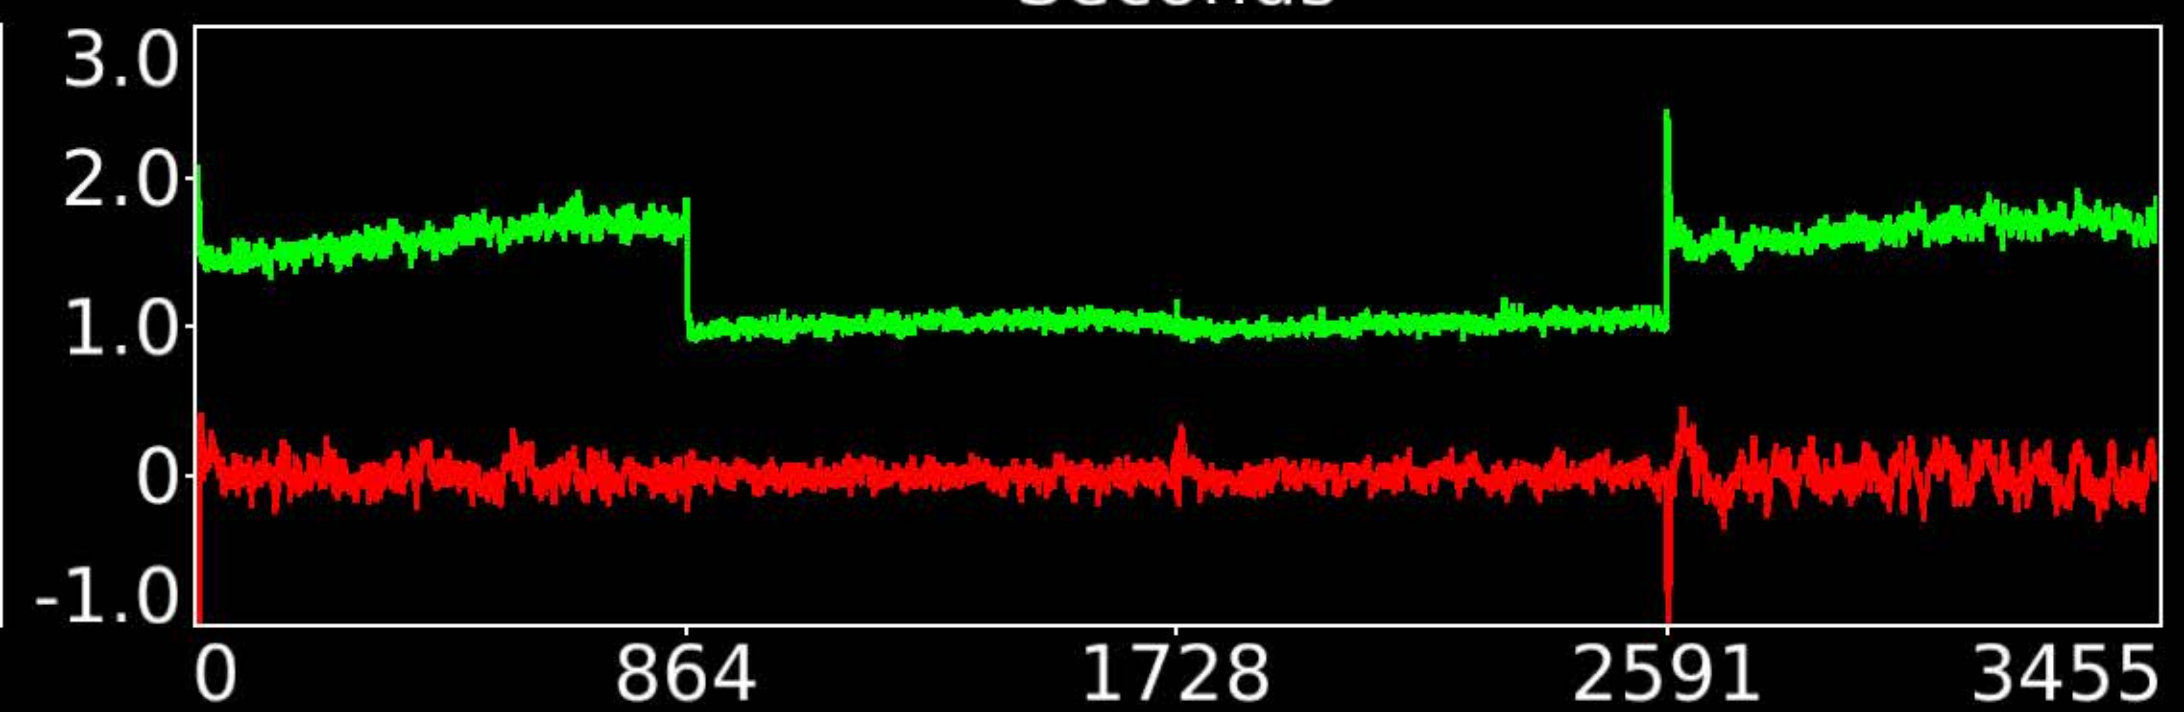

|                         |                            |                                  |  |
|-------------------------|----------------------------|----------------------------------|--|
| Number & Class: 6 Noise |                            | Name: Global Physiological Noise |  |
| RVT Correlated: Yes     | DVARS Dip Associated: Yes  | Cross-Subject Variable: No       |  |
| Single Subject: No      | % Variance Explained: 2.86 | Globality Index: 5.67            |  |
| Task Component: 1       | Taskr Component: 1         | Sleep Noted: No                  |  |

Rationale: Globally positive component matching hypothesized pattern for physiological artifact; does not clearly follow known areal boundaries



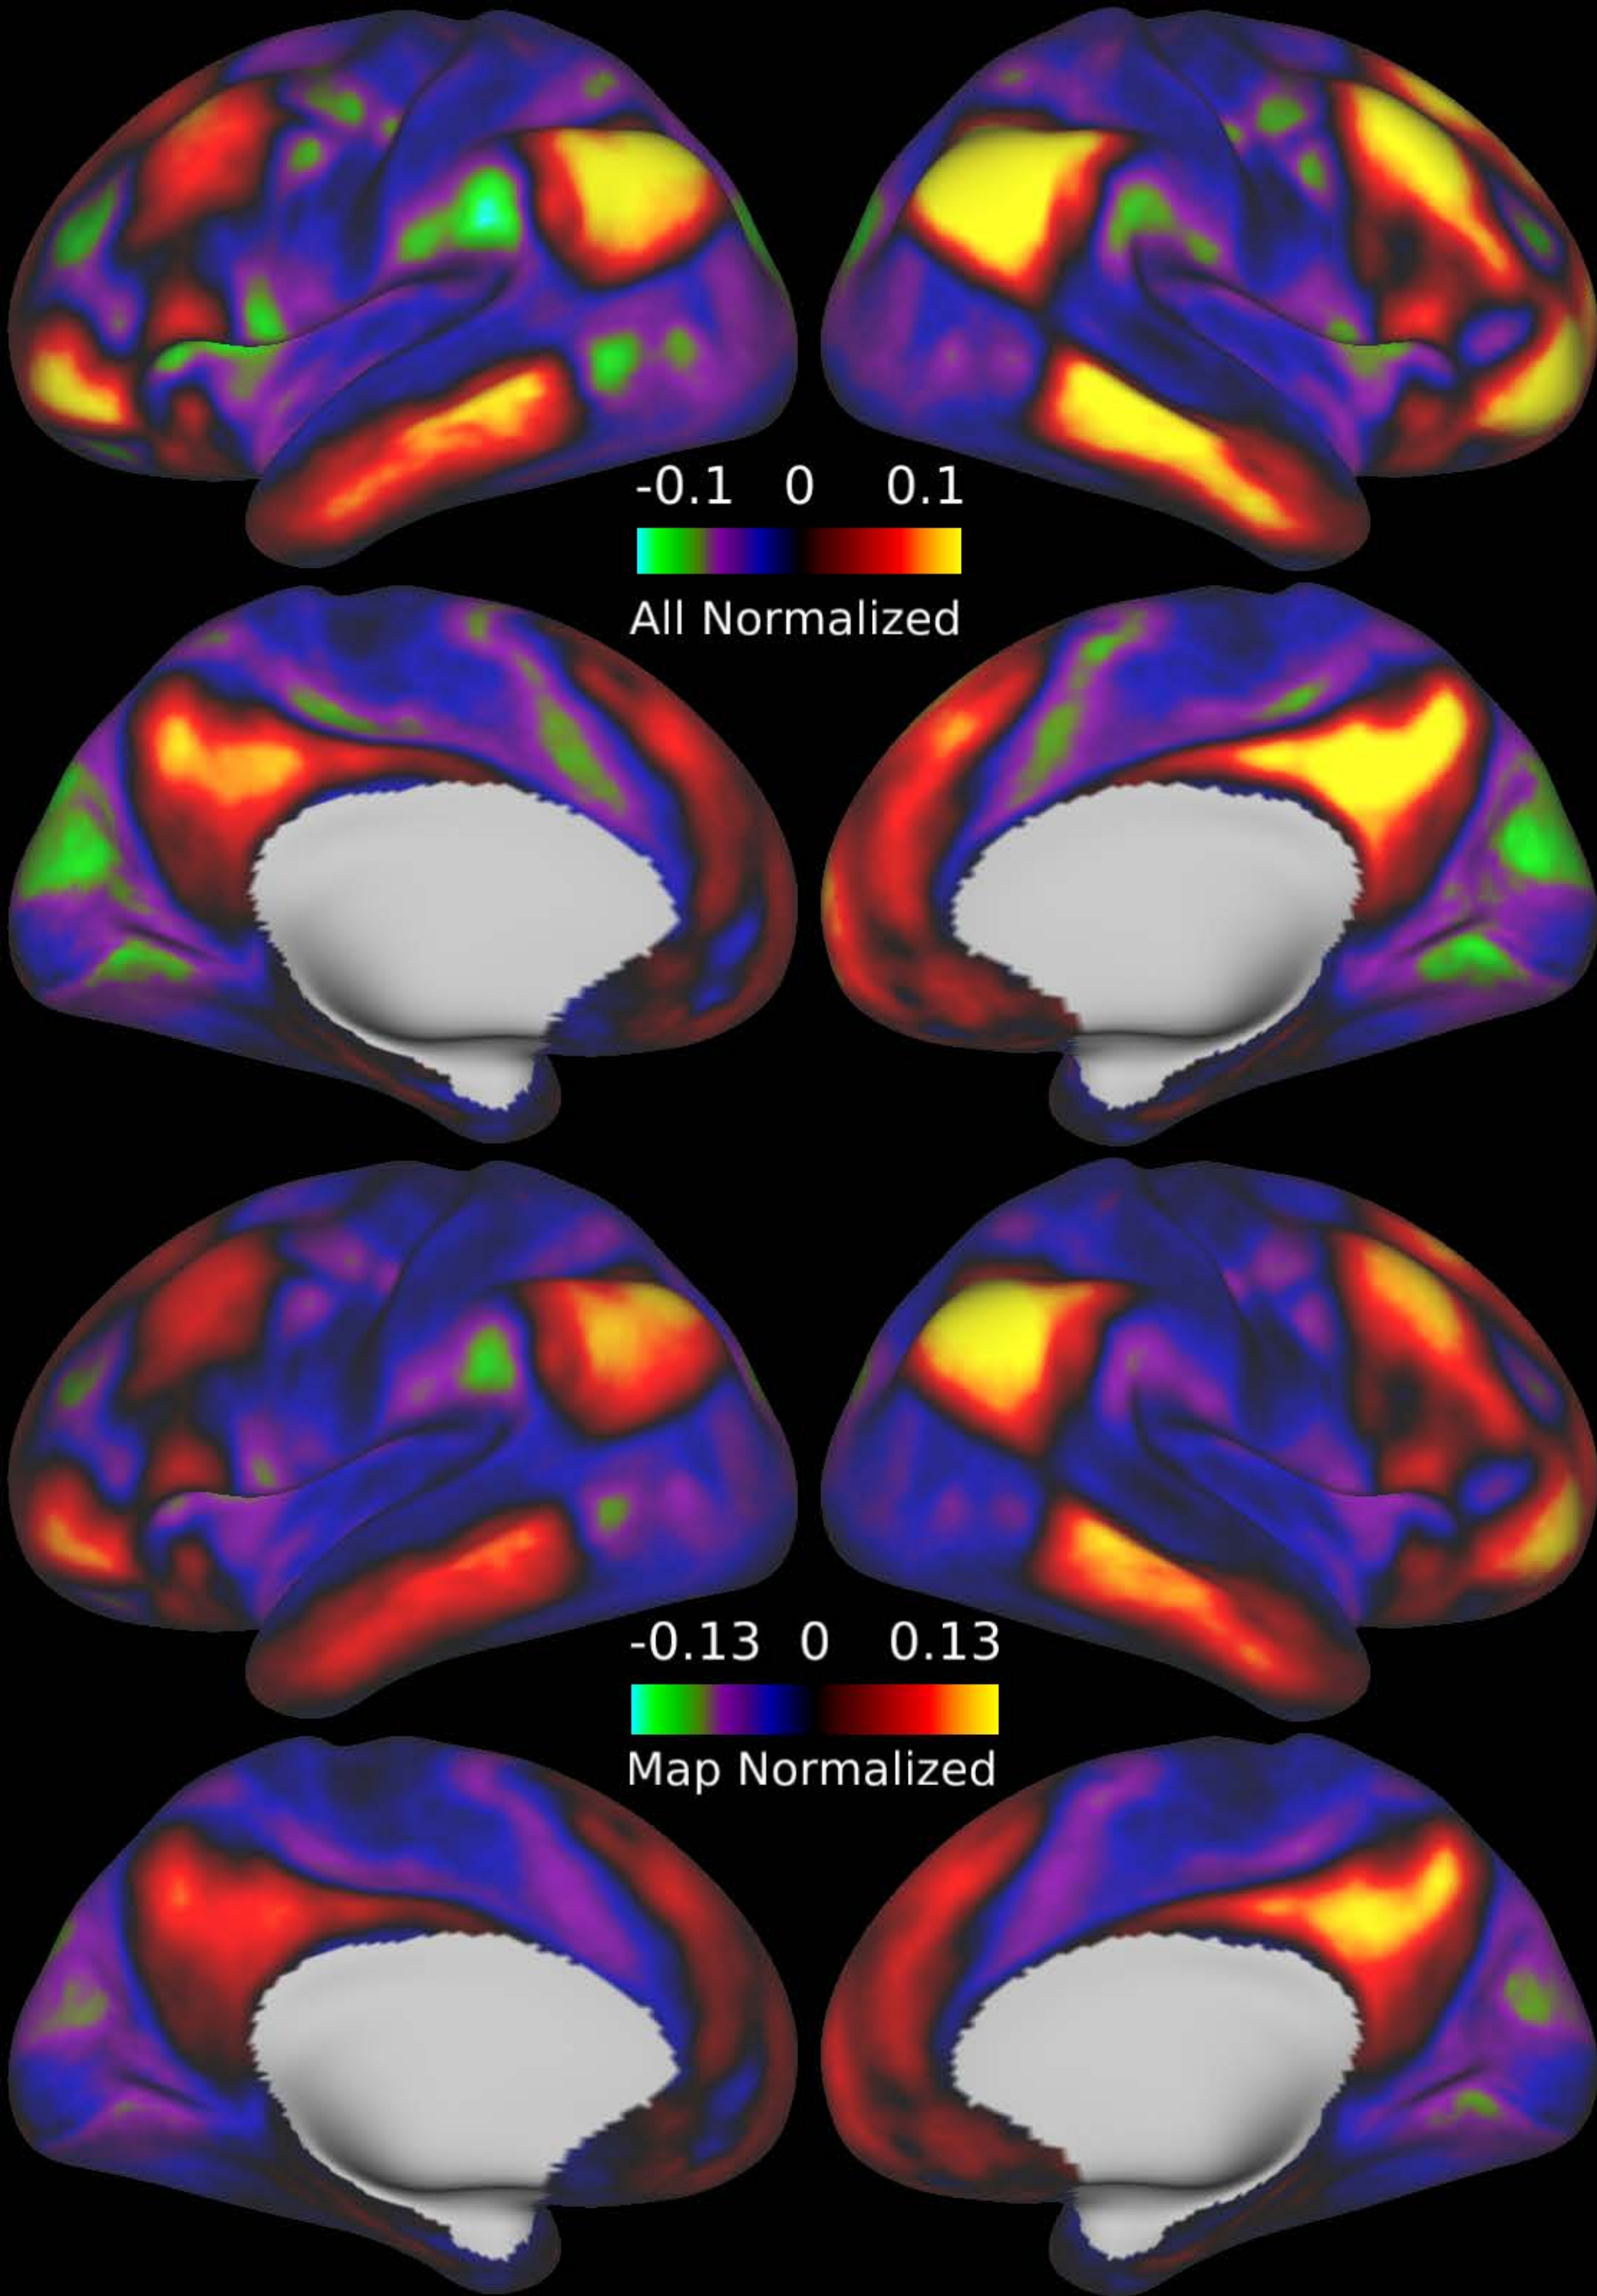

Hertz

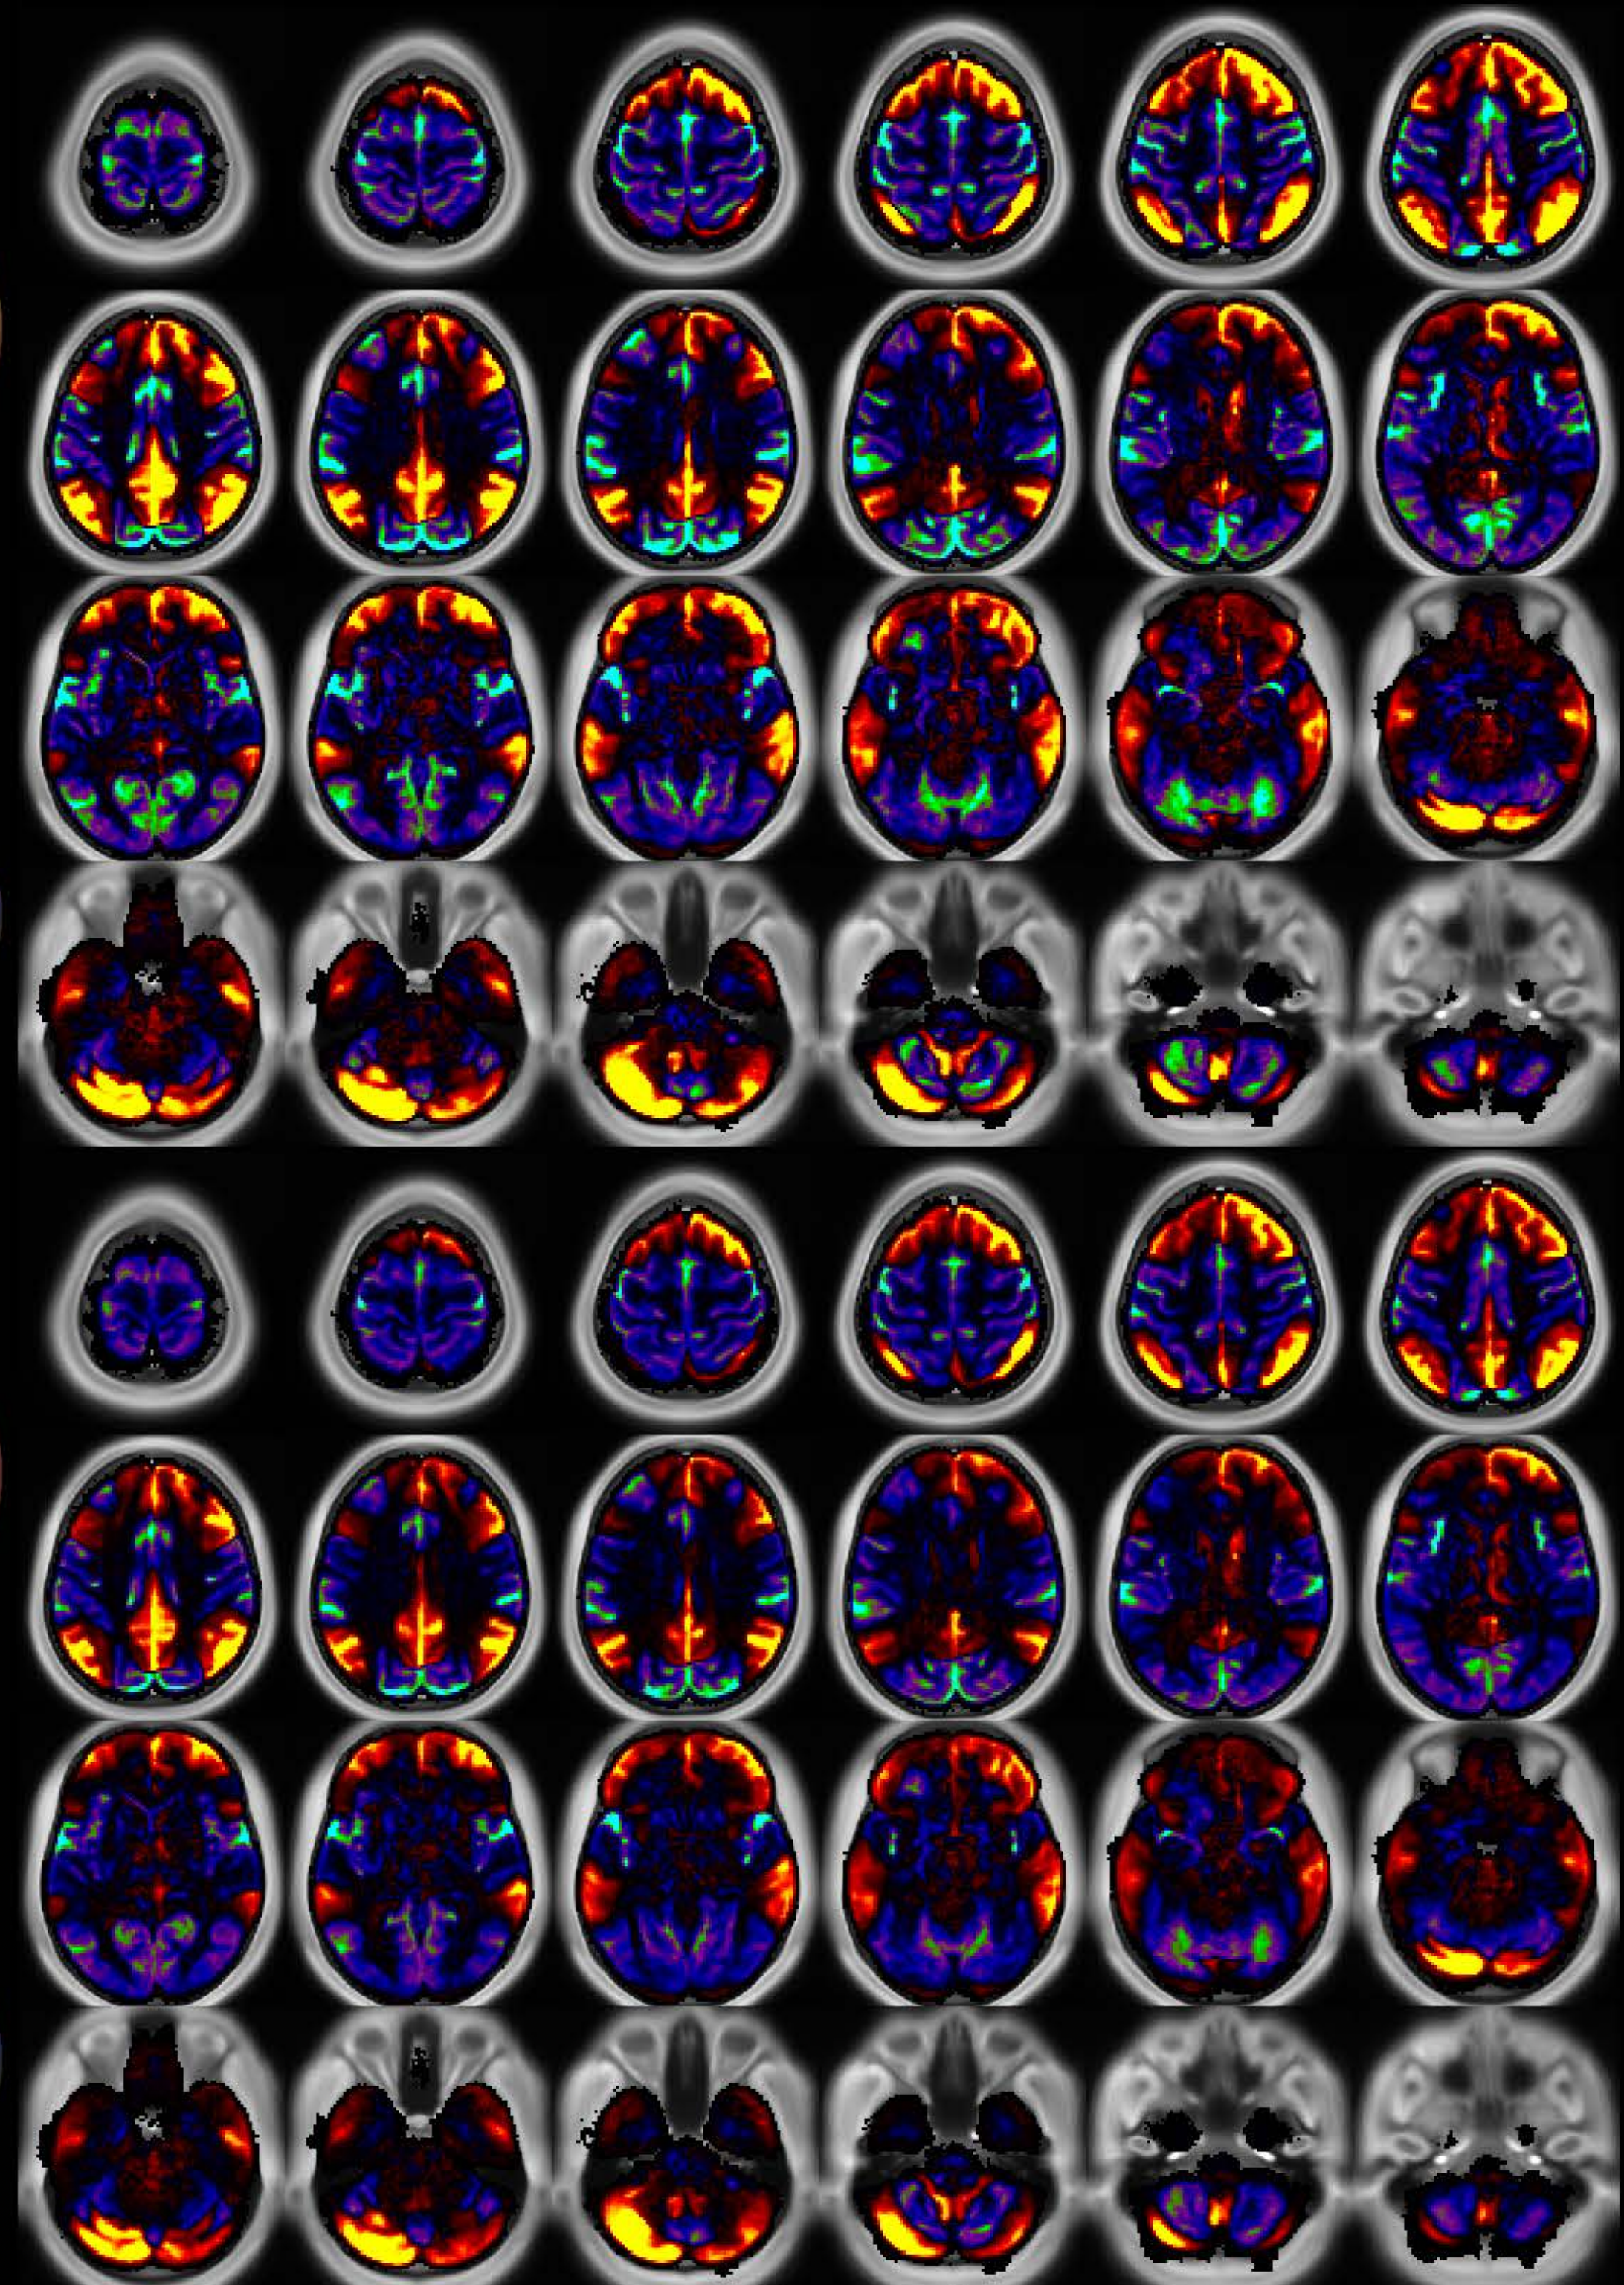

Seconds

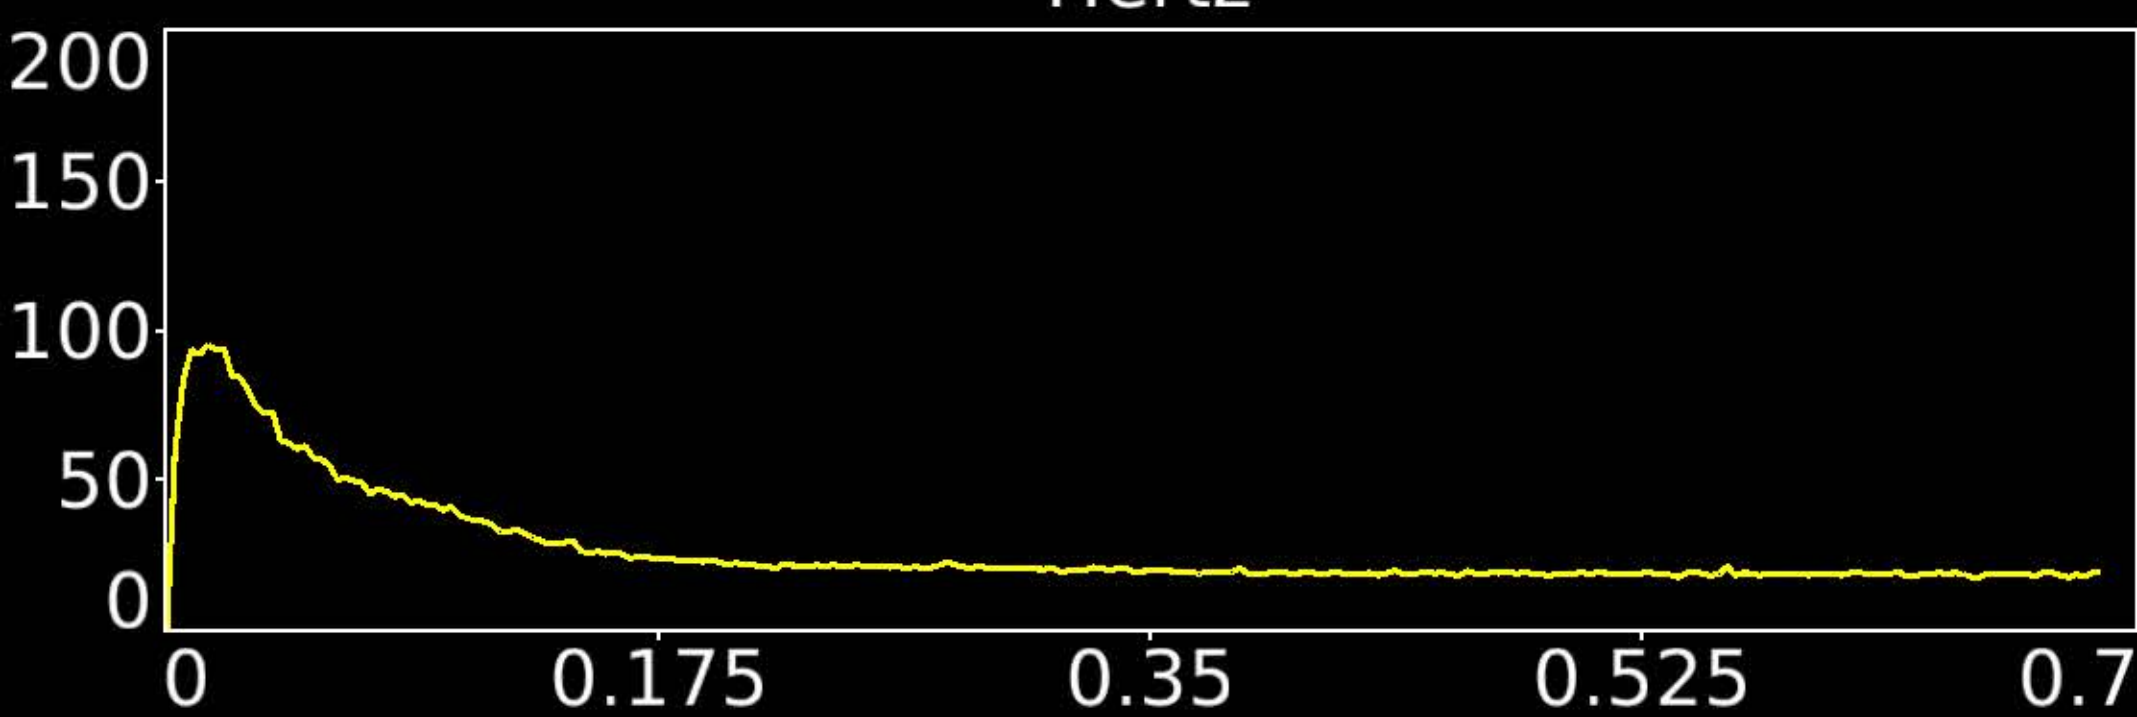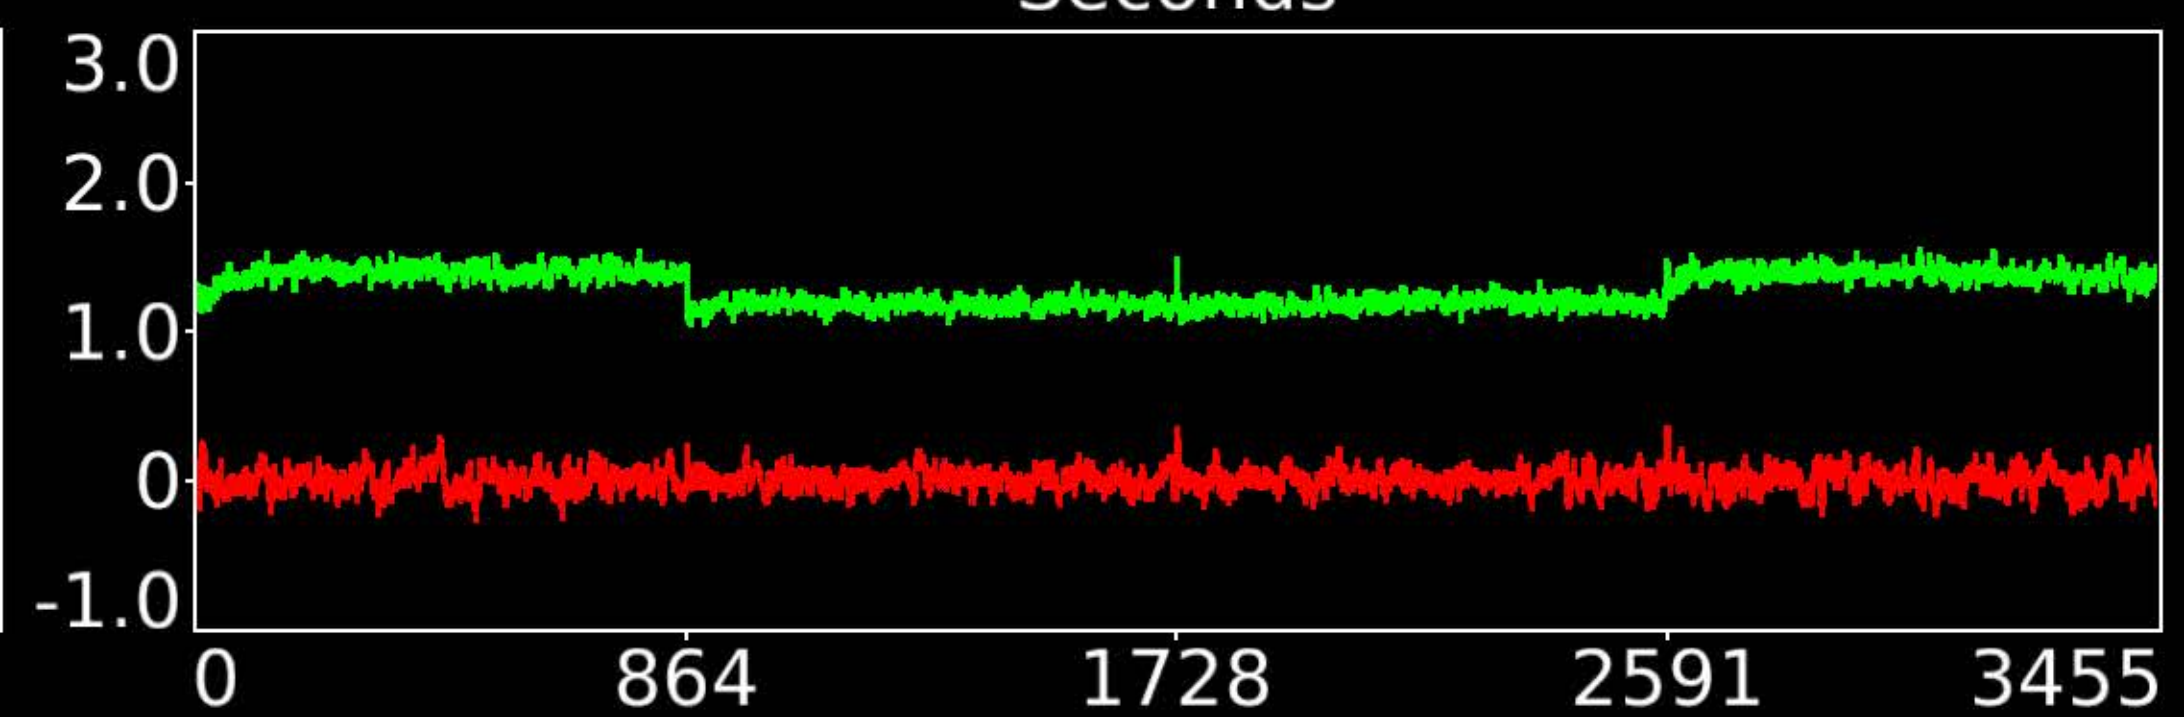

|                          |                                         |                            |
|--------------------------|-----------------------------------------|----------------------------|
| Number & Class: 7 Signal | Name: Default Mode R Primary Cerebellar |                            |
| RVT Correlated: No       | DVARS Dip Associated: No                | Cross-Subject Variable: No |
| Single Subject: No       | % Variance Explained: 2.54              | Globality Index: 0.74      |
| Task Component: No       | Taskr Component: No                     | Sleep Noted: No            |

Rationale: Spatial map includes positive and negative patches that respect known RSNs (e.g. Default Mode Network)



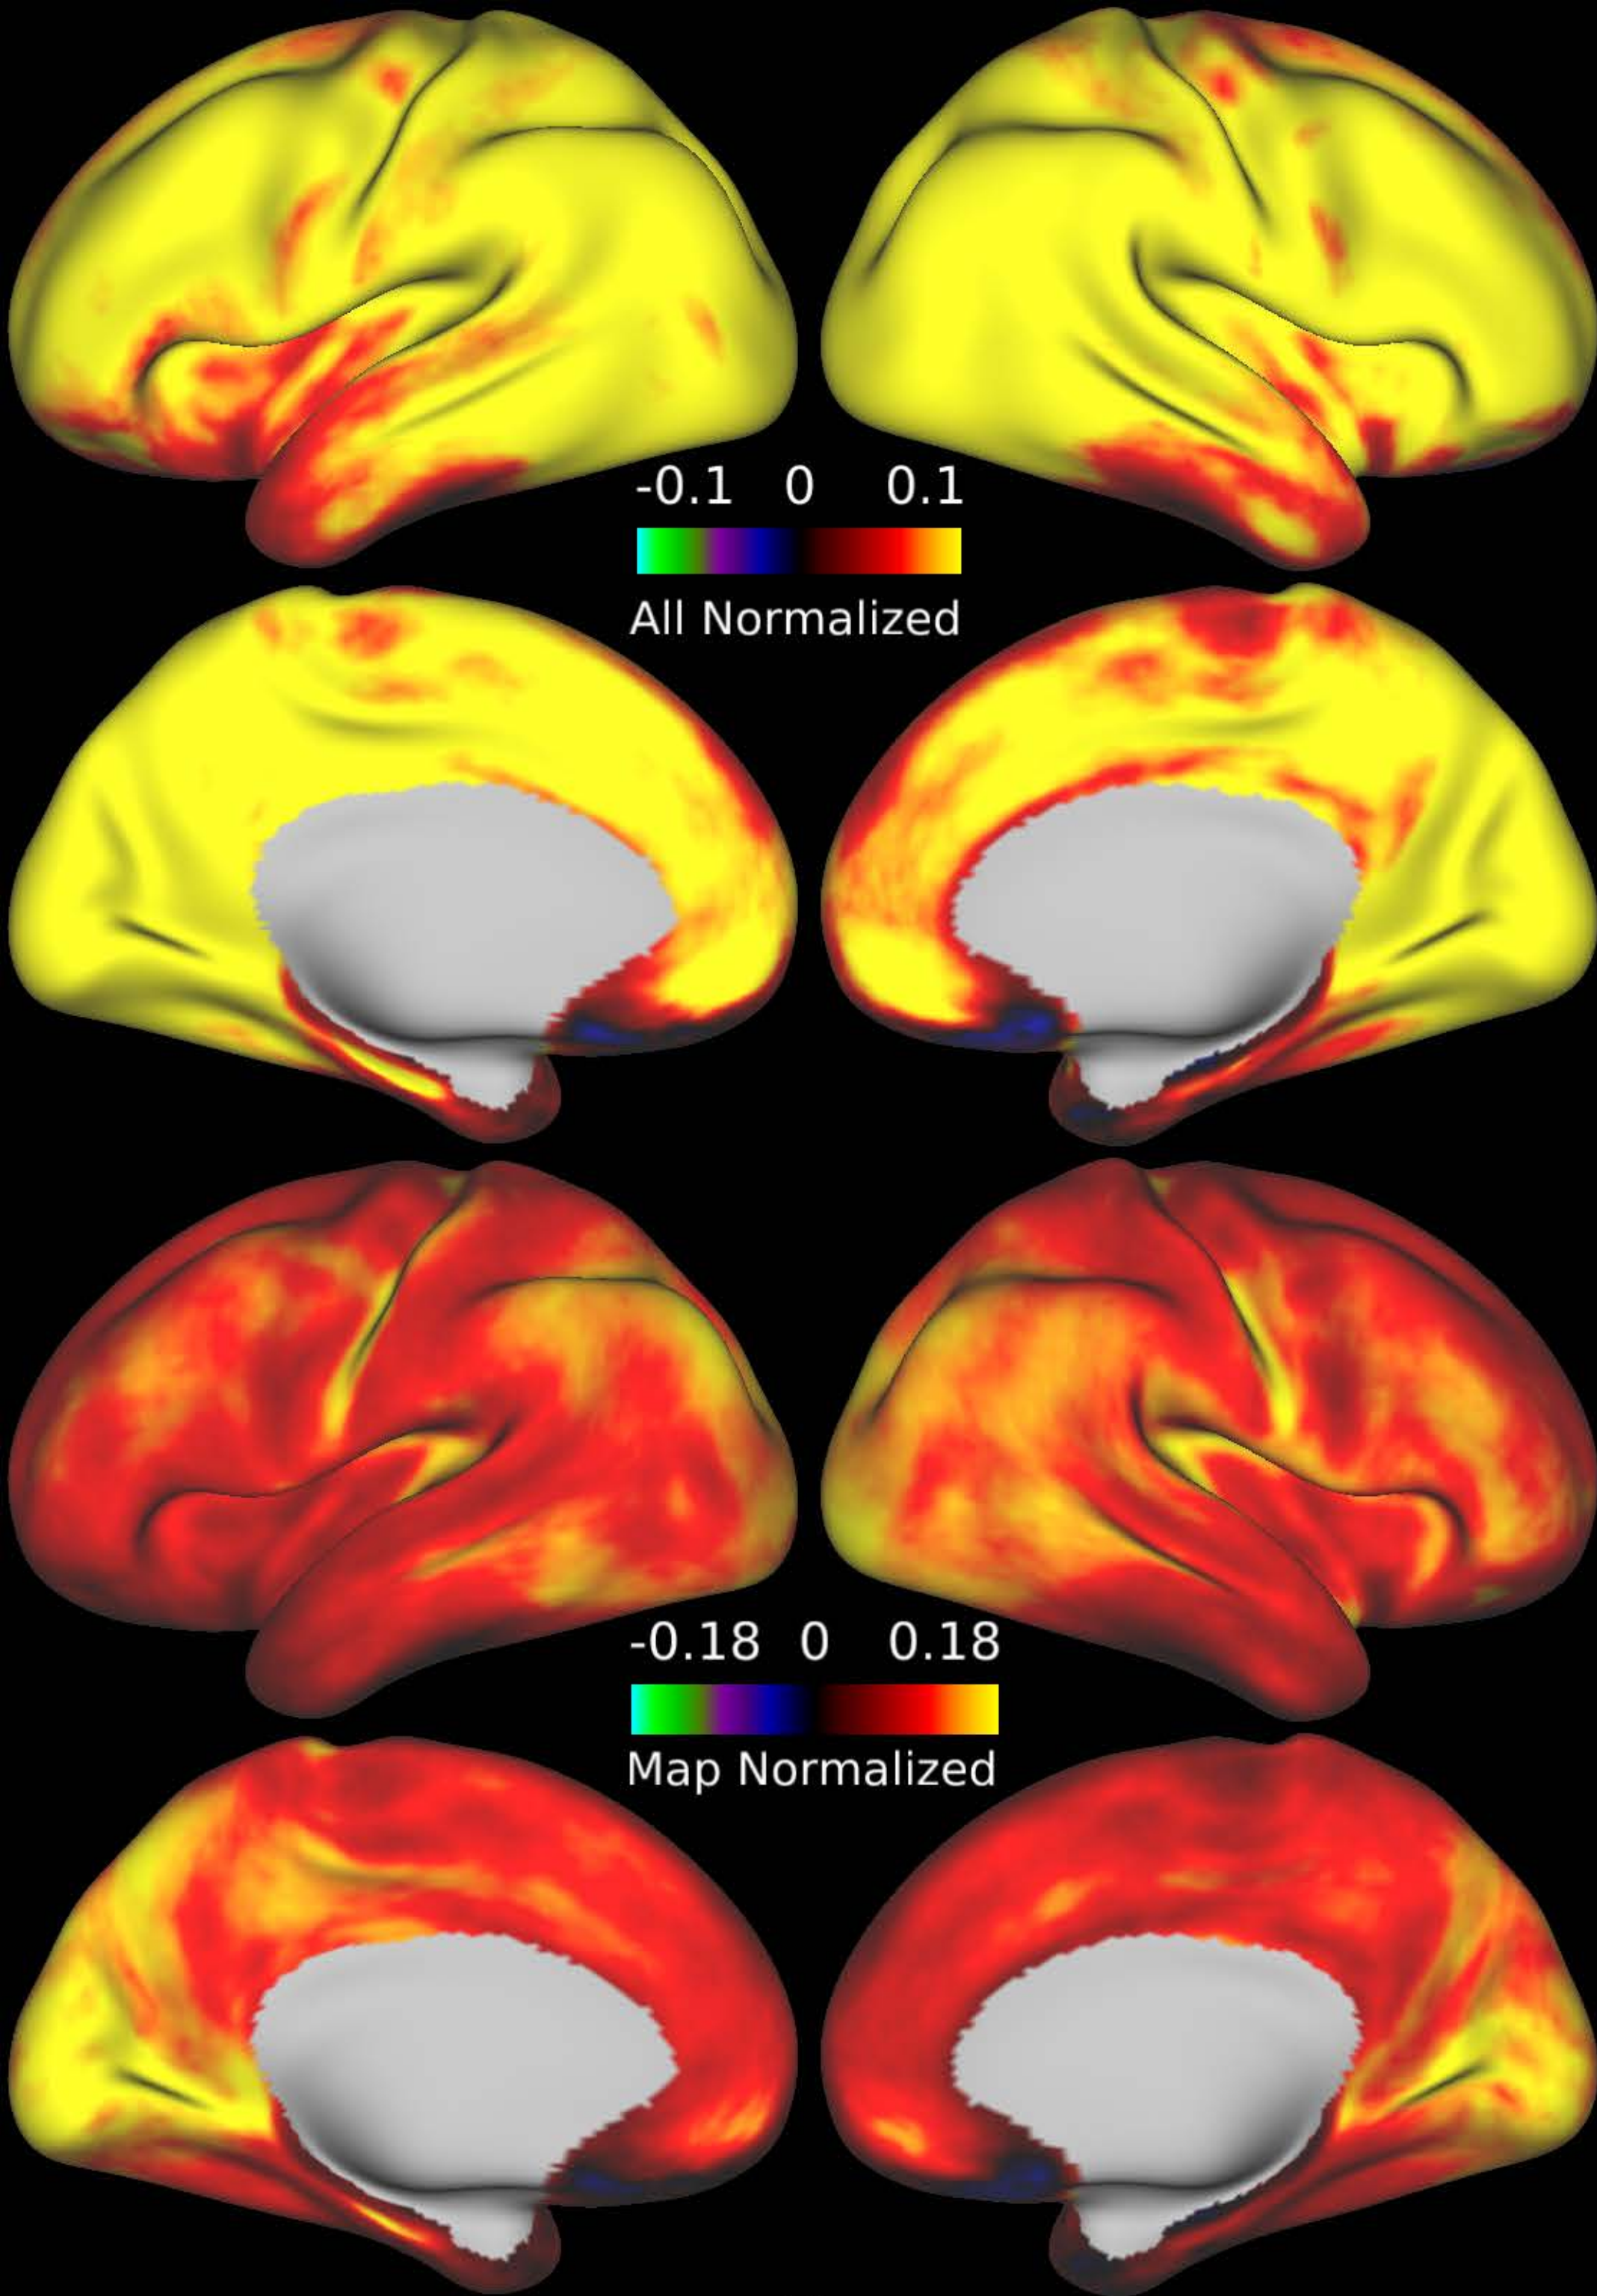

Hertz

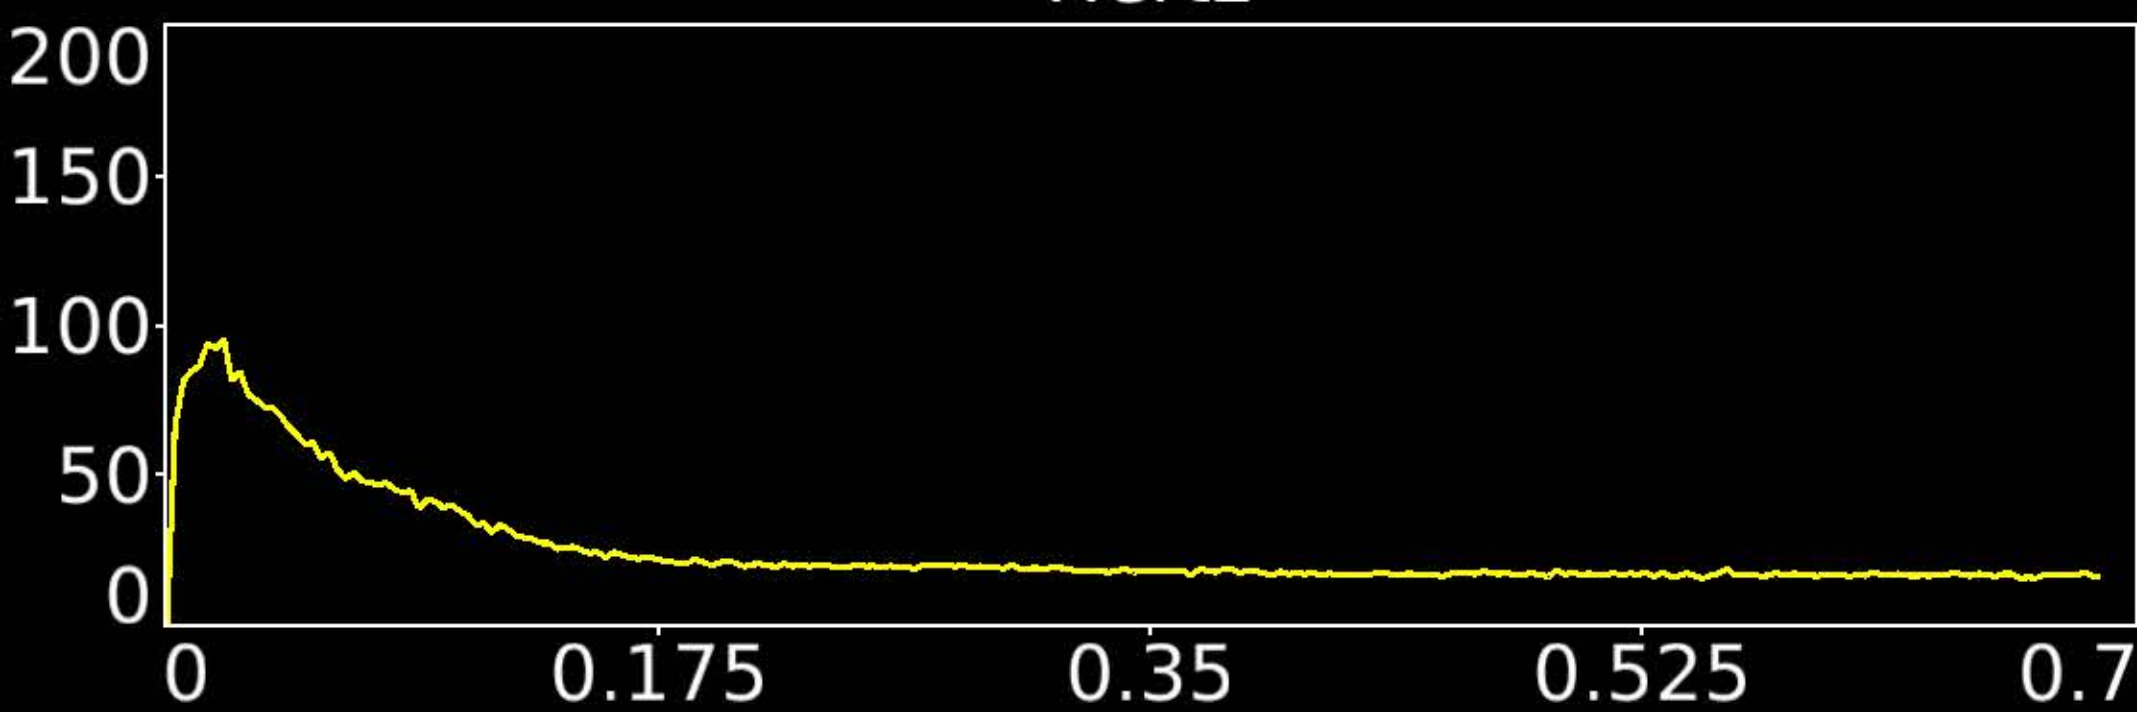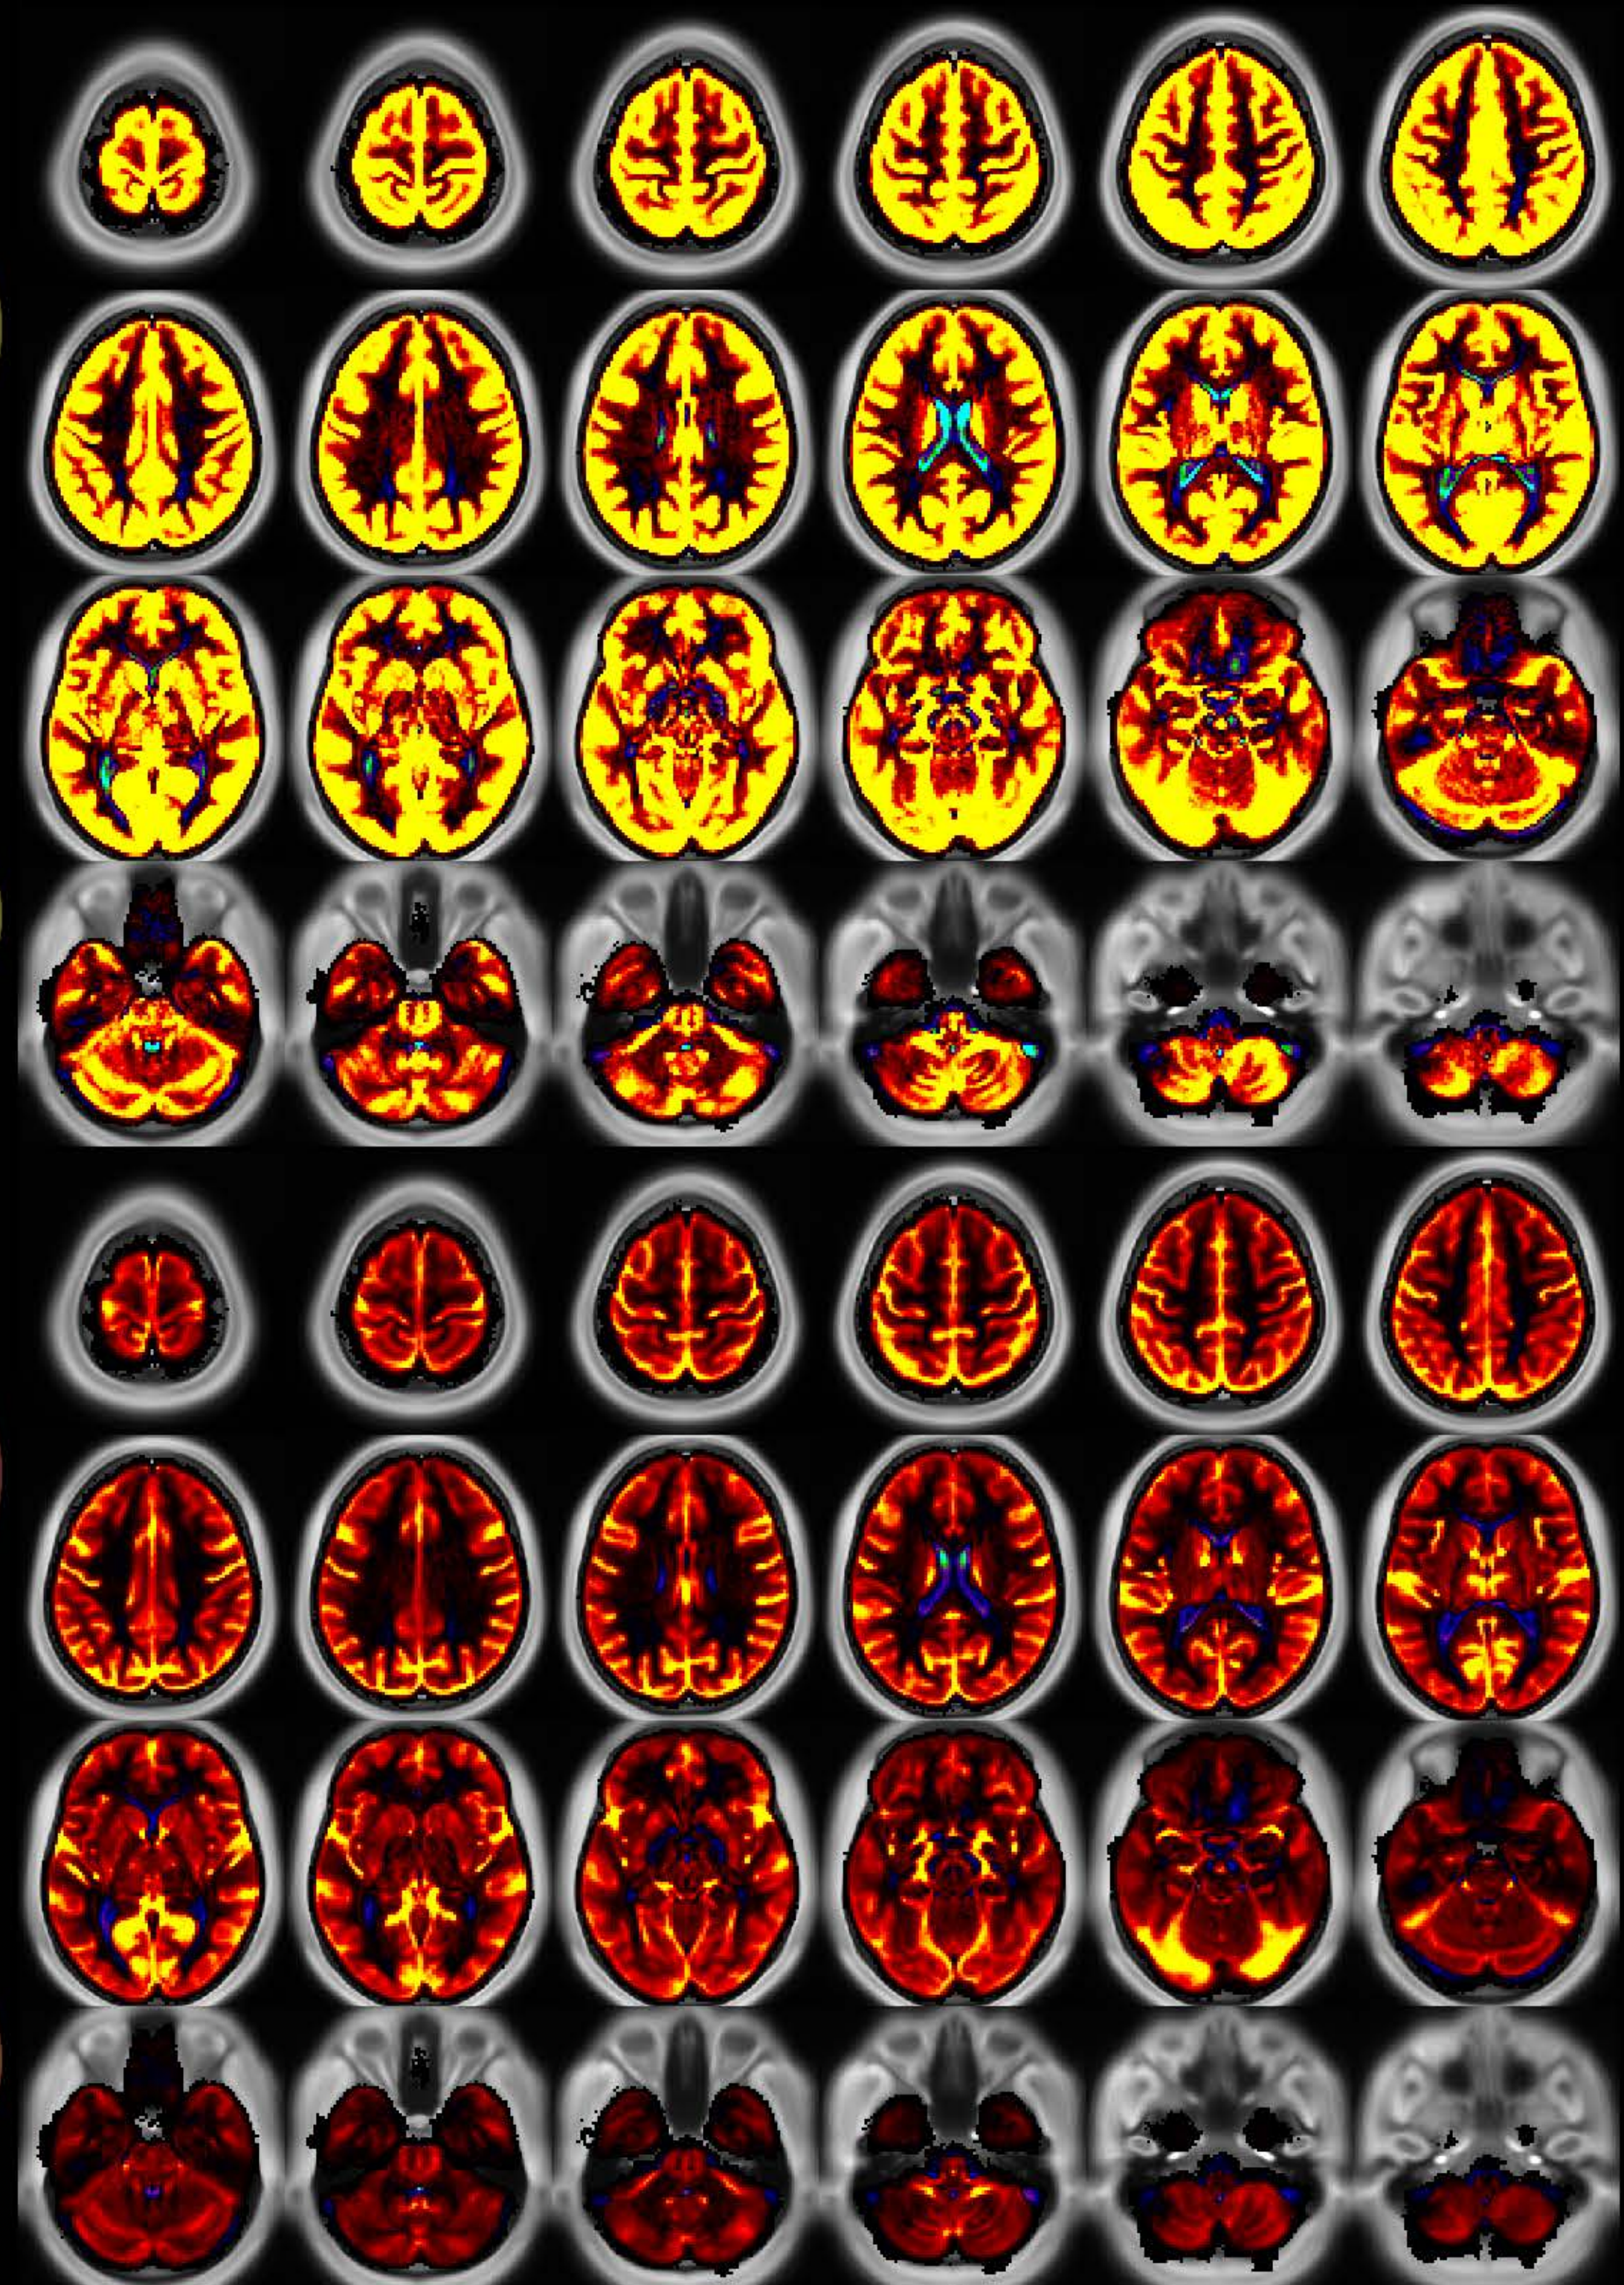

Seconds

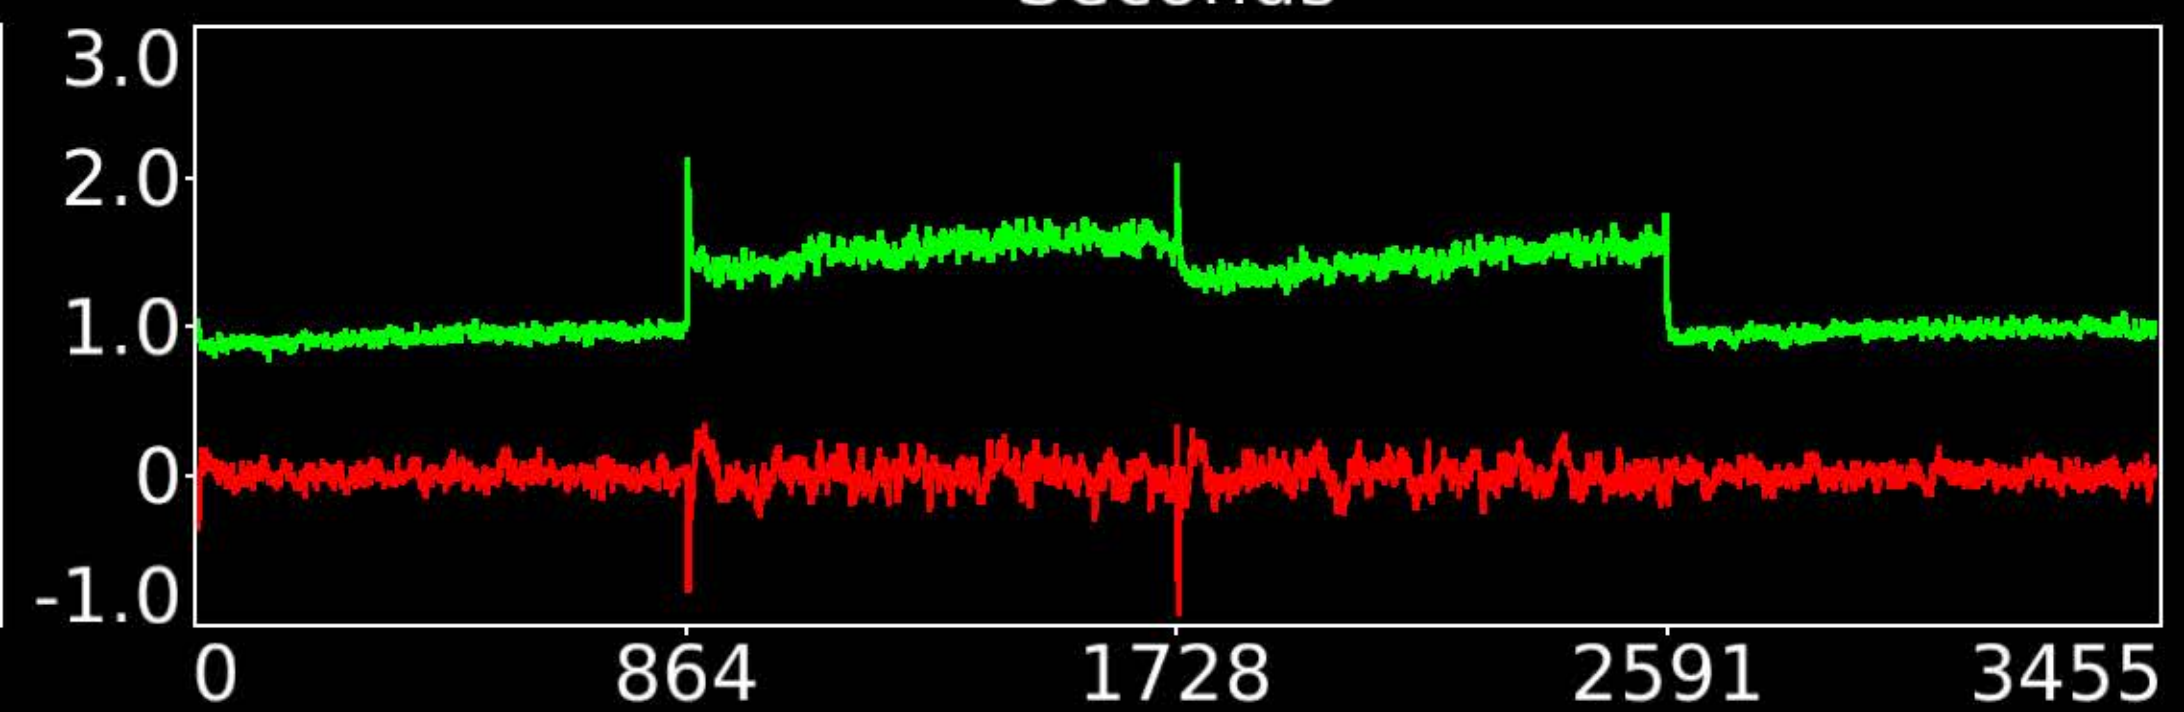

Number & Class: 8 Noise

Name: Global Physiological Noise

RVT Correlated: Yes

DVARS Dip Associated: Yes

Cross-Subject Variable: No

Single Subject: No

% Variance Explained: 2.51

Globality Index: 5.94

Task Component: 1

Taskr Component: 1

Sleep Noted: No

Rationale: Globally positive component matching hypothesized pattern for physiological artifact; does not clearly follow known areal boundaries



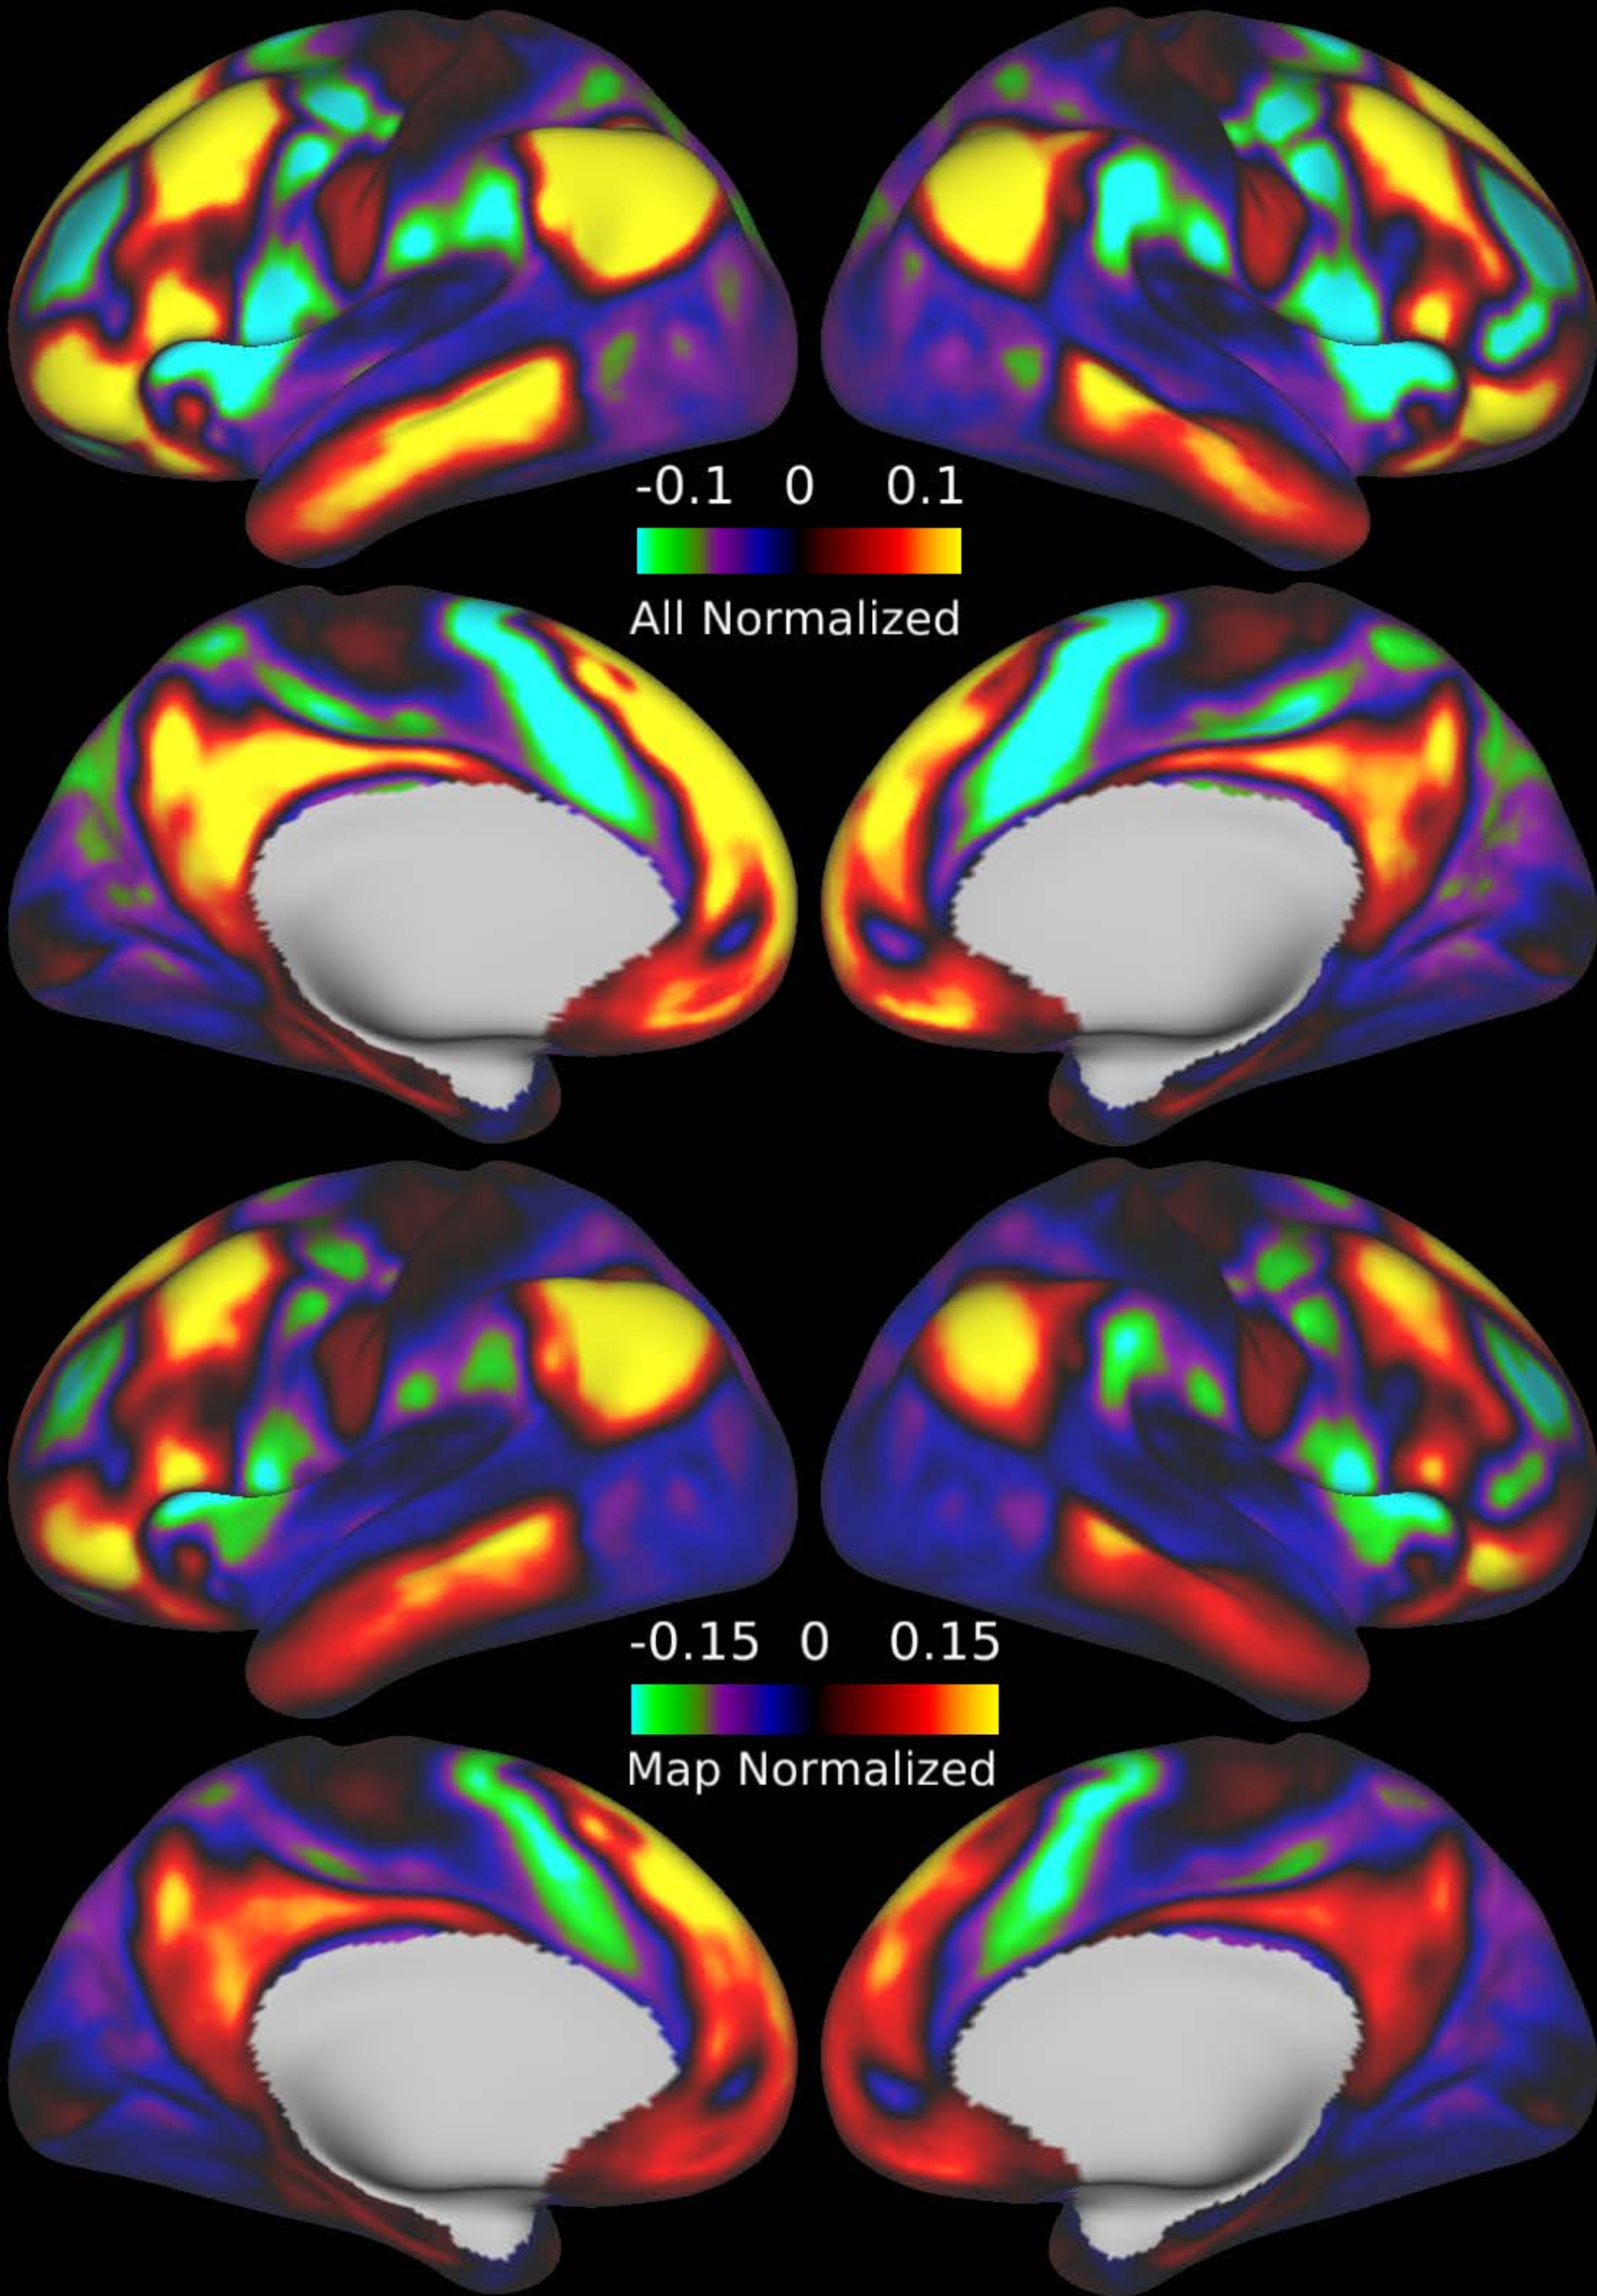

Hertz

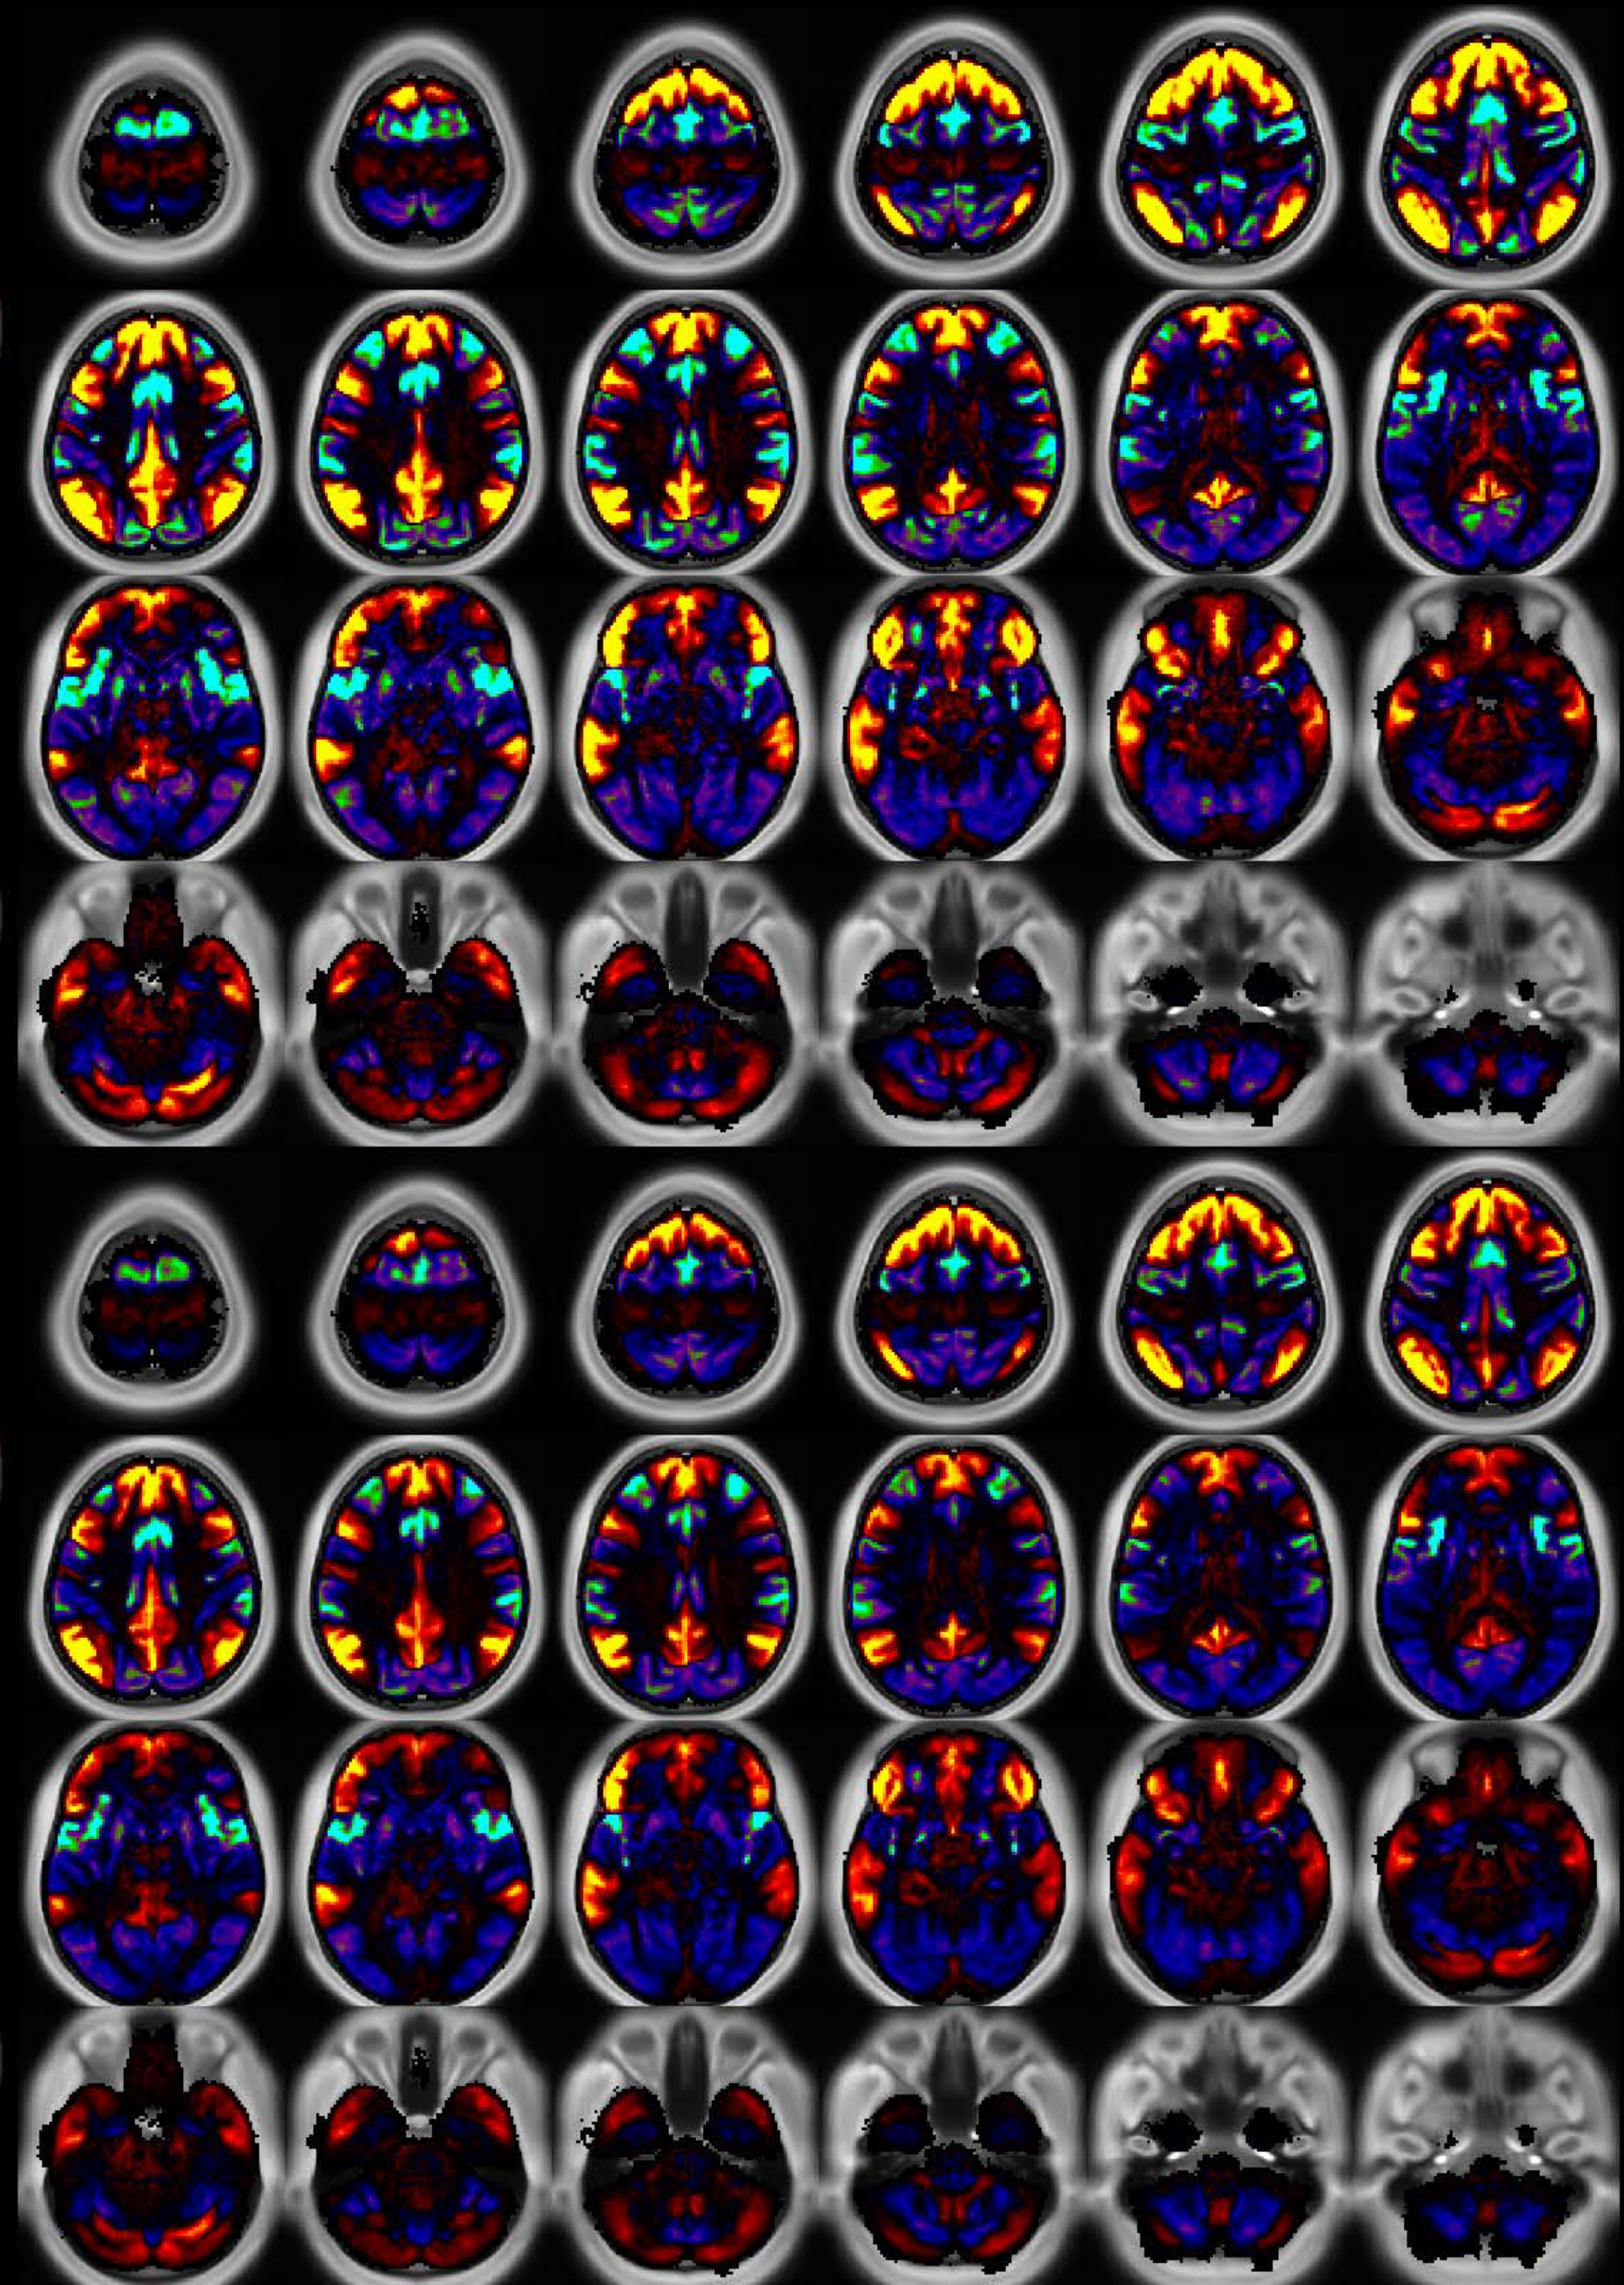

Seconds

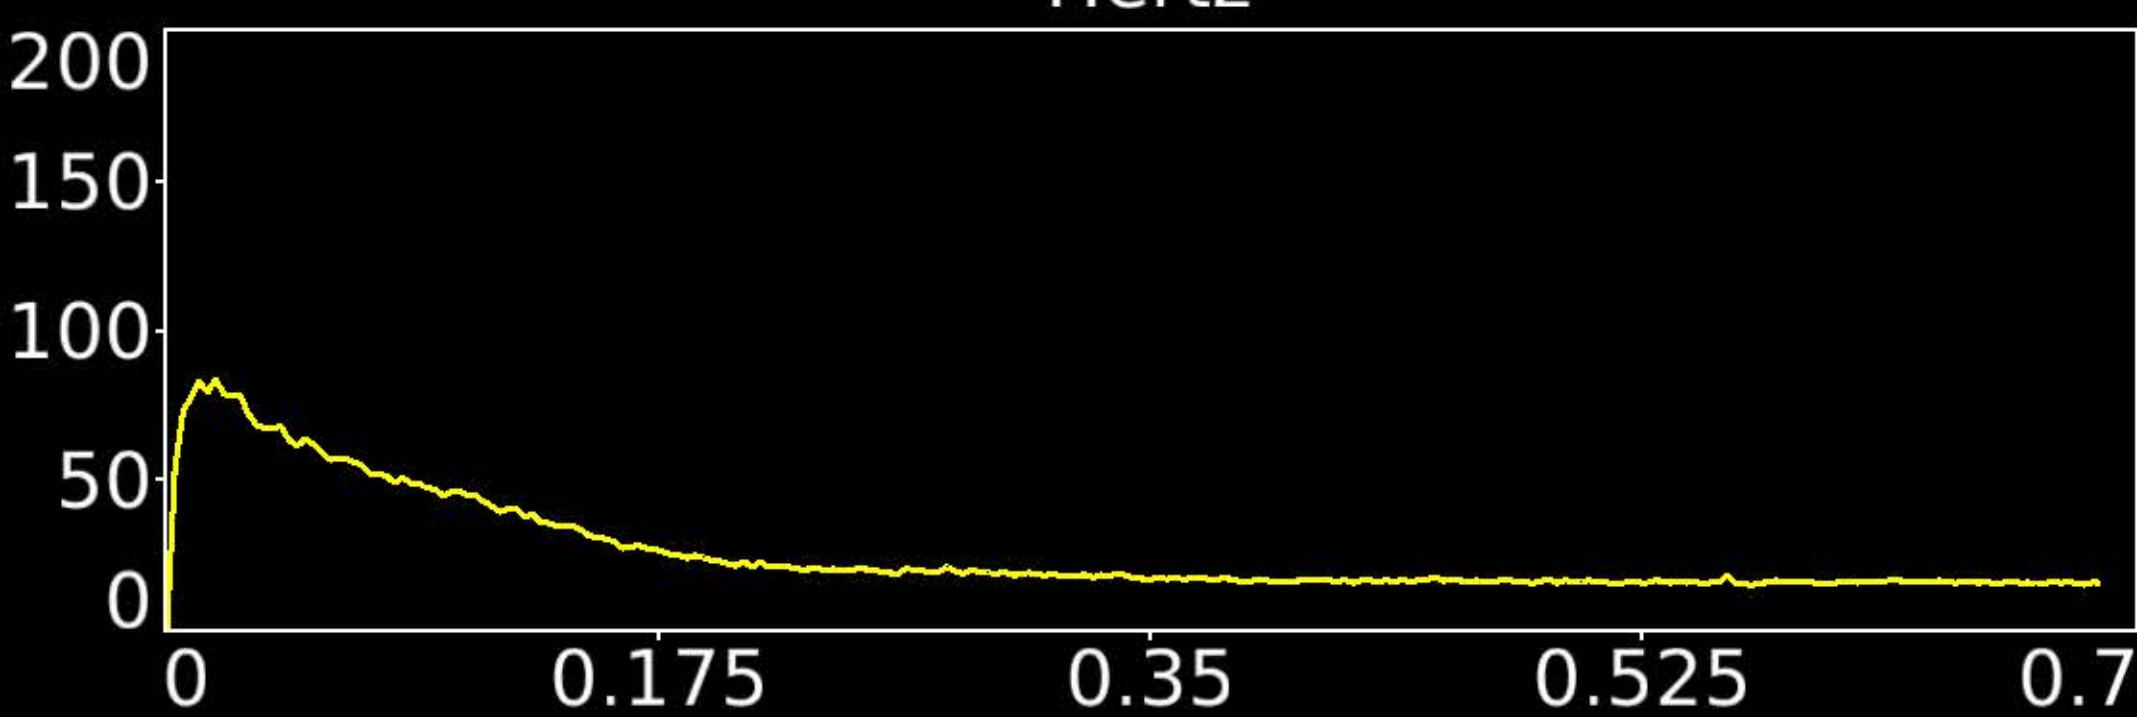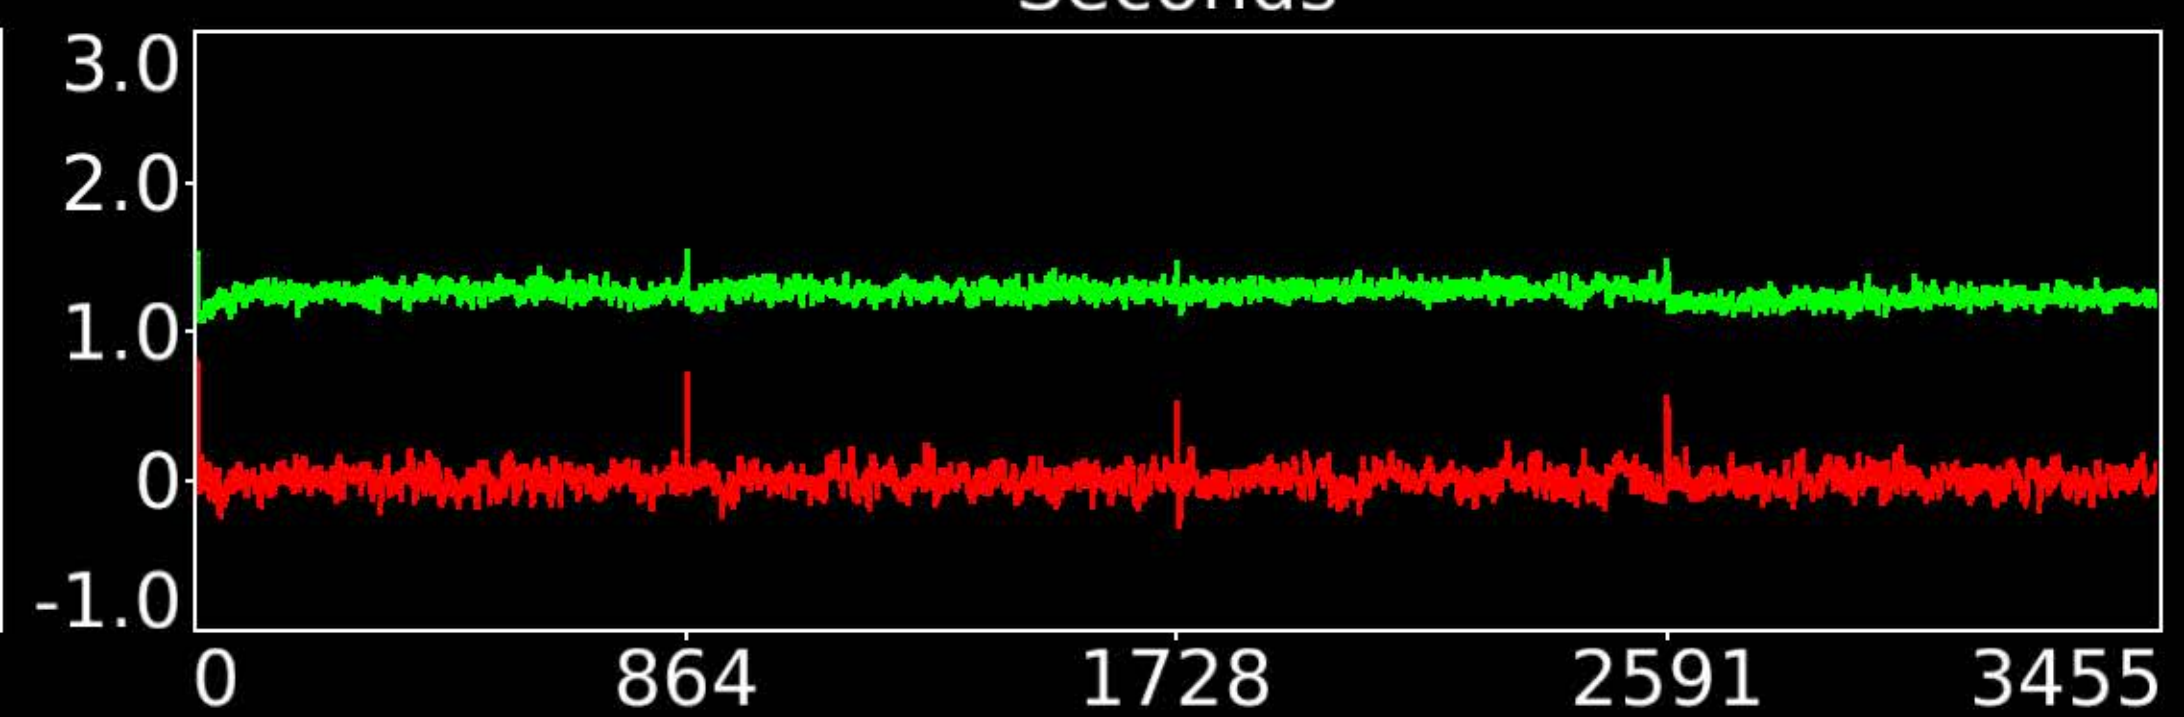

|                          |                            |                               |  |
|--------------------------|----------------------------|-------------------------------|--|
| Number & Class: 9 Signal |                            | Name: Subsidiary Default Mode |  |
| RVT Correlated: No       | DVARS Dip Associated: No   | Cross-Subject Variable: No    |  |
| Single Subject: No       | % Variance Explained: 2.44 | Globality Index: 0.43         |  |
| Task Component: -9       | Taskr Component: 8         | Sleep Noted: No               |  |

Rationale: Spatial map includes positive and negative patches that respect known RSNs (e.g. Default Mode Network)



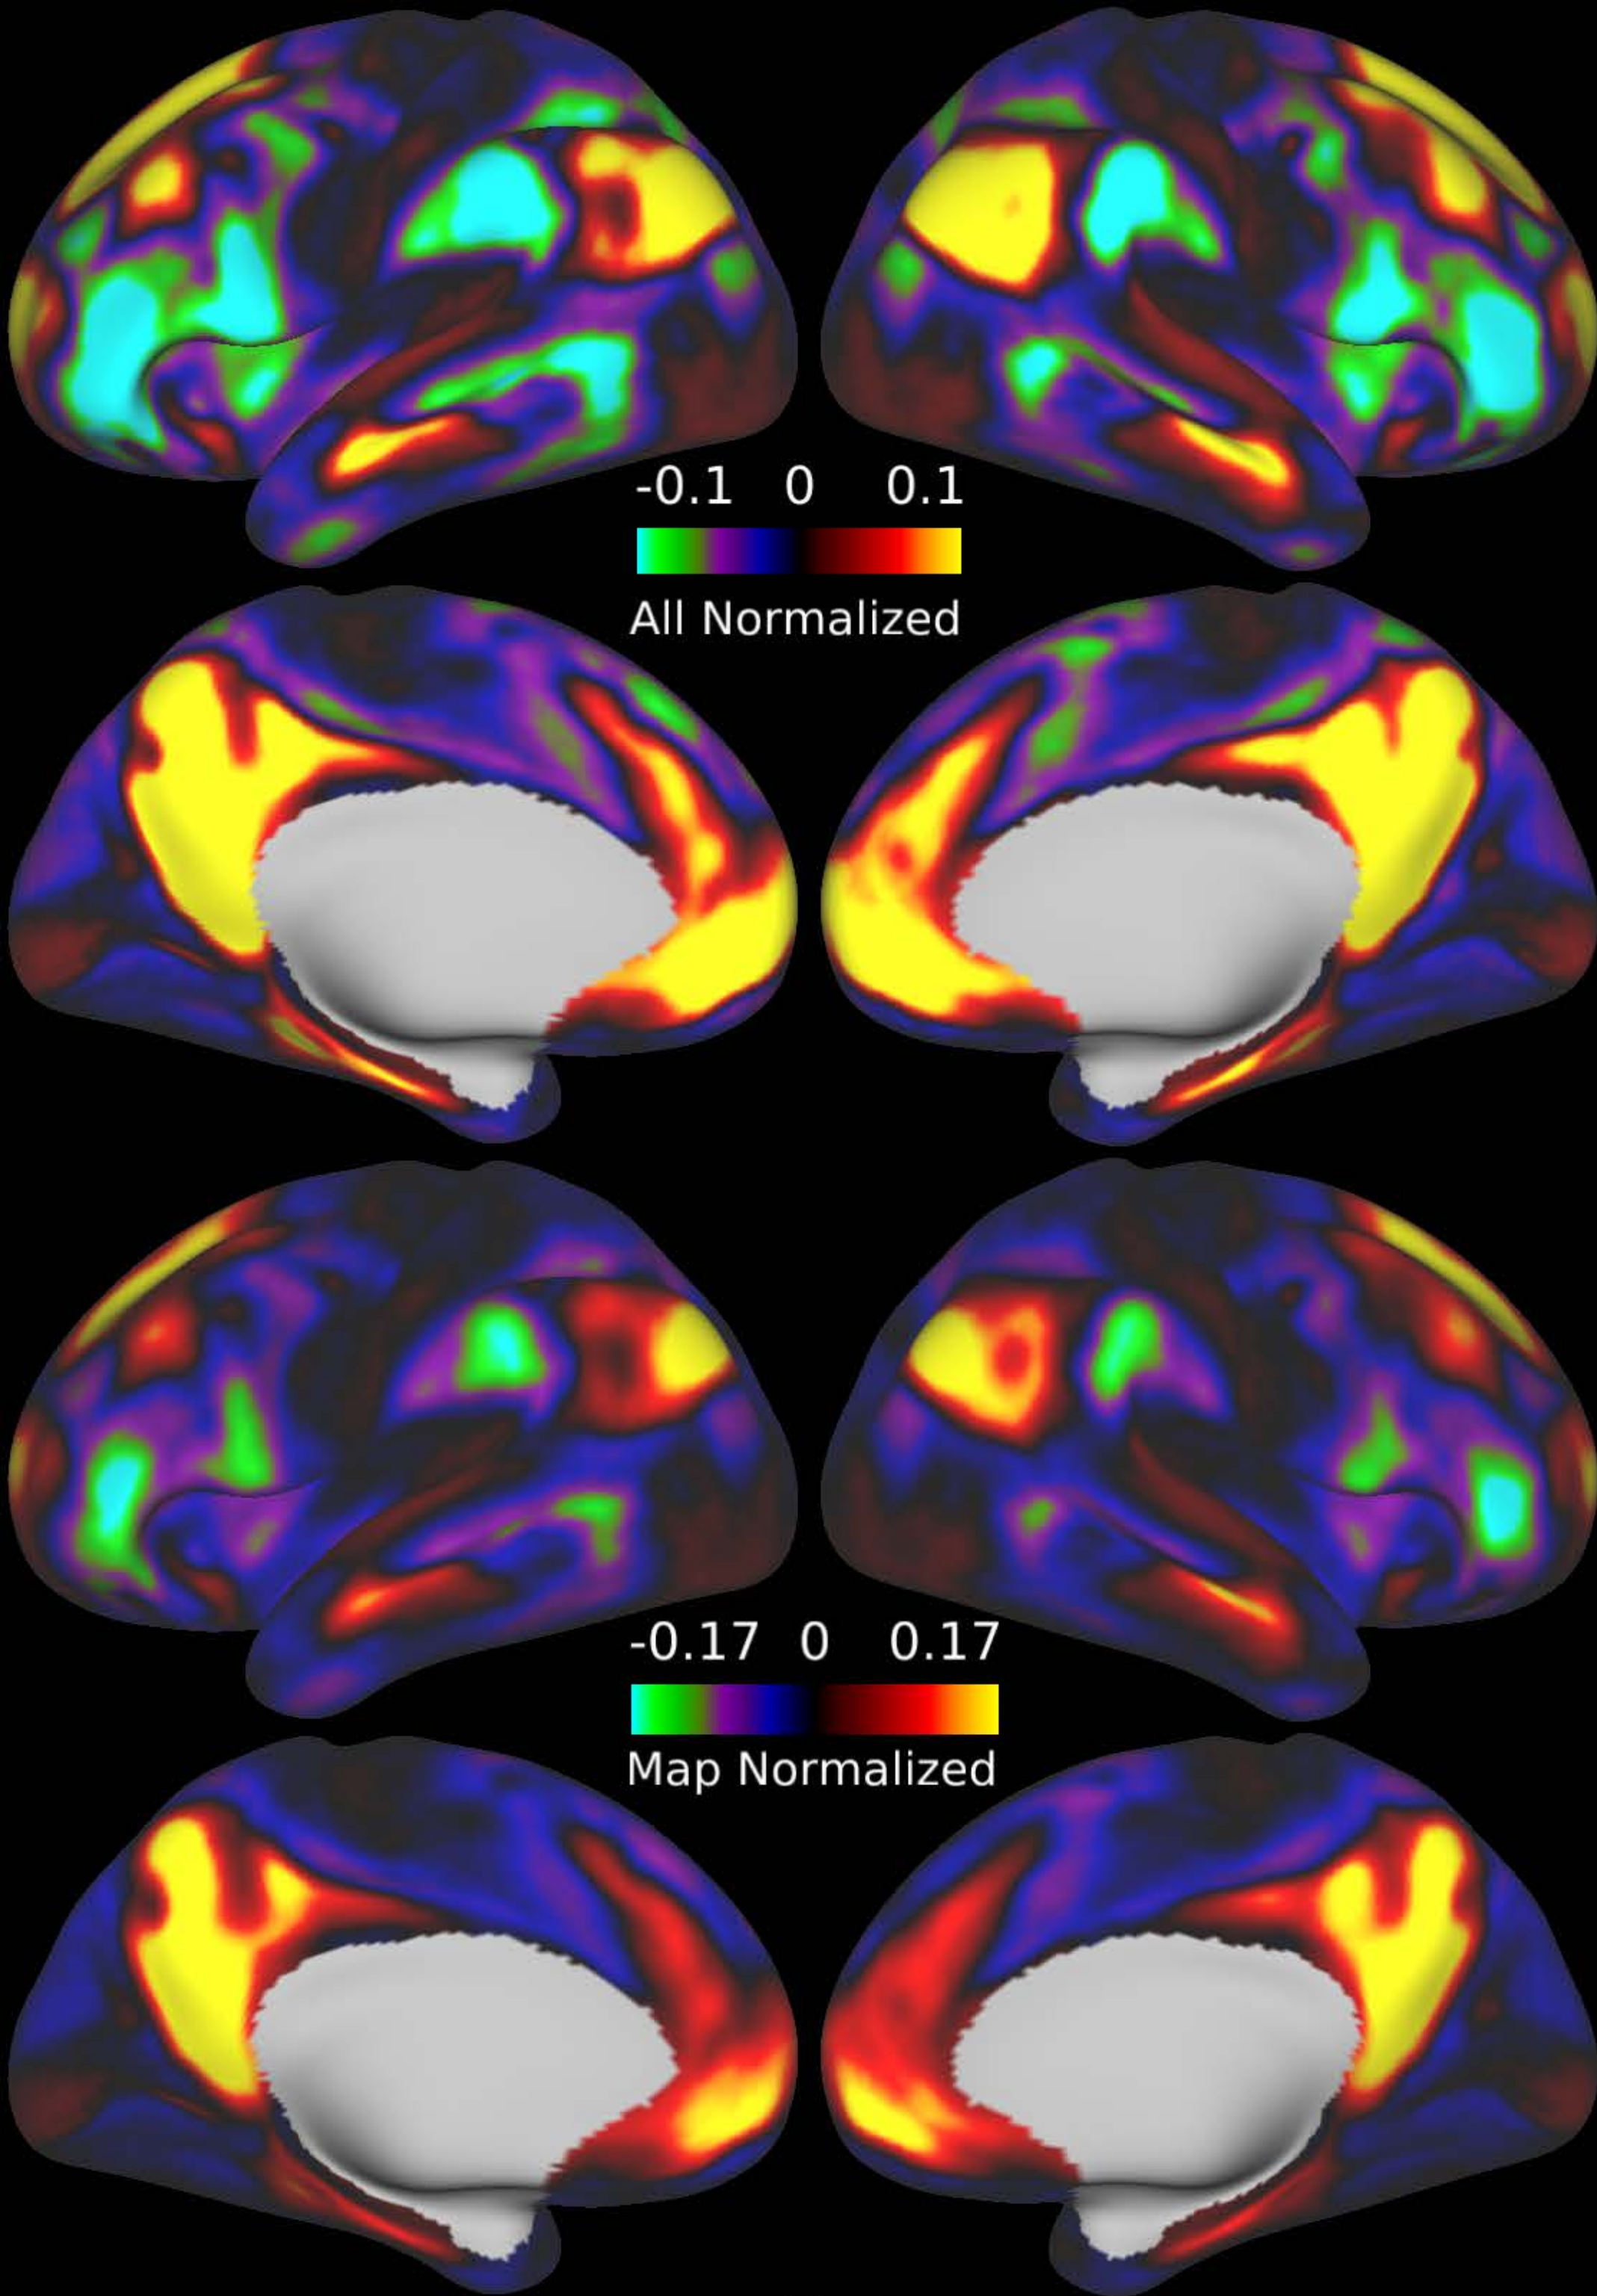

Hertz

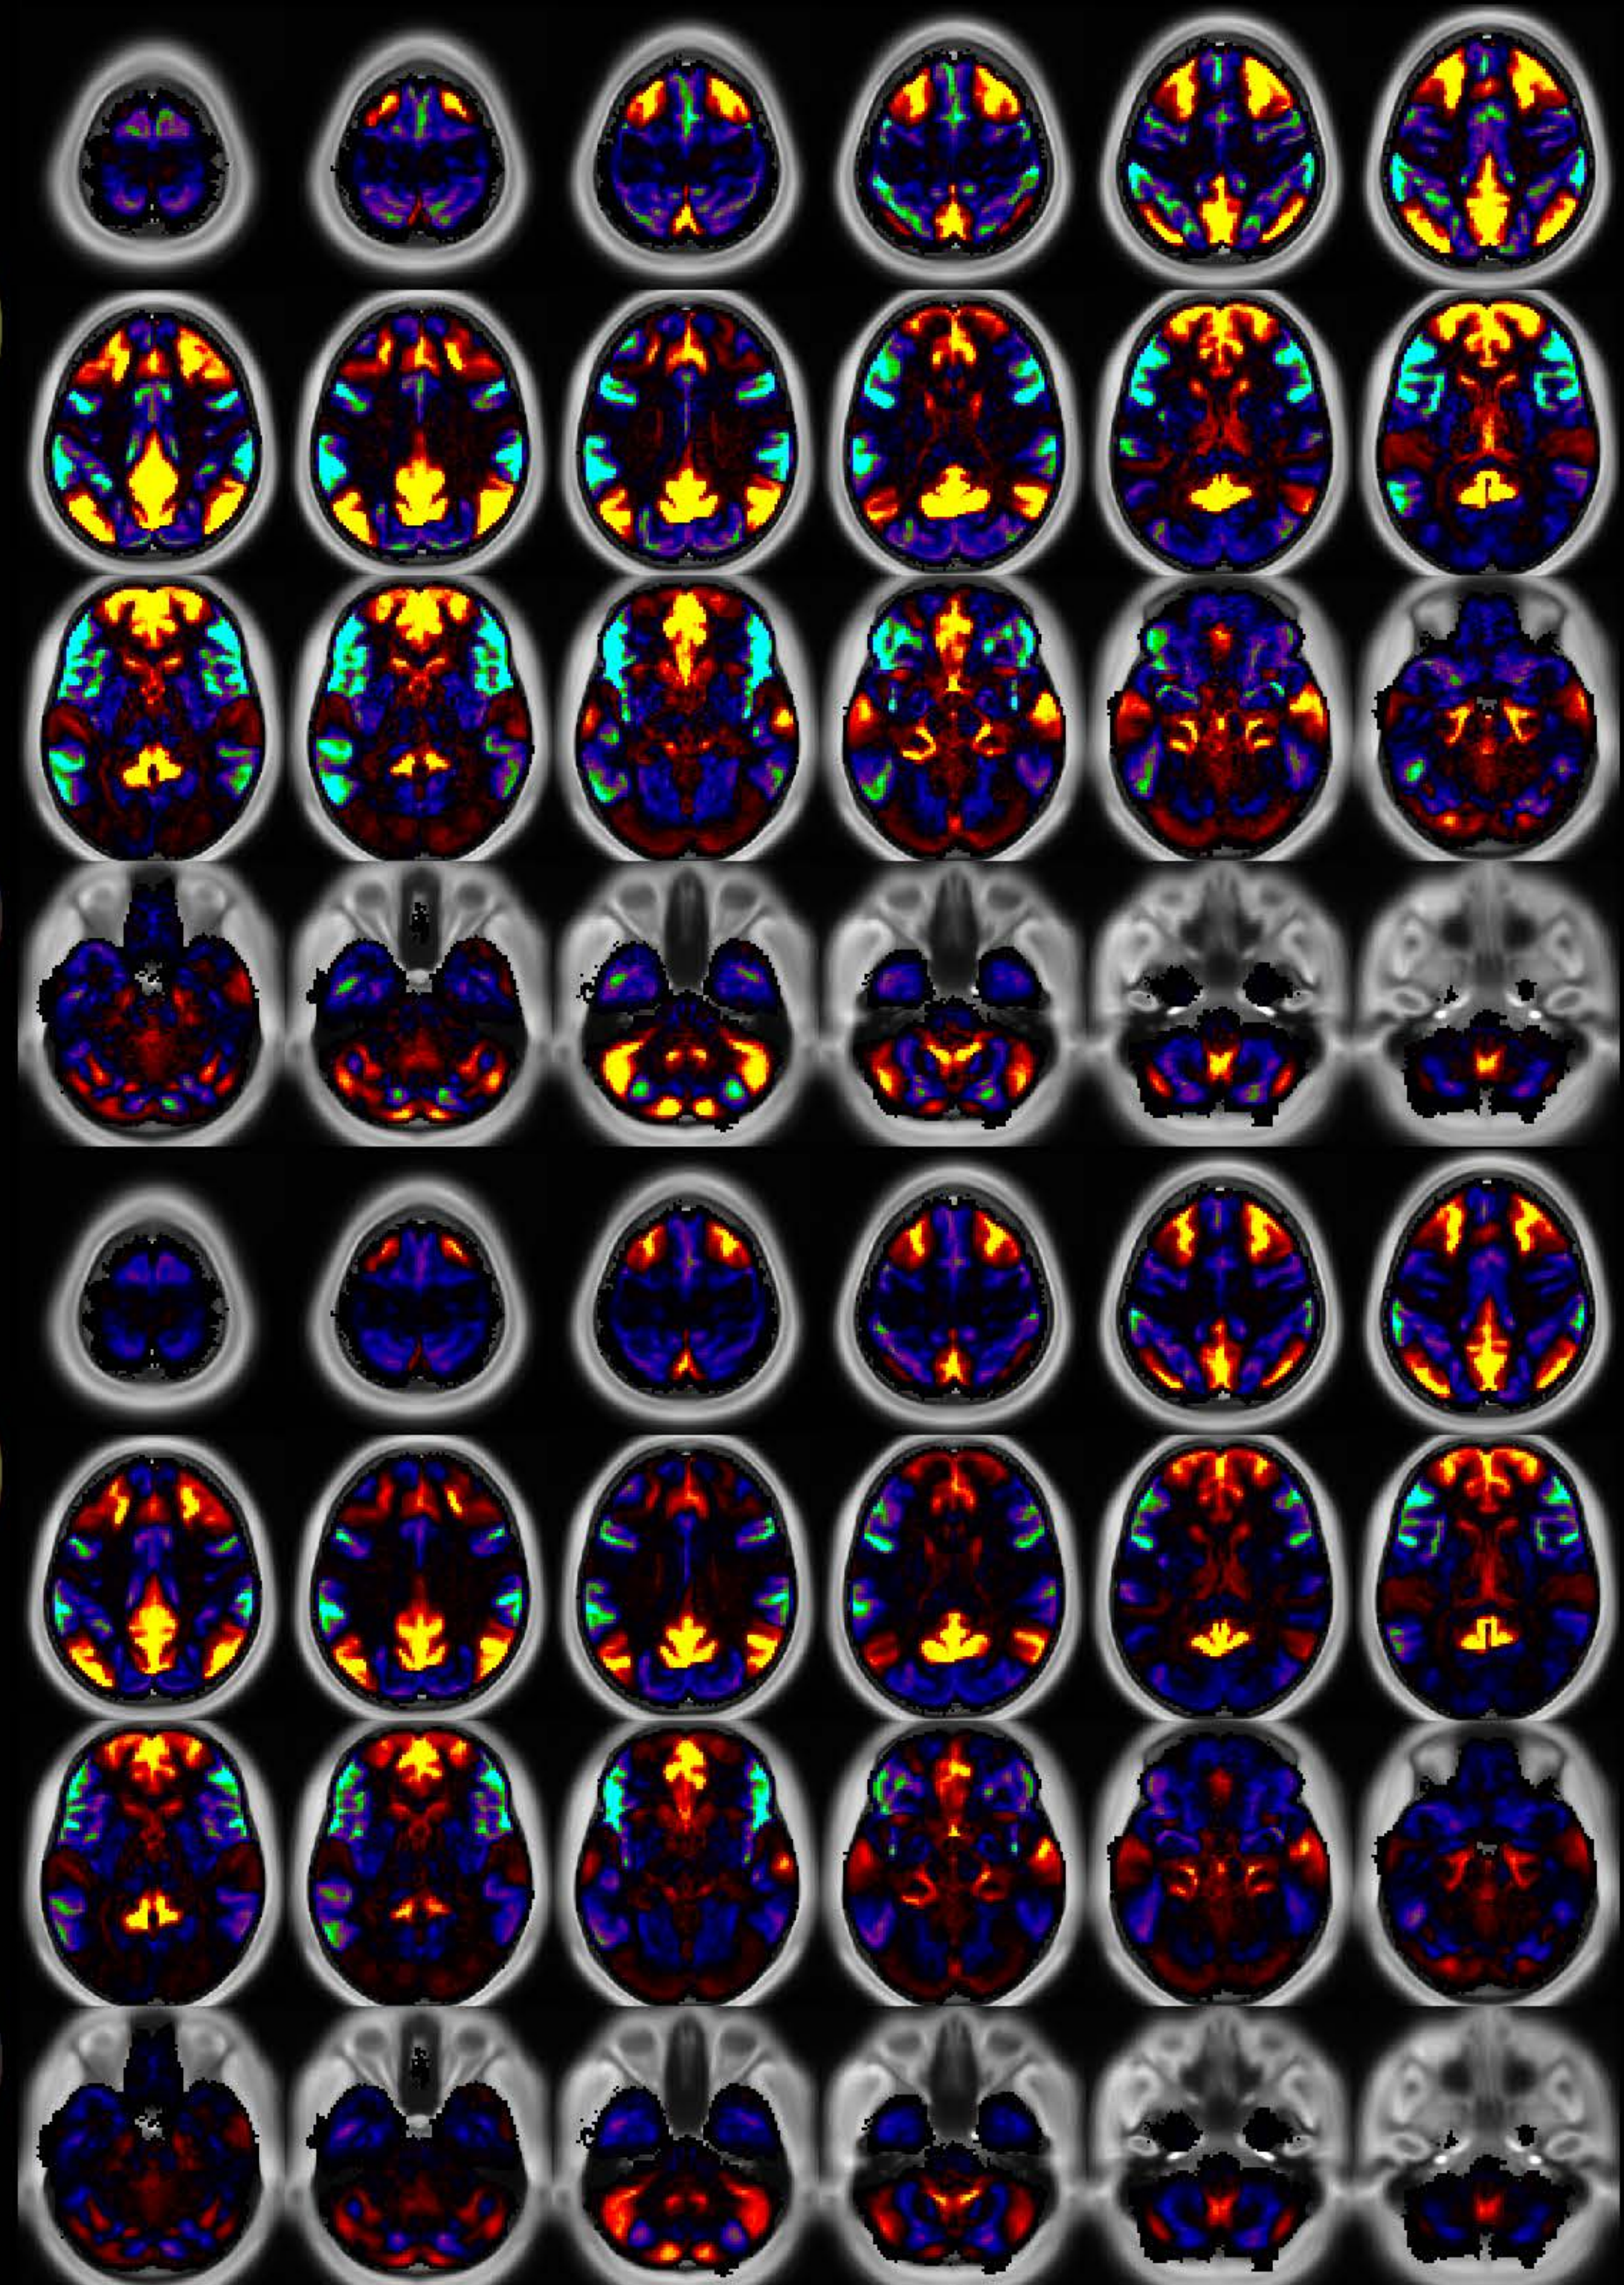

Seconds

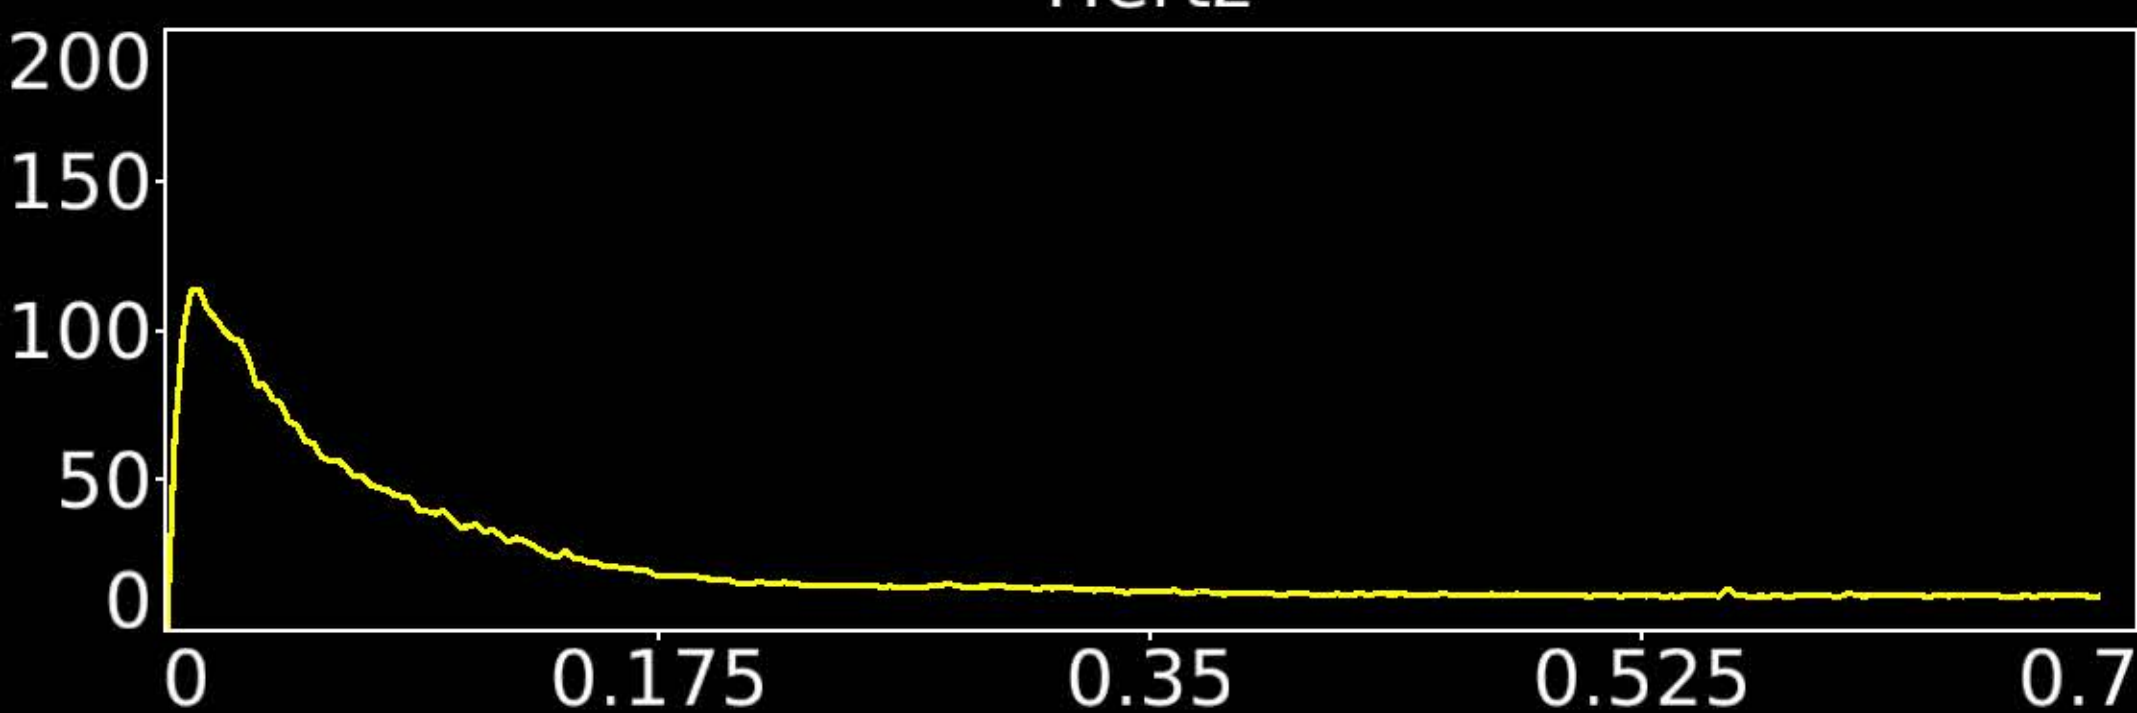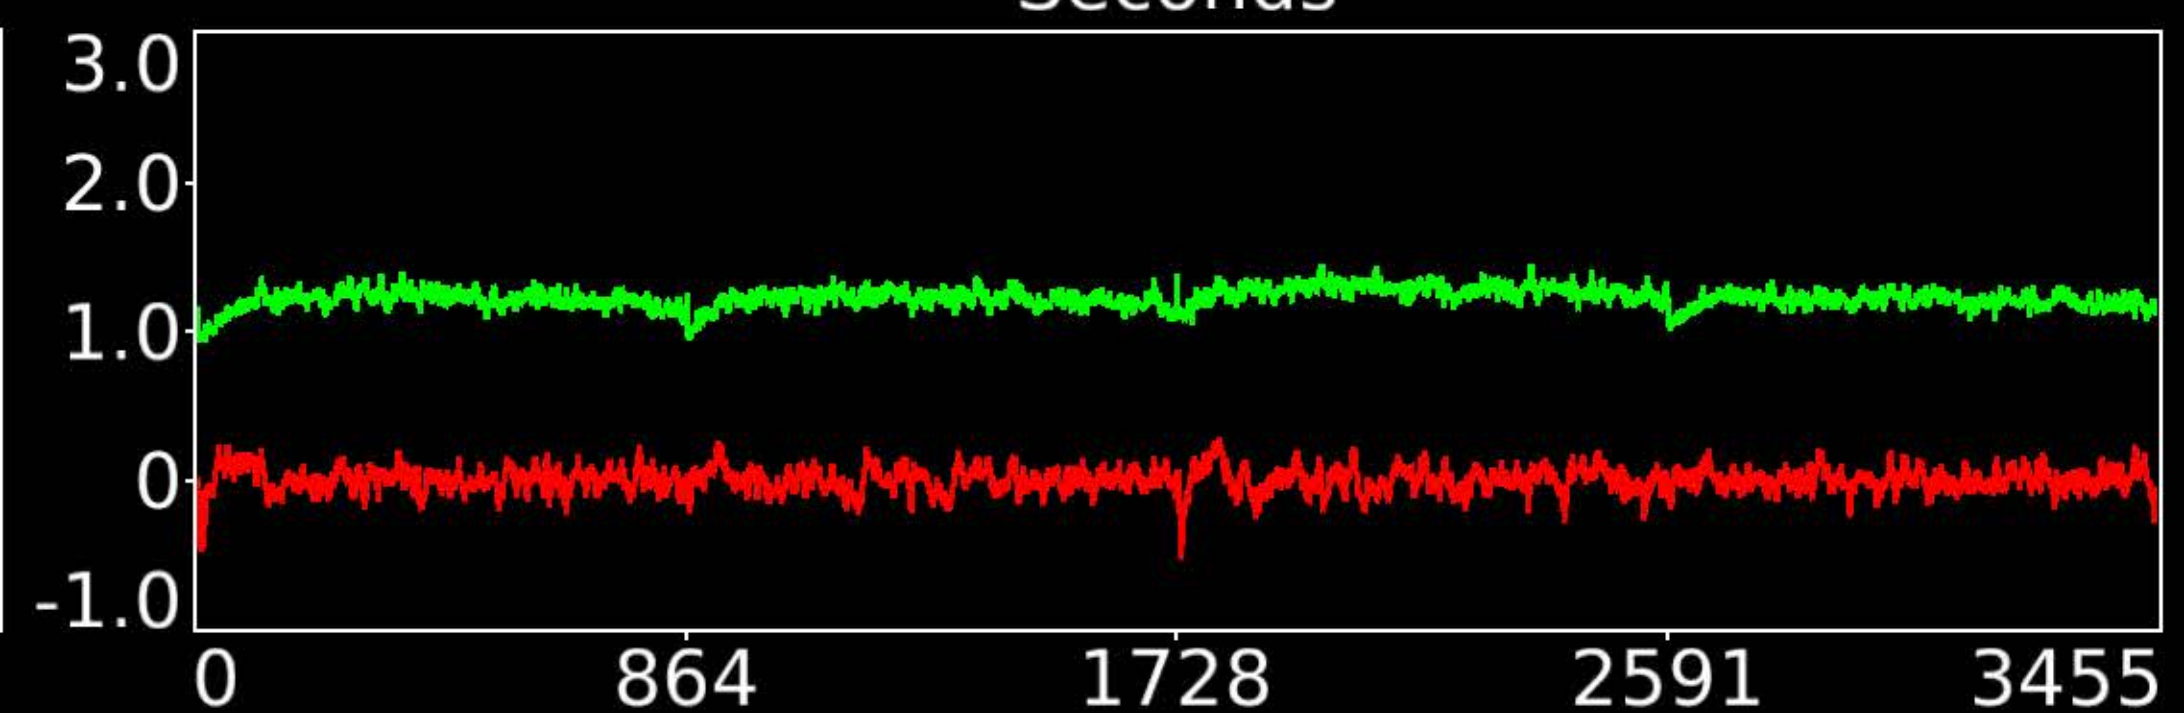

|                                                                                                                   |                            |                            |  |
|-------------------------------------------------------------------------------------------------------------------|----------------------------|----------------------------|--|
| Number & Class: 10 Signal                                                                                         |                            | Name: Primary Default Mode |  |
| RVT Correlated: No                                                                                                | DVARS Dip Associated: No   | Cross-Subject Variable: No |  |
| Single Subject: No                                                                                                | % Variance Explained: 2.39 | Globality Index: 0.35      |  |
| Task Component: 5                                                                                                 | Taskr Component: 2         | Sleep Noted: No            |  |
| Rationale: Spatial map includes positive and negative patches that respect known RSNs (e.g. Default Mode Network) |                            |                            |  |



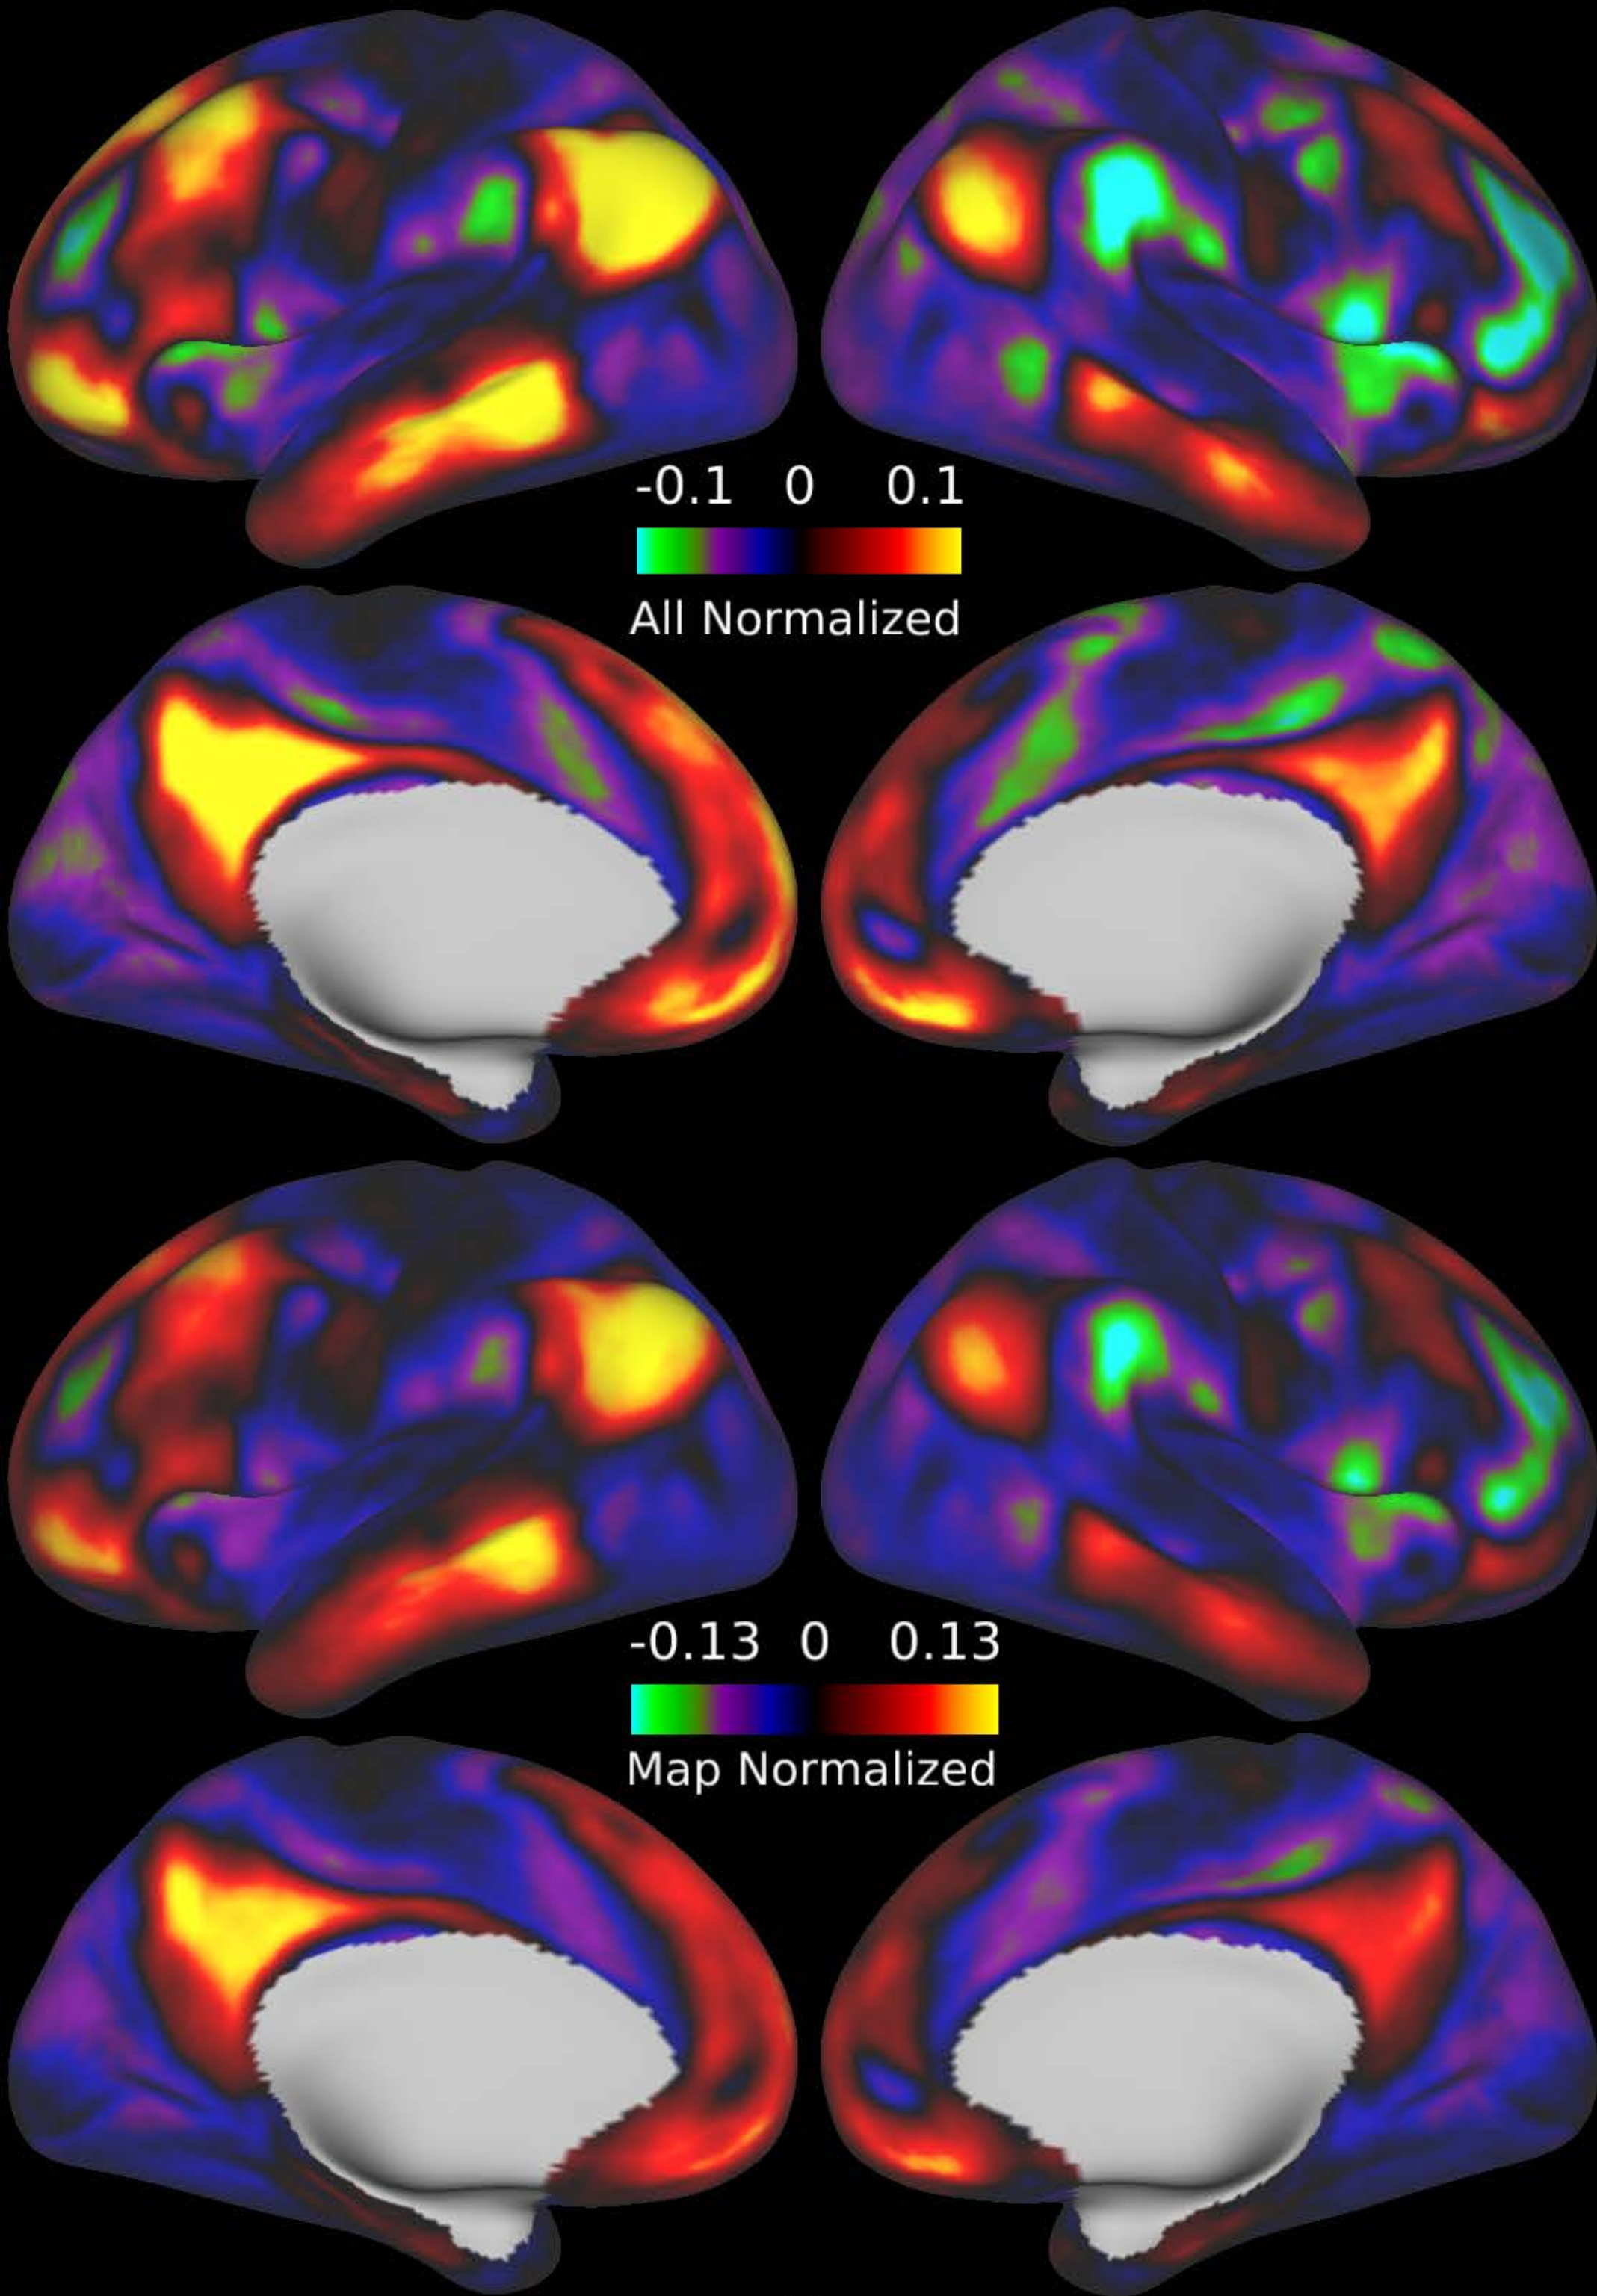

Hertz

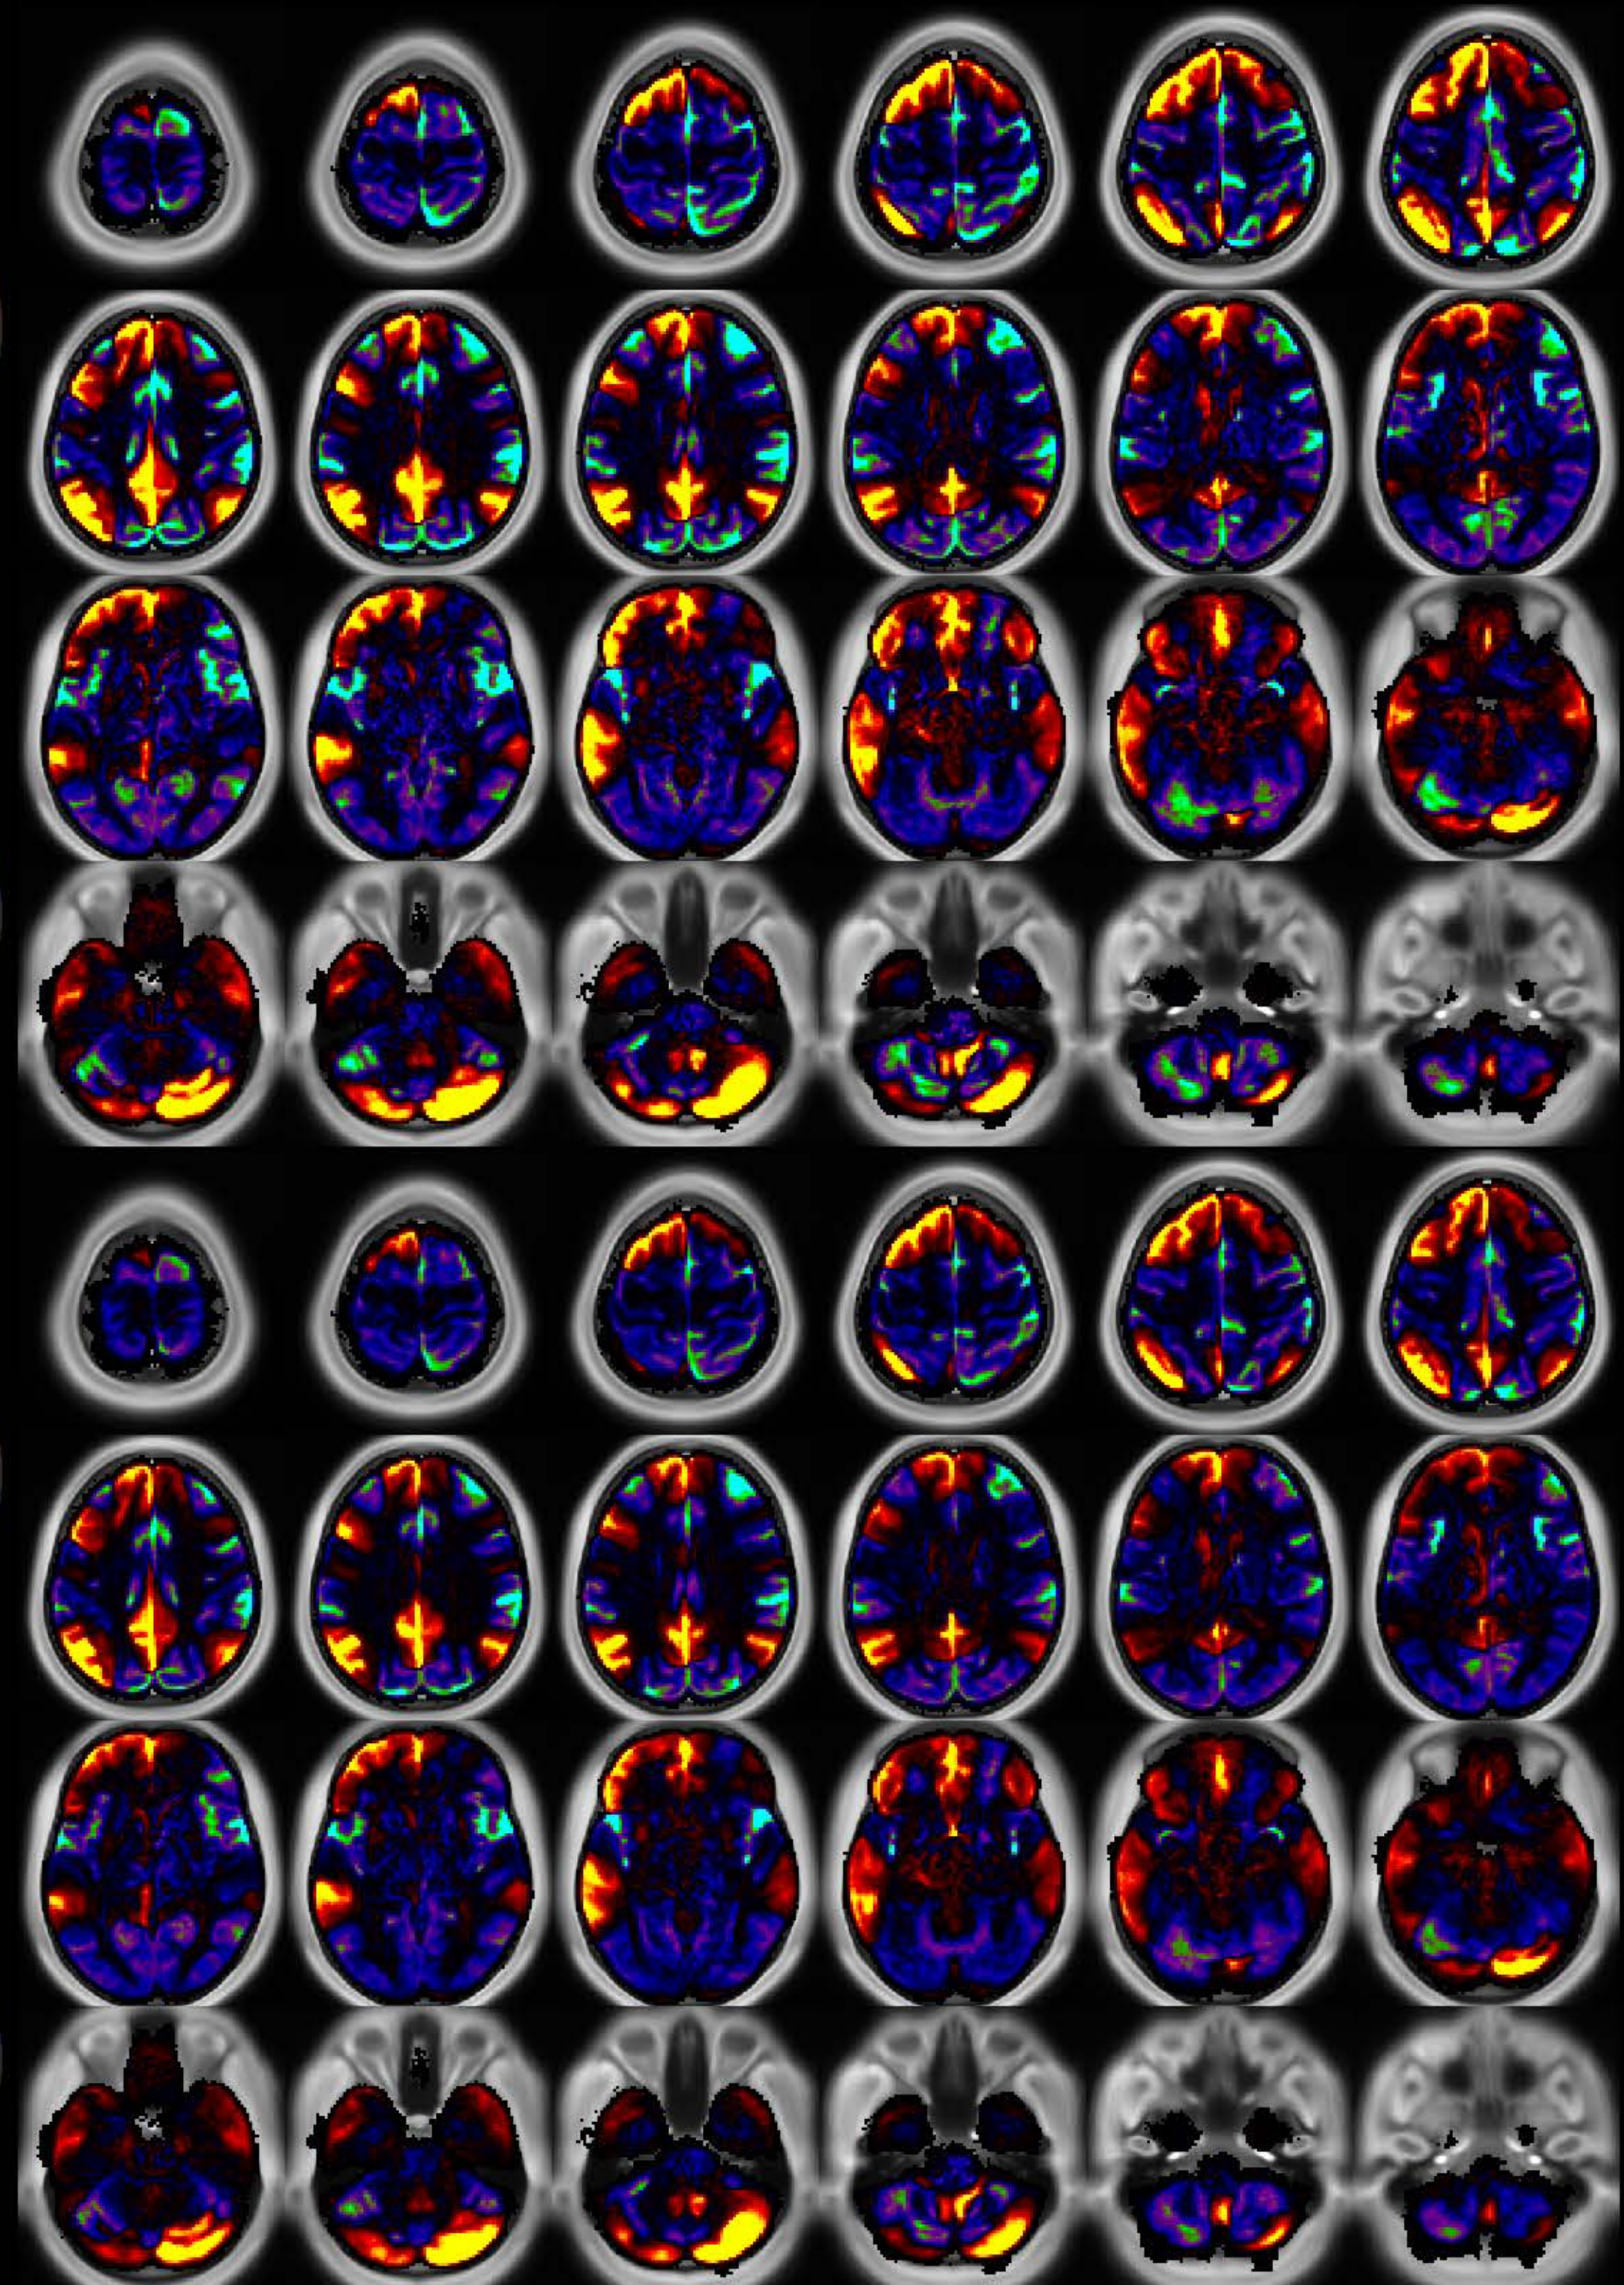

Seconds

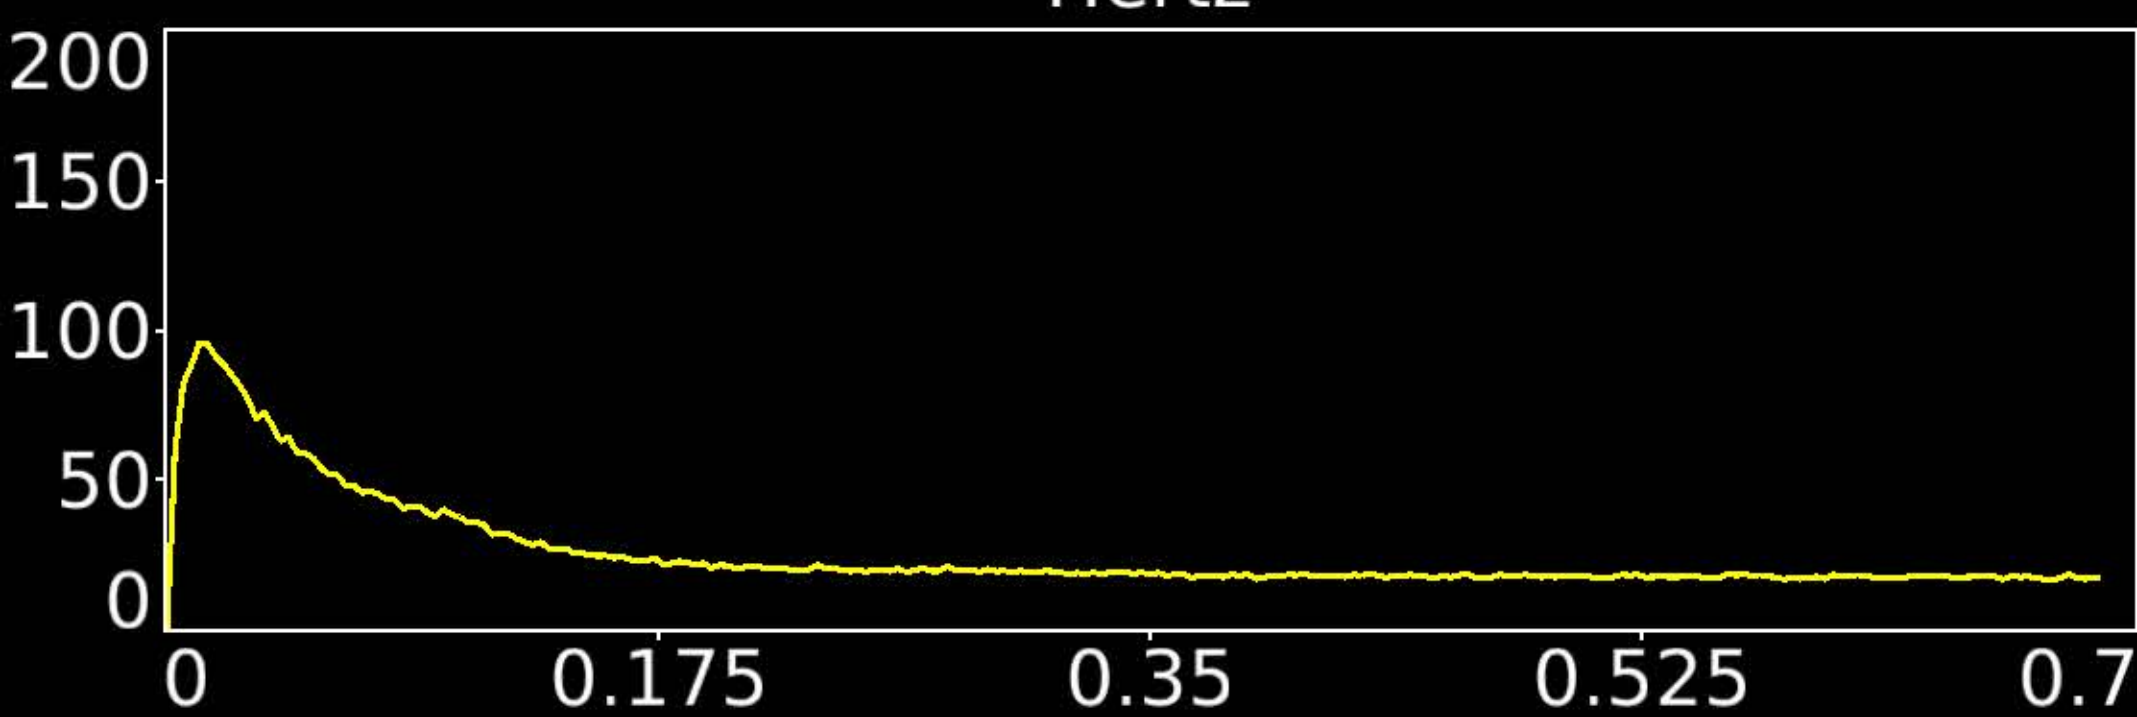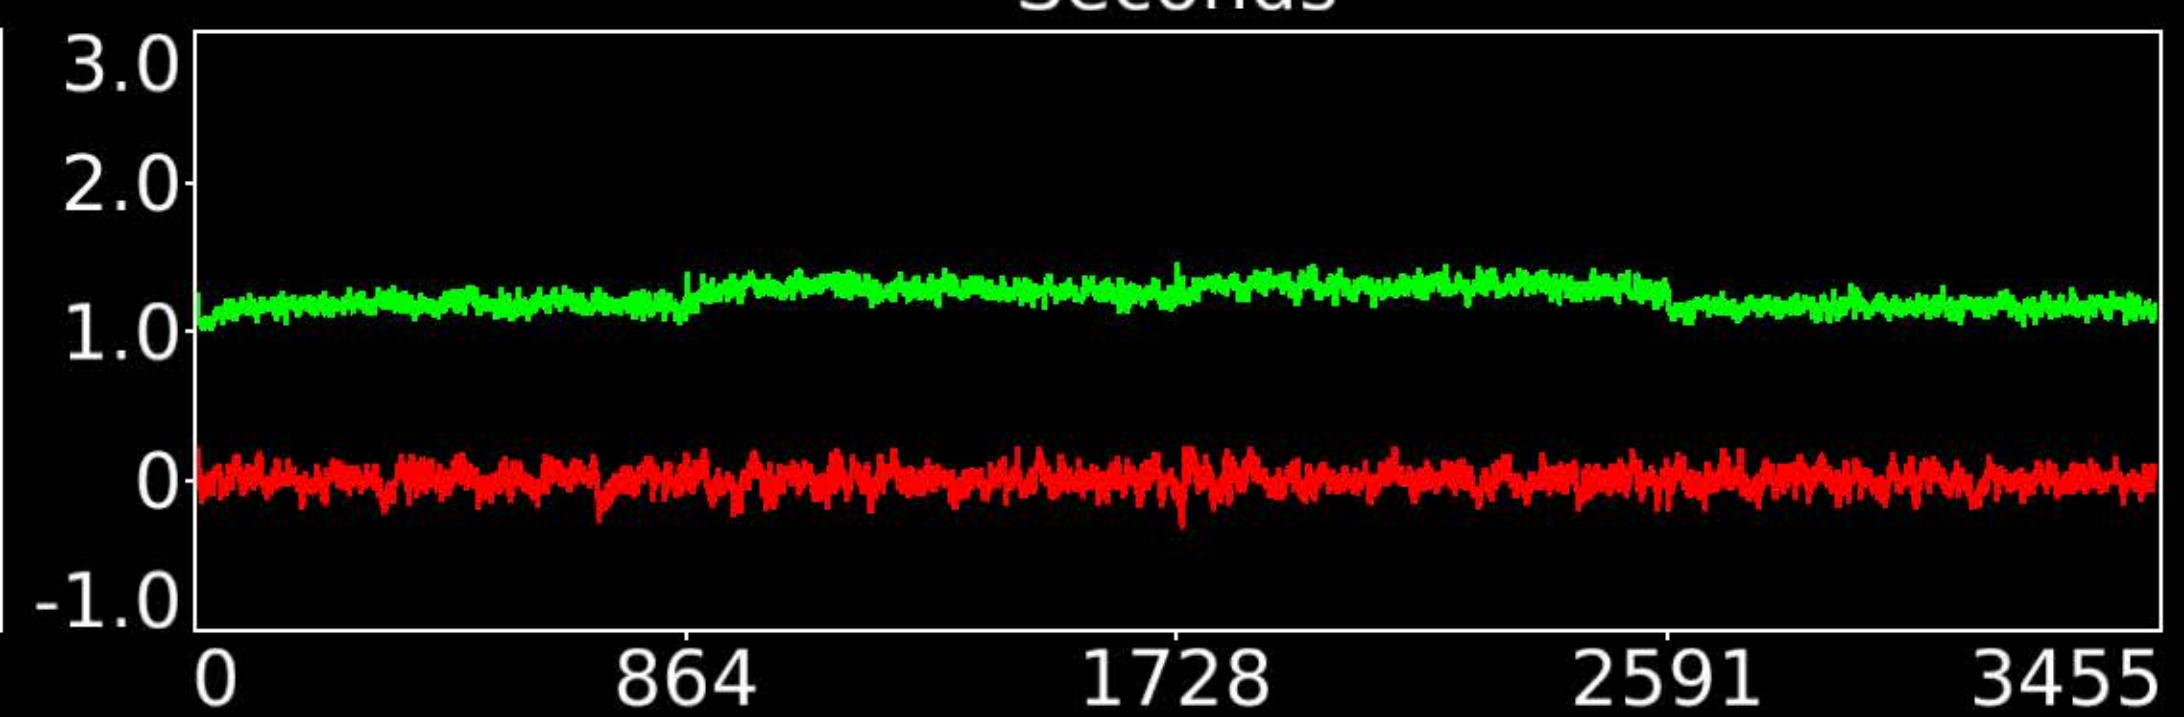

|                                                                                                                   |                            |                                         |  |
|-------------------------------------------------------------------------------------------------------------------|----------------------------|-----------------------------------------|--|
| Number & Class: 11 Signal                                                                                         |                            | Name: Default Mode L Primary Cerebellar |  |
| RVT Correlated: No                                                                                                | DVARS Dip Associated: No   | Cross-Subject Variable: No              |  |
| Single Subject: No                                                                                                | % Variance Explained: 2.33 | Globality Index: 0.91                   |  |
| Task Component: No                                                                                                | Taskr Component: No        | Sleep Noted: No                         |  |
| Rationale: Spatial map includes positive and negative patches that respect known RSNs (e.g. Default Mode Network) |                            |                                         |  |



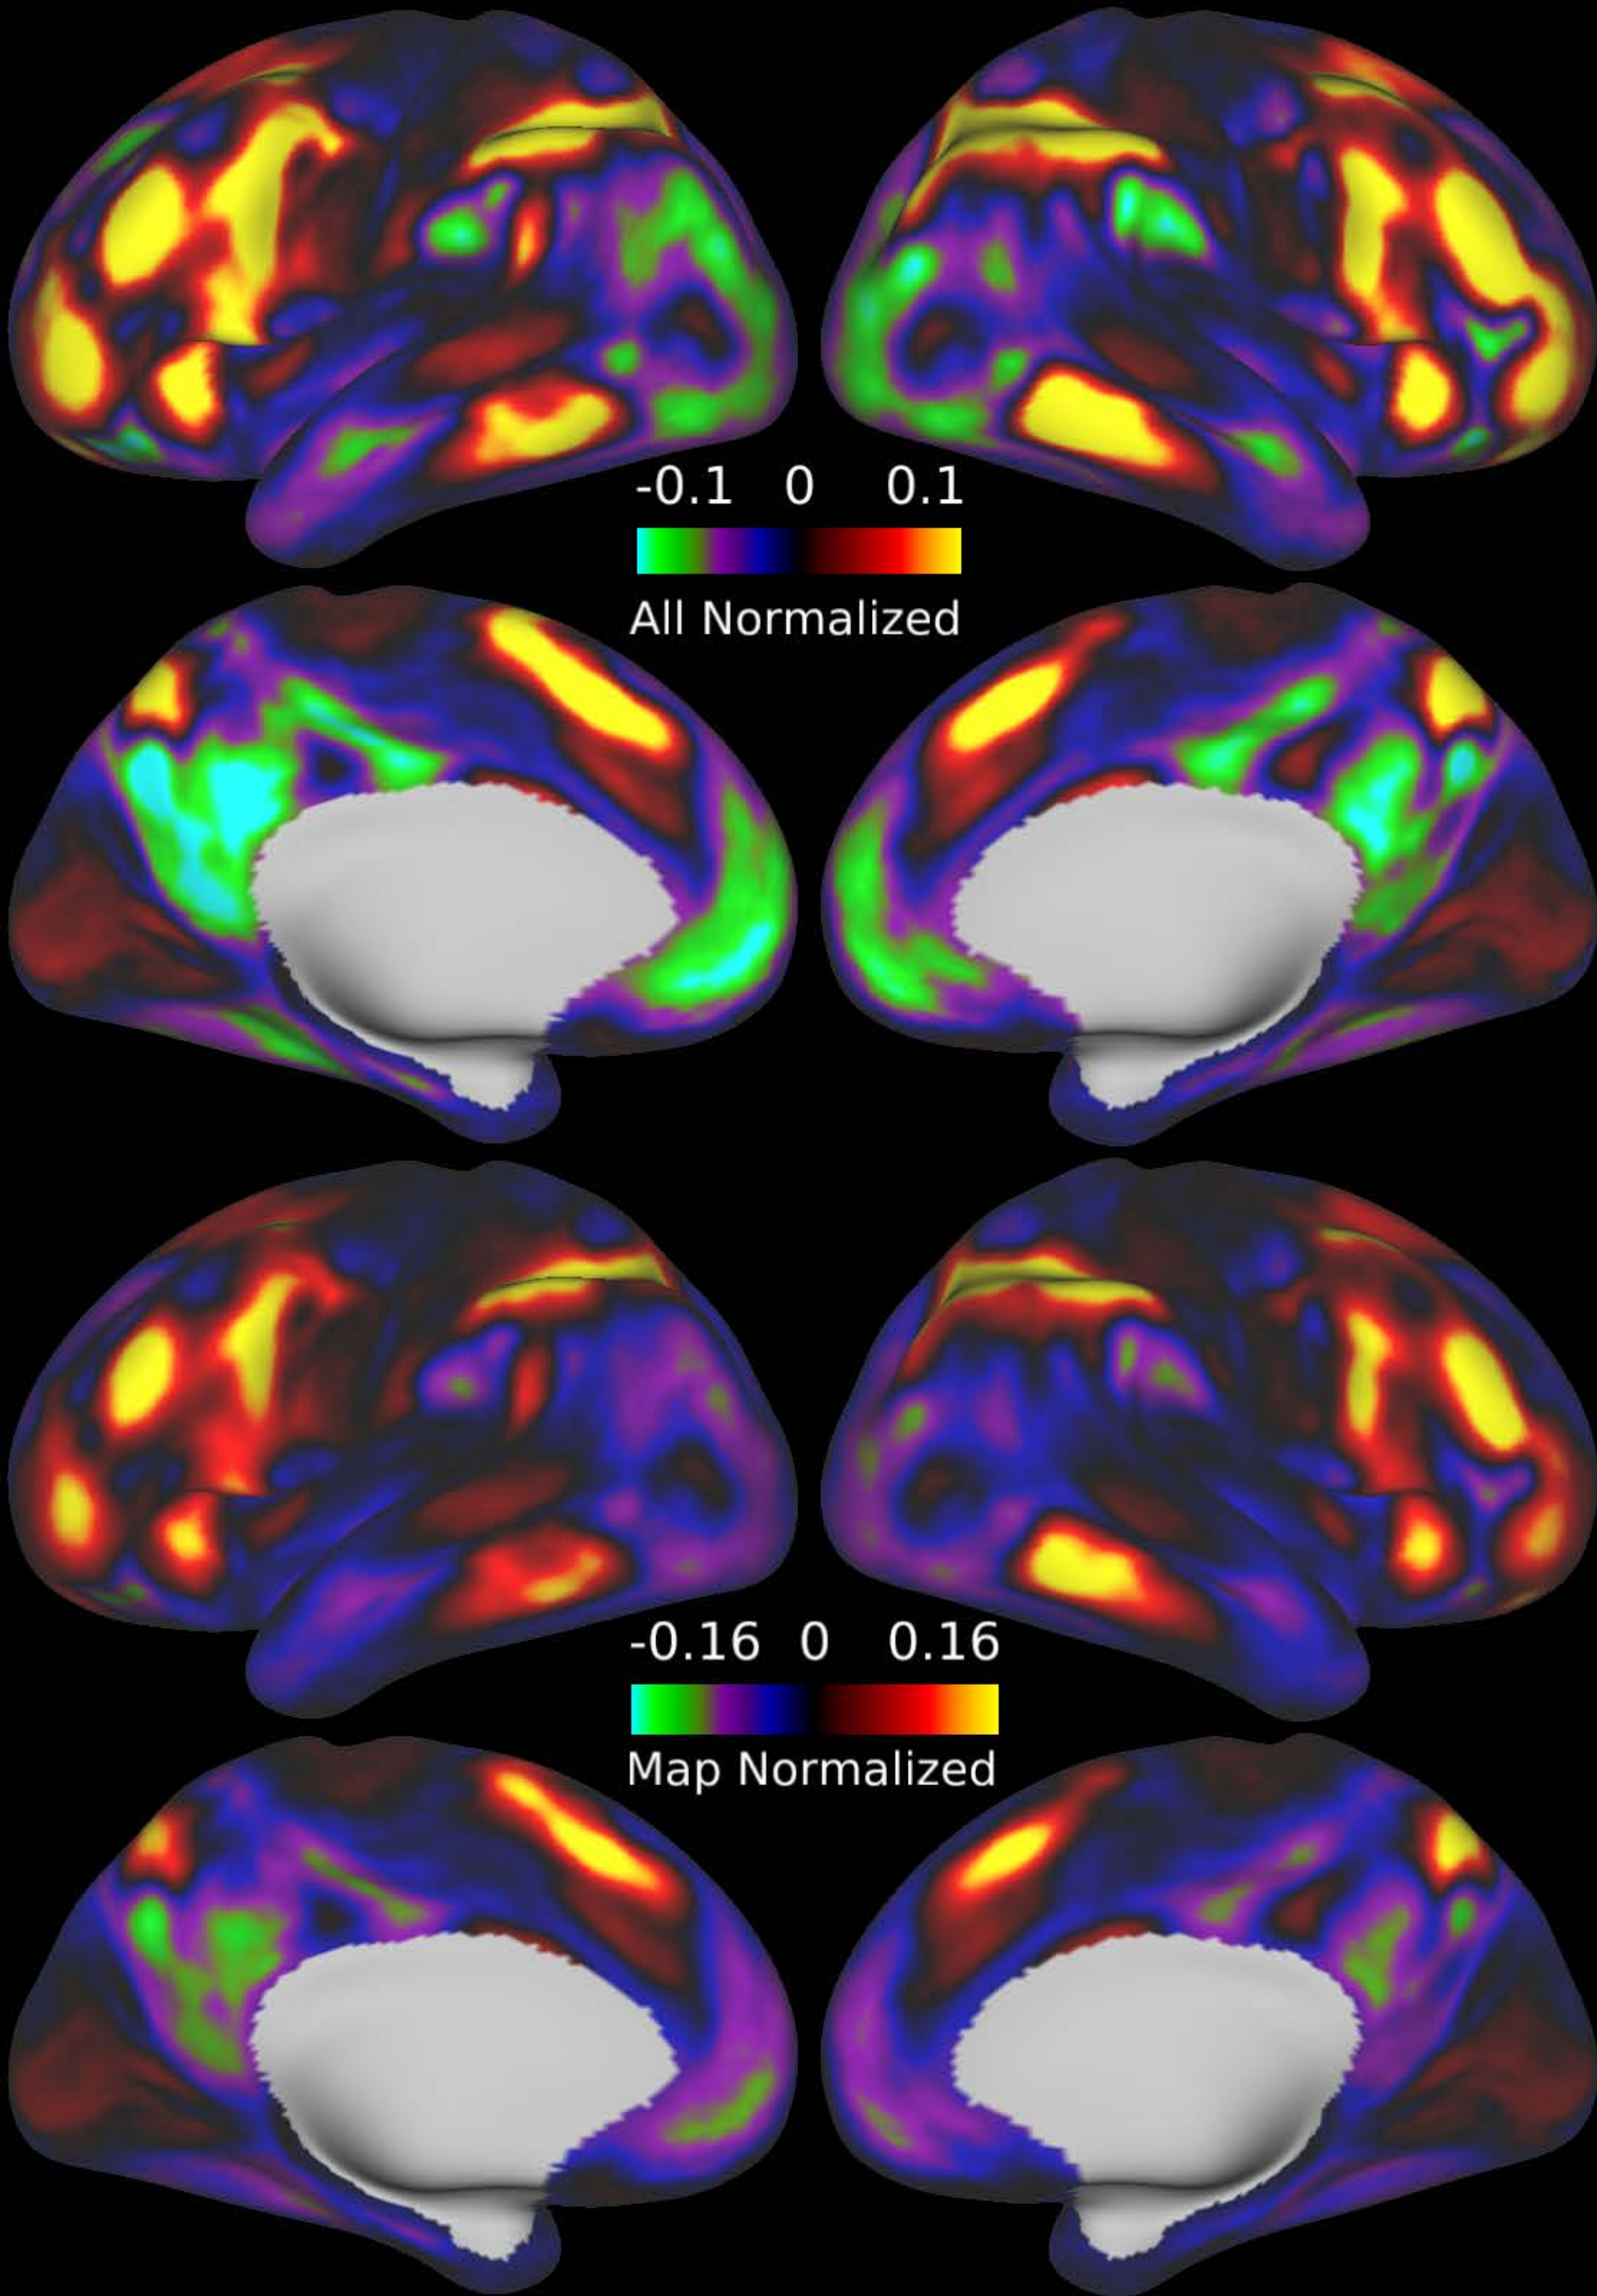

Hertz

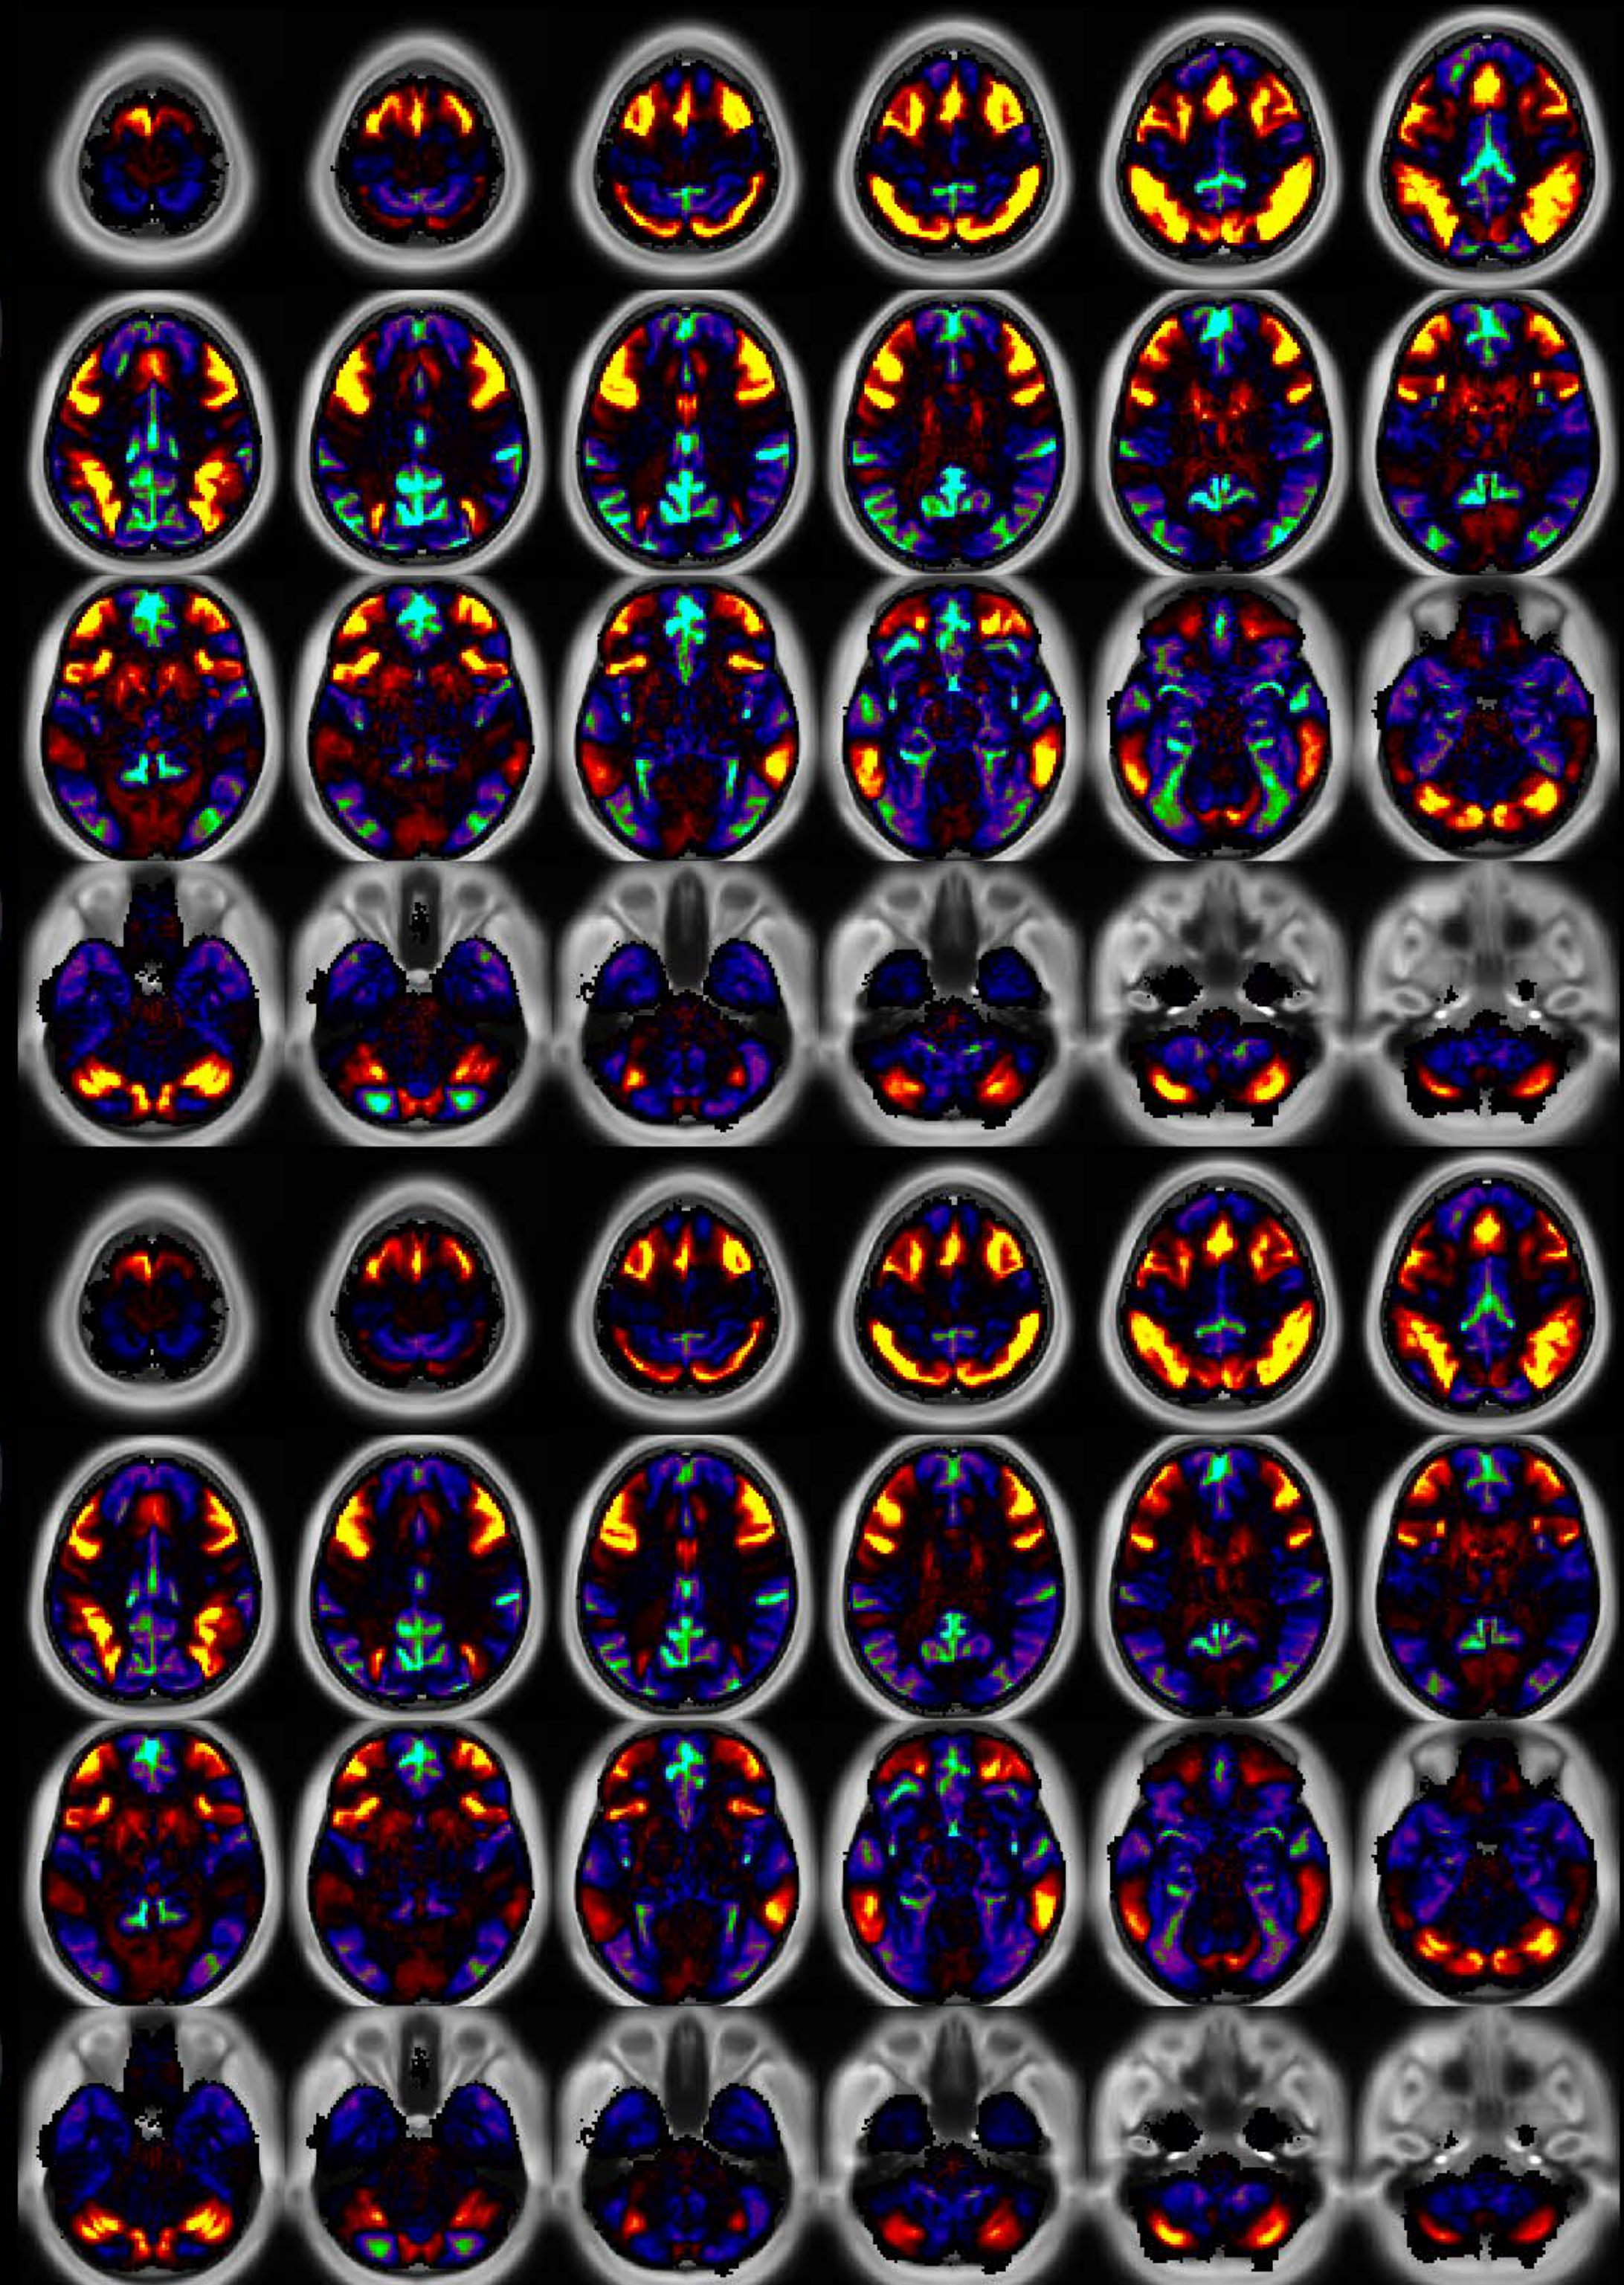

Seconds

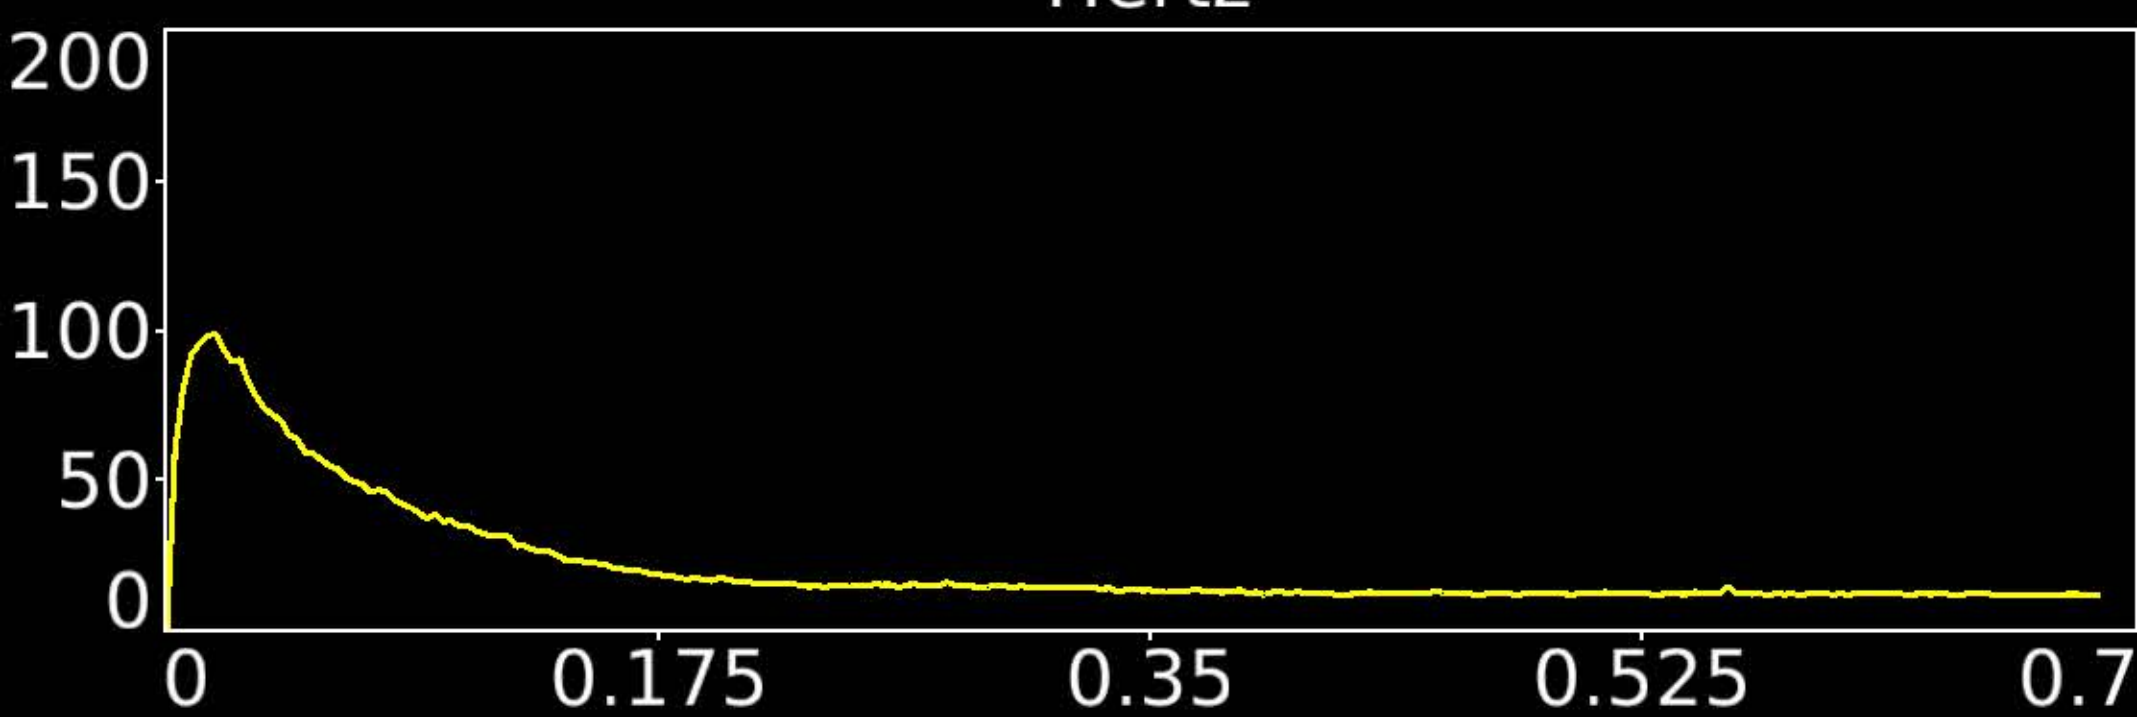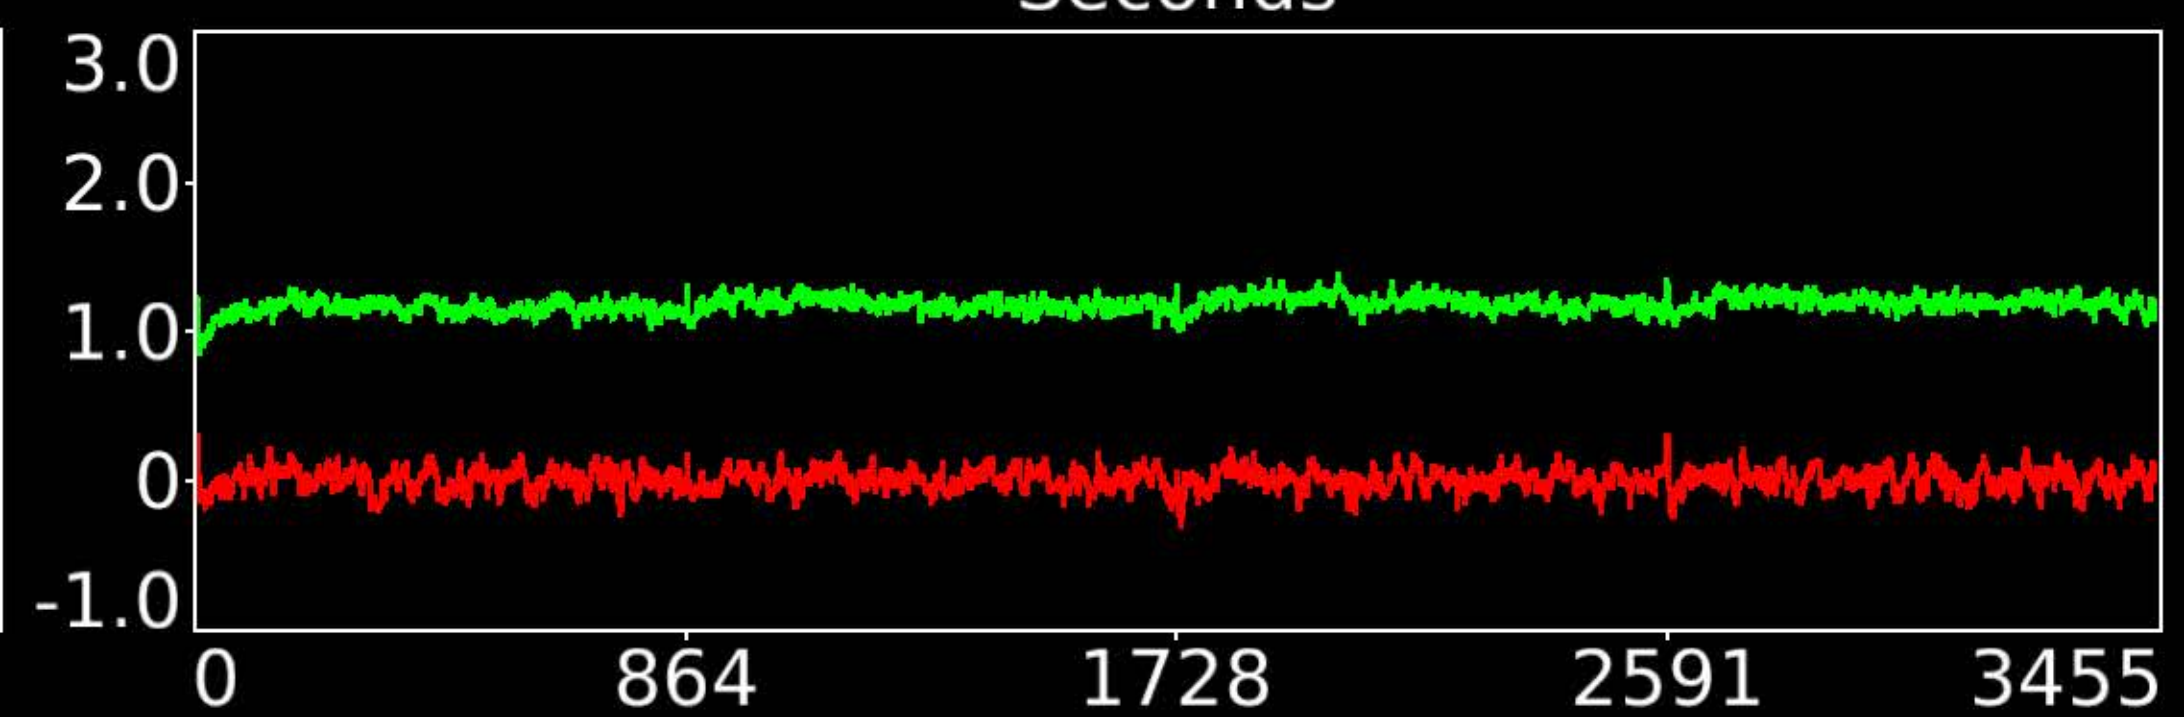

|                                                                                                                      |                            |                               |  |
|----------------------------------------------------------------------------------------------------------------------|----------------------------|-------------------------------|--|
| Number & Class: 12 Signal                                                                                            |                            | Name: Fronto-Parietal Network |  |
| RVT Correlated: No                                                                                                   | DVARS Dip Associated: No   | Cross-Subject Variable: No    |  |
| Single Subject: No                                                                                                   | % Variance Explained: 2.25 | Globality Index: 0.56         |  |
| Task Component: 4                                                                                                    | Taskr Component: 12+17+2   | Sleep Noted: No               |  |
| Rationale: Spatial map includes positive and negative patches that respect known RSNs (e.g. Fronto-Parietal Network) |                            |                               |  |



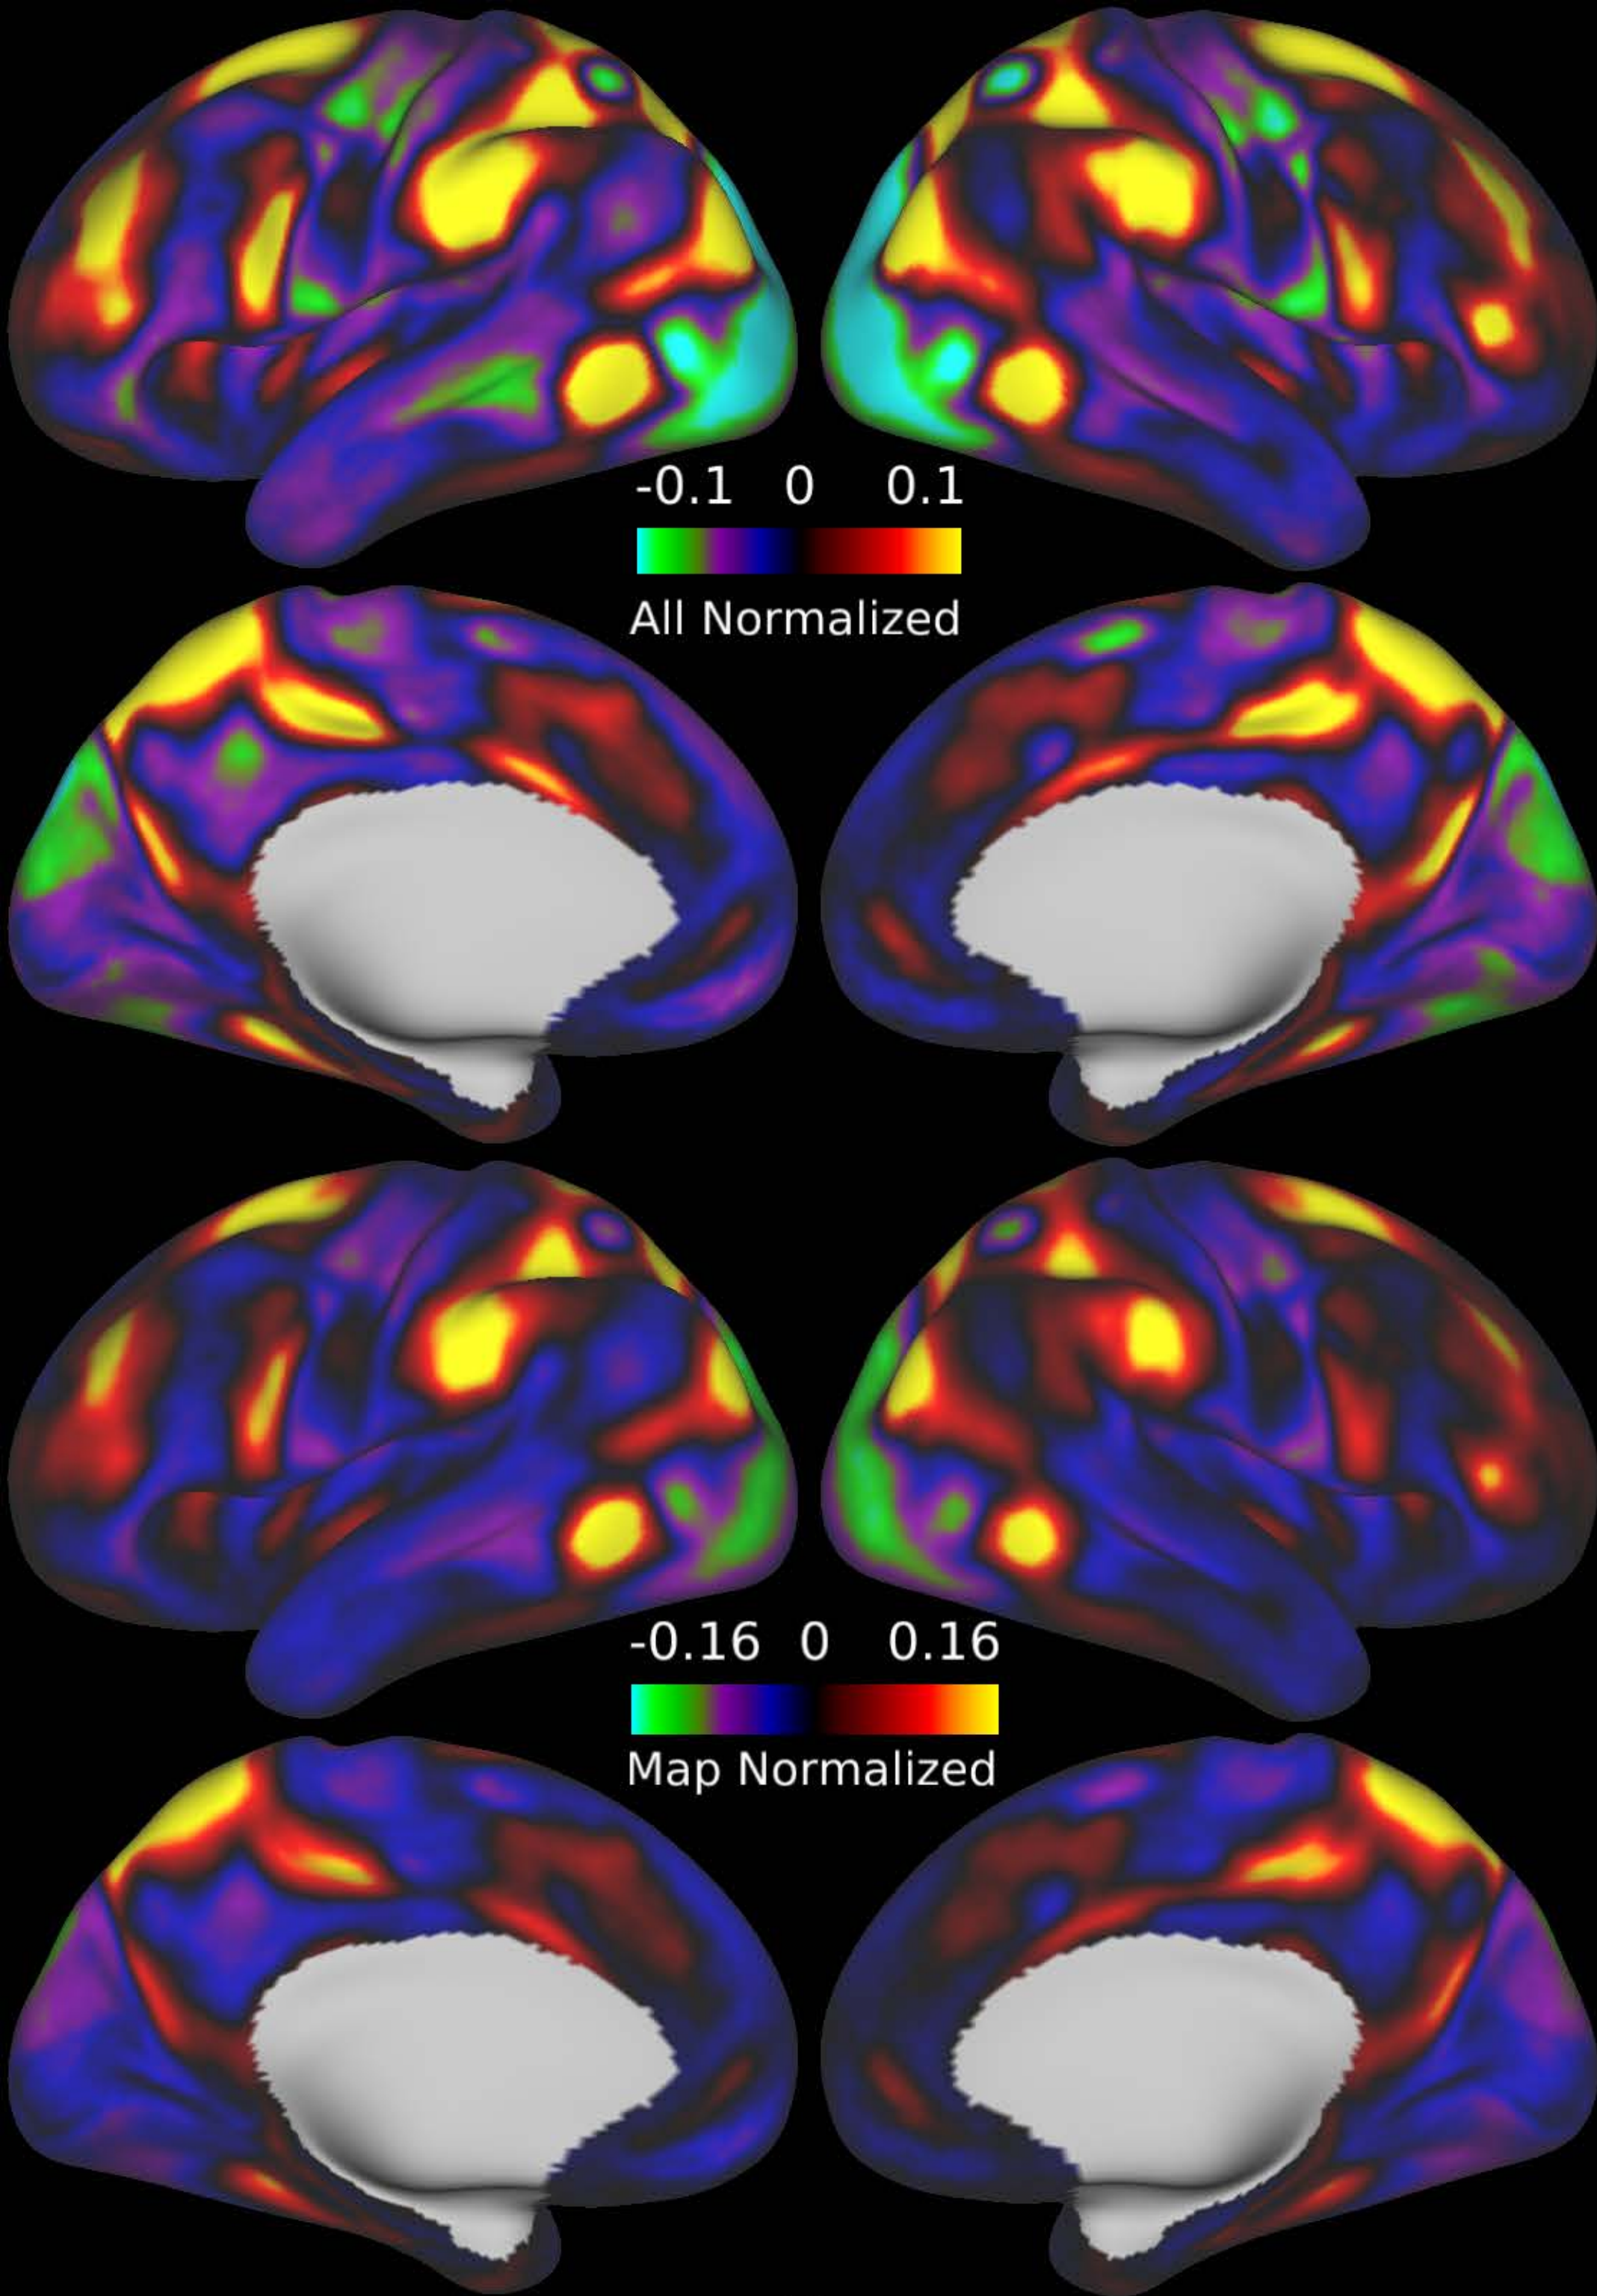

Hertz

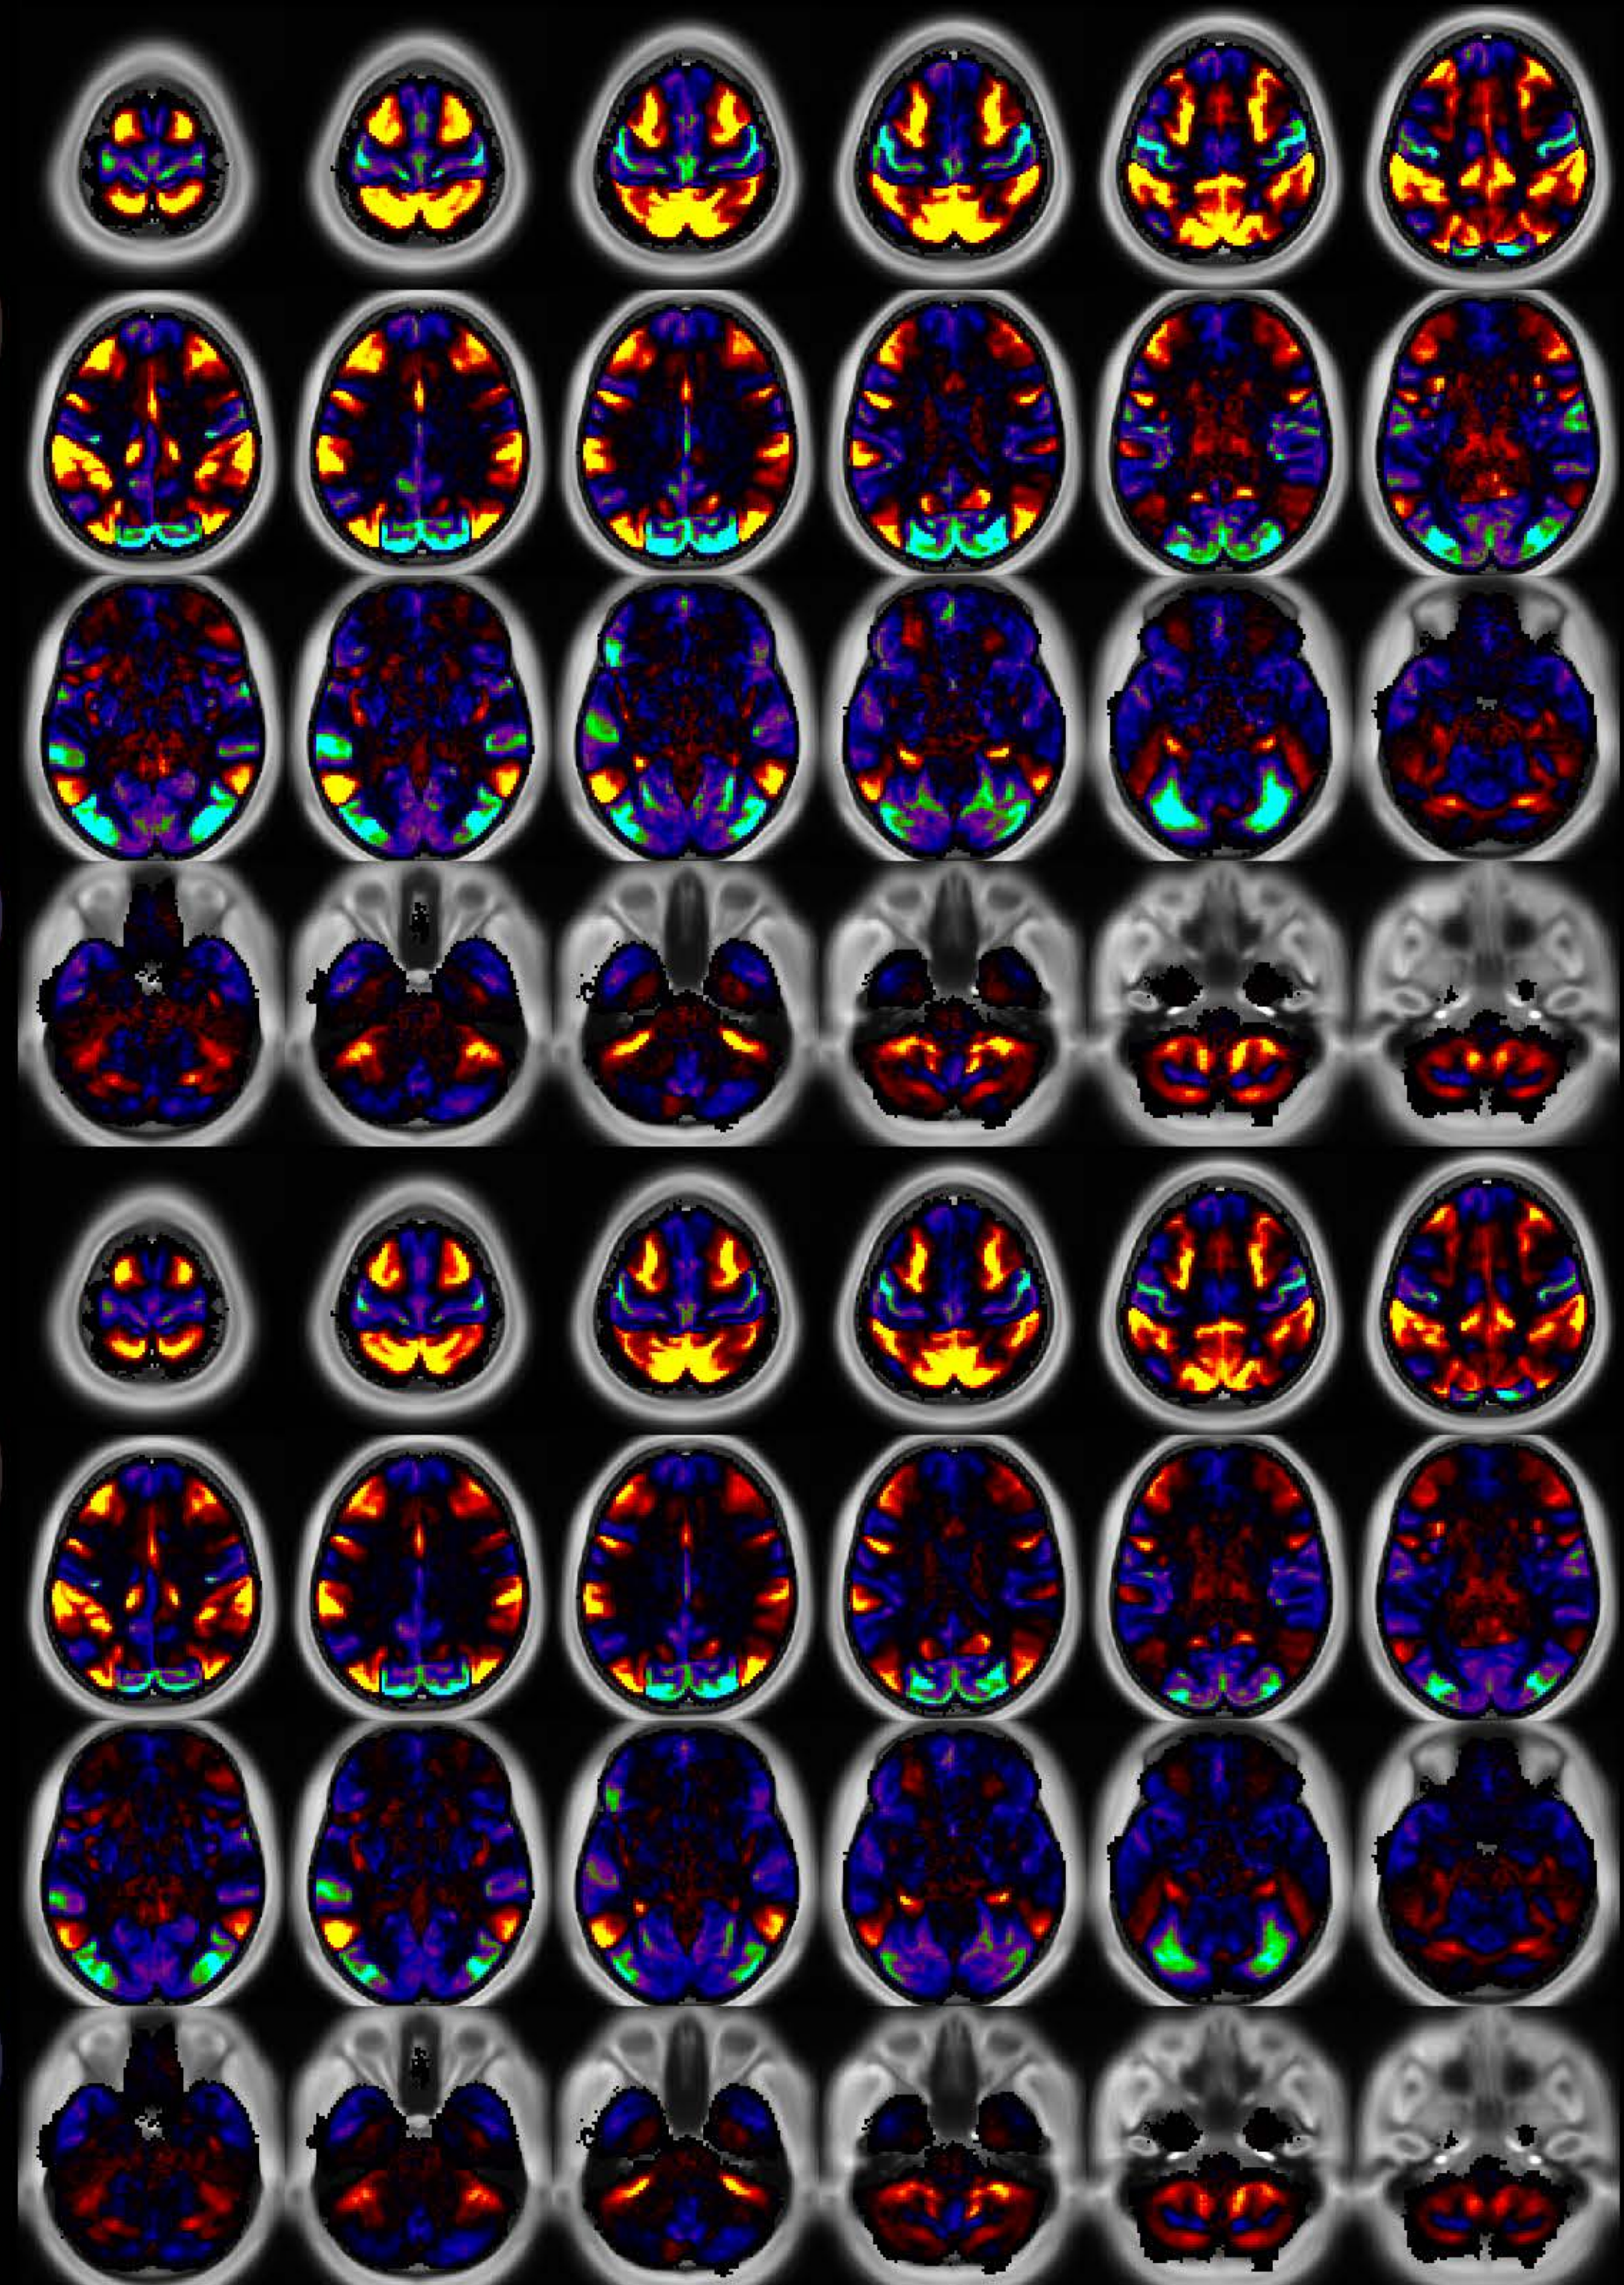

Seconds

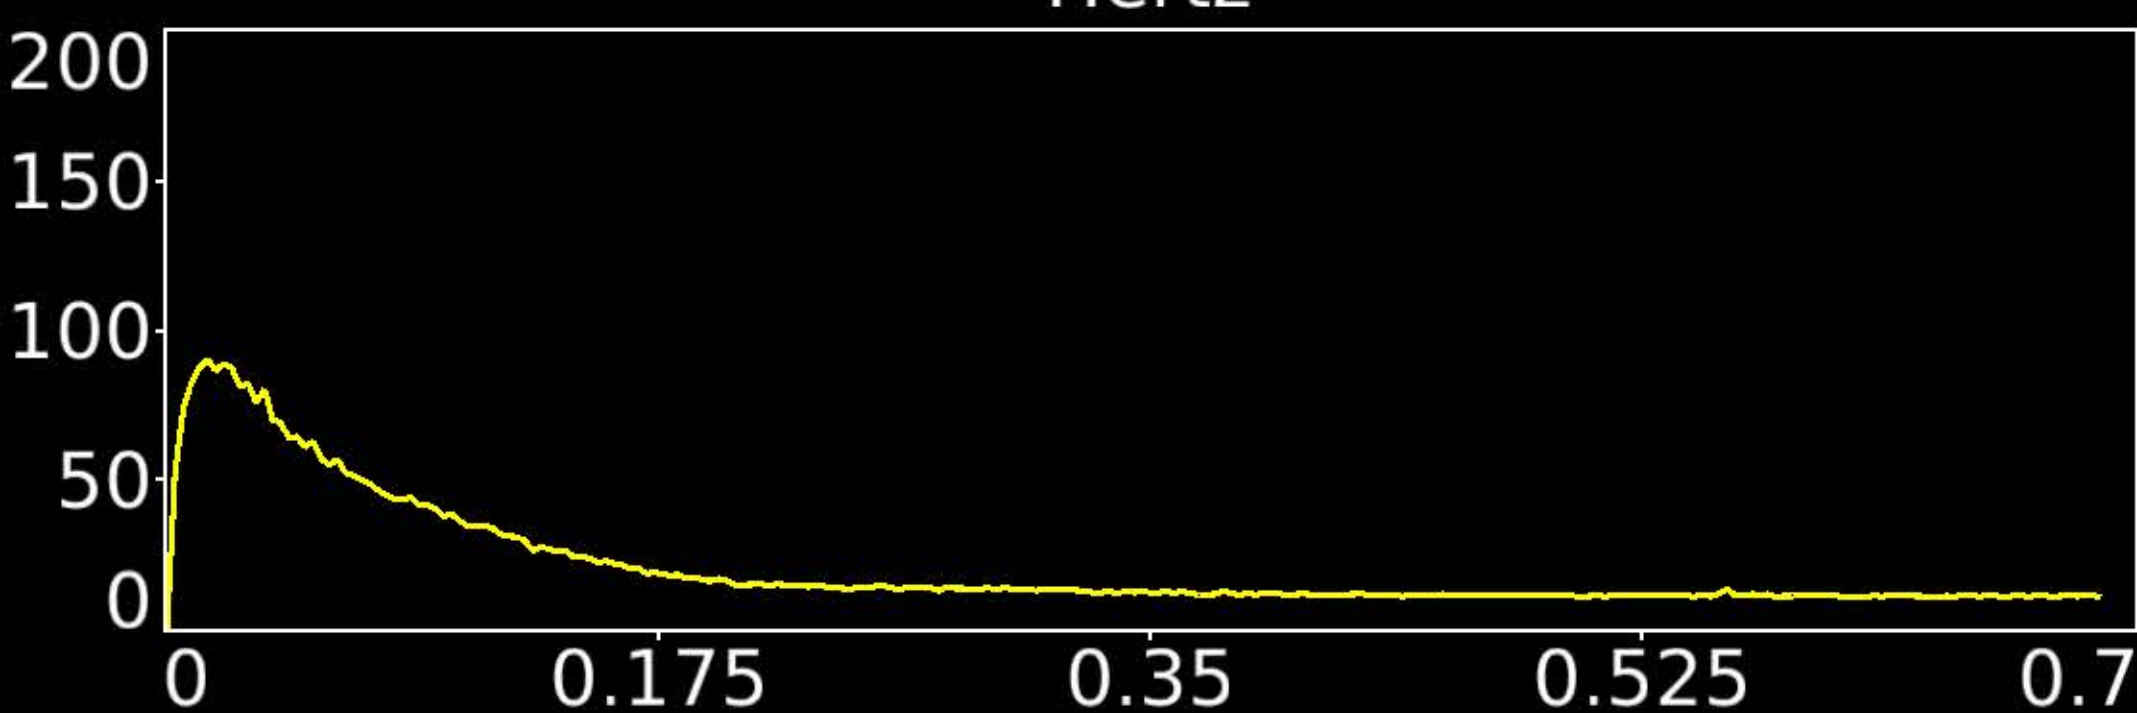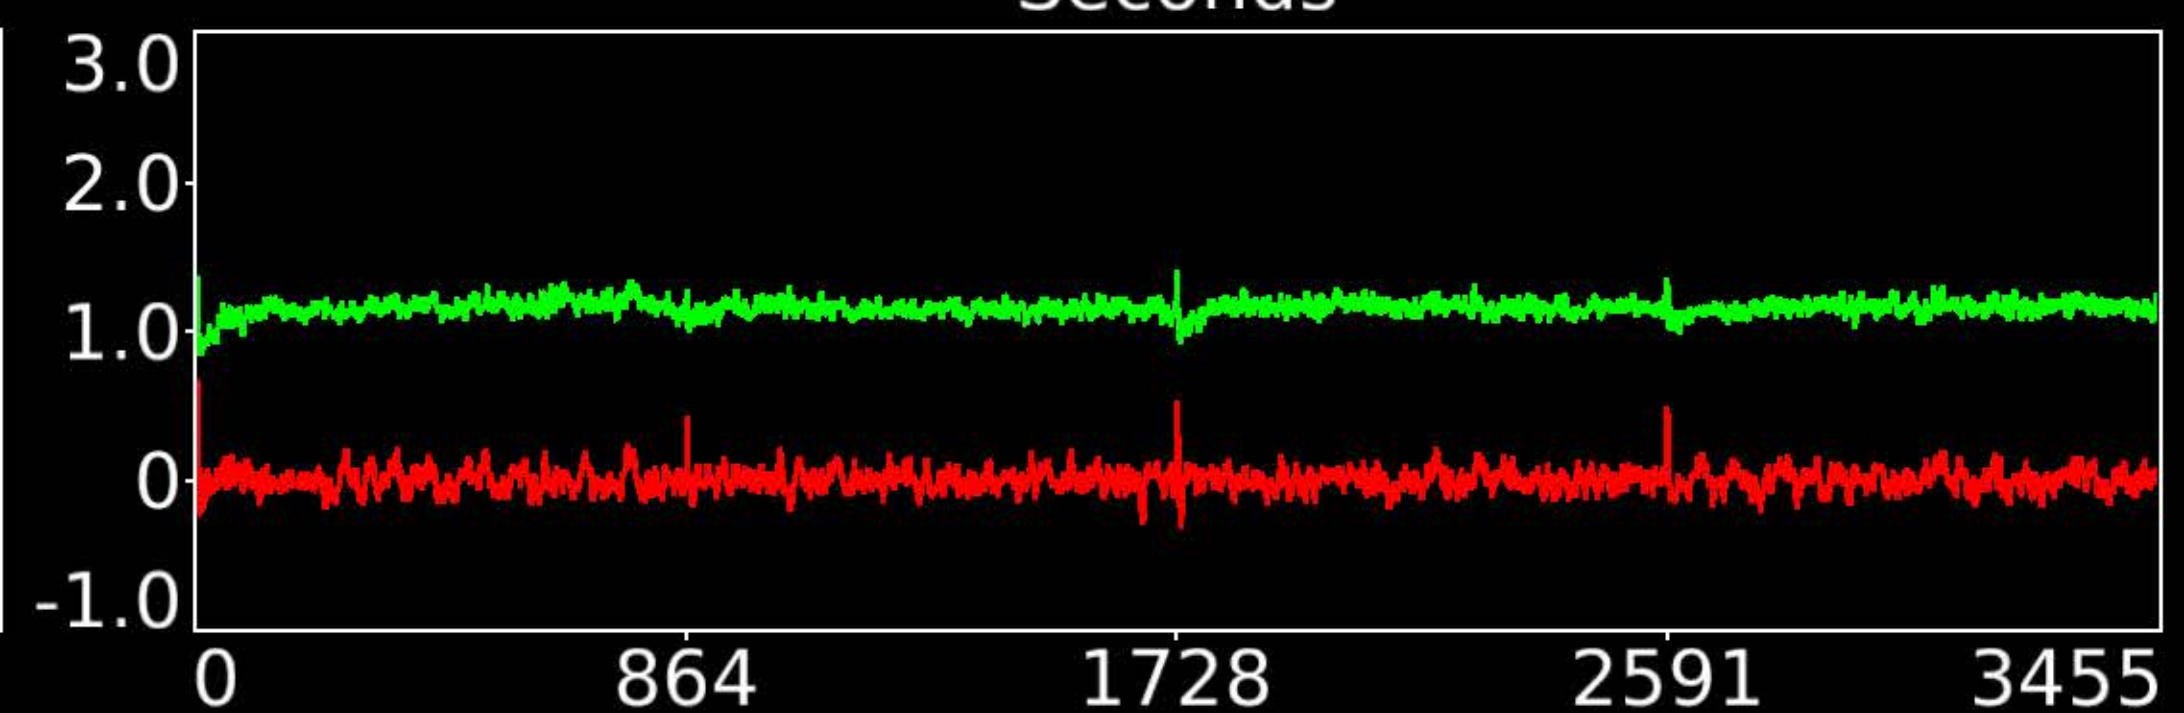

|                                                                                                                        |                            |                                 |  |
|------------------------------------------------------------------------------------------------------------------------|----------------------------|---------------------------------|--|
| Number & Class: 13 Signal                                                                                              |                            | Name: Cingulo-Opercular Network |  |
| RVT Correlated: No                                                                                                     | DVARS Dip Associated: No   | Cross-Subject Variable: No      |  |
| Single Subject: No                                                                                                     | % Variance Explained: 2.15 | Globality Index: 0.34           |  |
| Task Component: 10                                                                                                     | Taskr Component: 9         | Sleep Noted: No                 |  |
| Rationale: Spatial map includes positive and negative patches that respect known RSNs (e.g. Cingulo-Opercular Network) |                            |                                 |  |



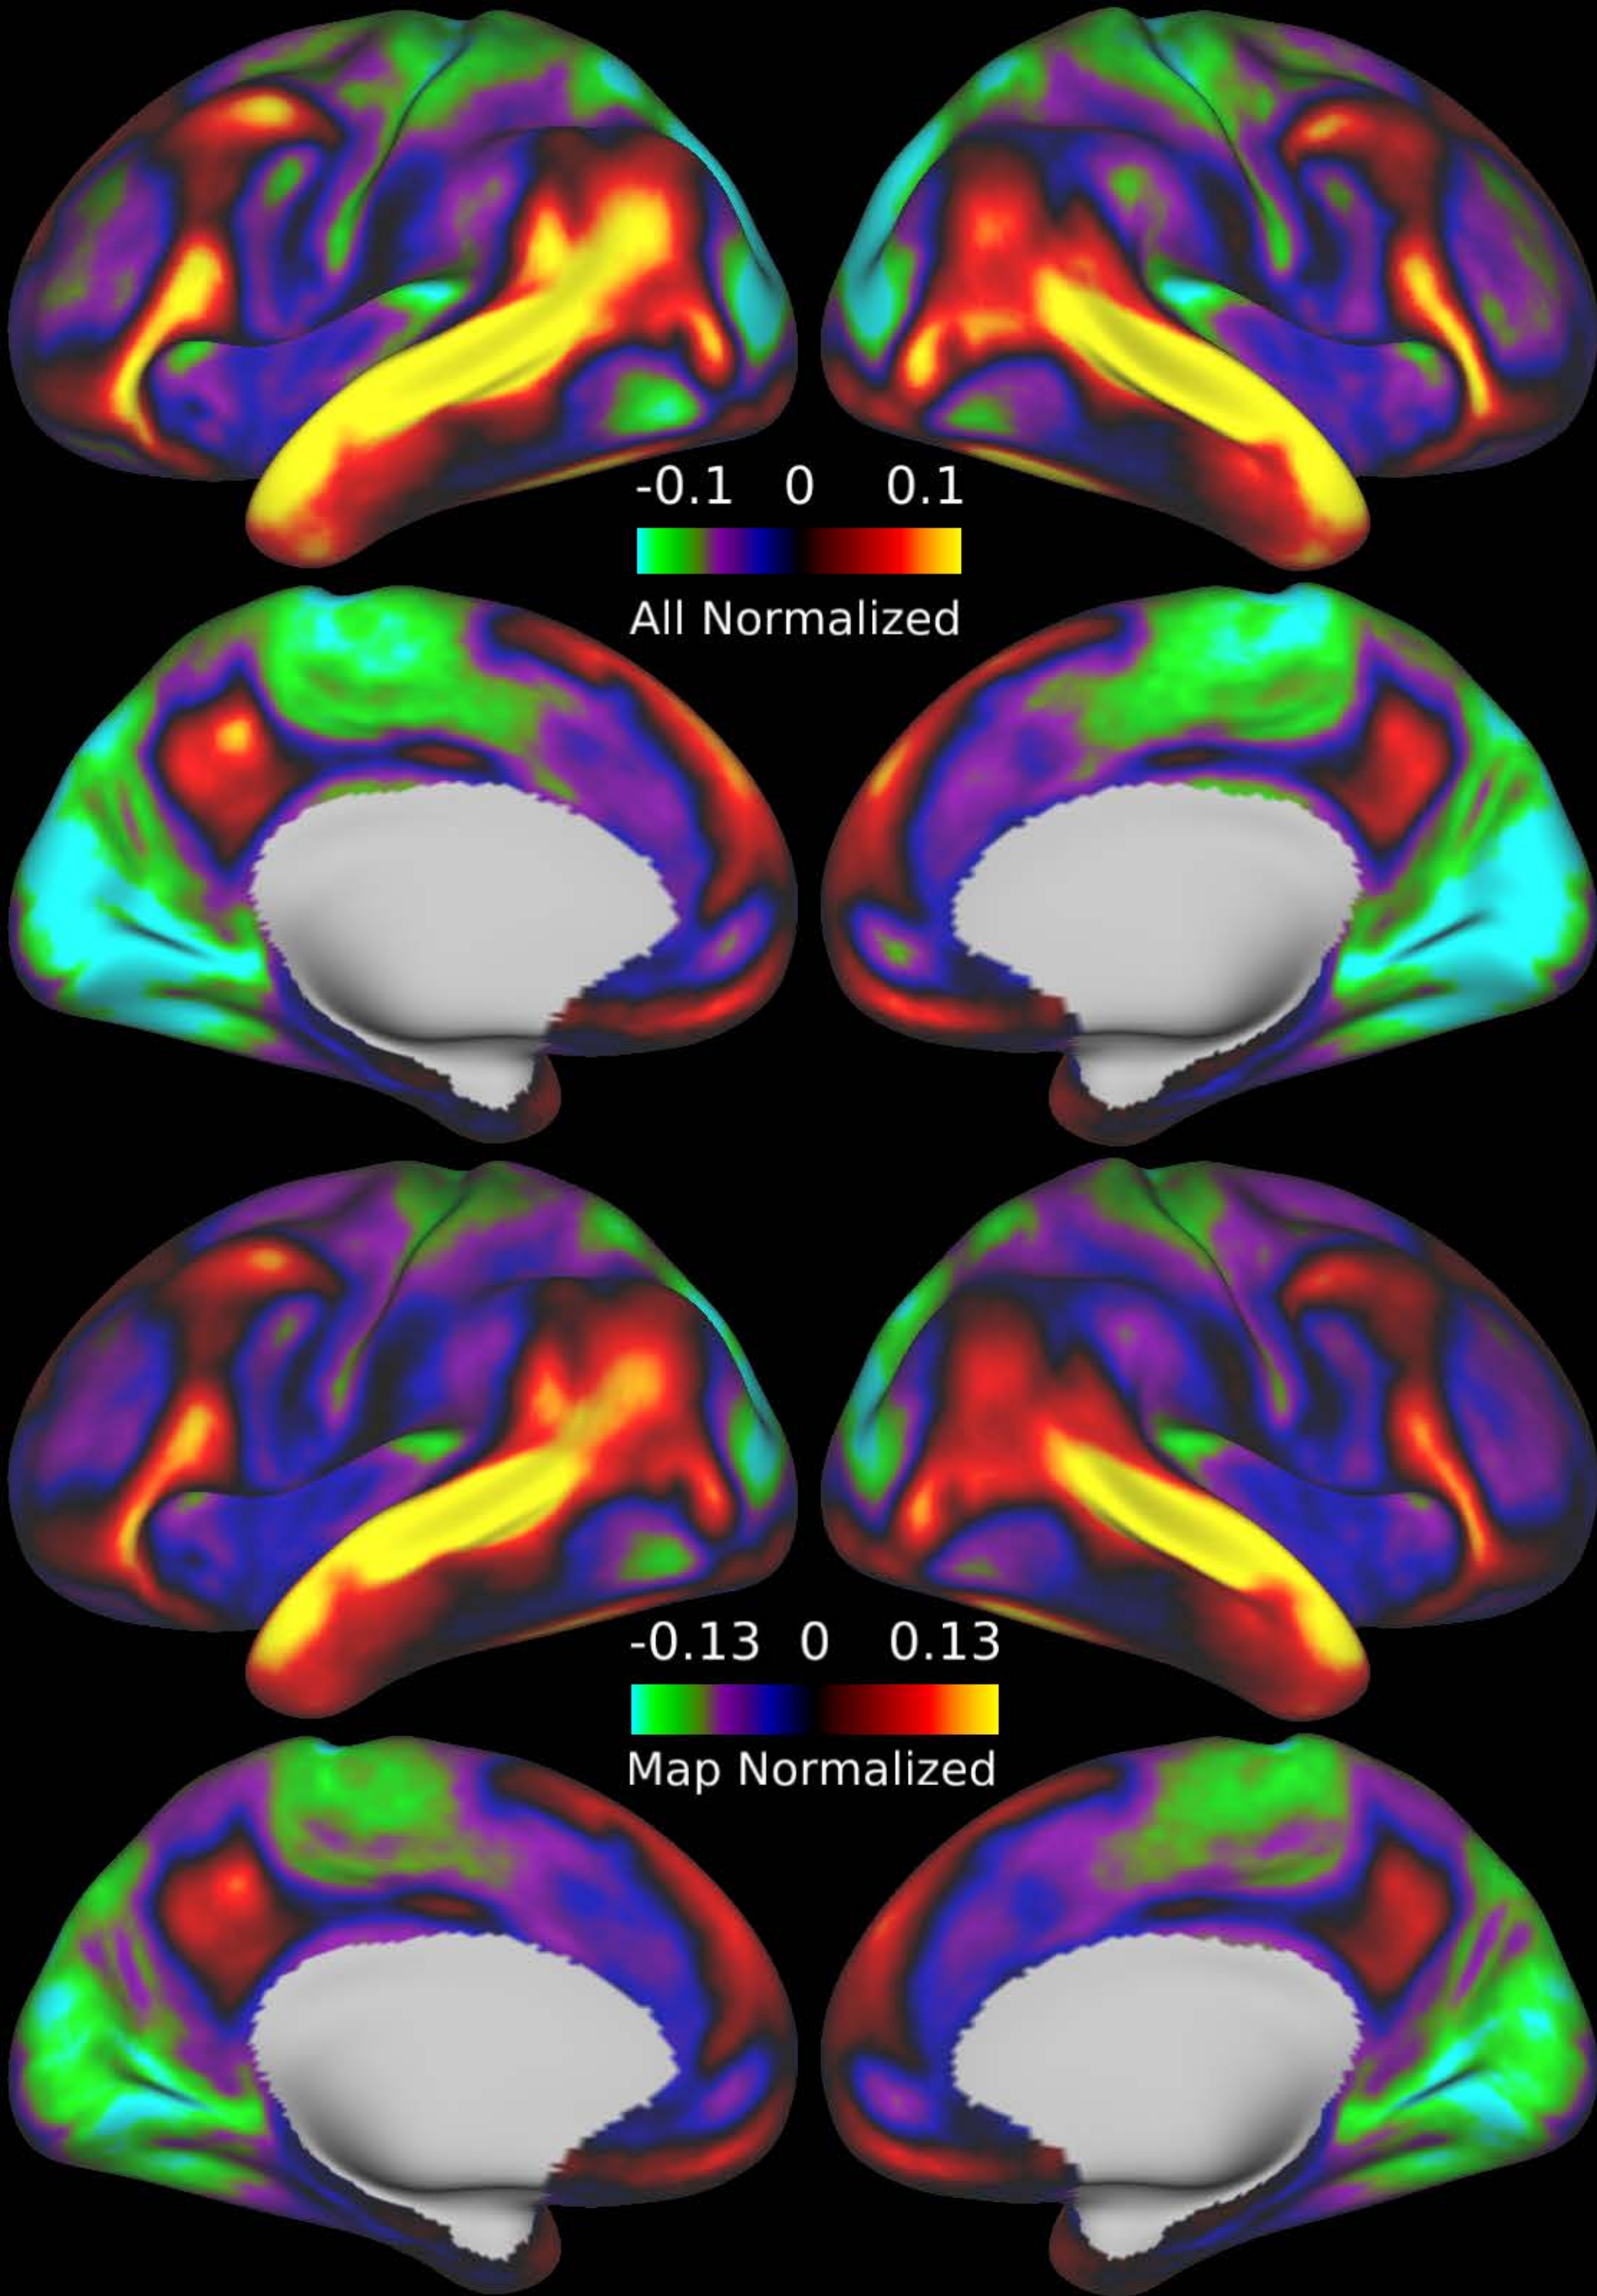

Hertz

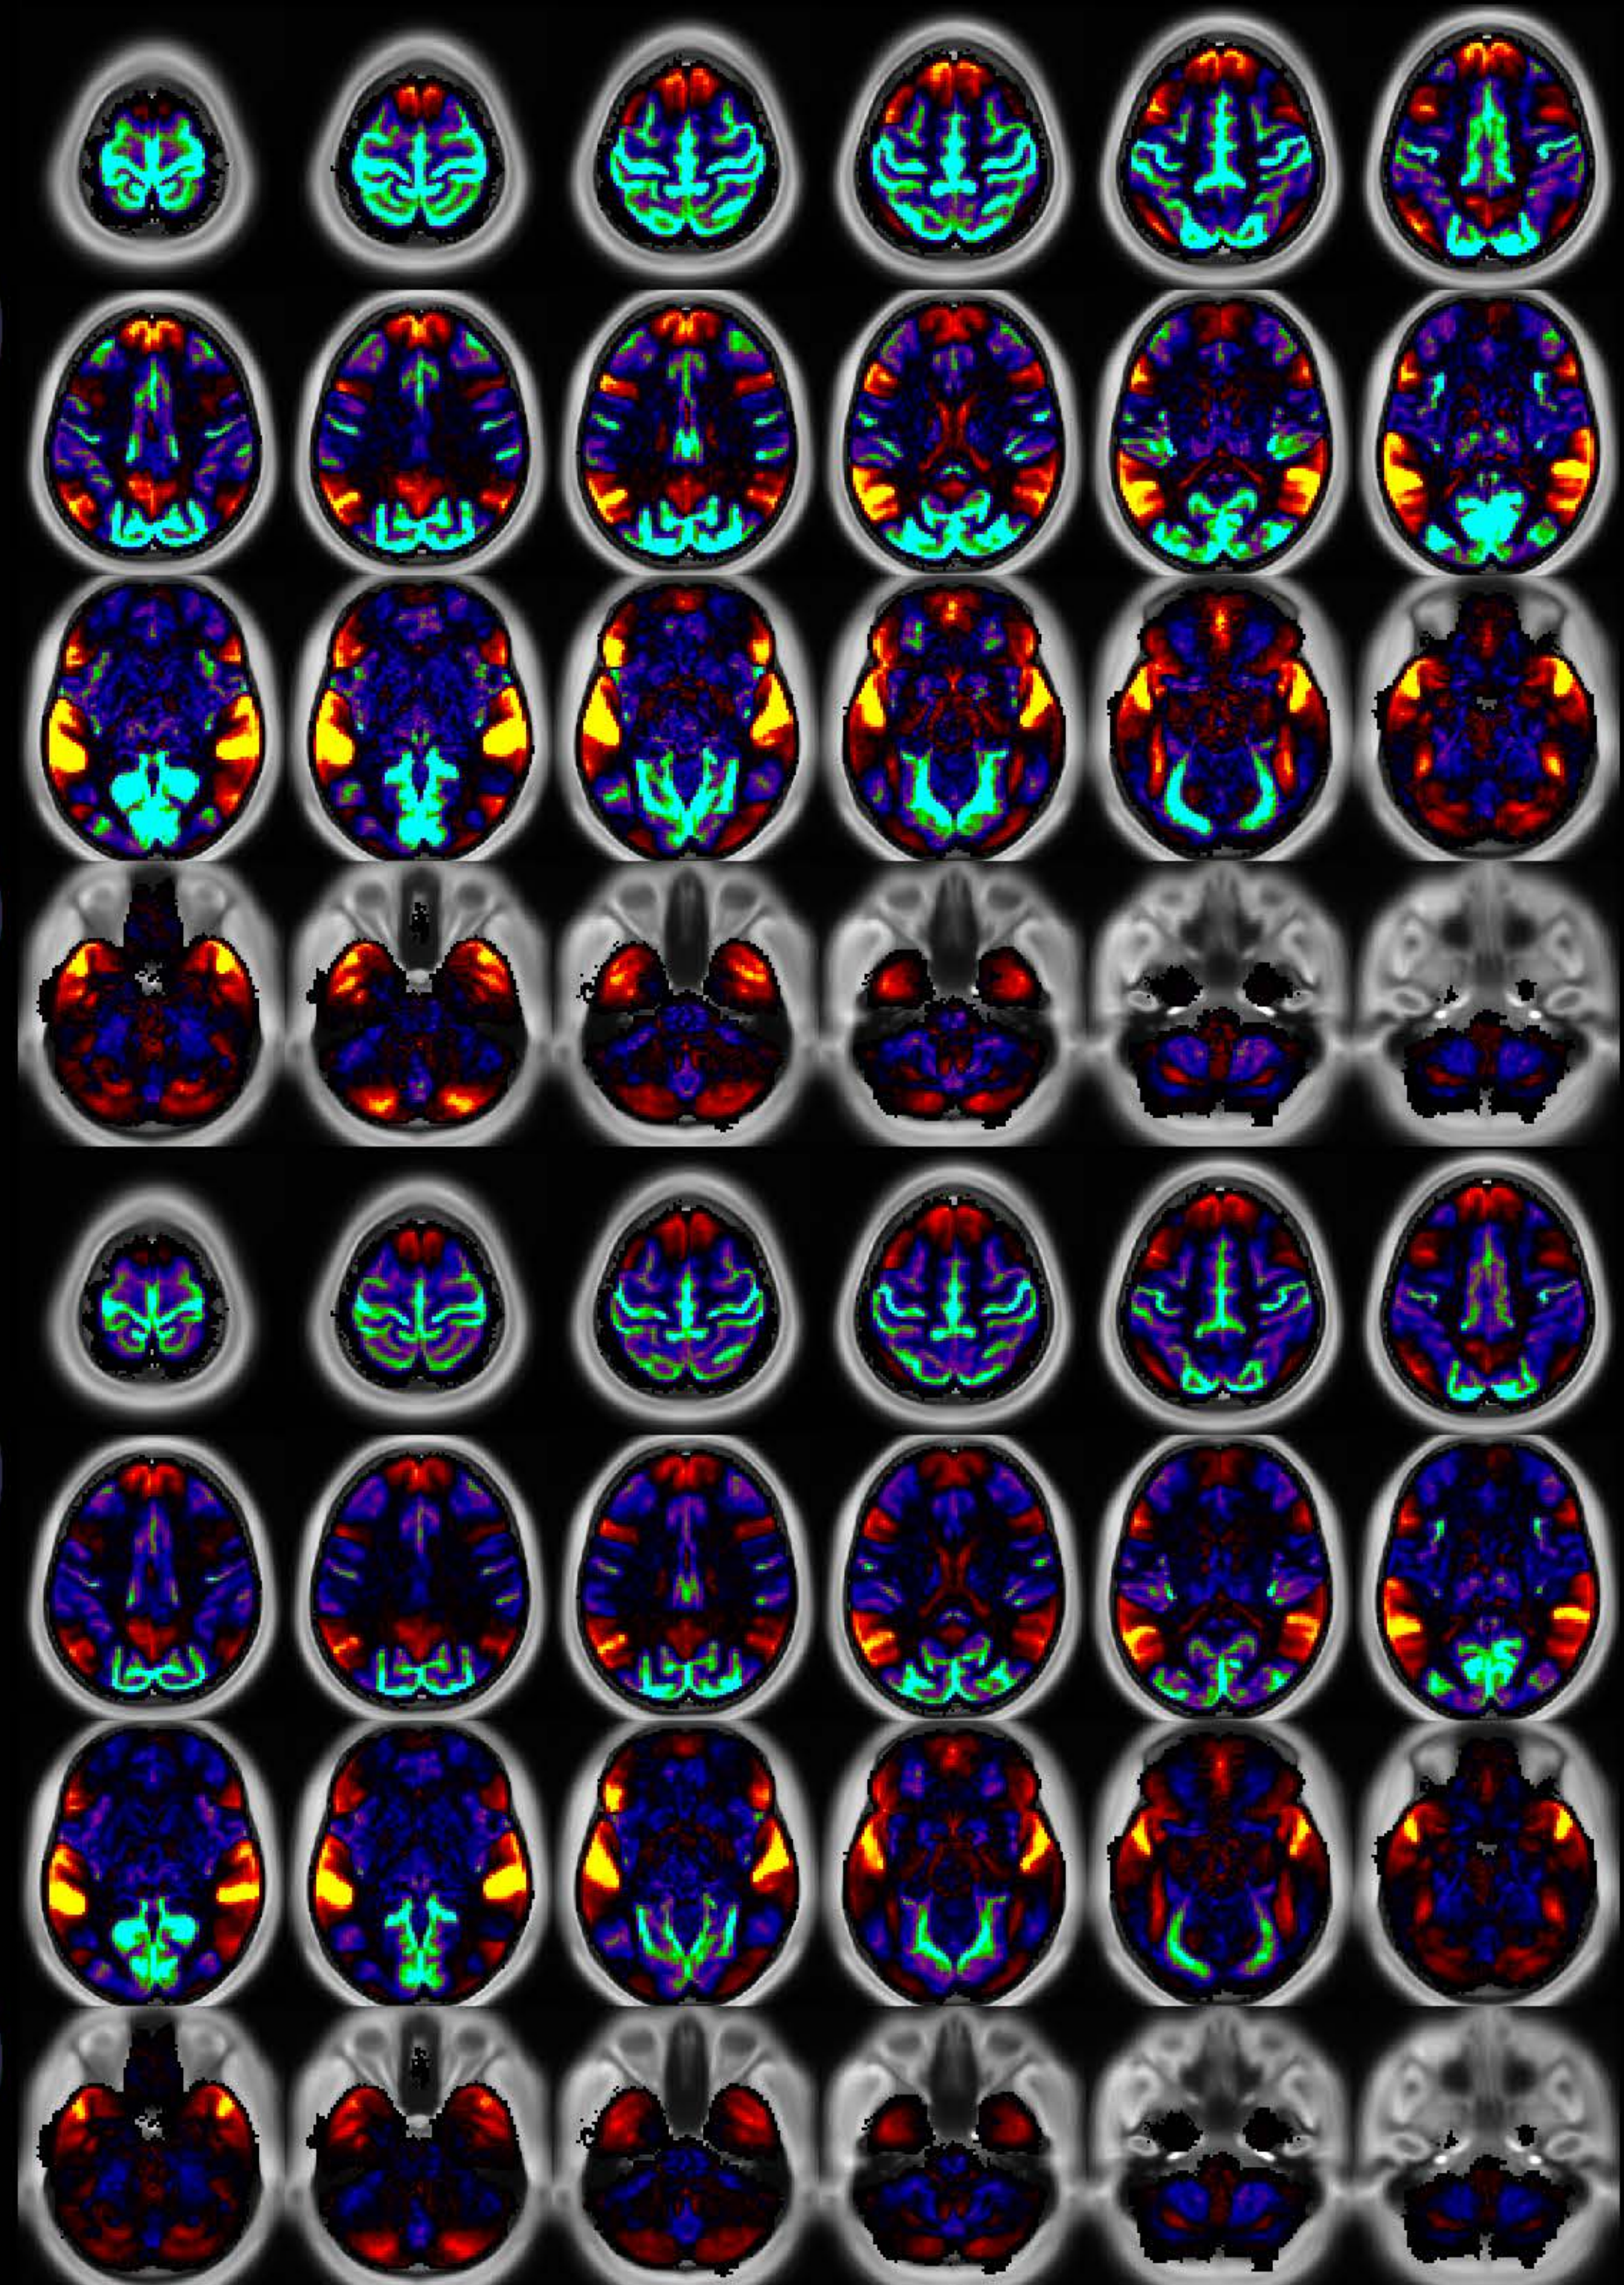

Seconds

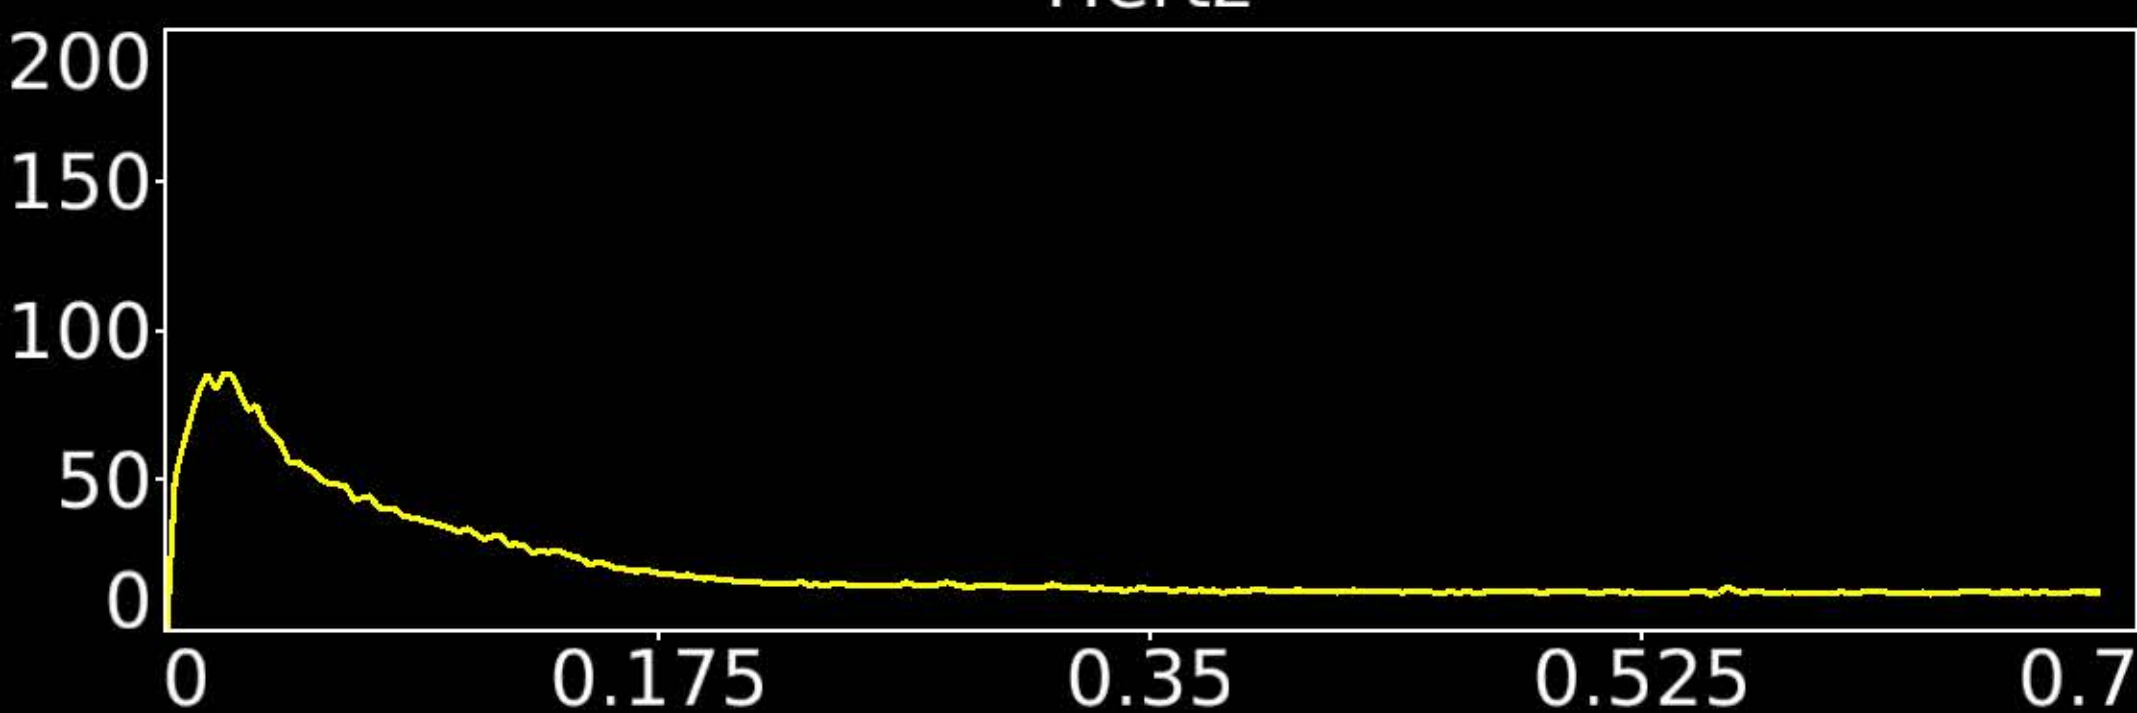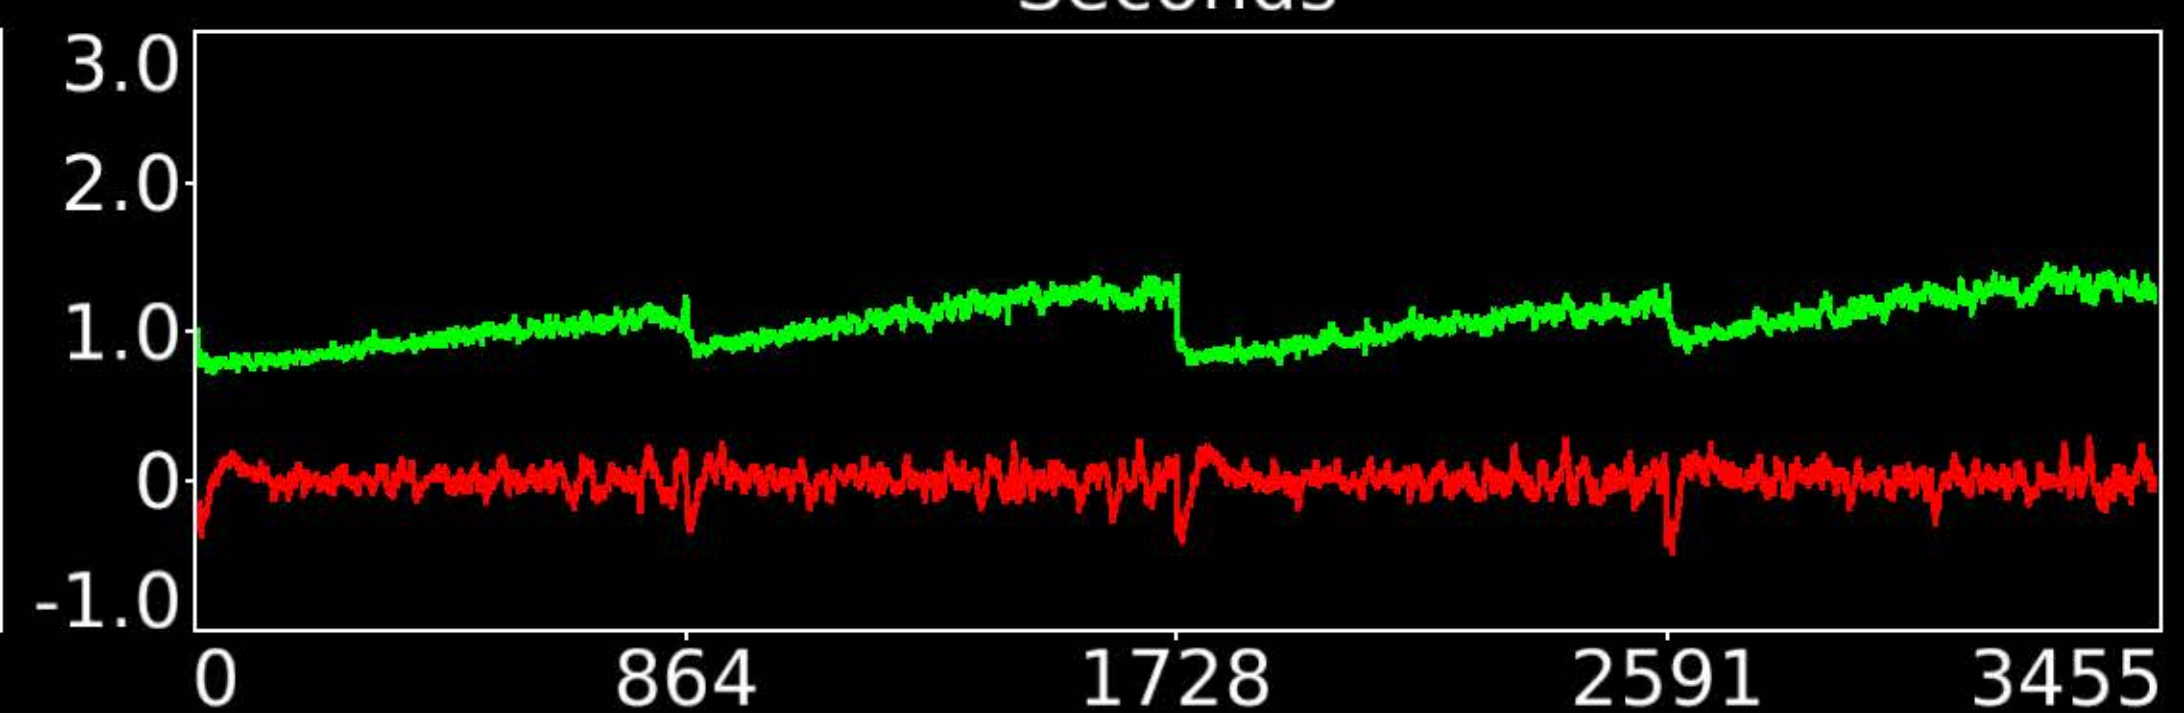

|                           |                            |                                  |  |
|---------------------------|----------------------------|----------------------------------|--|
| Number & Class: 14 Signal |                            | Name: Subsidiary Sleep Component |  |
| RVT Correlated: No        | DVARS Dip Associated: No   | Cross-Subject Variable: Yes      |  |
| Single Subject: No        | % Variance Explained: 2.11 | Globality Index: 1.07            |  |
| Task Component: No        | Taskr Component: No        | Sleep Noted: Yes                 |  |

Rationale: Spatial map includes positive and negative patches that respect known RSNs (e.g. Ventral Attention; Language Network) and areal boundaries (44 and 45)



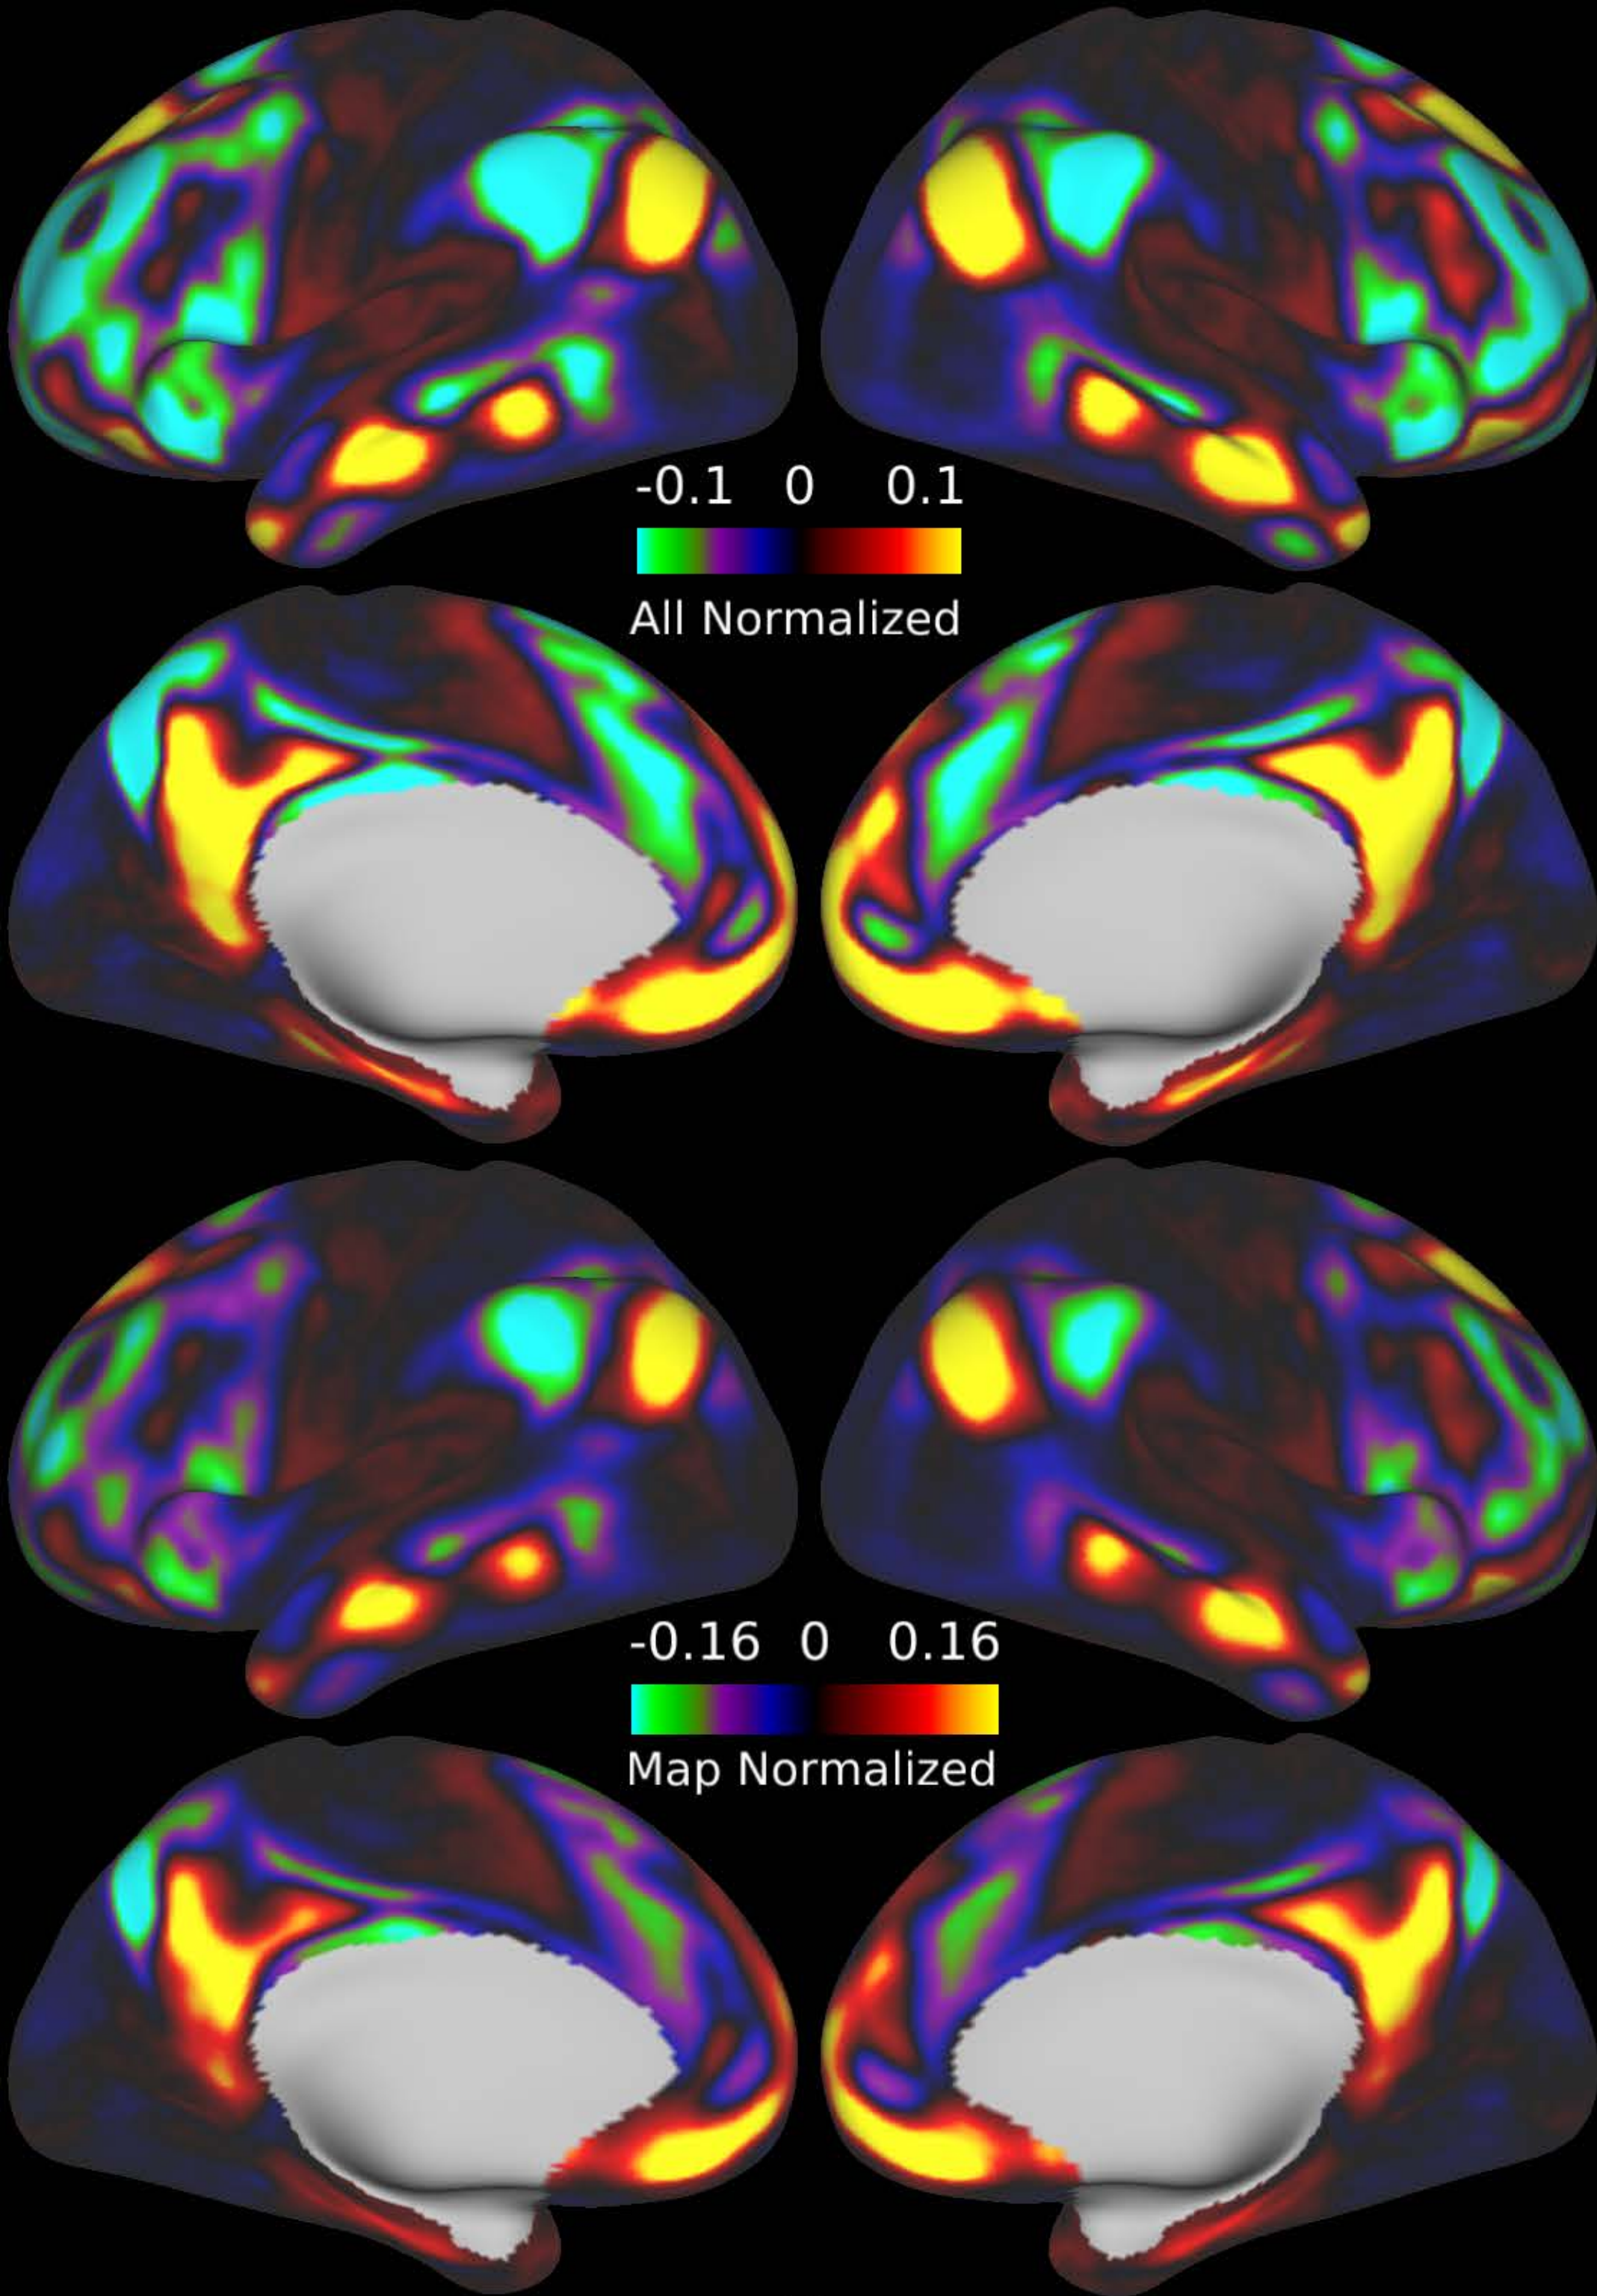

Hertz

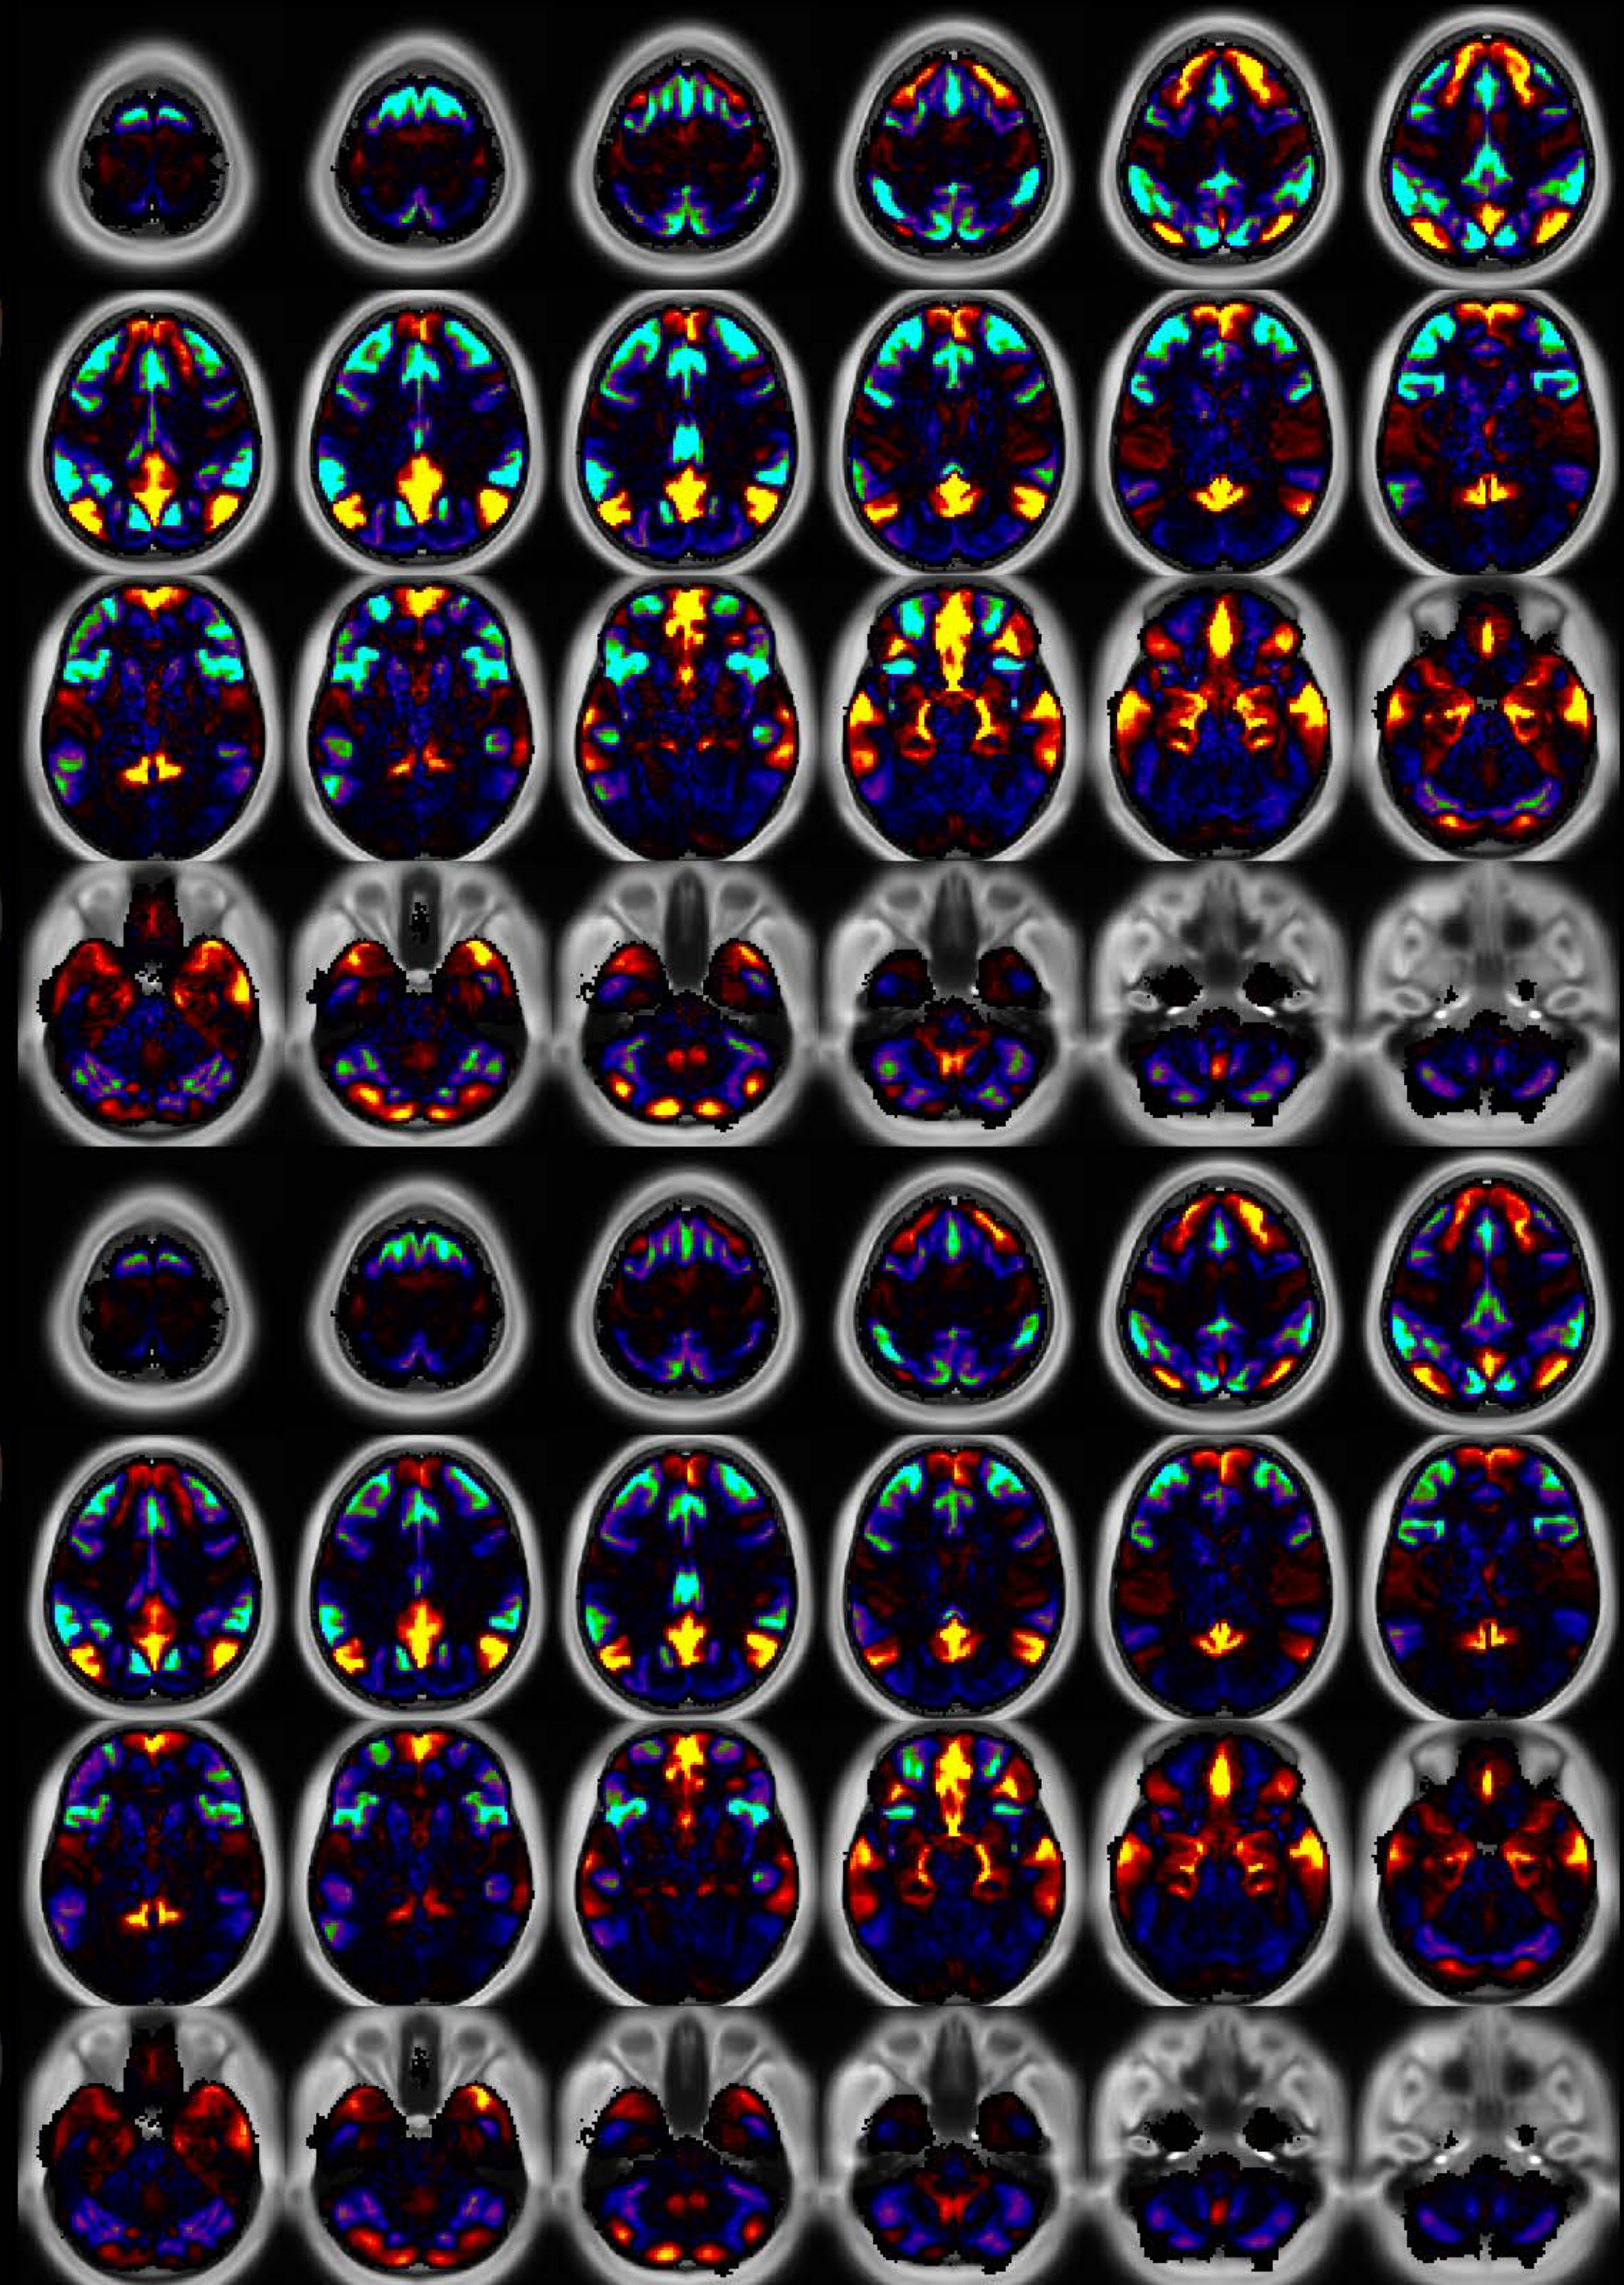

Seconds

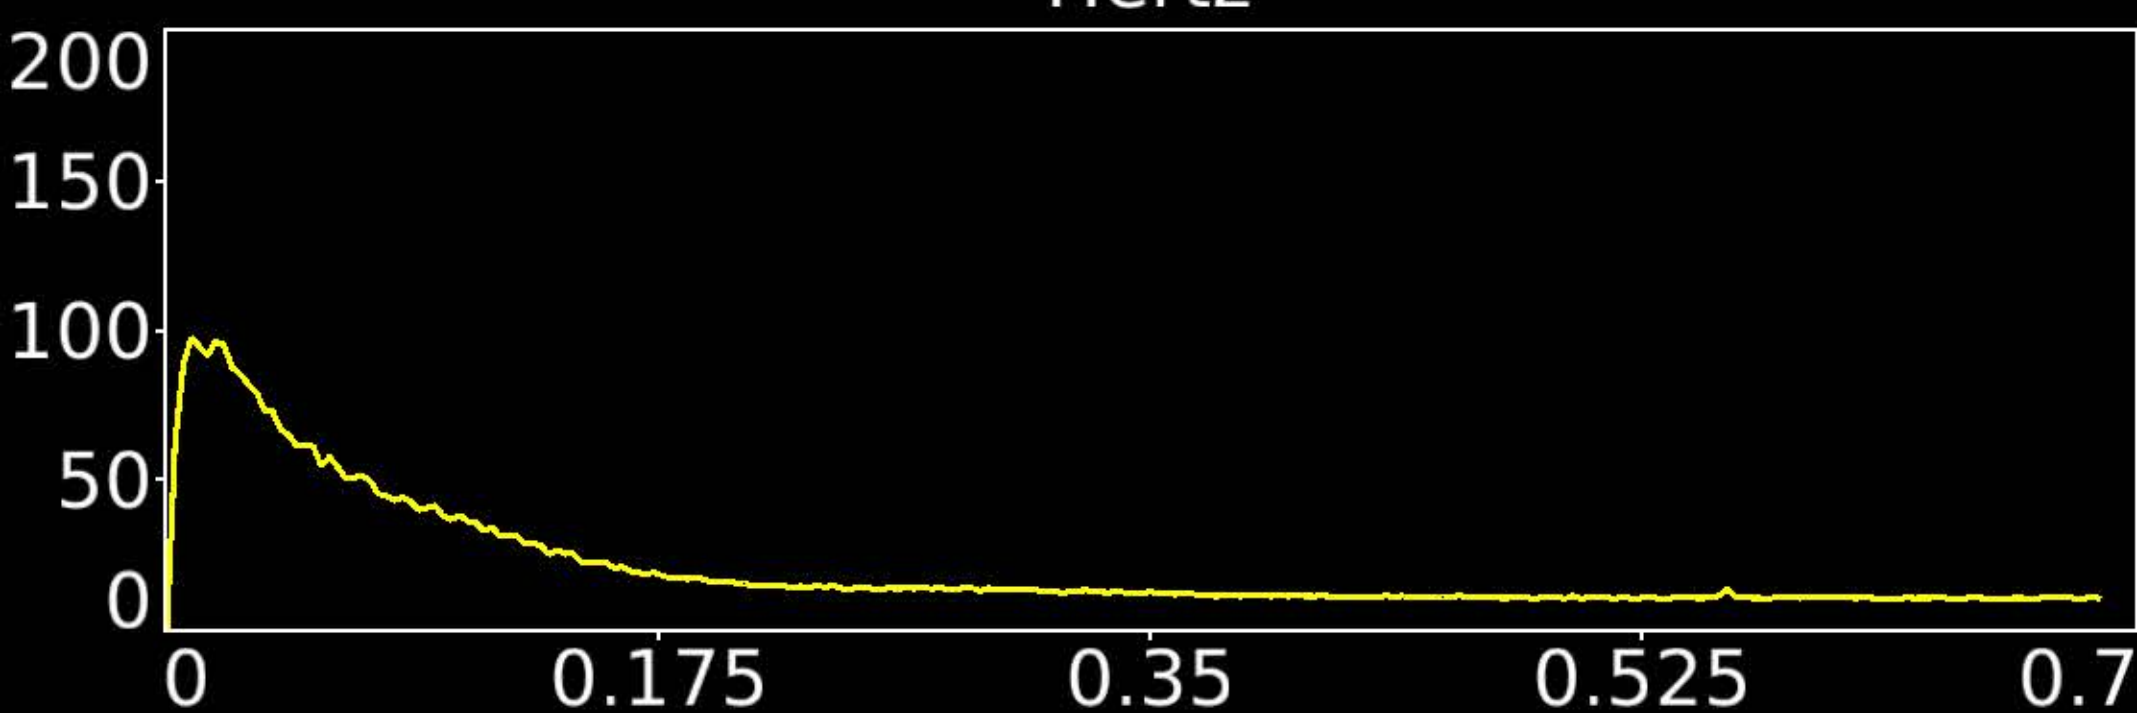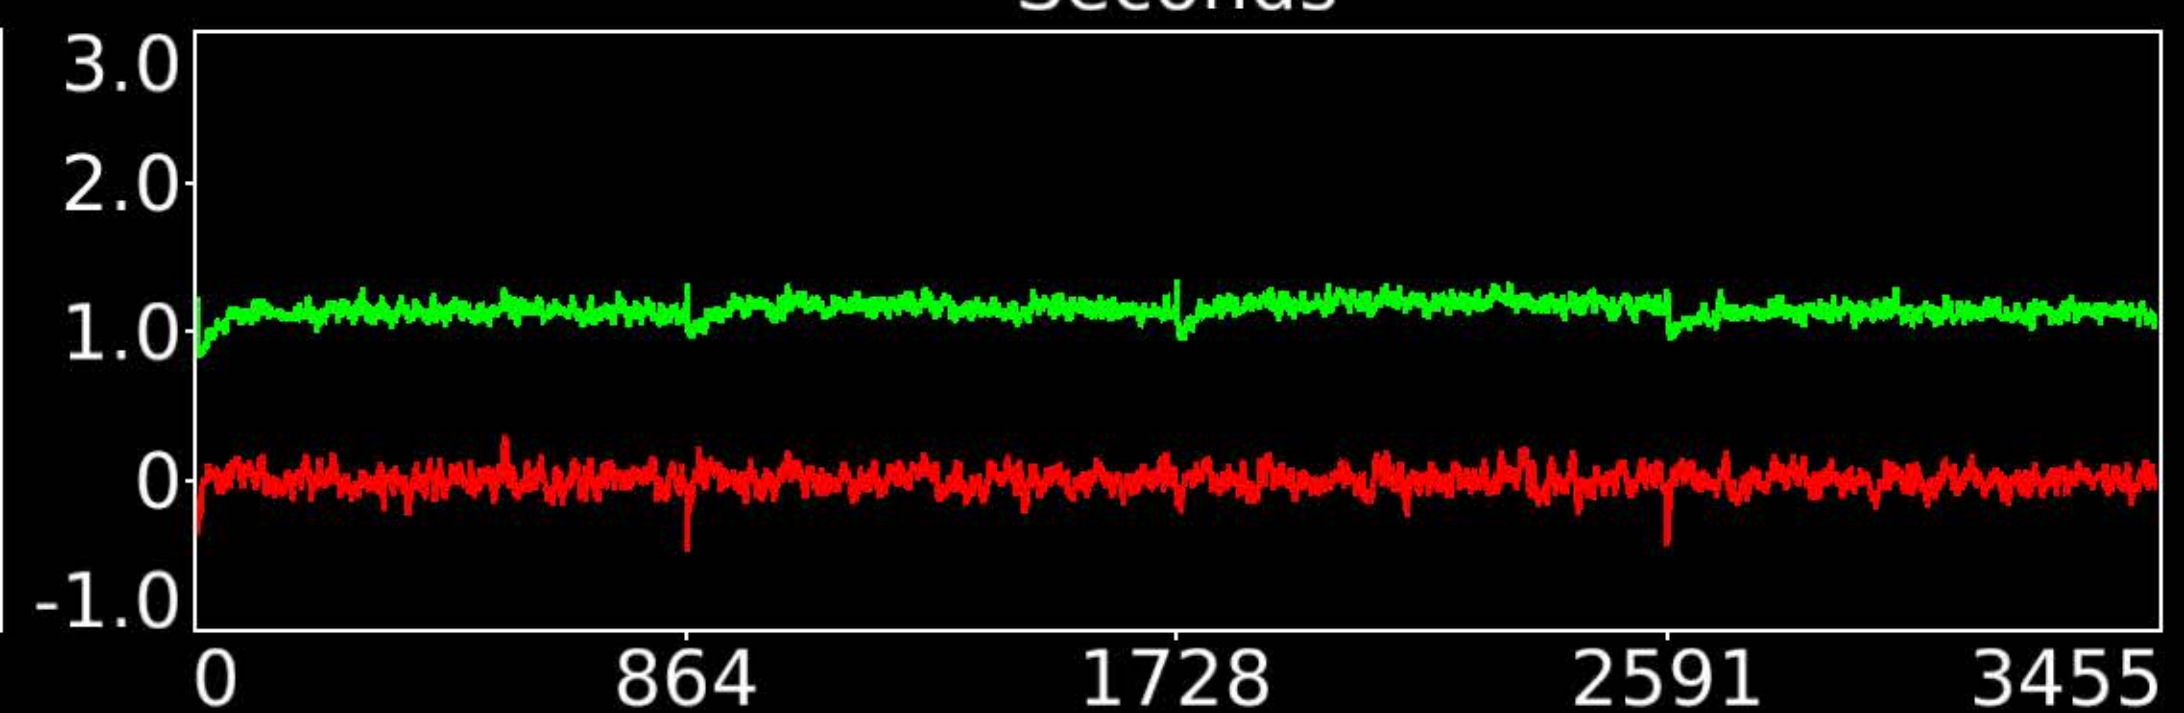

|                           |                            |                                      |  |
|---------------------------|----------------------------|--------------------------------------|--|
| Number & Class: 15 Signal |                            | Name: Task Negative Vs Task Positive |  |
| RVT Correlated: No        | DVARS Dip Associated: No   | Cross-Subject Variable: No           |  |
| Single Subject: No        | % Variance Explained: 2.09 | Globality Index: 0.57                |  |
| Task Component: 26        | Taskr Component: 19        | Sleep Noted: No                      |  |

Rationale: Spatial map includes positive and negative patches that respect known RSNs (e.g. Default Mode Network)



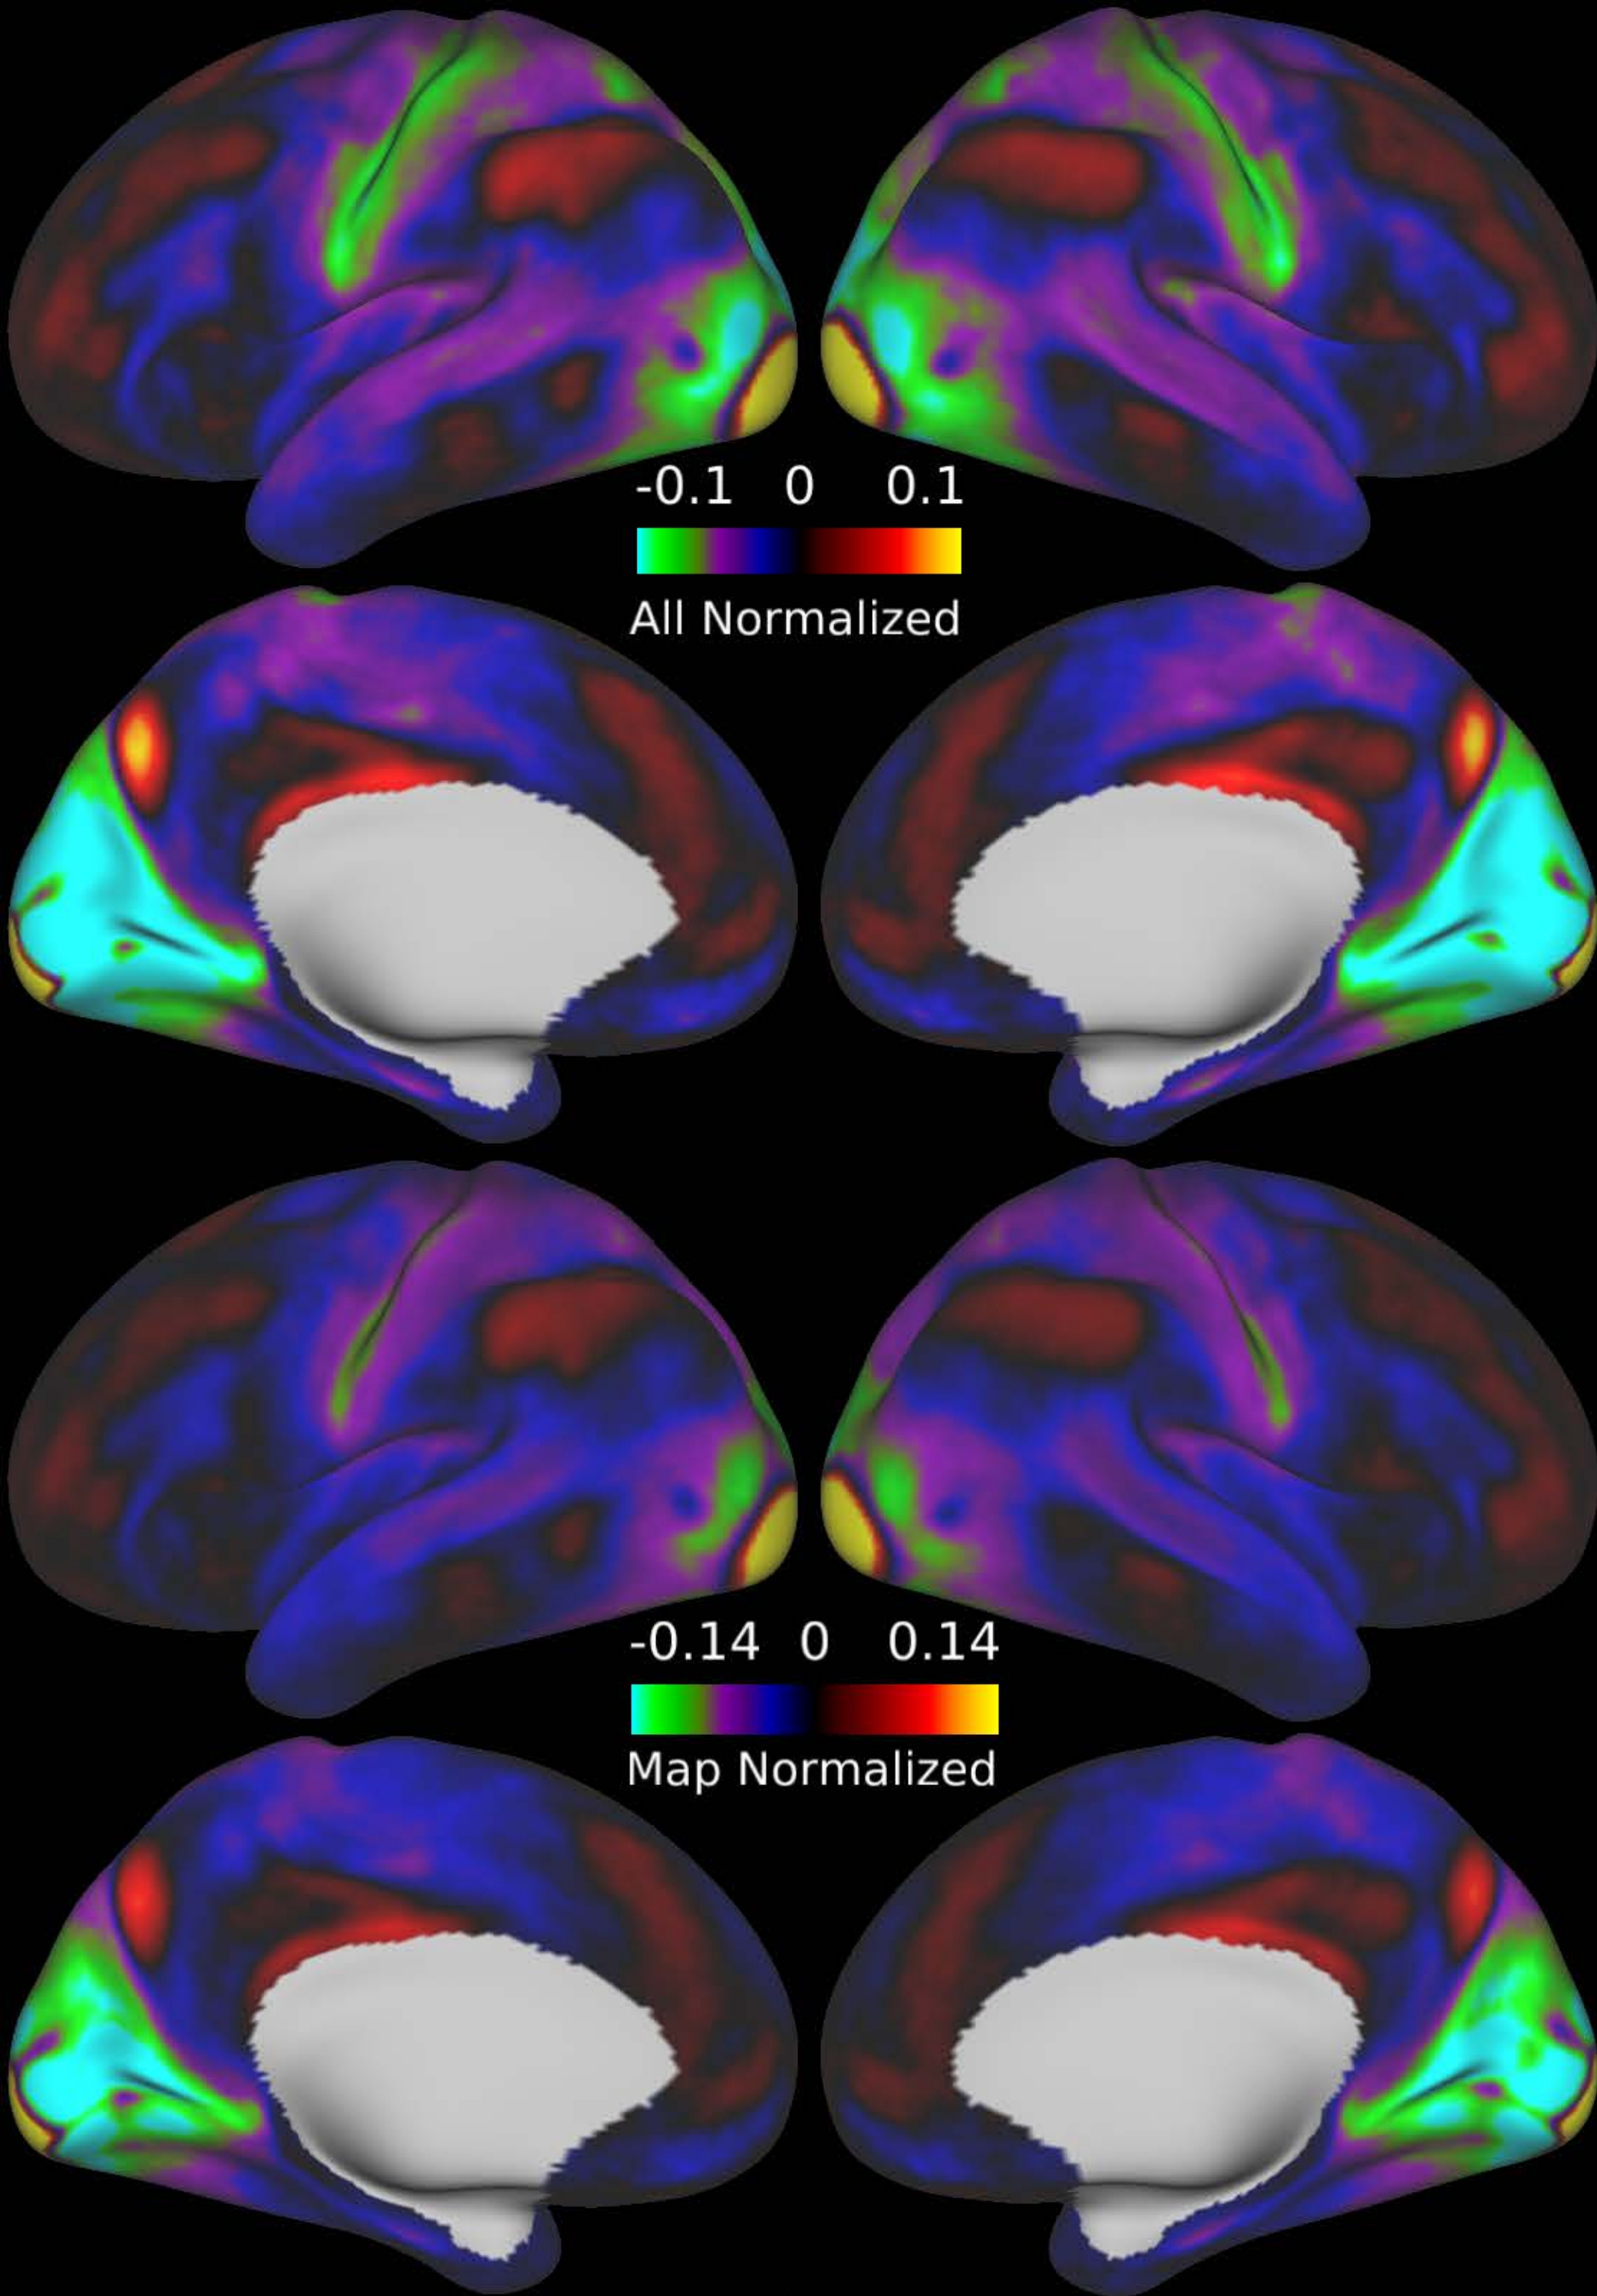

Hertz

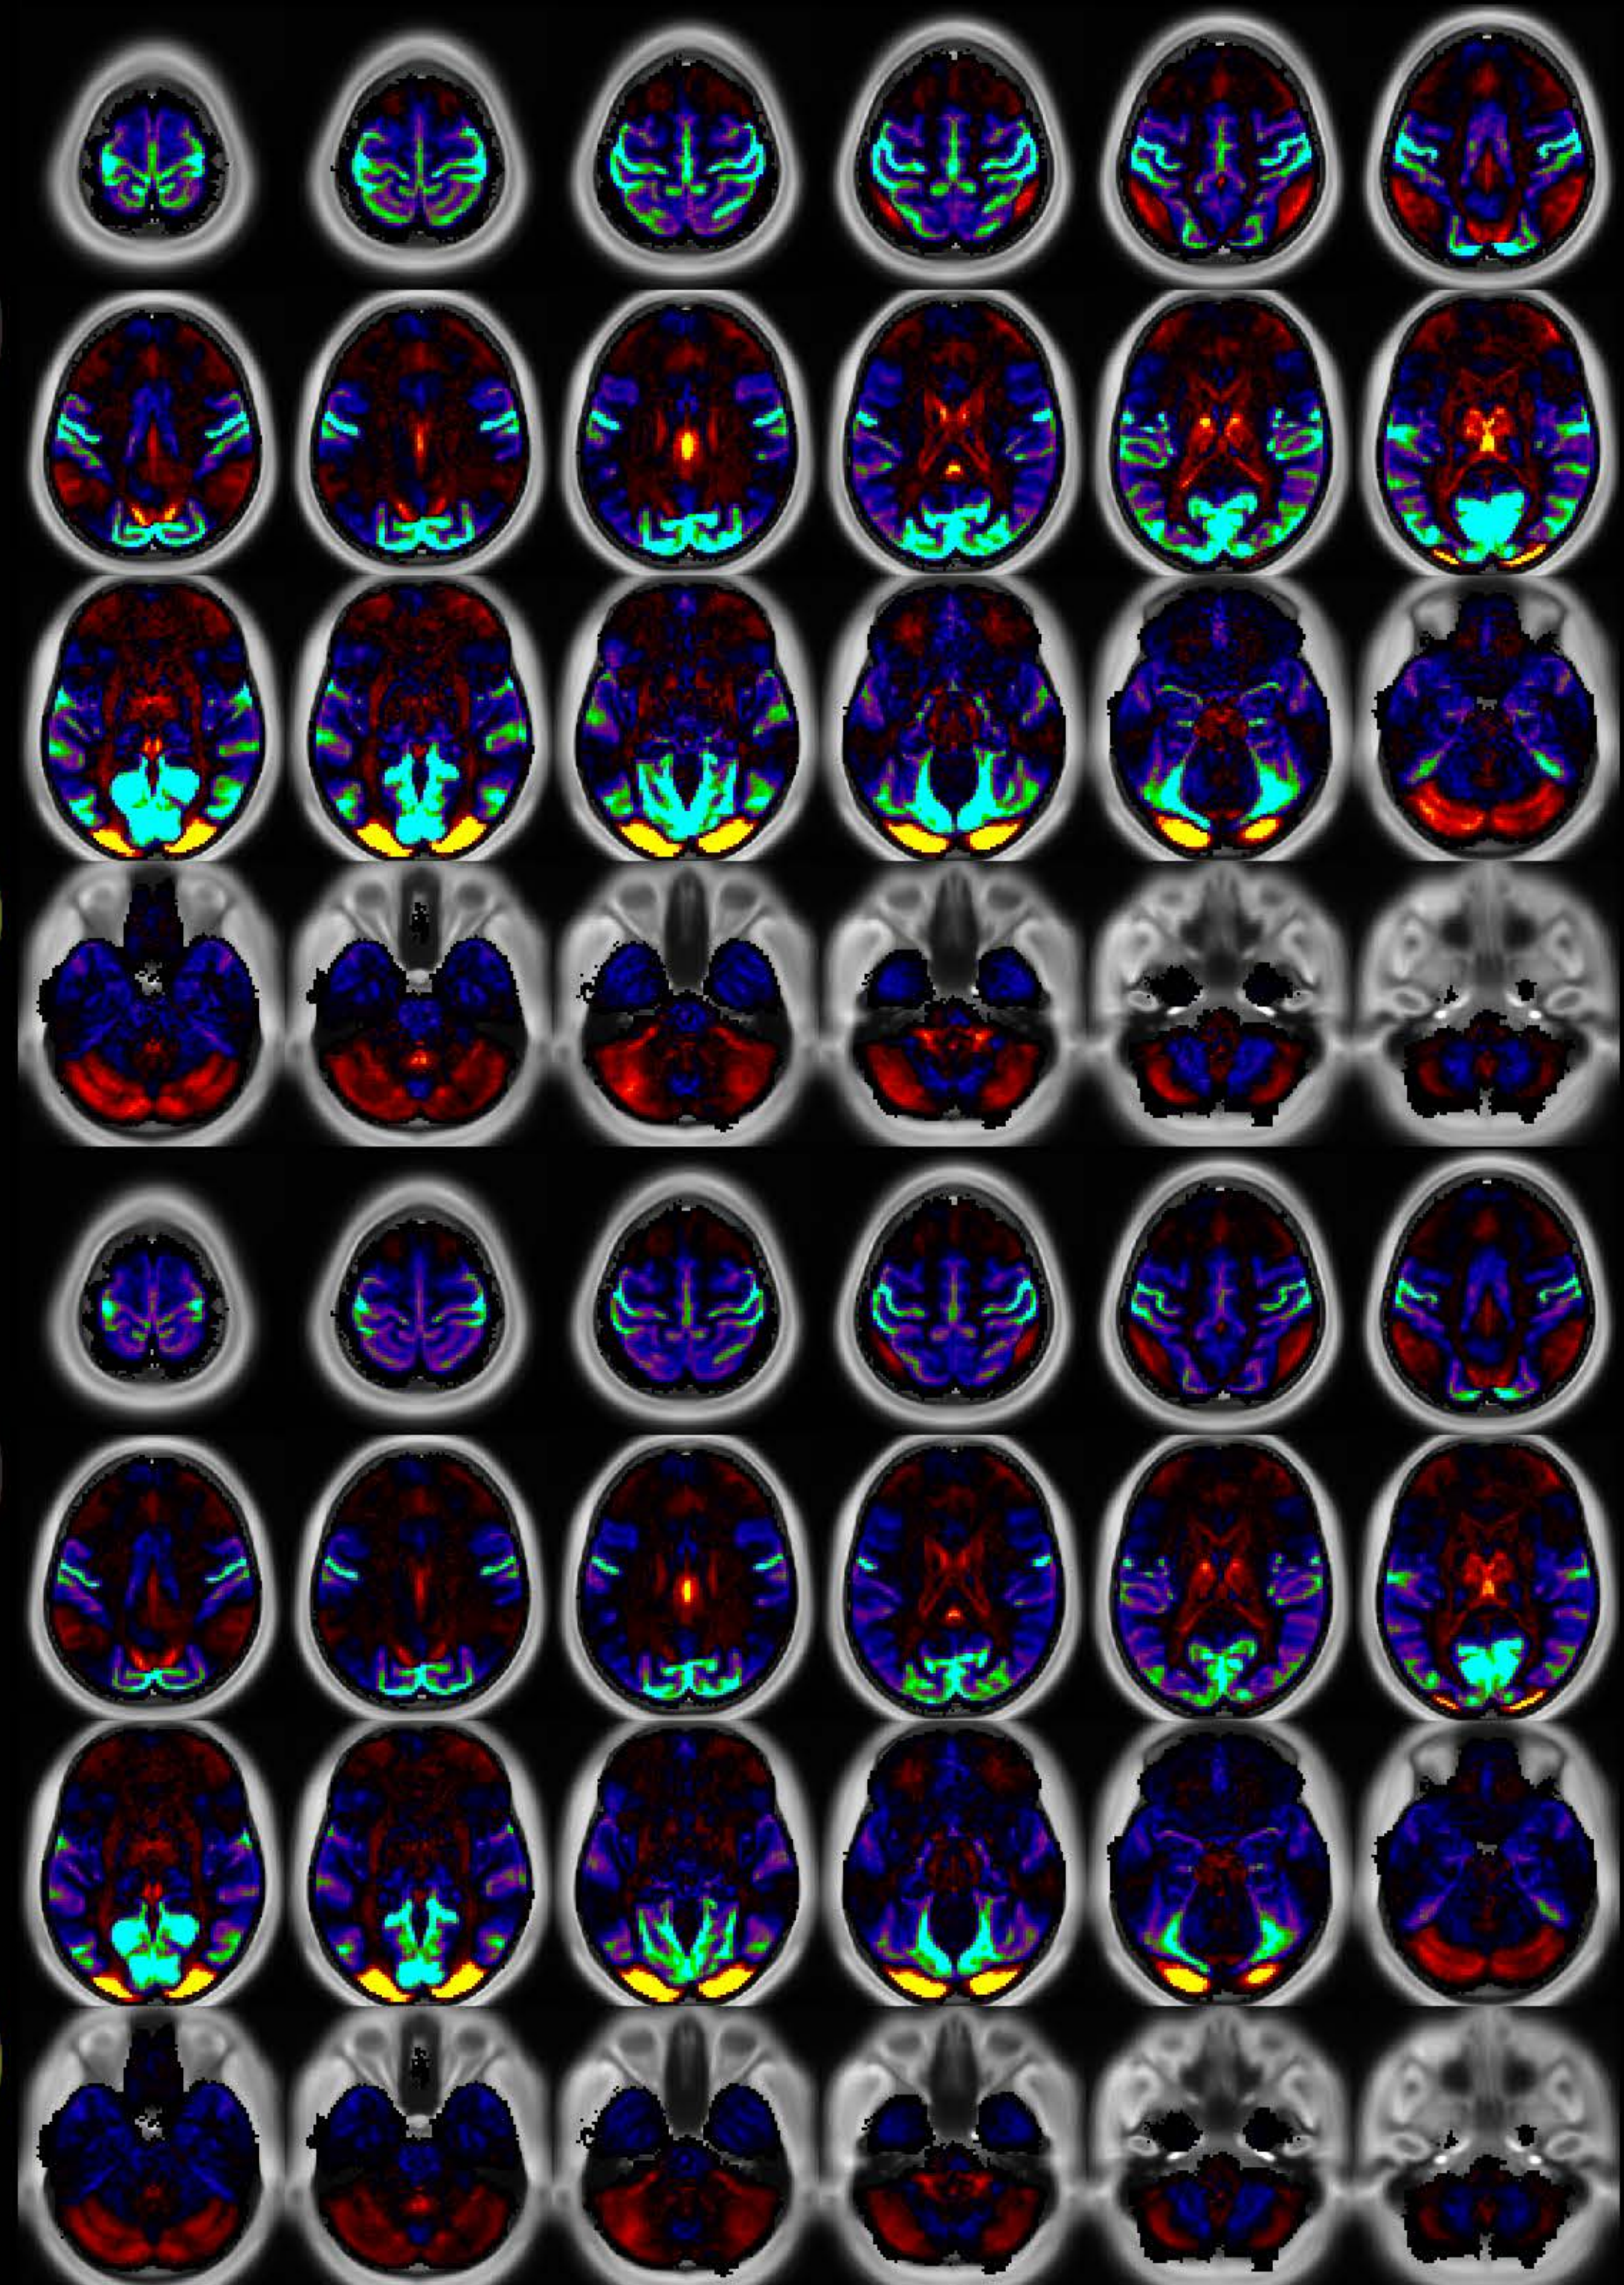

Seconds

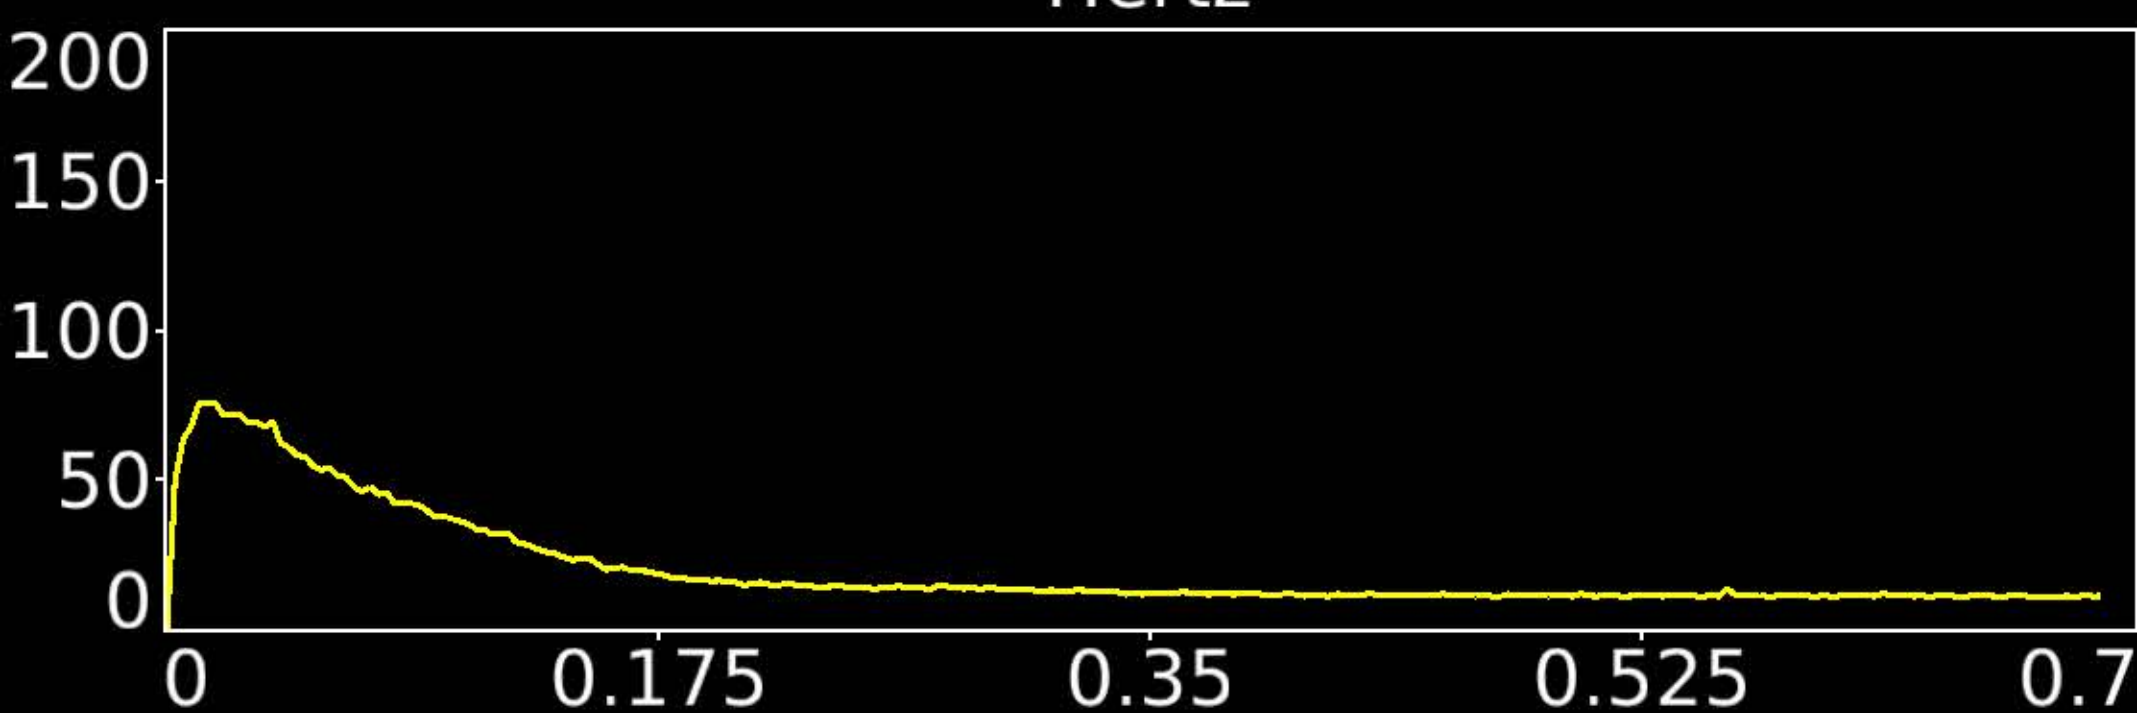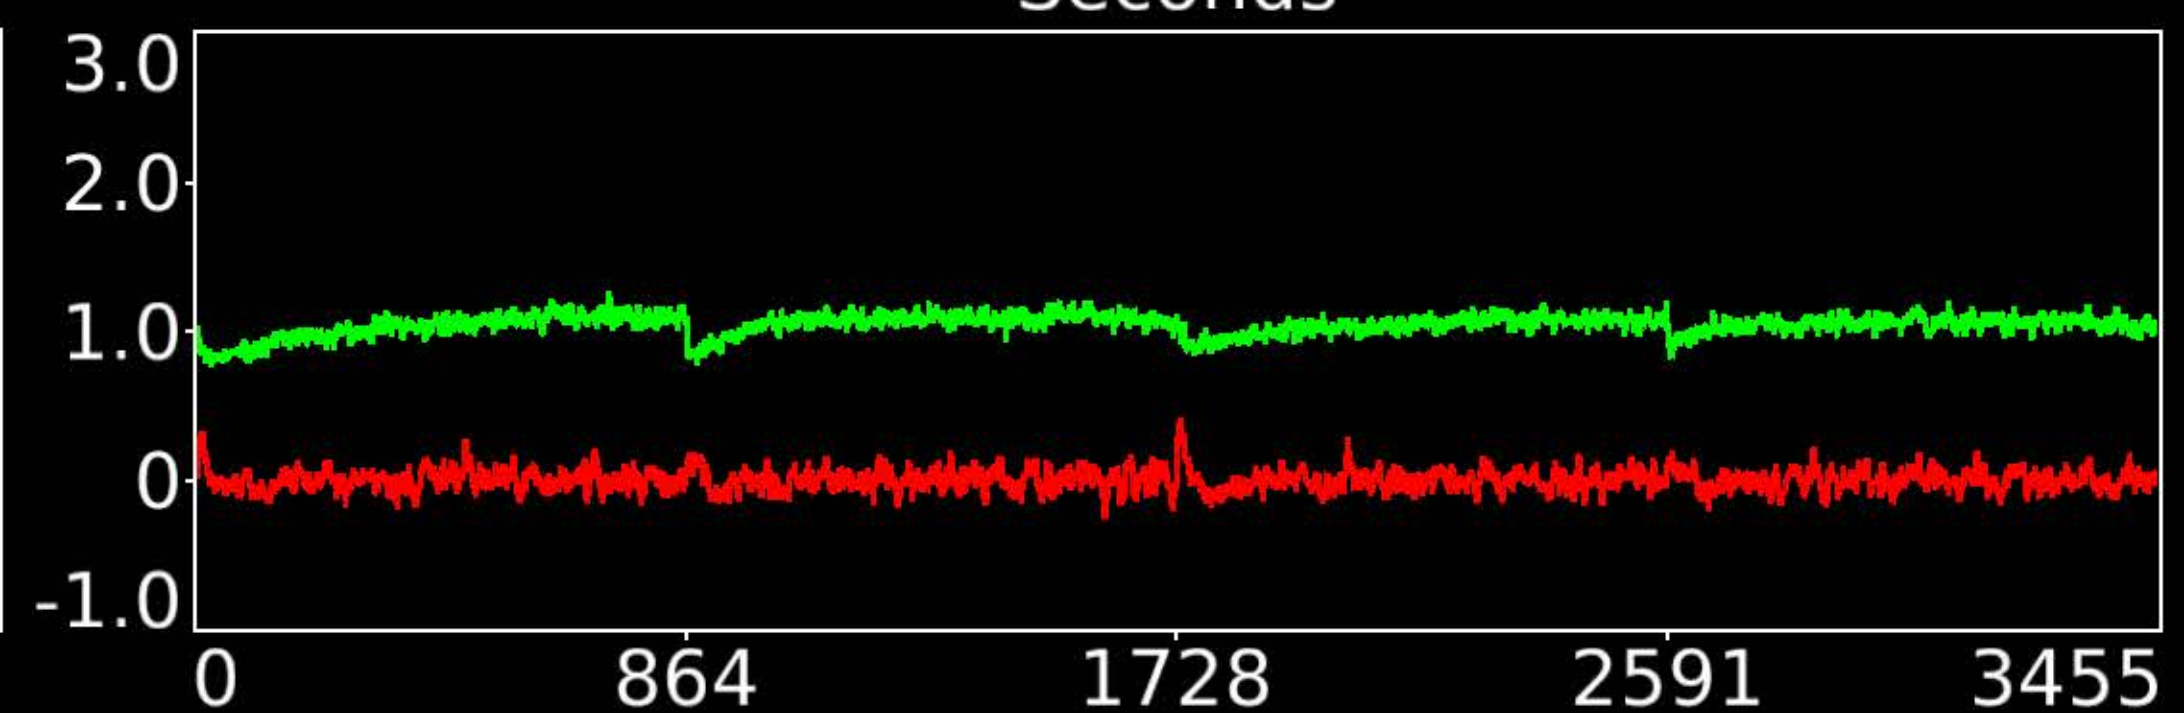

|                           |                            |                                                 |  |
|---------------------------|----------------------------|-------------------------------------------------|--|
| Number & Class: 16 Signal |                            | Name: Foveal > Peripheral Visual (Cross Hairs?) |  |
| RVT Correlated: No        | DVARS Dip Associated: No   | Cross-Subject Variable: Yes                     |  |
| Single Subject: No        | % Variance Explained: 1.71 | Globality Index: 1                              |  |
| Task Component: 17        | Taskr Component: No        | Sleep Noted: No                                 |  |

Rationale: Spatial map includes positive and negative patches that respect known retinotopic visual organization (Foveal vs Peripheral)



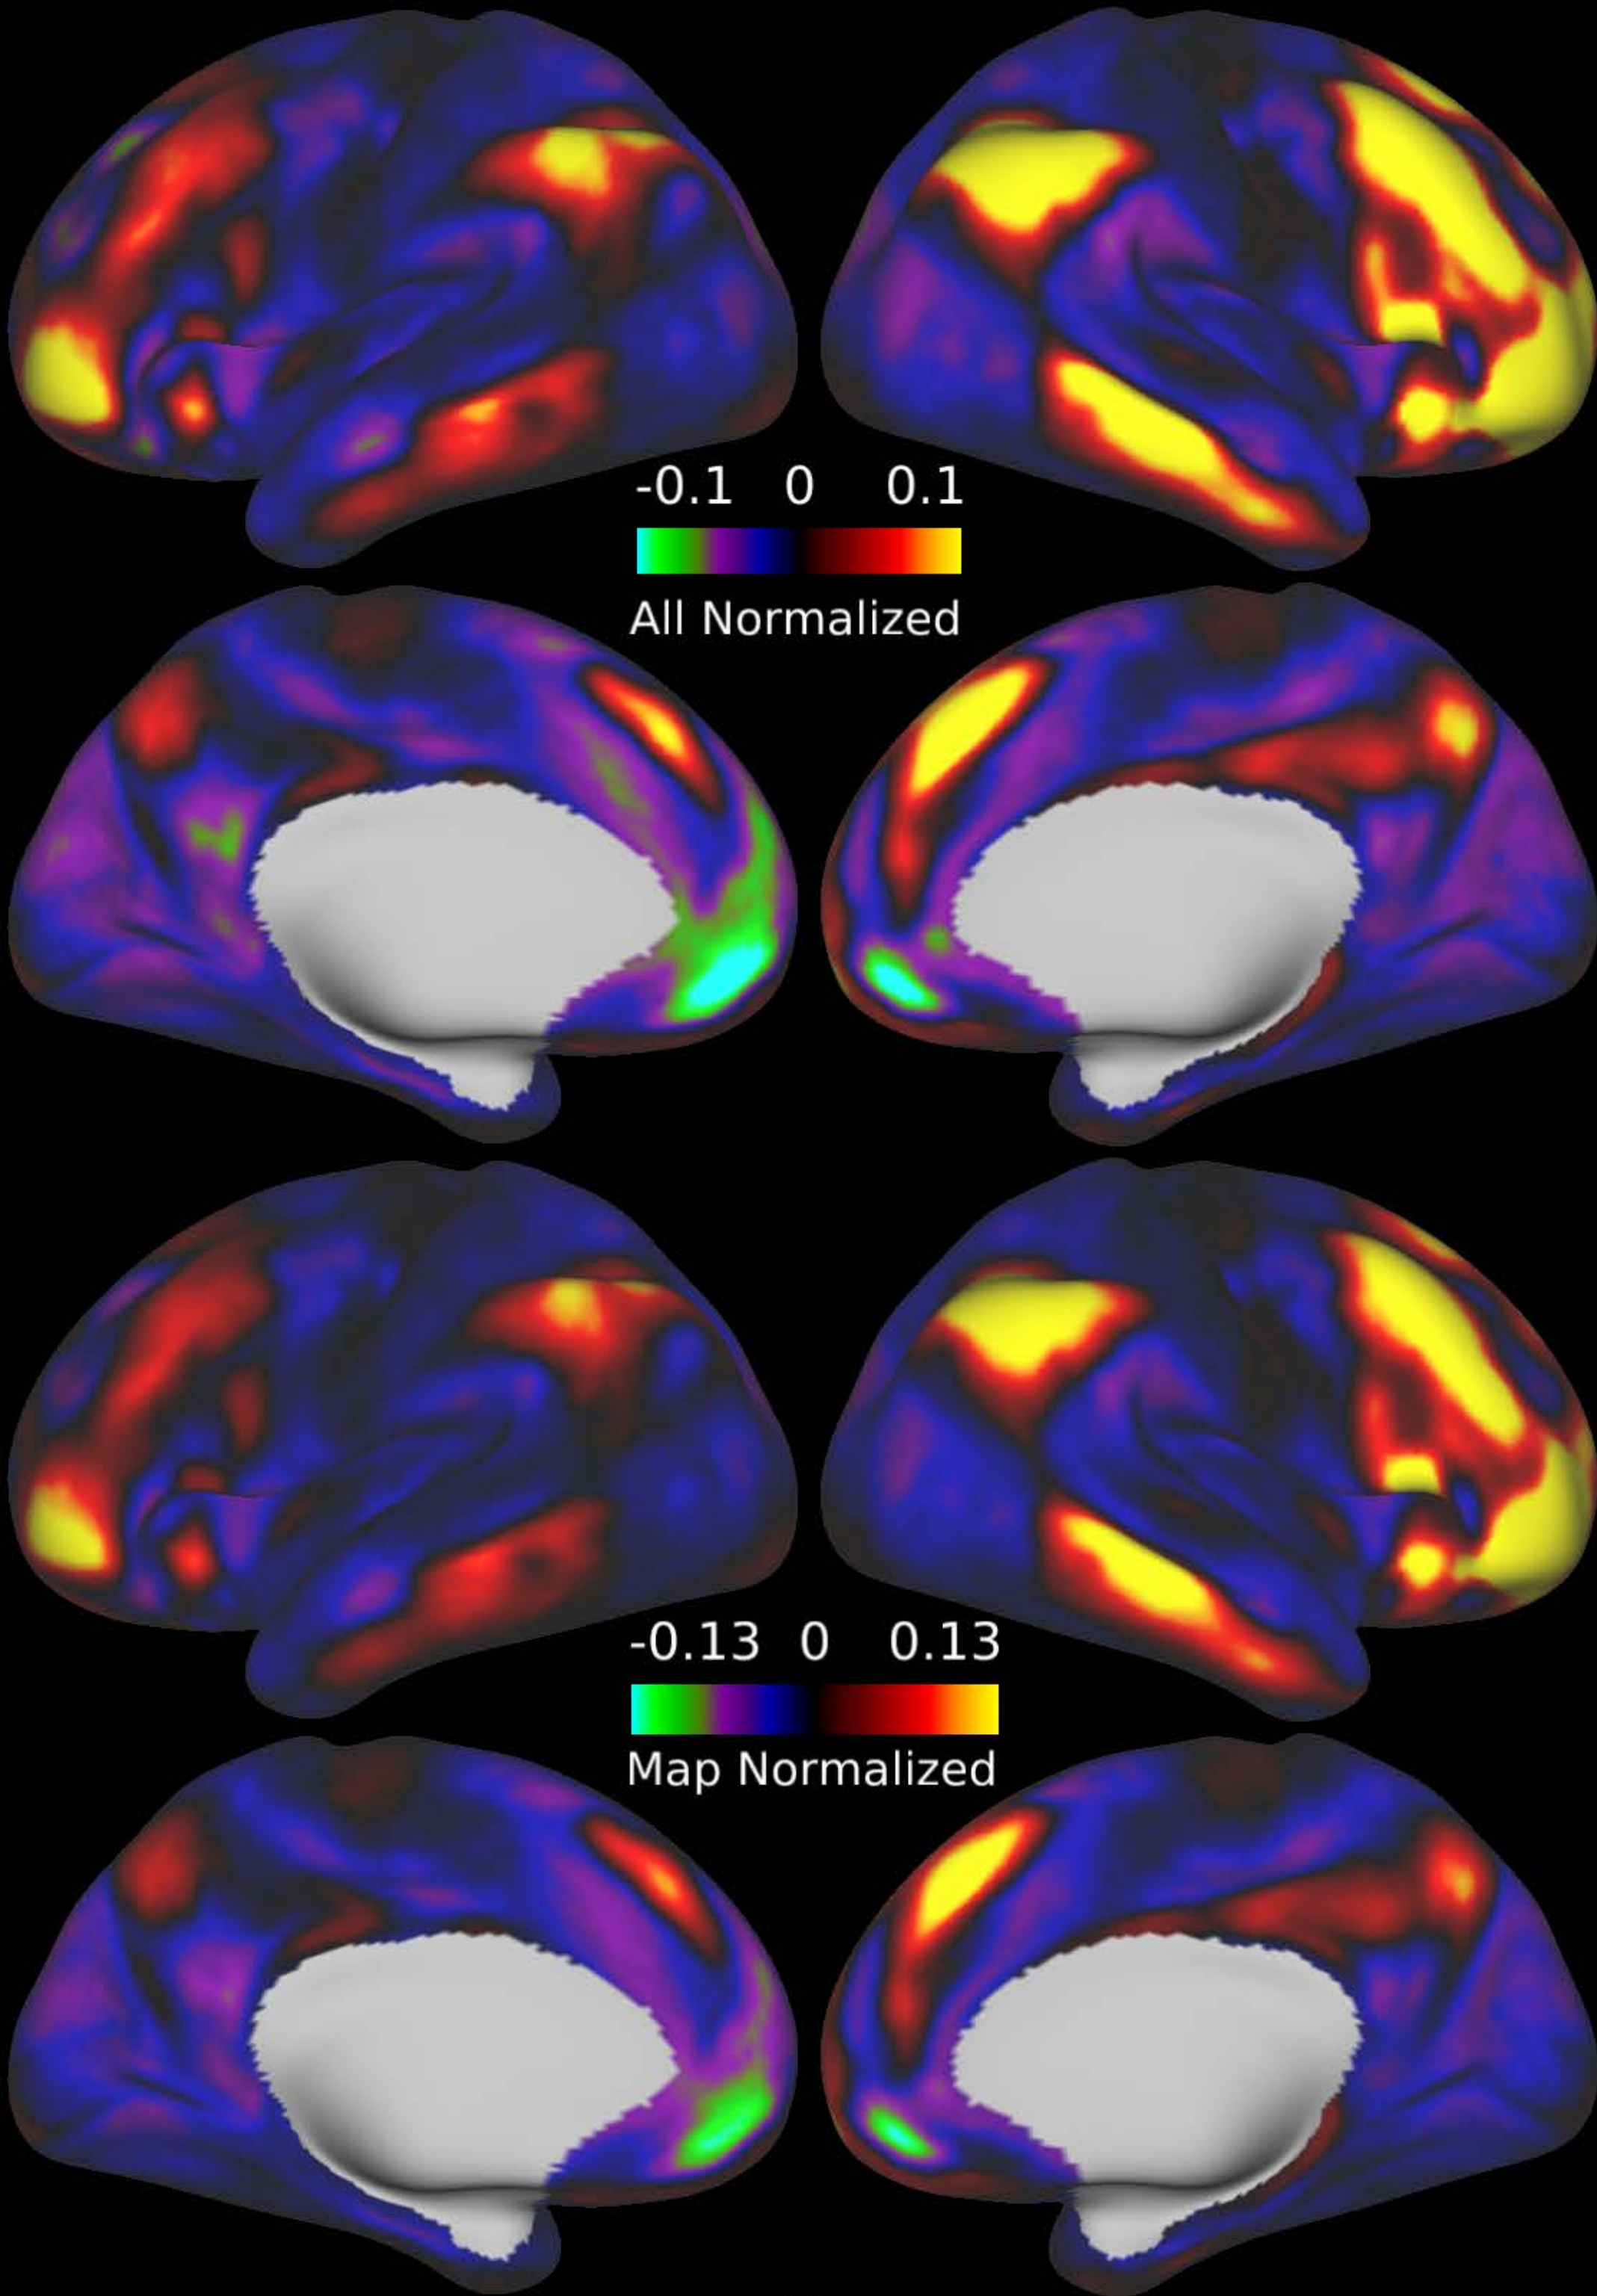

Hertz

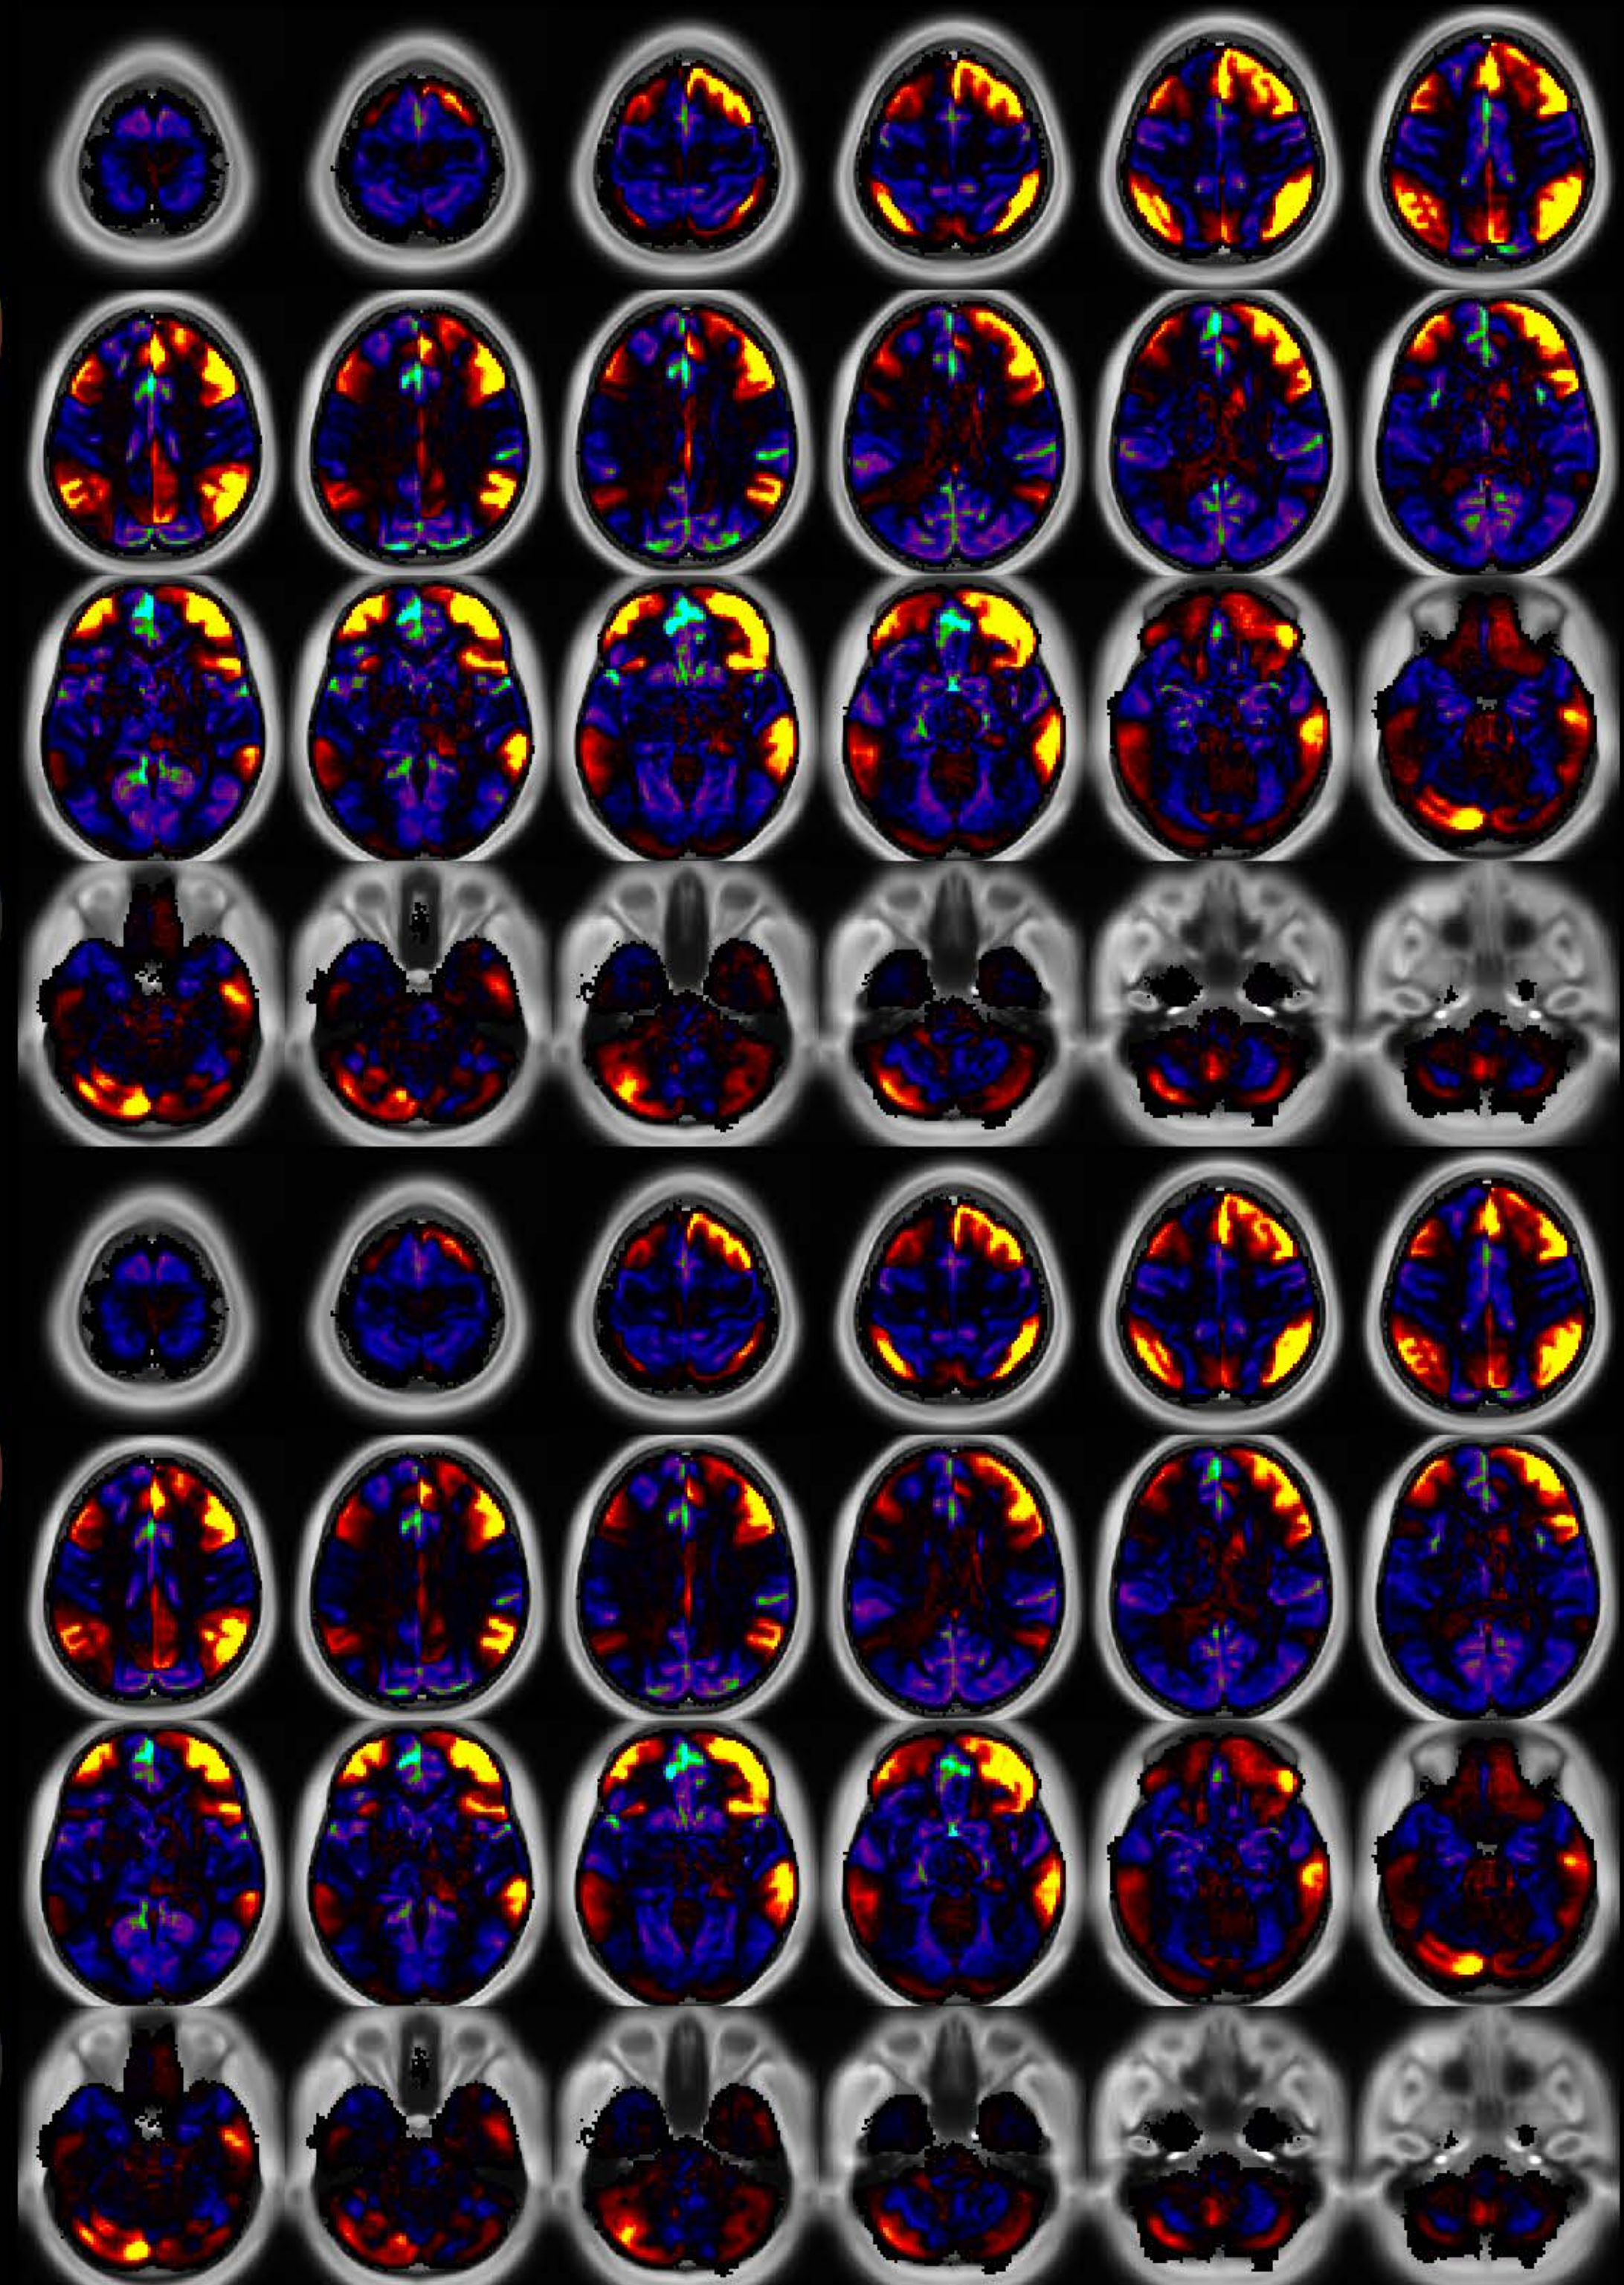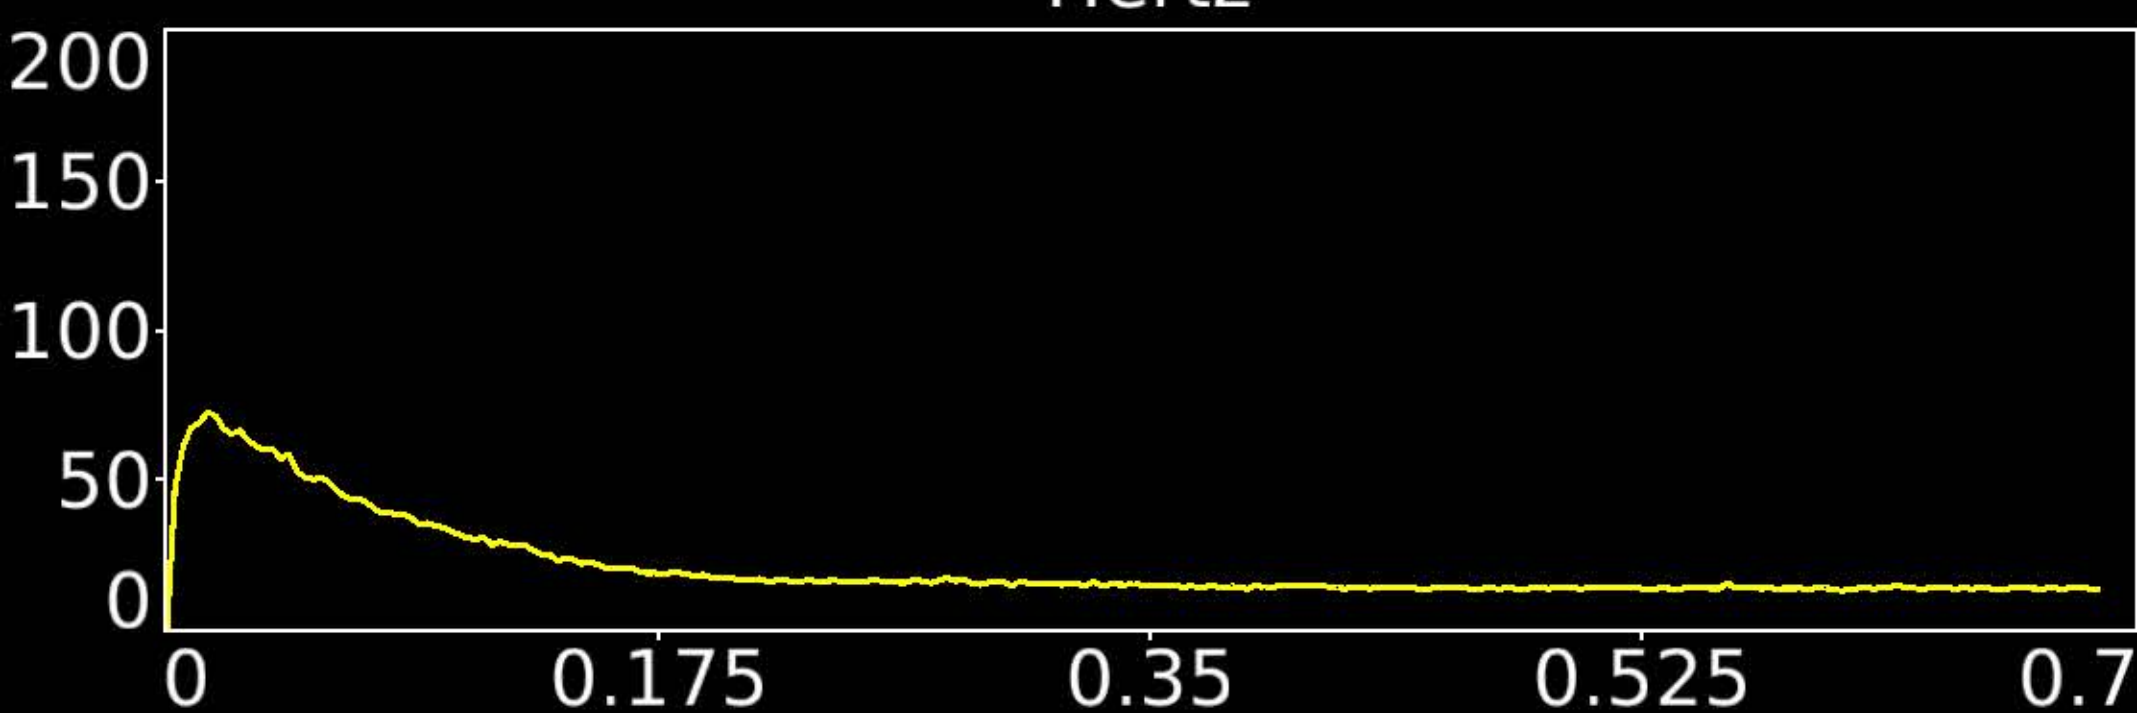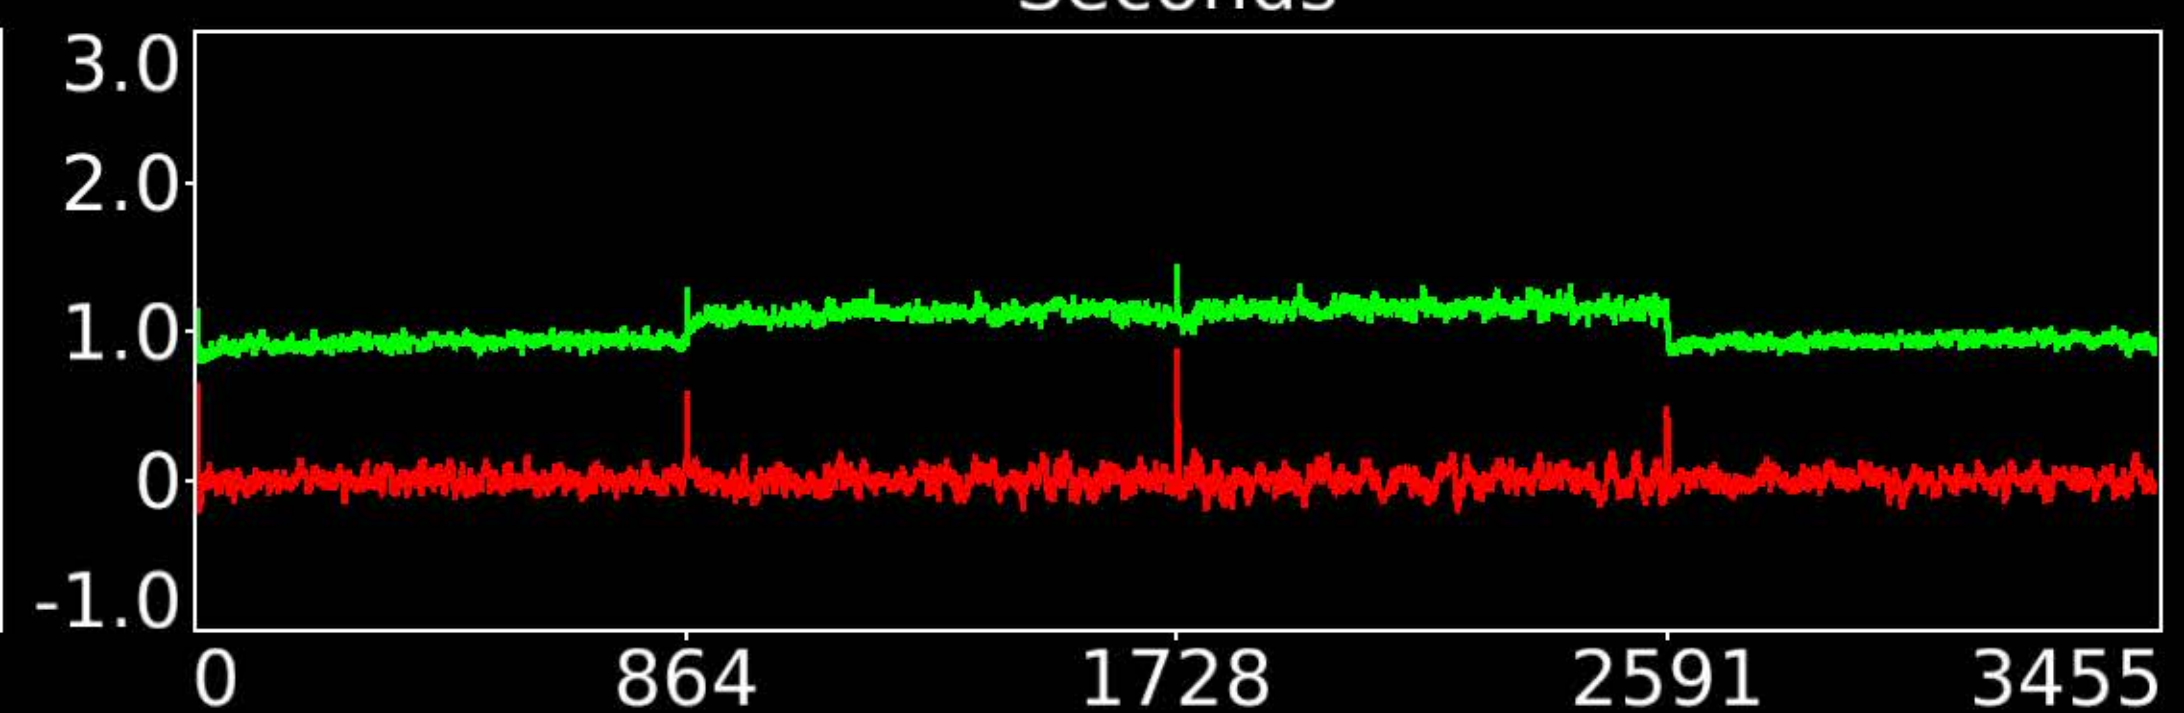

|                                                                                                             |                            |                                          |  |
|-------------------------------------------------------------------------------------------------------------|----------------------------|------------------------------------------|--|
| Number & Class: 17 Signal                                                                                   |                            | Name: Subsidiary Fronto-Parietal Network |  |
| RVT Correlated: No                                                                                          | DVARS Dip Associated: No   | Cross-Subject Variable: No               |  |
| Single Subject: No                                                                                          | % Variance Explained: 1.65 | Globality Index: 0.85                    |  |
| Task Component: No                                                                                          | Taskr Component: No        | Sleep Noted: No                          |  |
| Rationale: Spatial map includes positive and negative patches that respect known RSNs (e.g. Yeo Network 13) |                            |                                          |  |



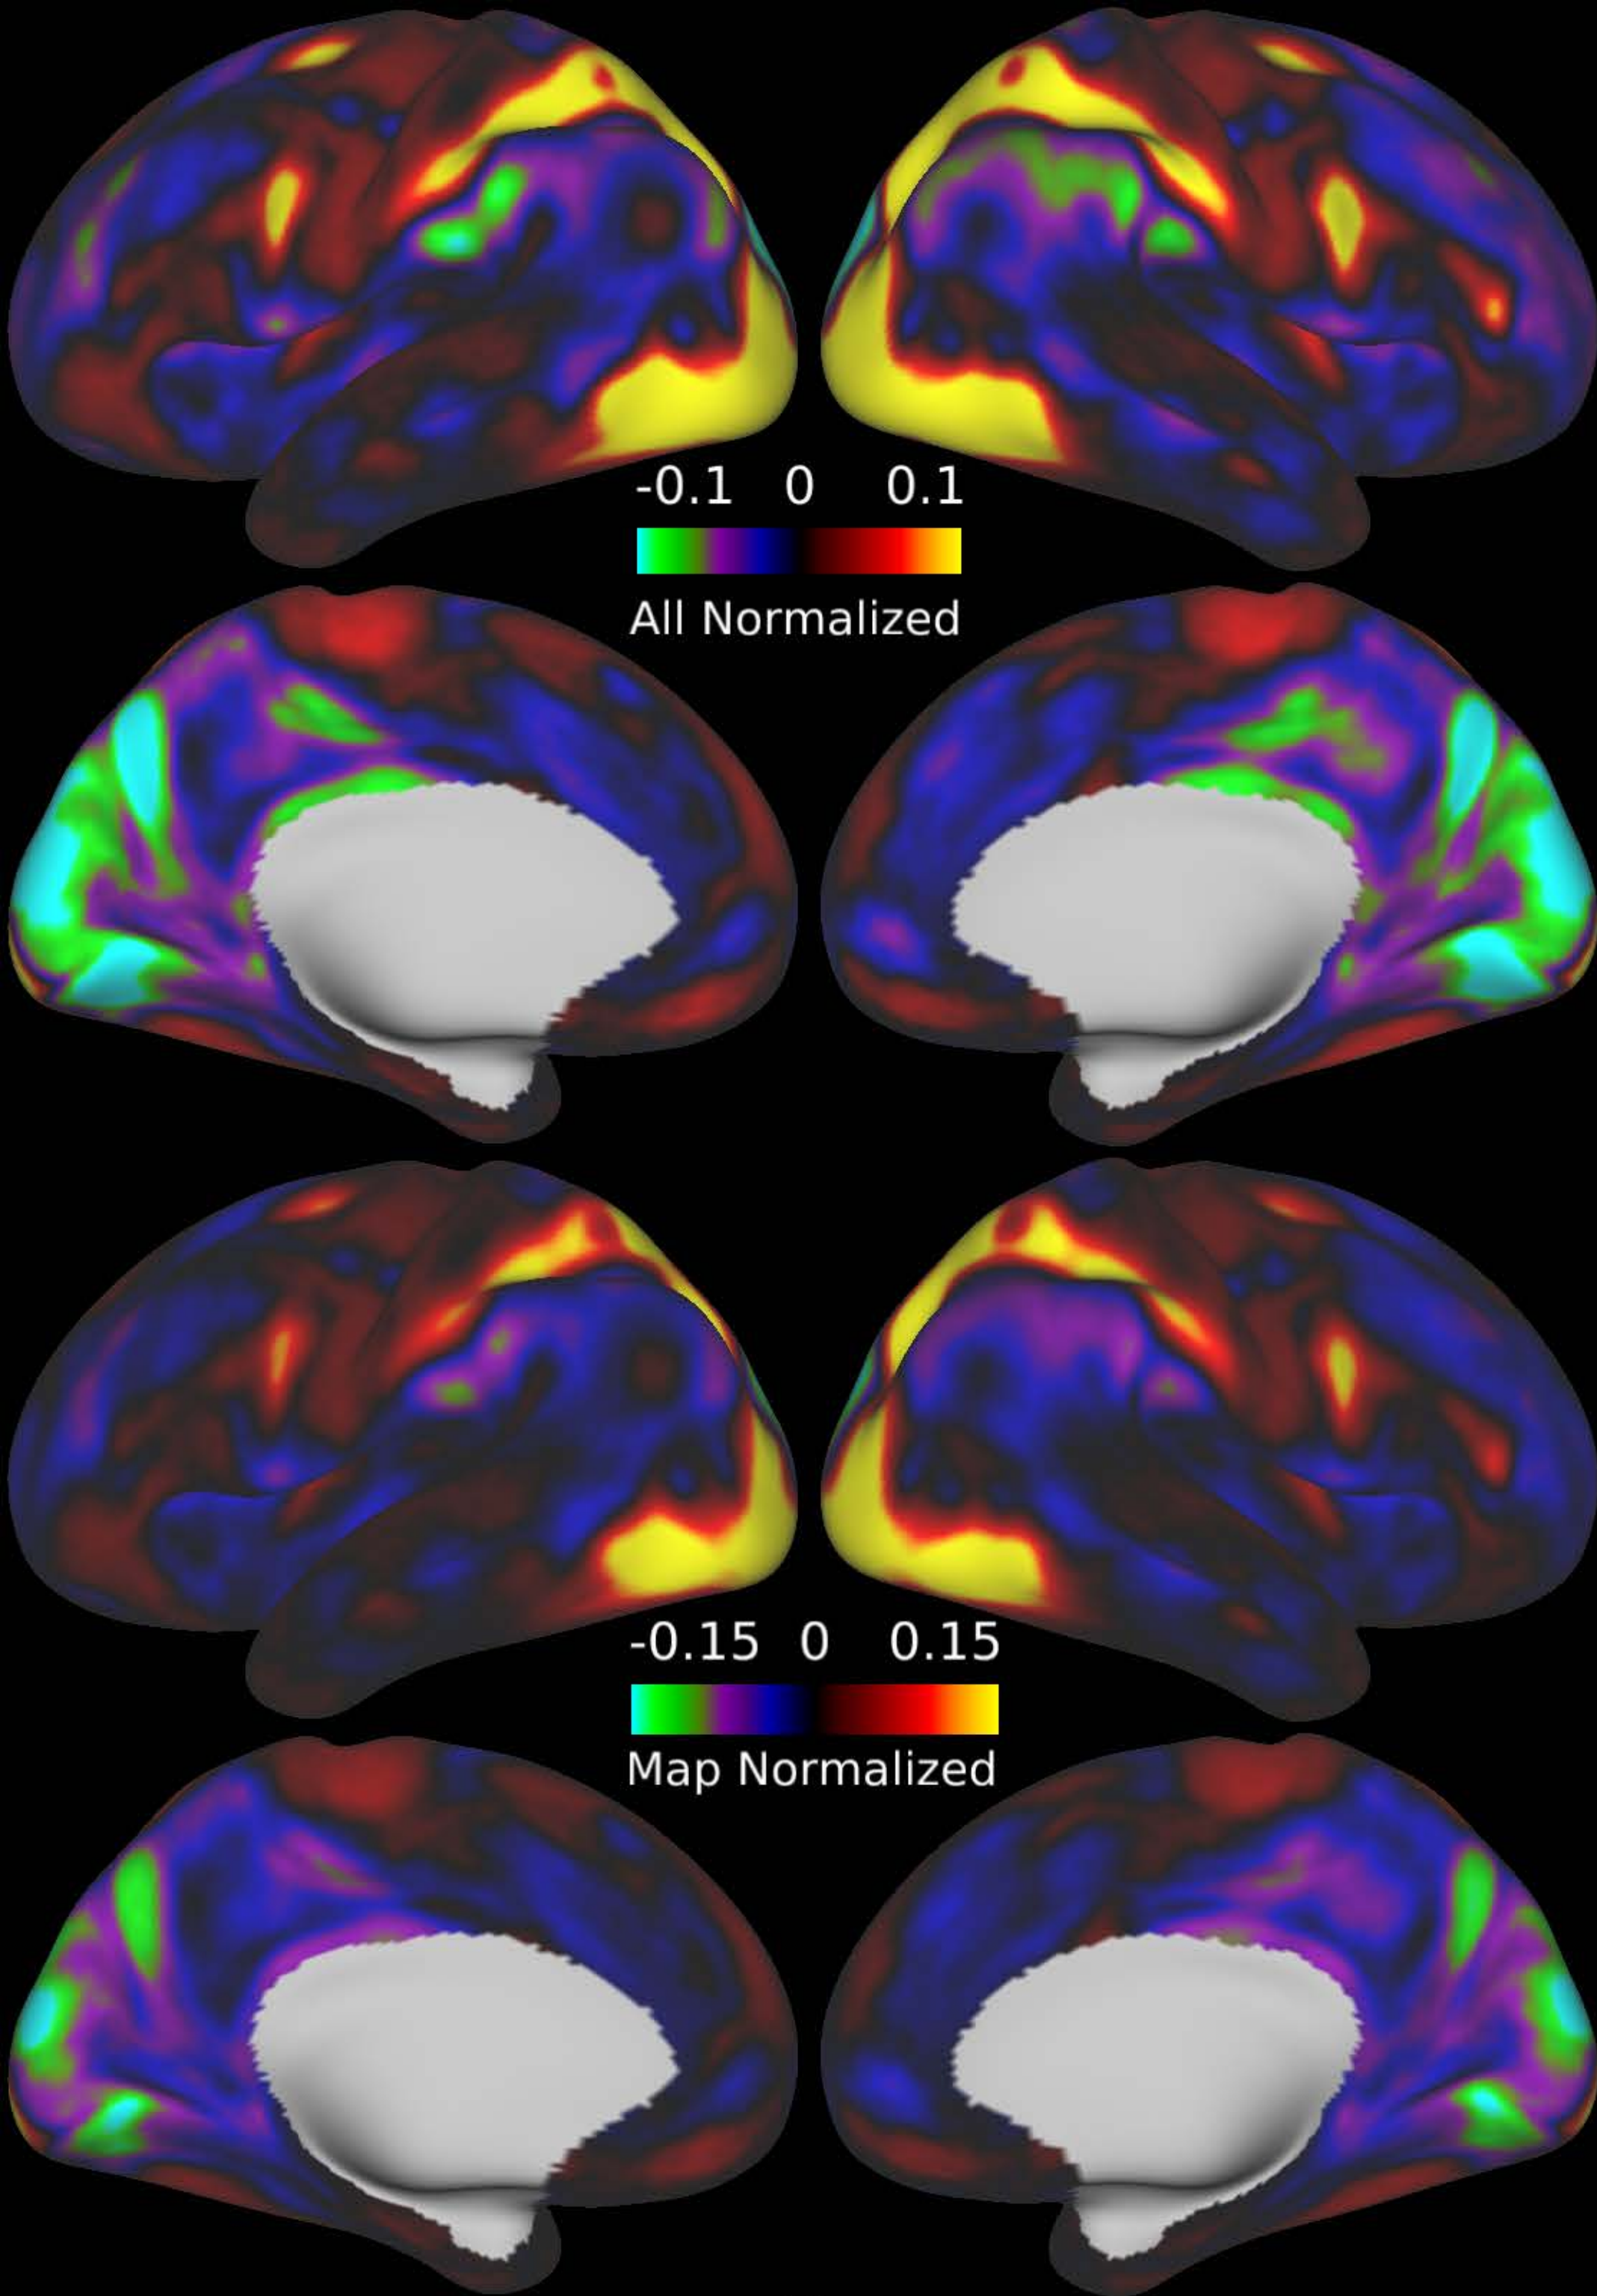

Hertz

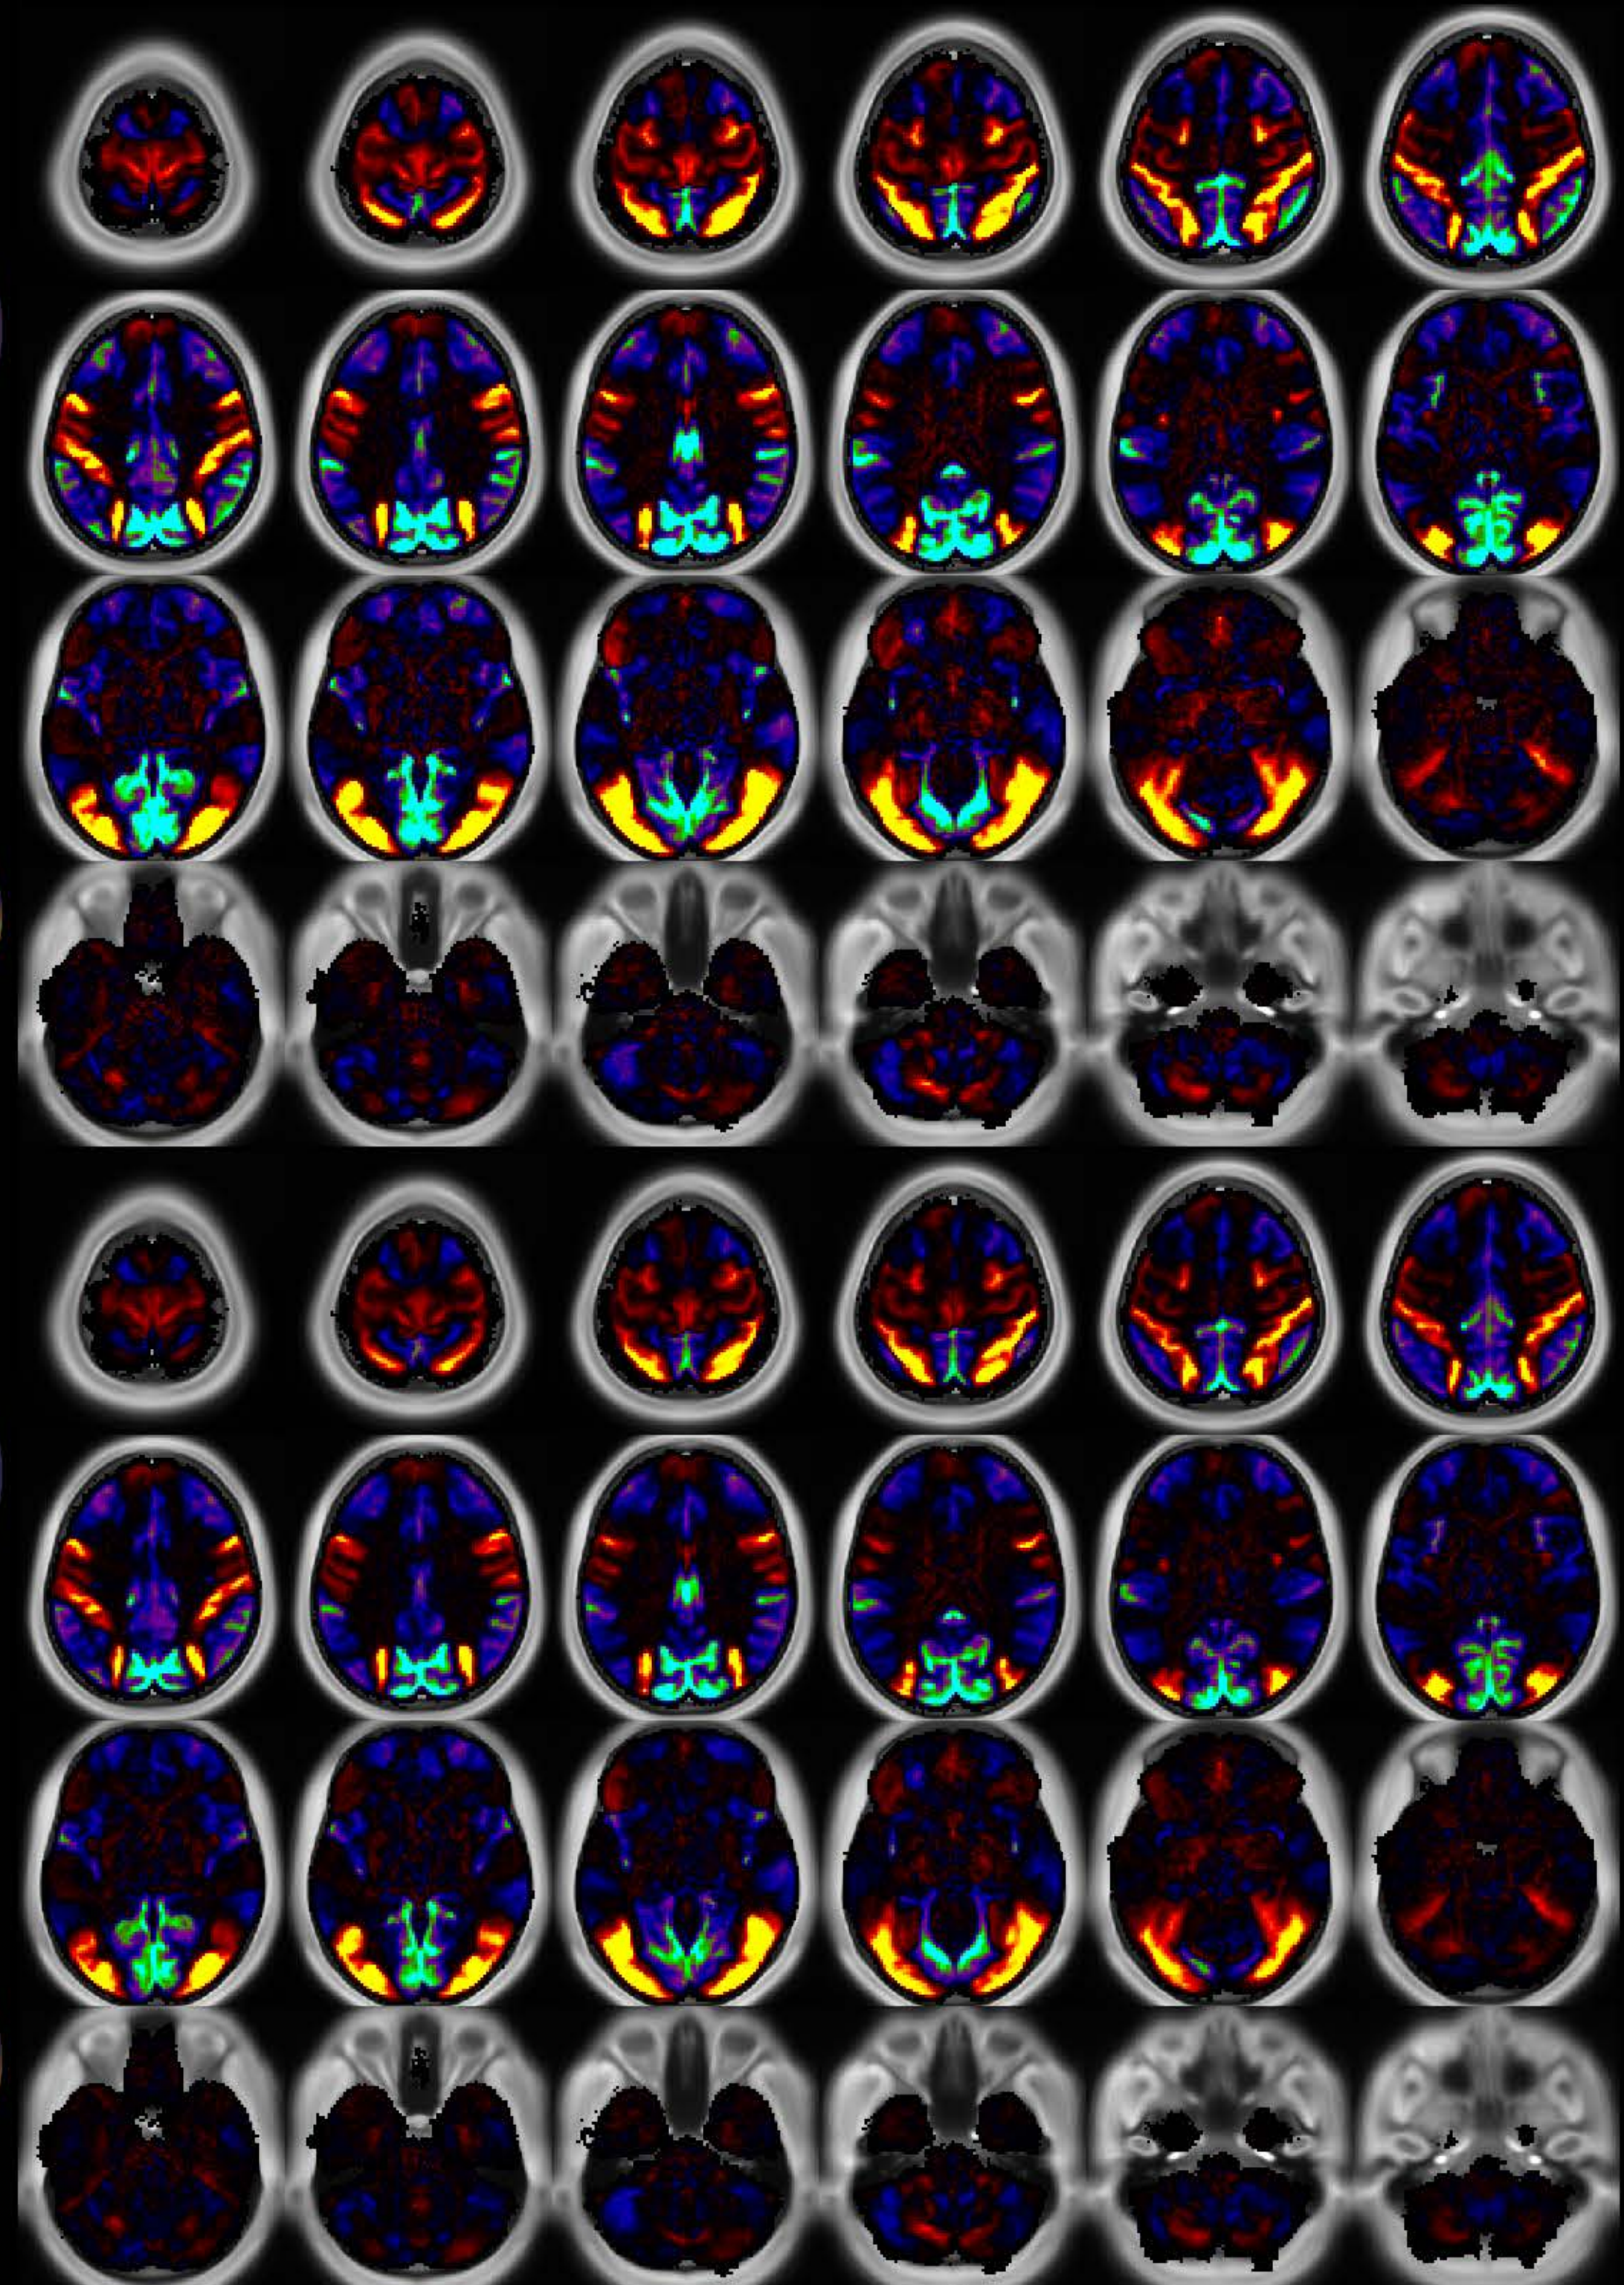

Seconds

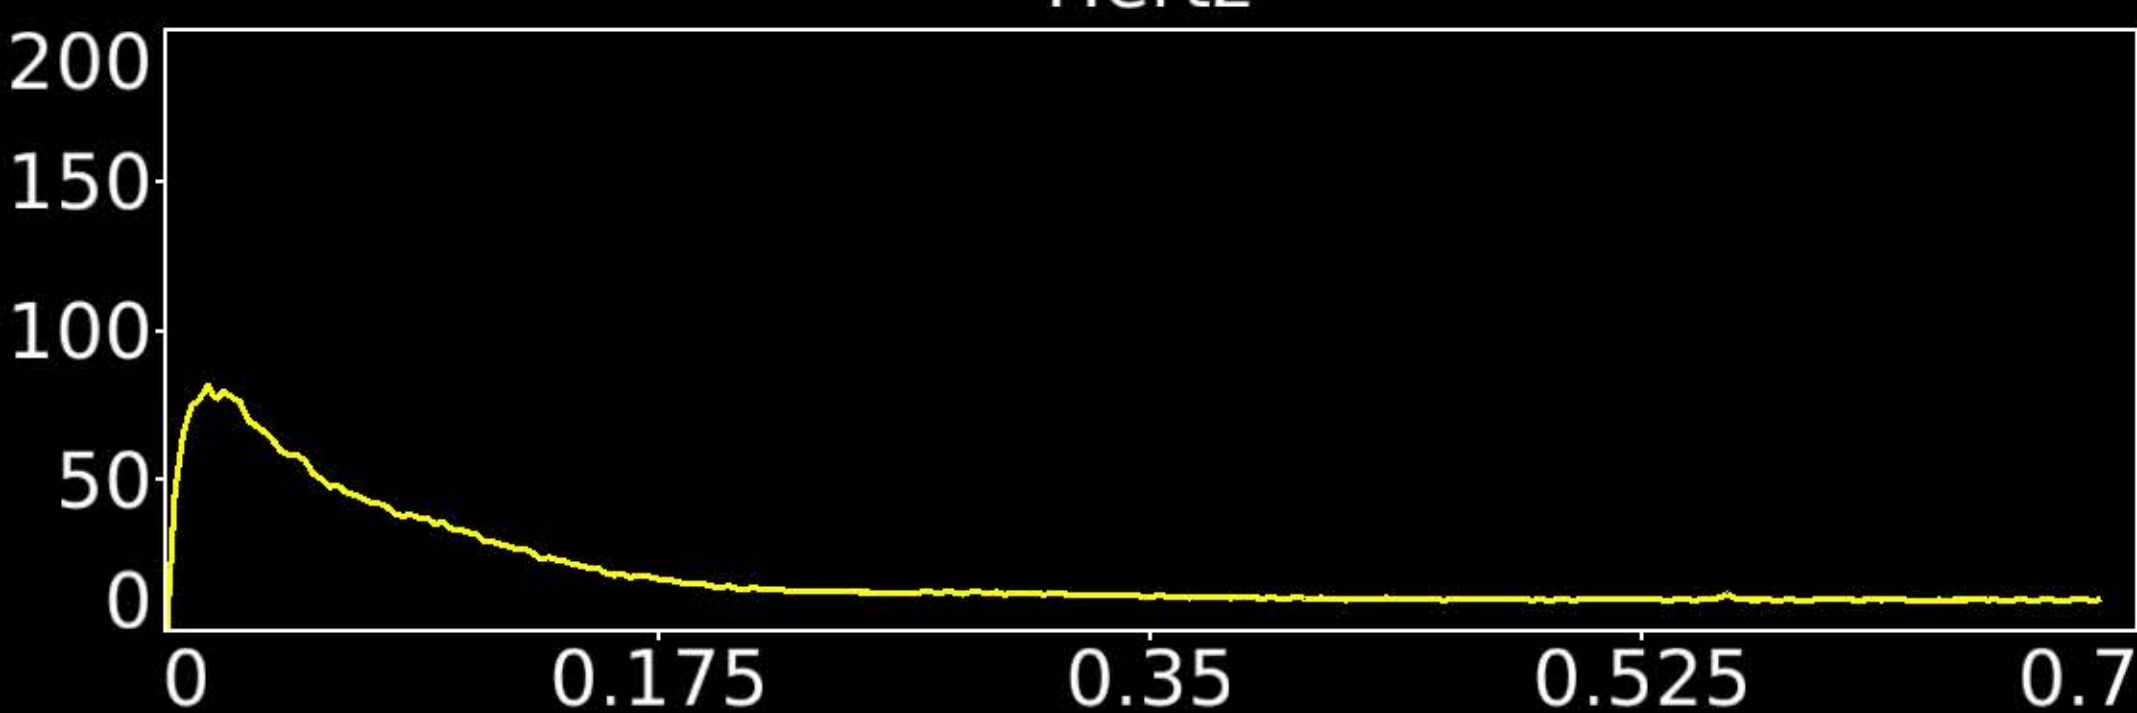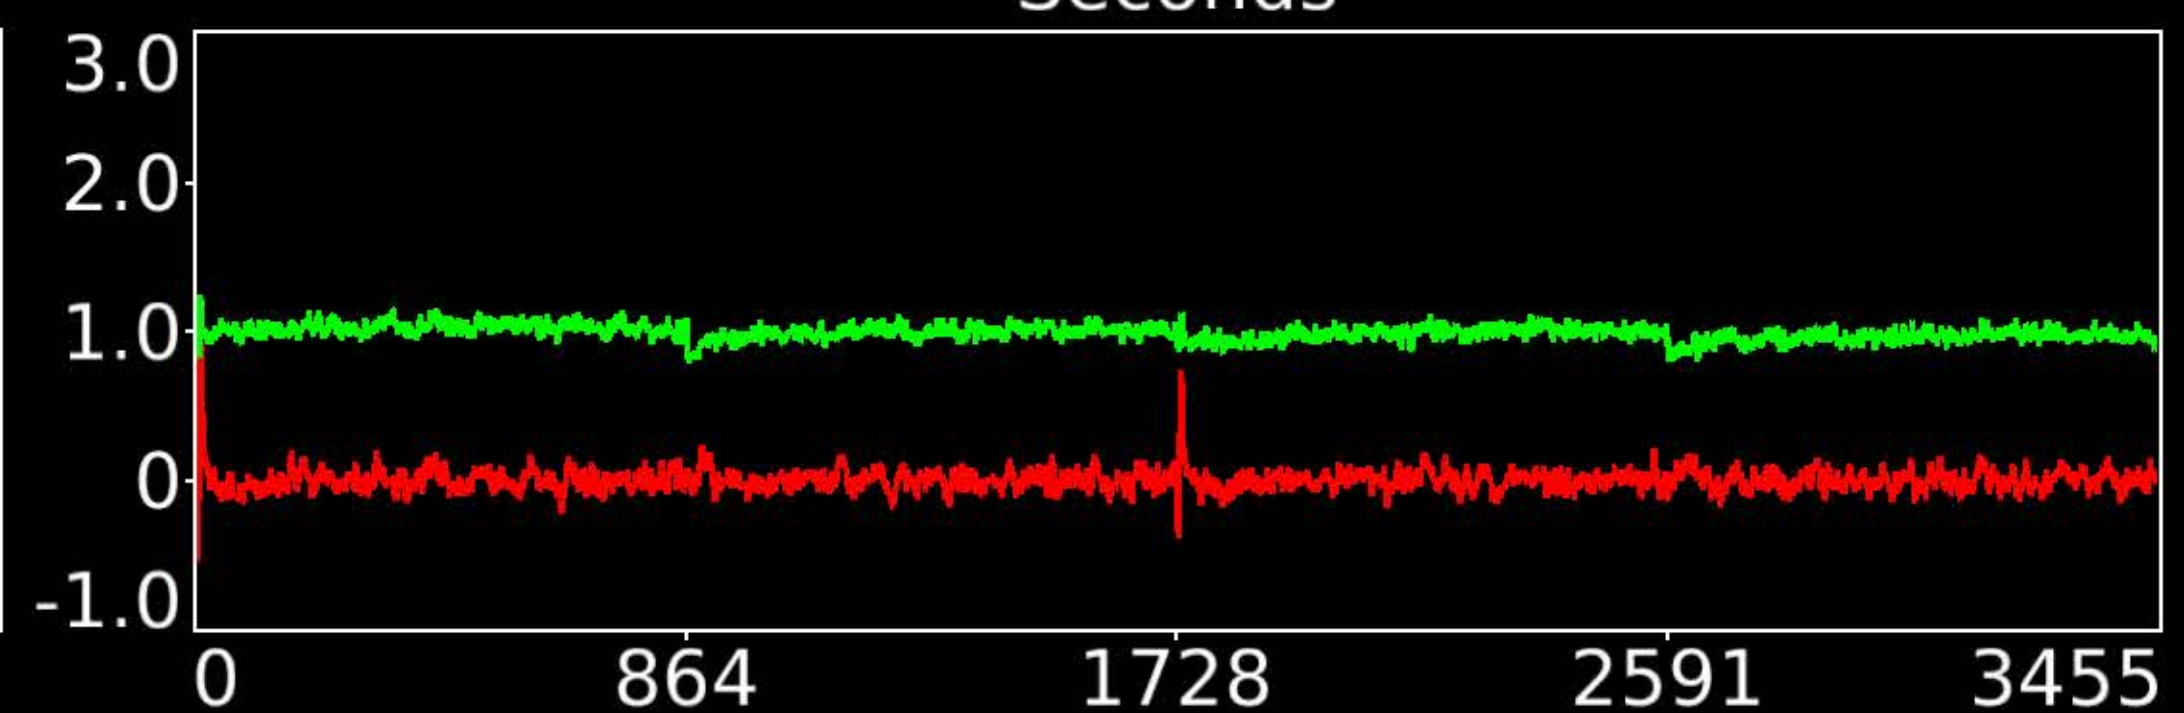

|                           |                           |                            |  |
|---------------------------|---------------------------|----------------------------|--|
| Number & Class: 18 Signal |                           | Name: Dorsal Stream Visual |  |
| RVT Correlated: No        | DVARS Dip Associated: No  | Cross-Subject Variable: No |  |
| Single Subject: No        | % Variance Explained: 1.6 | Globality Index: 0.28      |  |
| Task Component: No        | Taskr Component: 16       | Sleep Noted: No            |  |

Rationale: Spatial map includes positive and negative patches that respect known RSNs (e.g. Dorsal Attention Network)



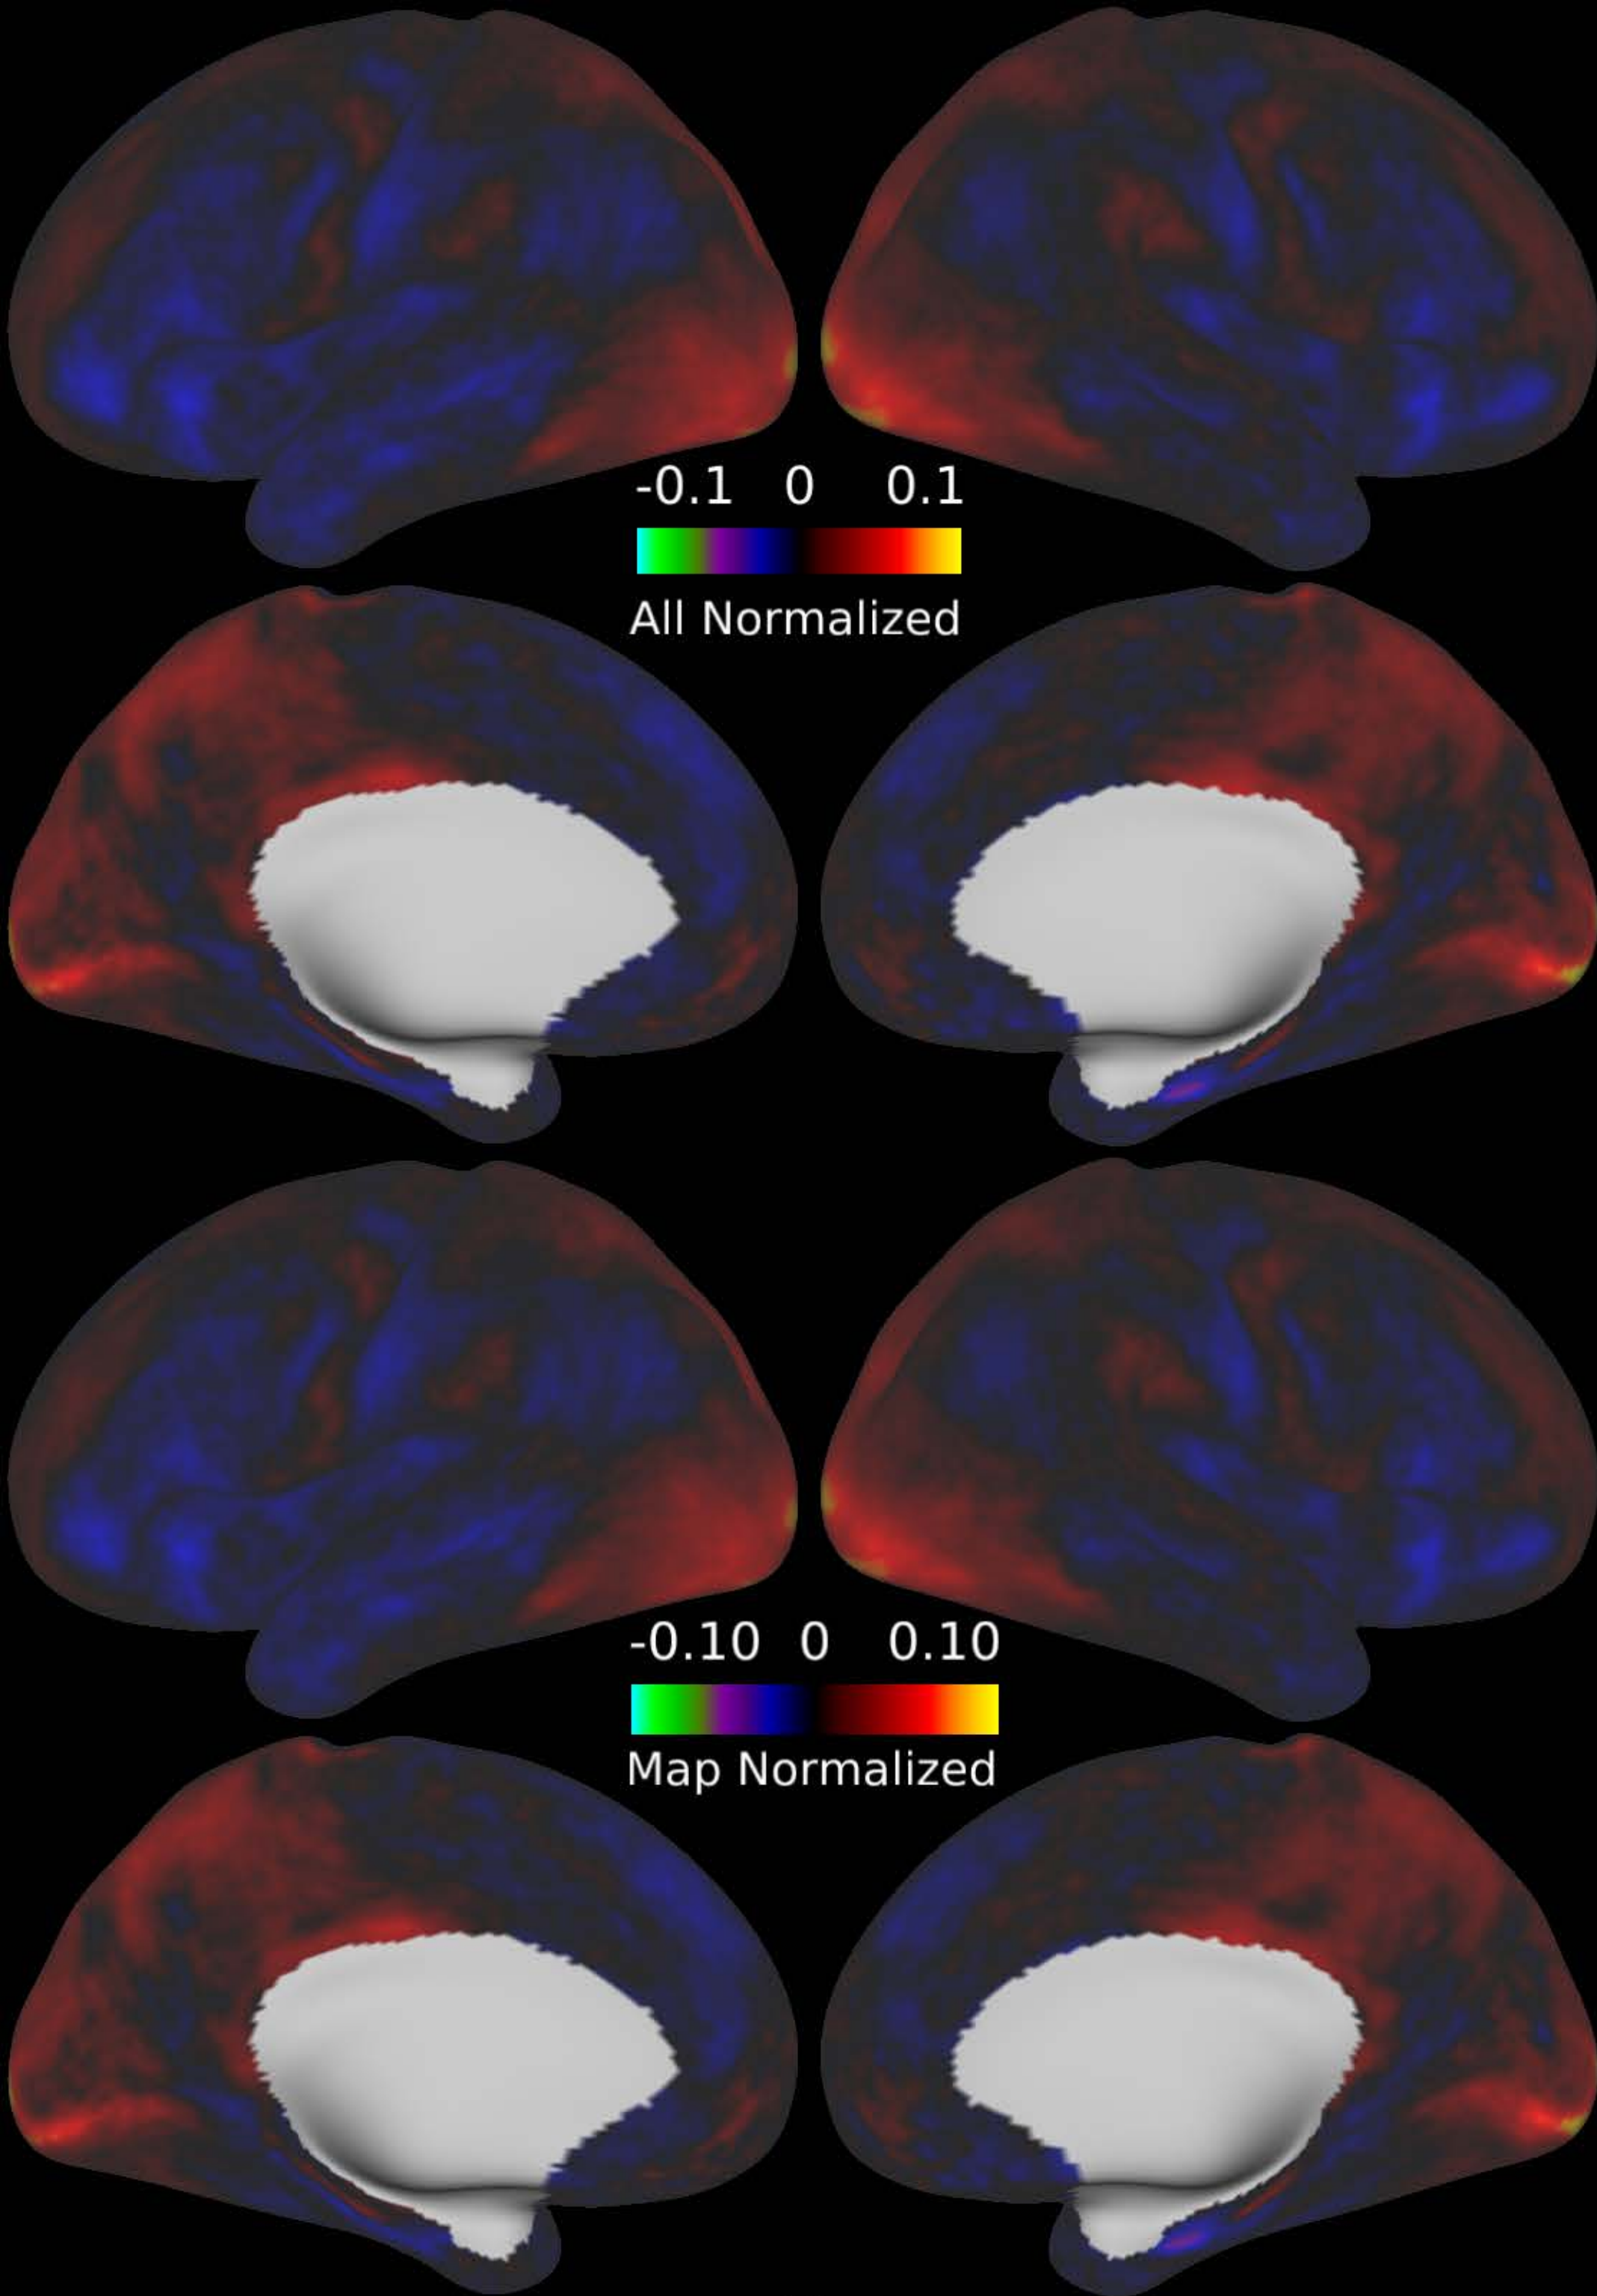

Hertz

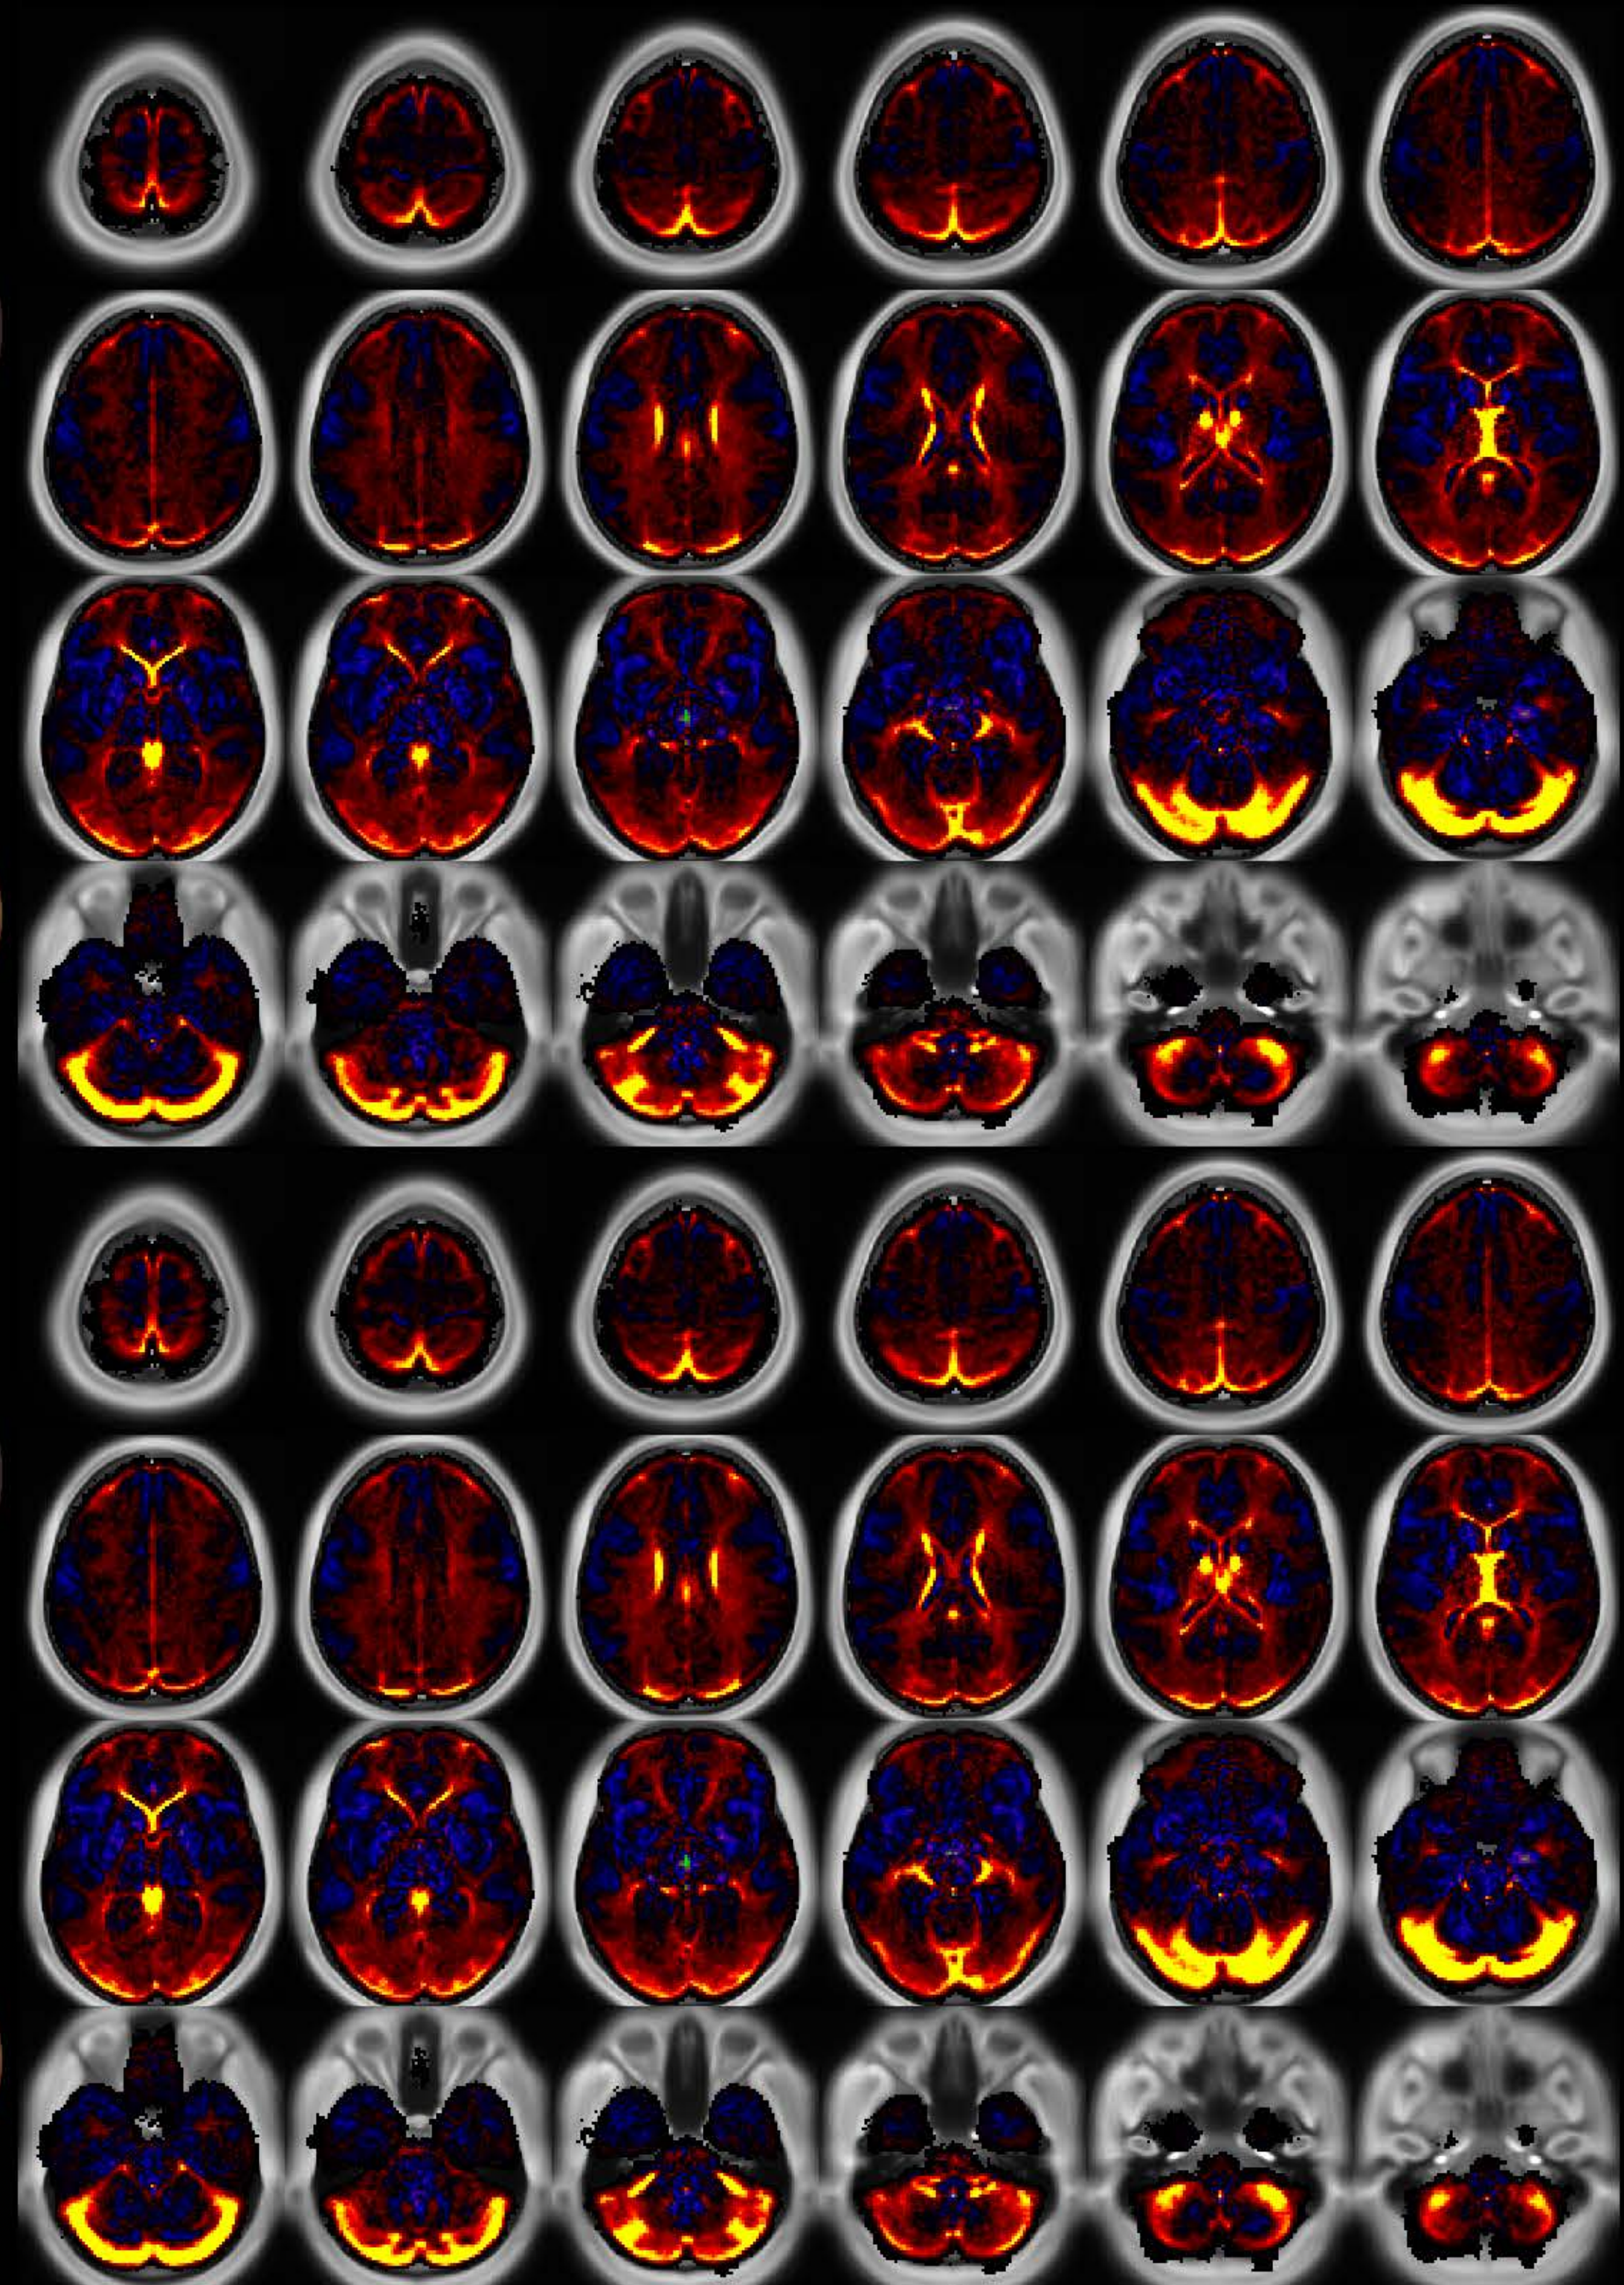

Seconds

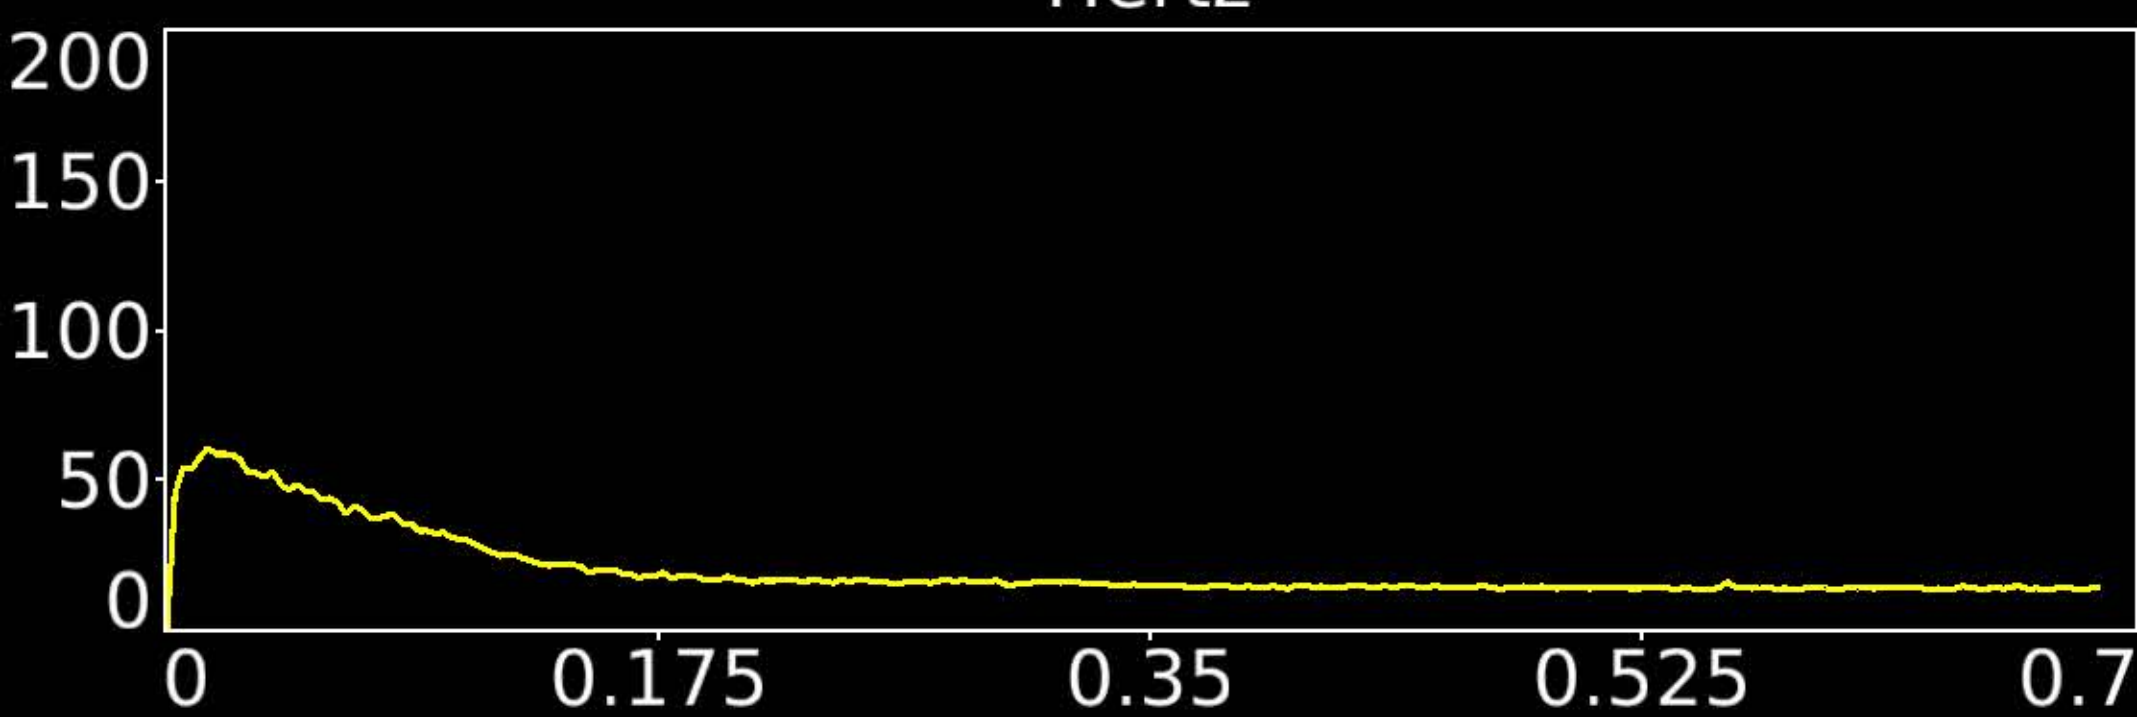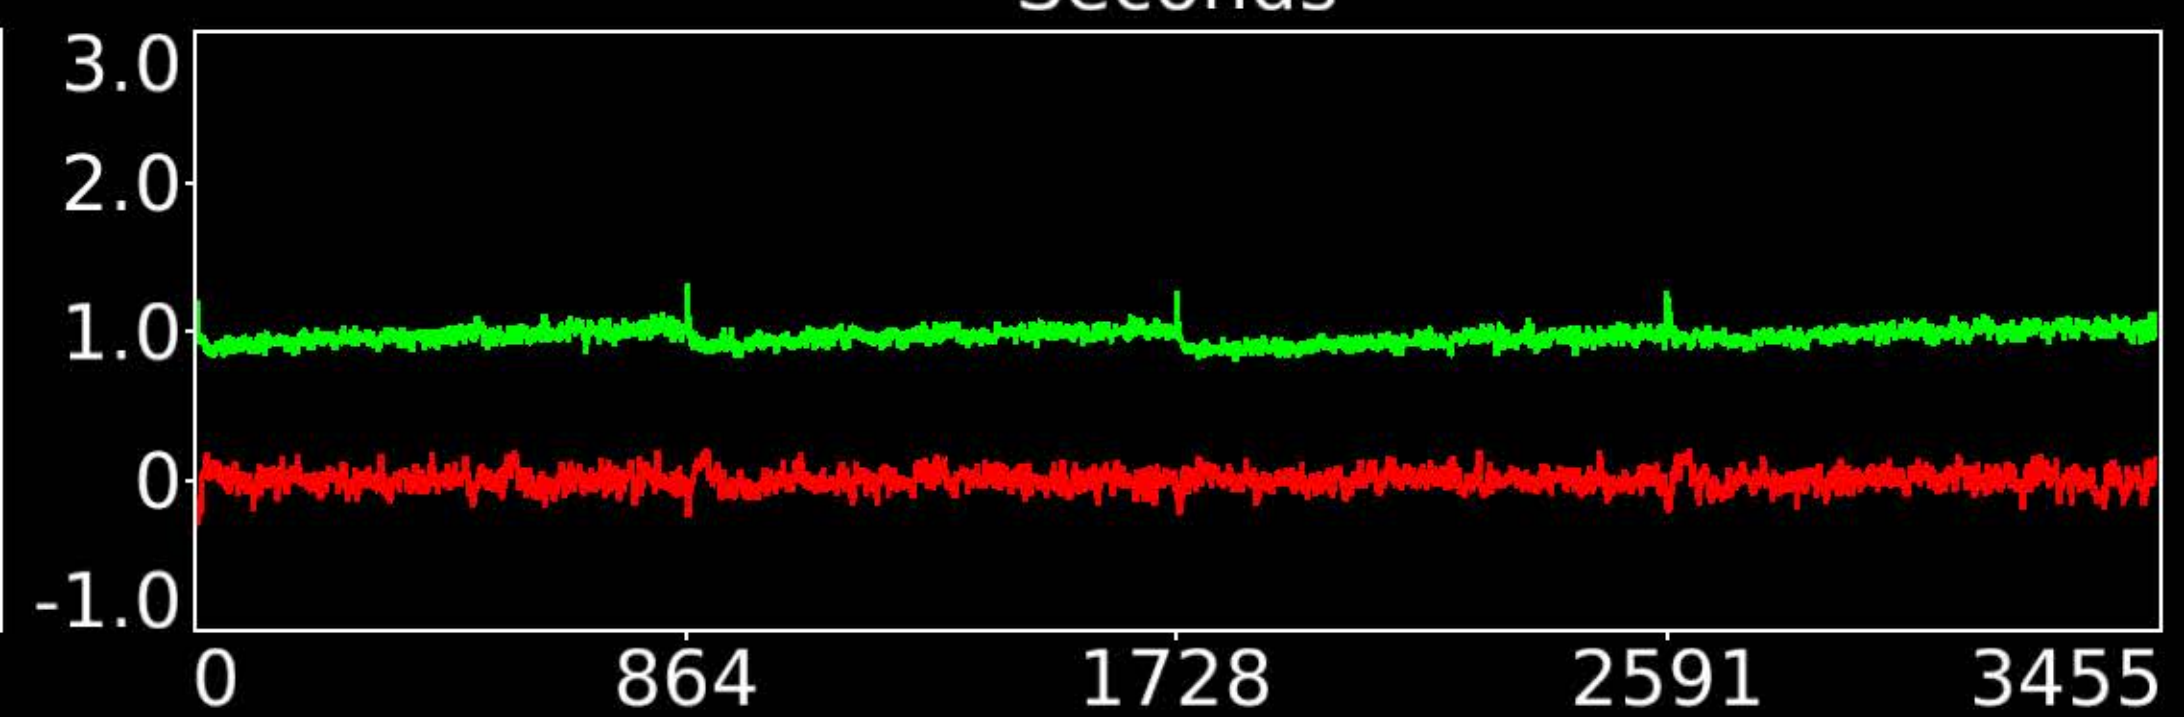

|                                                                            |                            |                             |  |
|----------------------------------------------------------------------------|----------------------------|-----------------------------|--|
| Number & Class: 19 Noise                                                   |                            | Name: Veins + WM            |  |
| RVT Correlated: No                                                         | DVARS Dip Associated: Yes  | Cross-Subject Variable: Yes |  |
| Single Subject: No                                                         | % Variance Explained: 1.46 | Globality Index: 0.34       |  |
| Task Component: 8                                                          | Taskr Component: 5         | Sleep Noted: No             |  |
| Rationale: Spatial map contains substantial white matter and venous signal |                            |                             |  |



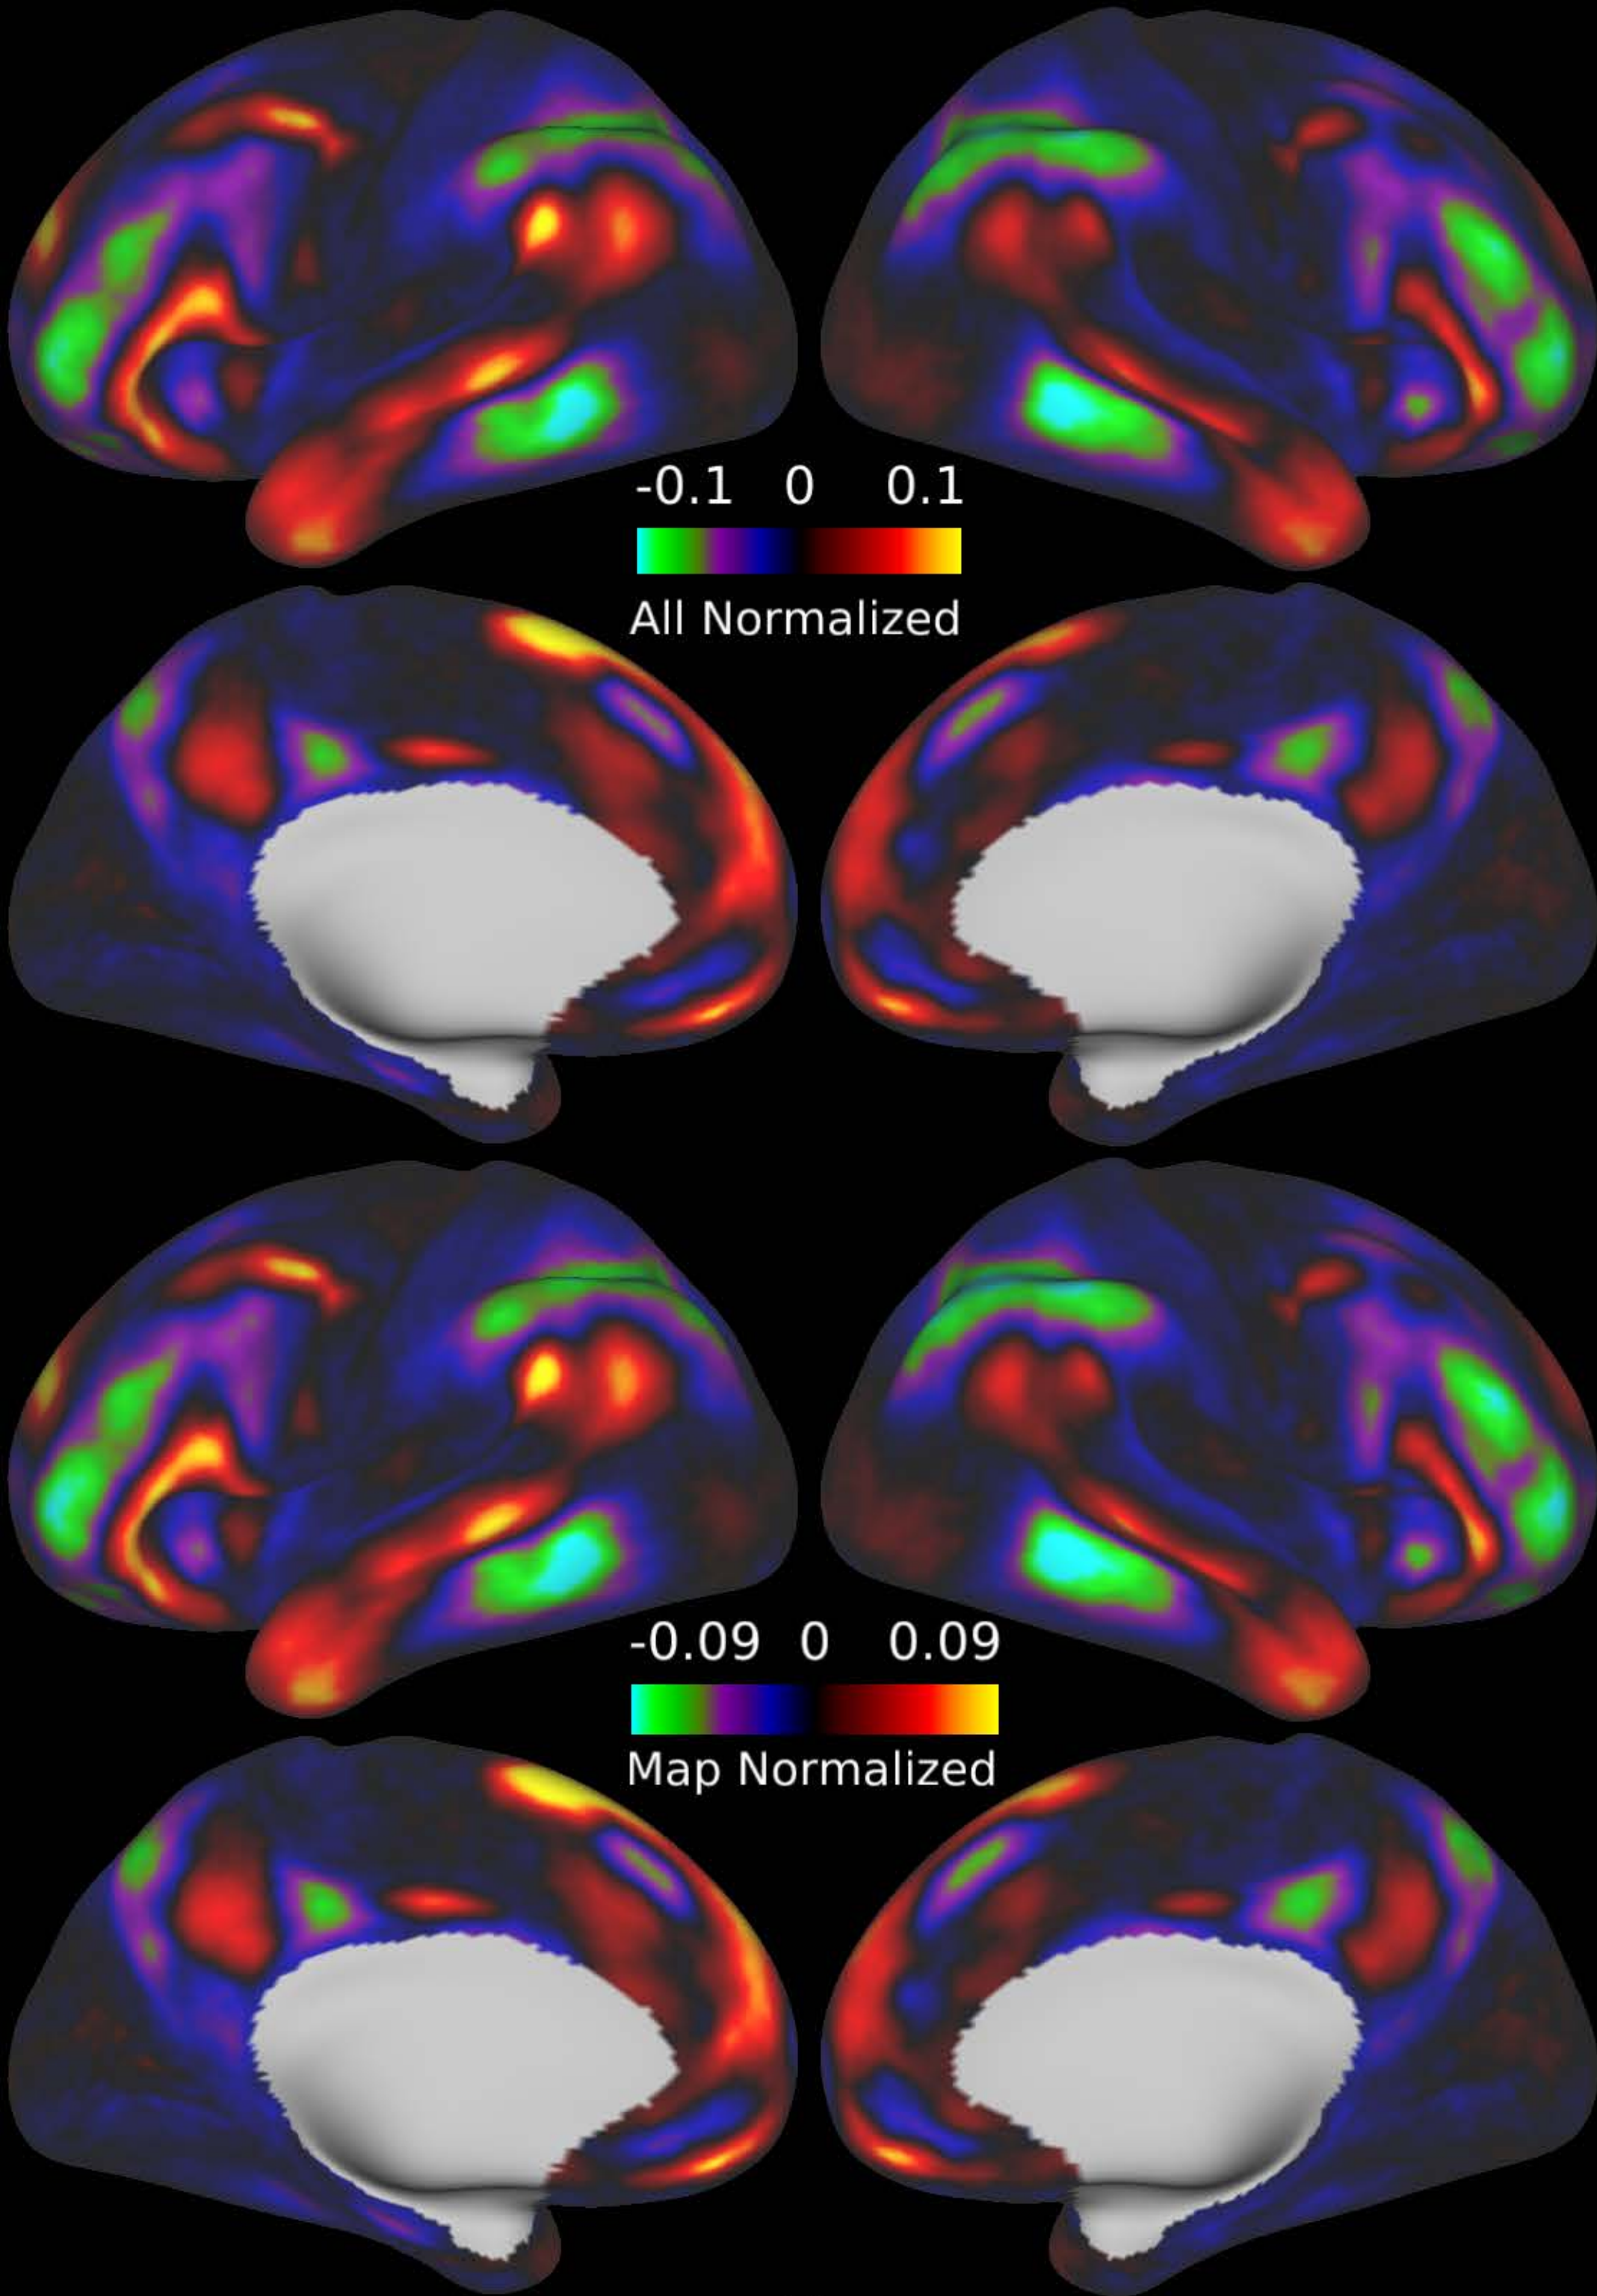

Hertz

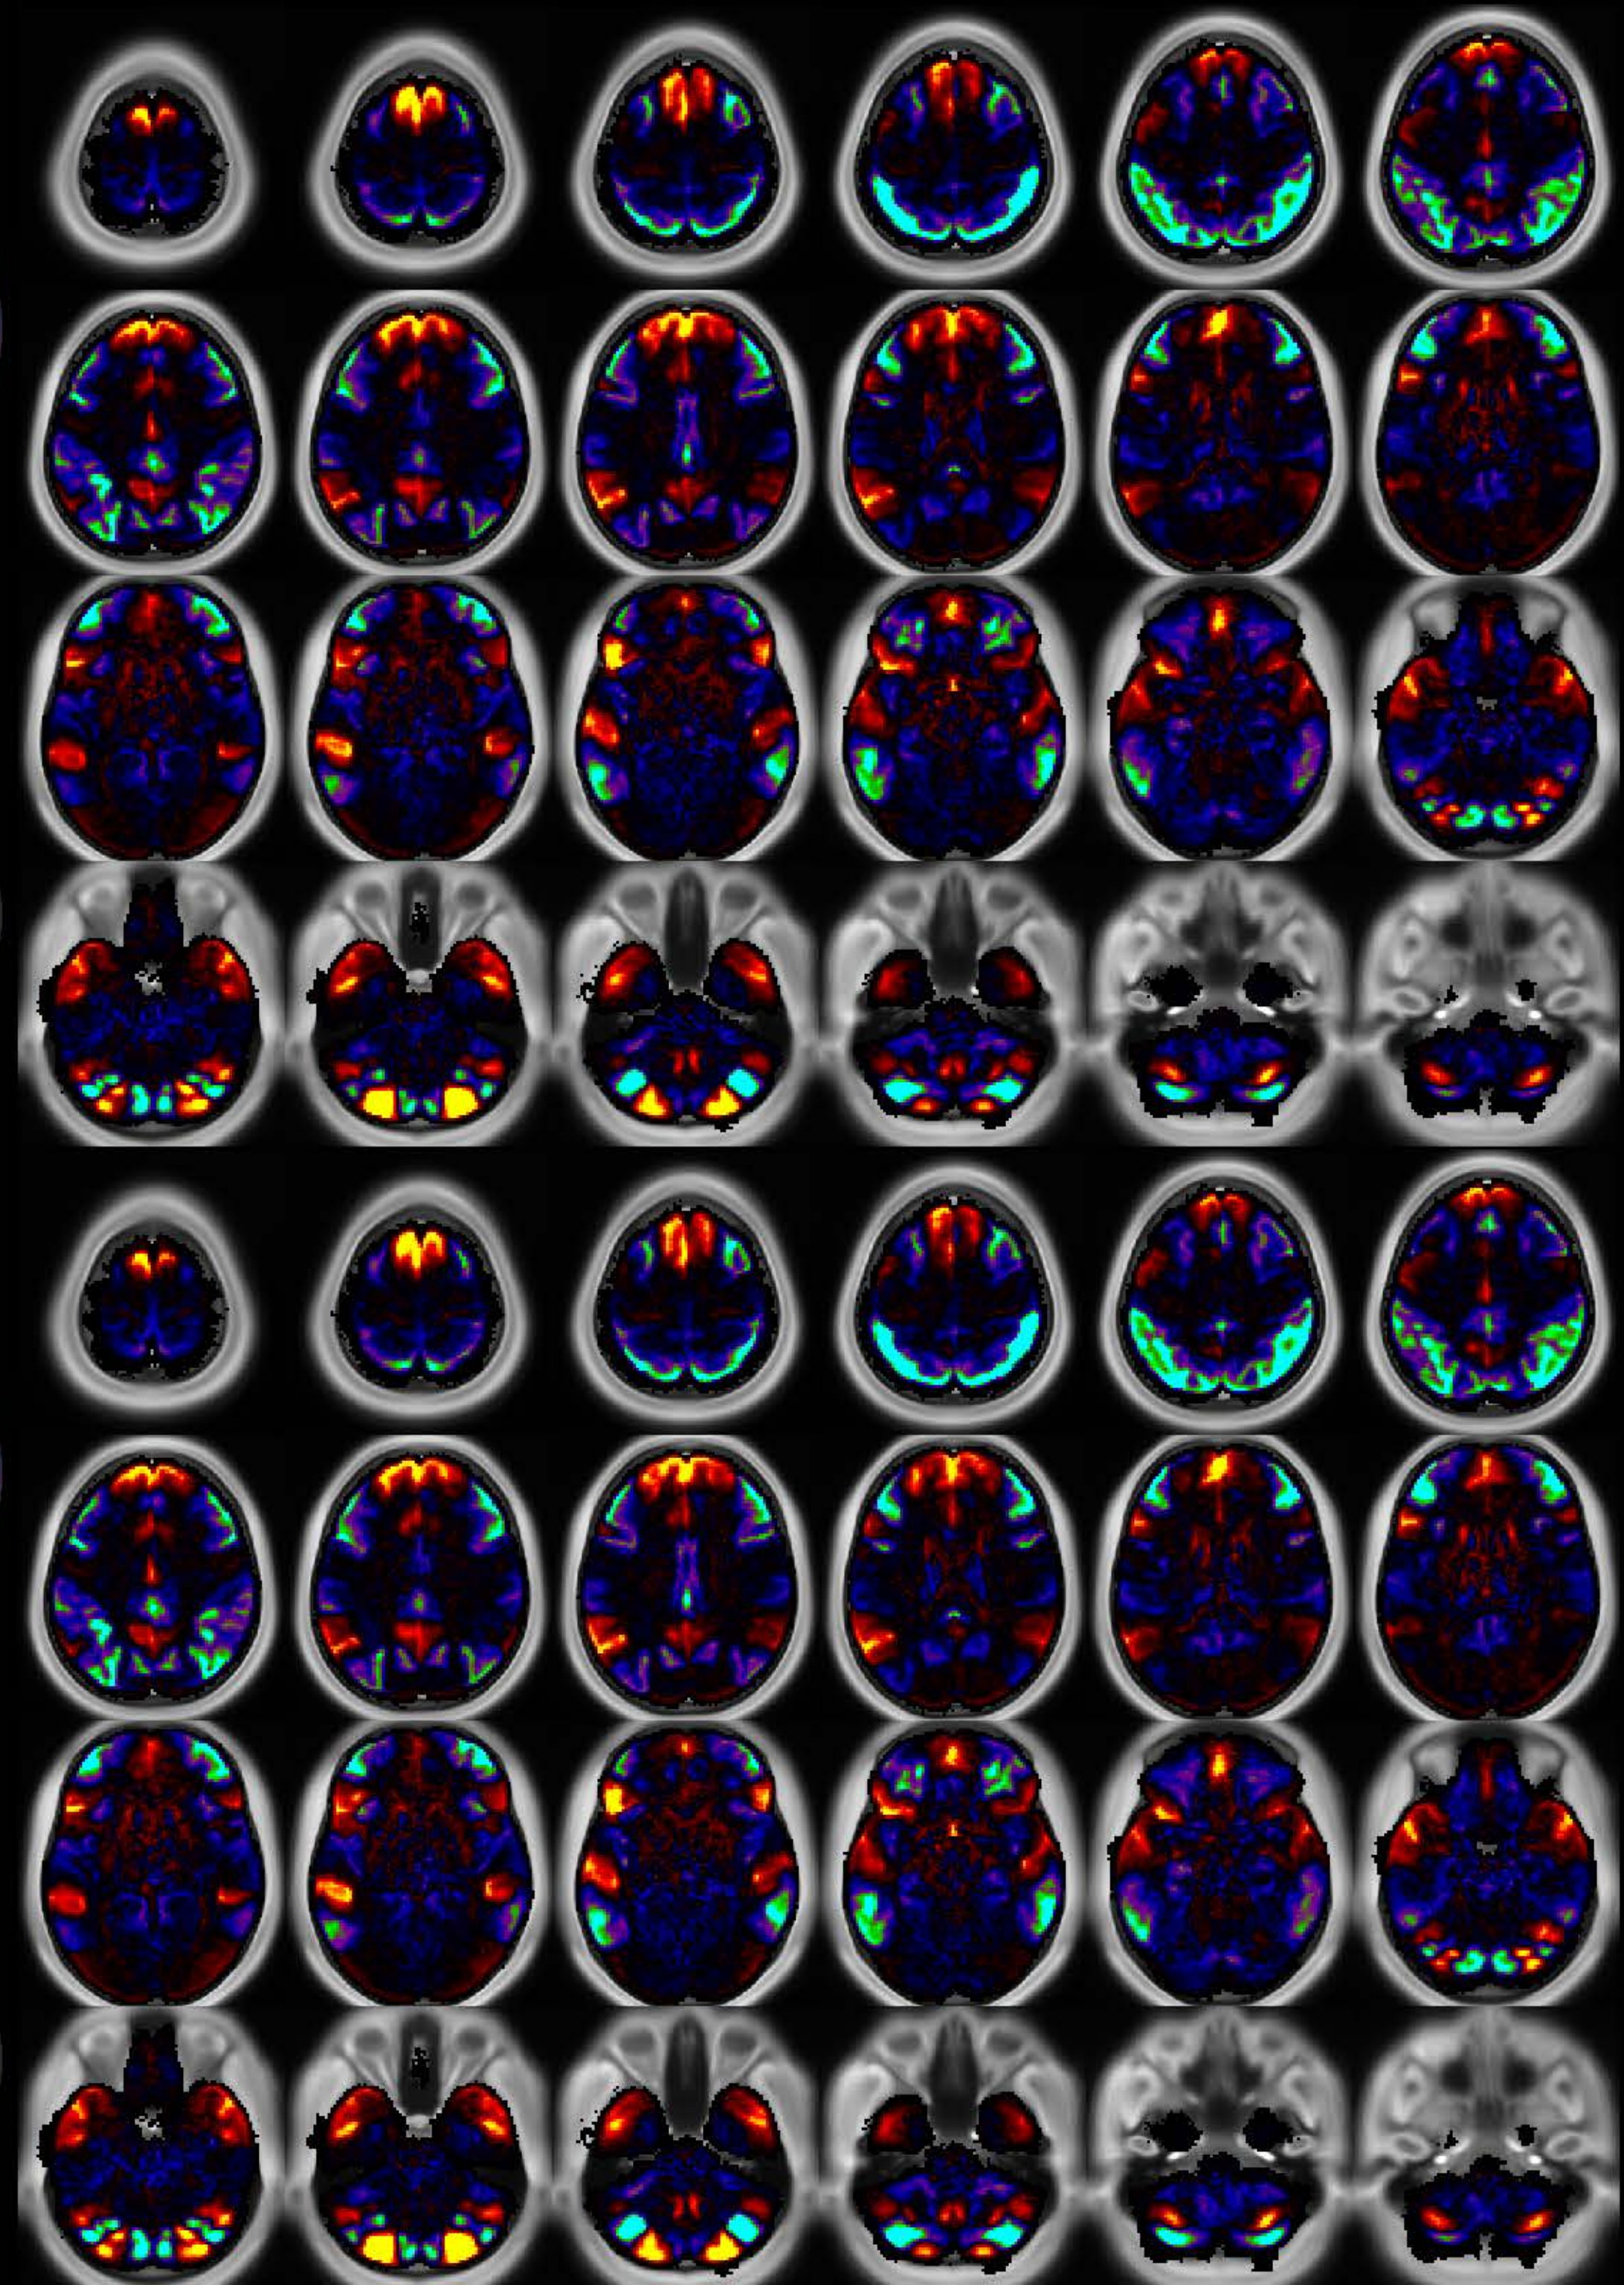

Seconds

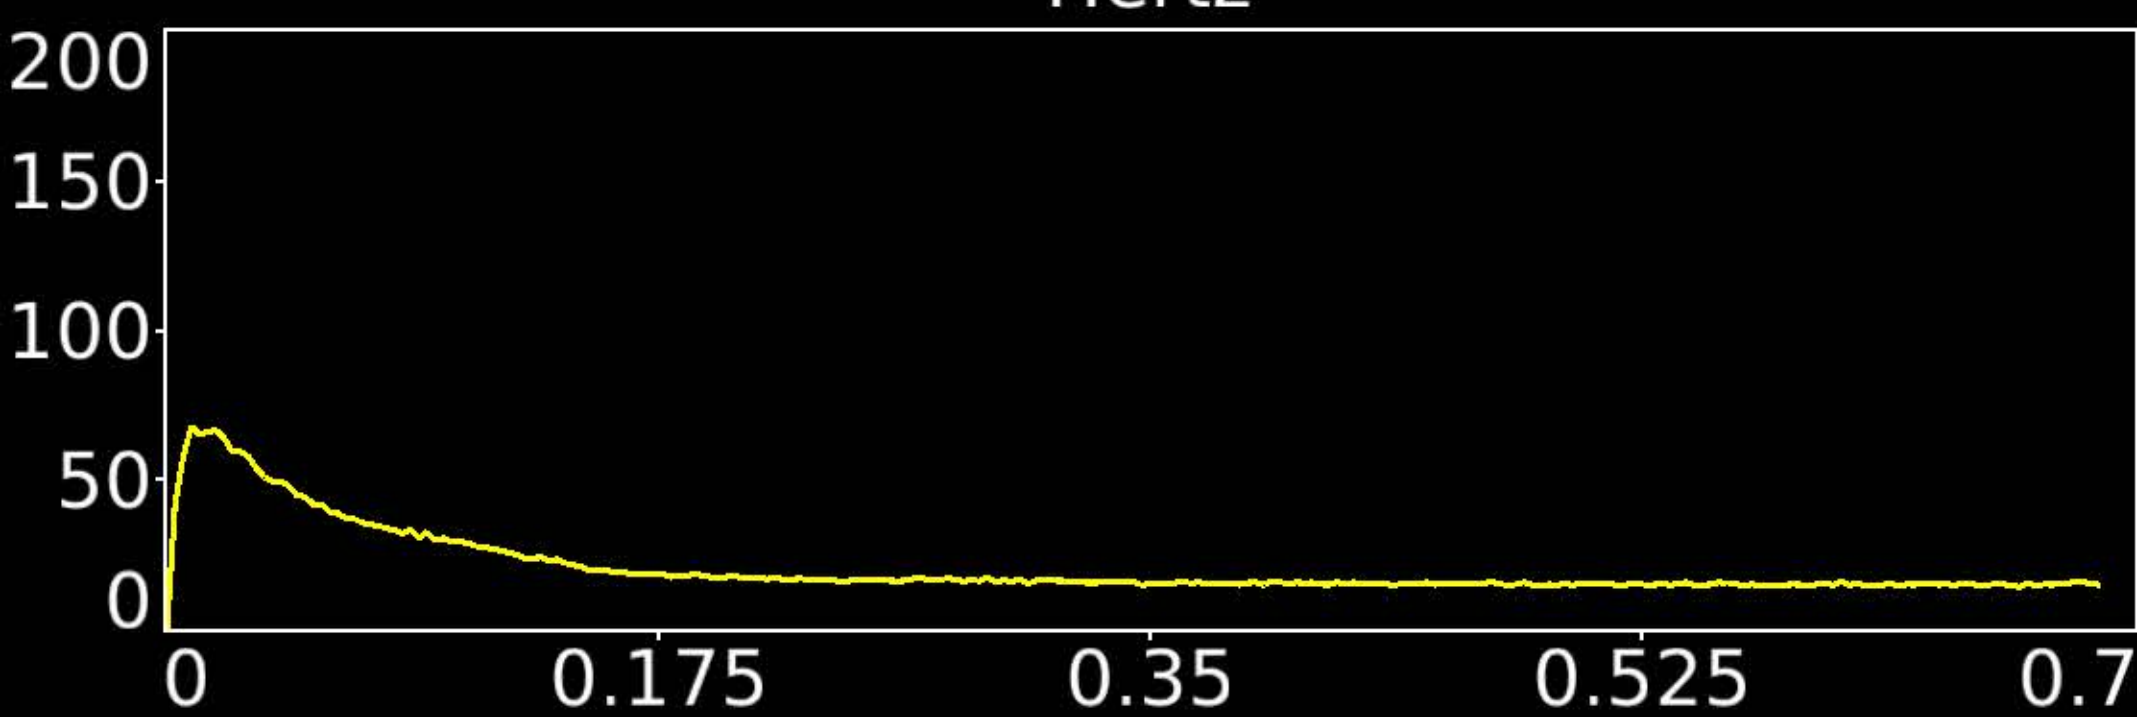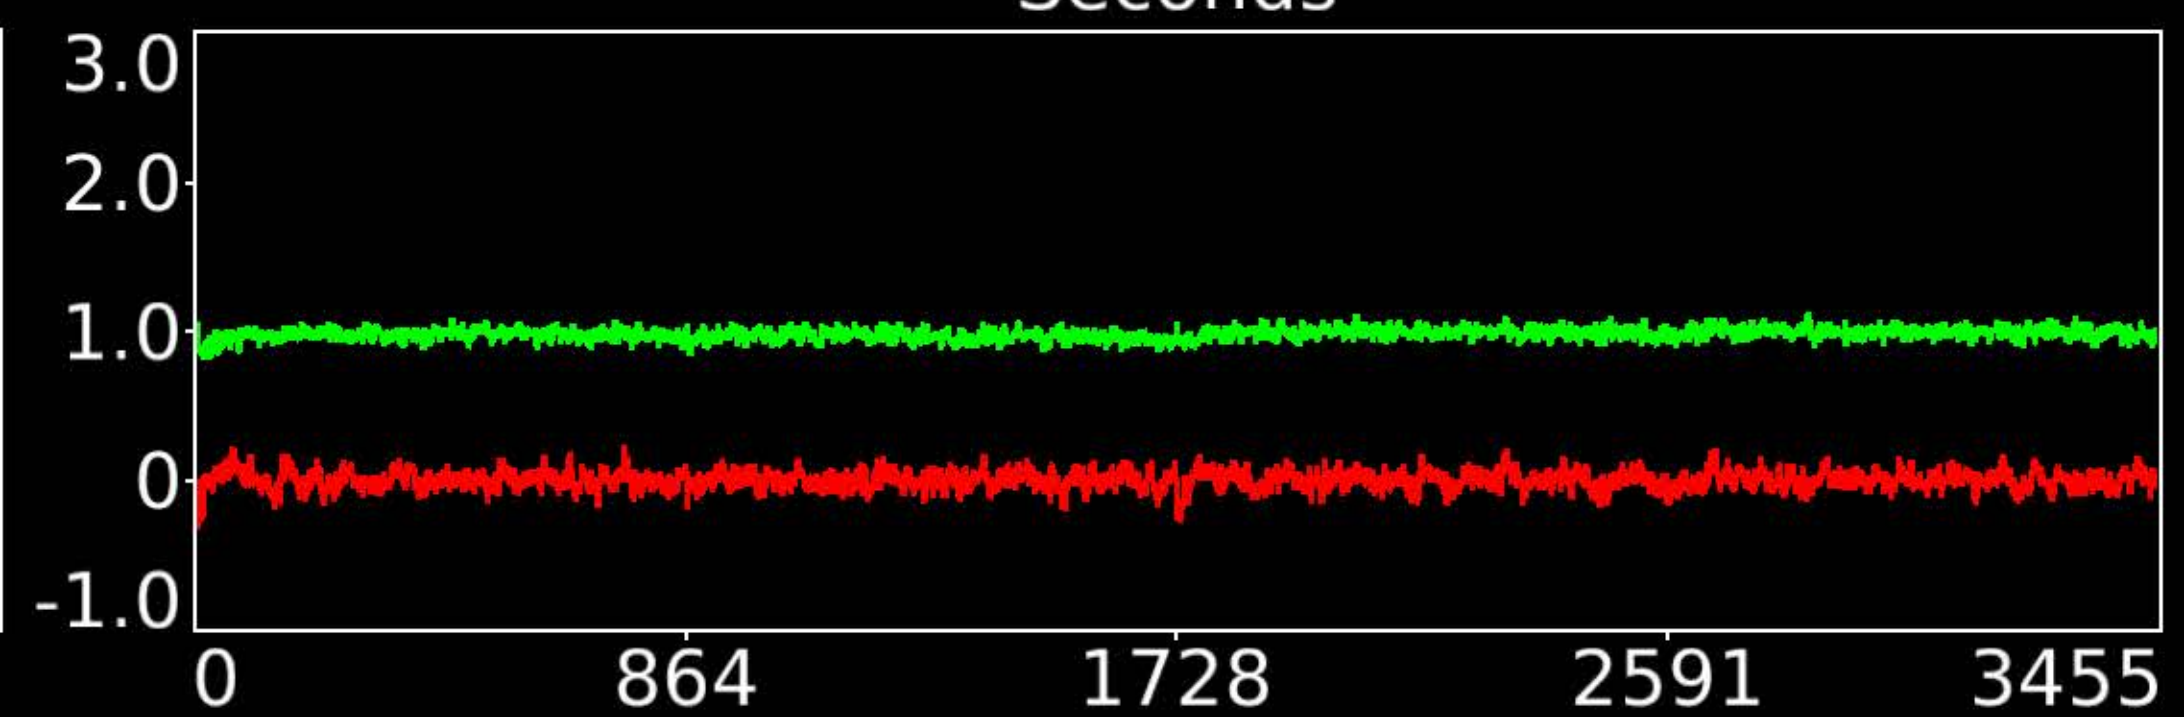

|                           |                            |                                           |  |
|---------------------------|----------------------------|-------------------------------------------|--|
| Number & Class: 20 Signal |                            | Name: Left Lateralized Language Network I |  |
| RVT Correlated: No        | DVARS Dip Associated: No   | Cross-Subject Variable: No                |  |
| Single Subject: No        | % Variance Explained: 1.49 | Globality Index: 1                        |  |
| Task Component: 22+36     | Taskr Component: 30+32     | Sleep Noted: No                           |  |

Rationale: Spatial map includes positive and negative patches that respect known areal boundaries (e.g. 44; 45; 55b; SFL)



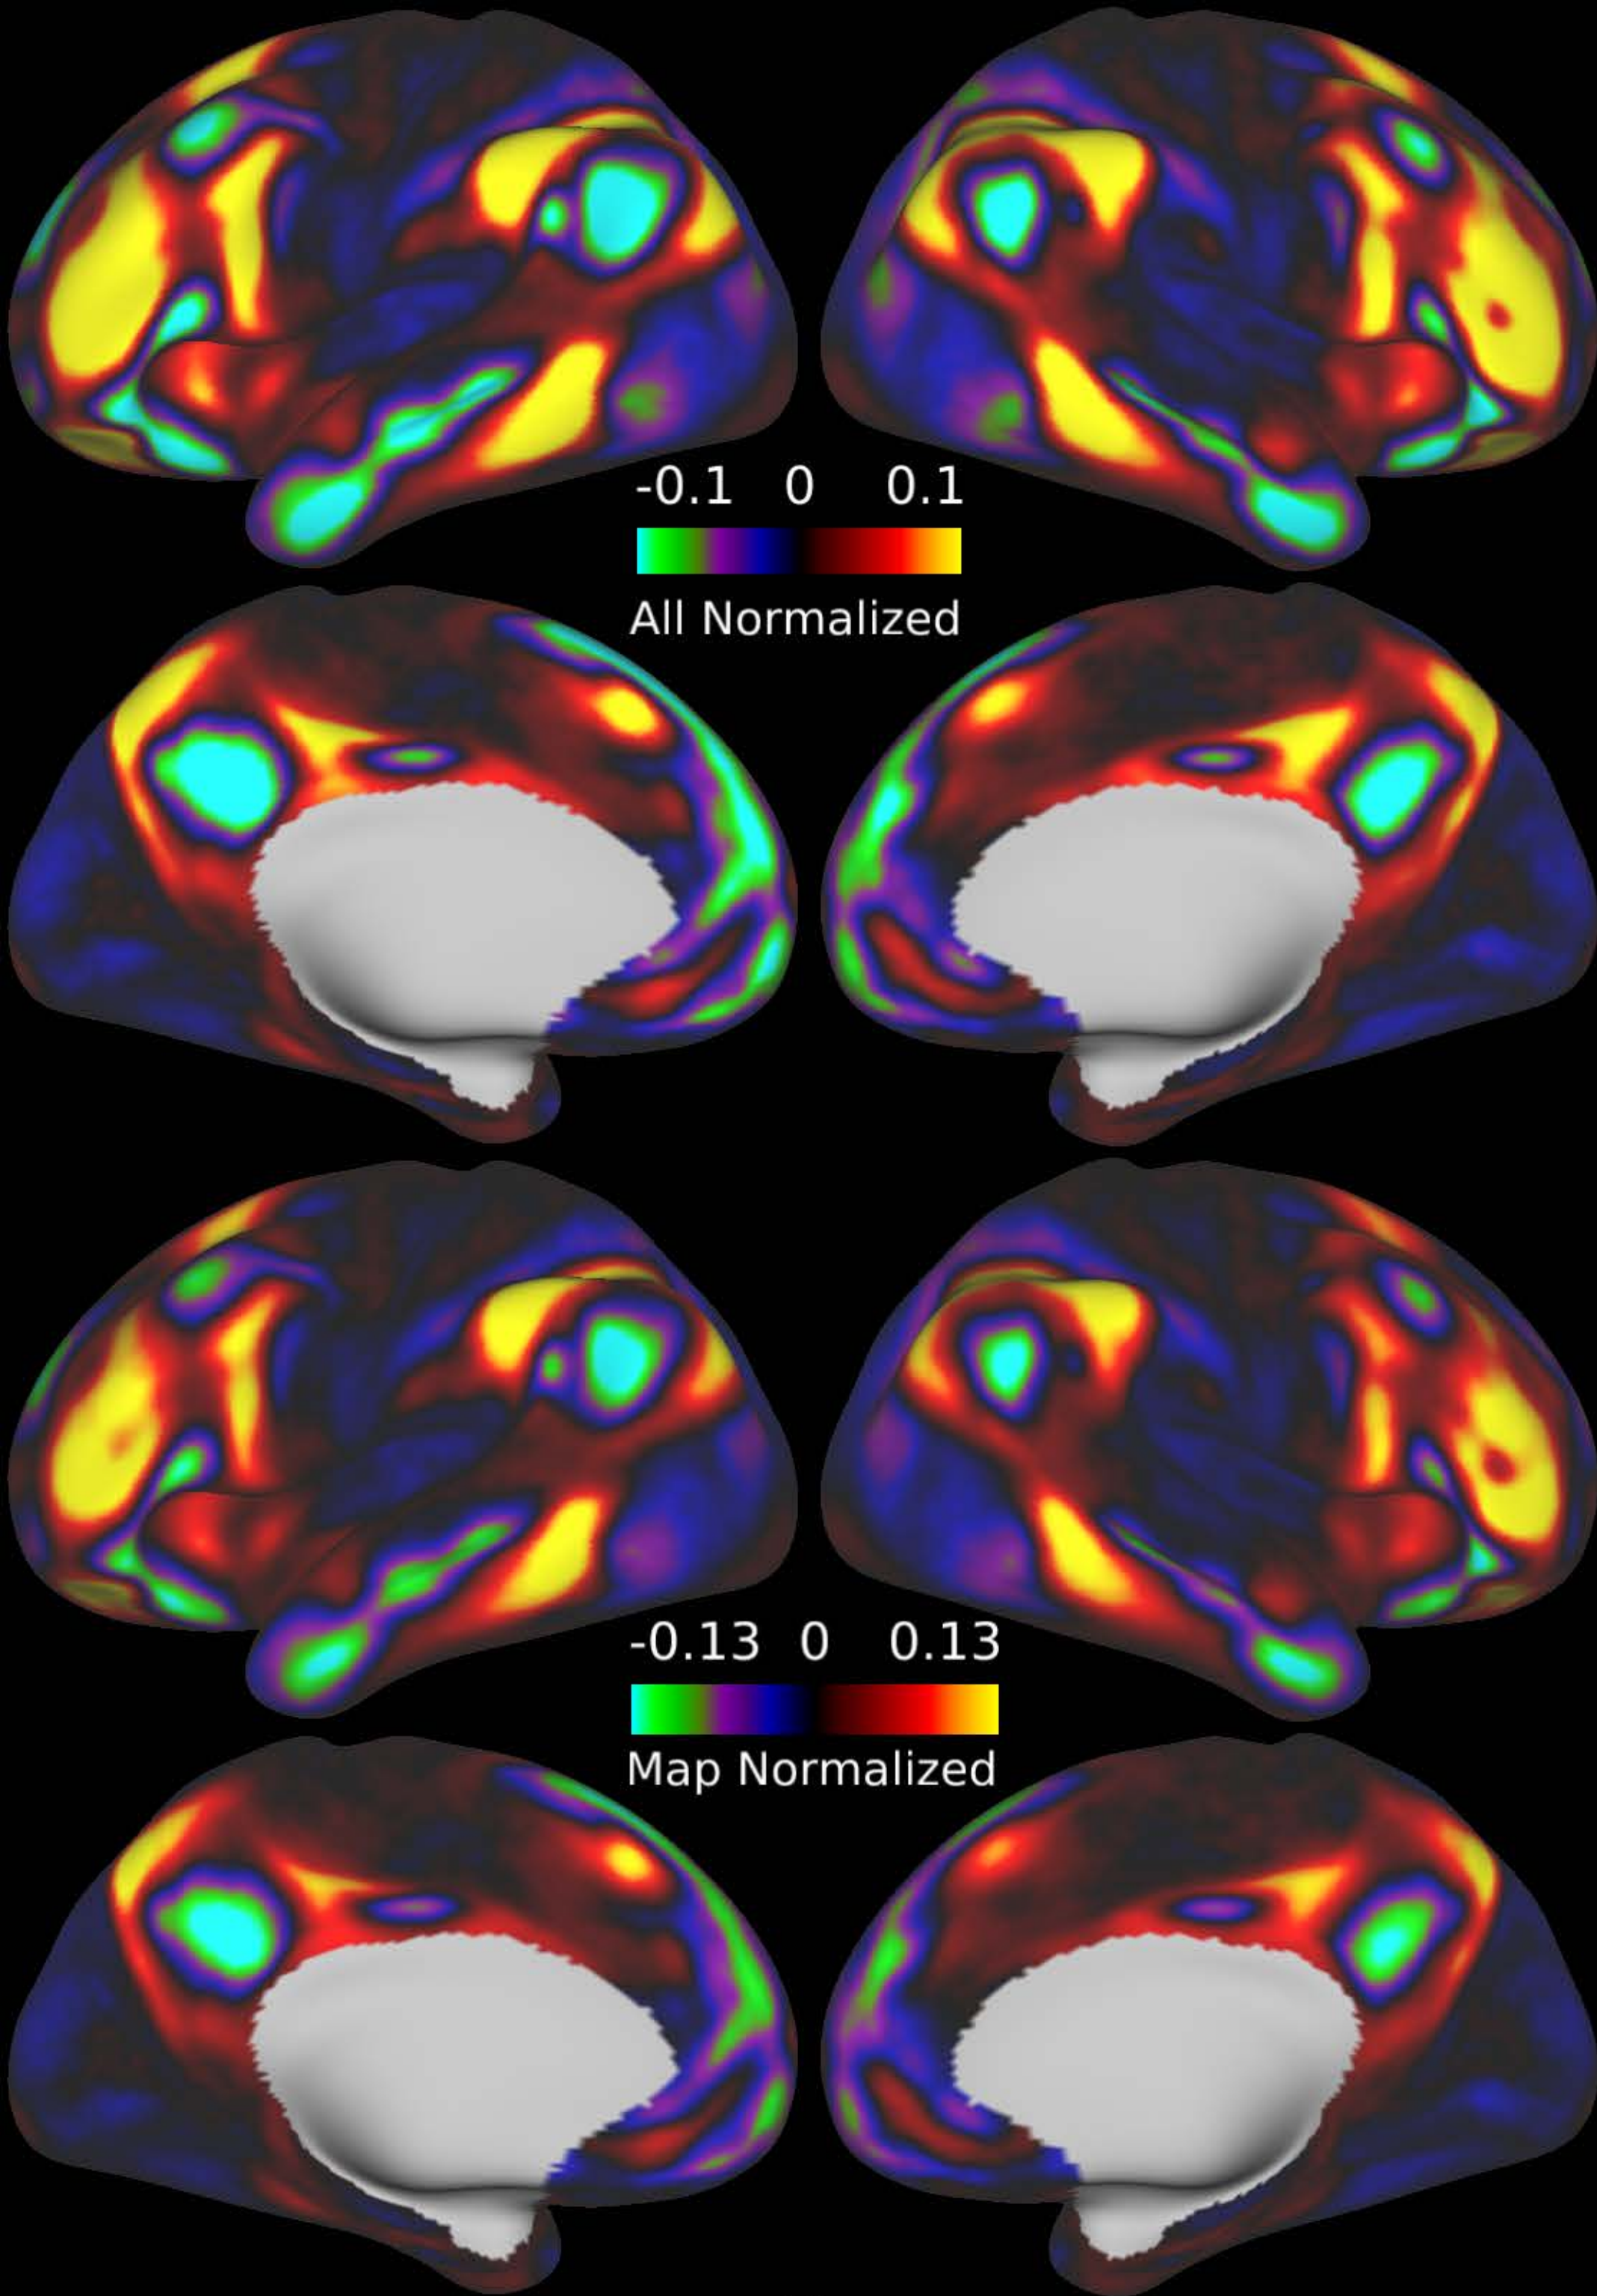

Hertz

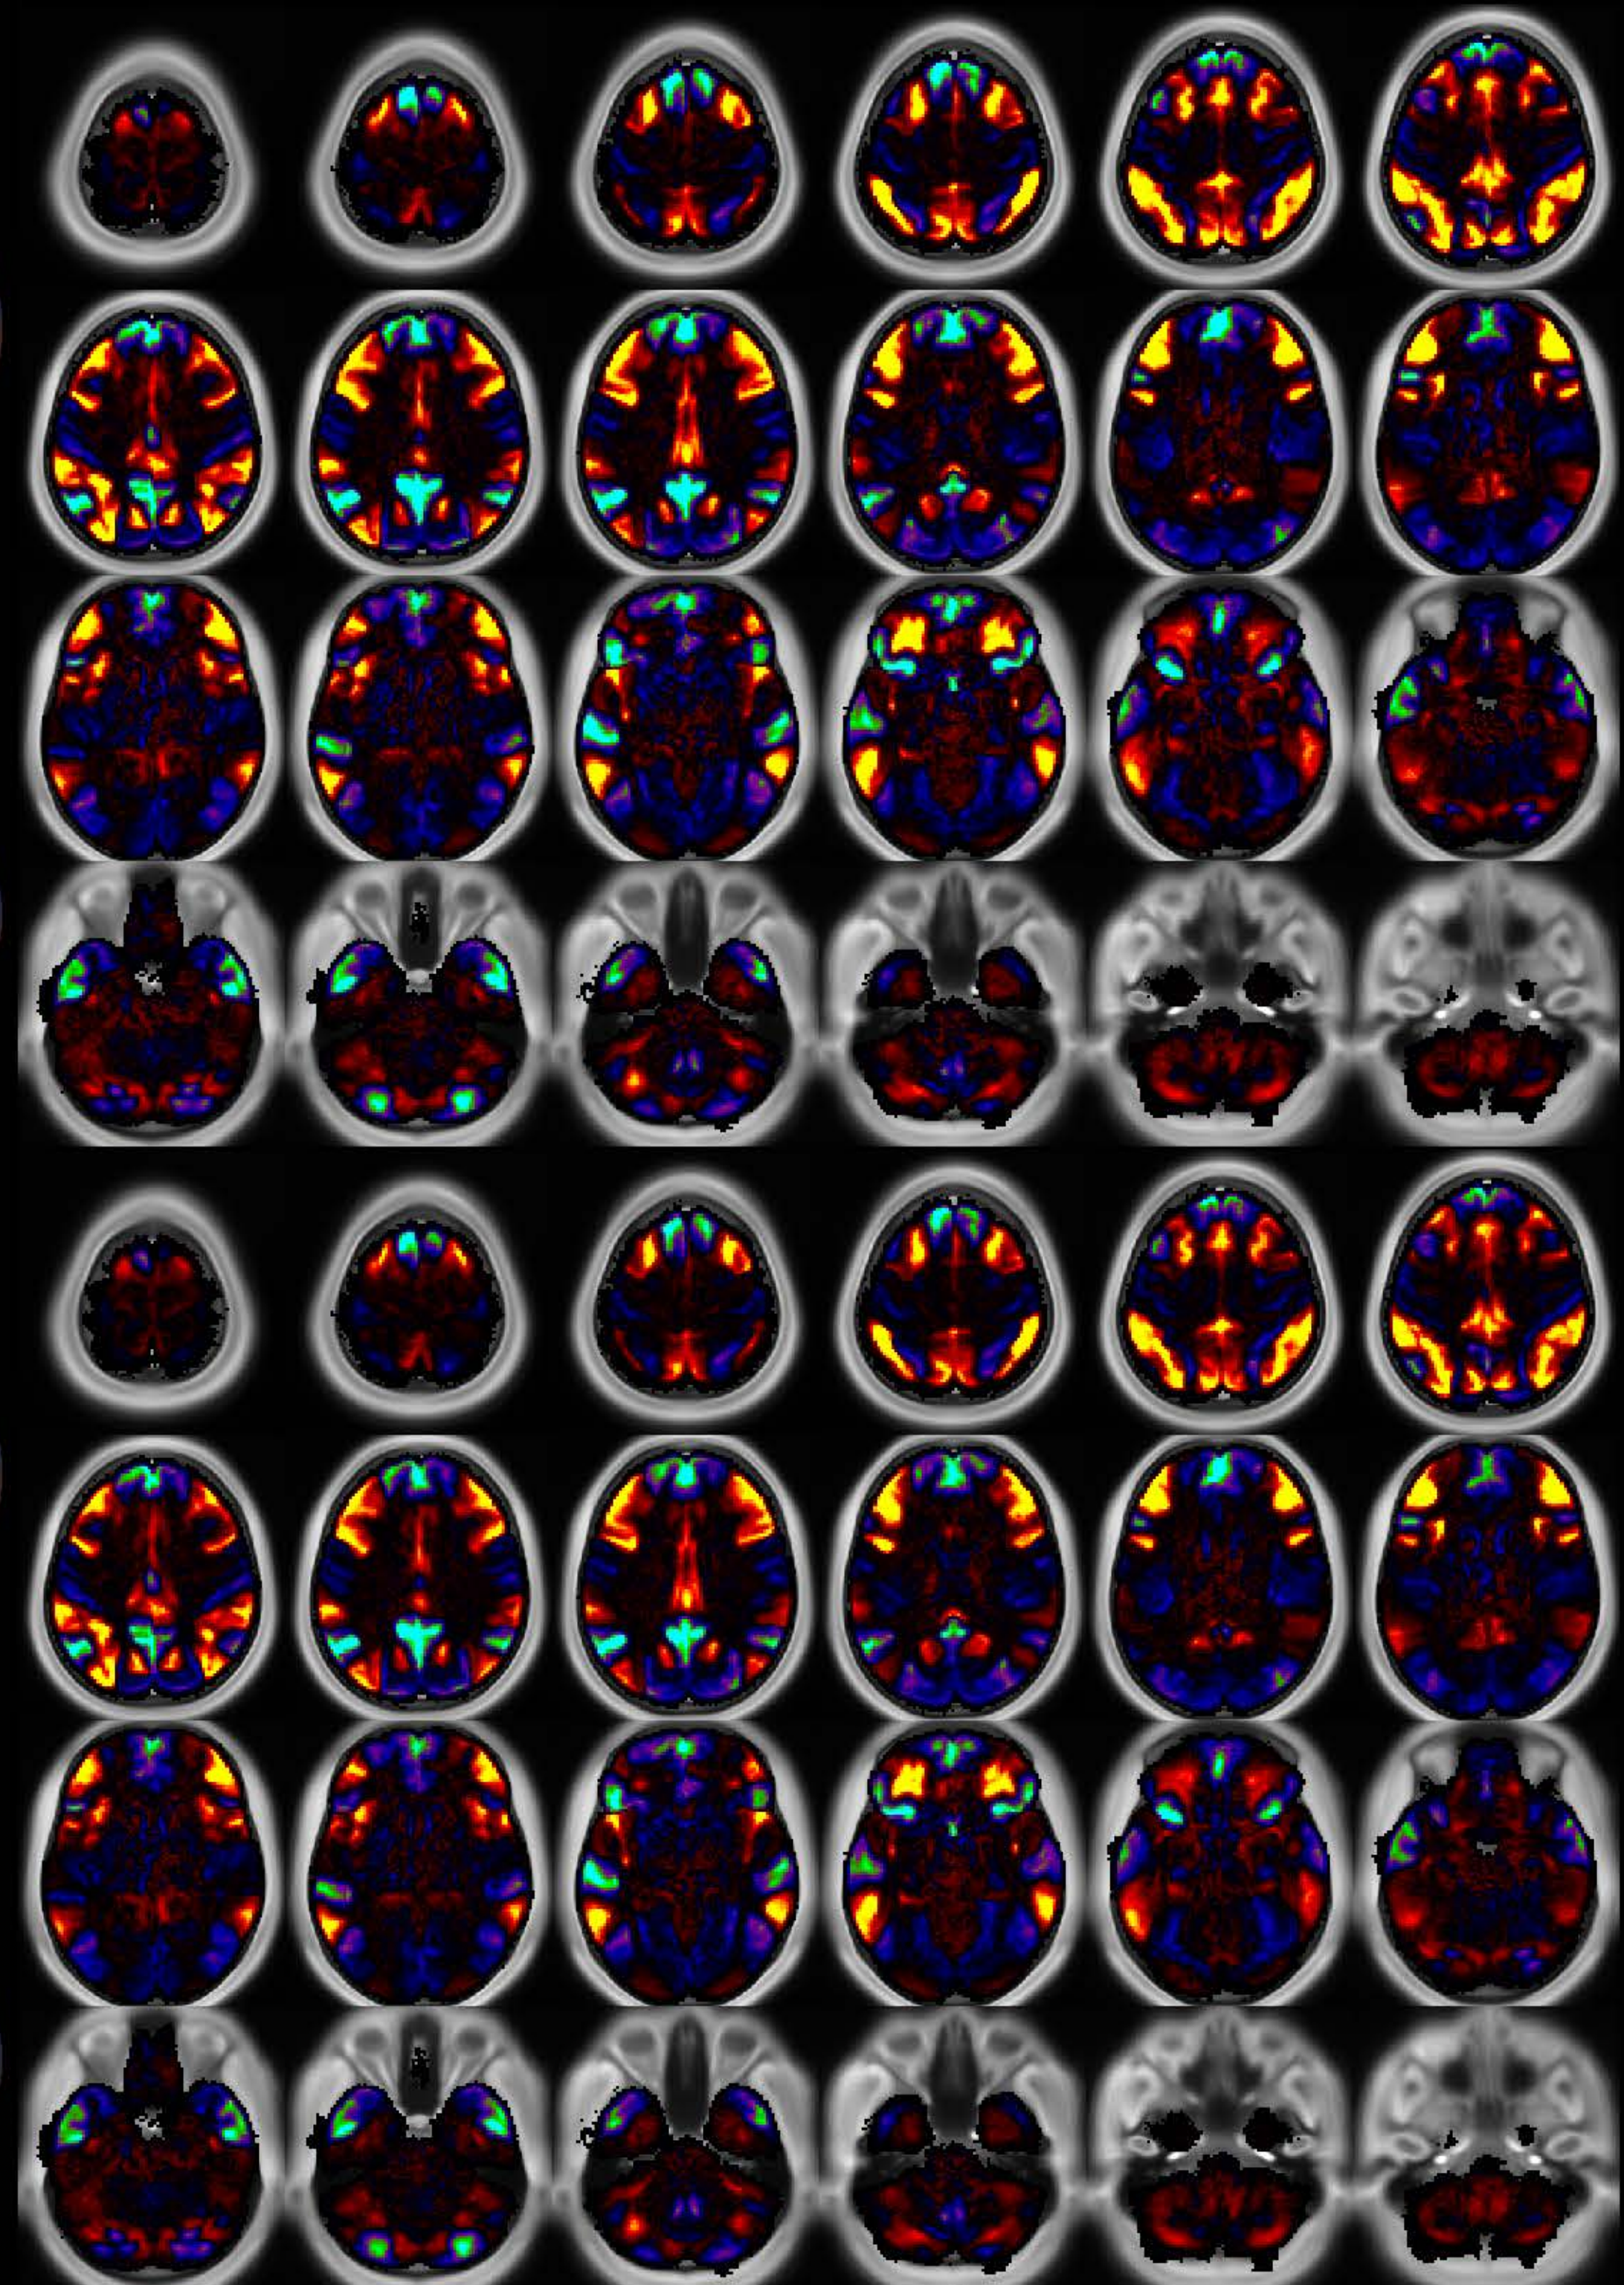

Seconds

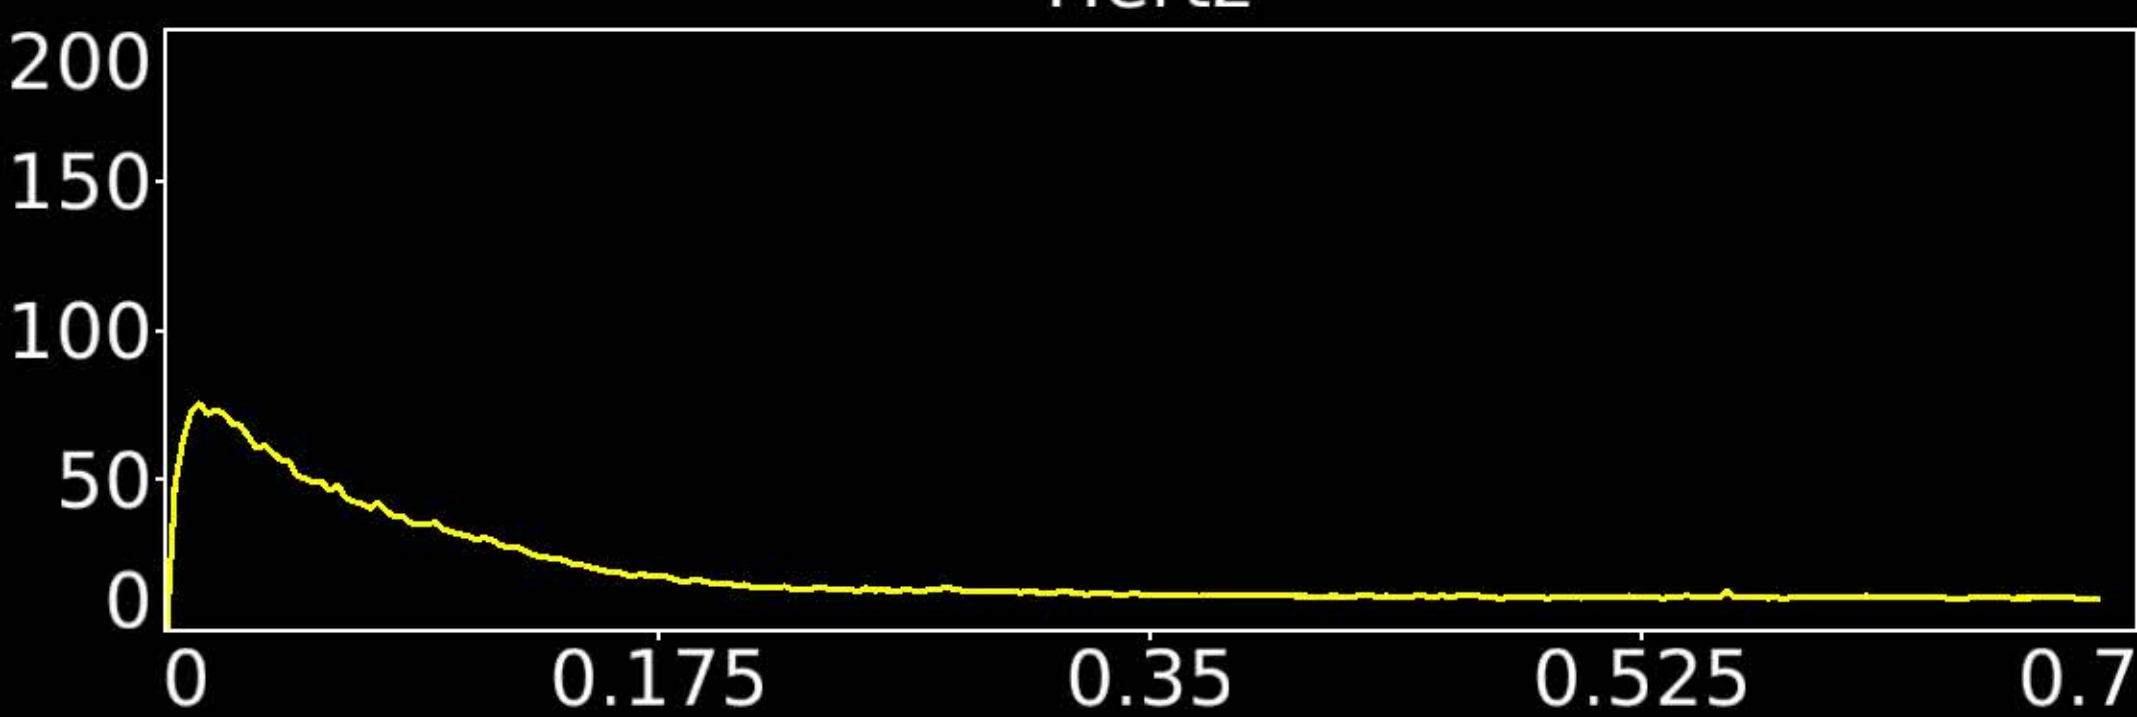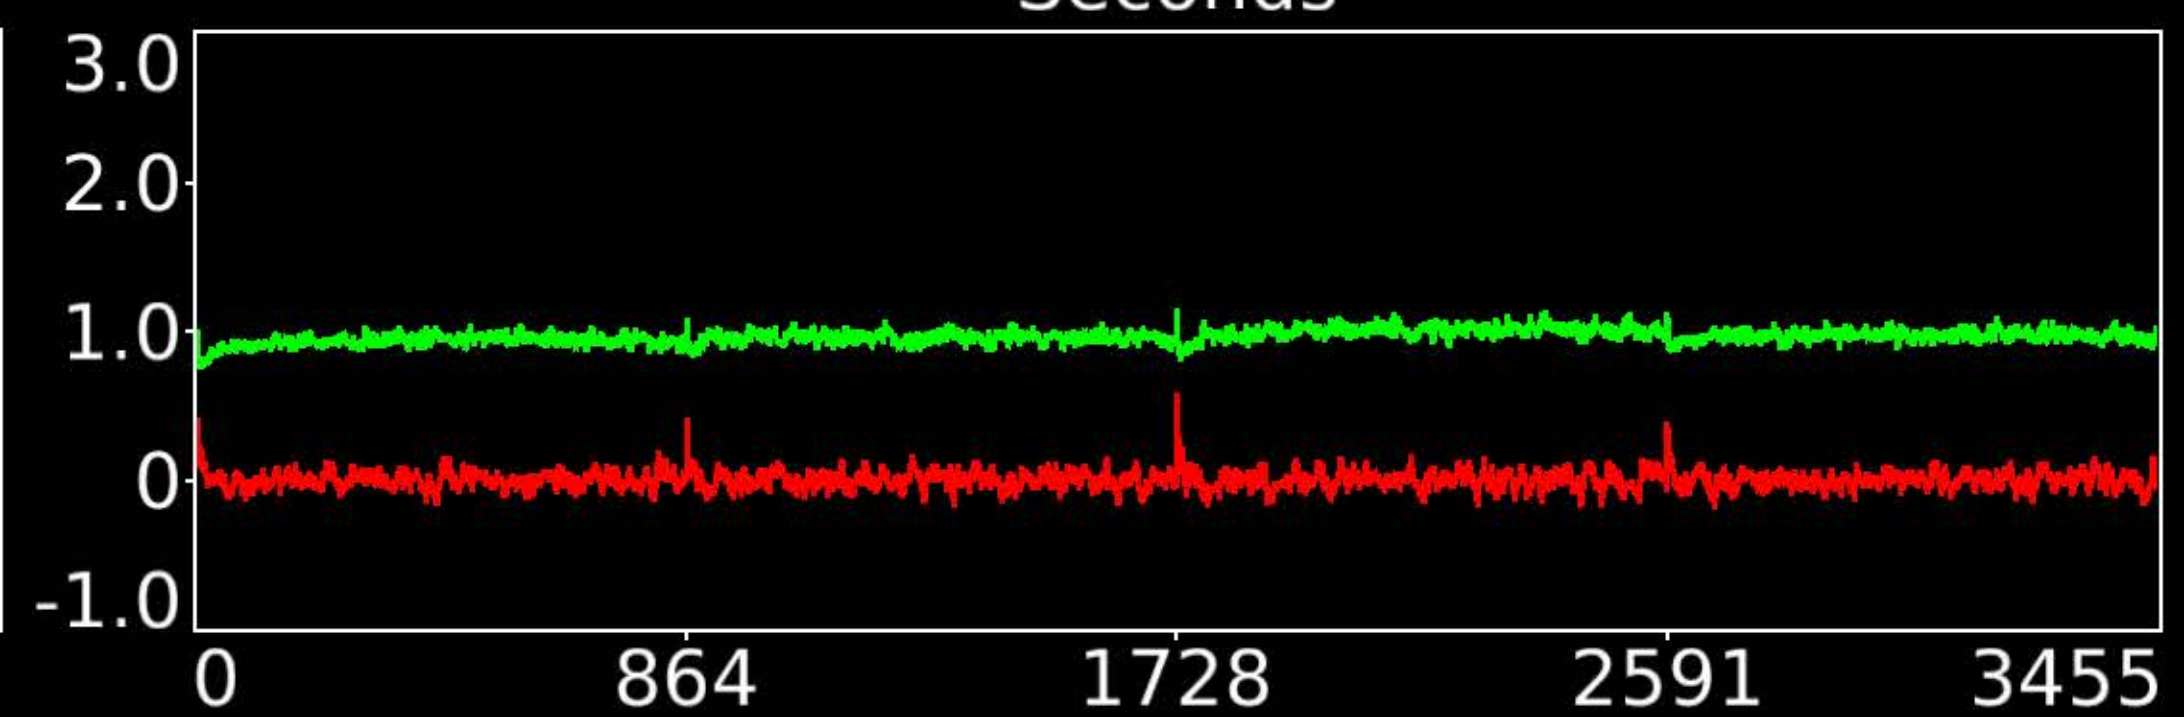

|                           |                            |                                          |  |
|---------------------------|----------------------------|------------------------------------------|--|
| Number & Class: 21 Signal |                            | Name: Subsidiary Fronto-Parietal Network |  |
| RVT Correlated: No        | DVARS Dip Associated: No   | Cross-Subject Variable: No               |  |
| Single Subject: No        | % Variance Explained: 1.46 | Globality Index: 0.32                    |  |
| Task Component: No        | Taskr Component: -13       | Sleep Noted: No                          |  |

Rationale: Spatial map includes positive and negative patches that respect known RSNs (e.g. Fronto-Parietal Network)



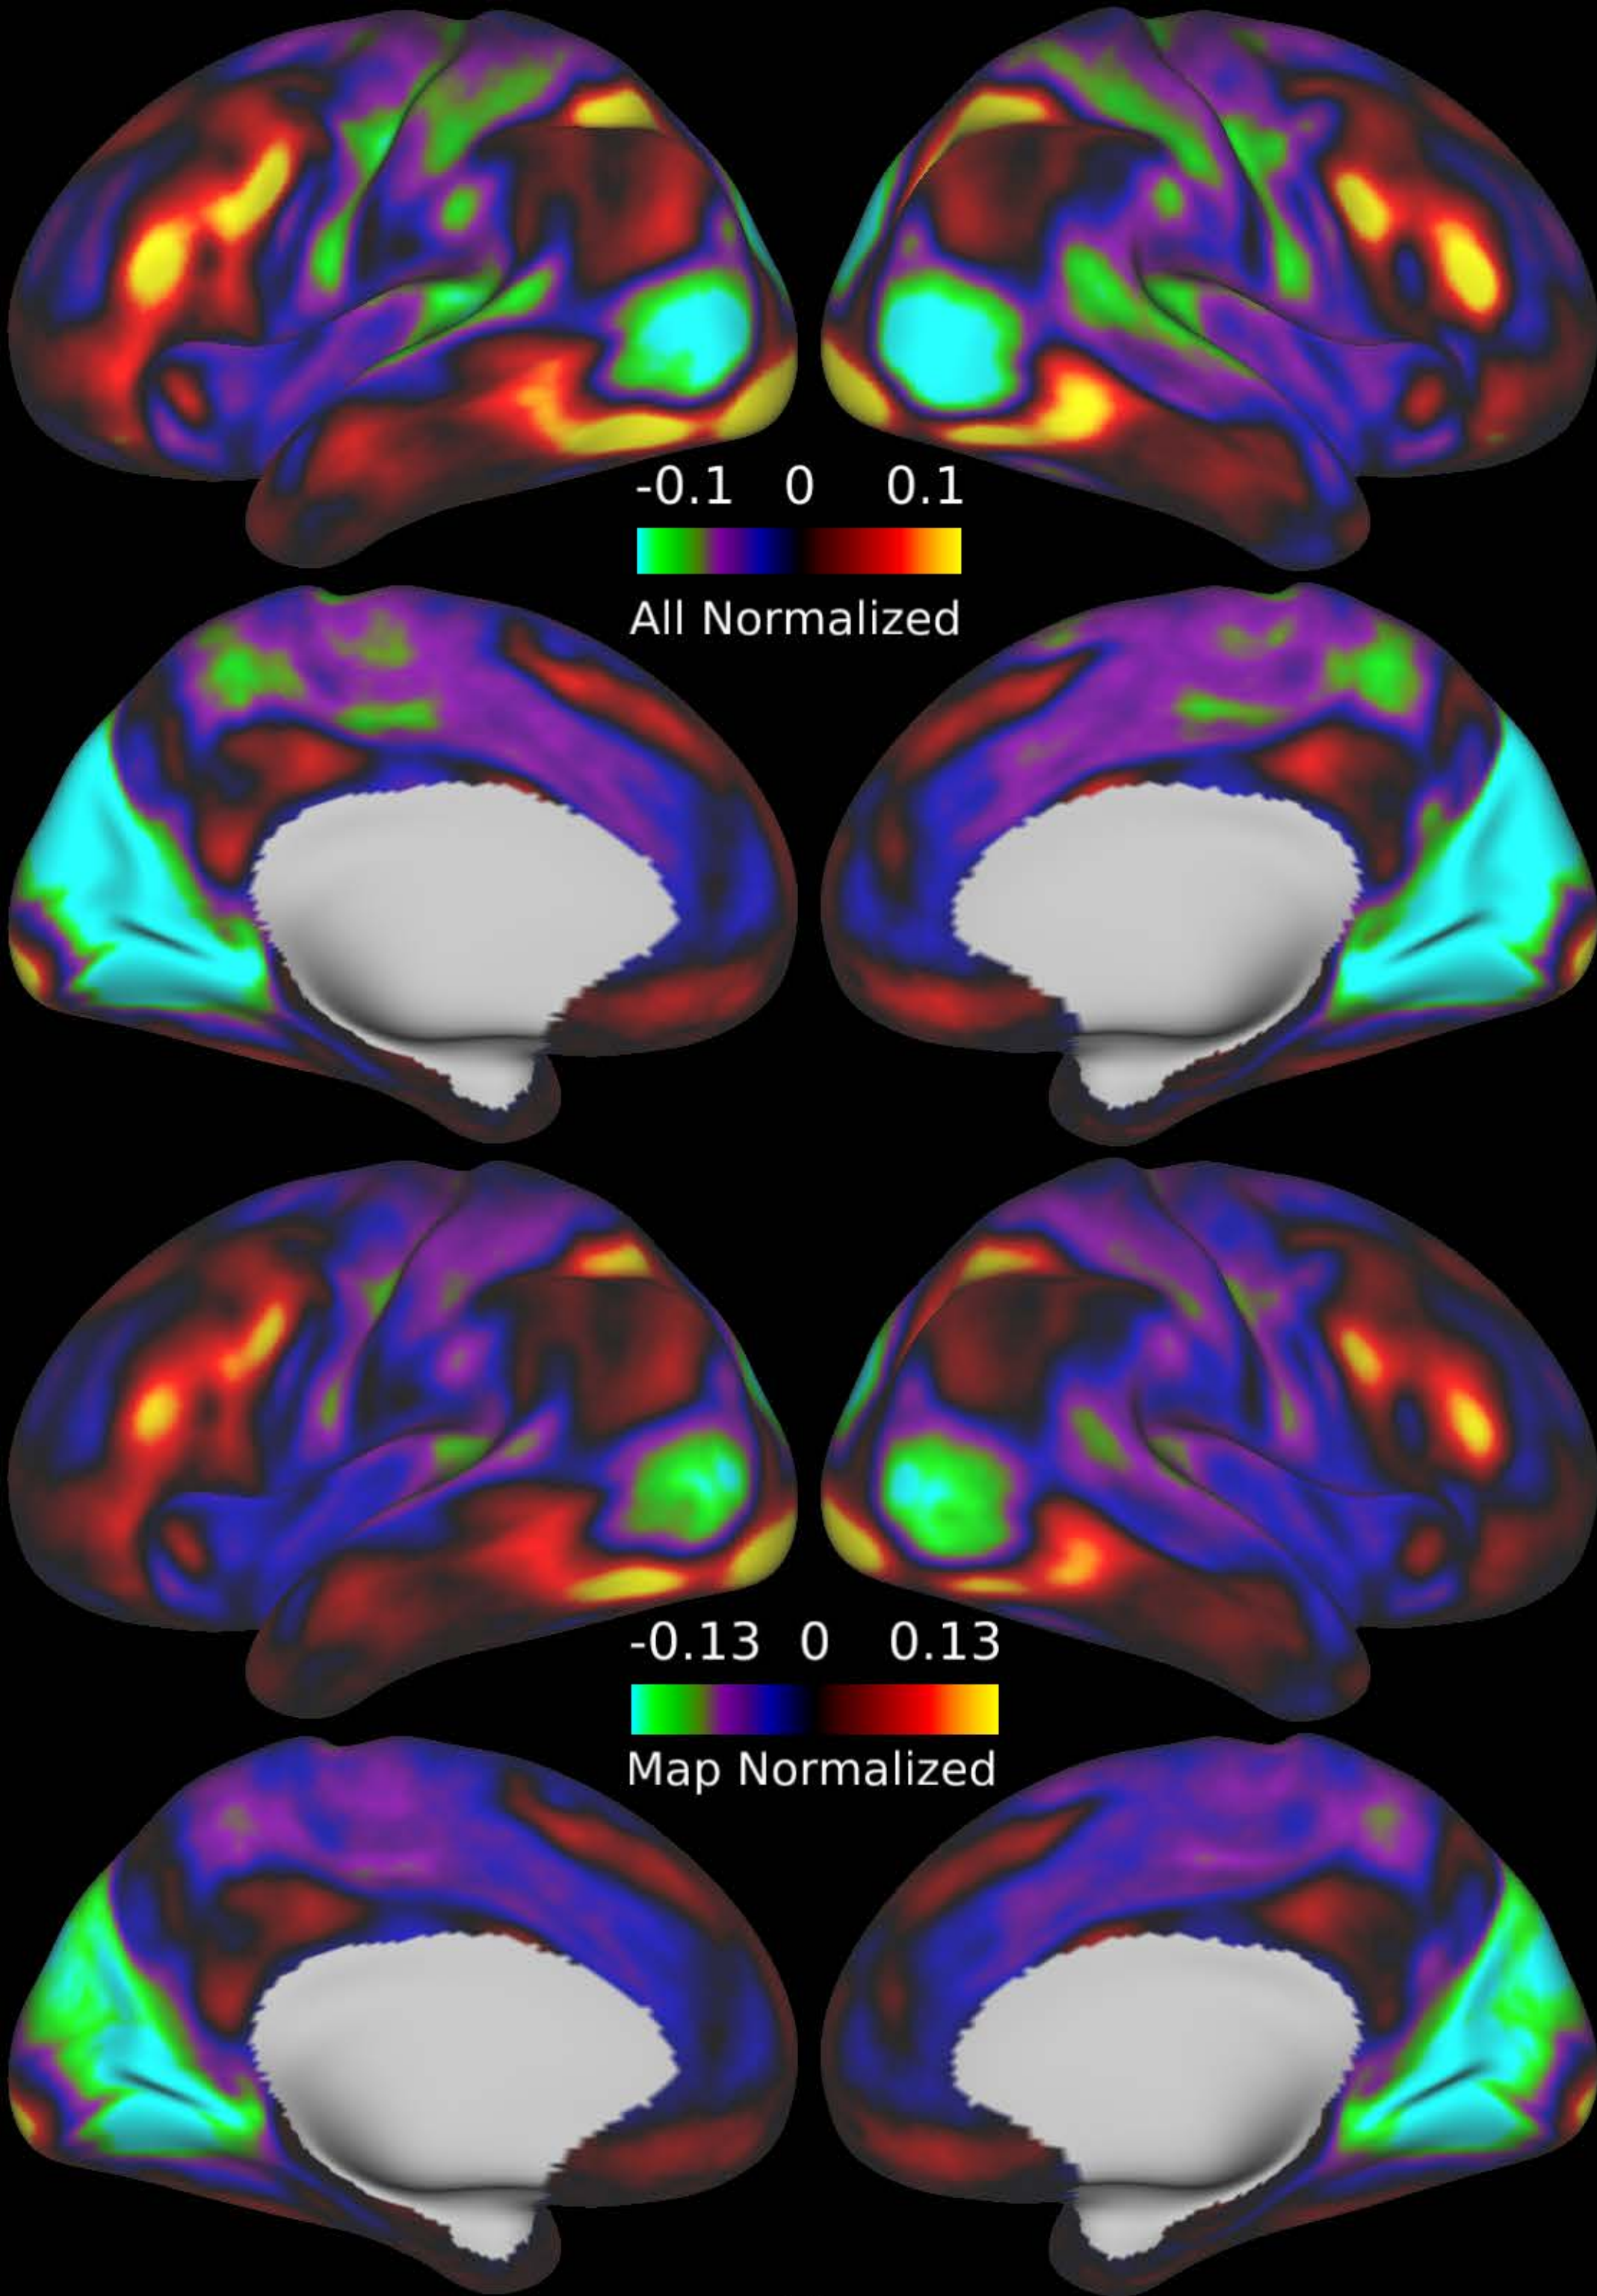

Hertz

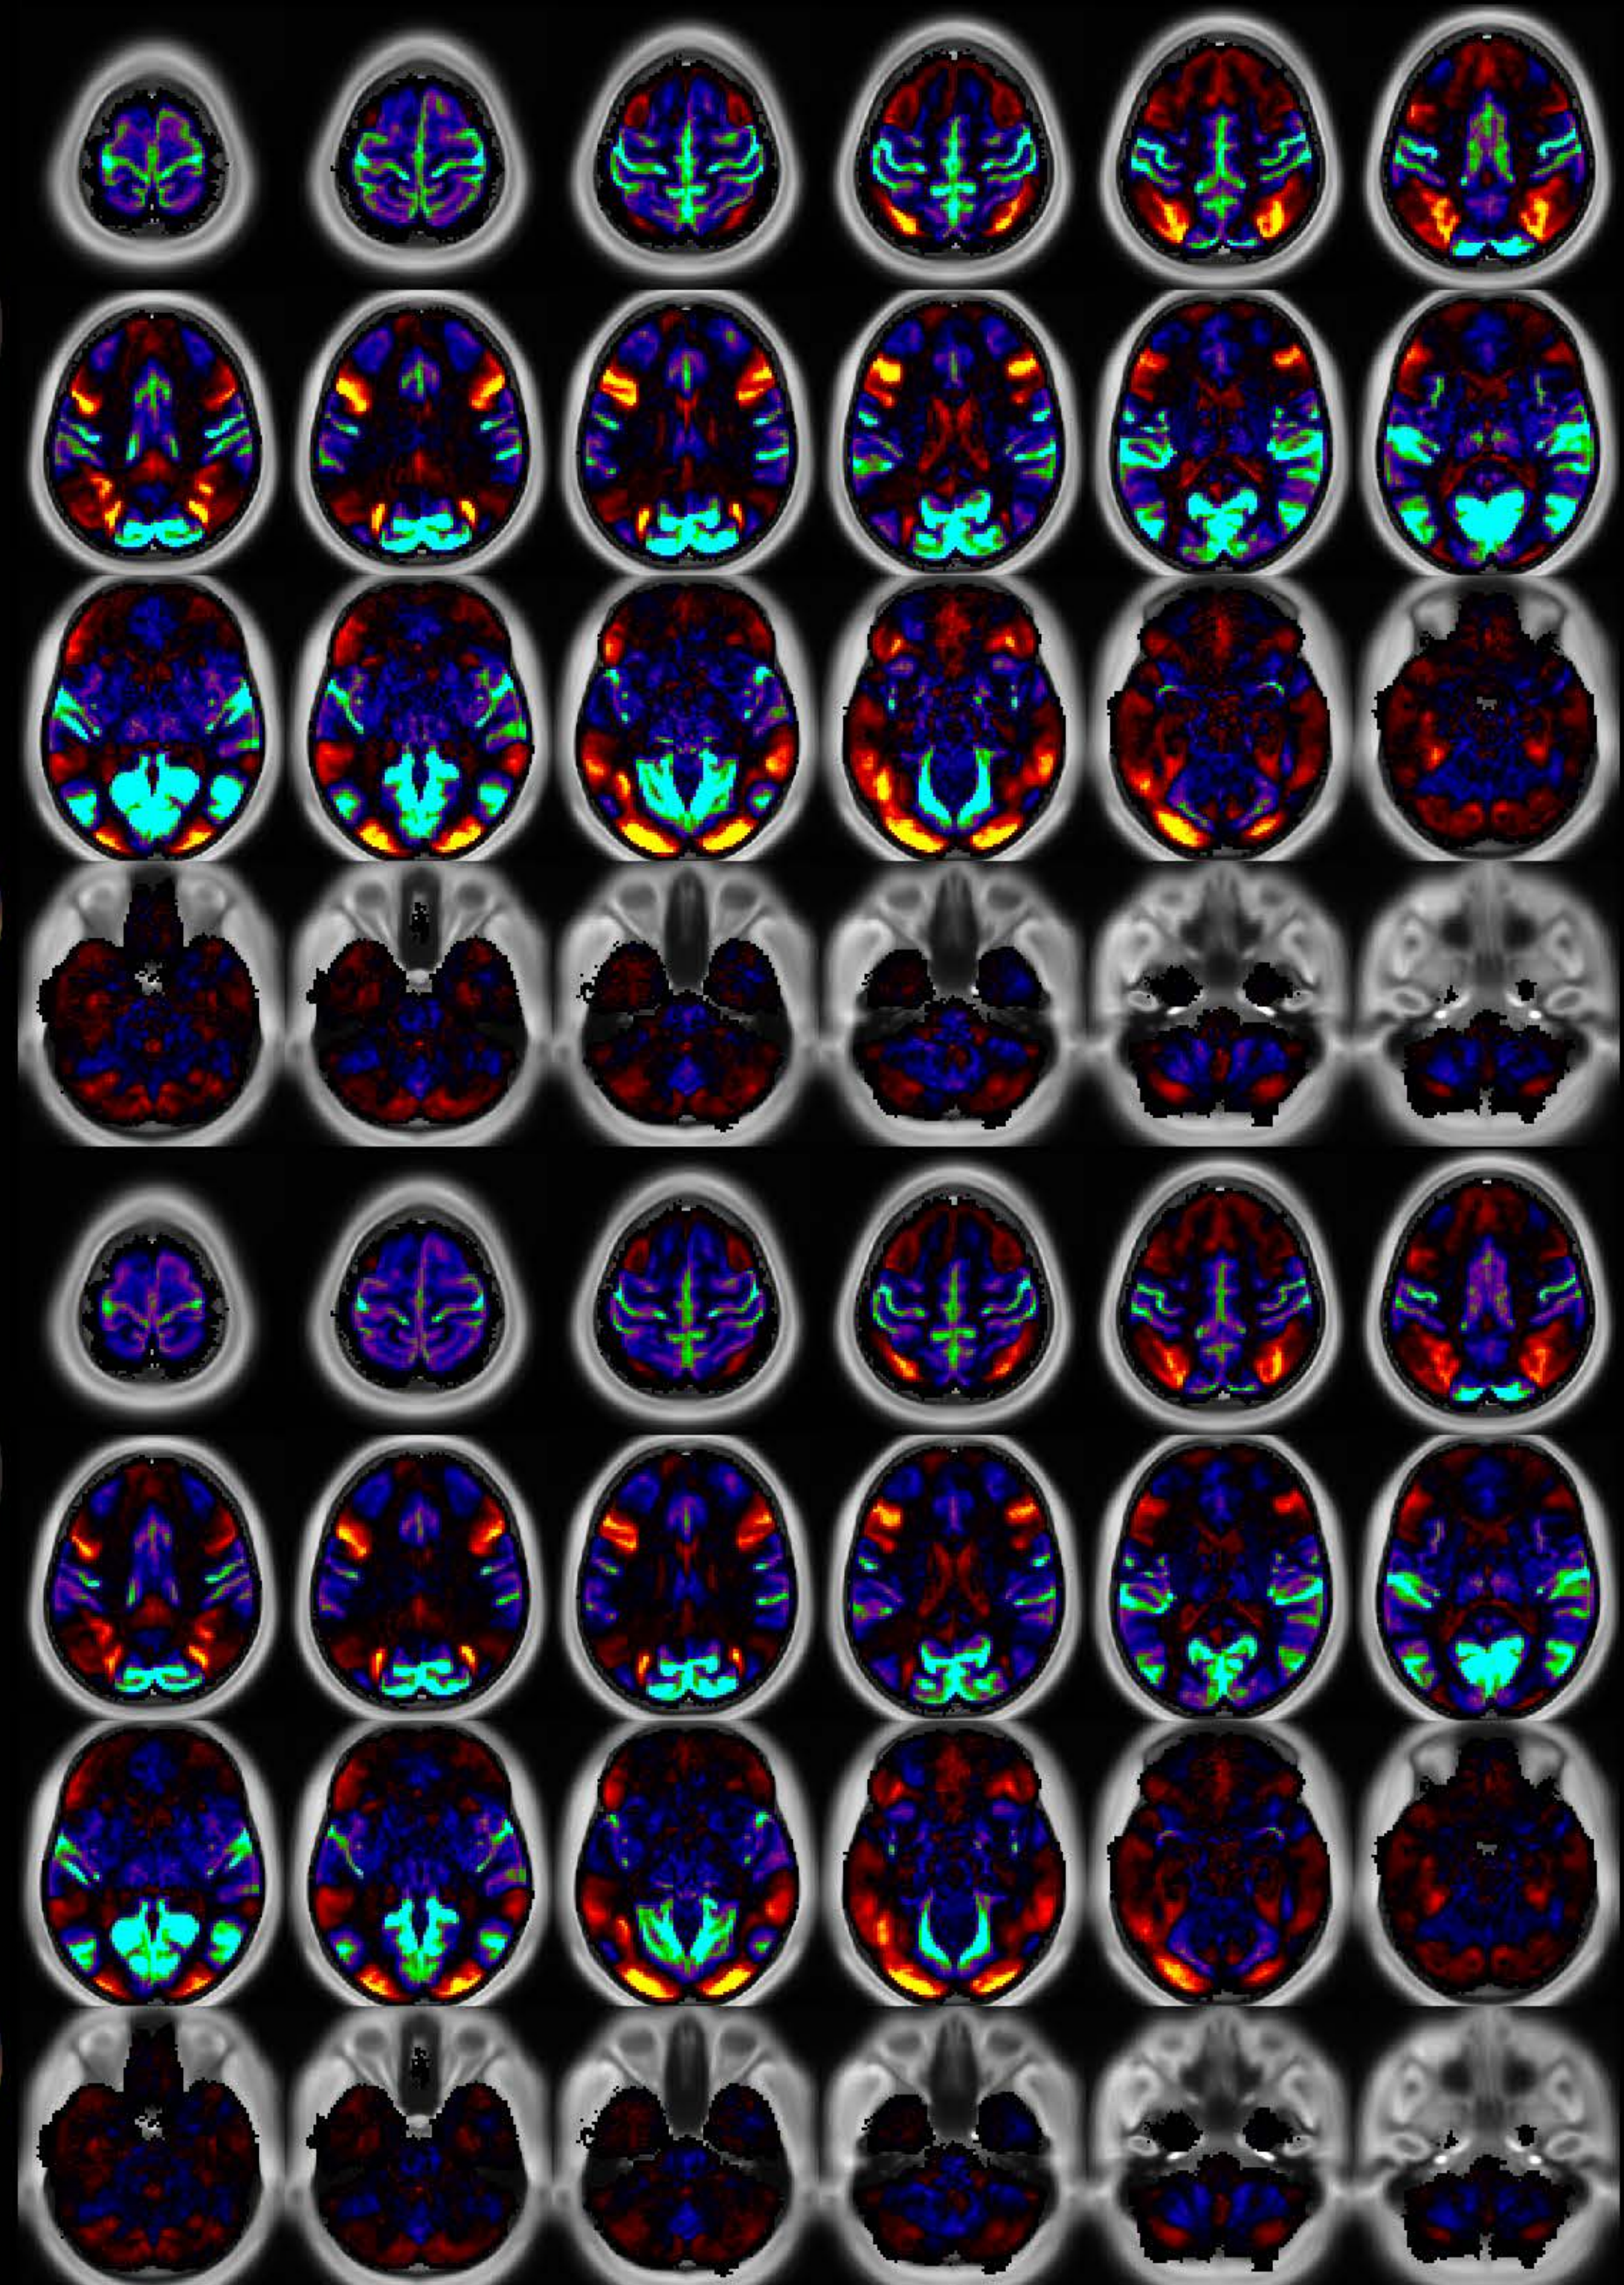

Seconds

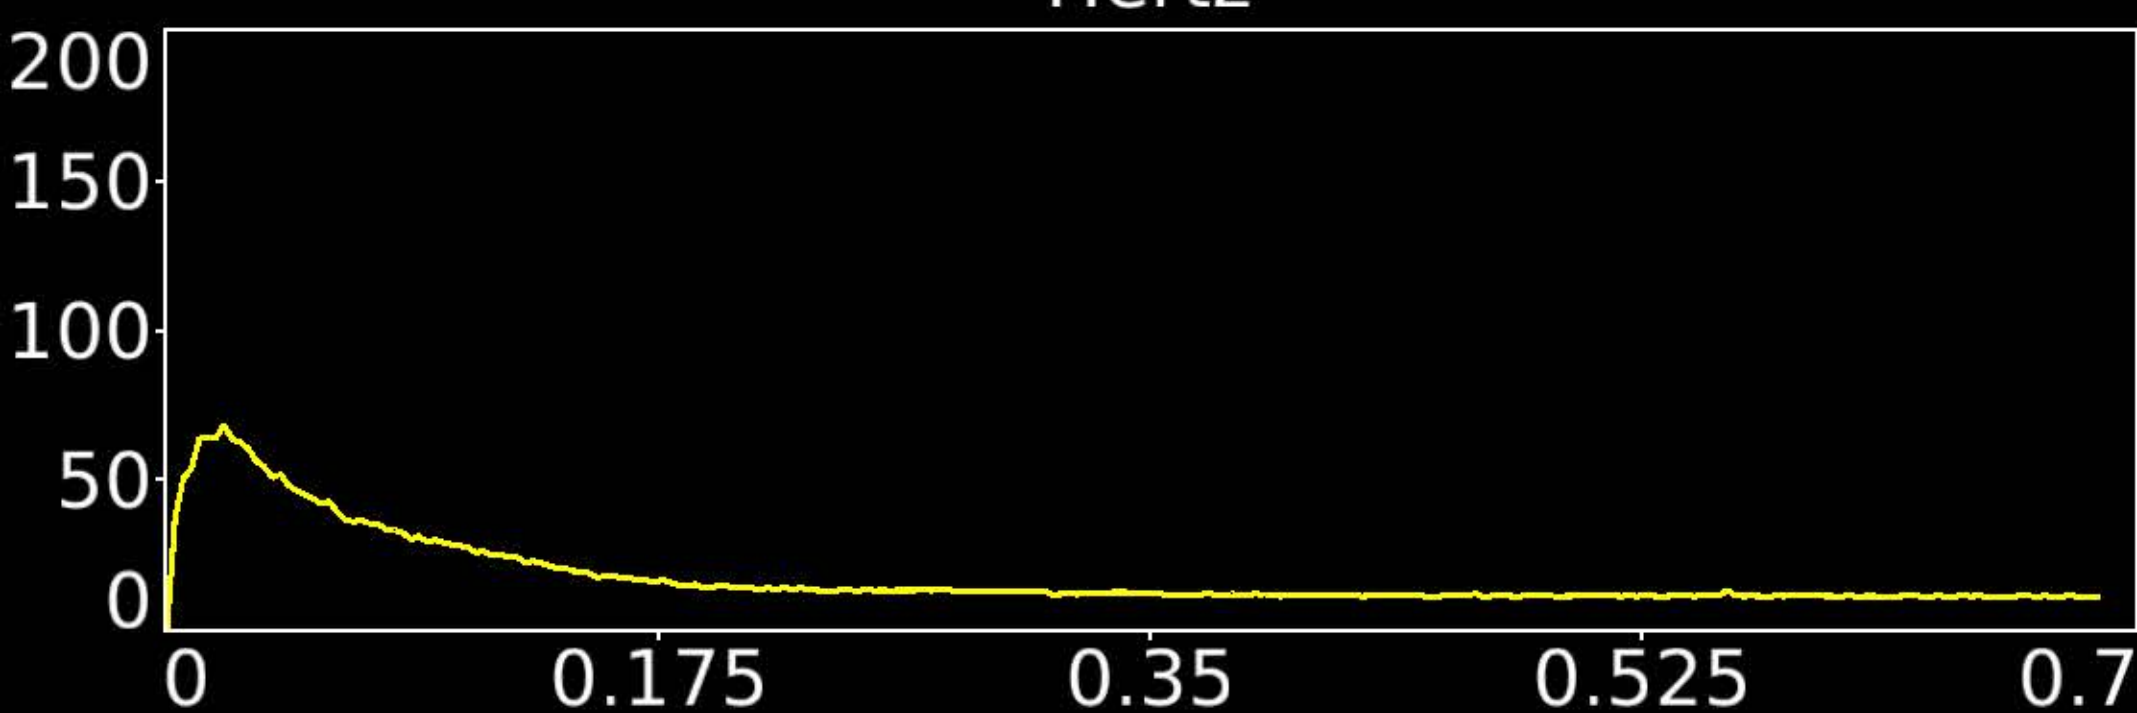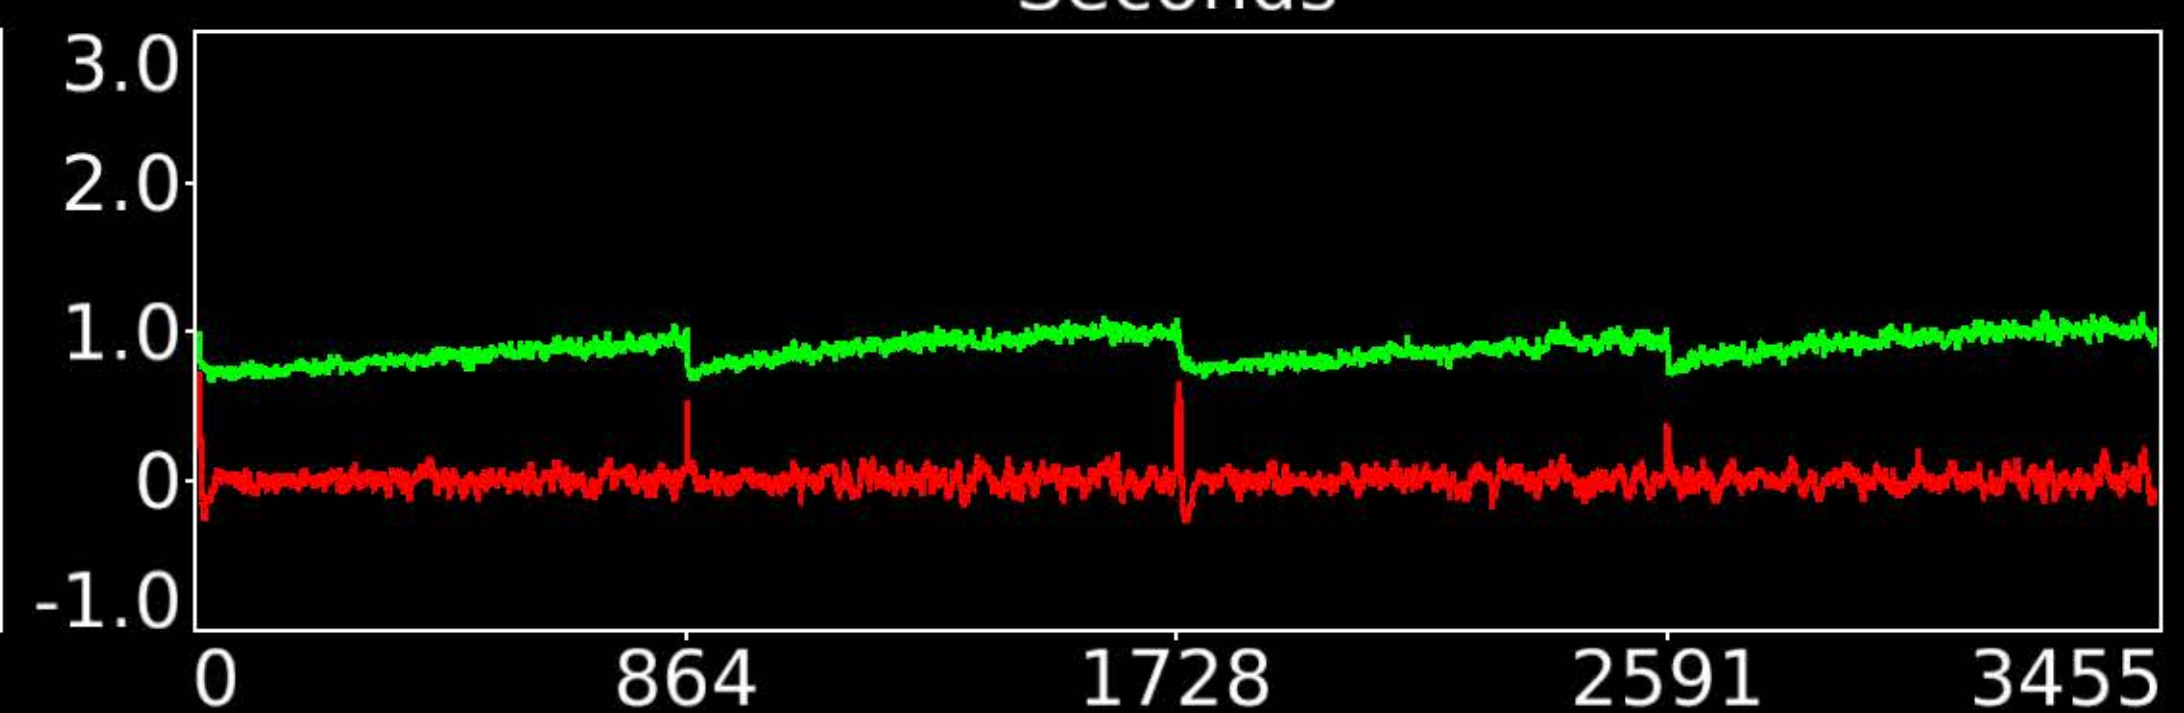

|                           |                            |                                           |  |
|---------------------------|----------------------------|-------------------------------------------|--|
| Number & Class: 22 Signal |                            | Name: Foveal > Peripheral Unknown Network |  |
| RVT Correlated: No        | DVARS Dip Associated: No   | Cross-Subject Variable: Yes               |  |
| Single Subject: No        | % Variance Explained: 1.35 | Globality Index: 0.92                     |  |
| Task Component: No        | Taskr Component: No        | Sleep Noted: Yes                          |  |

Rationale: Spatial map includes positive and negative patches that respect known retinotopic visual organization (Foveal vs Peripheral)



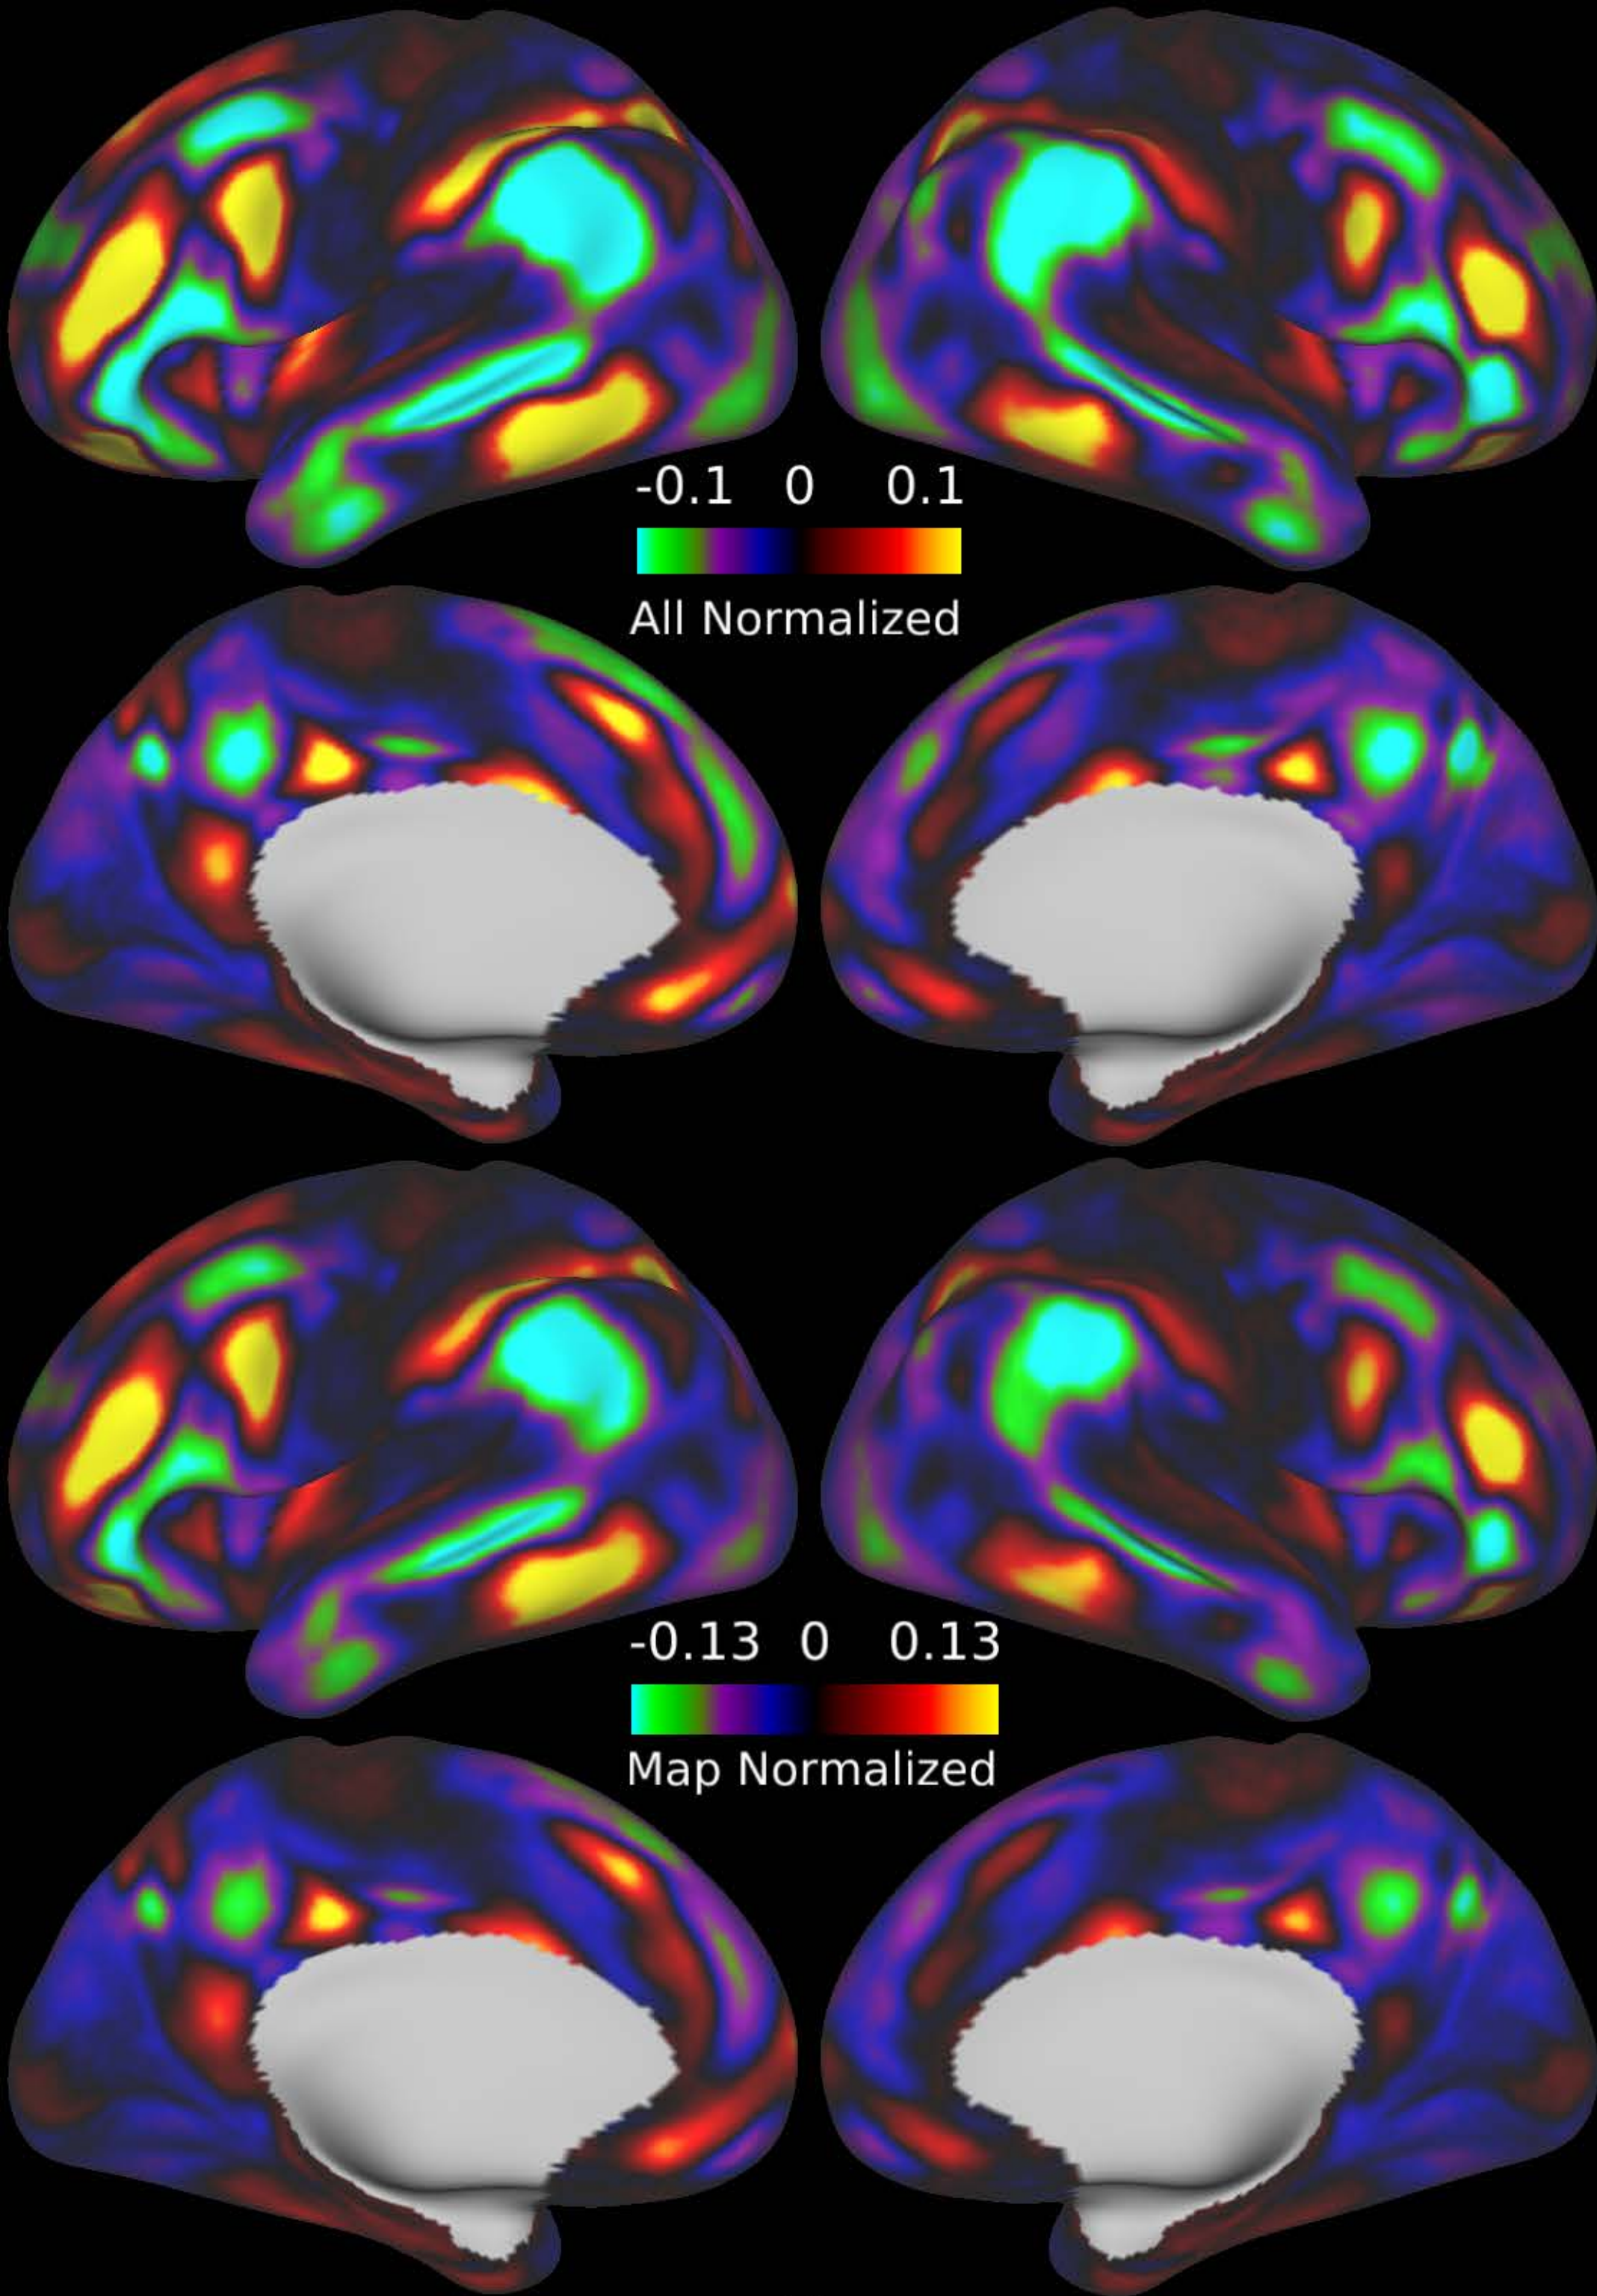

Hertz

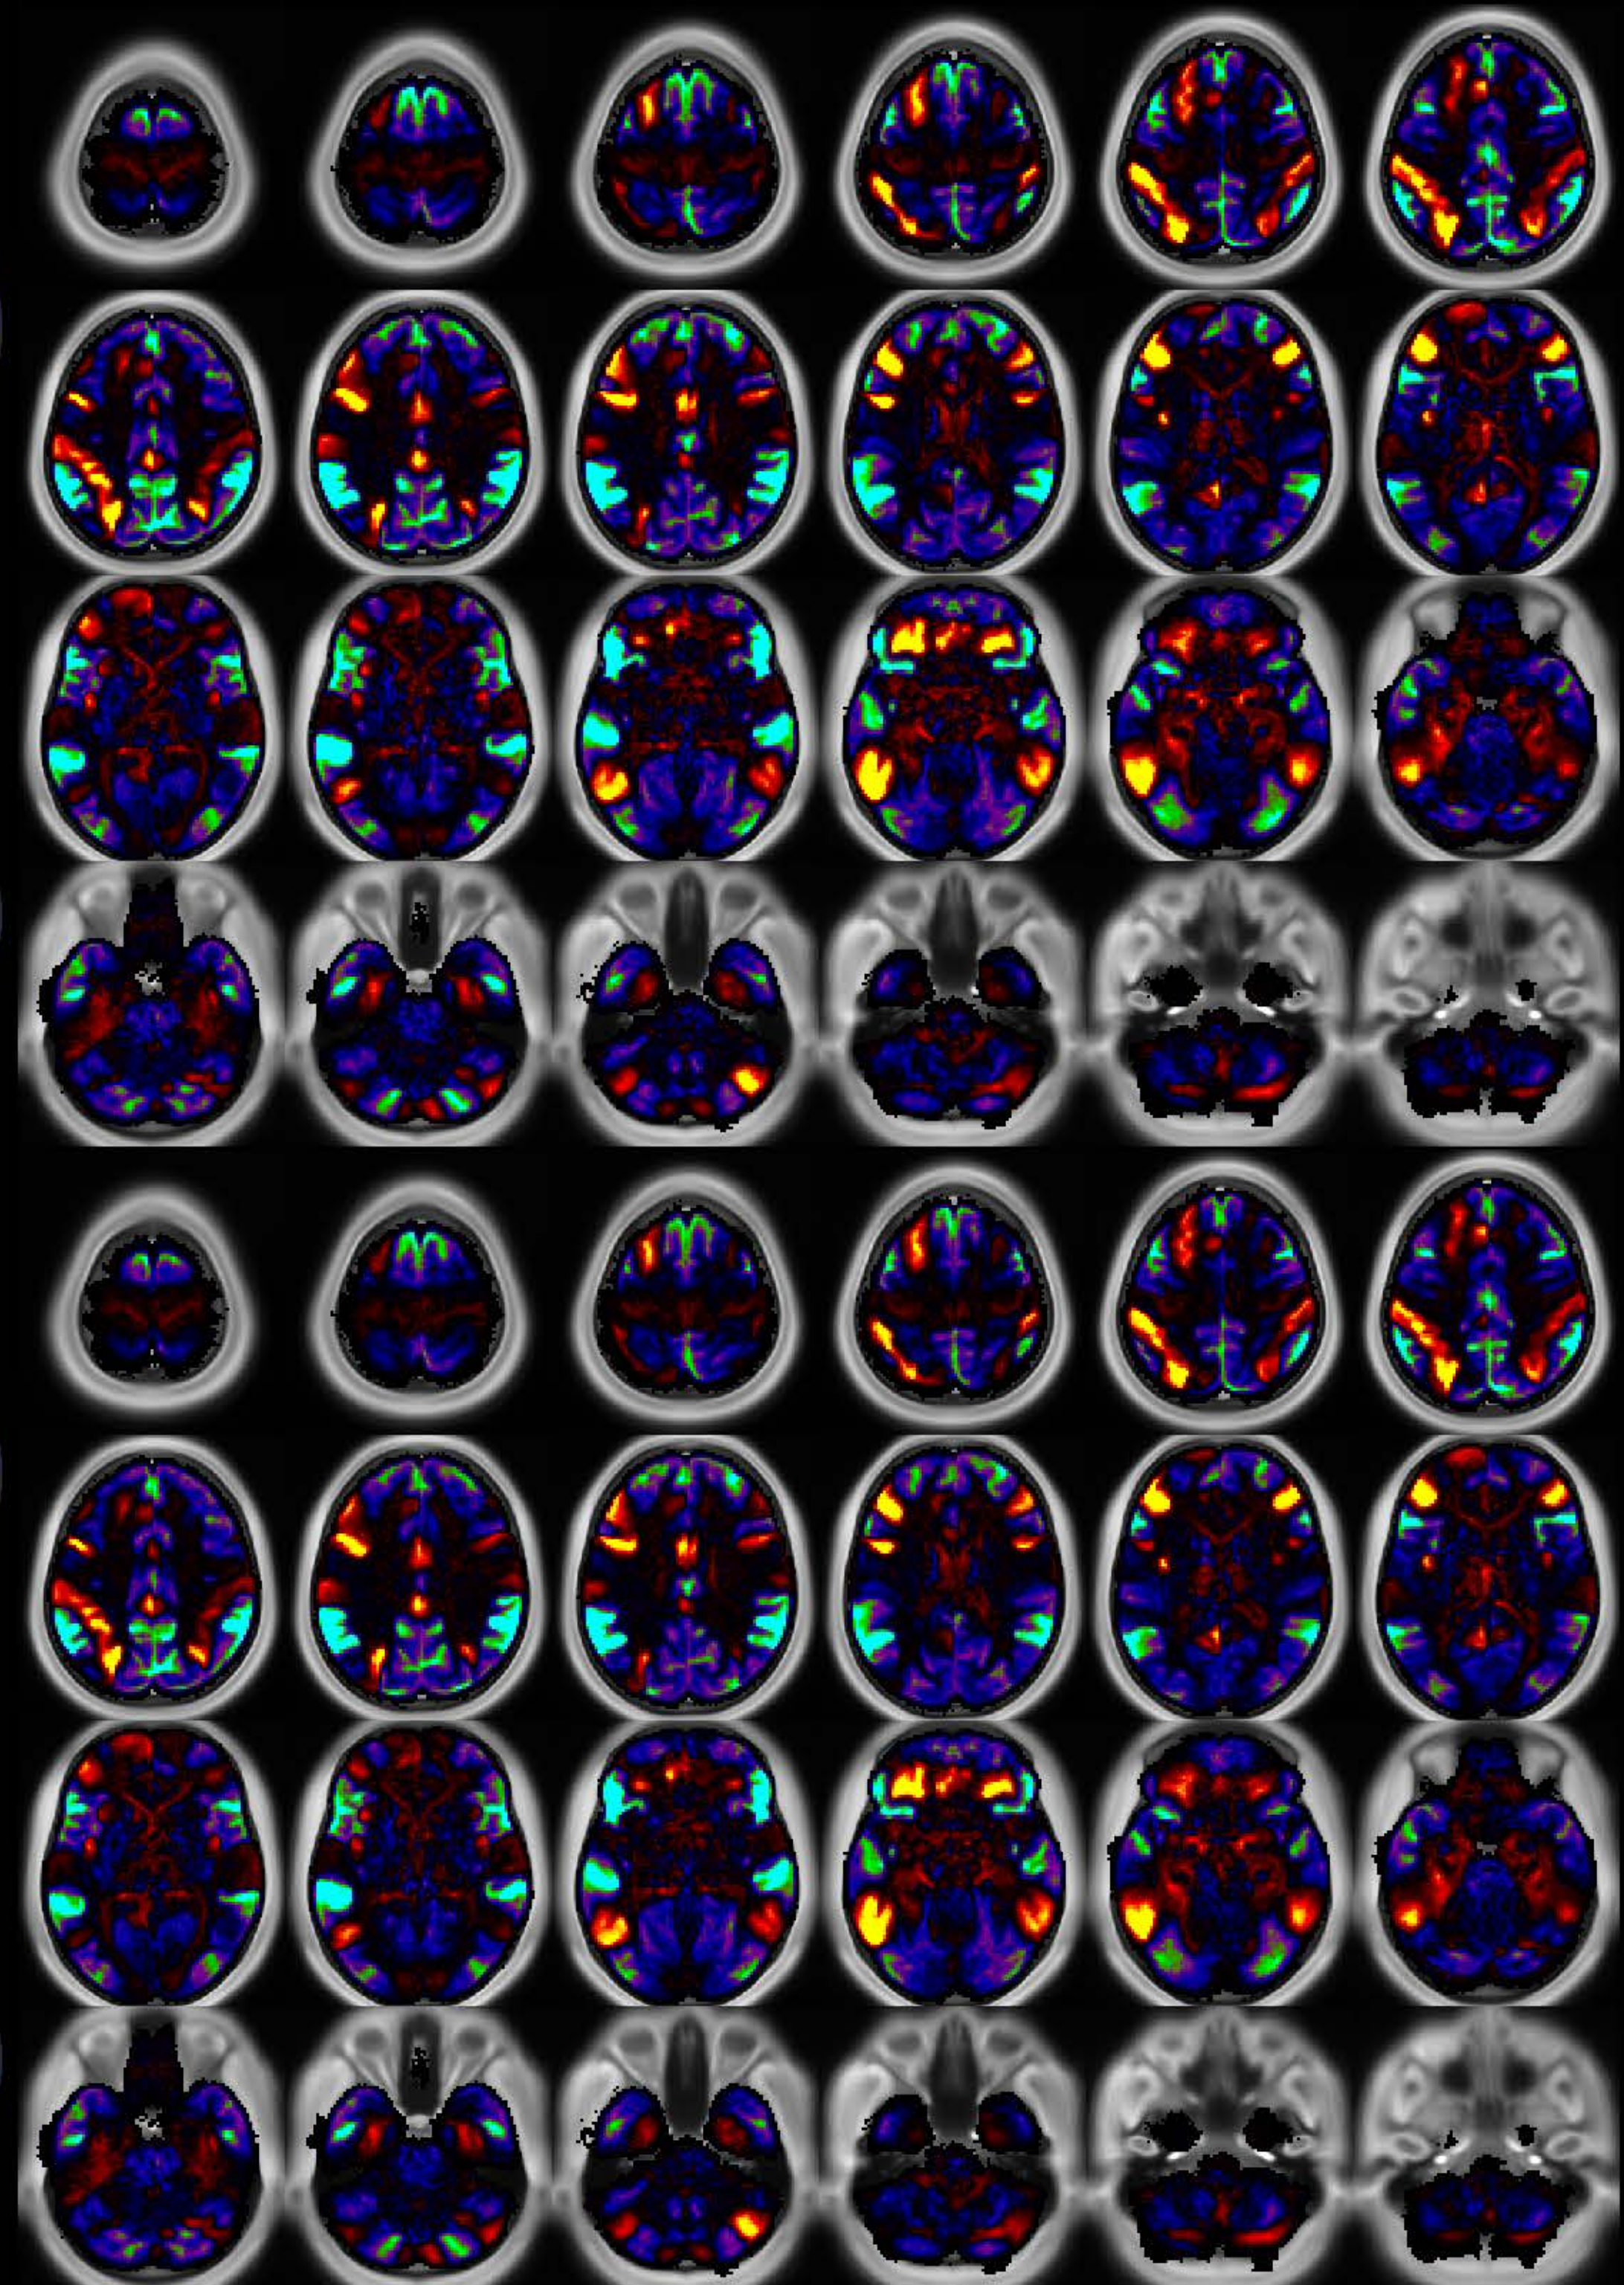

Seconds

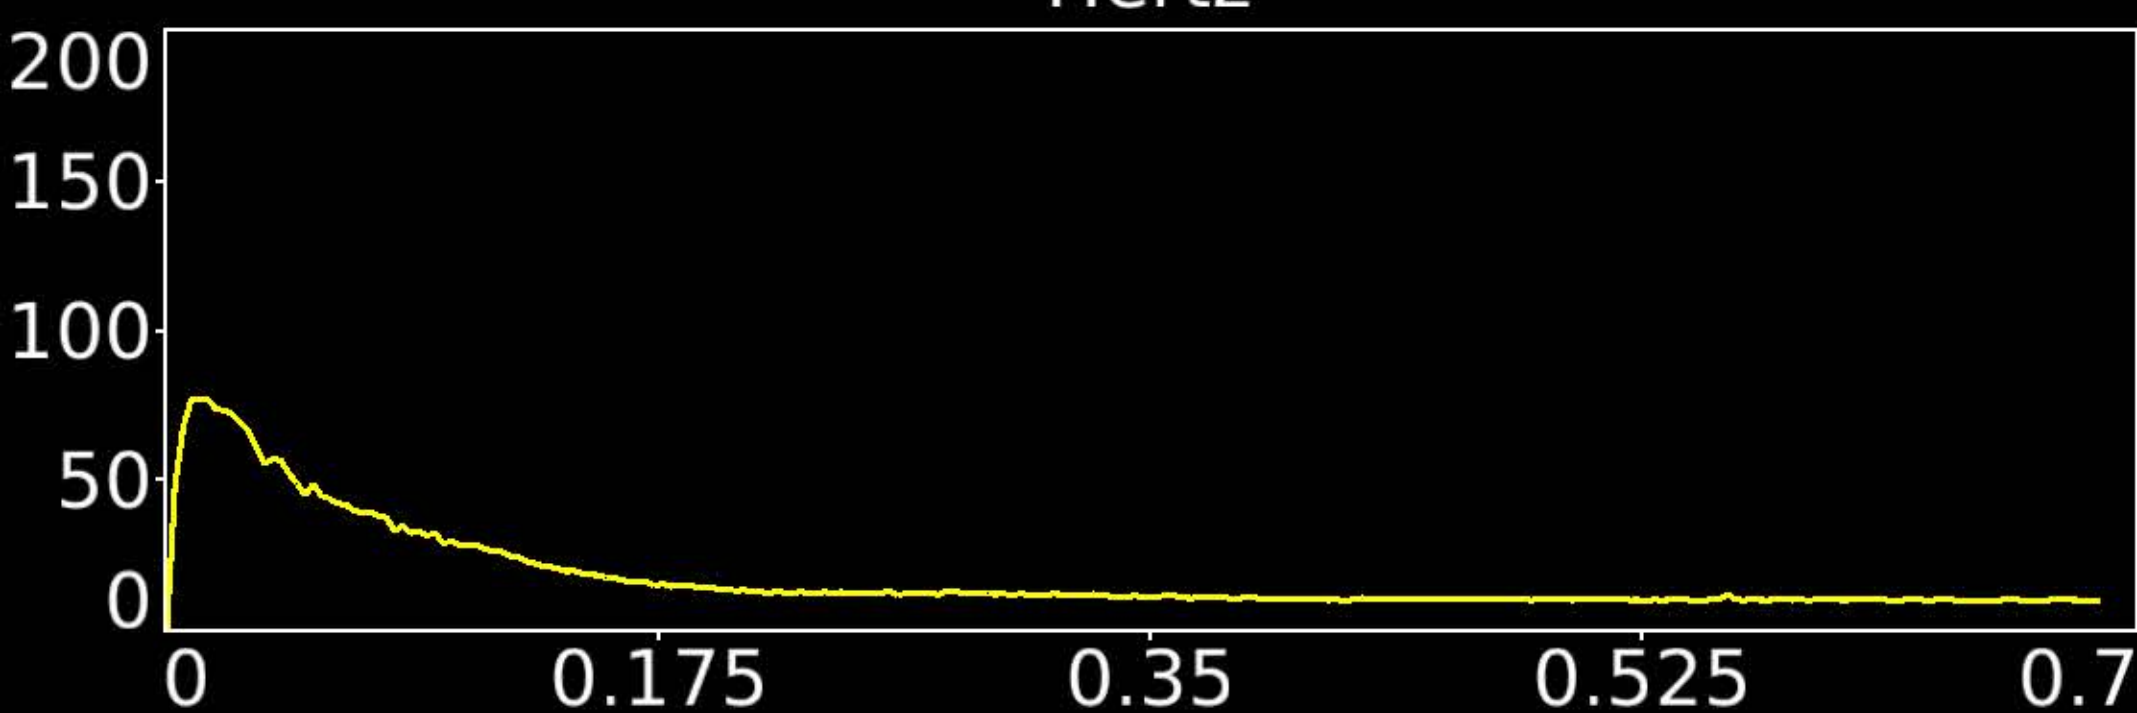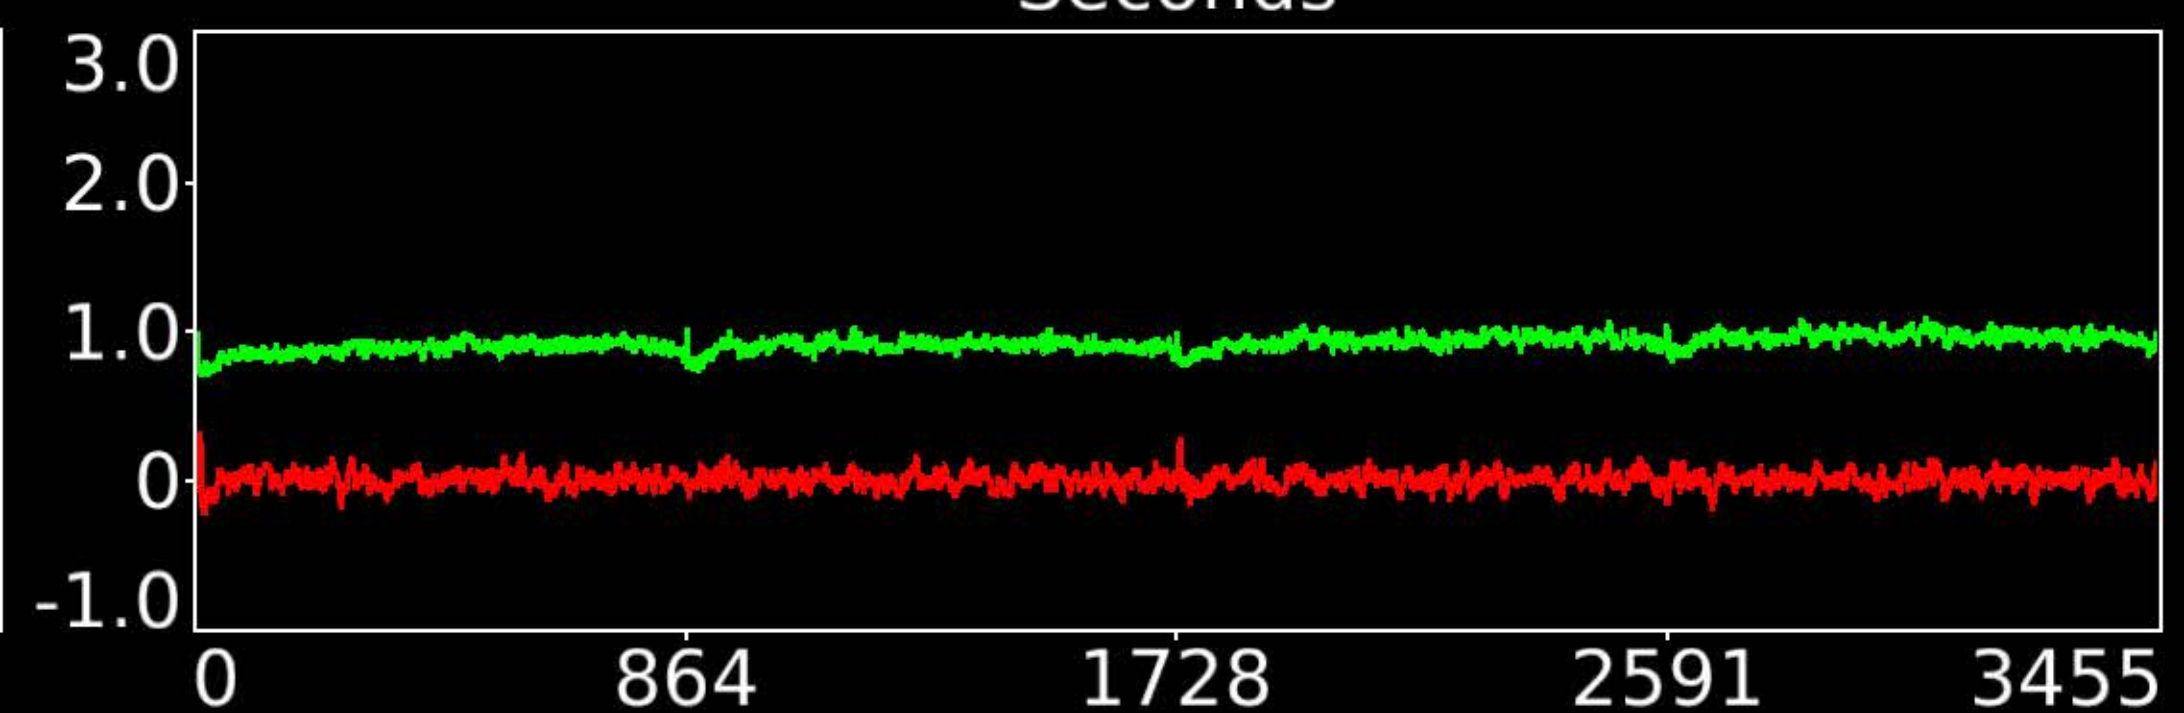

|                                                                                                                      |                            |                                          |  |
|----------------------------------------------------------------------------------------------------------------------|----------------------------|------------------------------------------|--|
| Number & Class: 23 Signal                                                                                            |                            | Name: Subsidiary Fronto-Parietal Network |  |
| RVT Correlated: No                                                                                                   | DVARS Dip Associated: No   | Cross-Subject Variable: No               |  |
| Single Subject: No                                                                                                   | % Variance Explained: 1.35 | Globality Index: 0.91                    |  |
| Task Component: No                                                                                                   | Taskr Component: No        | Sleep Noted: No                          |  |
| Rationale: Spatial map includes positive and negative patches that respect known RSNs (e.g. Fronto-Parietal Network) |                            |                                          |  |



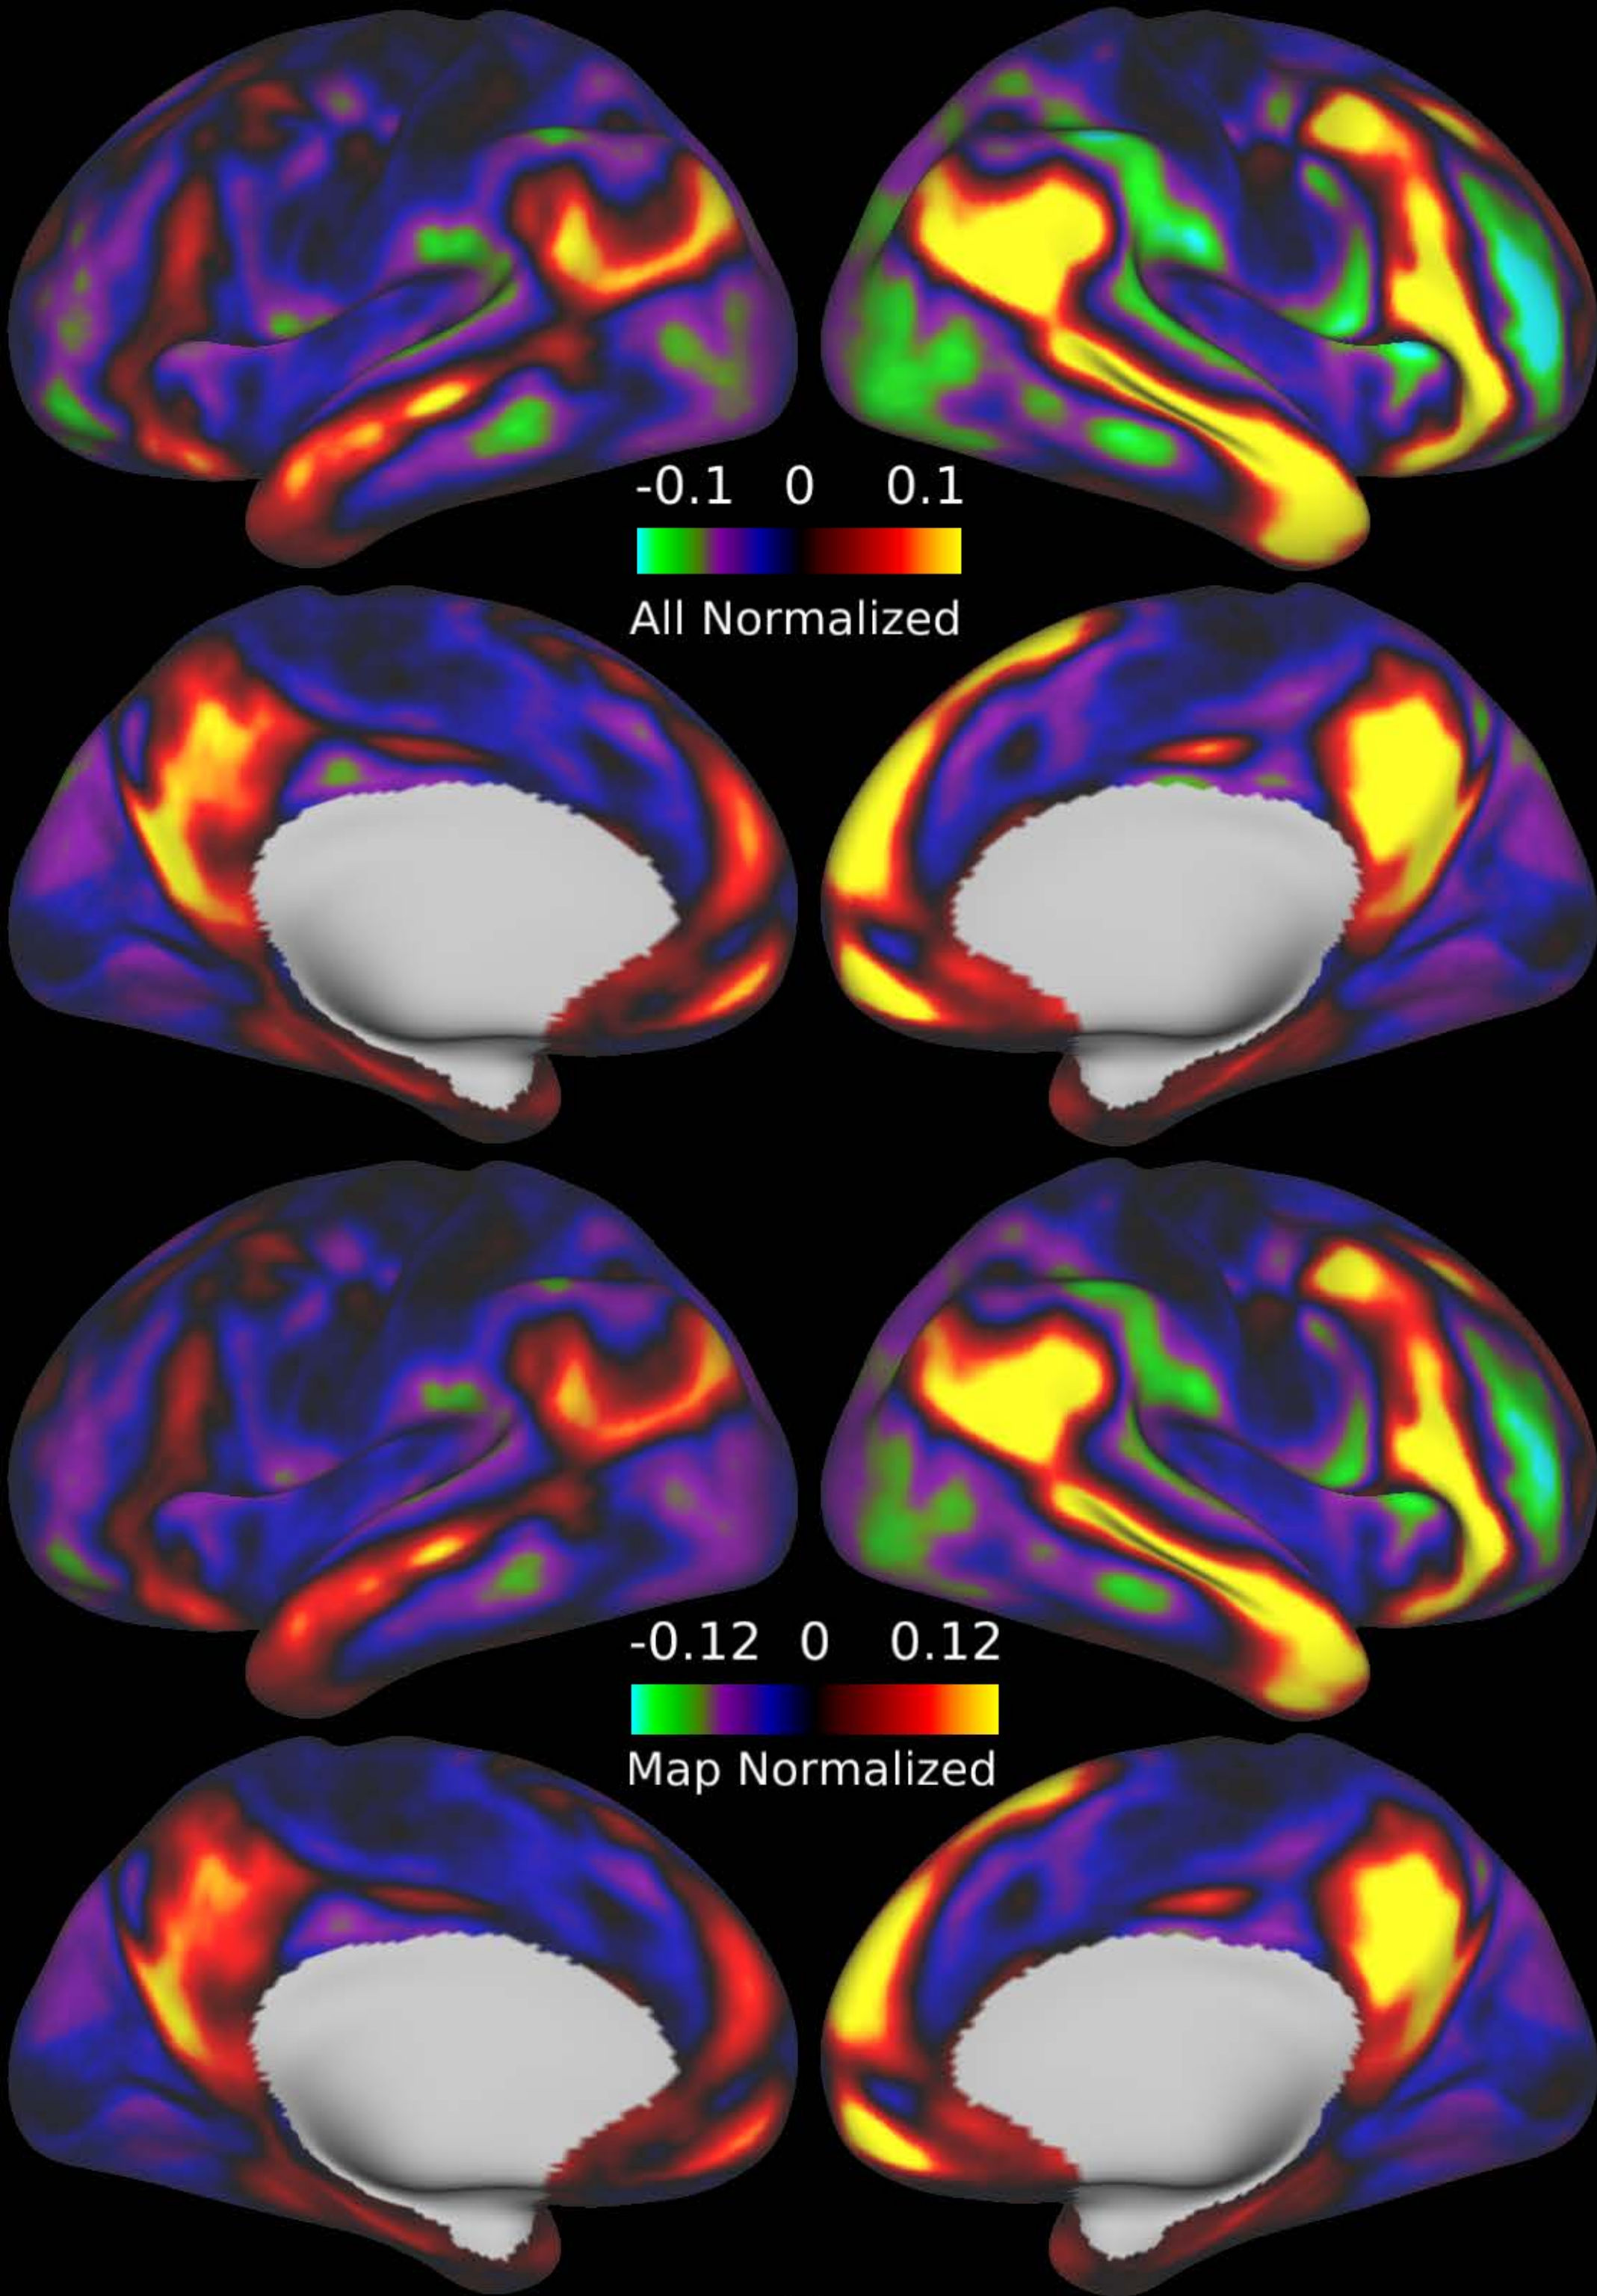

Hertz

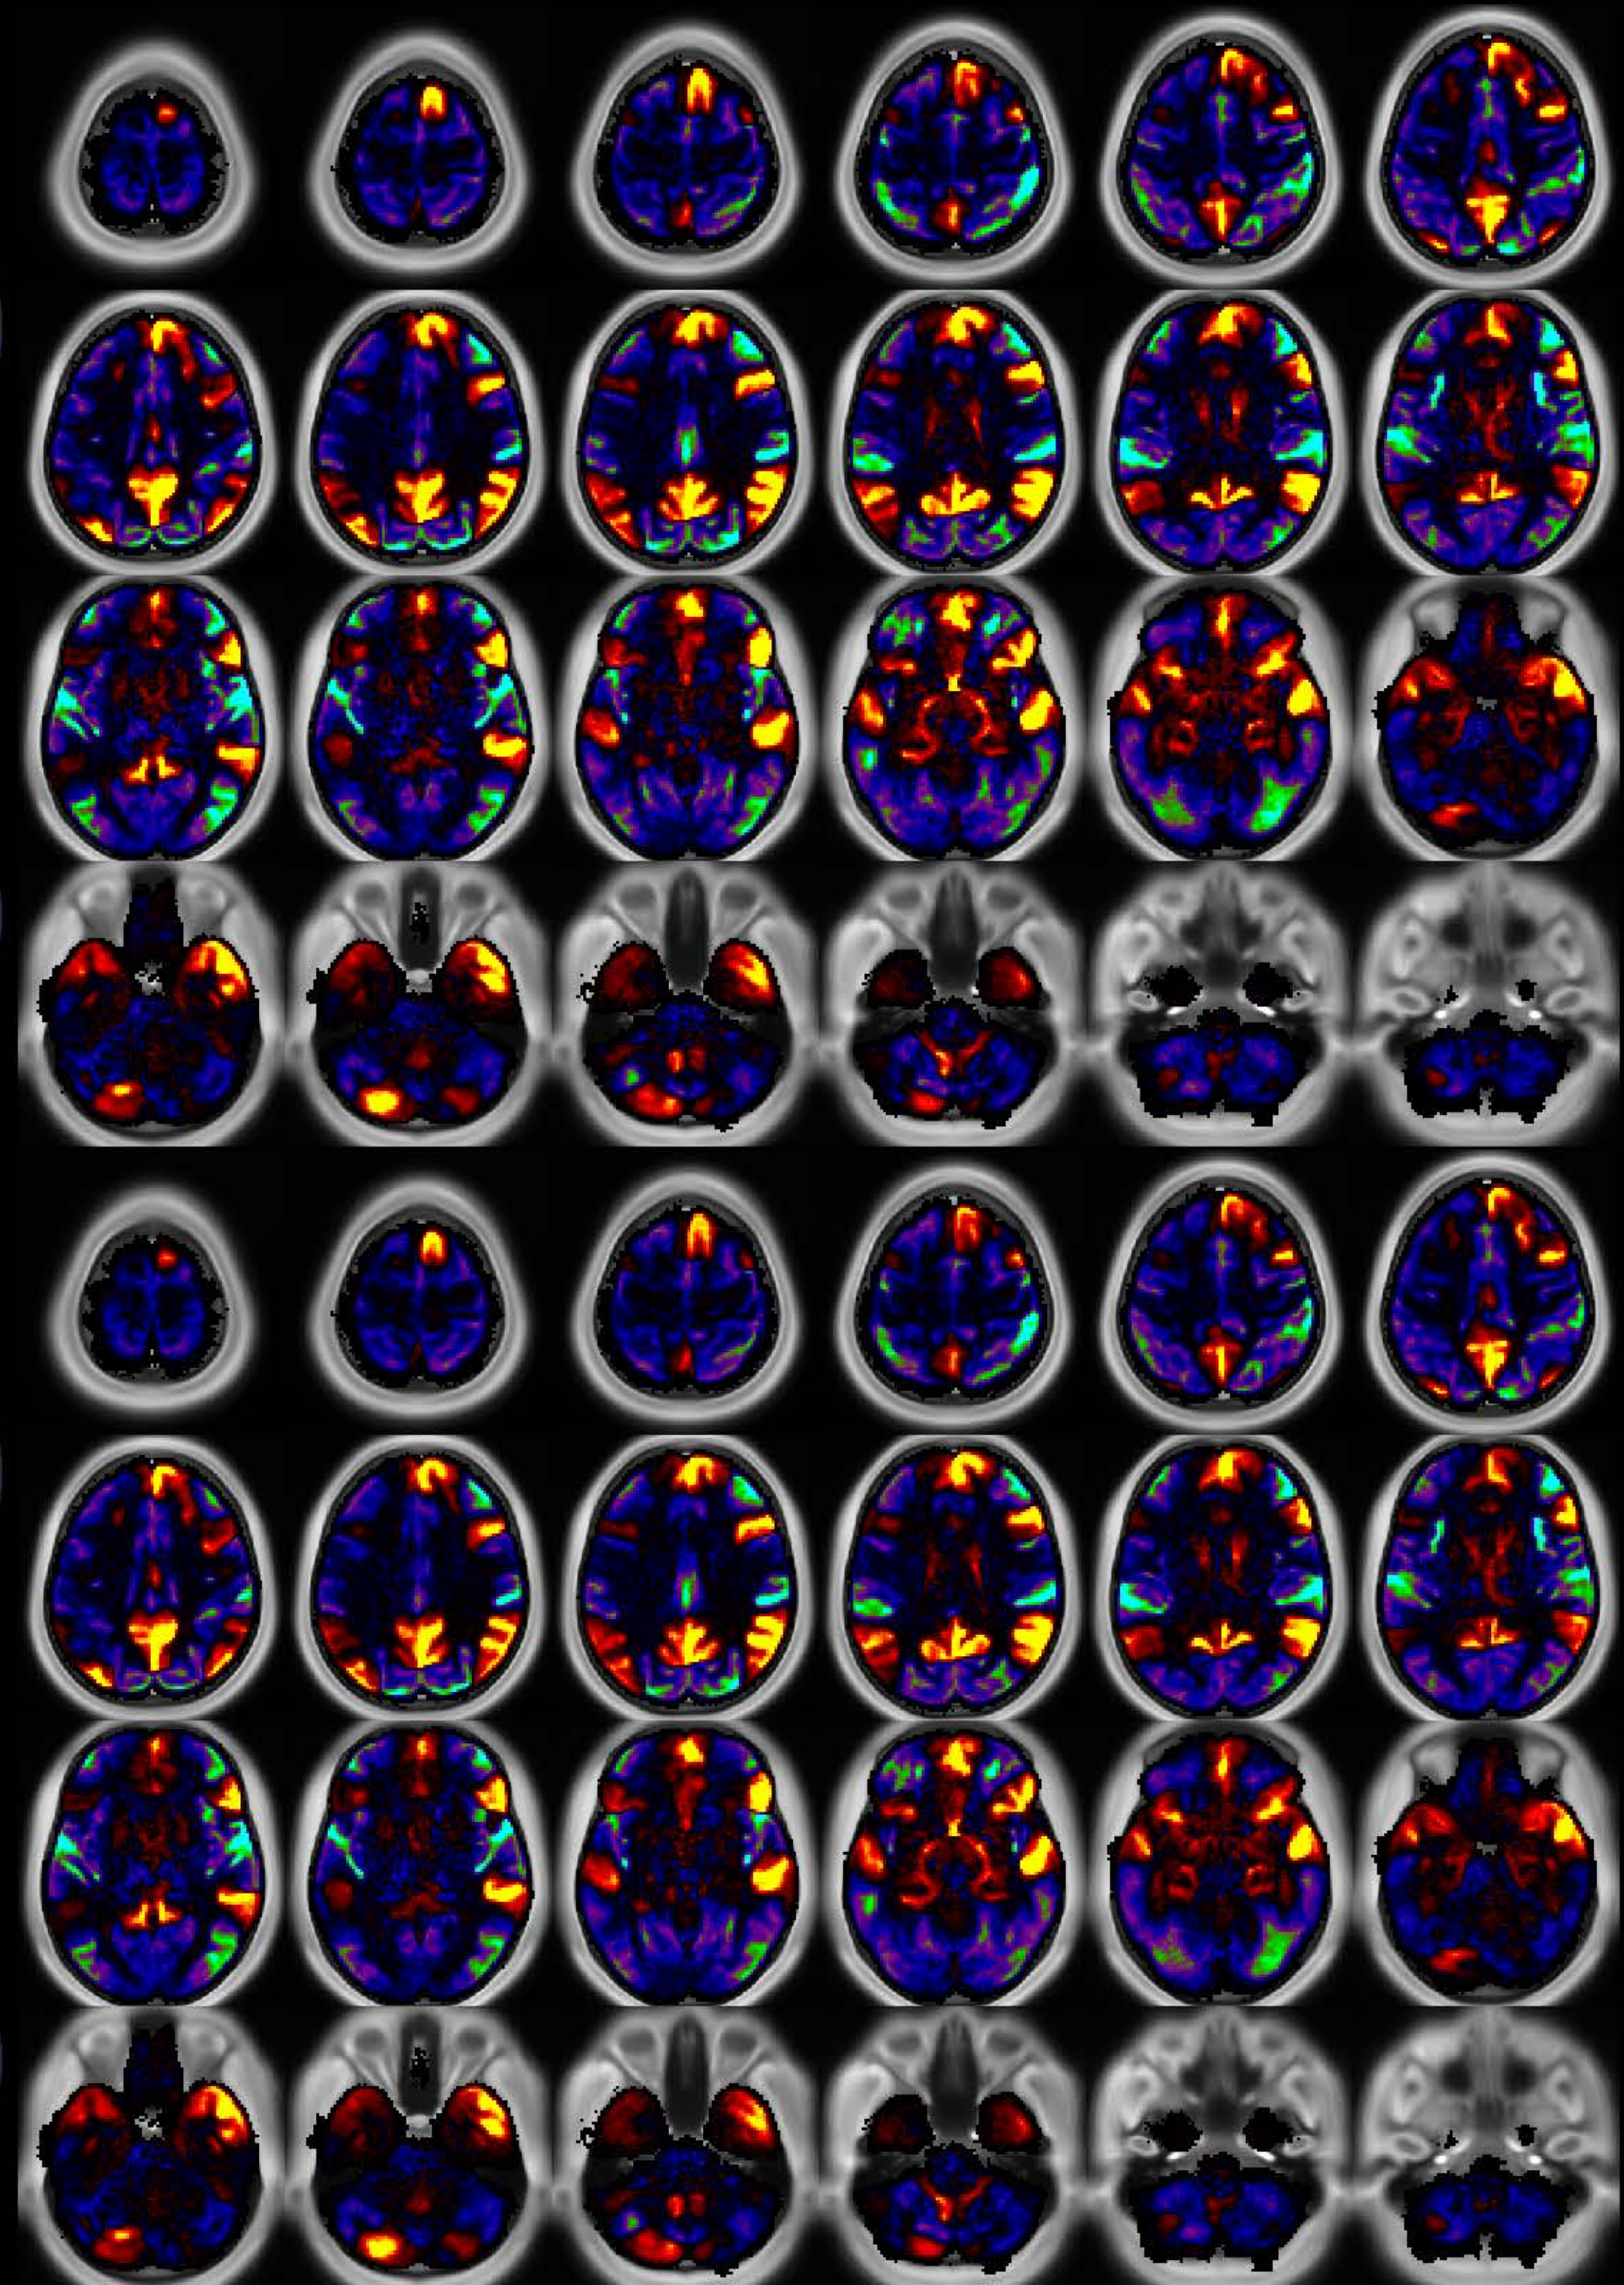

Seconds

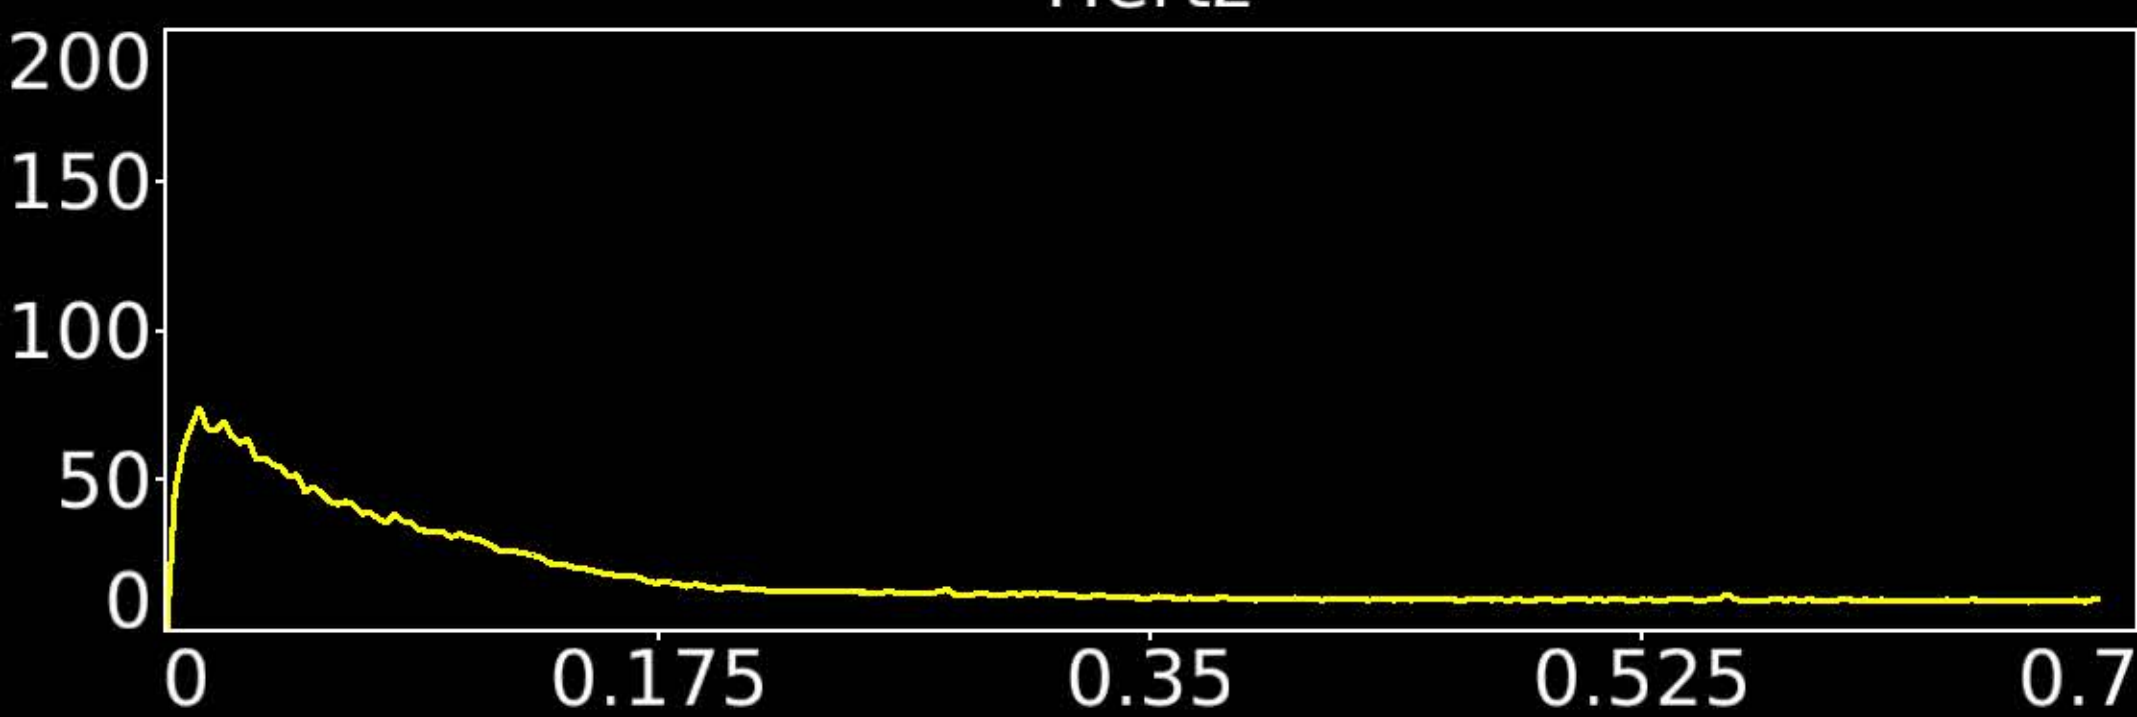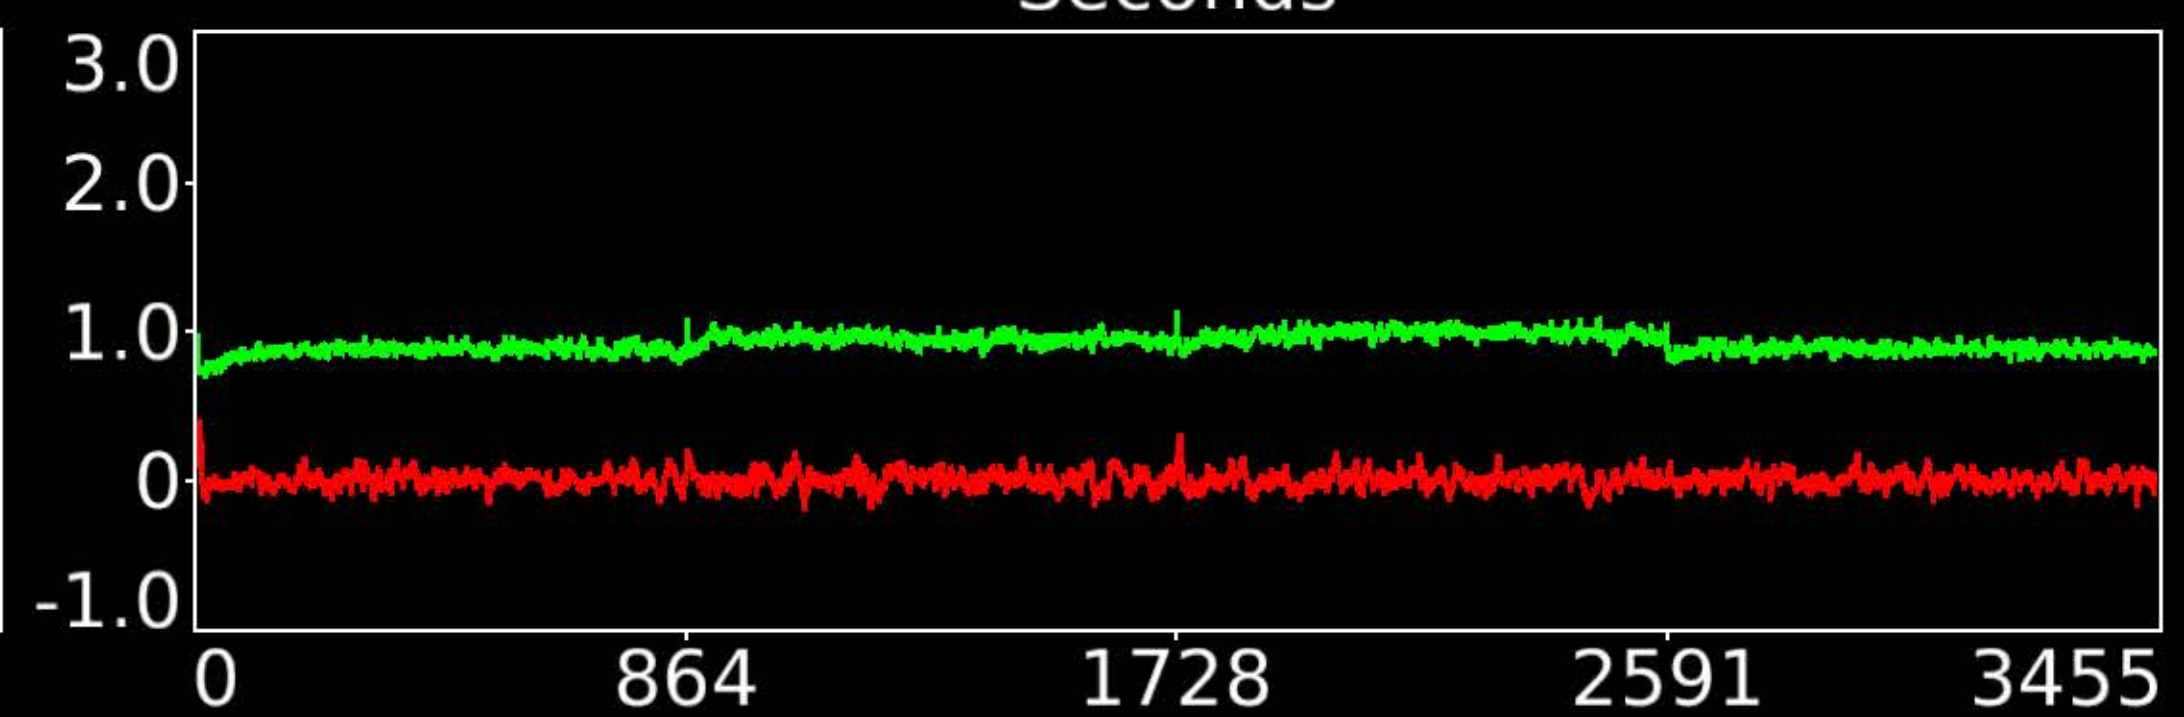

|                           |                            |                               |  |
|---------------------------|----------------------------|-------------------------------|--|
| Number & Class: 24 Signal |                            | Name: Subsidiary Default Mode |  |
| RVT Correlated: No        | DVARS Dip Associated: No   | Cross-Subject Variable: No    |  |
| Single Subject: No        | % Variance Explained: 1.32 | Globality Index: 0.94         |  |
| Task Component: No        | Taskr Component: 48        | Sleep Noted: No               |  |

Rationale: Spatial map includes positive and negative patches that respect known RSNs (e.g. Default Mode Network)



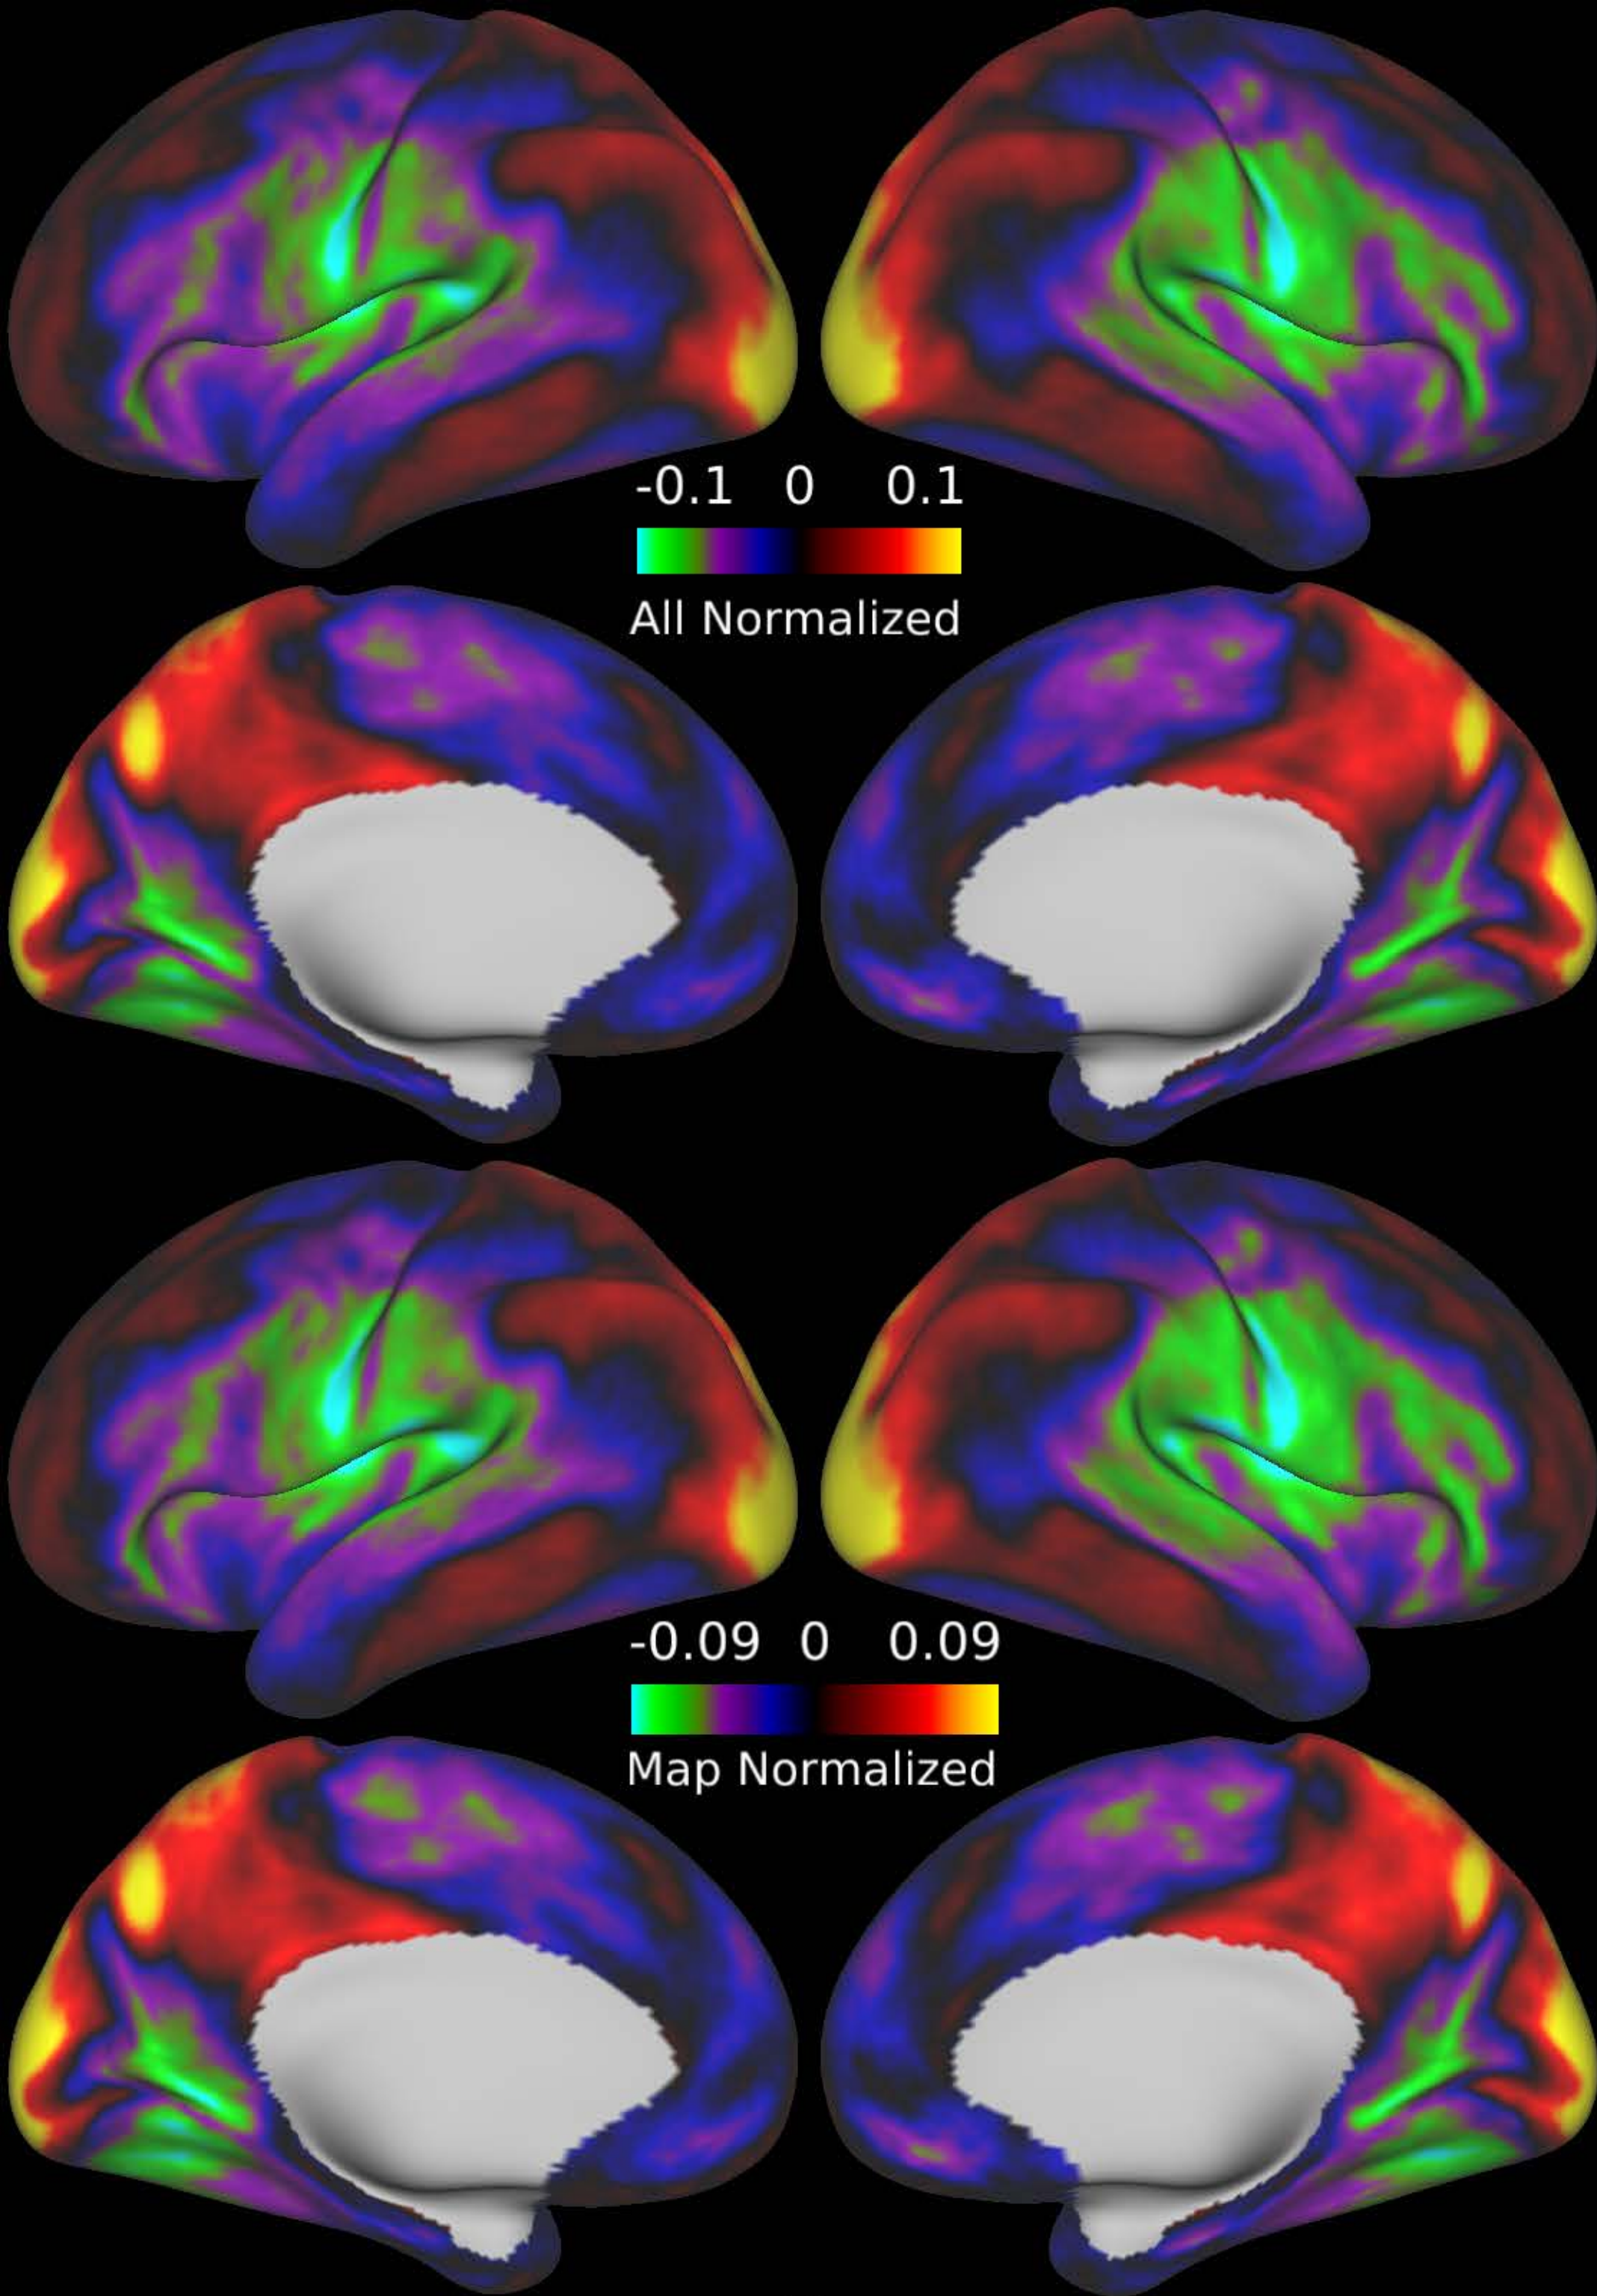

Hertz

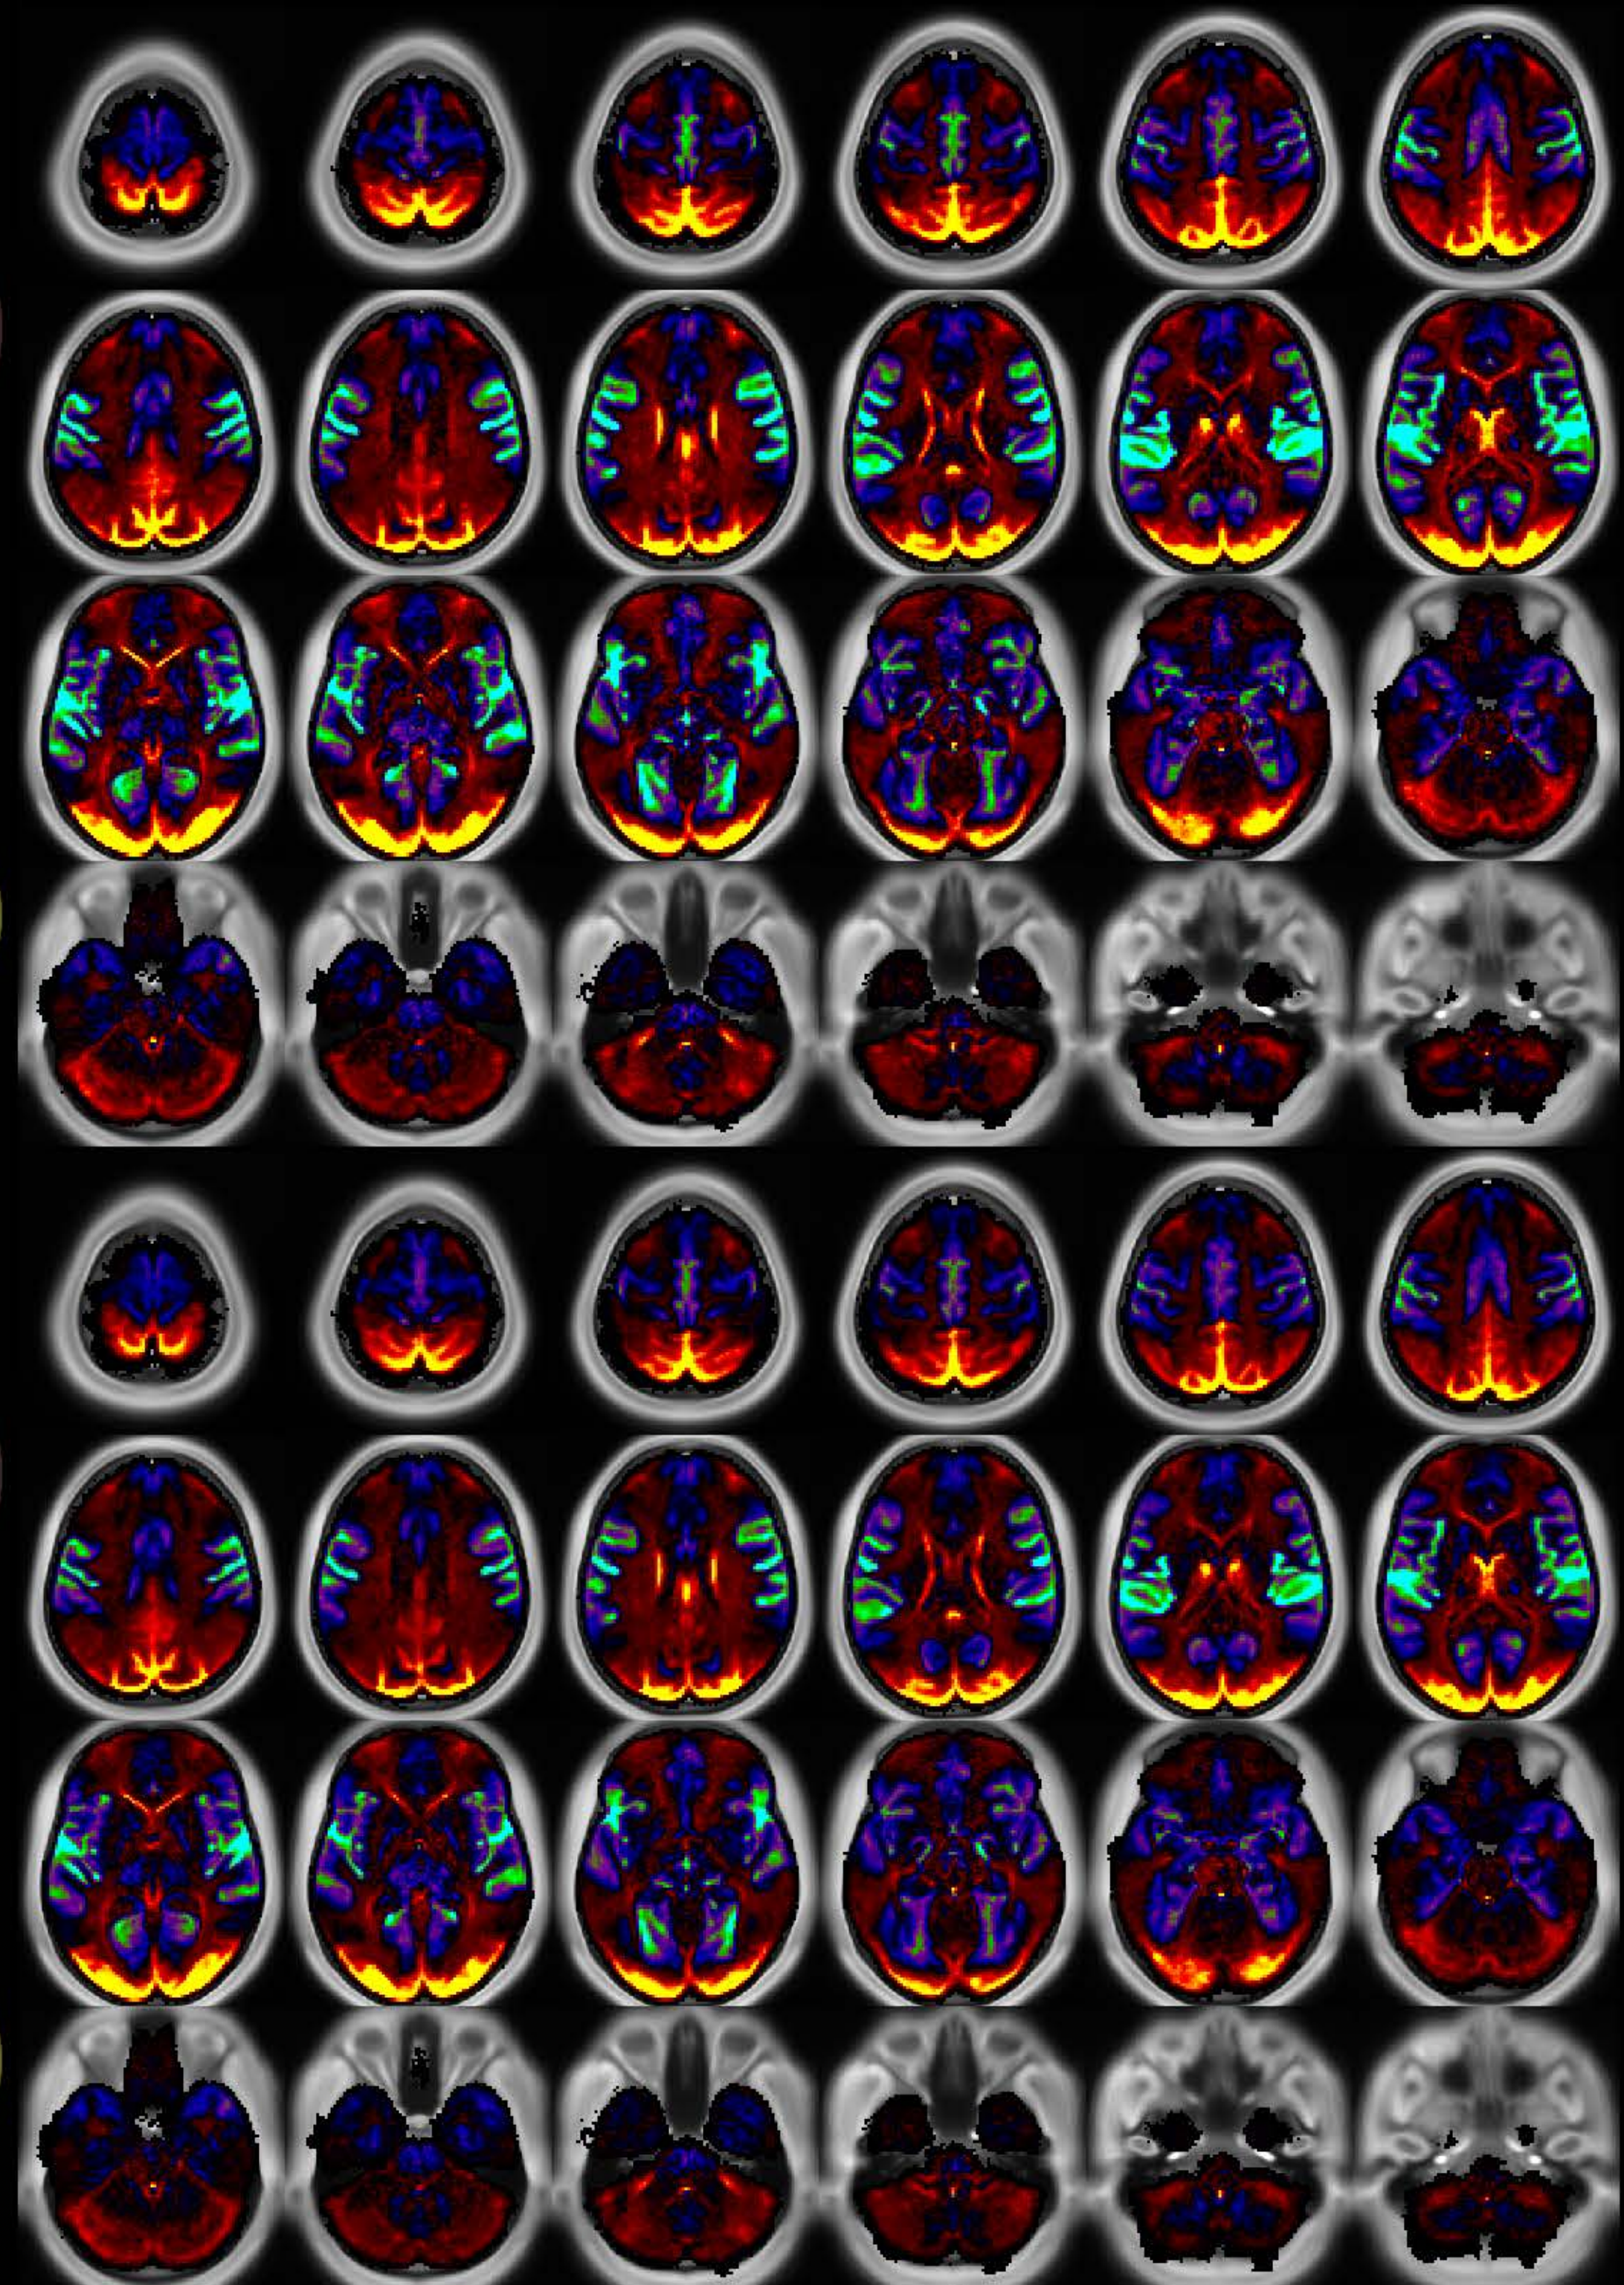

Seconds

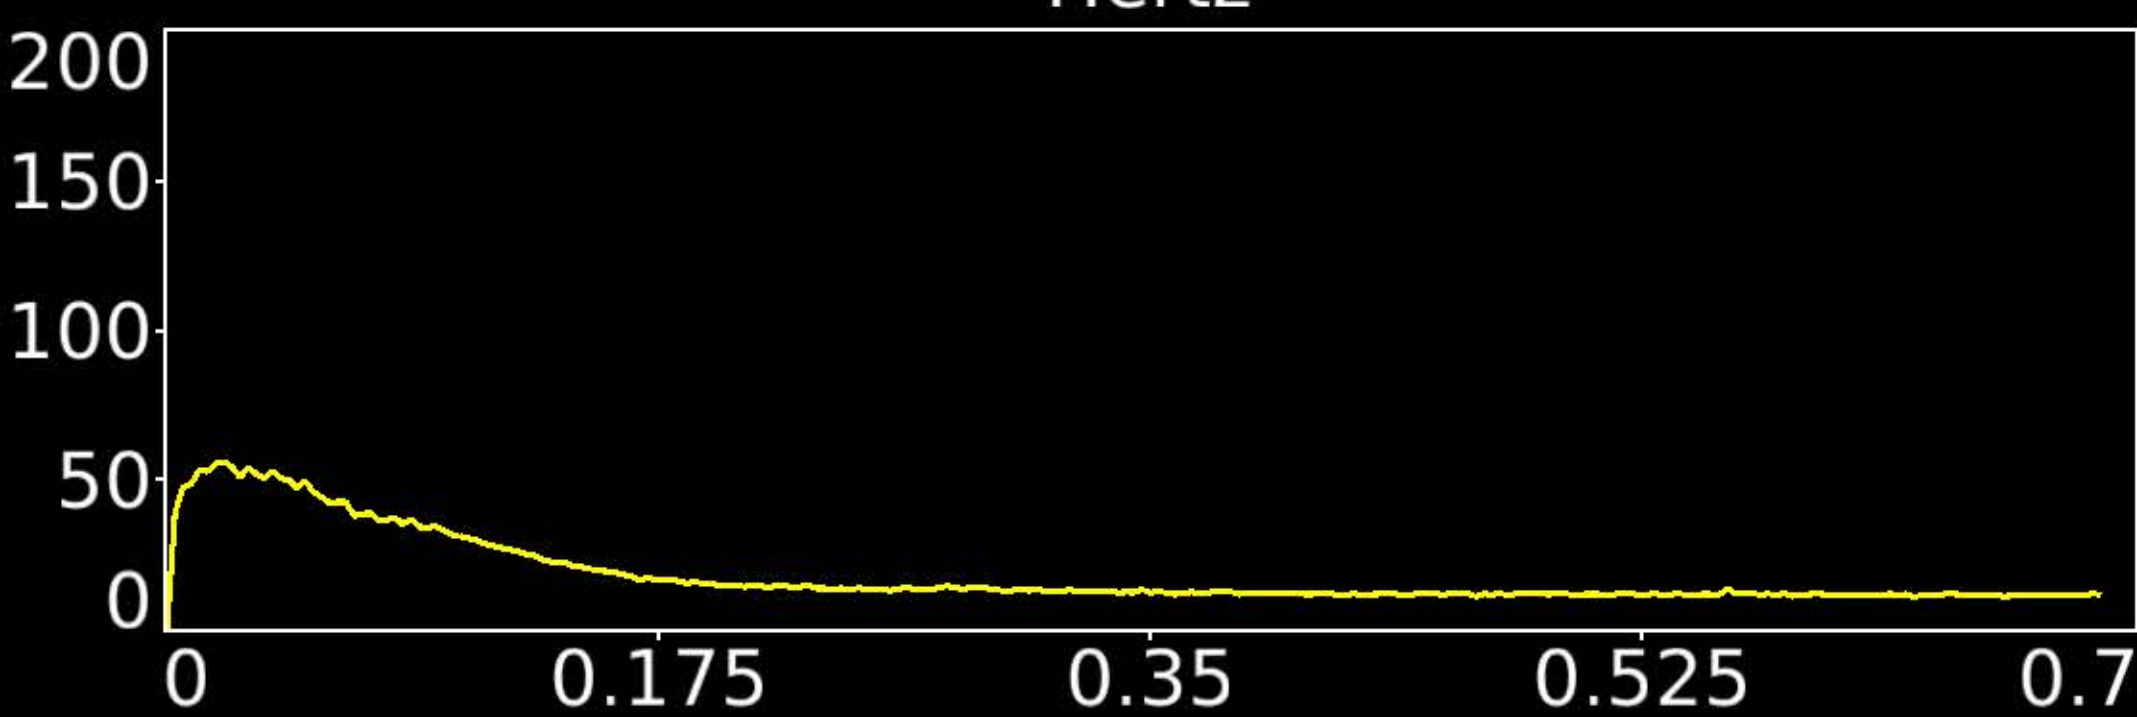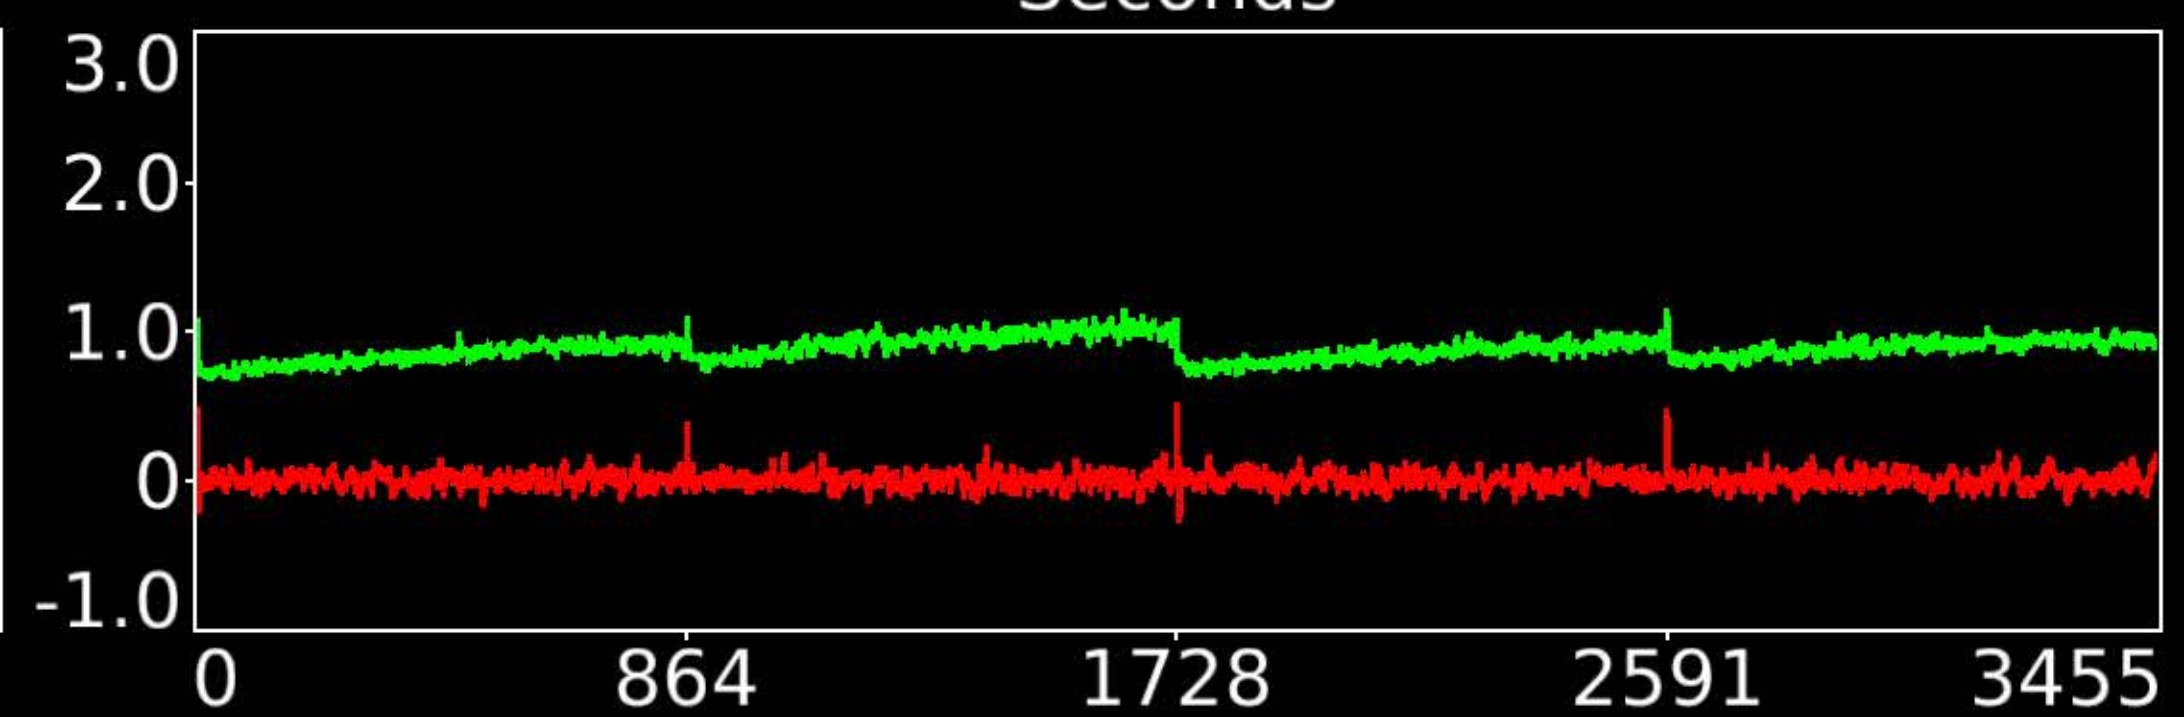

|                                                                                                         |                            |                              |  |
|---------------------------------------------------------------------------------------------------------|----------------------------|------------------------------|--|
| Number & Class: 25 Noise                                                                                |                            | Name: WM + Odd Cortical Maps |  |
| RVT Correlated: No                                                                                      | DVARS Dip Associated: No   | Cross-Subject Variable: Yes  |  |
| Single Subject: No                                                                                      | % Variance Explained: 1.27 | Globality Index: 0.12        |  |
| Task Component: No                                                                                      | Taskr Component: 31        | Sleep Noted: No              |  |
| Rationale: Spatial map contains substantial white matter signal; may also reflect vascular distribution |                            |                              |  |



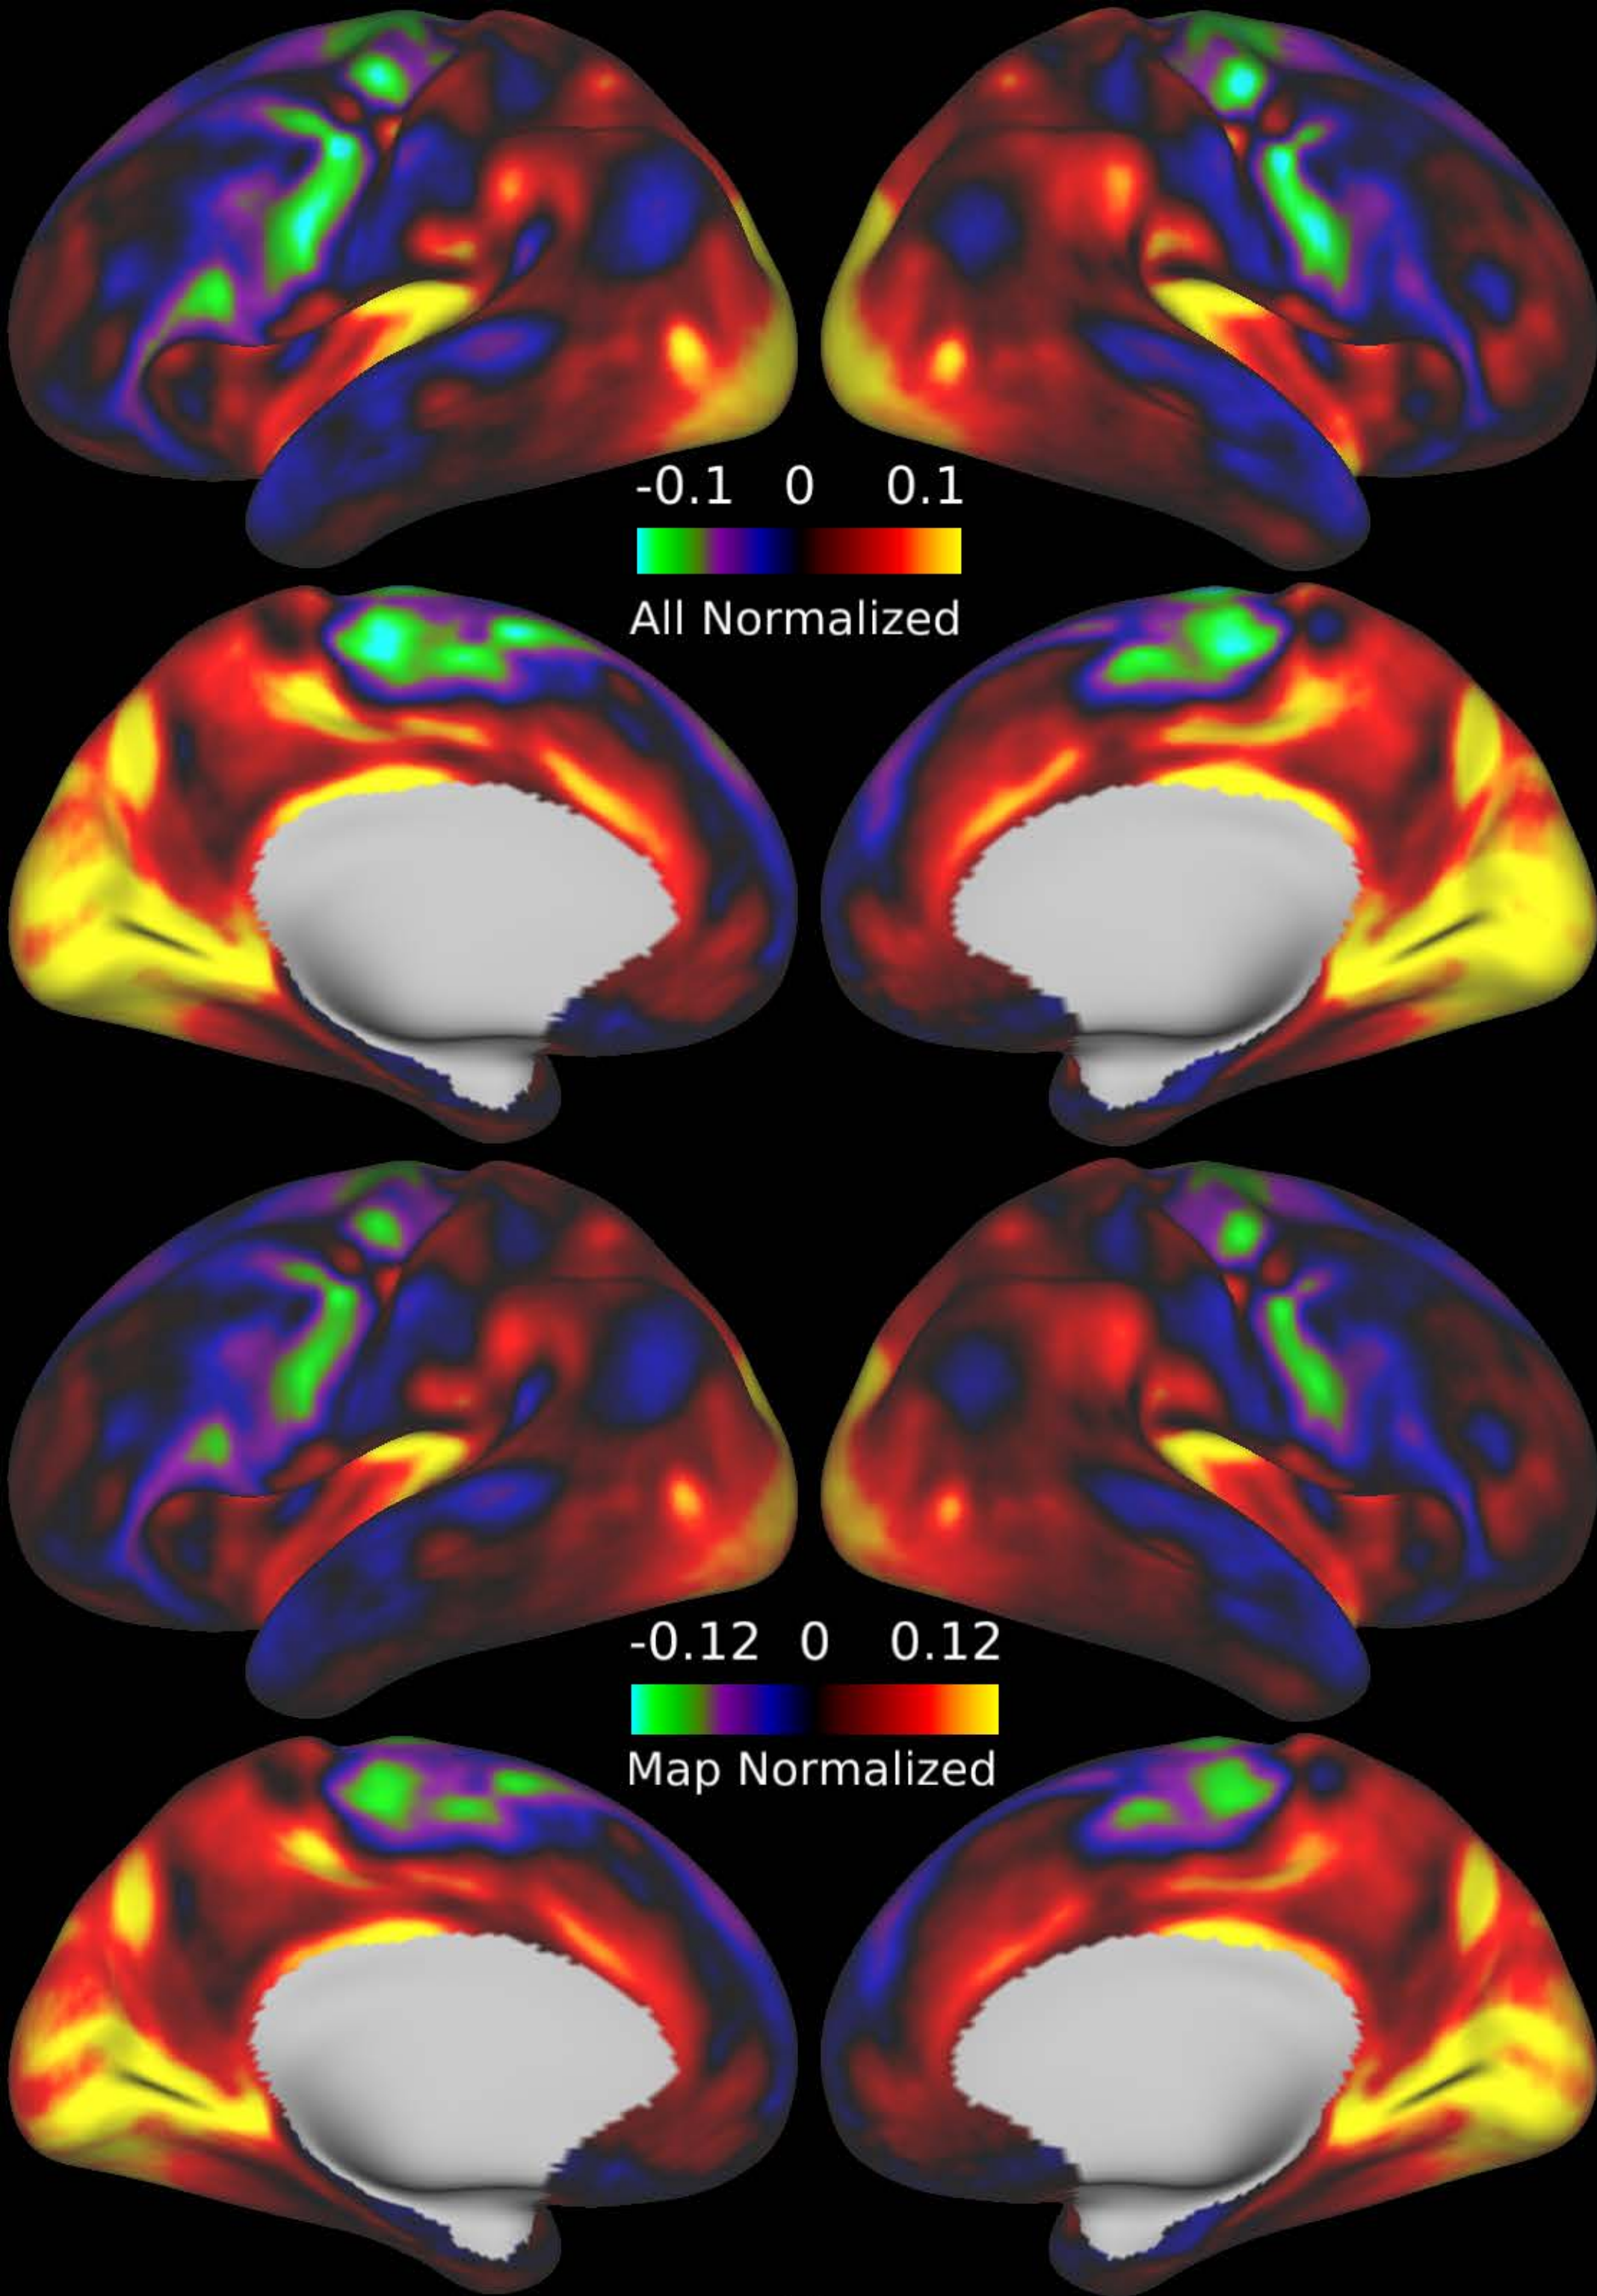

Hertz

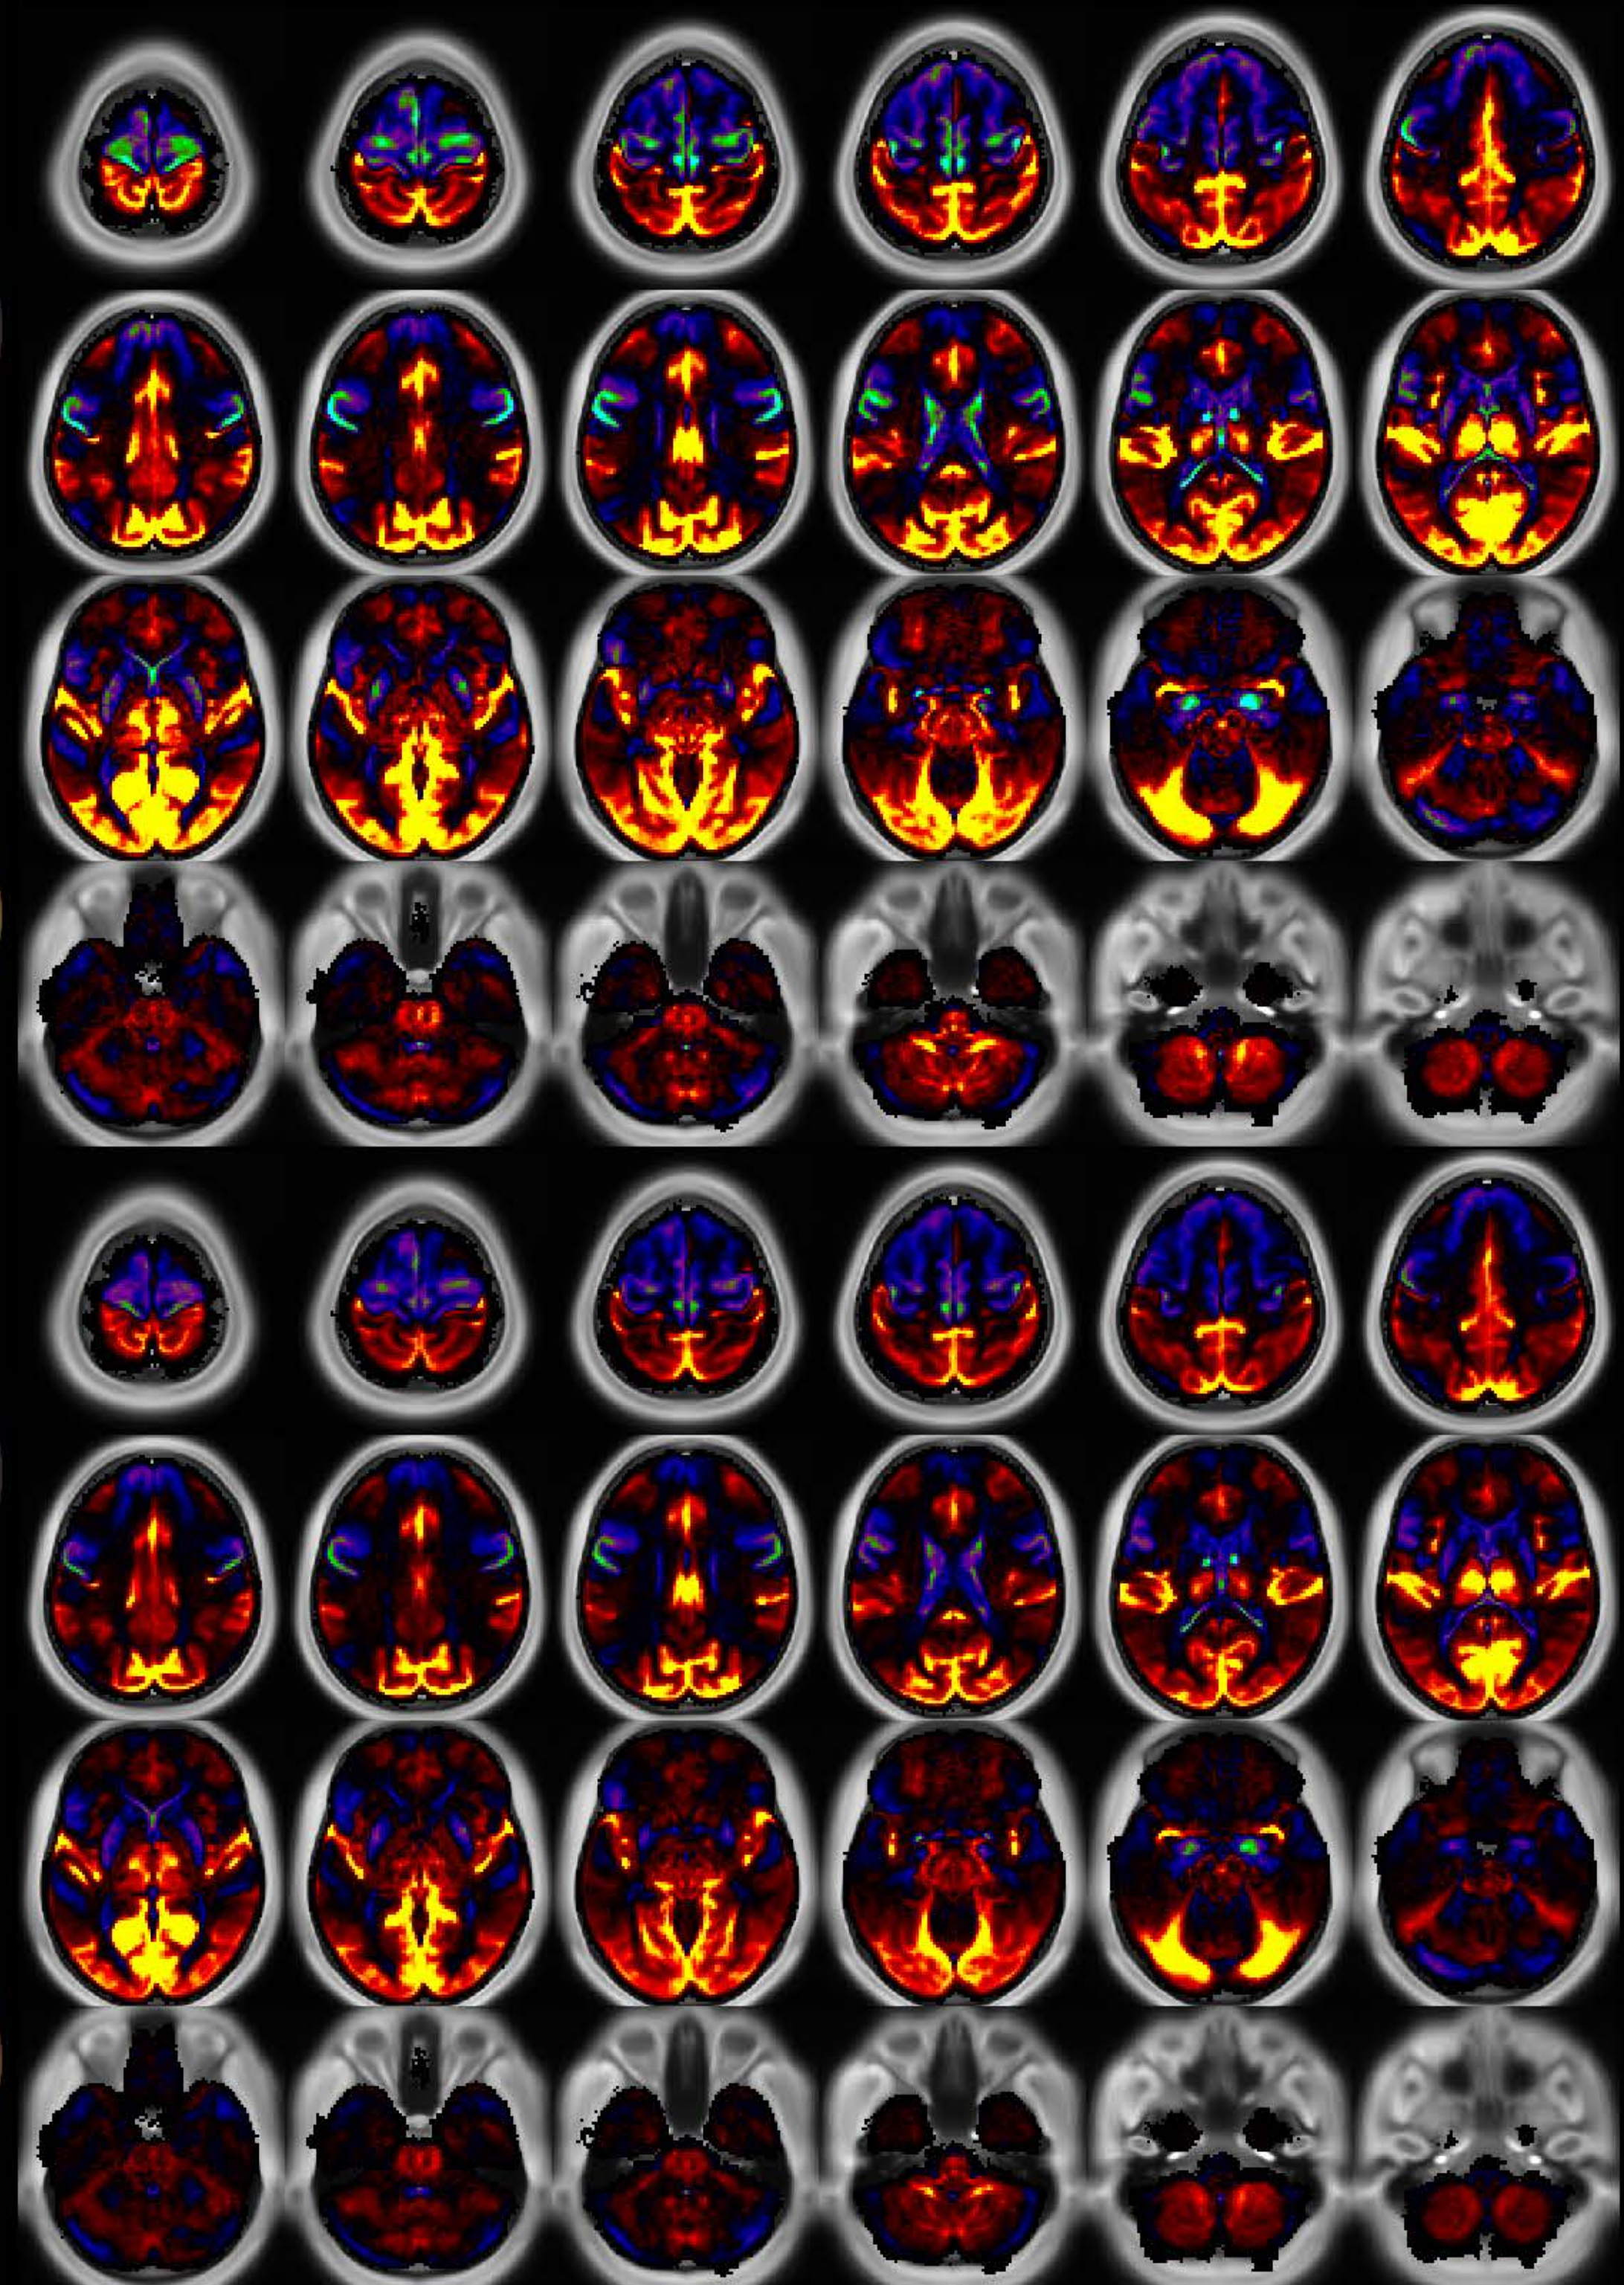

Seconds

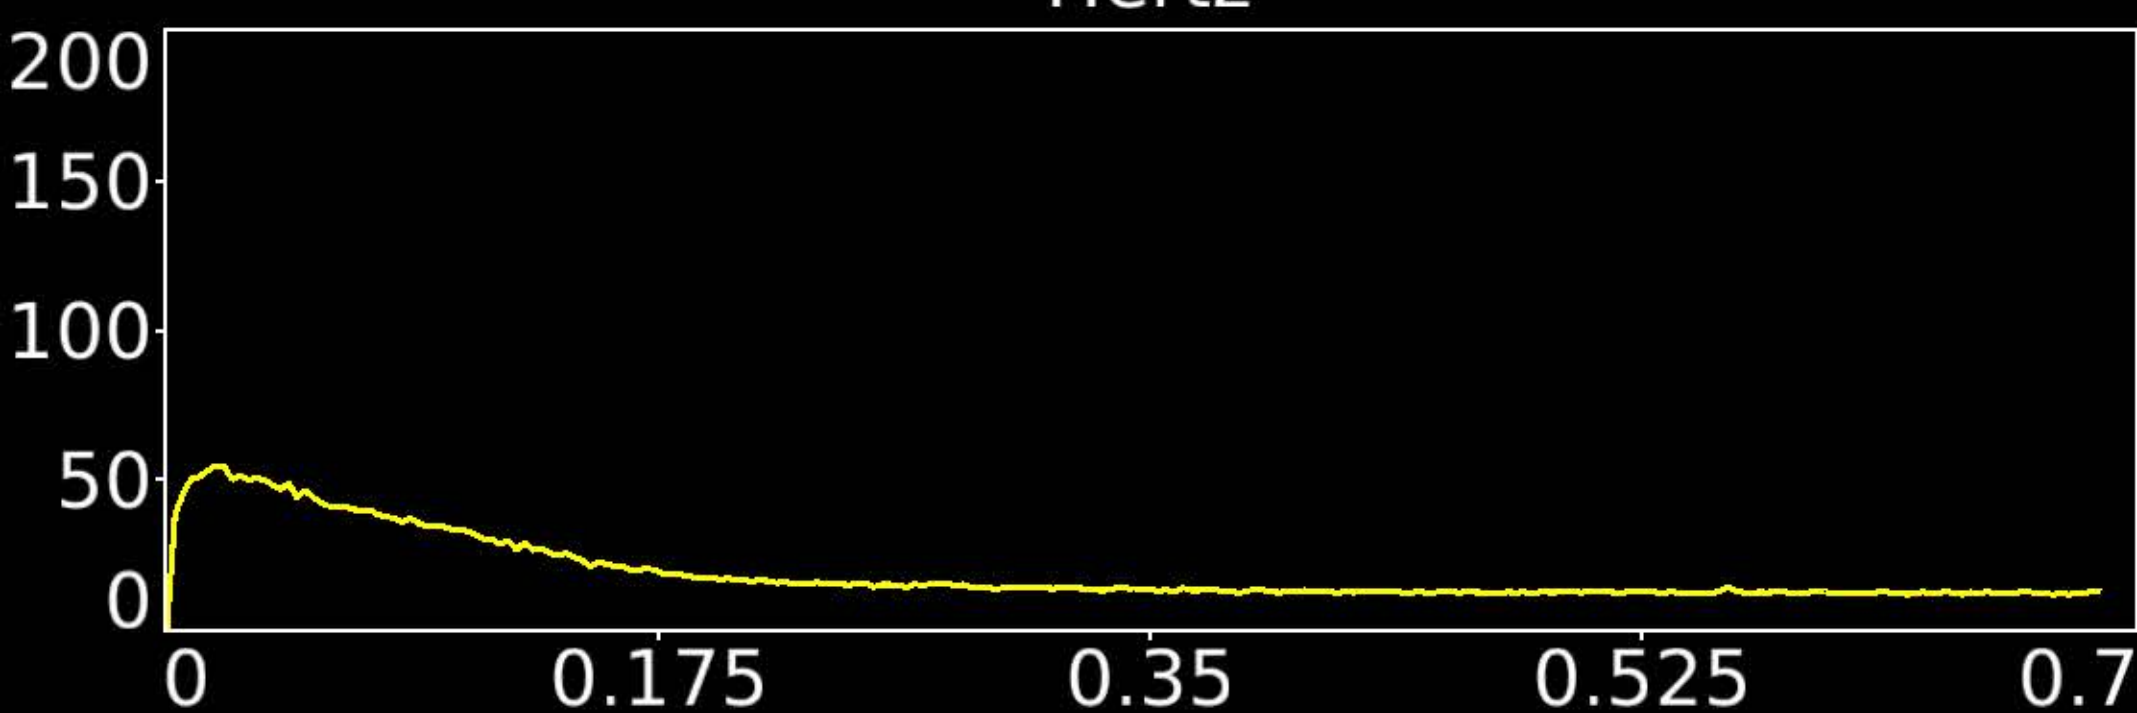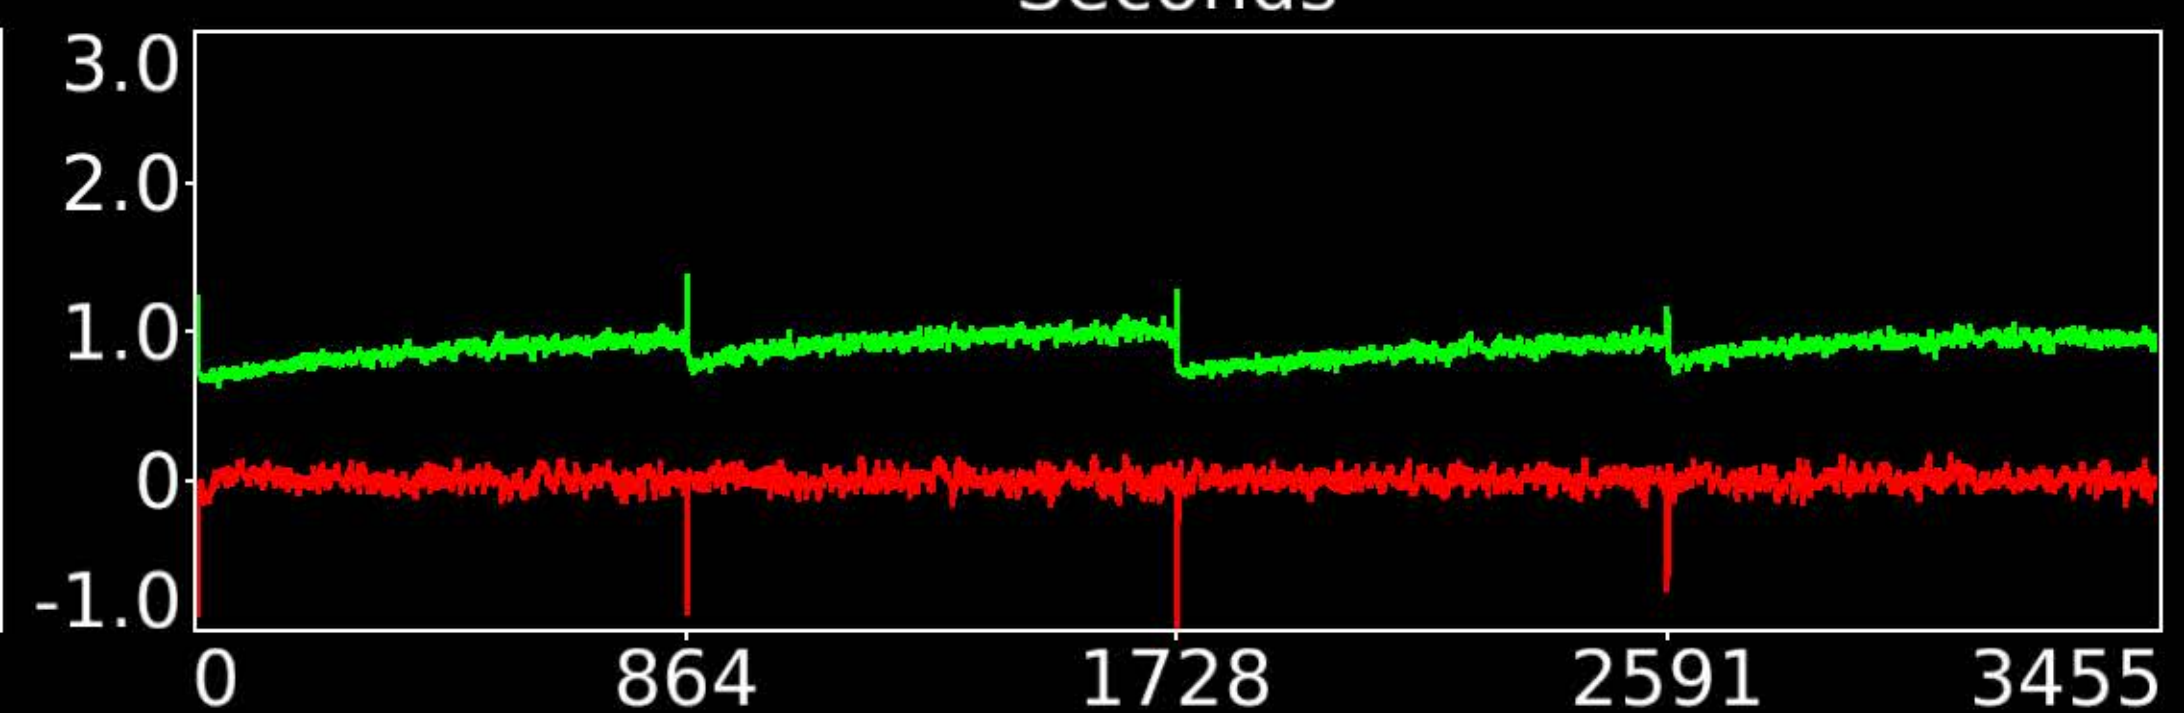

|                           |                            |                             |  |
|---------------------------|----------------------------|-----------------------------|--|
| Number & Class: 26 Signal |                            | Name: Sensory > Motor       |  |
| RVT Correlated: No        | DVARS Dip Associated: No   | Cross-Subject Variable: Yes |  |
| Single Subject: No        | % Variance Explained: 1.29 | Globality Index: 1.17       |  |
| Task Component: No        | Taskr Component: No        | Sleep Noted: No             |  |

Rationale: Spatial map includes positive and negative patches that respect known areal boundaries (e.g. PSL; 45; 55b; FEF)



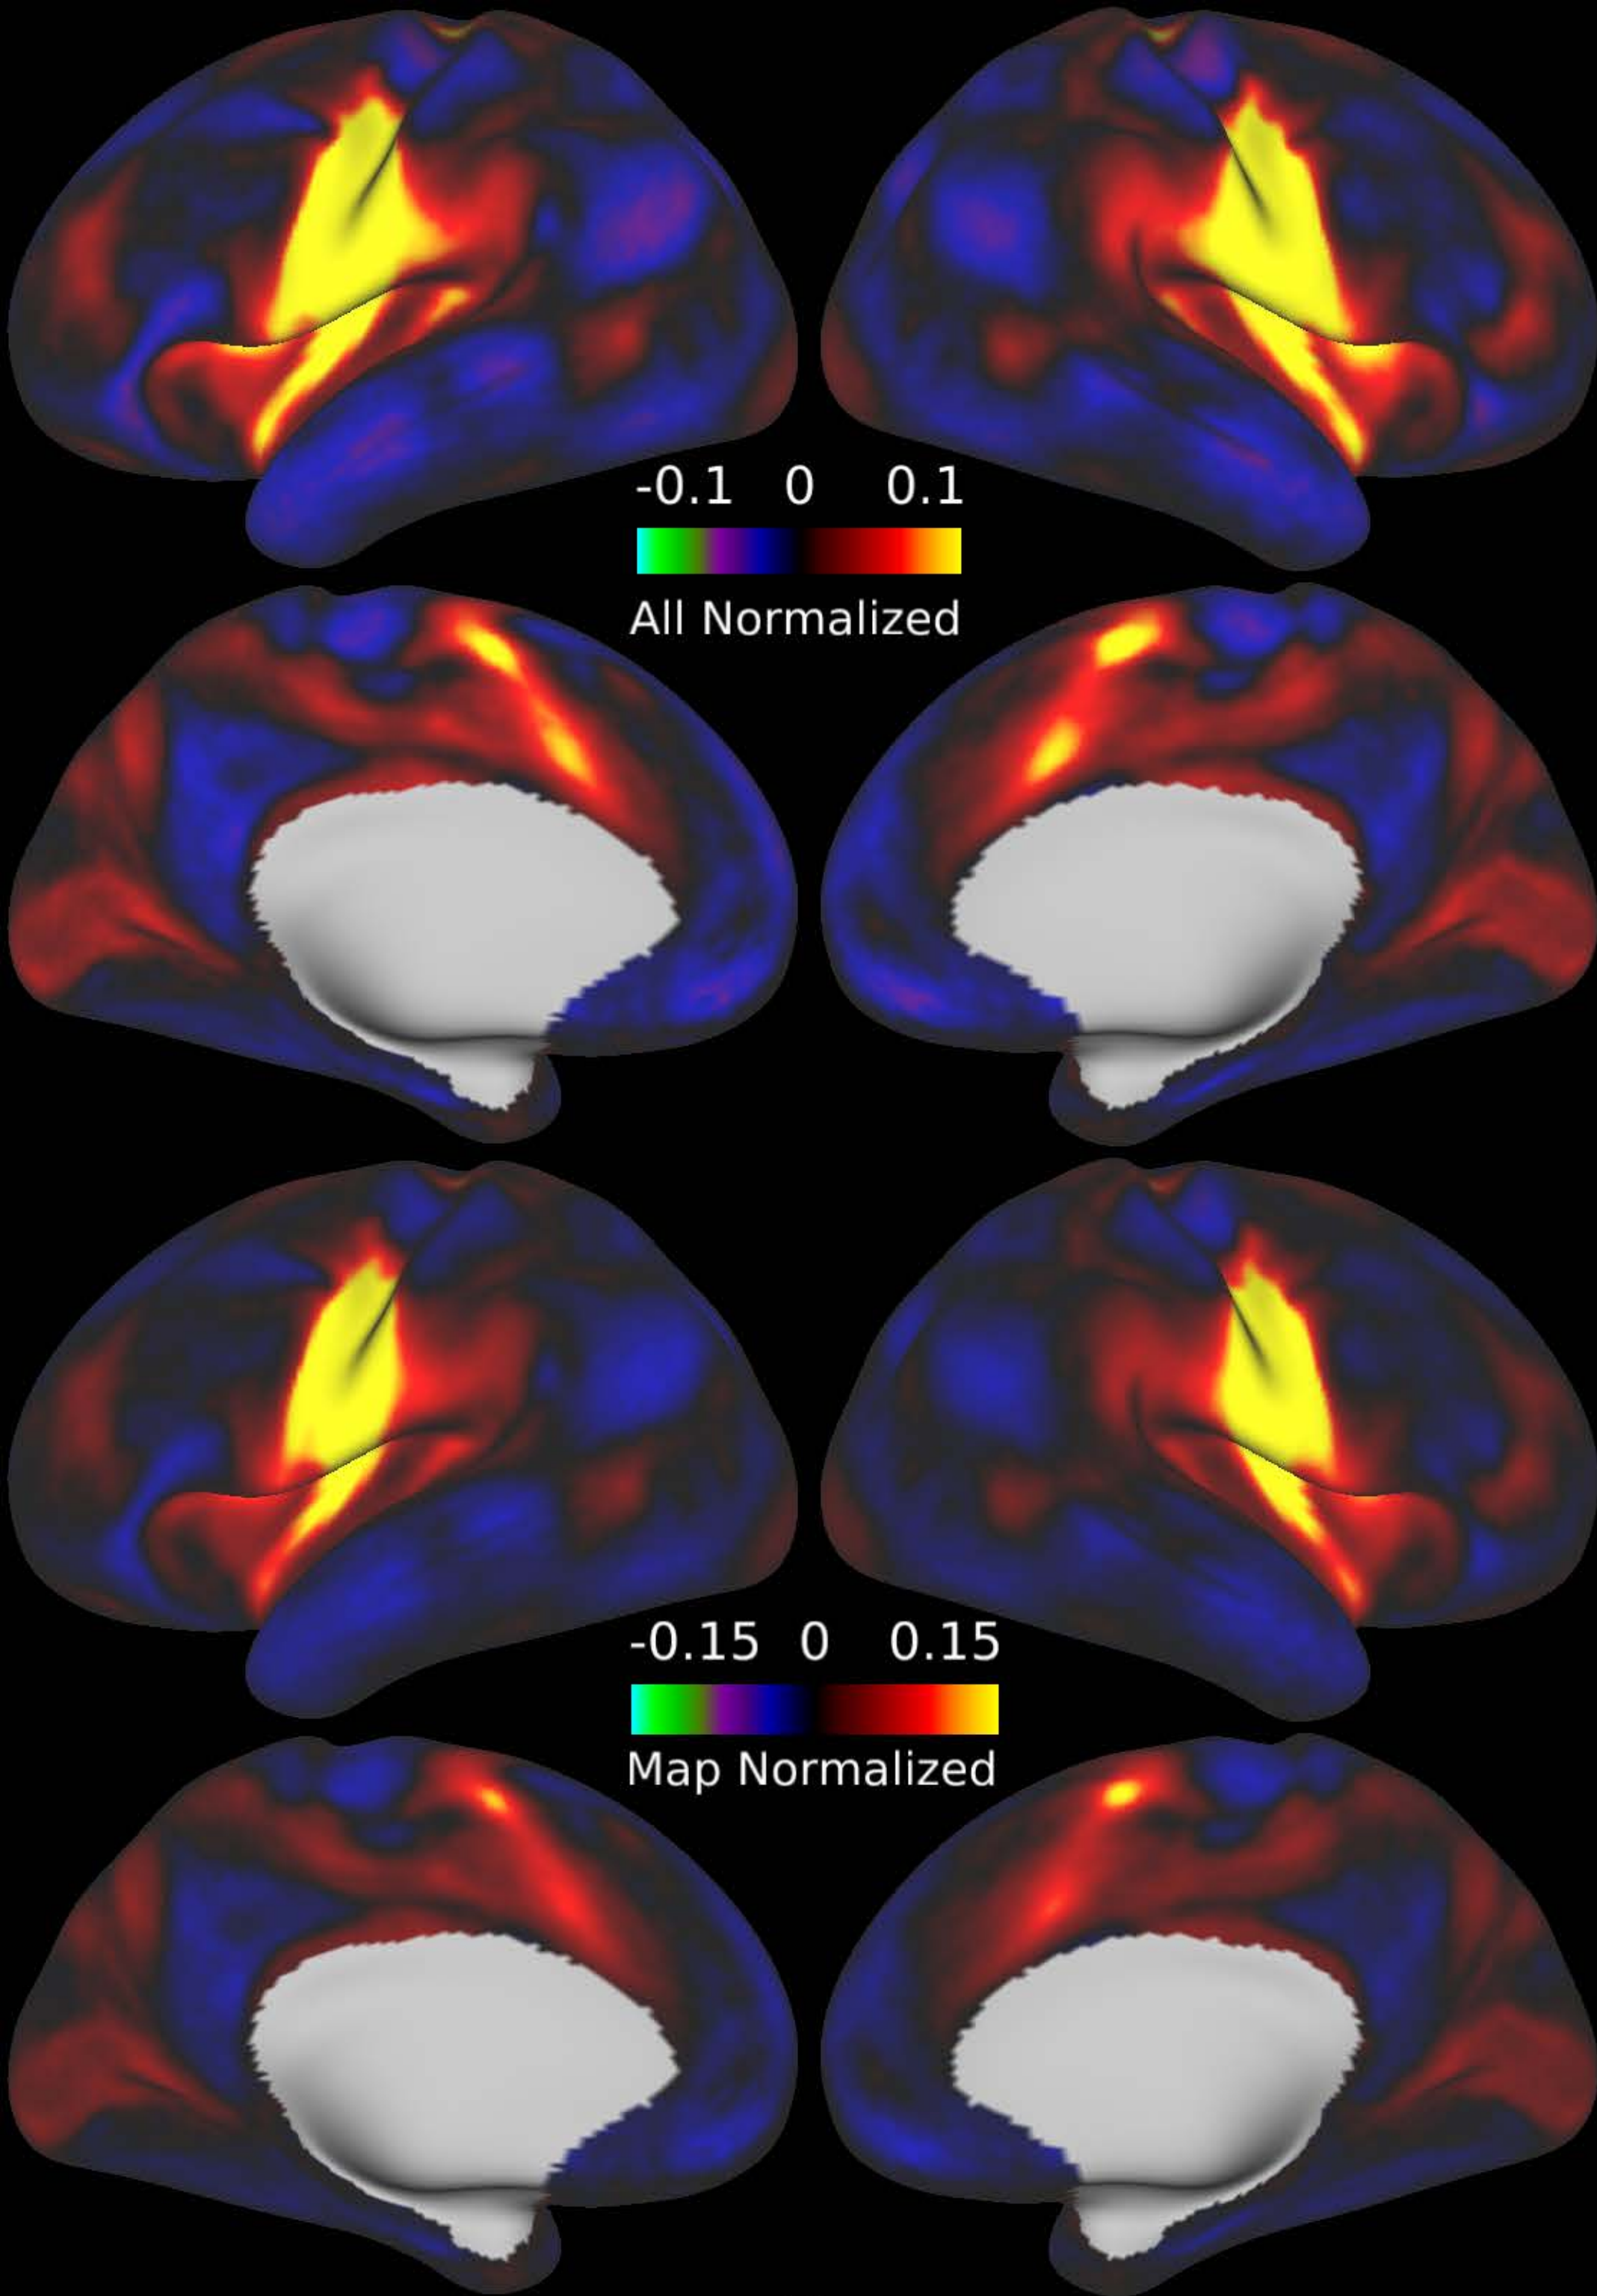

Hertz

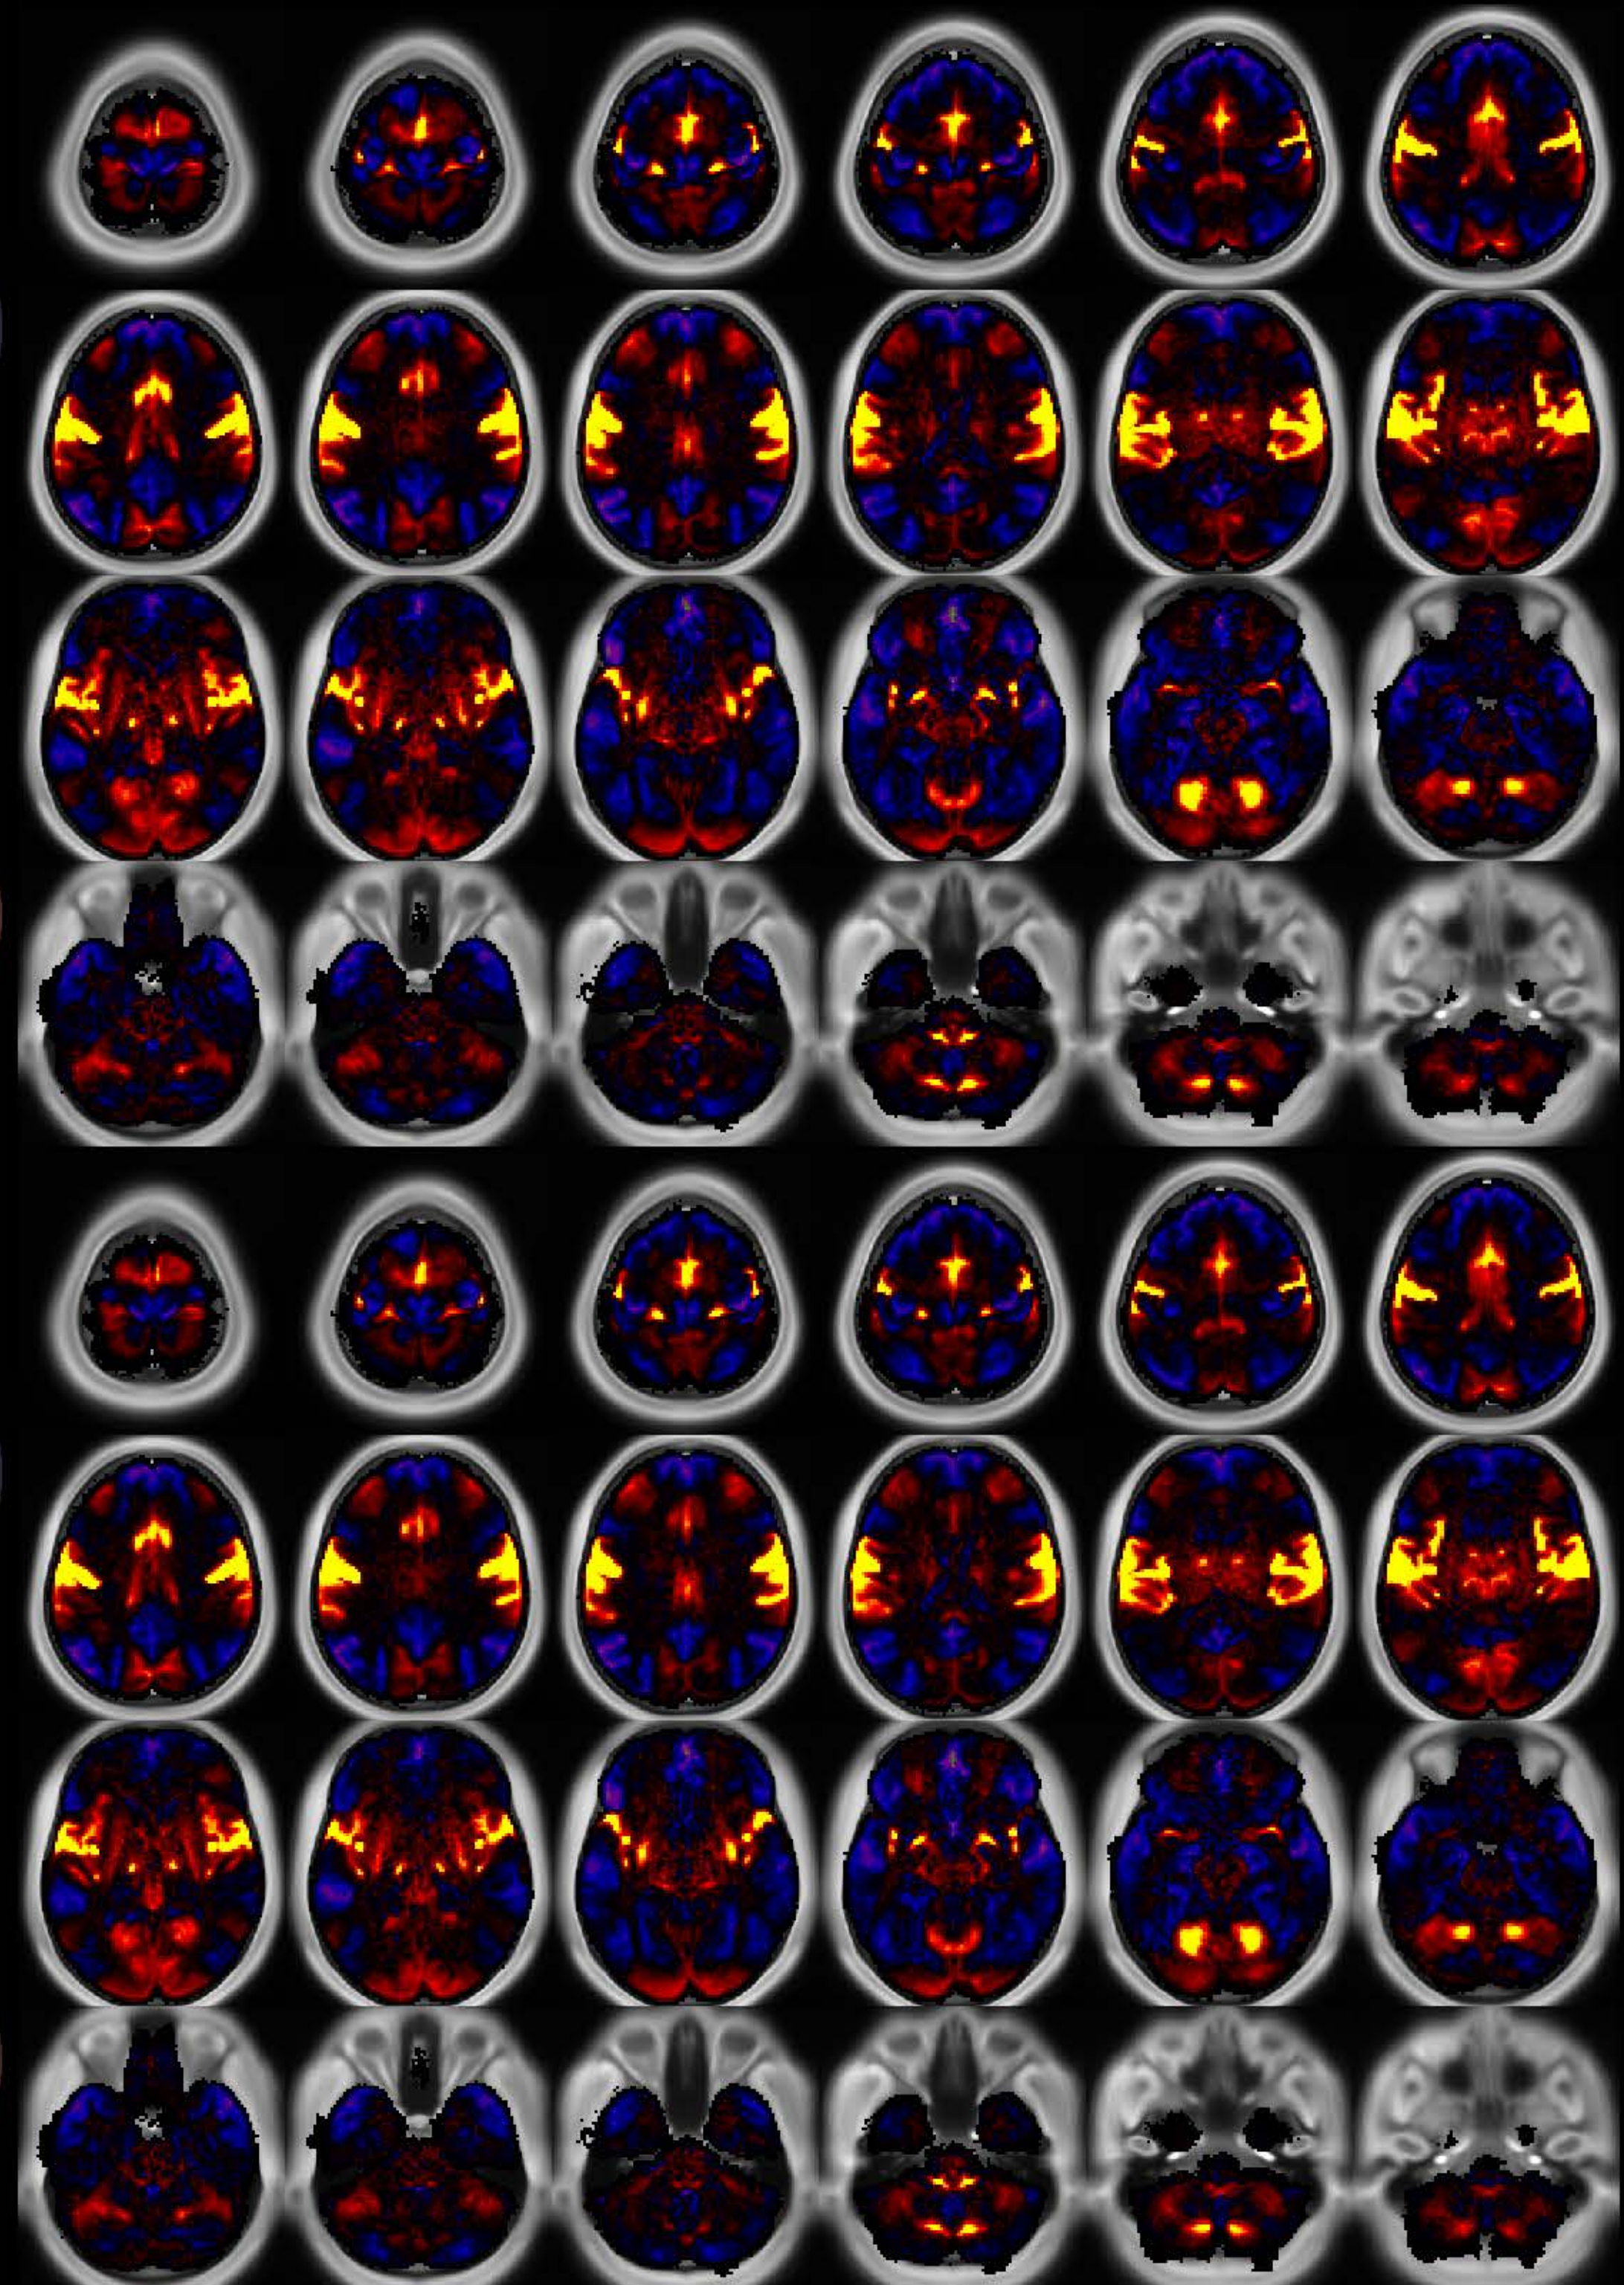

Seconds

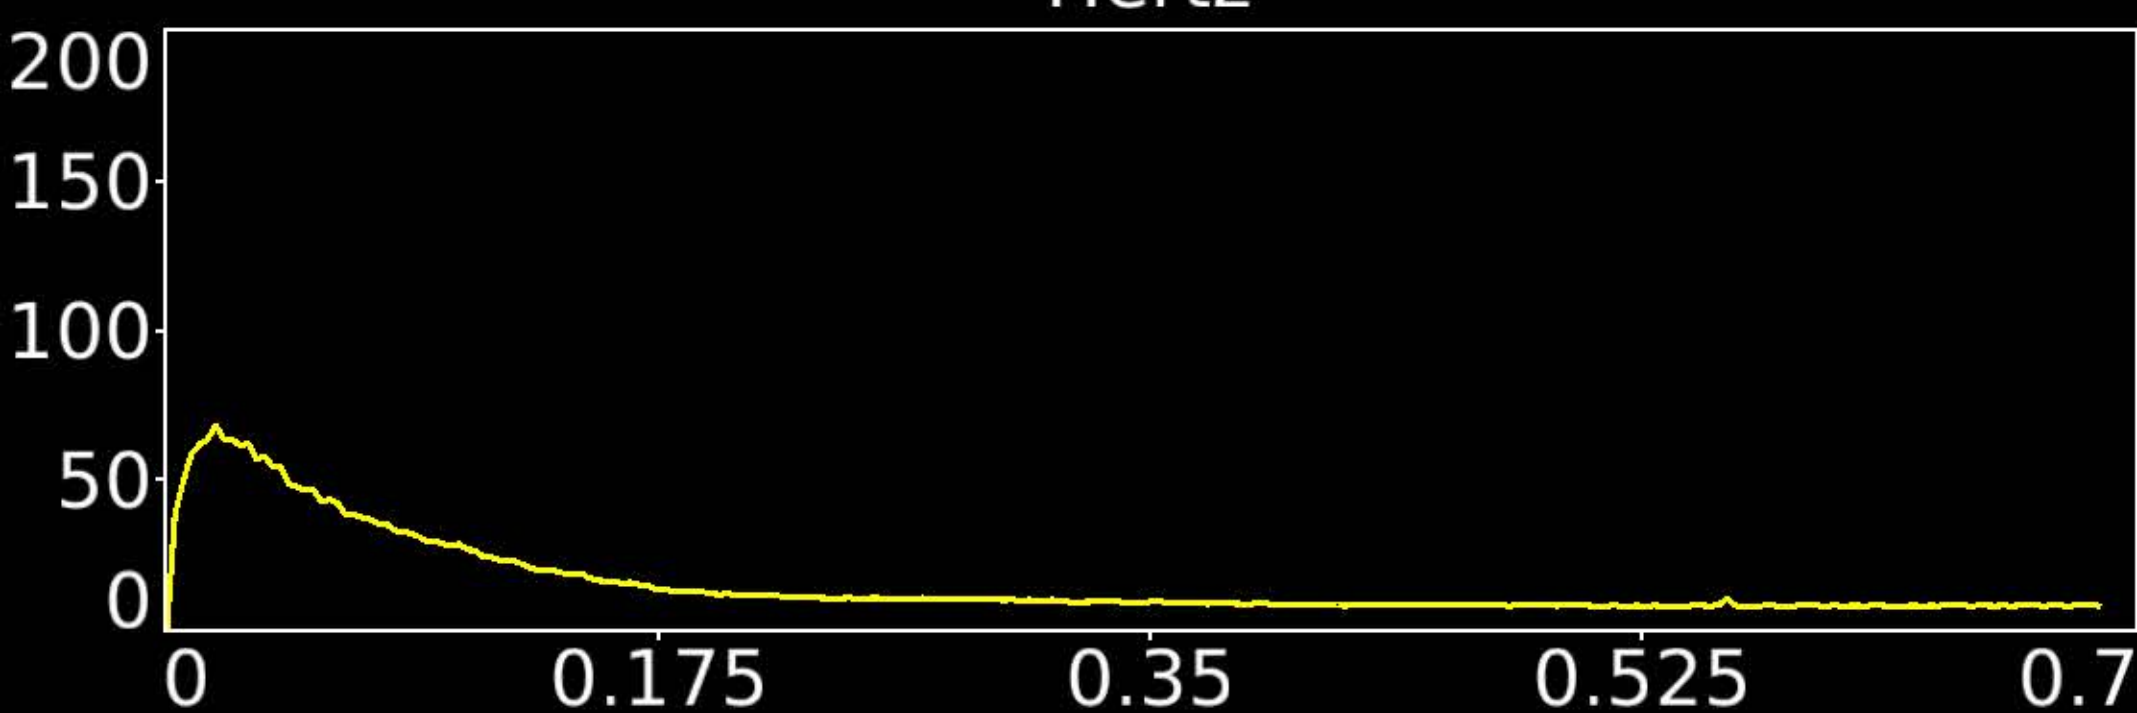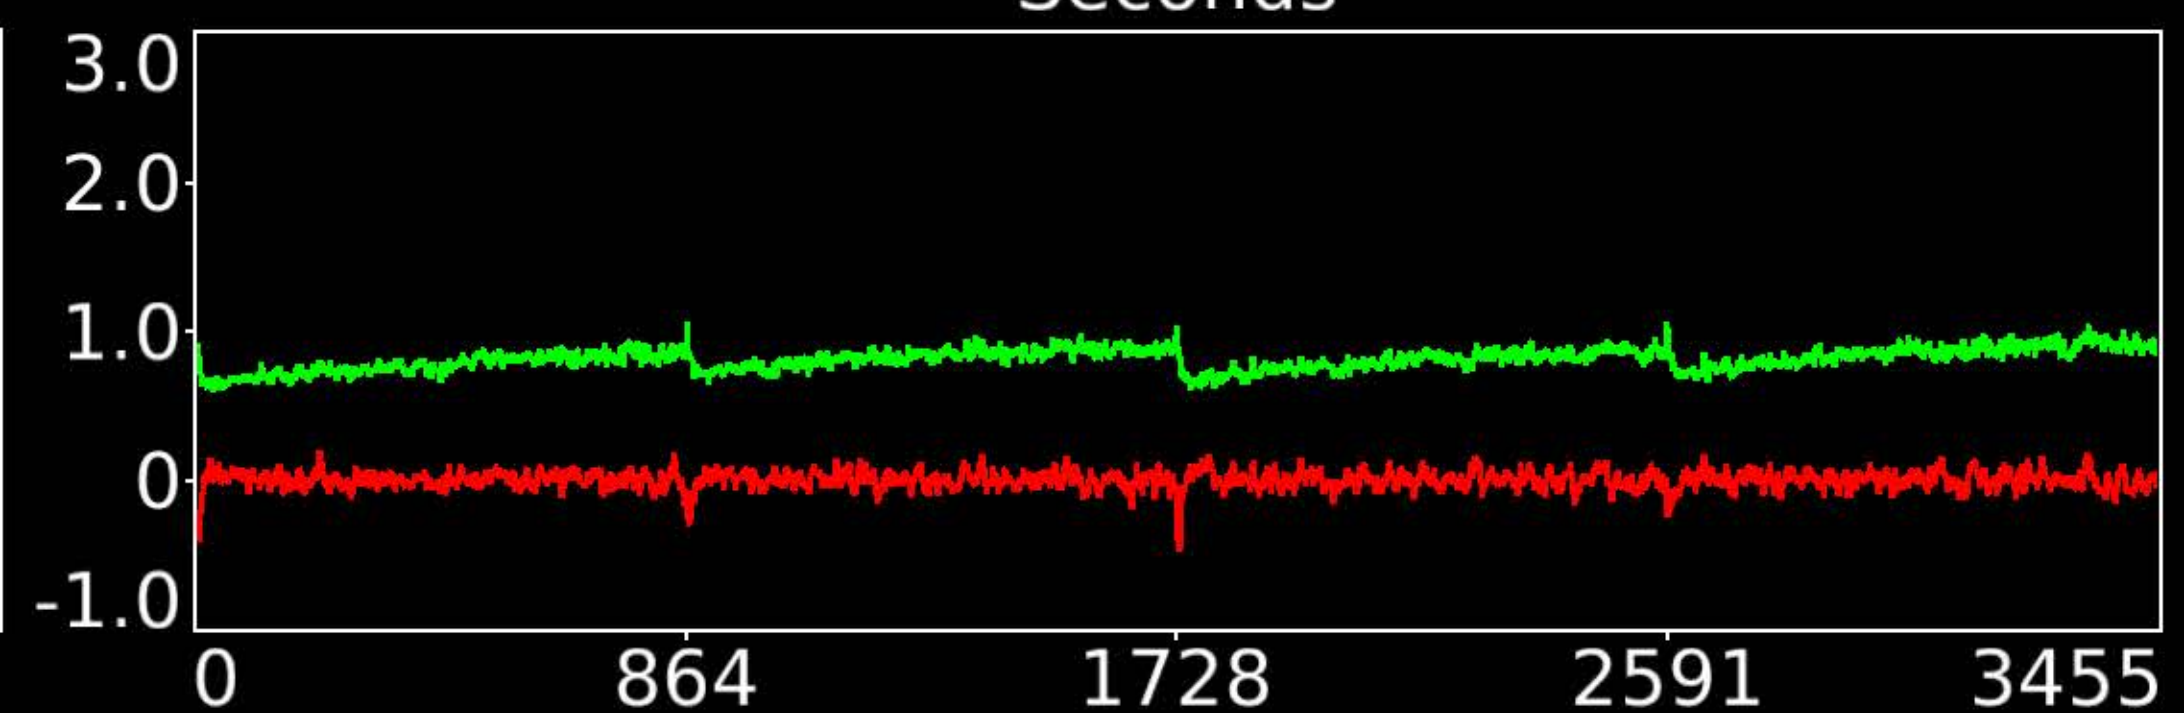

|                           |                            |                             |  |
|---------------------------|----------------------------|-----------------------------|--|
| Number & Class: 27 Signal |                            | Name: Head Motor Network    |  |
| RVT Correlated: No        | DVARS Dip Associated: Yes  | Cross-Subject Variable: Yes |  |
| Single Subject: No        | % Variance Explained: 1.23 | Globality Index: 0.45       |  |
| Task Component: 16        | Taskr Component: 18        | Sleep Noted: No             |  |

Rationale: Spatial map includes positive and negative patches that respect known somatotopic sensori-motor organization (Face)



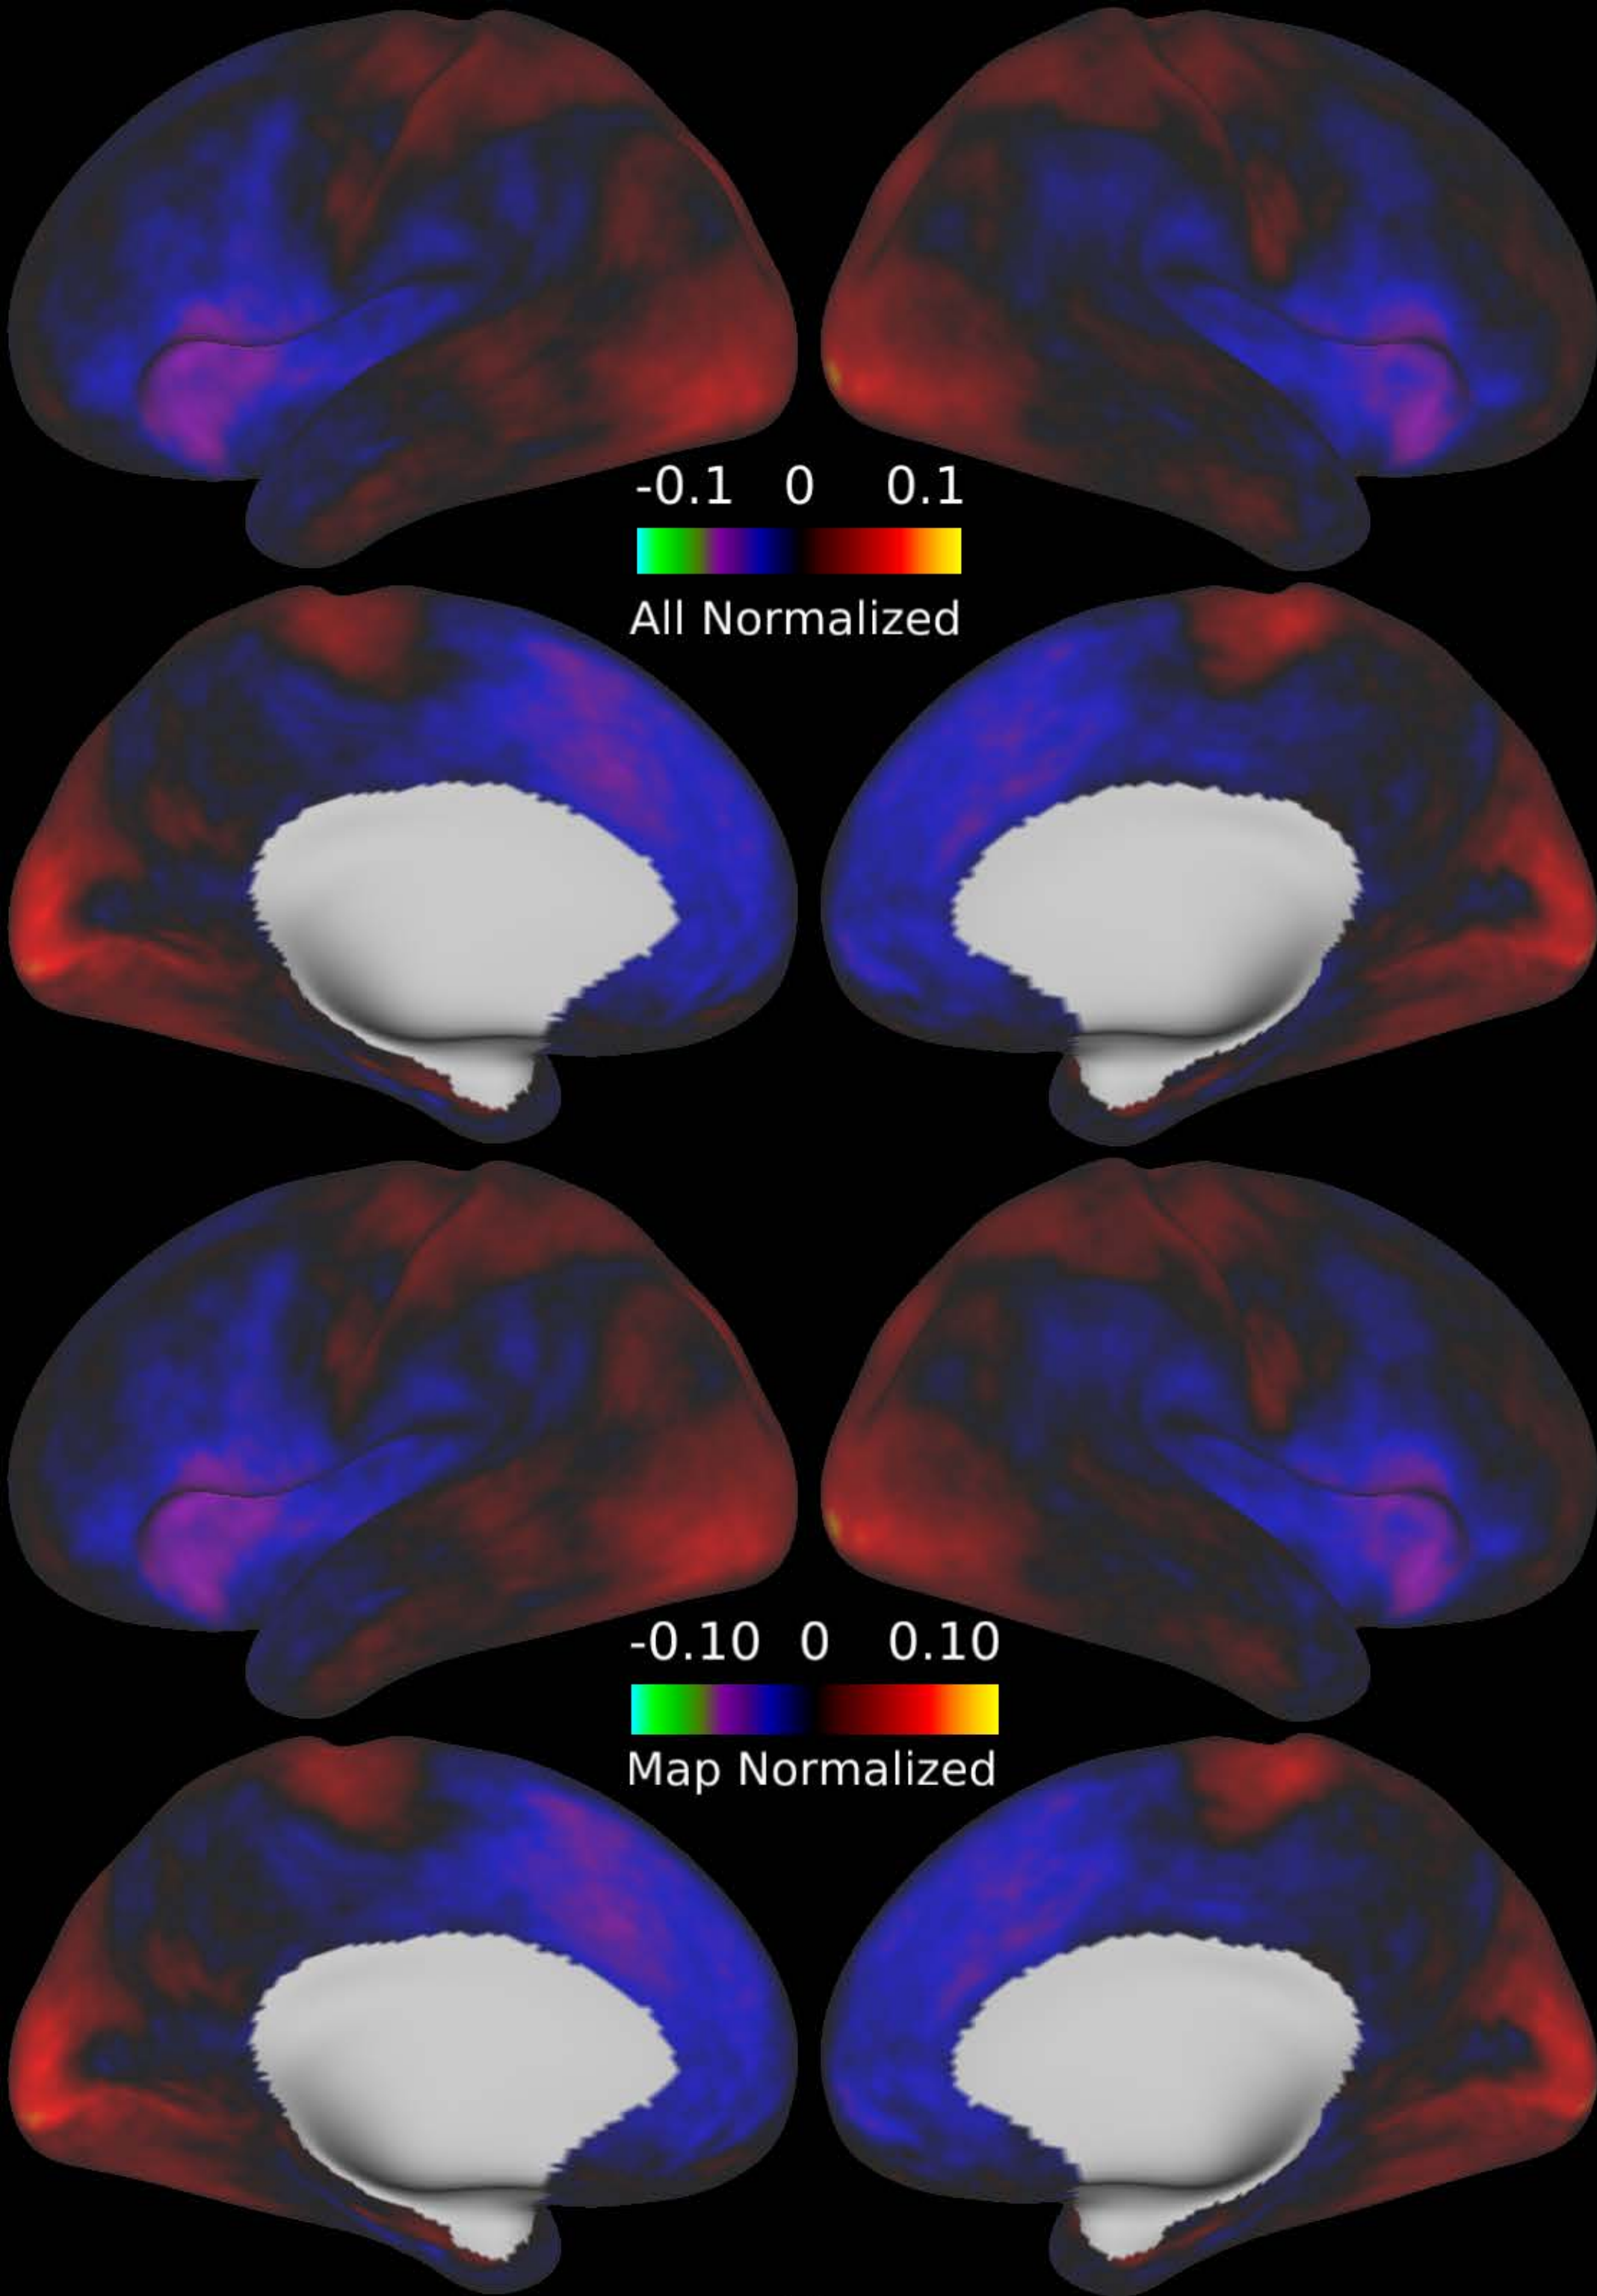

Hertz

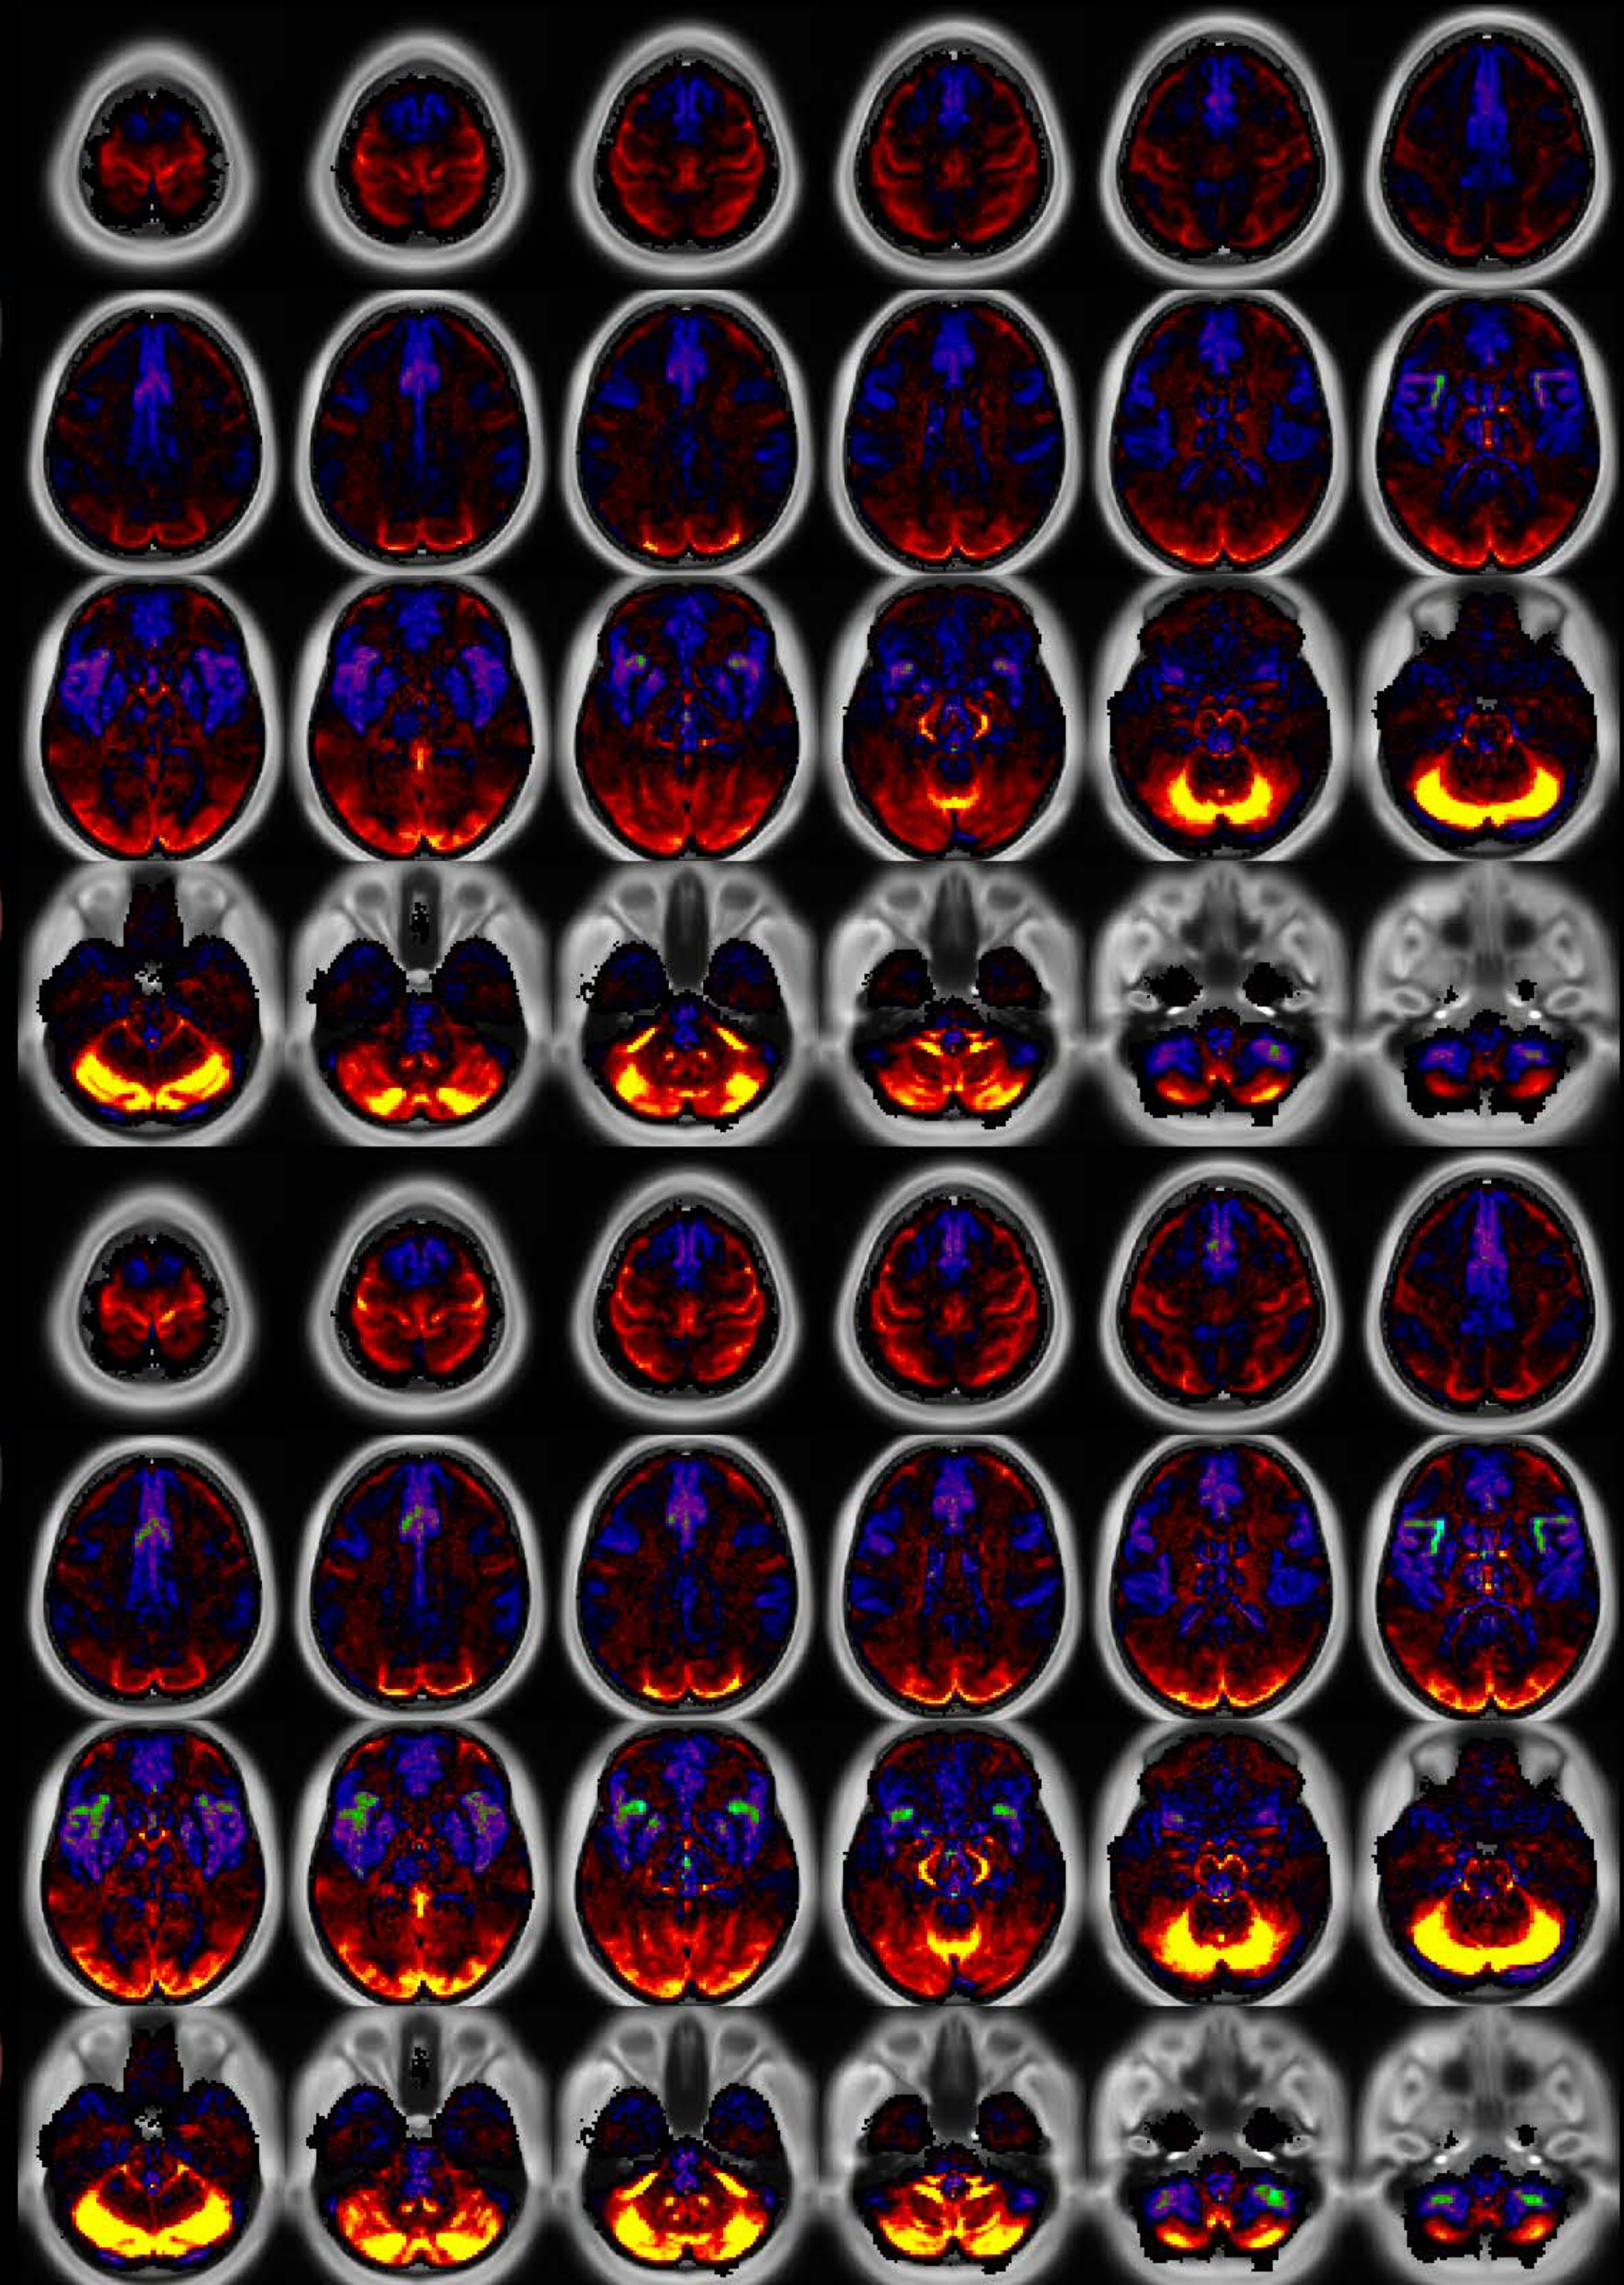

Seconds

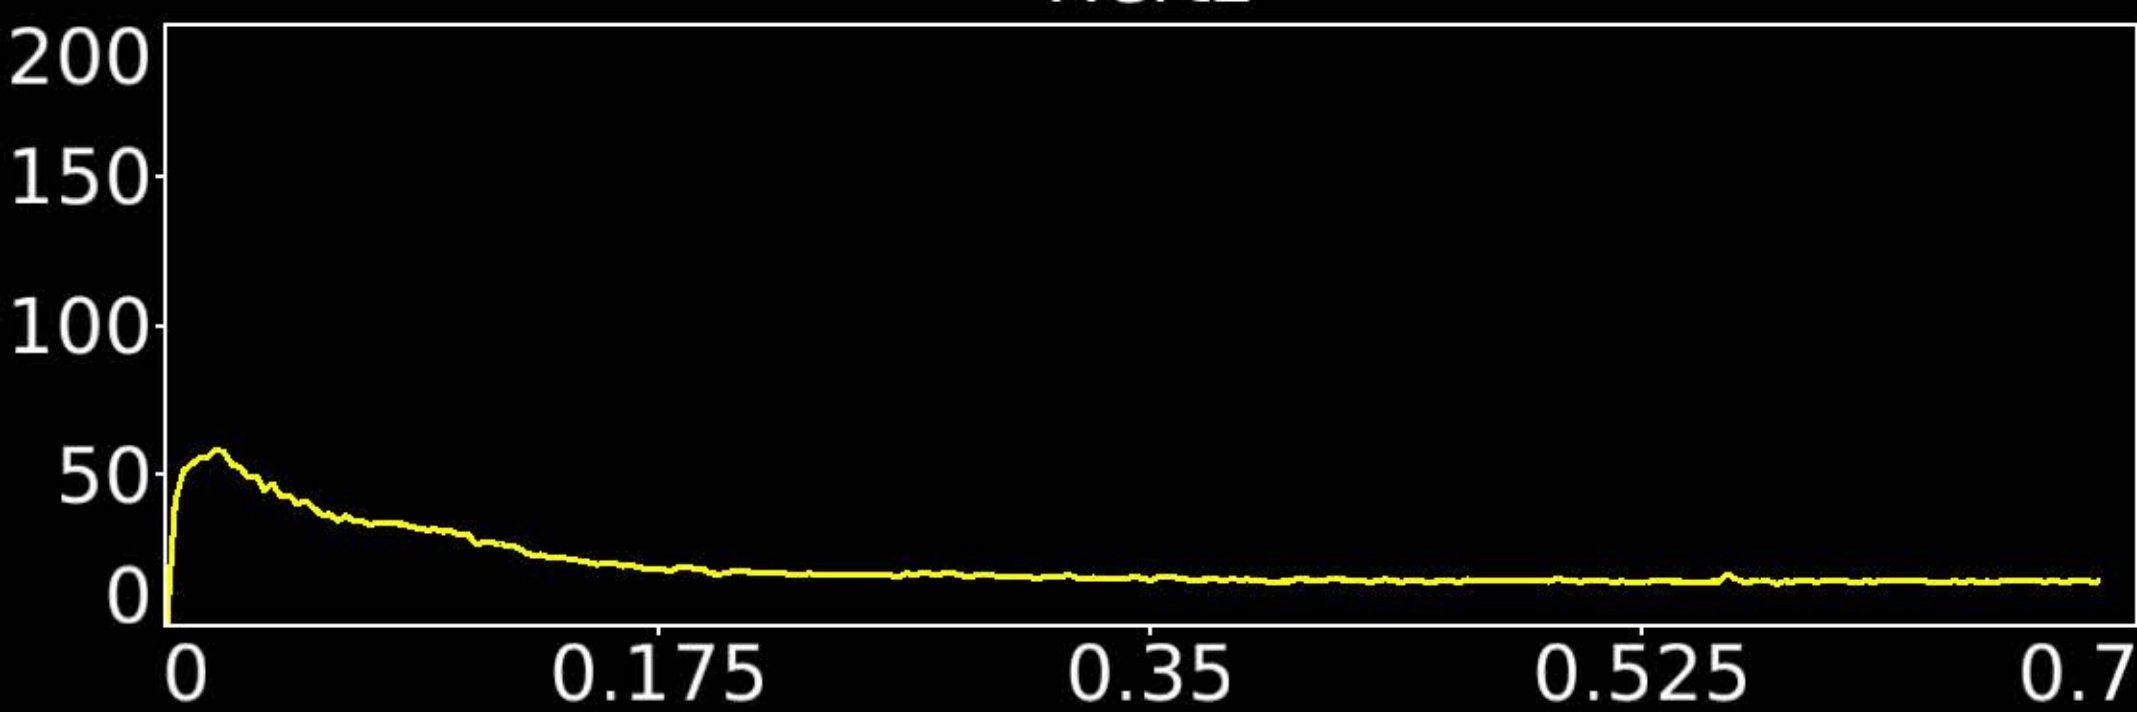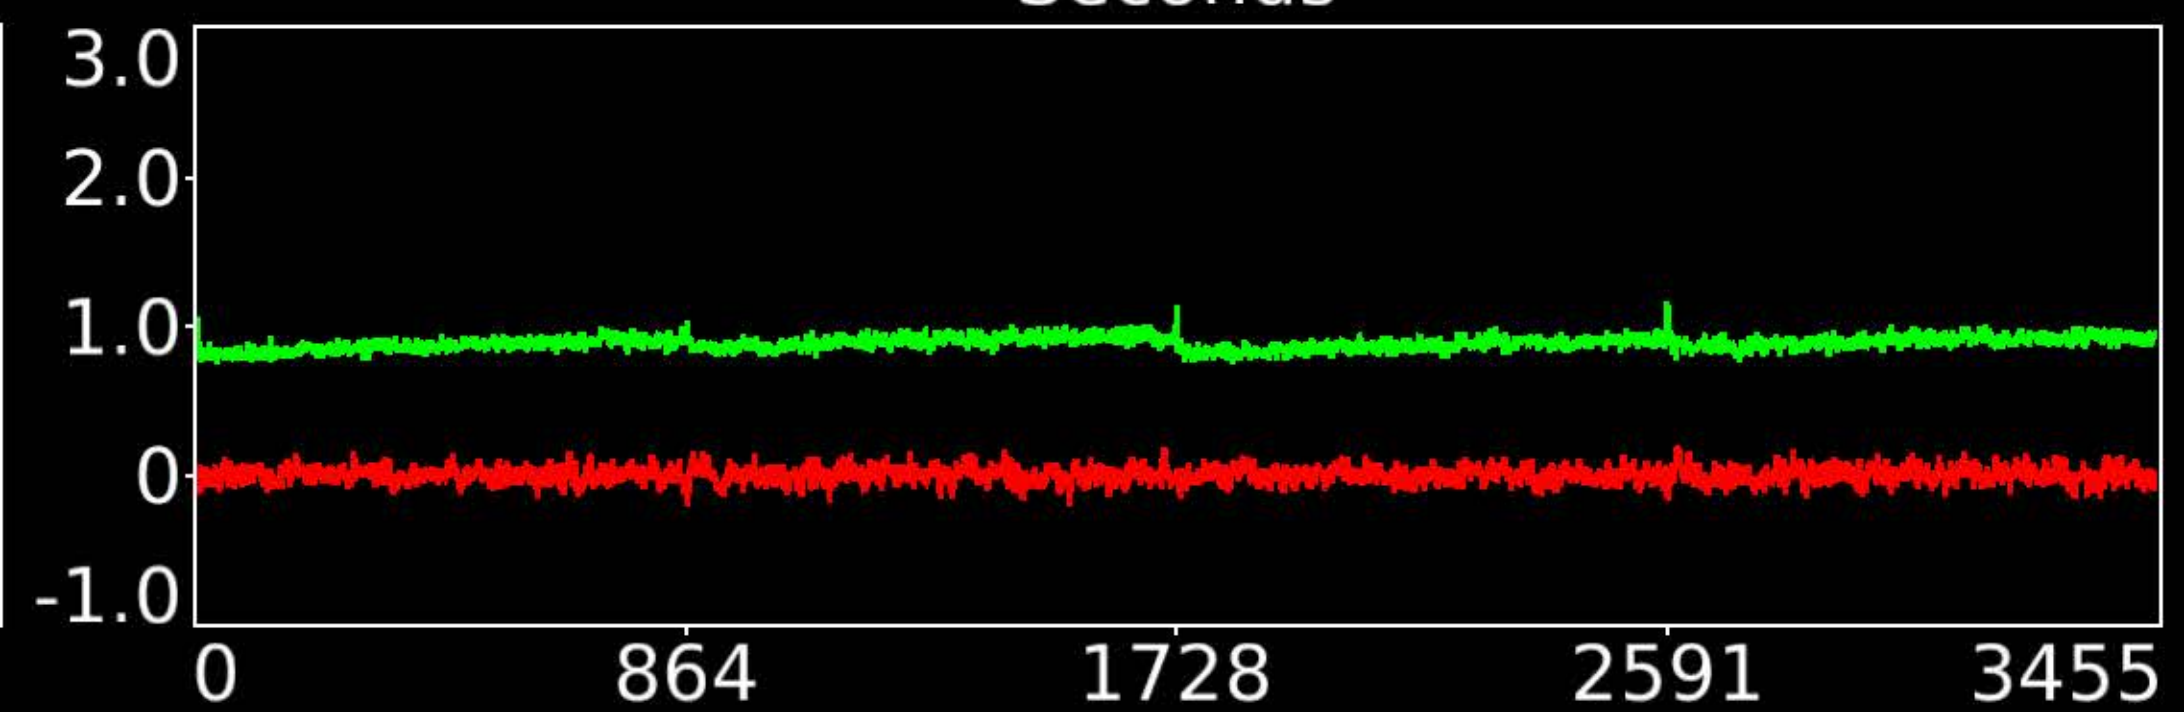

|                          |                            |                               |  |
|--------------------------|----------------------------|-------------------------------|--|
| Number & Class: 28 Noise |                            | Name: Veins + WM + Cerebellum |  |
| RVT Correlated: No       | DVARS Dip Associated: Yes  | Cross-Subject Variable: No    |  |
| Single Subject: No       | % Variance Explained: 1.15 | Globality Index: 0.21         |  |
| Task Component: 8        | Taskr Component: 5         | Sleep Noted: No               |  |

Rationale: Spatial map contains substantial white matter and venous signal; positive and negative patches do not reflect known areal boundaries



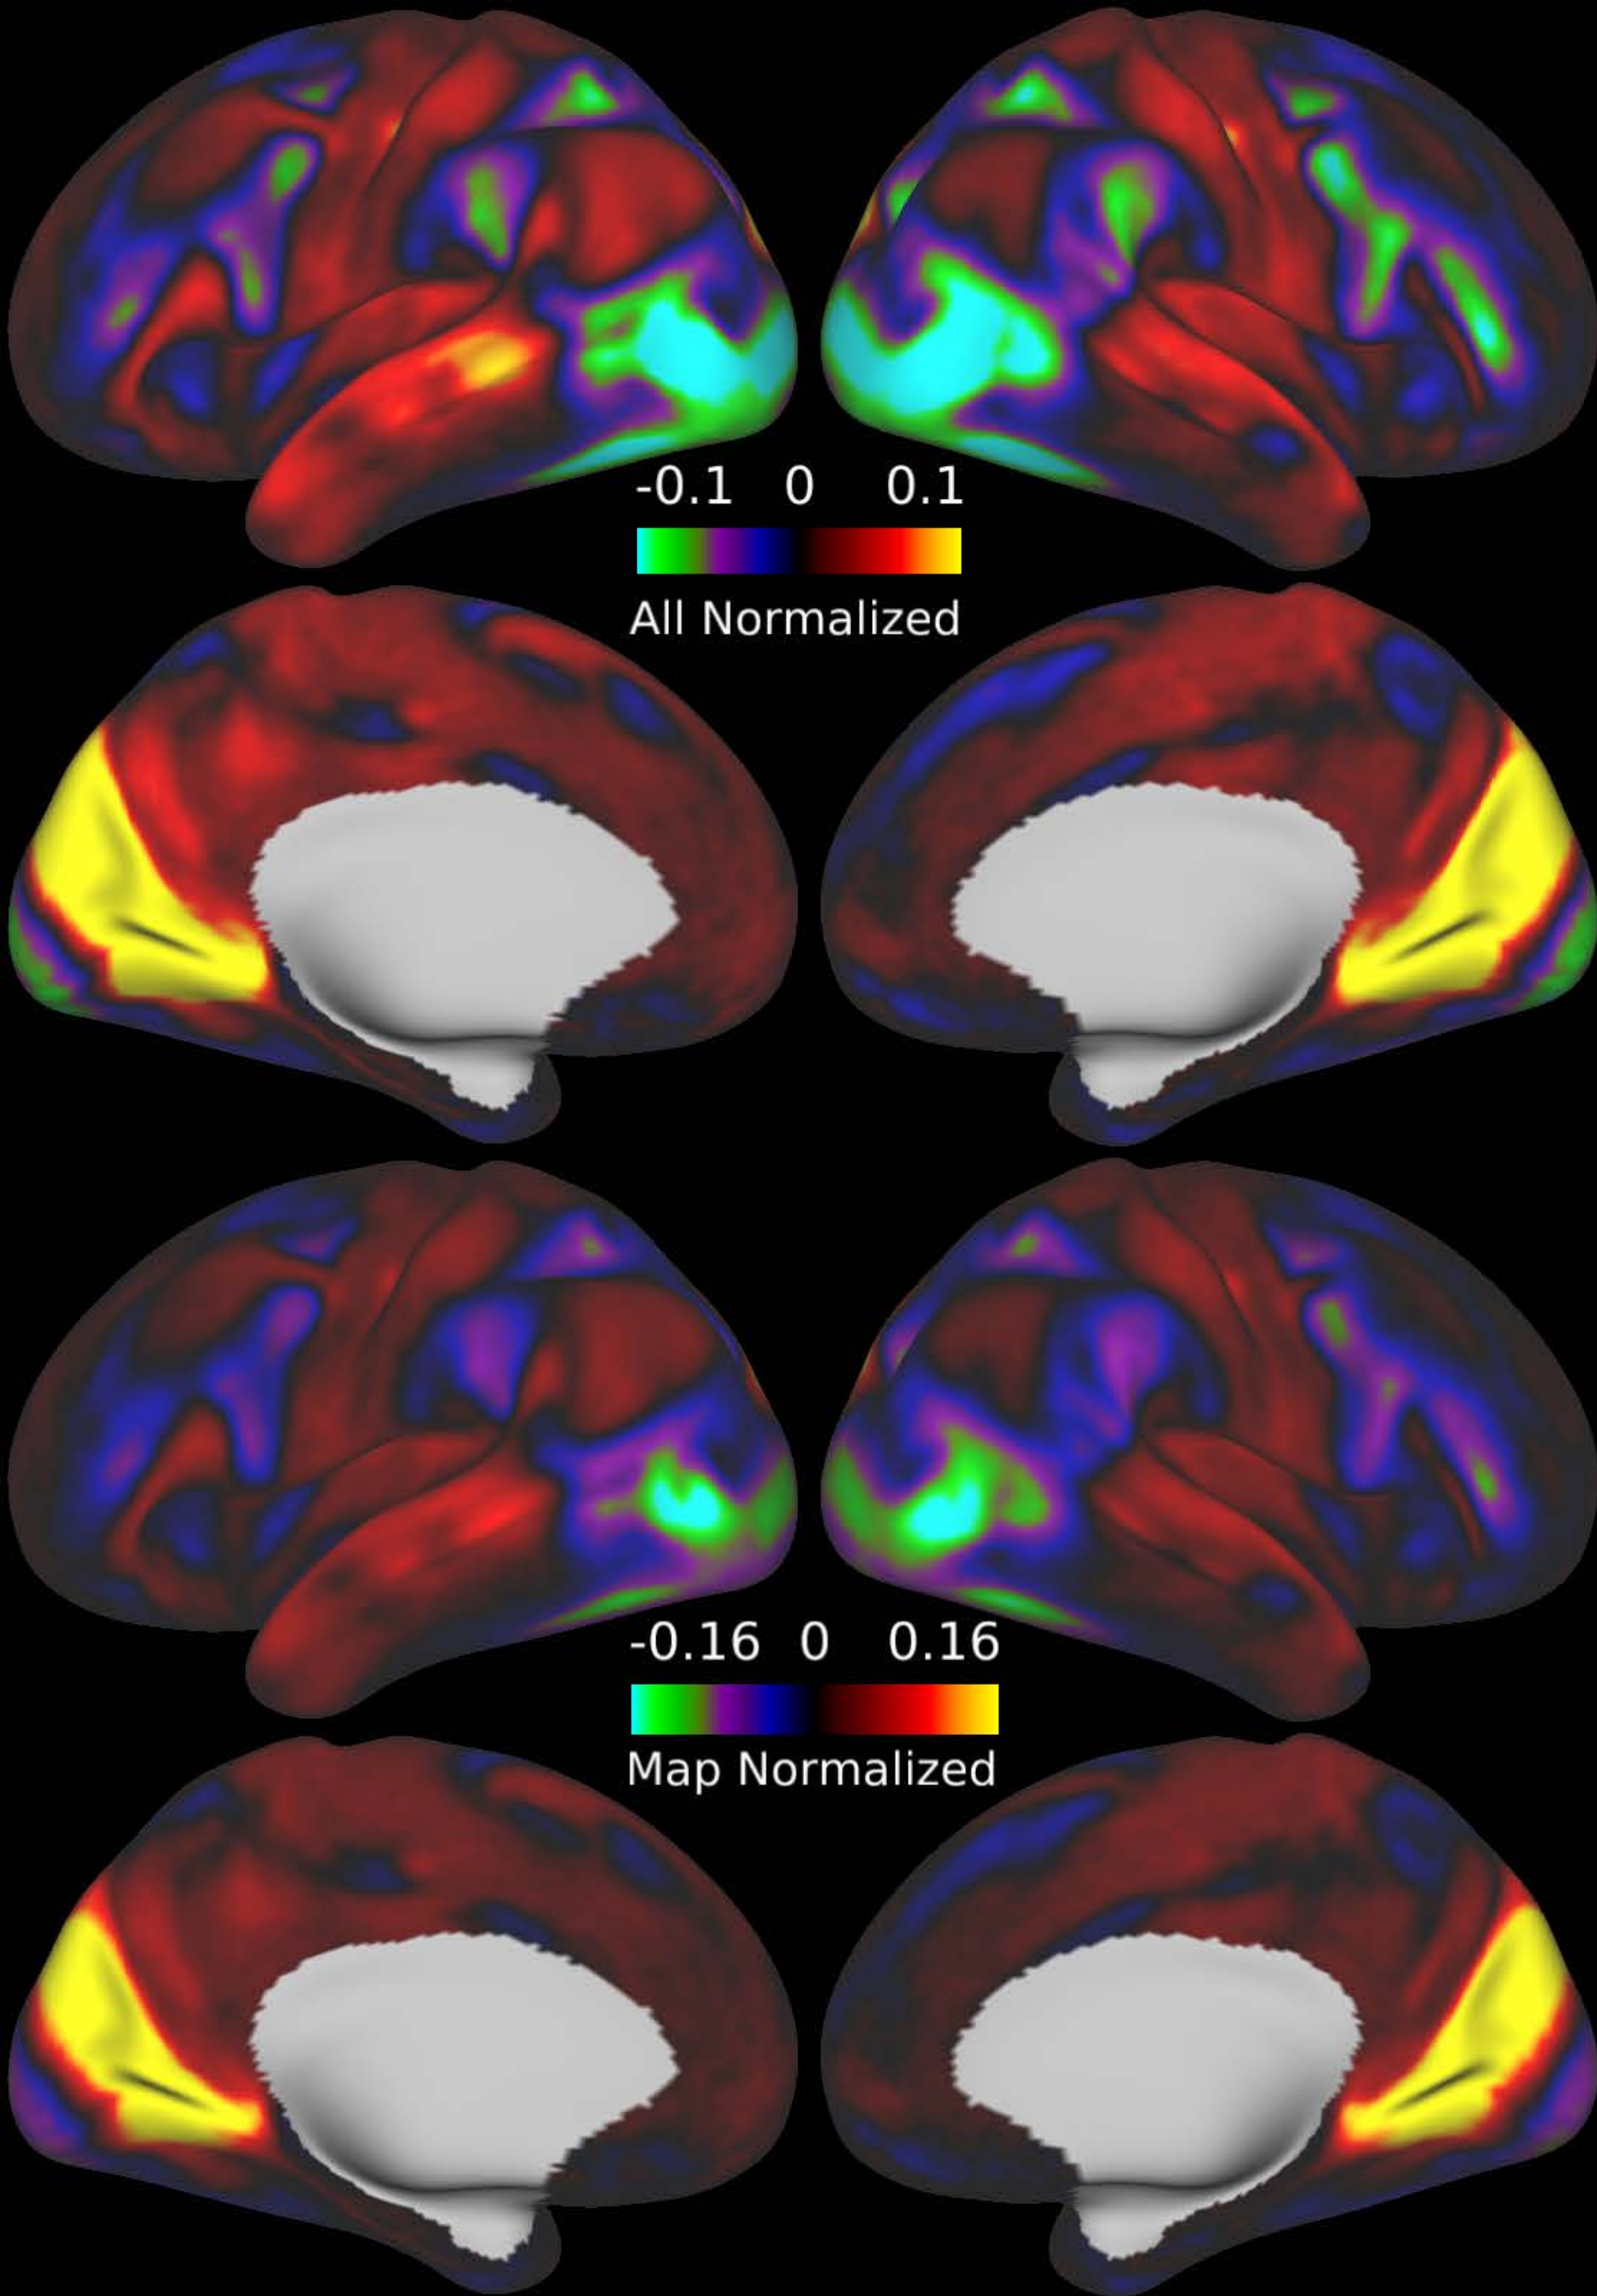

Hertz

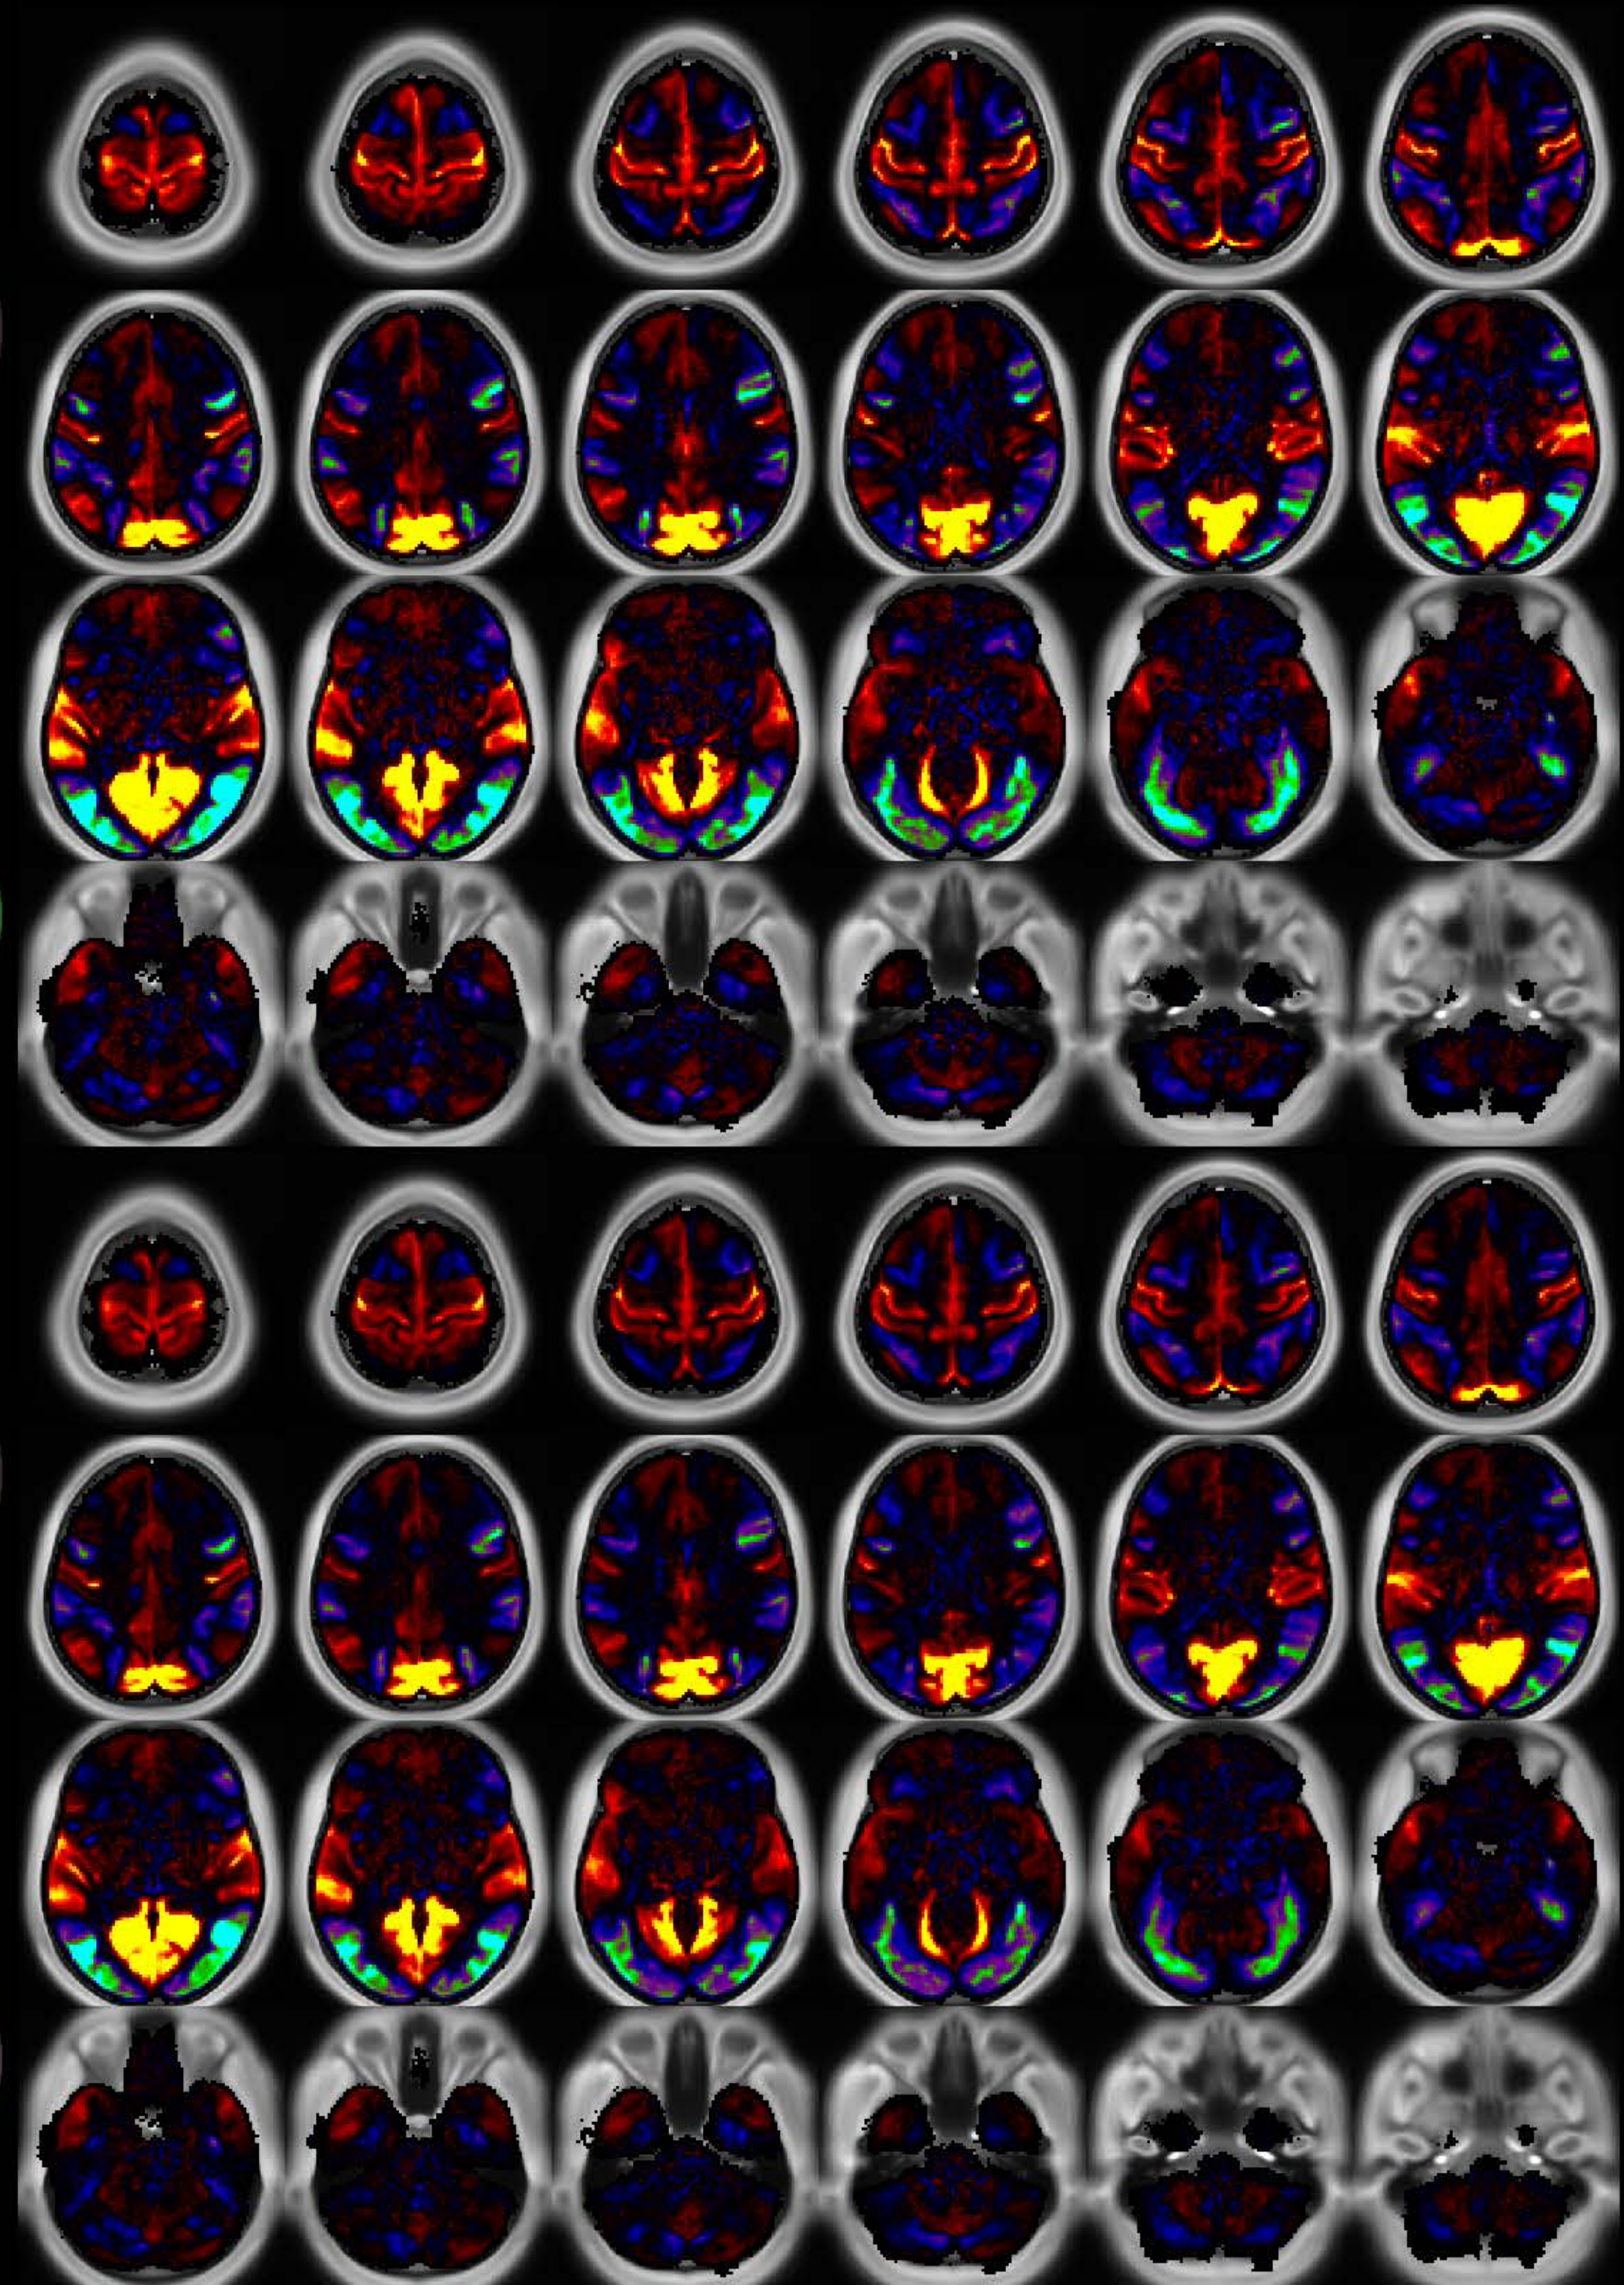

Seconds

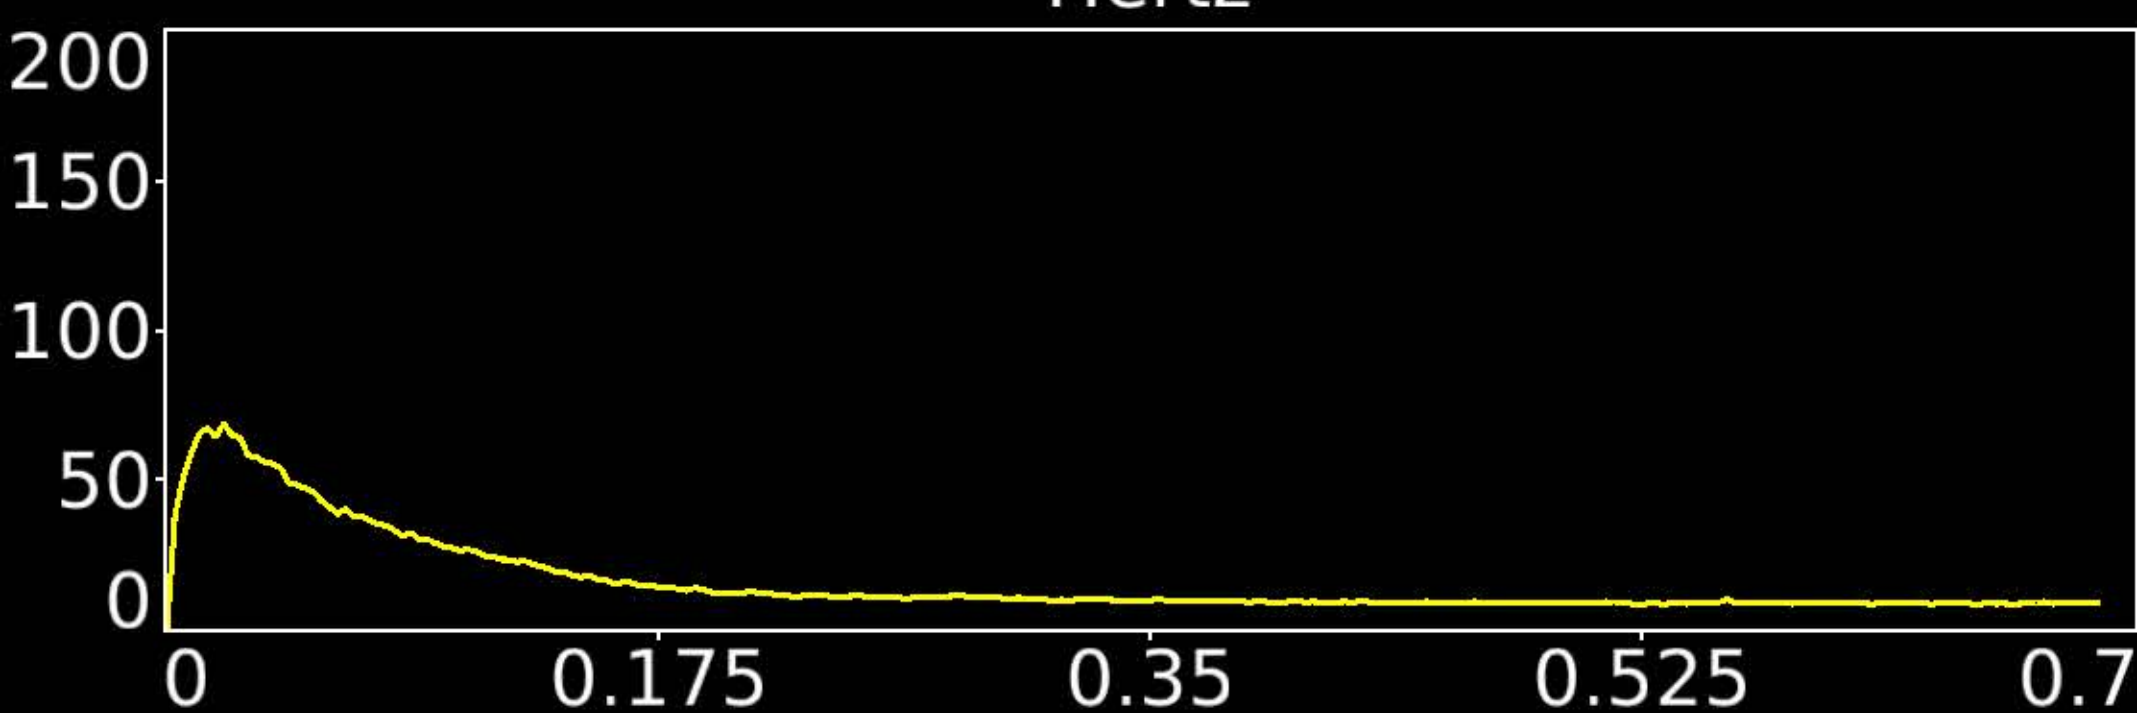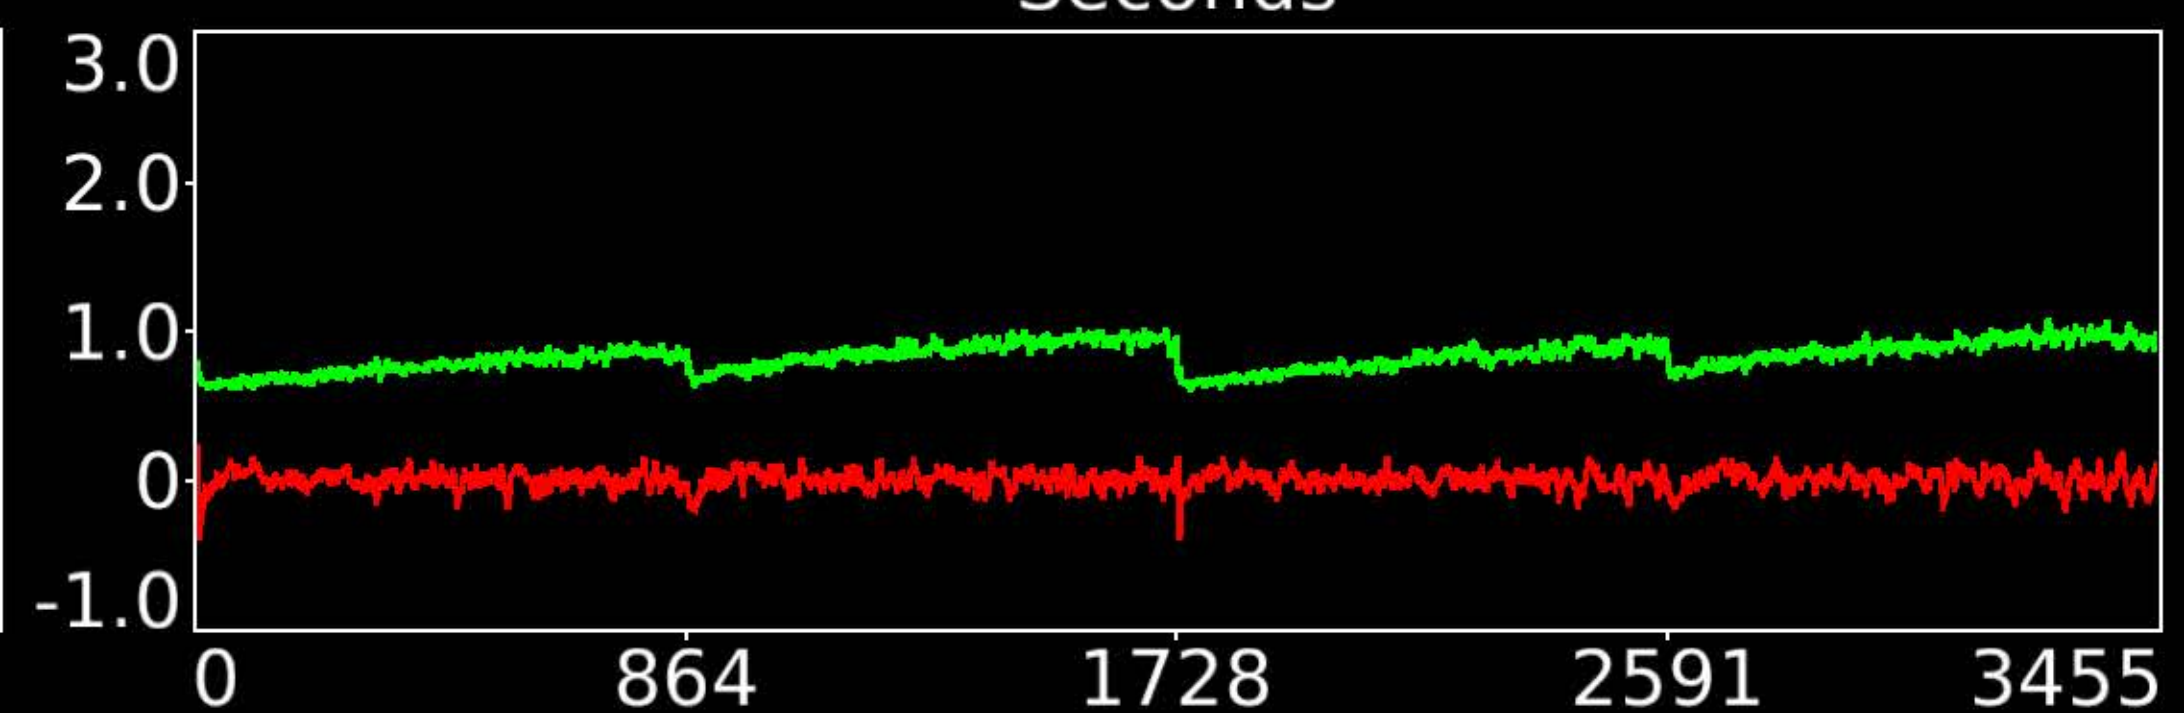

|                           |                            |                                 |  |
|---------------------------|----------------------------|---------------------------------|--|
| Number & Class: 29 Signal |                            | Name: Peripheral > Foveal + MT+ |  |
| RVT Correlated: No        | DVARS Dip Associated: No   | Cross-Subject Variable: Yes     |  |
| Single Subject: No        | % Variance Explained: 1.21 | Globality Index: 0.5            |  |
| Task Component: No        | Taskr Component: No        | Sleep Noted: Yes                |  |

Rationale: Spatial map includes positive and negative patches that respect known retinotopic visual organization (Peripheral vs Foveal)



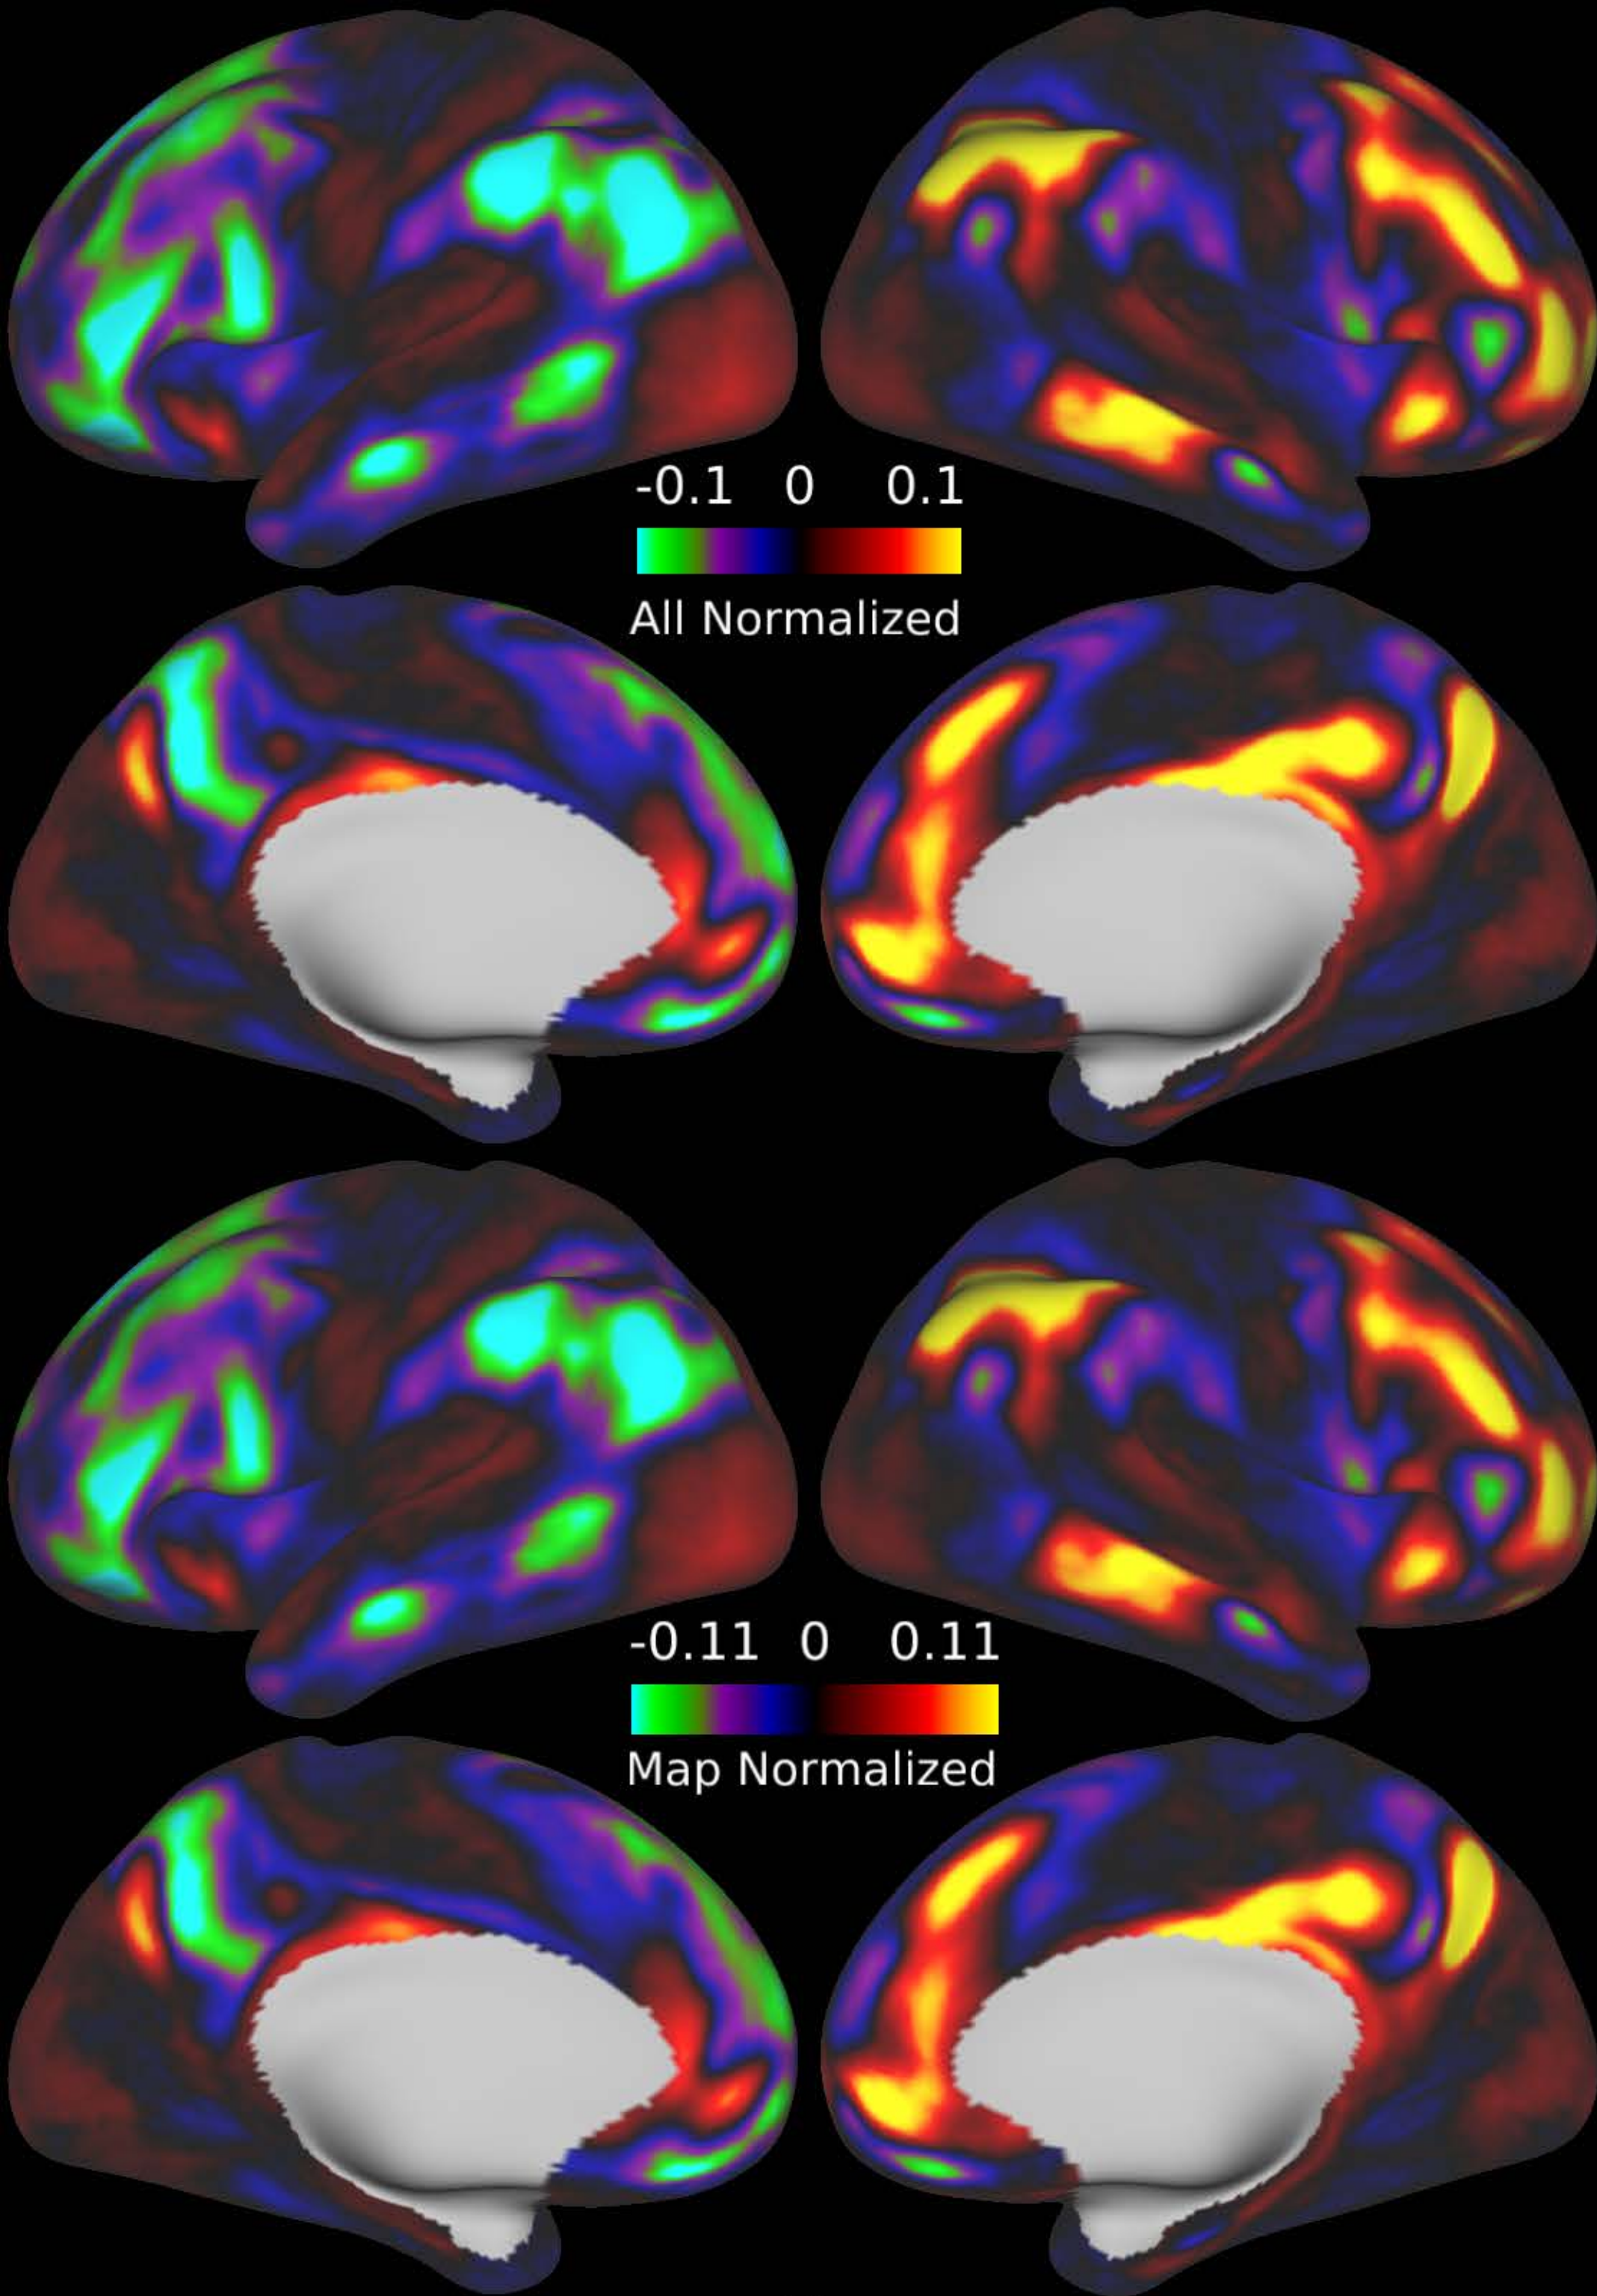

Hertz

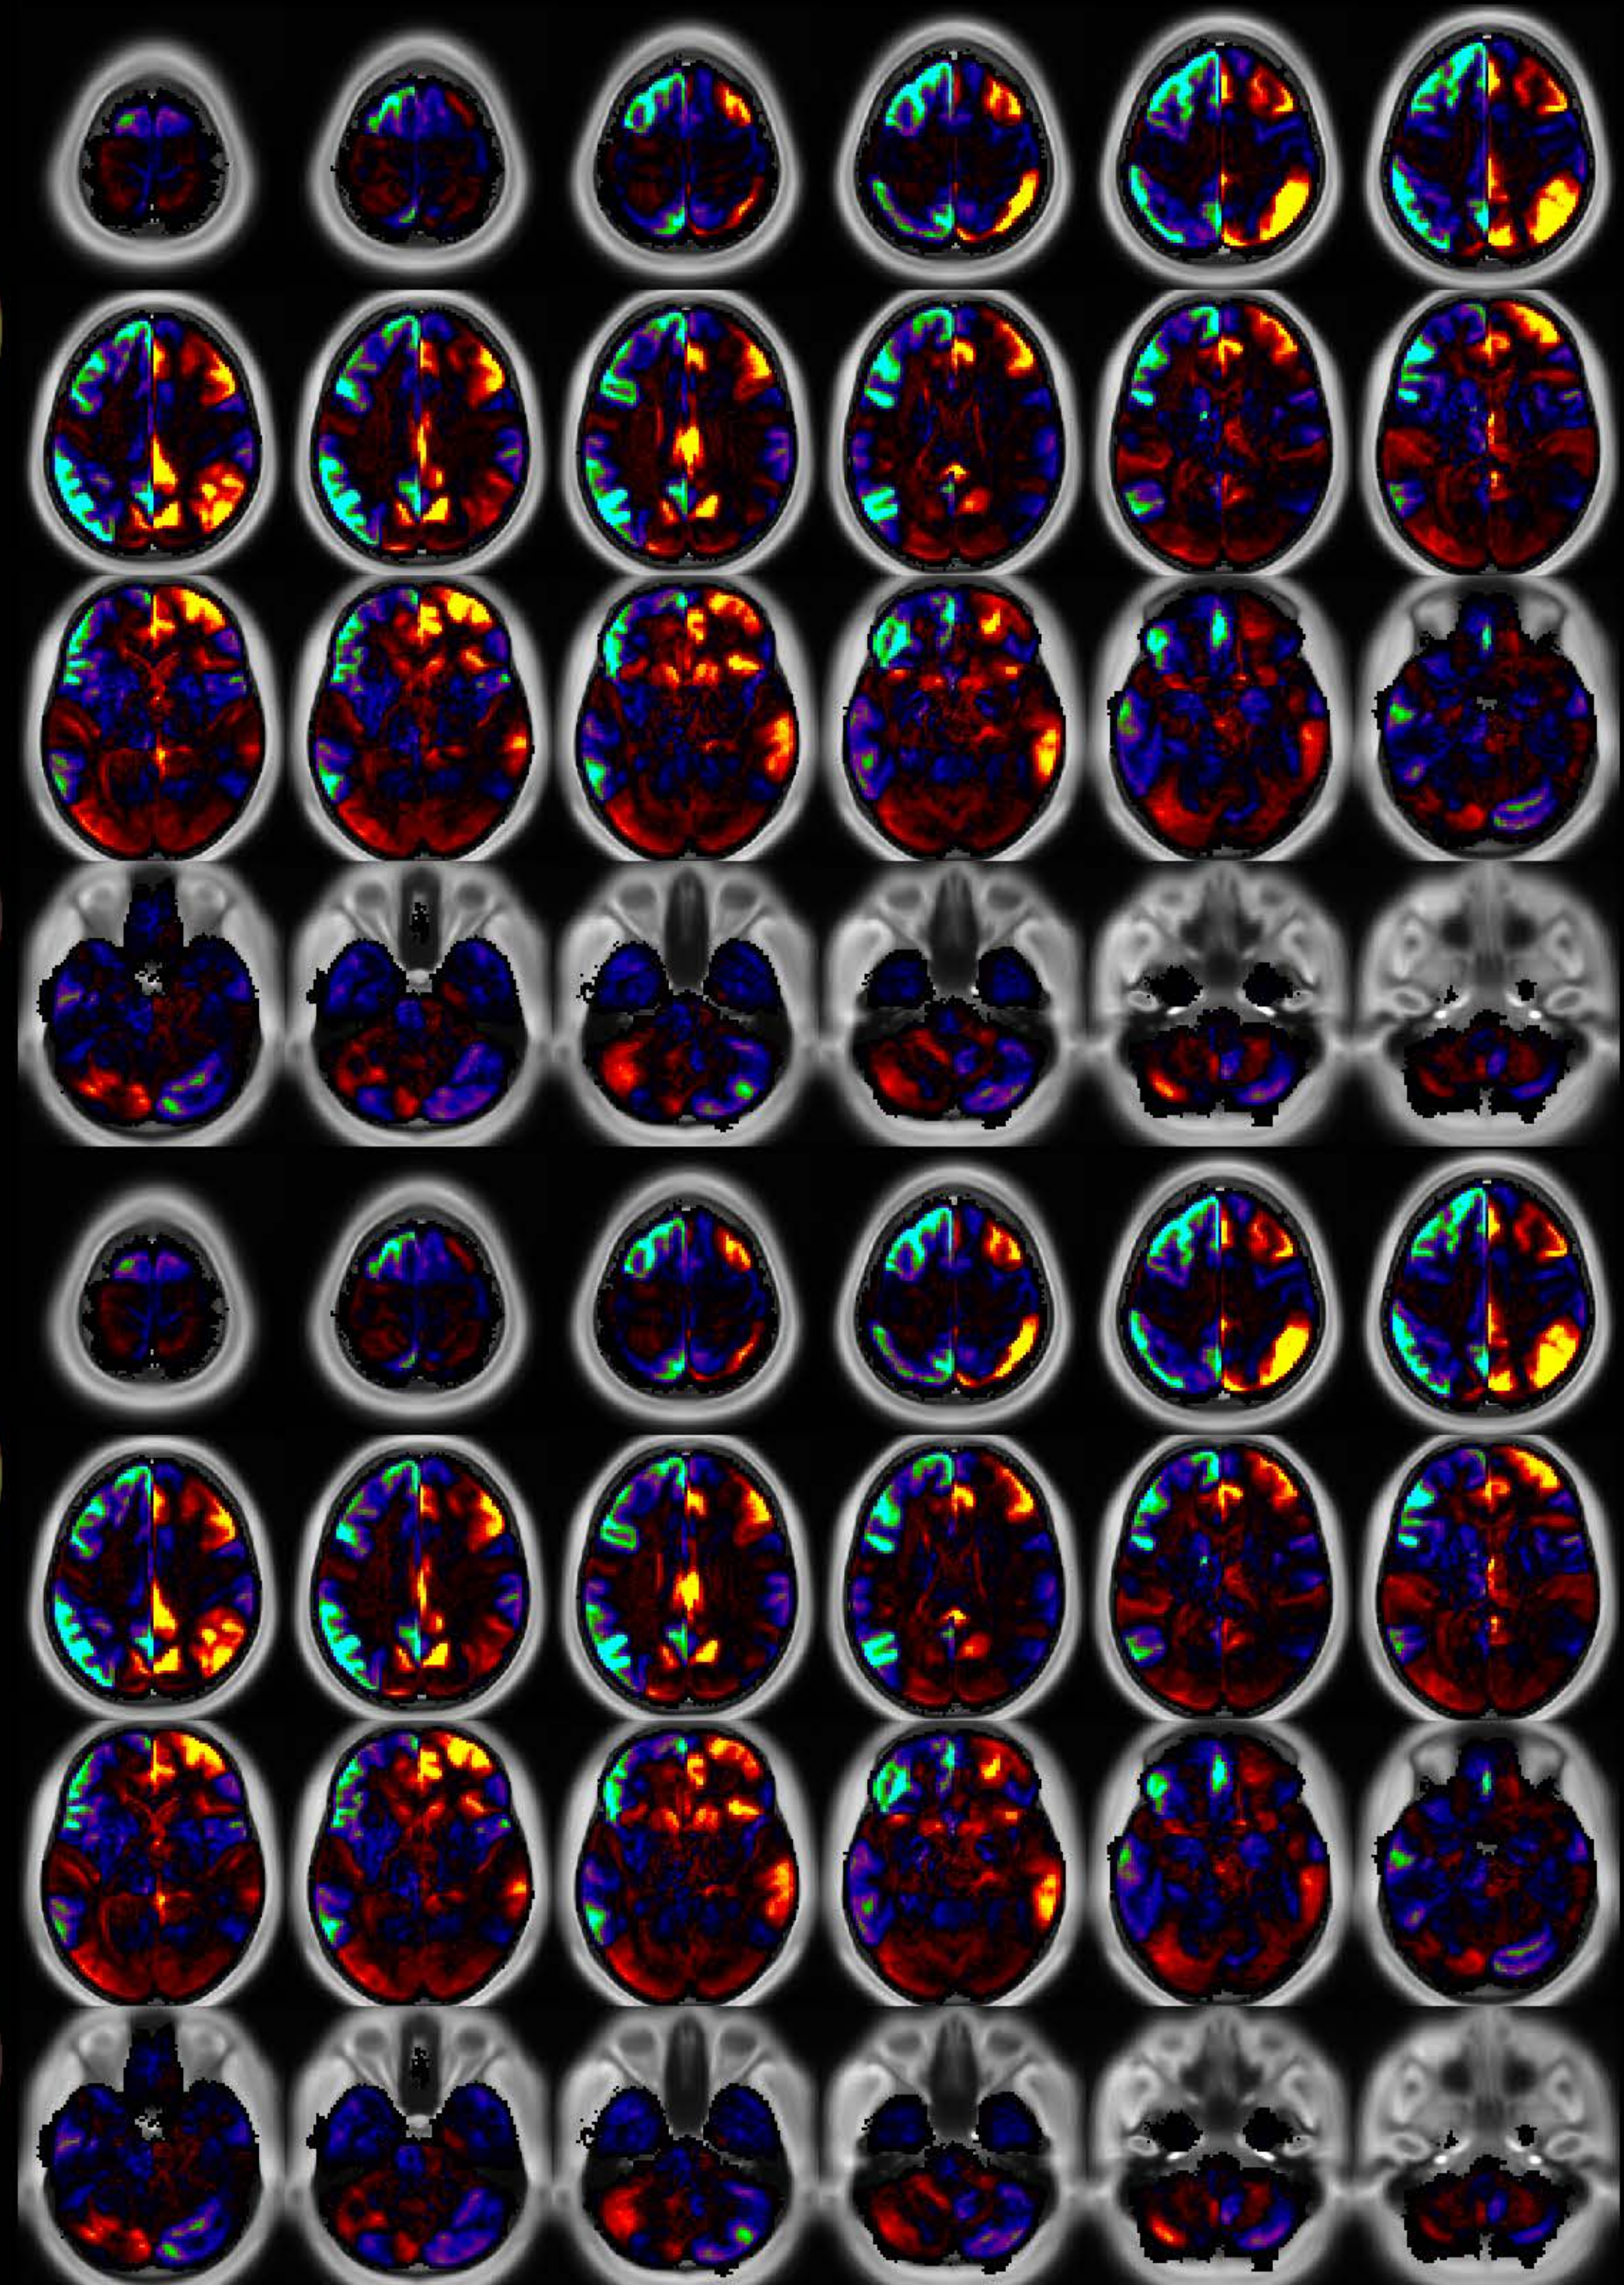

Seconds

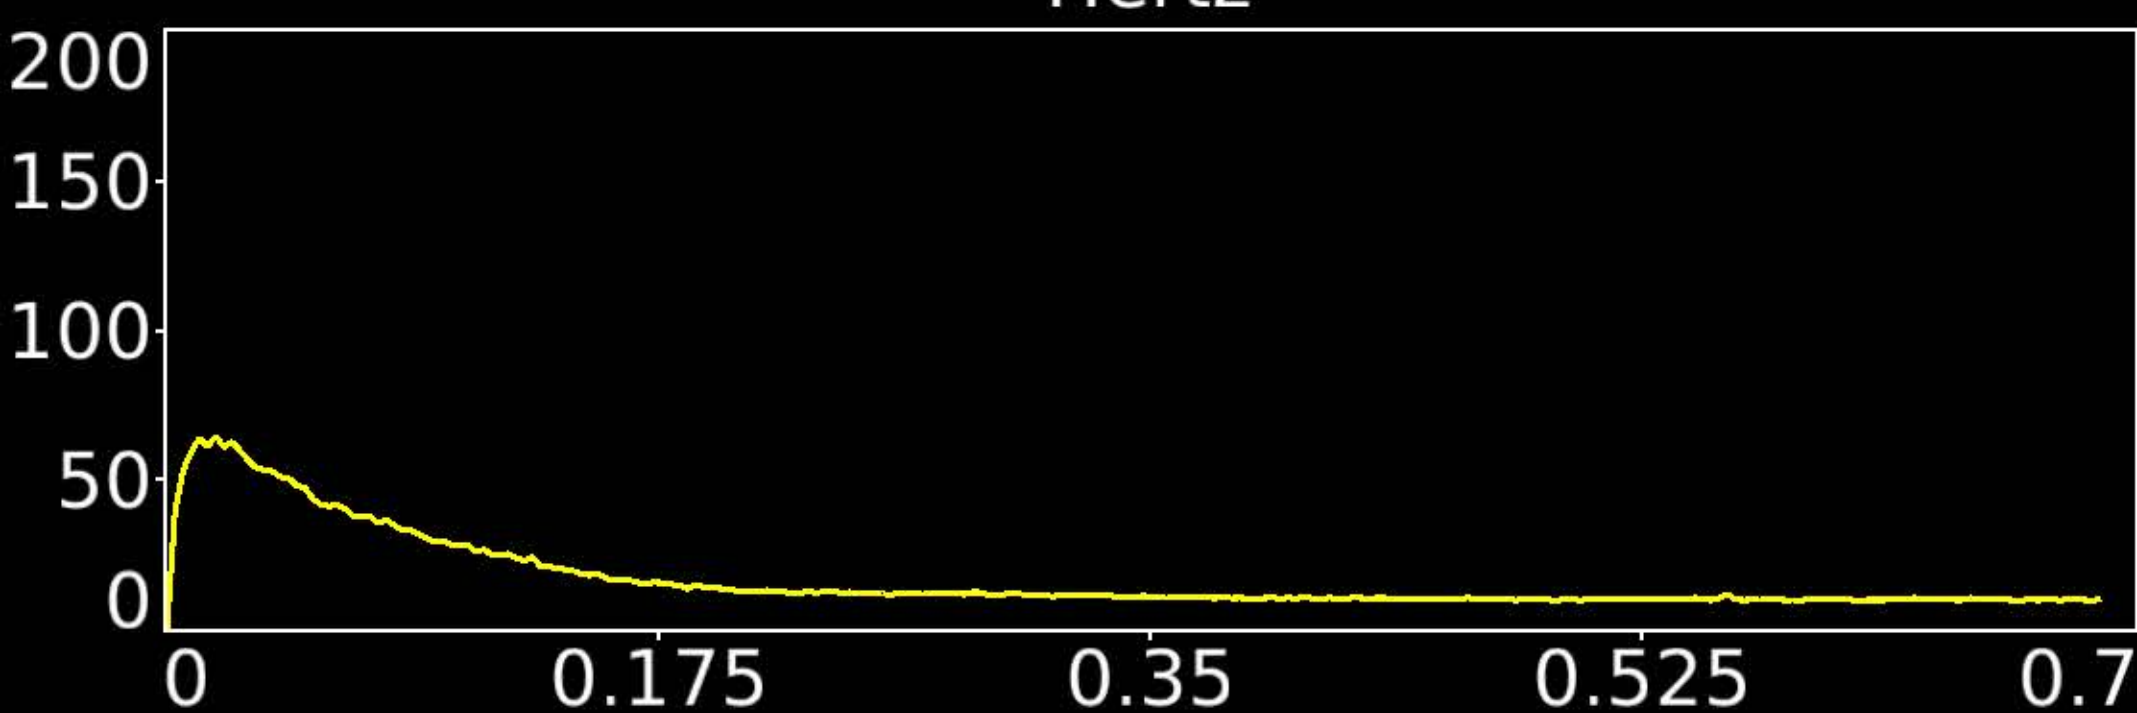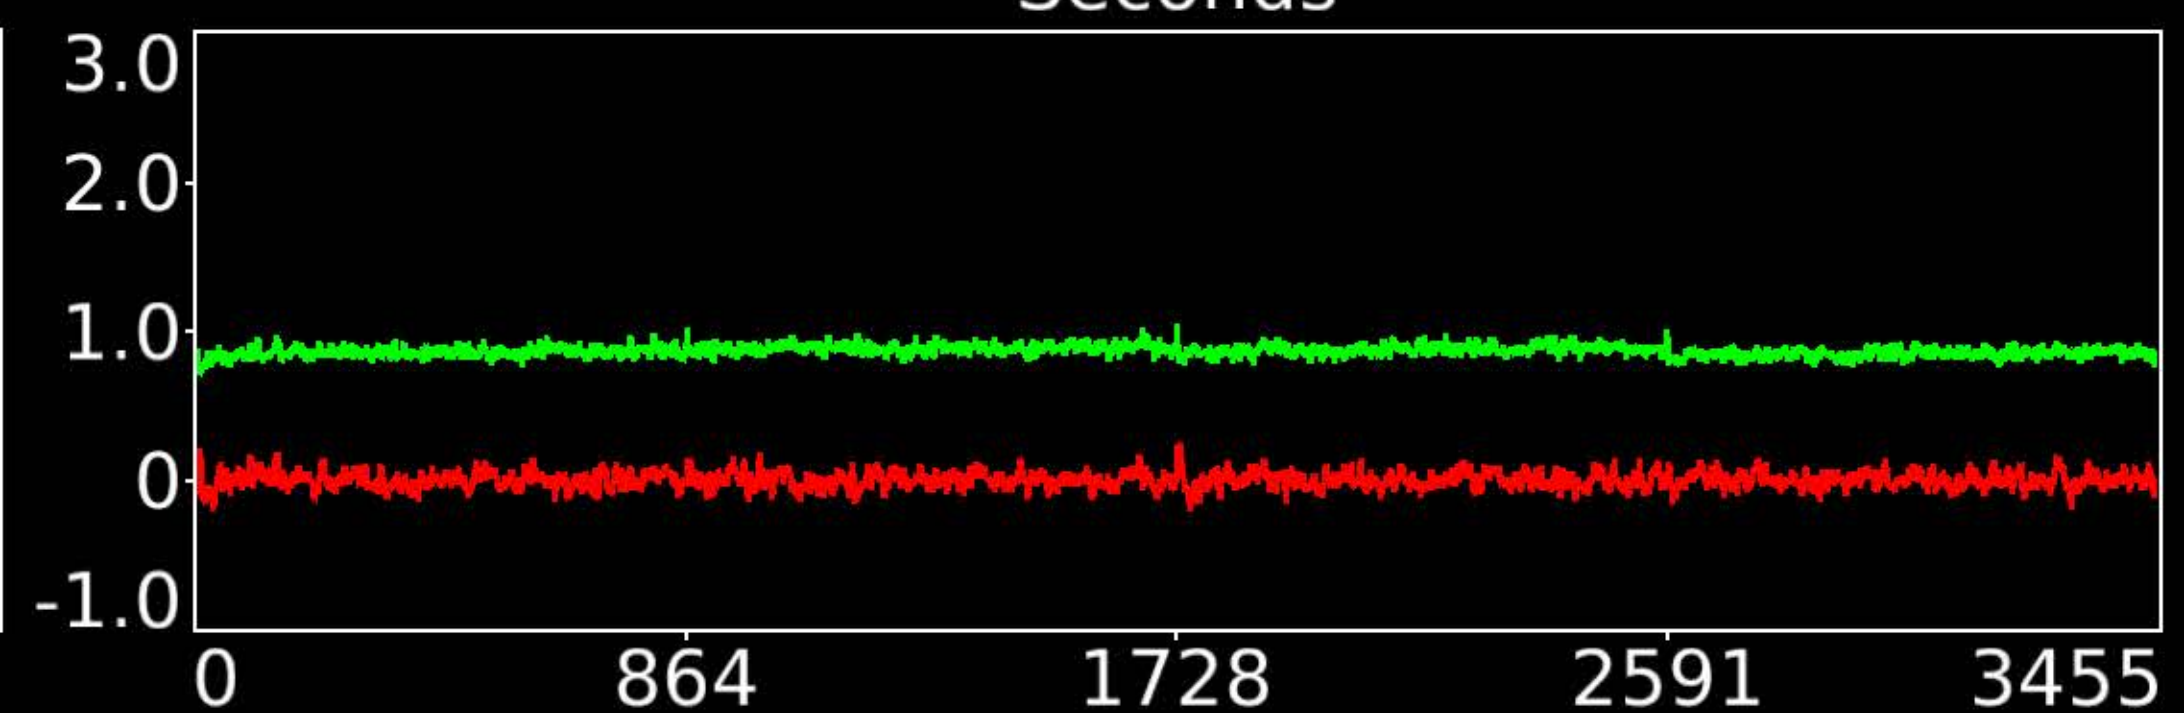

|                           |                            |                                          |  |
|---------------------------|----------------------------|------------------------------------------|--|
| Number & Class: 30 Signal |                            | Name: R Fronto-Parietal > L Default Mode |  |
| RVT Correlated: No        | DVARS Dip Associated: No   | Cross-Subject Variable: No               |  |
| Single Subject: No        | % Variance Explained: 1.16 | Globality Index: 0.16                    |  |
| Task Component: No        | Taskr Component: No        | Sleep Noted: No                          |  |

Rationale: Spatial map includes positive and negative patches that respect known areal boundaries (e.g. POS2 and RSC)



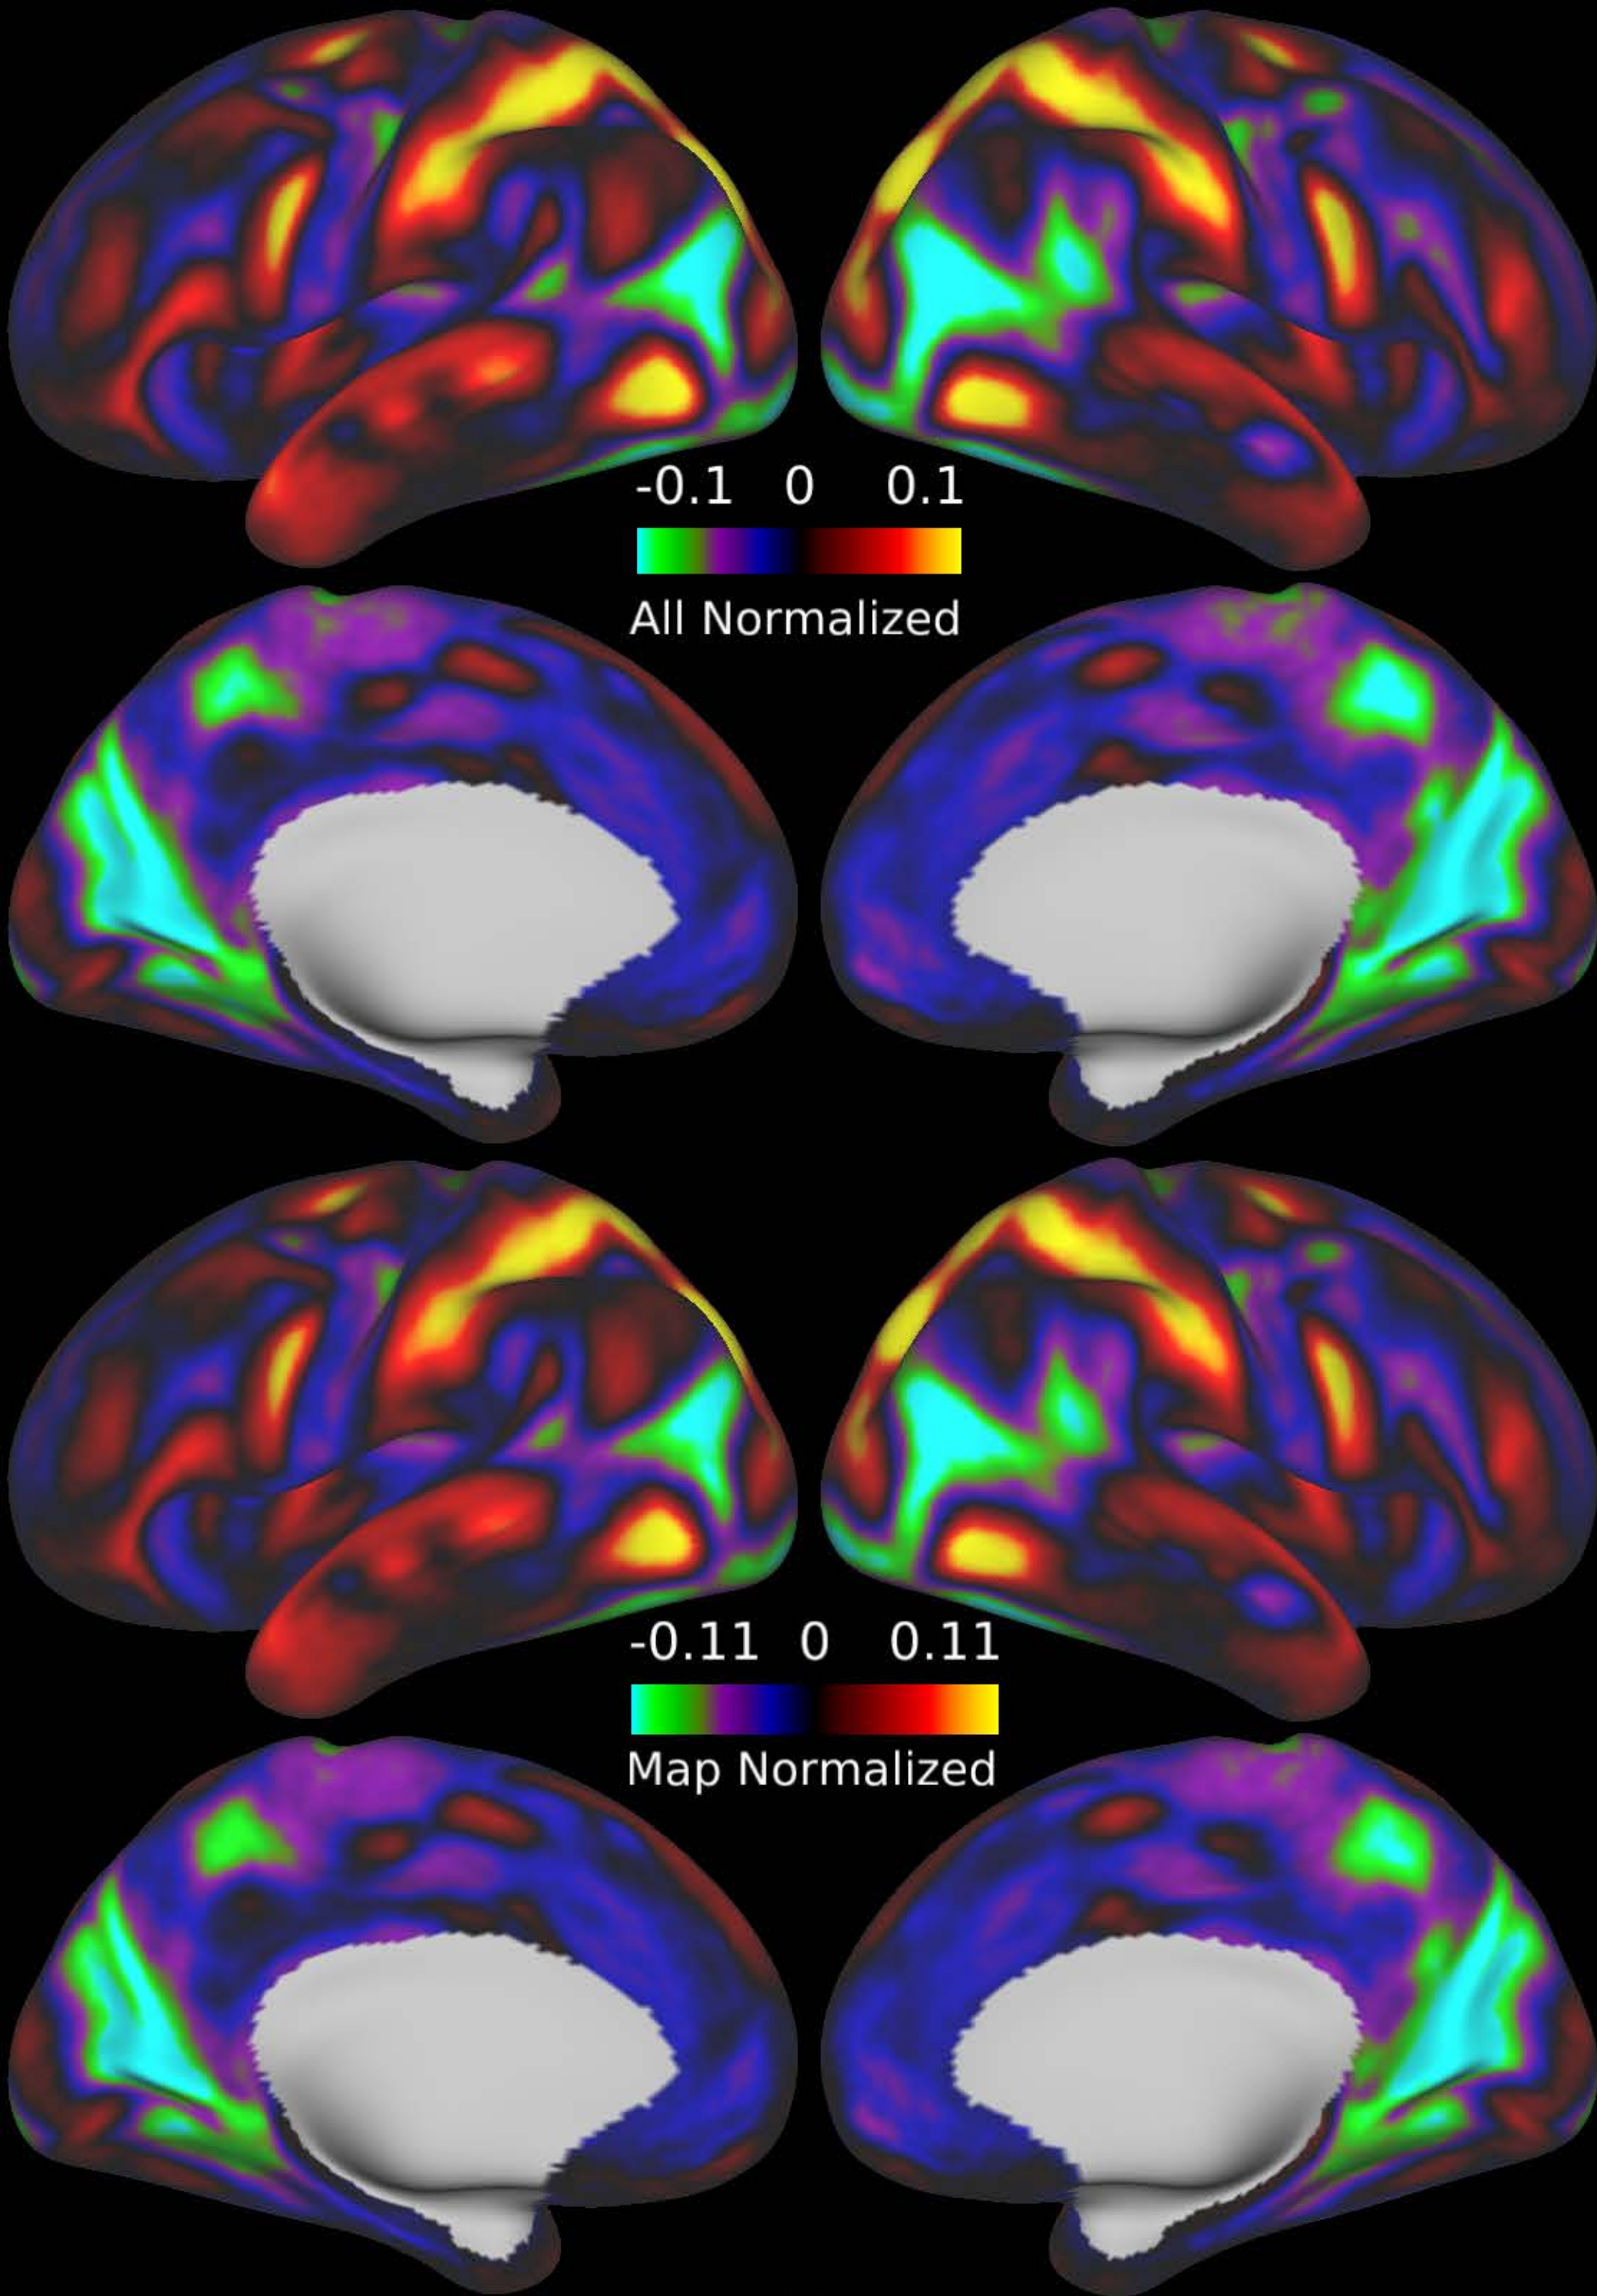

Hertz

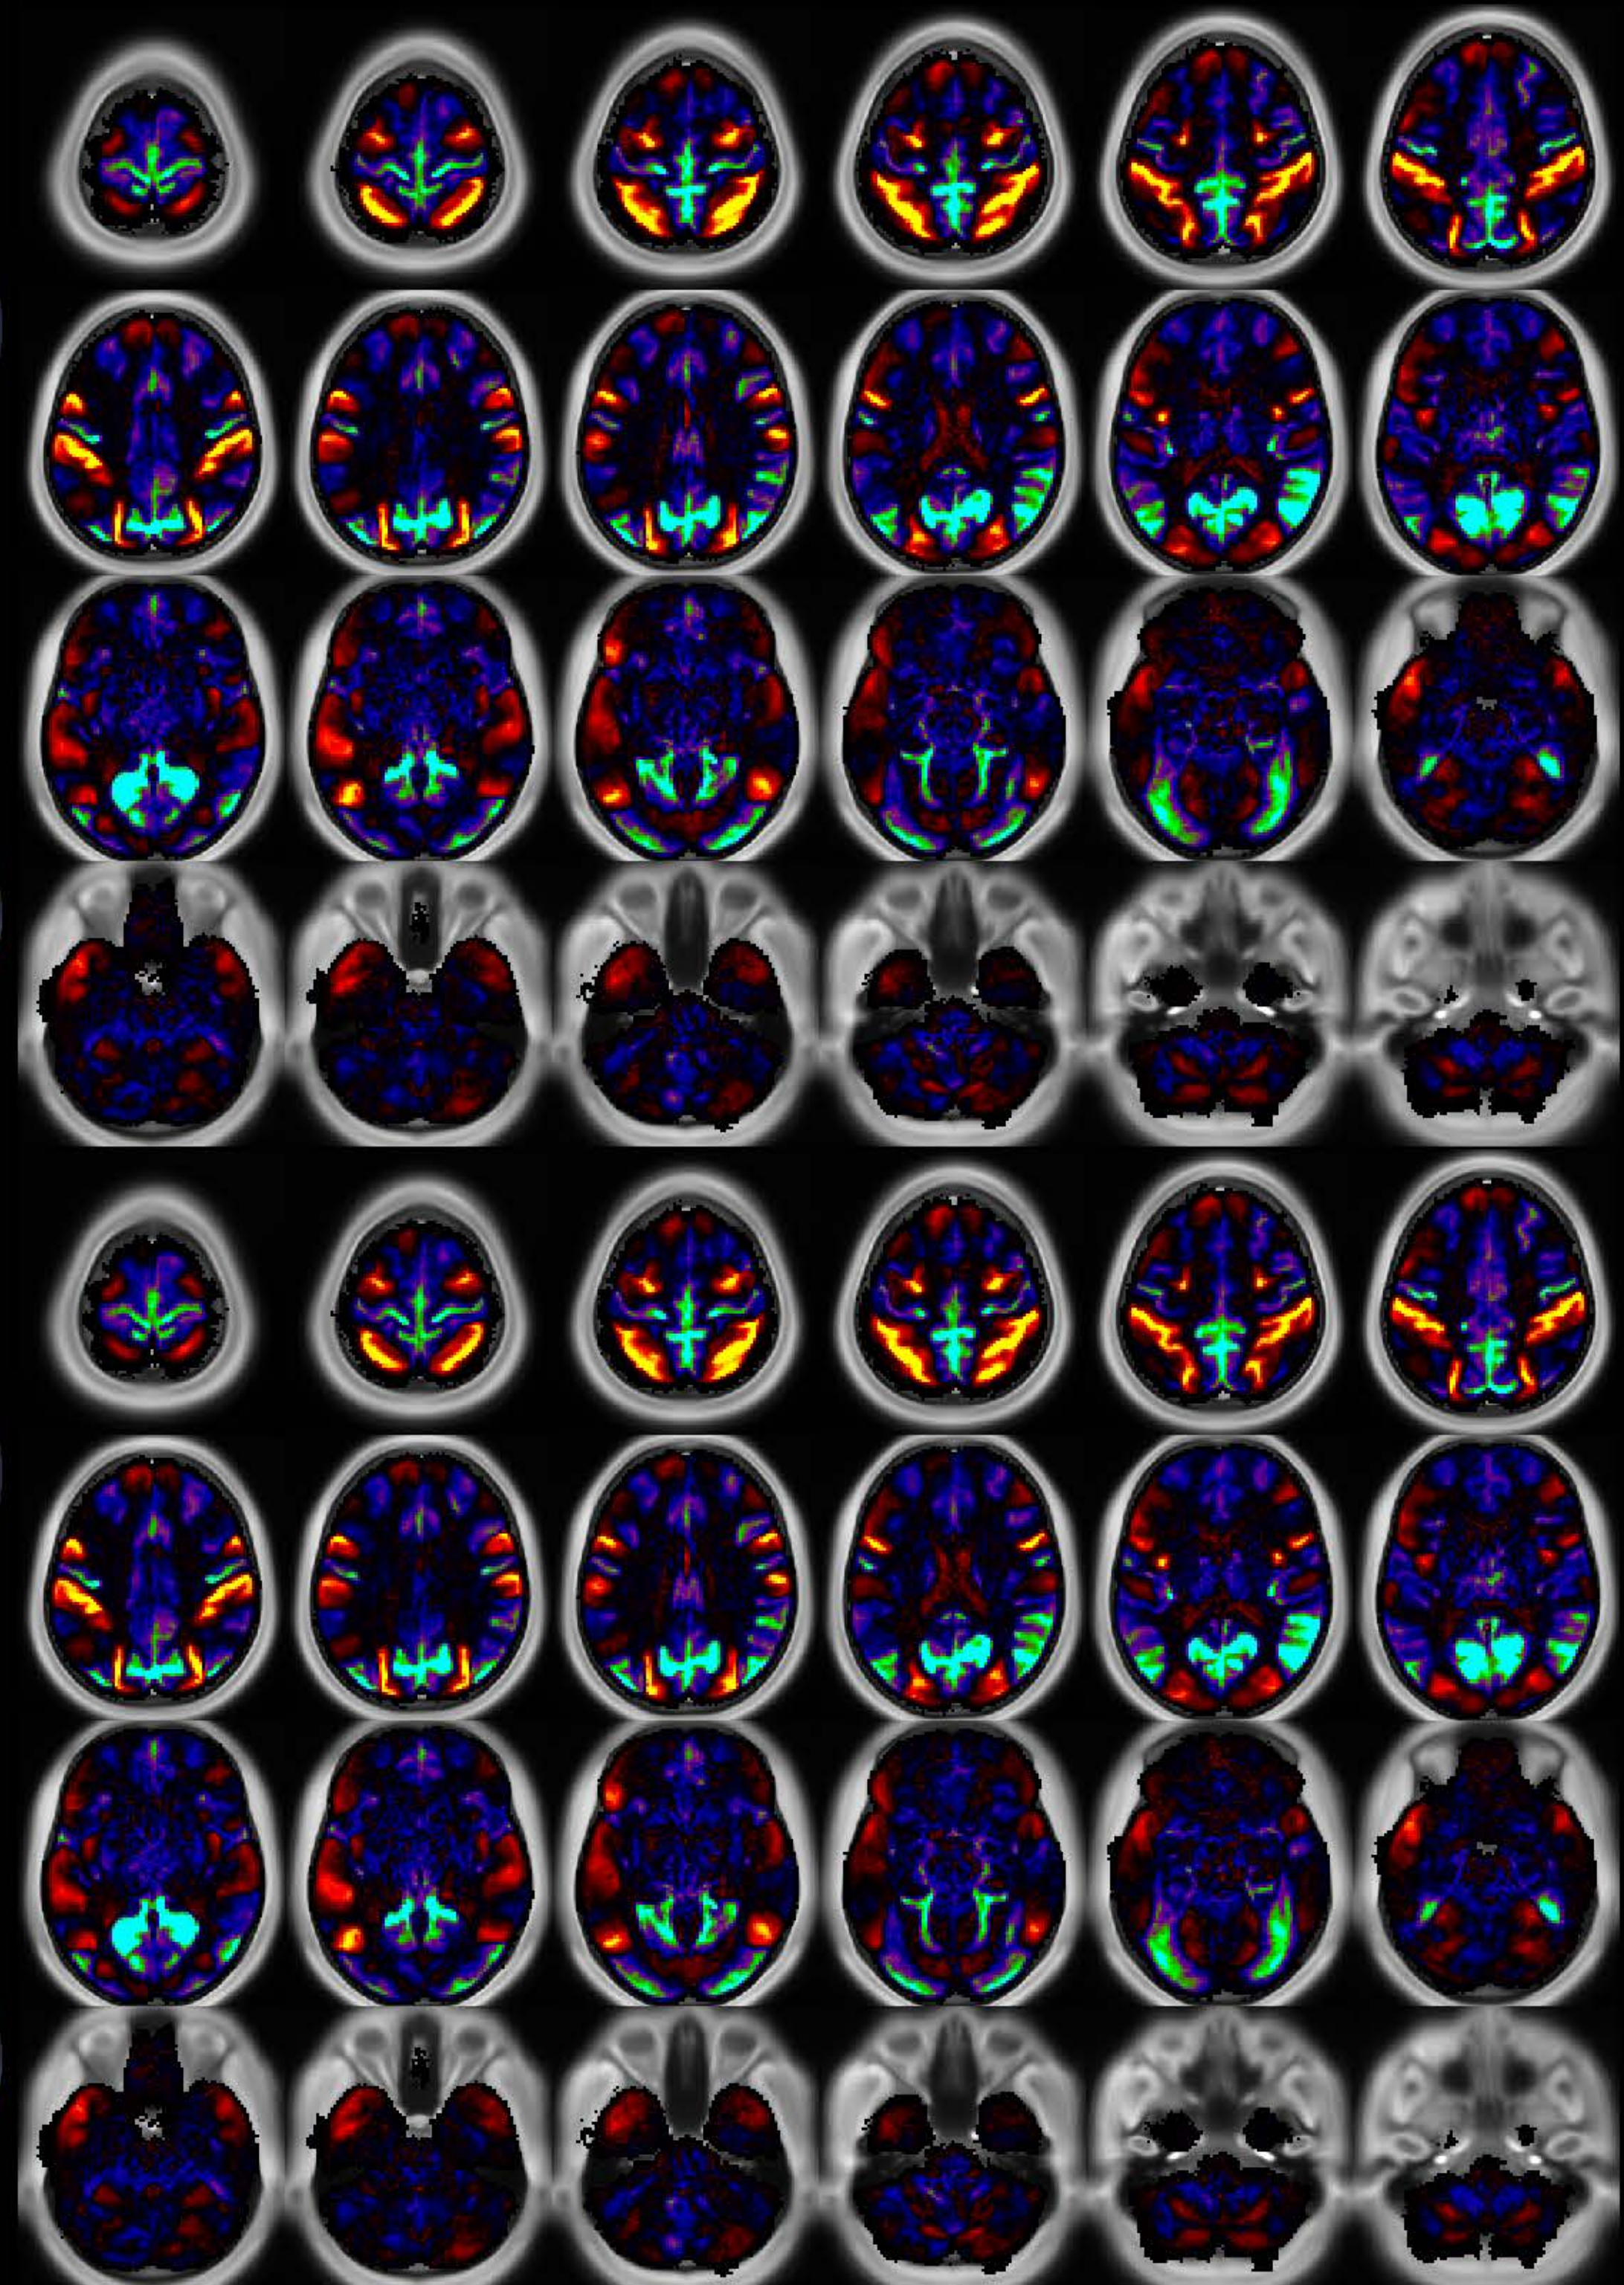

Seconds

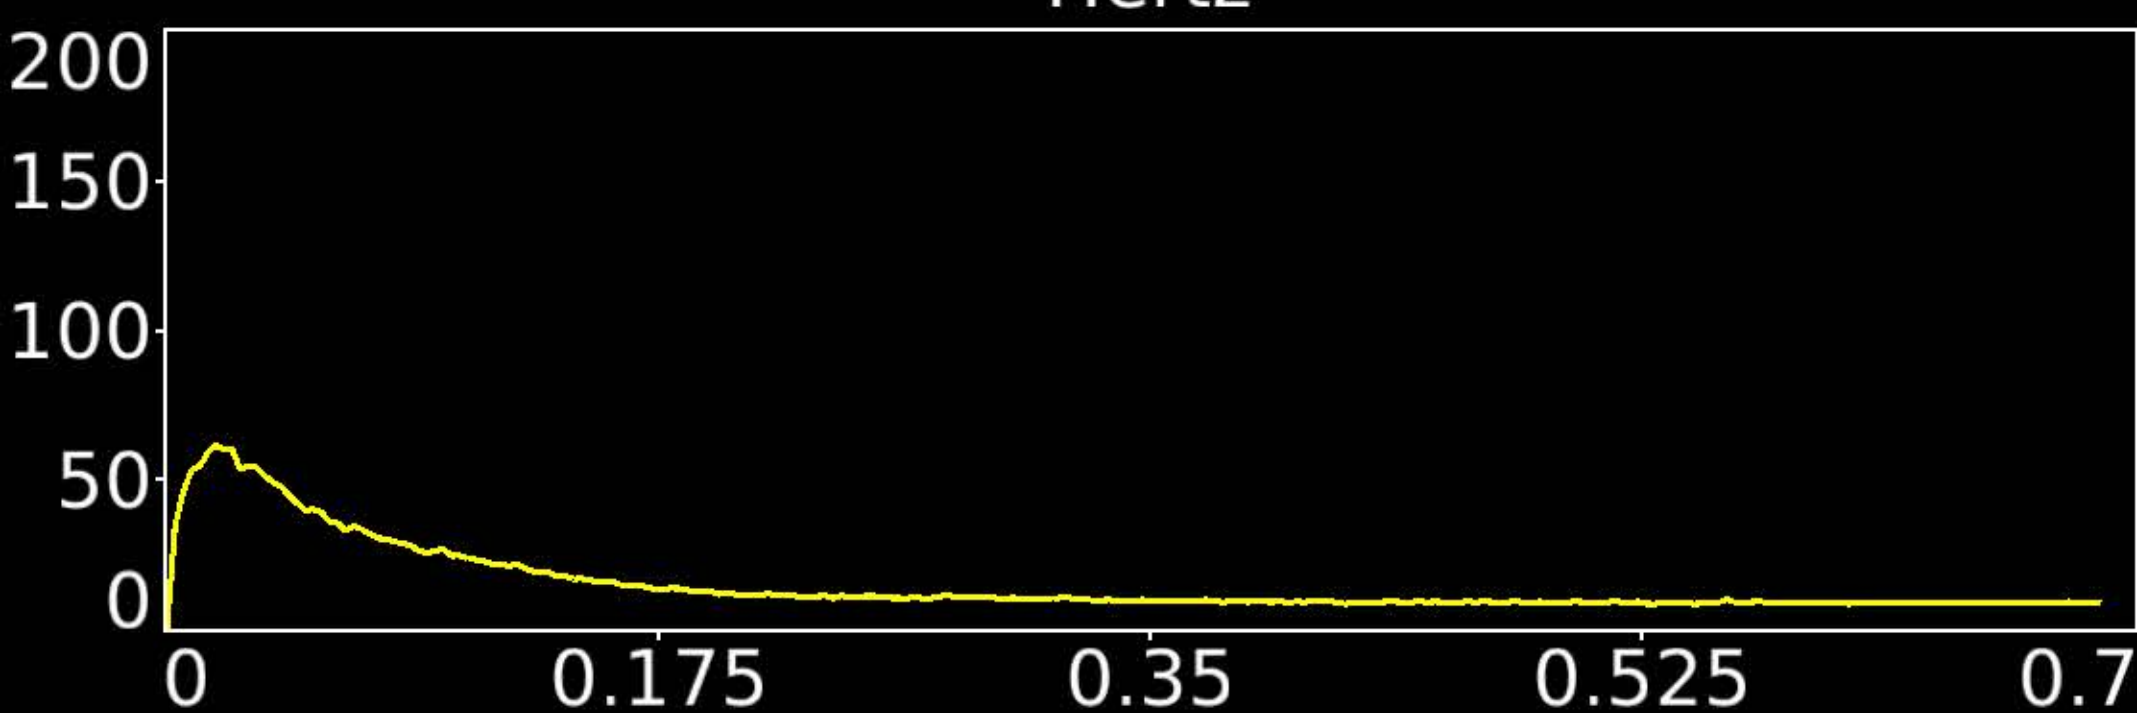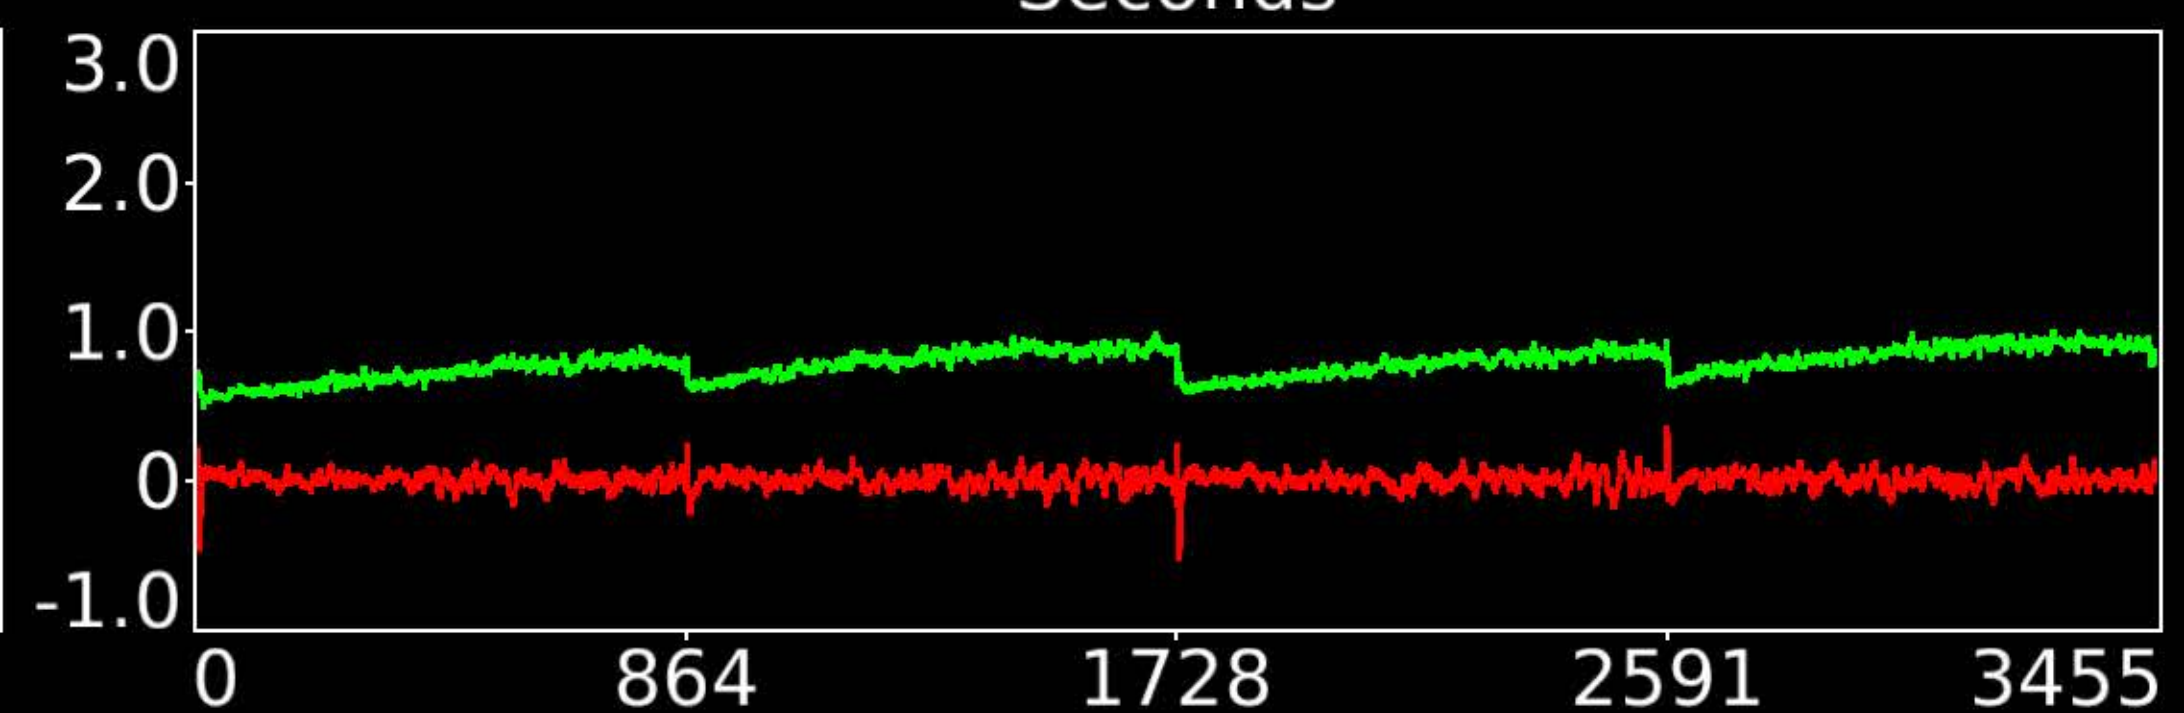

|                                                                                                                       |                           |                                   |  |
|-----------------------------------------------------------------------------------------------------------------------|---------------------------|-----------------------------------|--|
| Number & Class: 31 Signal                                                                                             |                           | Name: Dorsal Stream vs Peripheral |  |
| RVT Correlated: No                                                                                                    | DVARS Dip Associated: No  | Cross-Subject Variable: Yes       |  |
| Single Subject: No                                                                                                    | % Variance Explained: 1.1 | Globality Index: 0.87             |  |
| Task Component: No                                                                                                    | Taskr Component: No       | Sleep Noted: Yes                  |  |
| Rationale: Spatial map includes positive and negative patches that respect known RSNs (e.g. Dorsal Attention Network) |                           |                                   |  |



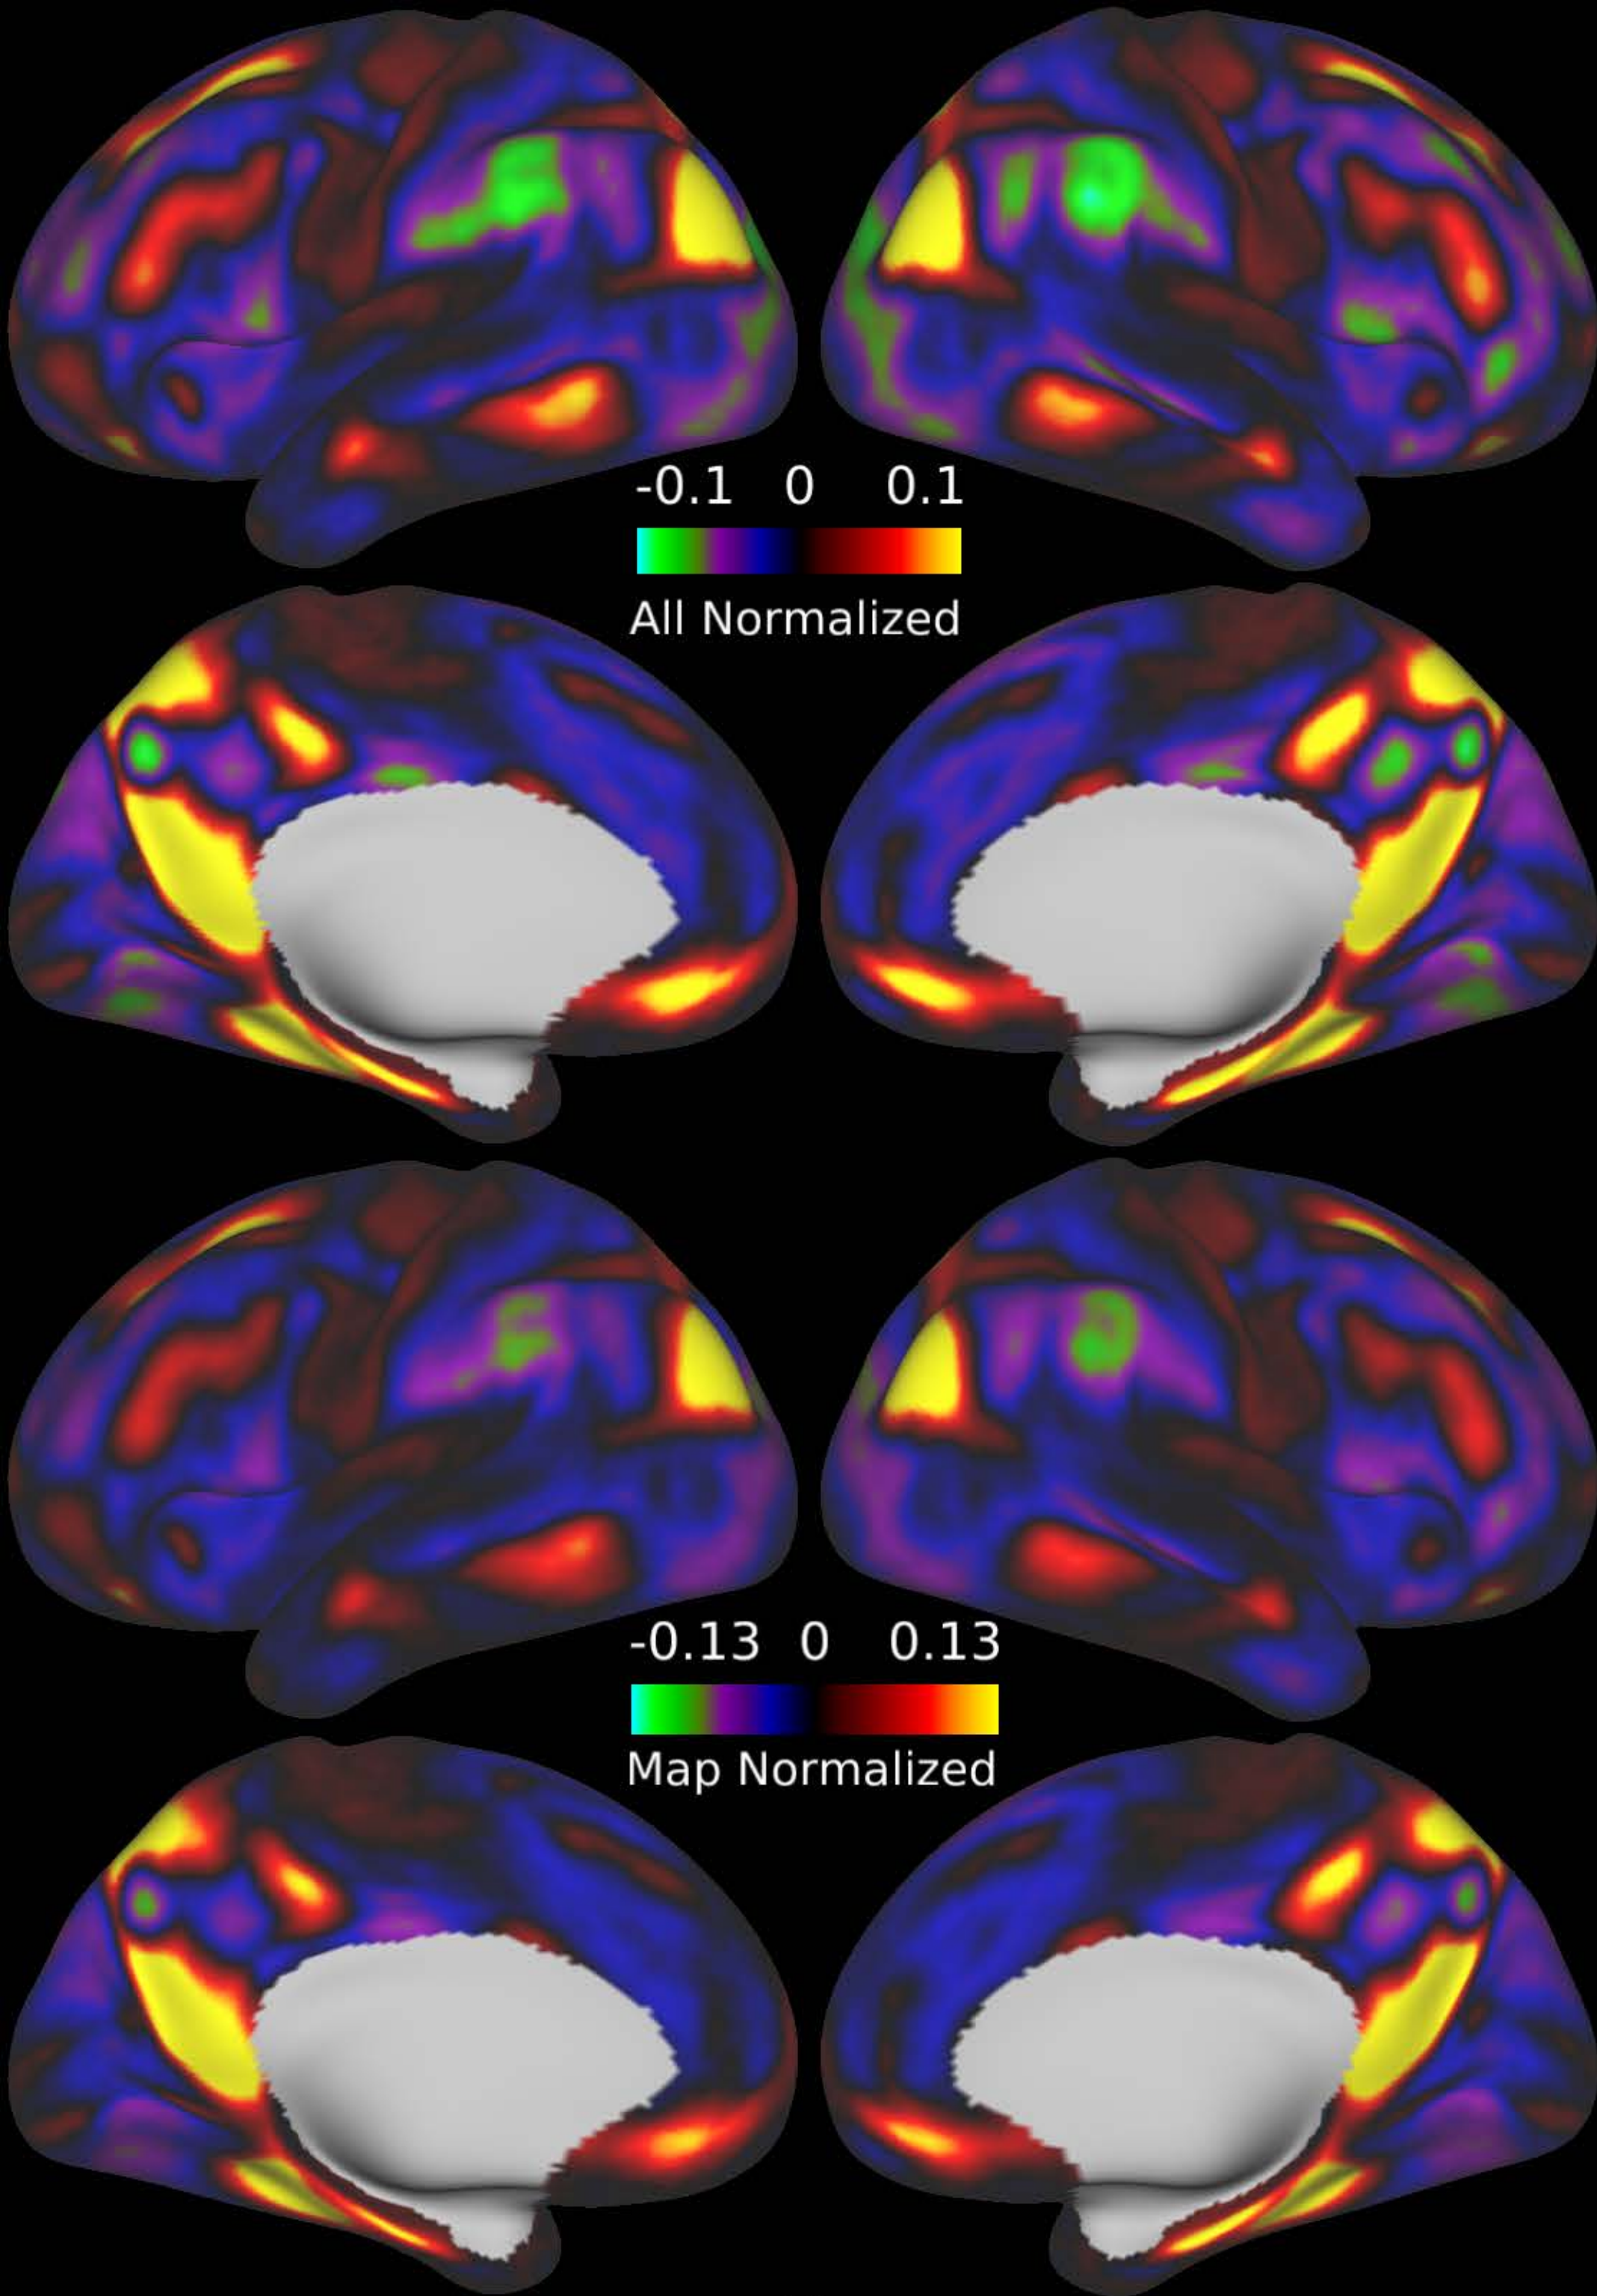

Hertz

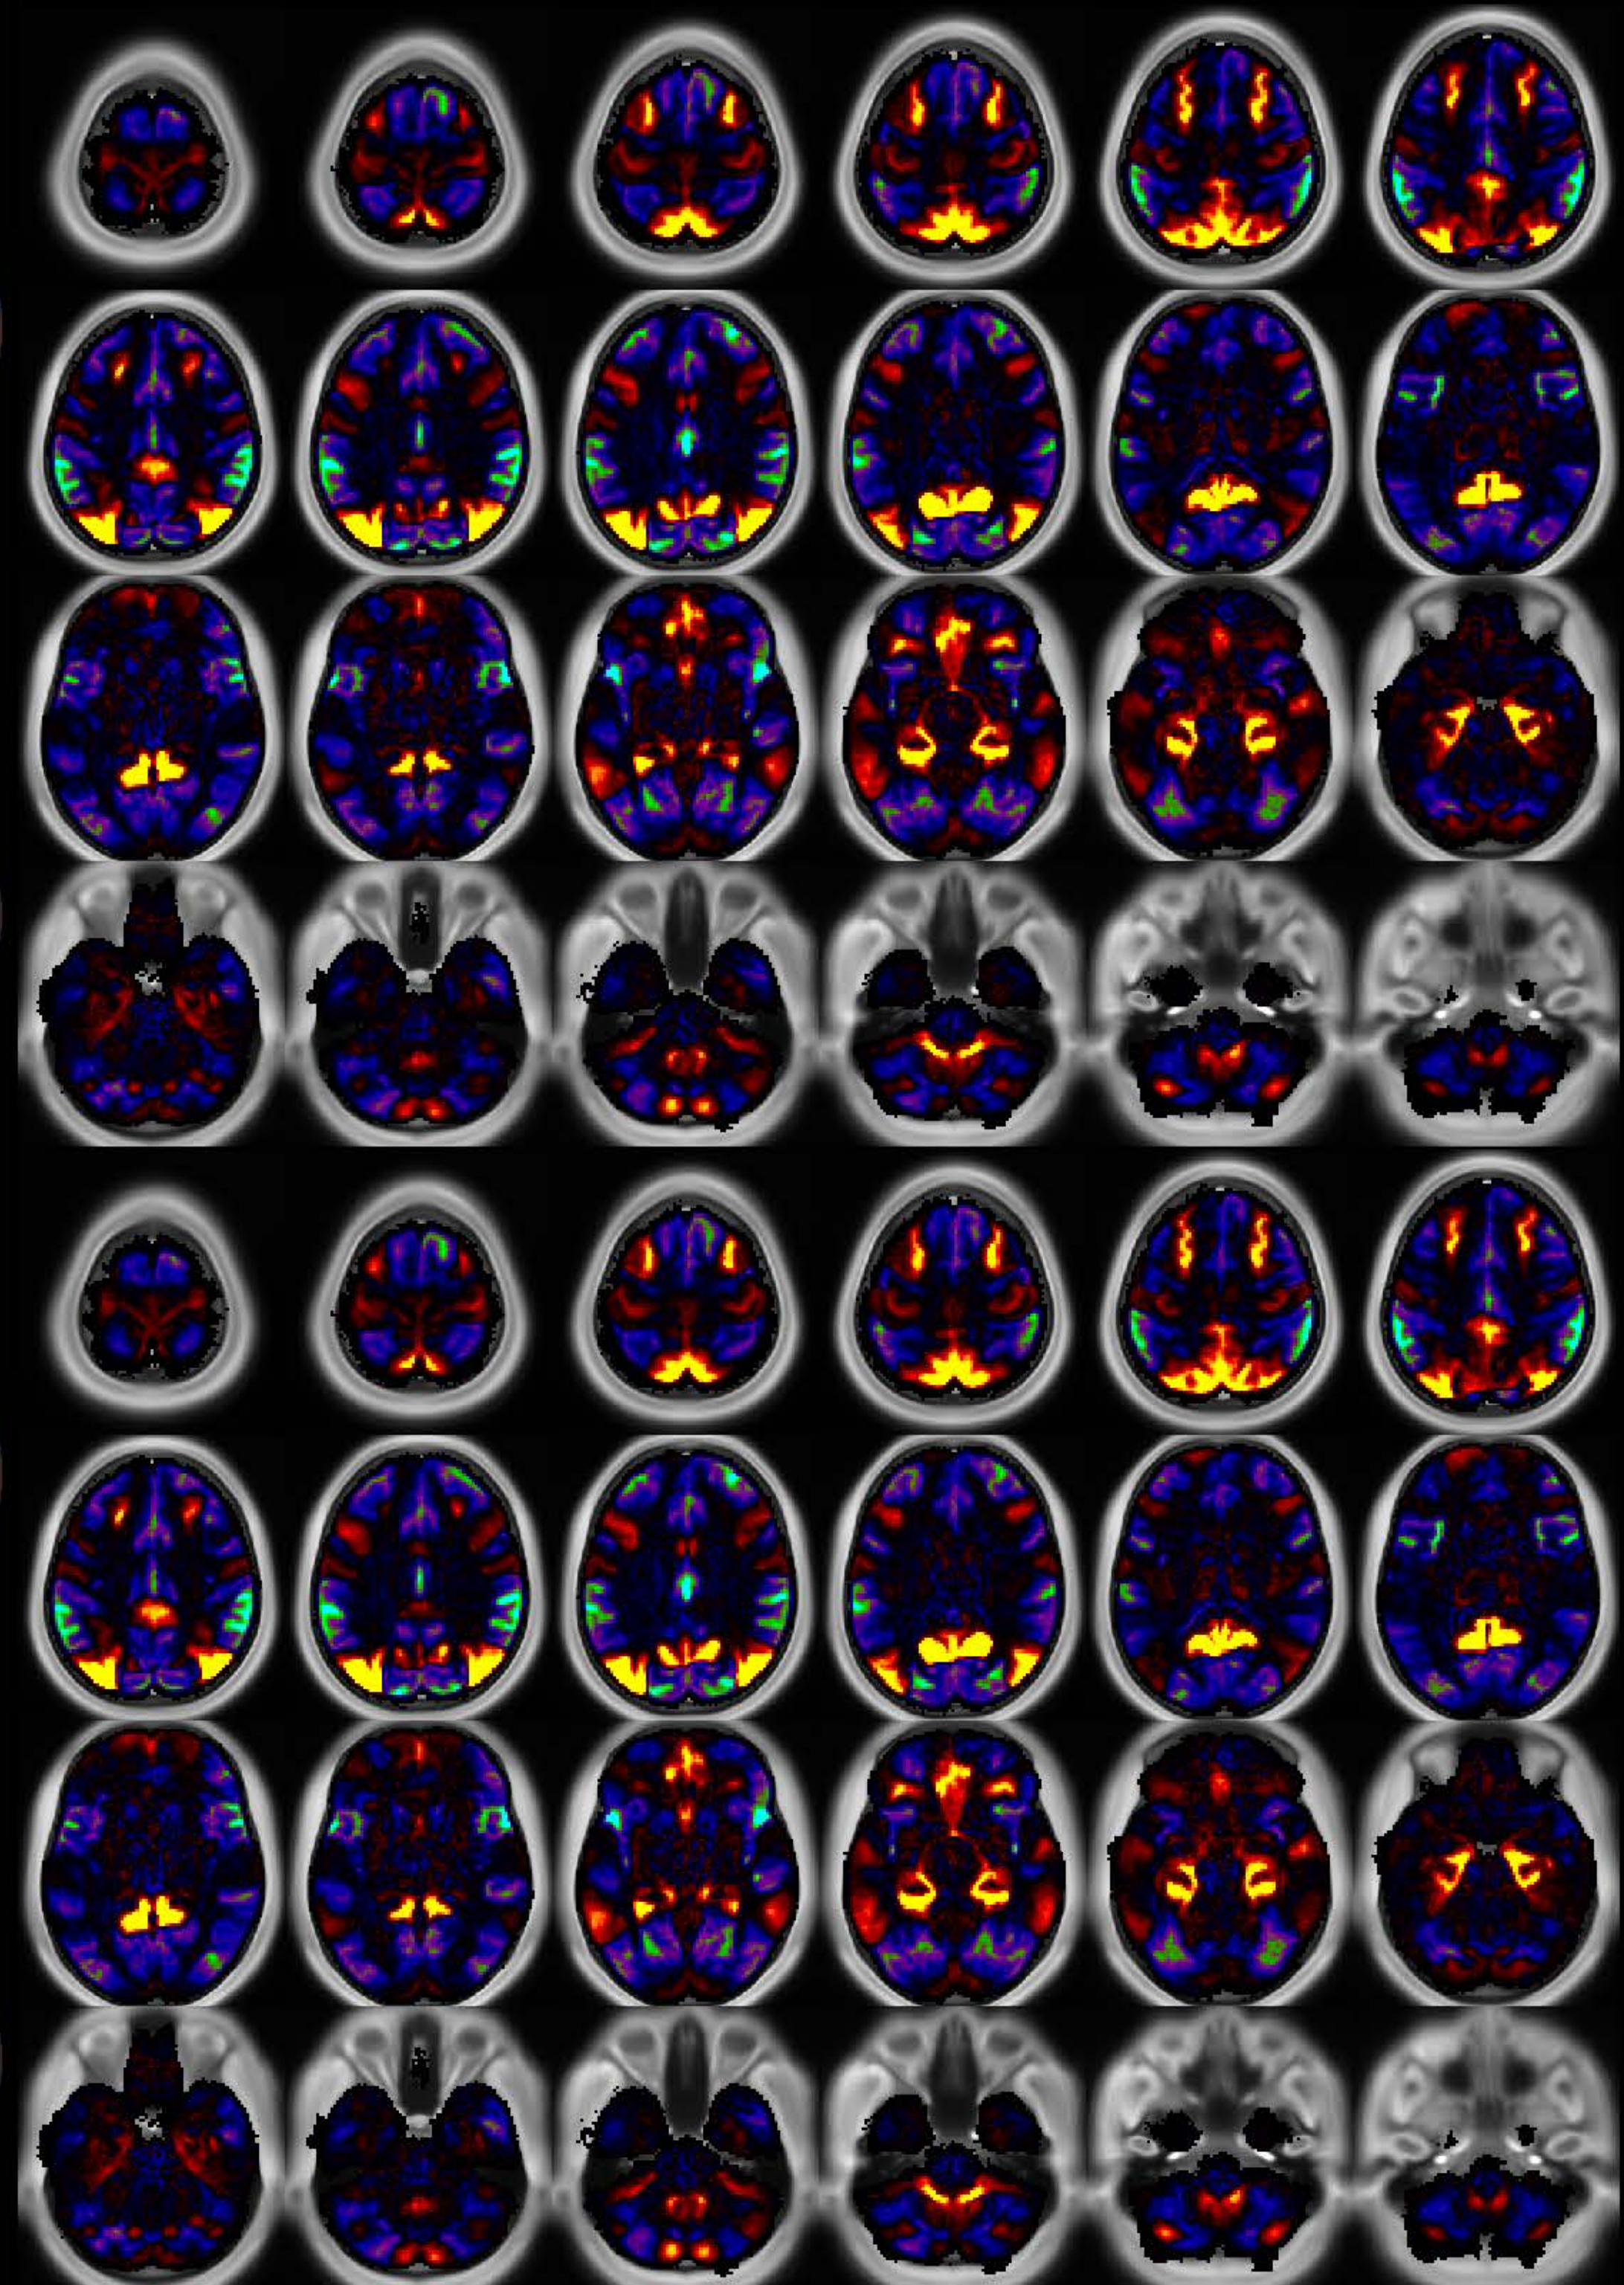

Seconds

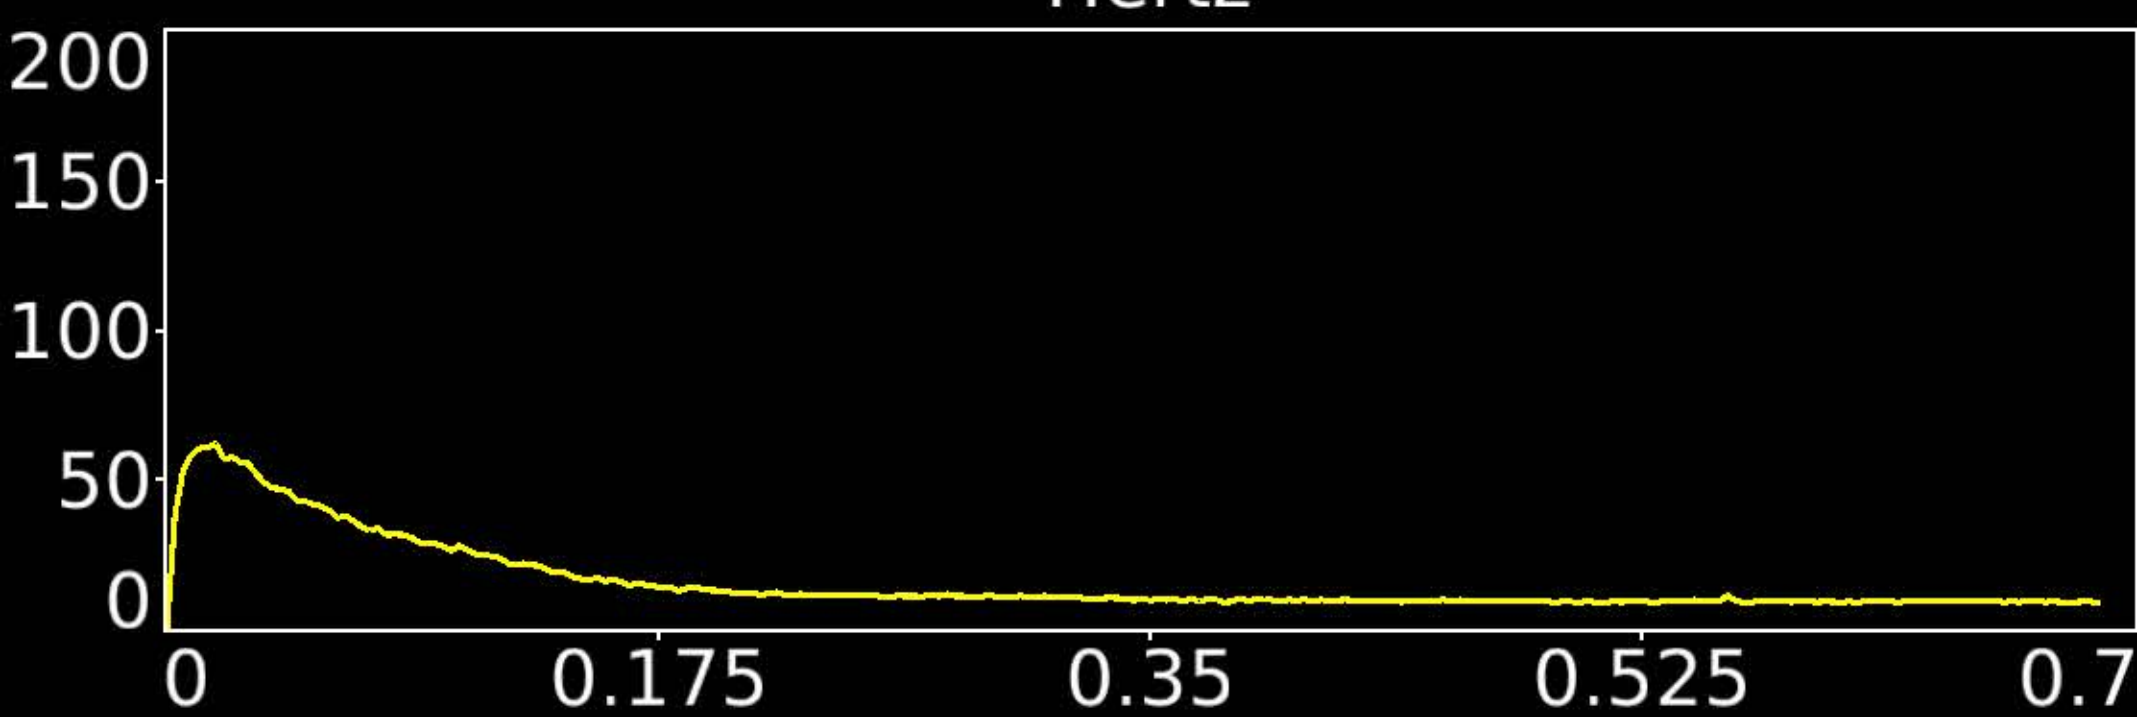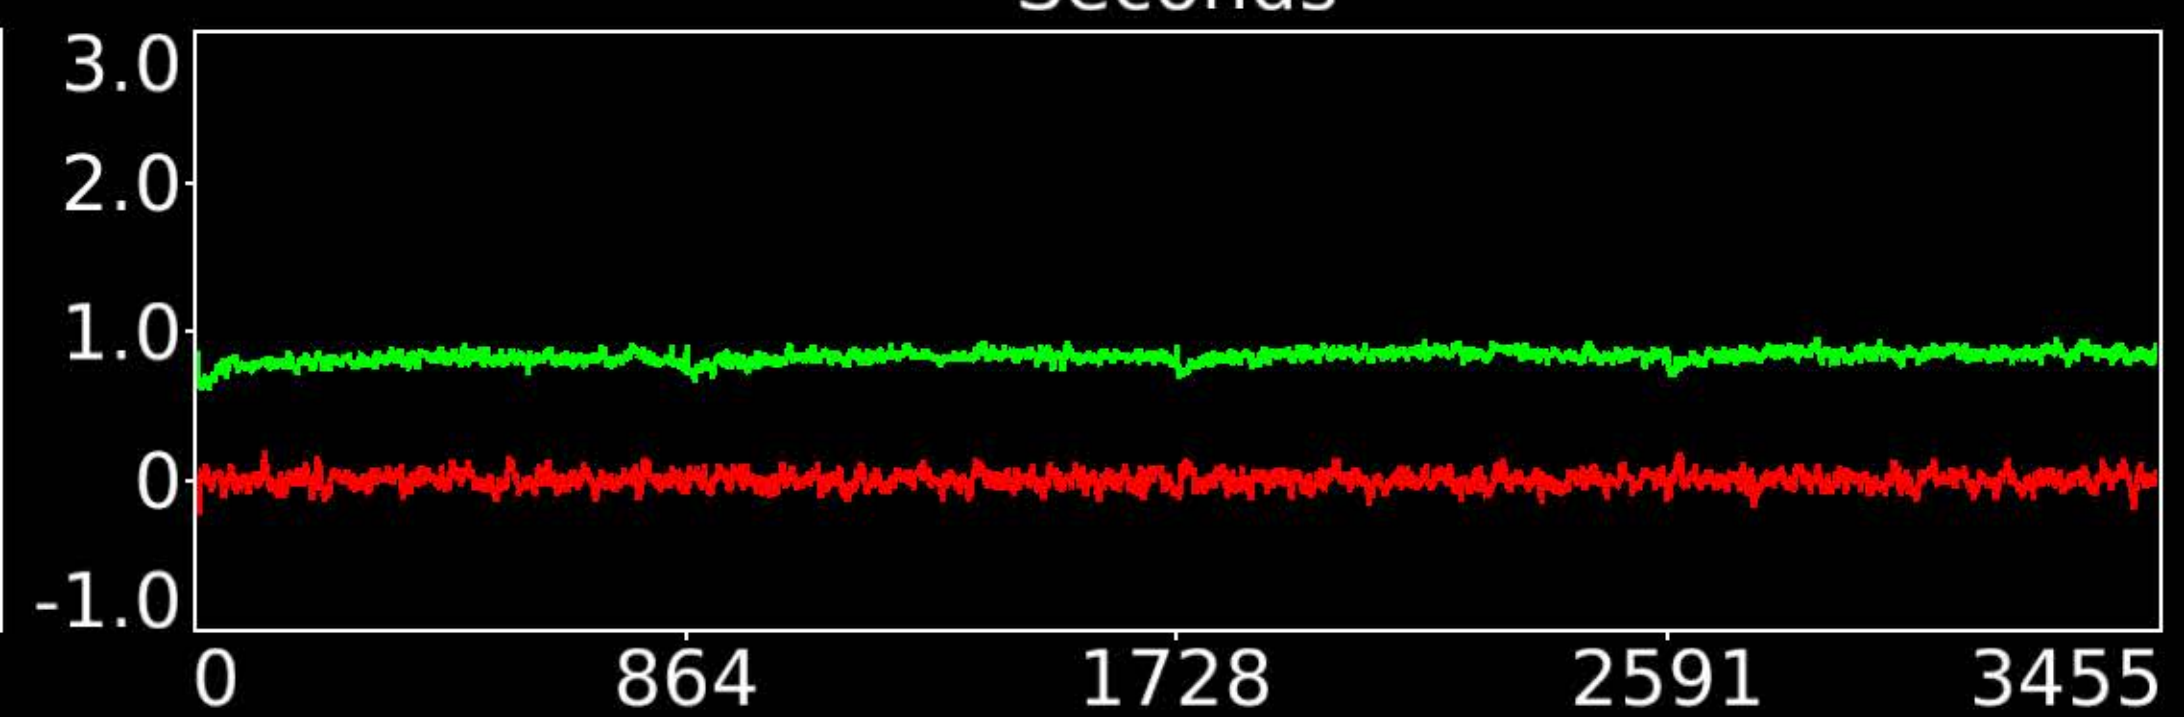

|                           |                           |                                  |  |
|---------------------------|---------------------------|----------------------------------|--|
| Number & Class: 32 Signal |                           | Name: Parietal Occipital Network |  |
| RVT Correlated: No        | DVARS Dip Associated: No  | Cross-Subject Variable: No       |  |
| Single Subject: No        | % Variance Explained: 1.1 | Globality Index: 0.55            |  |
| Task Component: No        | Taskr Component: 39       | Sleep Noted: No                  |  |

Rationale: Spatial map includes positive and negative patches that respect known RSNs (e.g. Parietal Occipital Network)



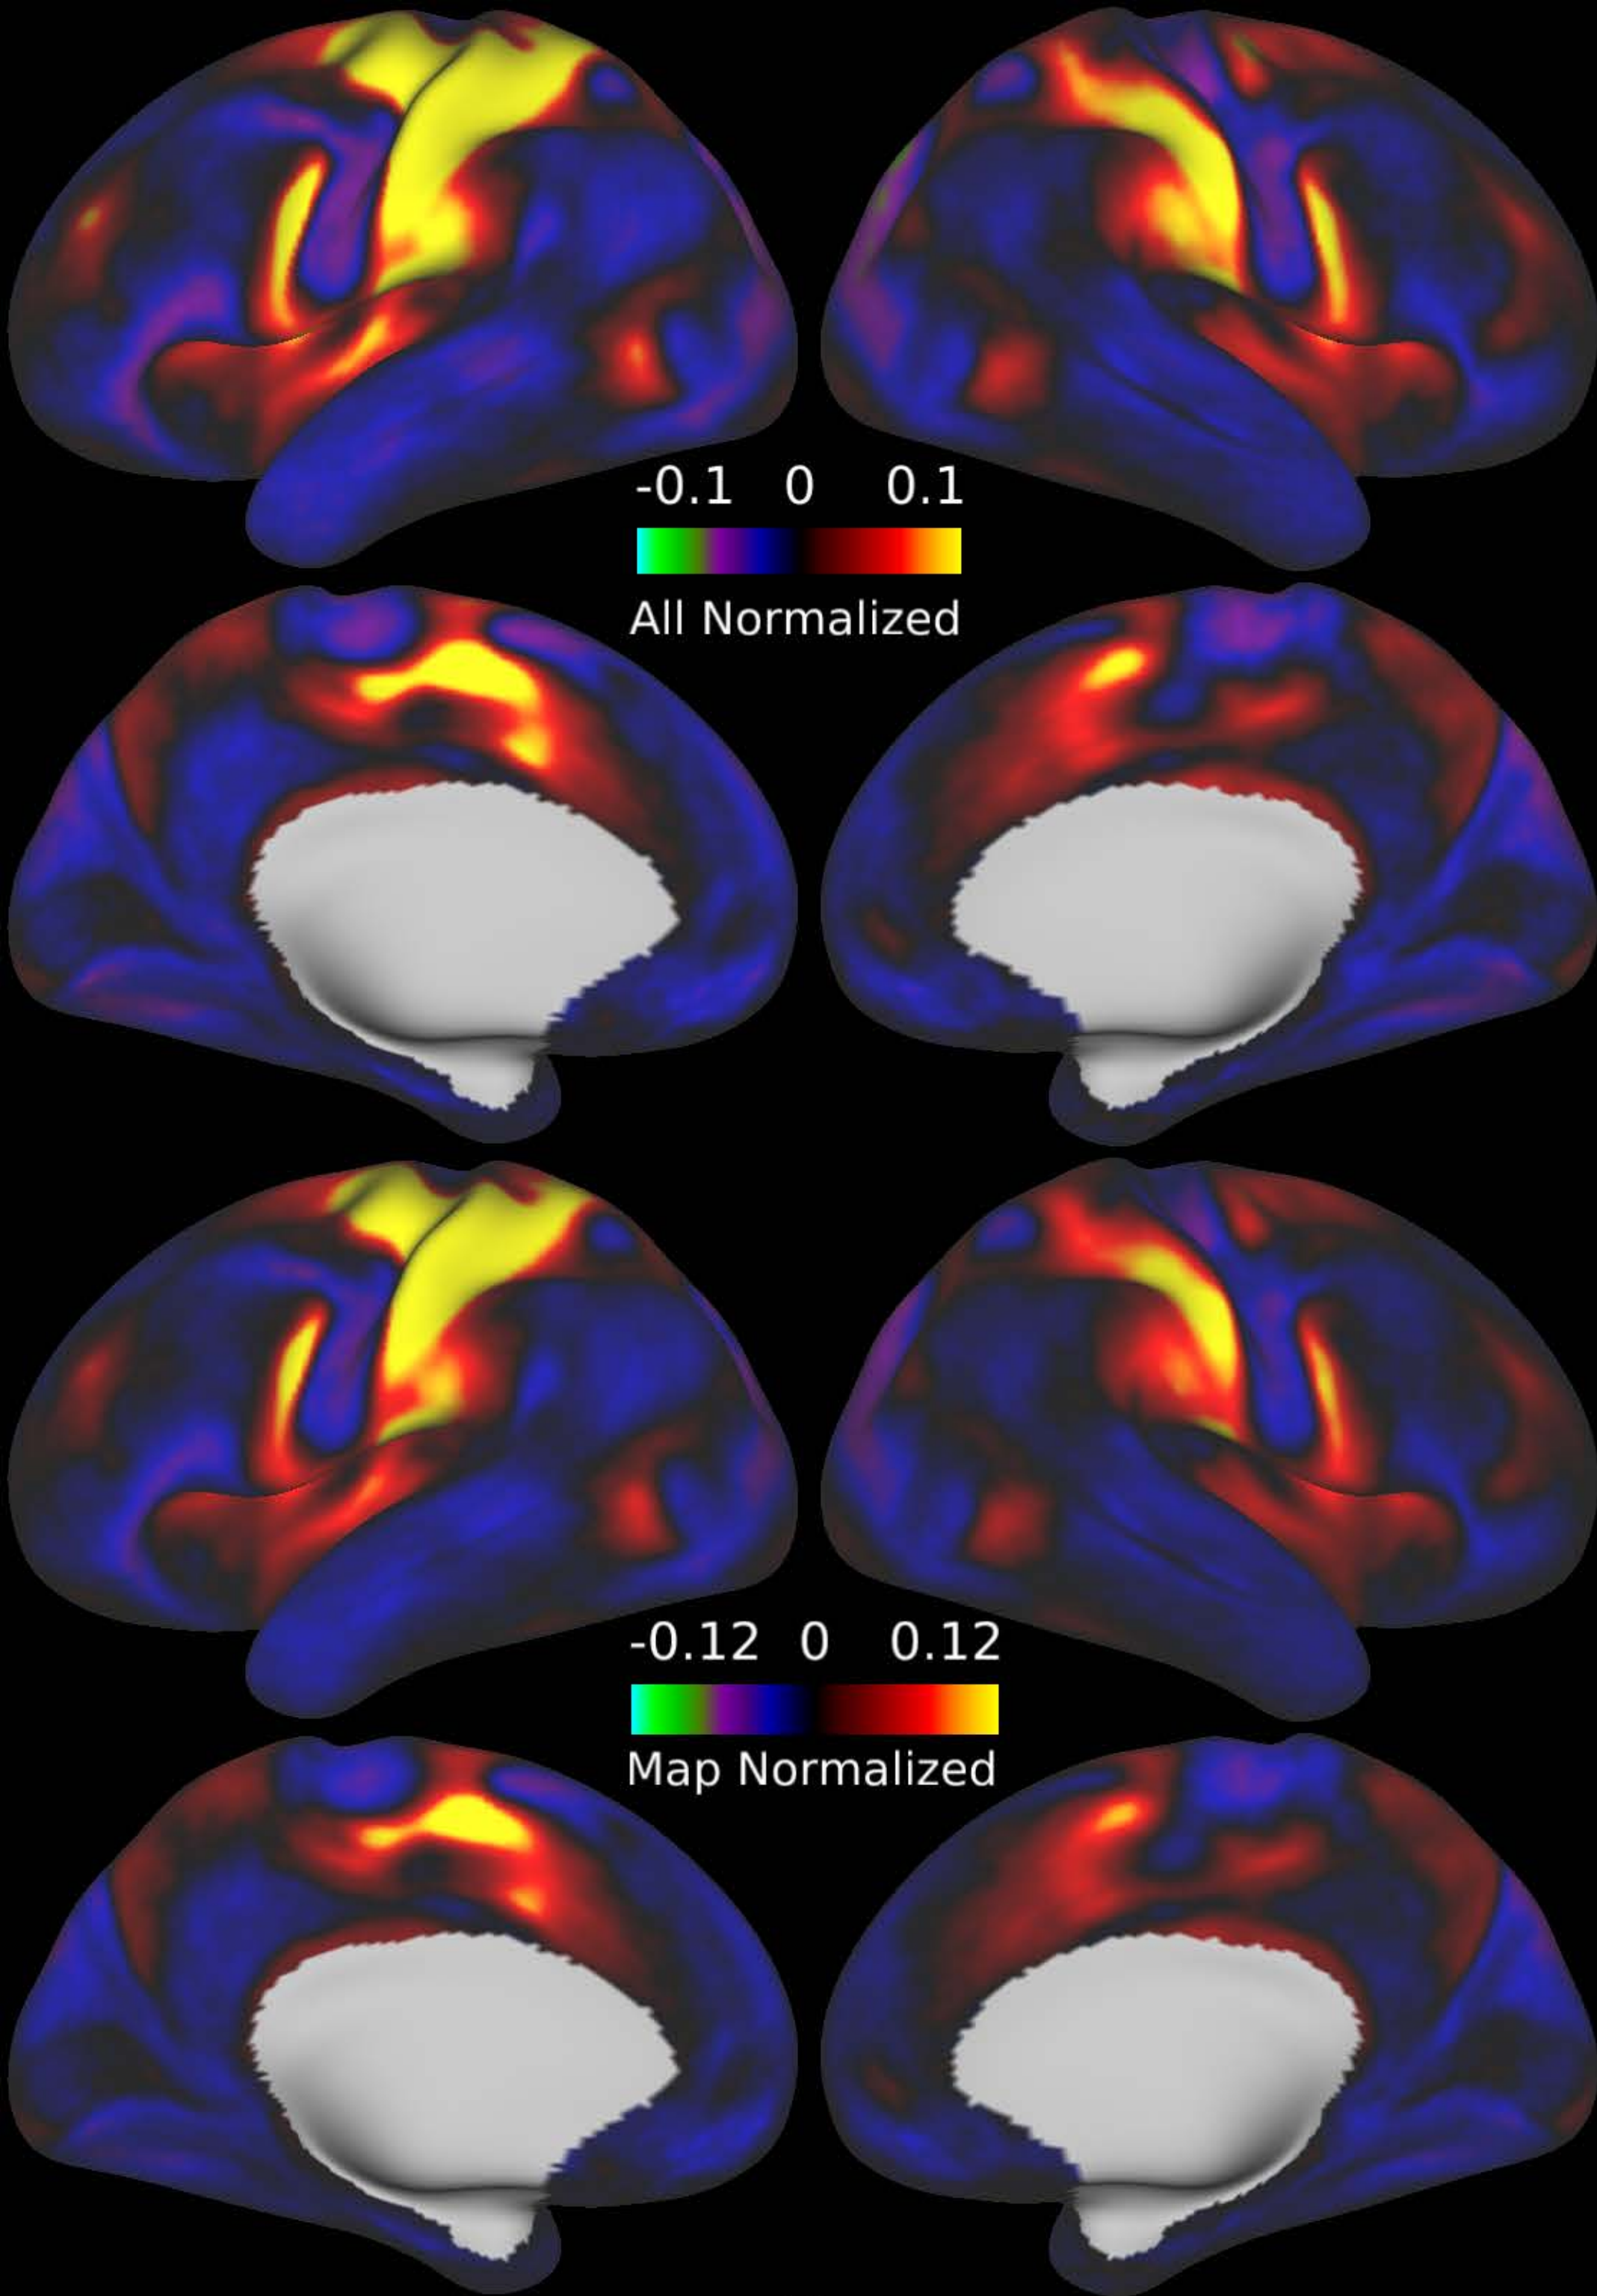

Hertz

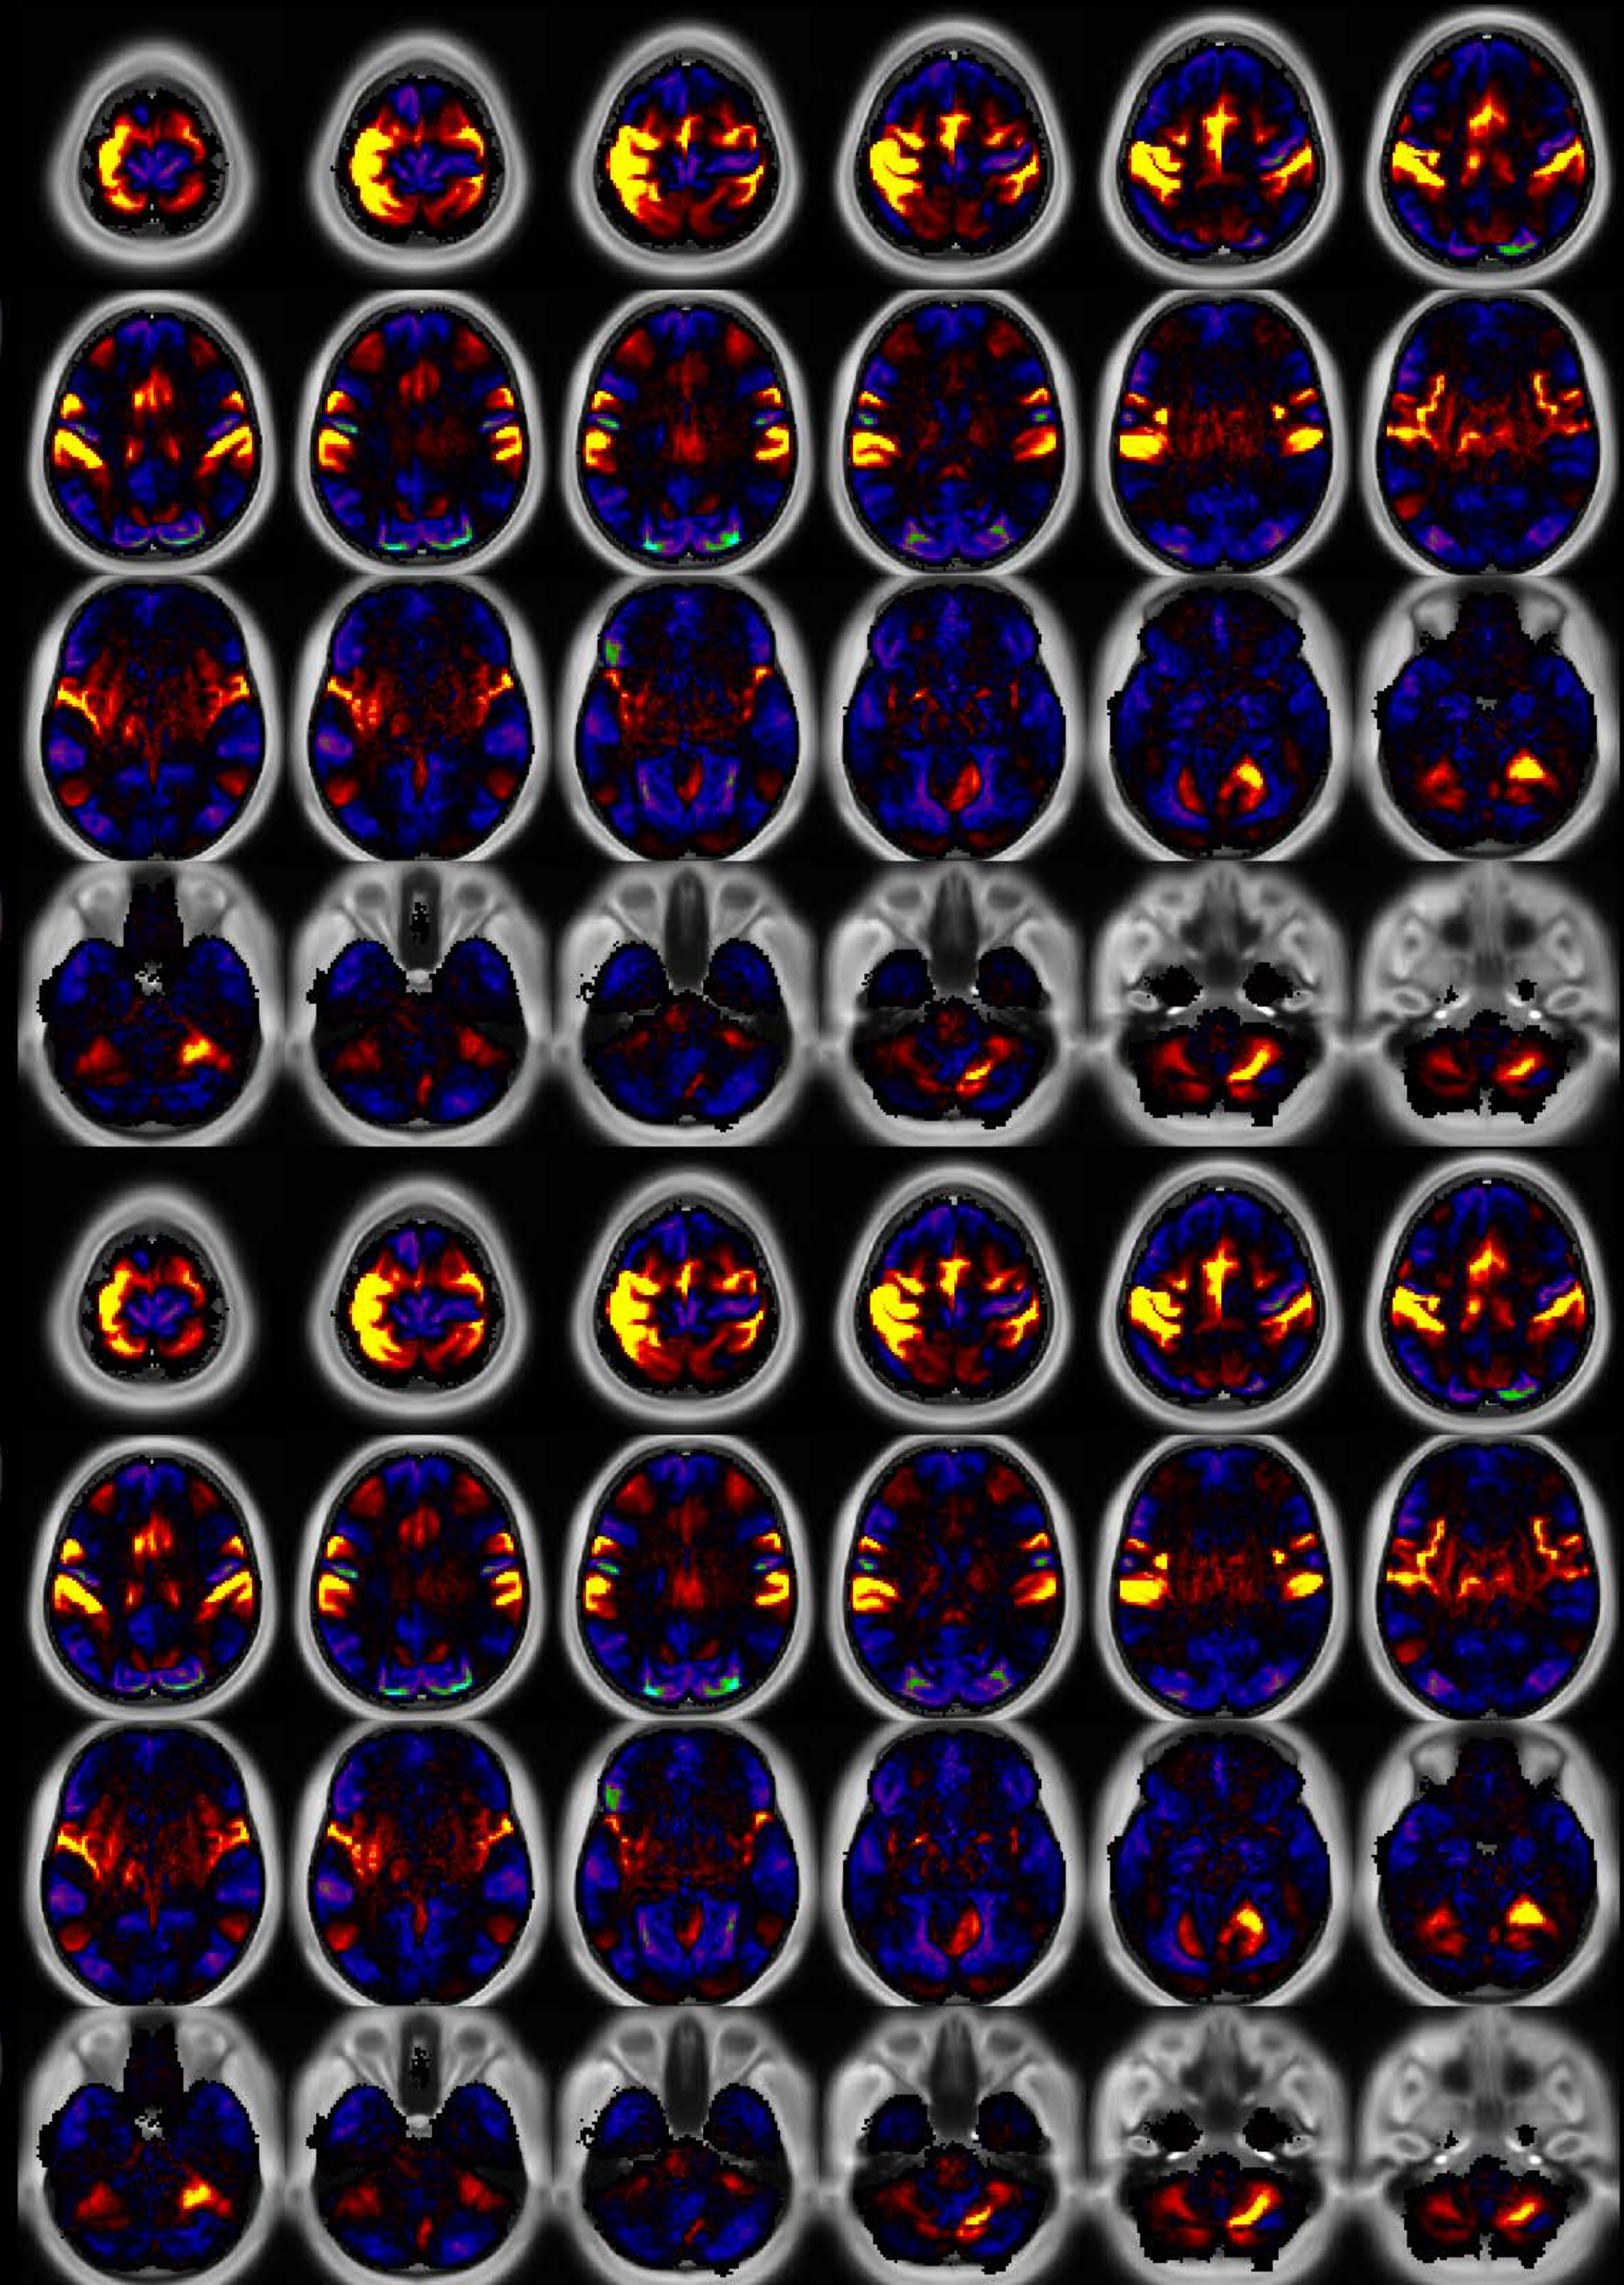

Seconds

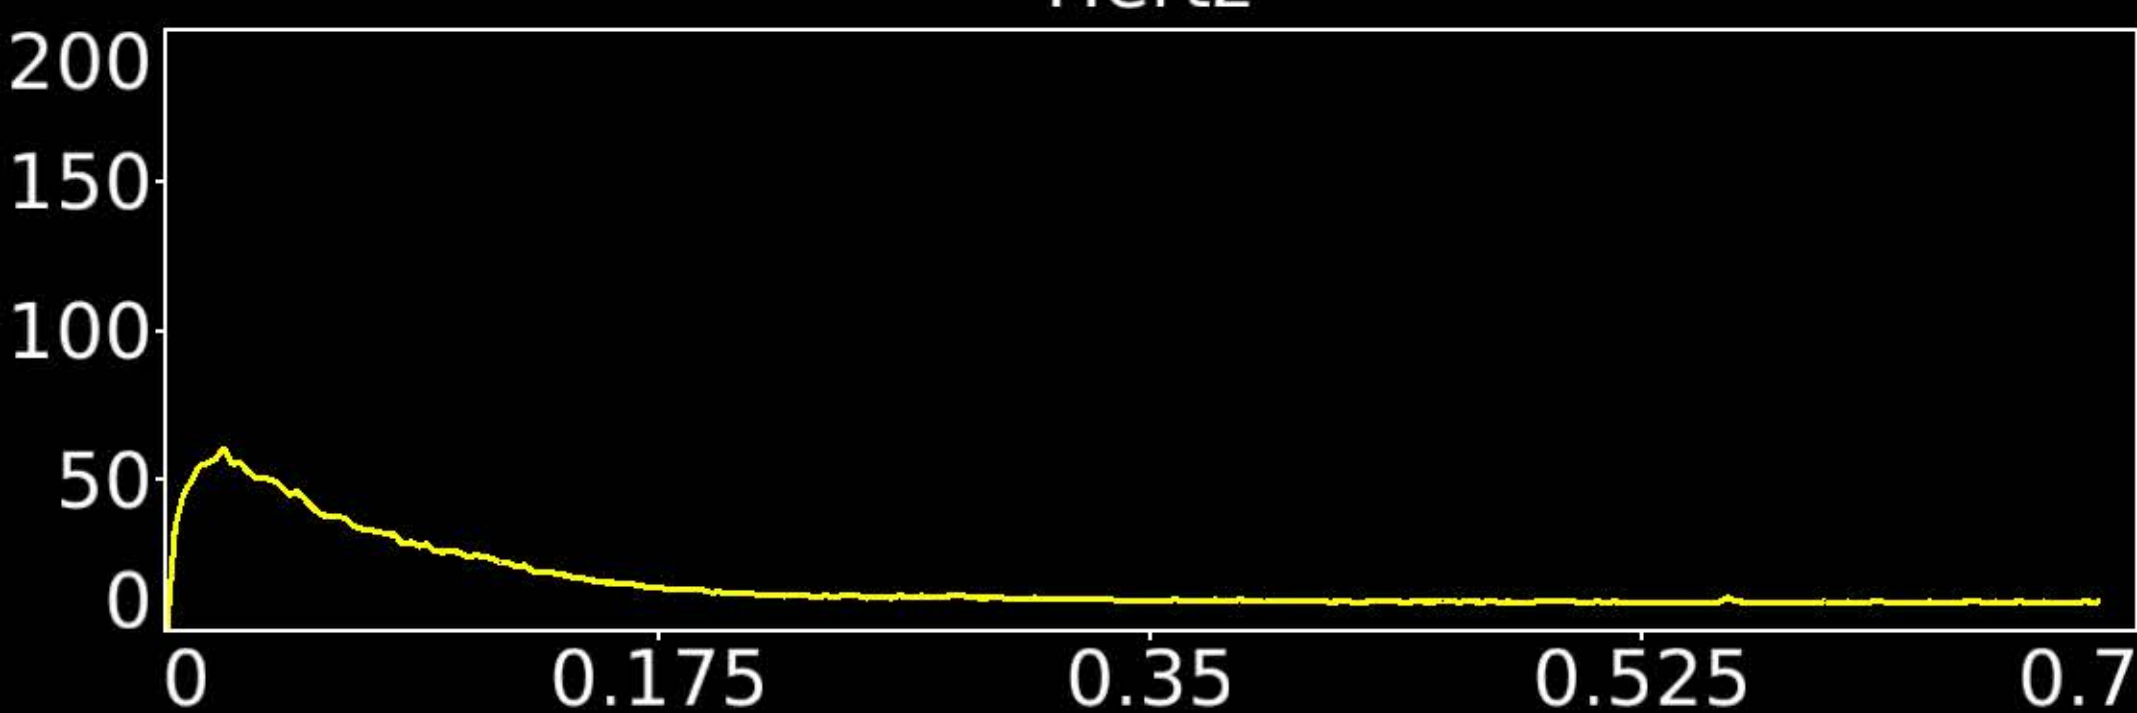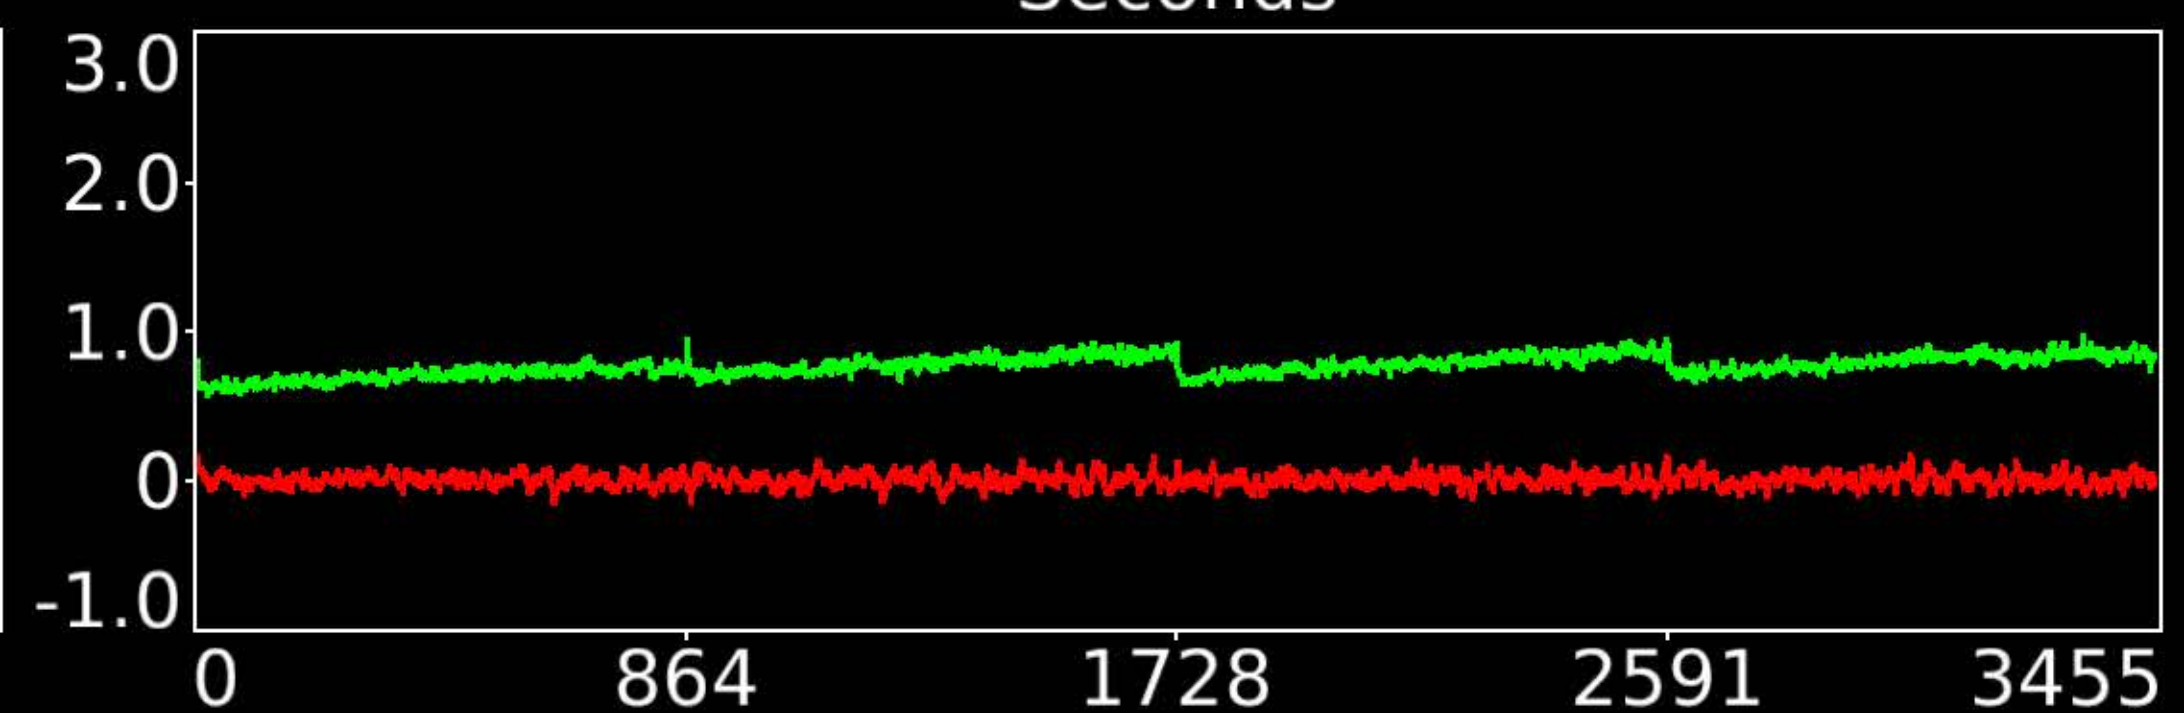

|                           |                            |                             |  |
|---------------------------|----------------------------|-----------------------------|--|
| Number & Class: 33 Signal |                            | Name: R Hand Motor Network  |  |
| RVT Correlated: No        | DVARS Dip Associated: Yes  | Cross-Subject Variable: Yes |  |
| Single Subject: No        | % Variance Explained: 1.07 | Globality Index: 0.25       |  |
| Task Component: 6         | Taskr Component: 7         | Sleep Noted: No             |  |

Rationale: Spatial map includes positive and negative patches that respect known somatotopic sensori-motor organization (Right Hand)



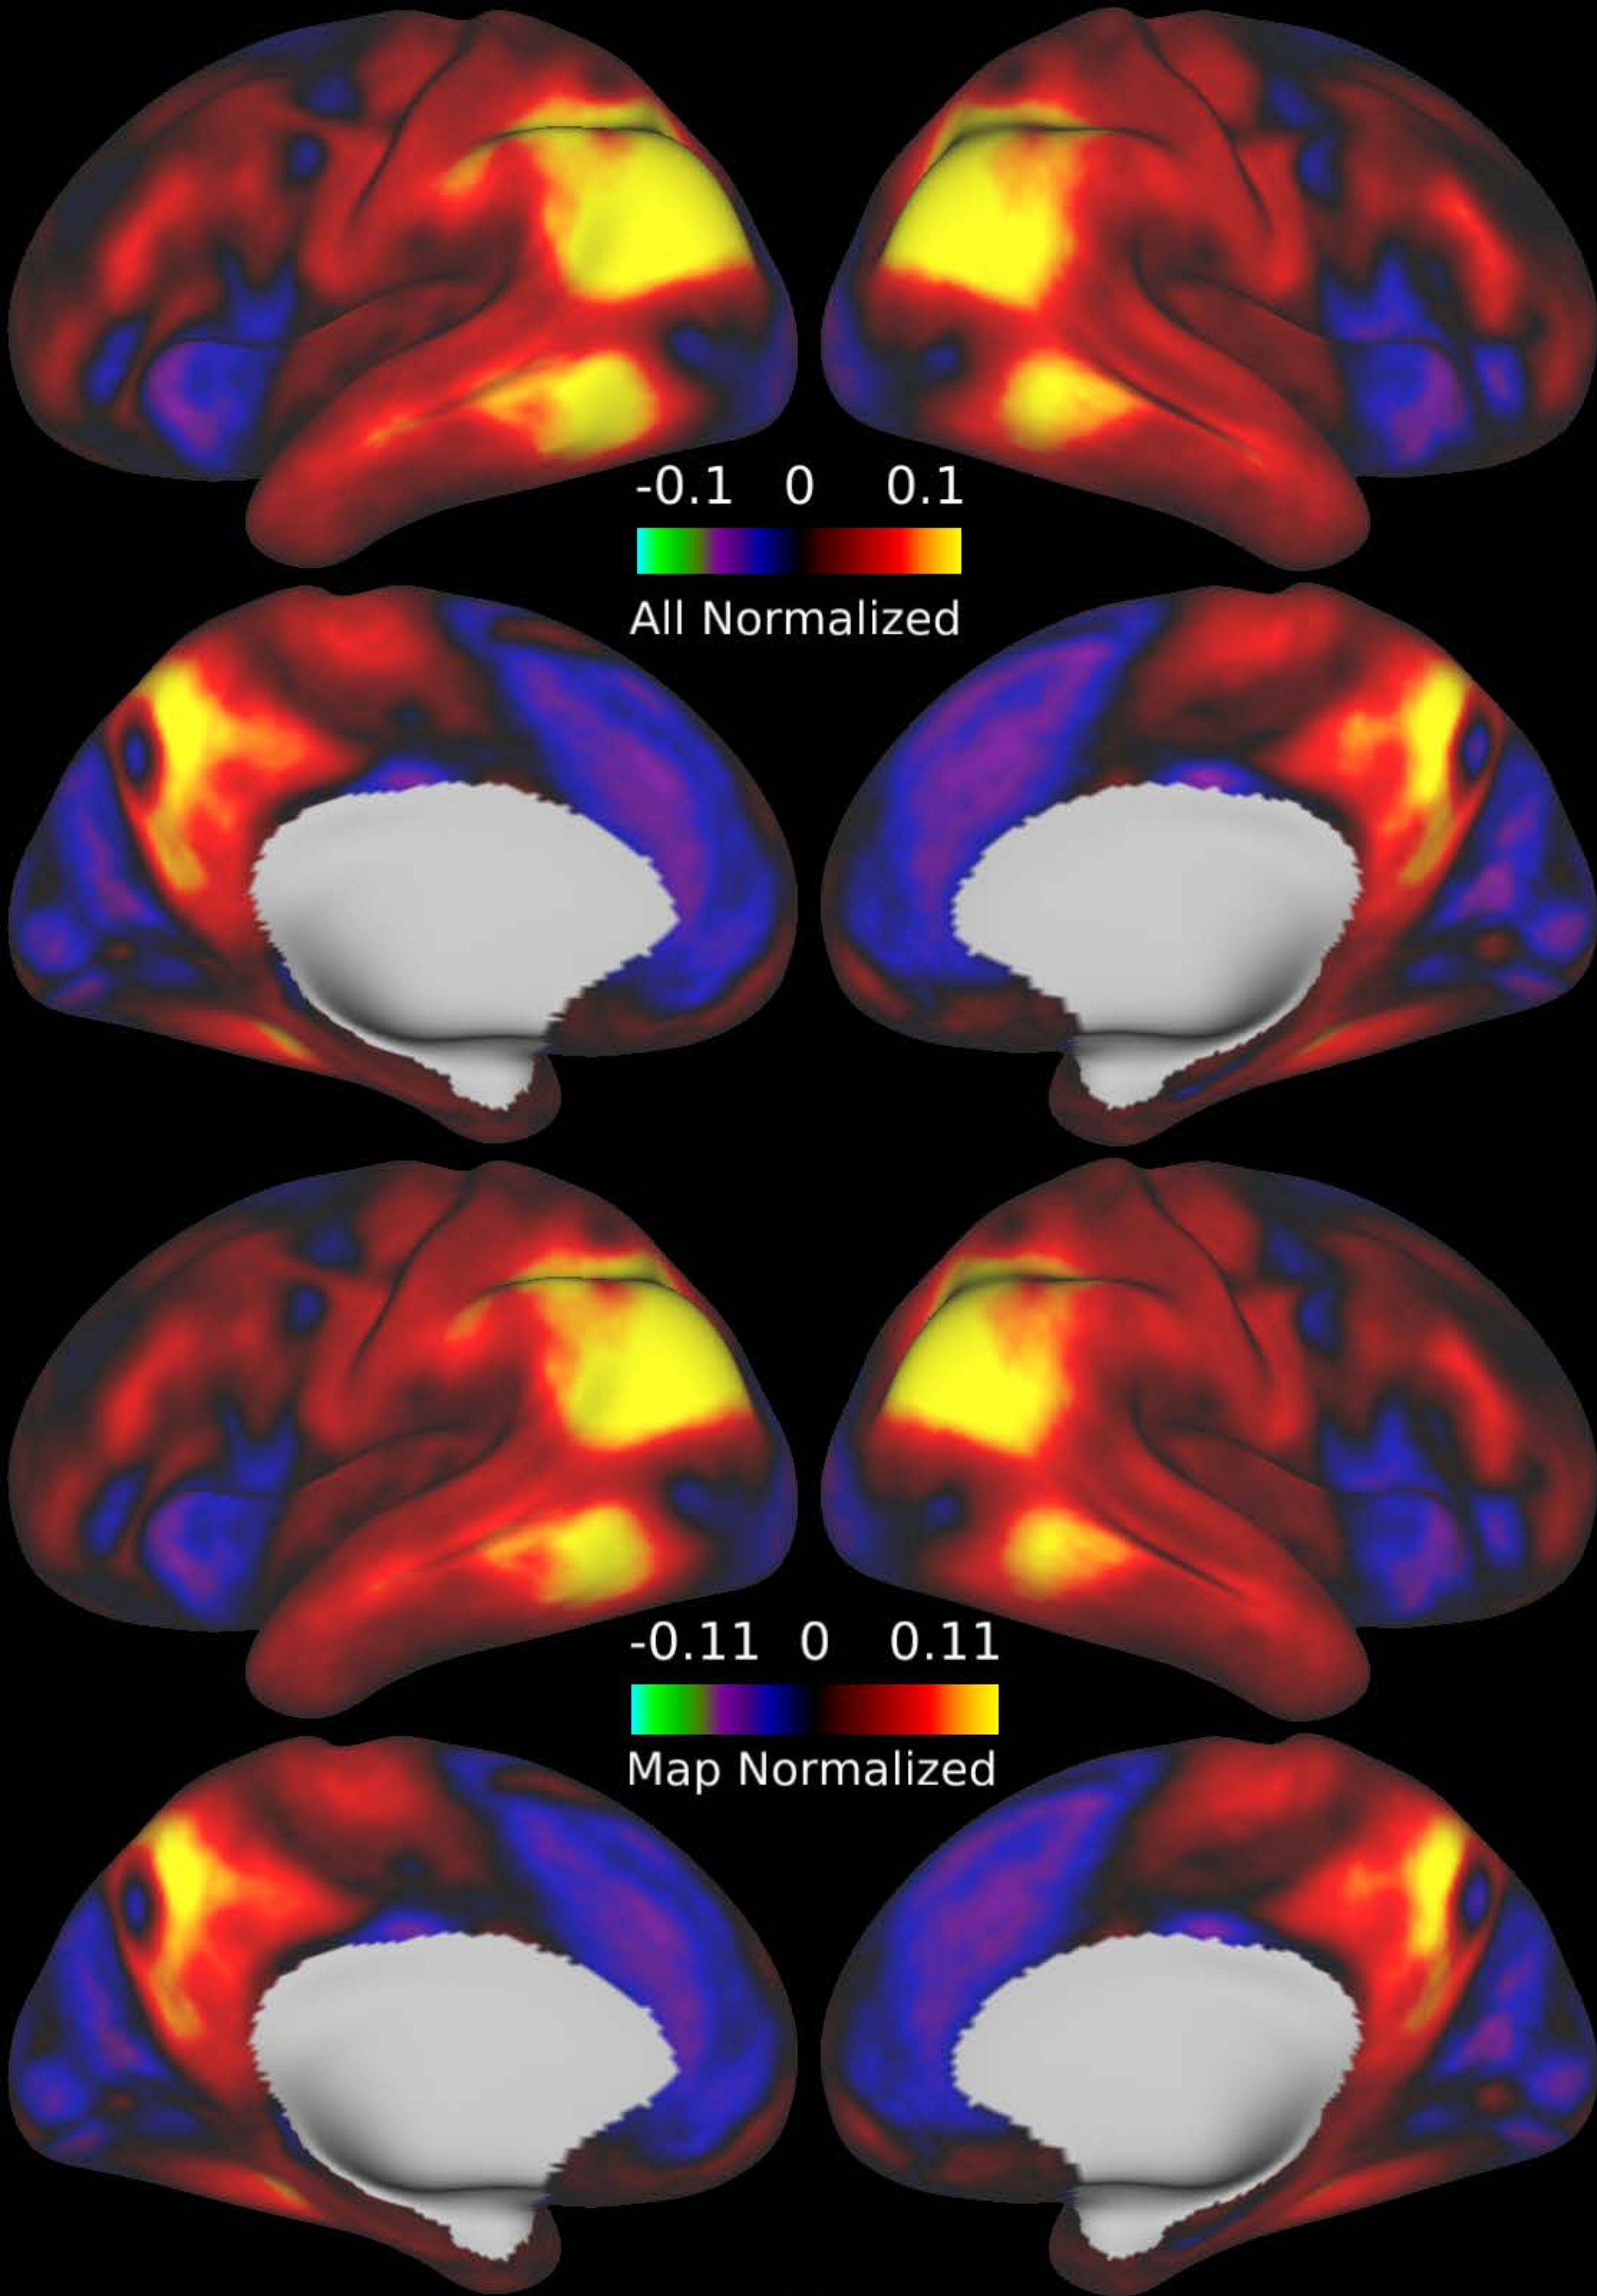

Hertz

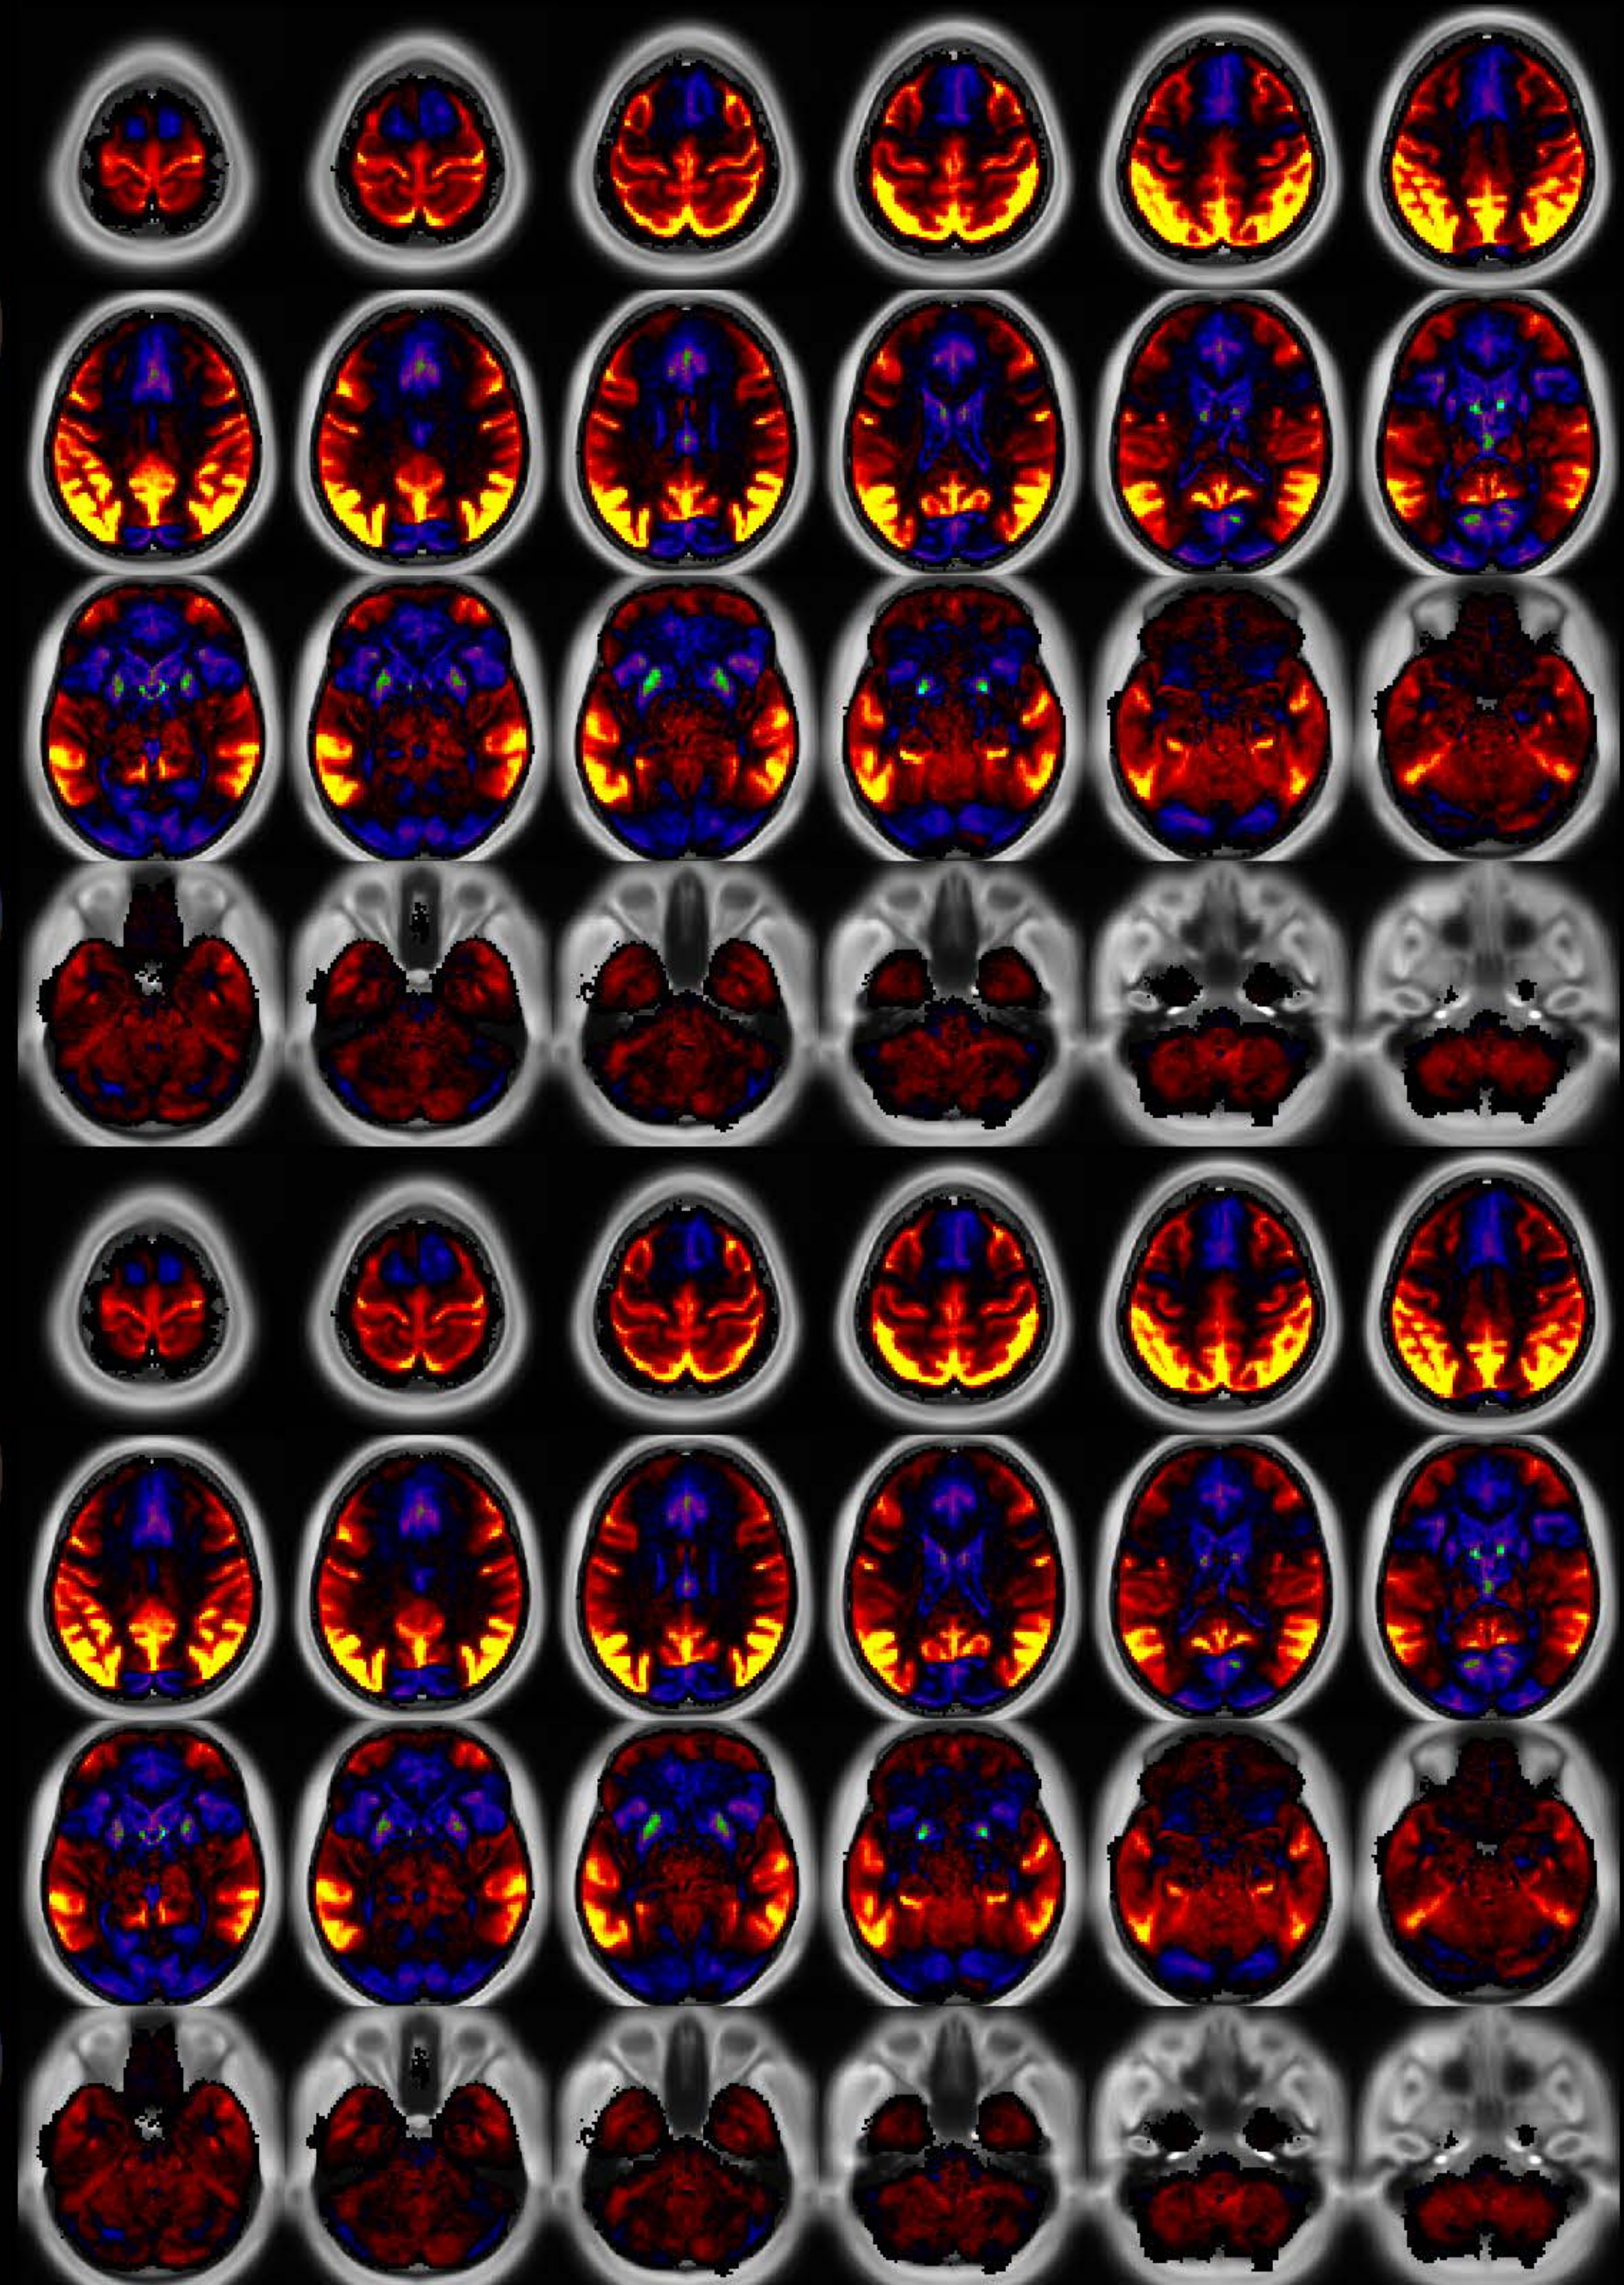

Seconds

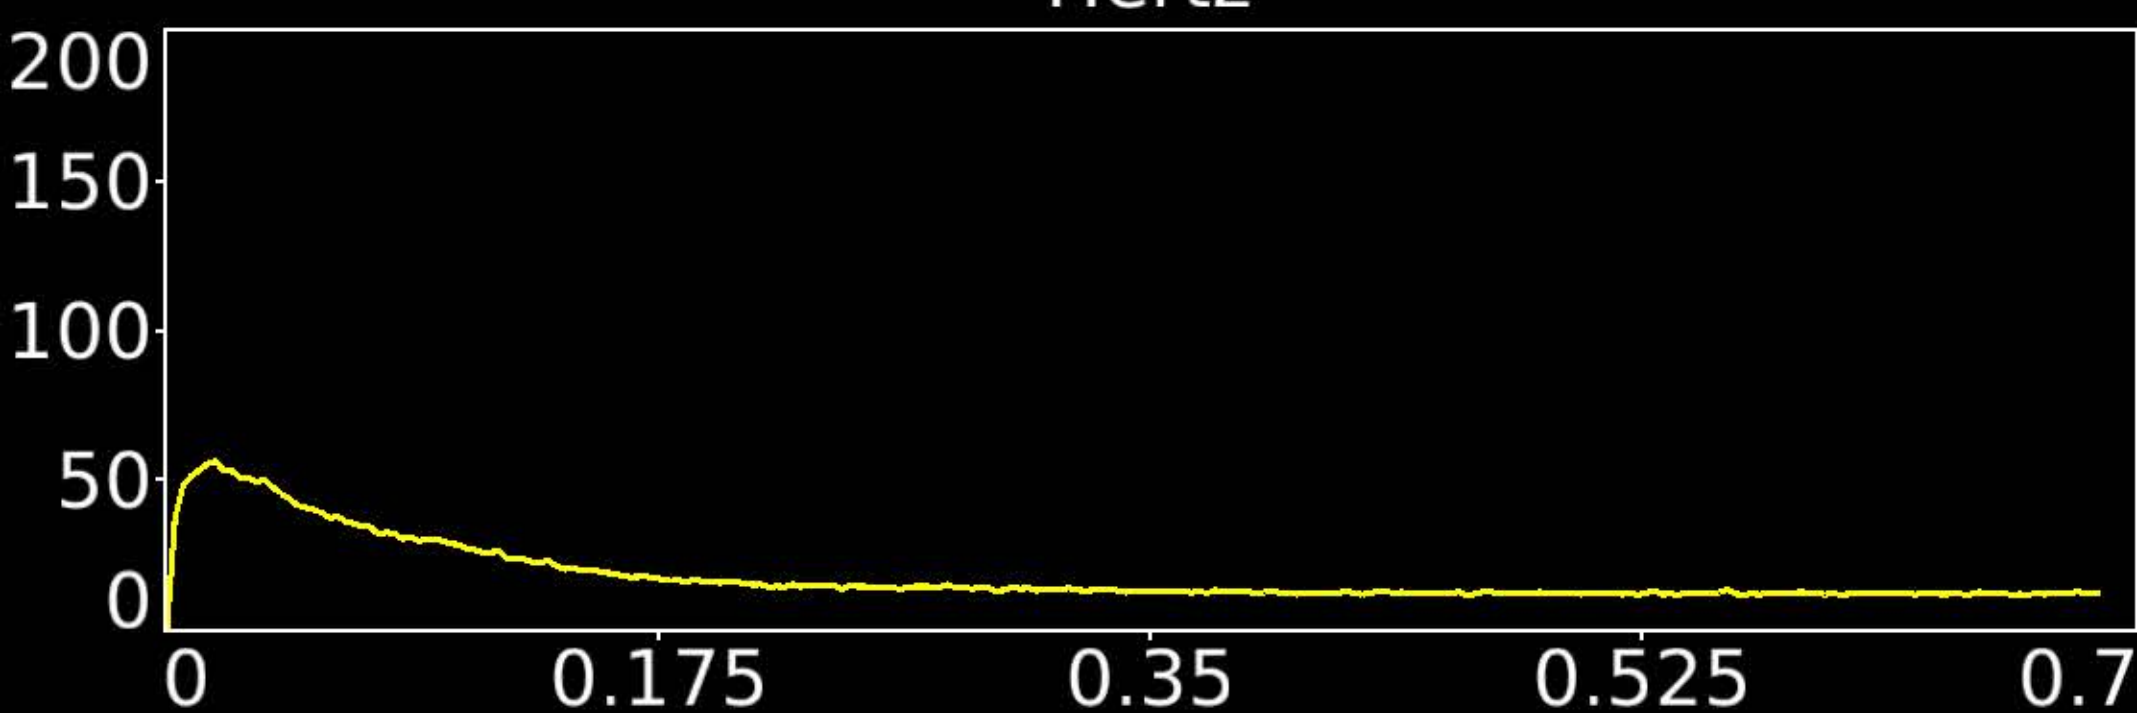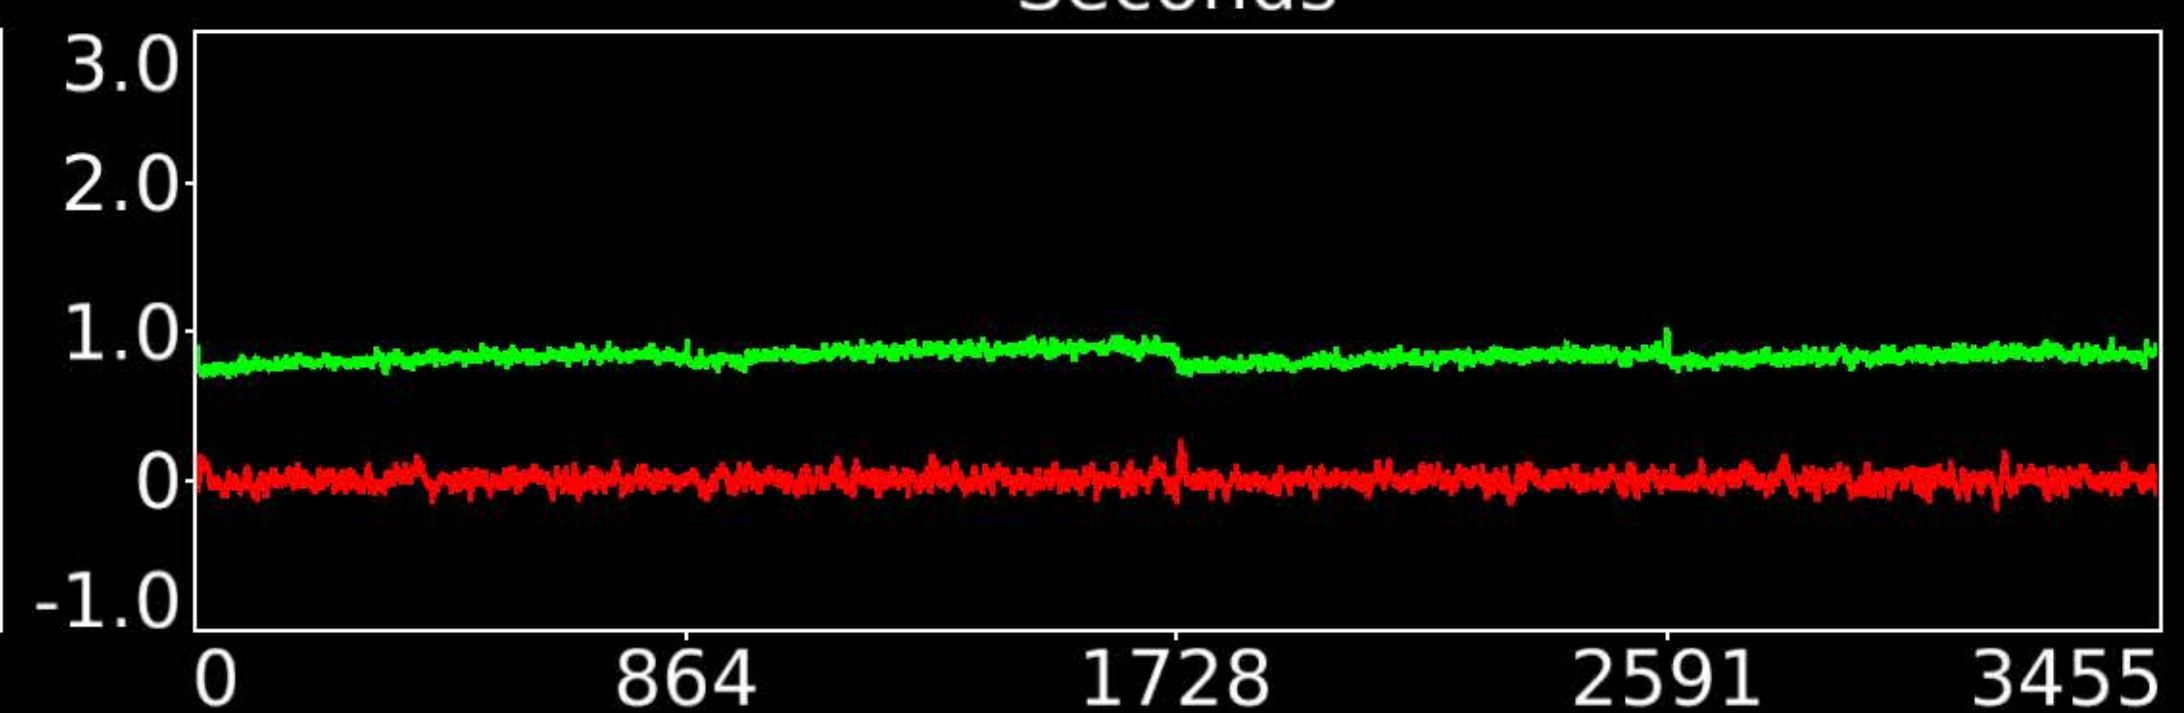

|                          |                            |                            |  |
|--------------------------|----------------------------|----------------------------|--|
| Number & Class: 34 Noise |                            | Name: DVARS Assoc          |  |
| RVT Correlated: No       | DVARS Dip Associated: Yes  | Cross-Subject Variable: No |  |
| Single Subject: No       | % Variance Explained: 1.03 | Globality Index: 1.64      |  |
| Task Component: No       | Taskr Component: No        | Sleep Noted: No            |  |

Rationale: Controversial: Spatial map is challenging to interpret so component was primarily classified on the basis of being associated with DVARS dips



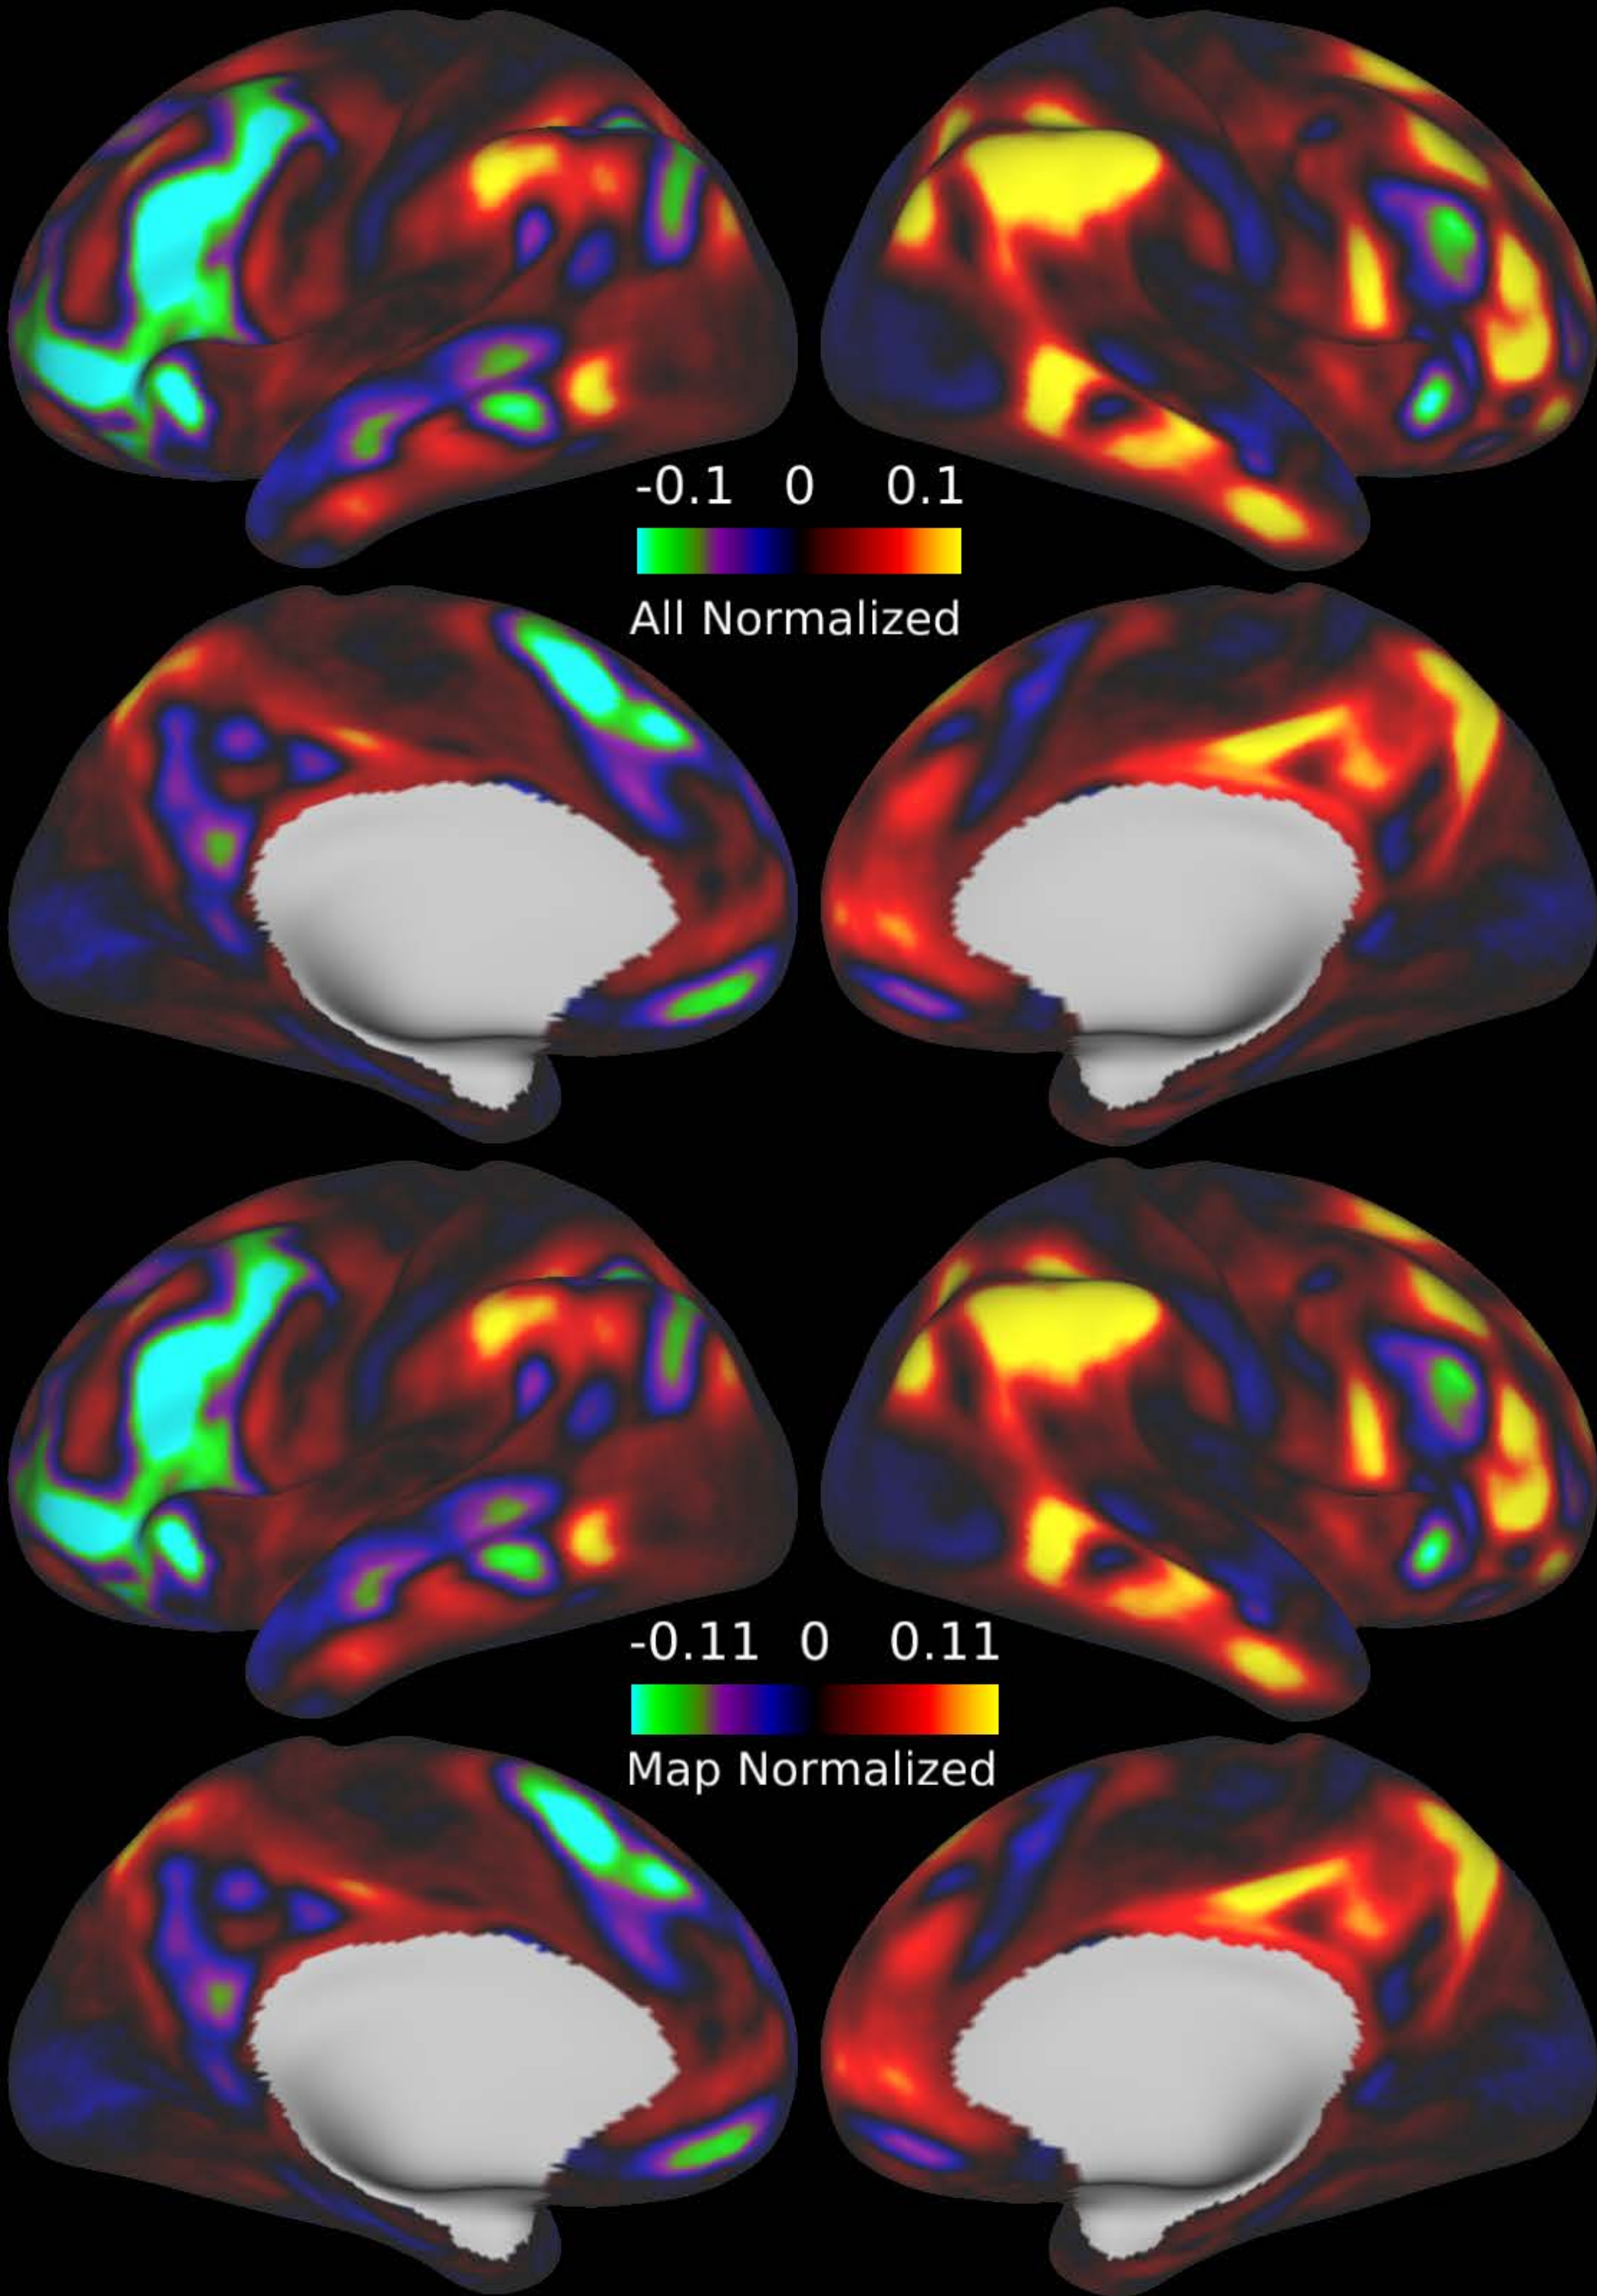

Hertz

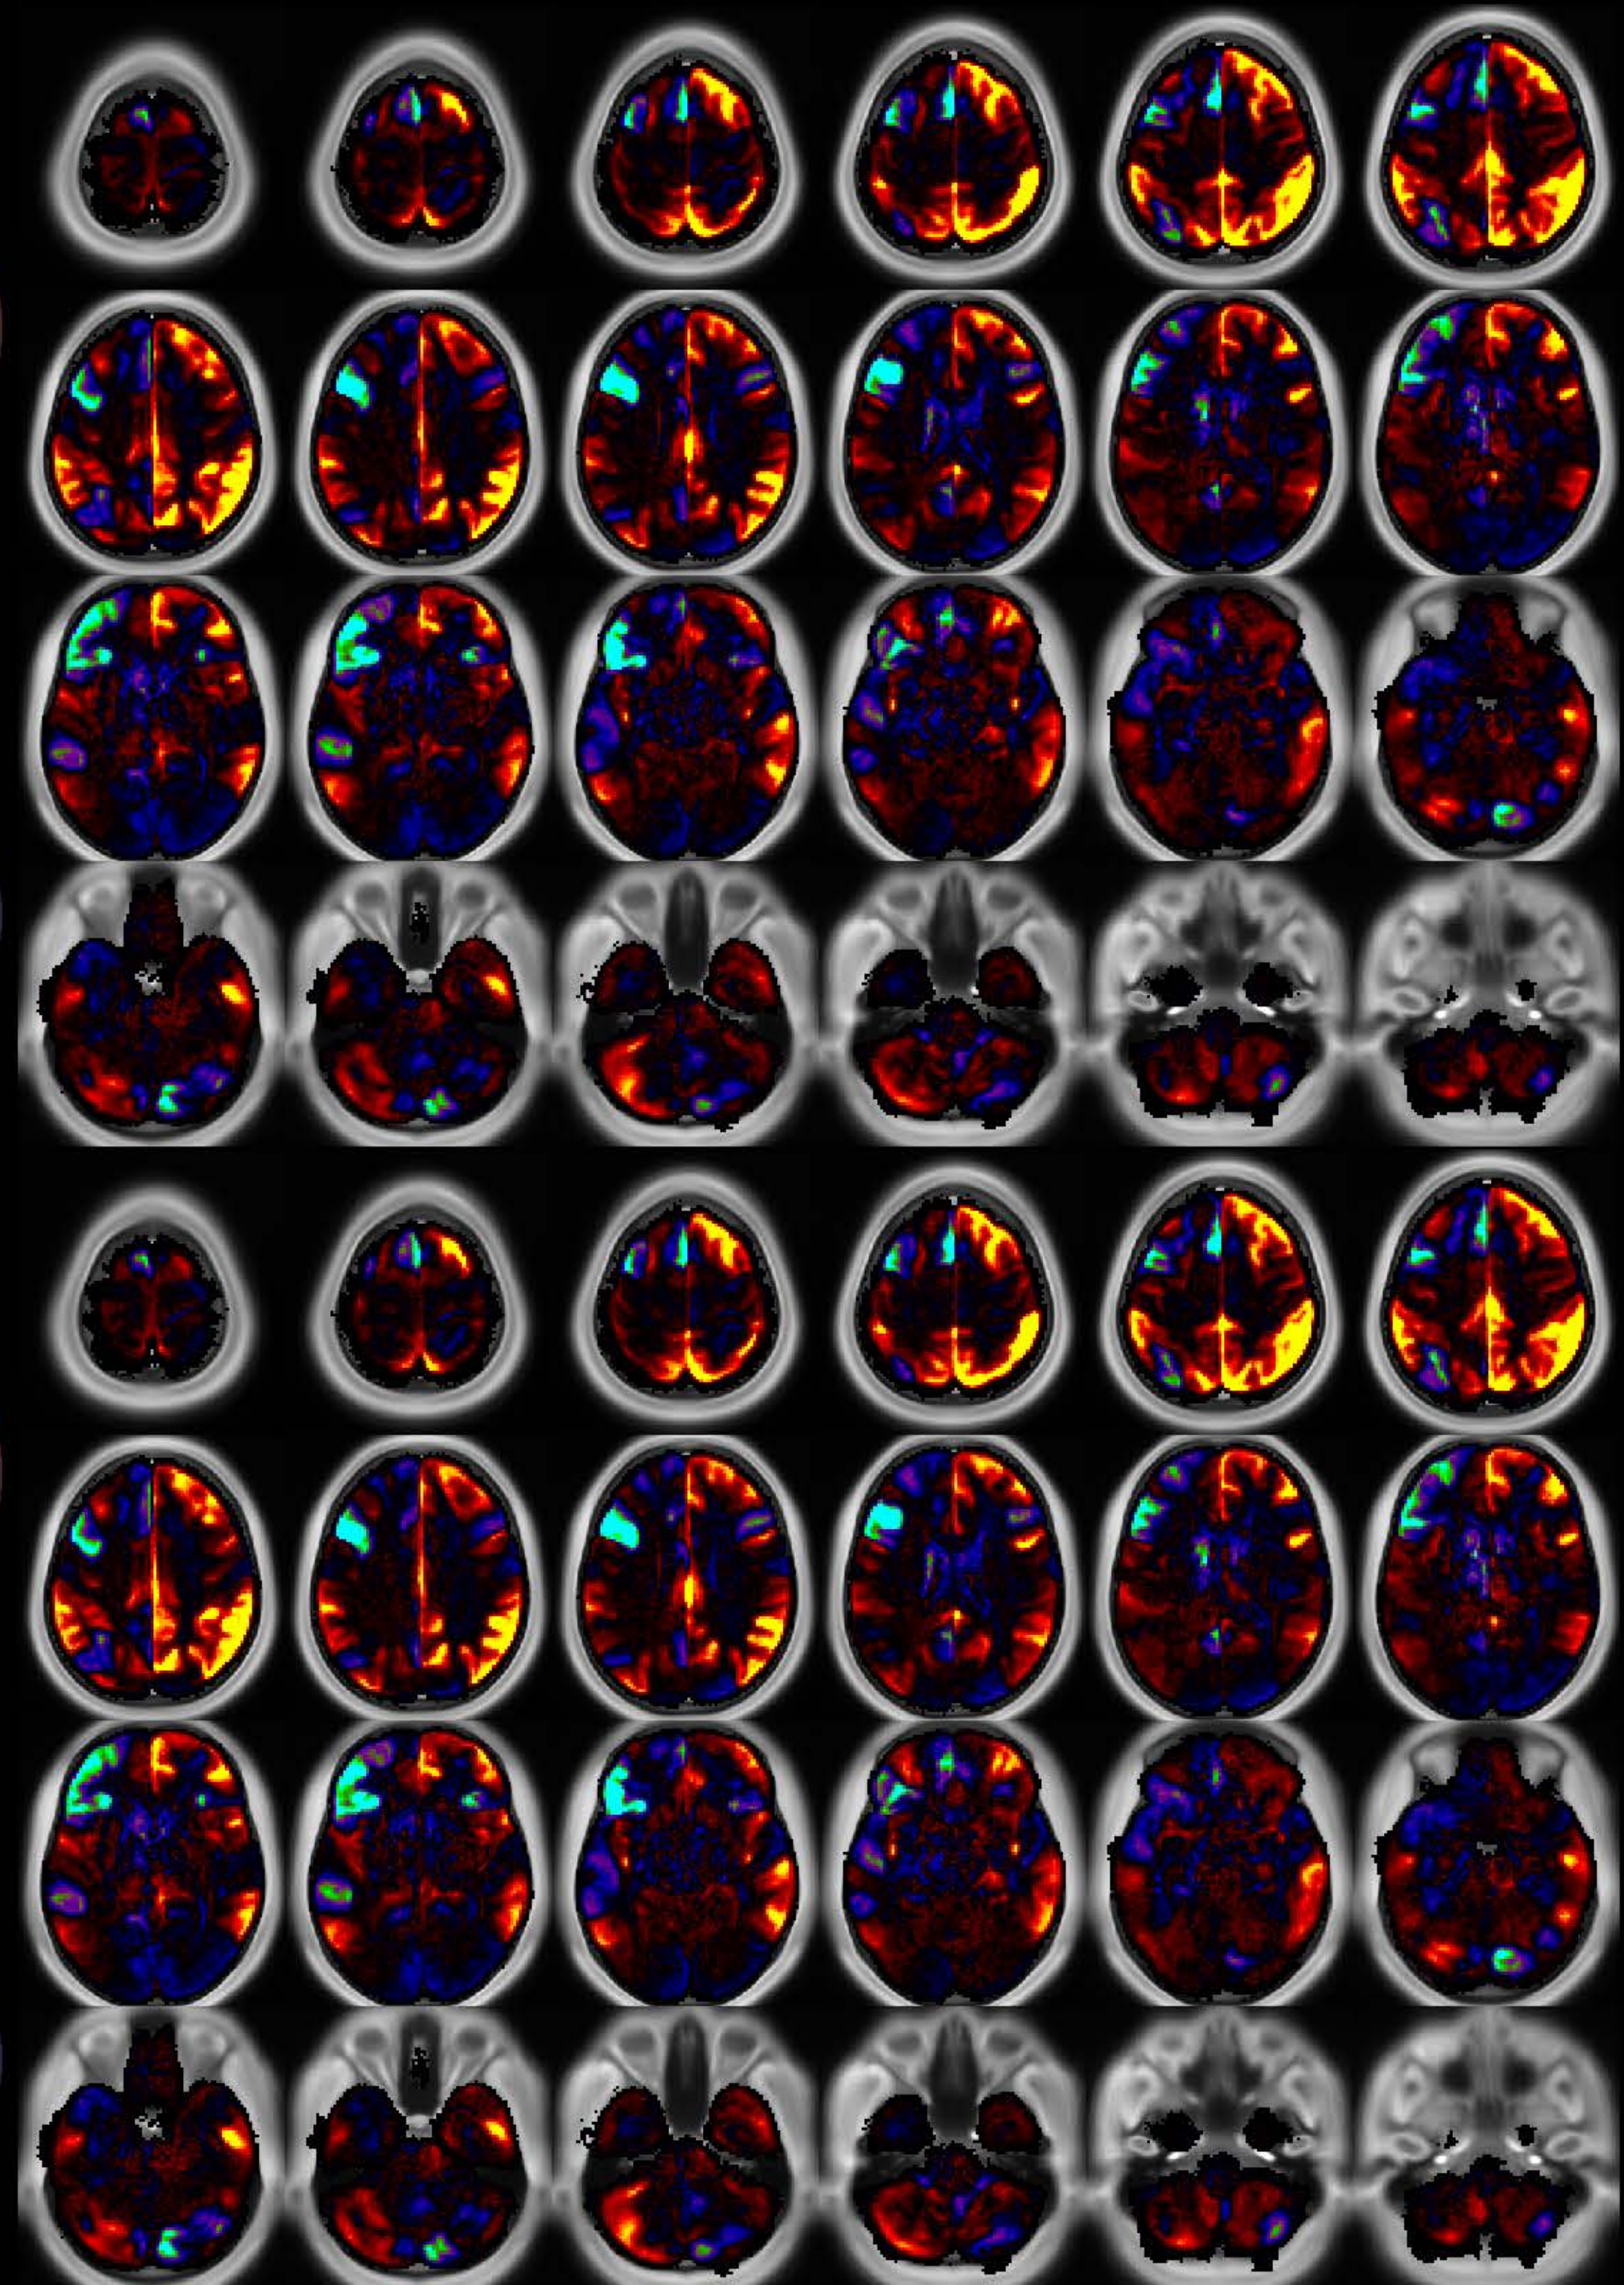

Seconds

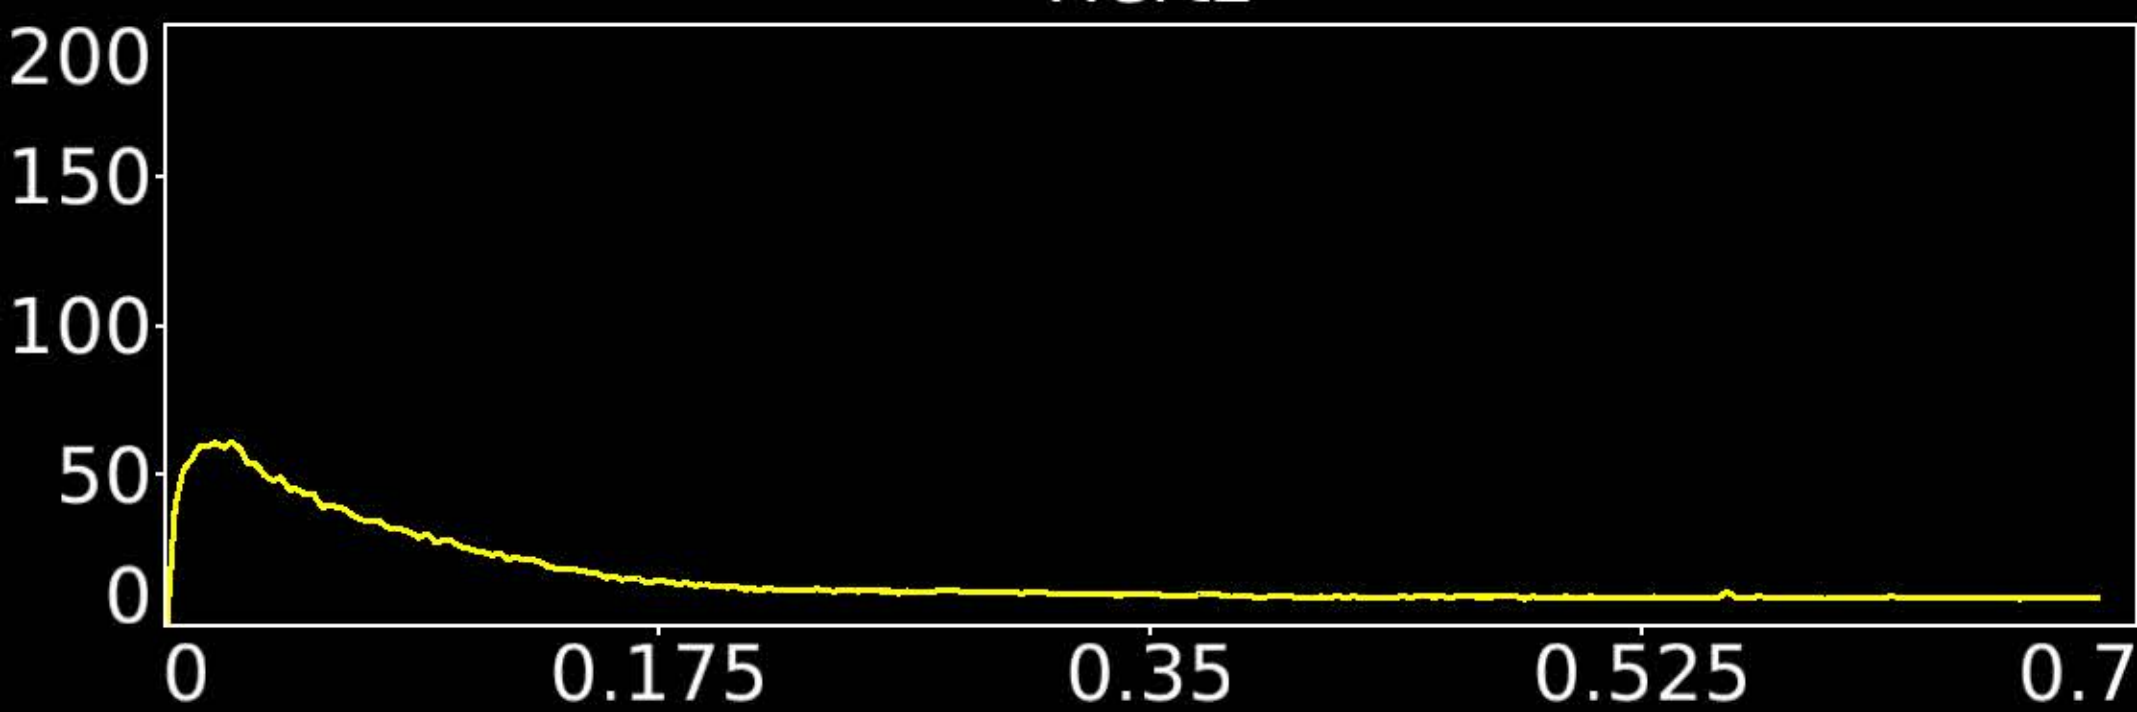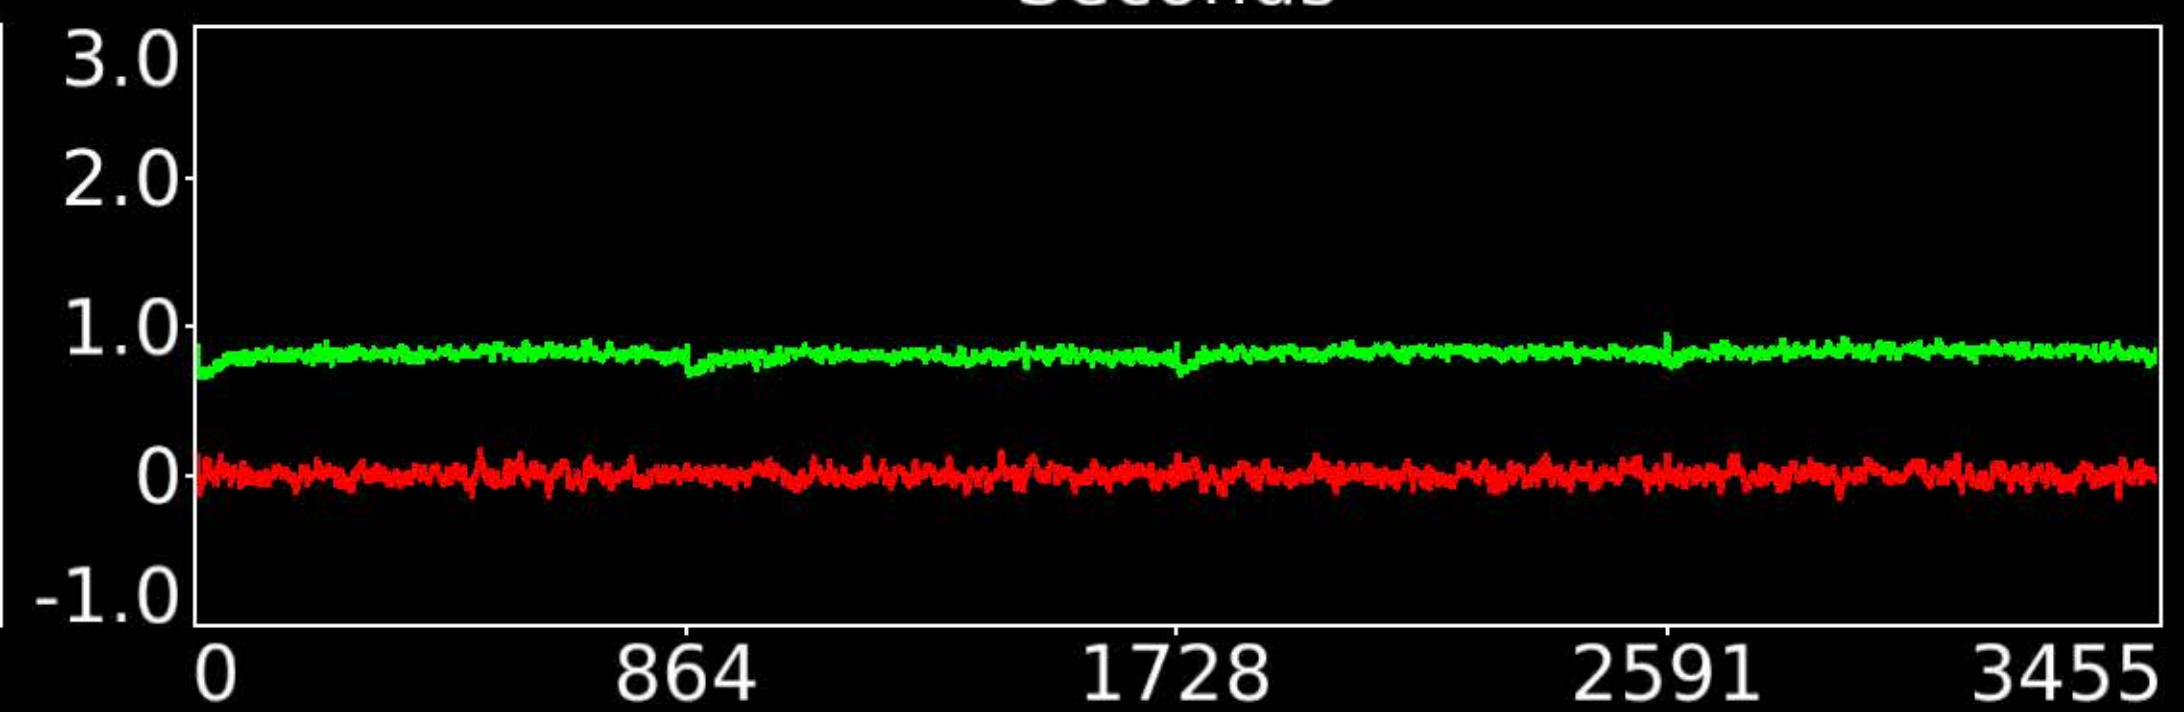

|                                                                                                                      |                            |                                             |  |
|----------------------------------------------------------------------------------------------------------------------|----------------------------|---------------------------------------------|--|
| Number & Class: 35 Signal                                                                                            |                            | Name: R Unknown Network > L Unknown Network |  |
| RVT Correlated: No                                                                                                   | DVARS Dip Associated: No   | Cross-Subject Variable: No                  |  |
| Single Subject: No                                                                                                   | % Variance Explained: 1.03 | Globality Index: 0.89                       |  |
| Task Component: No                                                                                                   | Taskr Component: No        | Sleep Noted: No                             |  |
| Rationale: Spatial map includes positive and negative patches that respect known RSNs (e.g. Fronto-Parietal Network) |                            |                                             |  |



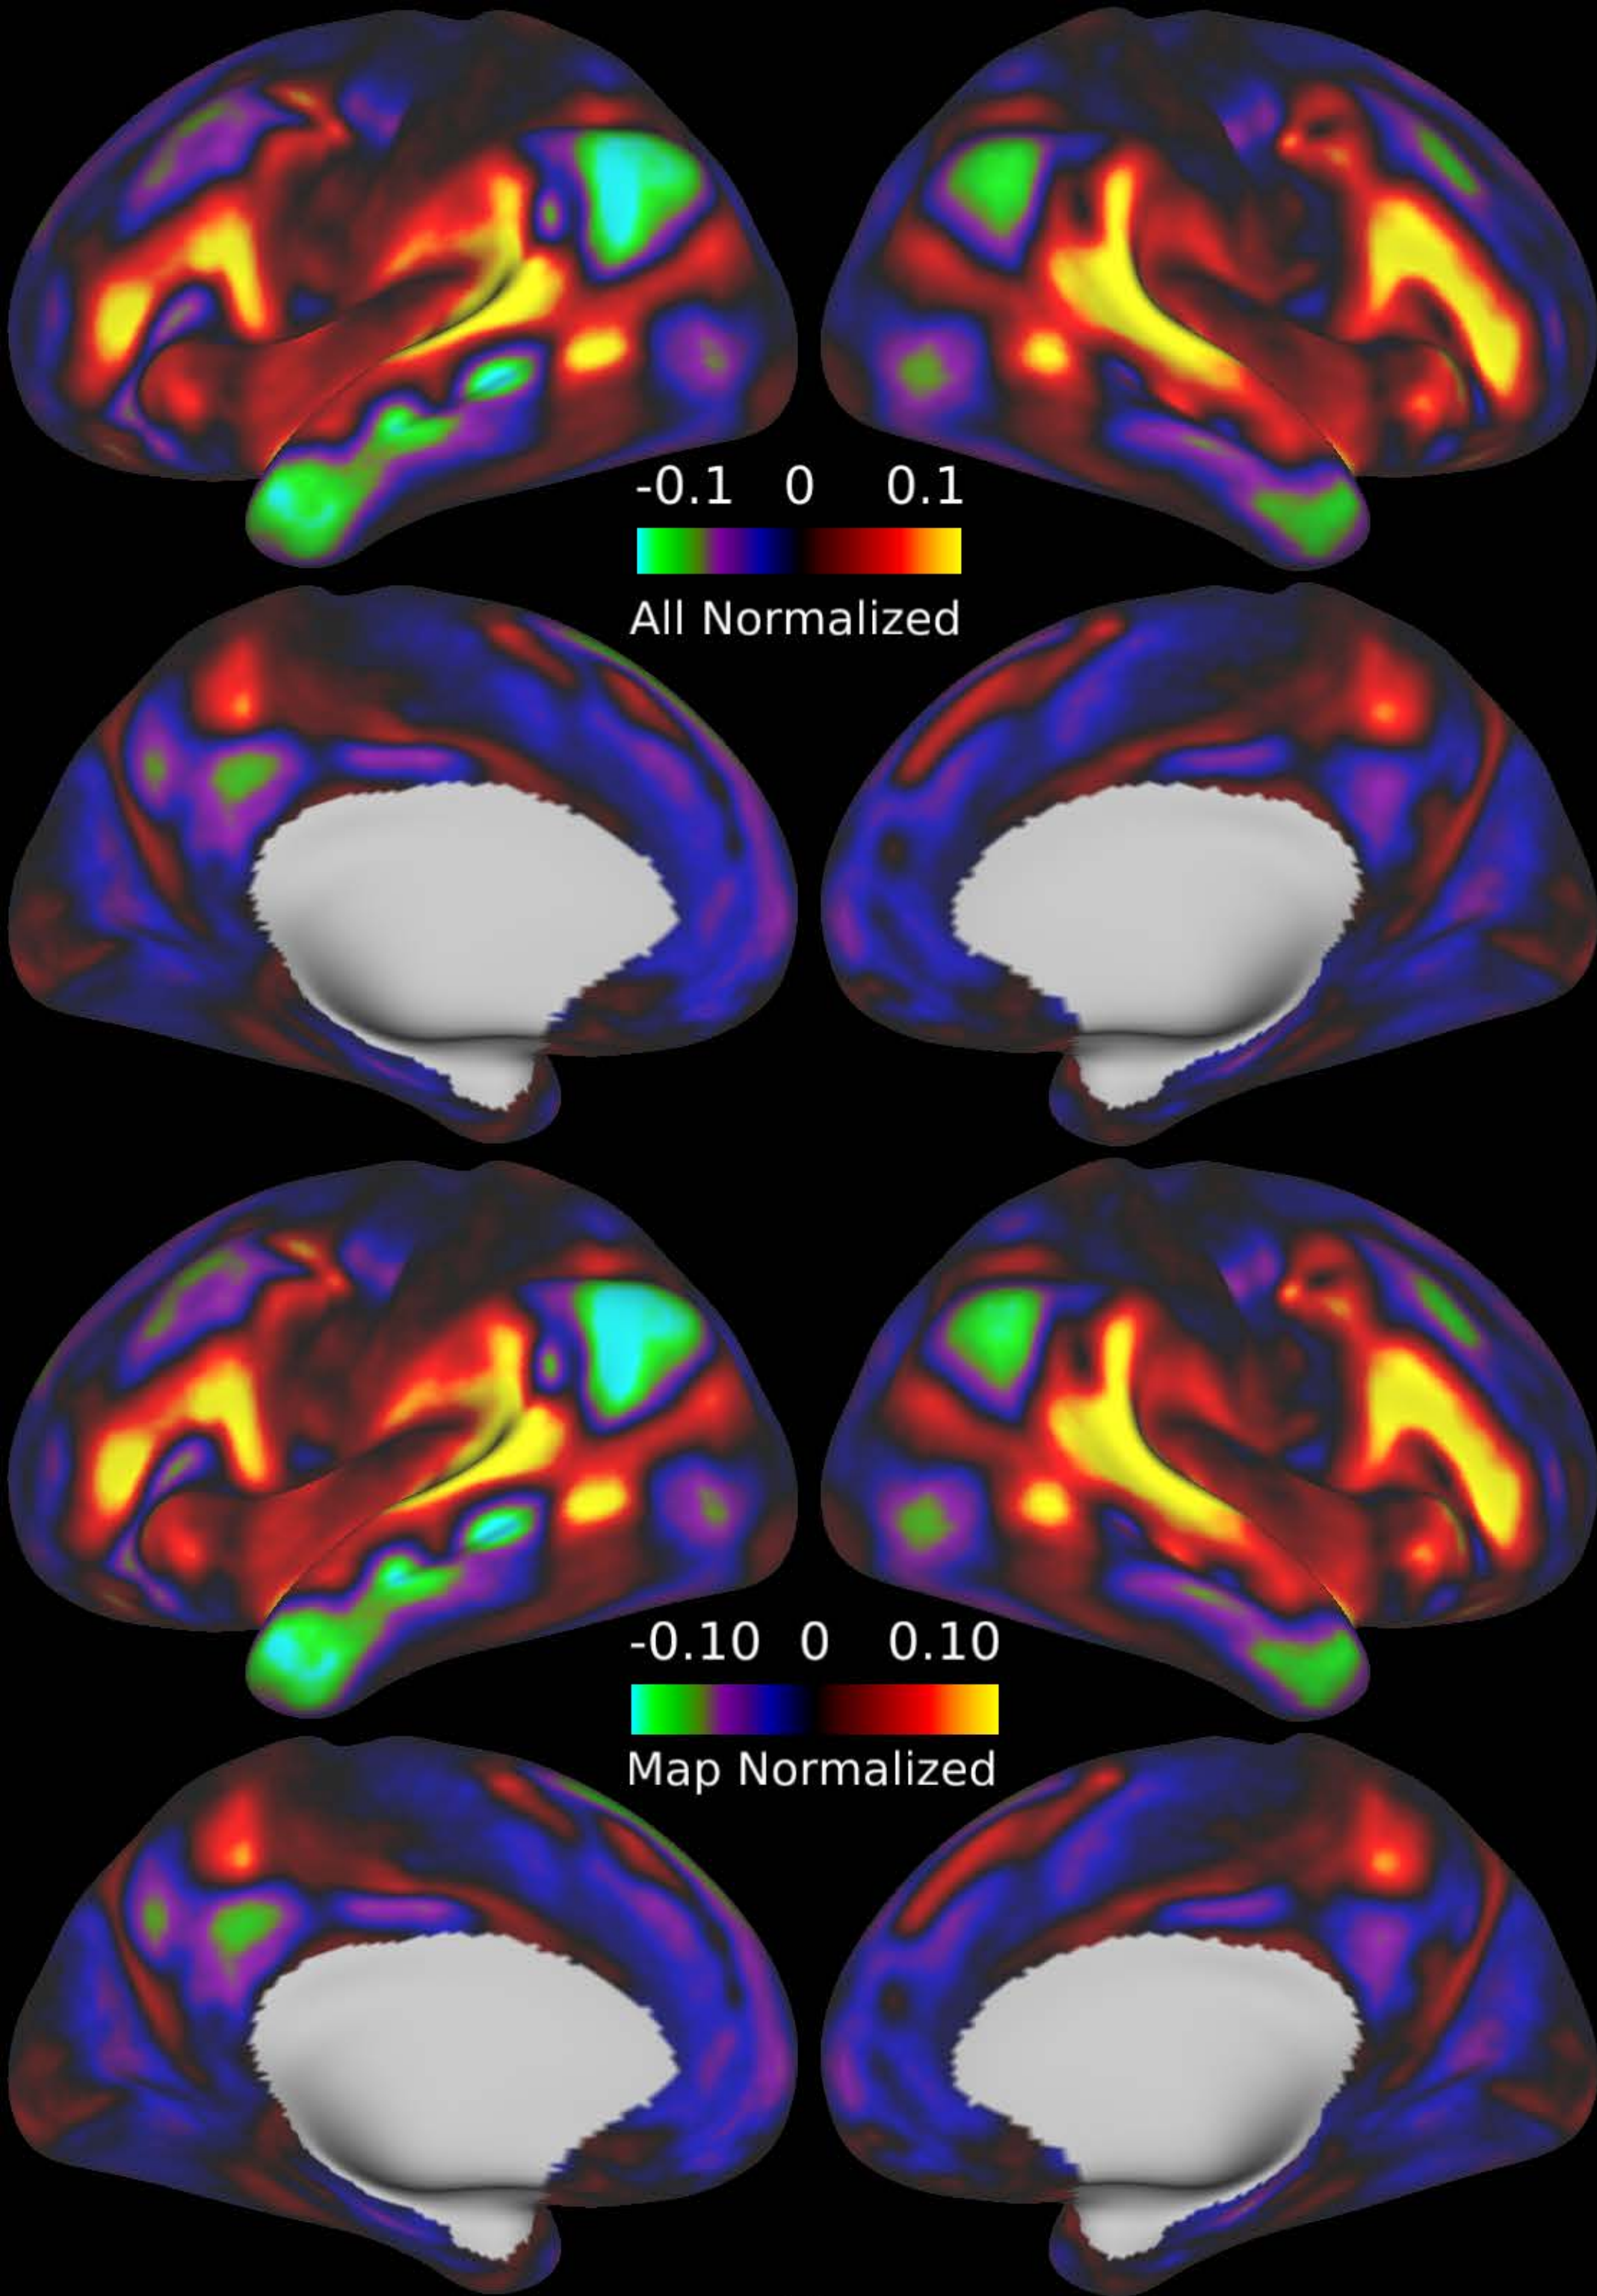

Hertz

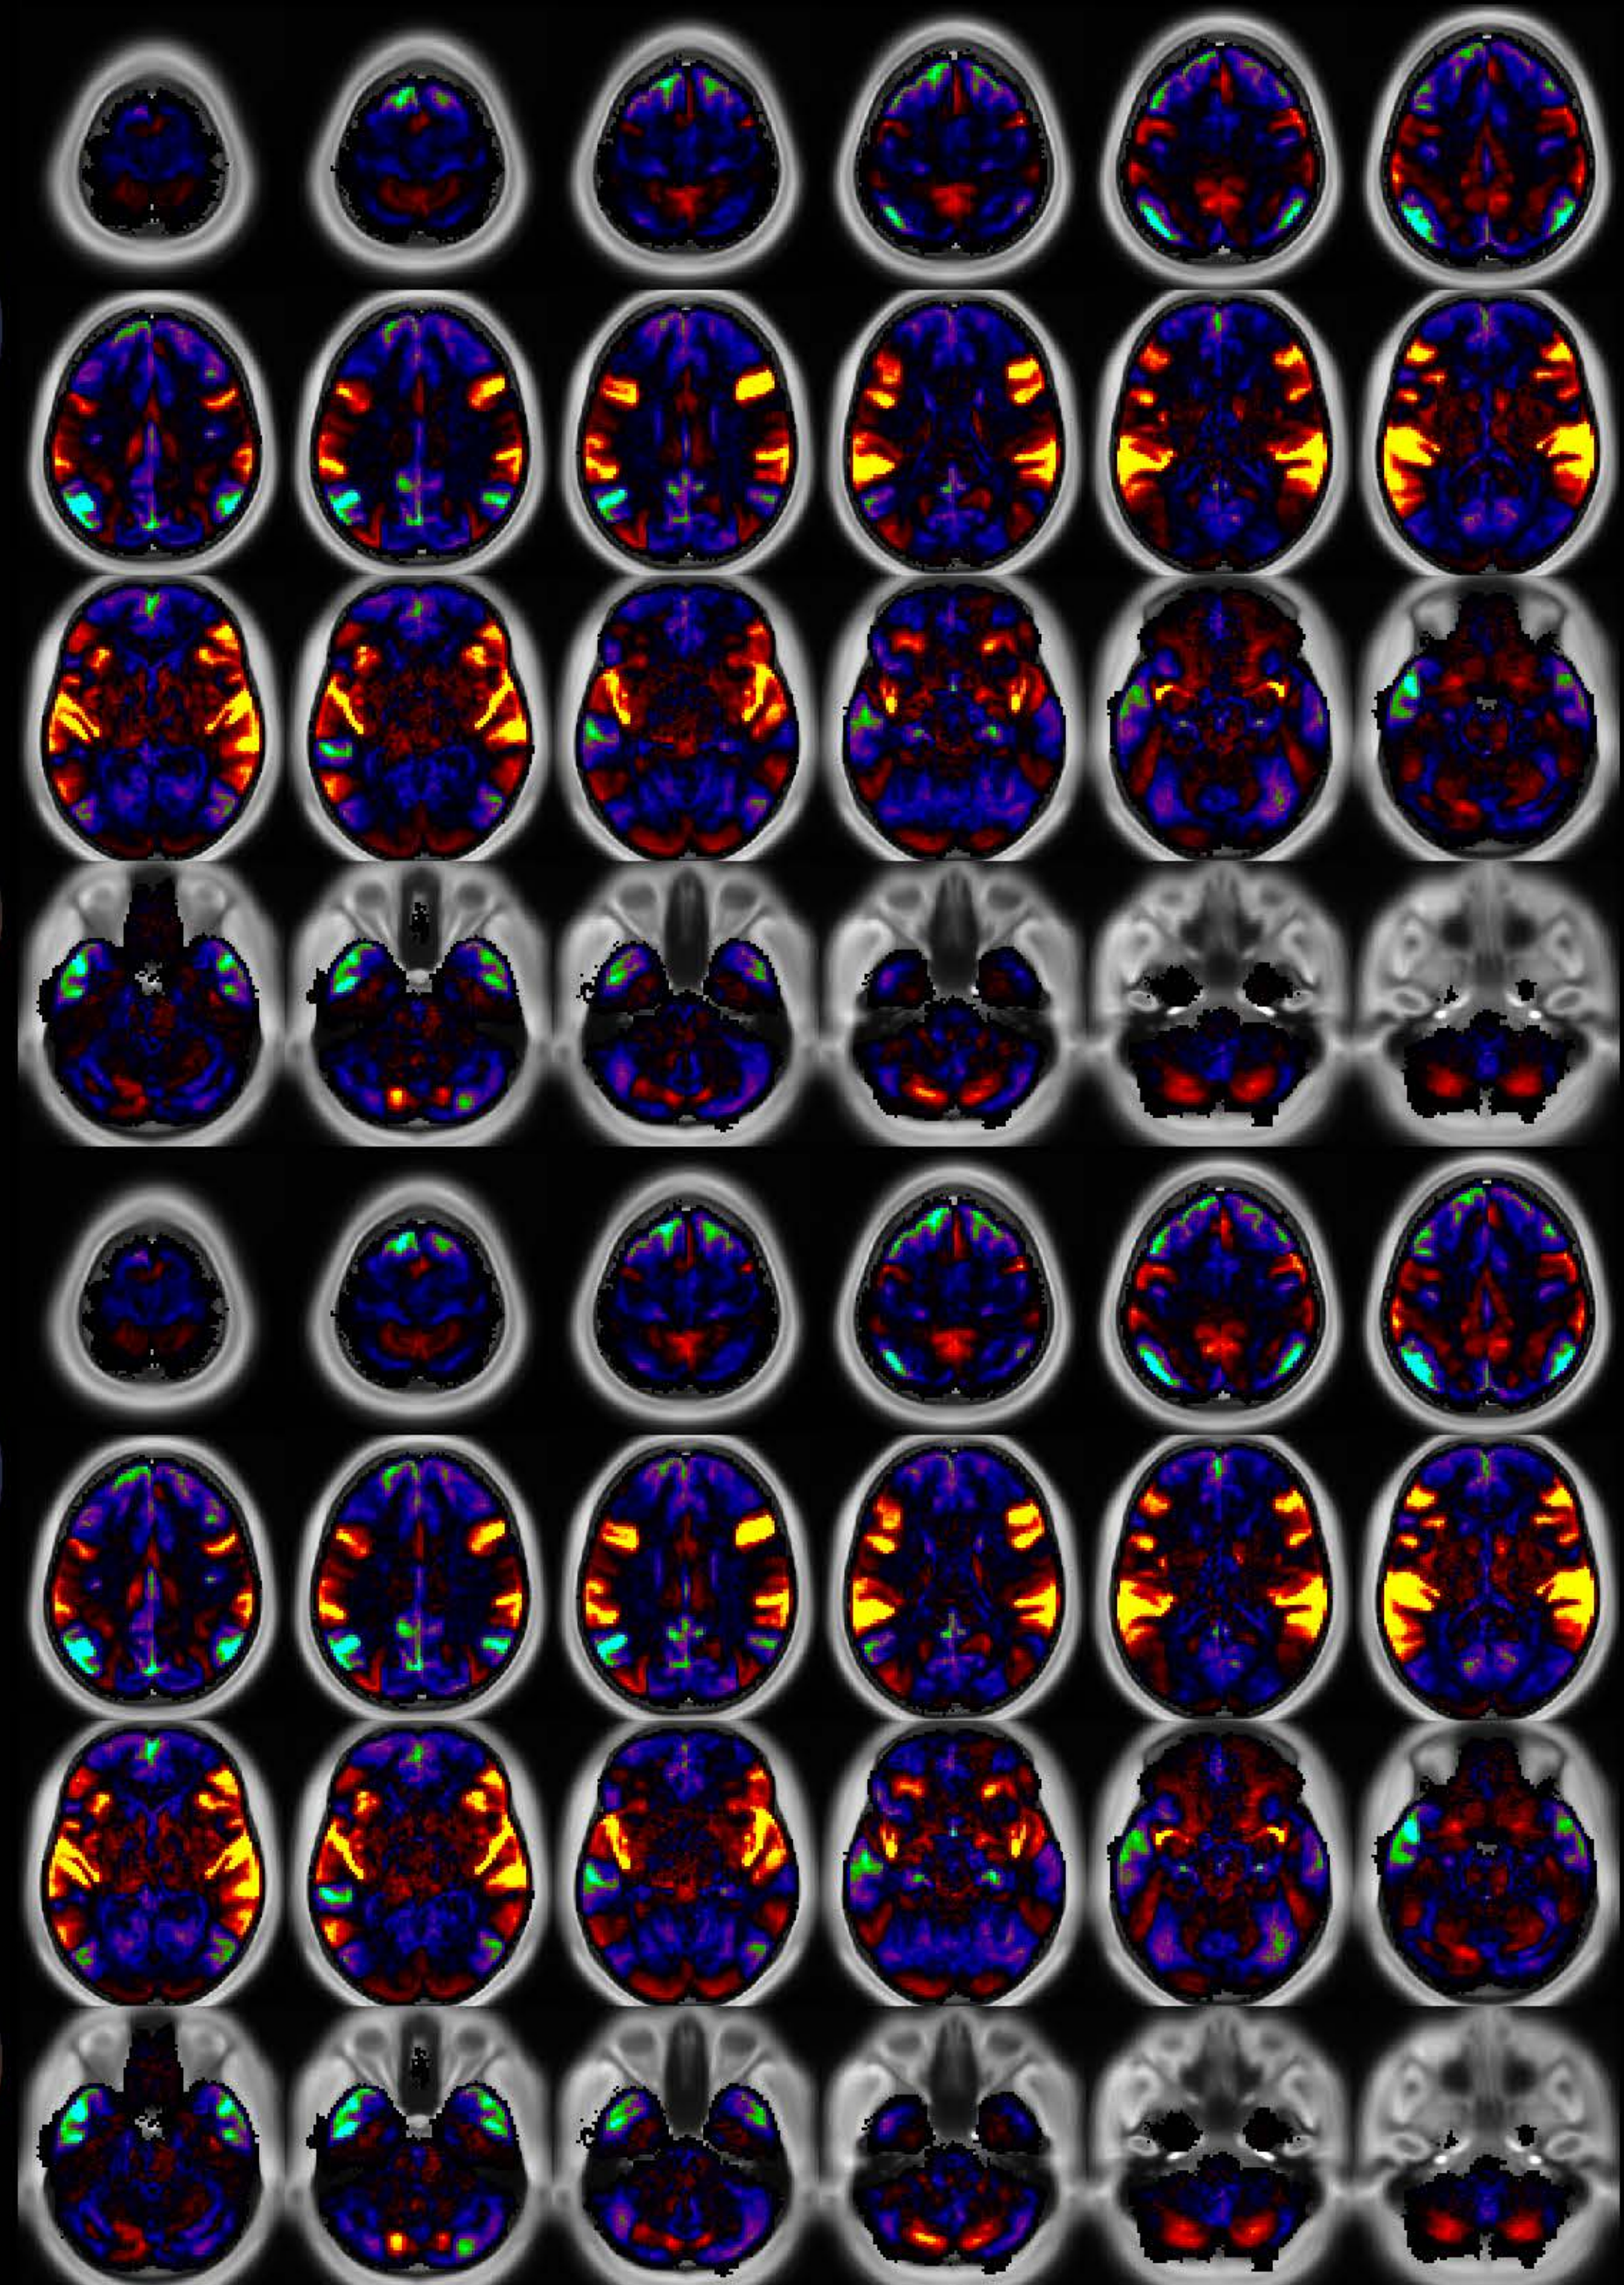

Seconds

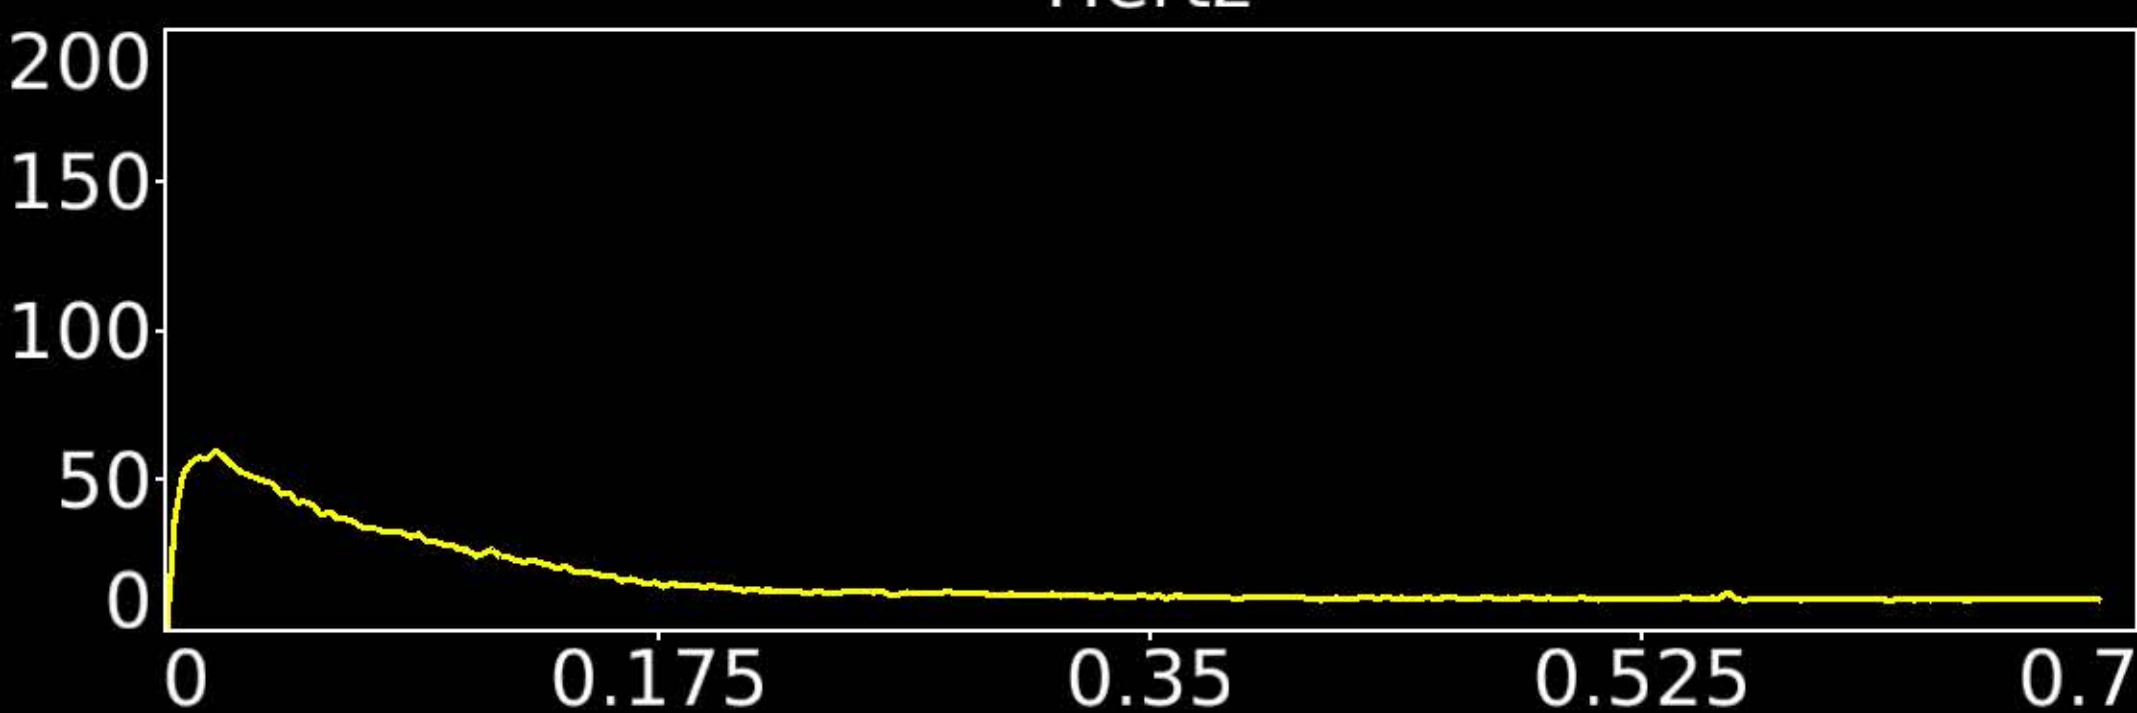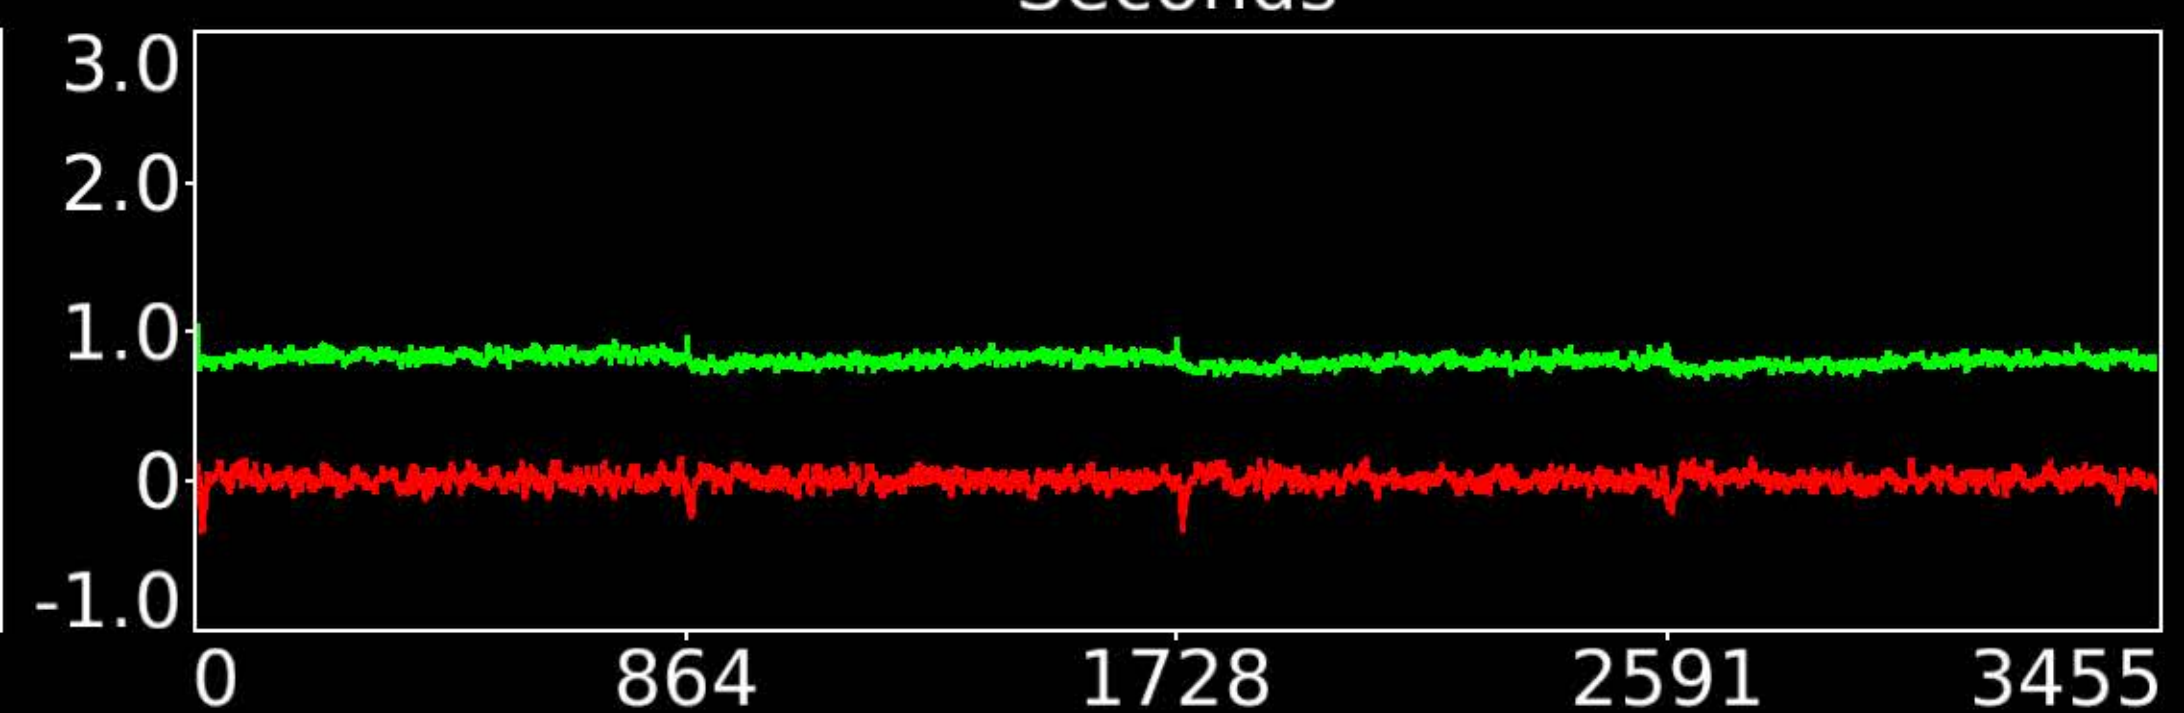

|                                                                                                                                |                            |                            |  |
|--------------------------------------------------------------------------------------------------------------------------------|----------------------------|----------------------------|--|
| Number & Class: 36 Signal                                                                                                      |                            | Name: Auditory Network     |  |
| RVT Correlated: No                                                                                                             | DVARS Dip Associated: No   | Cross-Subject Variable: No |  |
| Single Subject: No                                                                                                             | % Variance Explained: 1.01 | Globality Index: 0.08      |  |
| Task Component: No                                                                                                             | Taskr Component: No        | Sleep Noted: No            |  |
| Rationale: Spatial map includes positive and negative patches that respect known RSNs (e.g. Auditory and Default Mode Network) |                            |                            |  |



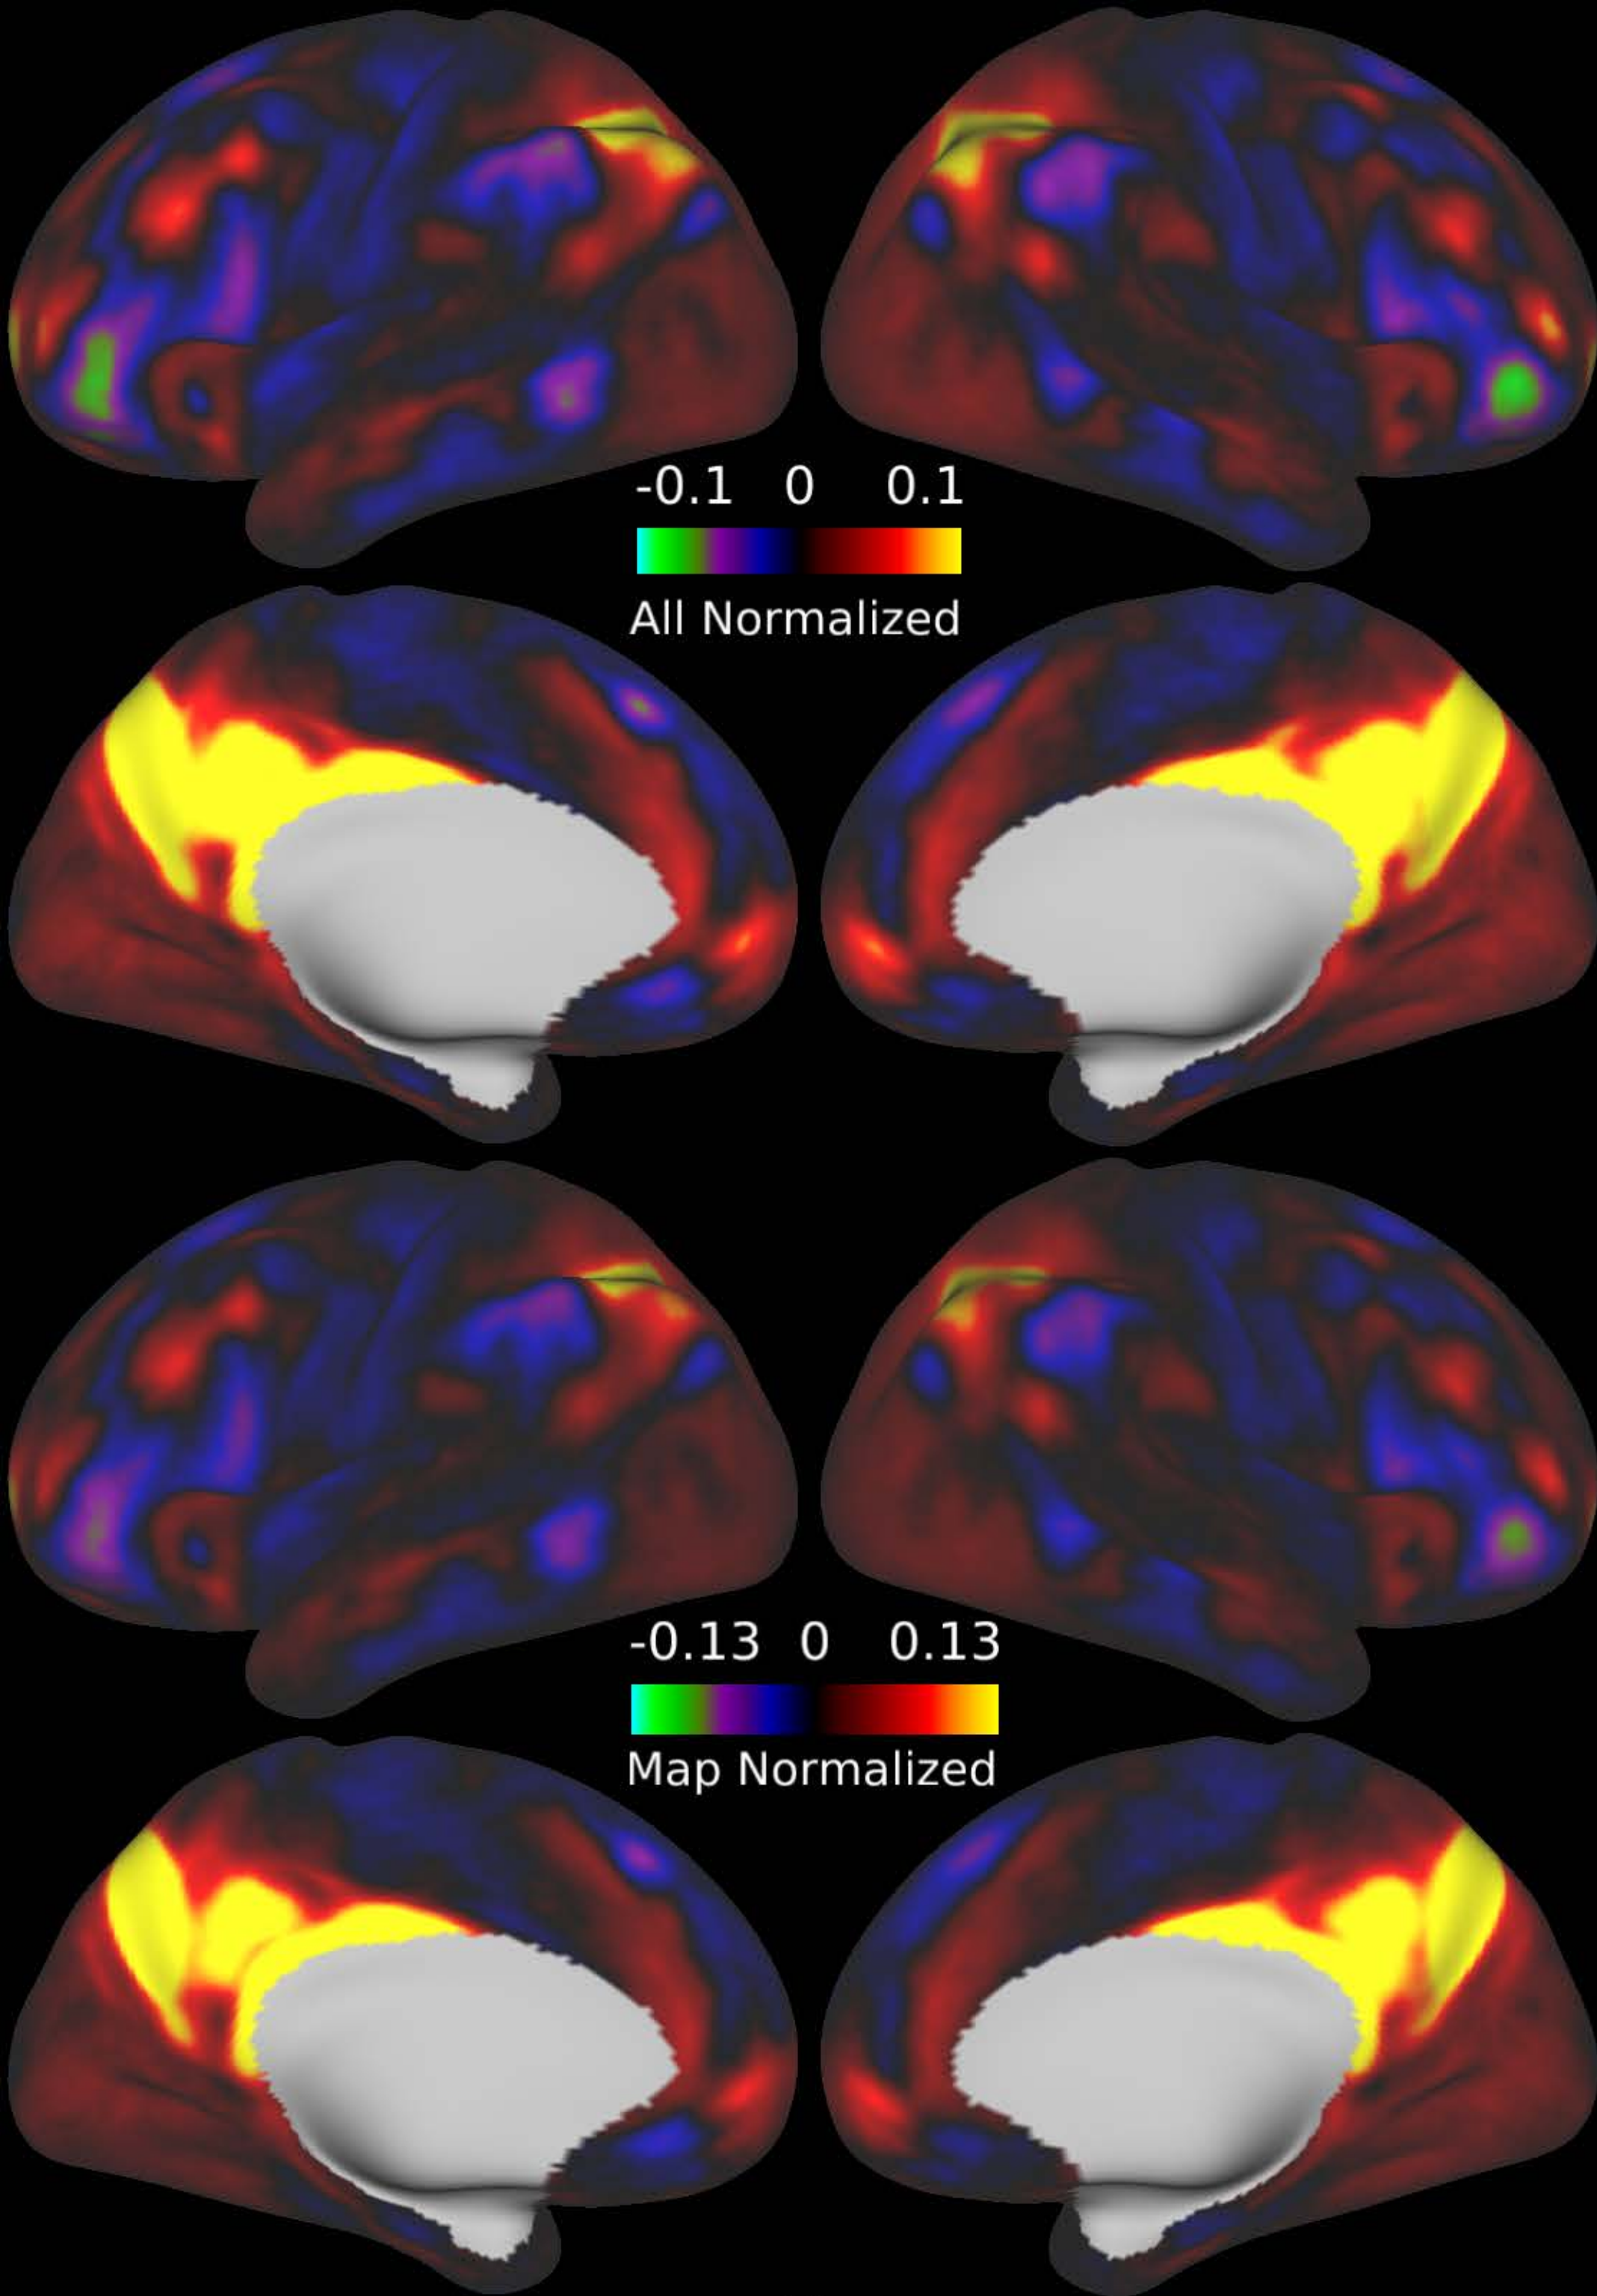

Hertz

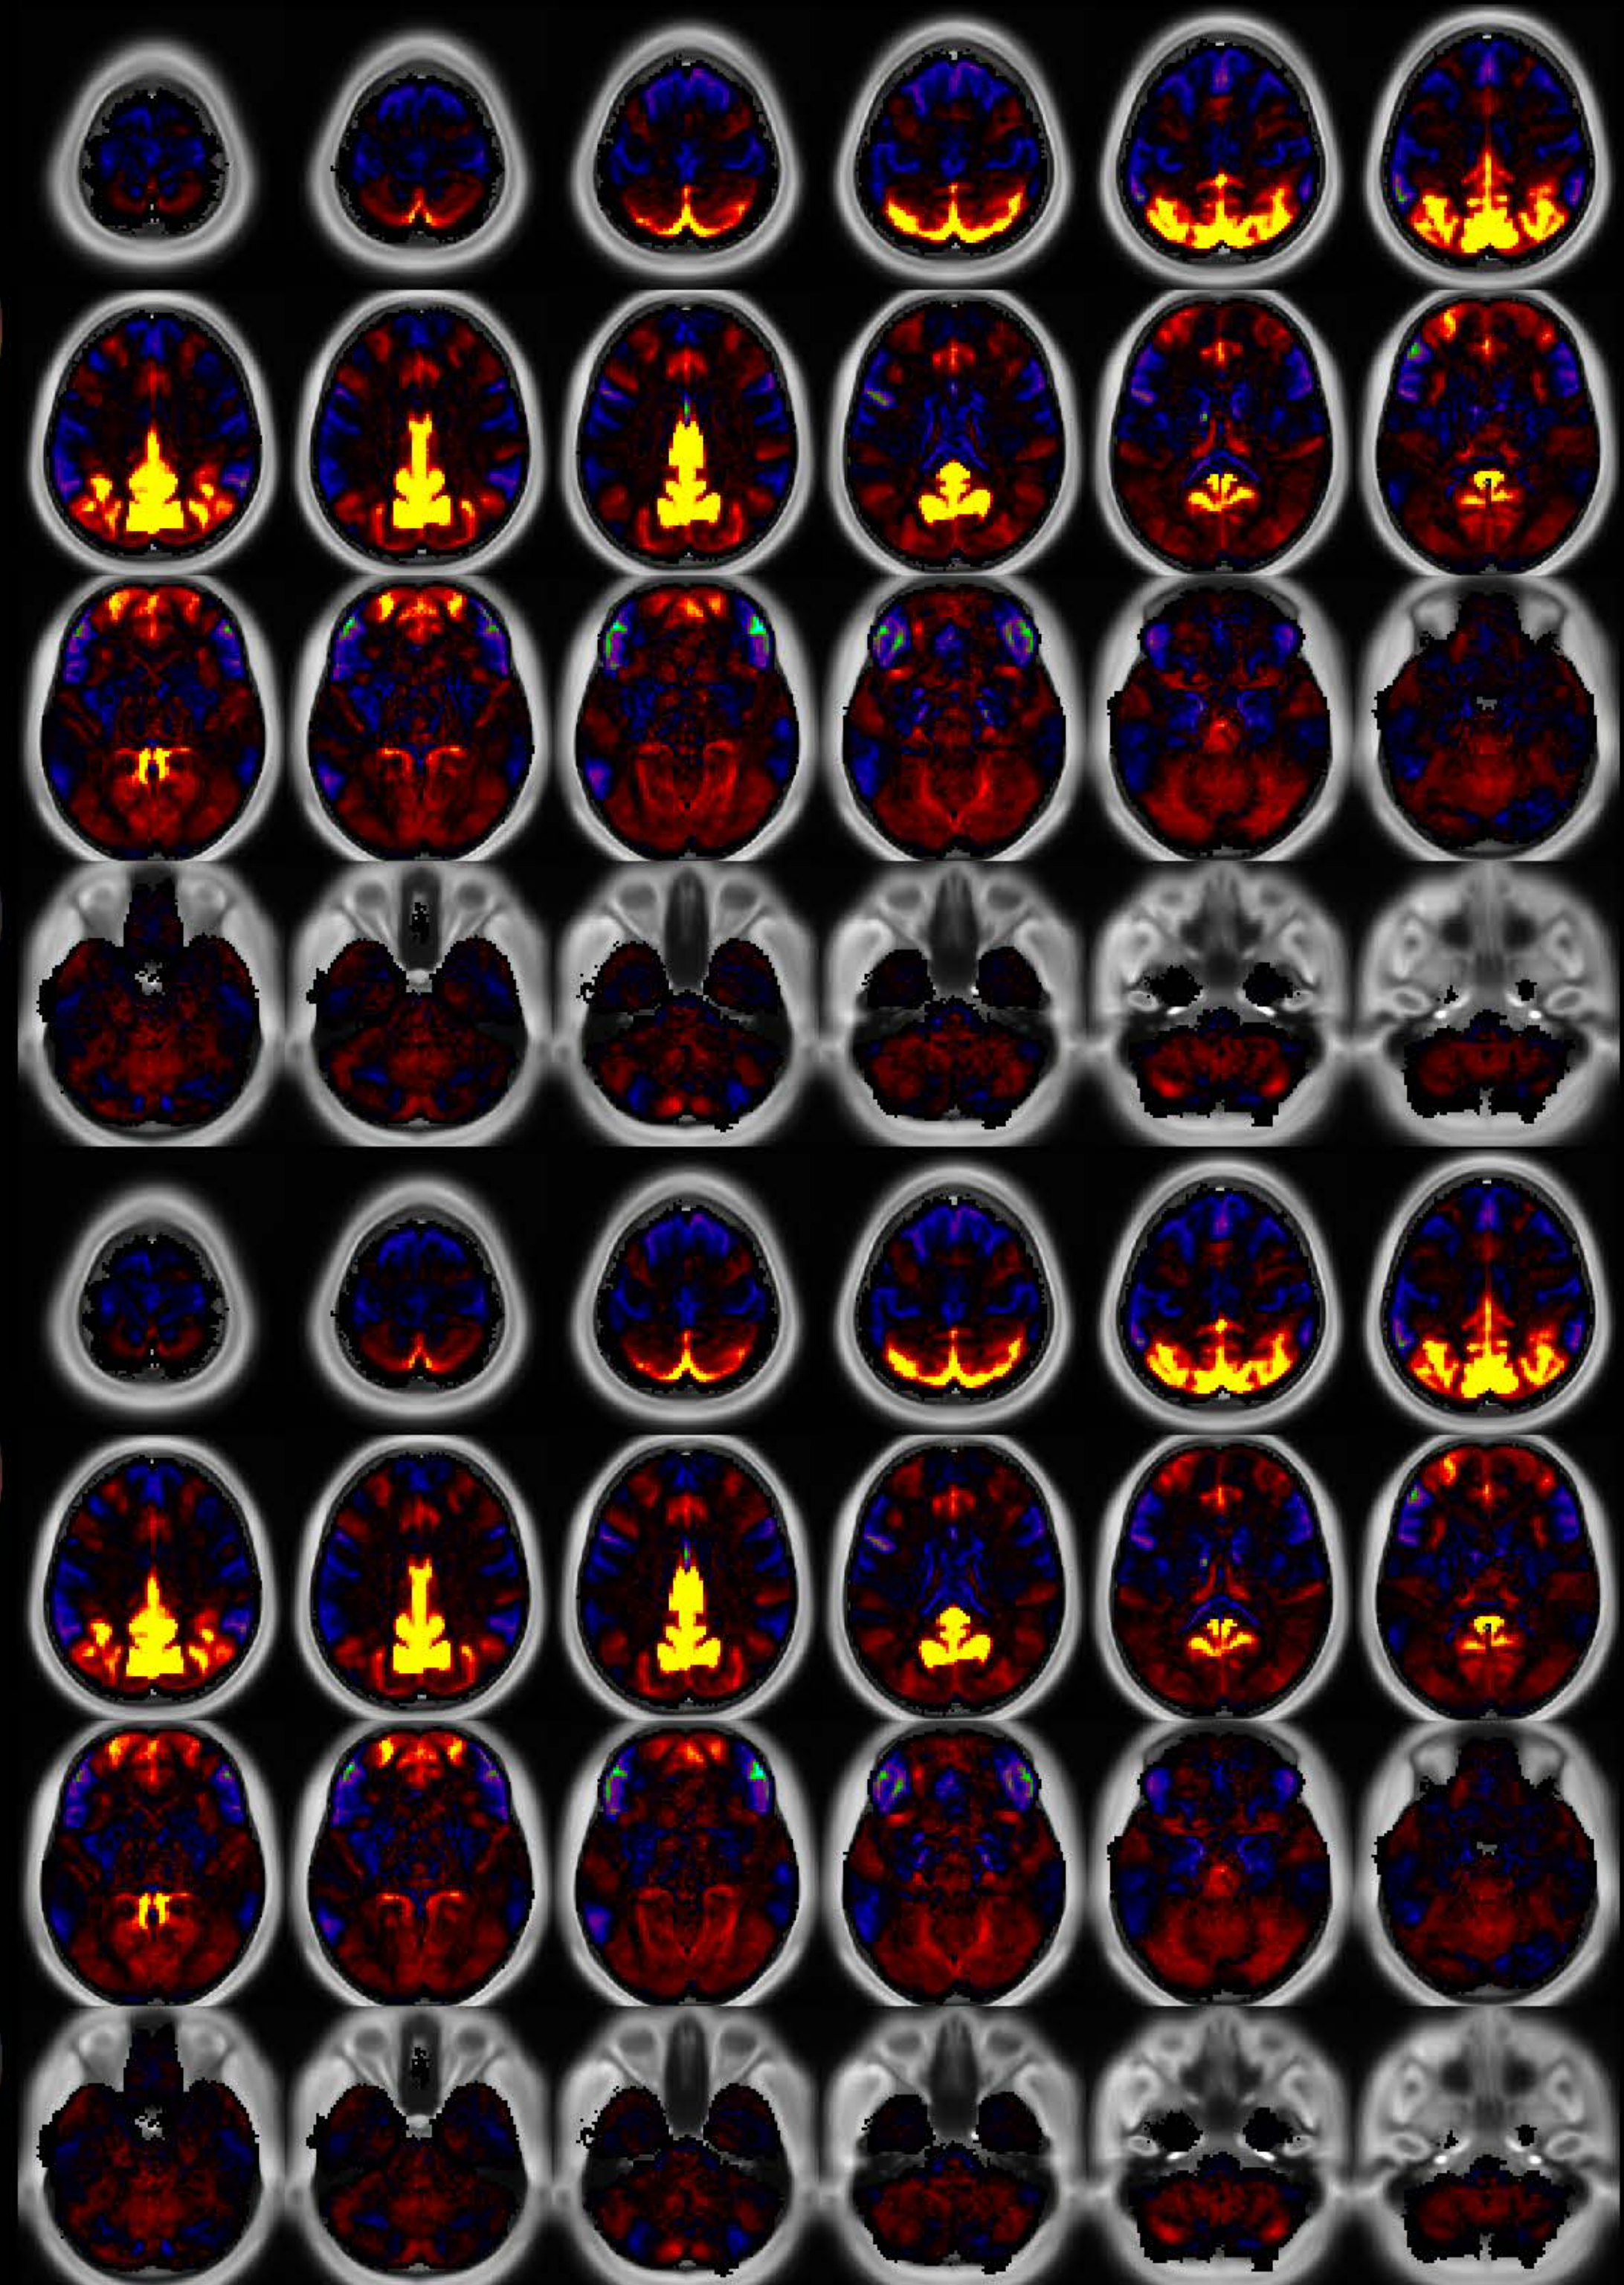

Seconds

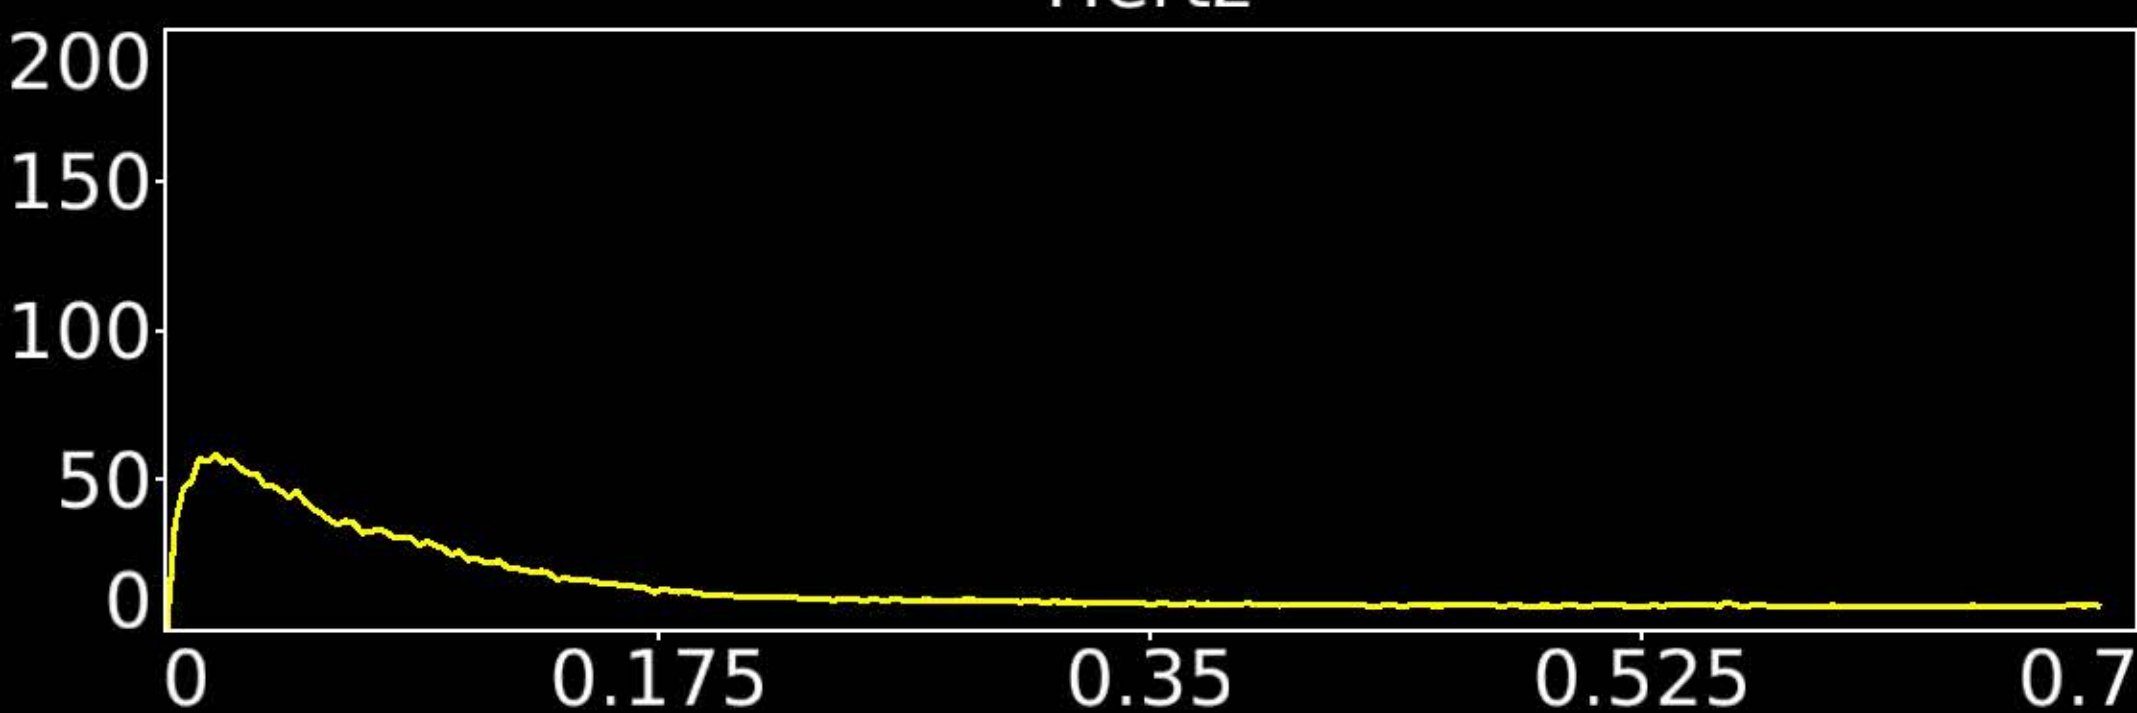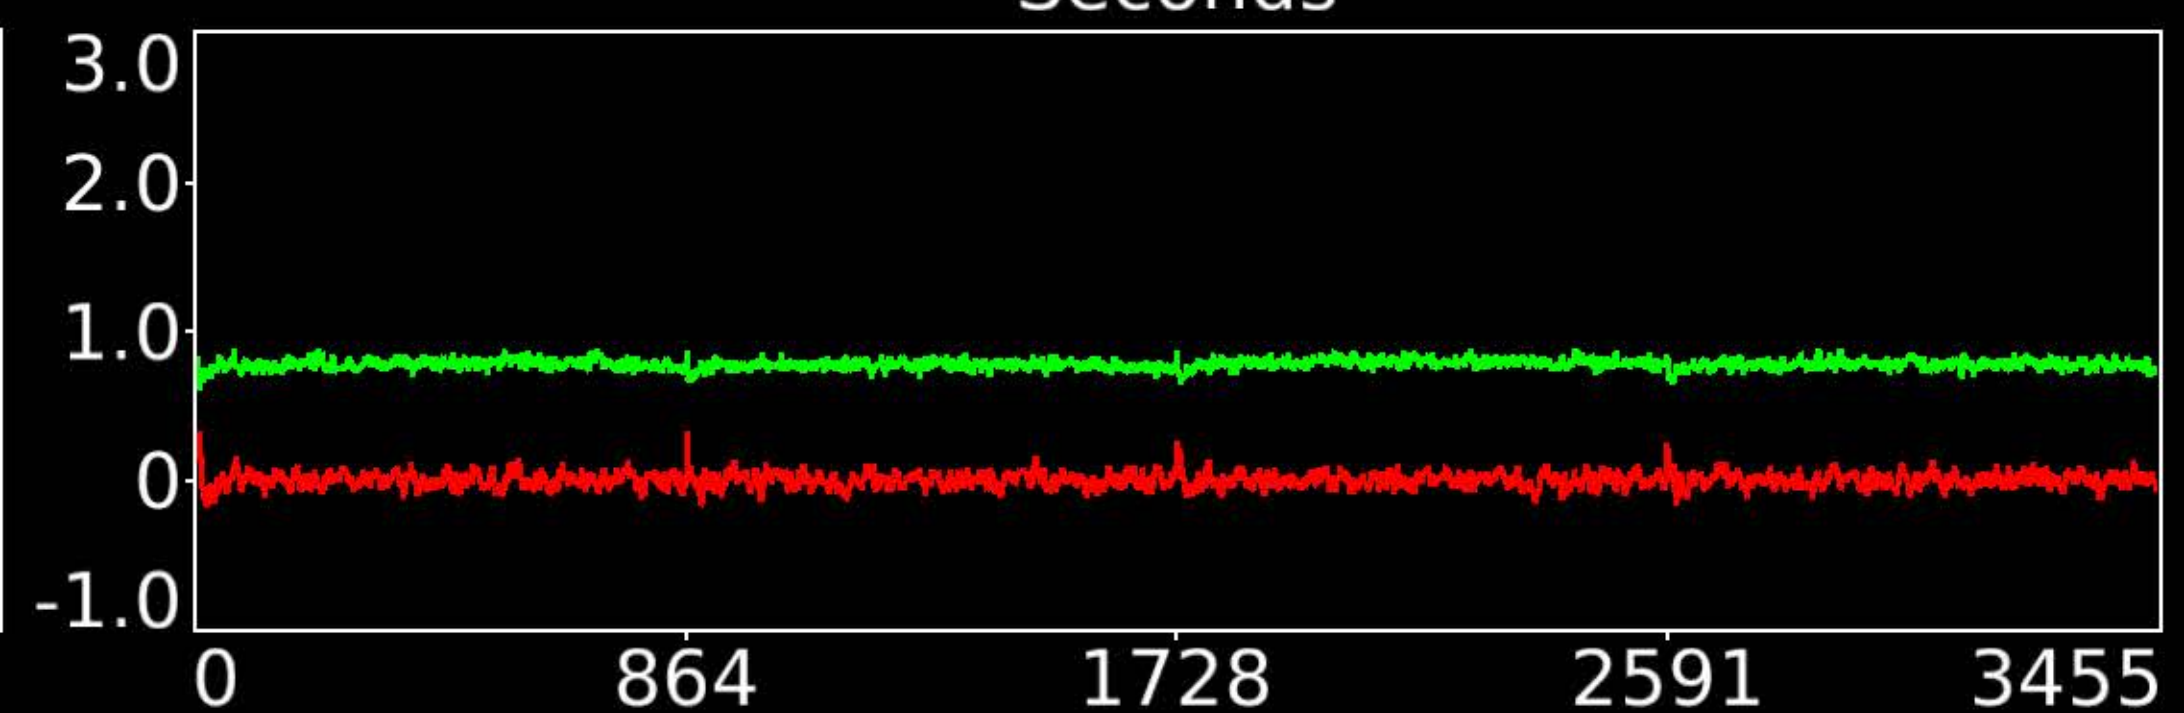

|                           |                            |                            |  |
|---------------------------|----------------------------|----------------------------|--|
| Number & Class: 37 Signal |                            | Name: POS2 + RSC Network   |  |
| RVT Correlated: No        | DVARS Dip Associated: No   | Cross-Subject Variable: No |  |
| Single Subject: No        | % Variance Explained: 0.94 | Globality Index: 0.93      |  |
| Task Component: 13        | Taskr Component: 21        | Sleep Noted: No            |  |

Rationale: Spatial map includes positive and negative patches that respect known RSNs (e.g. Medial Parietal Network)



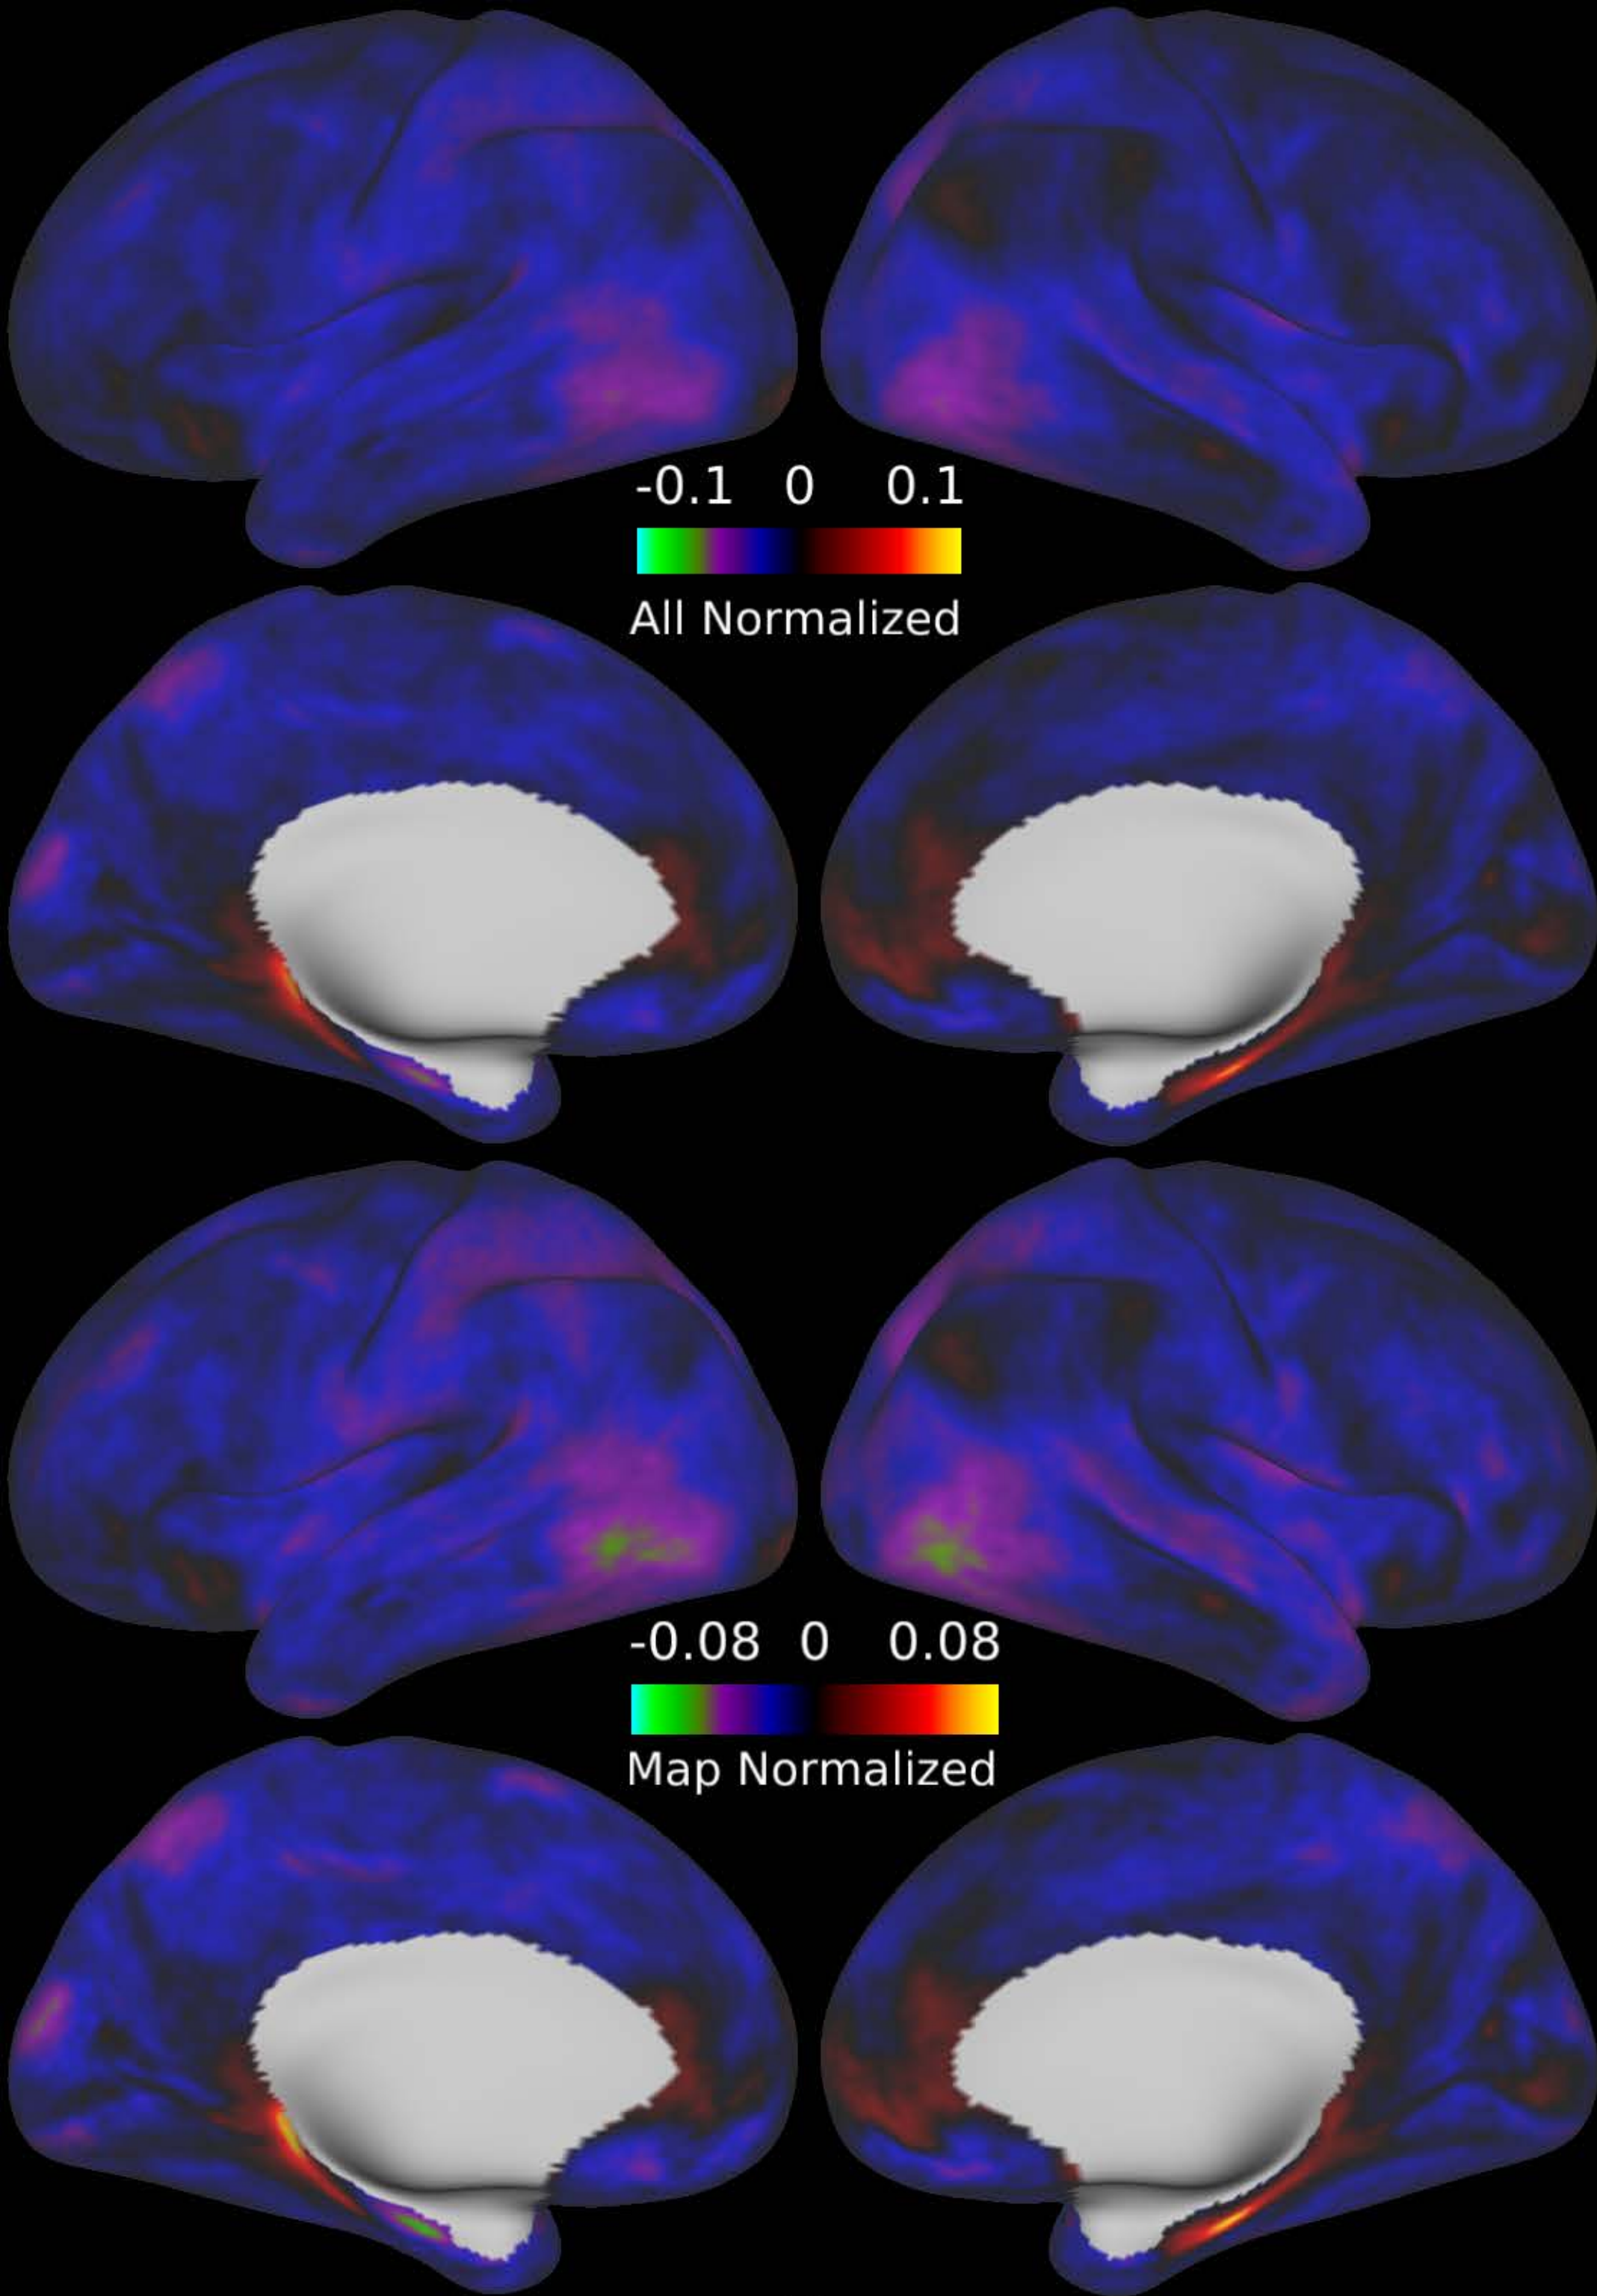

Hertz

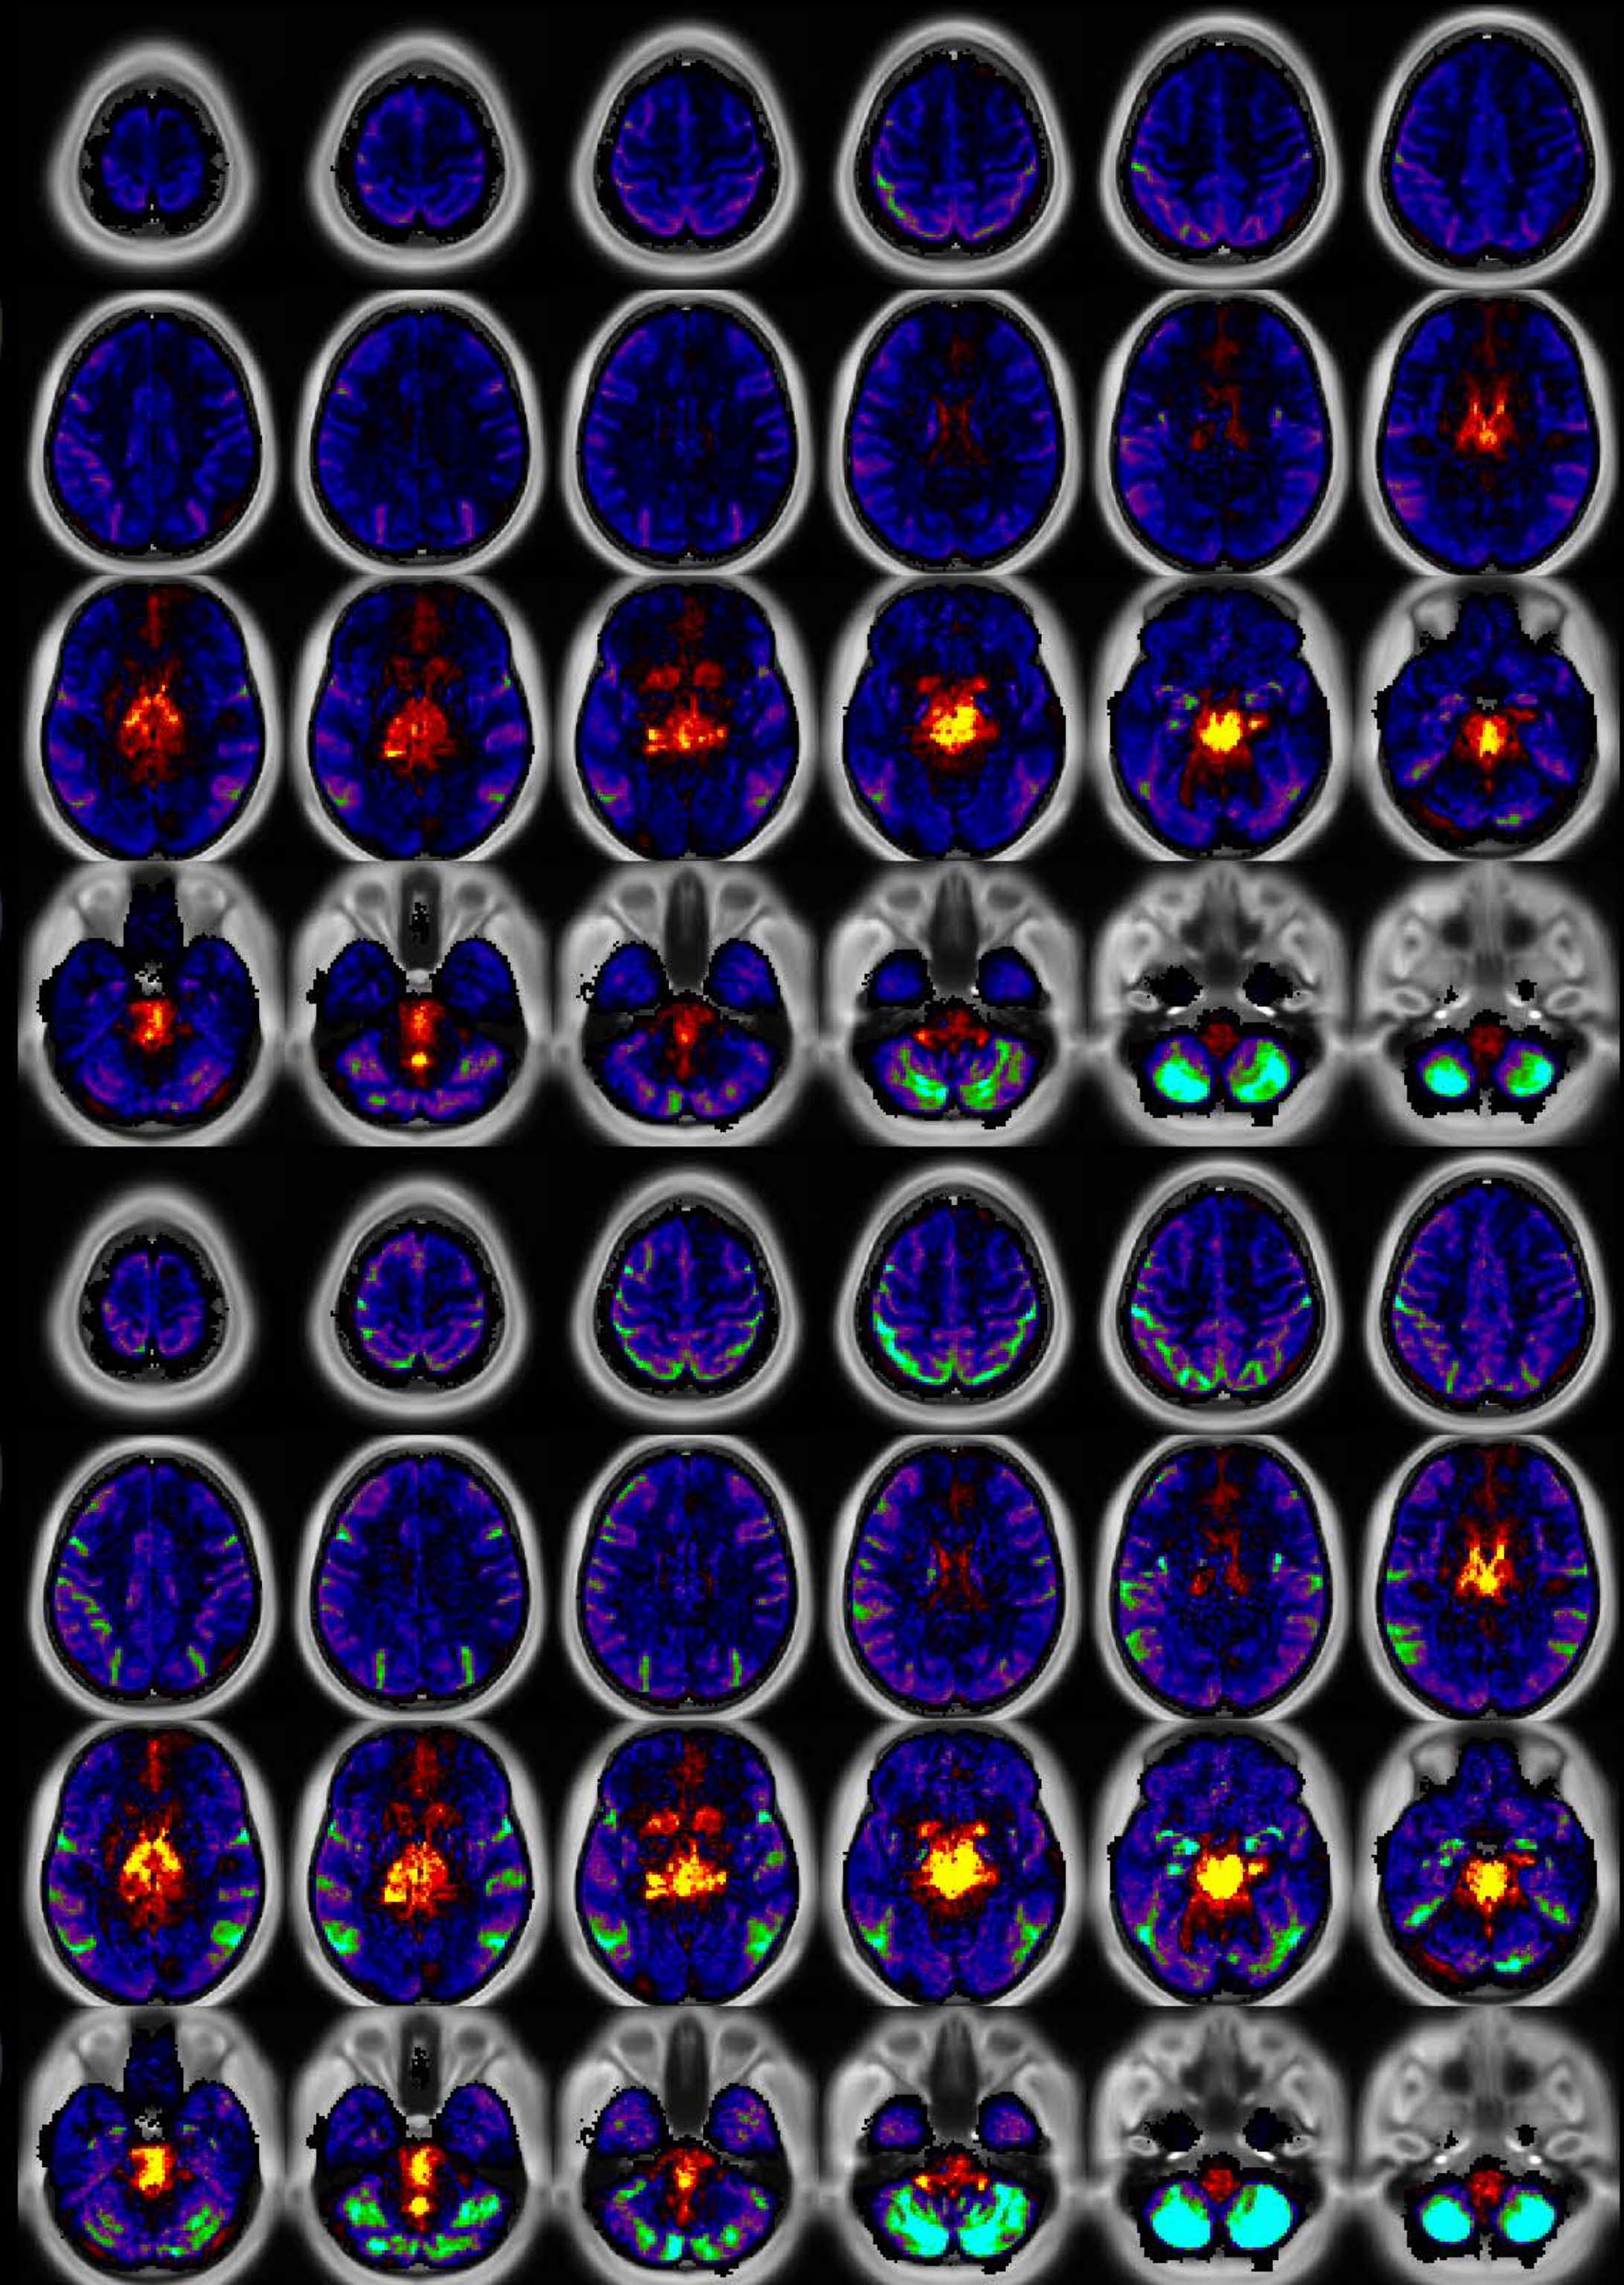

Seconds

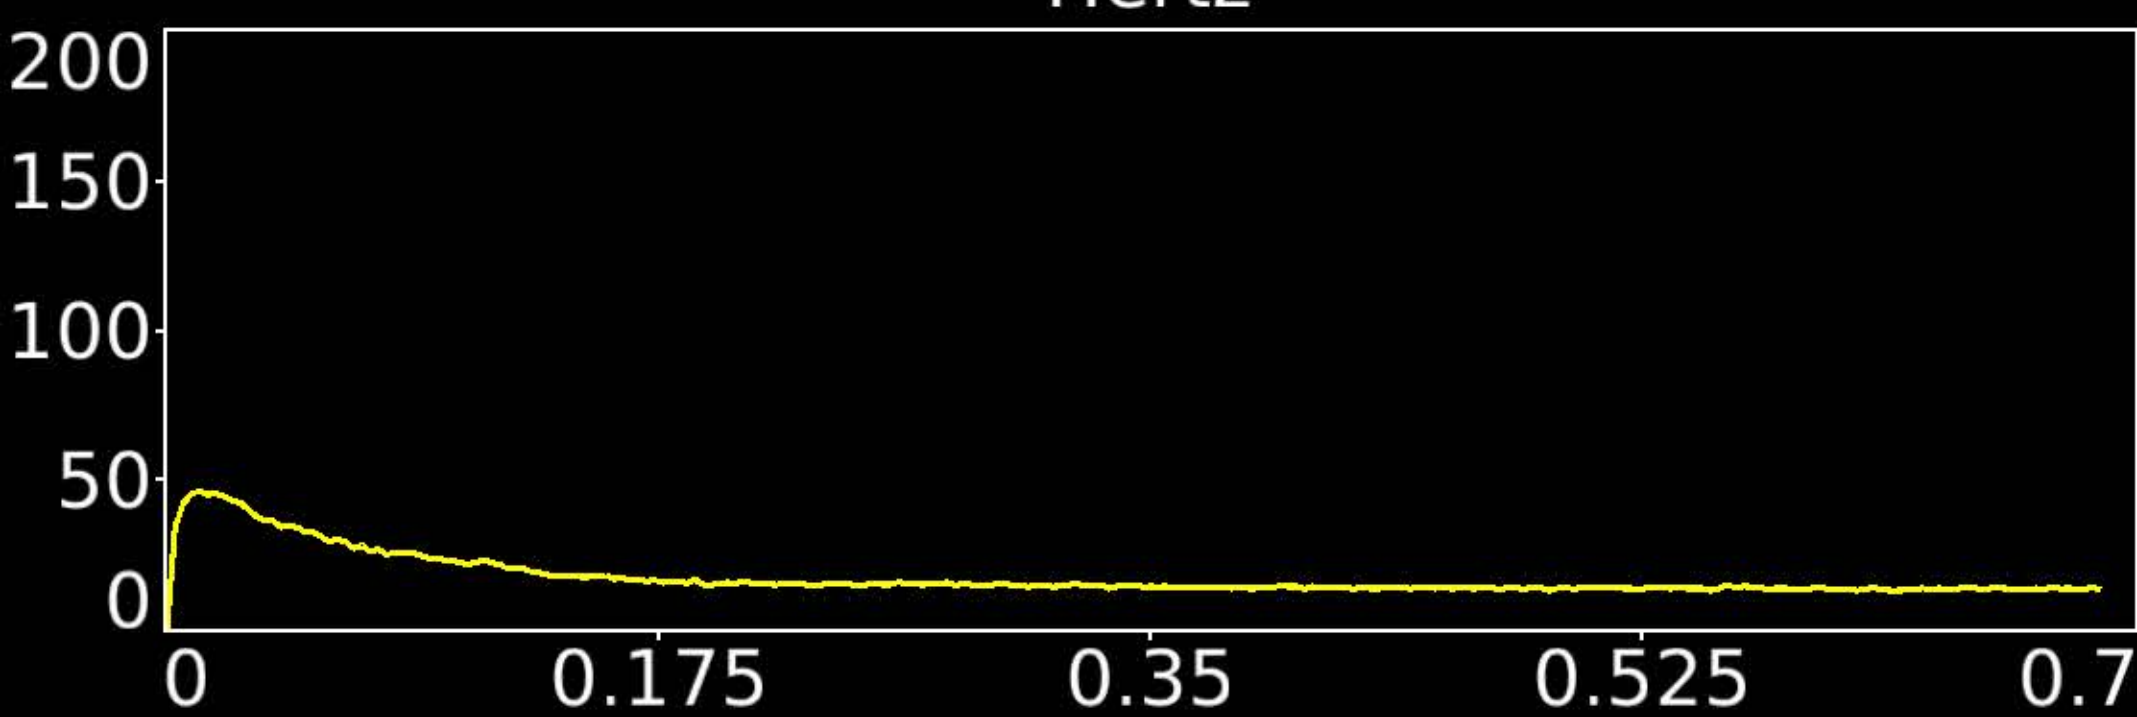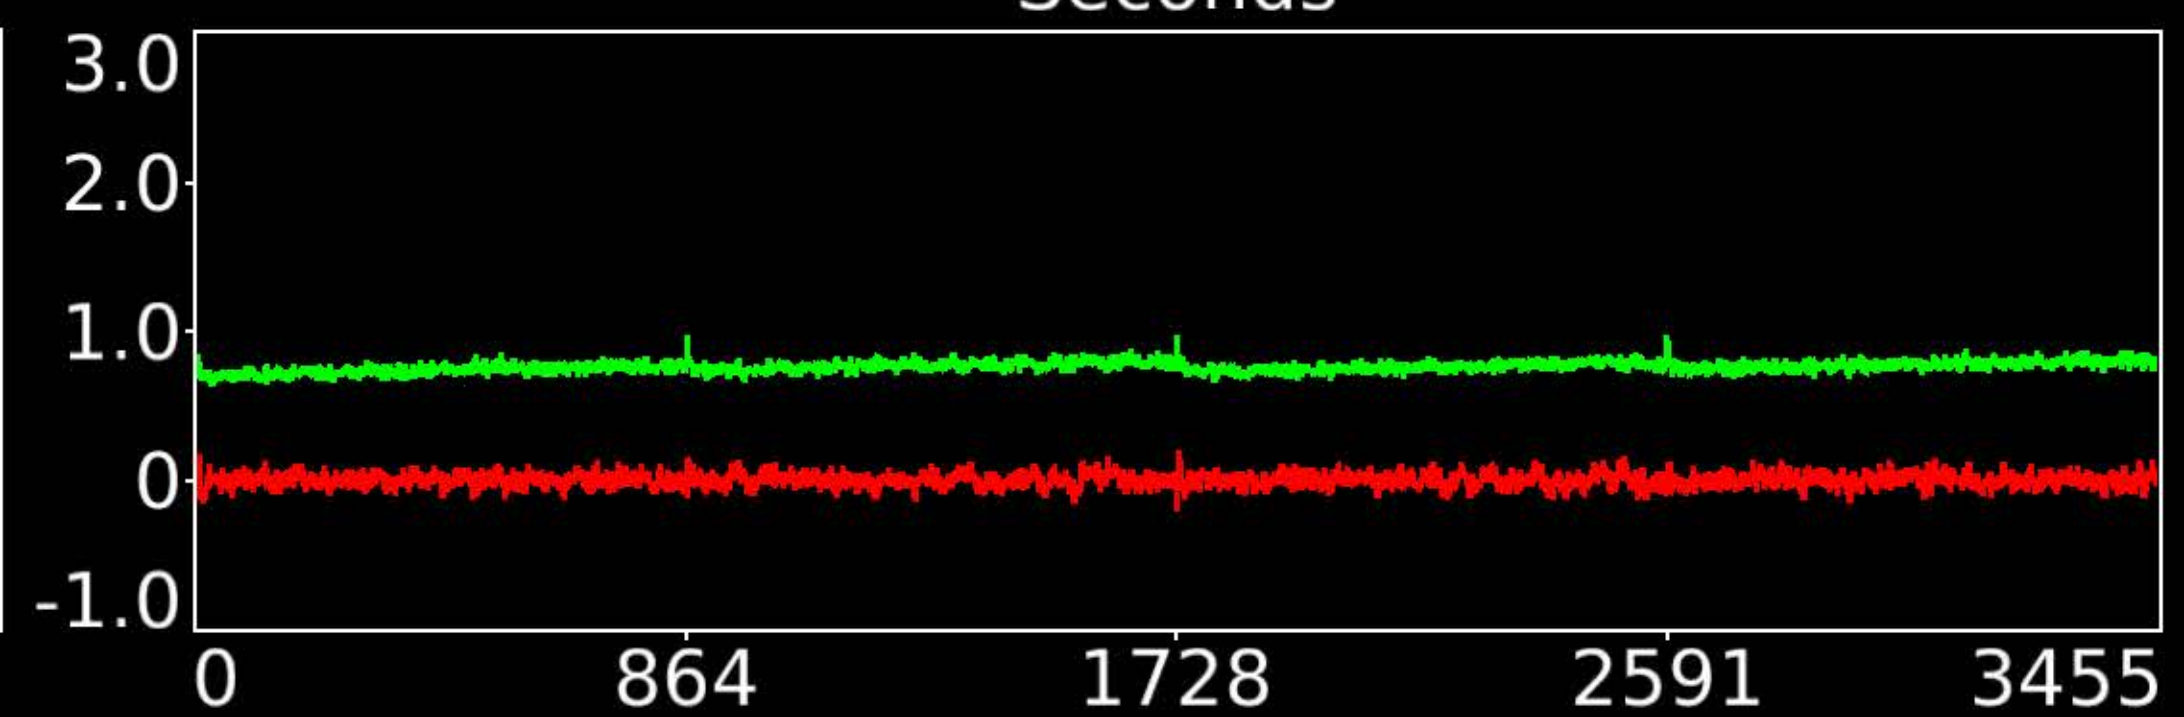

|                                                                                          |                            |                                              |  |
|------------------------------------------------------------------------------------------|----------------------------|----------------------------------------------|--|
| Number & Class: 38 Noise                                                                 |                            | Name: Pons > Inferior Cerebellum DVARS Assoc |  |
| RVT Correlated: No                                                                       | DVARS Dip Associated: Yes  | Cross-Subject Variable: No                   |  |
| Single Subject: No                                                                       | % Variance Explained: 0.89 | Globality Index: 2.15                        |  |
| Task Component: No                                                                       | Taskr Component: No        | Sleep Noted: No                              |  |
| Rationale: Spatial map not reflective of known areas or RSNs; associated with DVARS Dips |                            |                                              |  |



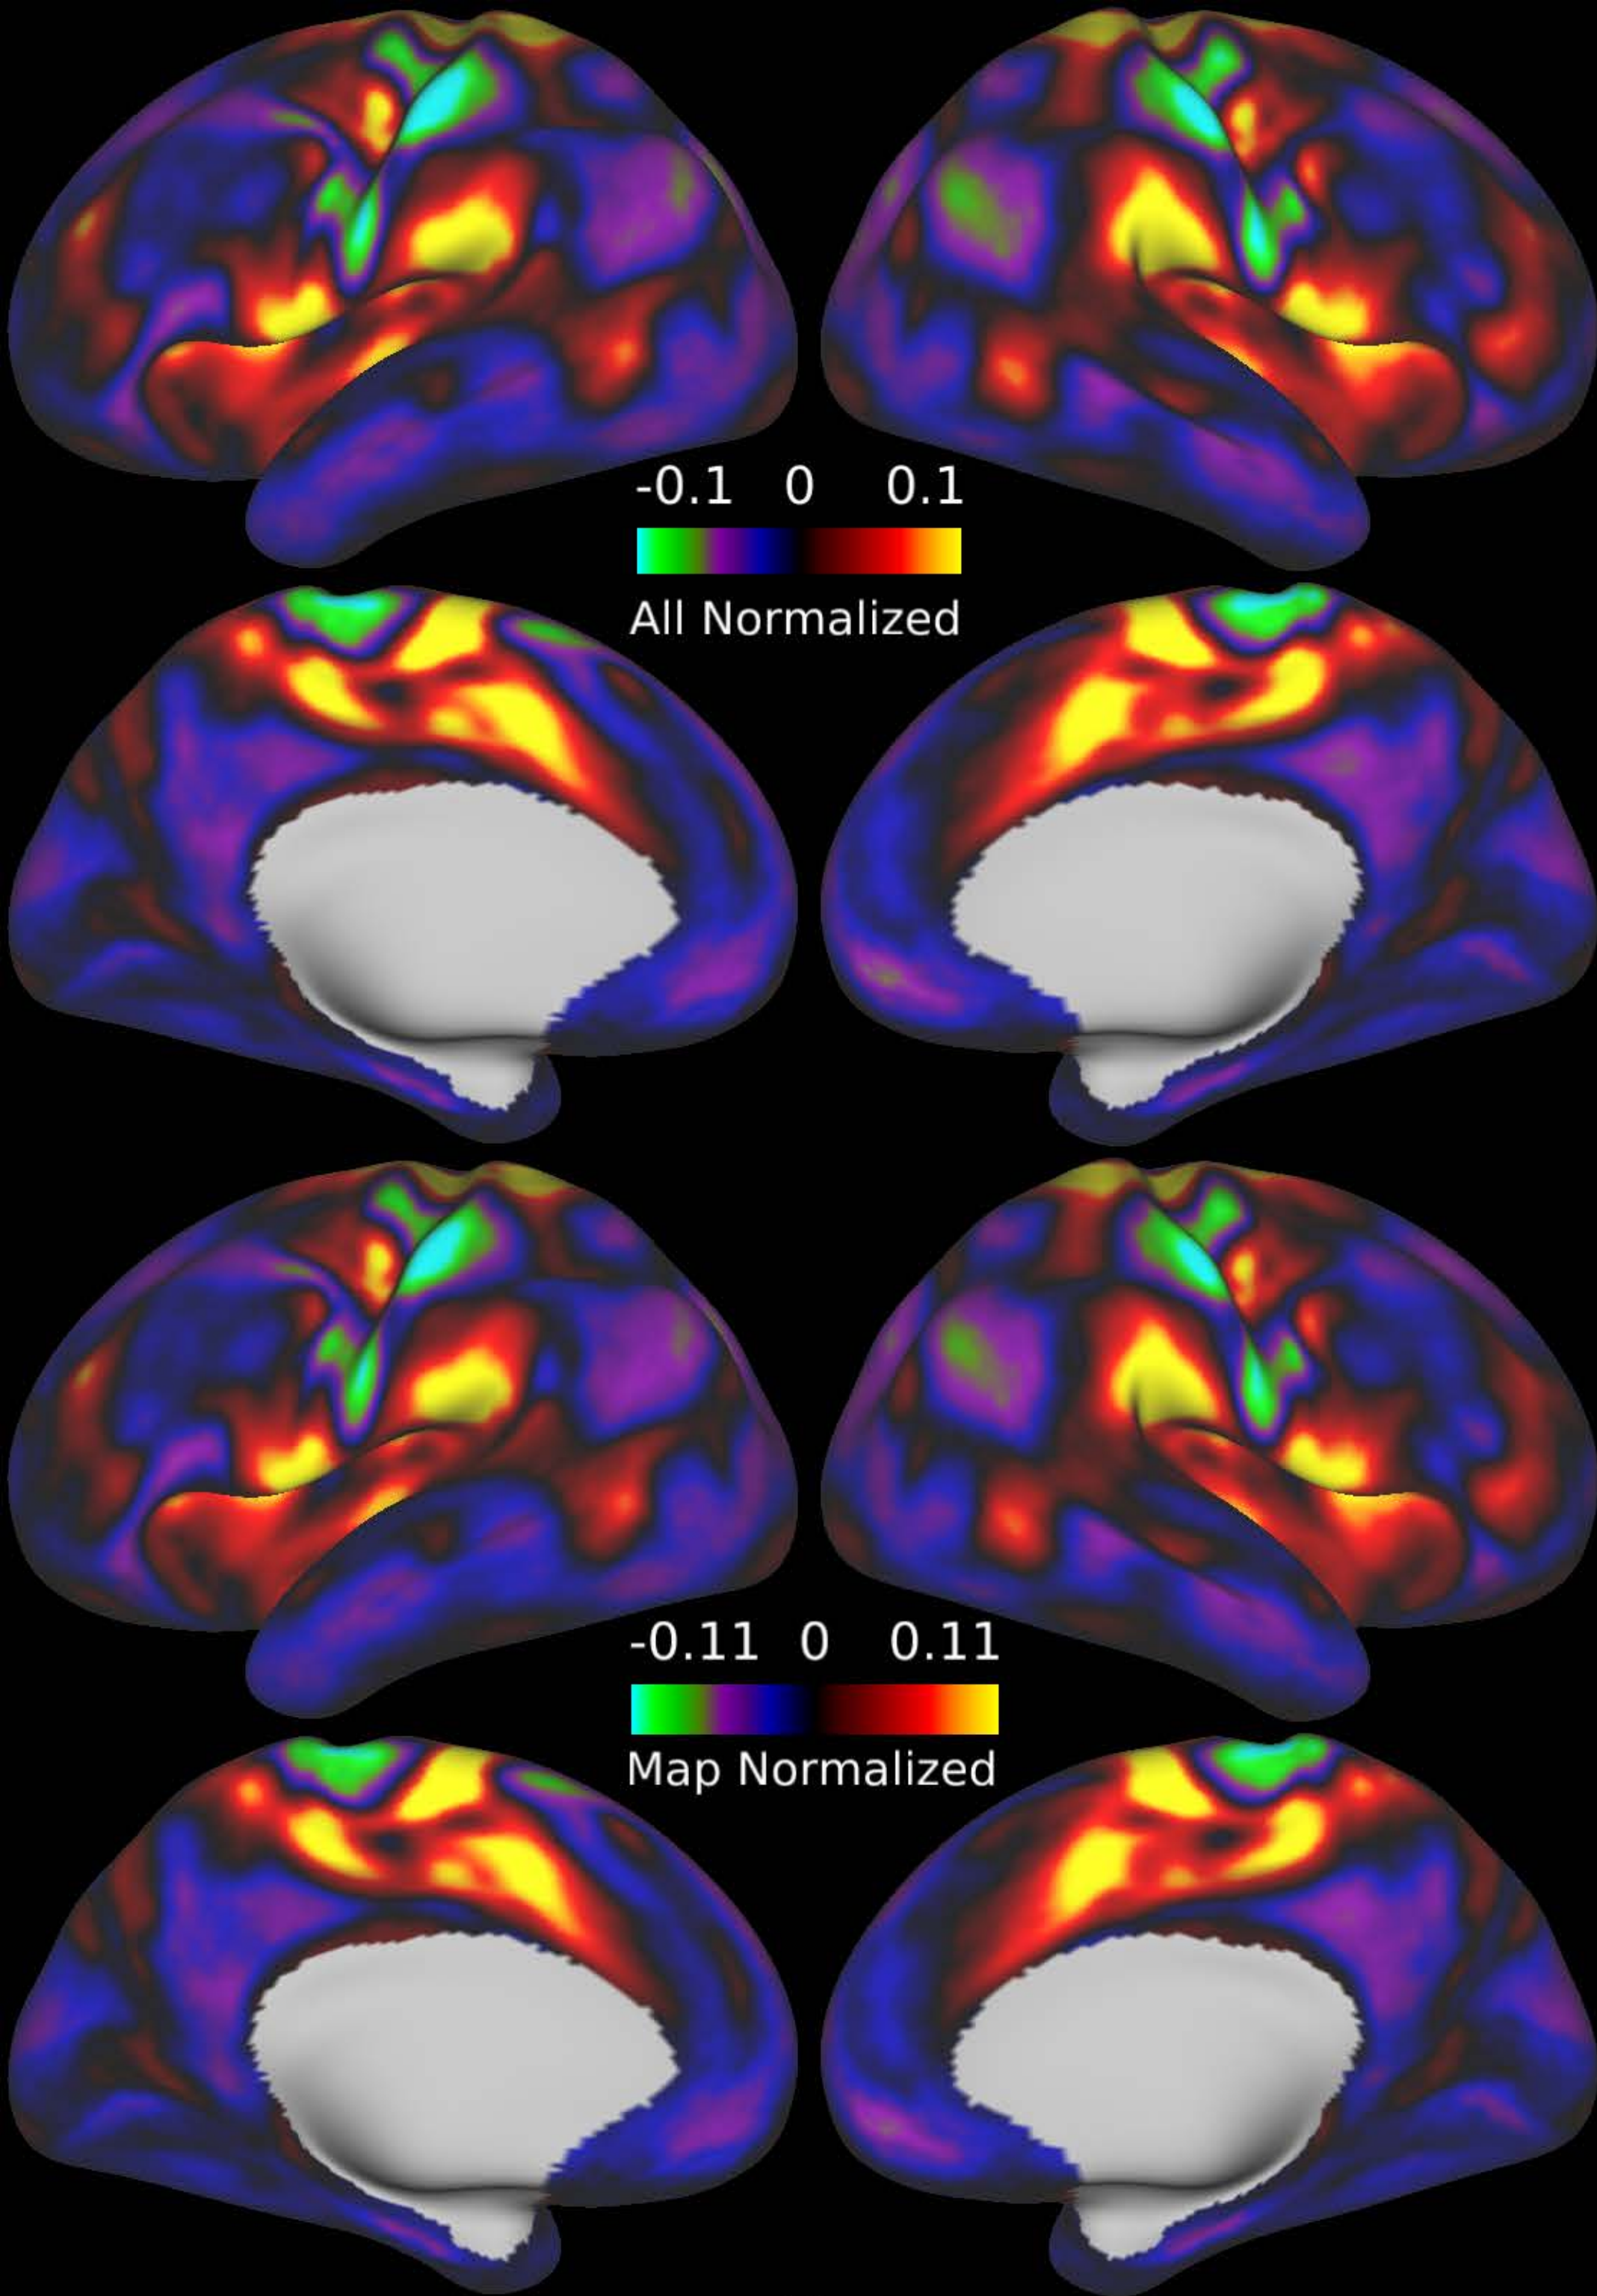

Hertz

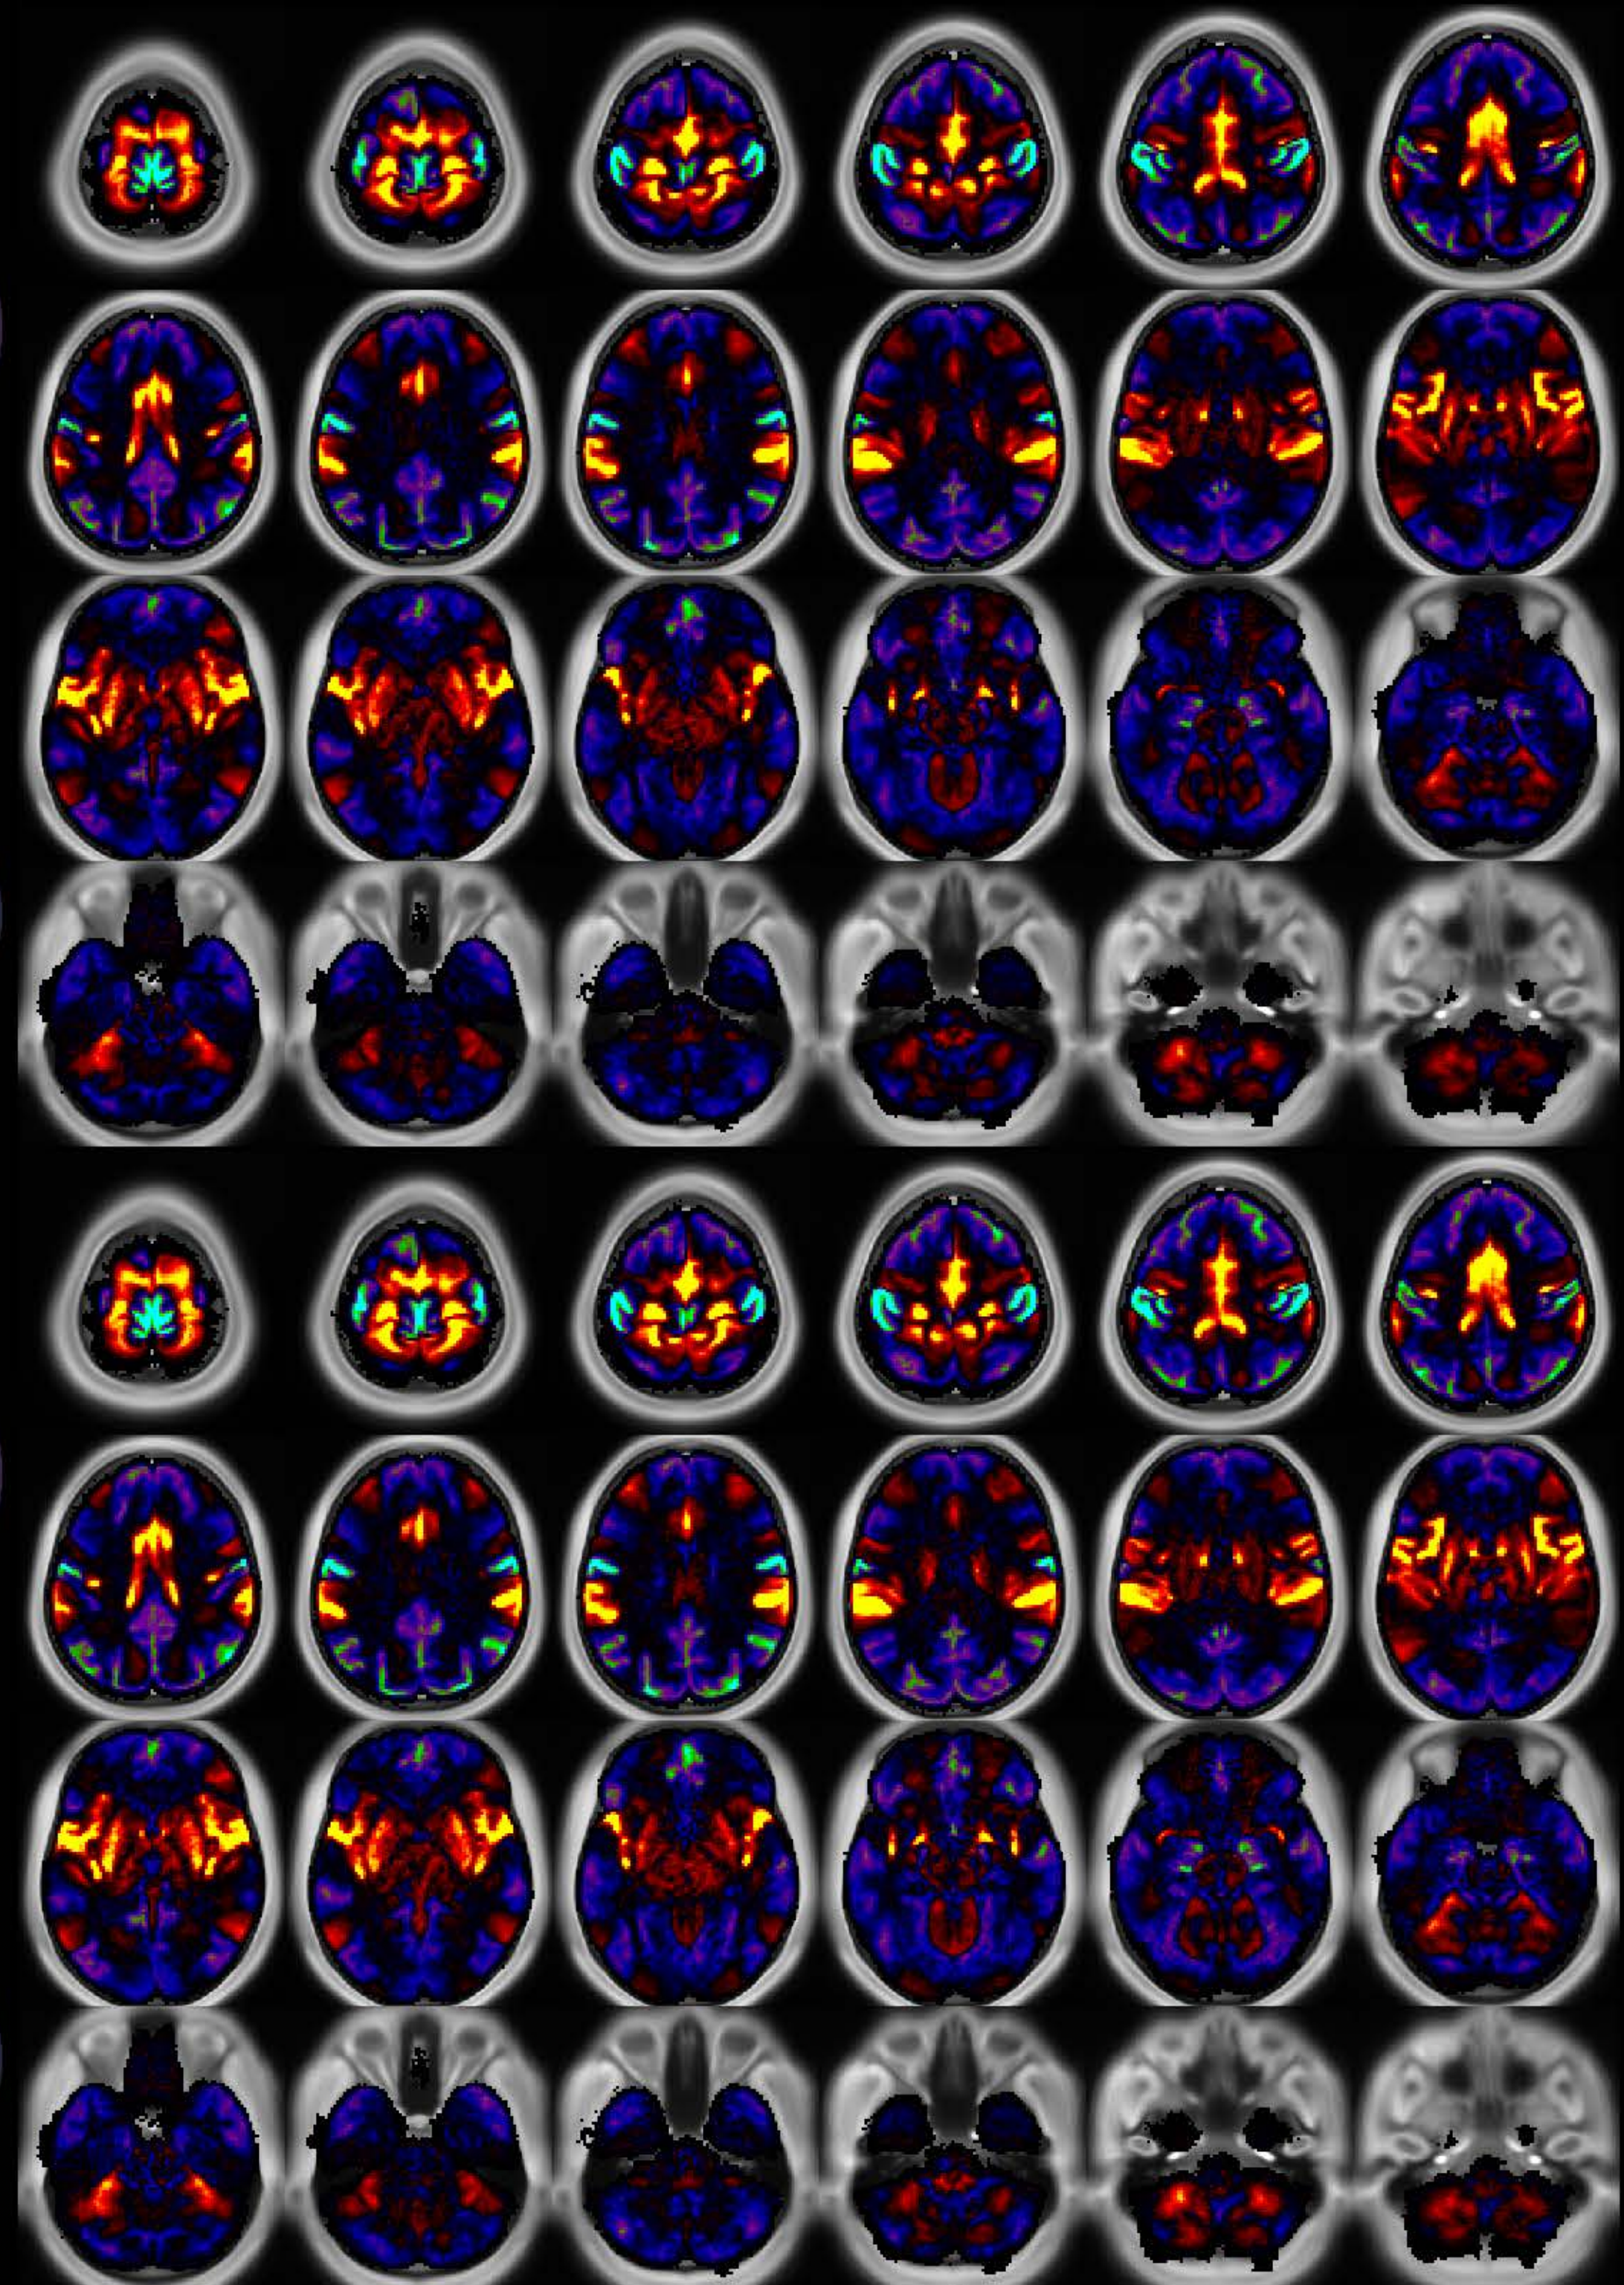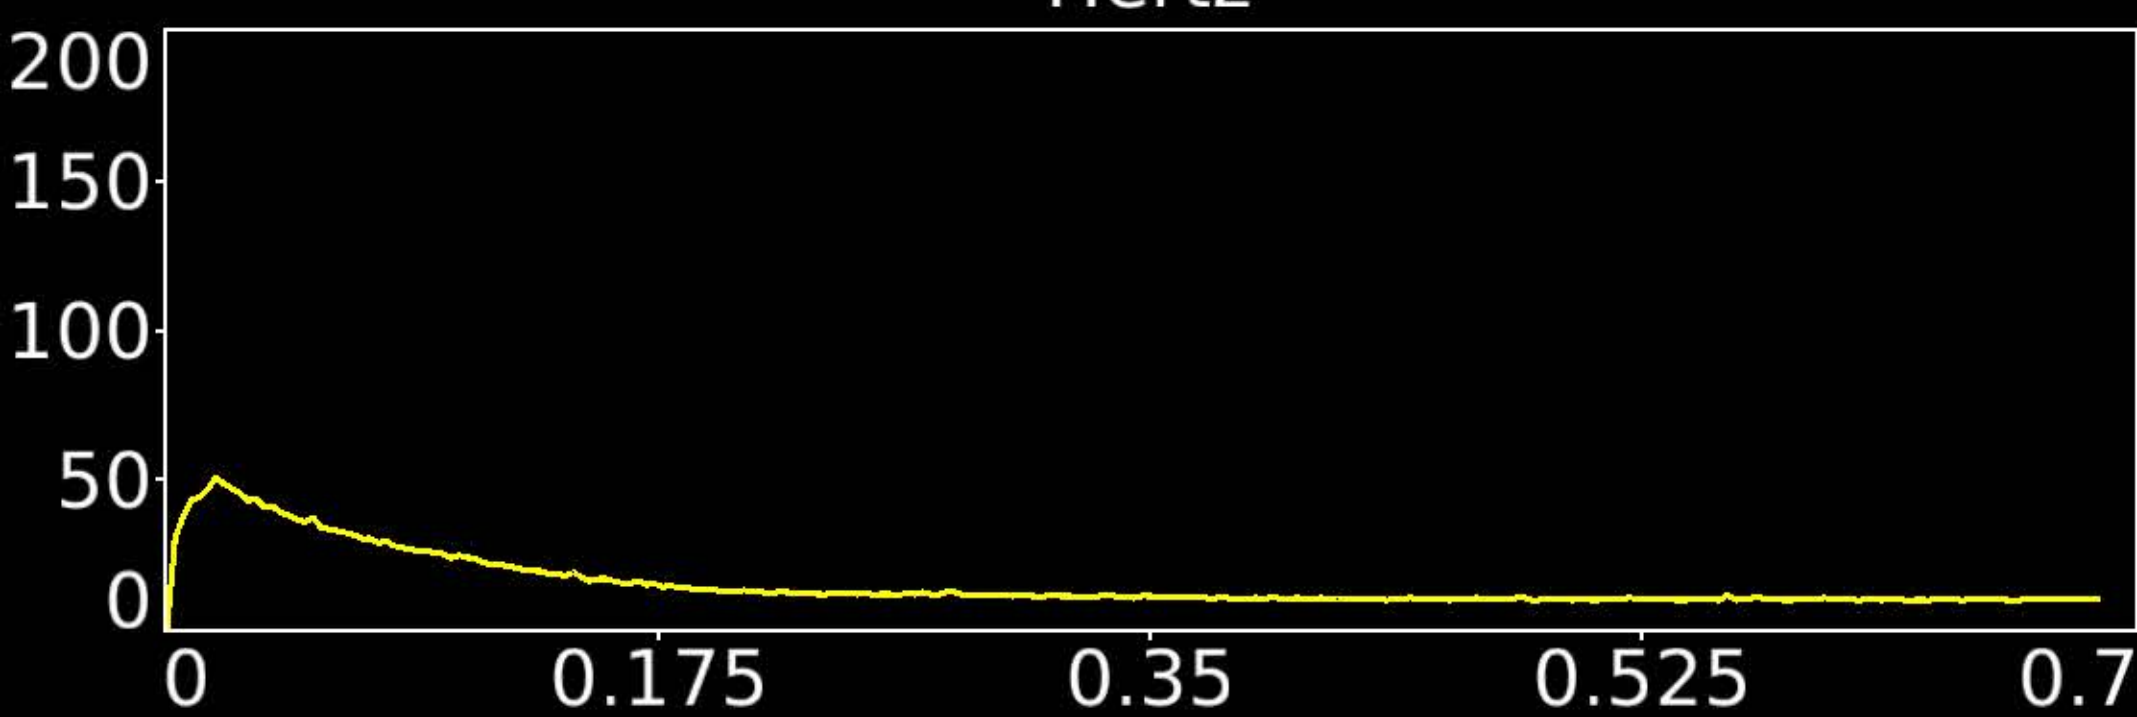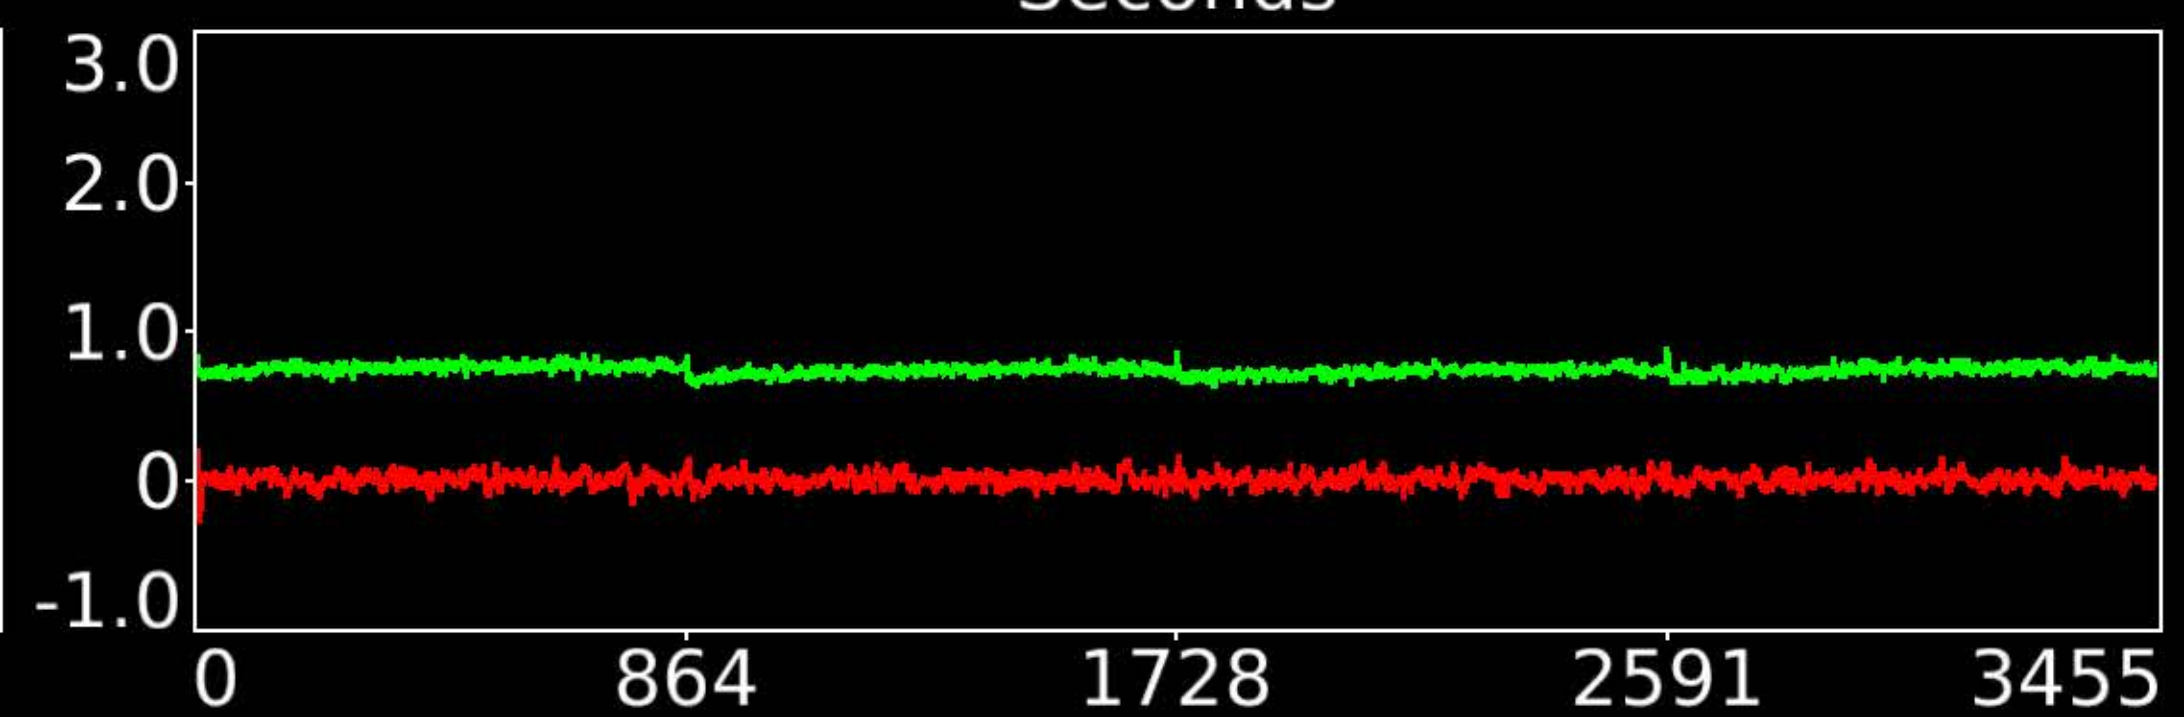

|                           |                            |                                 |  |
|---------------------------|----------------------------|---------------------------------|--|
| Number & Class: 39 Signal |                            | Name: Eye + Trunk Motor Network |  |
| RVT Correlated: No        | DVARS Dip Associated: Yes  | Cross-Subject Variable: No      |  |
| Single Subject: No        | % Variance Explained: 0.86 | Globality Index: 0.26           |  |
| Task Component: 29        | Taskr Component: 28        | Sleep Noted: No                 |  |

Rationale: Spatial map includes positive and negative patches that respect known somatotopic sensori-motor organization (Eye and Trunk)



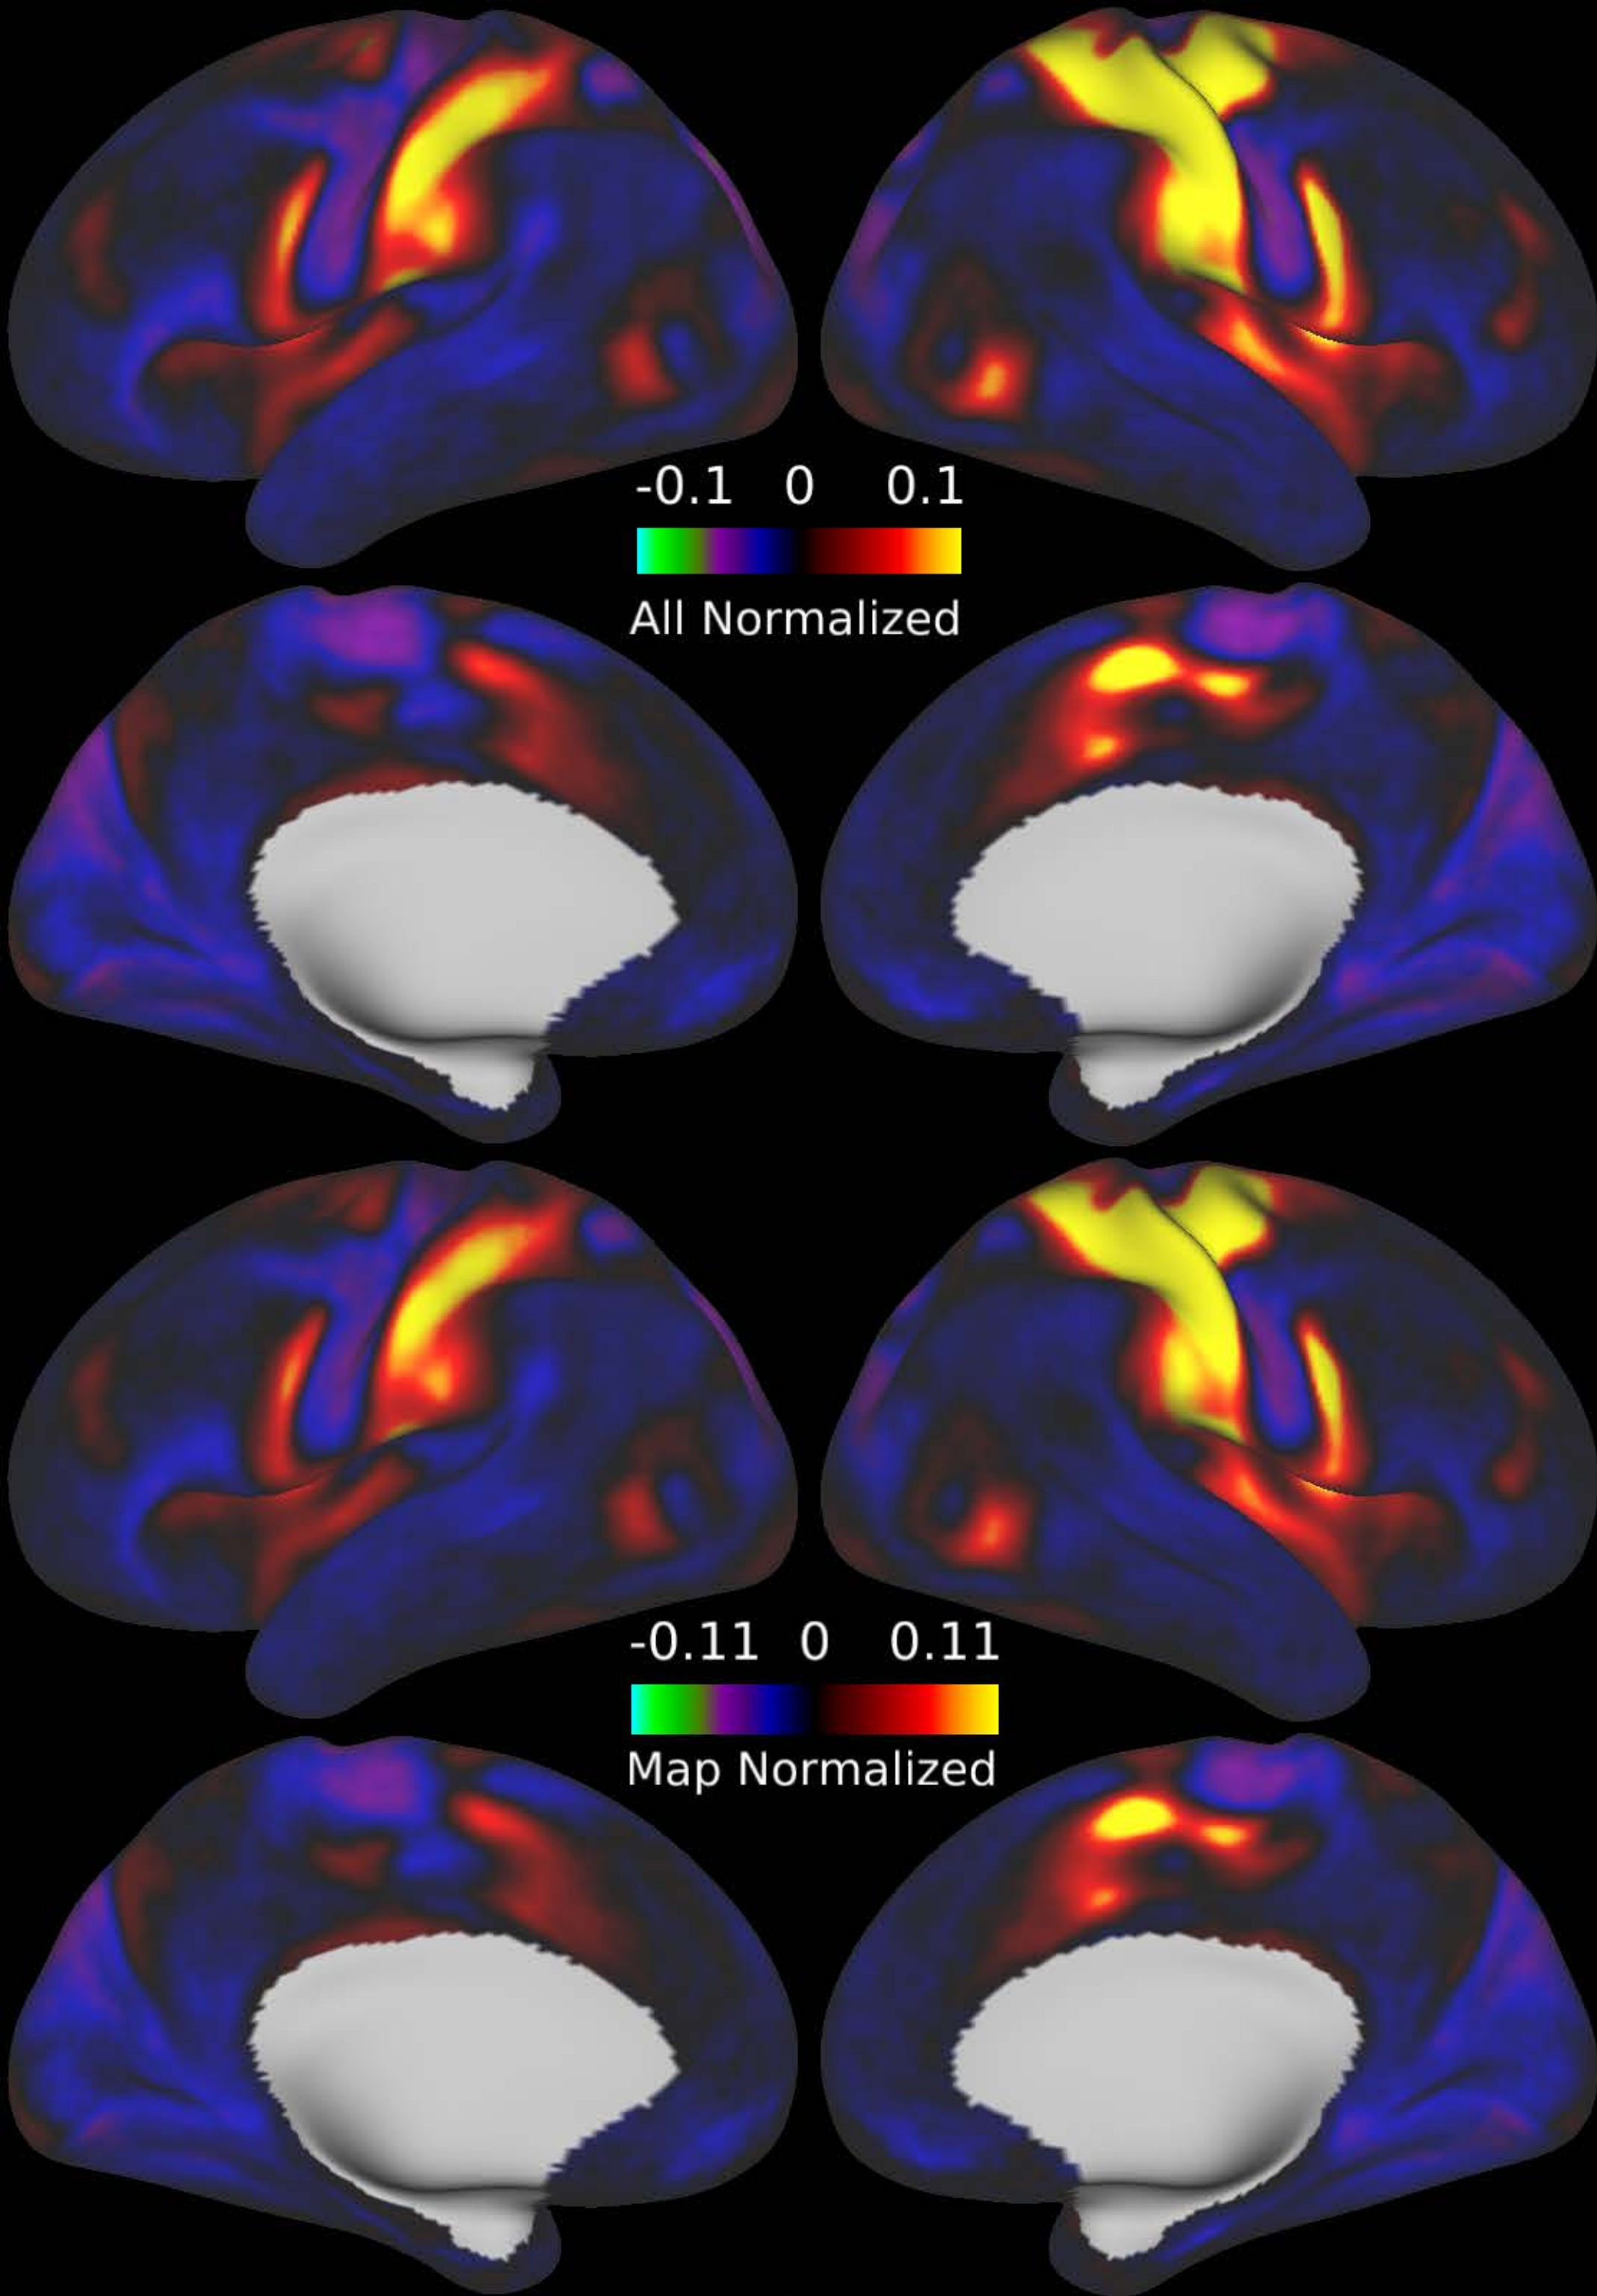

Hertz

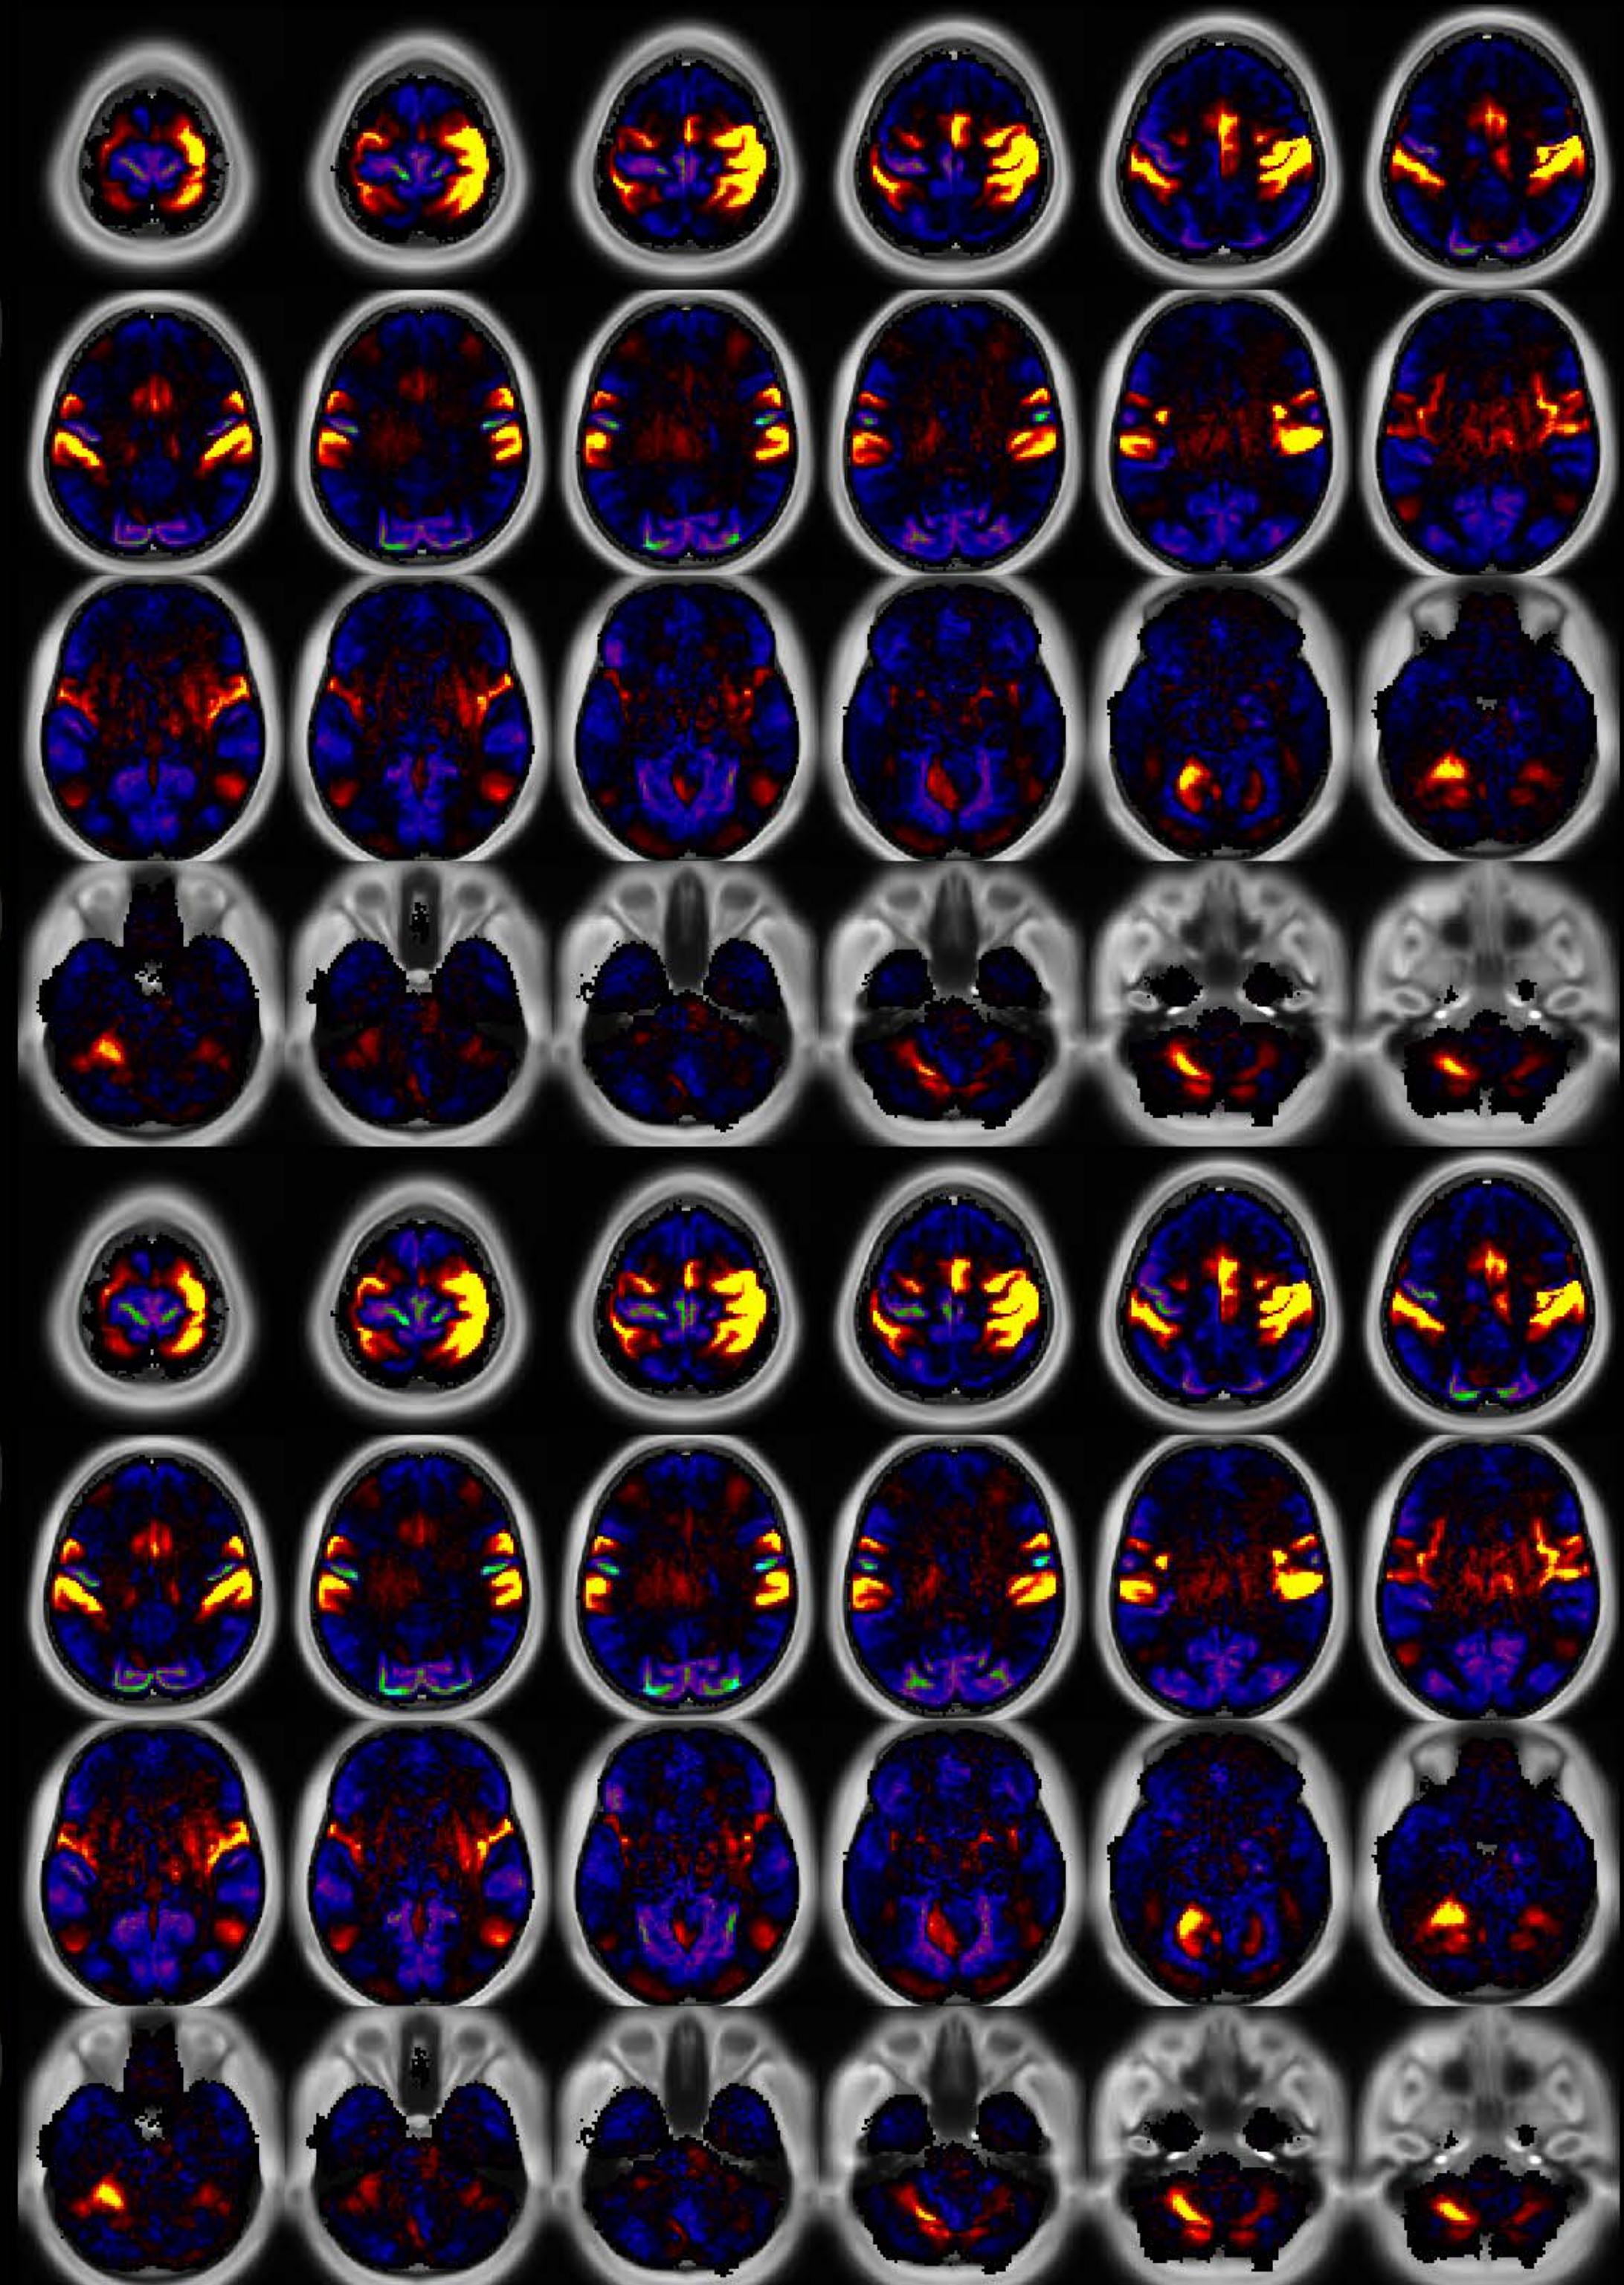

Seconds

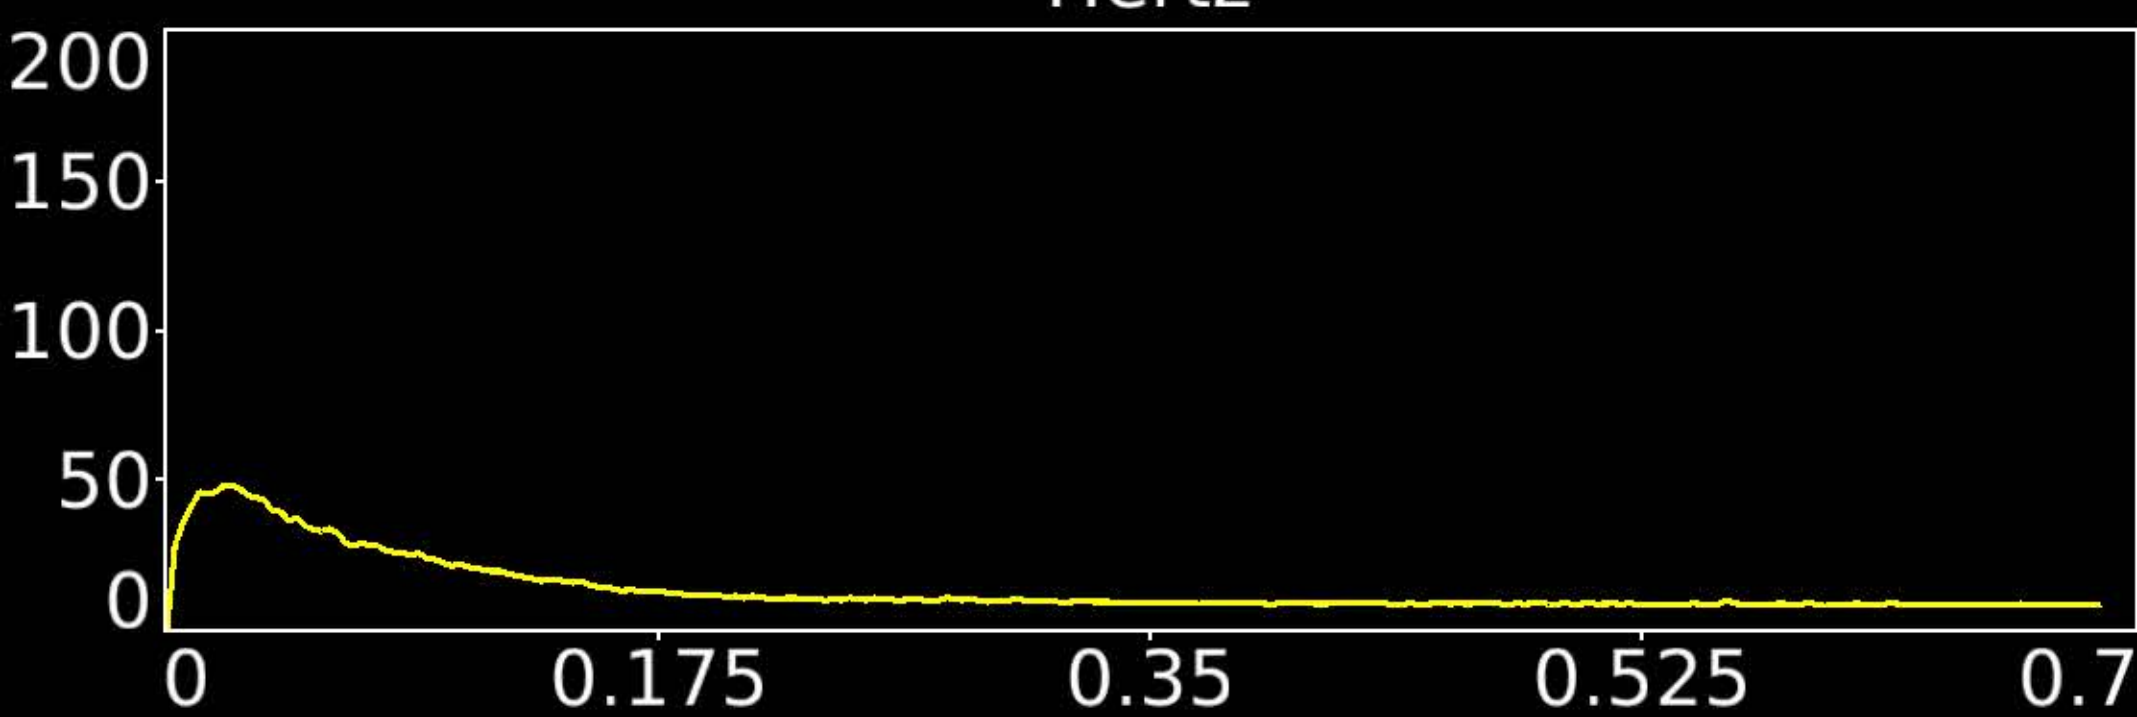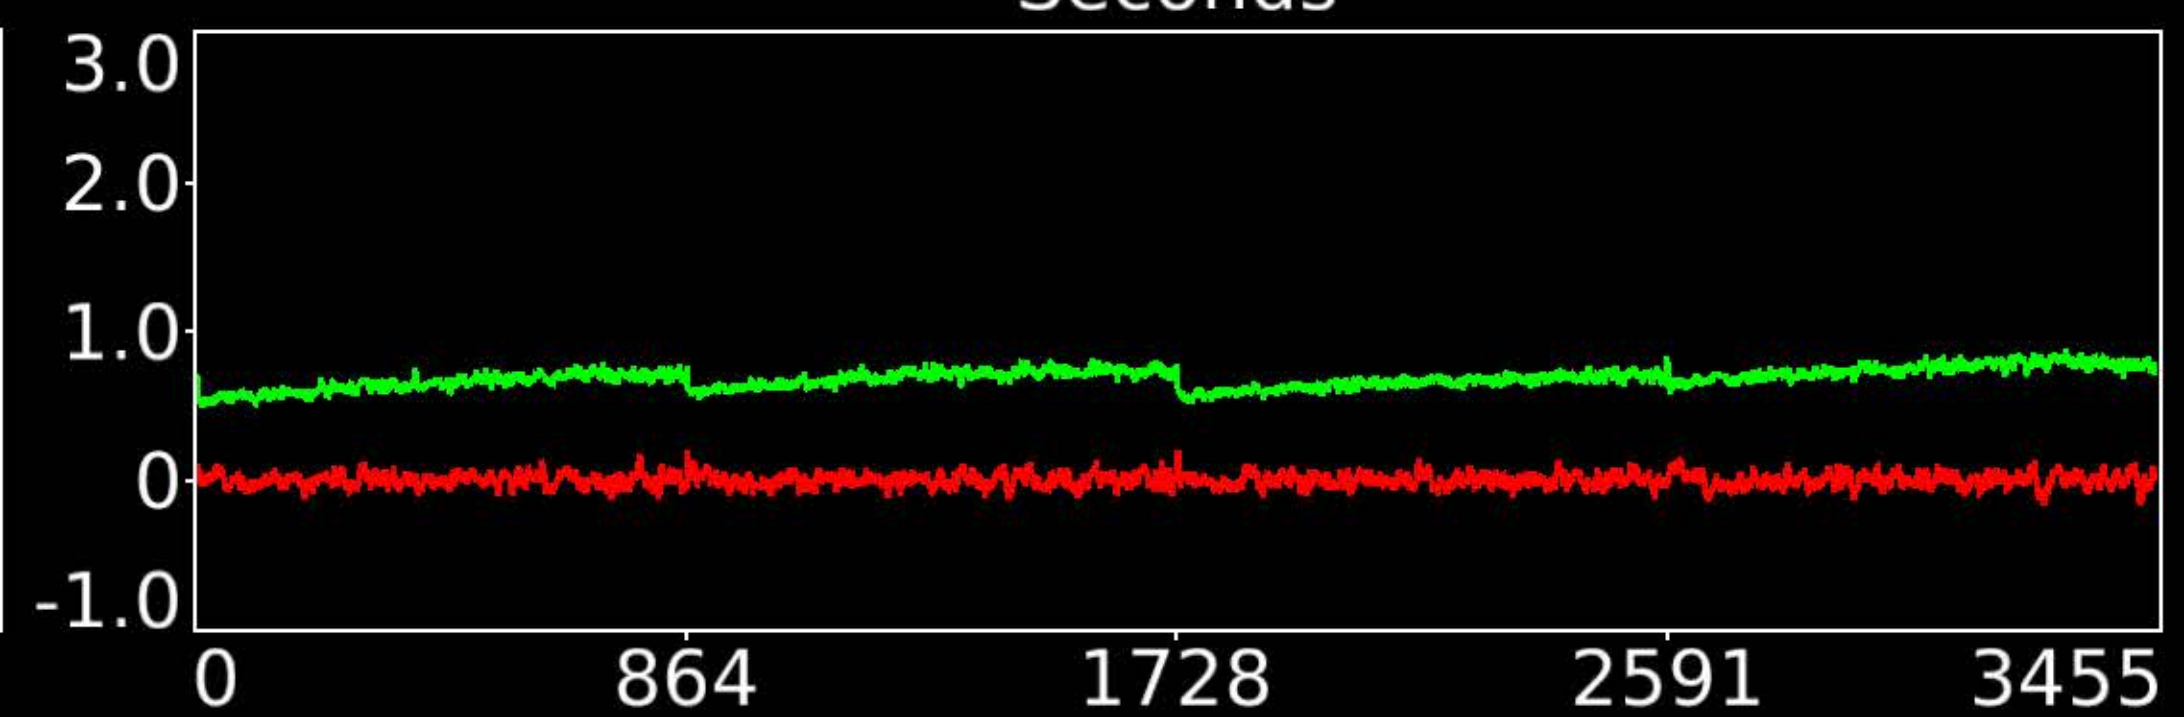

|                           |                            |                               |  |
|---------------------------|----------------------------|-------------------------------|--|
| Number & Class: 40 Signal |                            | Name: Left Hand Motor Network |  |
| RVT Correlated: No        | DVARS Dip Associated: No   | Cross-Subject Variable: Yes   |  |
| Single Subject: No        | % Variance Explained: 0.83 | Globality Index: 0.76         |  |
| Task Component: 31        | Taskr Component: 26        | Sleep Noted: No               |  |

Rationale: Spatial map includes positive and negative patches that respect known somatotopic sensori-motor organization (Left Hand)



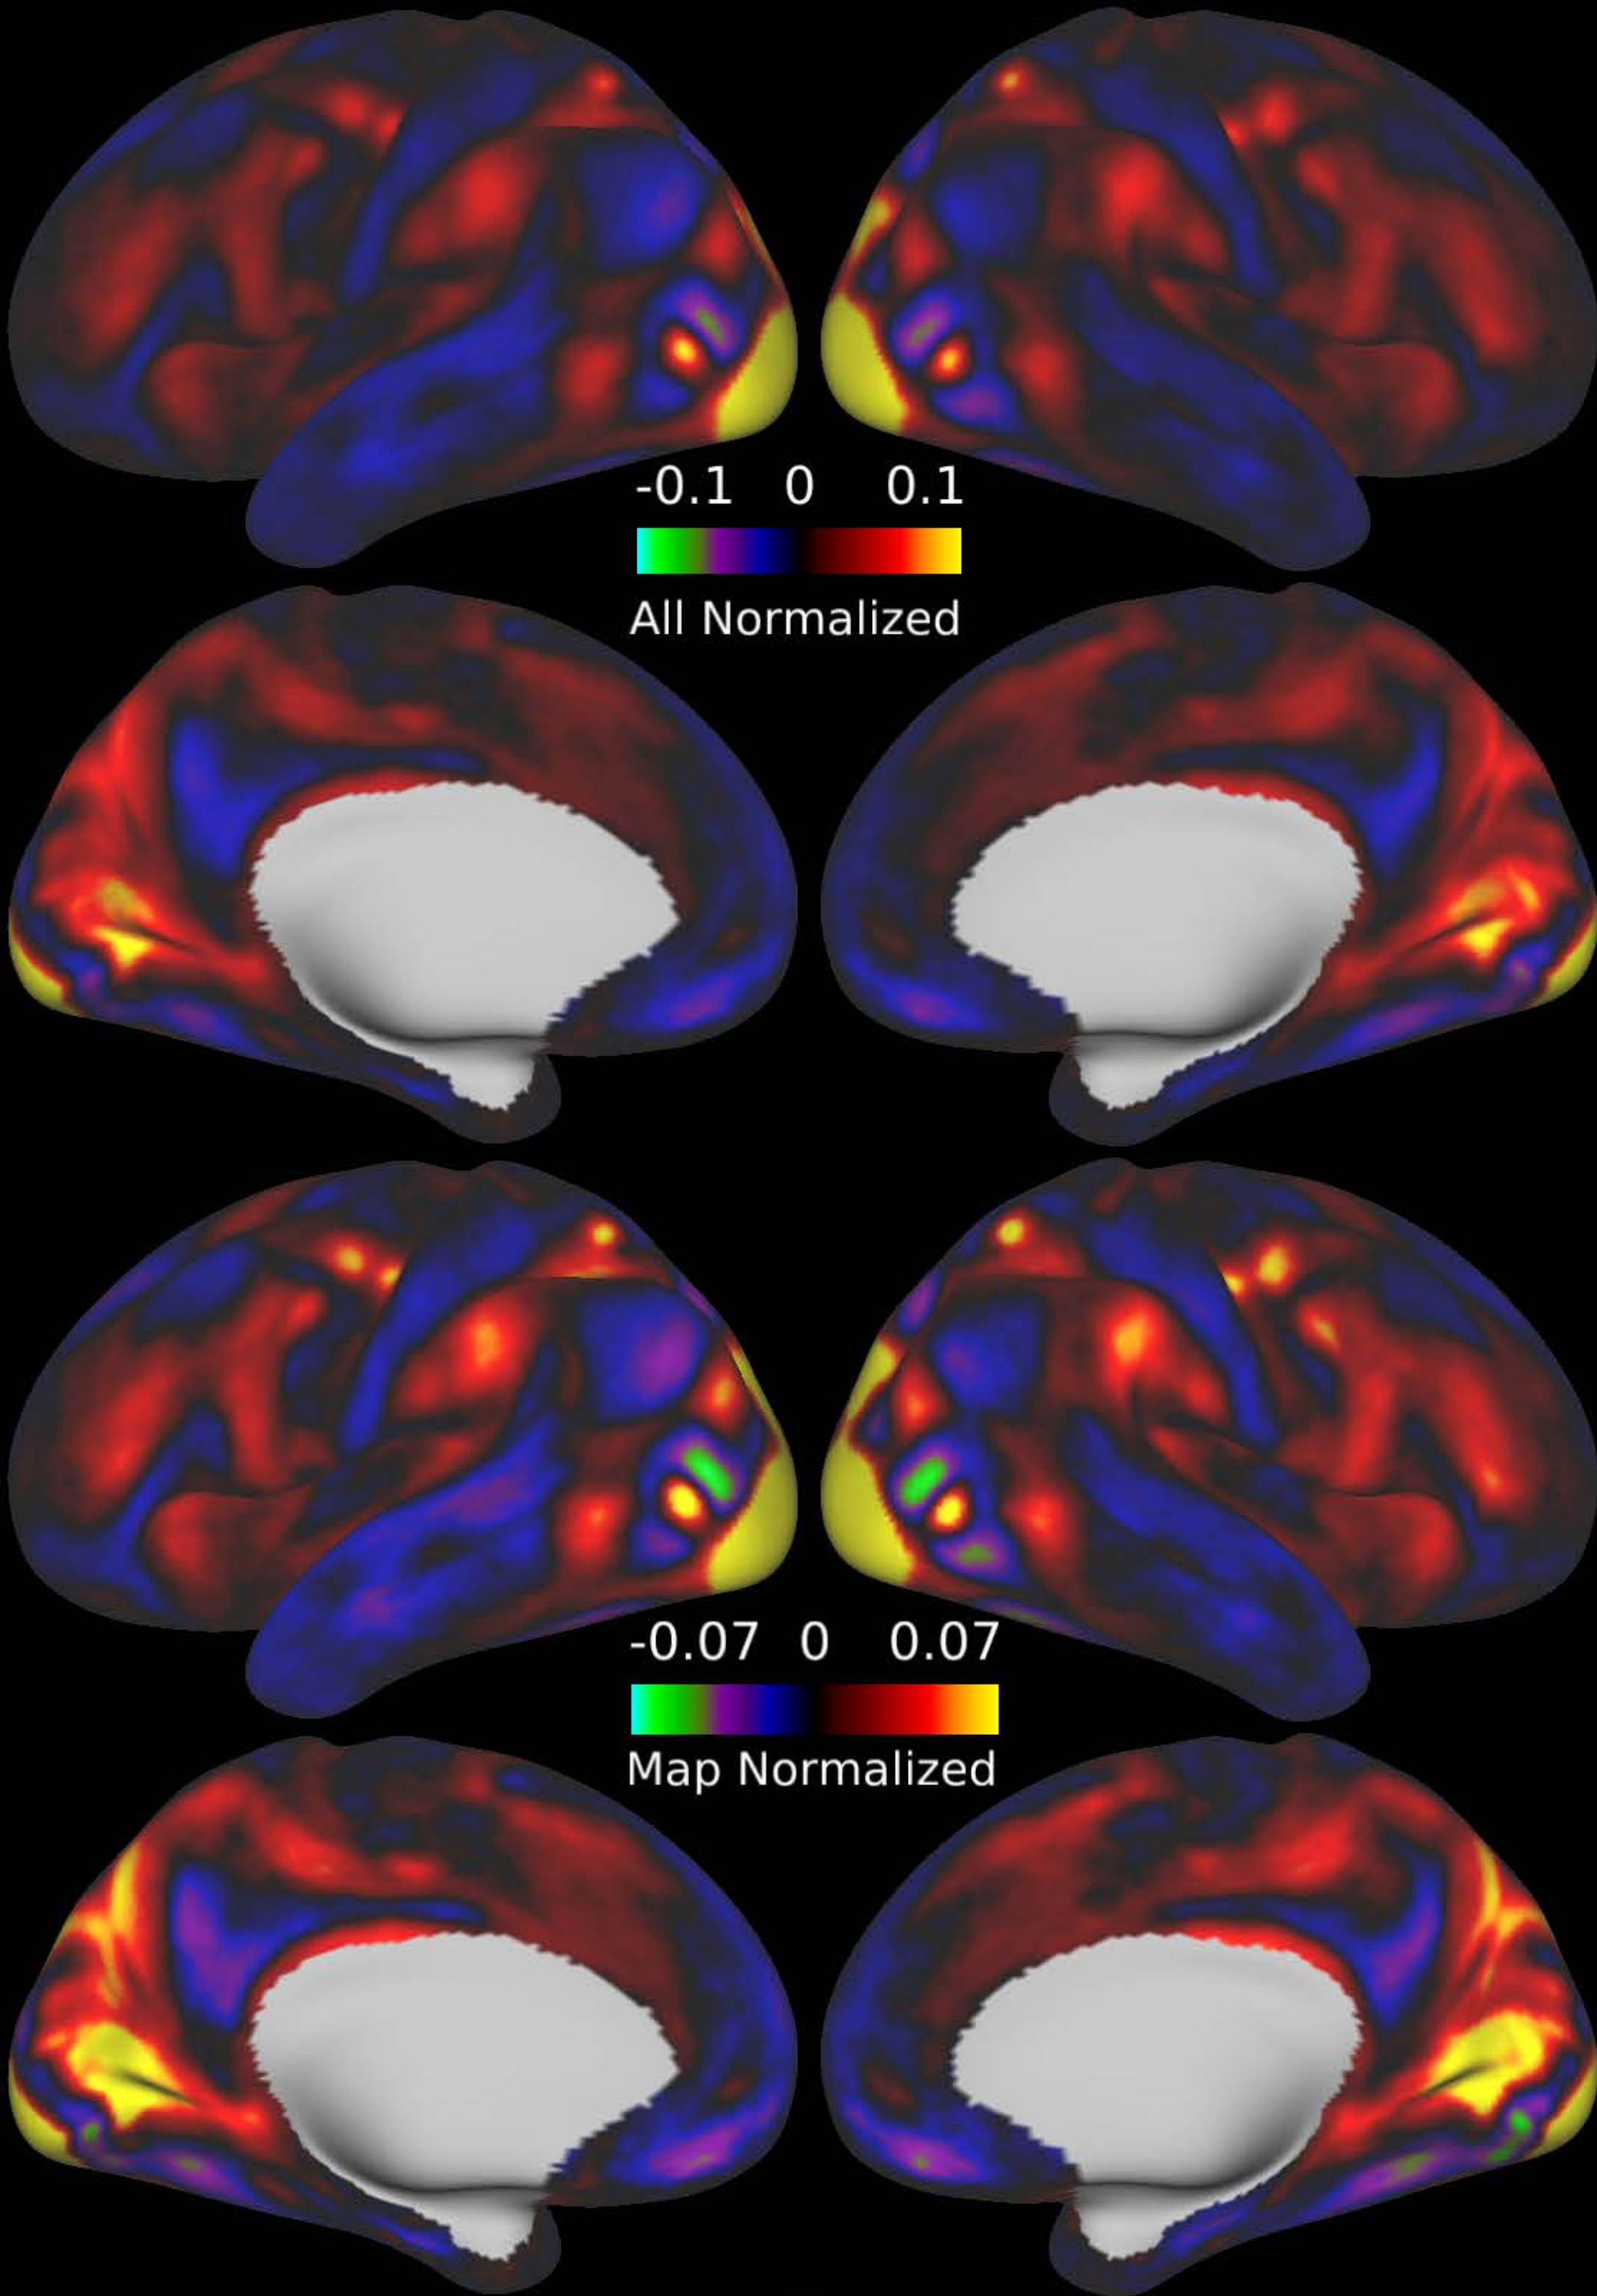

Hertz

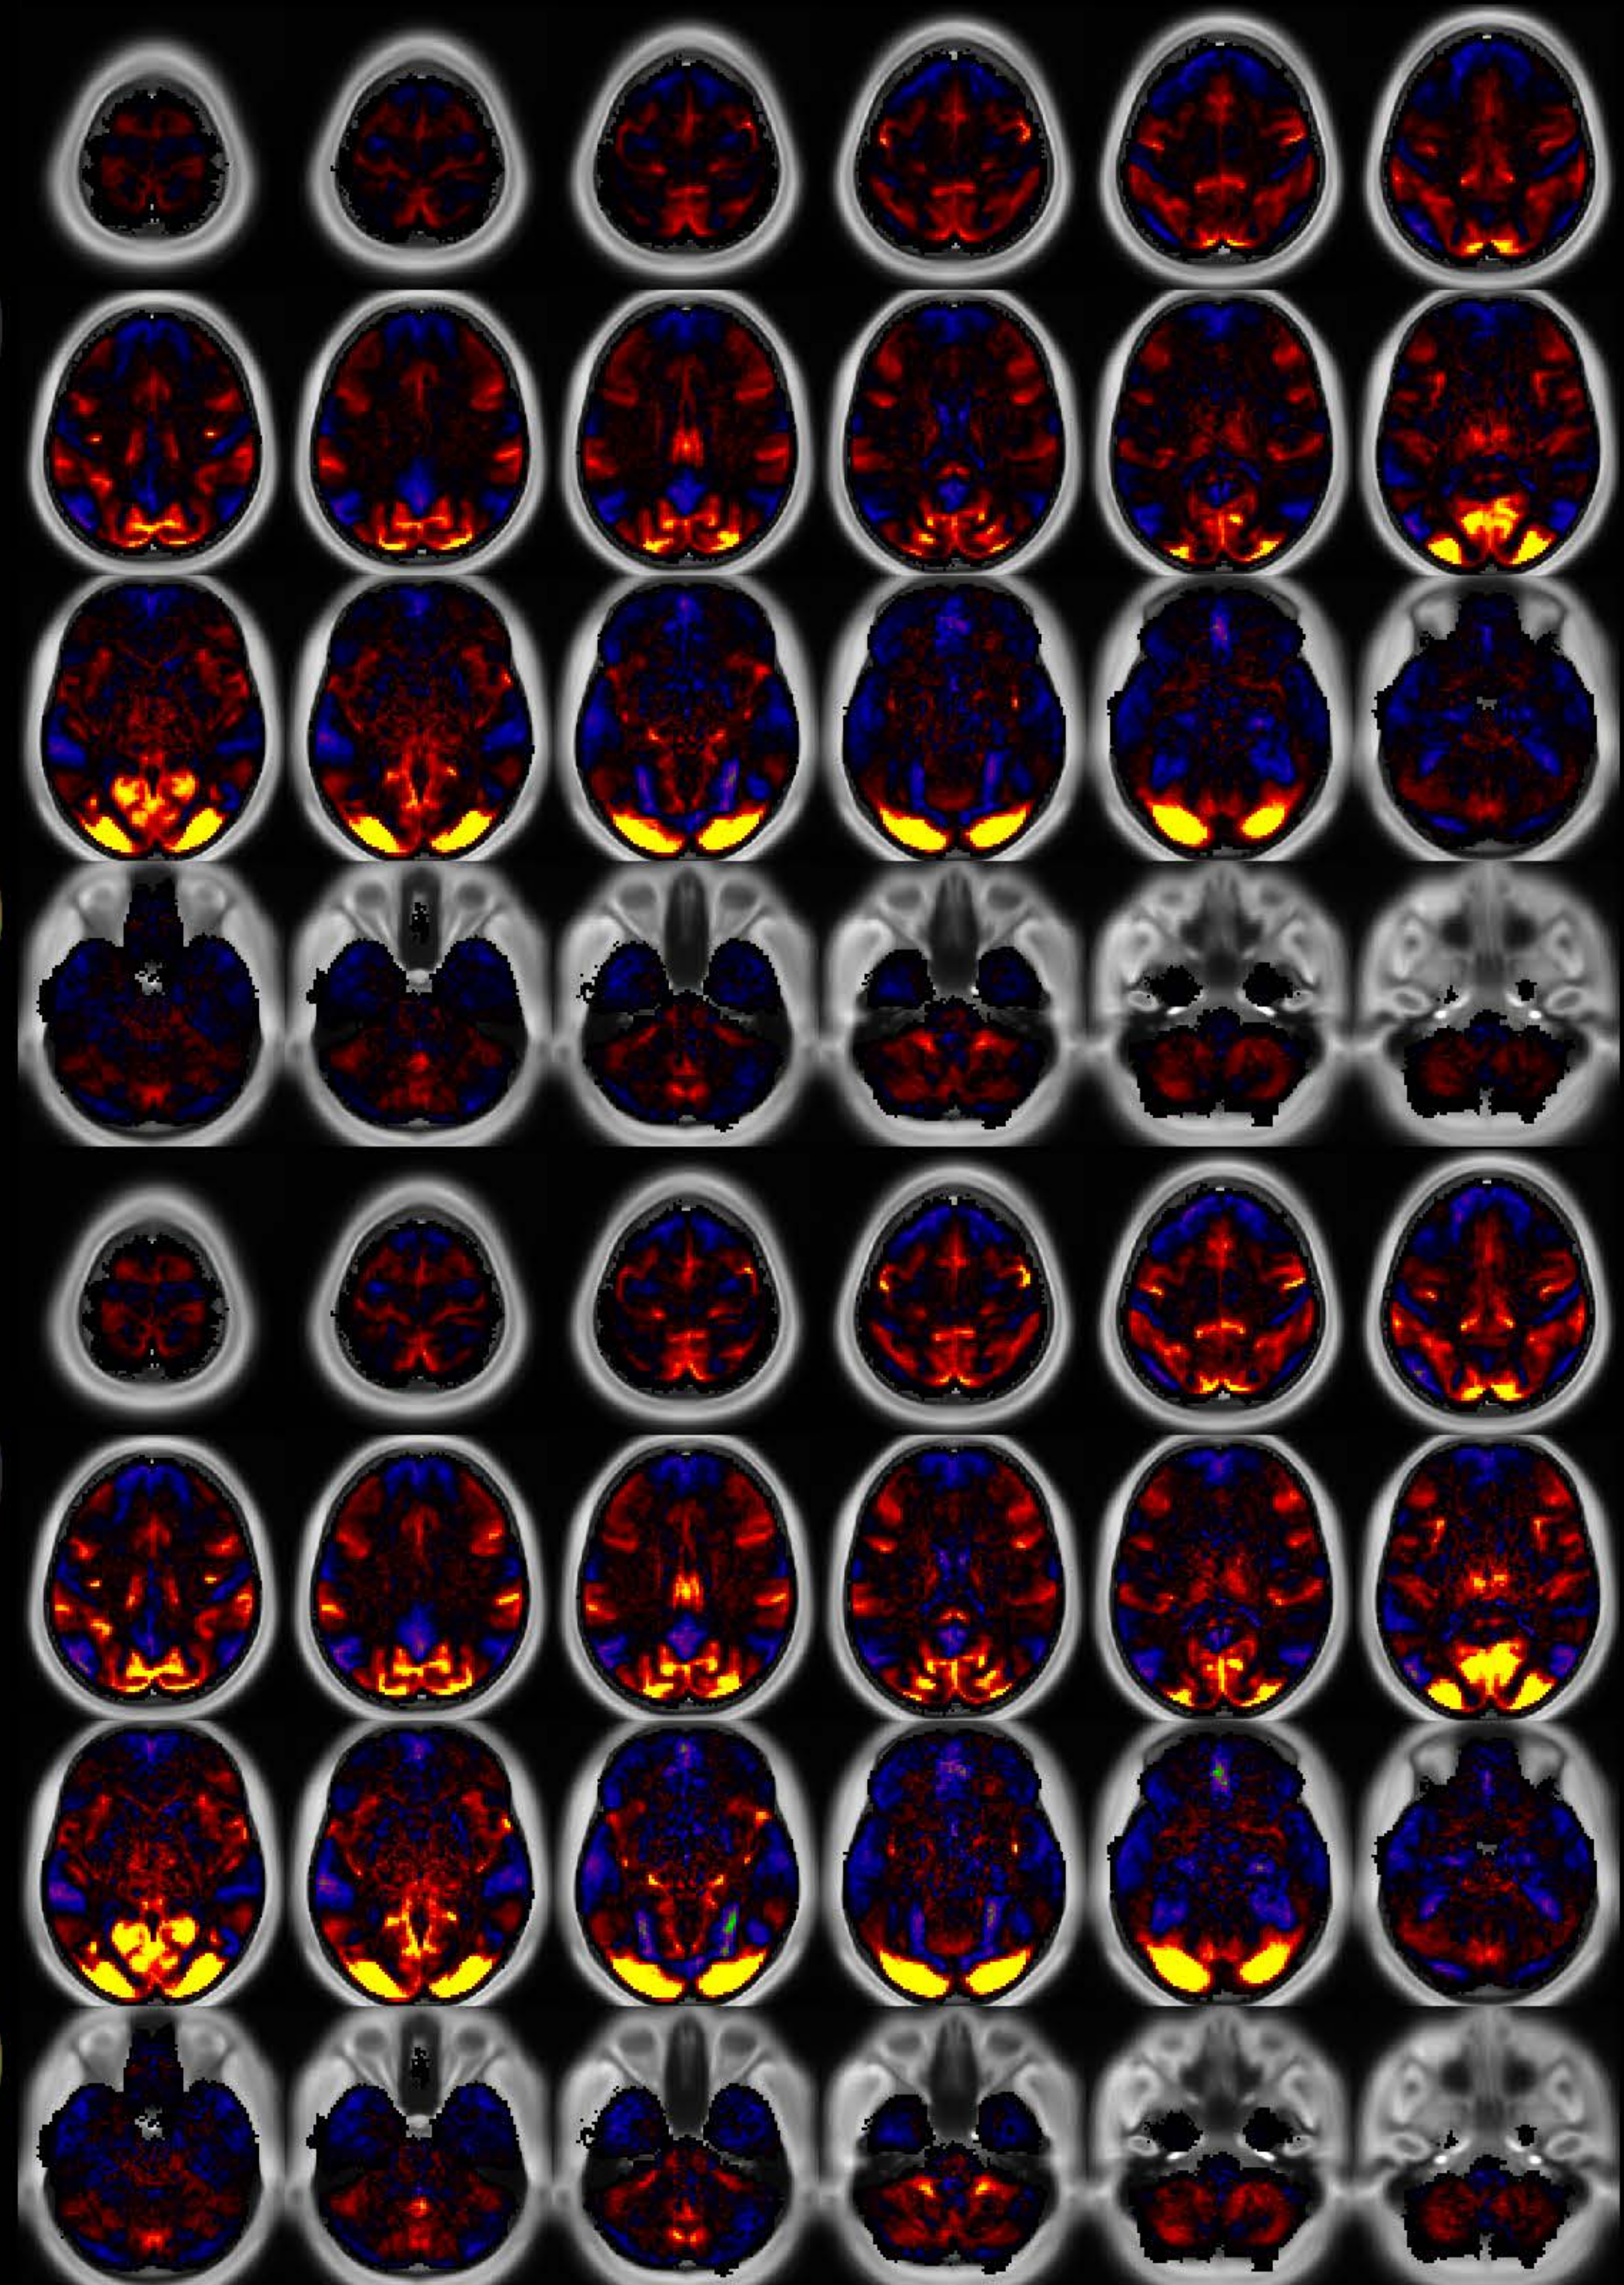

Seconds

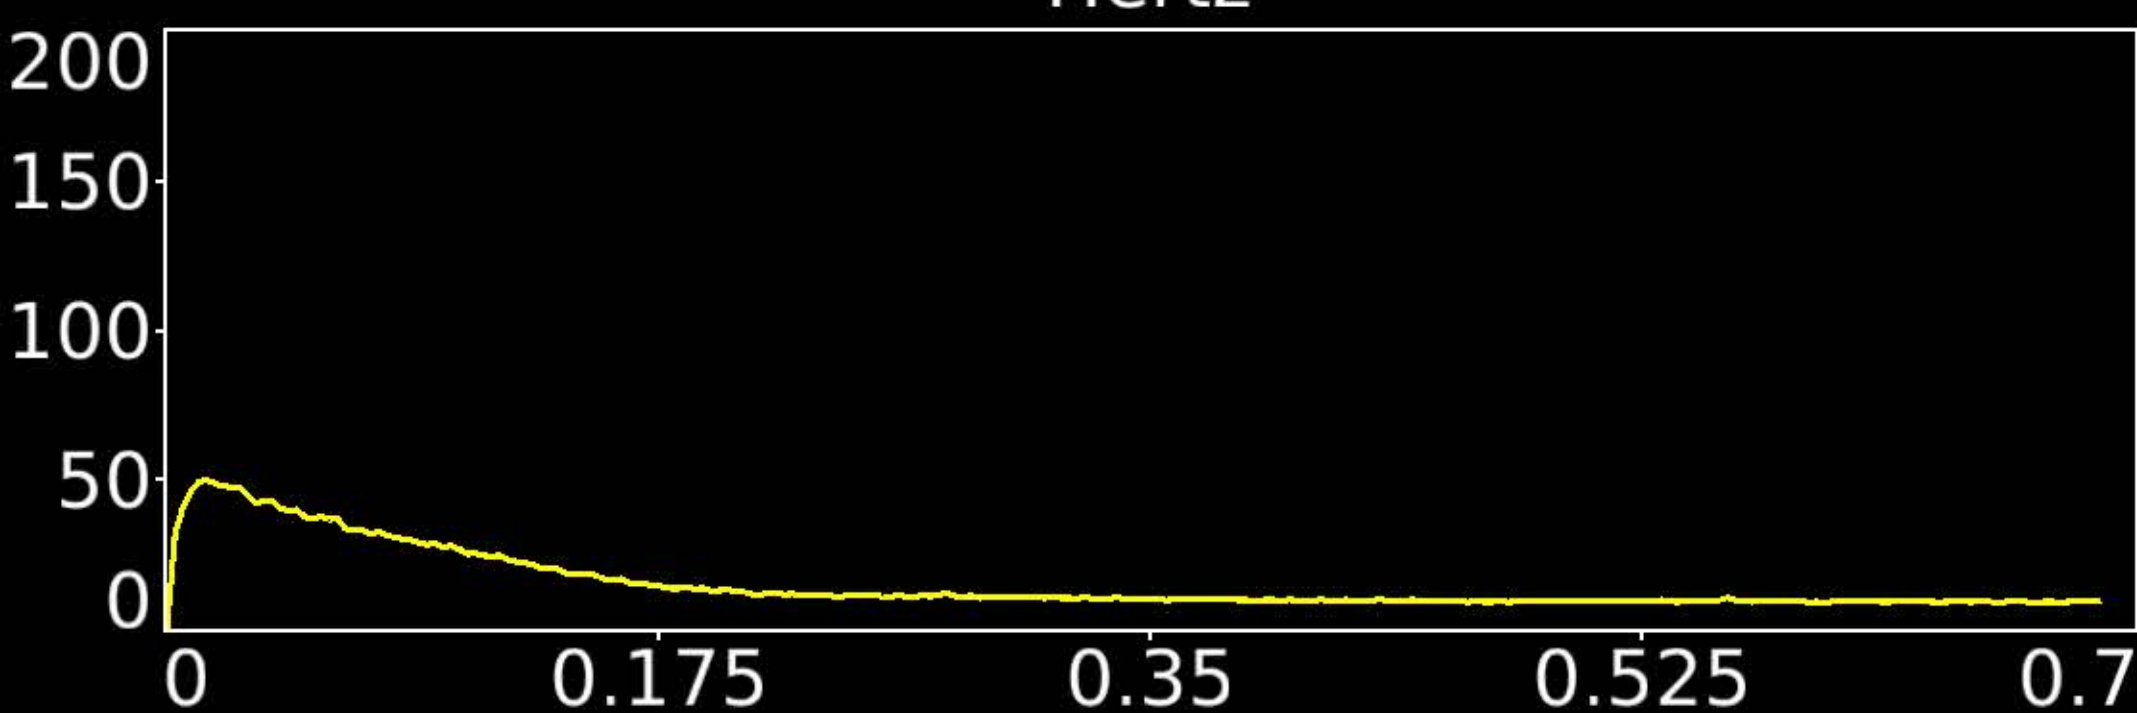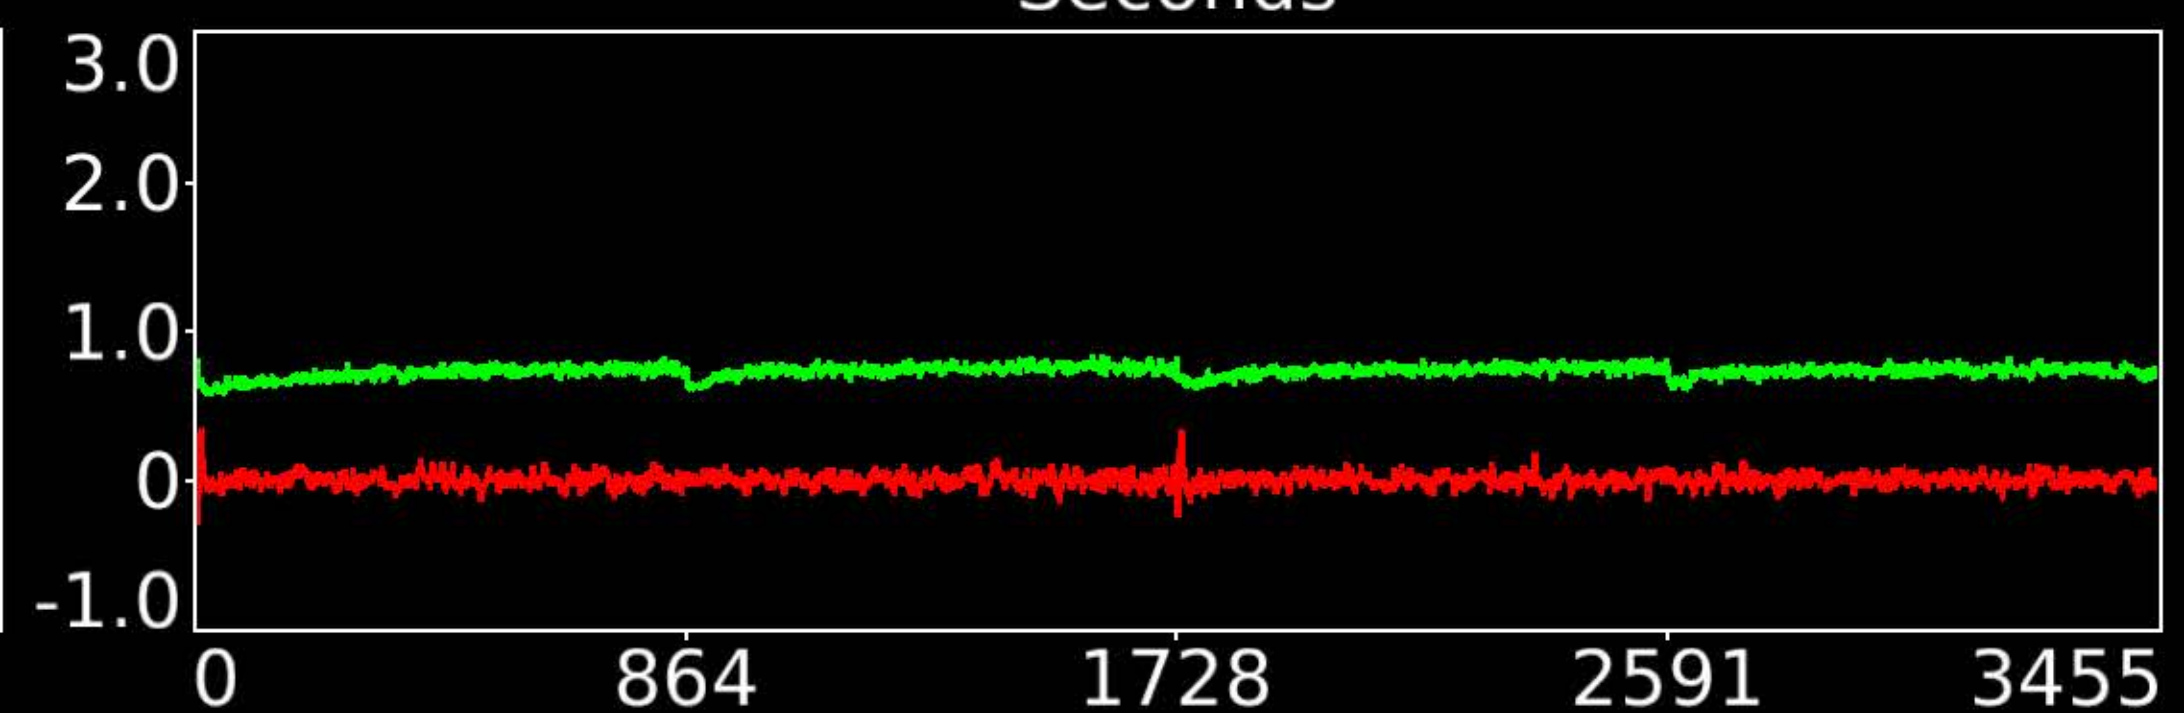

|                           |                            |                            |  |
|---------------------------|----------------------------|----------------------------|--|
| Number & Class: 41 Signal |                            | Name: Pan Visual Foveal    |  |
| RVT Correlated: No        | DVARS Dip Associated: No   | Cross-Subject Variable: No |  |
| Single Subject: No        | % Variance Explained: 0.83 | Globality Index: 0.73      |  |
| Task Component: 34        | Taskr Component: 15        | Sleep Noted: No            |  |

Rationale: Spatial map includes positive and negative patches that respect known retinotopic visual organization (Foveal vs ParaCentral)



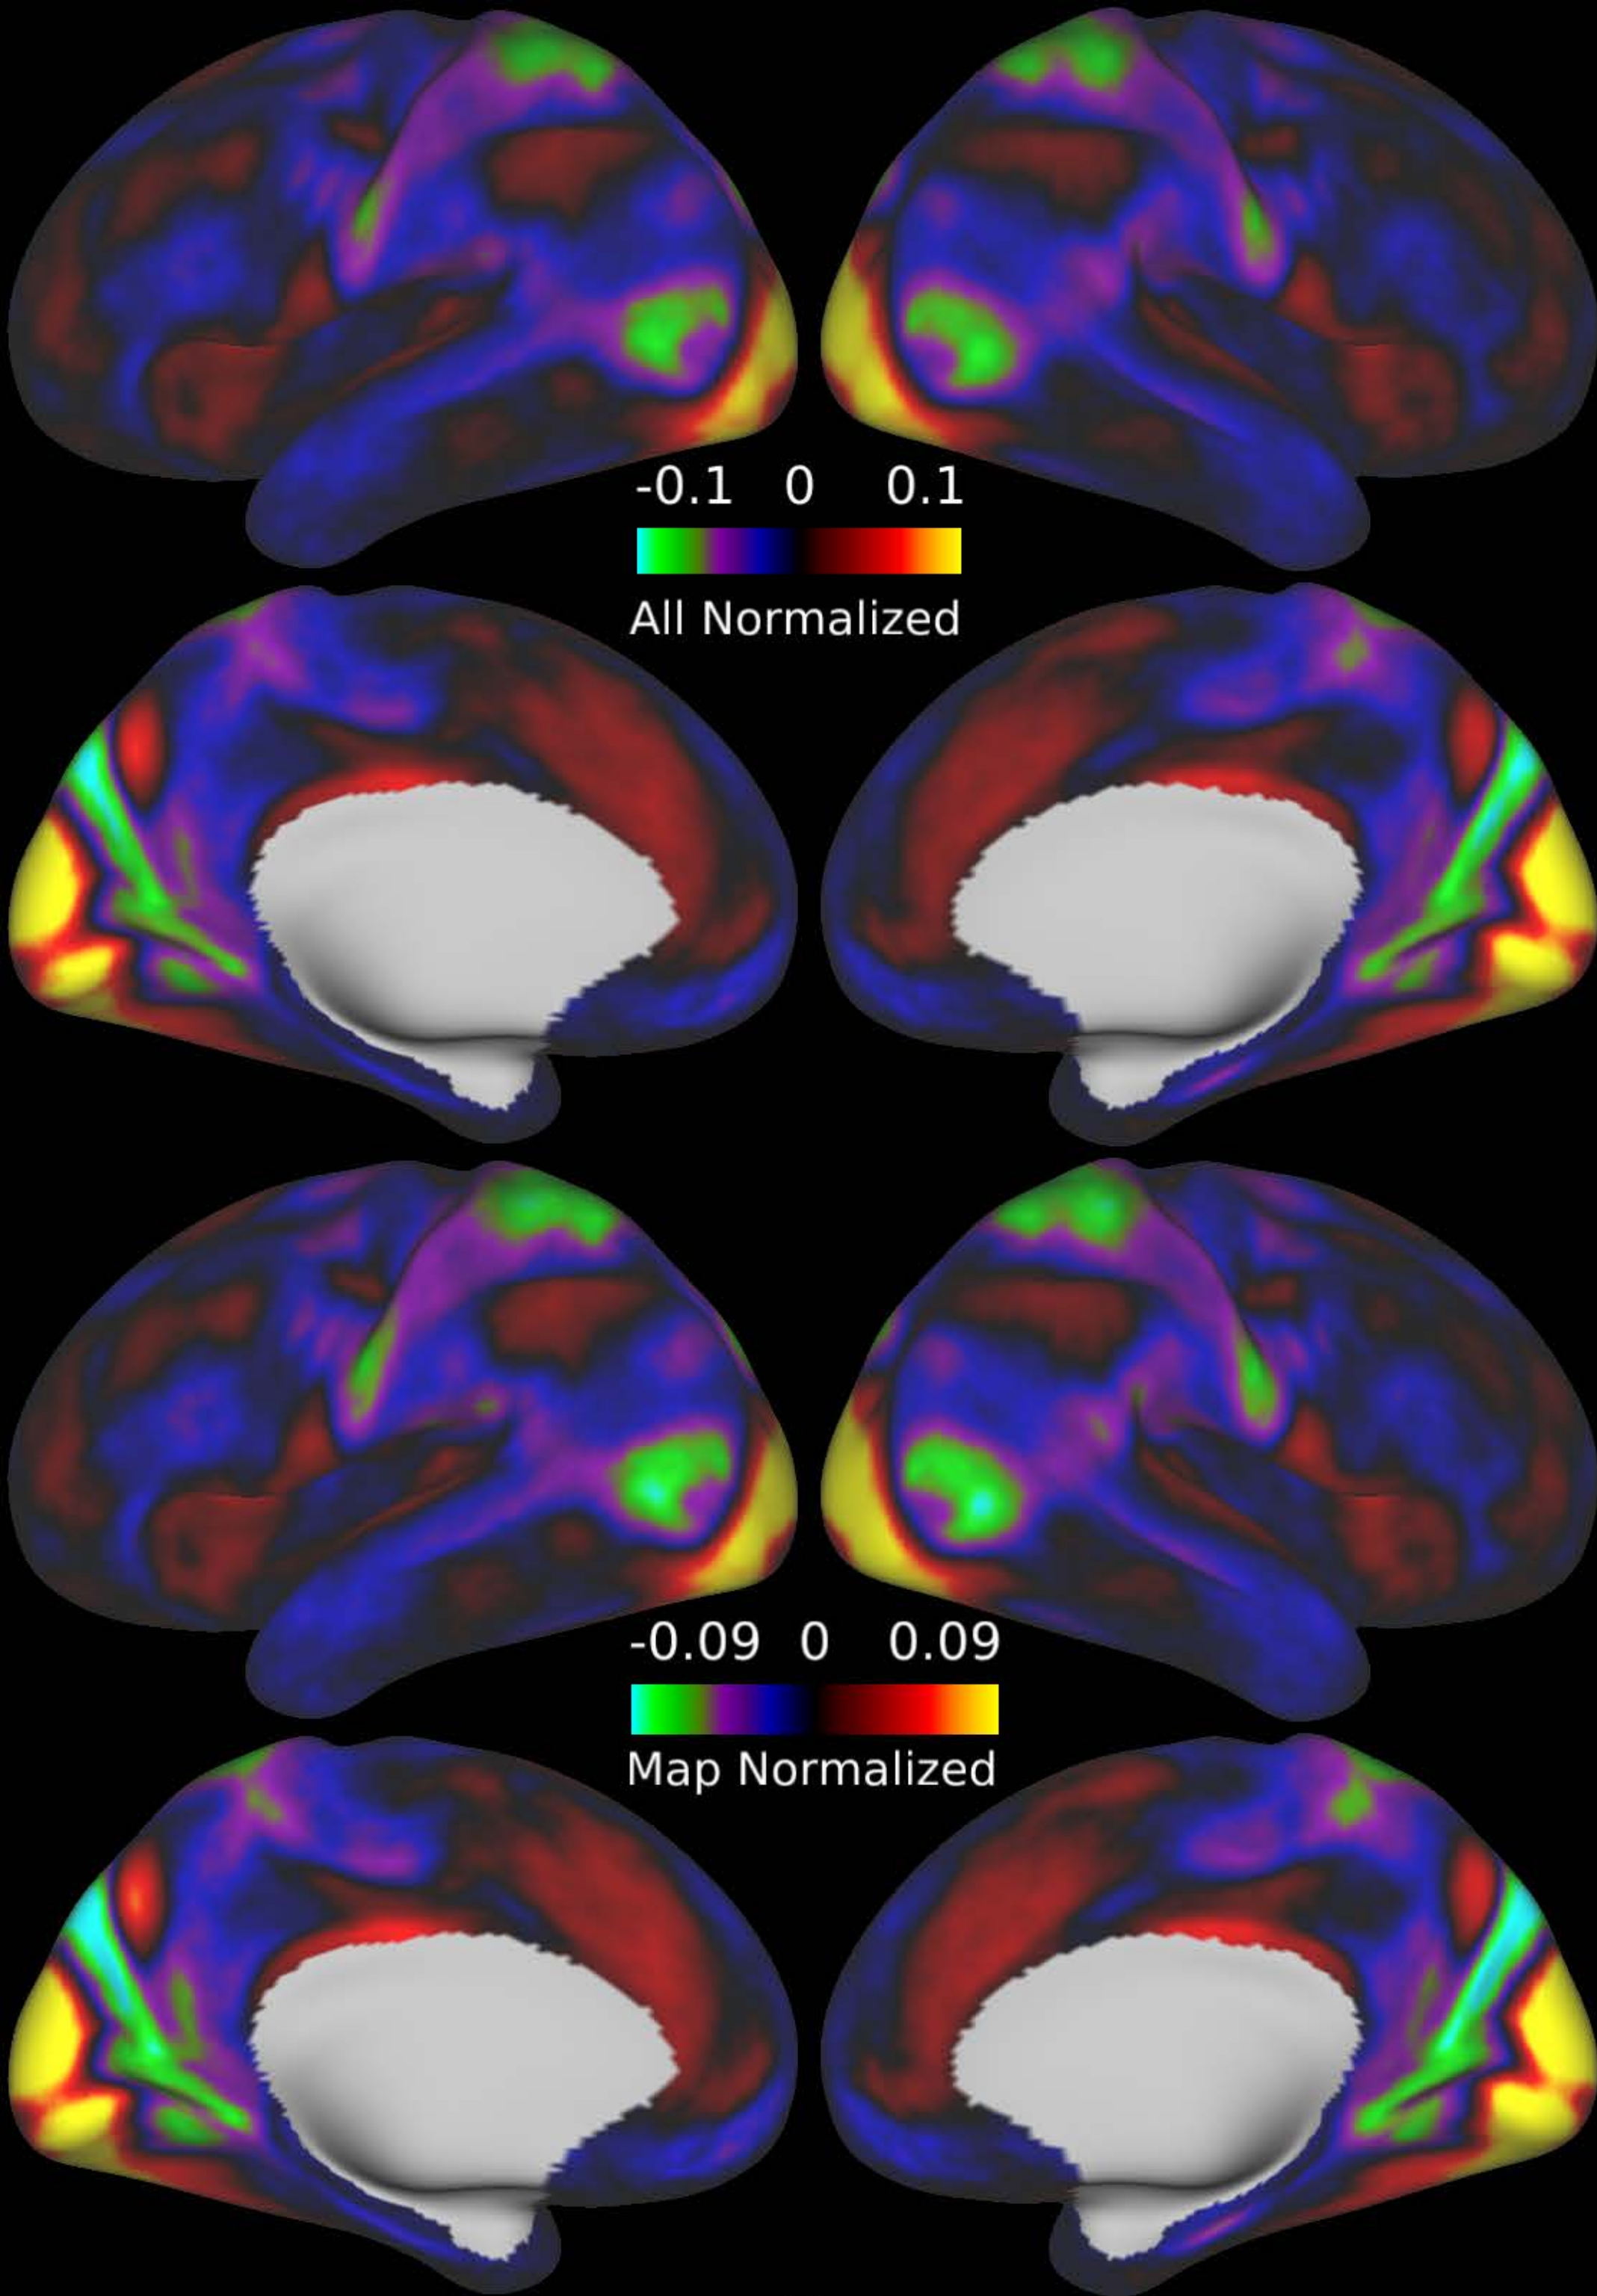

Hertz

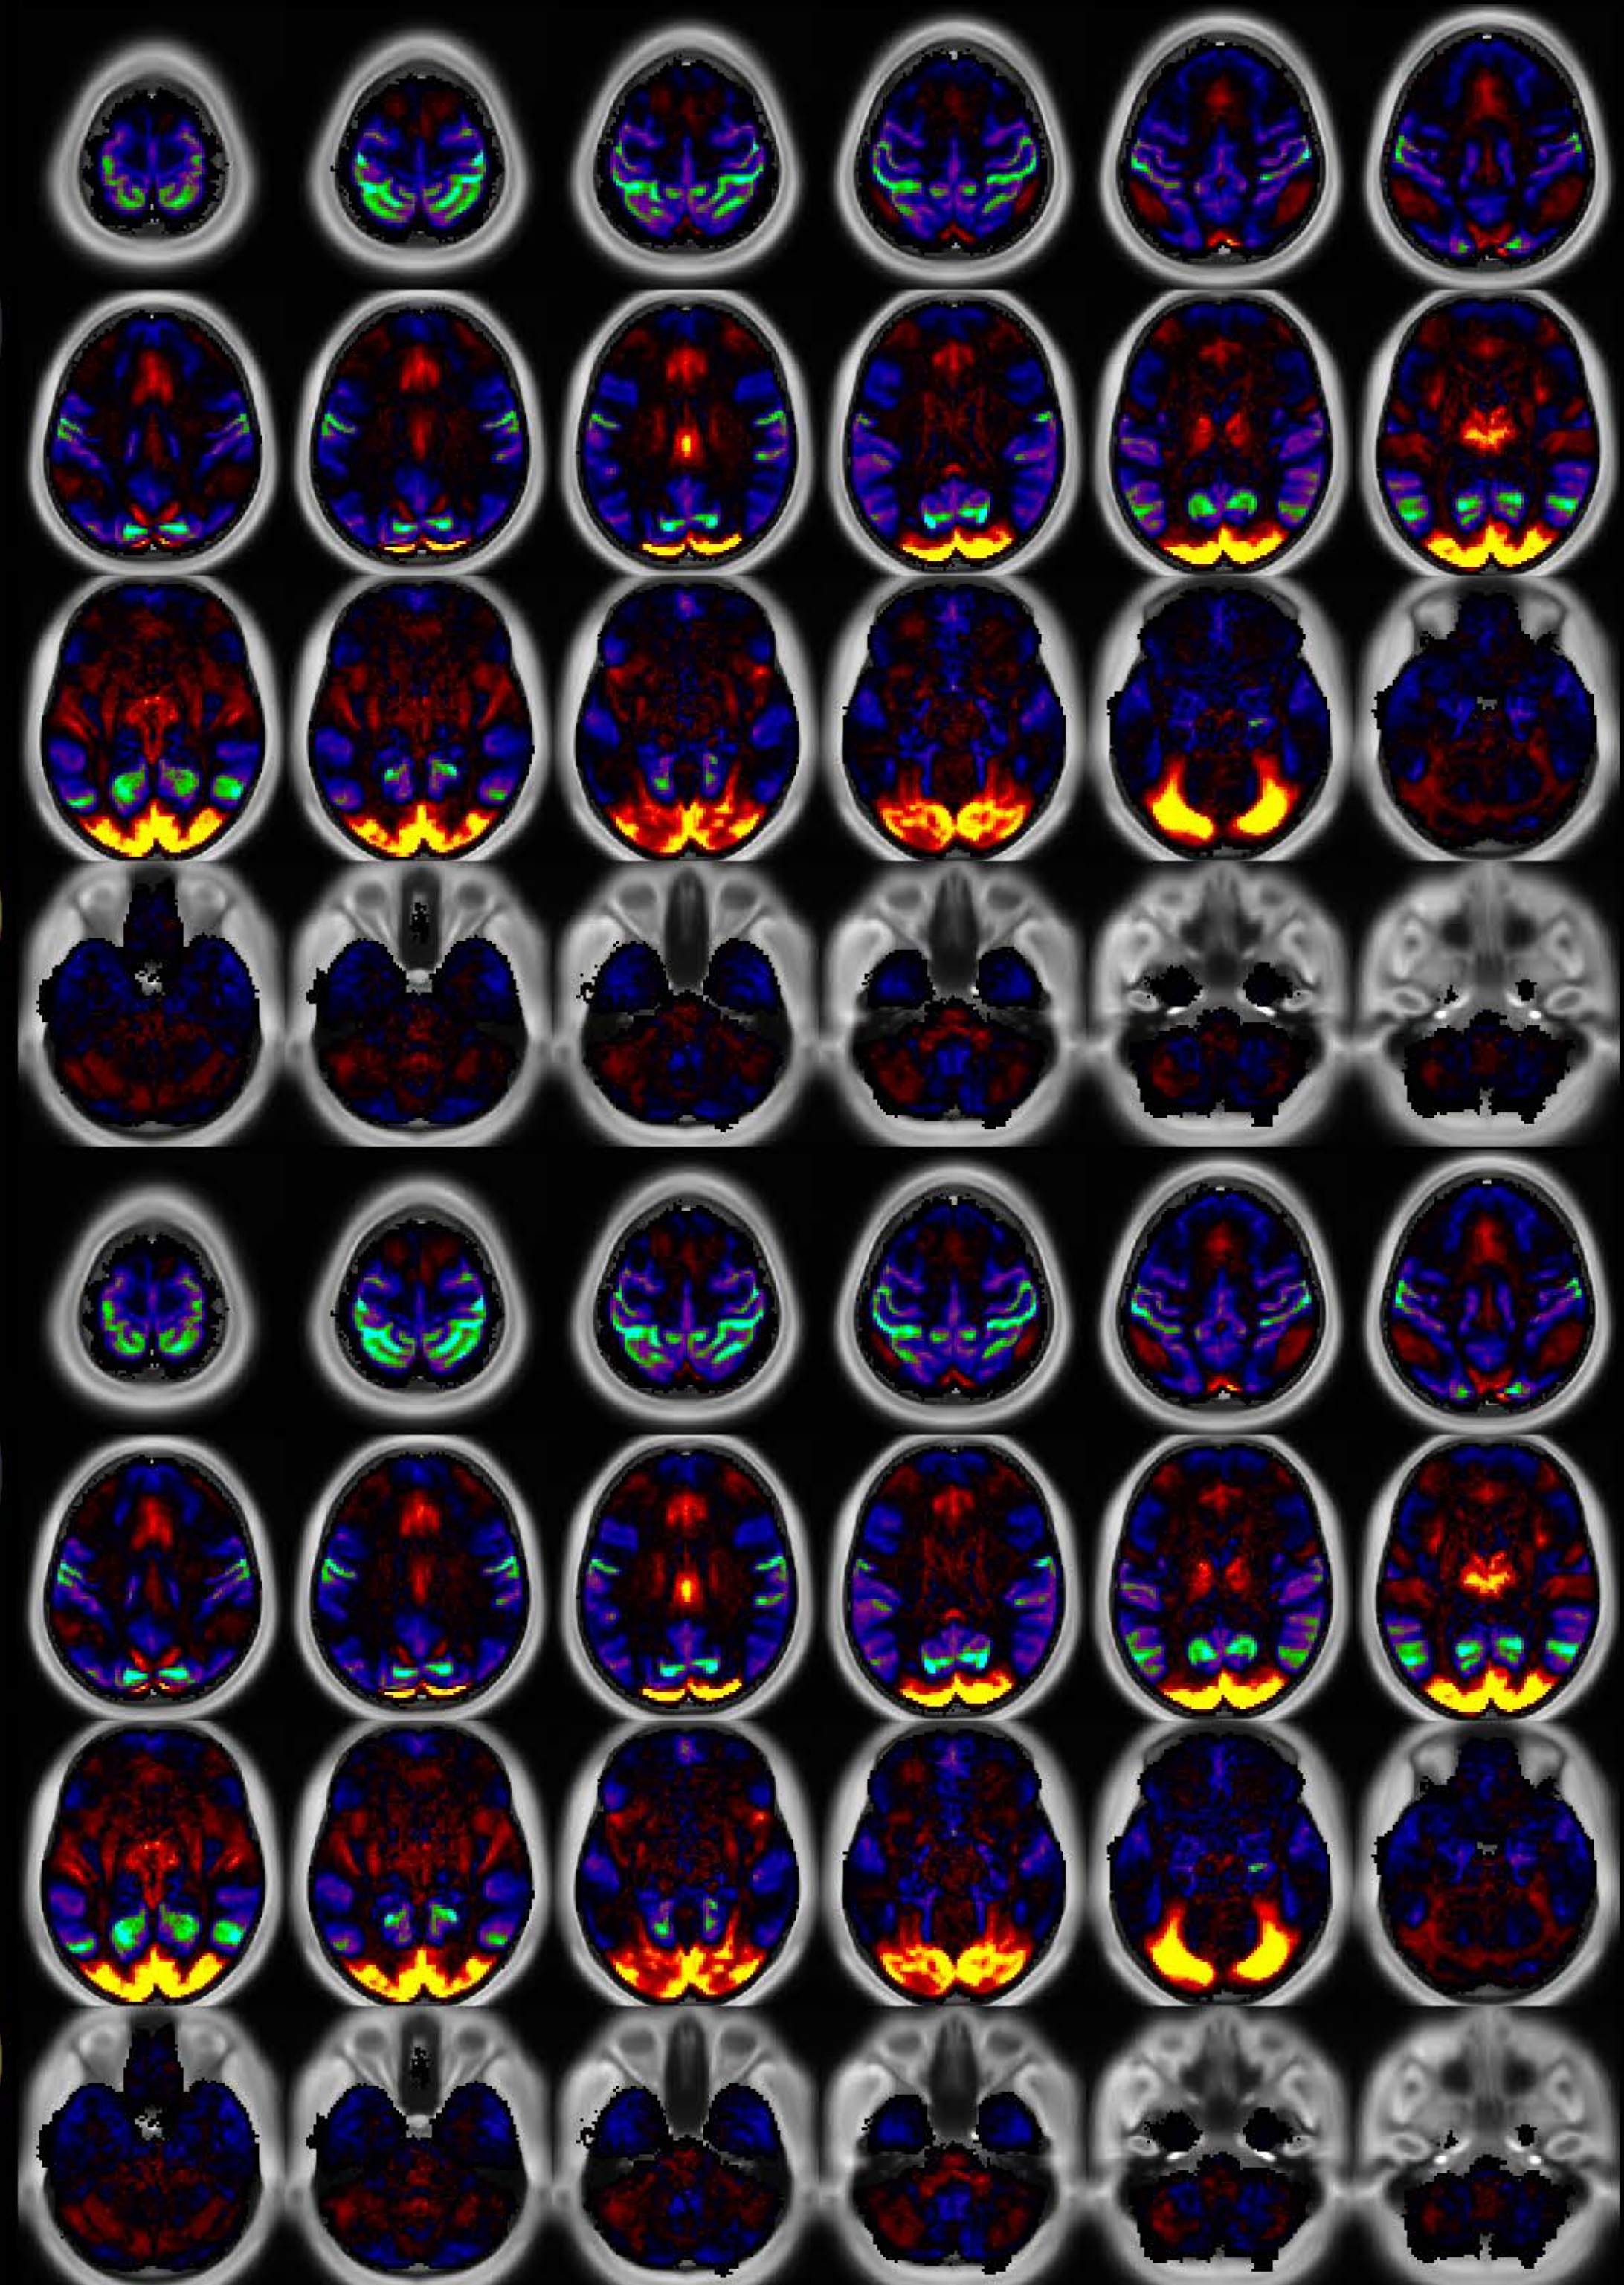

Seconds

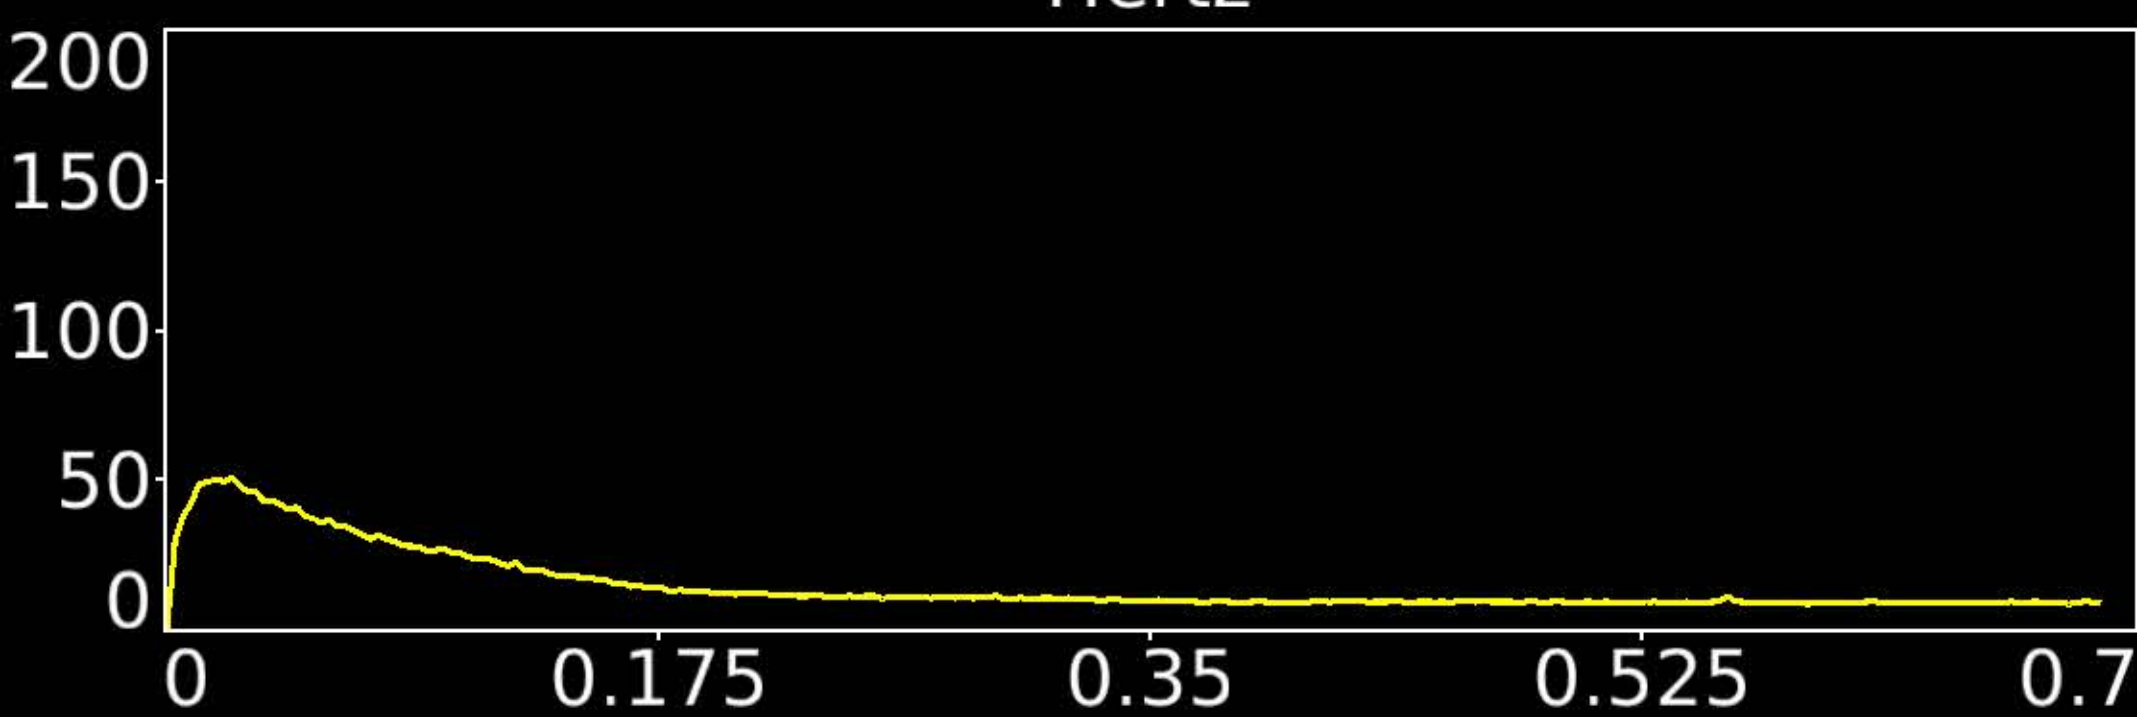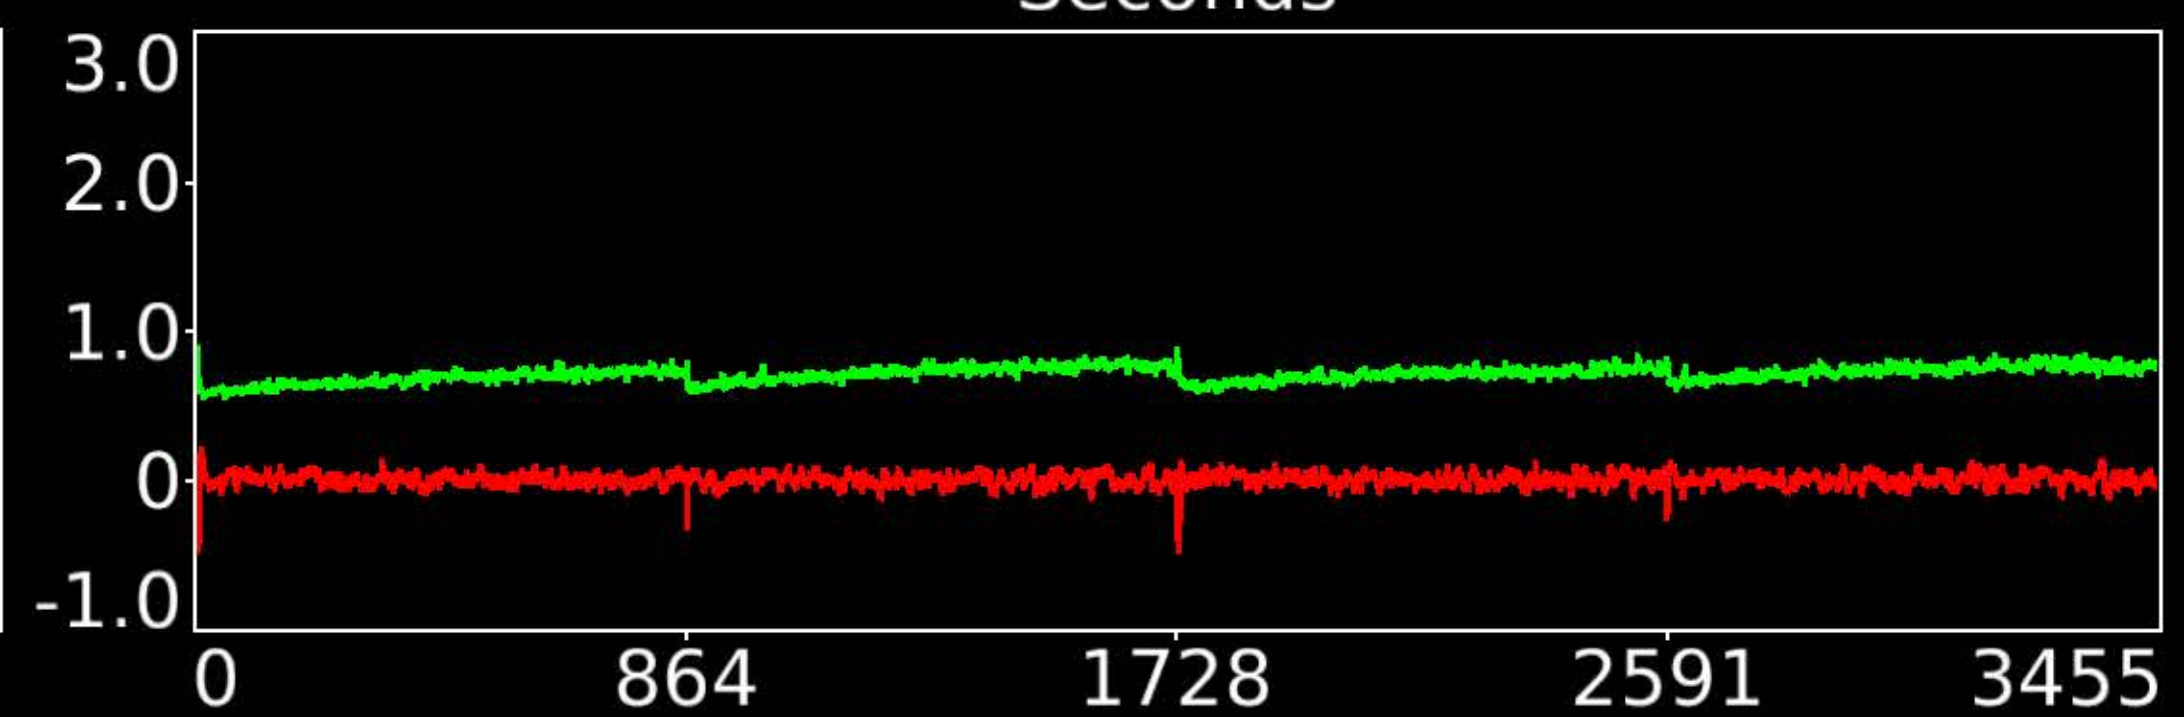

|                           |                            |                              |  |
|---------------------------|----------------------------|------------------------------|--|
| Number & Class: 42 Signal |                            | Name: Pan Visual ParaCentral |  |
| RVT Correlated: No        | DVARS Dip Associated: No   | Cross-Subject Variable: No   |  |
| Single Subject: No        | % Variance Explained: 0.79 | Globality Index: 0.46        |  |
| Task Component: No        | Taskr Component: 49        | Sleep Noted: No              |  |

Rationale: Spatial map includes positive and negative patches that respect known retinotopic visual organization (ParaCentral vs Peripheral)



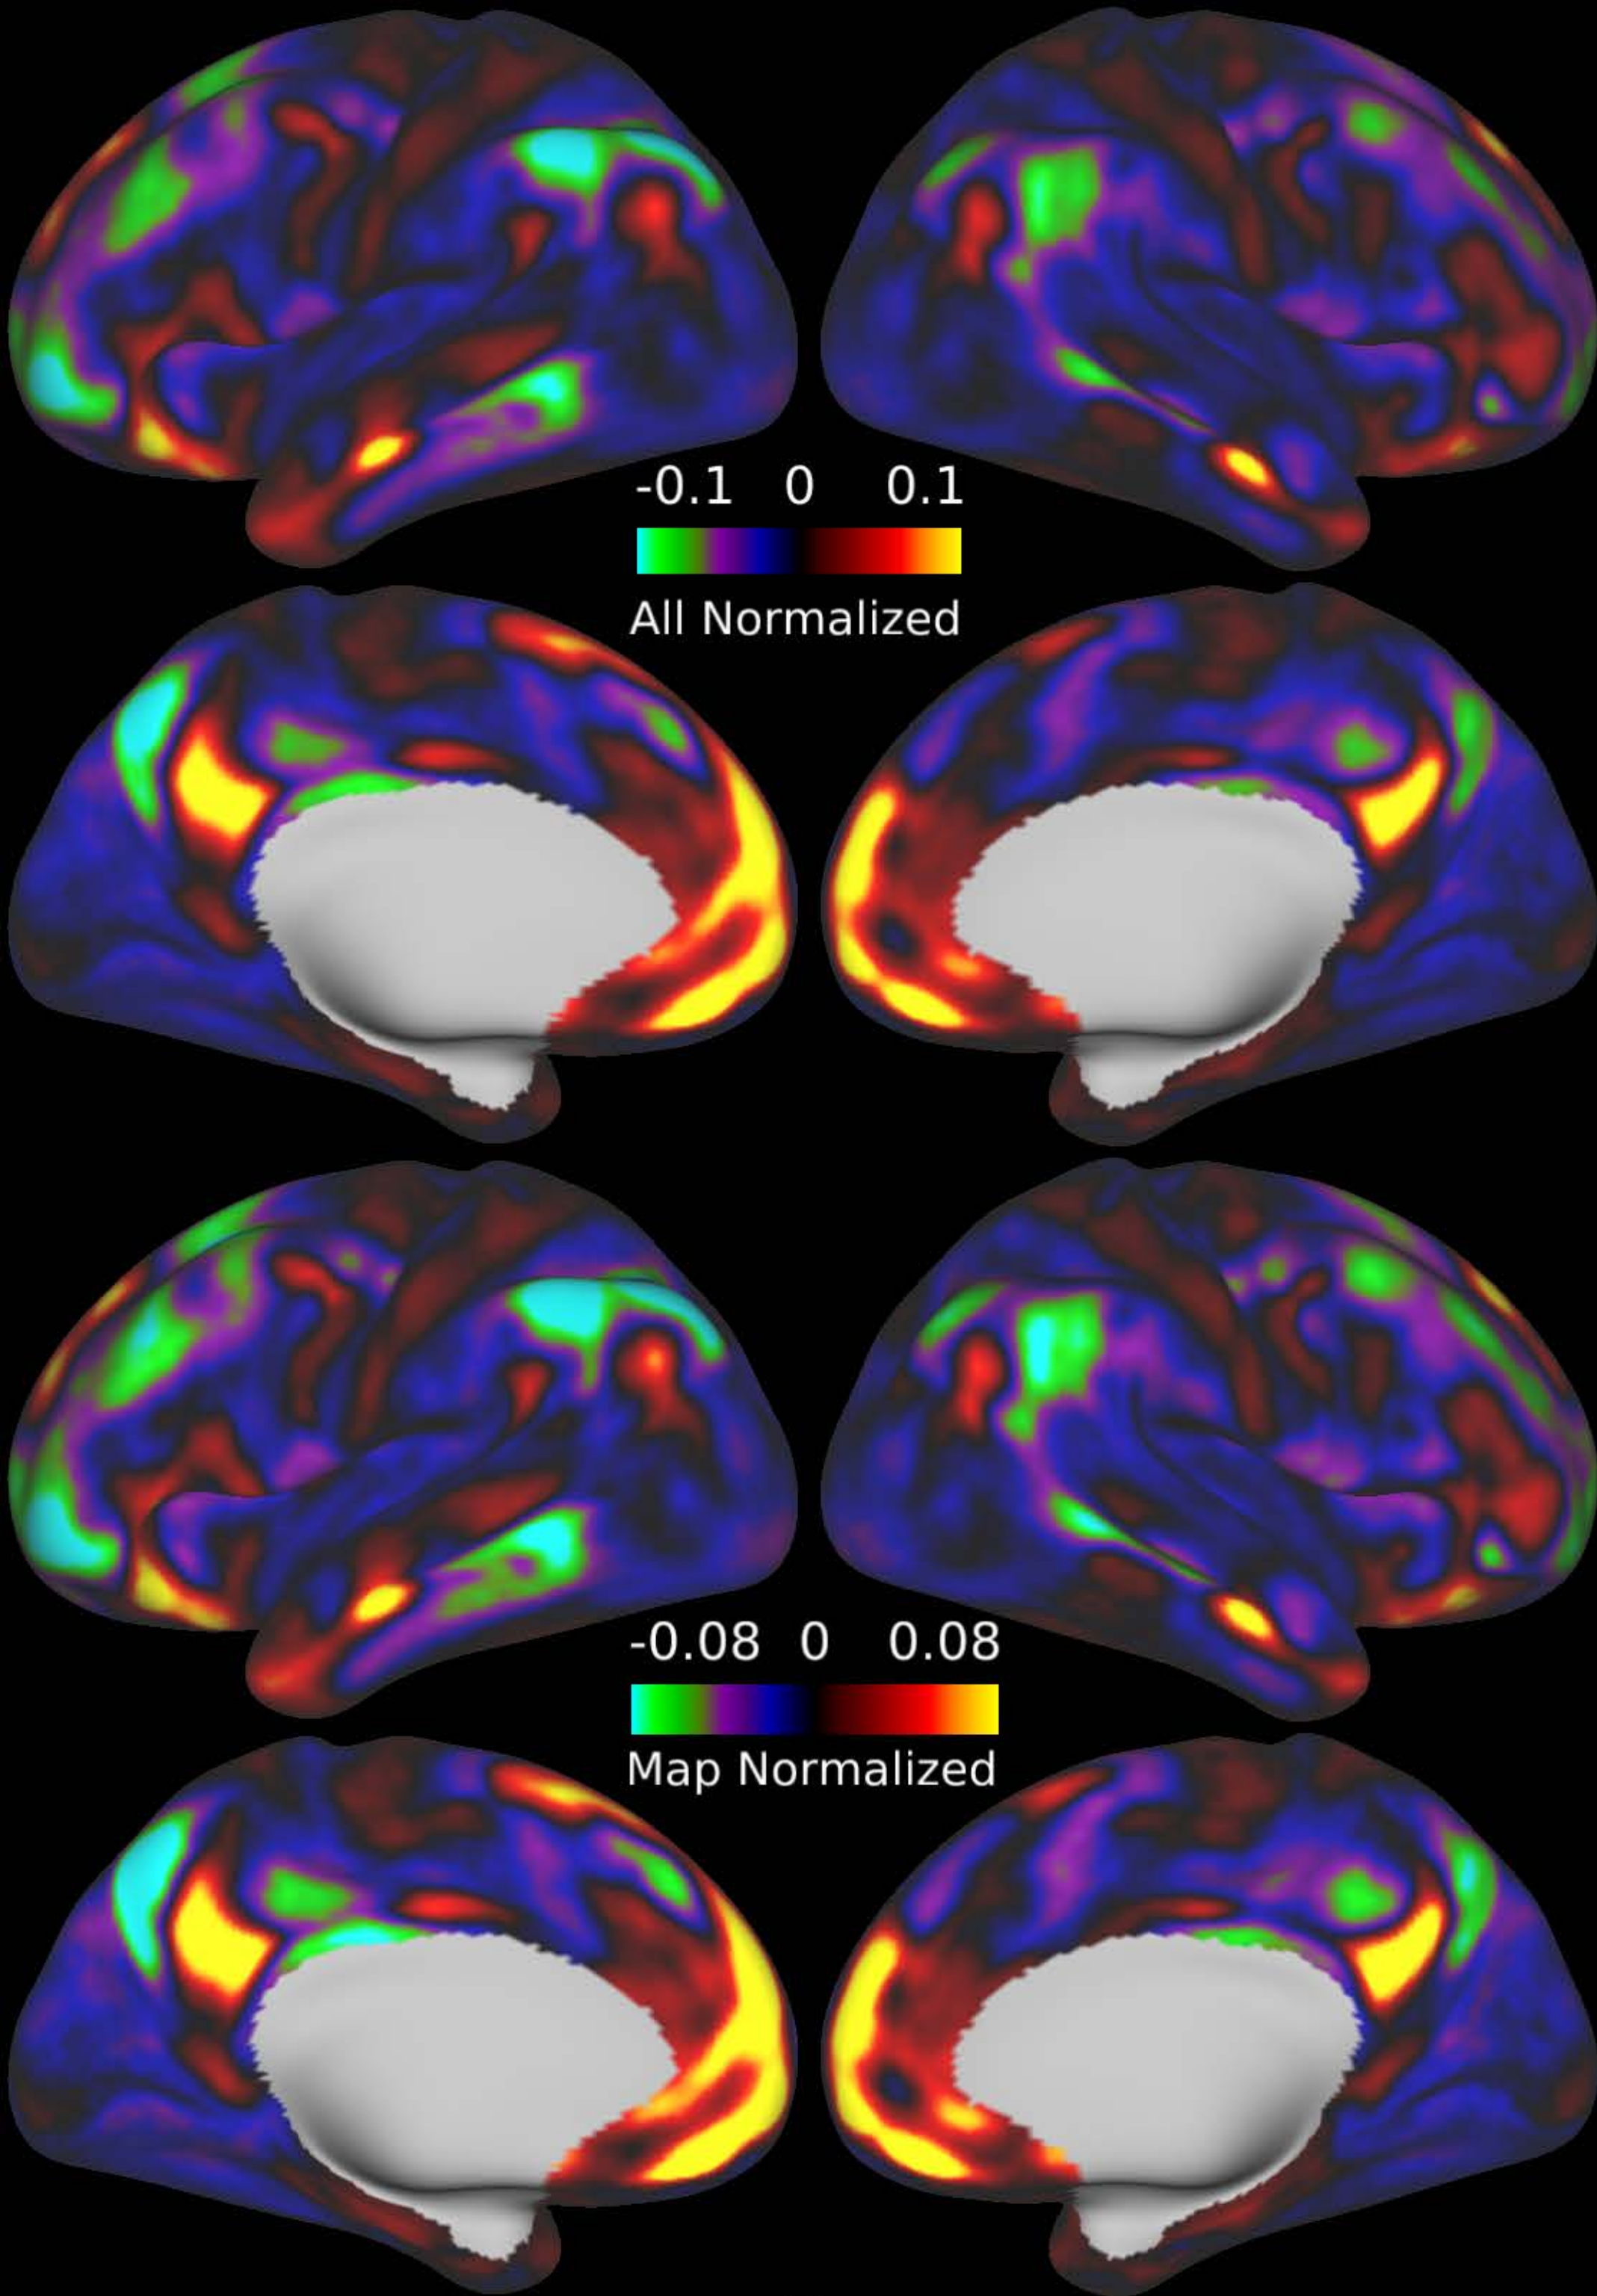

Hertz

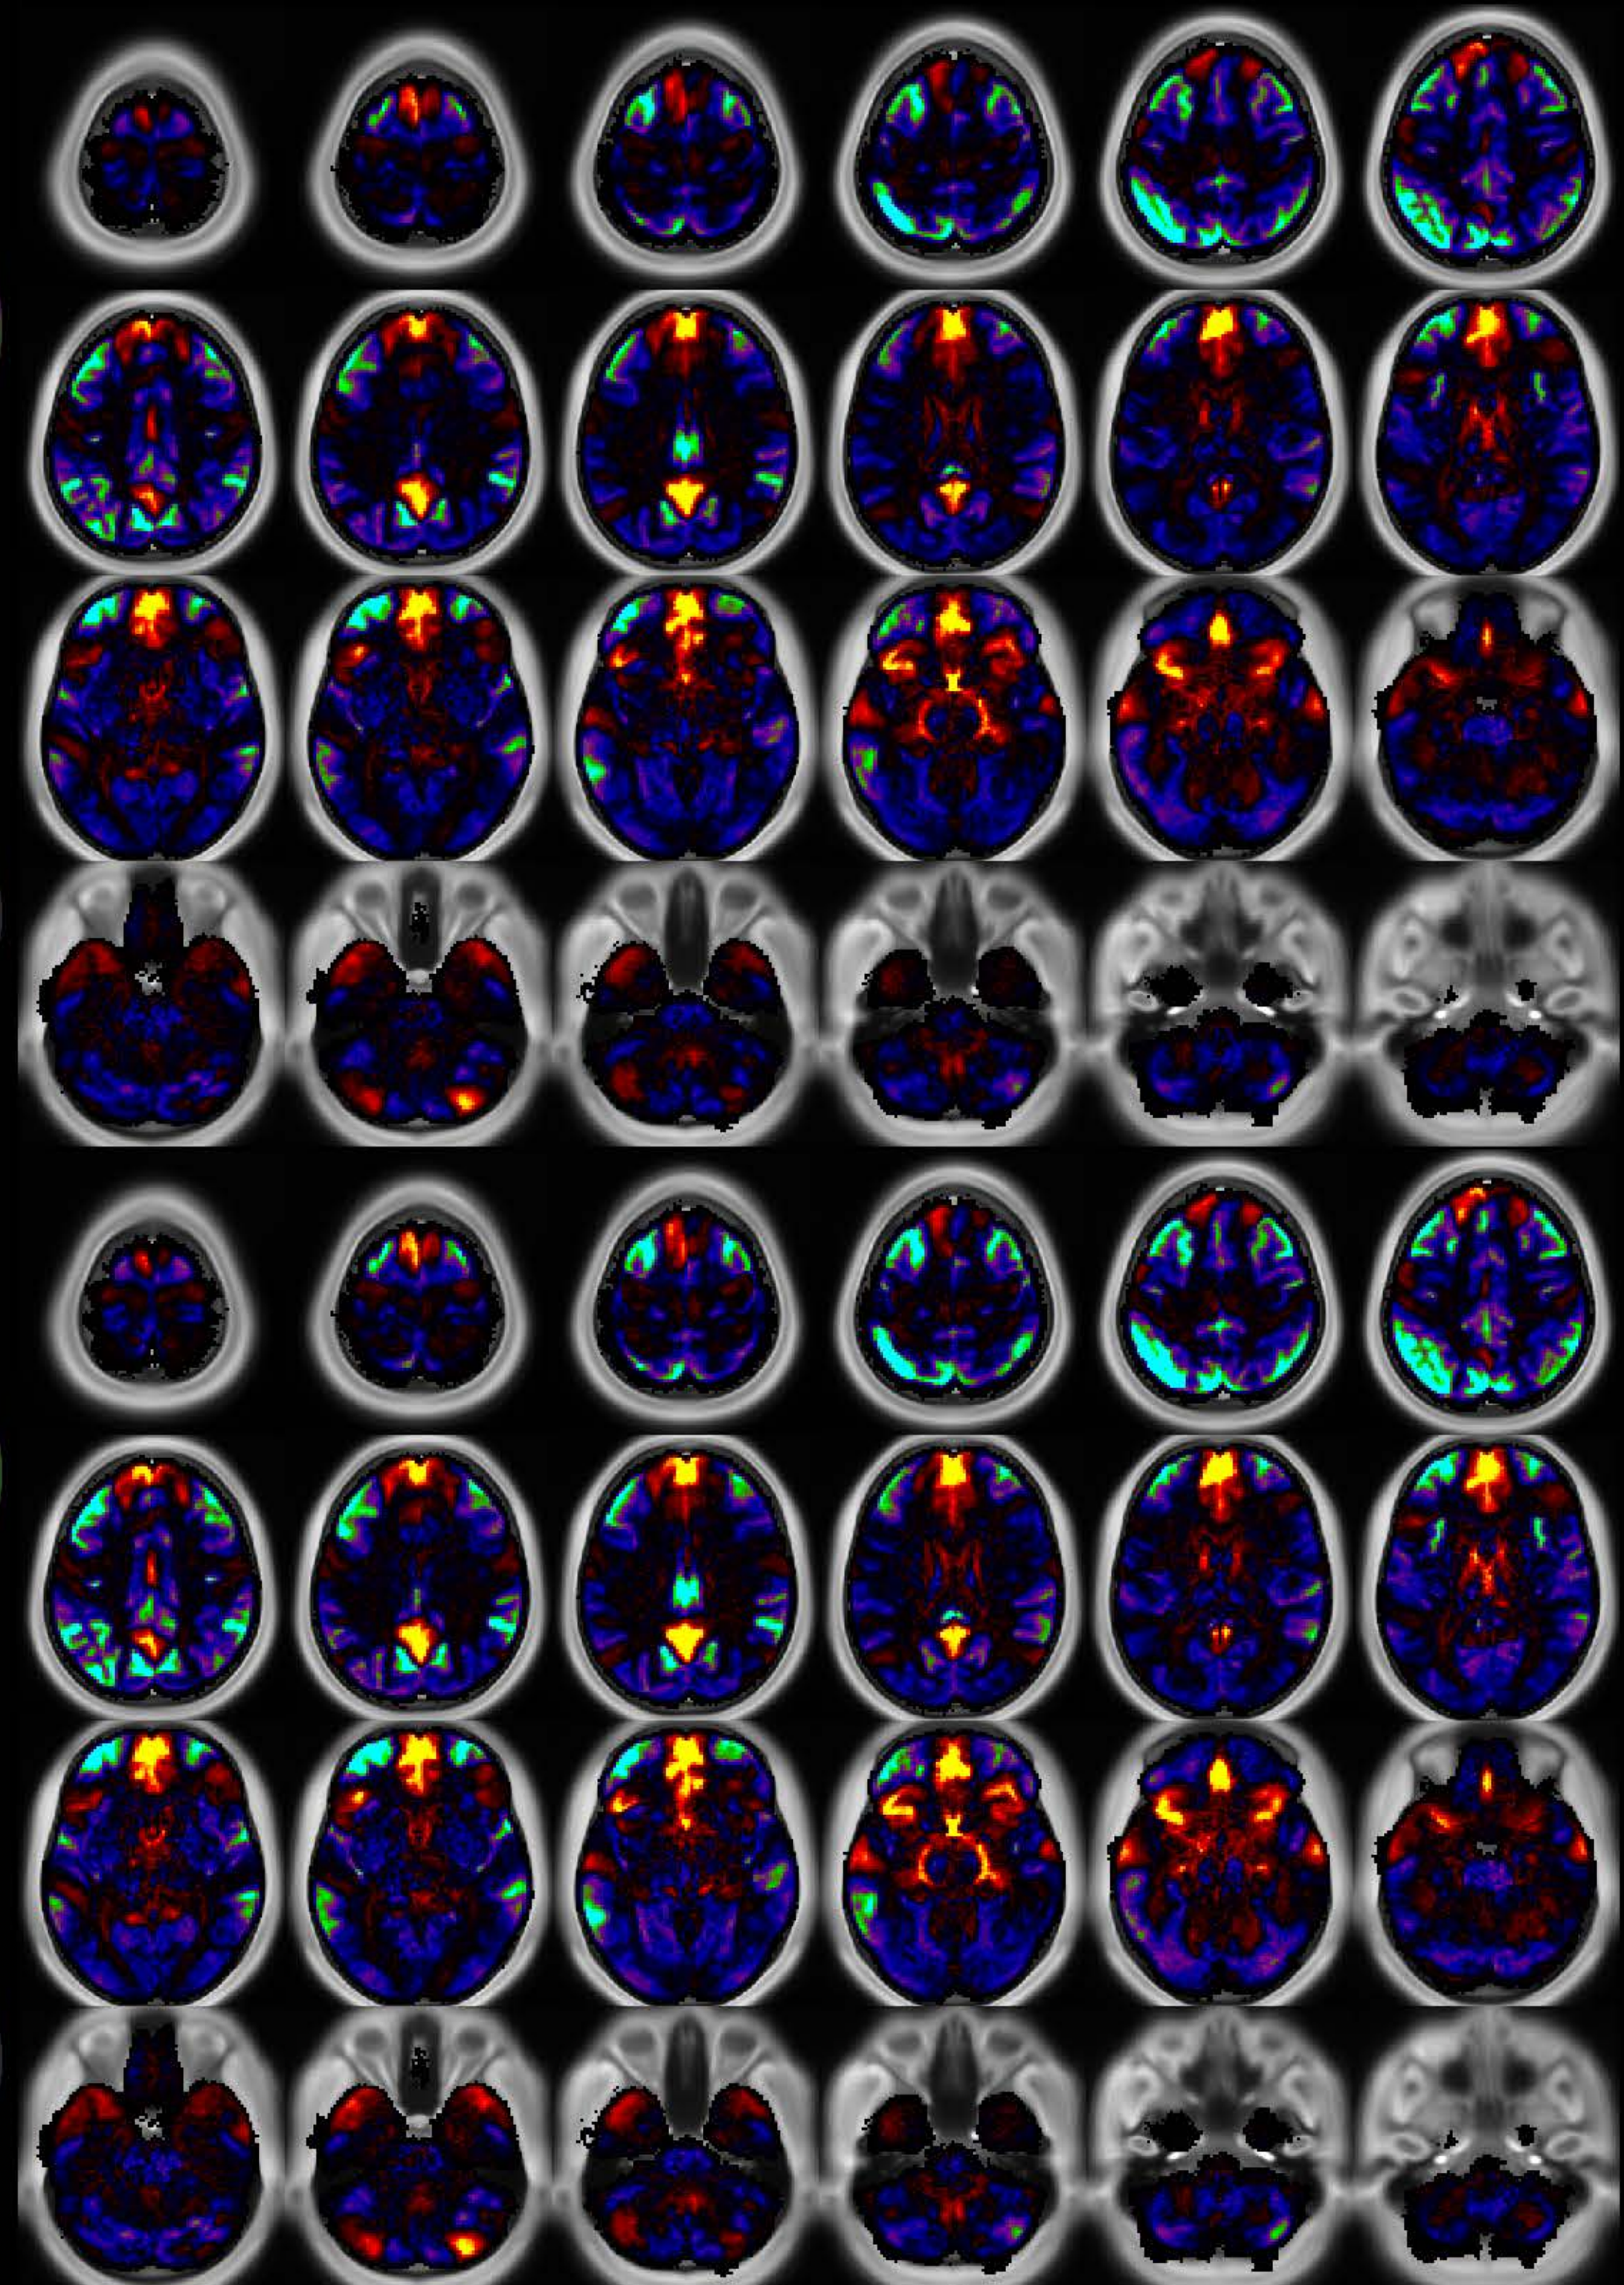

Seconds

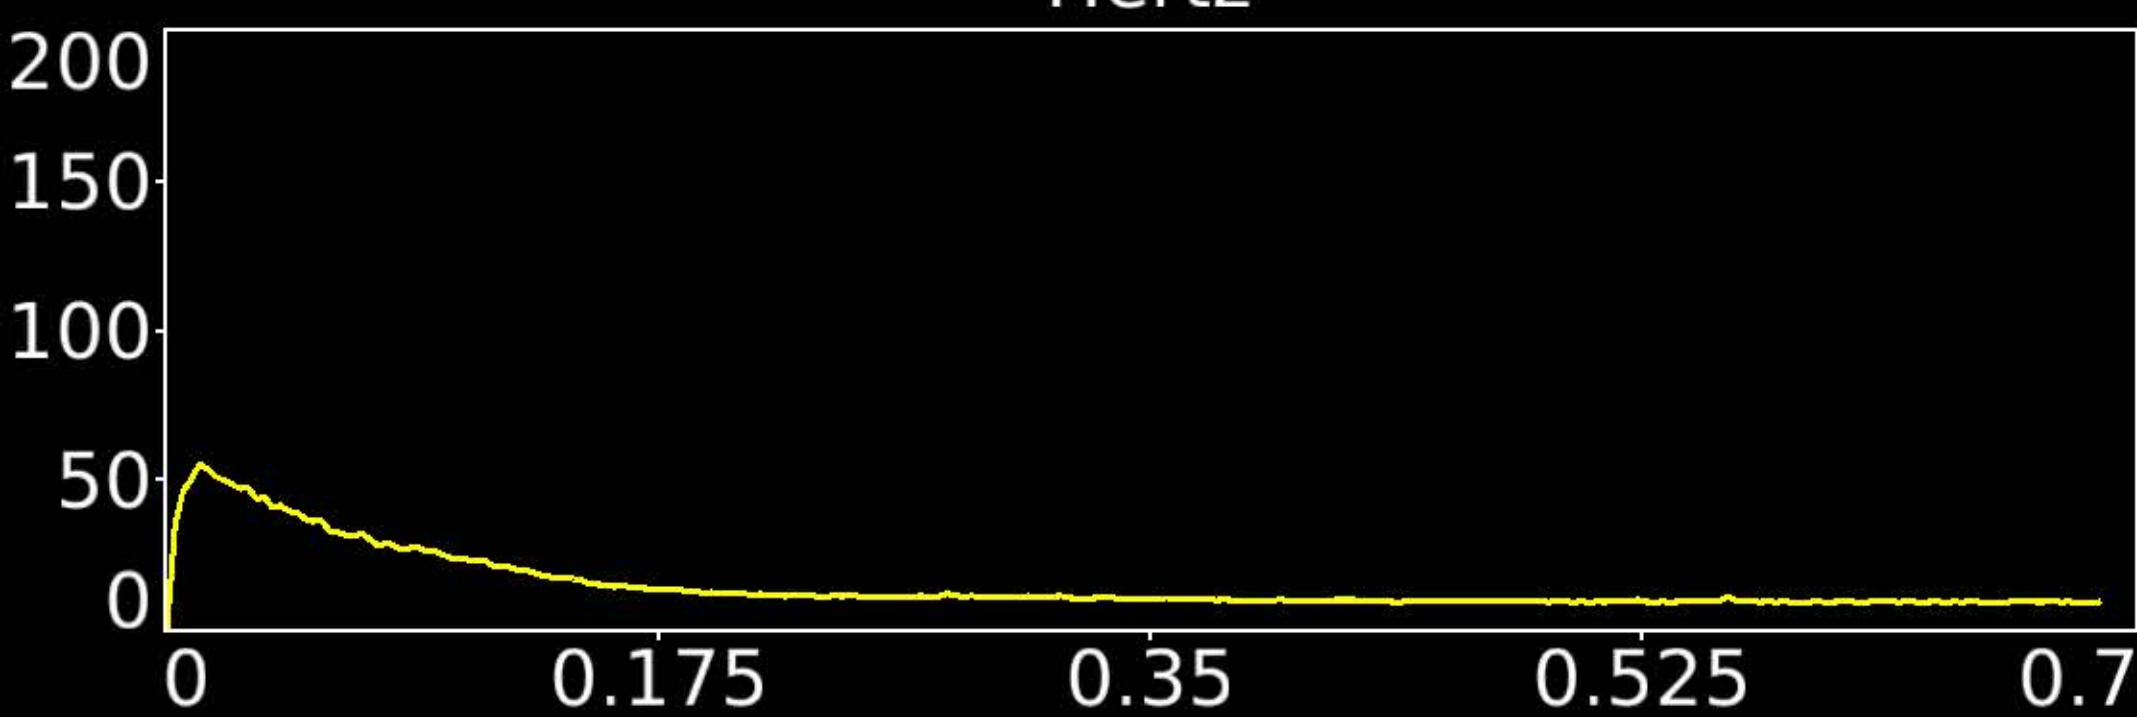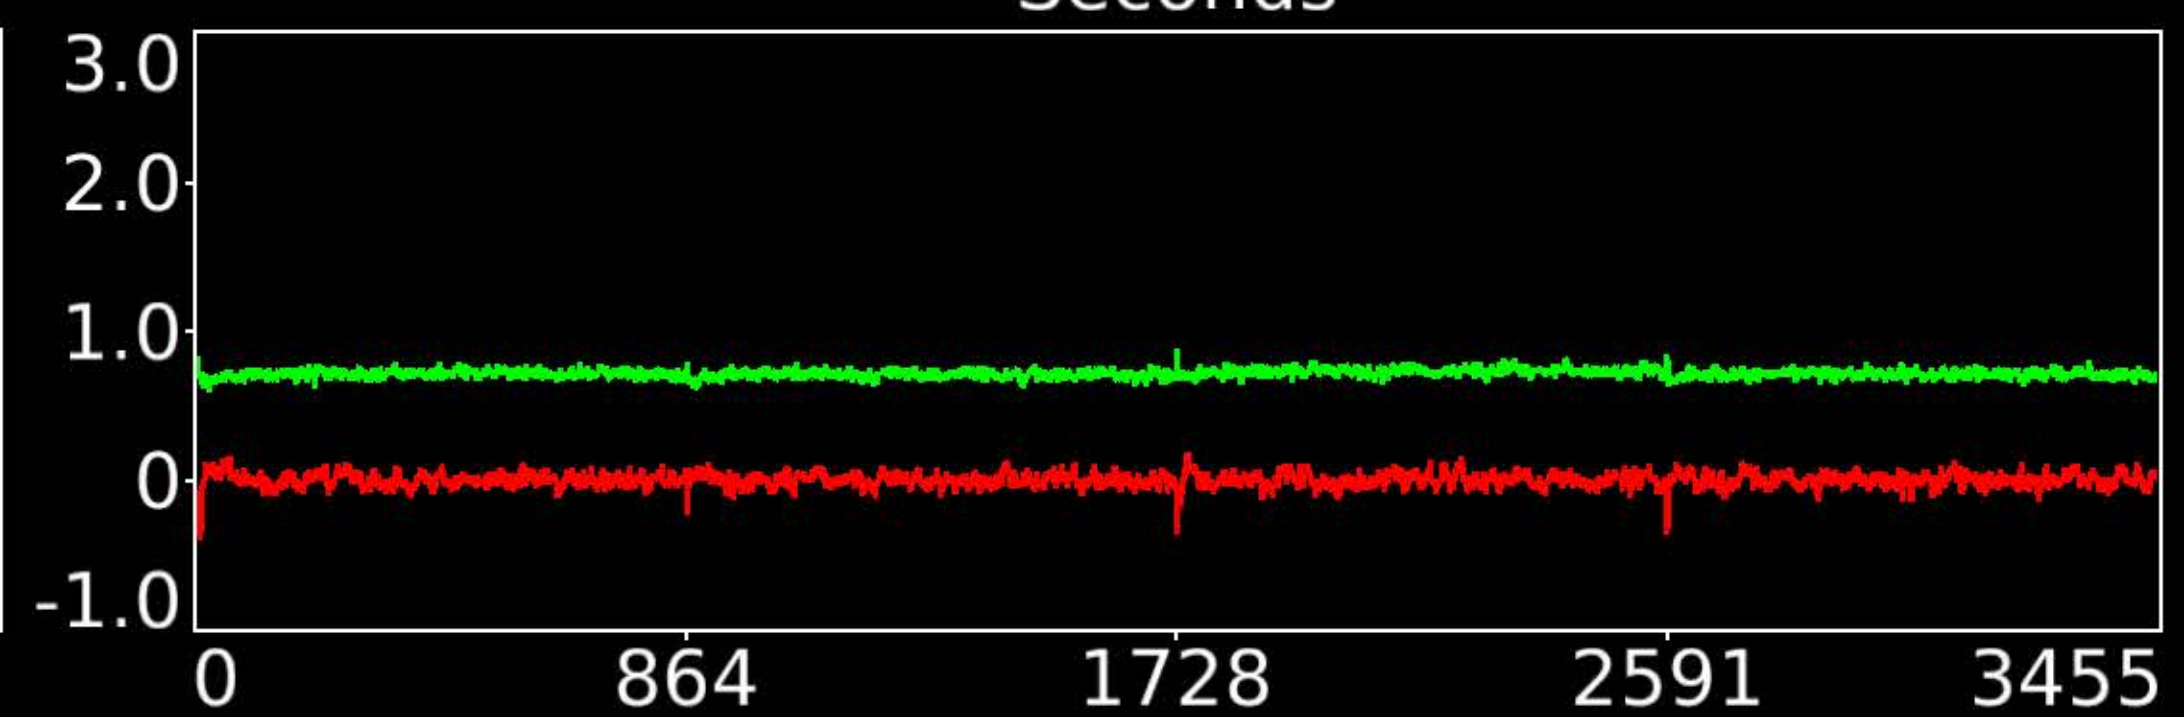

|                                                                                                                   |                            |                               |  |
|-------------------------------------------------------------------------------------------------------------------|----------------------------|-------------------------------|--|
| Number & Class: 43 Signal                                                                                         |                            | Name: Subsidiary Default Mode |  |
| RVT Correlated: No                                                                                                | DVARS Dip Associated: No   | Cross-Subject Variable: No    |  |
| Single Subject: No                                                                                                | % Variance Explained: 0.78 | Globality Index: 0.92         |  |
| Task Component: No                                                                                                | Taskr Component: No        | Sleep Noted: No               |  |
| Rationale: Spatial map includes positive and negative patches that respect known RSNs (e.g. Default Mode Network) |                            |                               |  |



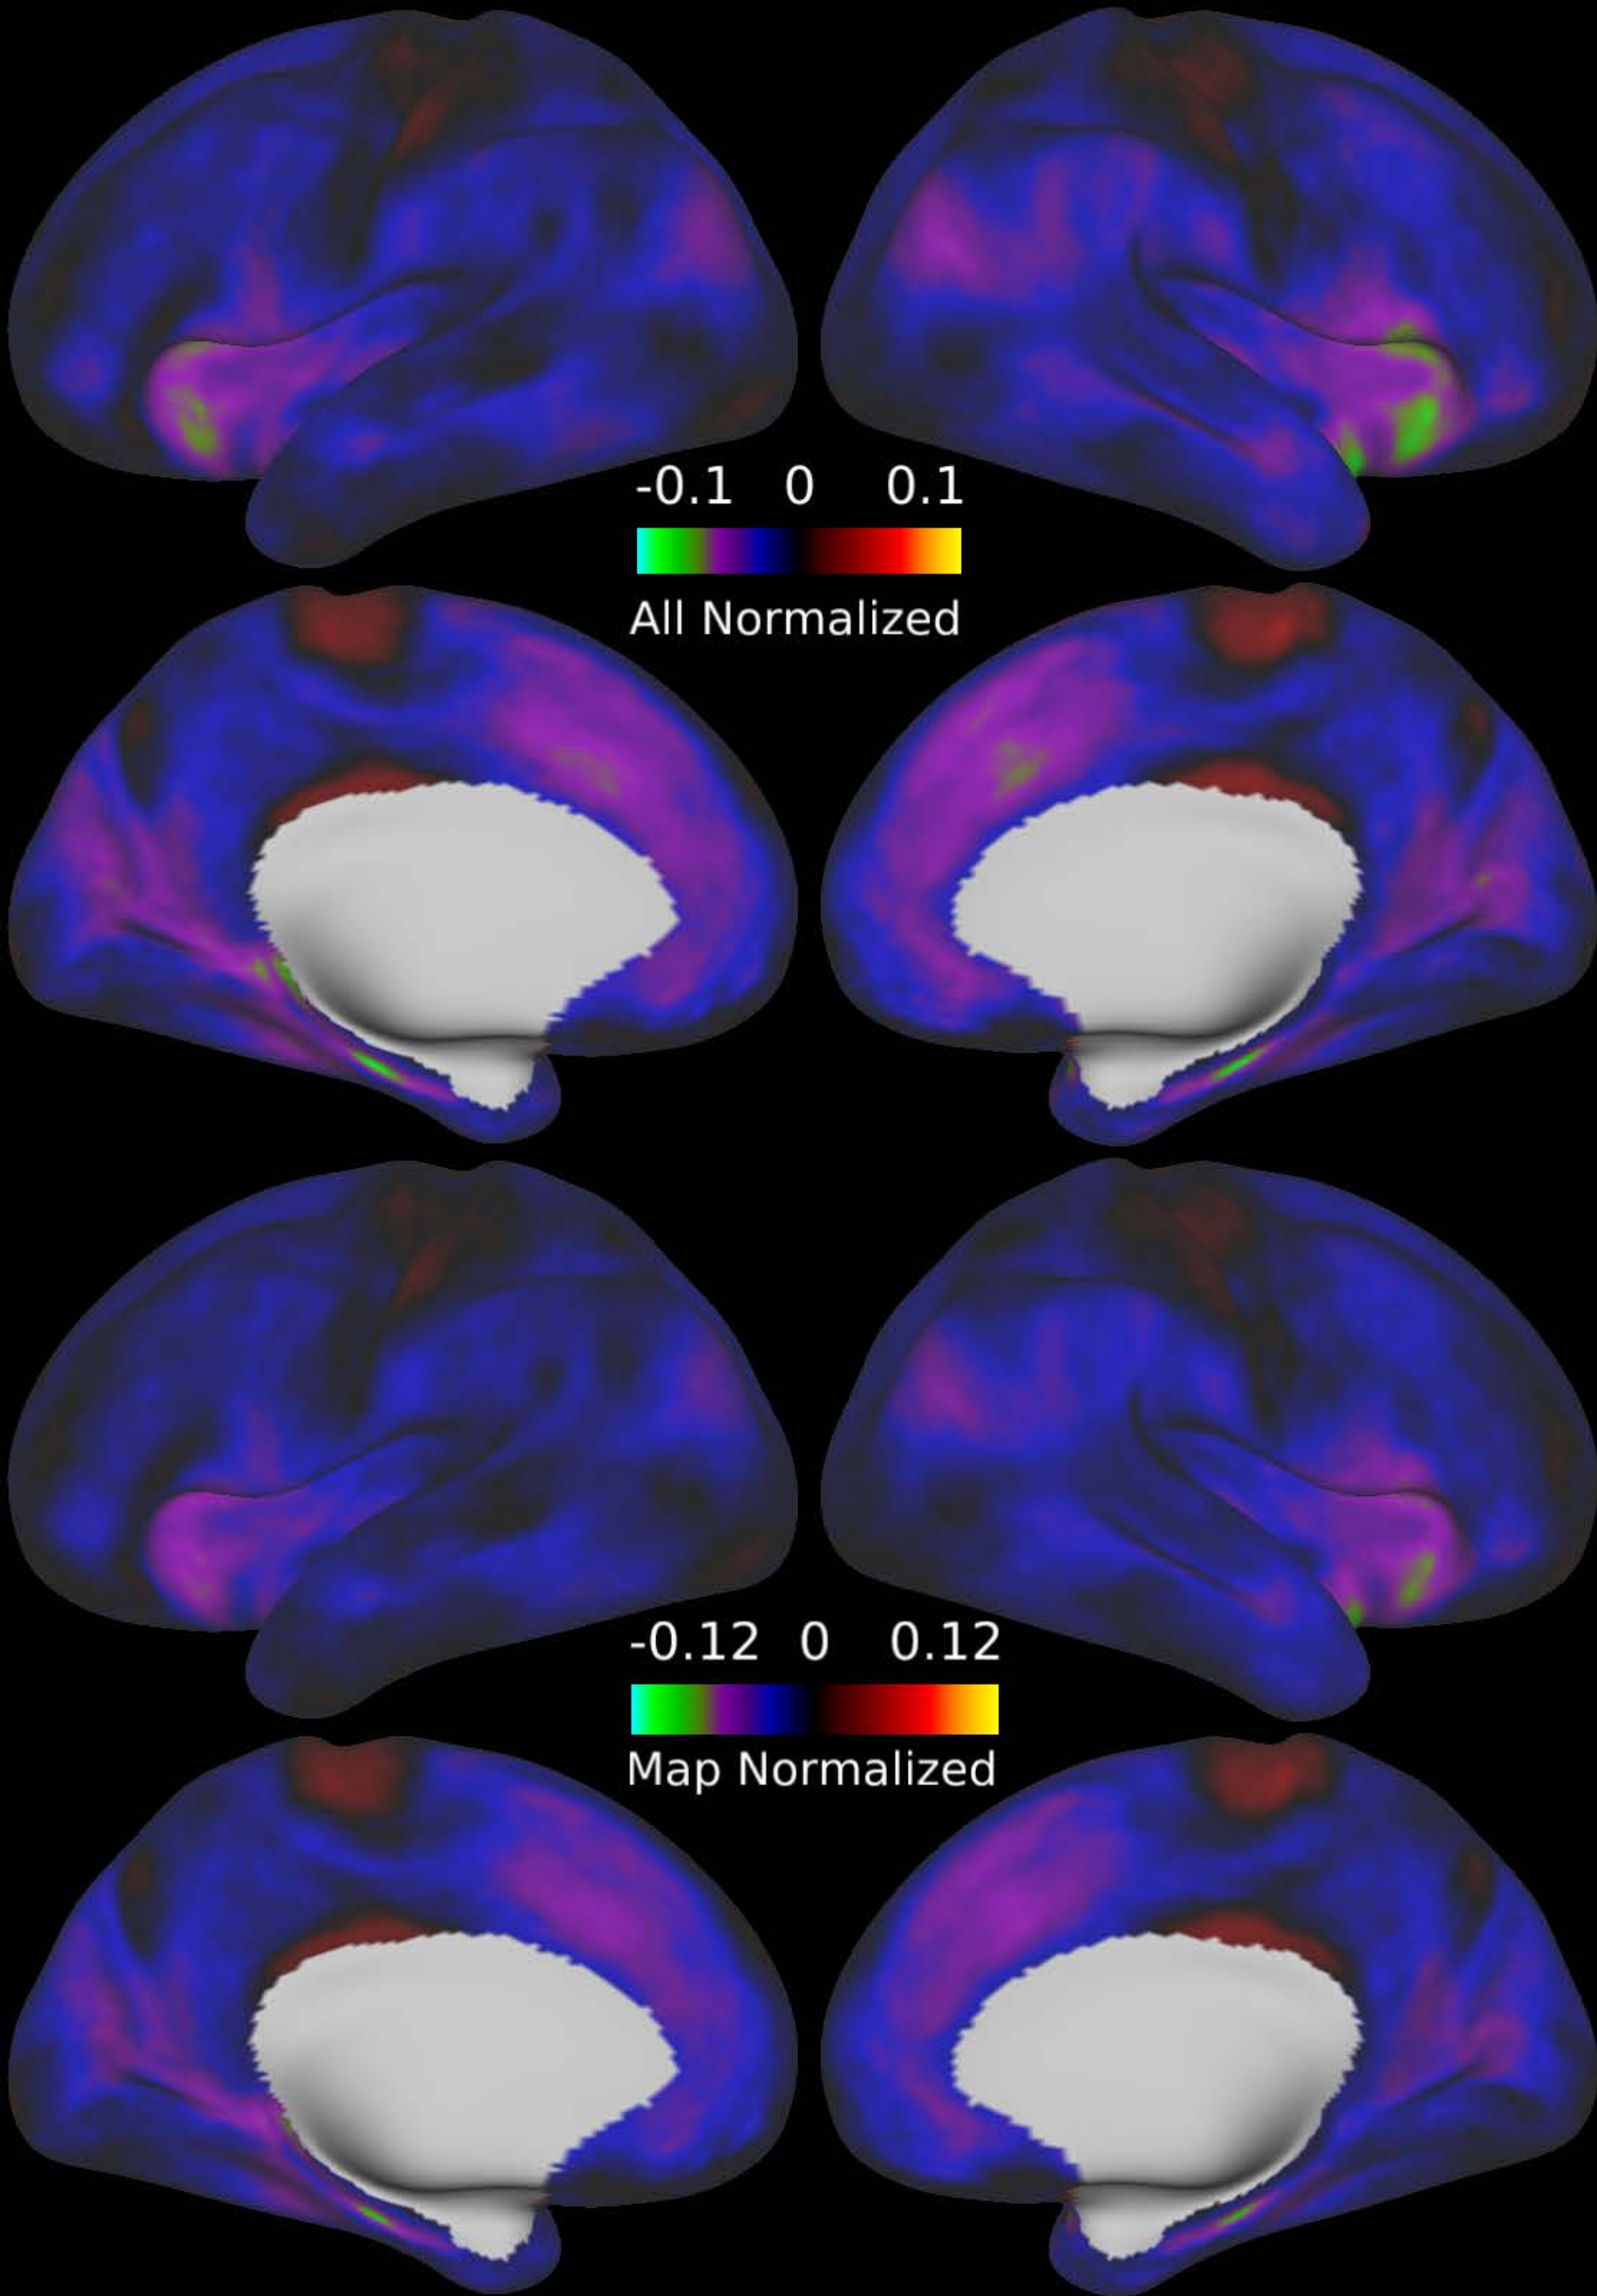

Hertz

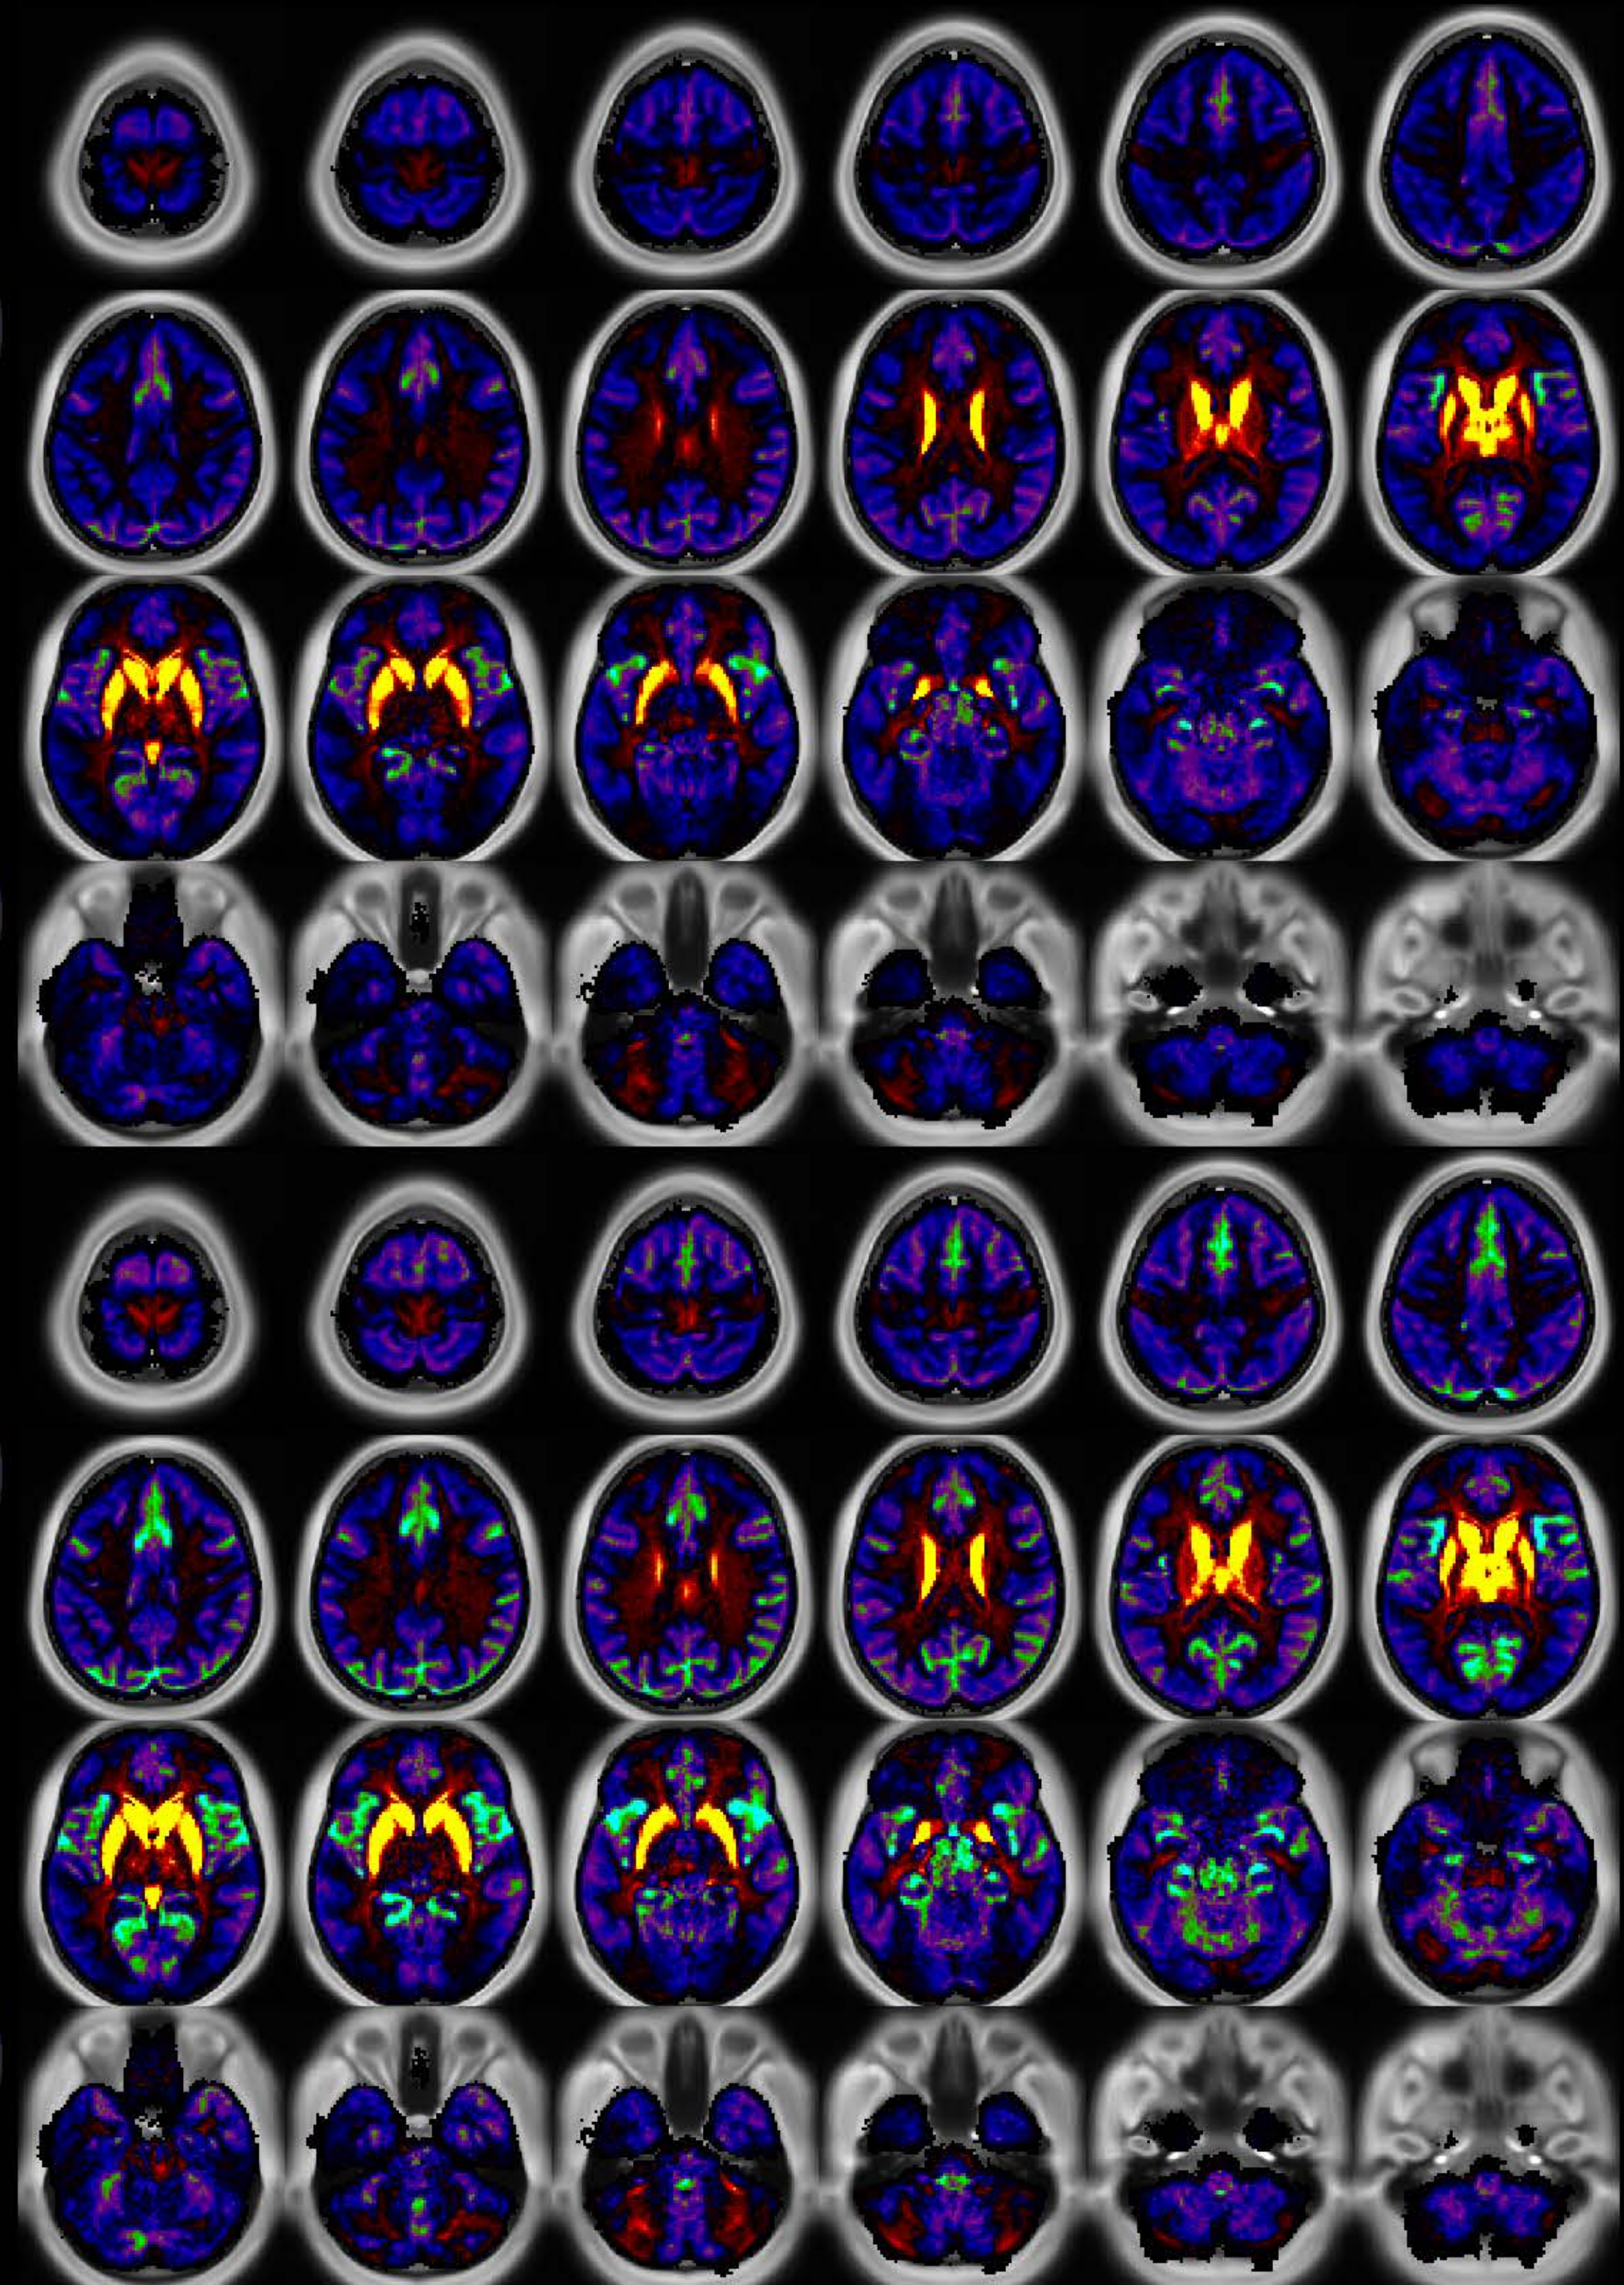

Seconds

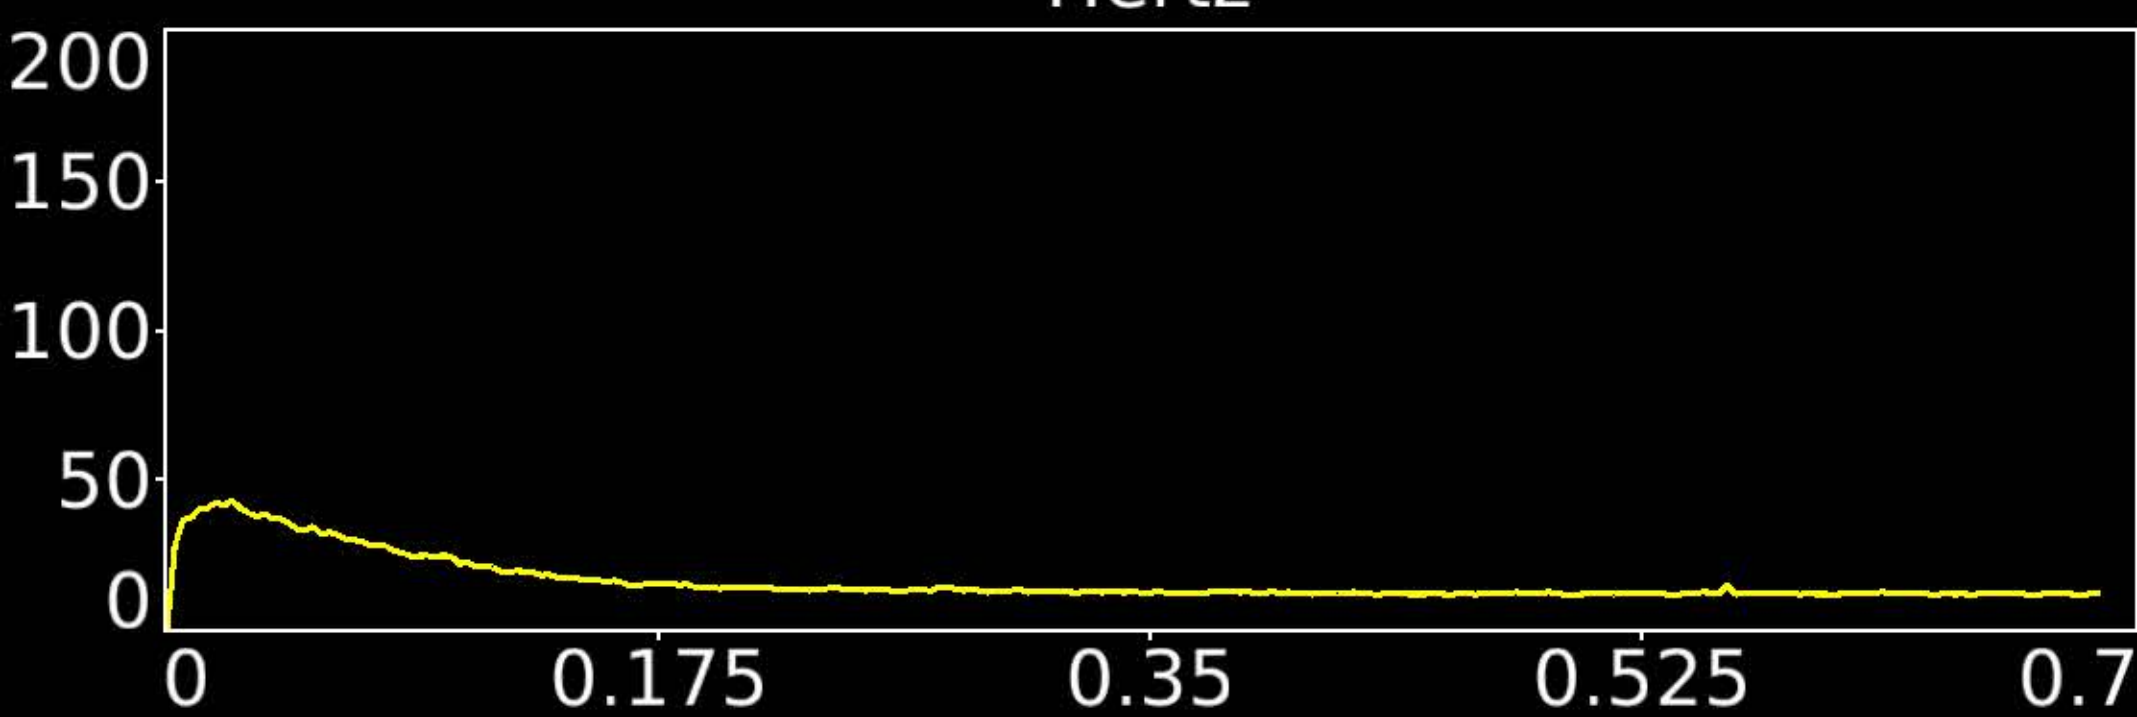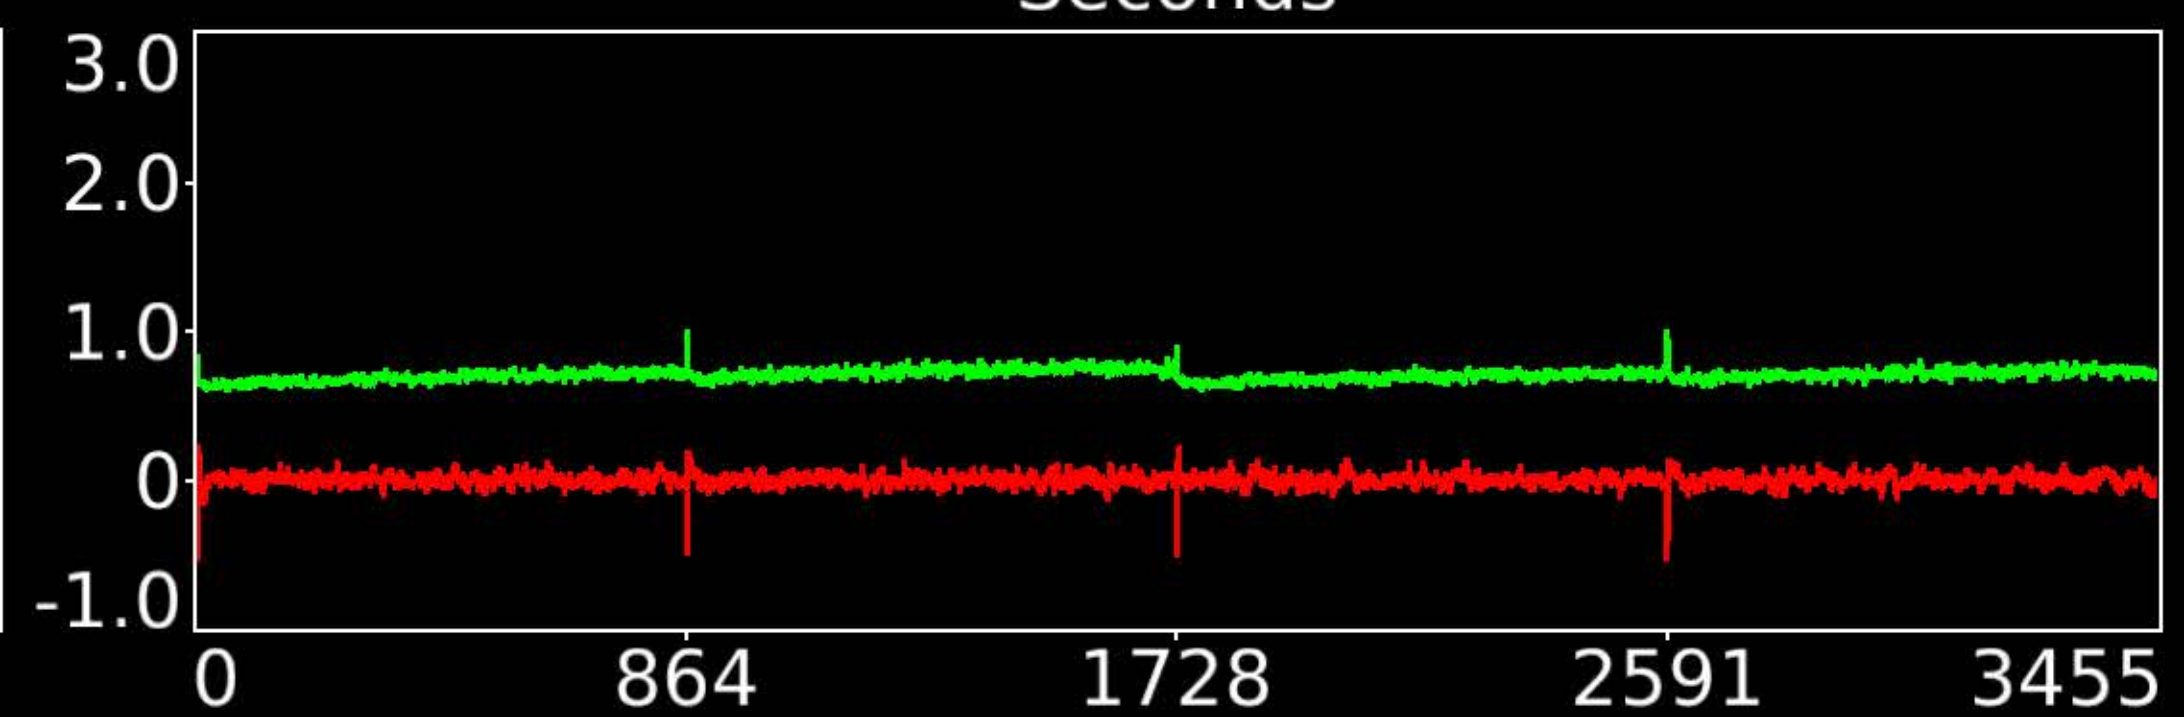

|                          |                                                    |                            |
|--------------------------|----------------------------------------------------|----------------------------|
| Number & Class: 44 Noise | Name: Striatum and Dorsal + Anterior Thalamus + WM |                            |
| RVT Correlated: No       | DVARS Dip Associated: No                           | Cross-Subject Variable: No |
| Single Subject: No       | % Variance Explained: 0.76                         | Globality Index: 2.36      |
| Task Component: 42       | Taskr Component: 36                                | Sleep Noted: No            |

Rationale: Controversial: Diencephalon together with surrounding white matter positive vs rest of brain negative; could be due to differing vascular supplies



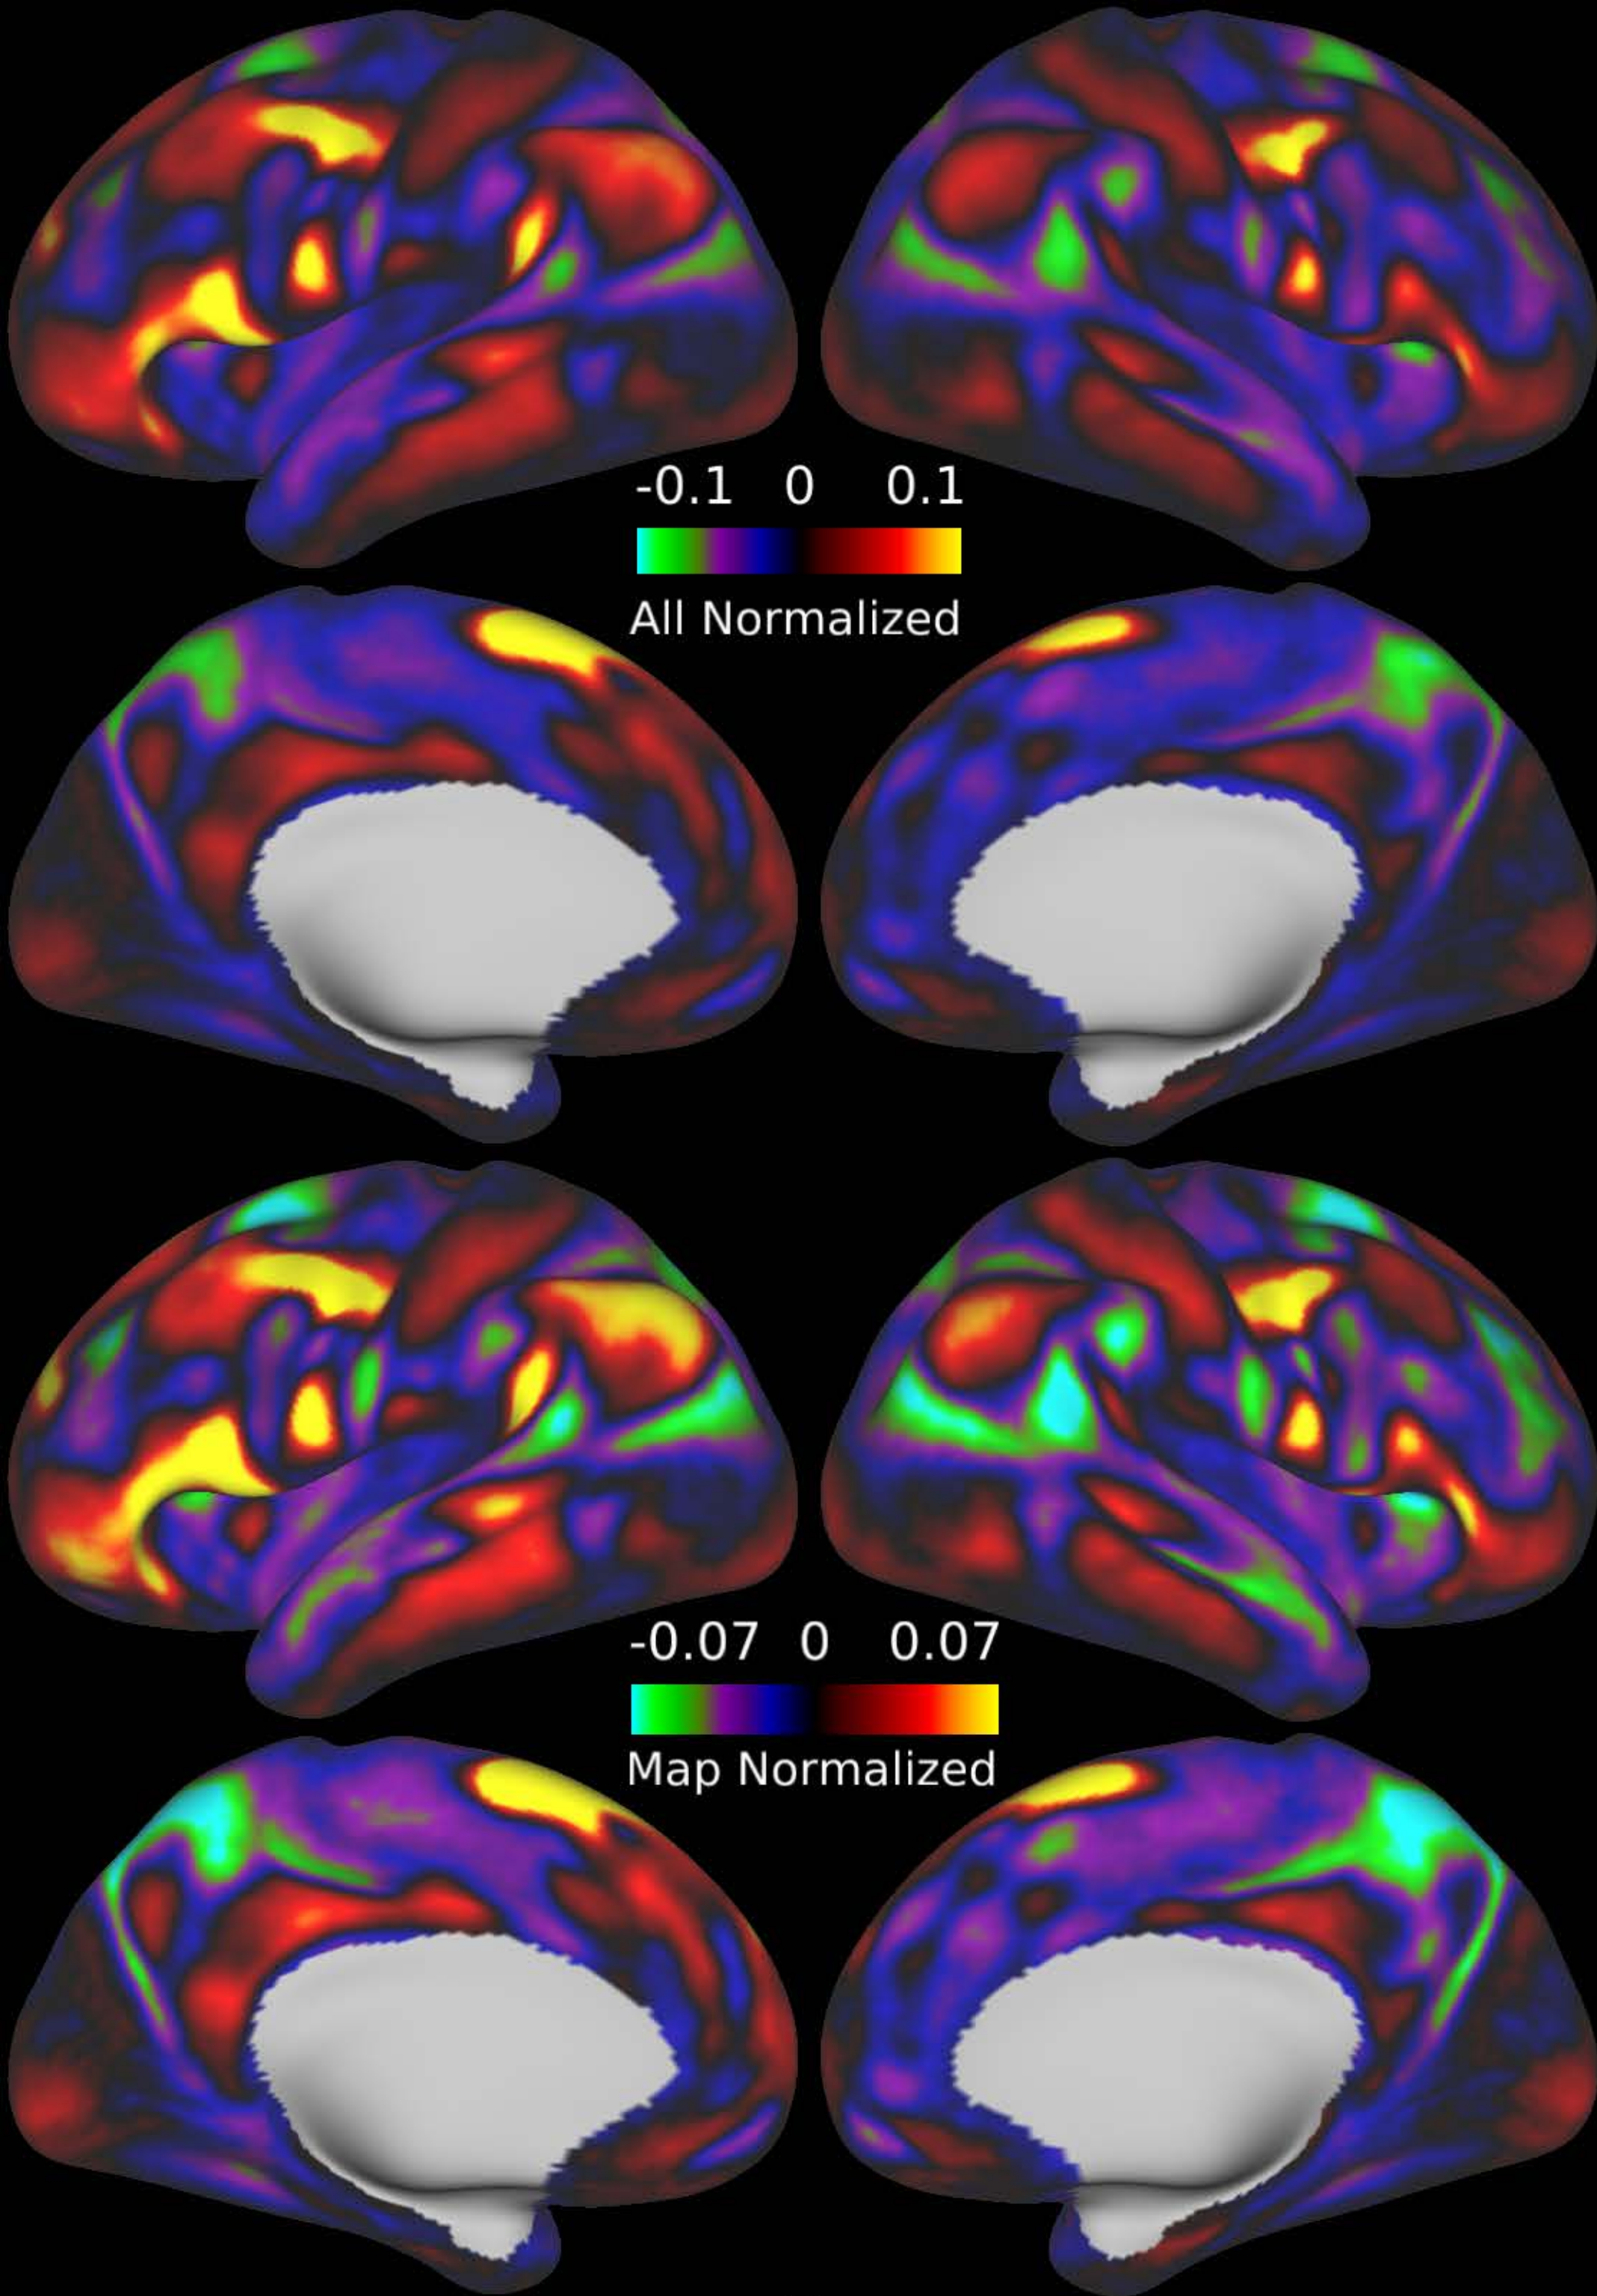

Hertz

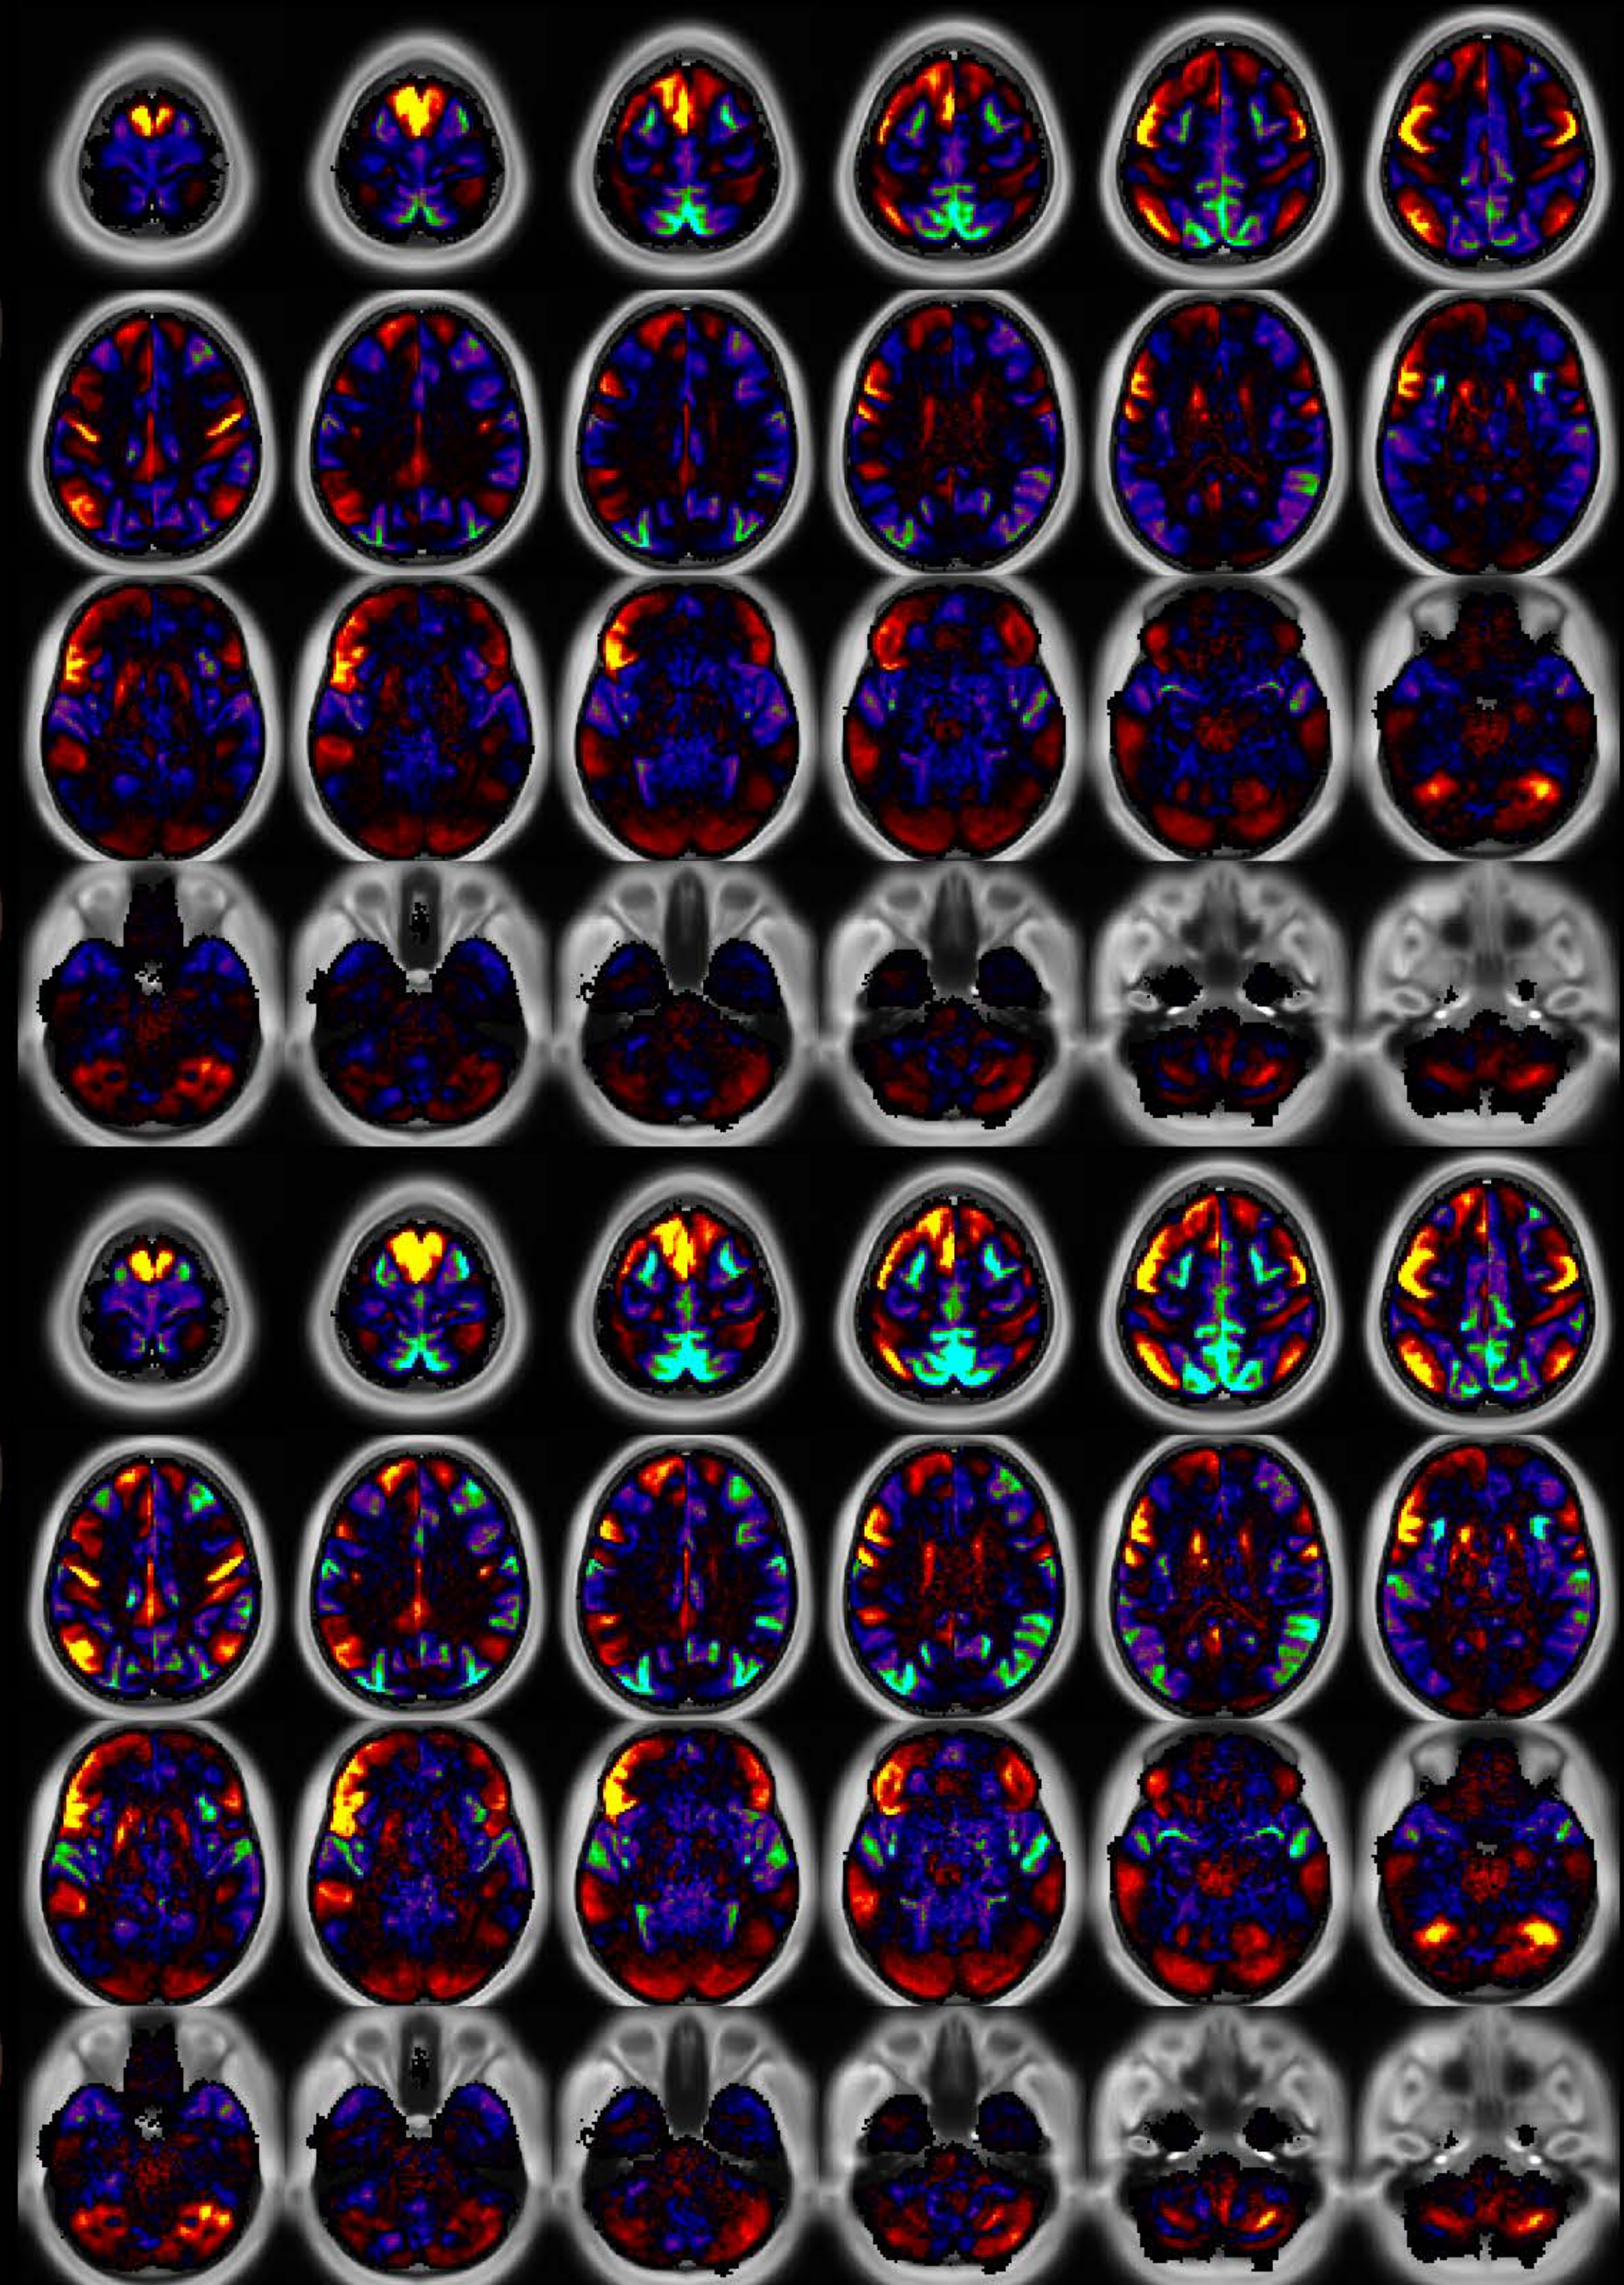

Seconds

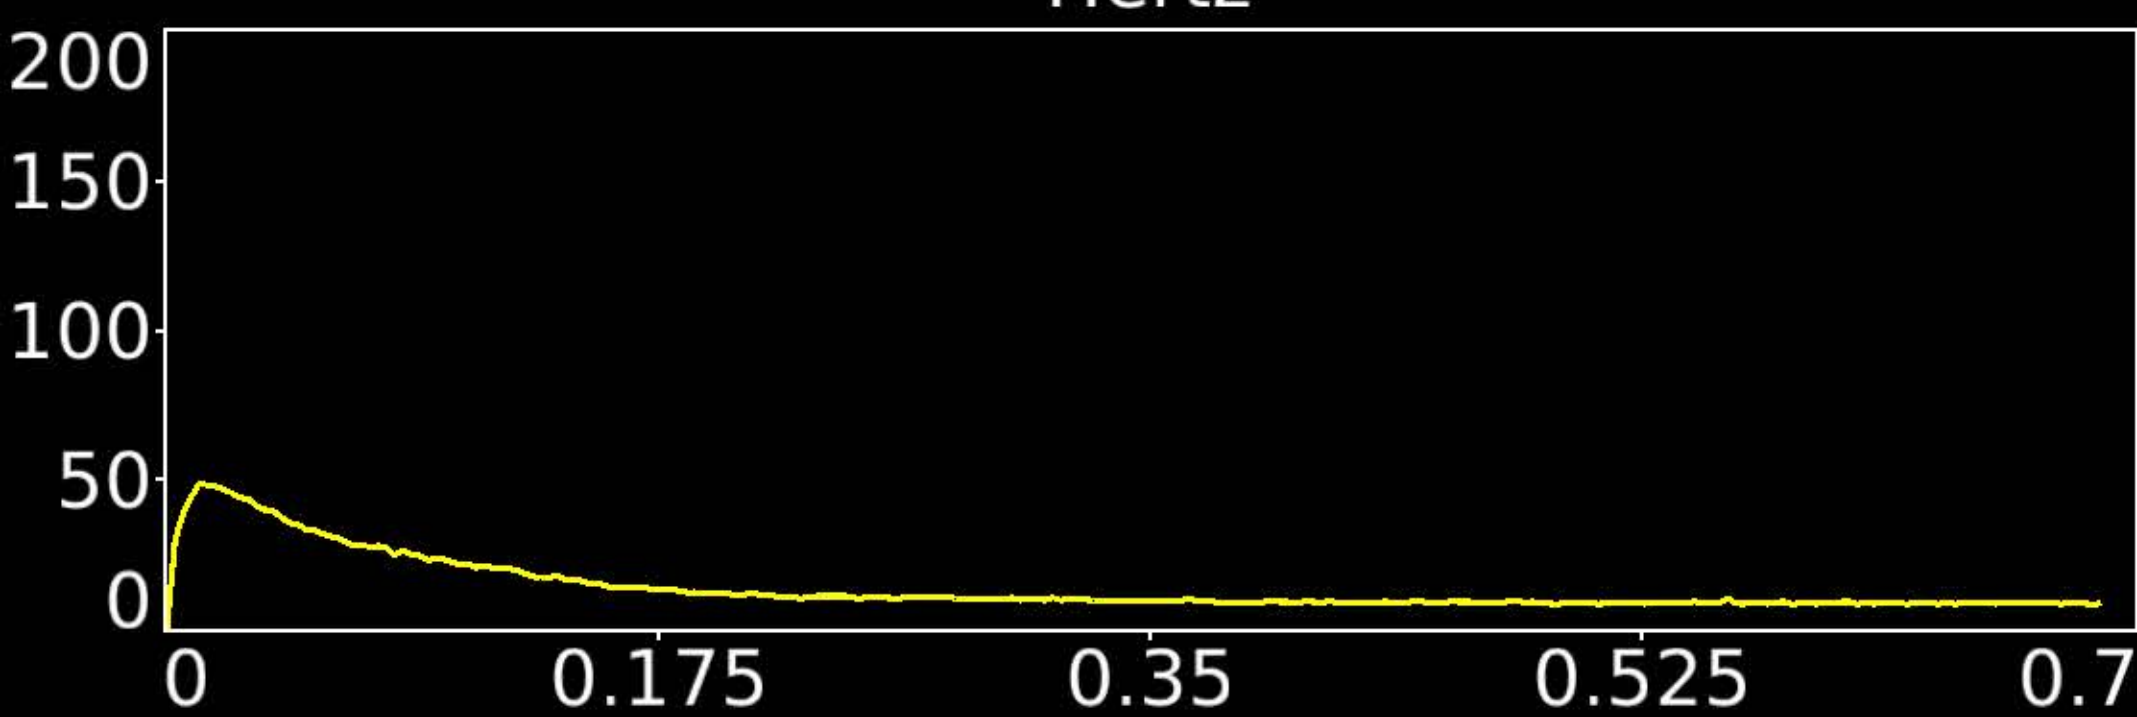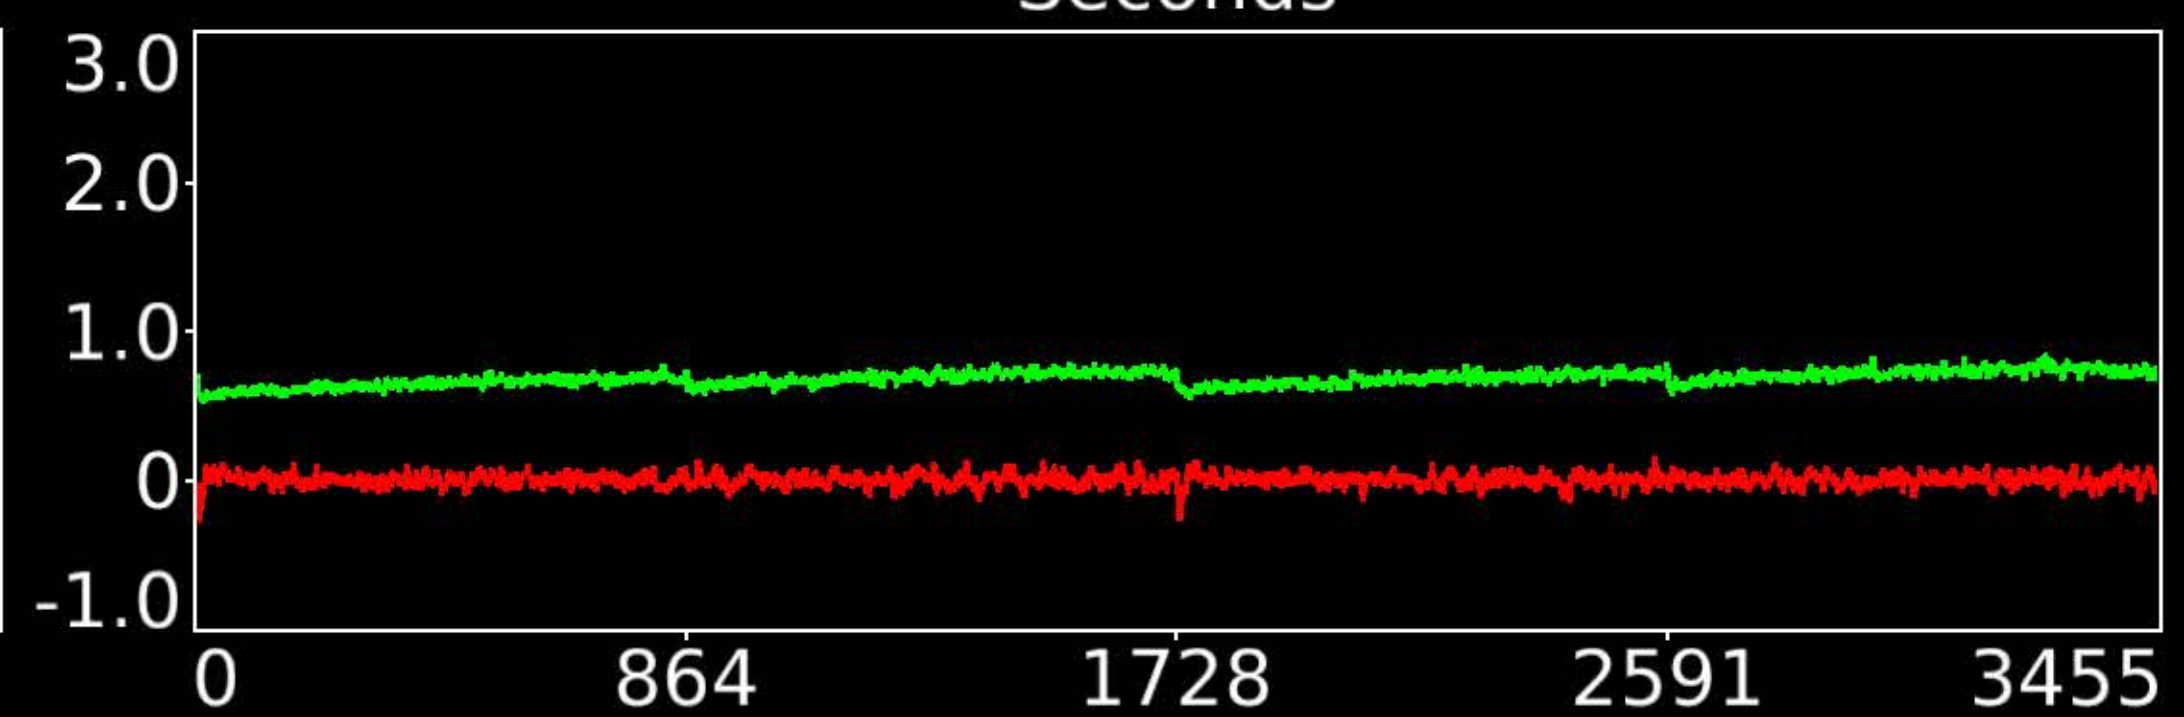

|                           |                            |                                            |  |
|---------------------------|----------------------------|--------------------------------------------|--|
| Number & Class: 45 Signal |                            | Name: Left Lateralized Language Network II |  |
| RVT Correlated: No        | DVARS Dip Associated: No   | Cross-Subject Variable: No                 |  |
| Single Subject: No        | % Variance Explained: 0.73 | Globality Index: 0.47                      |  |
| Task Component: No        | Taskr Component: No        | Sleep Noted: No                            |  |

Rationale: Spatial map includes positive and negative patches that respect known RSNs (e.g. Language Network) and areal boundaries (44; 45; 55b; PSL; SFL)



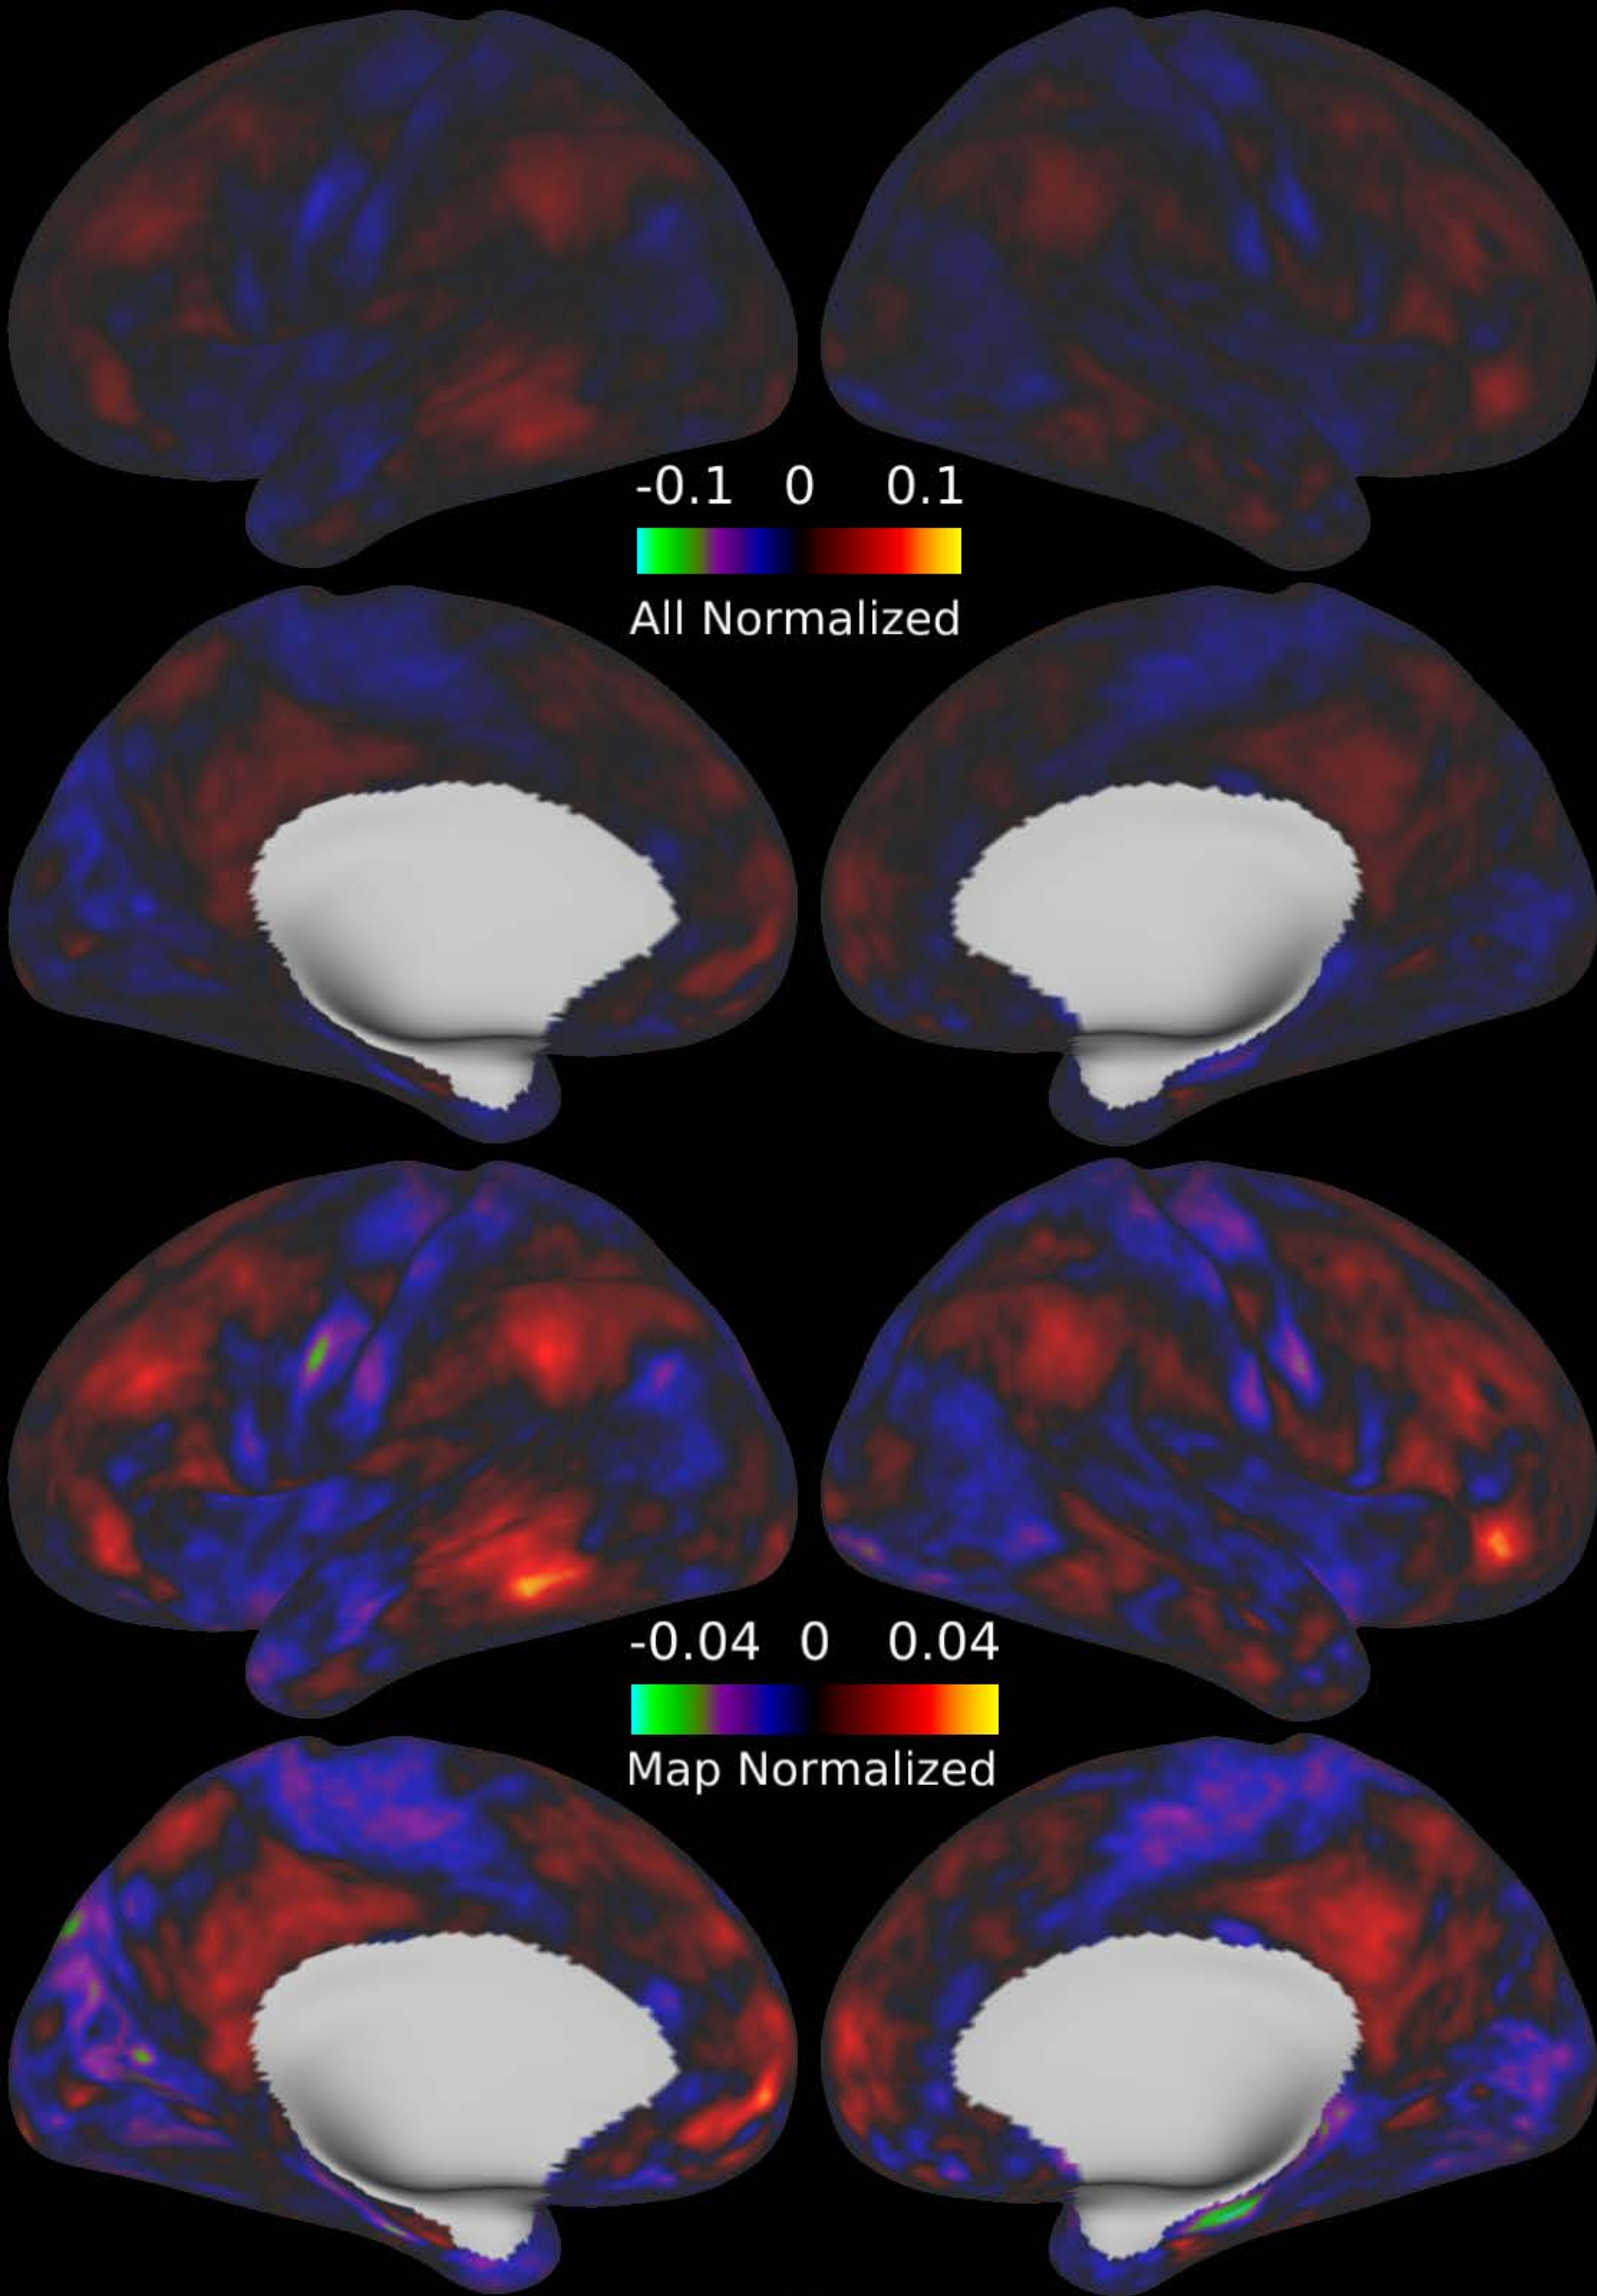

Hertz

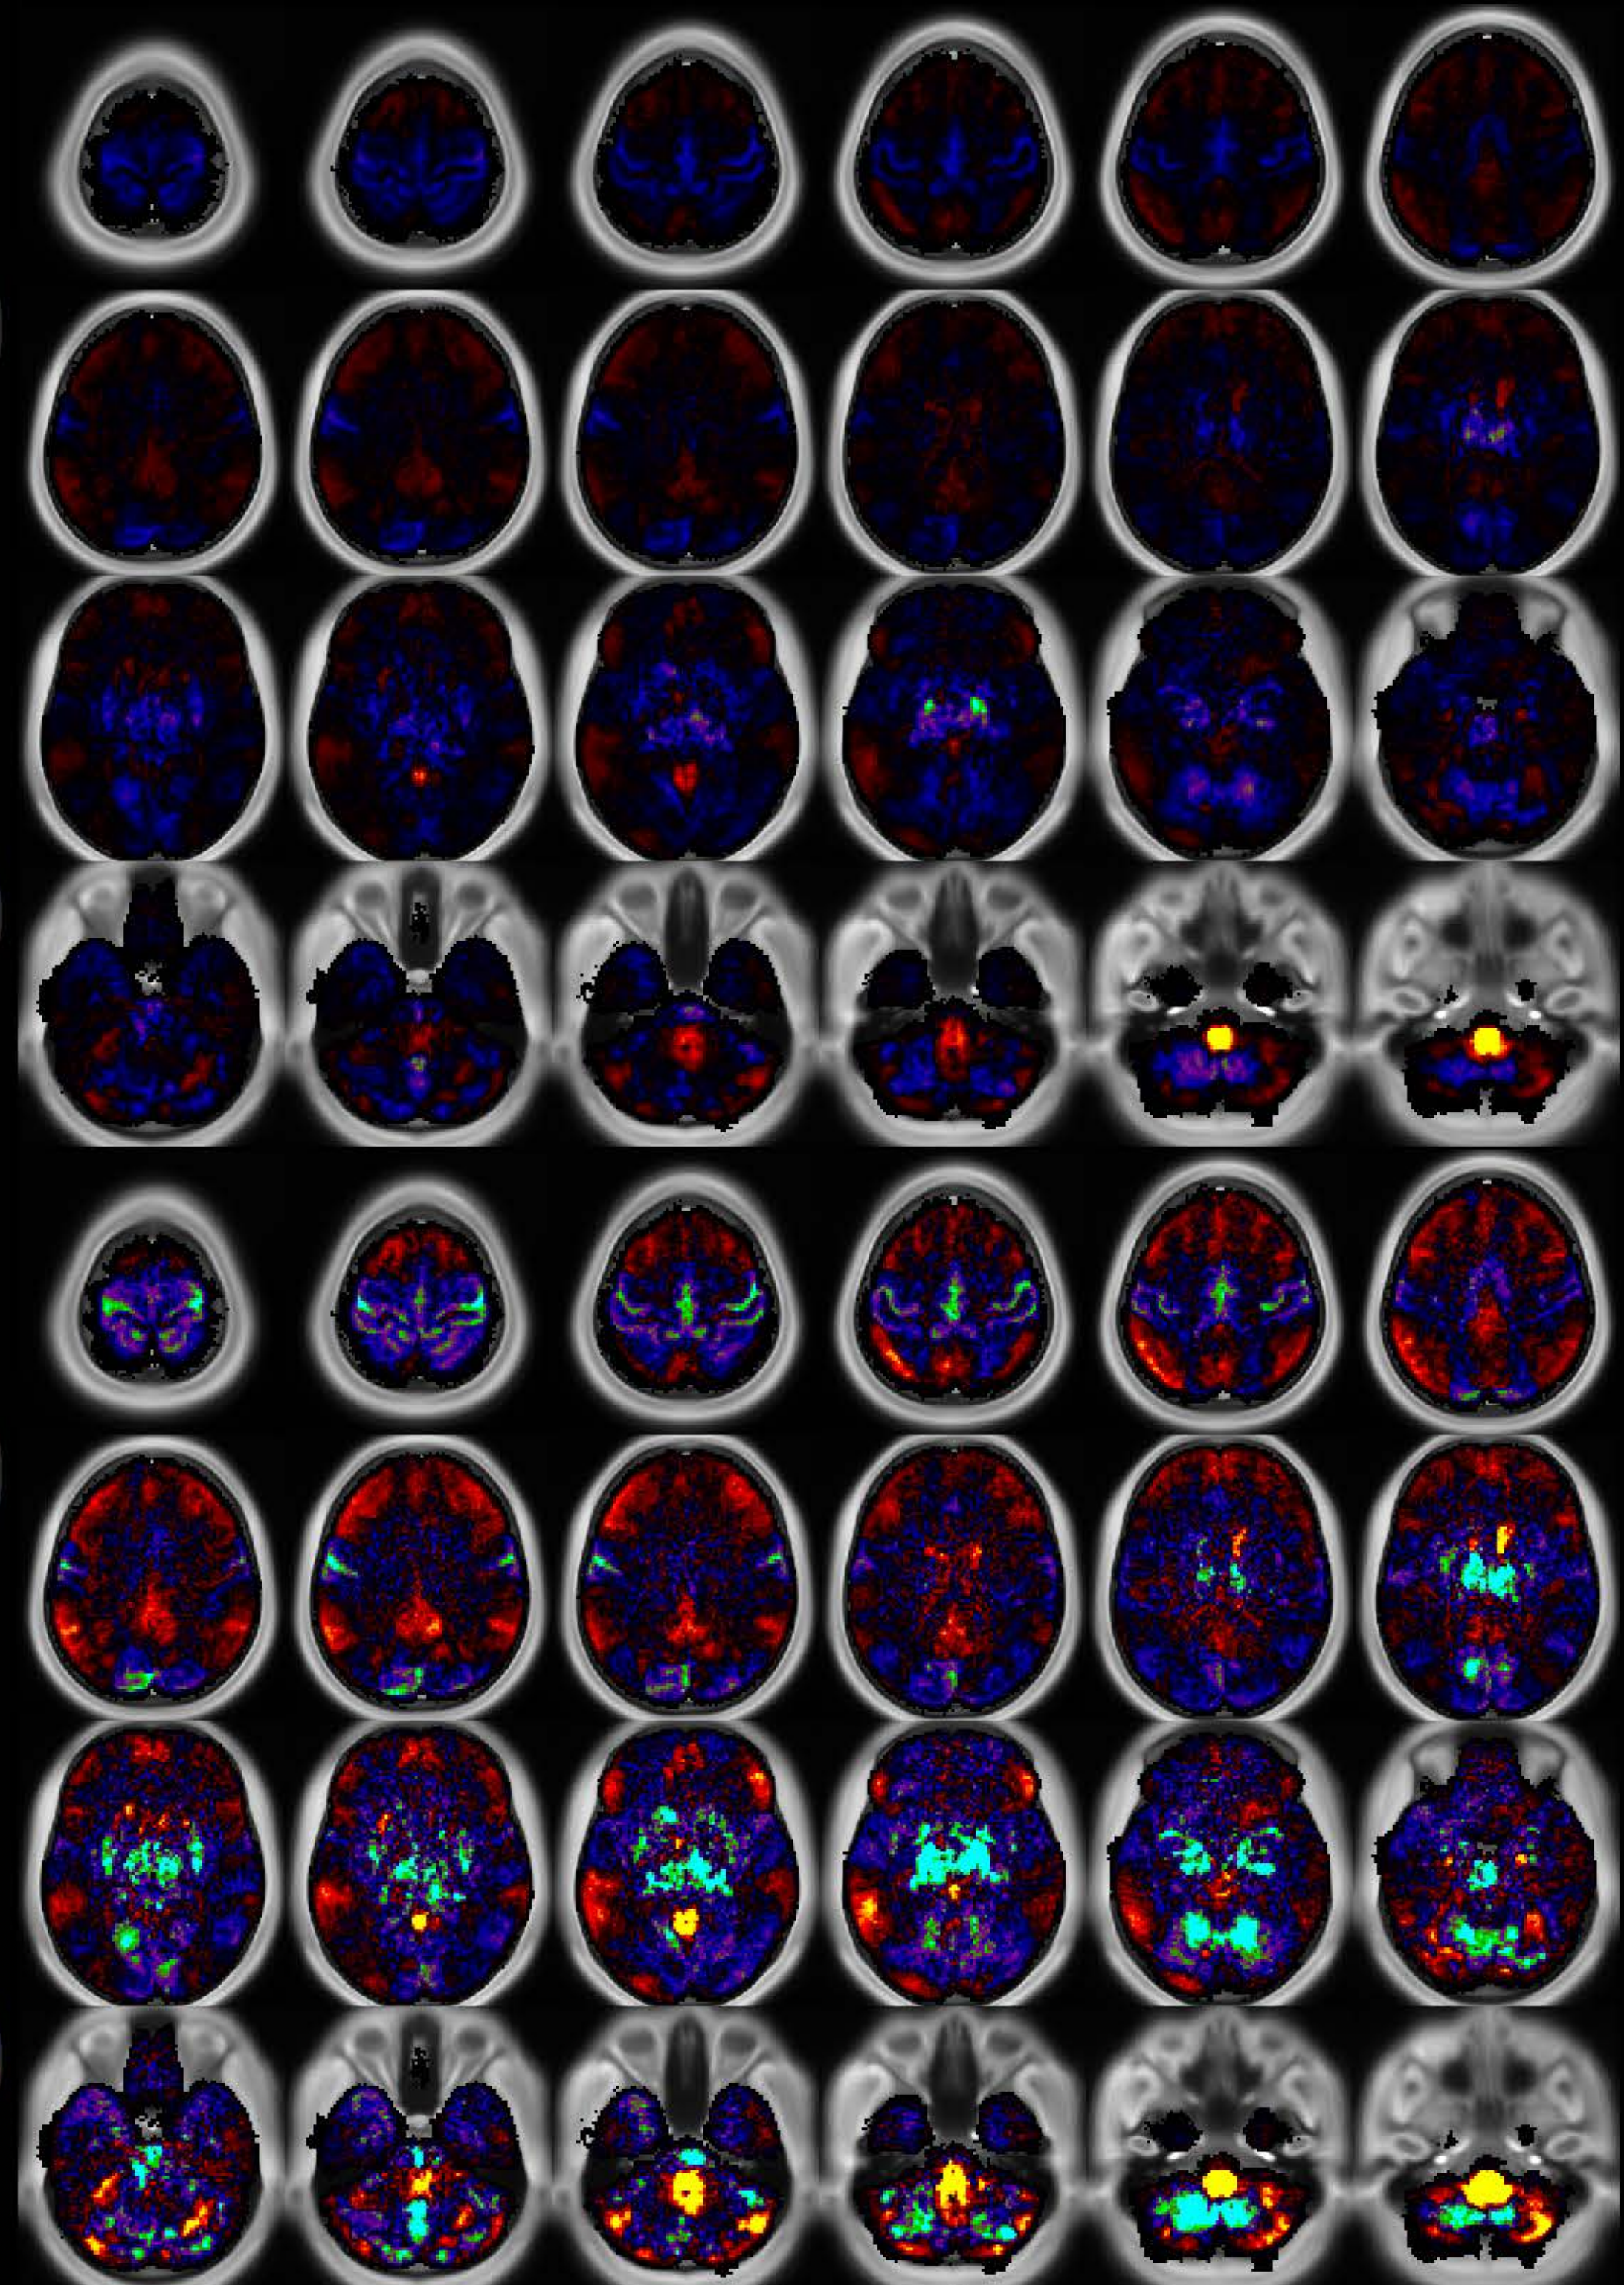

Seconds

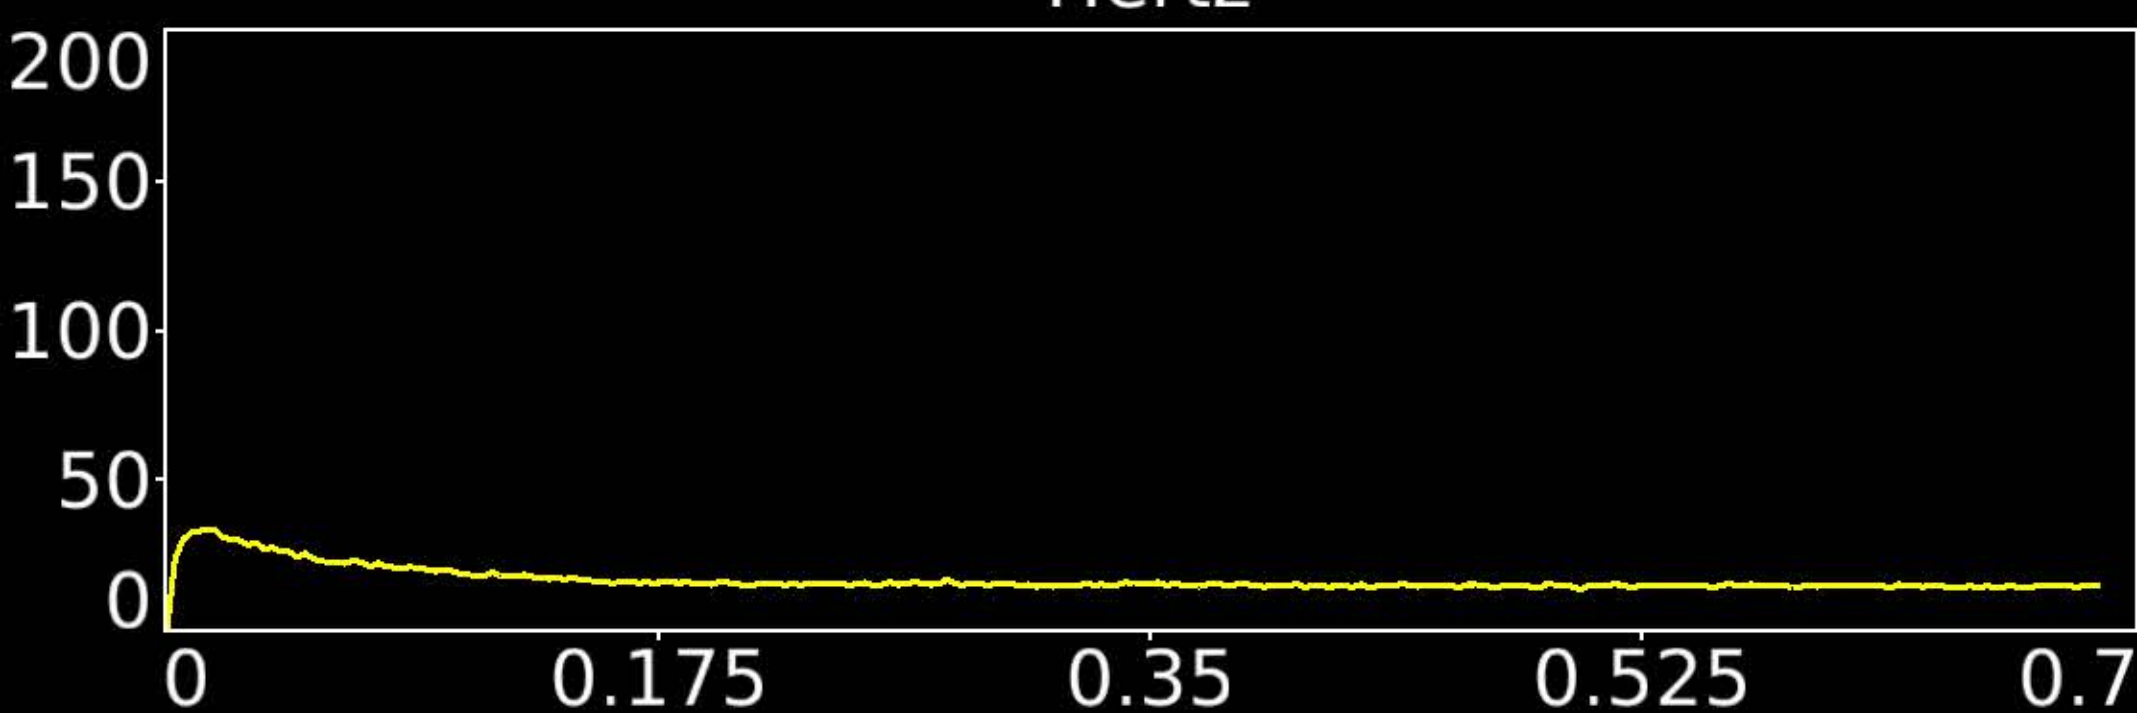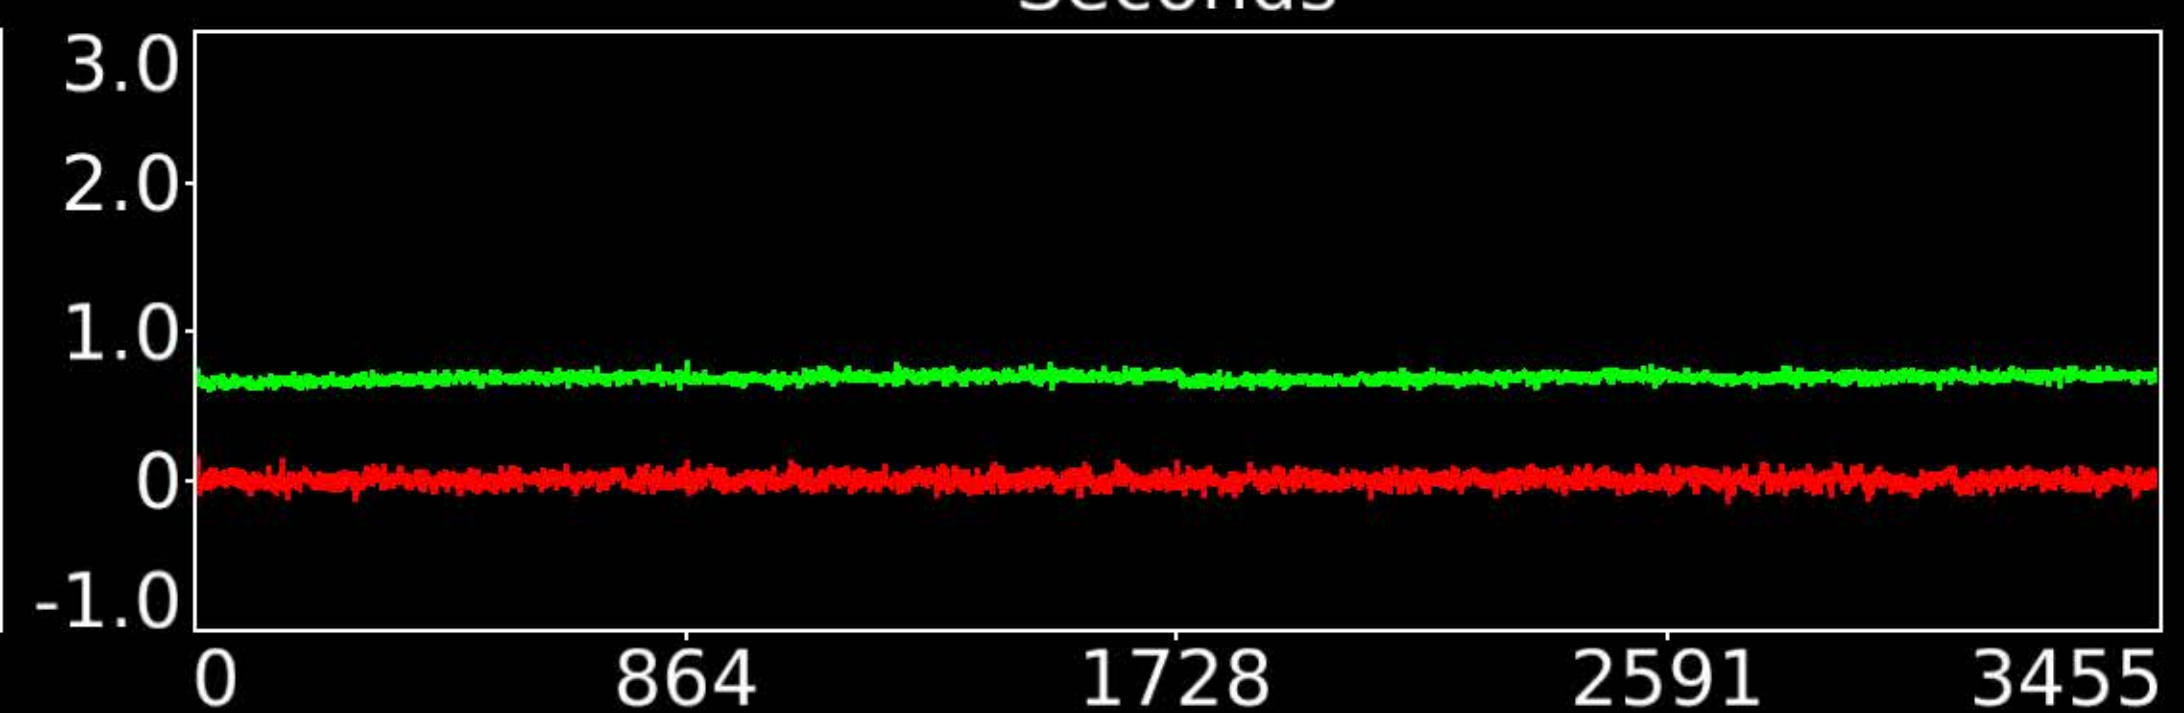

|                          |                            |                              |  |
|--------------------------|----------------------------|------------------------------|--|
| Number & Class: 46 Noise |                            | Name: Medulla Recon Artifact |  |
| RVT Correlated: No       | DVARS Dip Associated: No   | Cross-Subject Variable: No   |  |
| Single Subject: No       | % Variance Explained: 0.72 | Globality Index: 0.58        |  |
| Task Component: 43       | Taskr Component: 38        | Sleep Noted: No              |  |

Rationale: Spatial map not reflective of known areas or RSNs without connectivity other brain structures; some banding in sagittal plane suggestive of multi-band recon



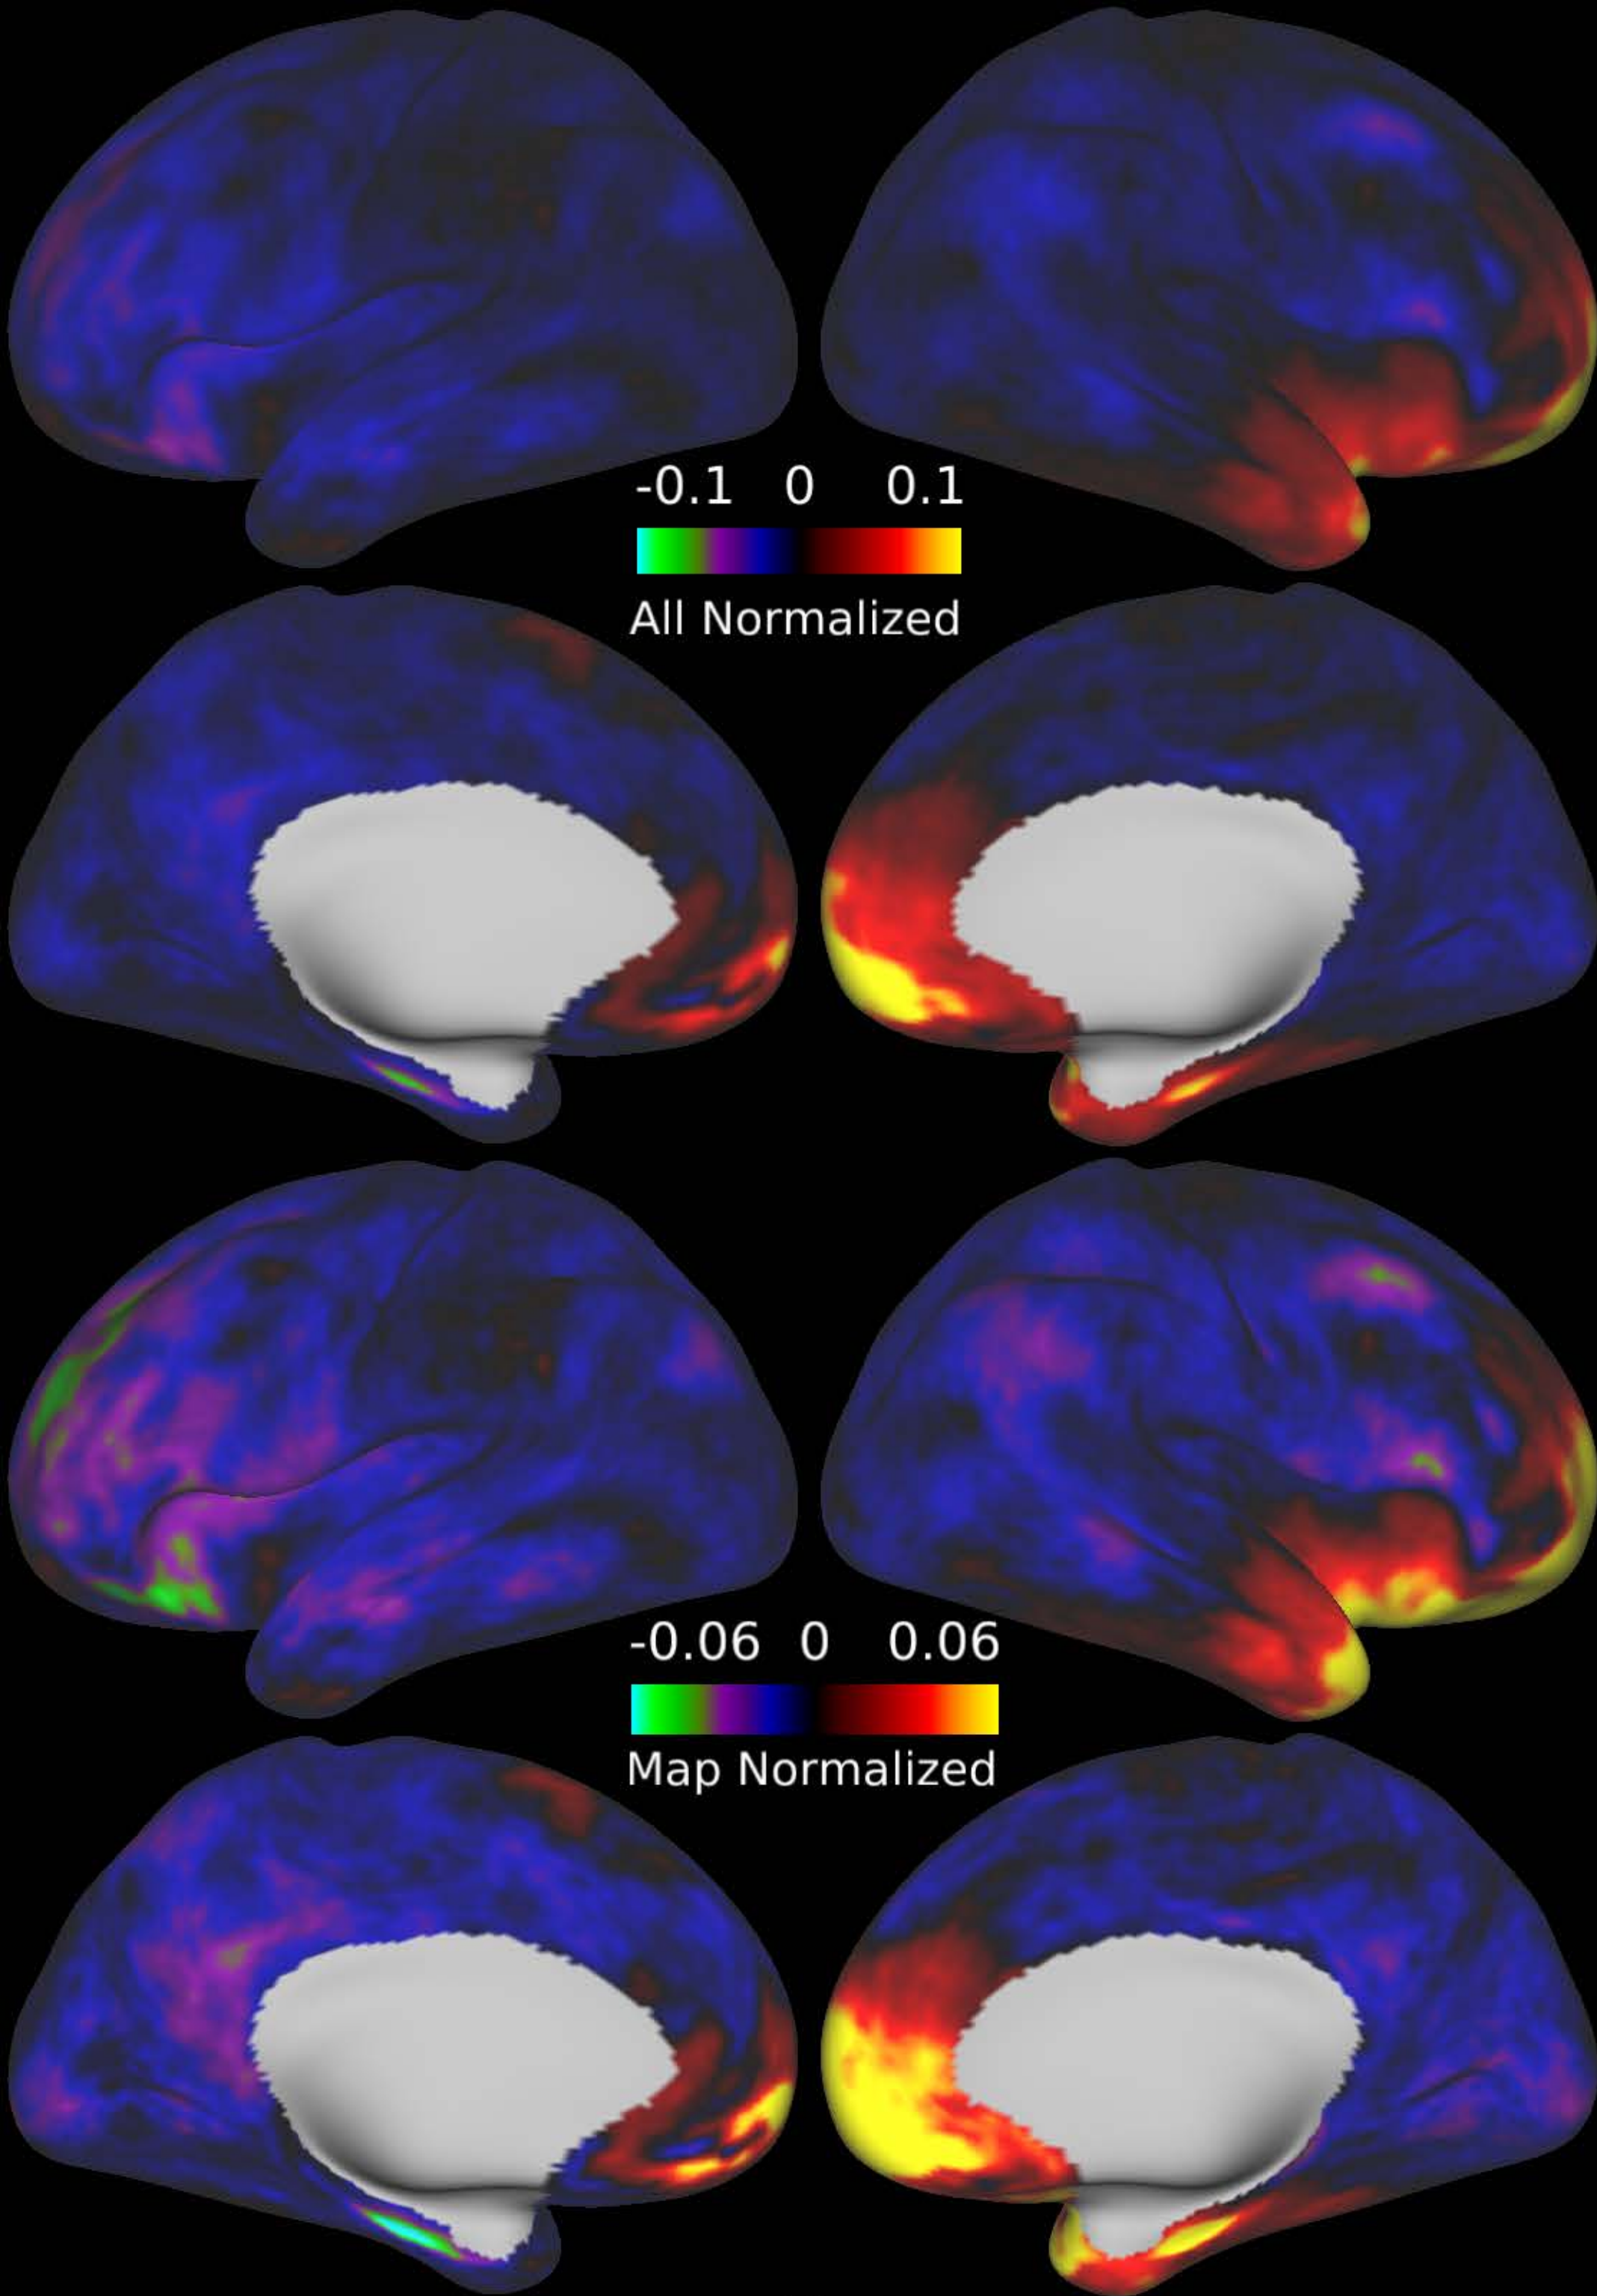

Hertz

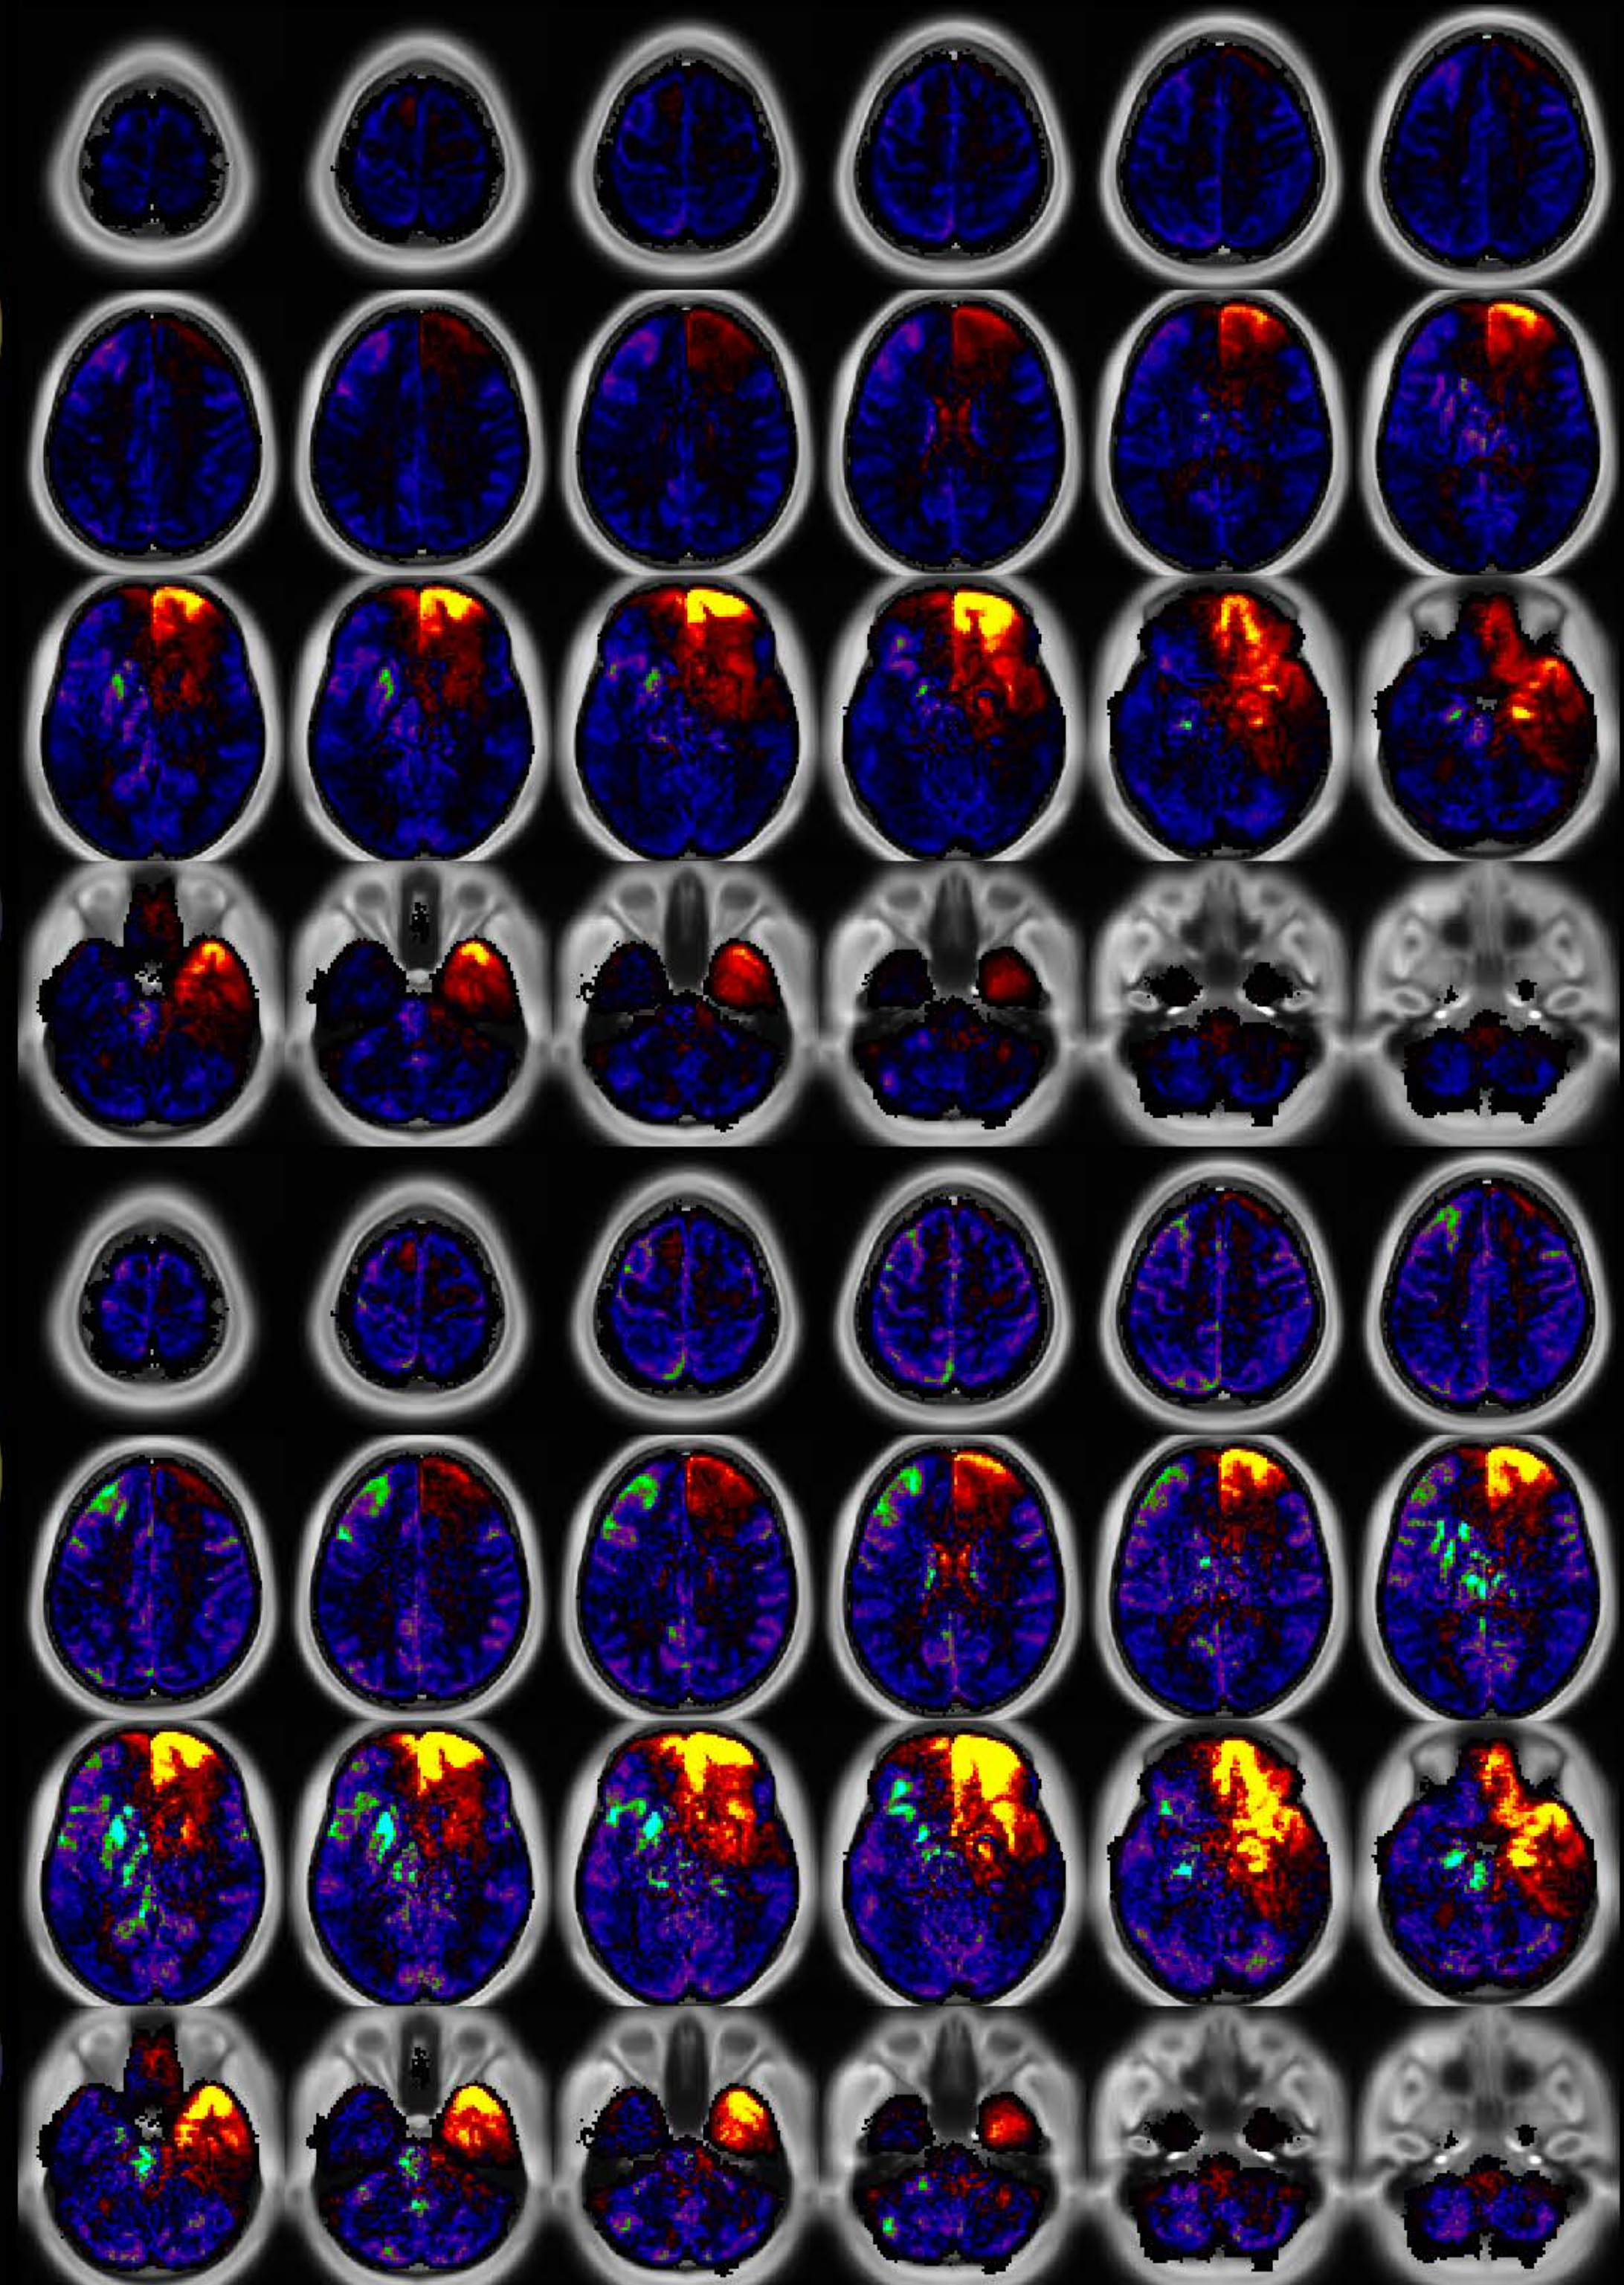

Seconds

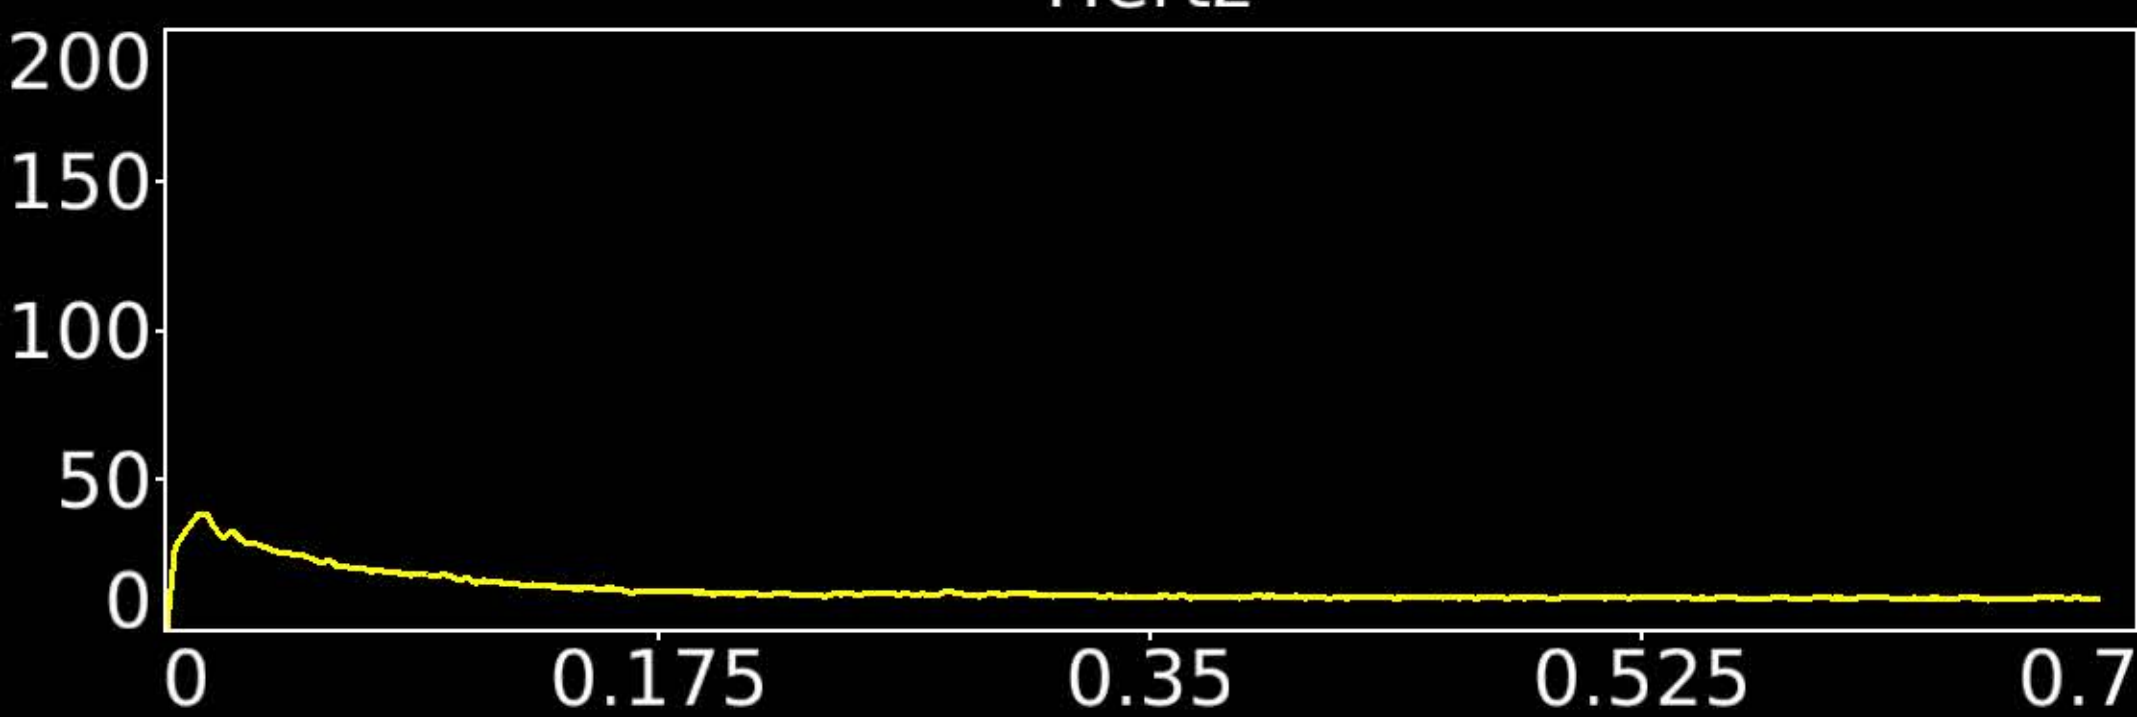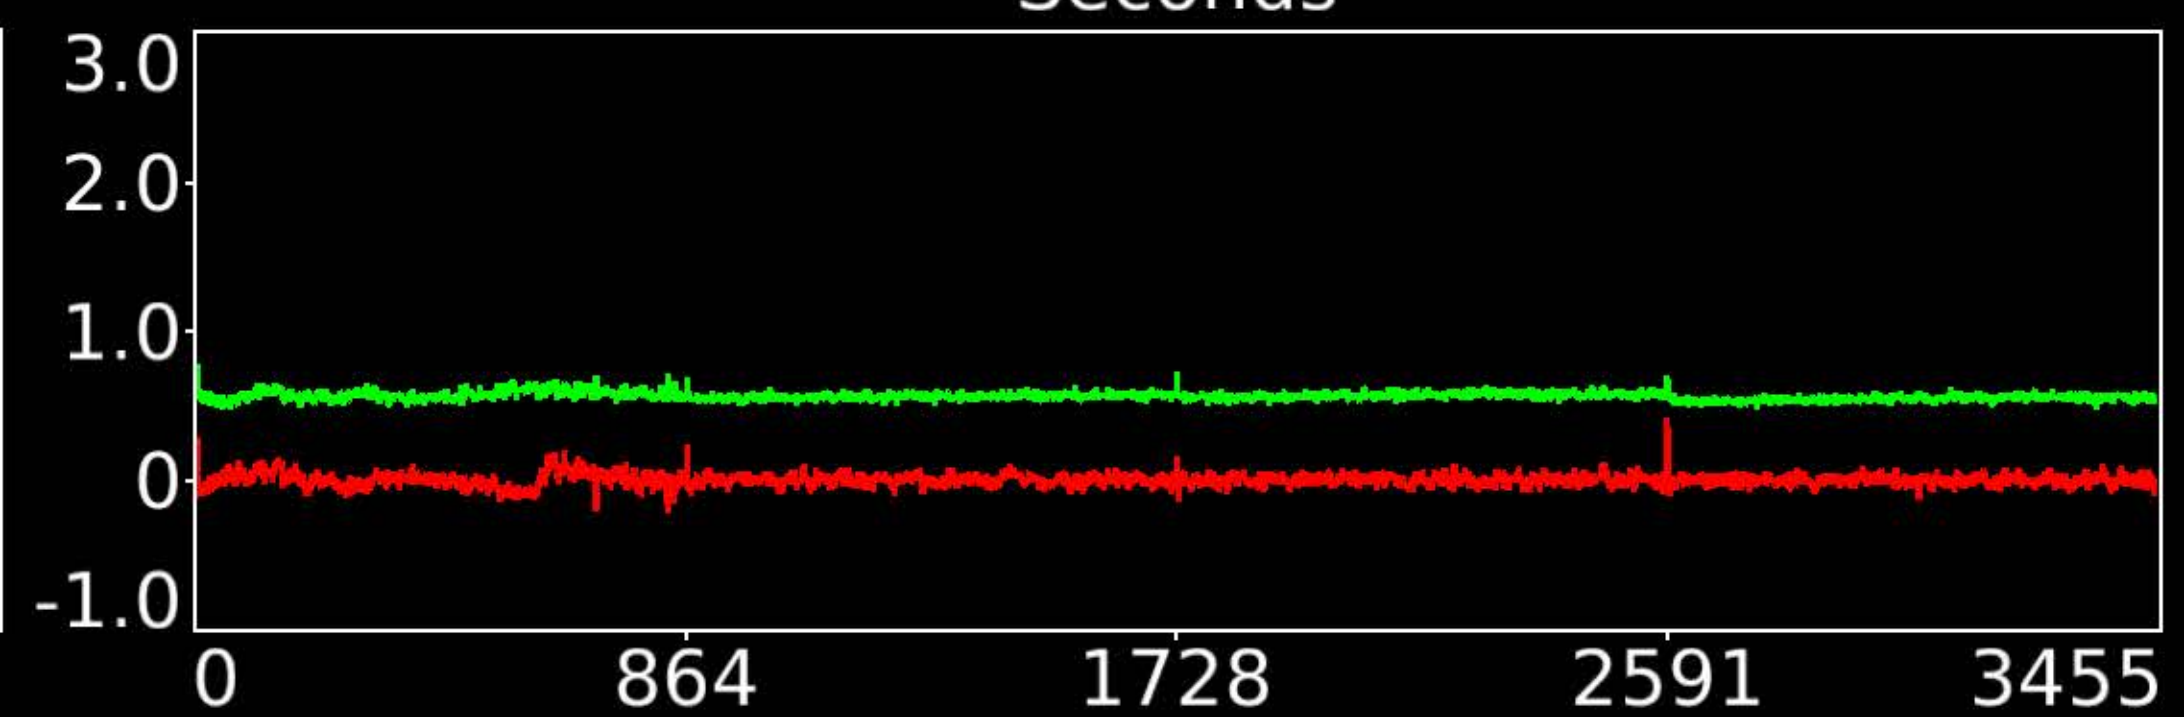

|                                                                  |                           |                             |  |
|------------------------------------------------------------------|---------------------------|-----------------------------|--|
| Number & Class: 47 Noise                                         |                           | Name: Coil                  |  |
| RVT Correlated: No                                               | DVARS Dip Associated: Yes | Cross-Subject Variable: Yes |  |
| Single Subject: Yes                                              | % Variance Explained: 0.7 | Globality Index: 2.16       |  |
| Task Component: 50                                               | Taskr Component: 50       | Sleep Noted: Yes            |  |
| Rationale: Known single run artifact due to coil element failure |                           |                             |  |



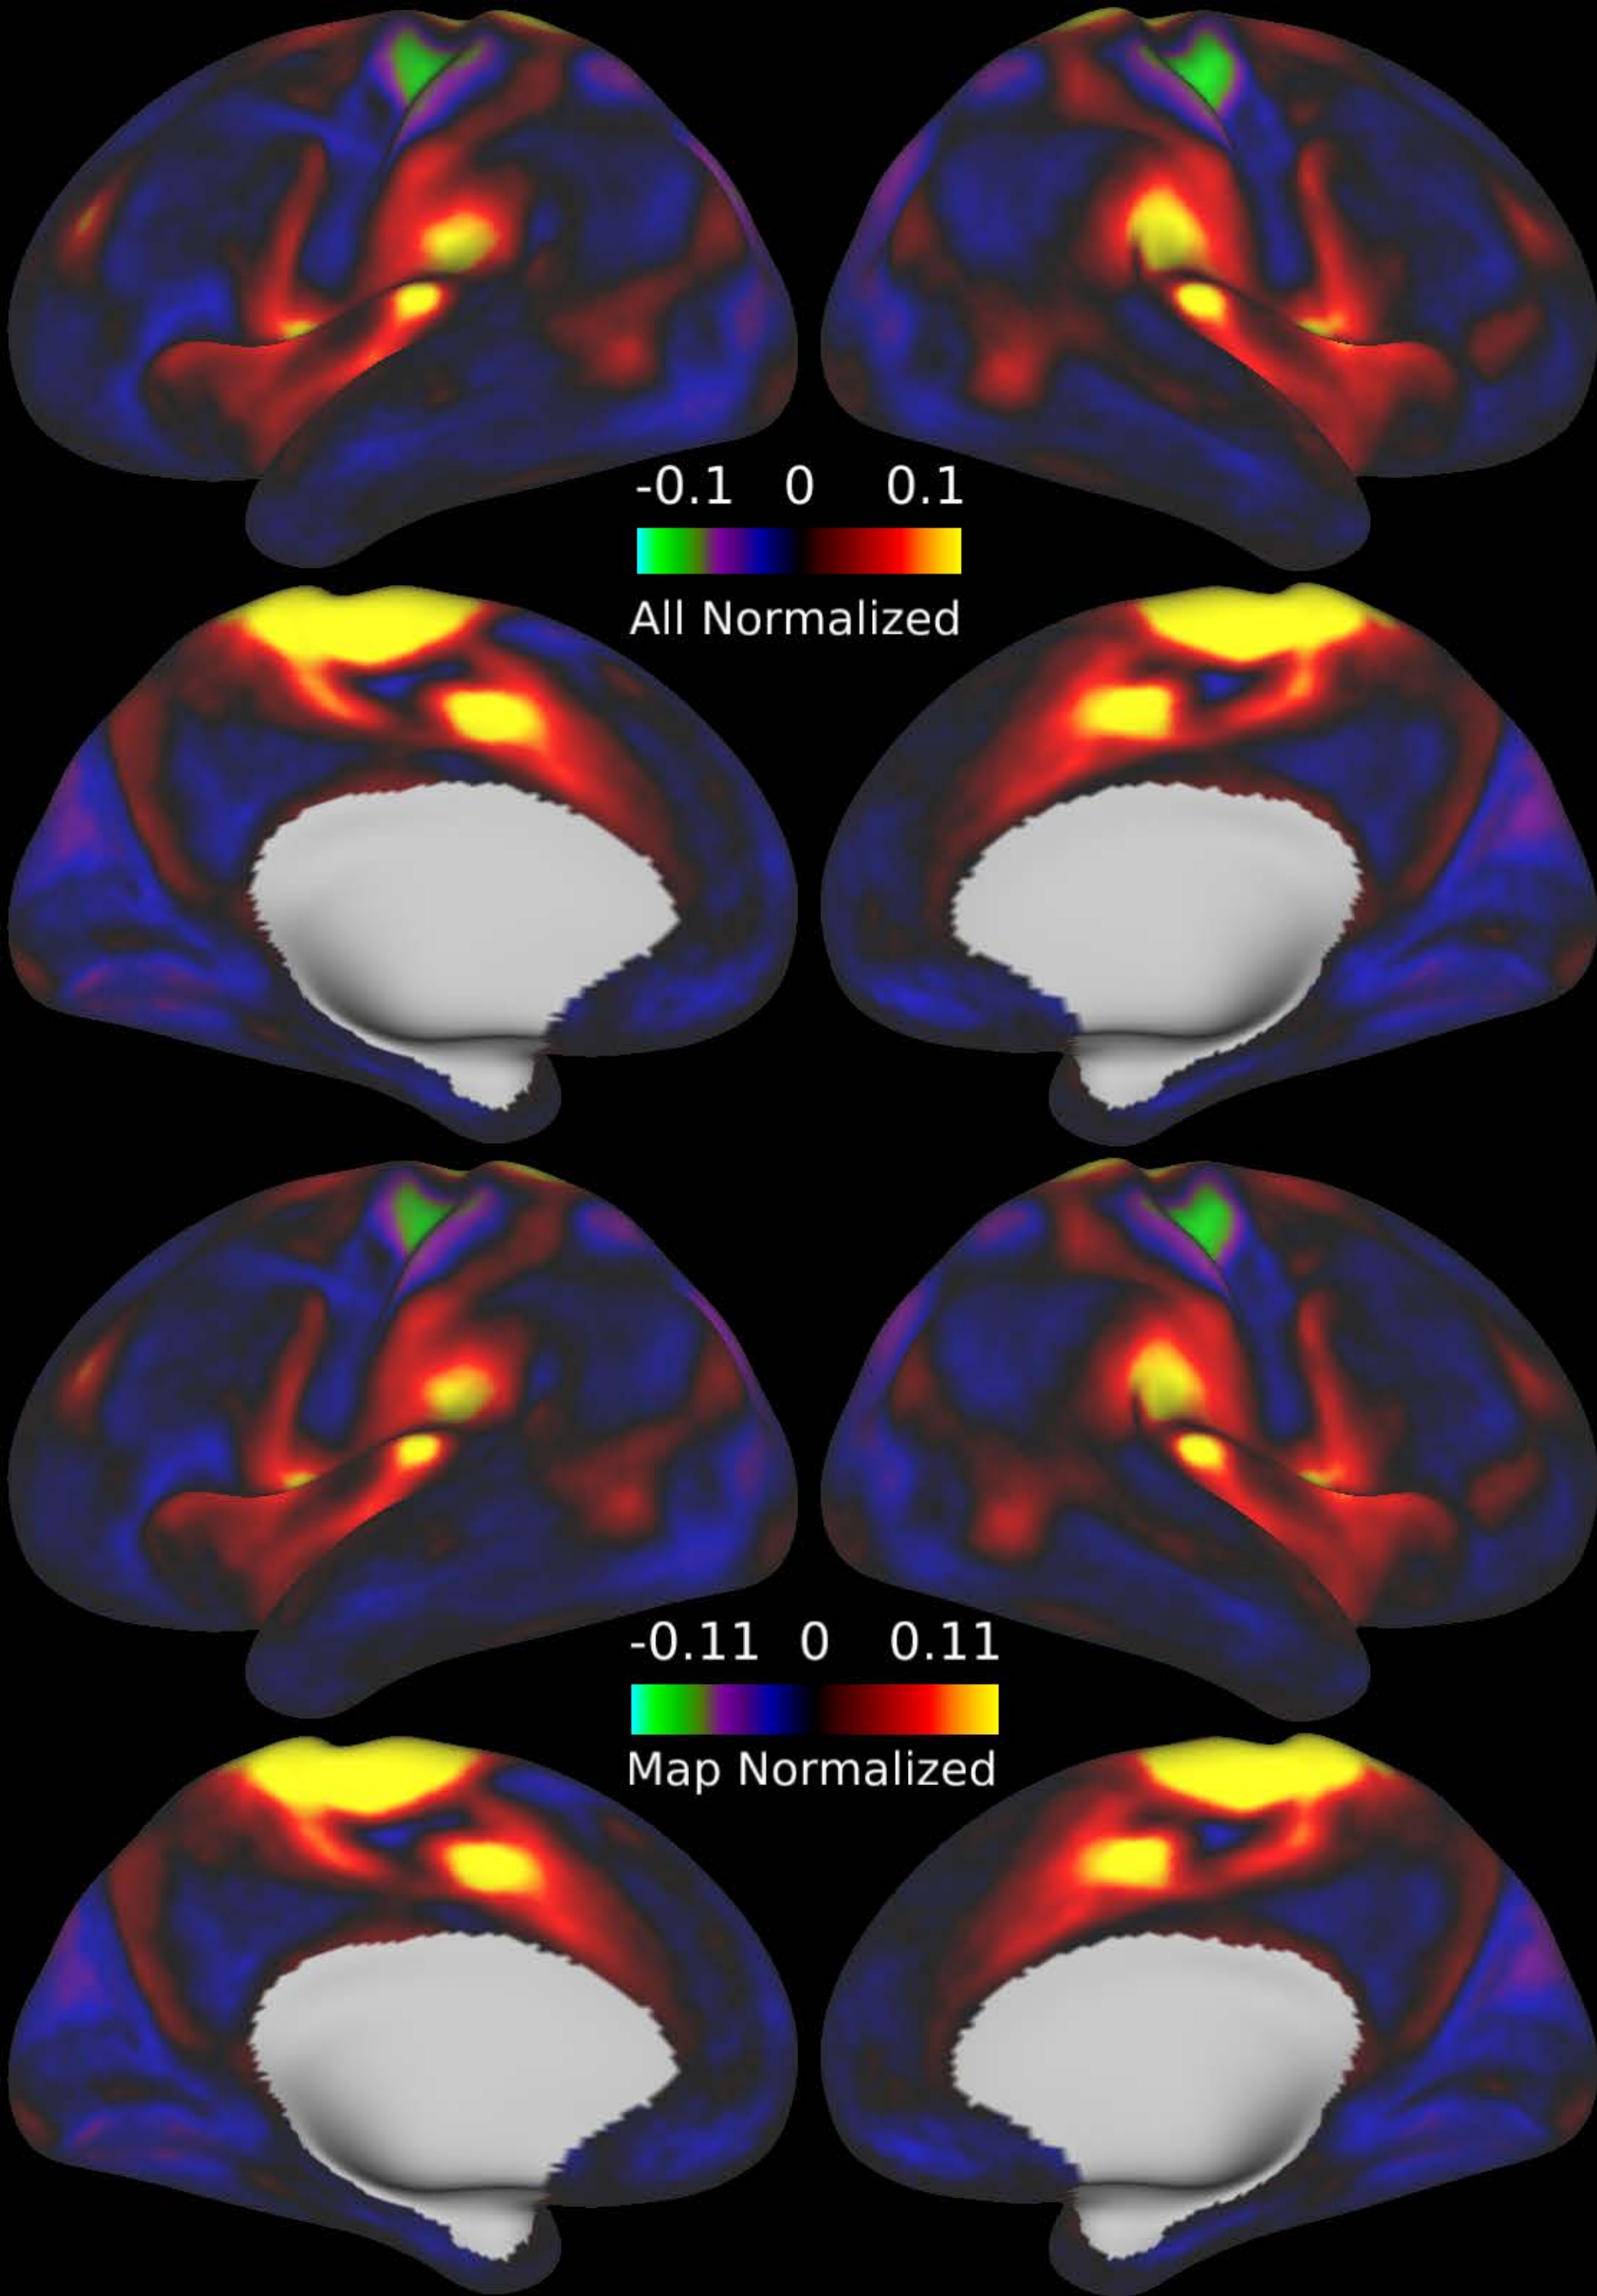

Hertz

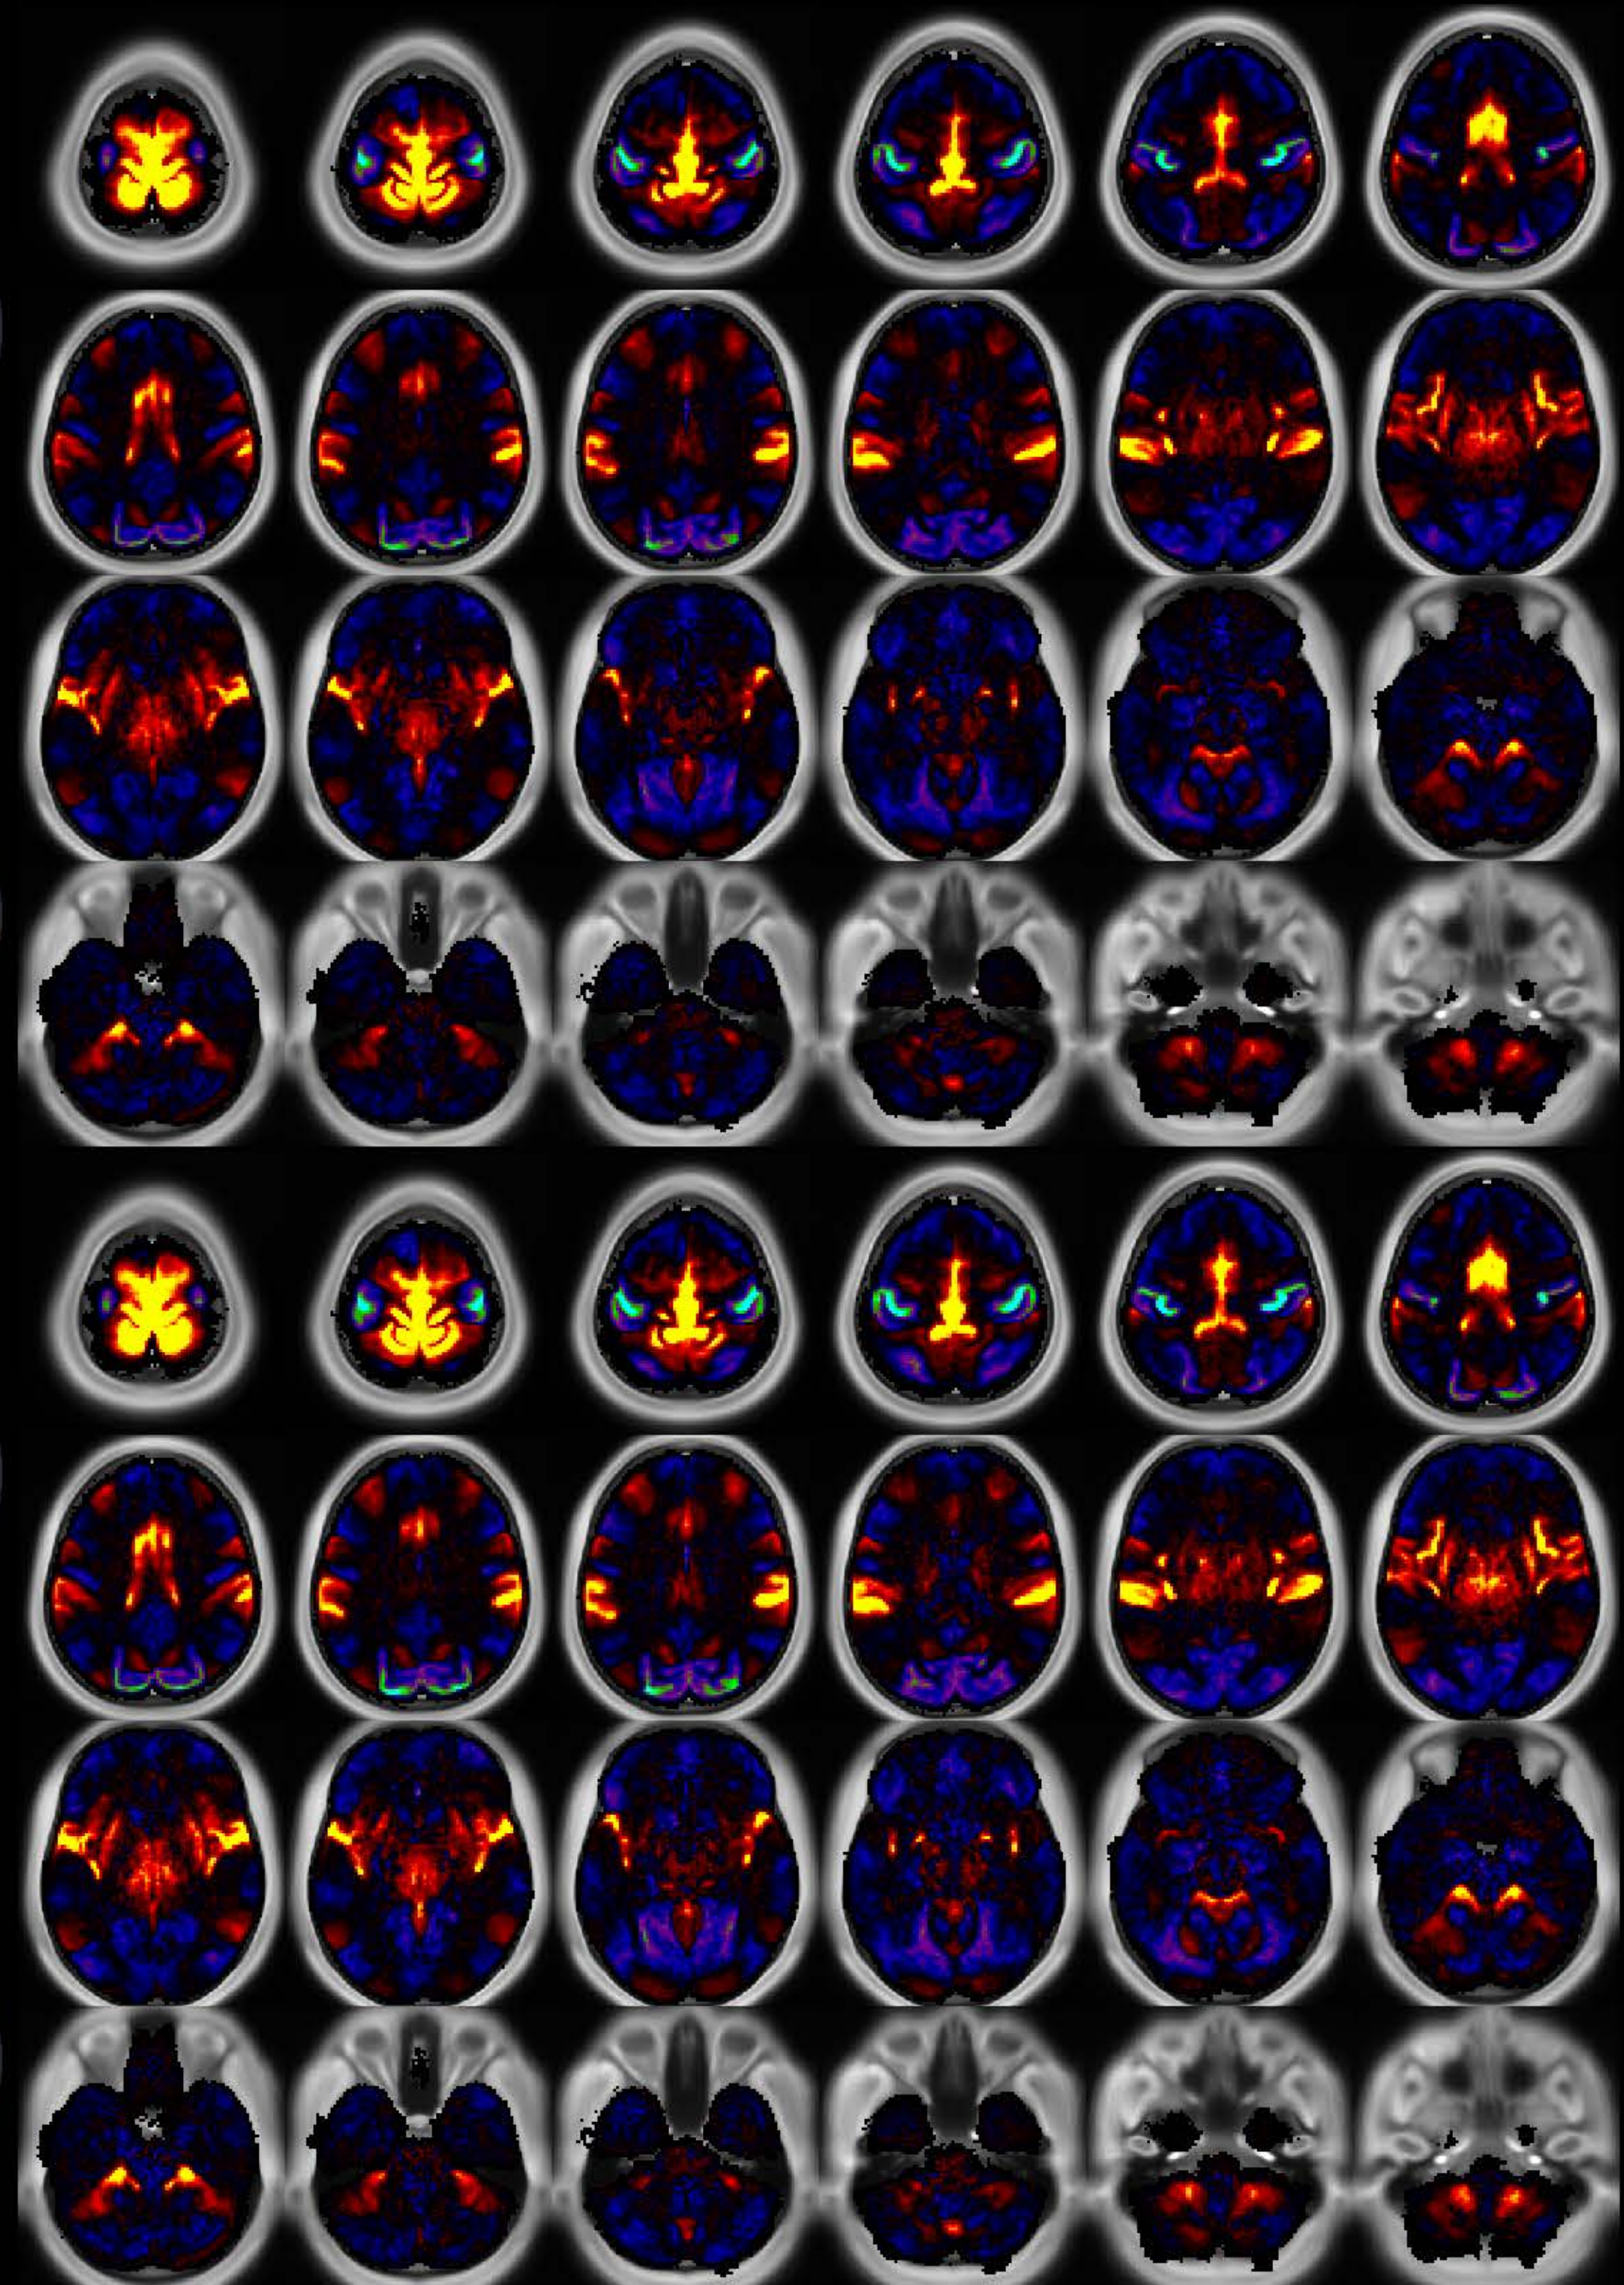

Seconds

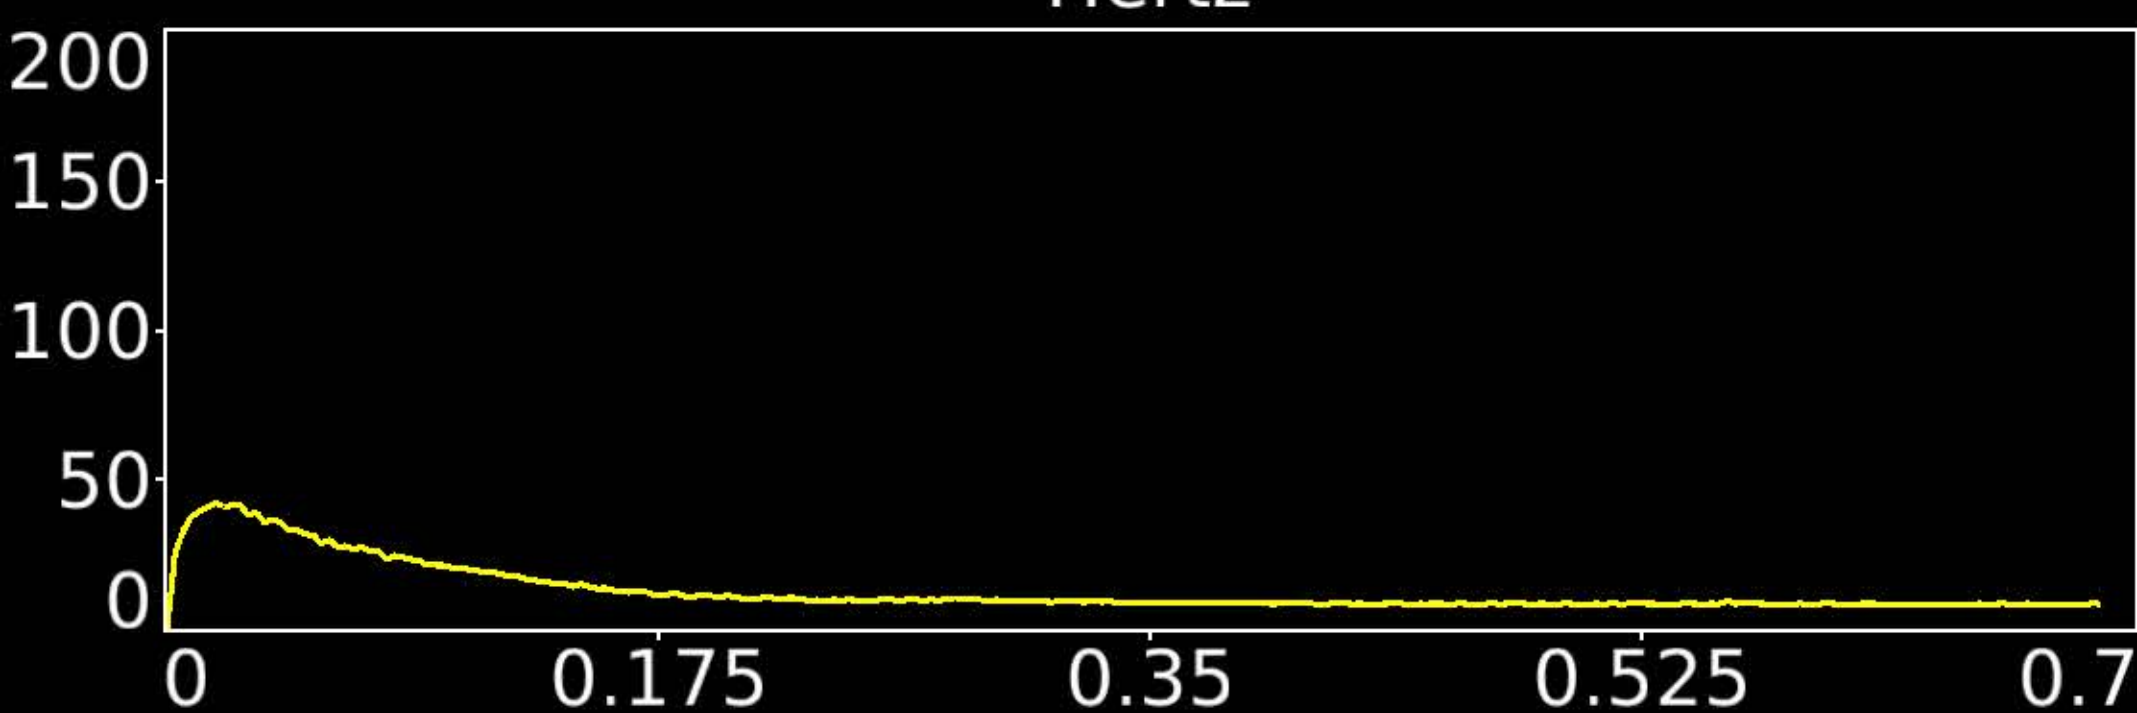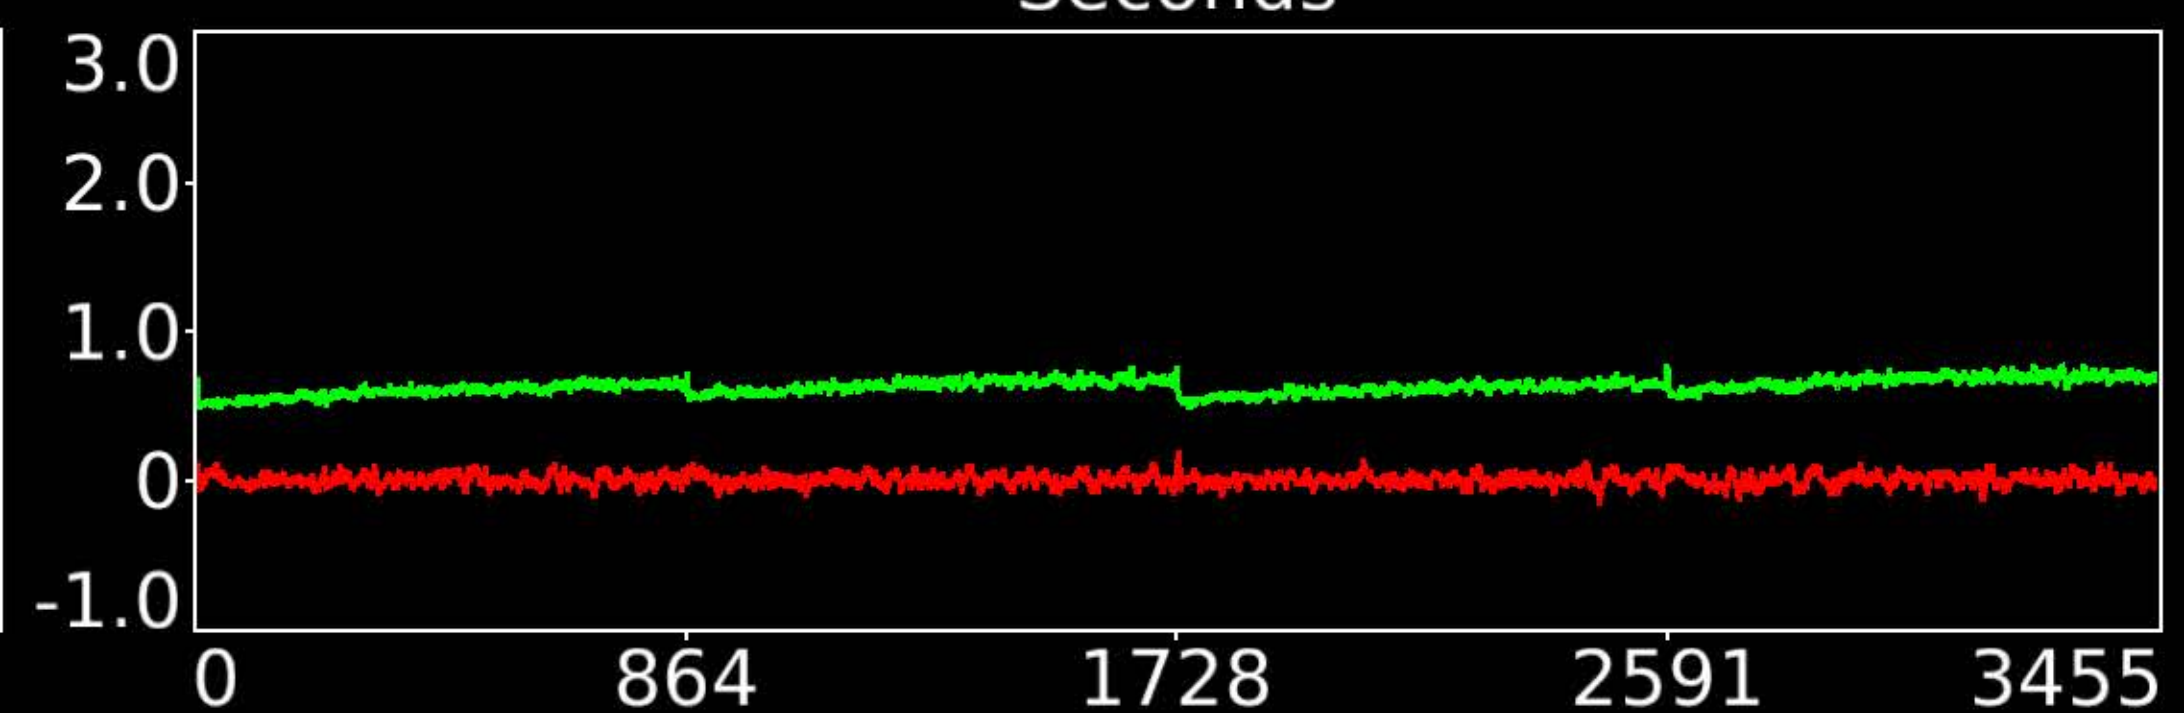

|                           |                            |                             |  |
|---------------------------|----------------------------|-----------------------------|--|
| Number & Class: 48 Signal |                            | Name: Feet Motor Network    |  |
| RVT Correlated: No        | DVARS Dip Associated: Yes  | Cross-Subject Variable: Yes |  |
| Single Subject: No        | % Variance Explained: 0.67 | Globality Index: 0.21       |  |
| Task Component: 19        | Taskr Component: 24        | Sleep Noted: No             |  |

Rationale: Spatial map includes positive and negative patches that respect known somatotopic sensori-motor organization (Feet)



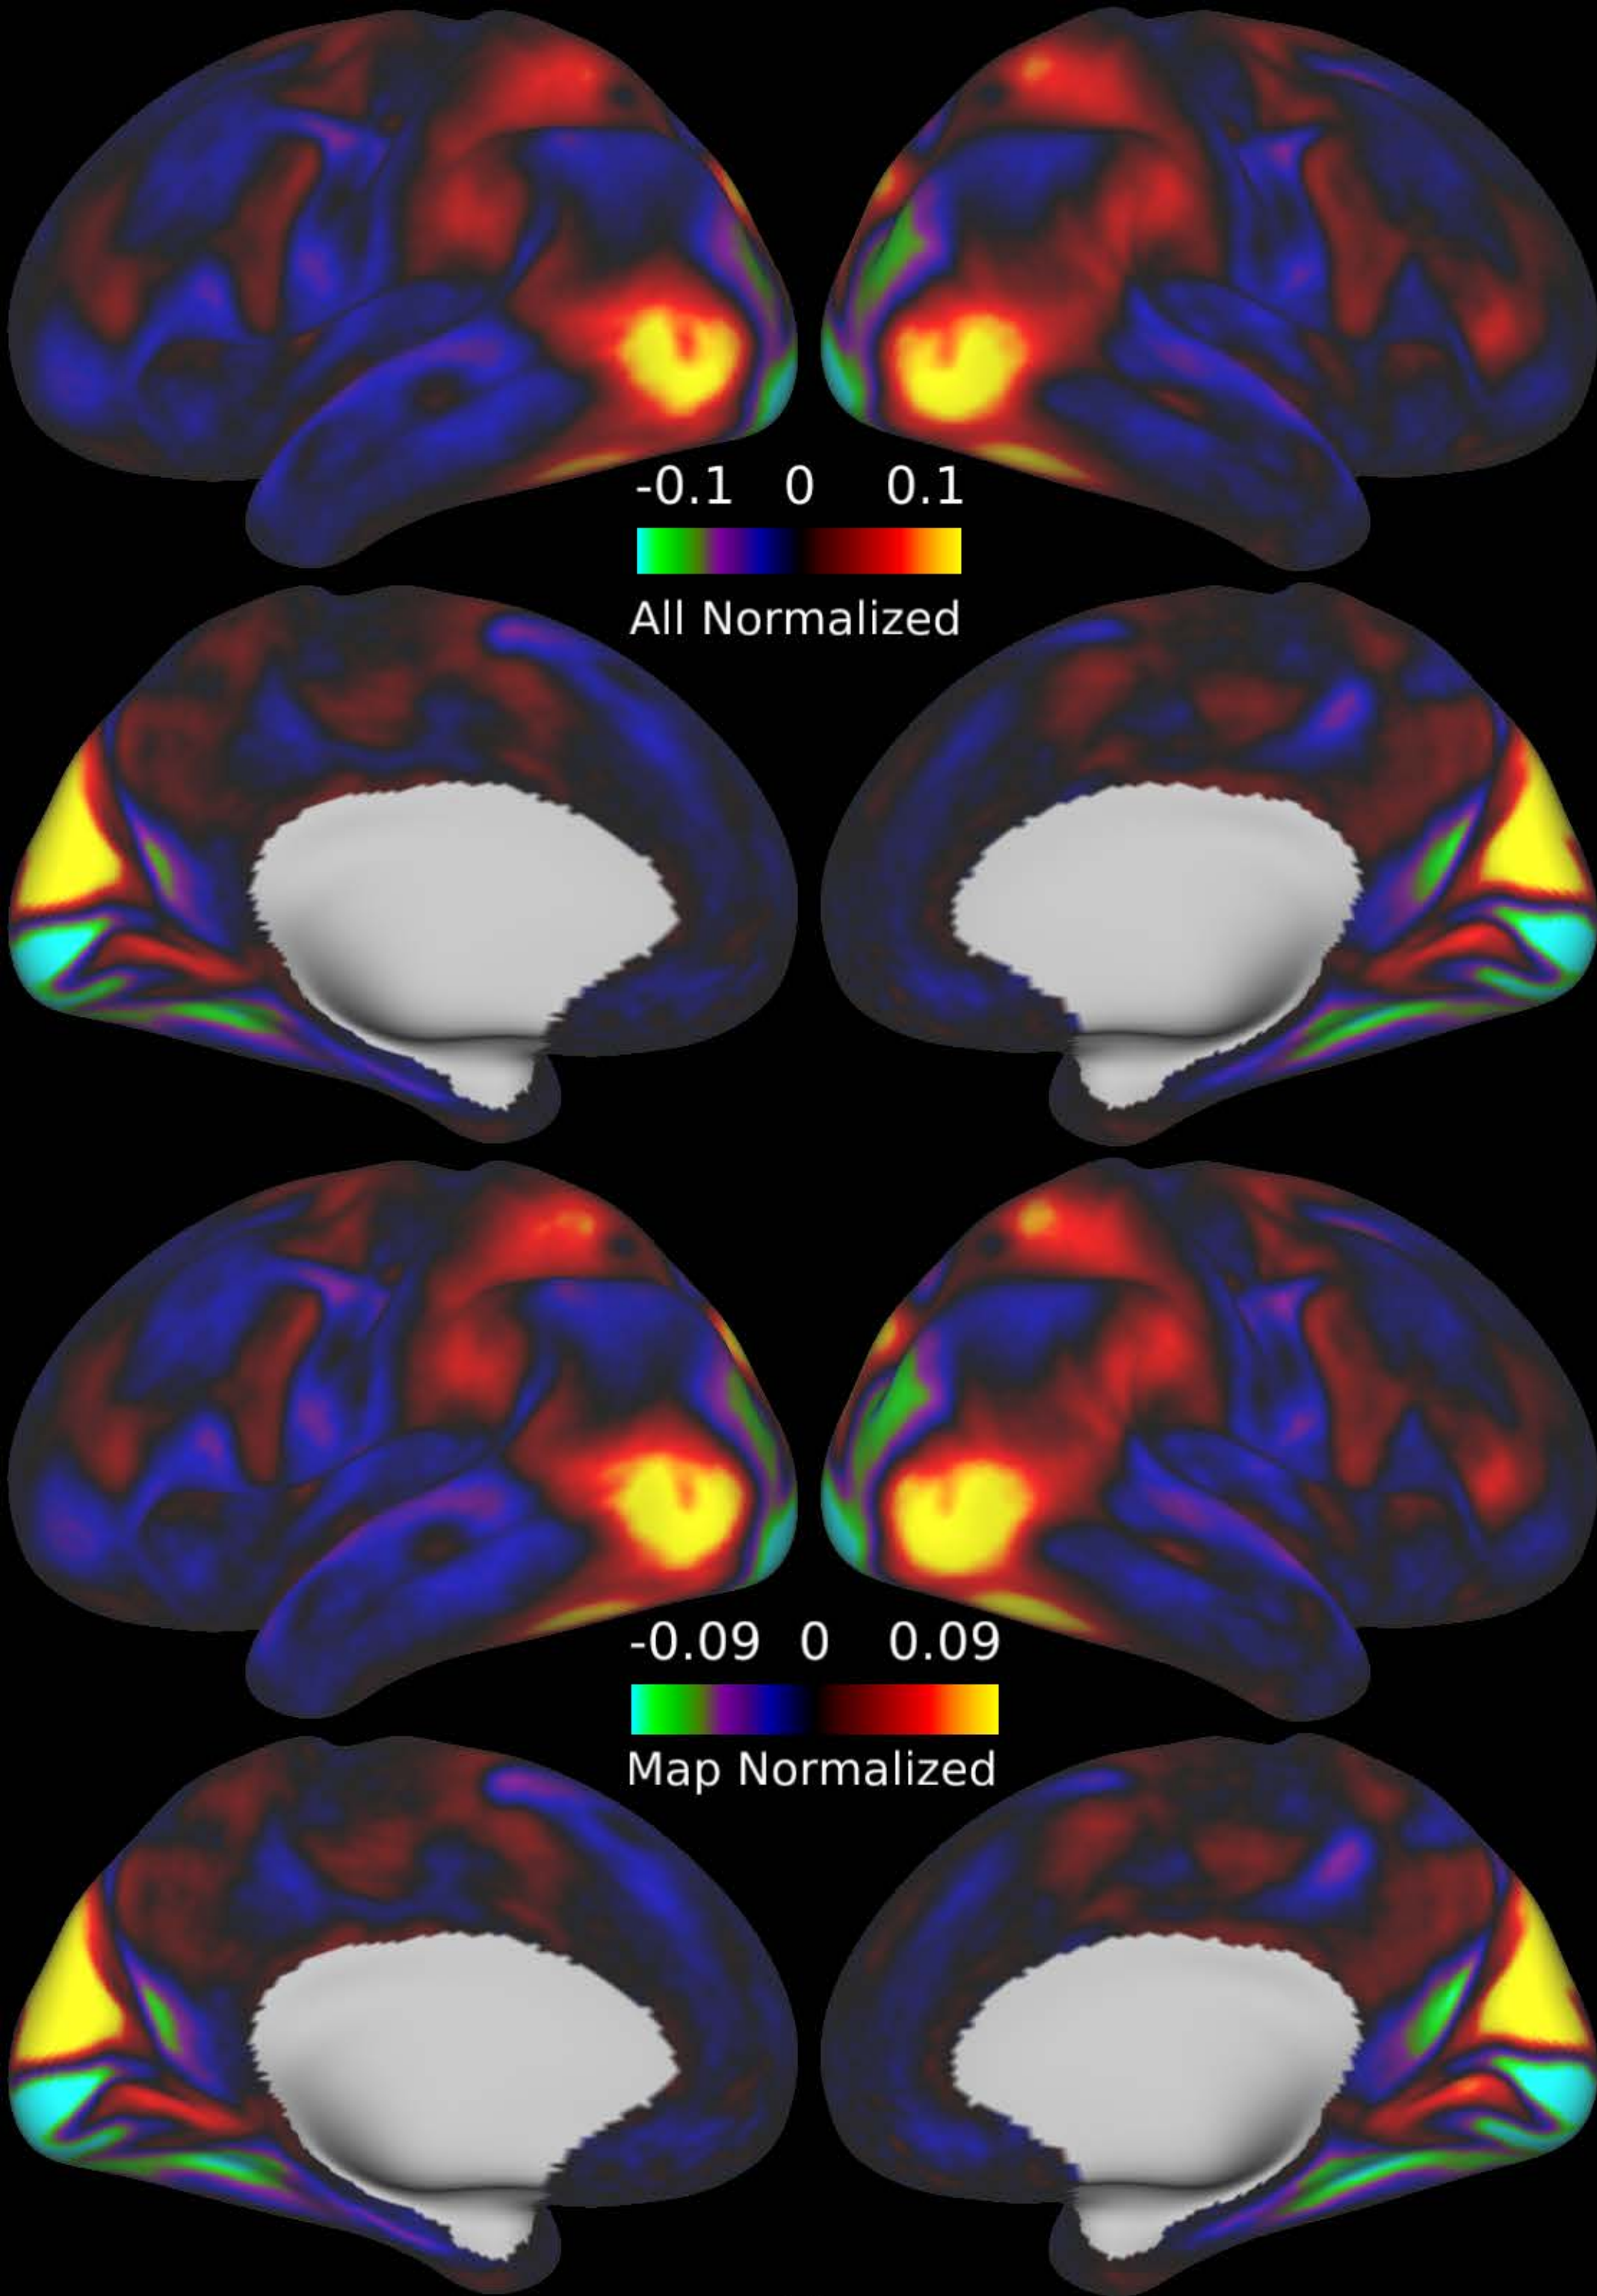

Hertz

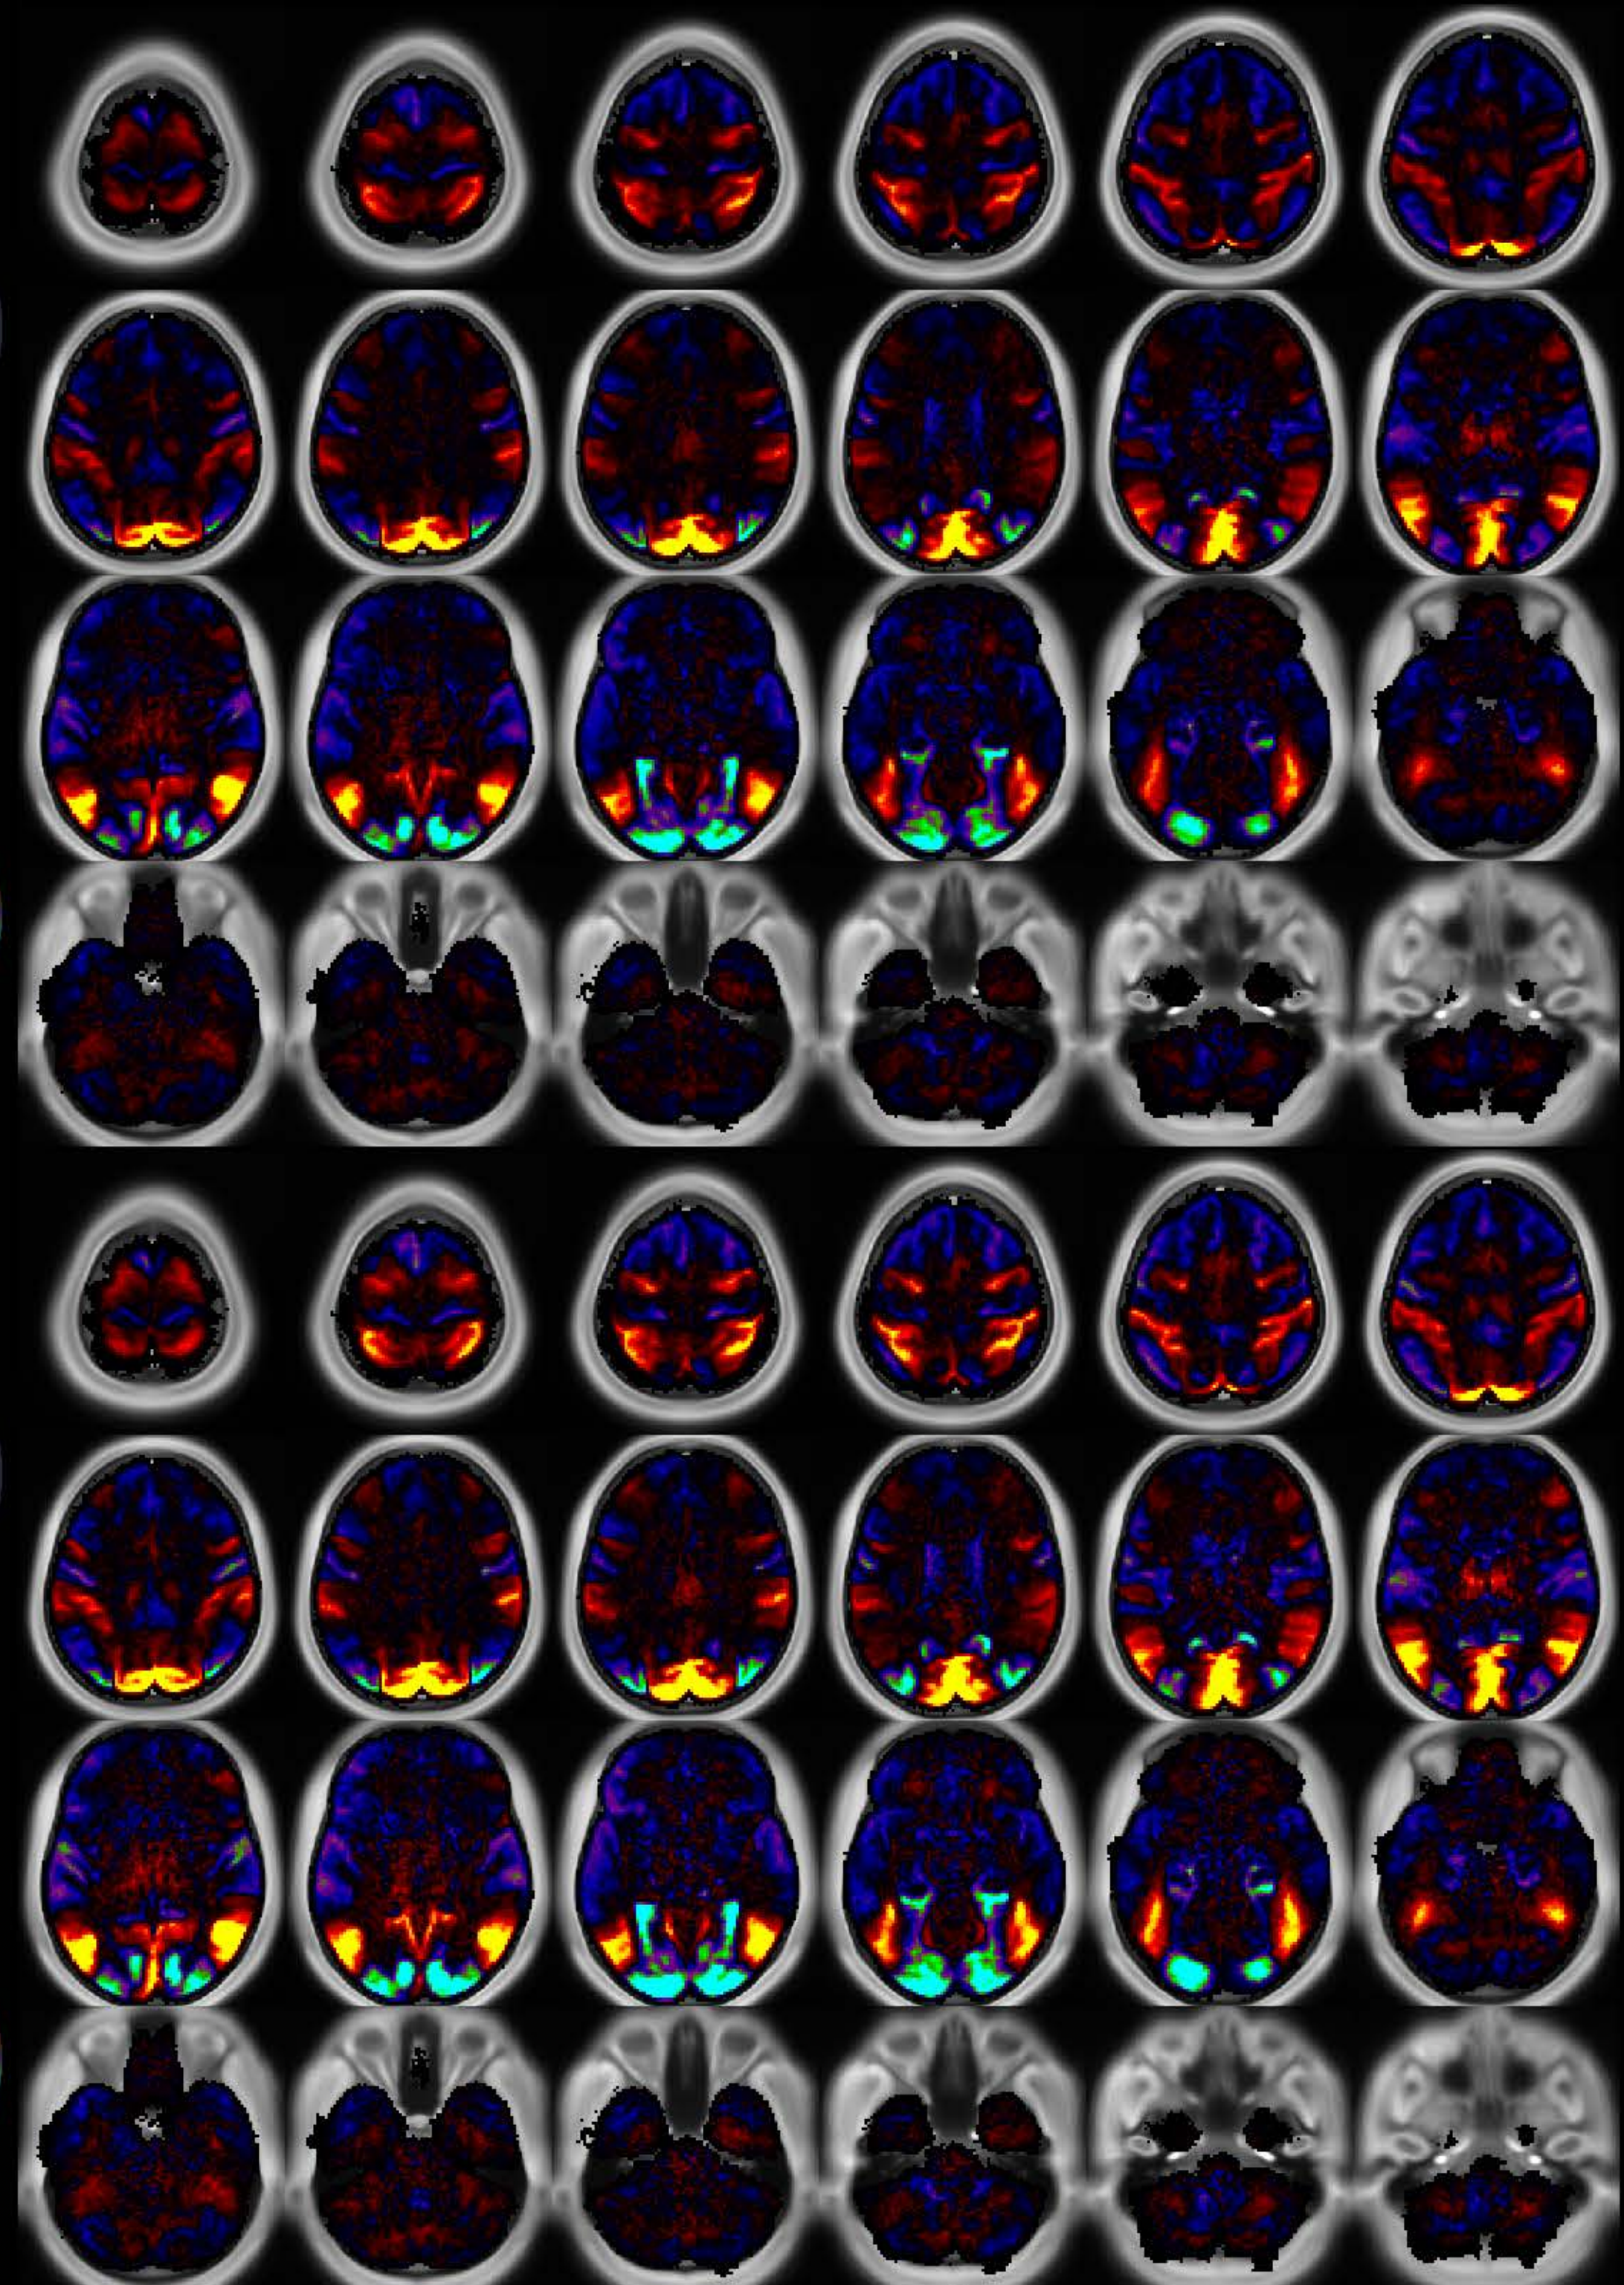

Seconds

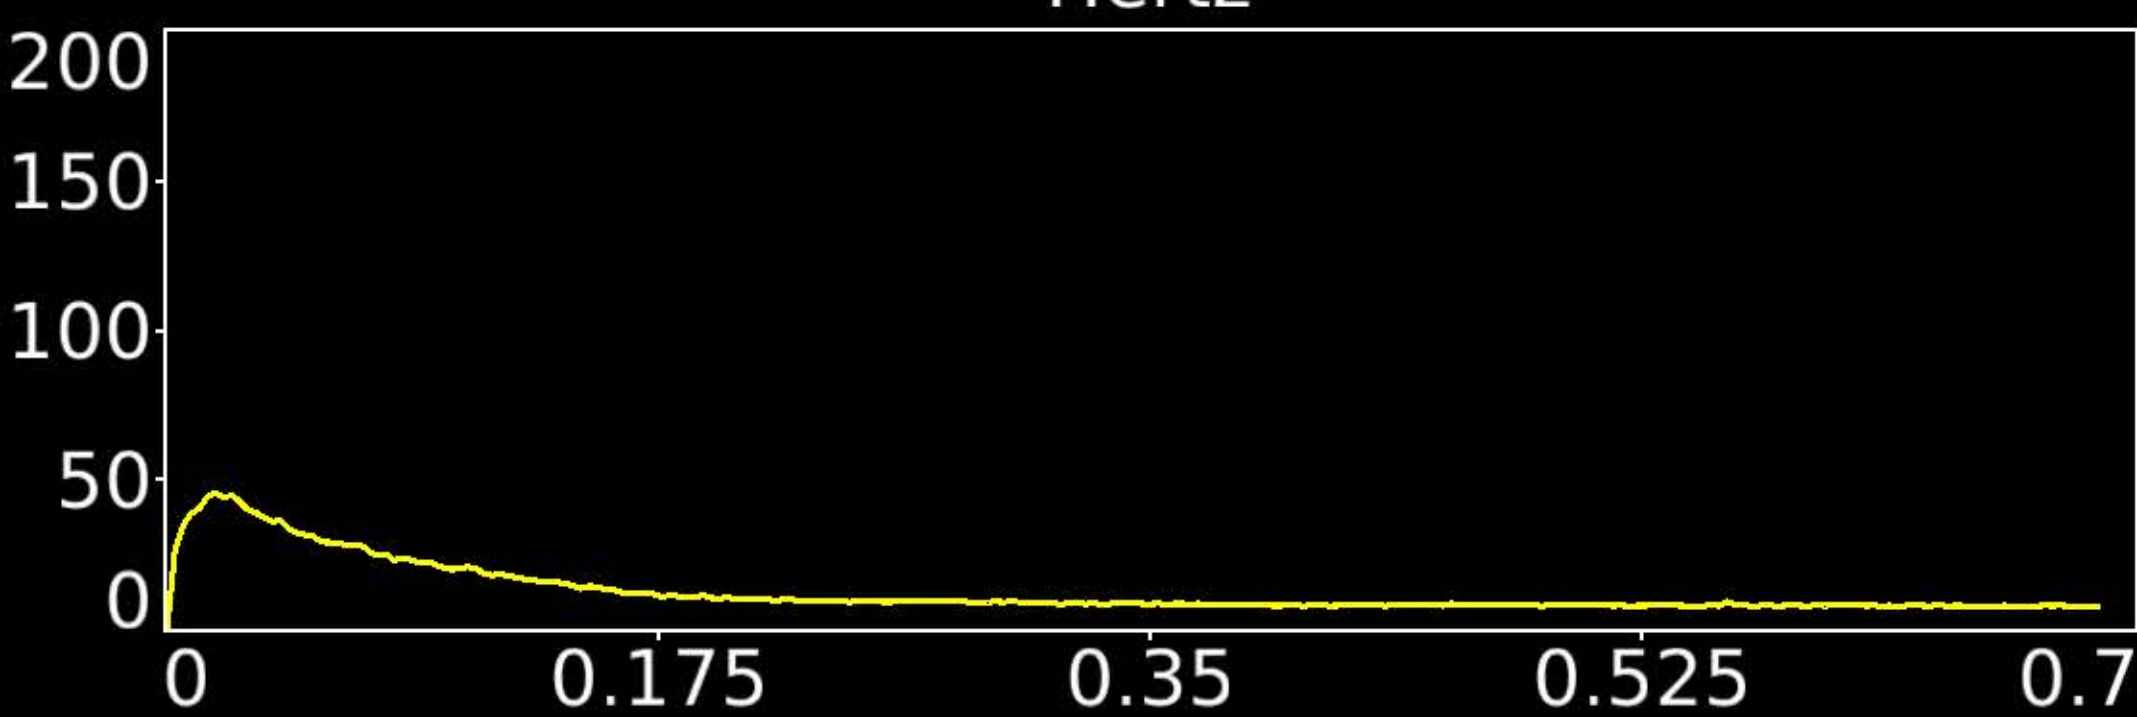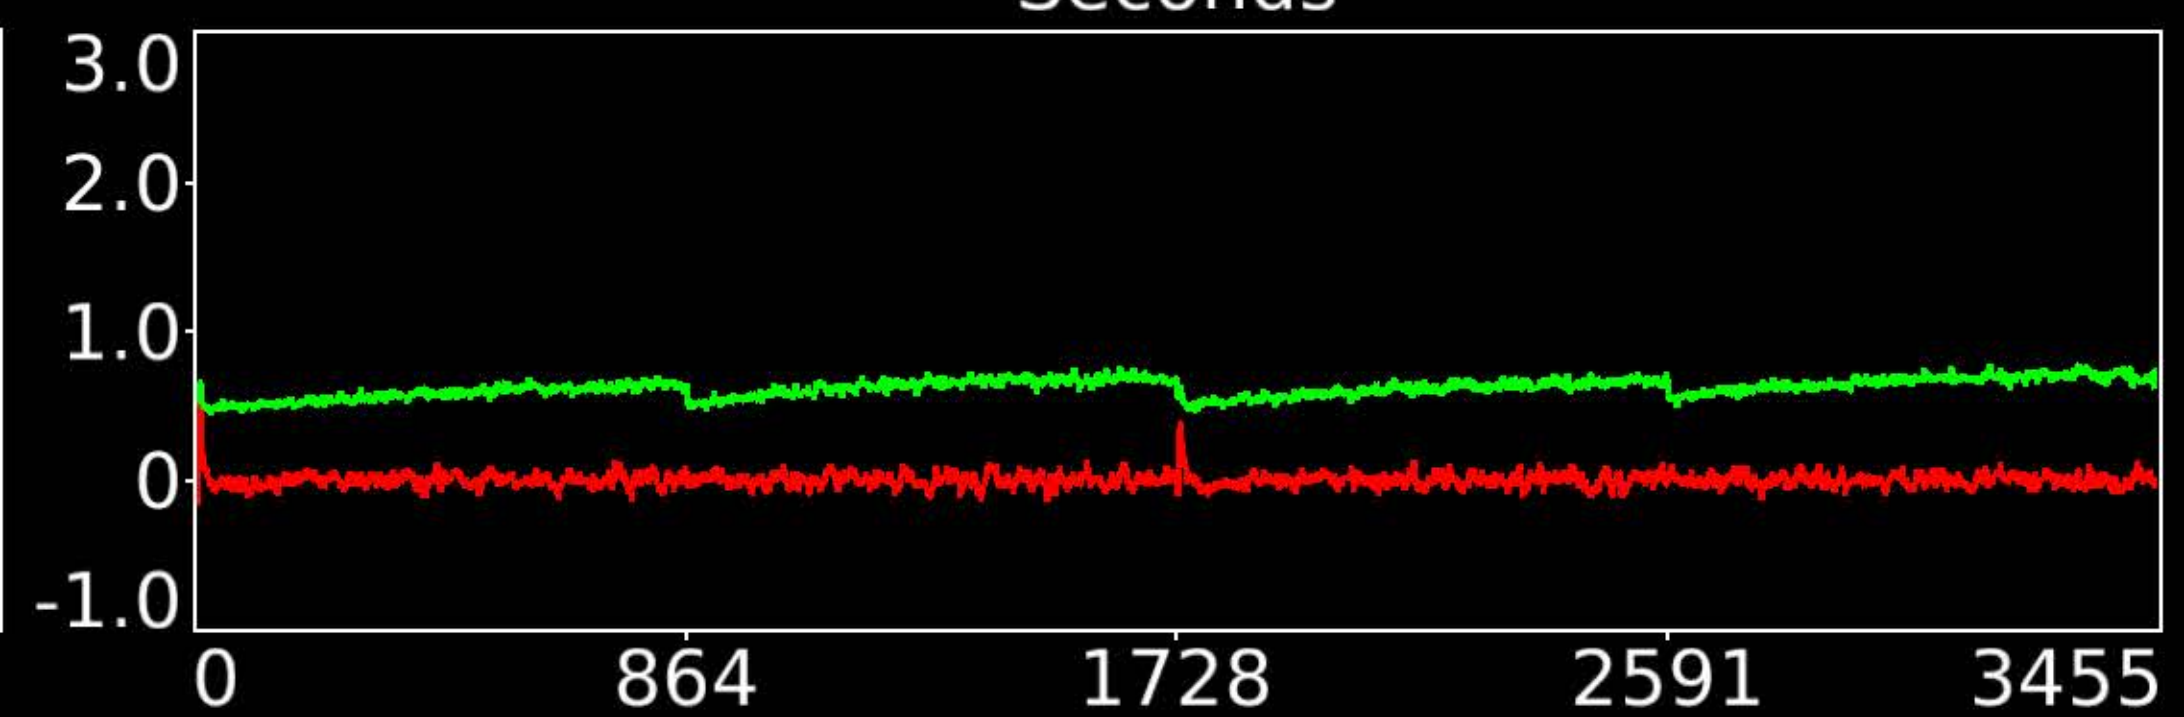

|                           |                            |                                              |  |
|---------------------------|----------------------------|----------------------------------------------|--|
| Number & Class: 49 Signal |                            | Name: Visuotopy: Peripheral Dorsal > Ventral |  |
| RVT Correlated: No        | DVARS Dip Associated: No   | Cross-Subject Variable: Yes                  |  |
| Single Subject: No        | % Variance Explained: 0.66 | Globality Index: 0.13                        |  |
| Task Component: No        | Taskr Component: No        | Sleep Noted: No                              |  |

Rationale: Spatial map includes positive and negative patches that respect known retinotopic visual organization (Lower vs Upper)



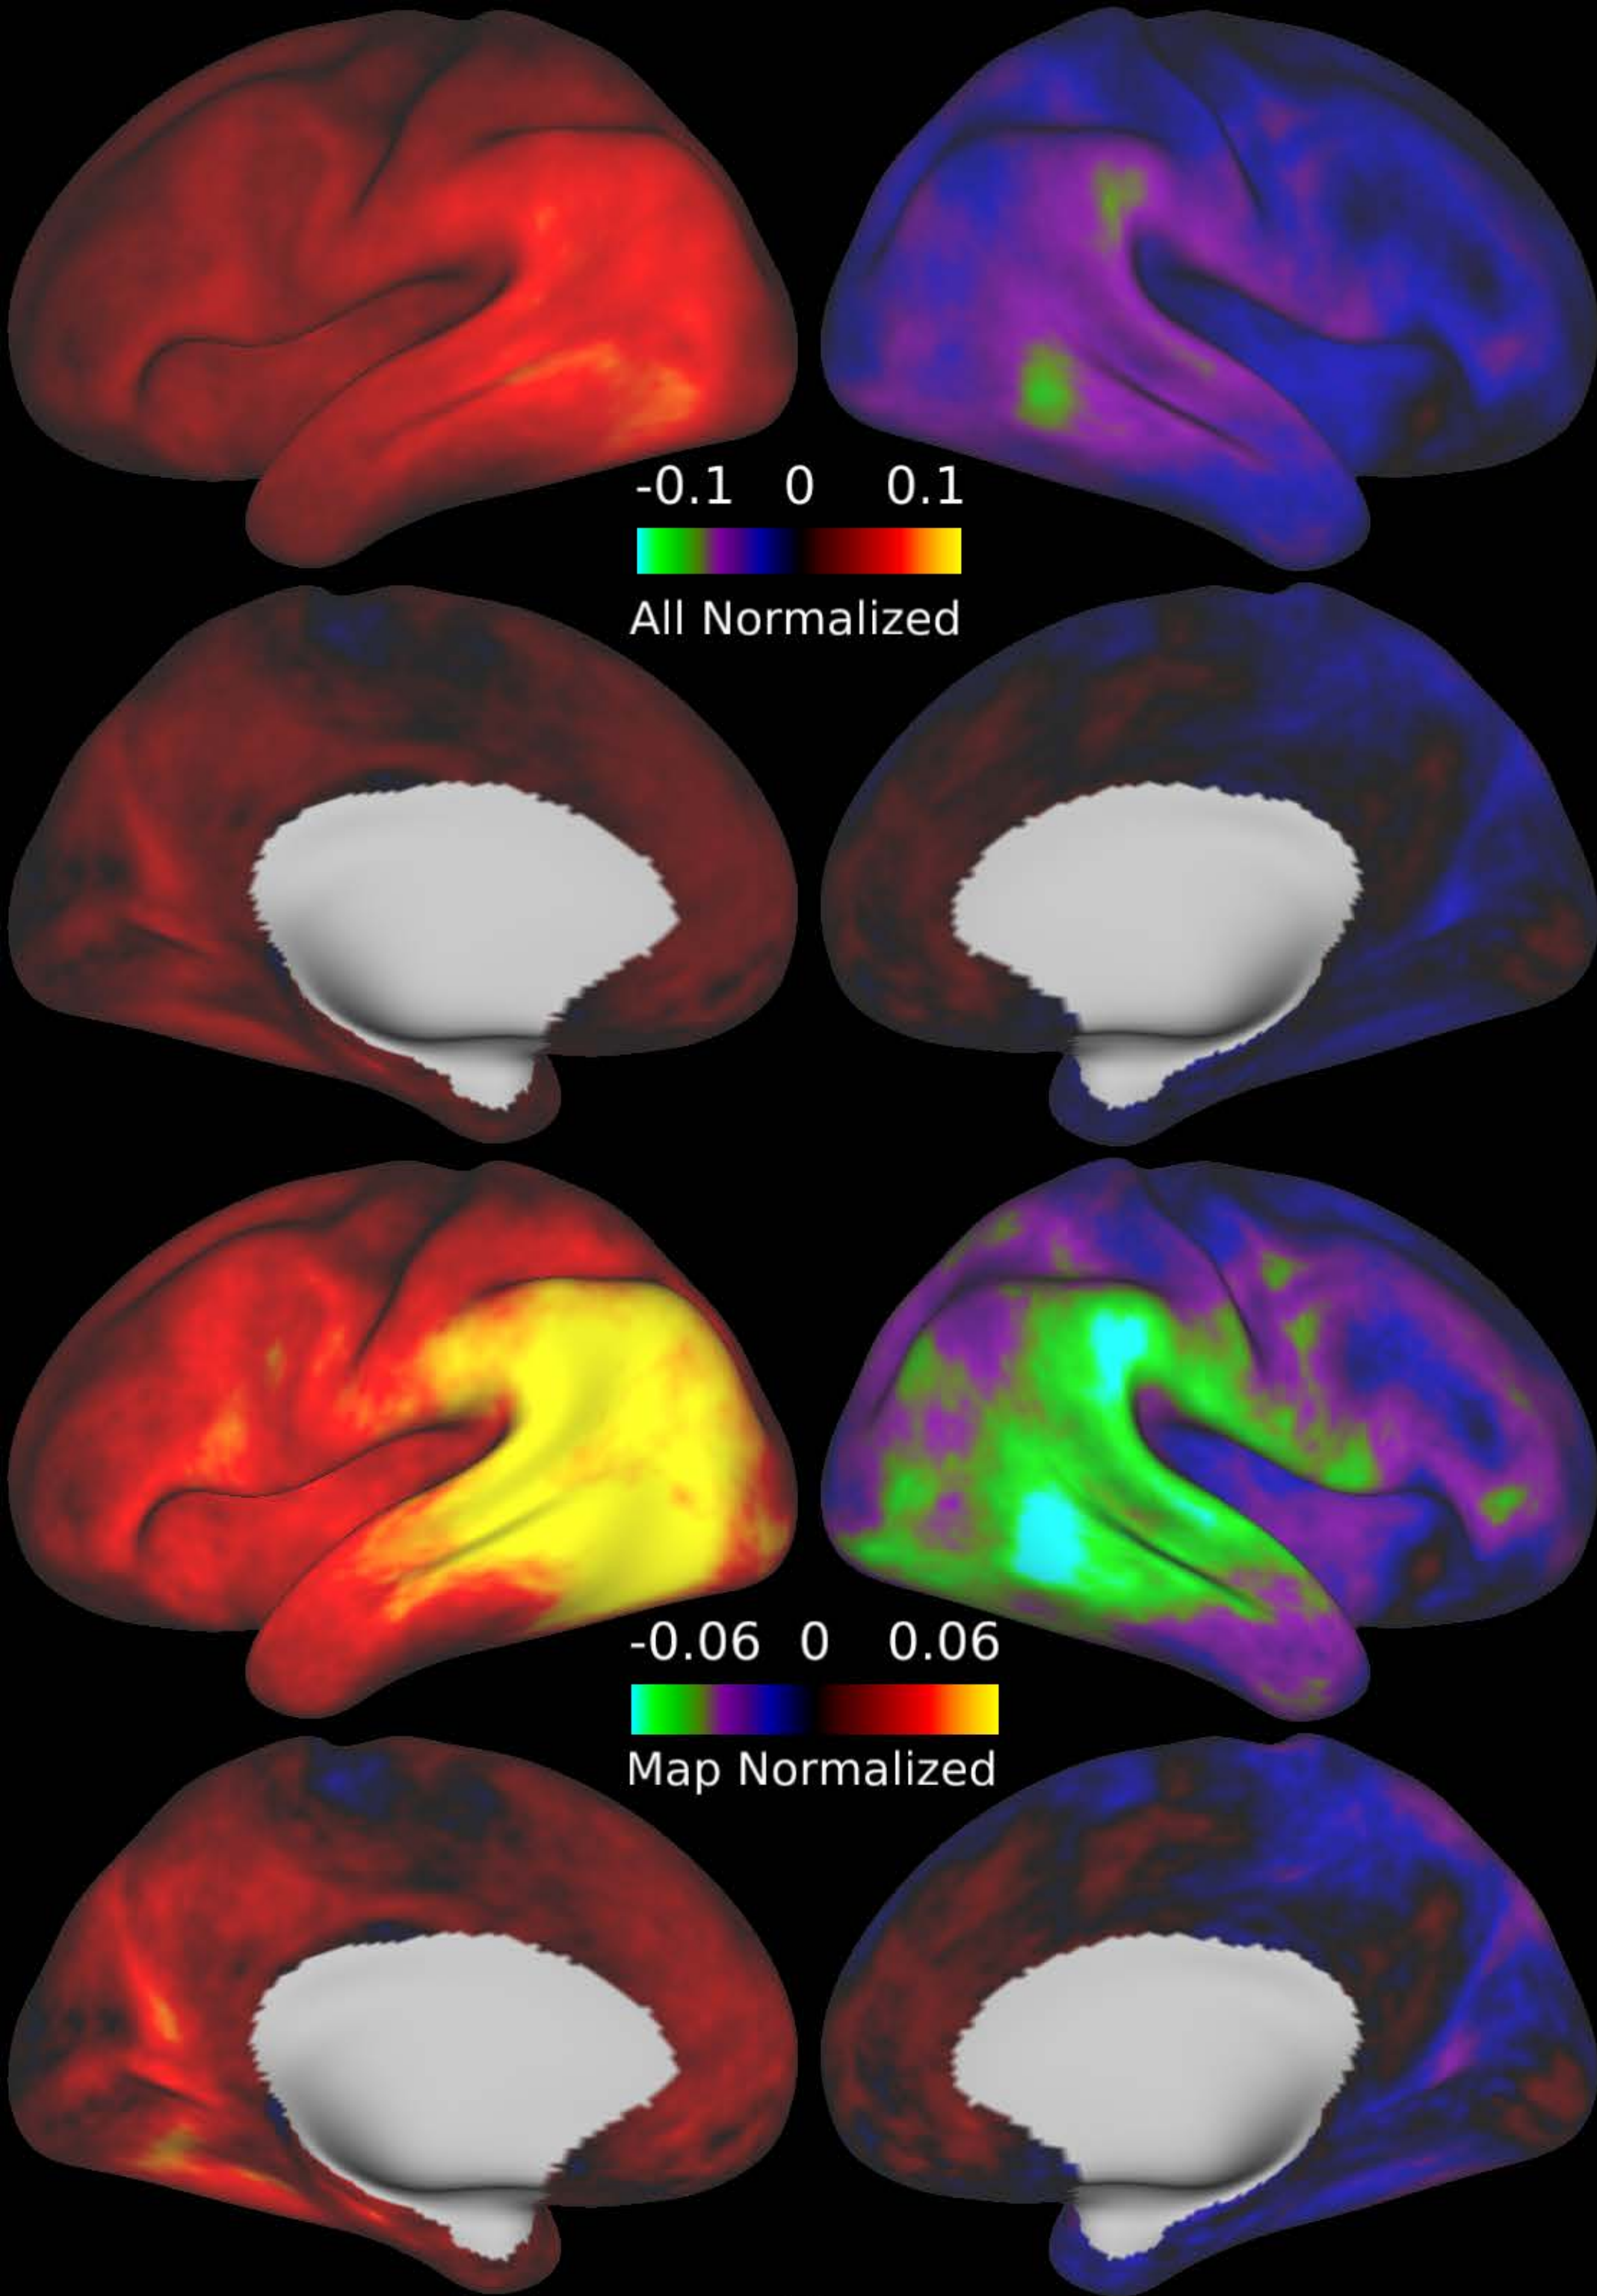

Hertz

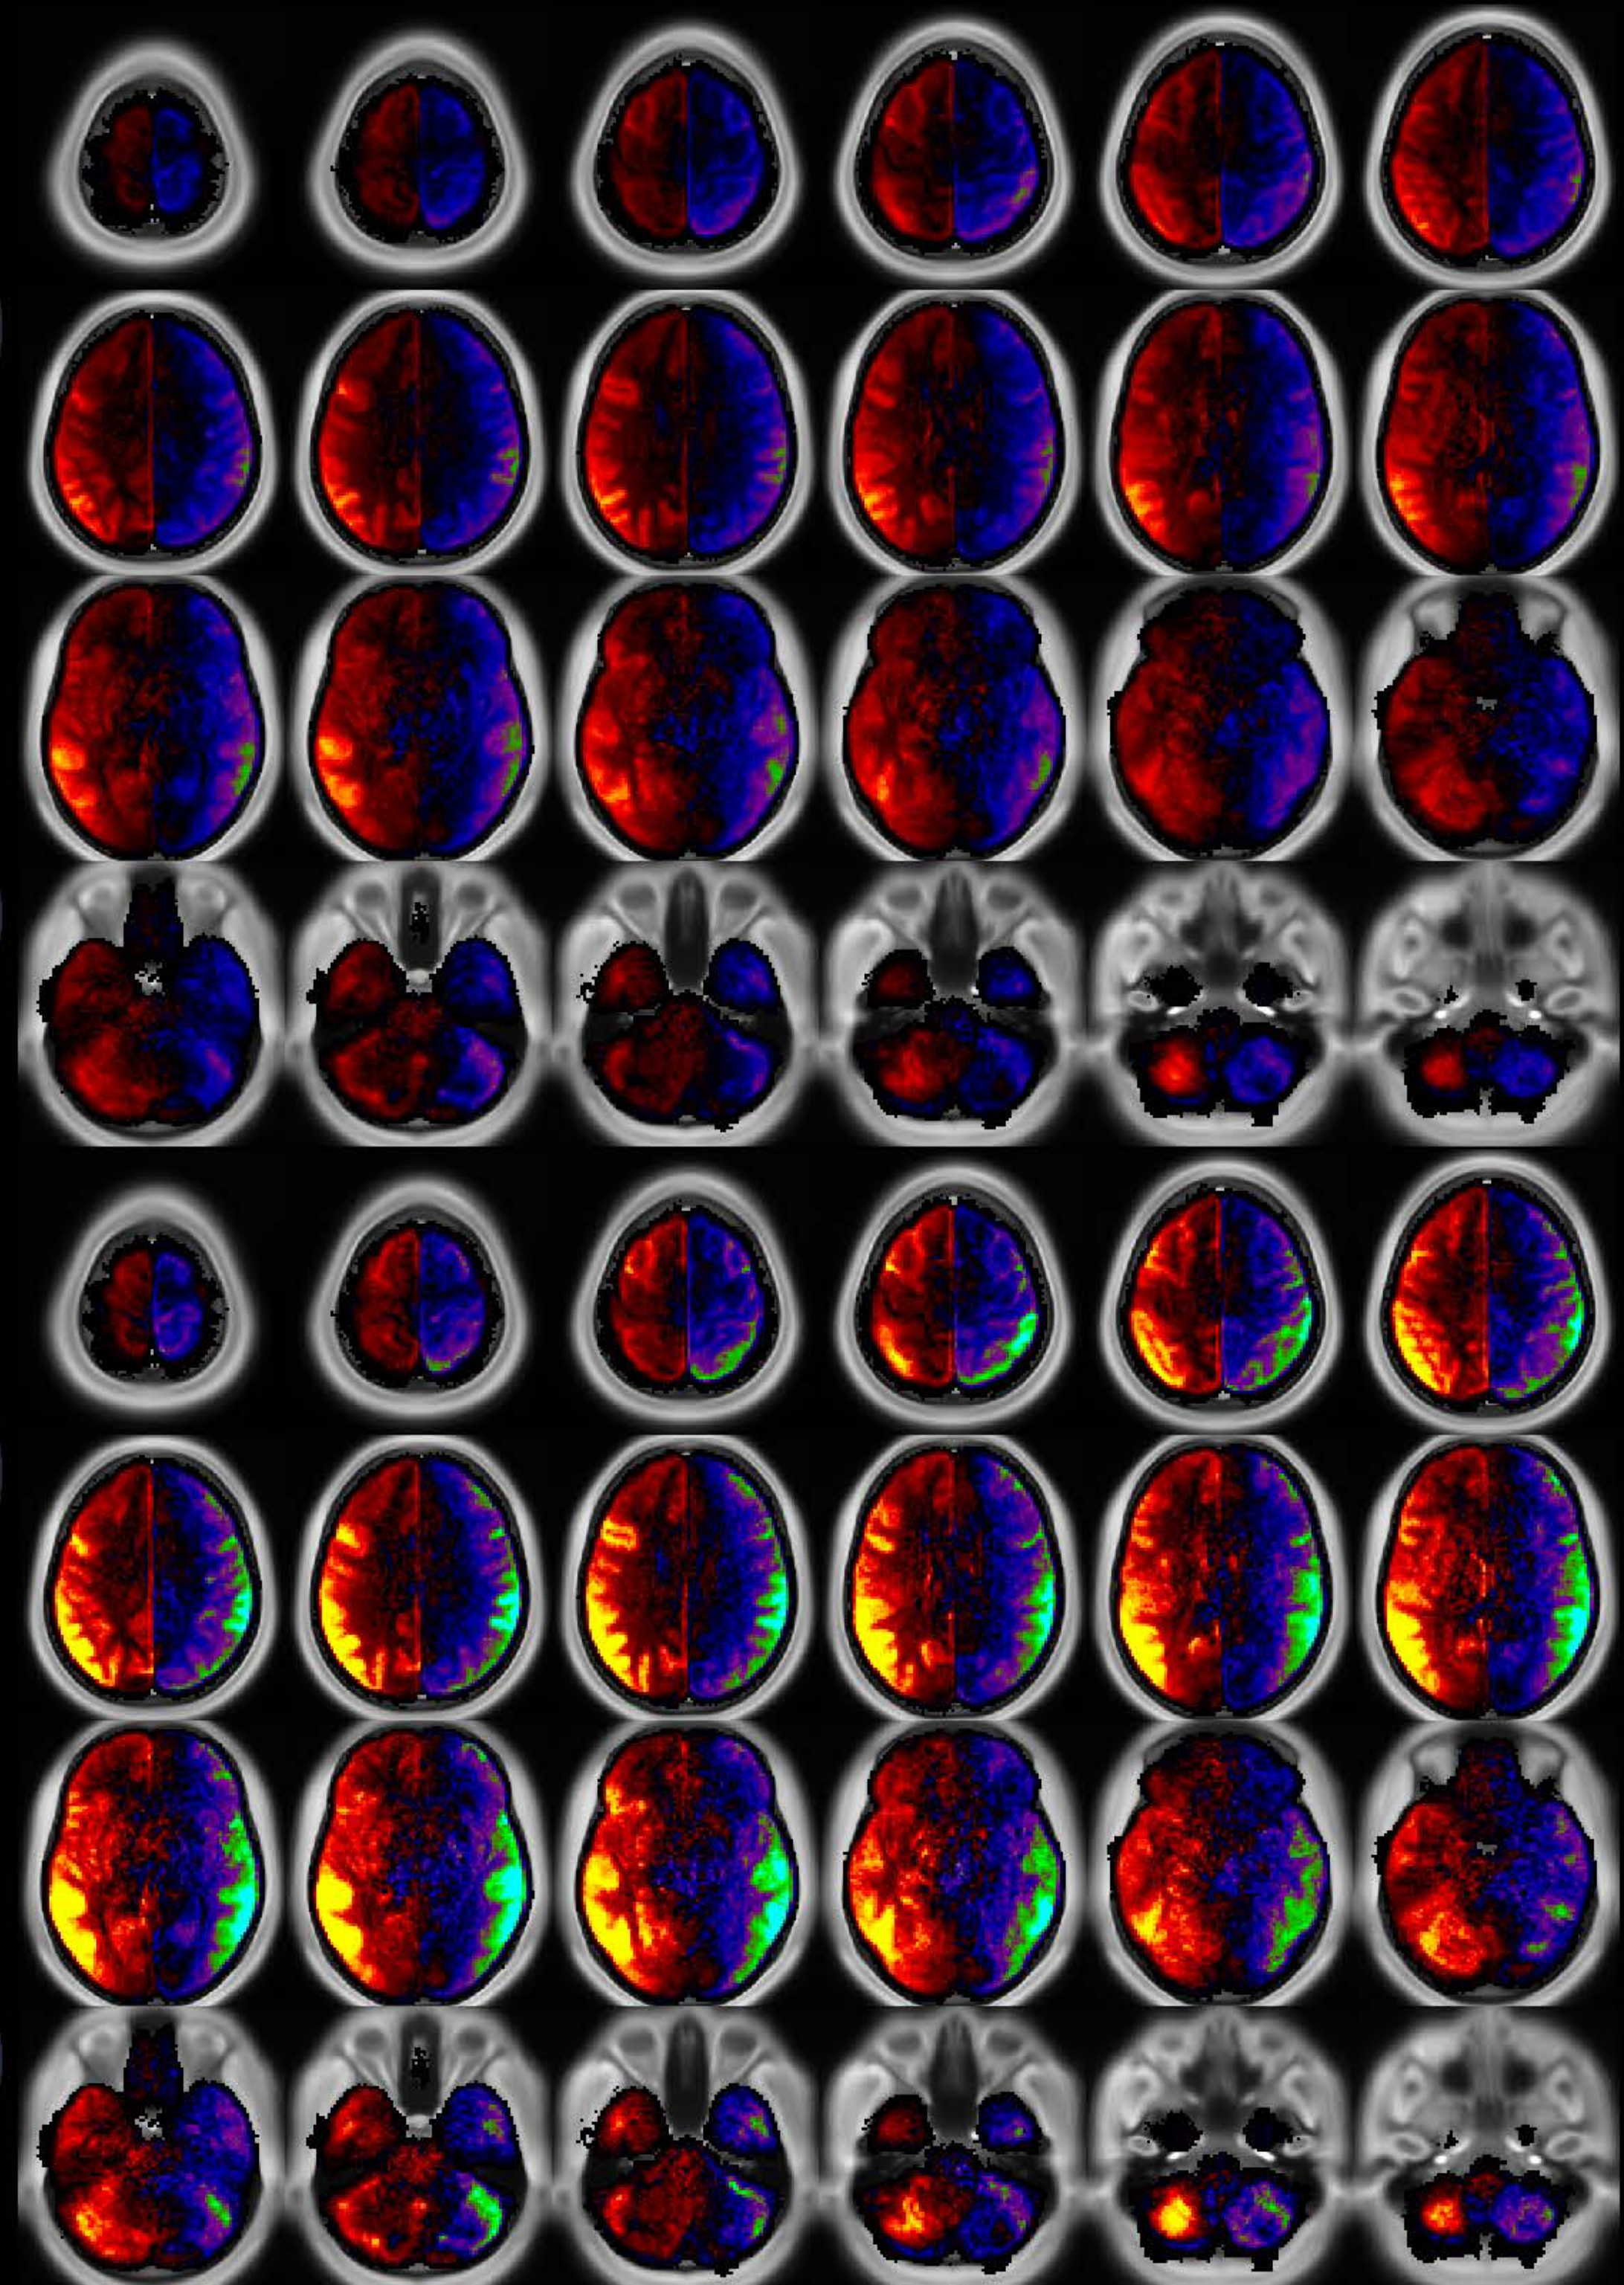

Seconds

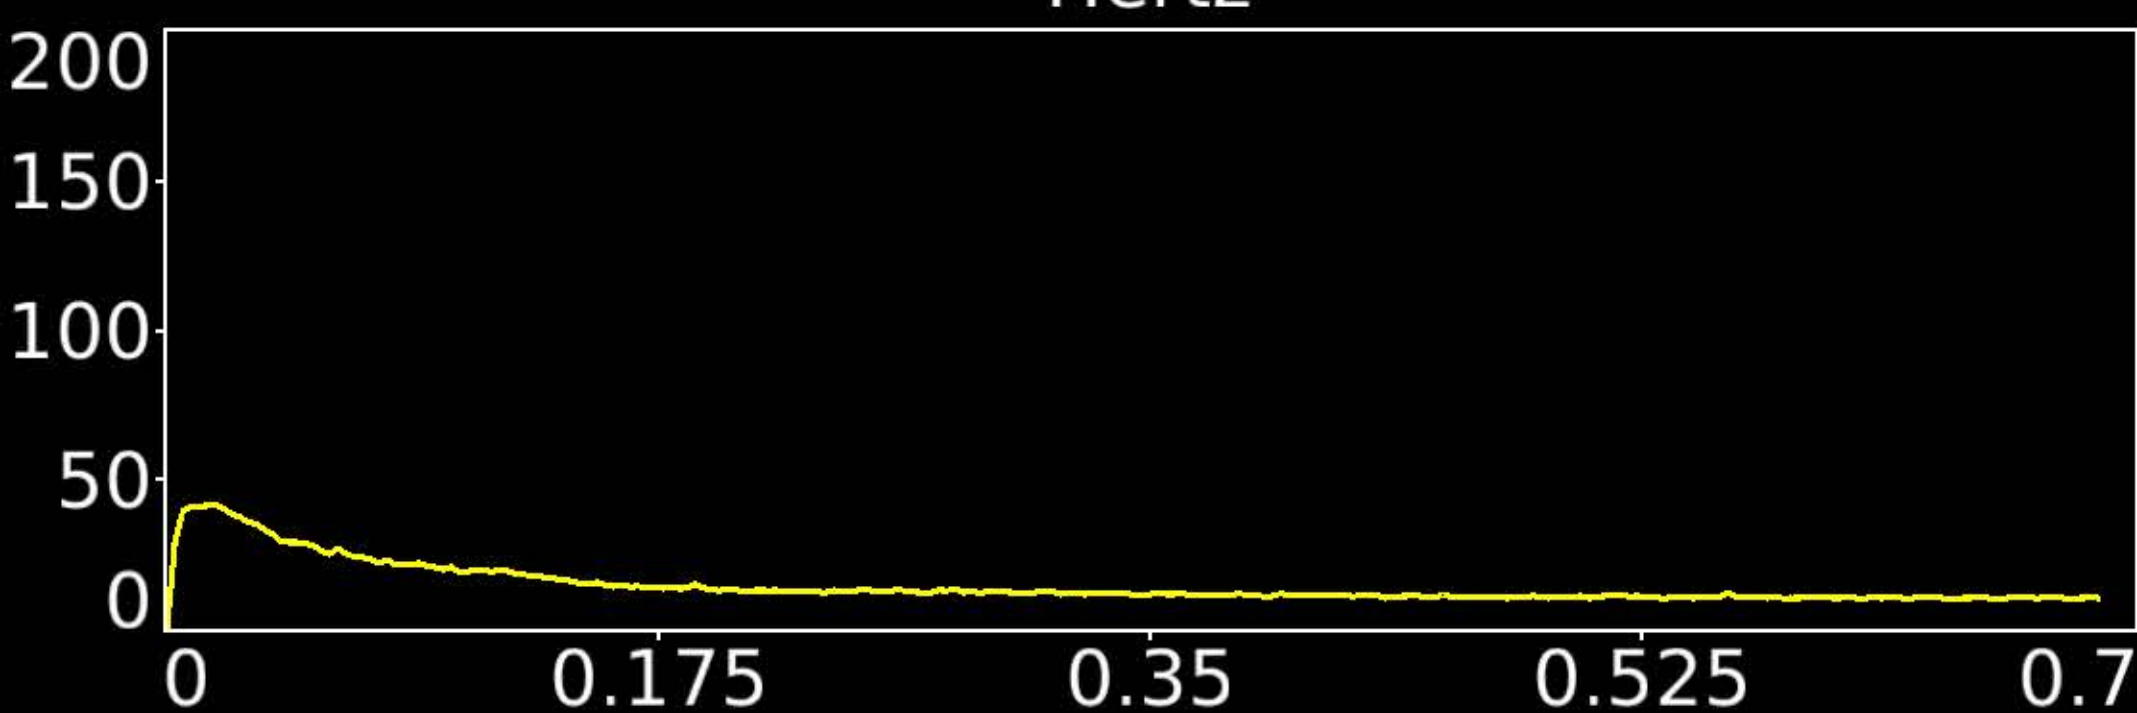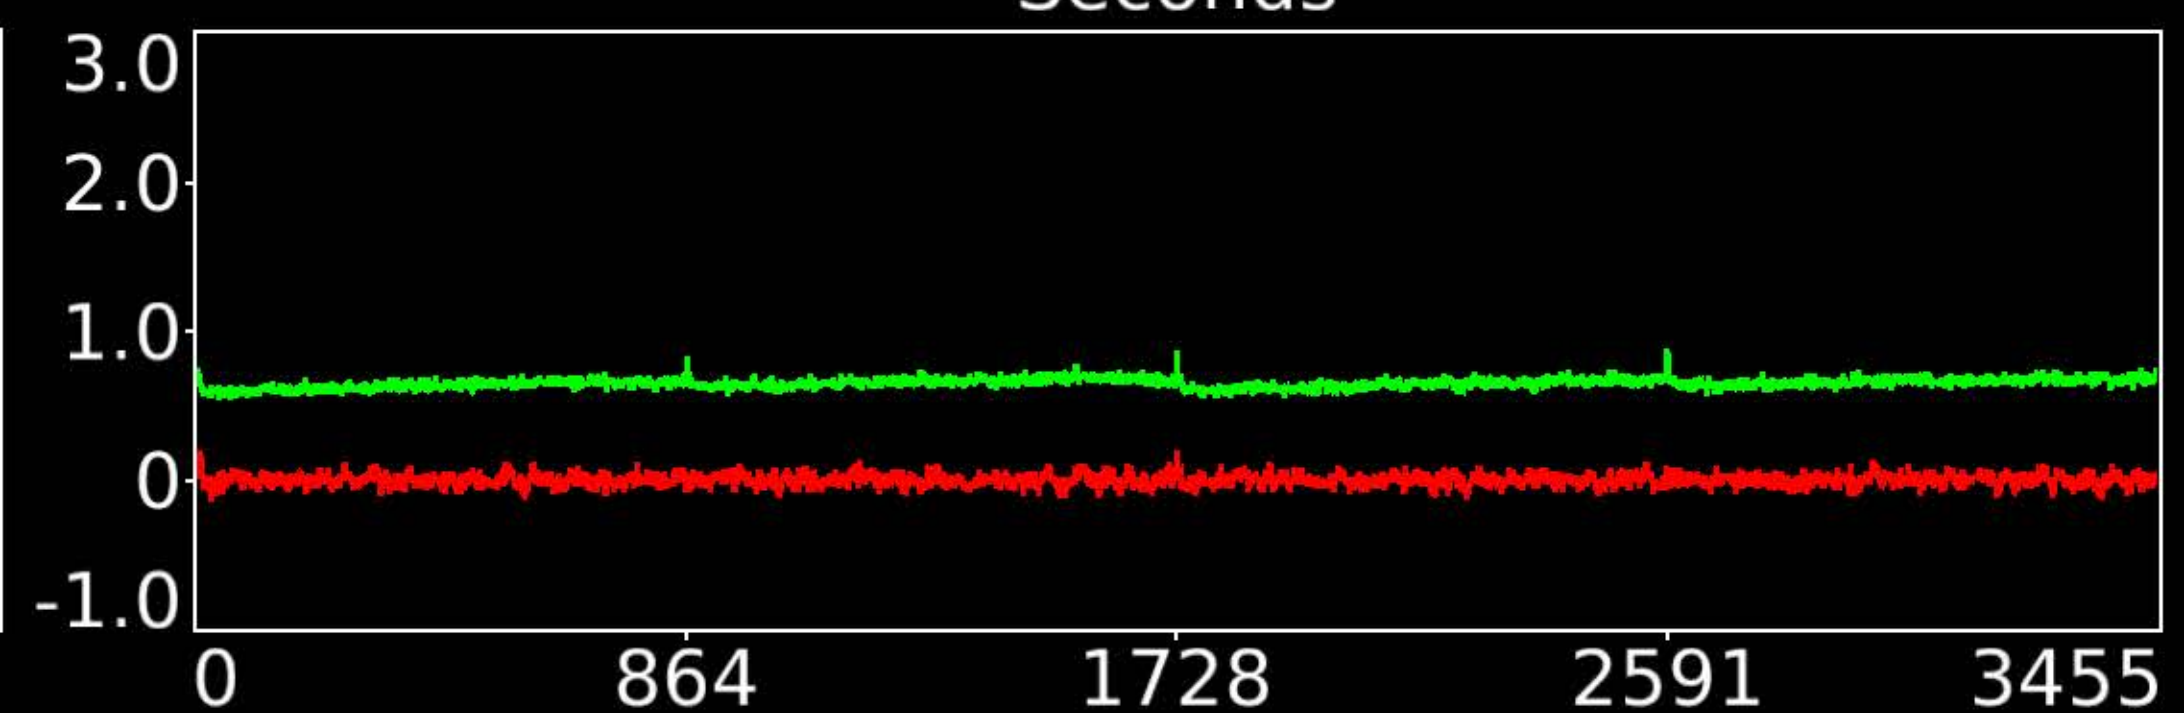

|                                                                                                        |                            |                             |  |
|--------------------------------------------------------------------------------------------------------|----------------------------|-----------------------------|--|
| Number & Class: 50 Noise                                                                               |                            | Name: L>R Movement Artifact |  |
| RVT Correlated: No                                                                                     | DVARS Dip Associated: Yes  | Cross-Subject Variable: No  |  |
| Single Subject: No                                                                                     | % Variance Explained: 0.65 | Globality Index: 0.29       |  |
| Task Component: 51                                                                                     | Taskr Component: 37        | Sleep Noted: No             |  |
| Rationale: Highly DVARS Dips associated component; looks like movement regressor beta map (Z rotation) |                            |                             |  |



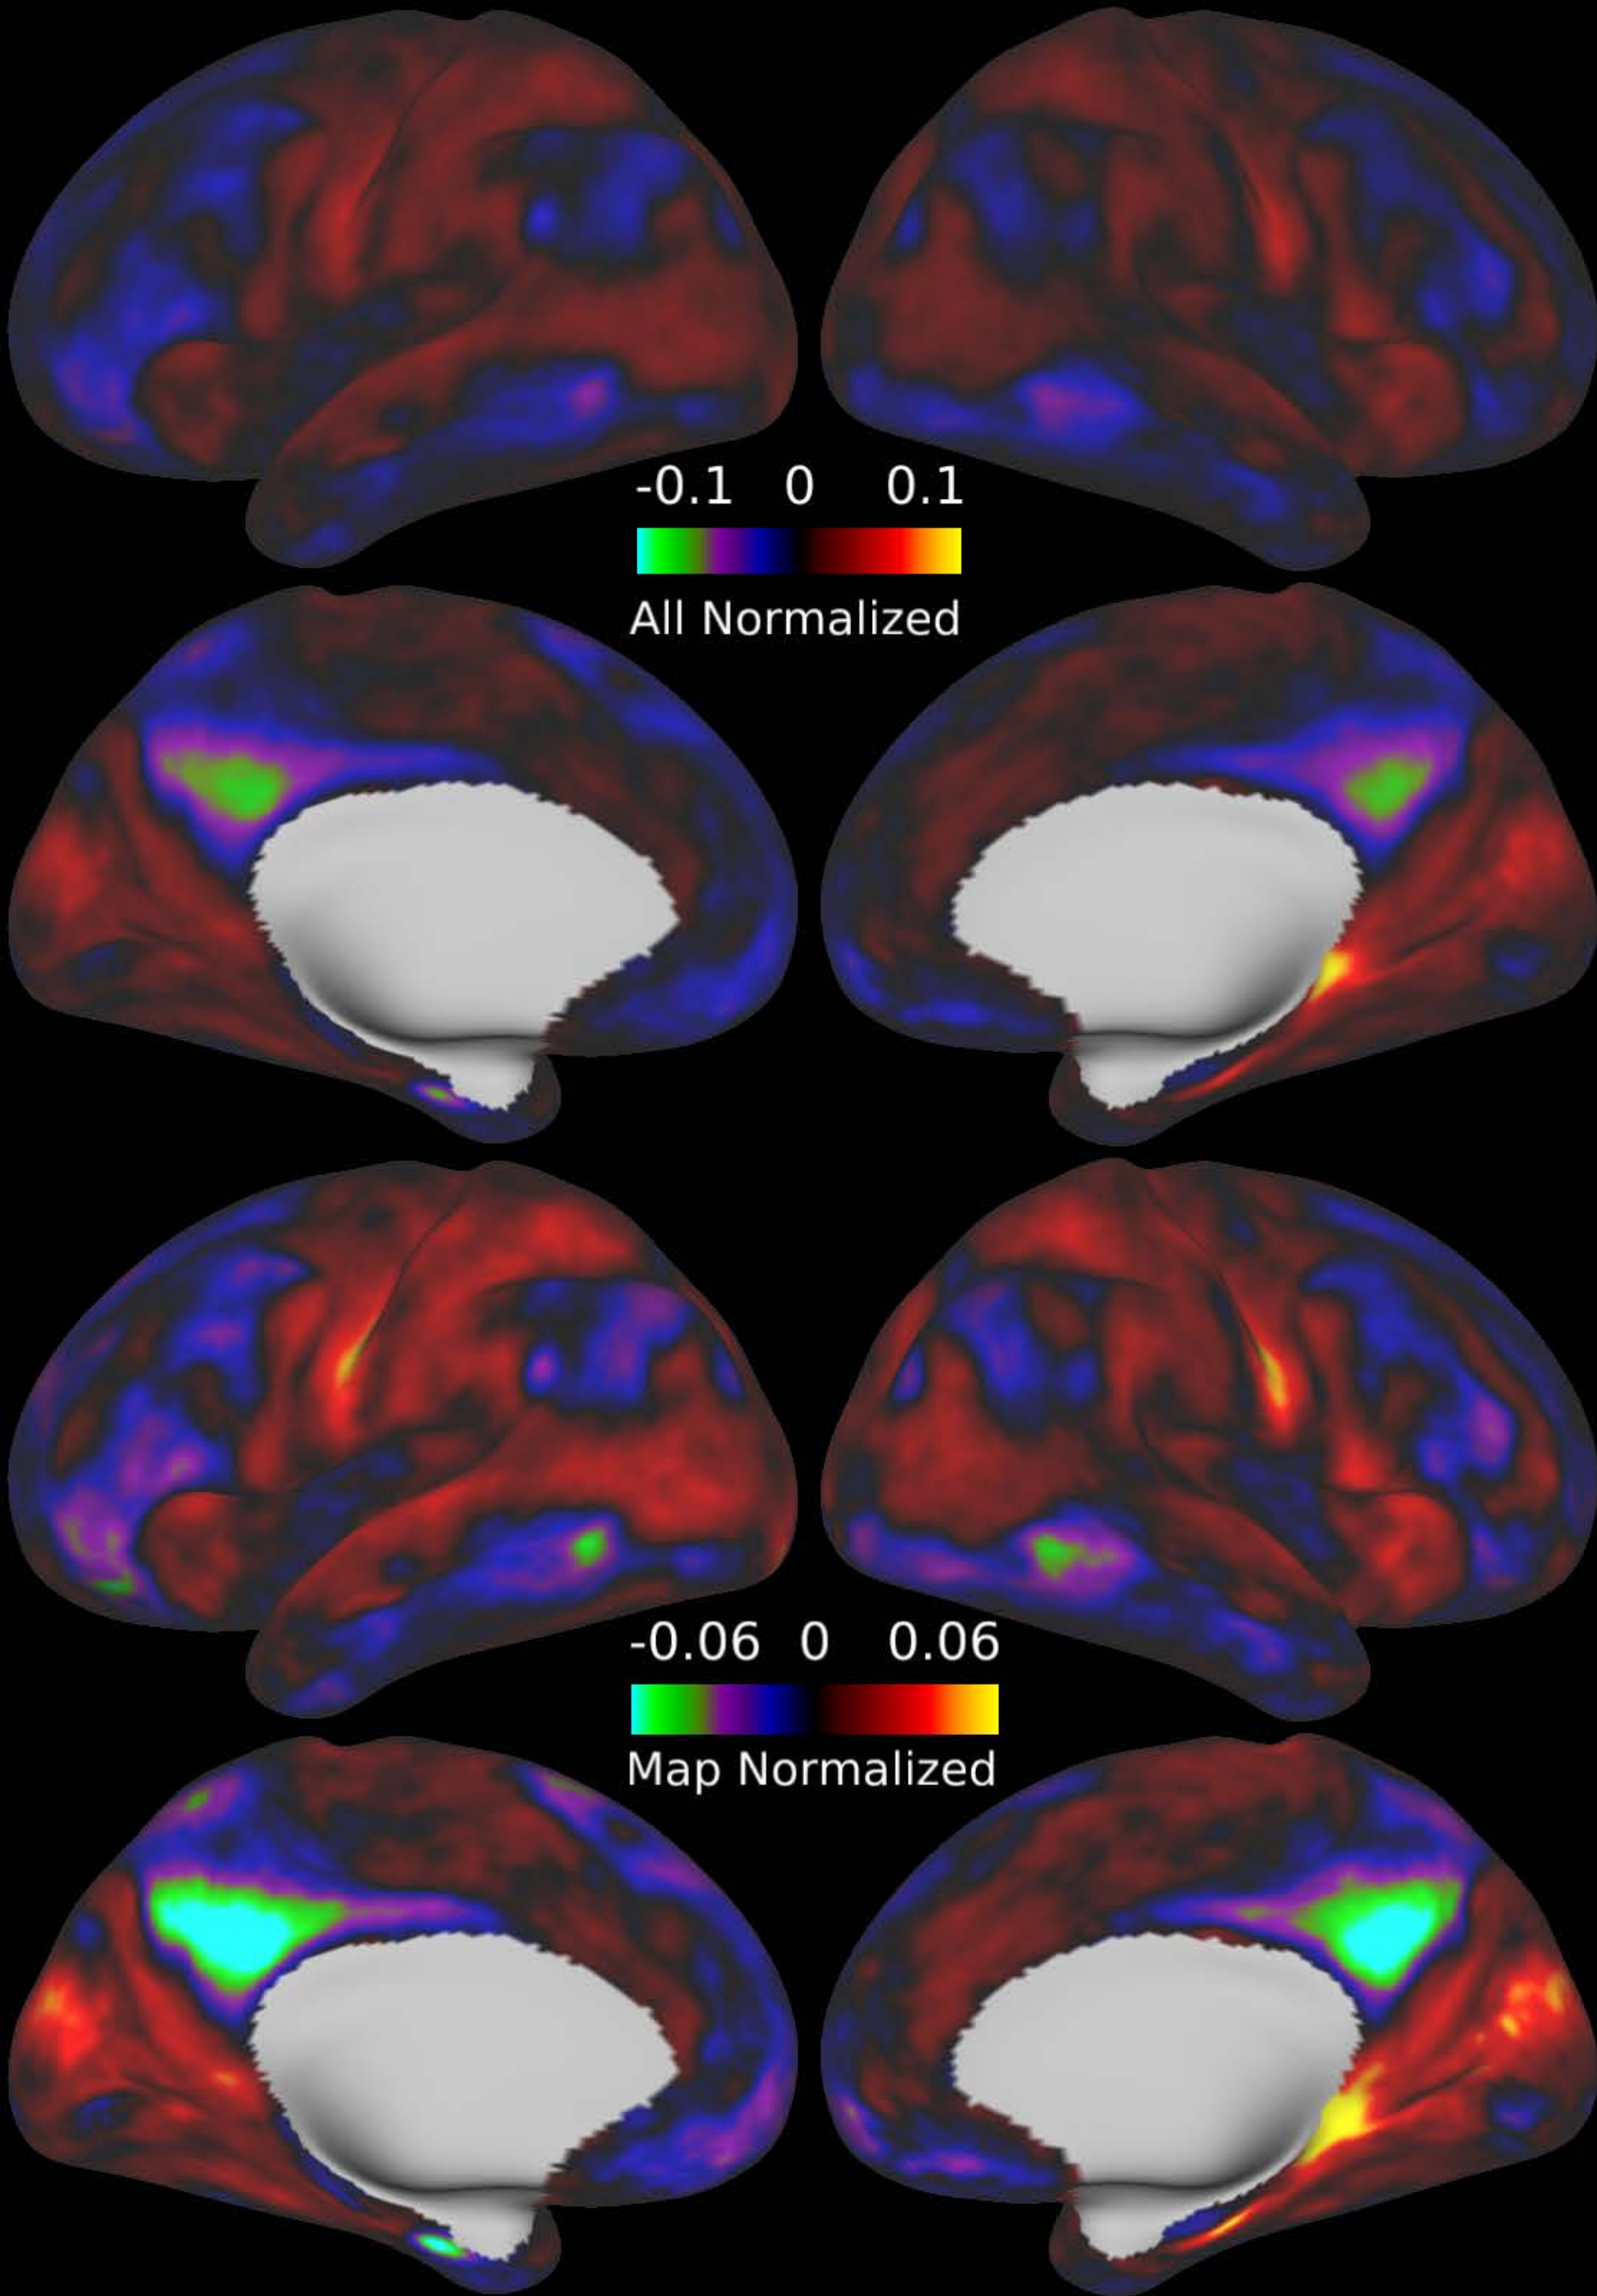

Hertz

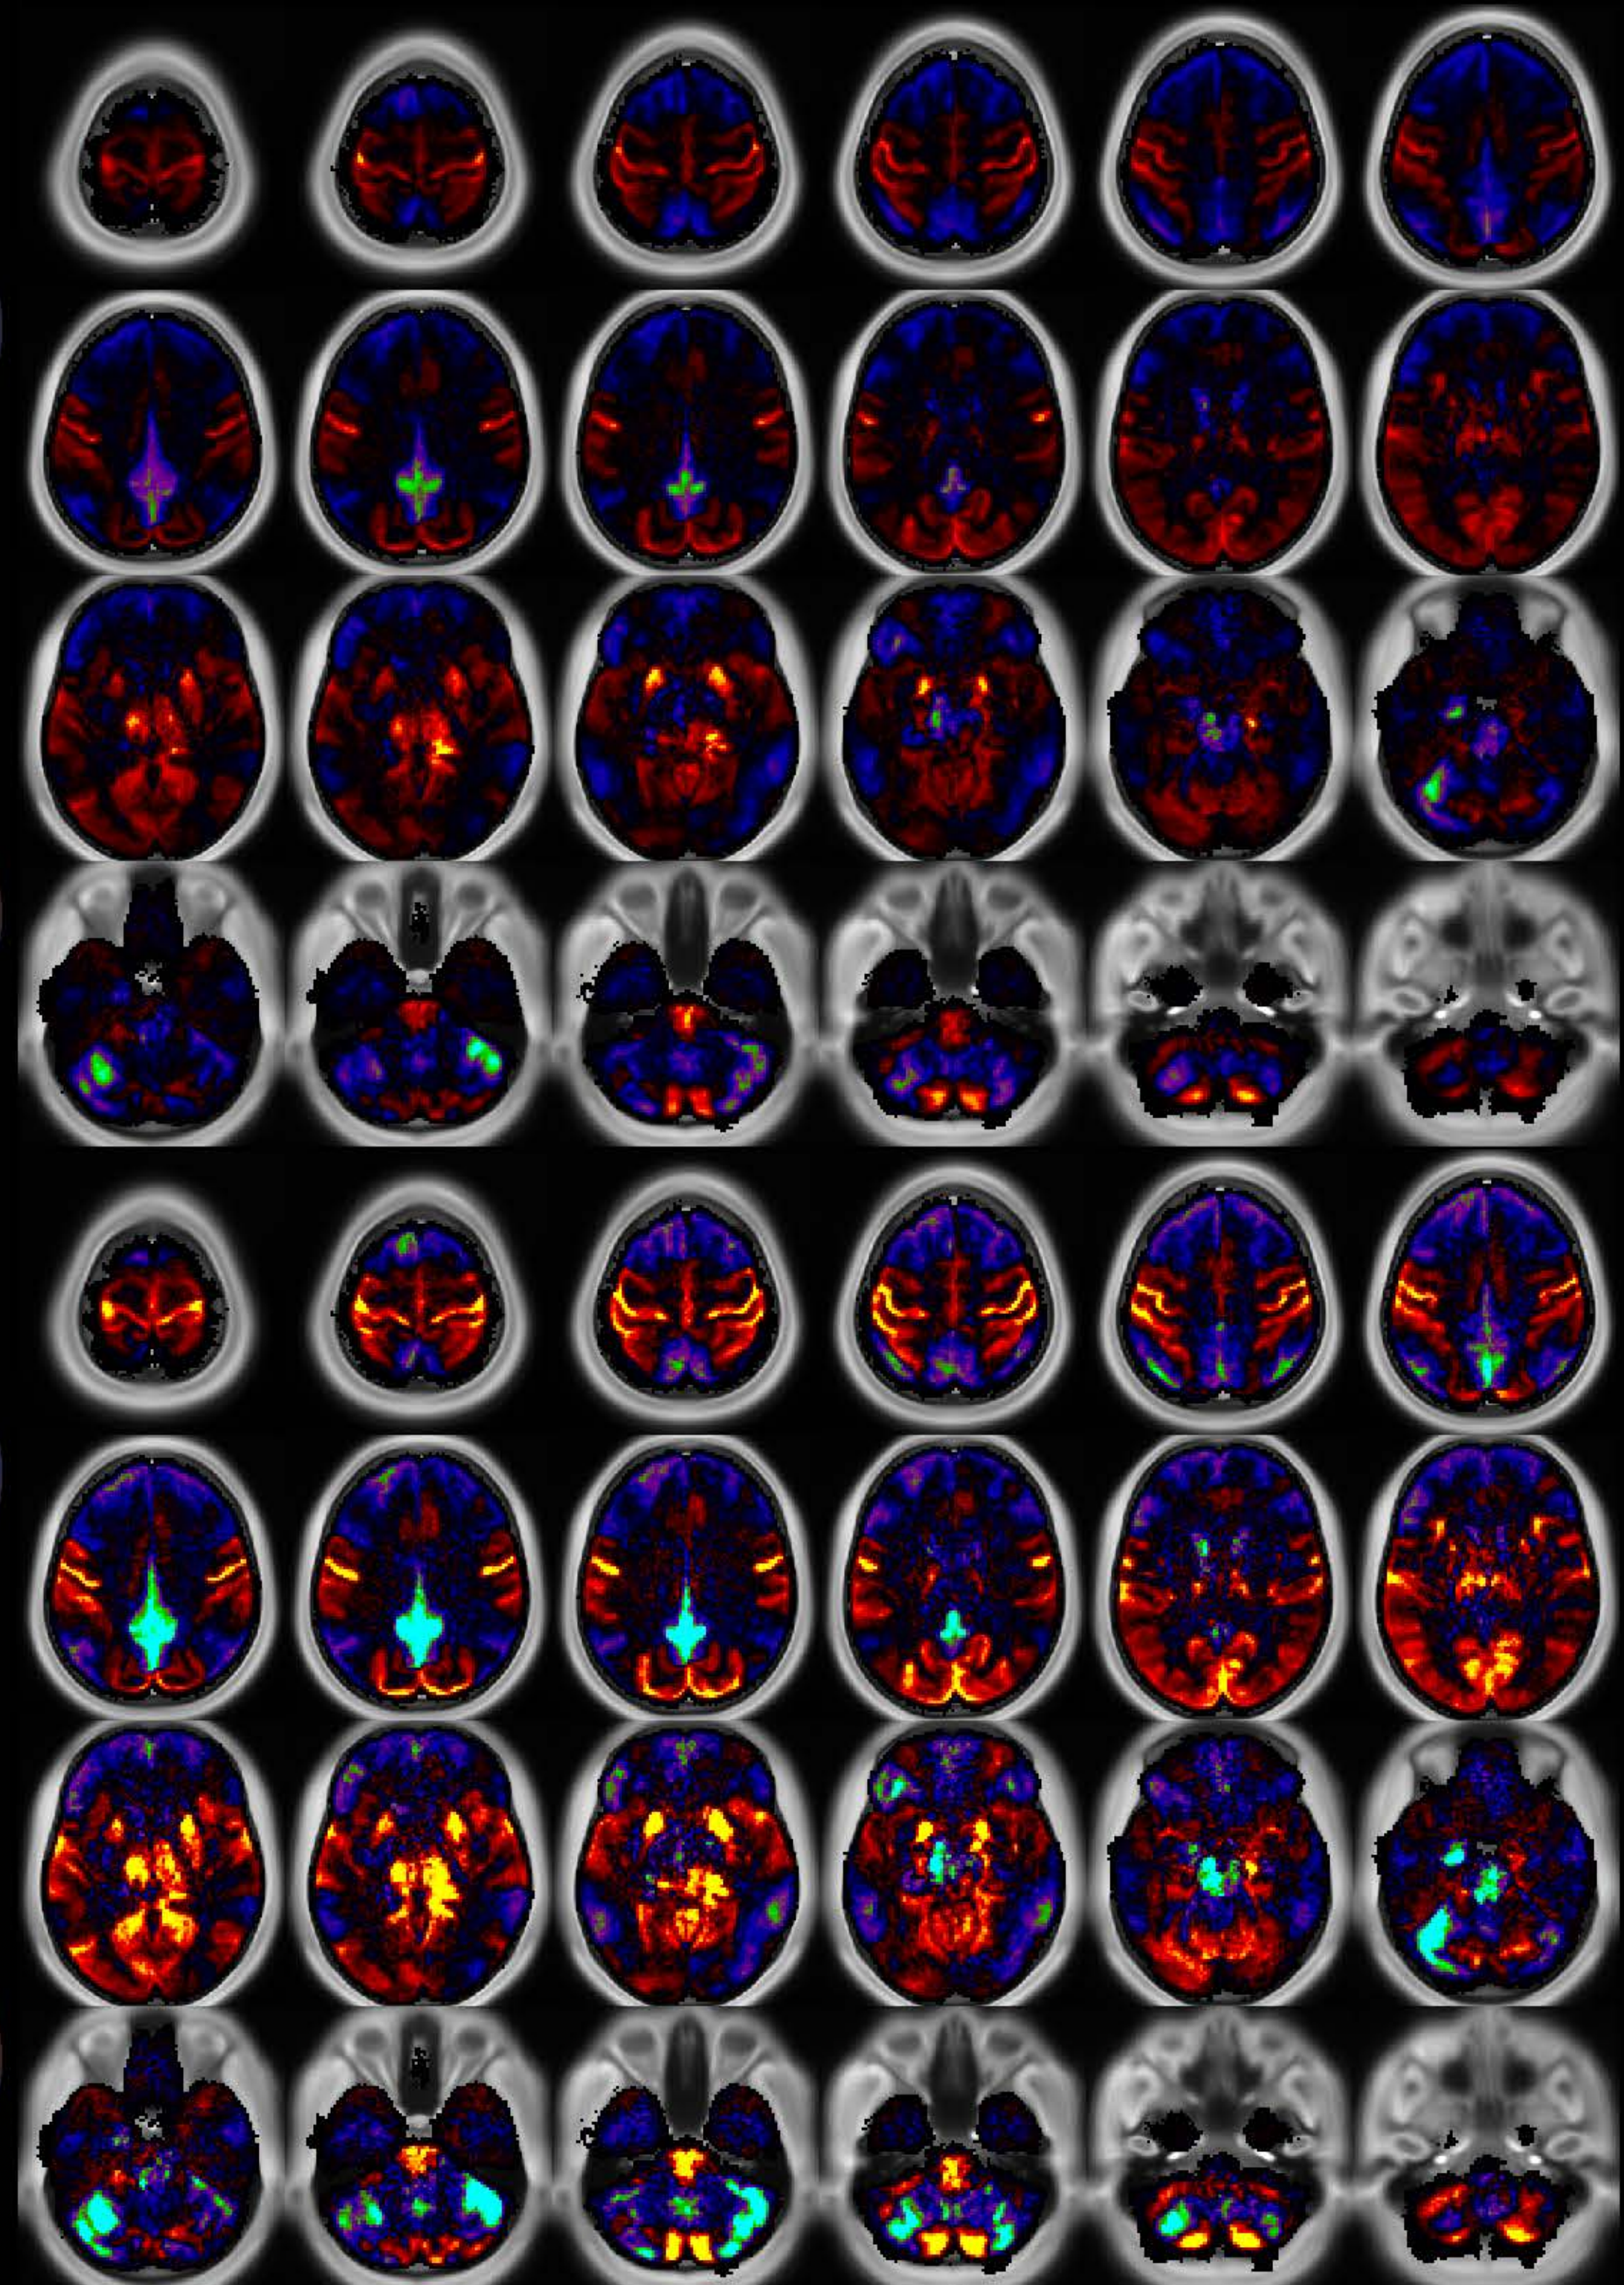

Seconds

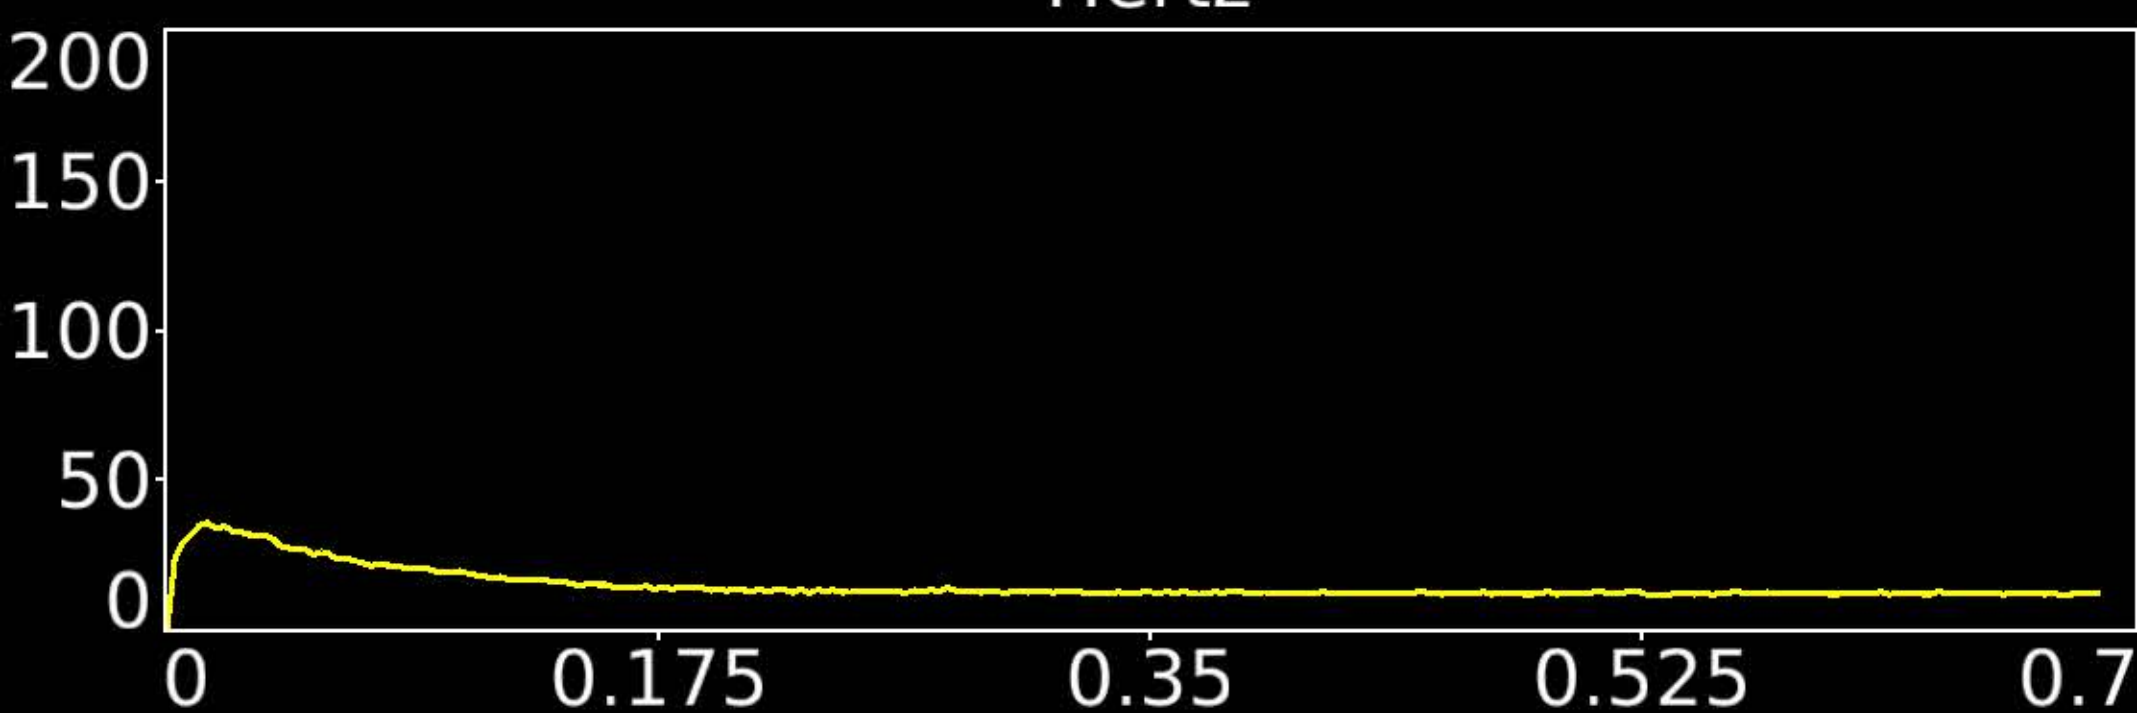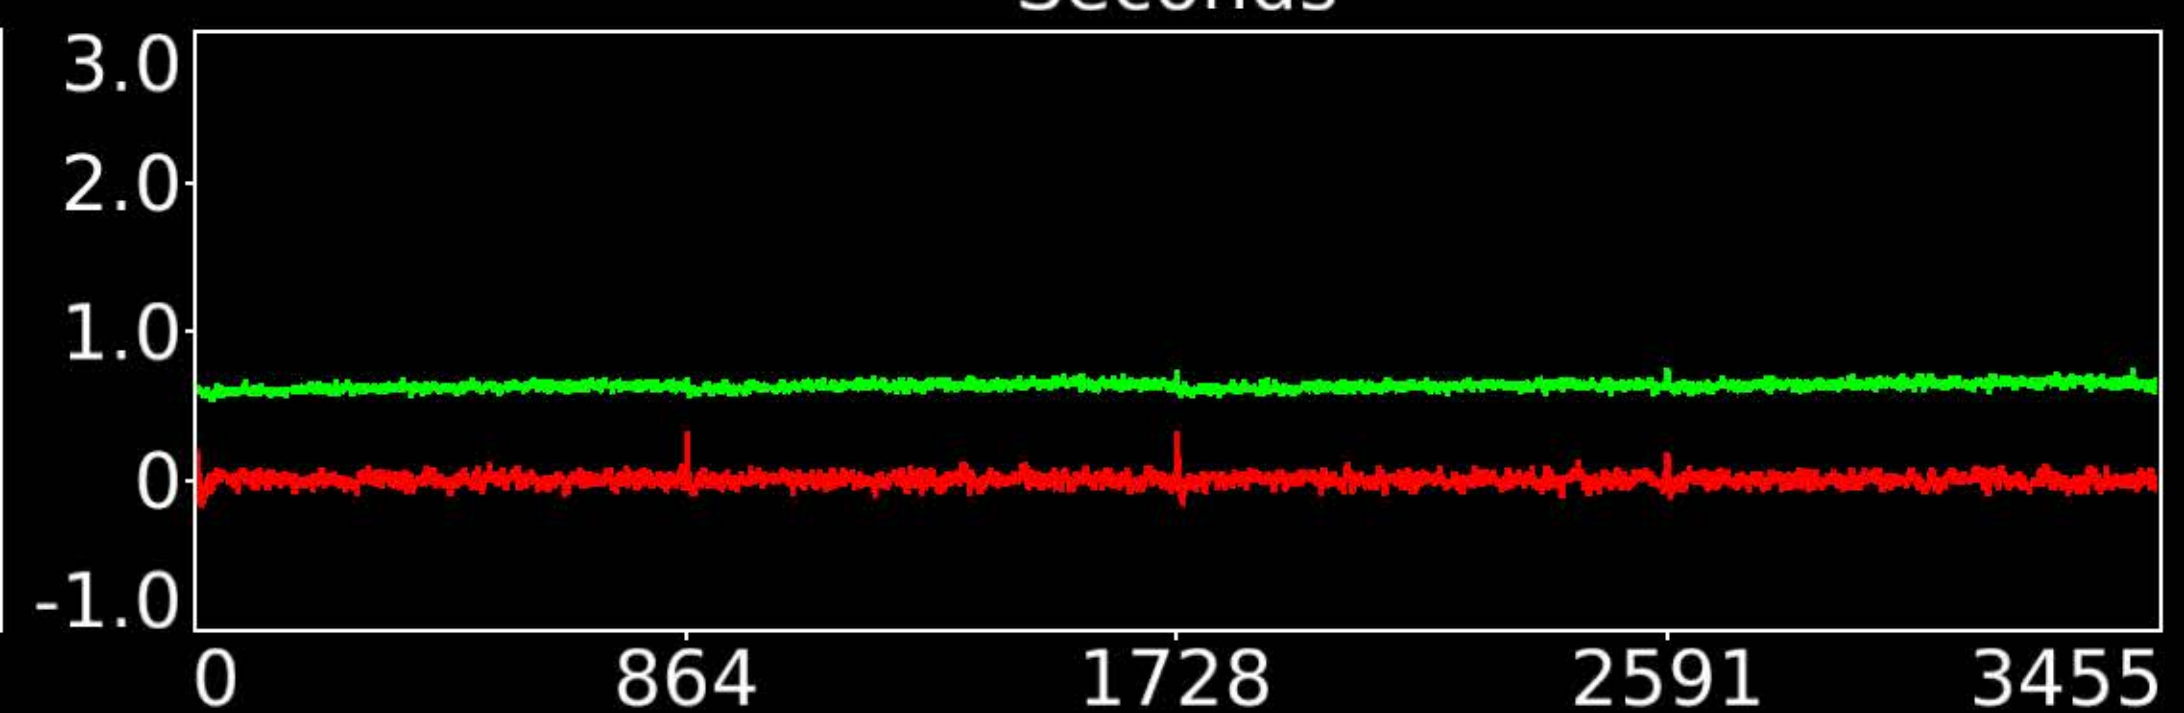

|                                                                                |                            |                                                                |  |
|--------------------------------------------------------------------------------|----------------------------|----------------------------------------------------------------|--|
| Number & Class: 51 Noise                                                       |                            | Name: Single Run of Single Subject: Highly Globally Correlated |  |
| RVT Correlated: No                                                             | DVARS Dip Associated: No   | Cross-Subject Variable: No                                     |  |
| Single Subject: Yes                                                            | % Variance Explained: 0.61 | Globality Index: 0.45                                          |  |
| Task Component: No                                                             | Taskr Component: No        | Sleep Noted: No                                                |  |
| Rationale: Single subject component with high correlation to global timecourse |                            |                                                                |  |



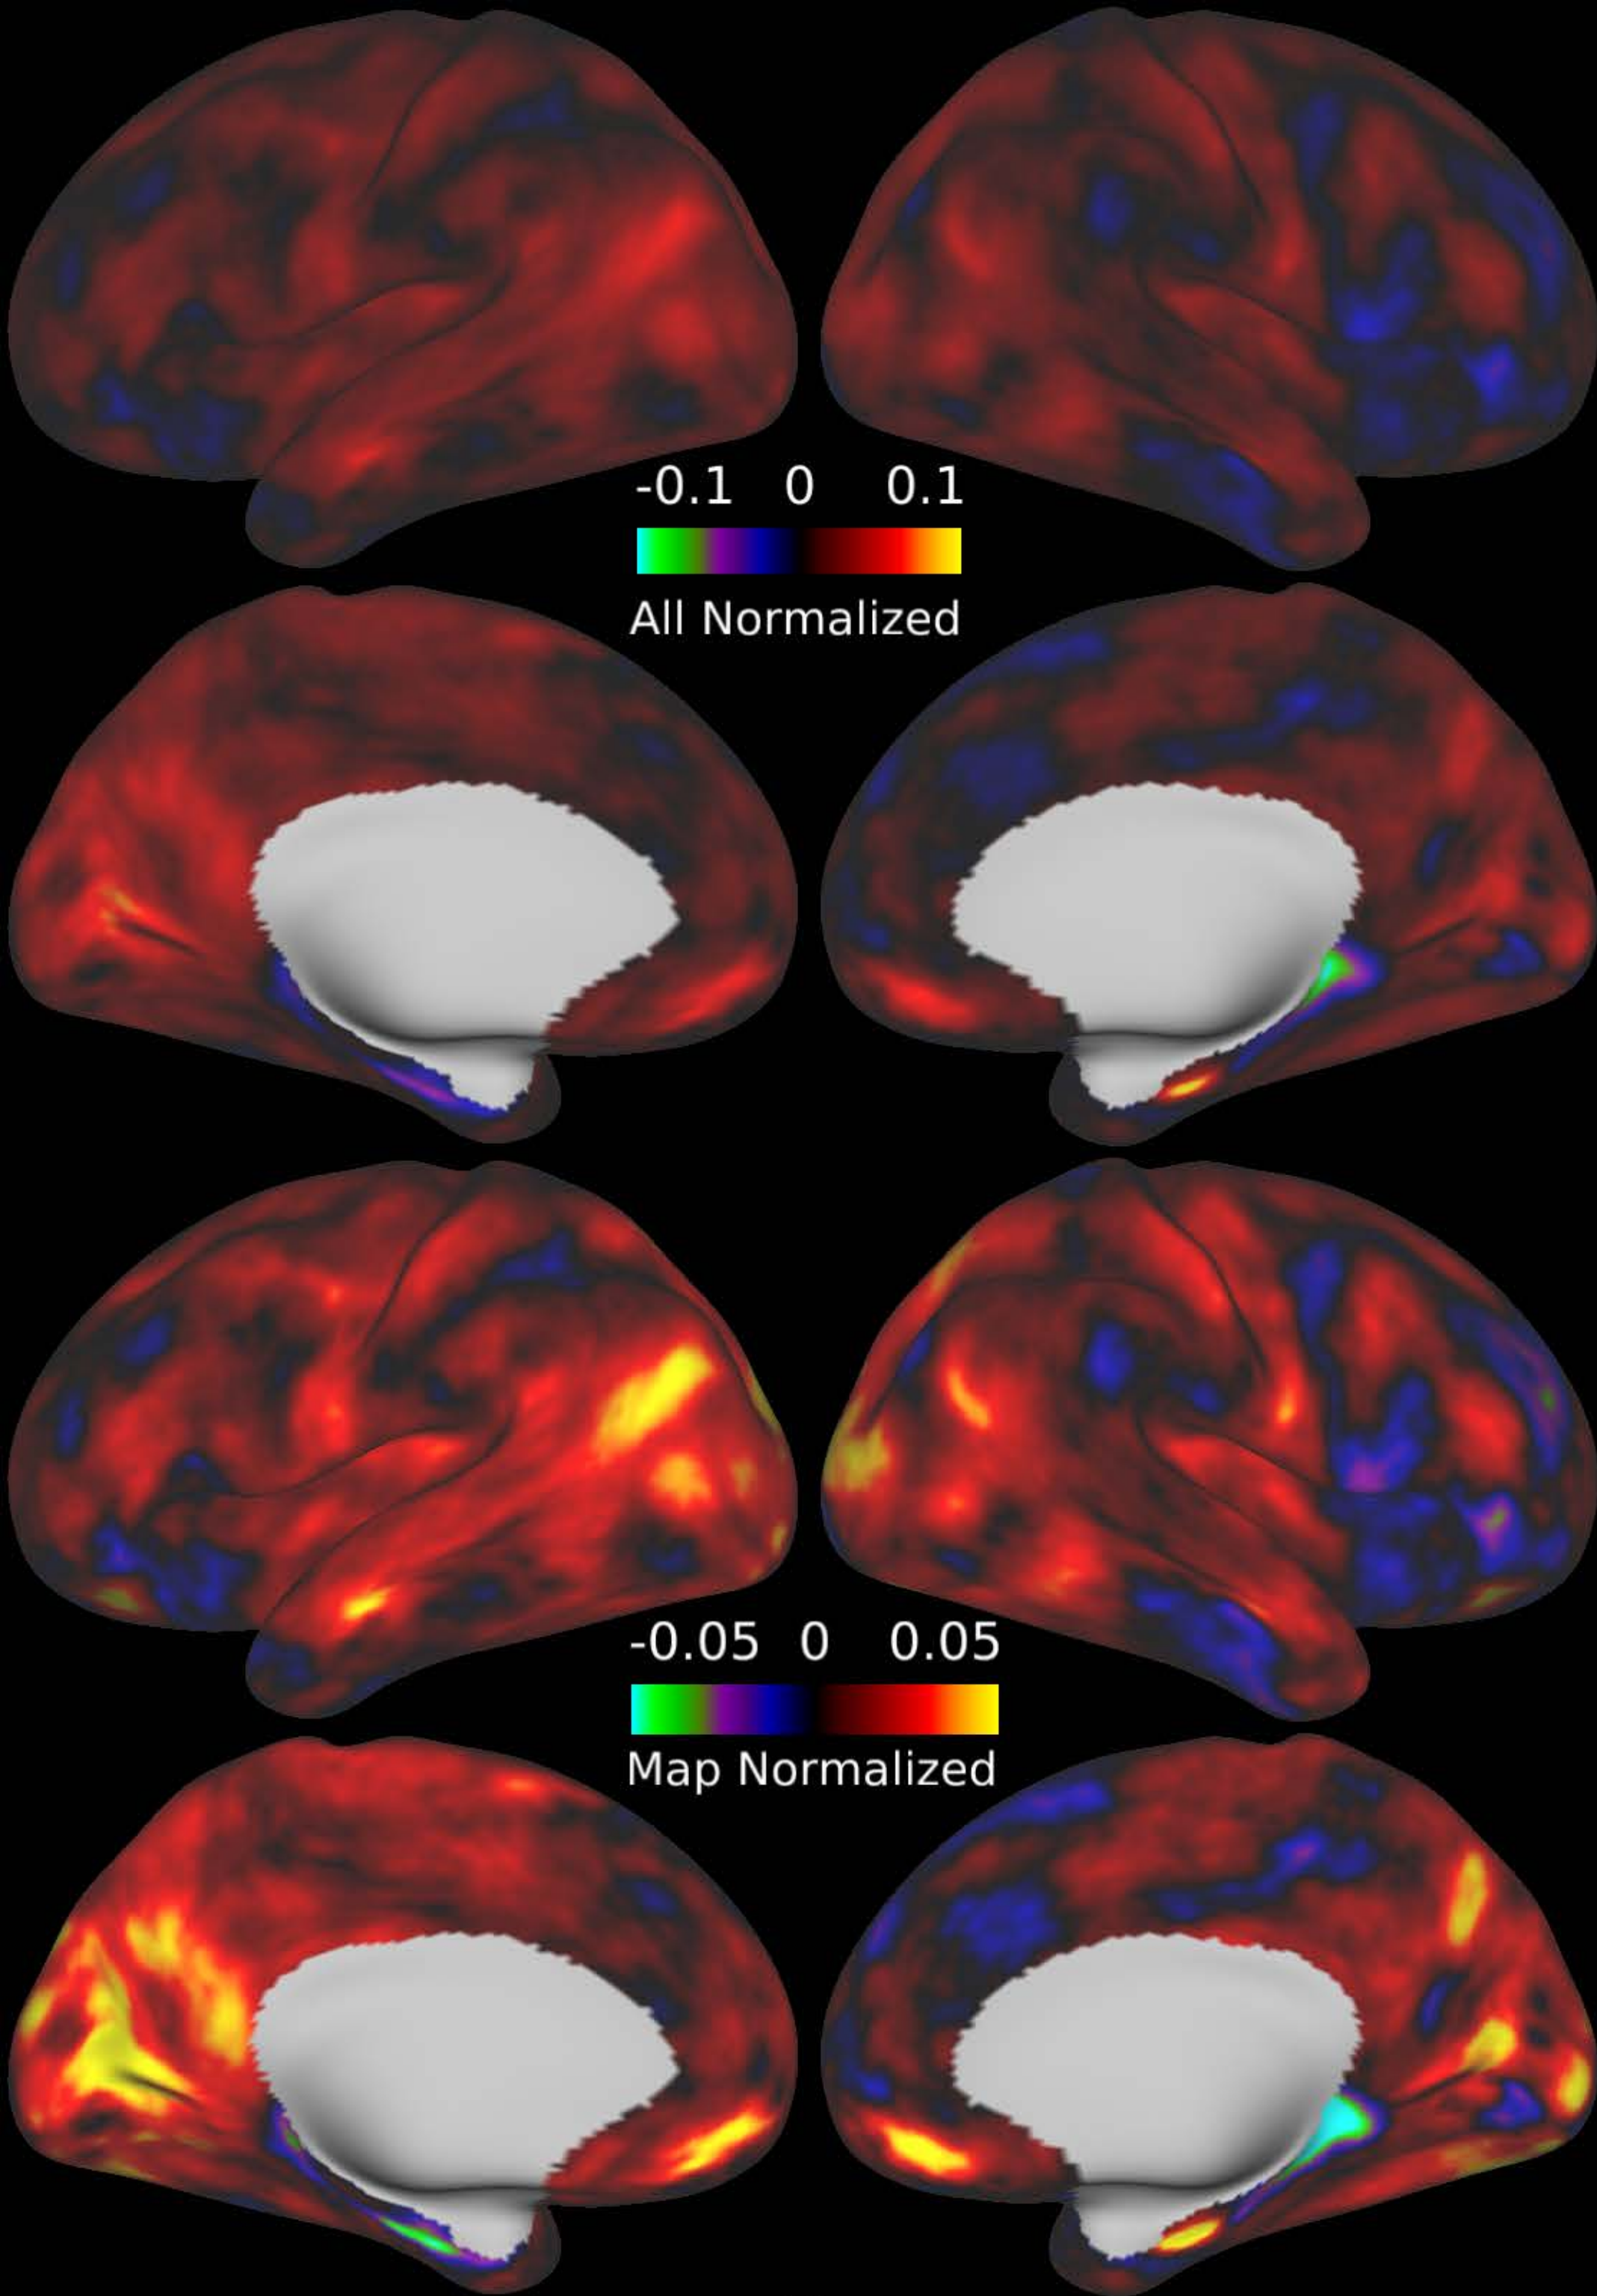

Hertz

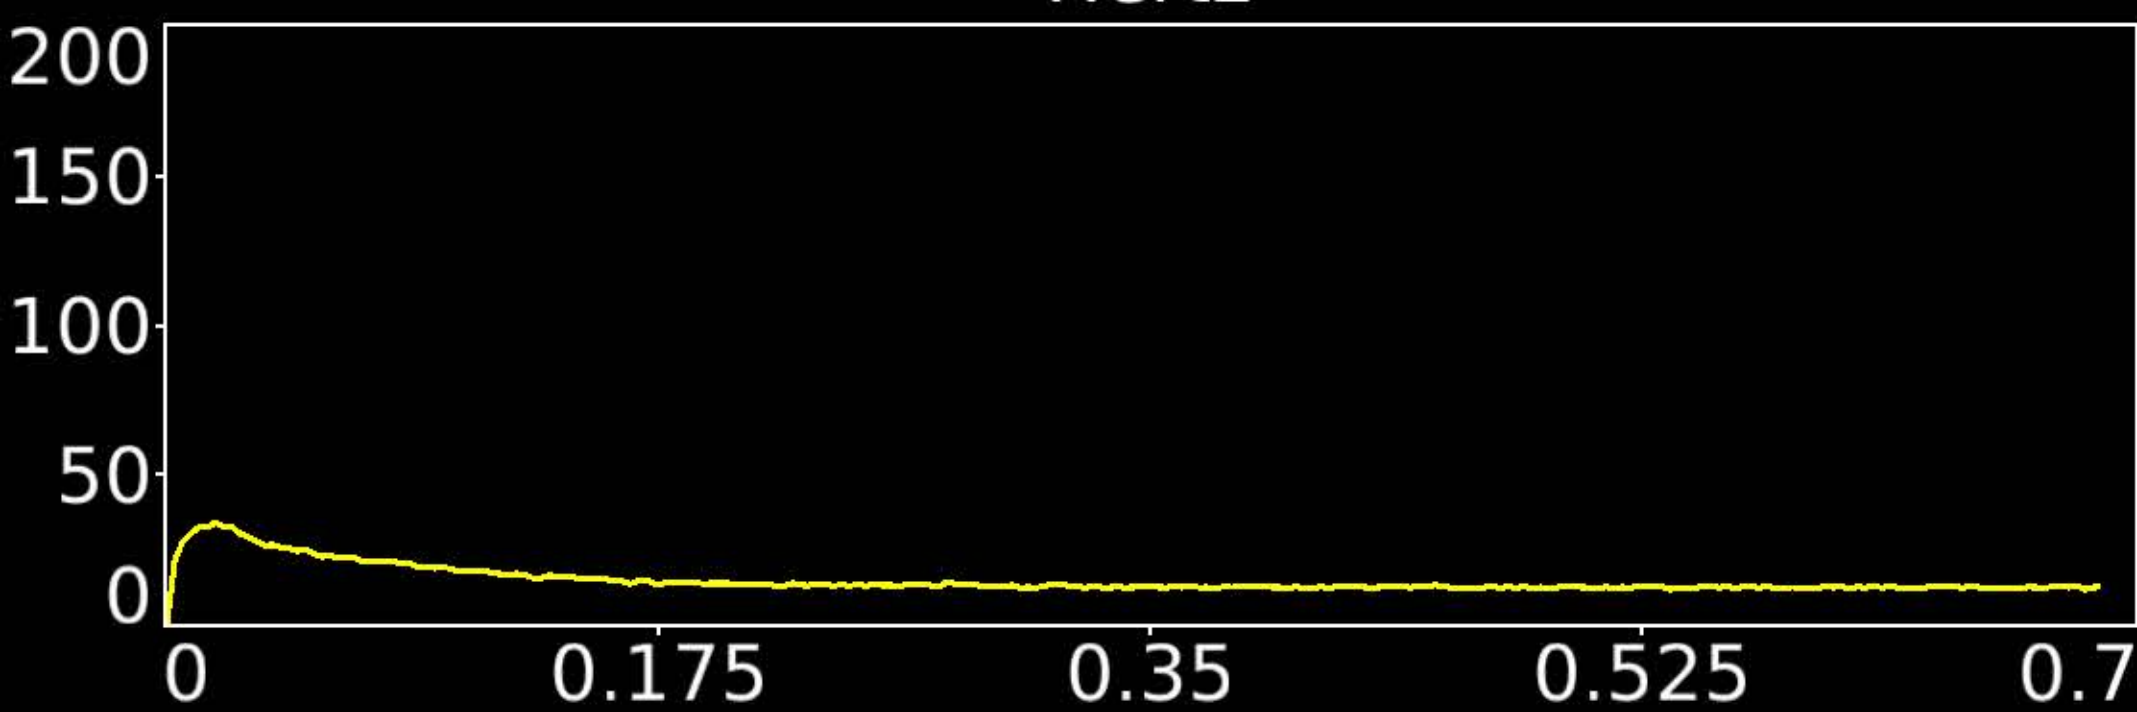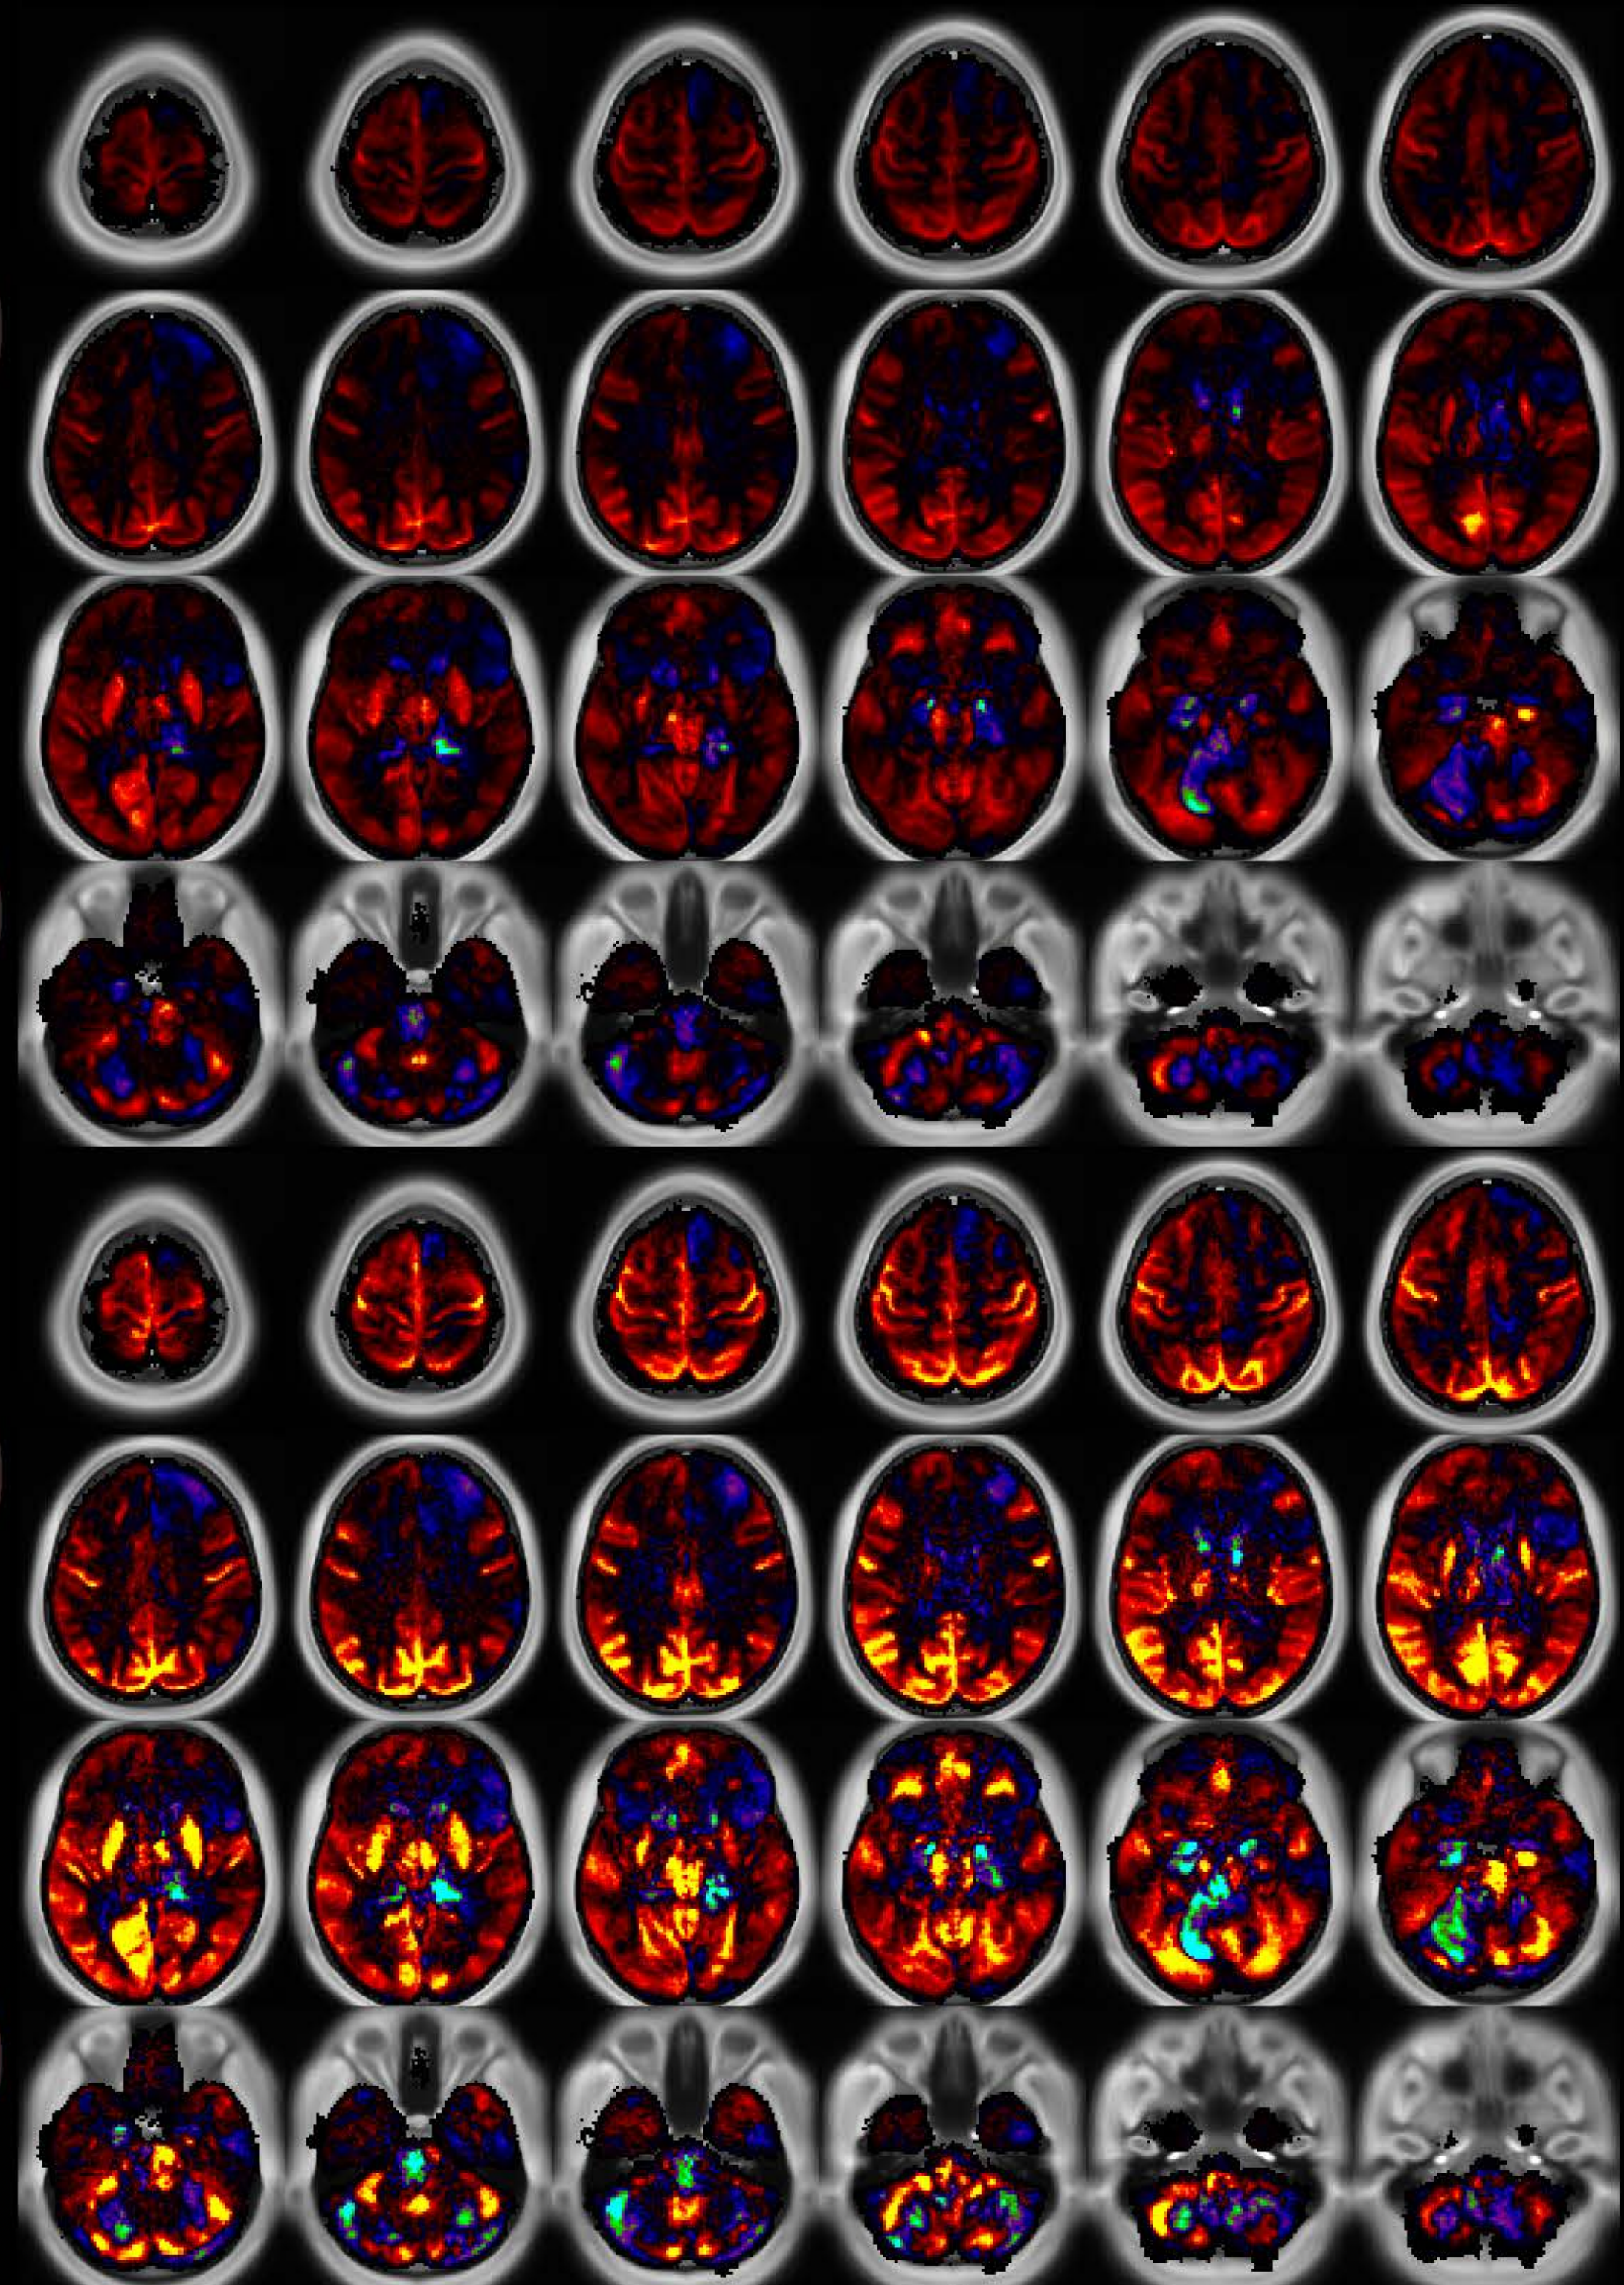

Seconds

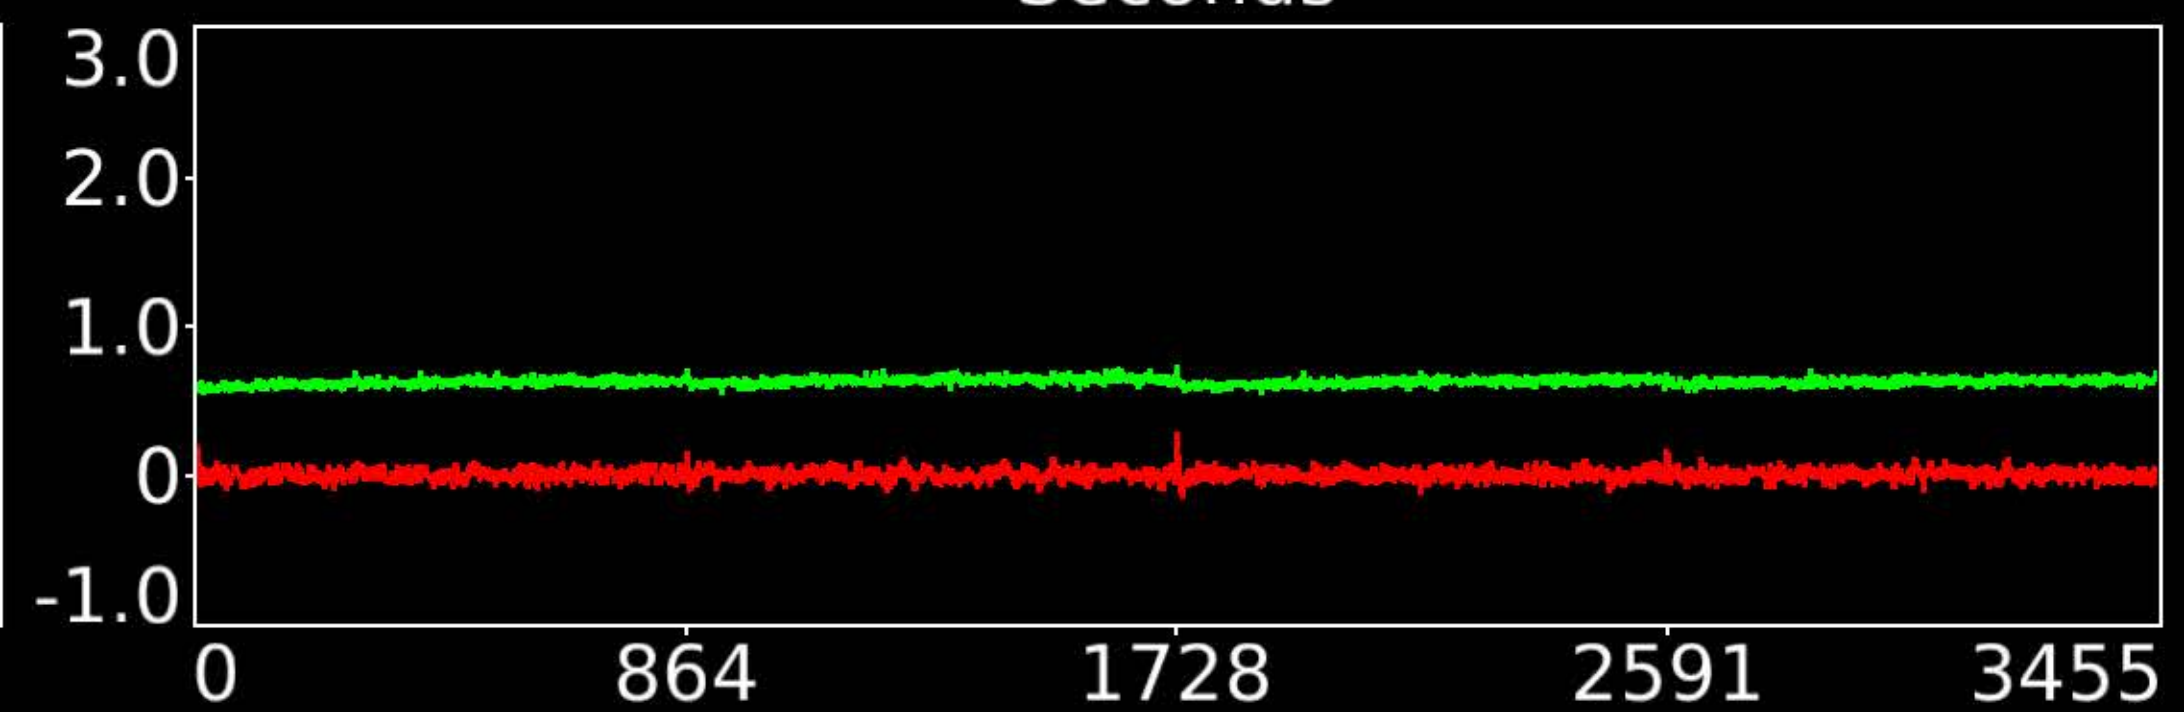

|                                                                                |                           |                                                            |  |
|--------------------------------------------------------------------------------|---------------------------|------------------------------------------------------------|--|
| Number & Class: 52 Noise                                                       |                           | Name: Subsidiary Global Physiological Noise Single Subject |  |
| RVT Correlated: No                                                             | DVARS Dip Associated: No  | Cross-Subject Variable: No                                 |  |
| Single Subject: Yes                                                            | % Variance Explained: 0.6 | Globality Index: 1.51                                      |  |
| Task Component: No                                                             | Taskr Component: No       | Sleep Noted: No                                            |  |
| Rationale: Single subject component with high correlation to global timecourse |                           |                                                            |  |



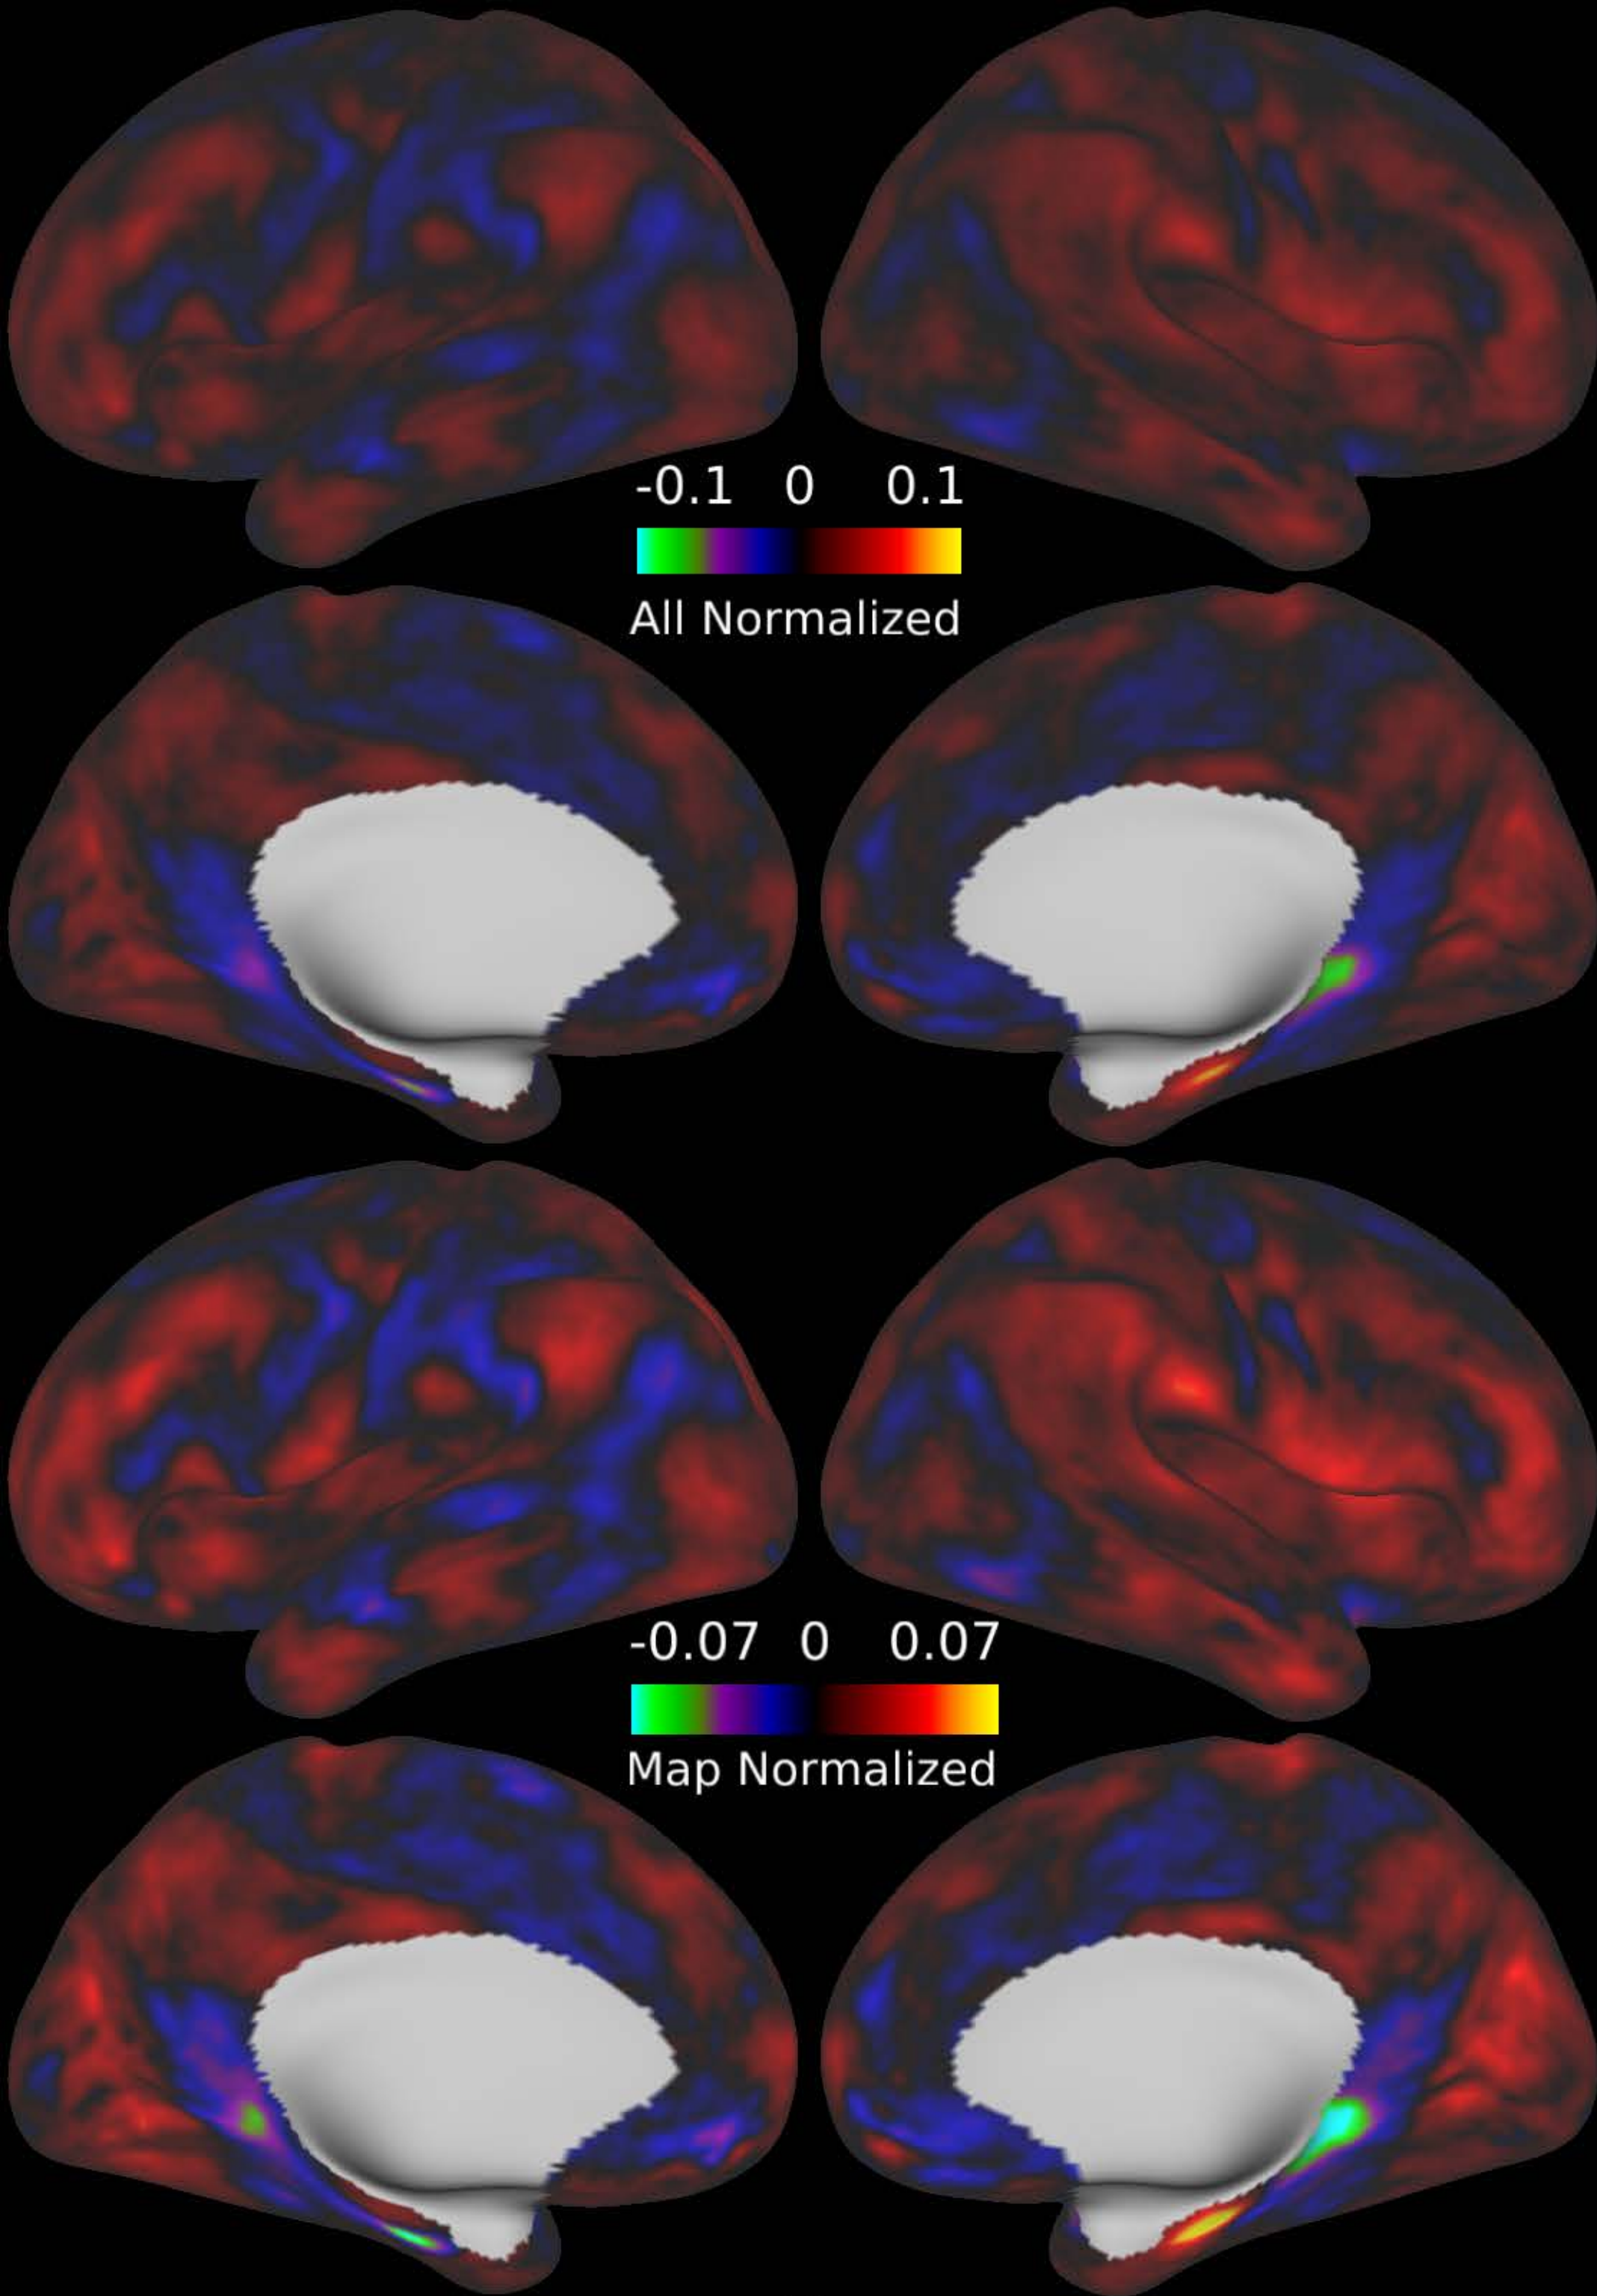

Hertz

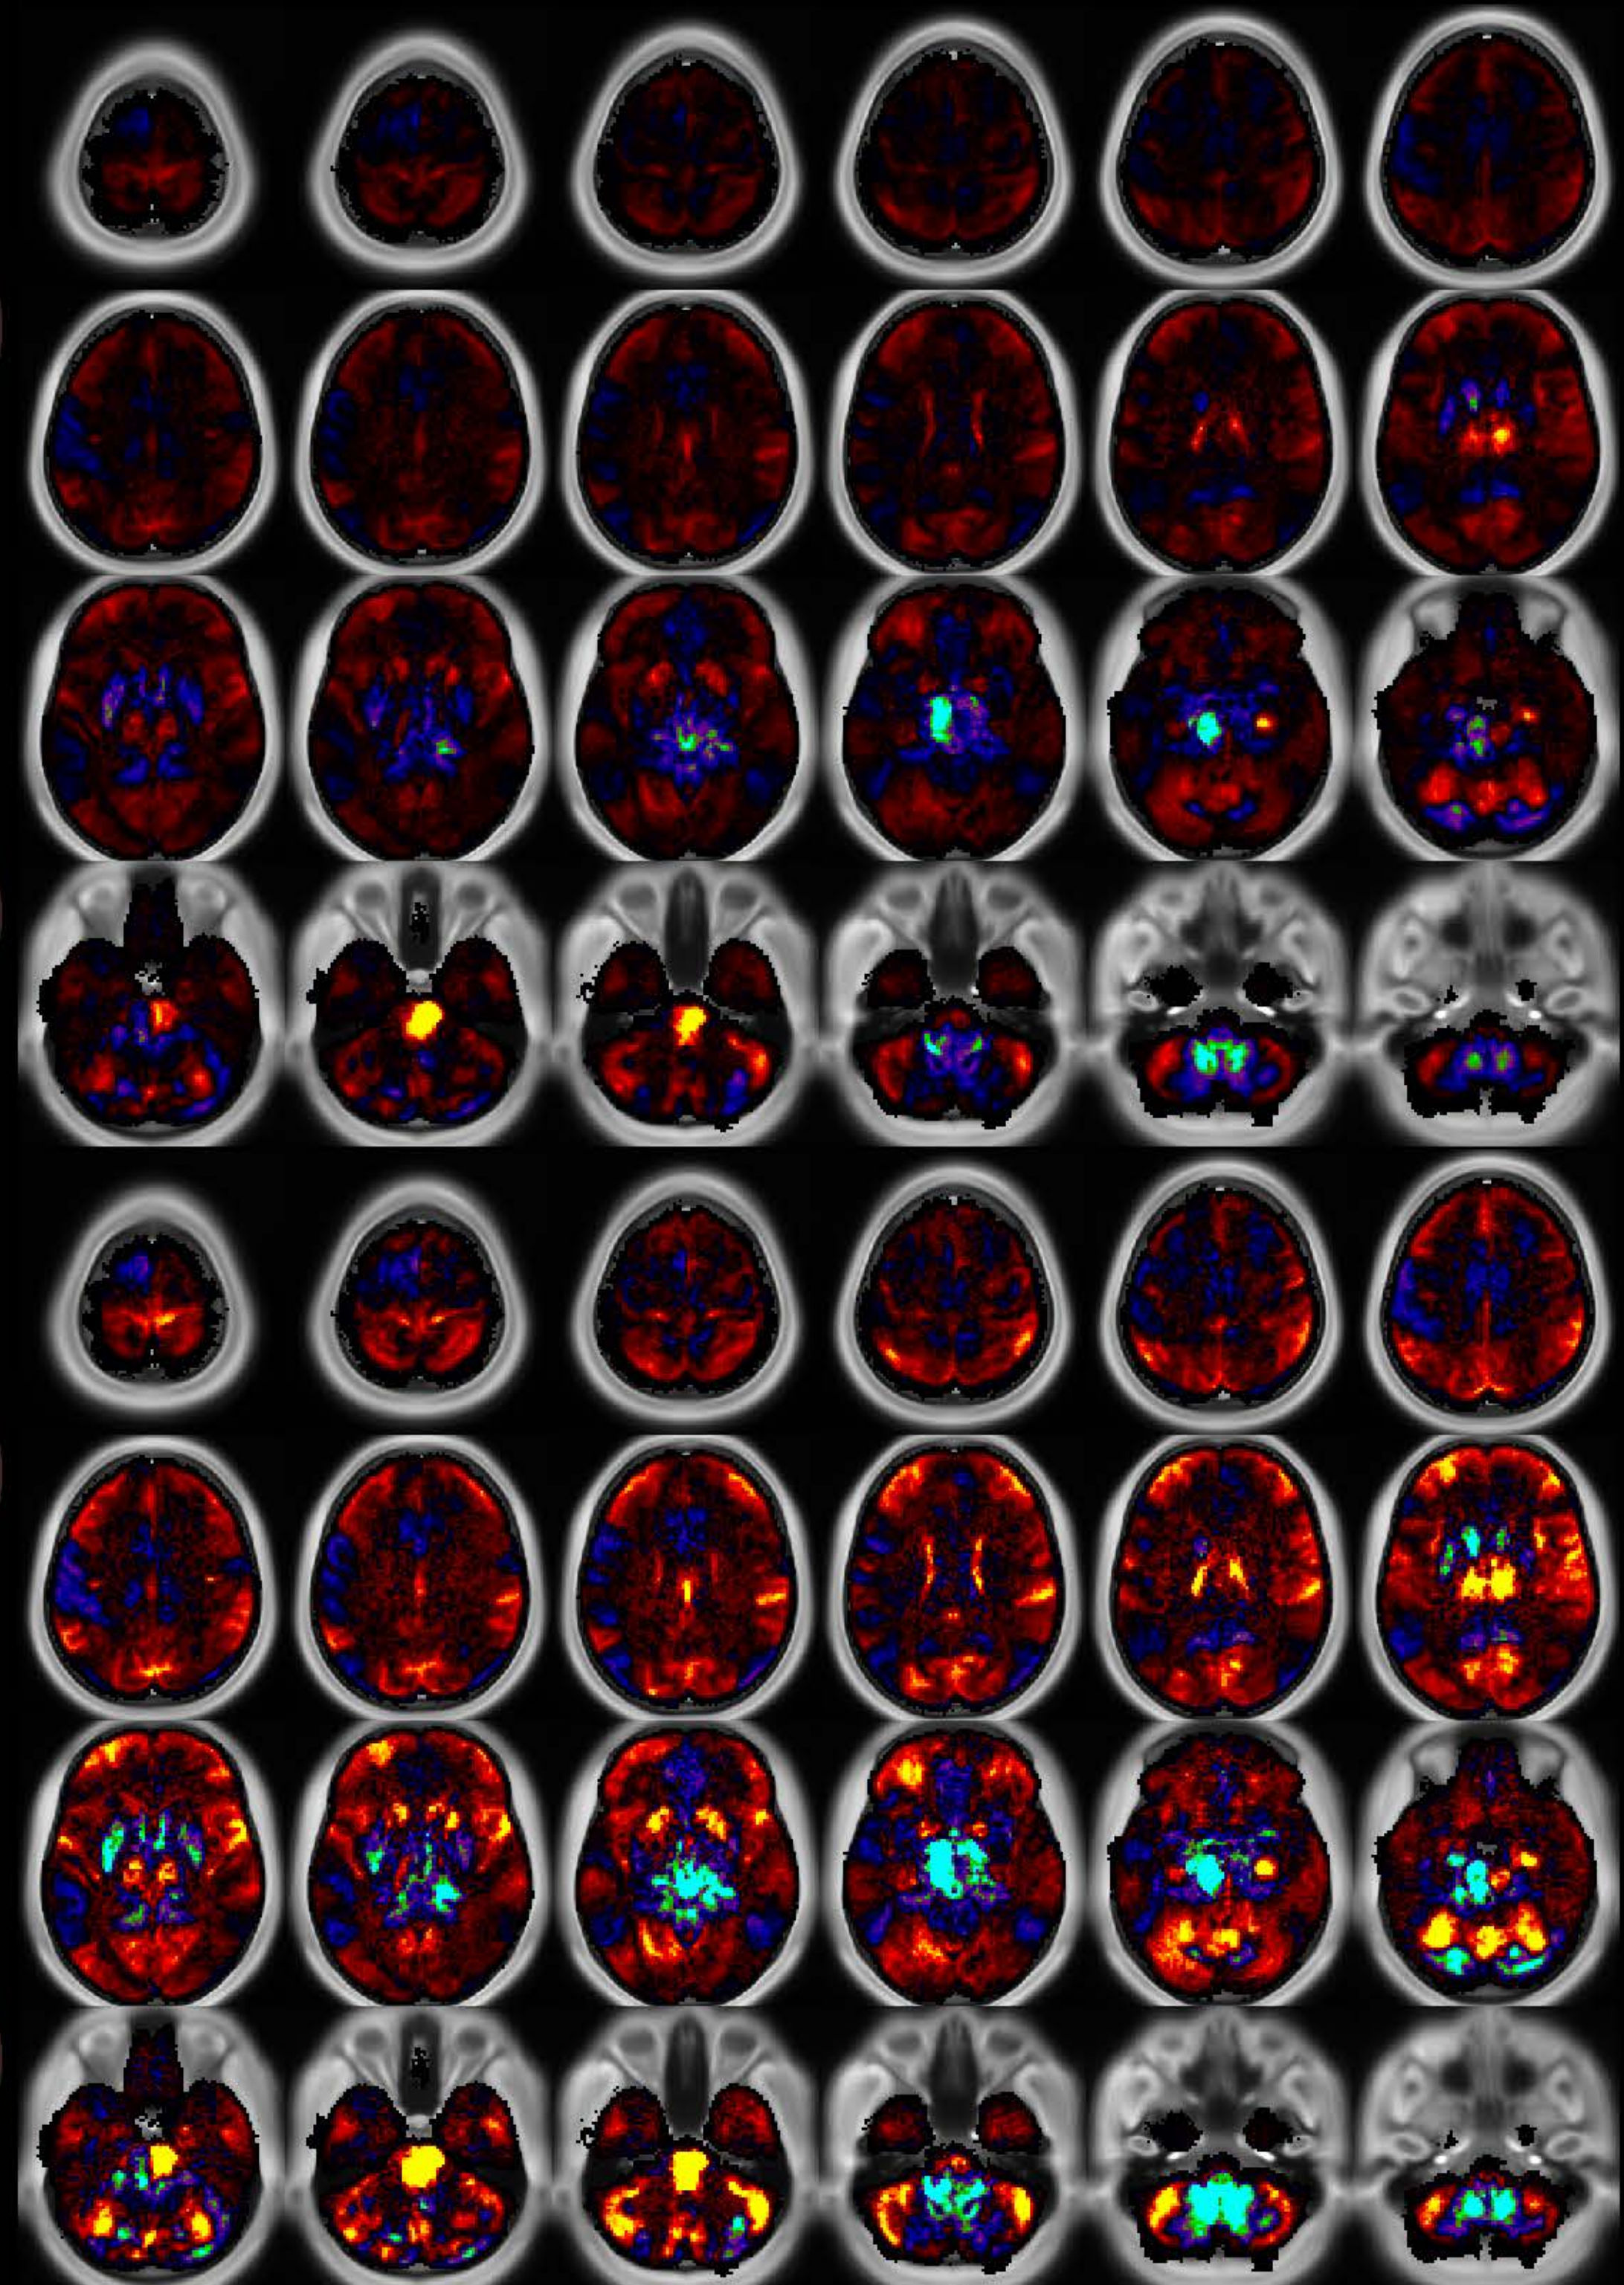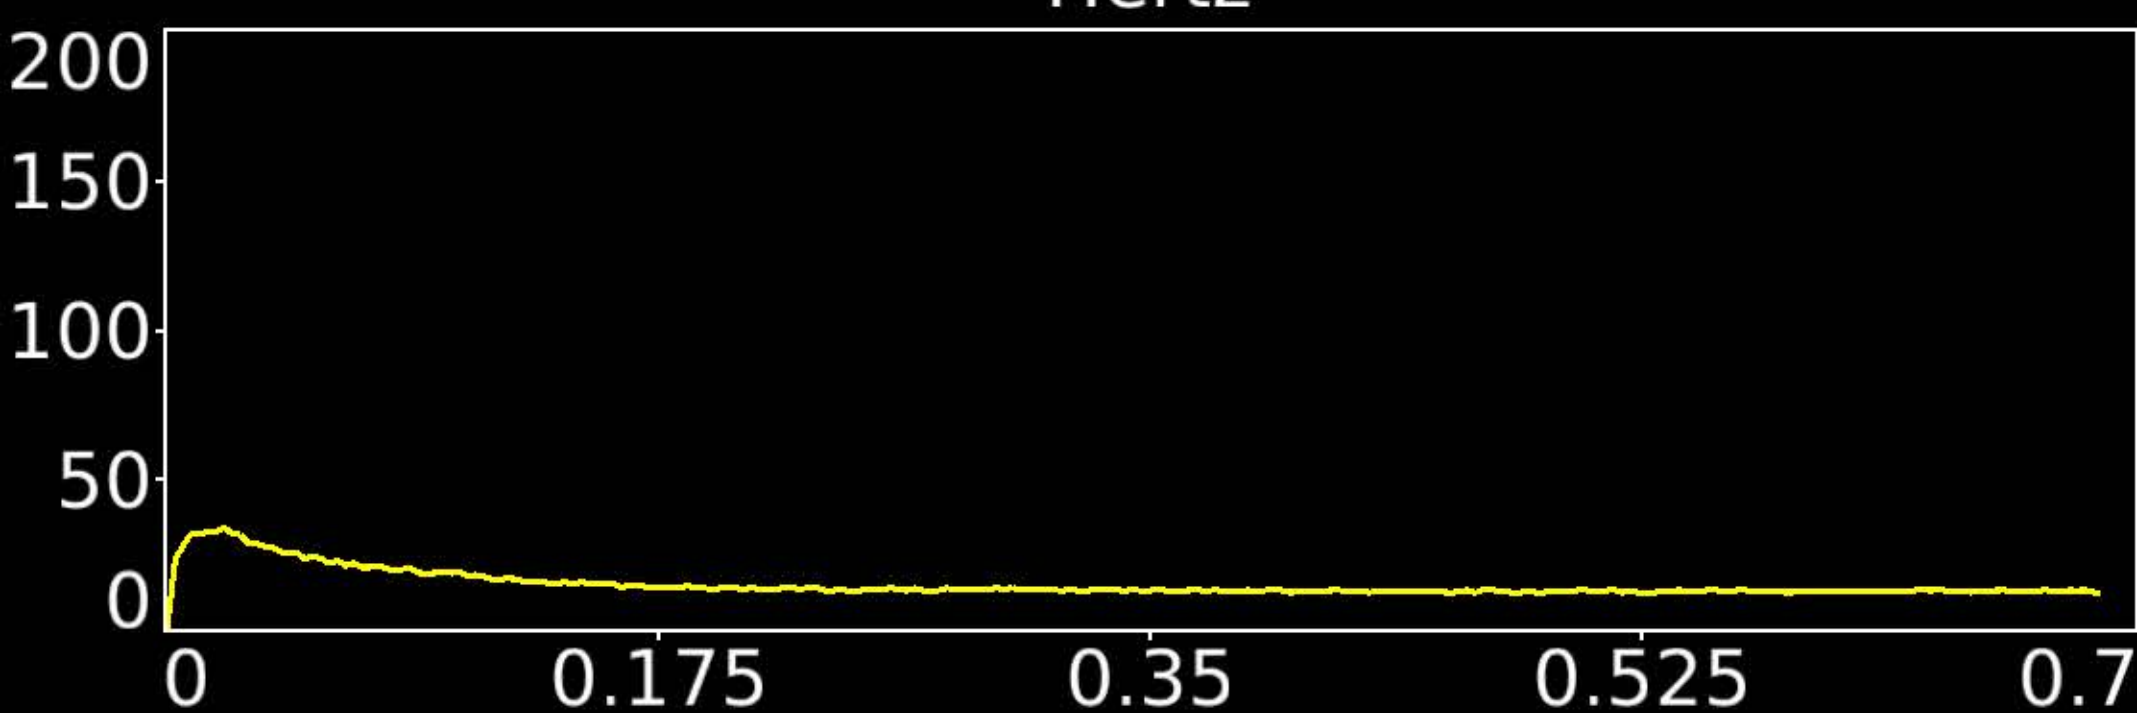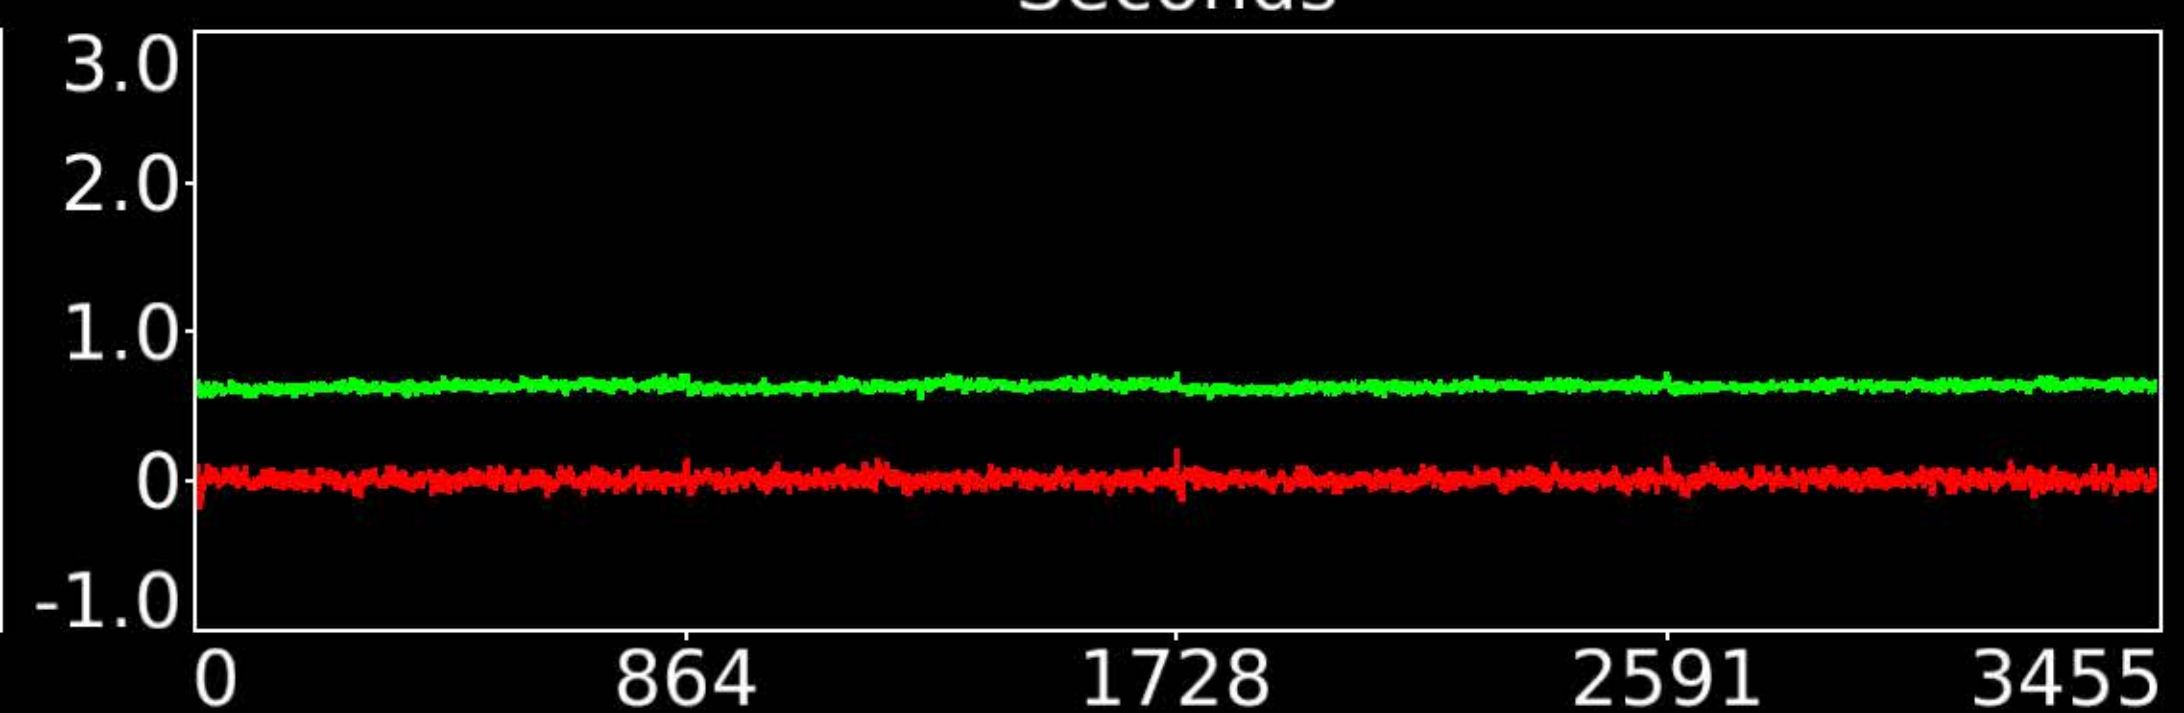

|                          |                           |                                     |  |
|--------------------------|---------------------------|-------------------------------------|--|
| Number & Class: 53 Noise |                           | Name: Recon Artifact Single Subject |  |
| RVT Correlated: No       | DVARS Dip Associated: No  | Cross-Subject Variable: No          |  |
| Single Subject: Yes      | % Variance Explained: 0.6 | Globality Index: 0.85               |  |
| Task Component: No       | Taskr Component: No       | Sleep Noted: No                     |  |

Rationale: Single subject component with obvious banding in sagittal plane suggestive of multi-band recon artifact along slice direction



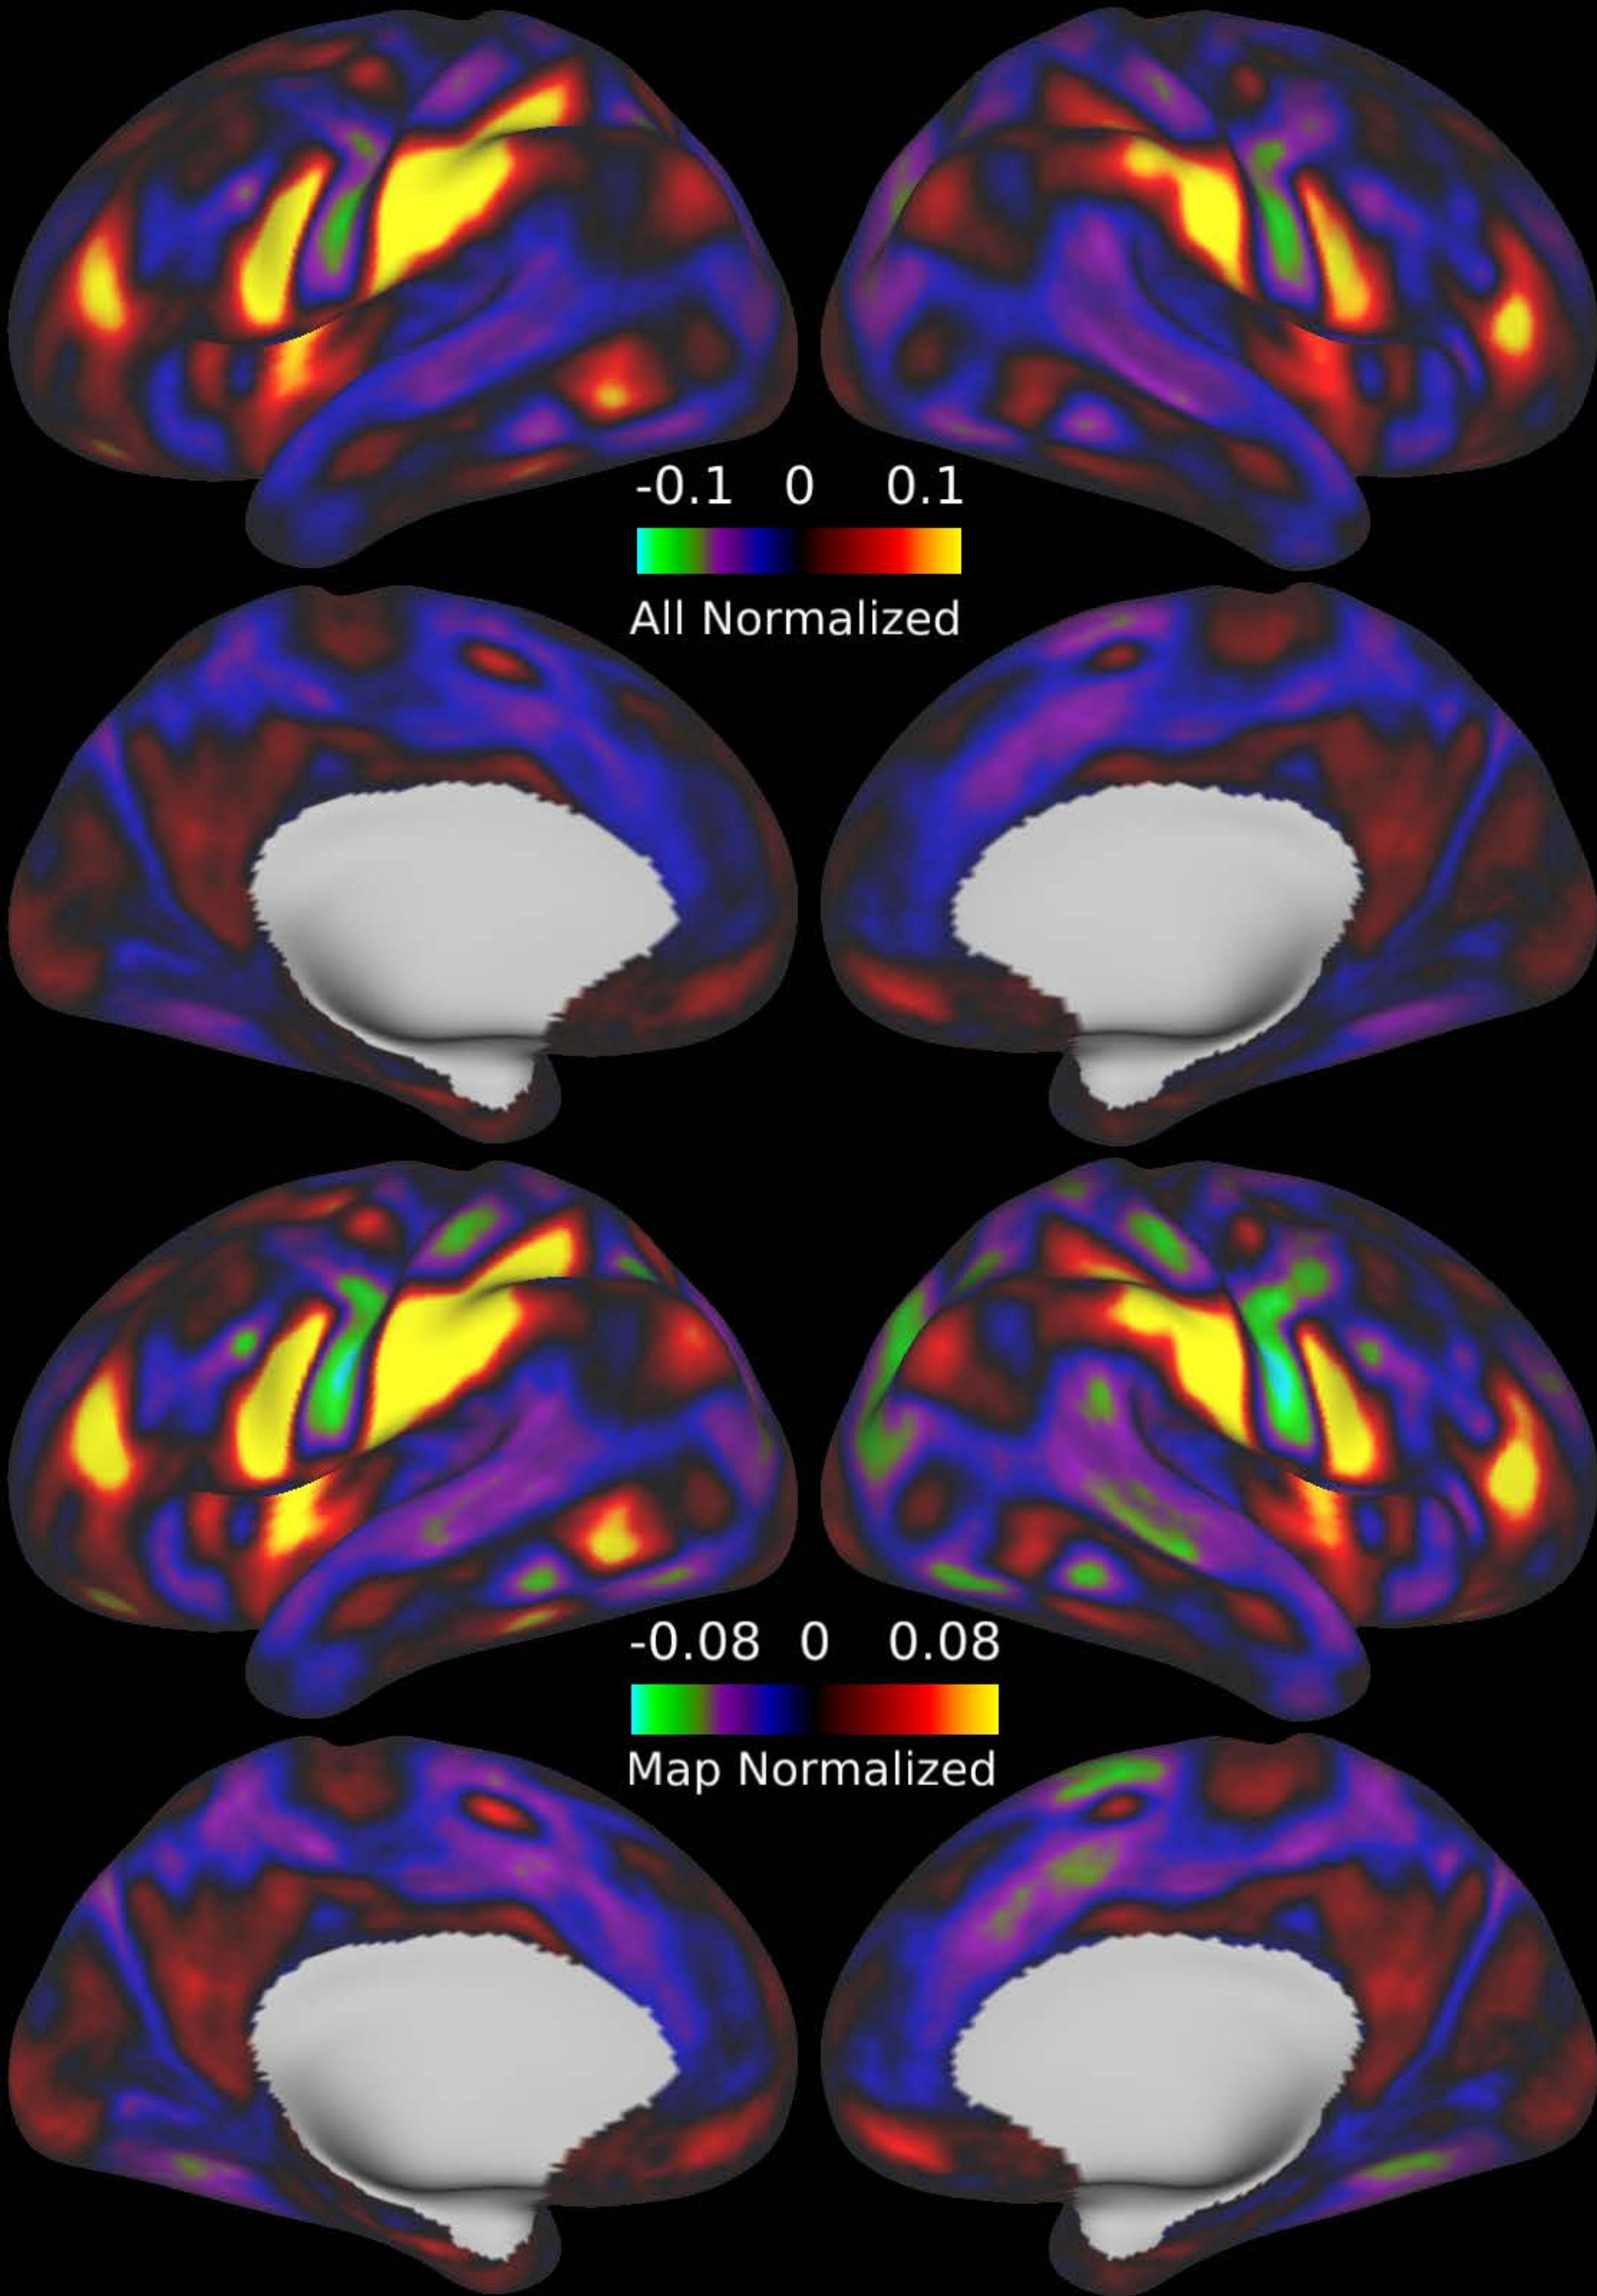

Hertz

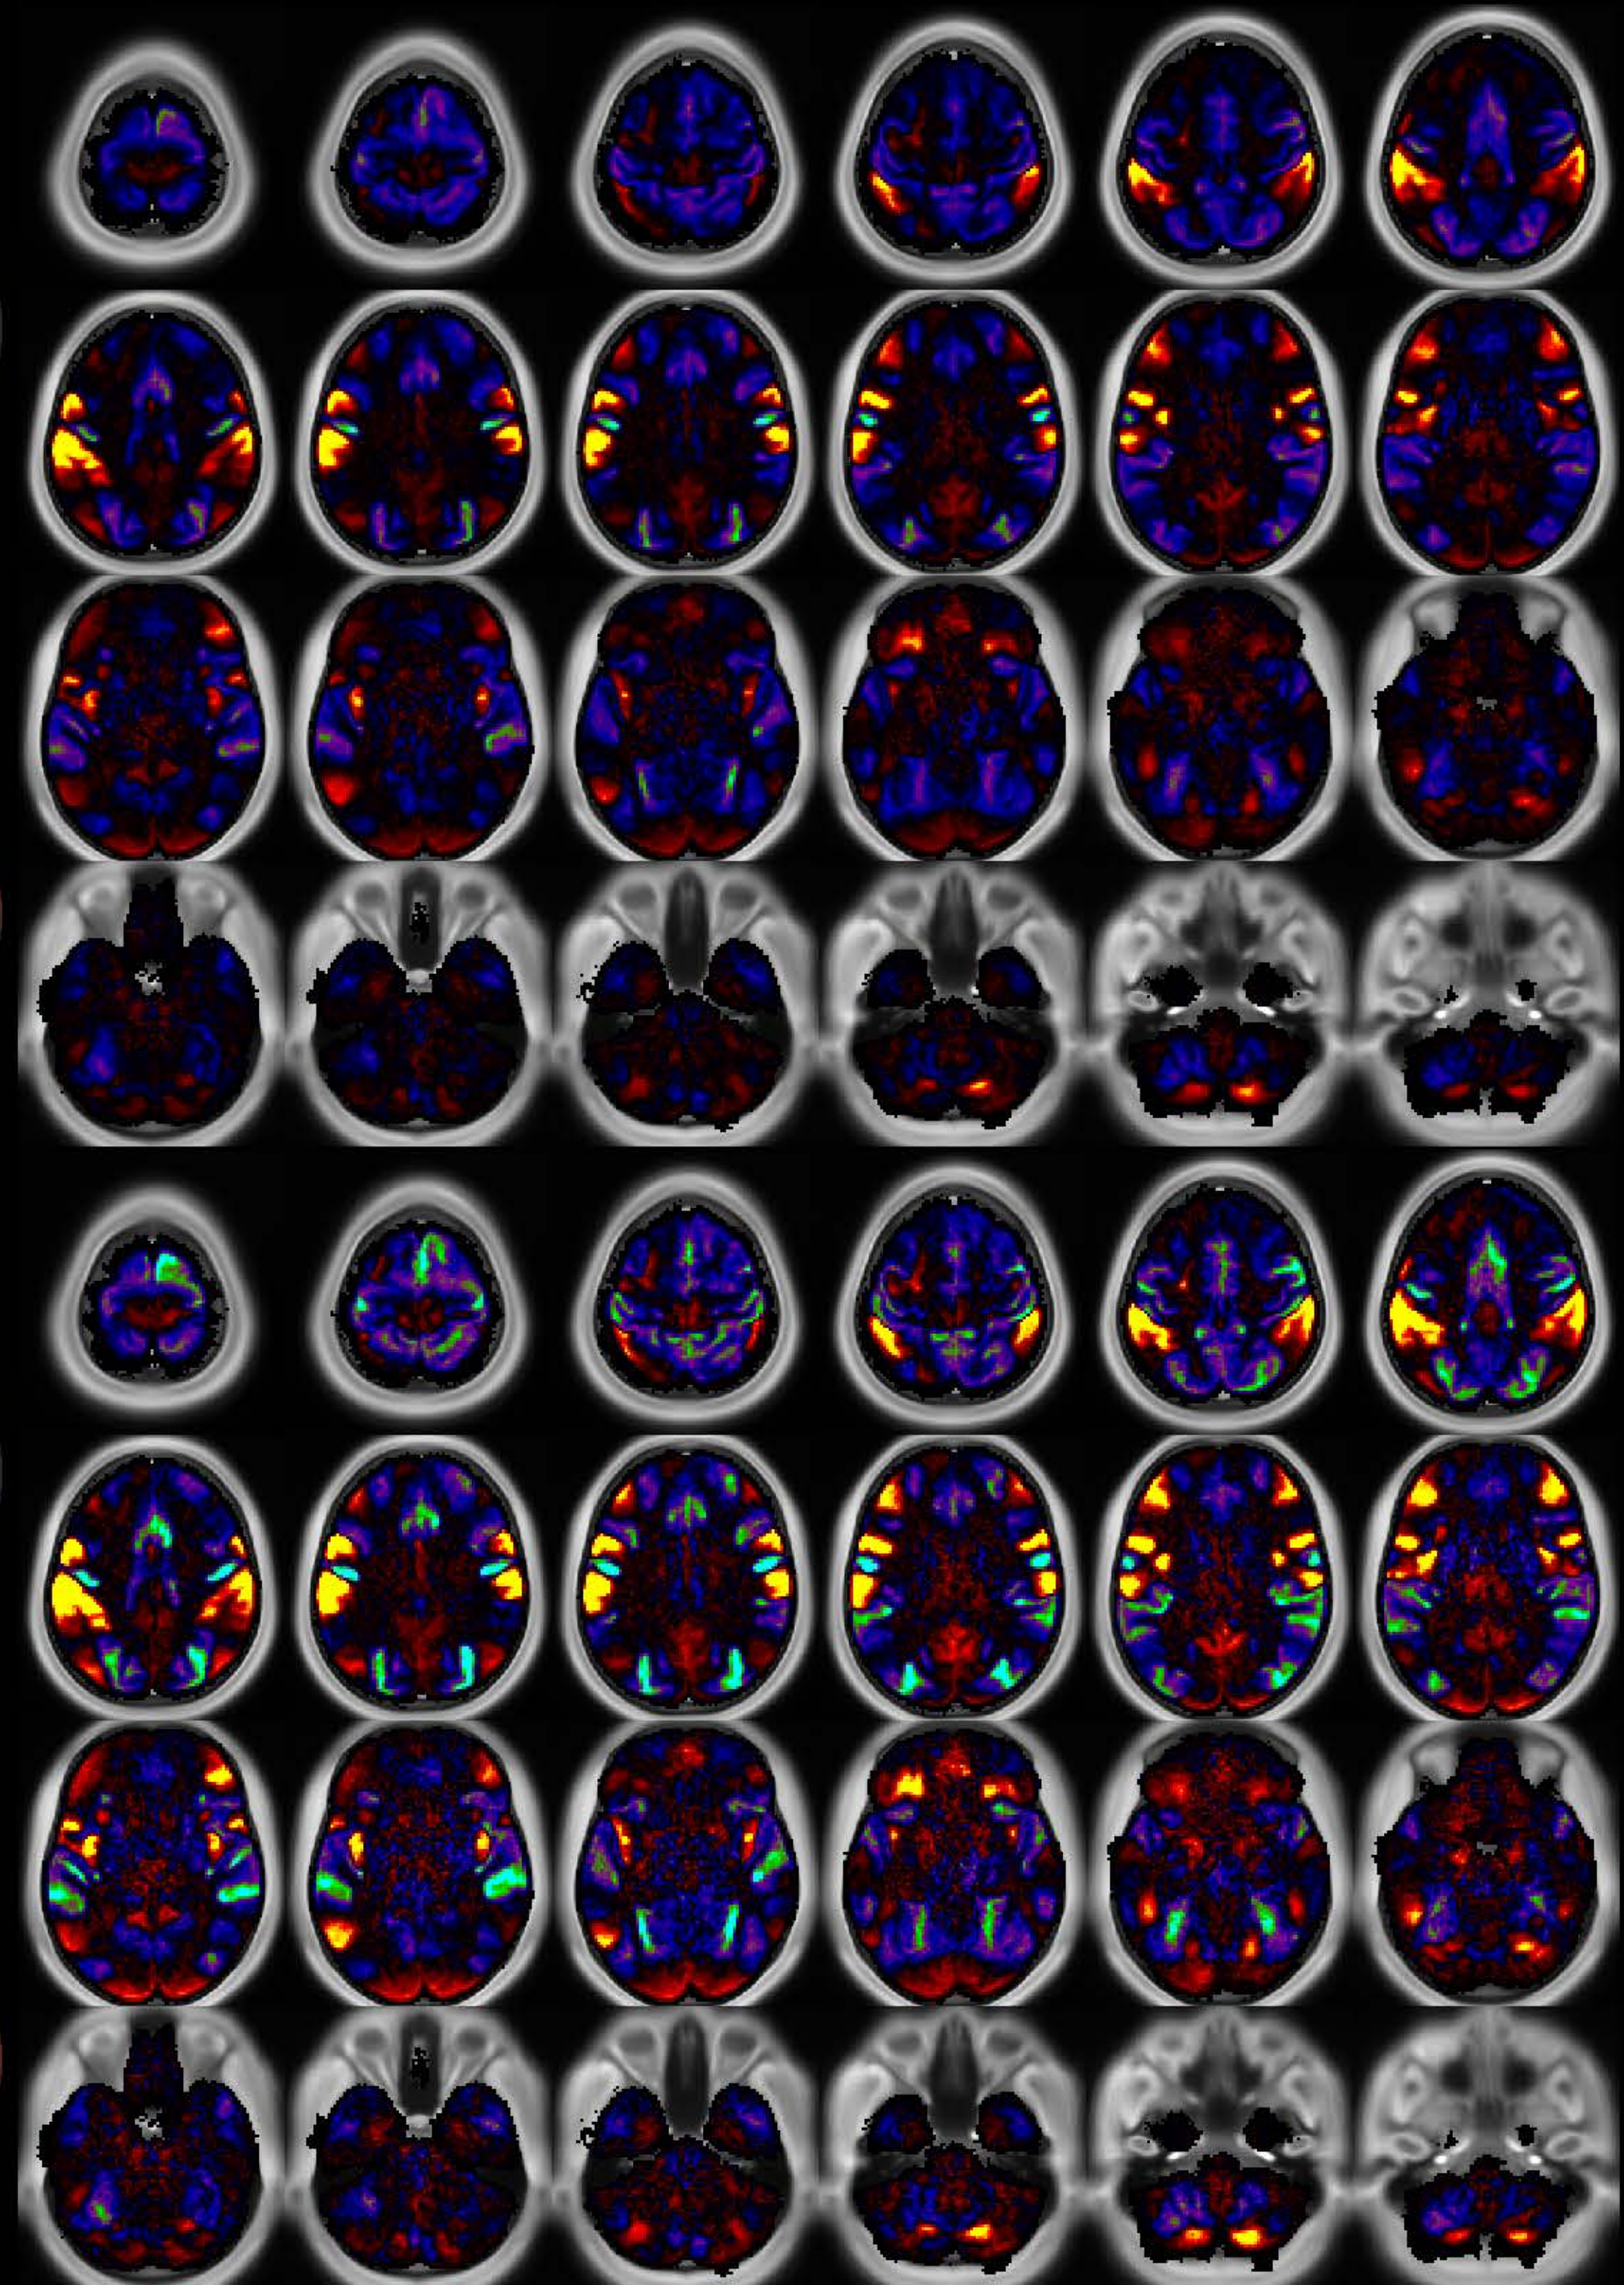

Seconds

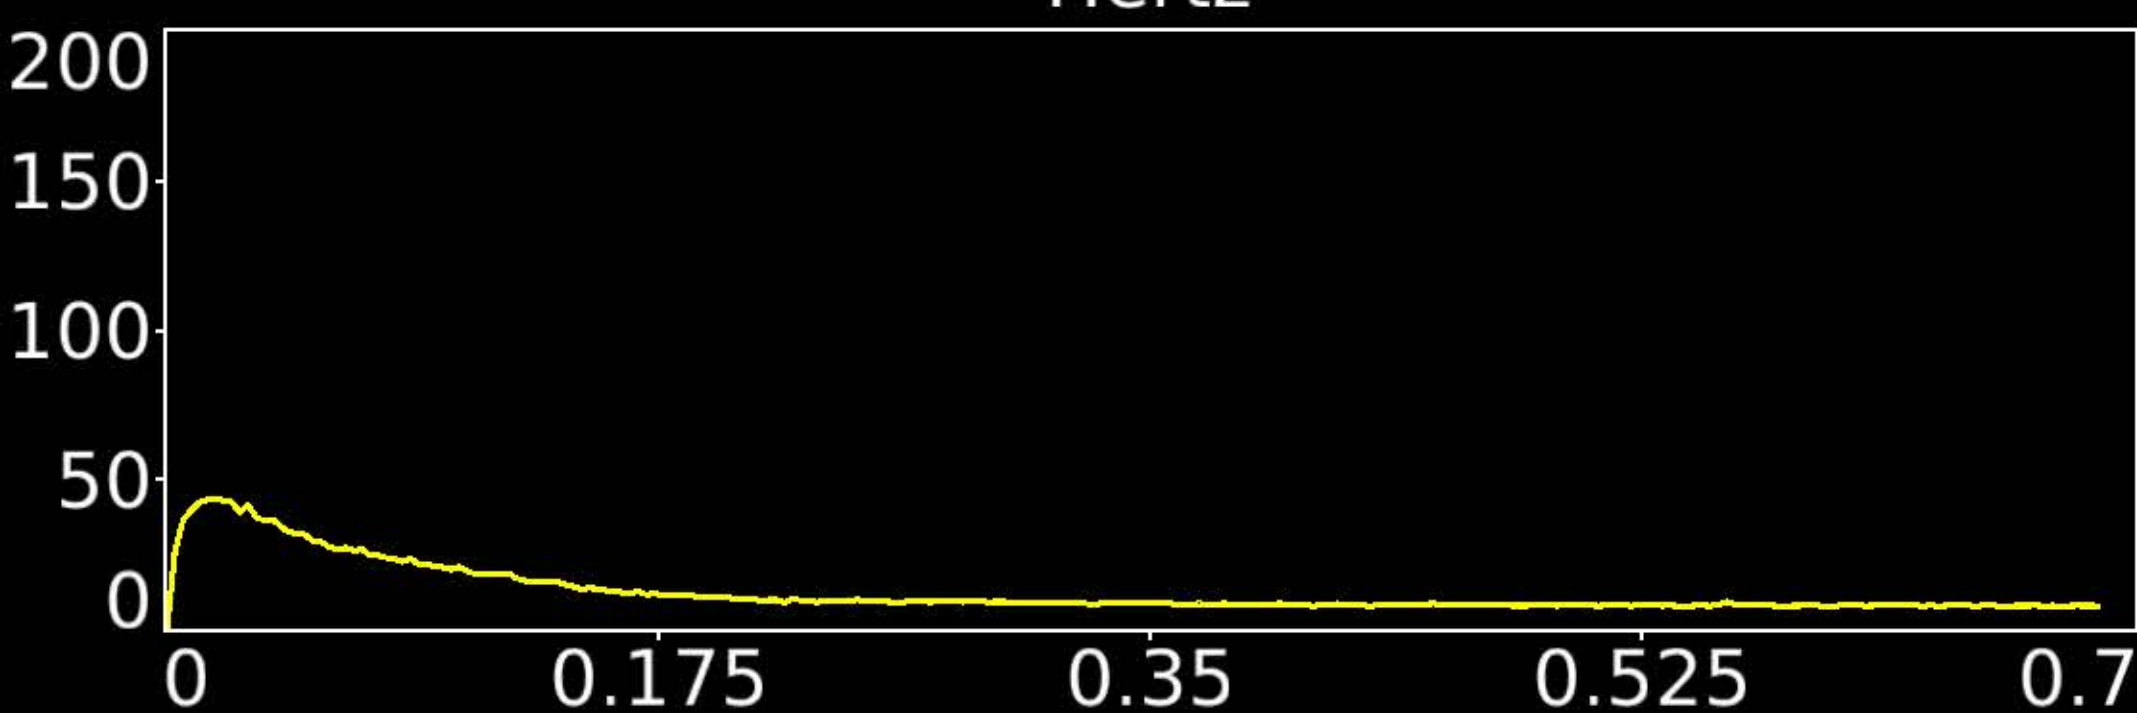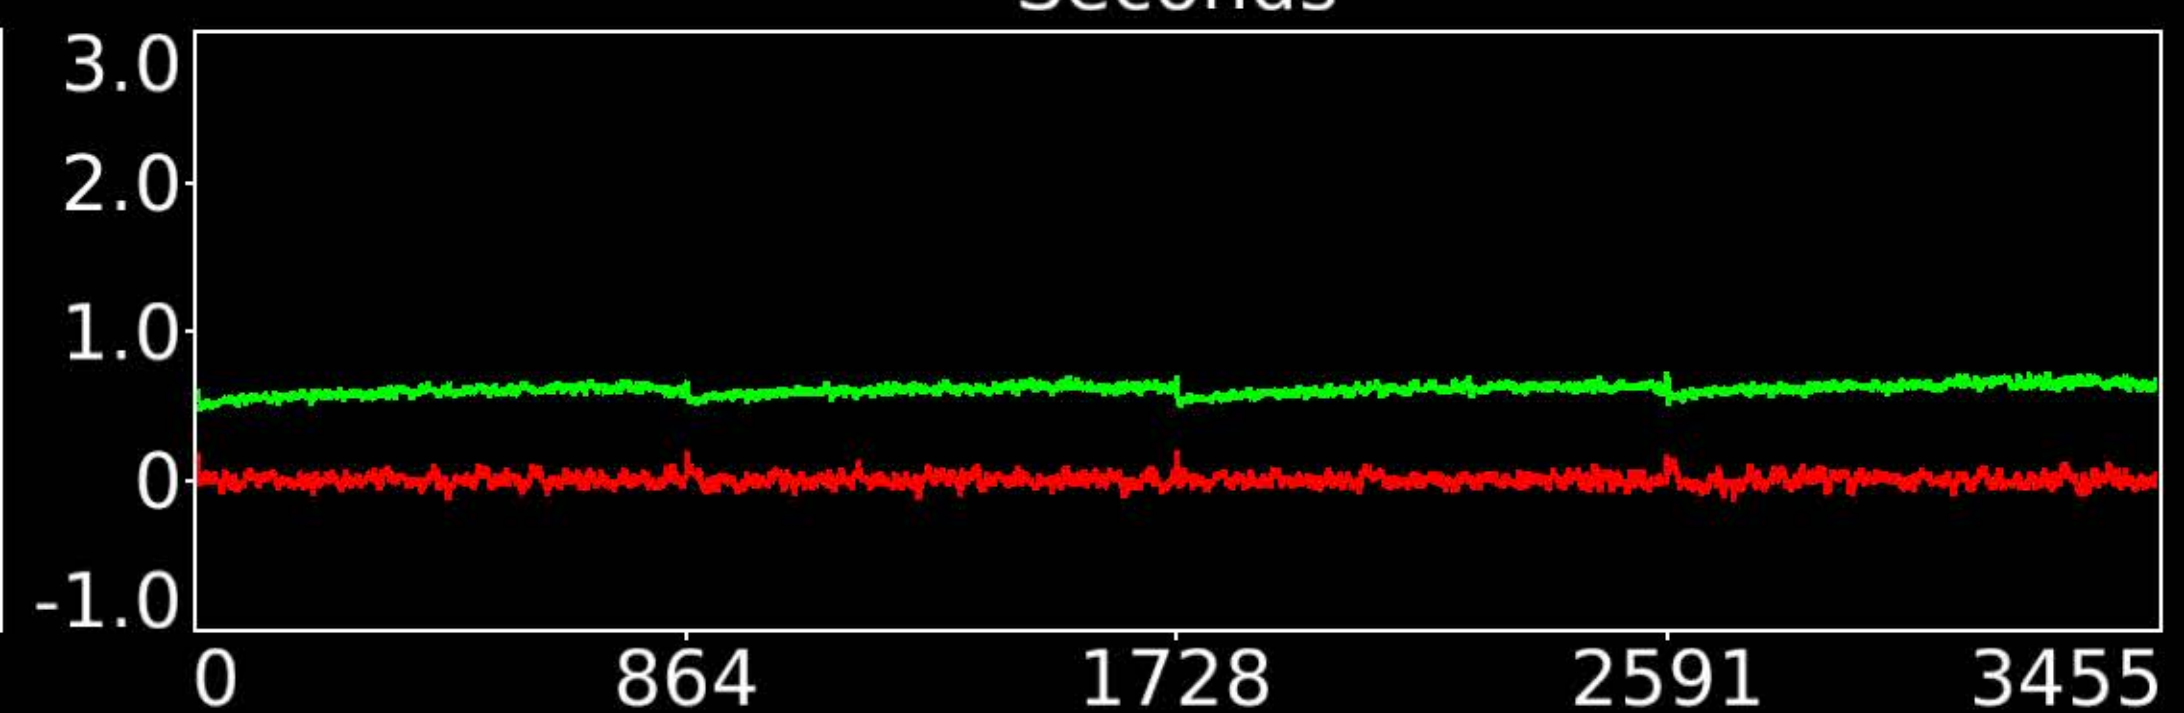

|                           |                            |                                     |  |
|---------------------------|----------------------------|-------------------------------------|--|
| Number & Class: 54 Signal |                            | Name: Motor and Sensory Association |  |
| RVT Correlated: No        | DVARS Dip Associated: No   | Cross-Subject Variable: No          |  |
| Single Subject: No        | % Variance Explained: 0.58 | Globality Index: 0.48               |  |
| Task Component: No        | Taskr Component: 35        | Sleep Noted: No                     |  |

Rationale: Spatial map includes positive and negative patches that respect known areal boundaries (e.g. 4 and 1)



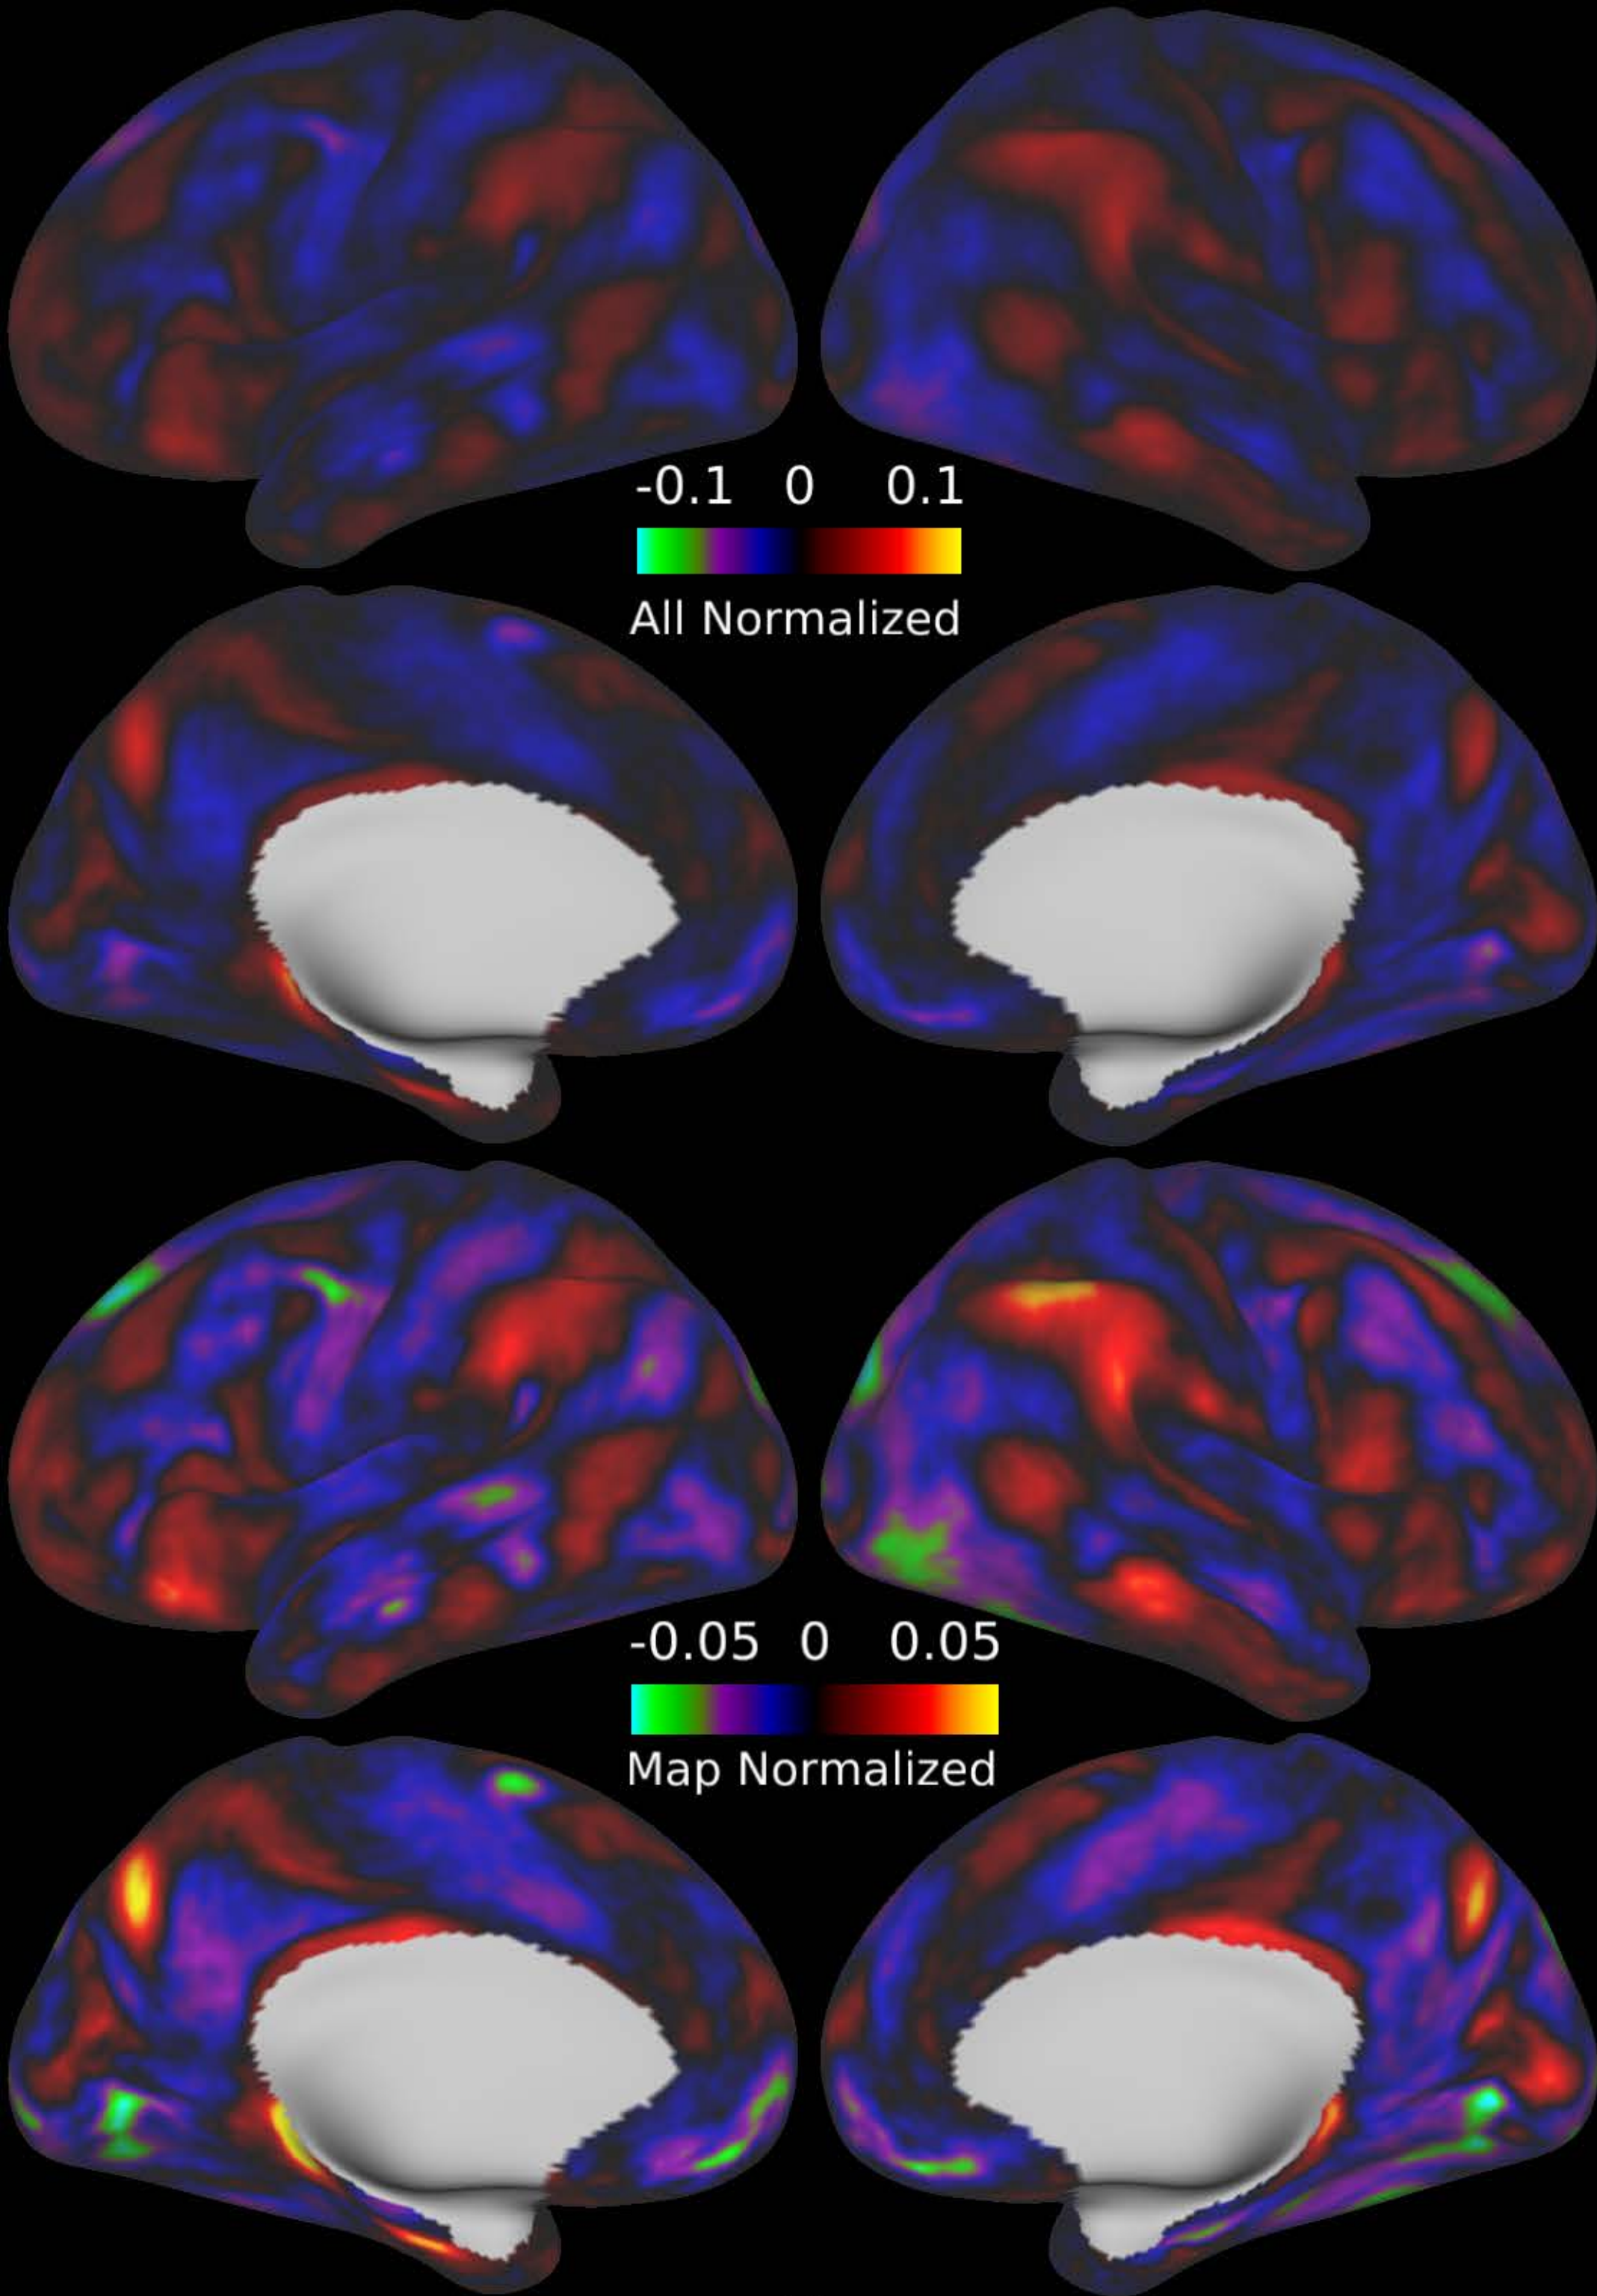

Hertz

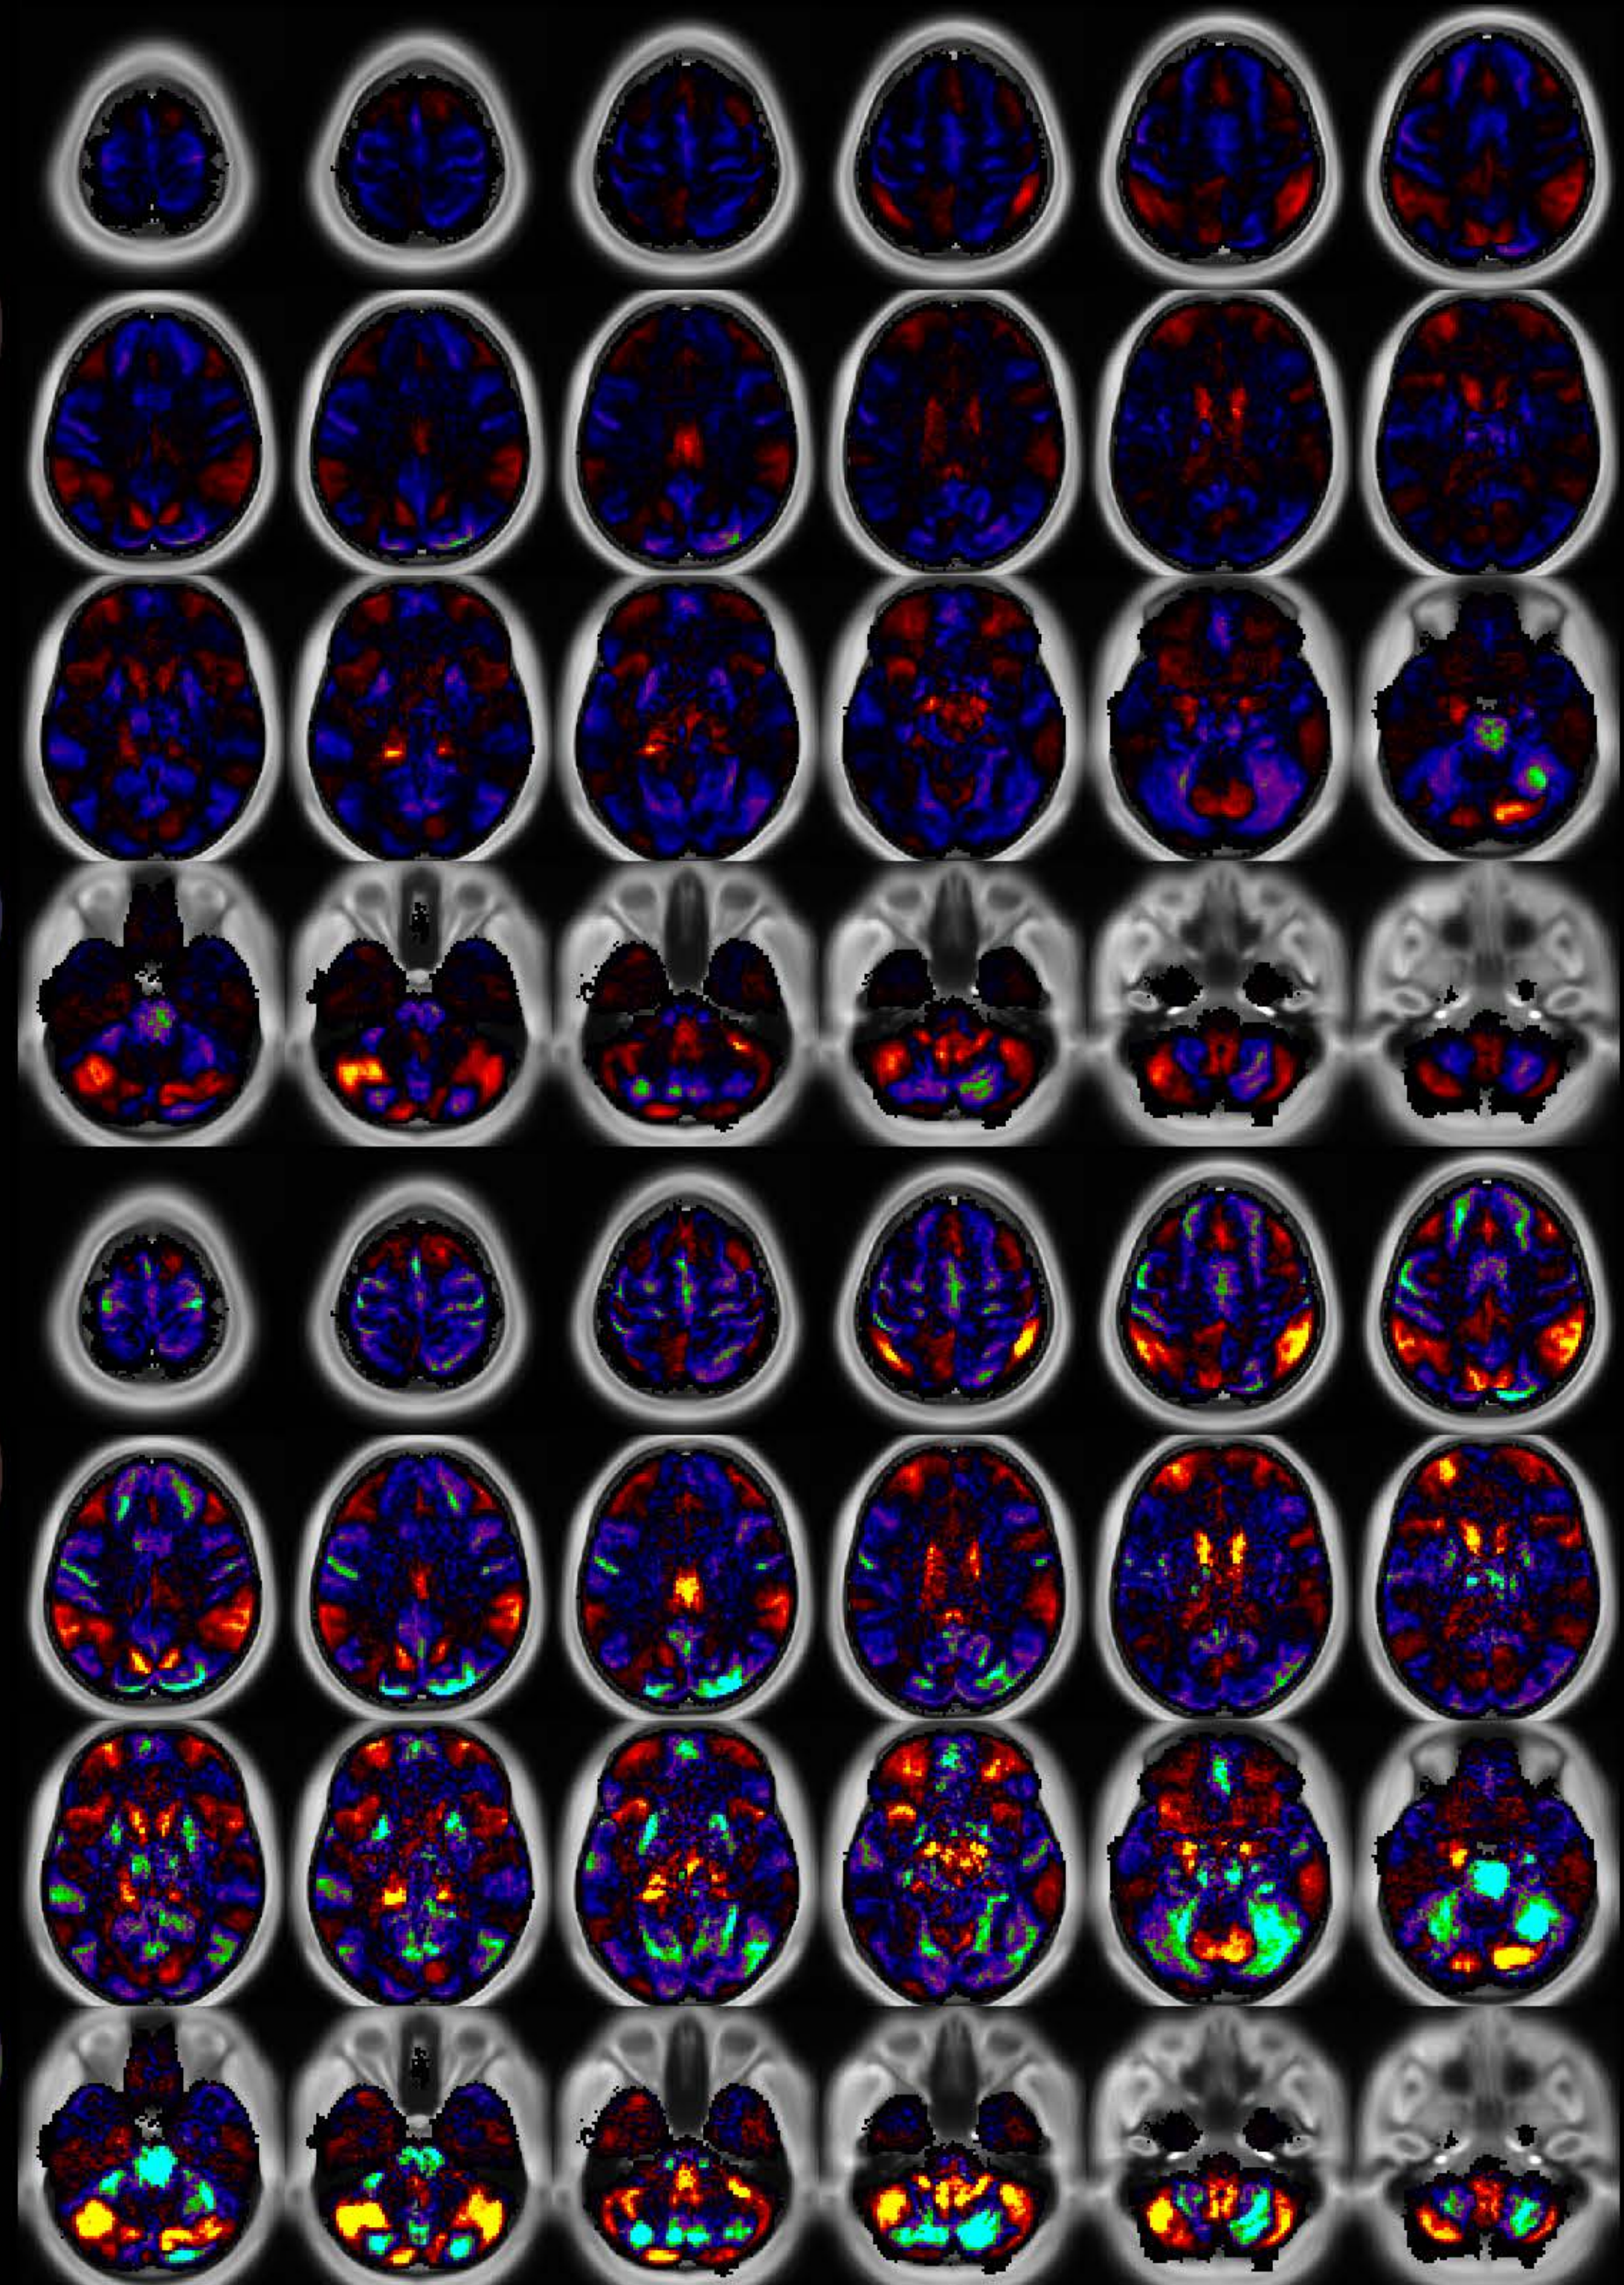

Seconds

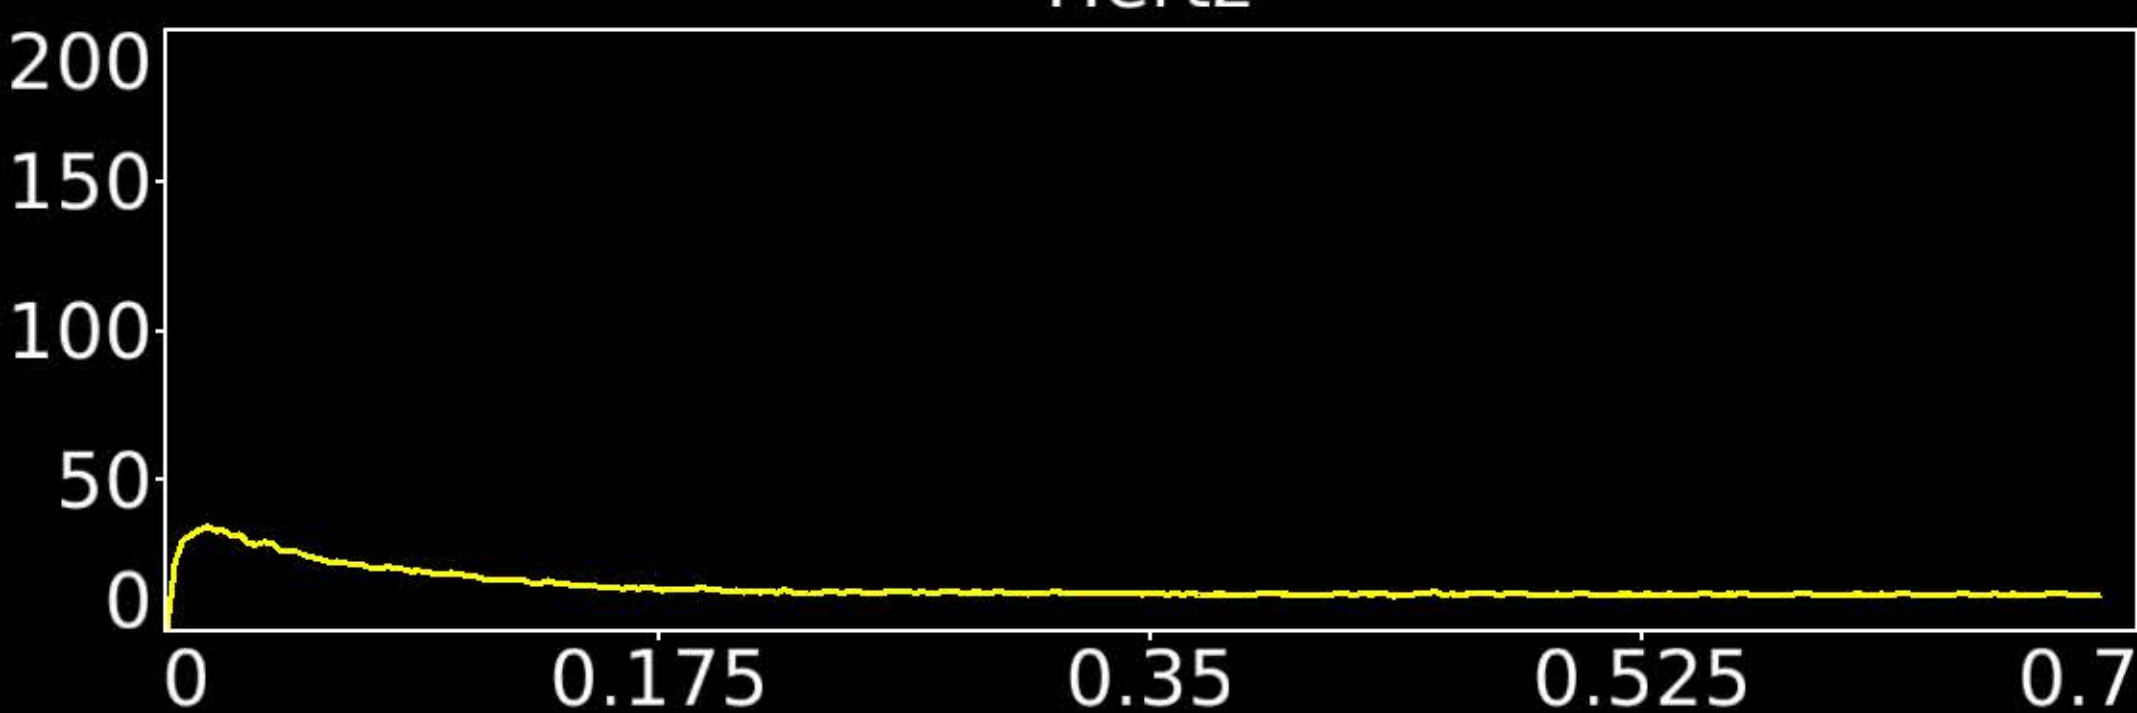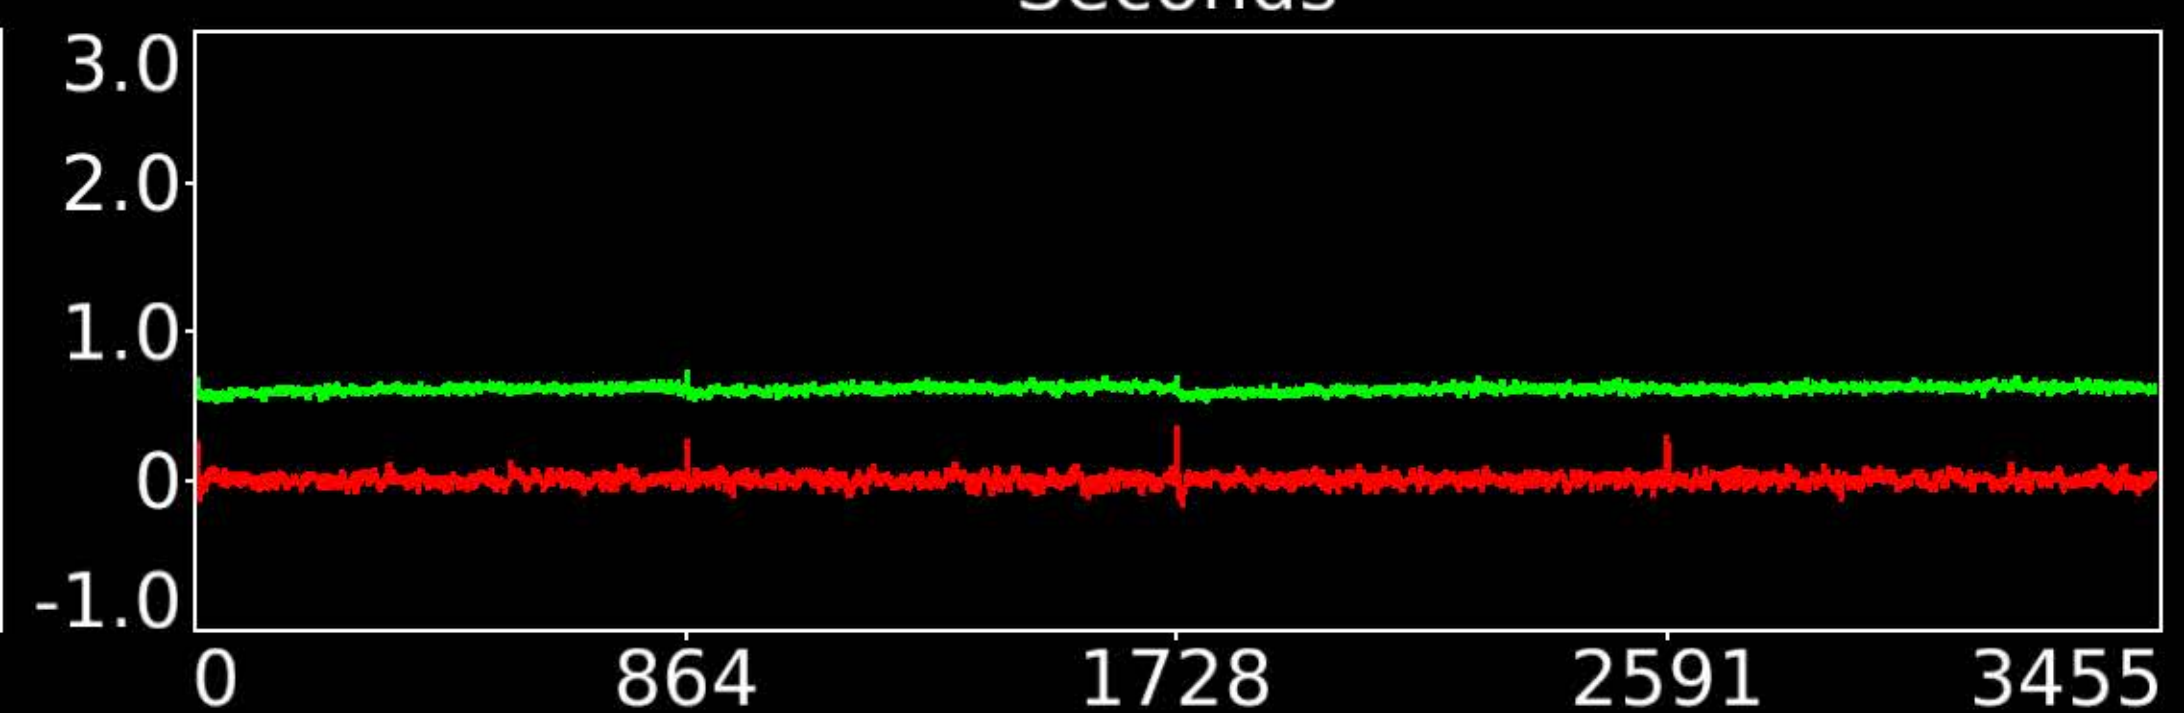

|                           |                            |                                                         |  |
|---------------------------|----------------------------|---------------------------------------------------------|--|
| Number & Class: 55 Signal |                            | Name: Highly Globally Correlated Single Subject: Sleep? |  |
| RVT Correlated: No        | DVARS Dip Associated: No   | Cross-Subject Variable: No                              |  |
| Single Subject: Yes       | % Variance Explained: 0.57 | Globality Index: 0.54                                   |  |
| Task Component: No        | Taskr Component: No        | Sleep Noted: No                                         |  |

Rationale: Controversial: Single subject component with high correlation to global timecourse; looked more like RC1 than global noise components)



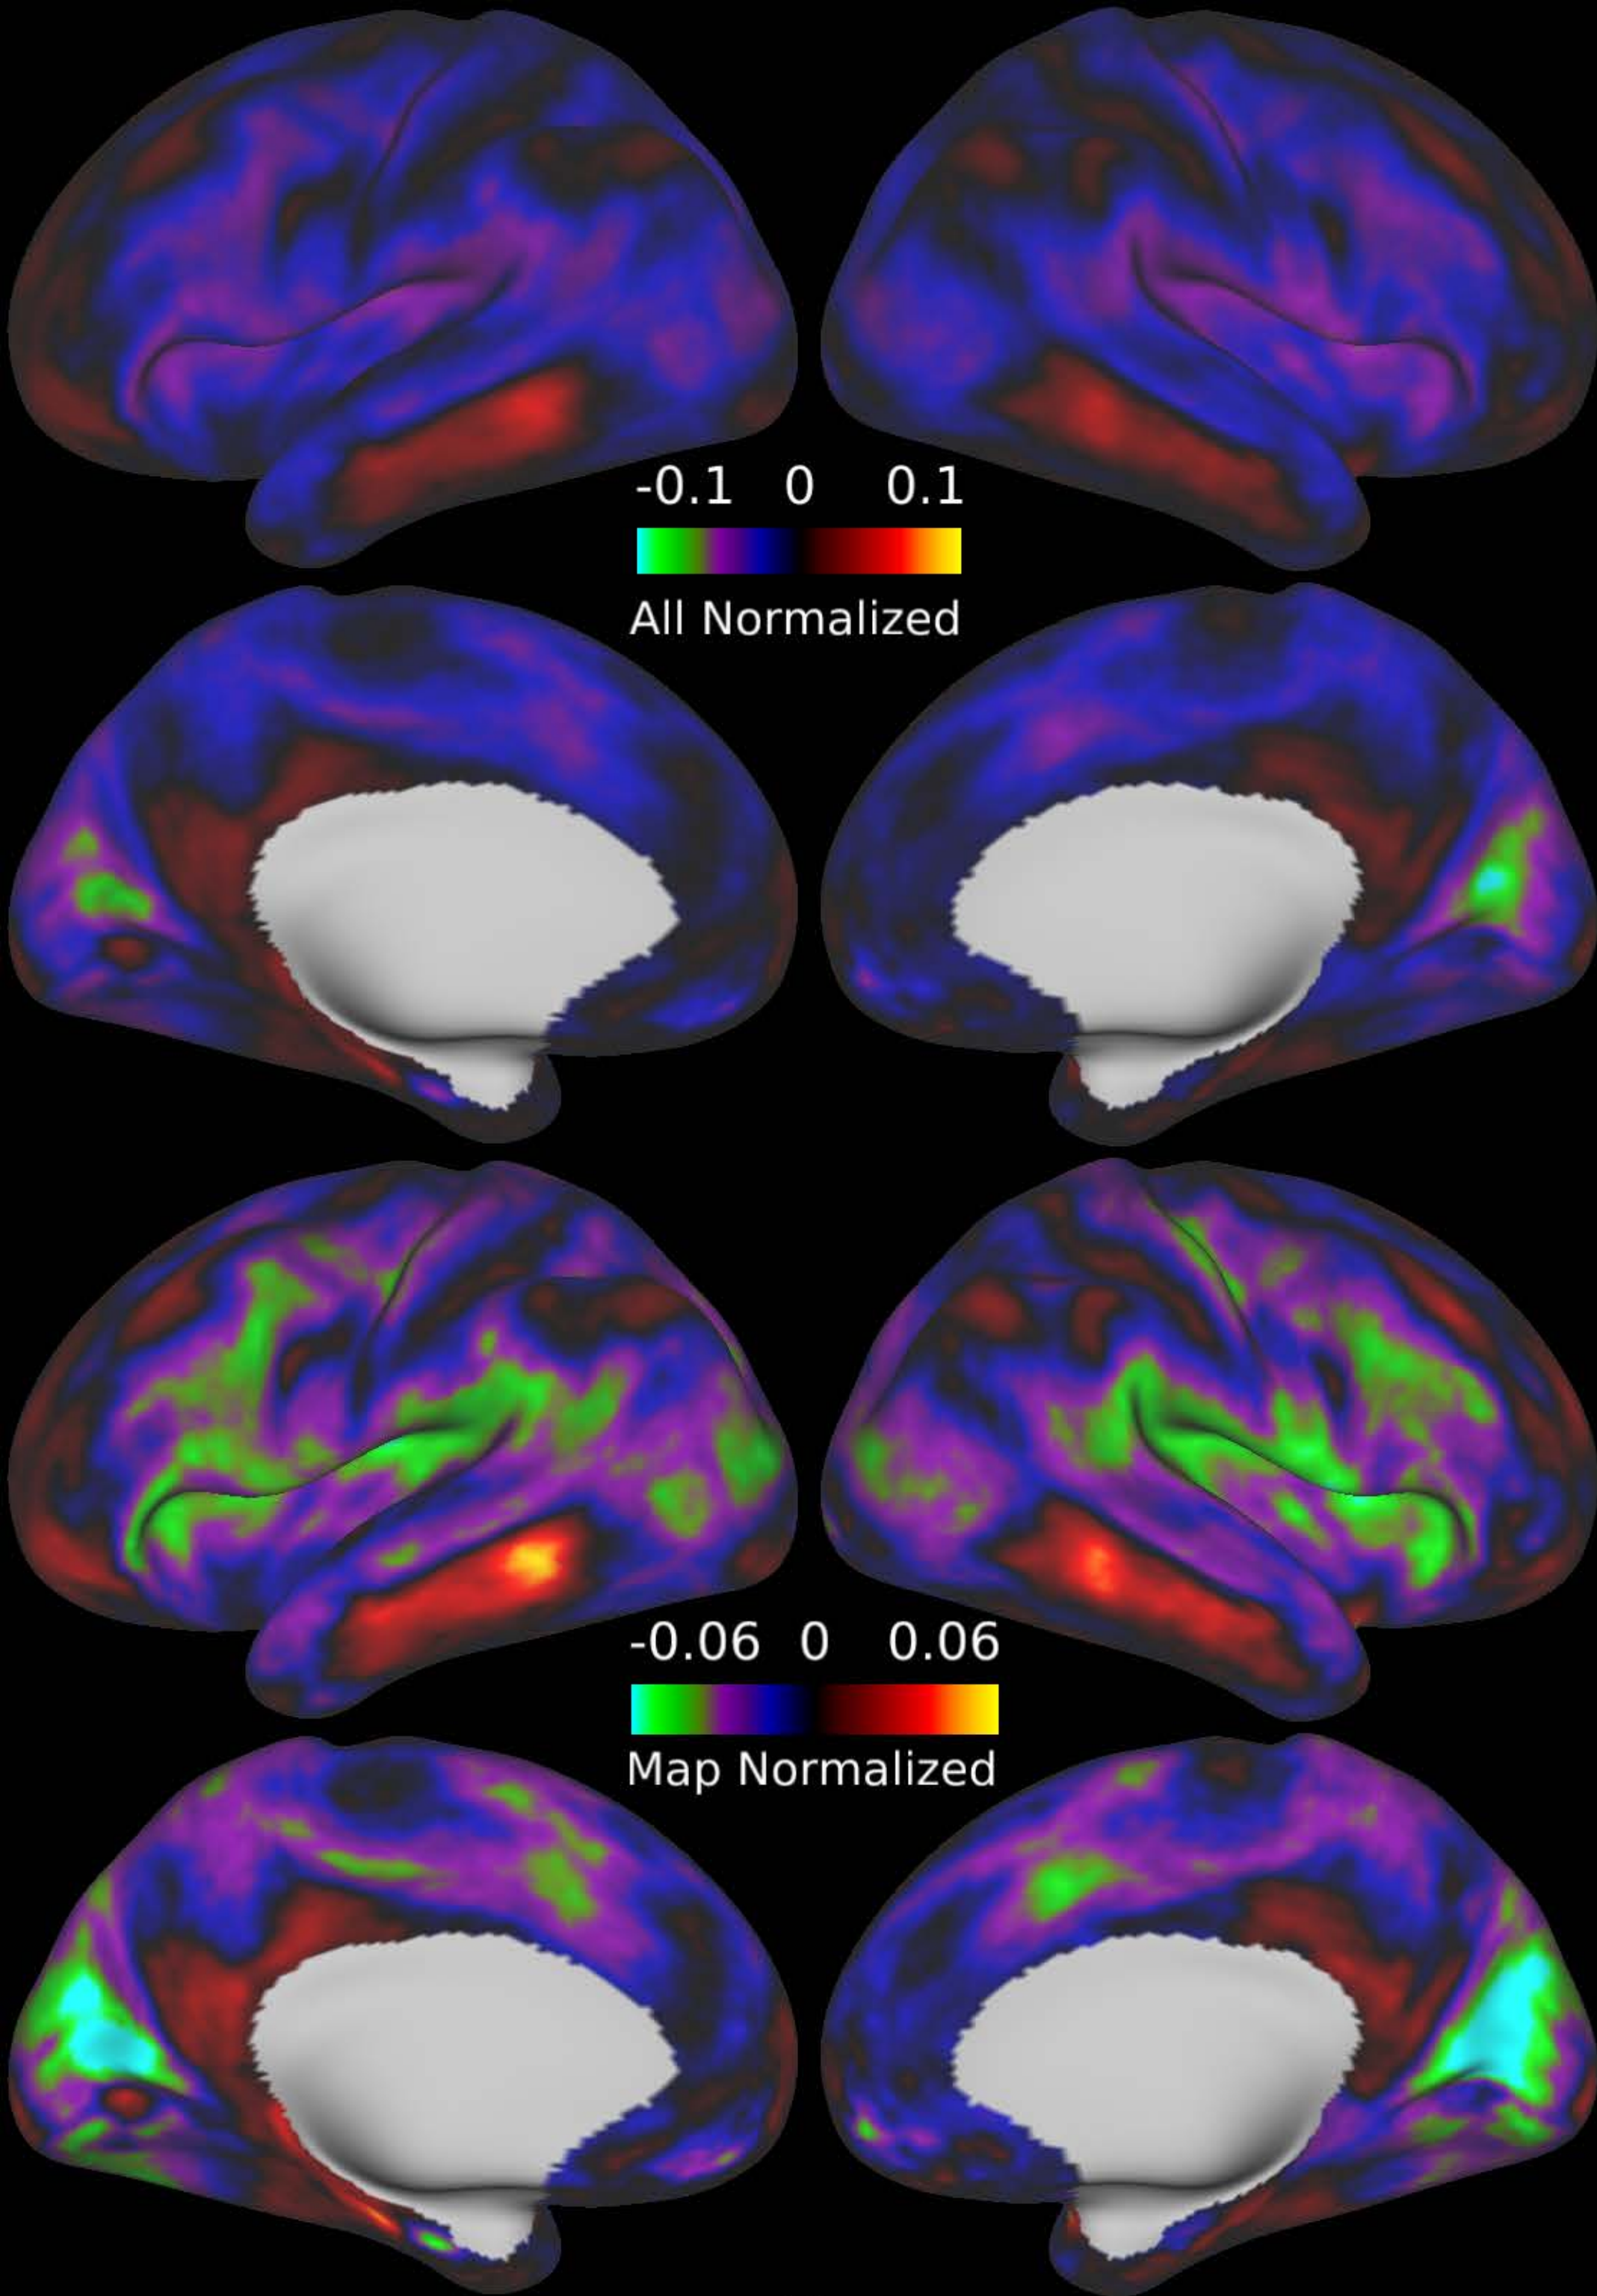

Hertz

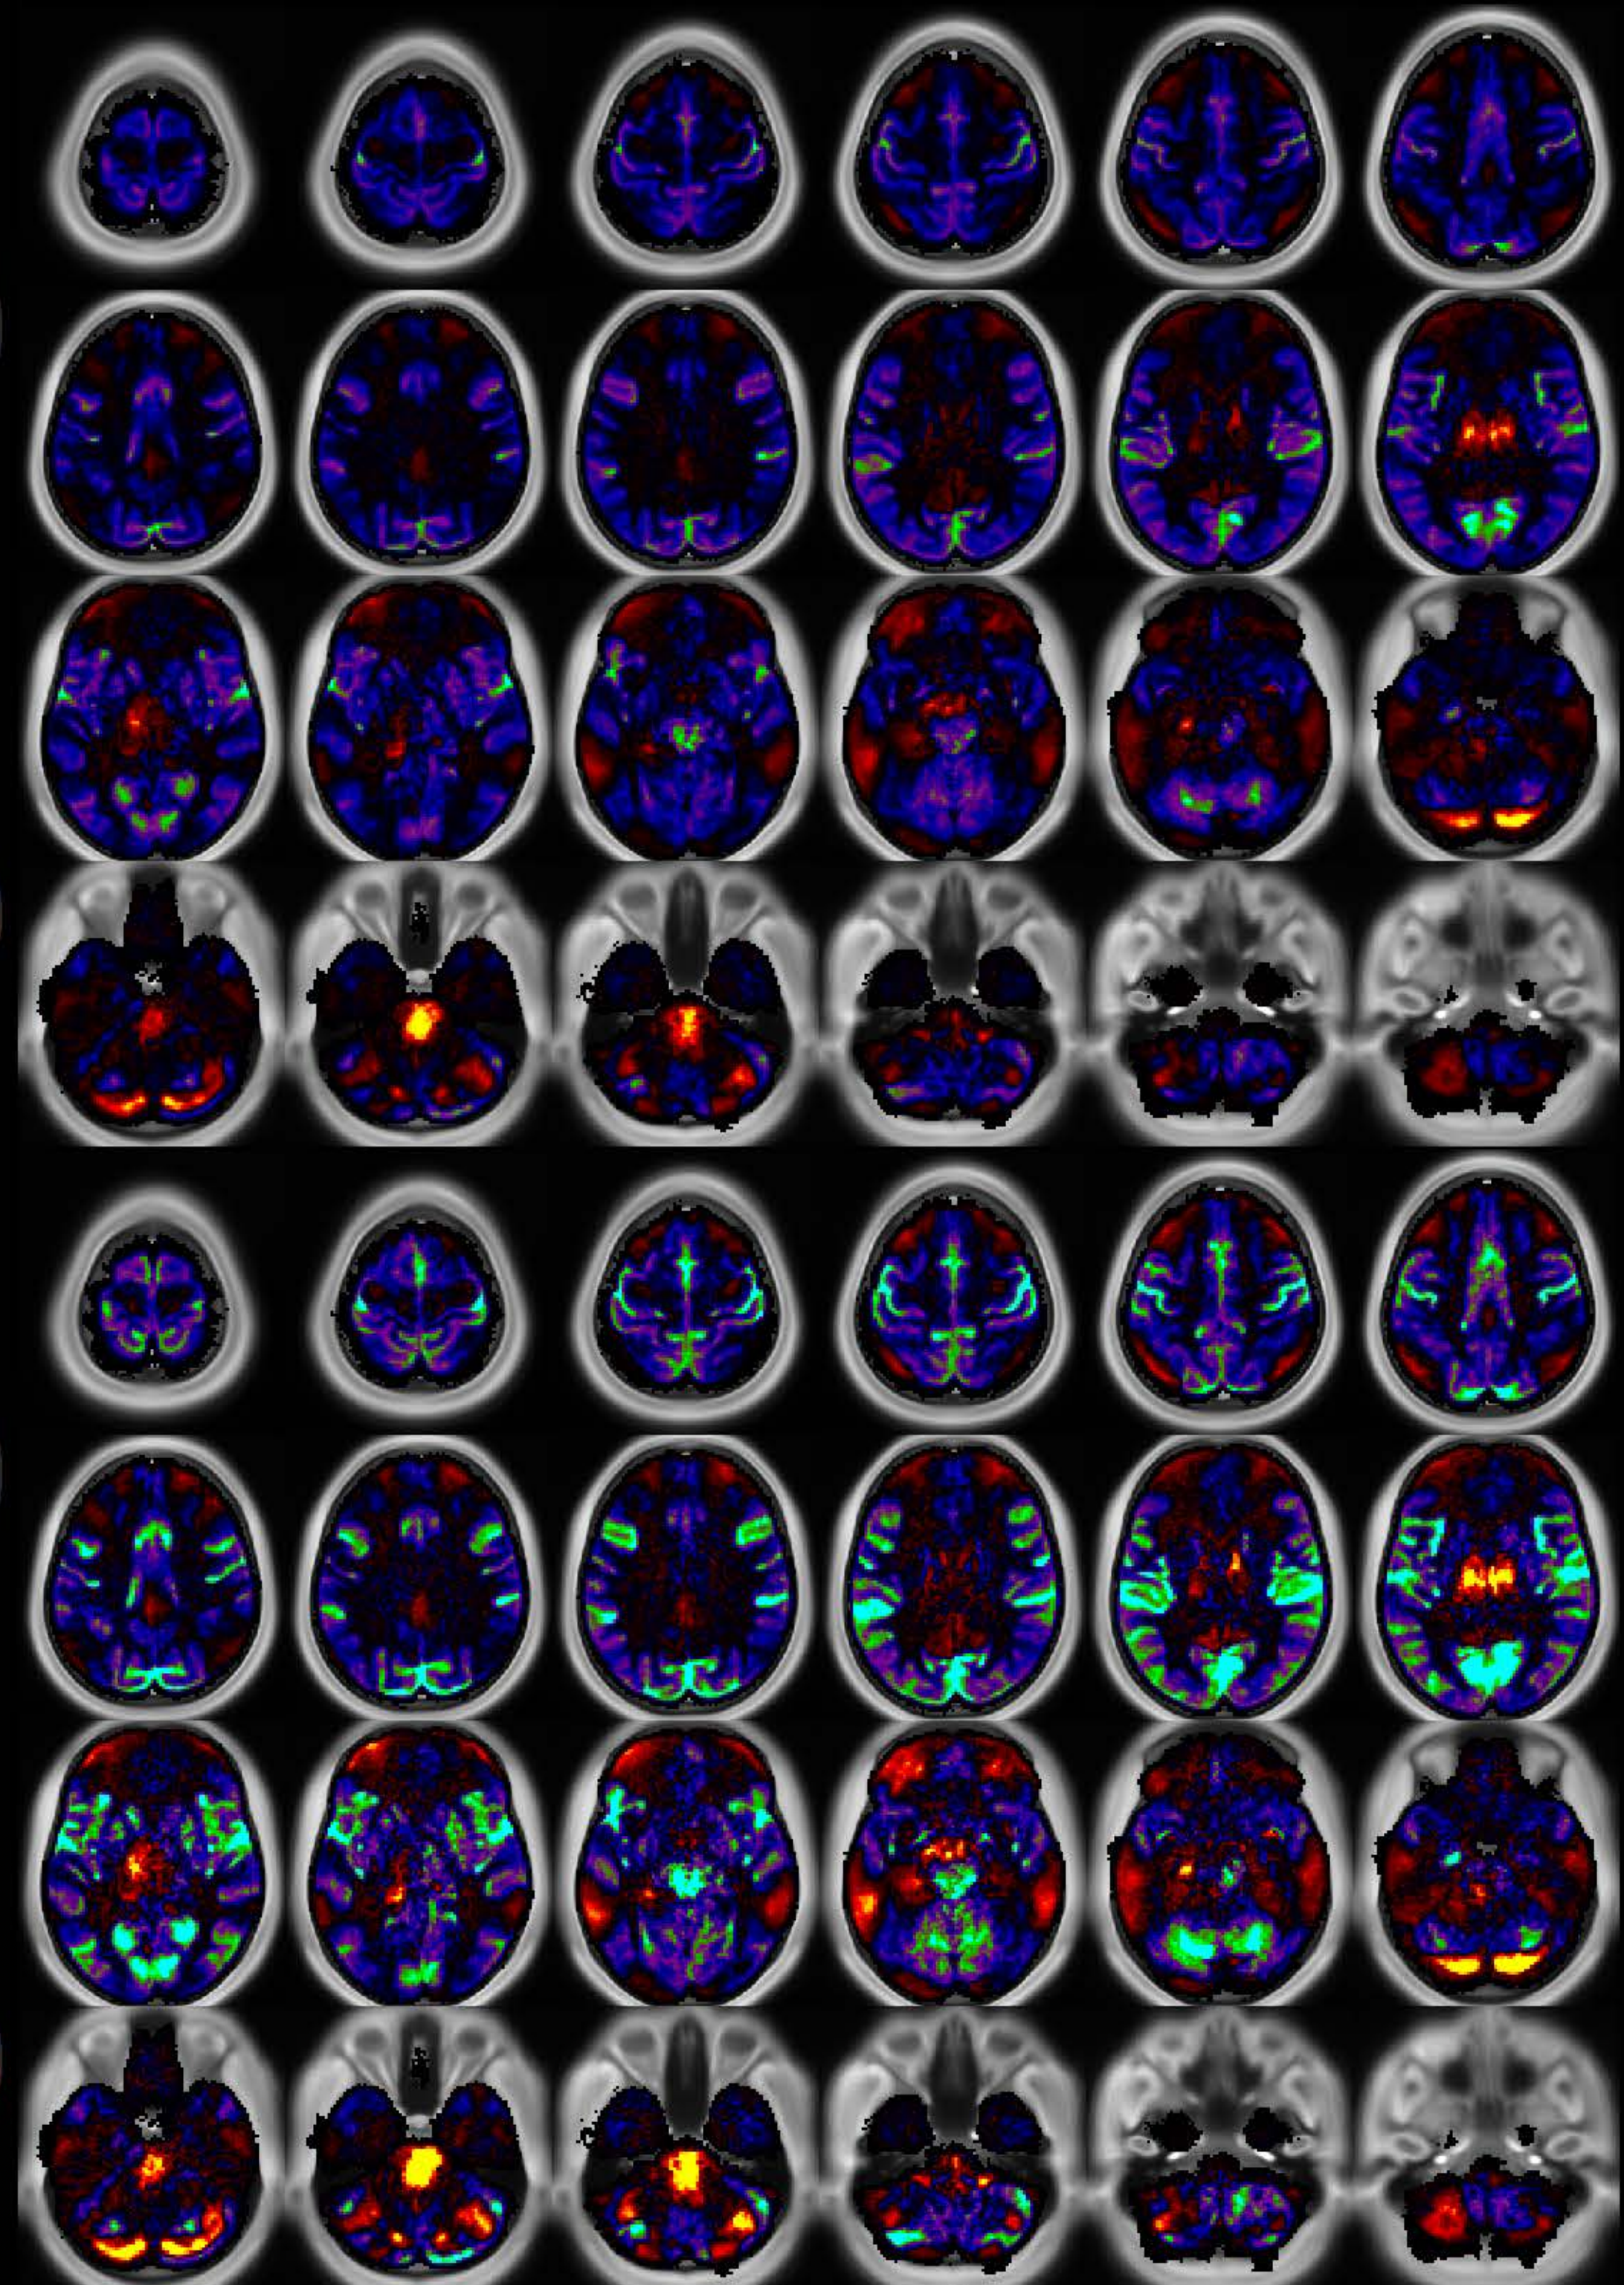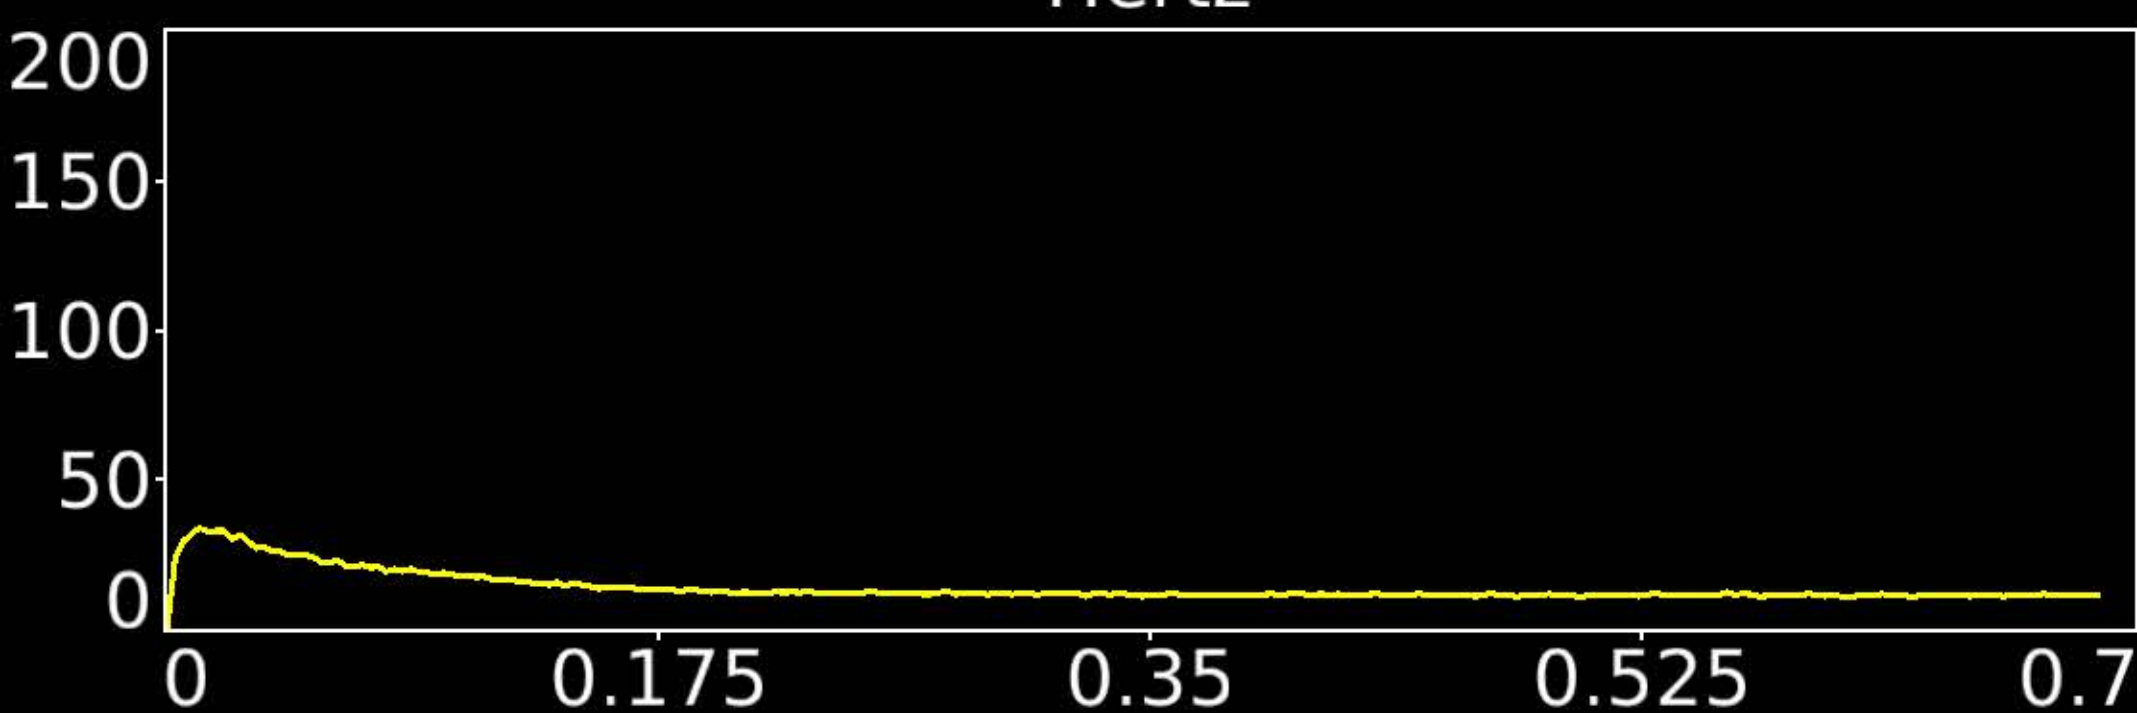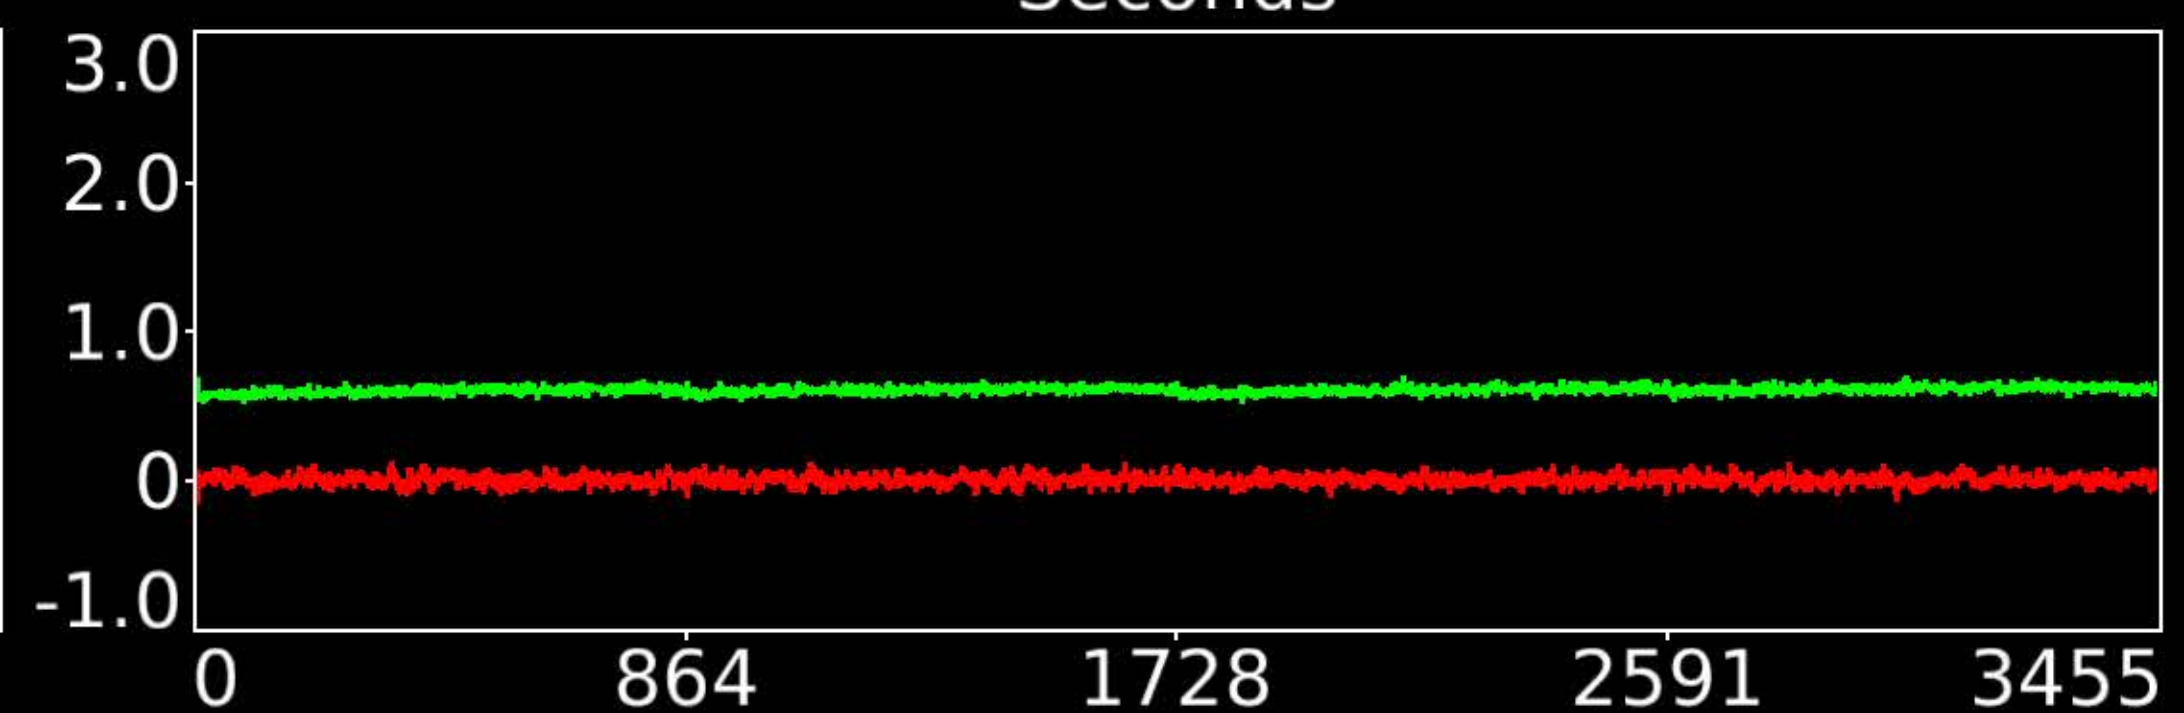

|                           |                            |                                                         |  |
|---------------------------|----------------------------|---------------------------------------------------------|--|
| Number & Class: 56 Signal |                            | Name: Highly Globally Correlated Single Subject: Sleep? |  |
| RVT Correlated: No        | DVARS Dip Associated: No   | Cross-Subject Variable: No                              |  |
| Single Subject: Yes       | % Variance Explained: 0.56 | Globality Index: 1.4                                    |  |
| Task Component: No        | Taskr Component: No        | Sleep Noted: No                                         |  |

Rationale: Controversial: Single subject component with high correlation to global timecourse; looked more like RC1 than global noise components)



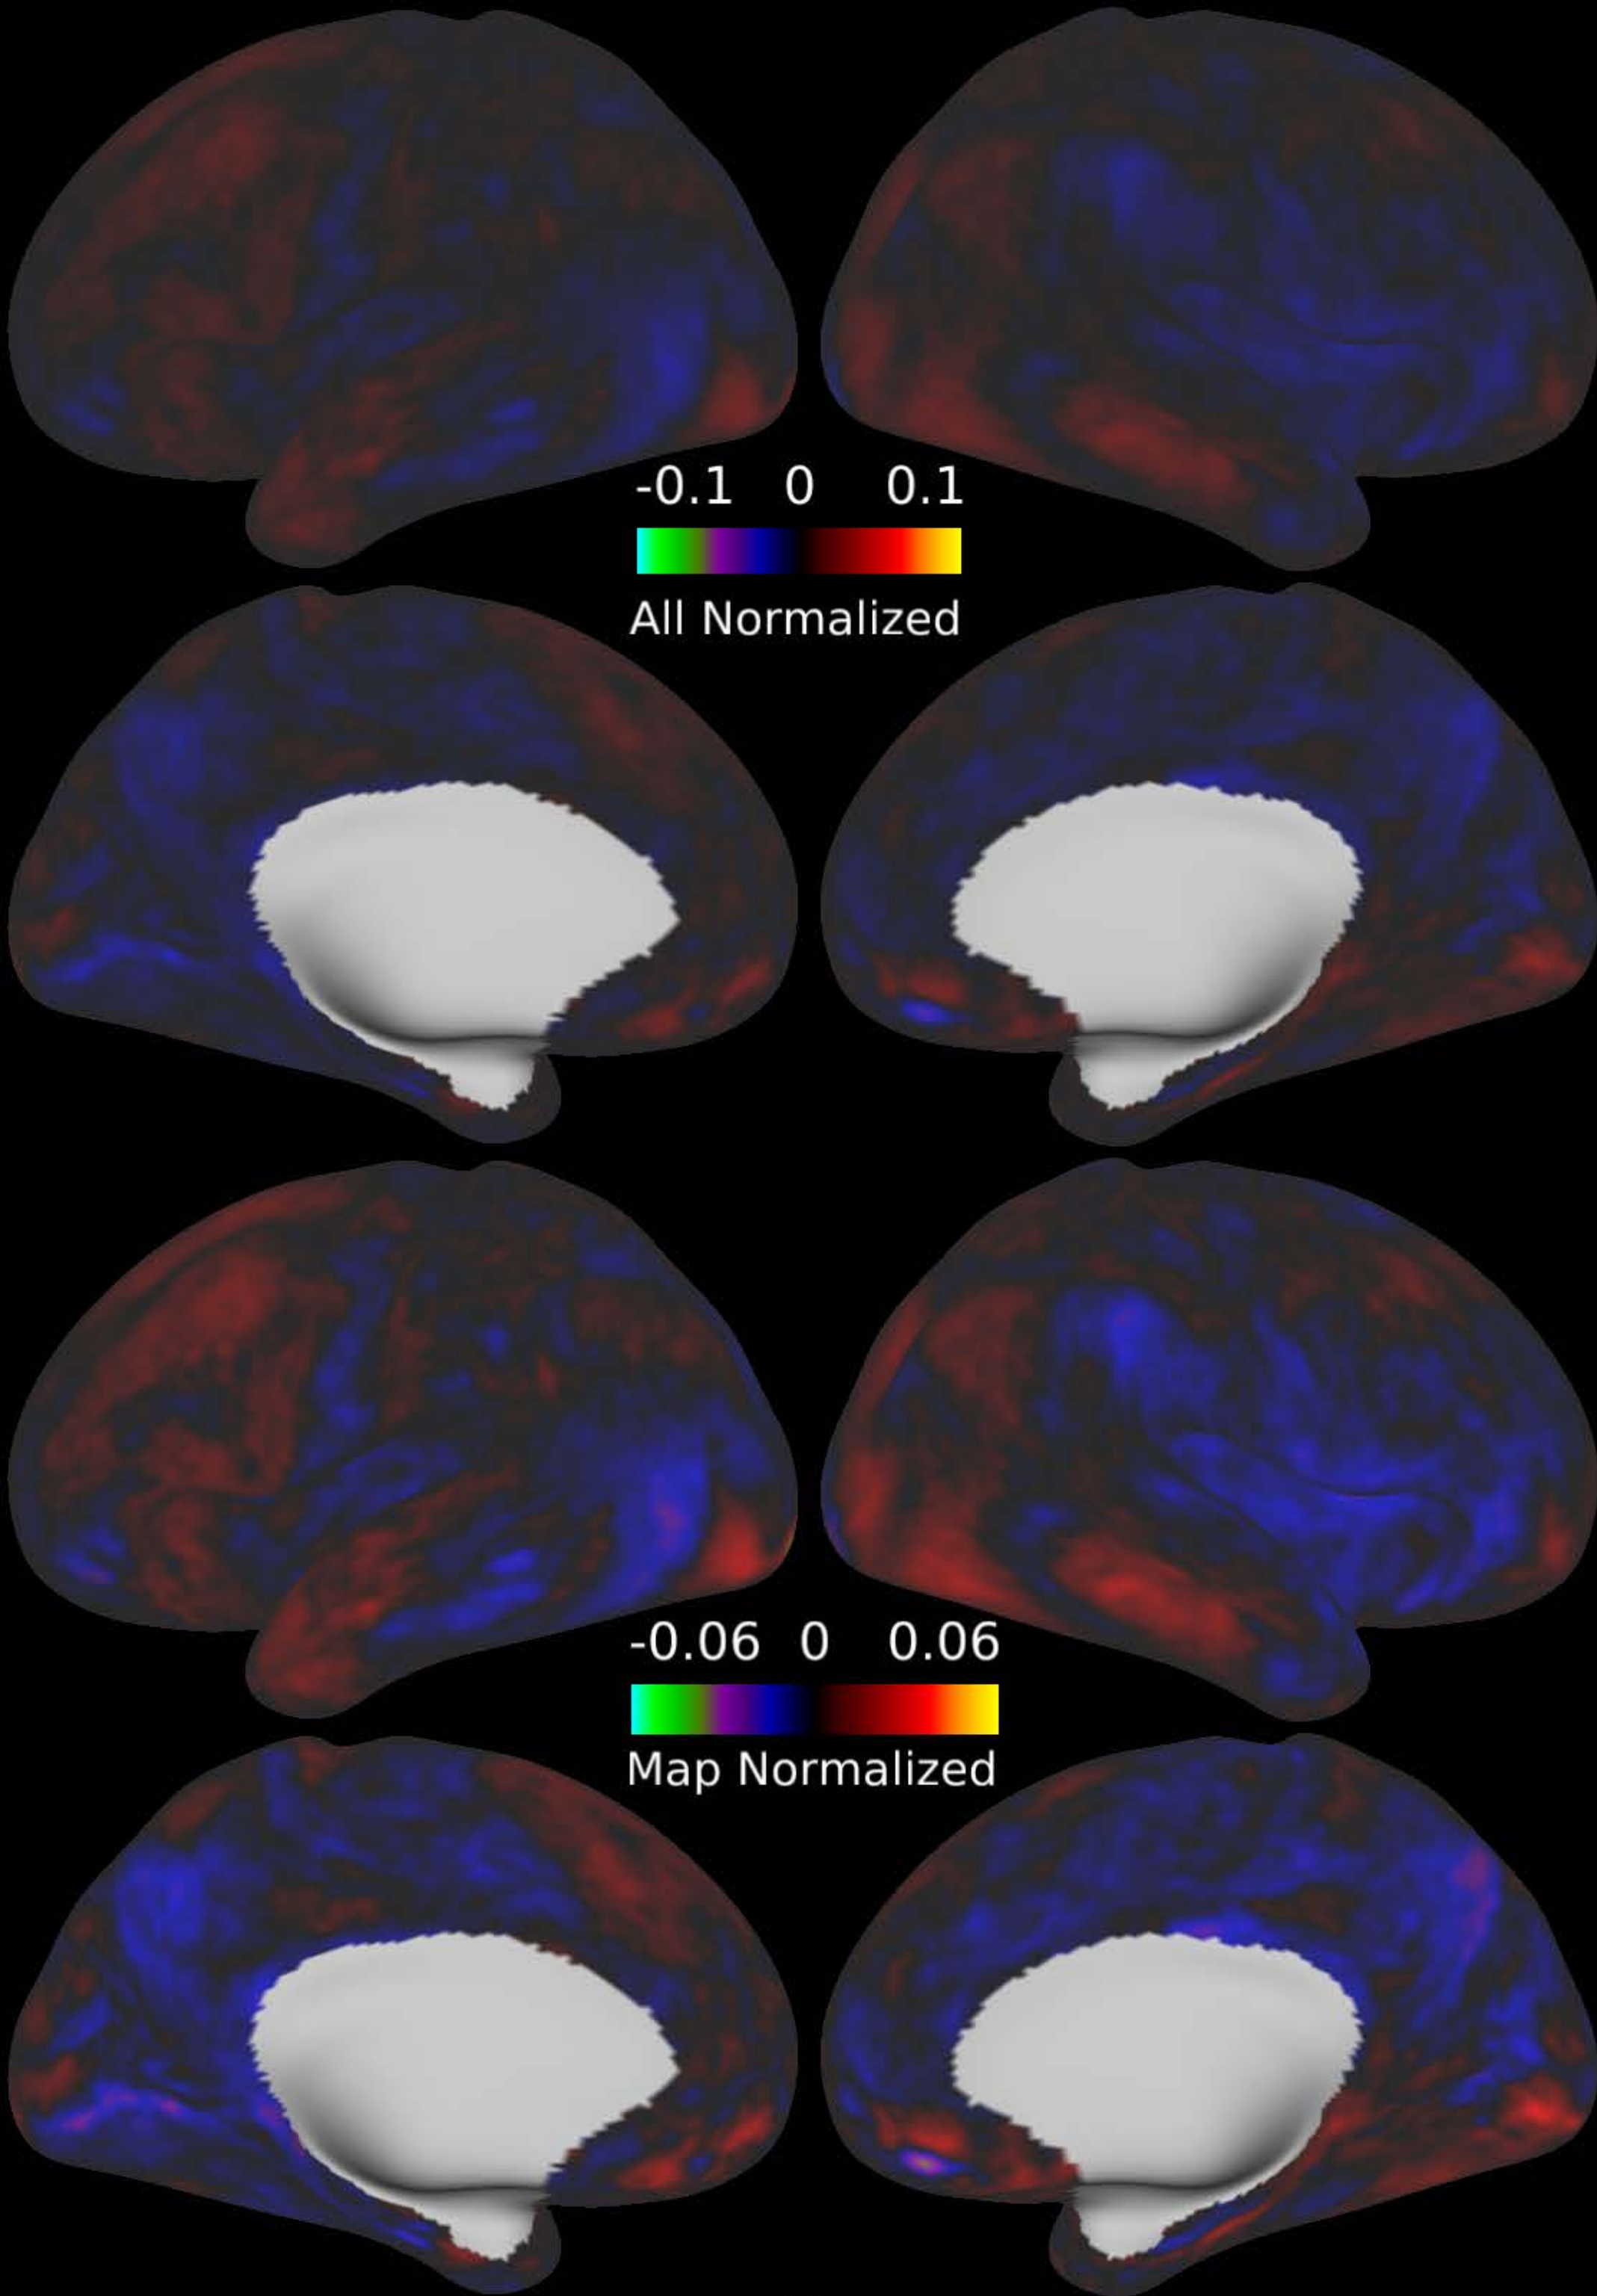

Hertz

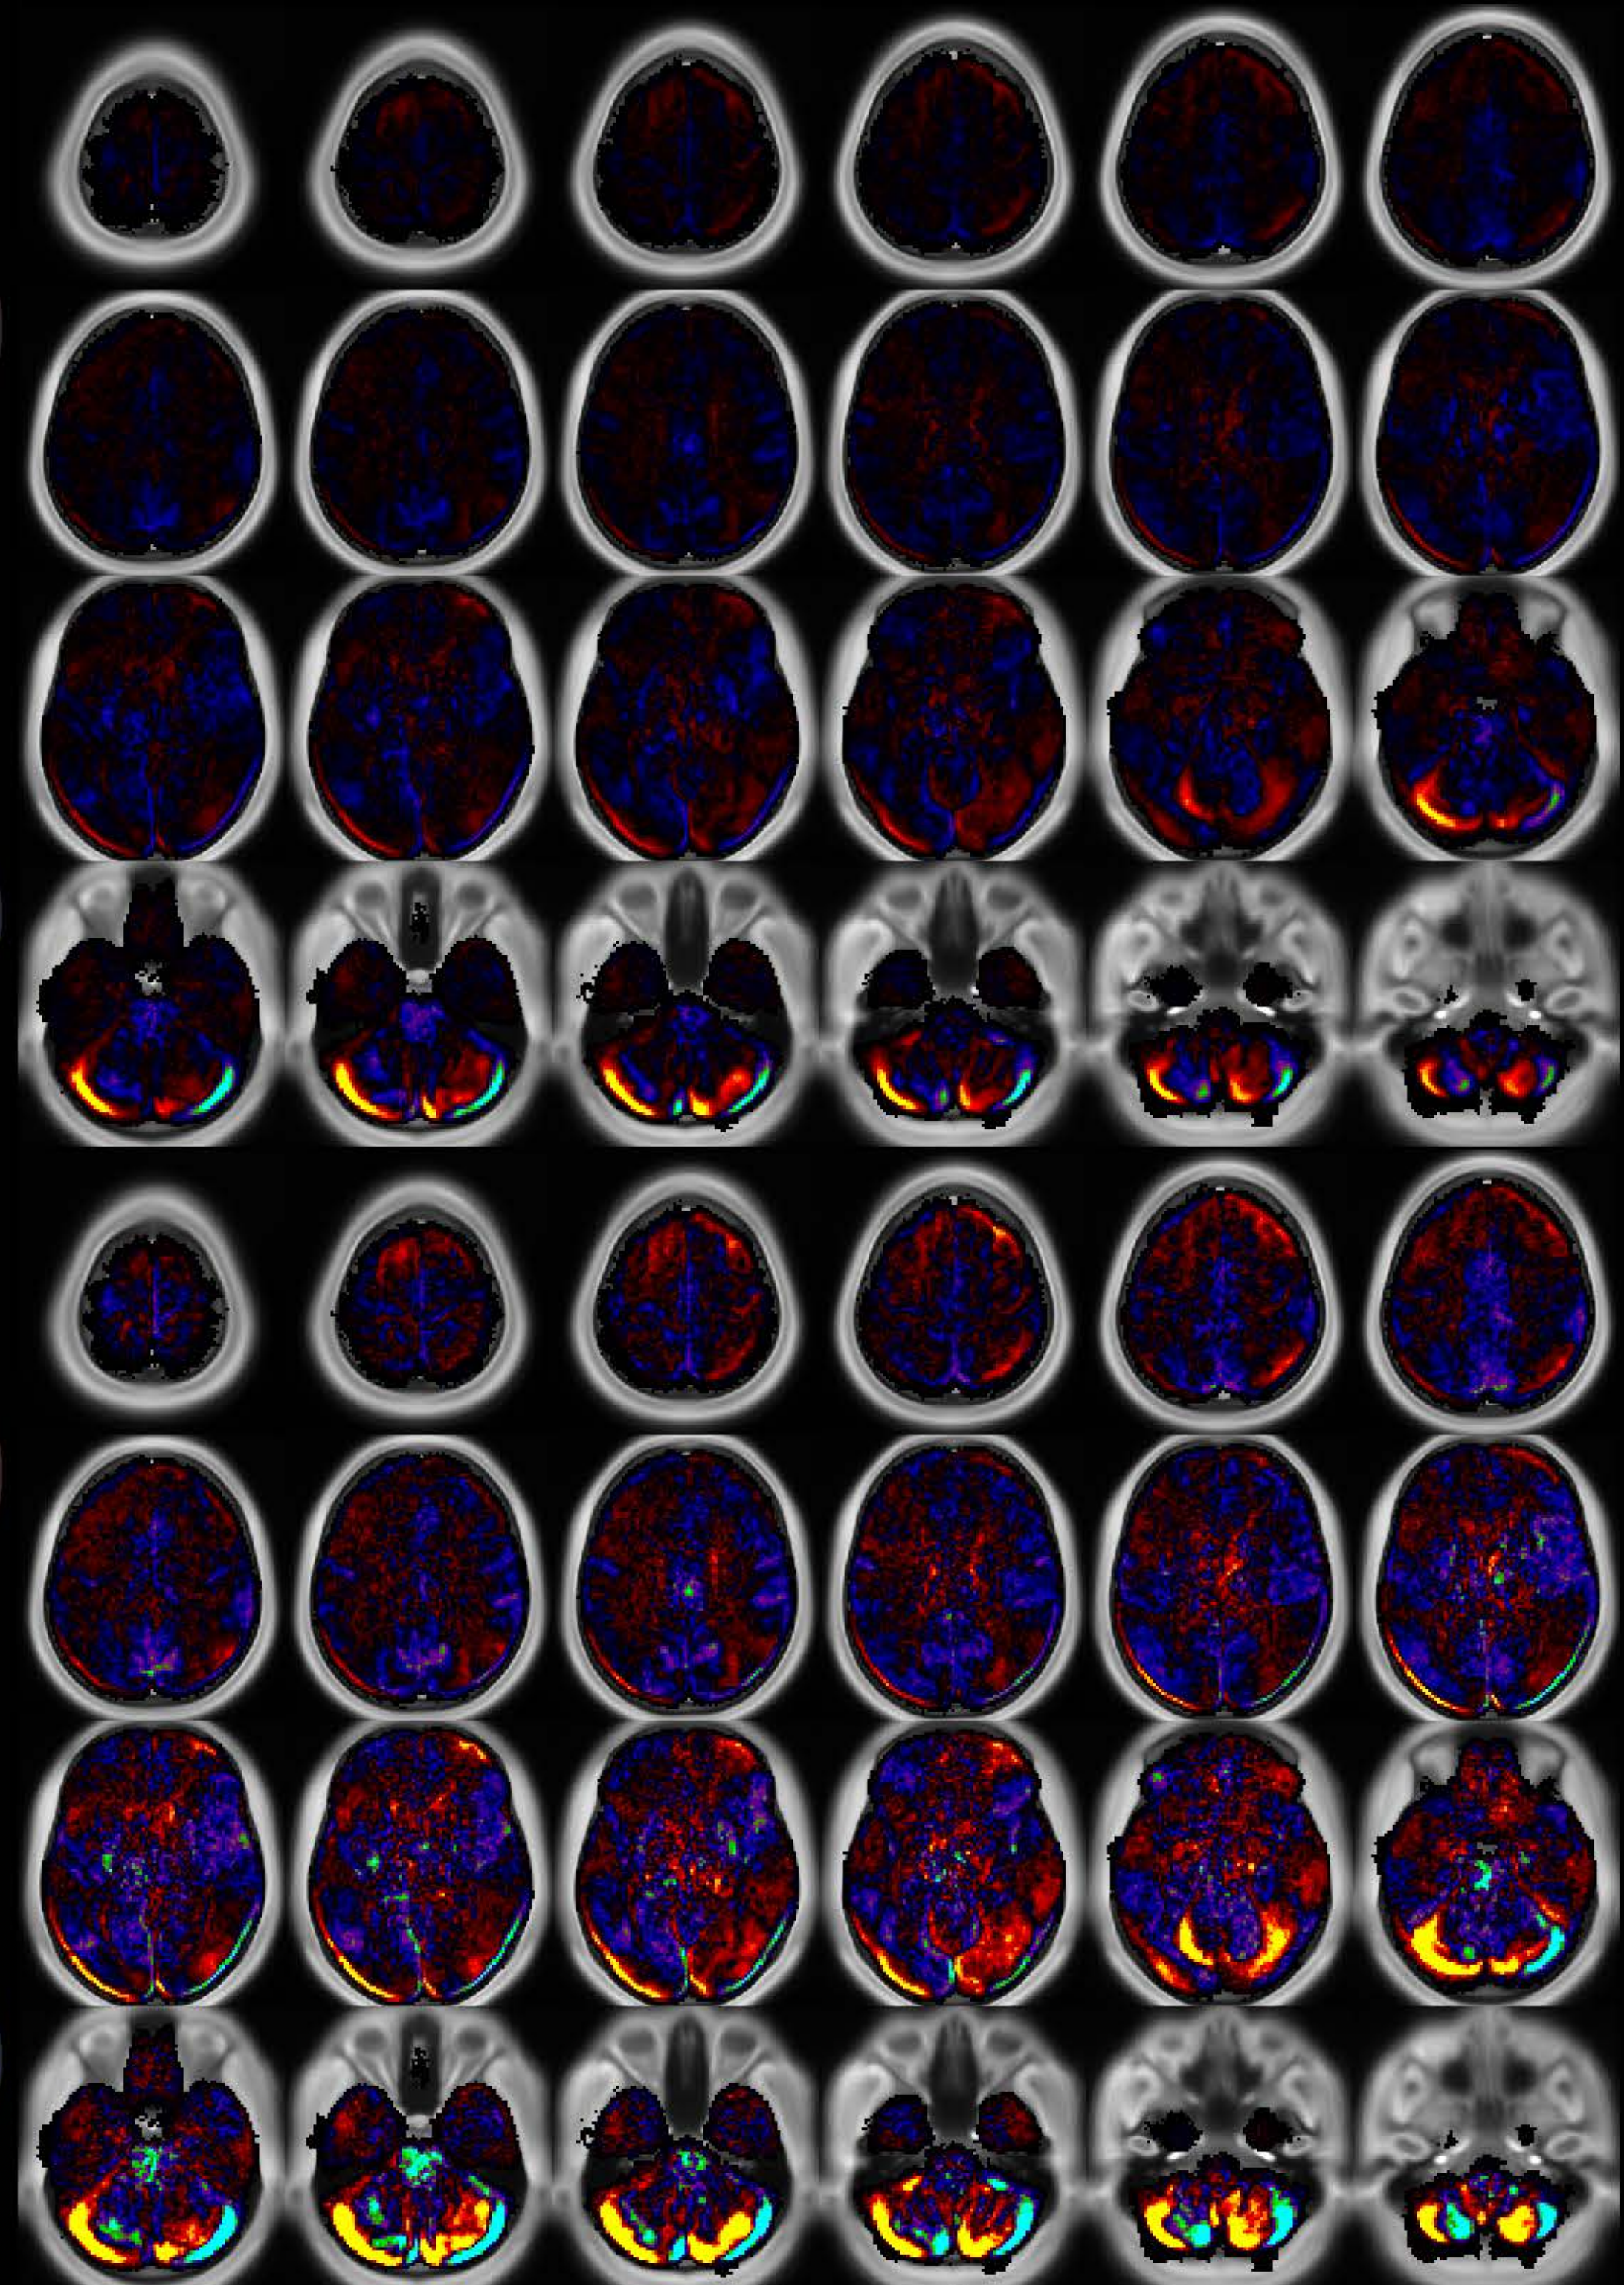

Seconds

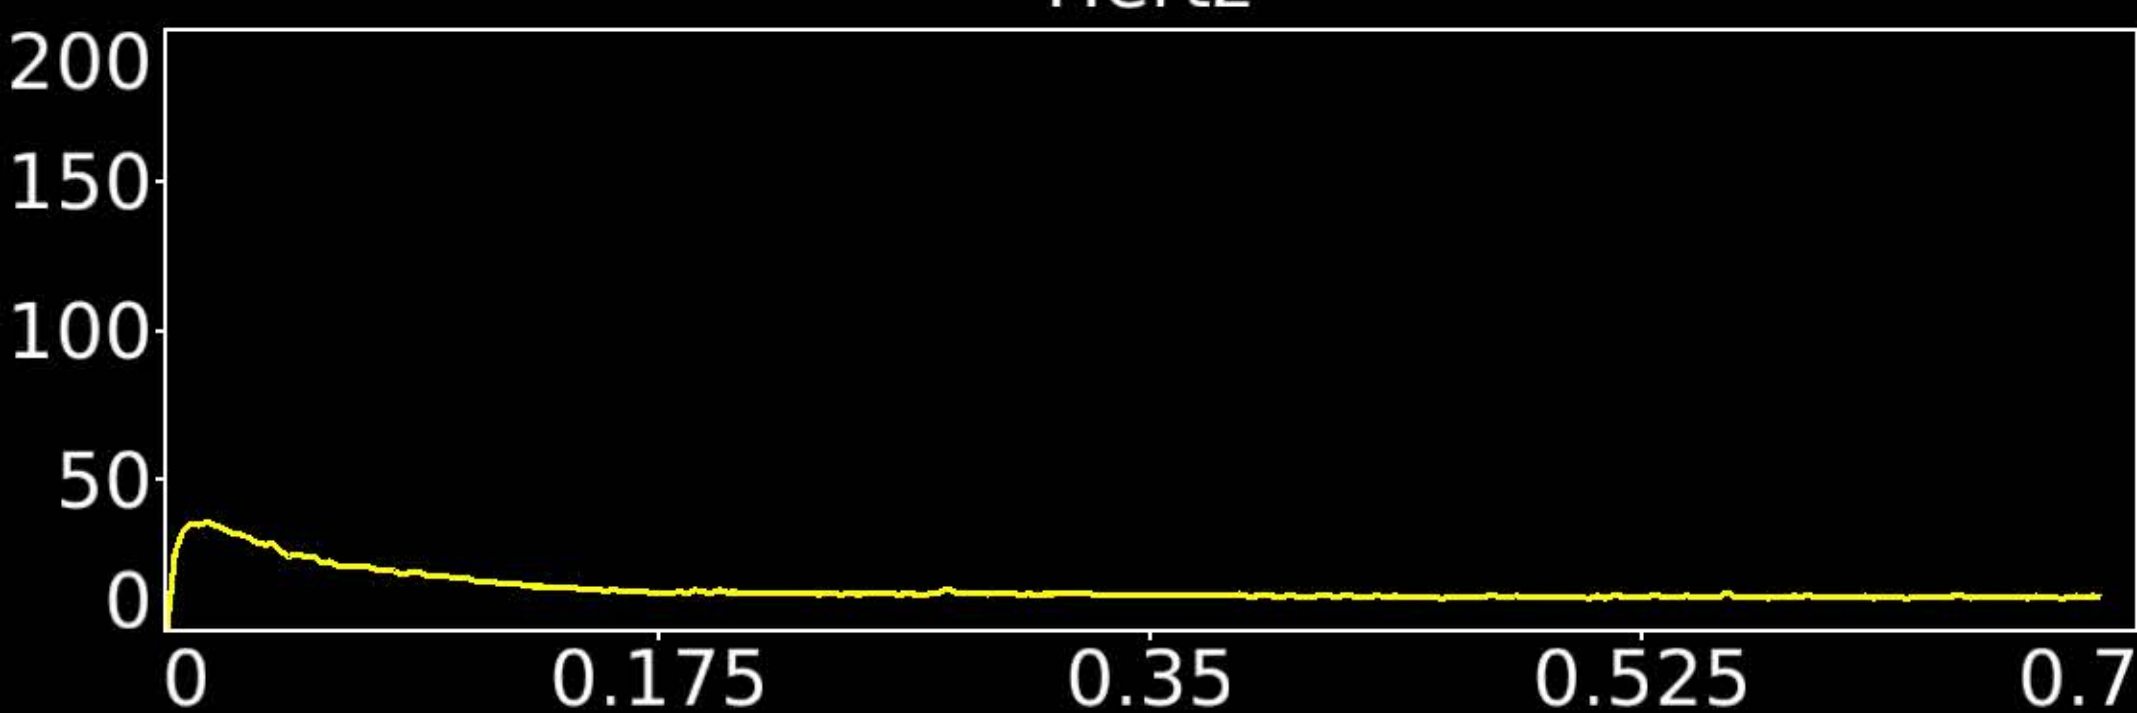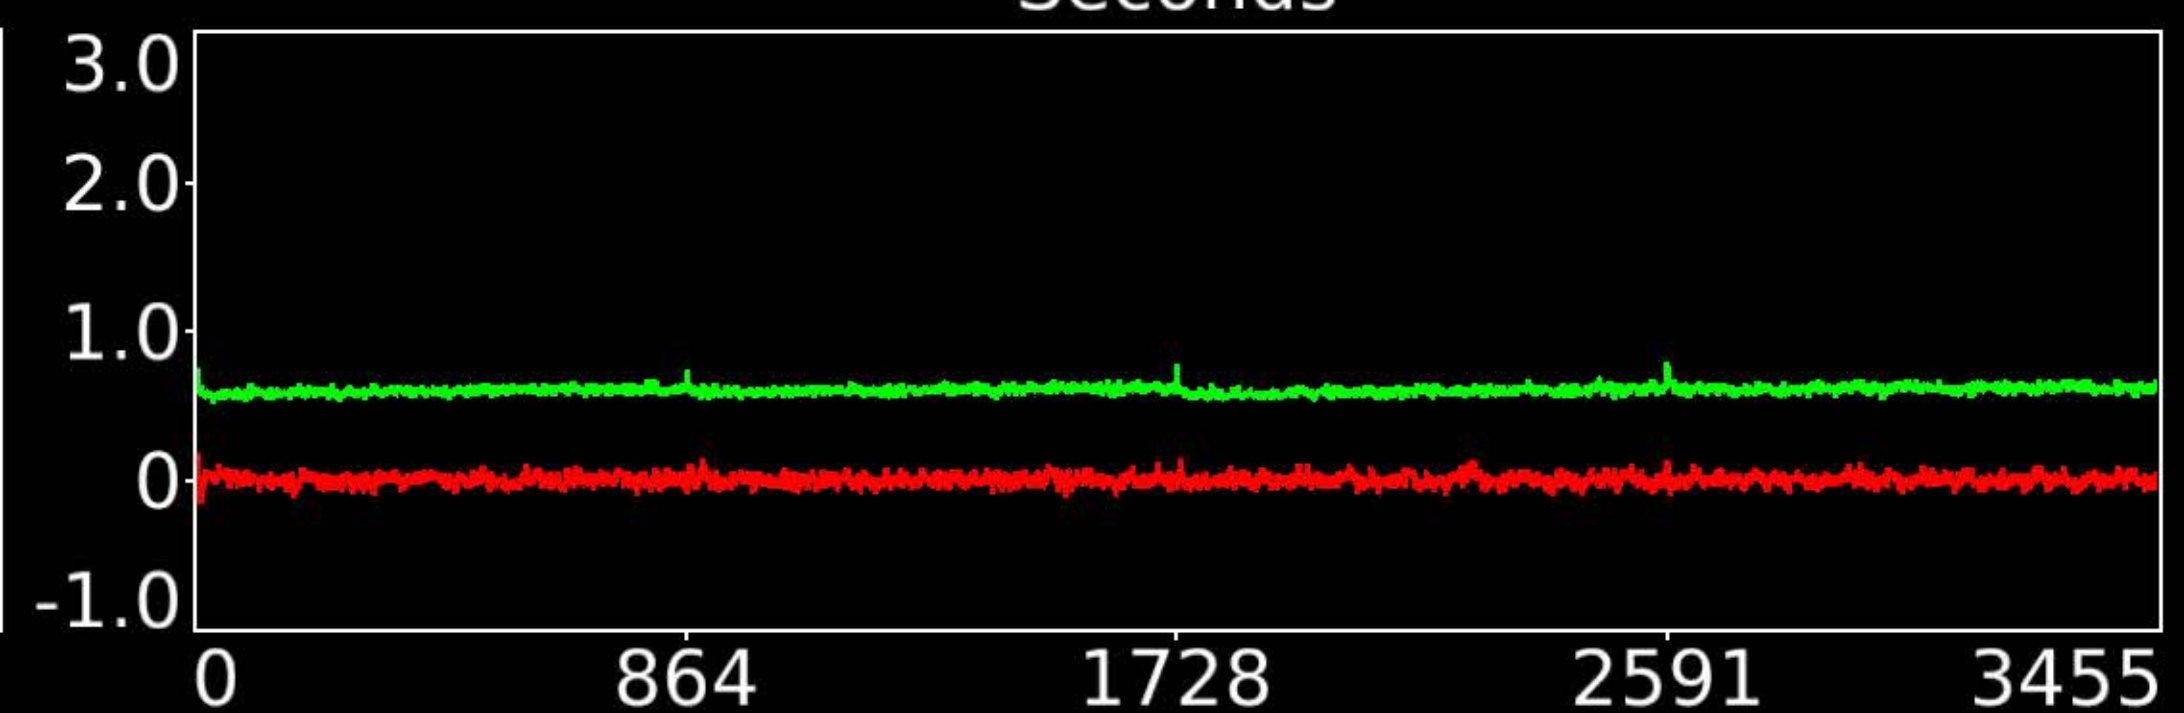

|                                                                                                                                                       |                            |                                         |  |
|-------------------------------------------------------------------------------------------------------------------------------------------------------|----------------------------|-----------------------------------------|--|
| Number & Class: 57 Noise                                                                                                                              |                            | Name: Cerebellar Movement Artifact Left |  |
| RVT Correlated: No                                                                                                                                    | DVARS Dip Associated: Yes  | Cross-Subject Variable: No              |  |
| Single Subject: No                                                                                                                                    | % Variance Explained: 0.57 | Globality Index: 0.28                   |  |
| Task Component: 44                                                                                                                                    | Taskr Component: 34        | Sleep Noted: No                         |  |
| Rationale: Cerebellar edge motion component with high correlation to DVARS dips; looks like movement regressor beta map (derivative of X translation) |                            |                                         |  |



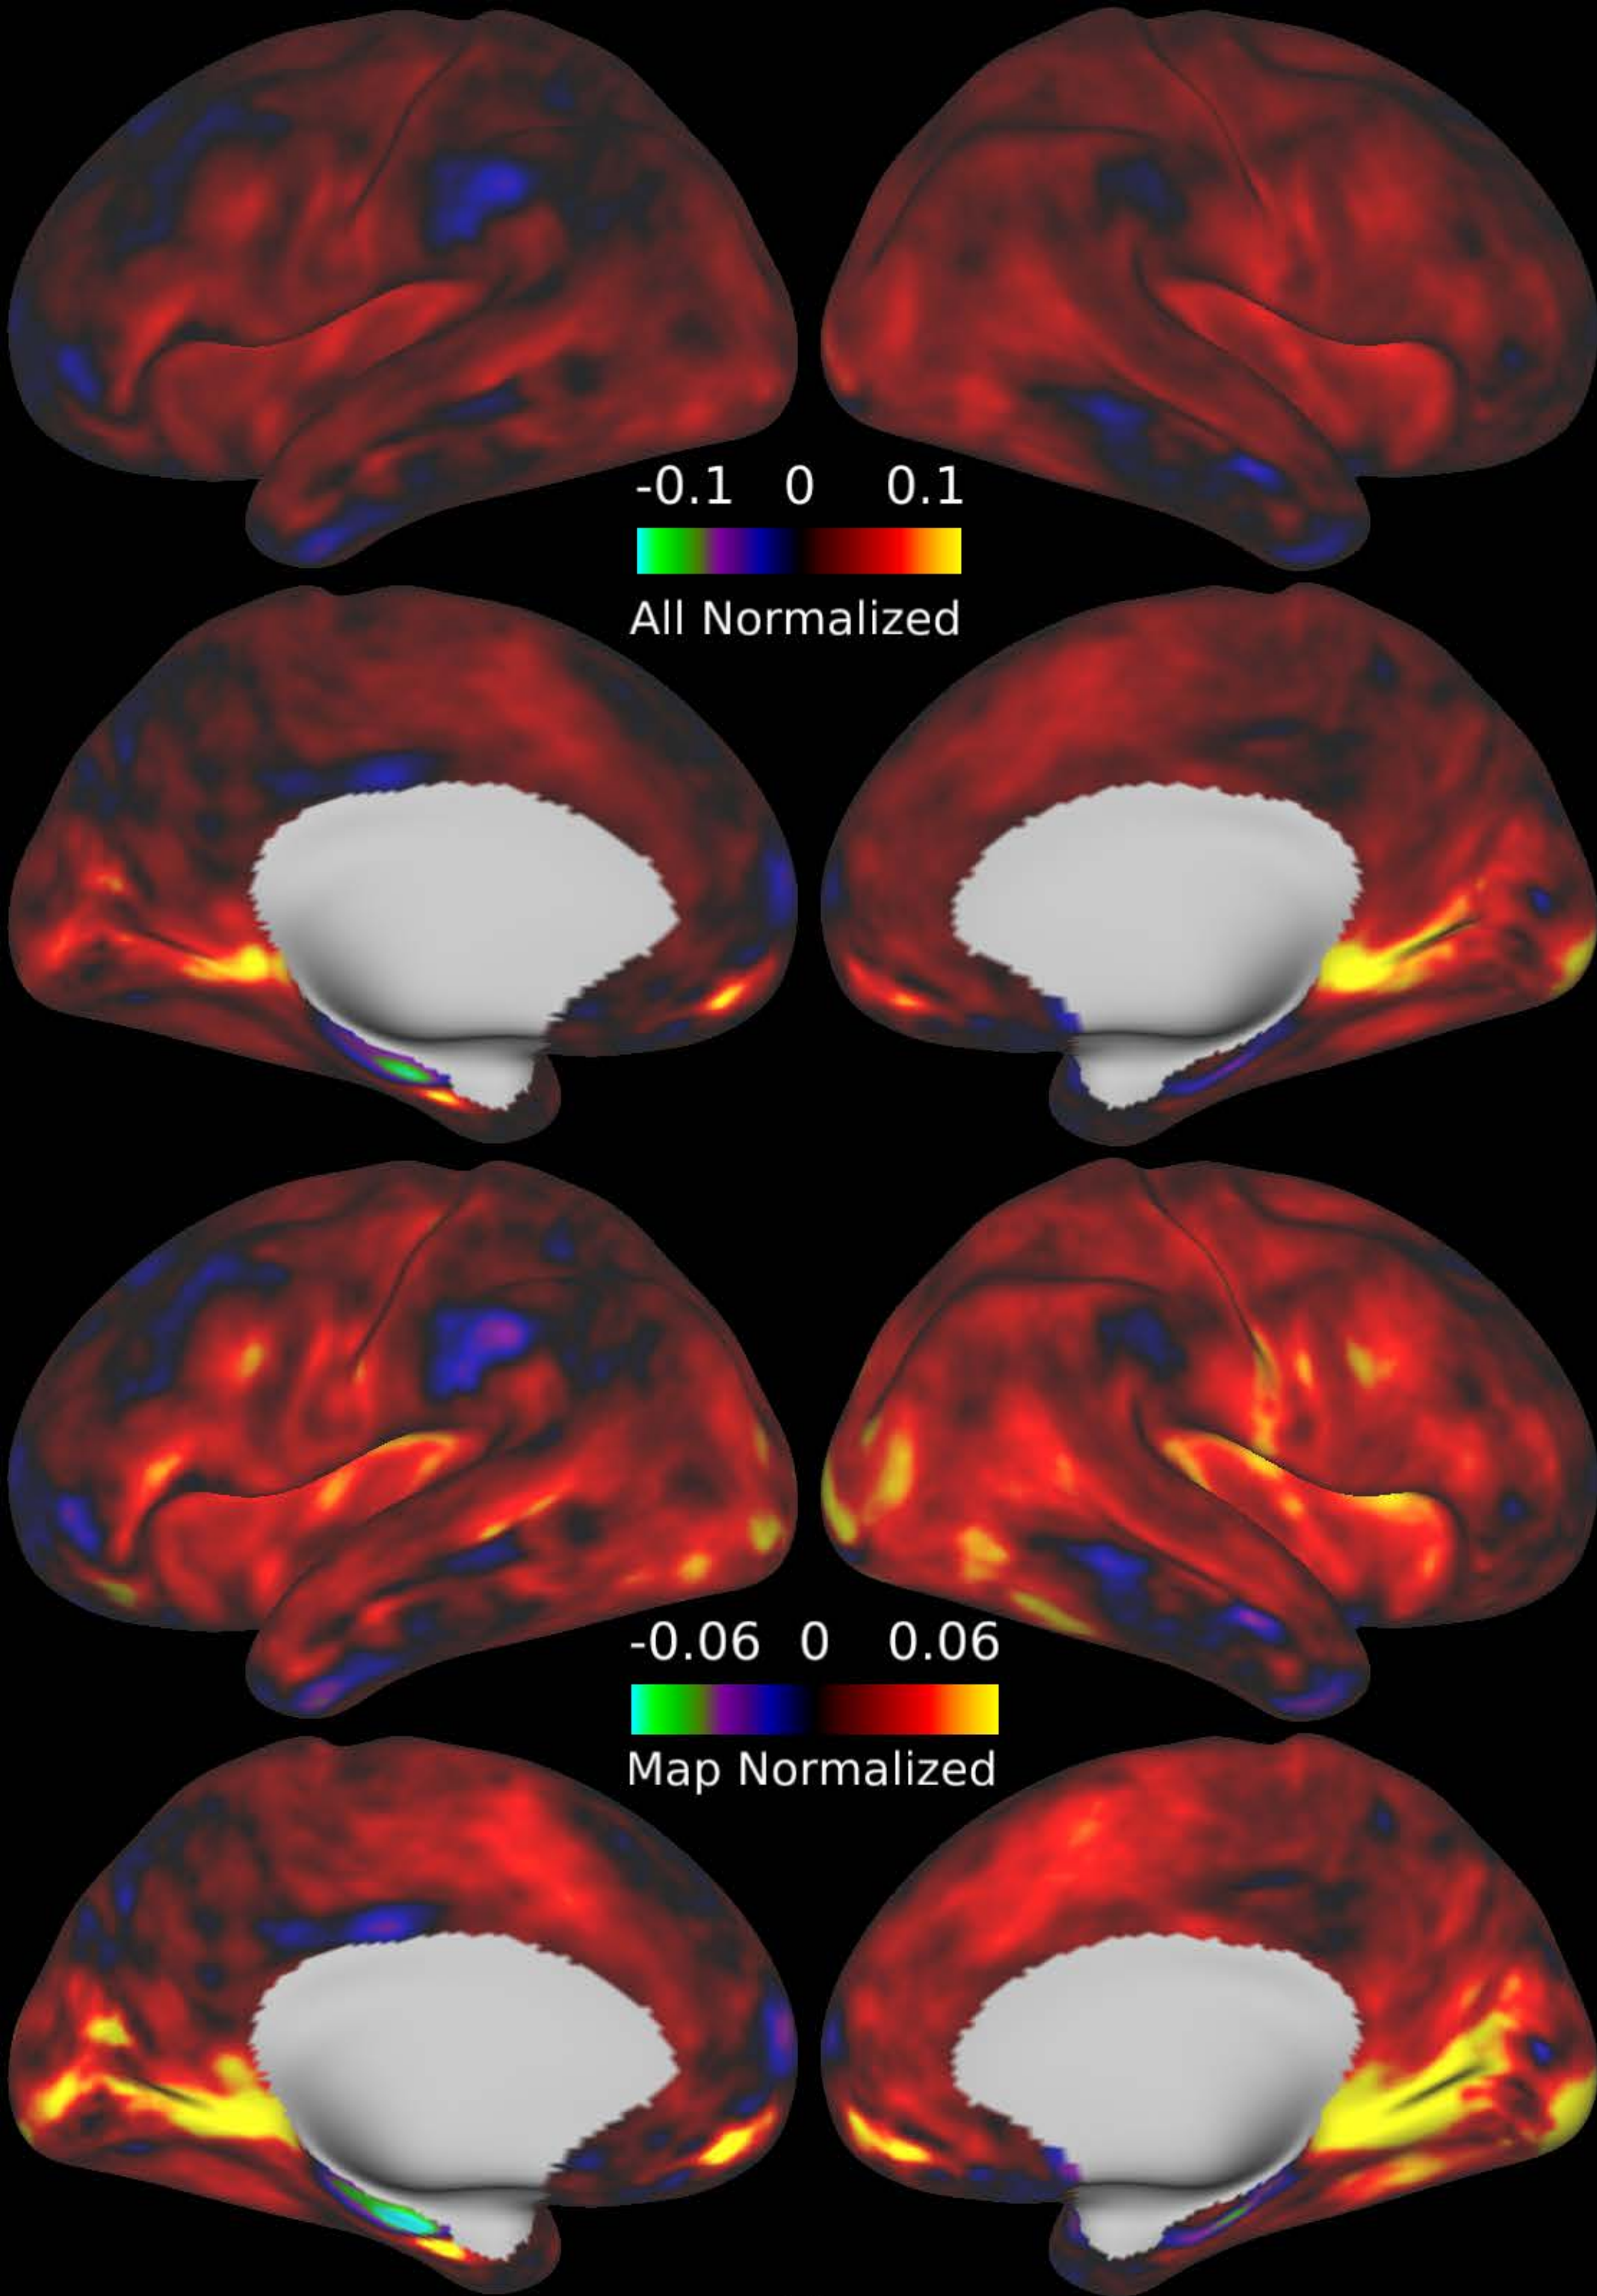

Hertz

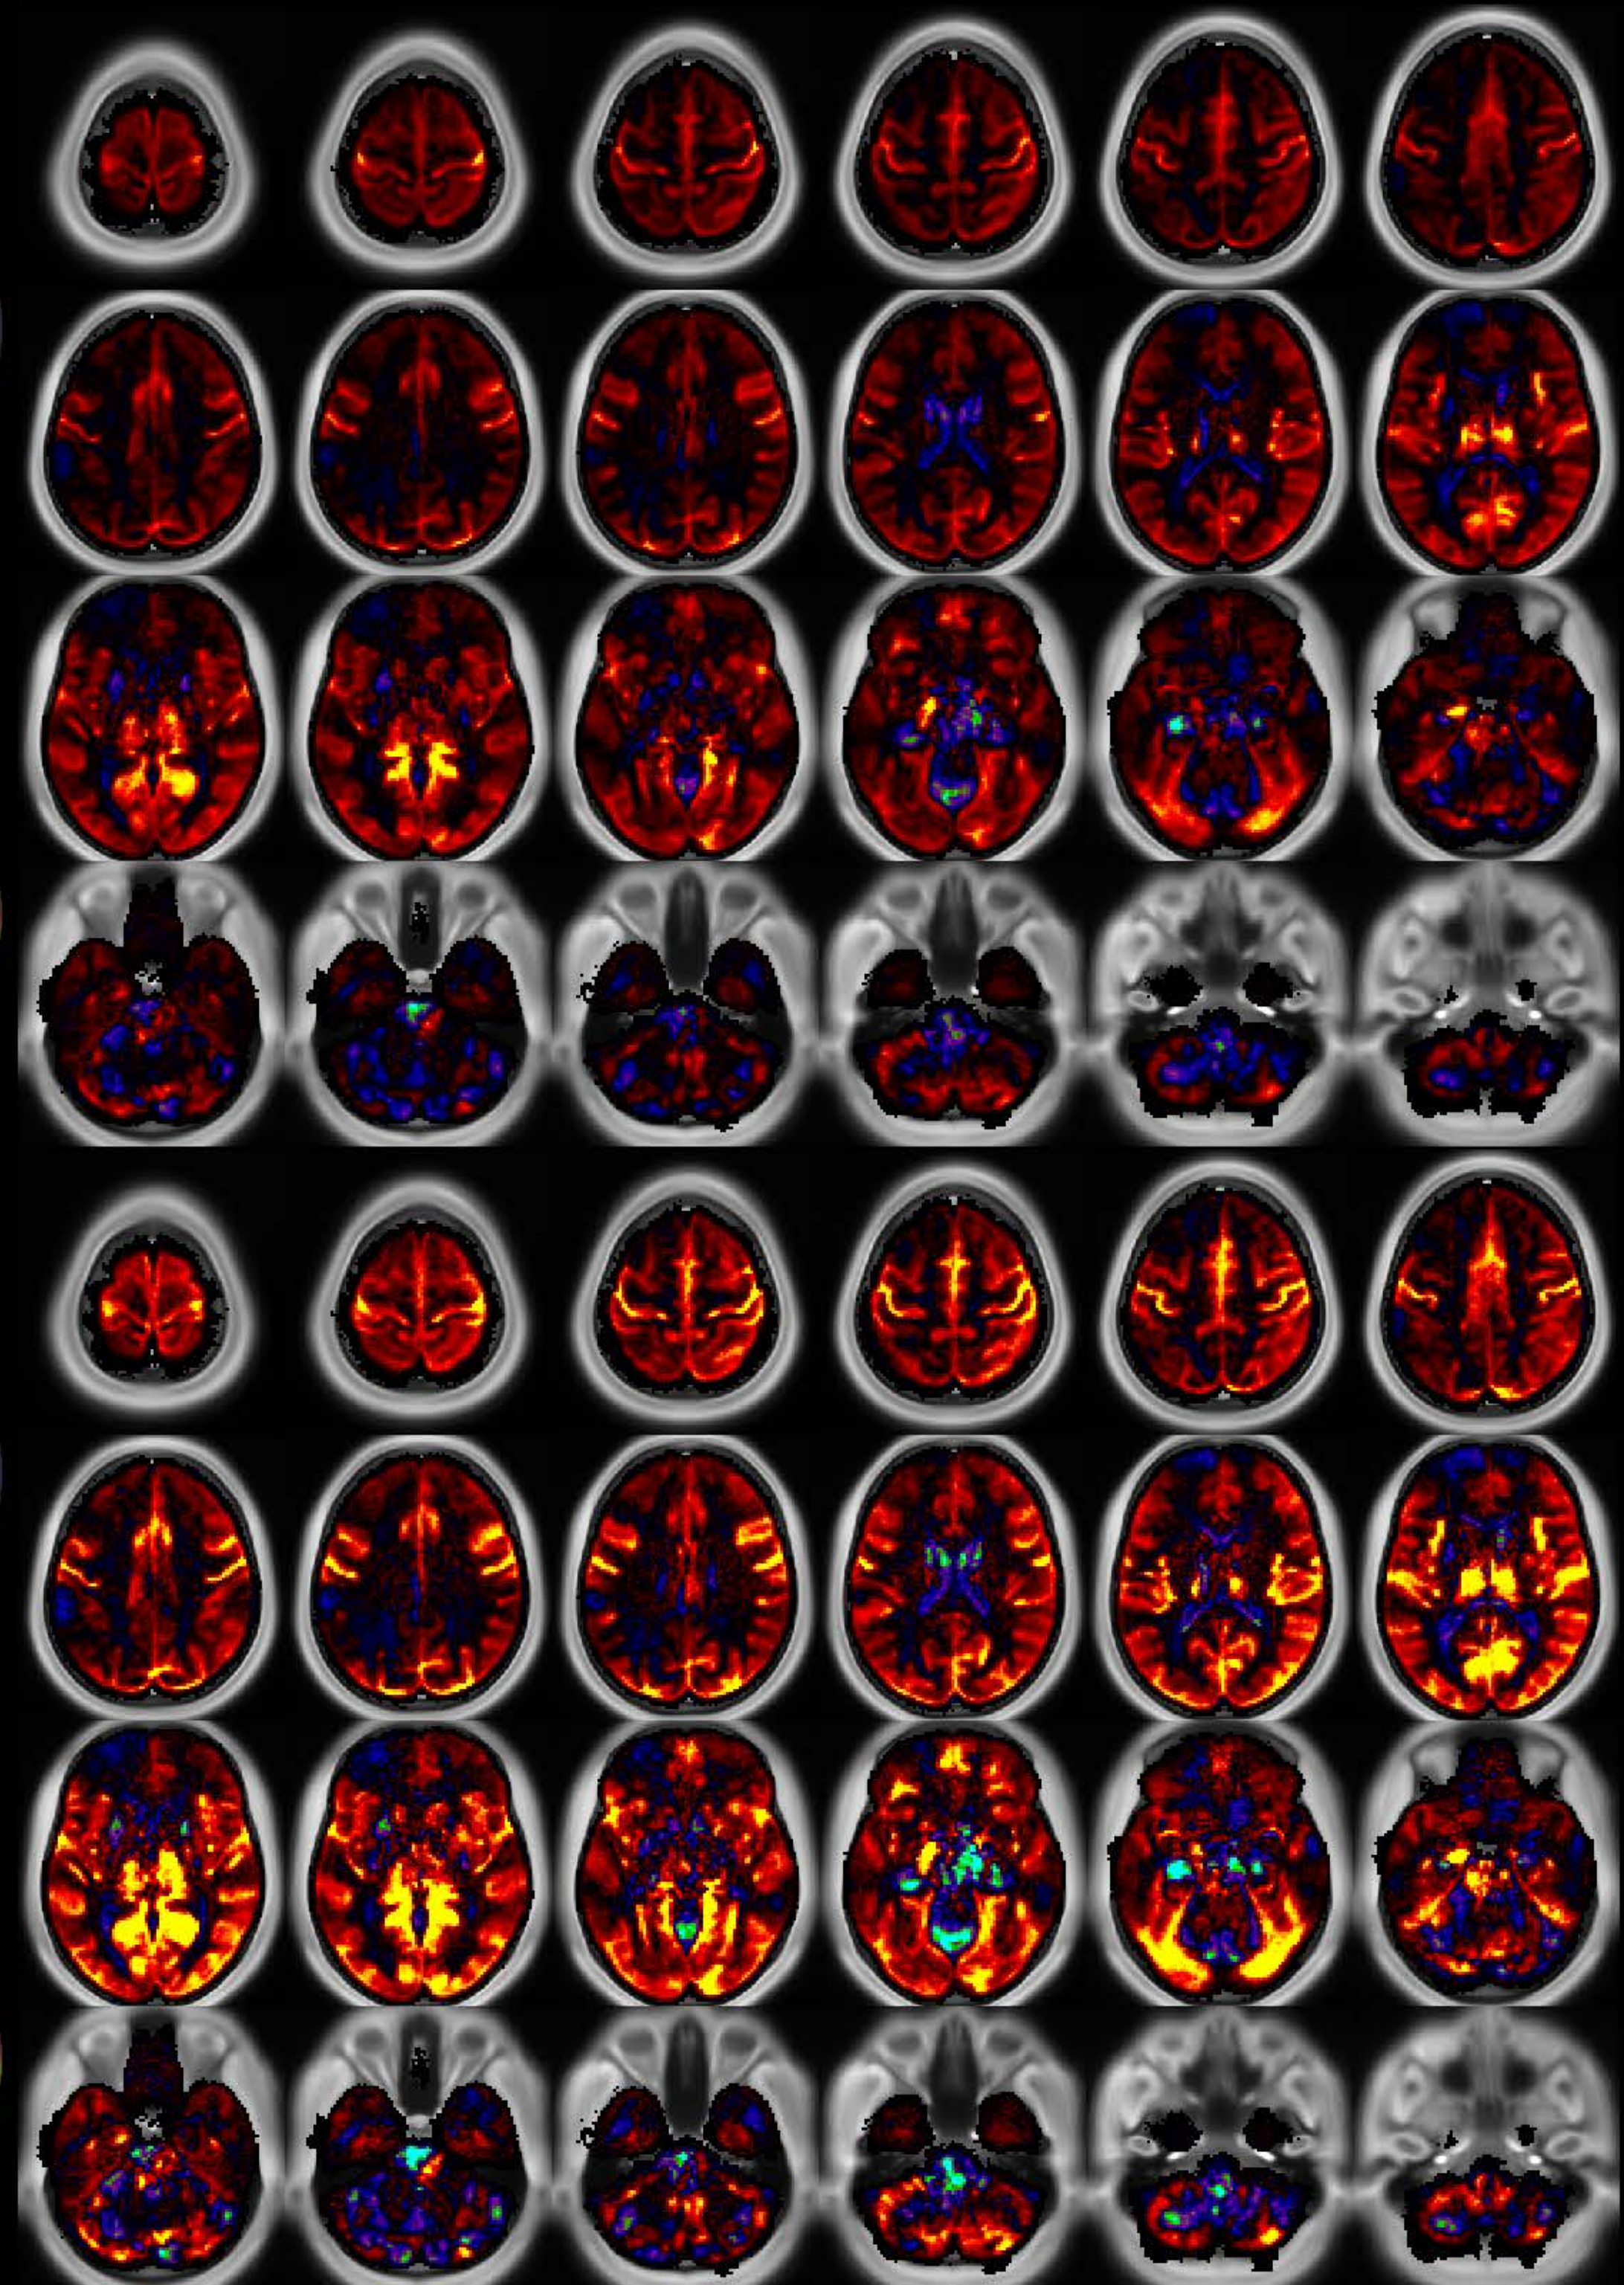

Seconds

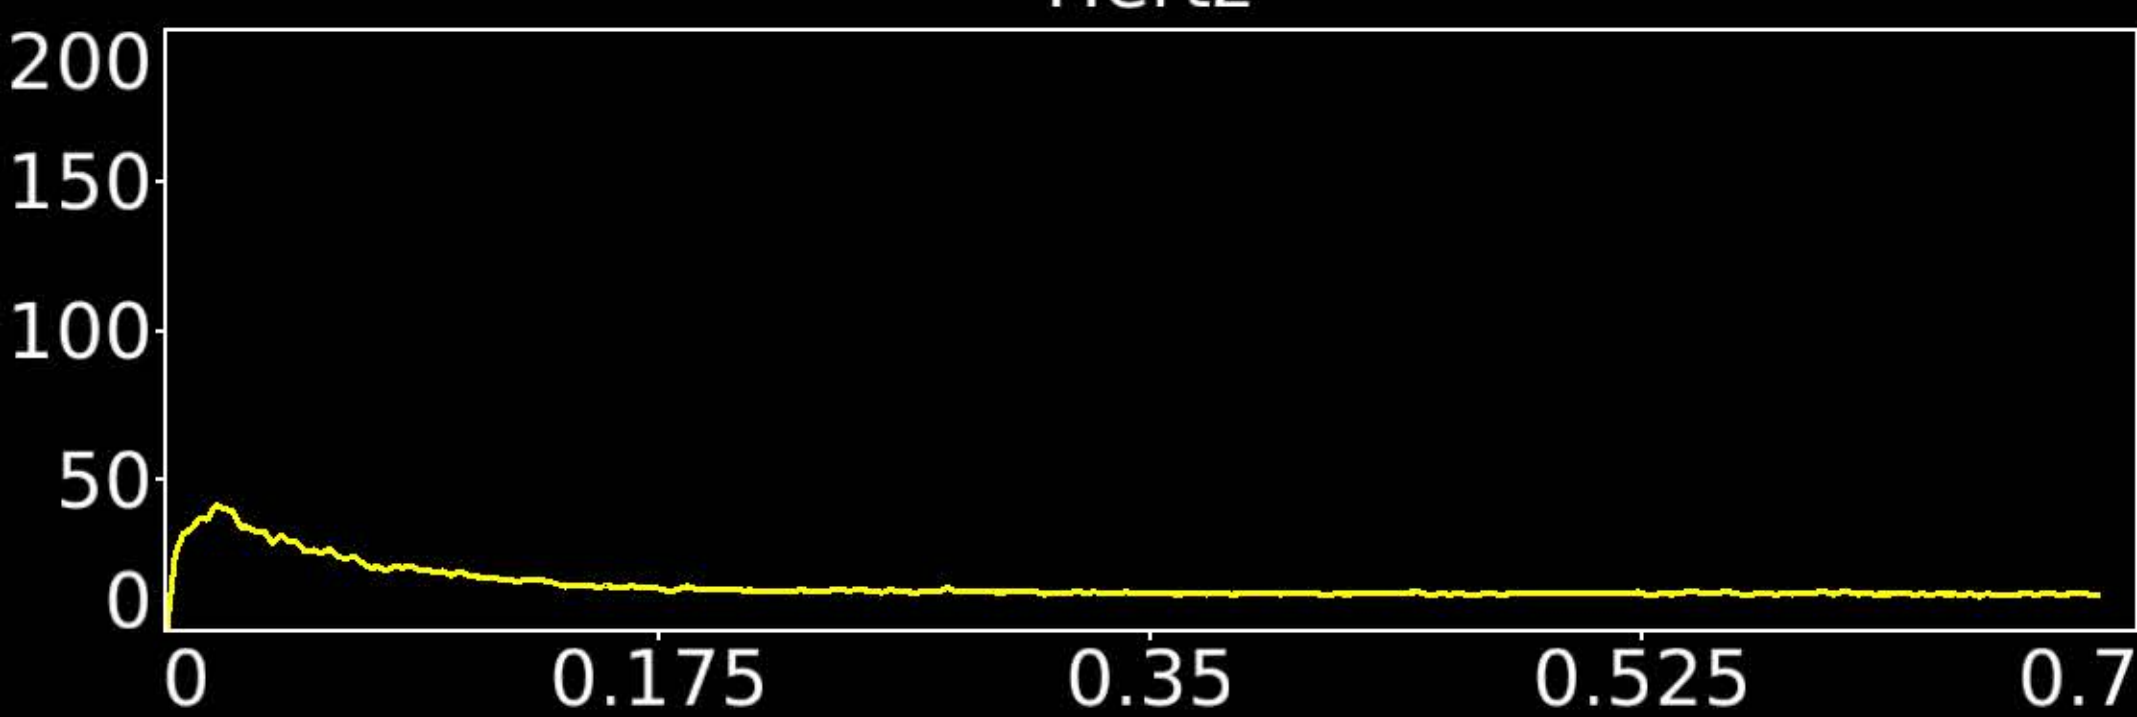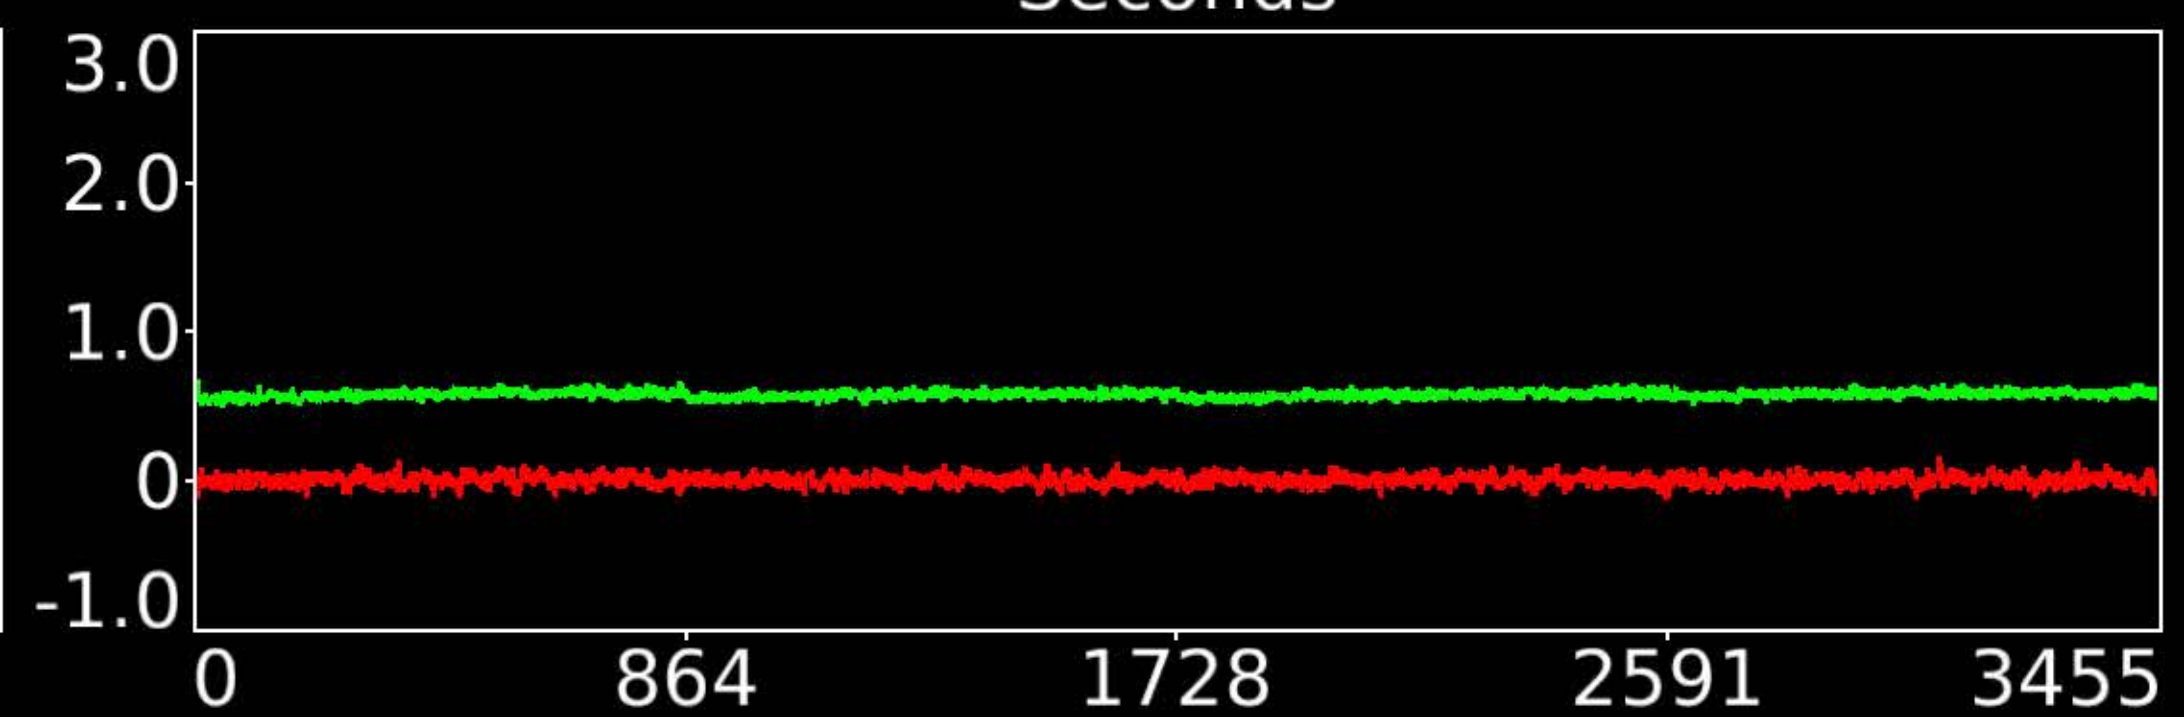

Number & Class: 58 Noise

Name: Subsidiary Global Physiological Noise

RVT Correlated: No

DVARS Dip Associated: No

Cross-Subject Variable: Yes

Single Subject: Yes

% Variance Explained: 0.55

Globality Index: 1.99

Task Component: No

Taskr Component: No

Sleep Noted: Yes

Rationale: Single subject component with high correlation to global timecourse



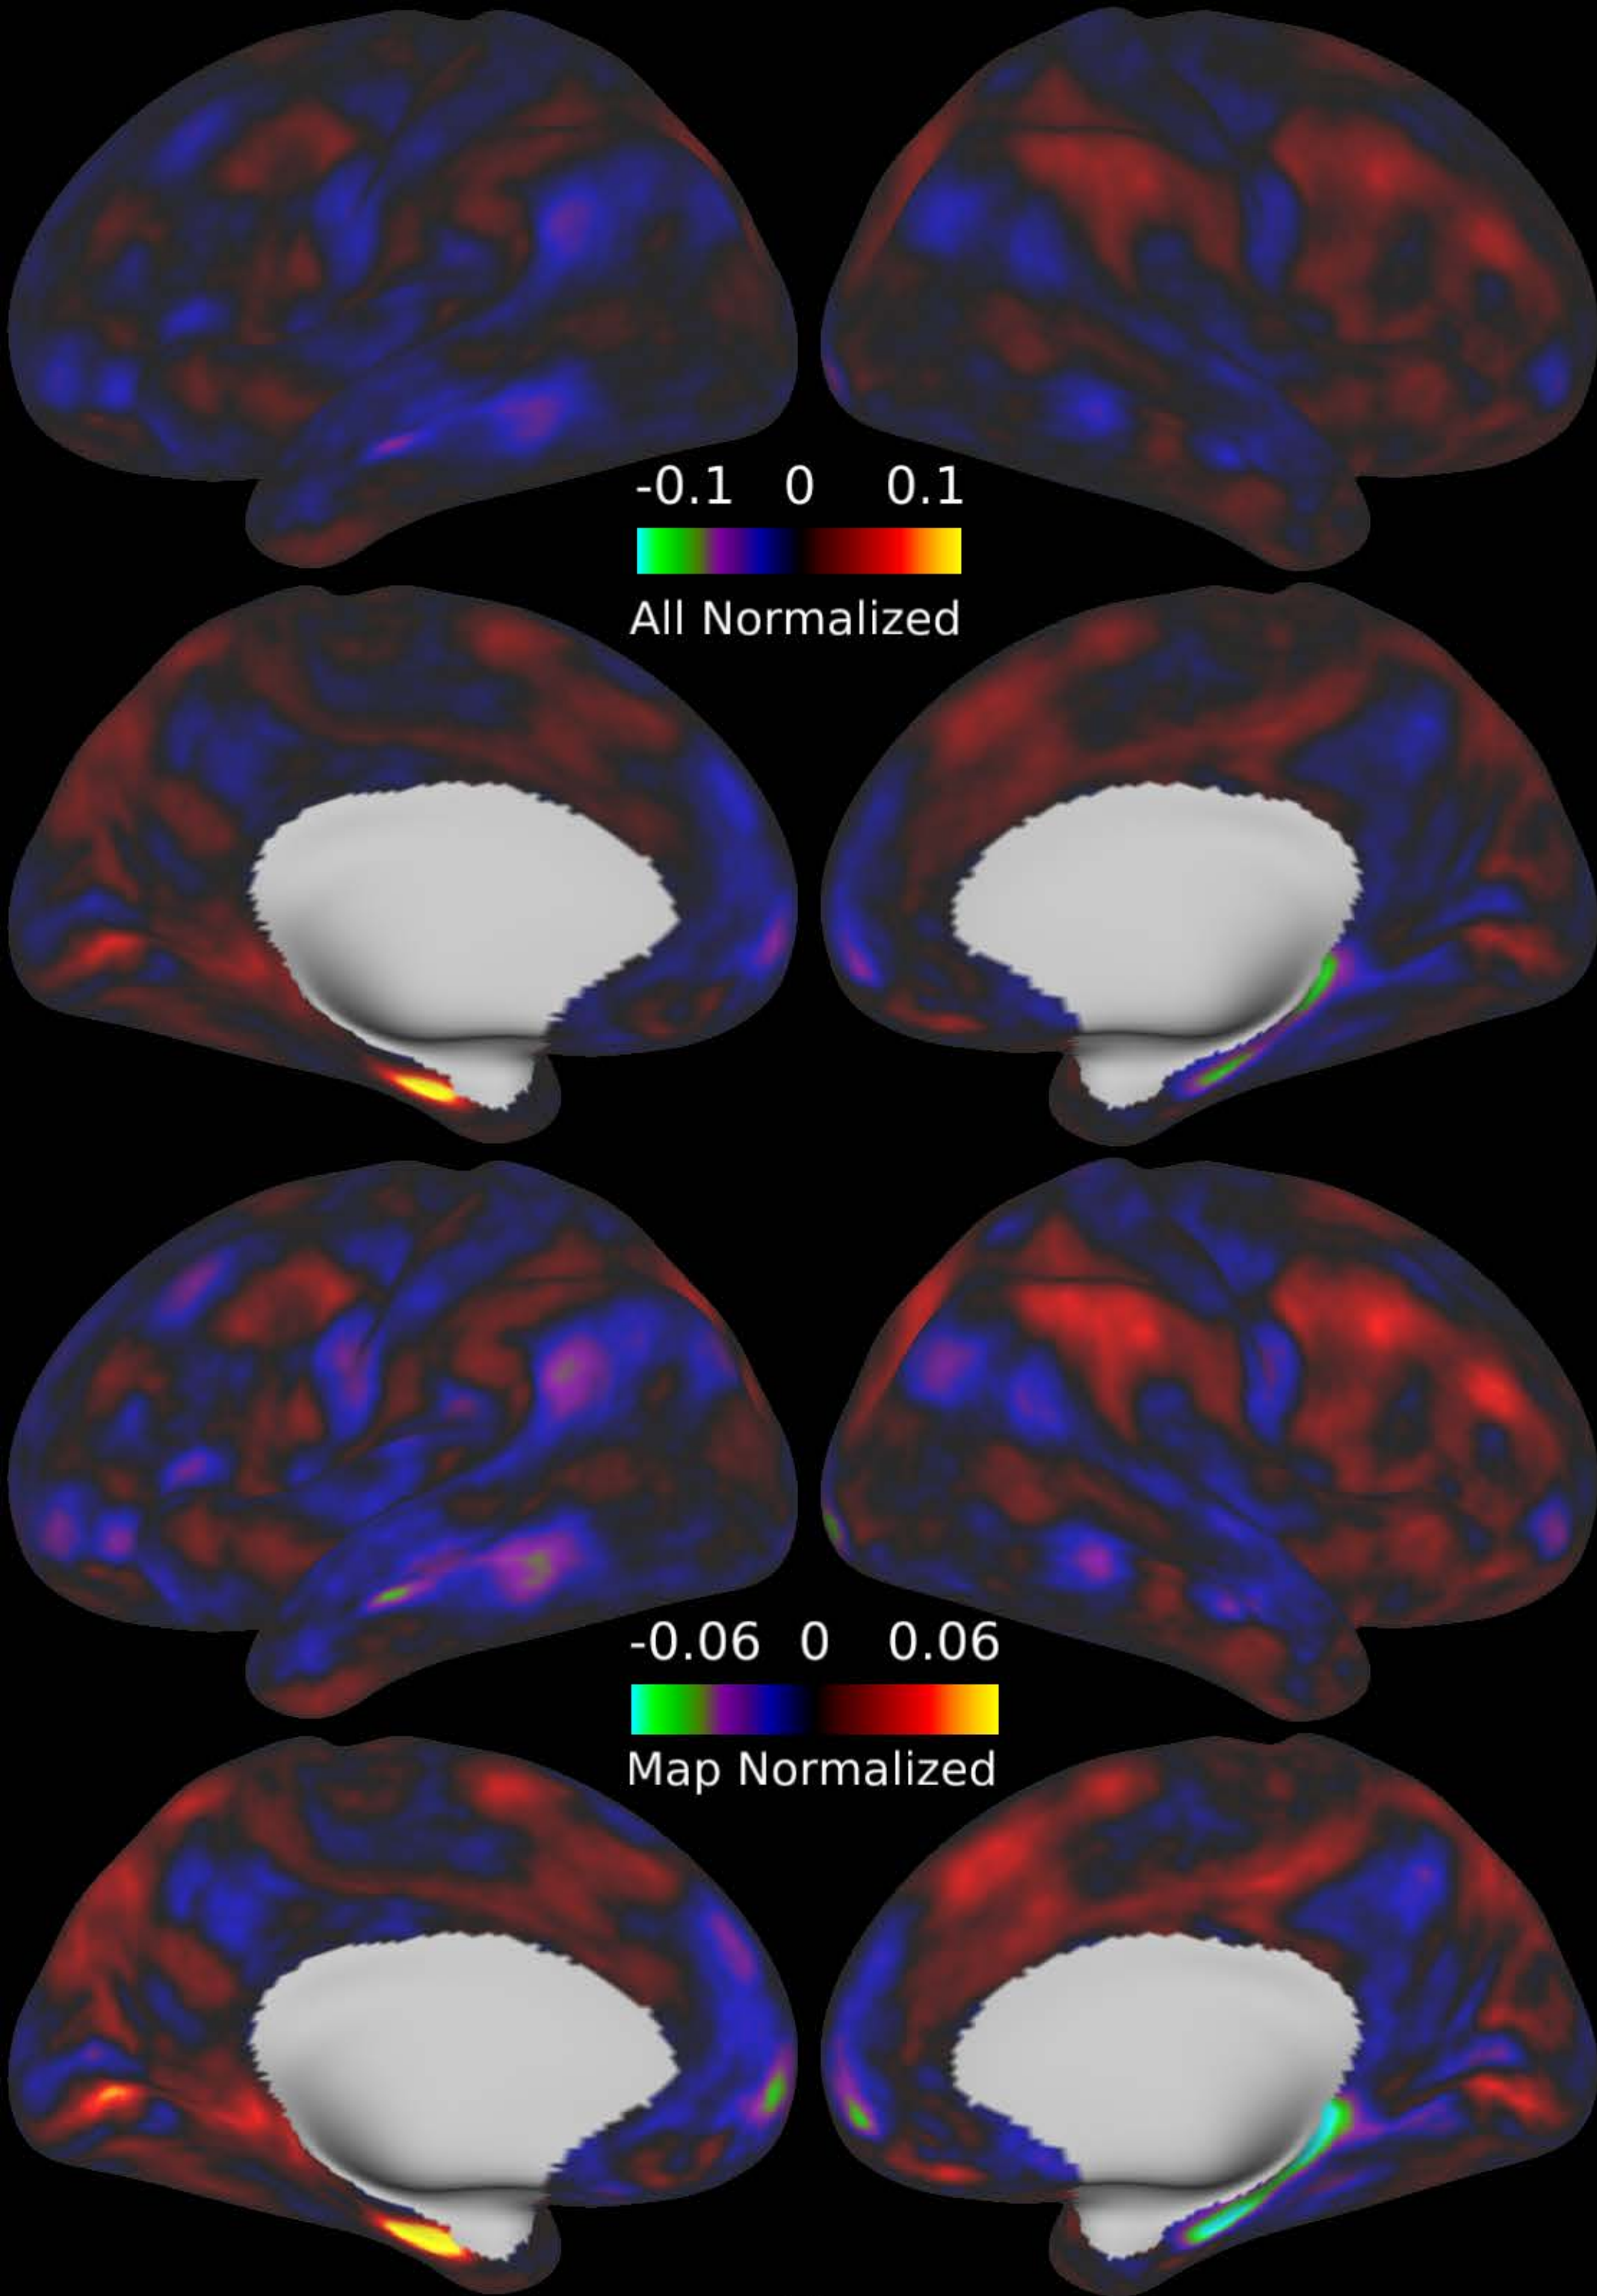

Hertz

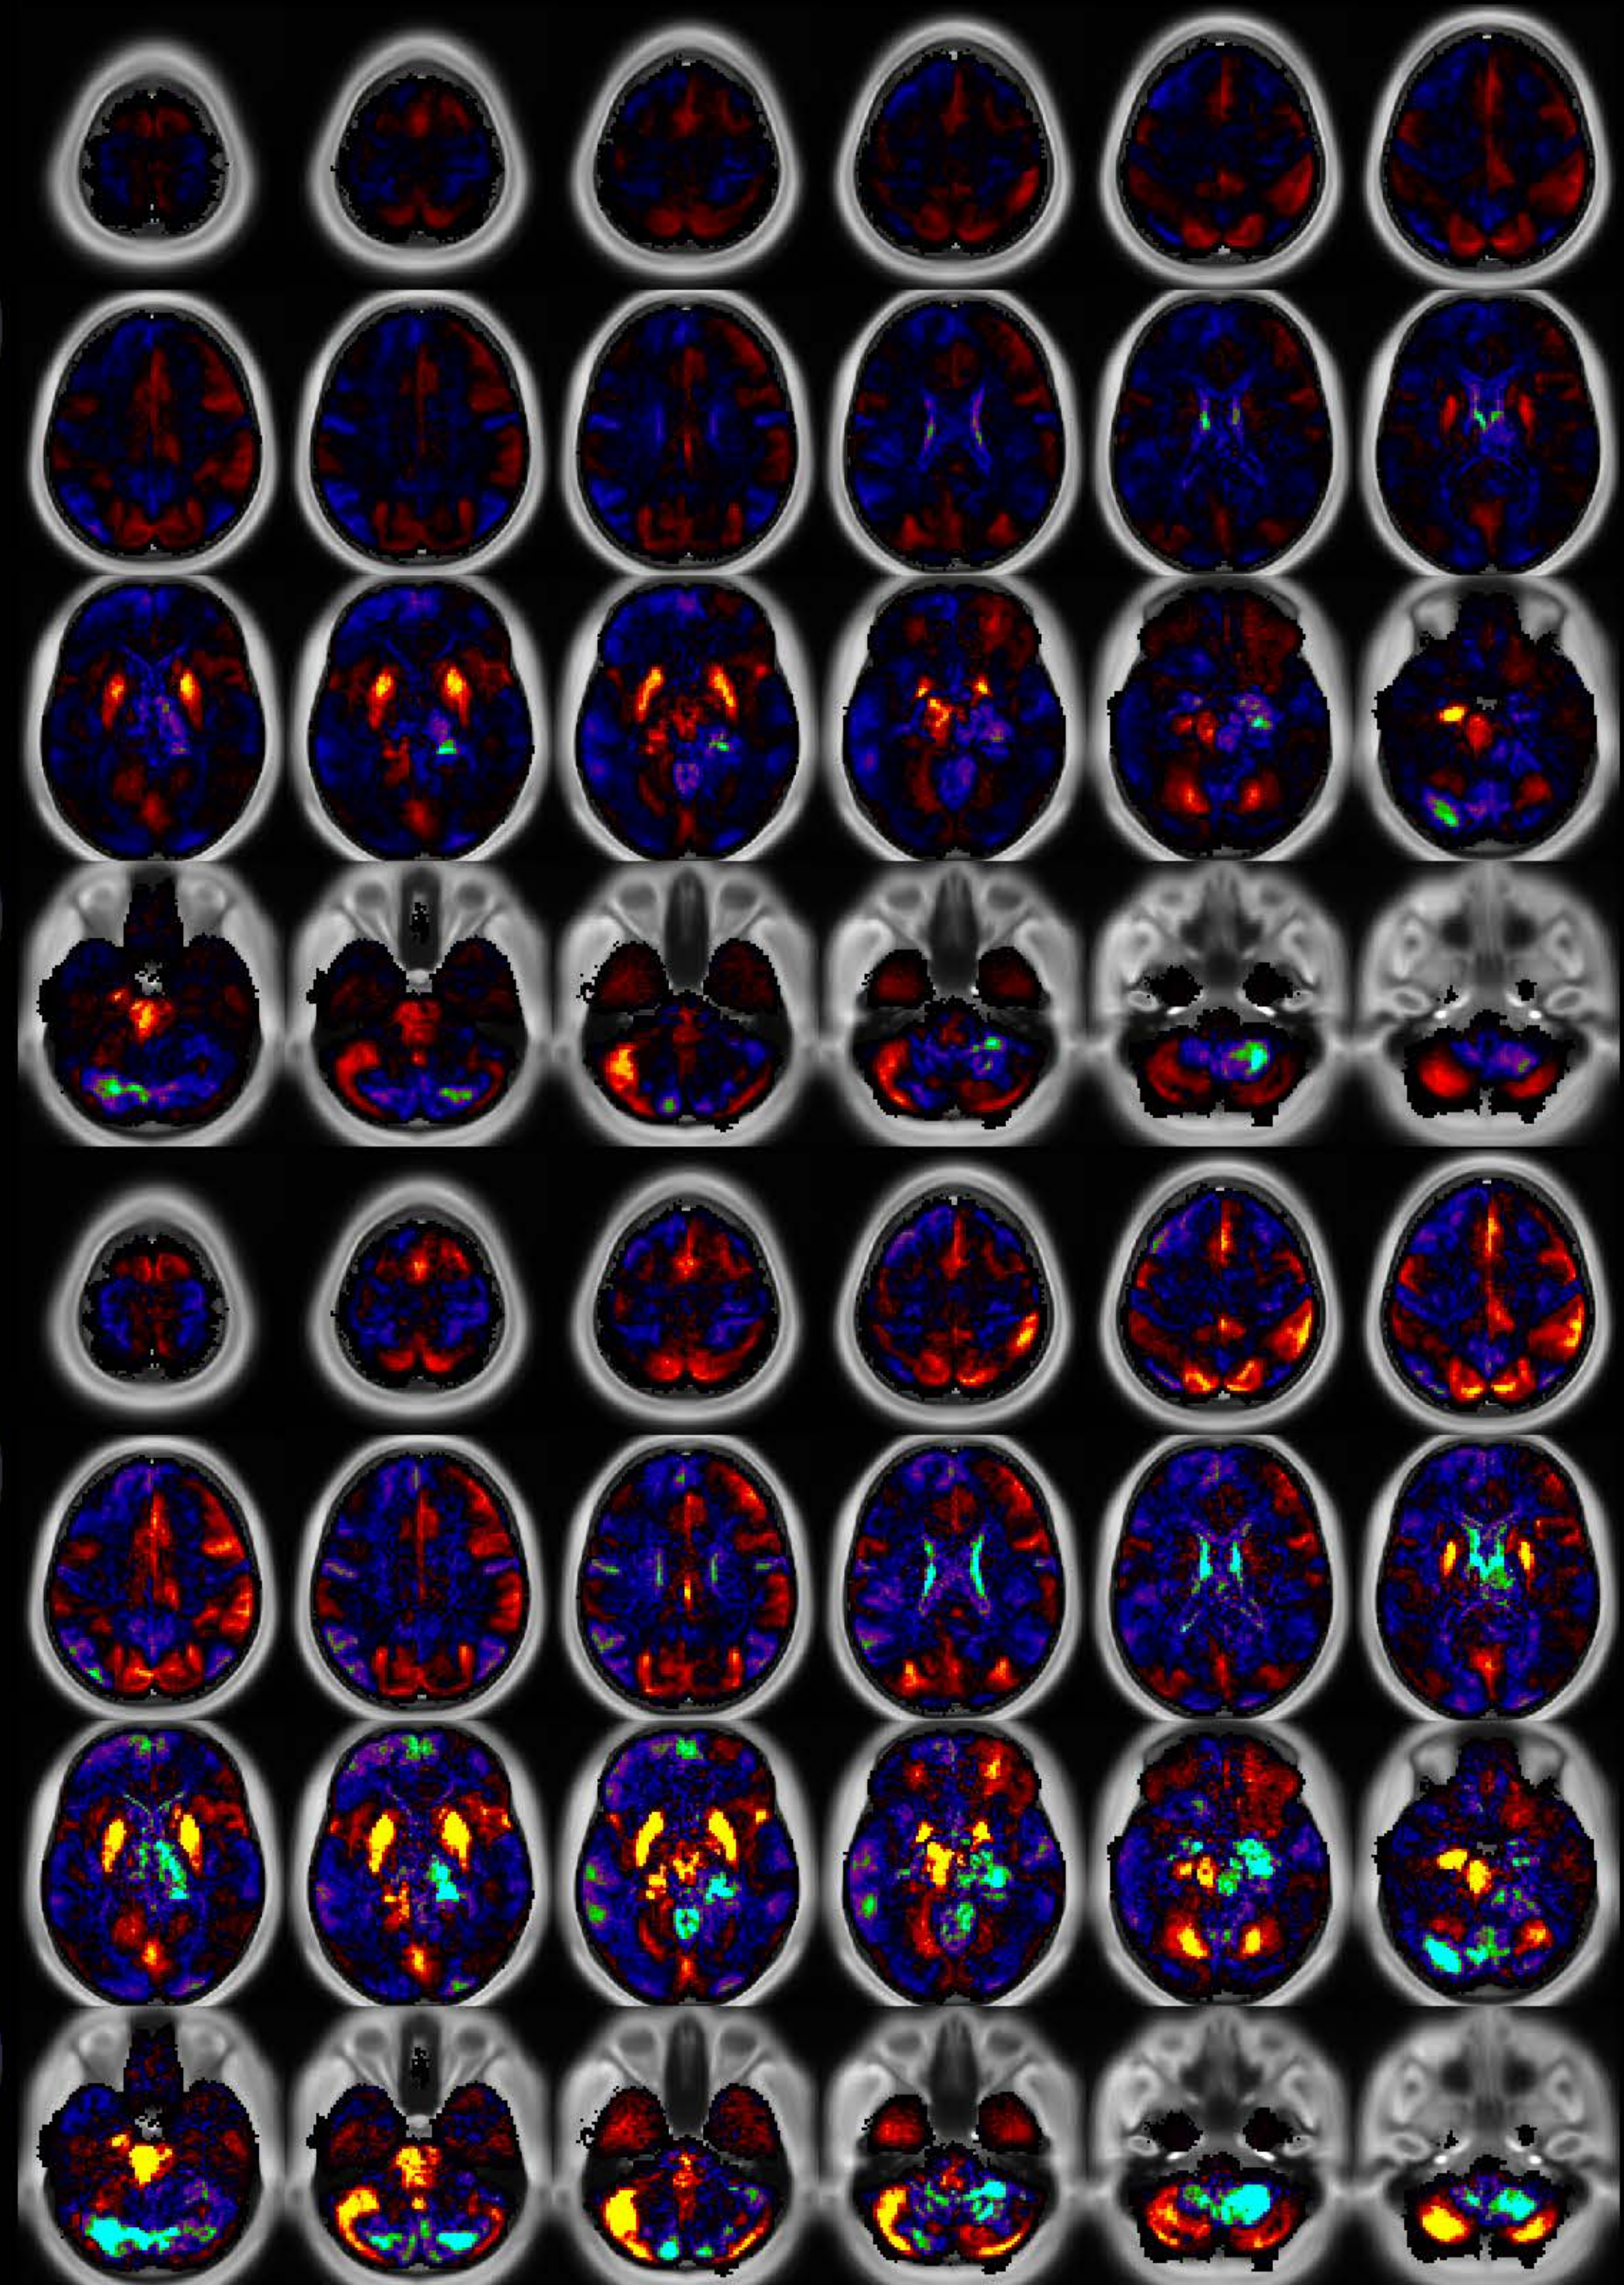

Seconds

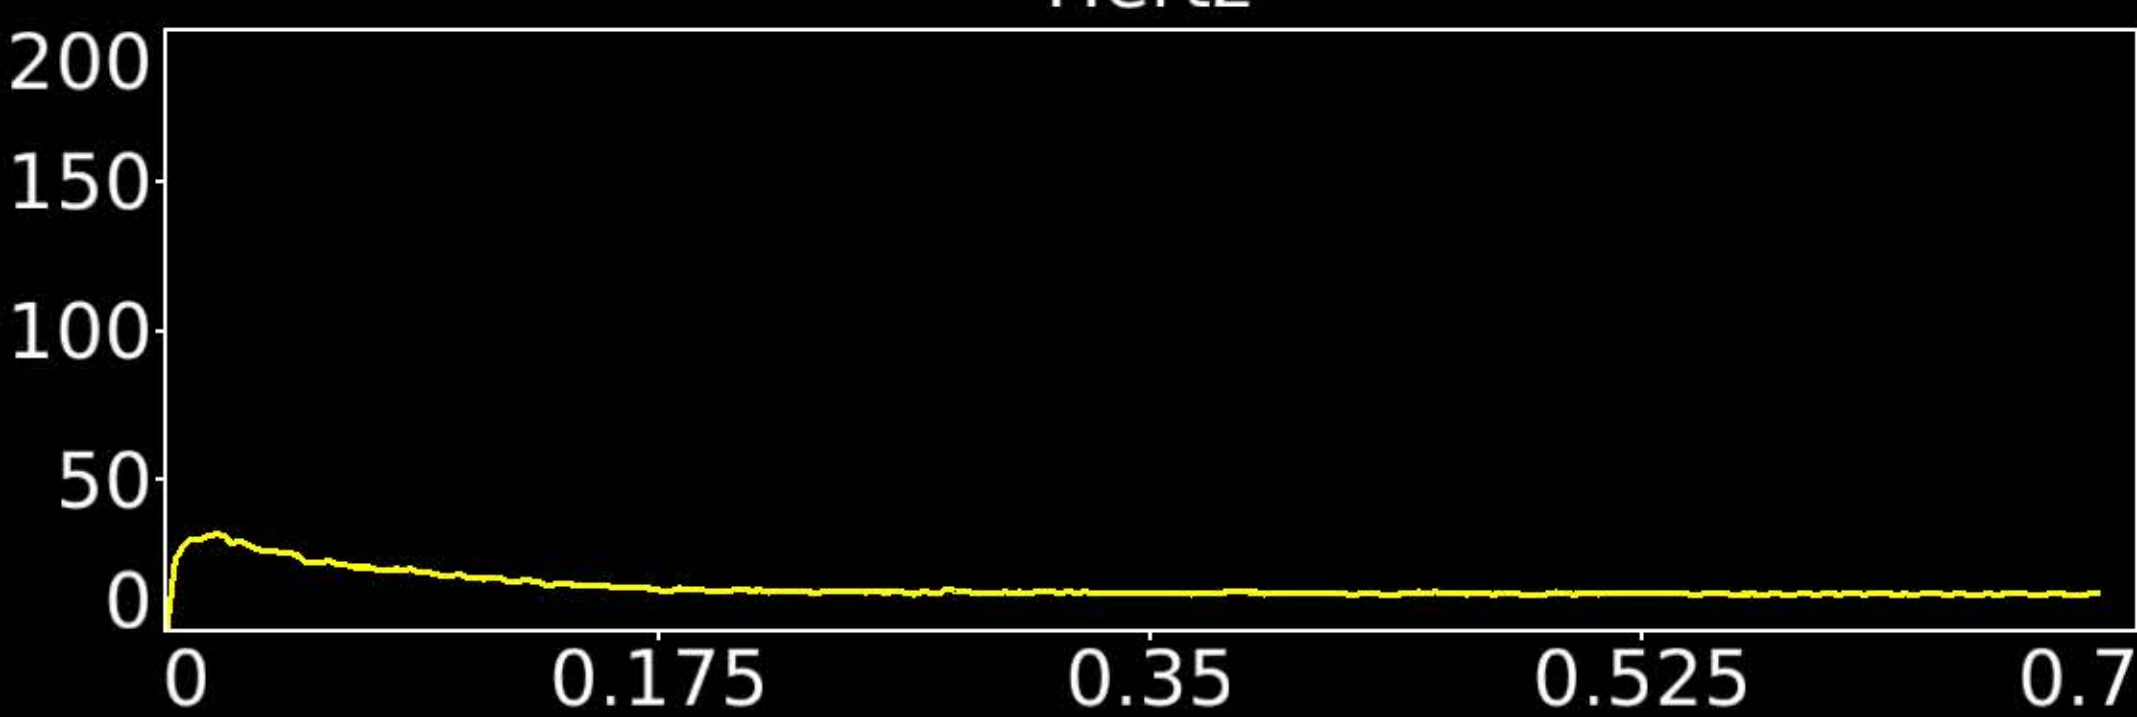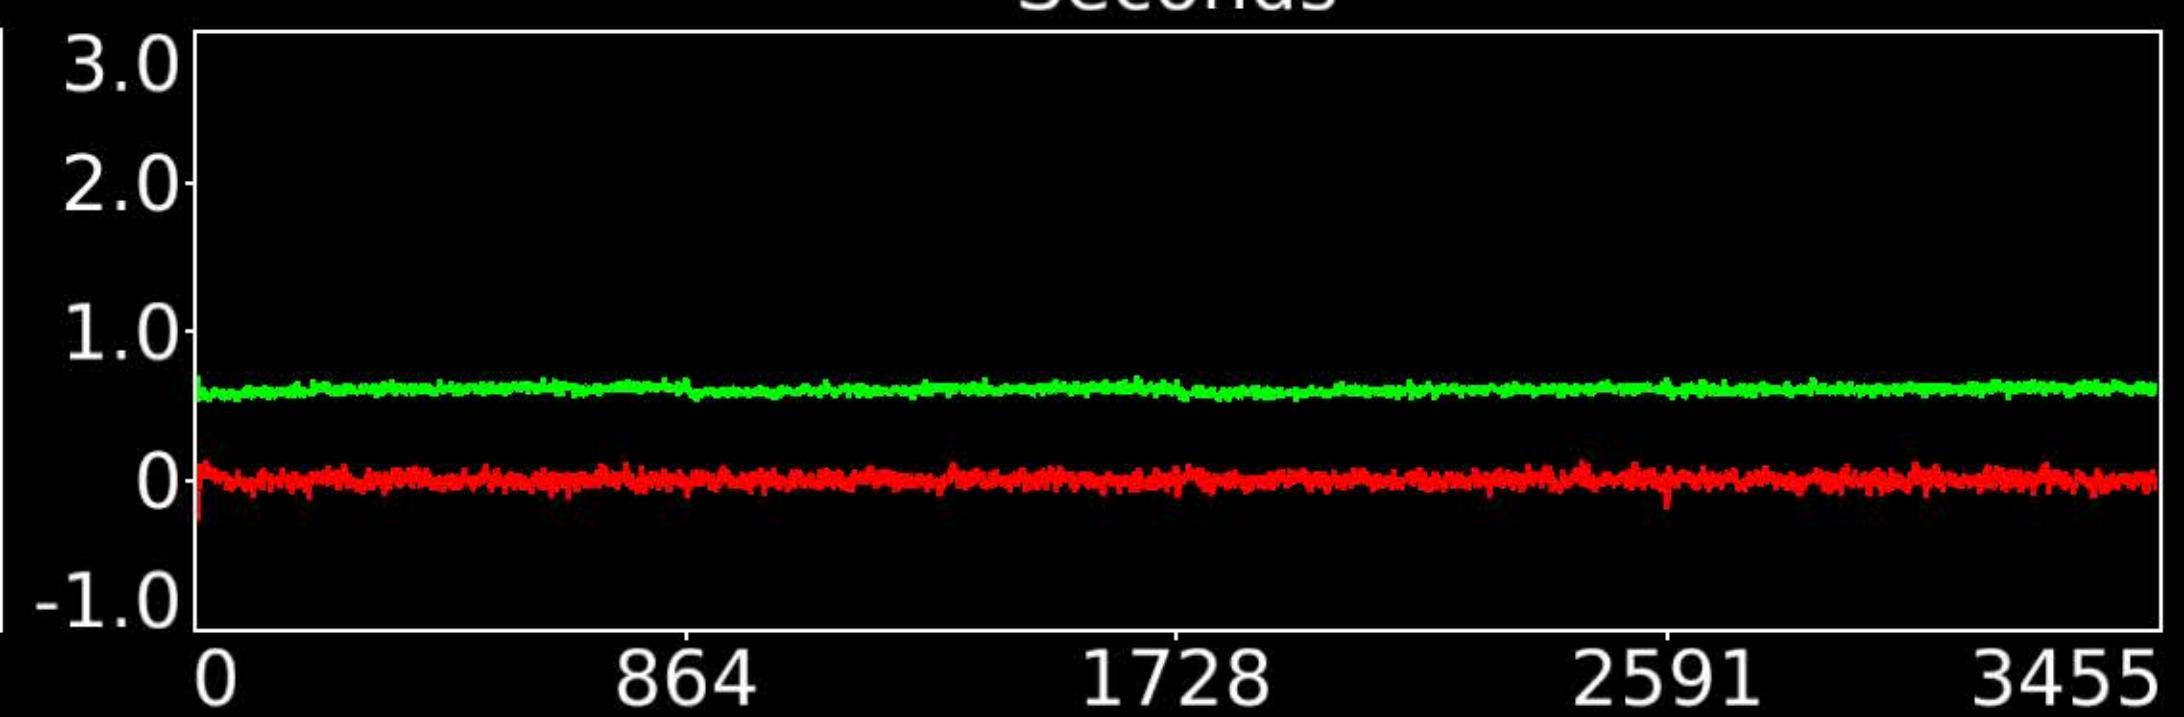

|                                                                                |                            |                                                 |  |
|--------------------------------------------------------------------------------|----------------------------|-------------------------------------------------|--|
| Number & Class: 59 Noise                                                       |                            | Name: Single Subject Global Physiological Noise |  |
| RVT Correlated: No                                                             | DVARS Dip Associated: No   | Cross-Subject Variable: No                      |  |
| Single Subject: Yes                                                            | % Variance Explained: 0.56 | Globality Index: 0.13                           |  |
| Task Component: No                                                             | Taskr Component: No        | Sleep Noted: No                                 |  |
| Rationale: Single subject component with high correlation to global timecourse |                            |                                                 |  |



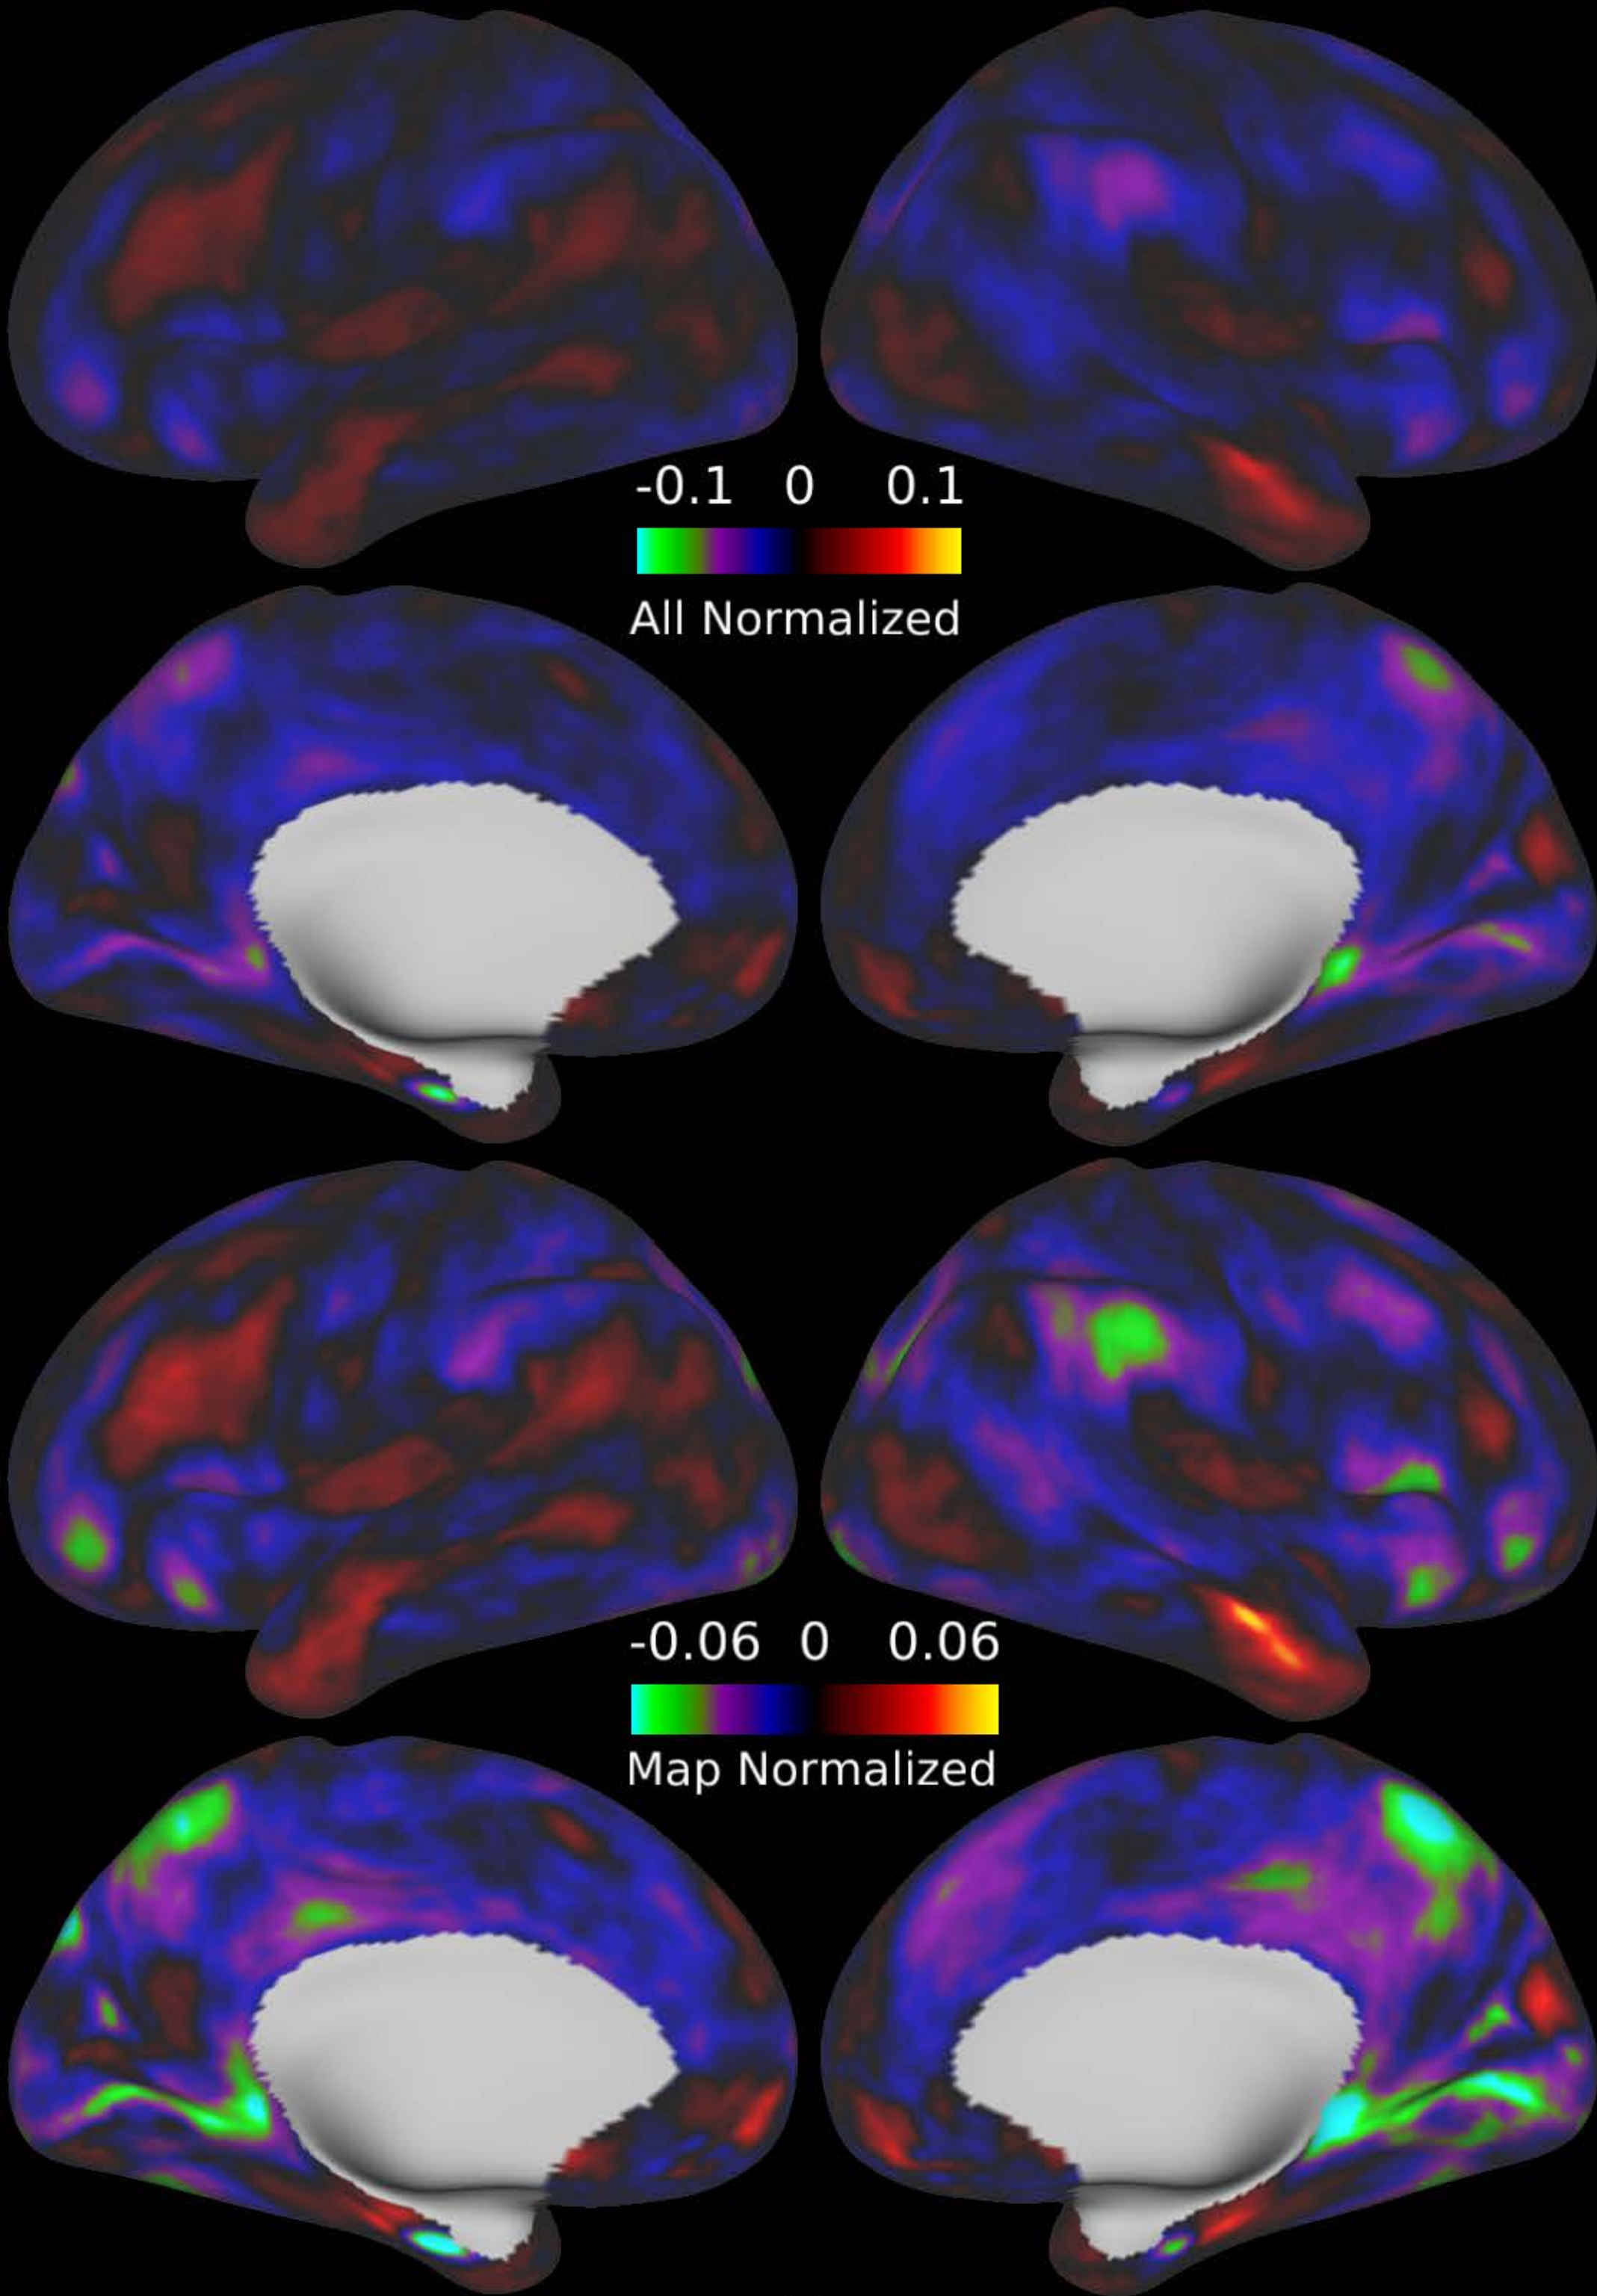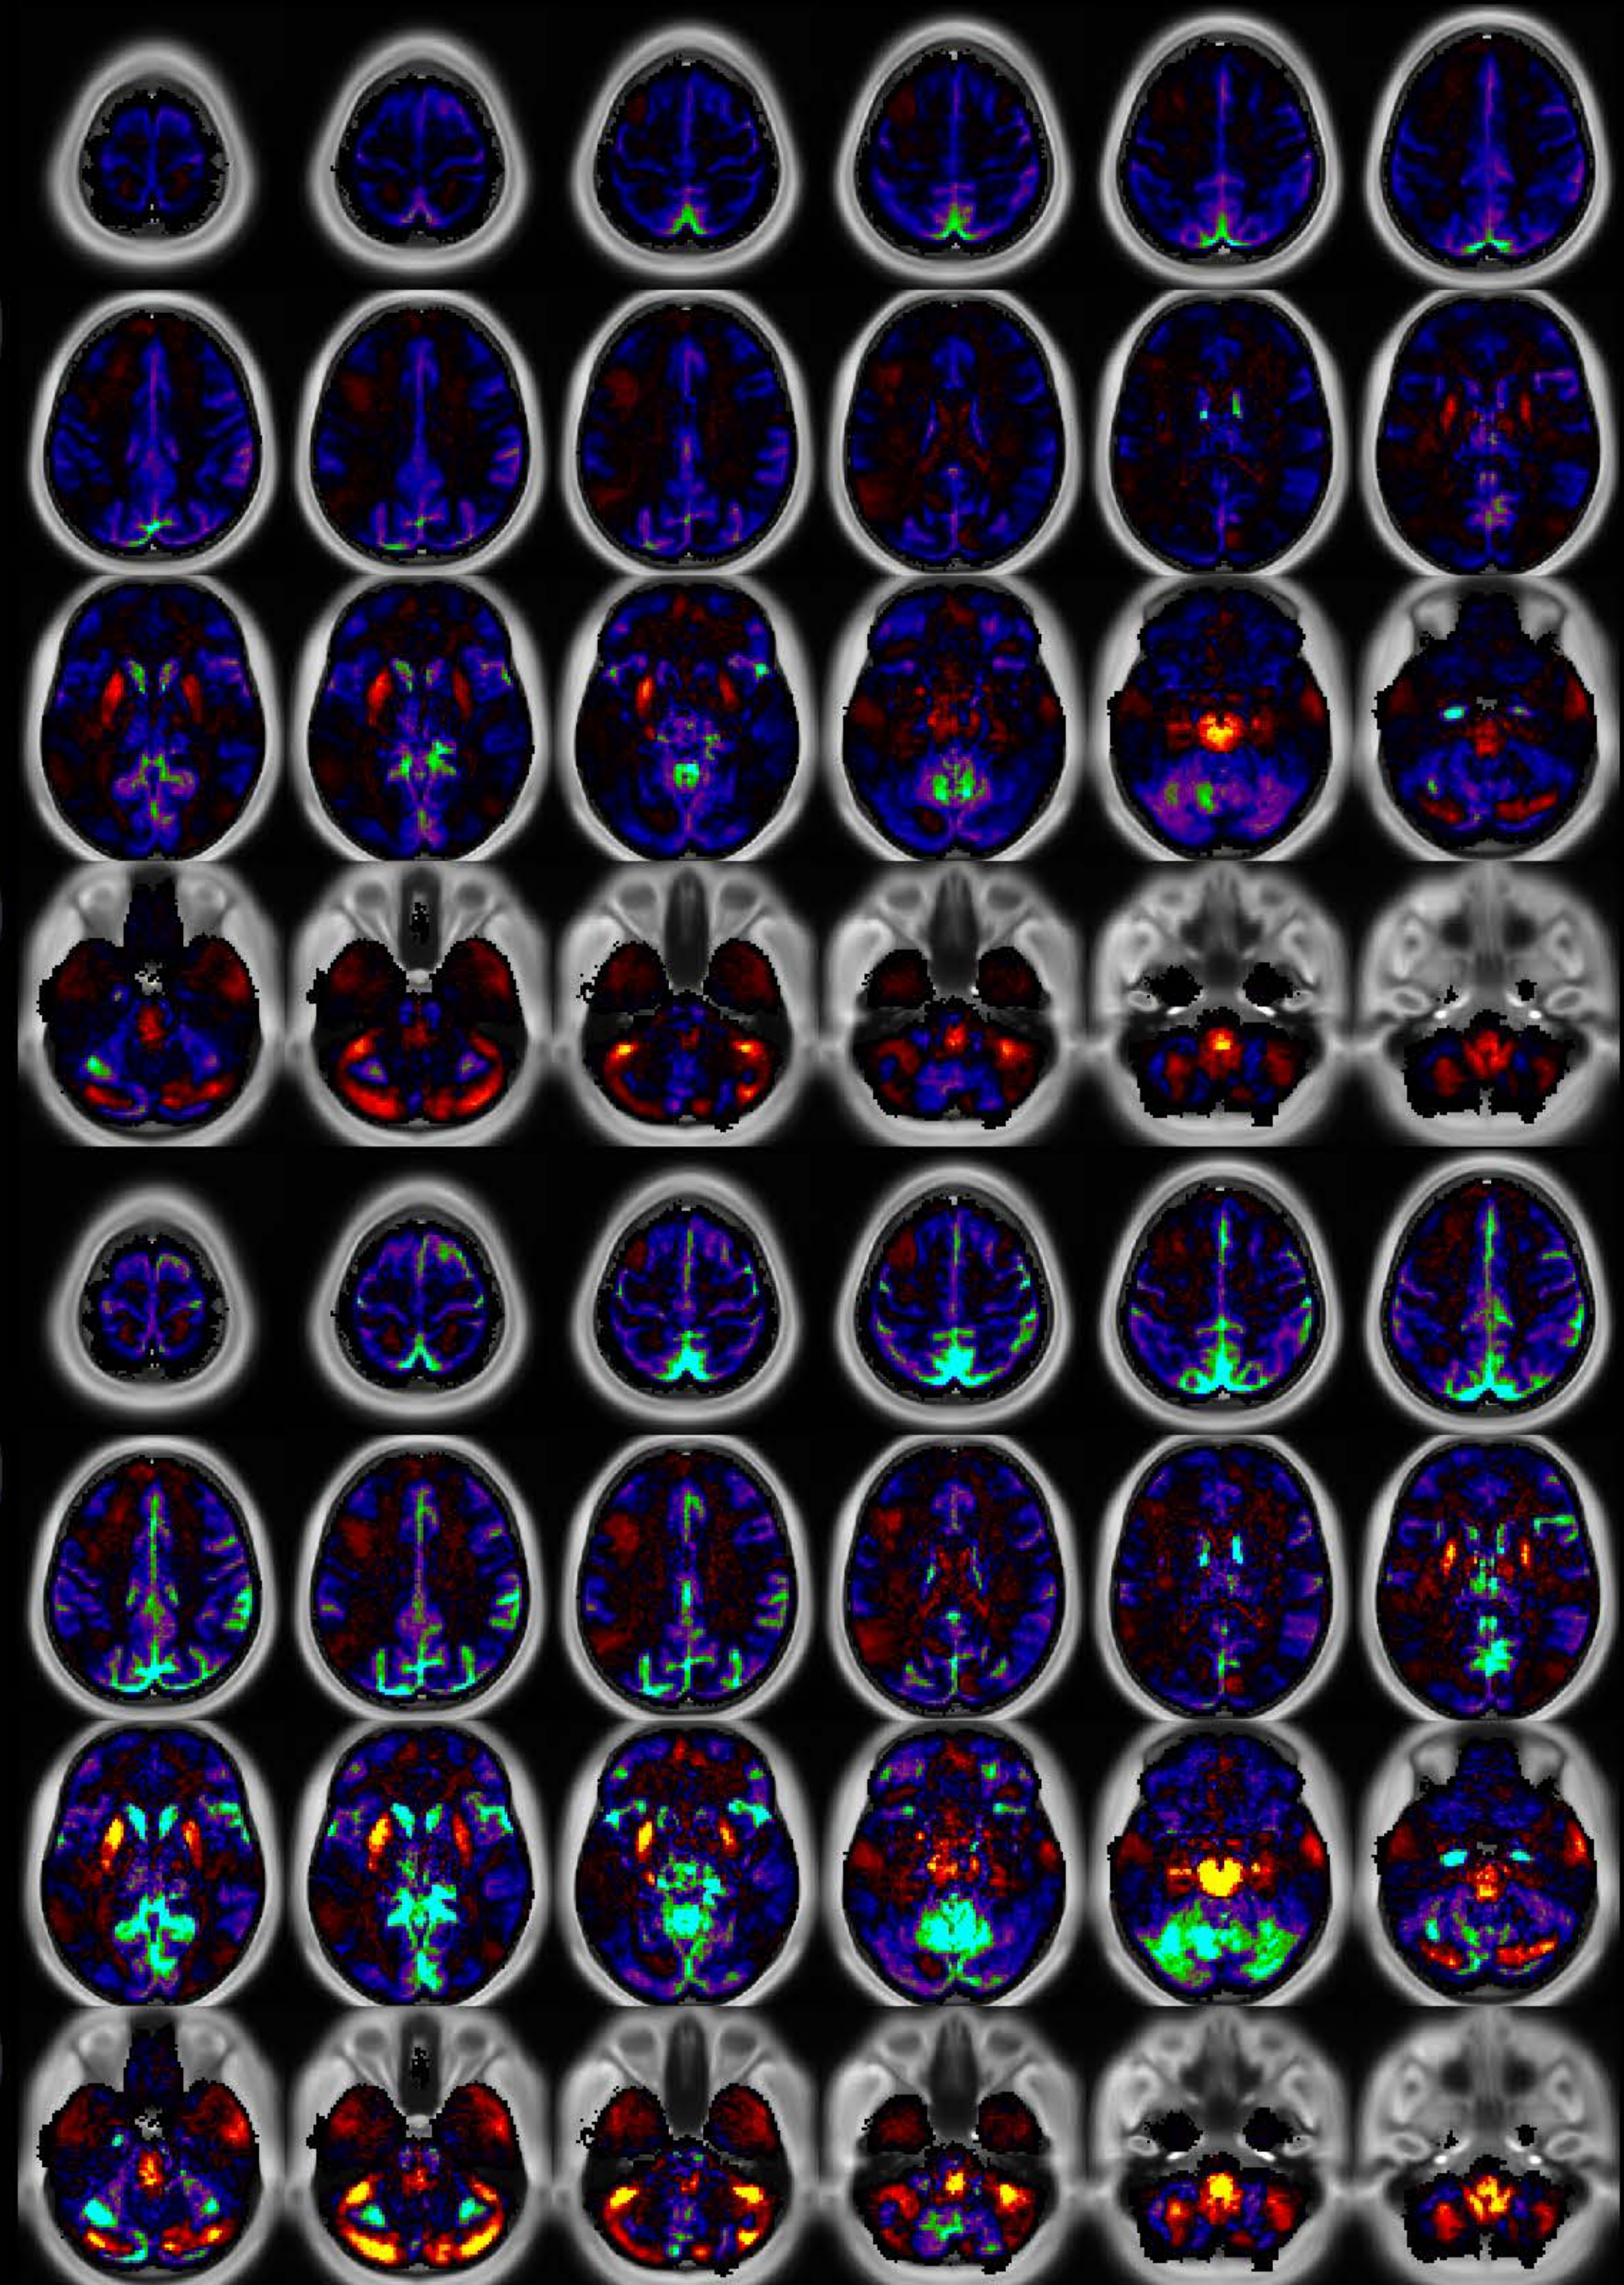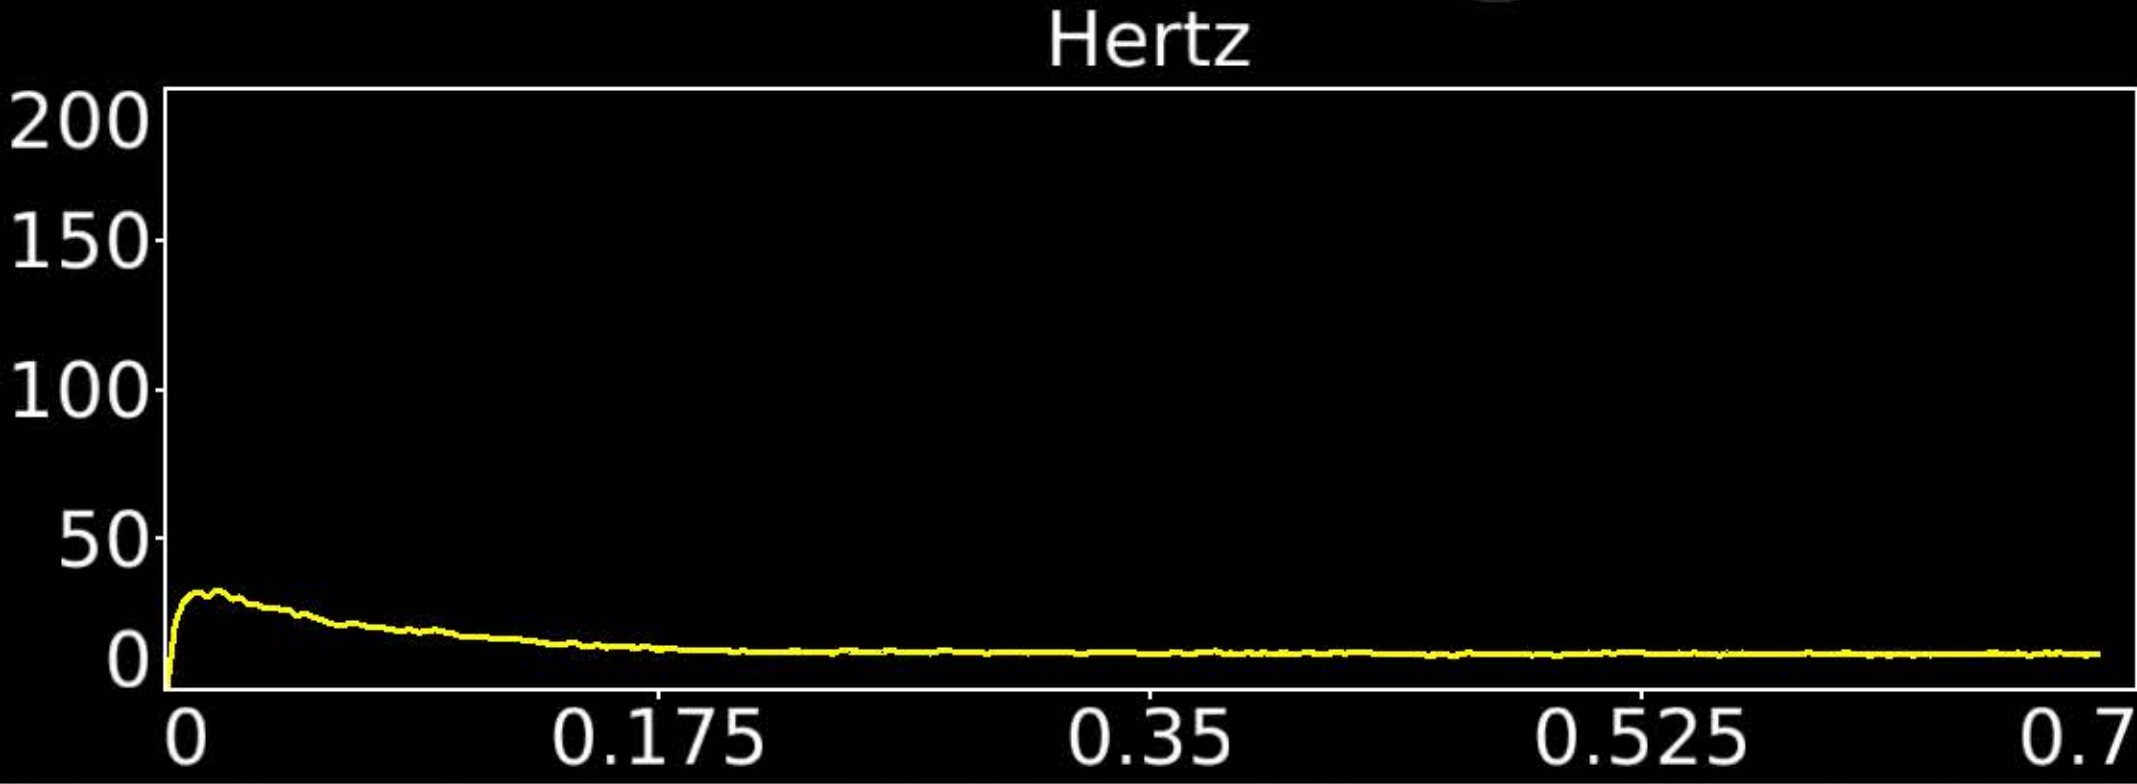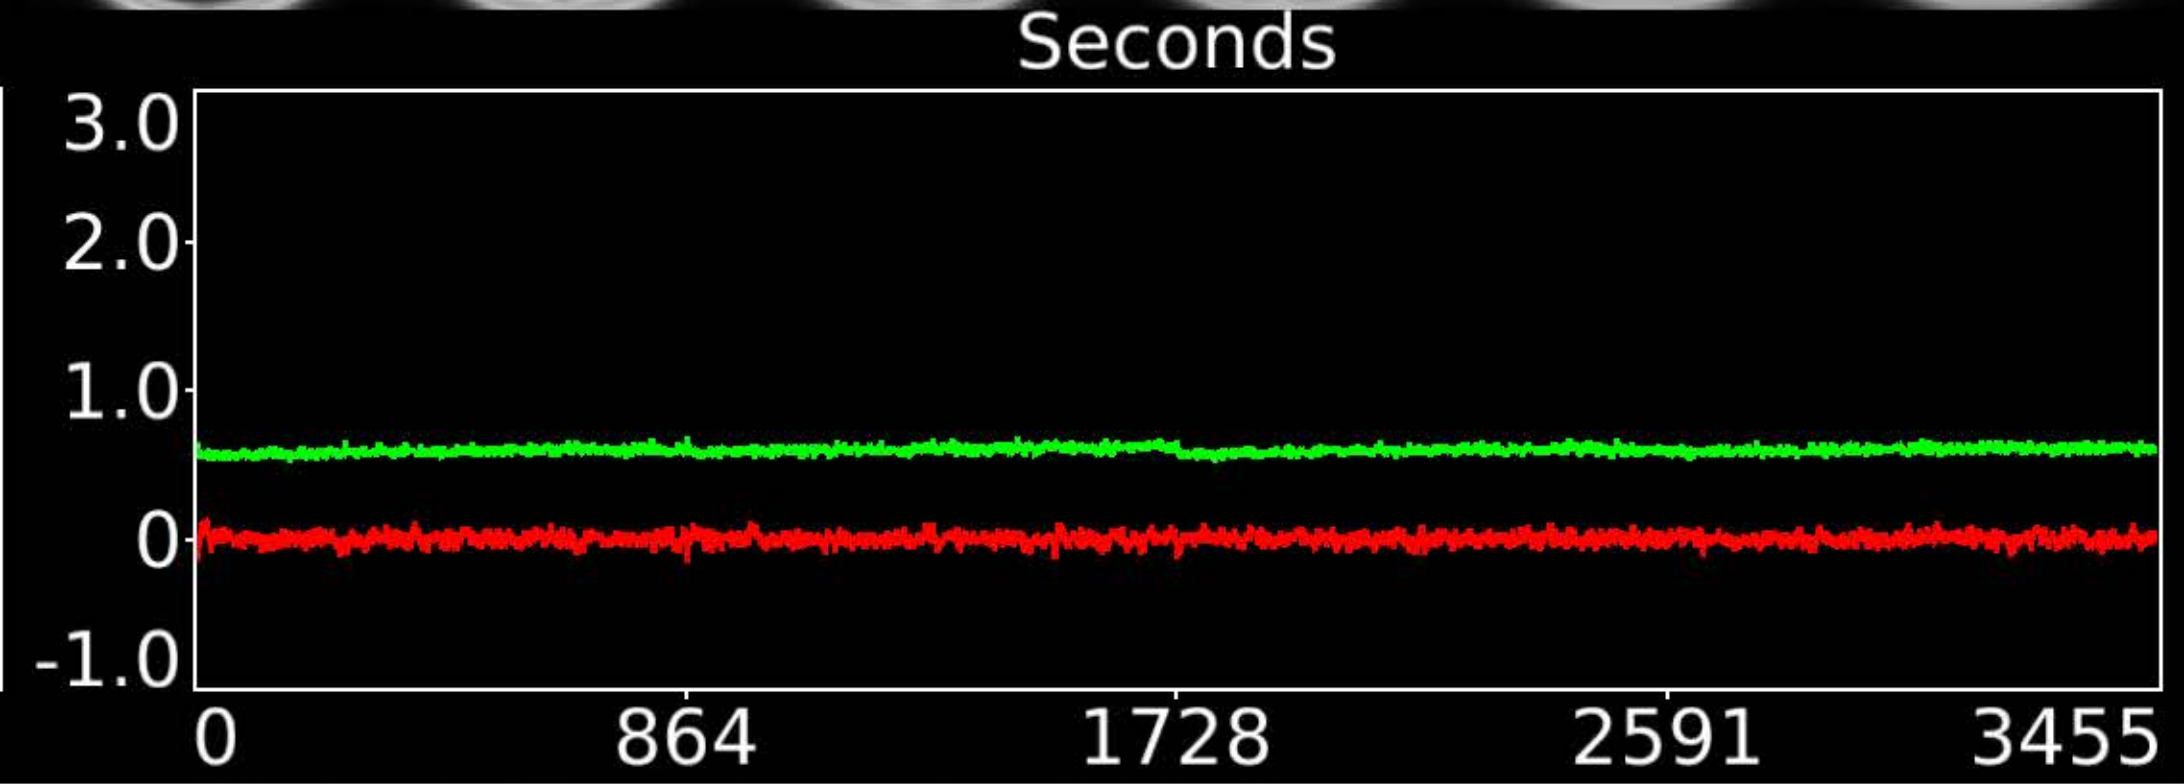

|                                                                                |                            |                                                 |  |
|--------------------------------------------------------------------------------|----------------------------|-------------------------------------------------|--|
| Number & Class: 60 Noise                                                       |                            | Name: Single Subject Global Physiological Noise |  |
| RVT Correlated: No                                                             | DVARS Dip Associated: No   | Cross-Subject Variable: No                      |  |
| Single Subject: Yes                                                            | % Variance Explained: 0.54 | Globality Index: 1.05                           |  |
| Task Component: No                                                             | Taskr Component: No        | Sleep Noted: No                                 |  |
| Rationale: Single subject component with high correlation to global timecourse |                            |                                                 |  |



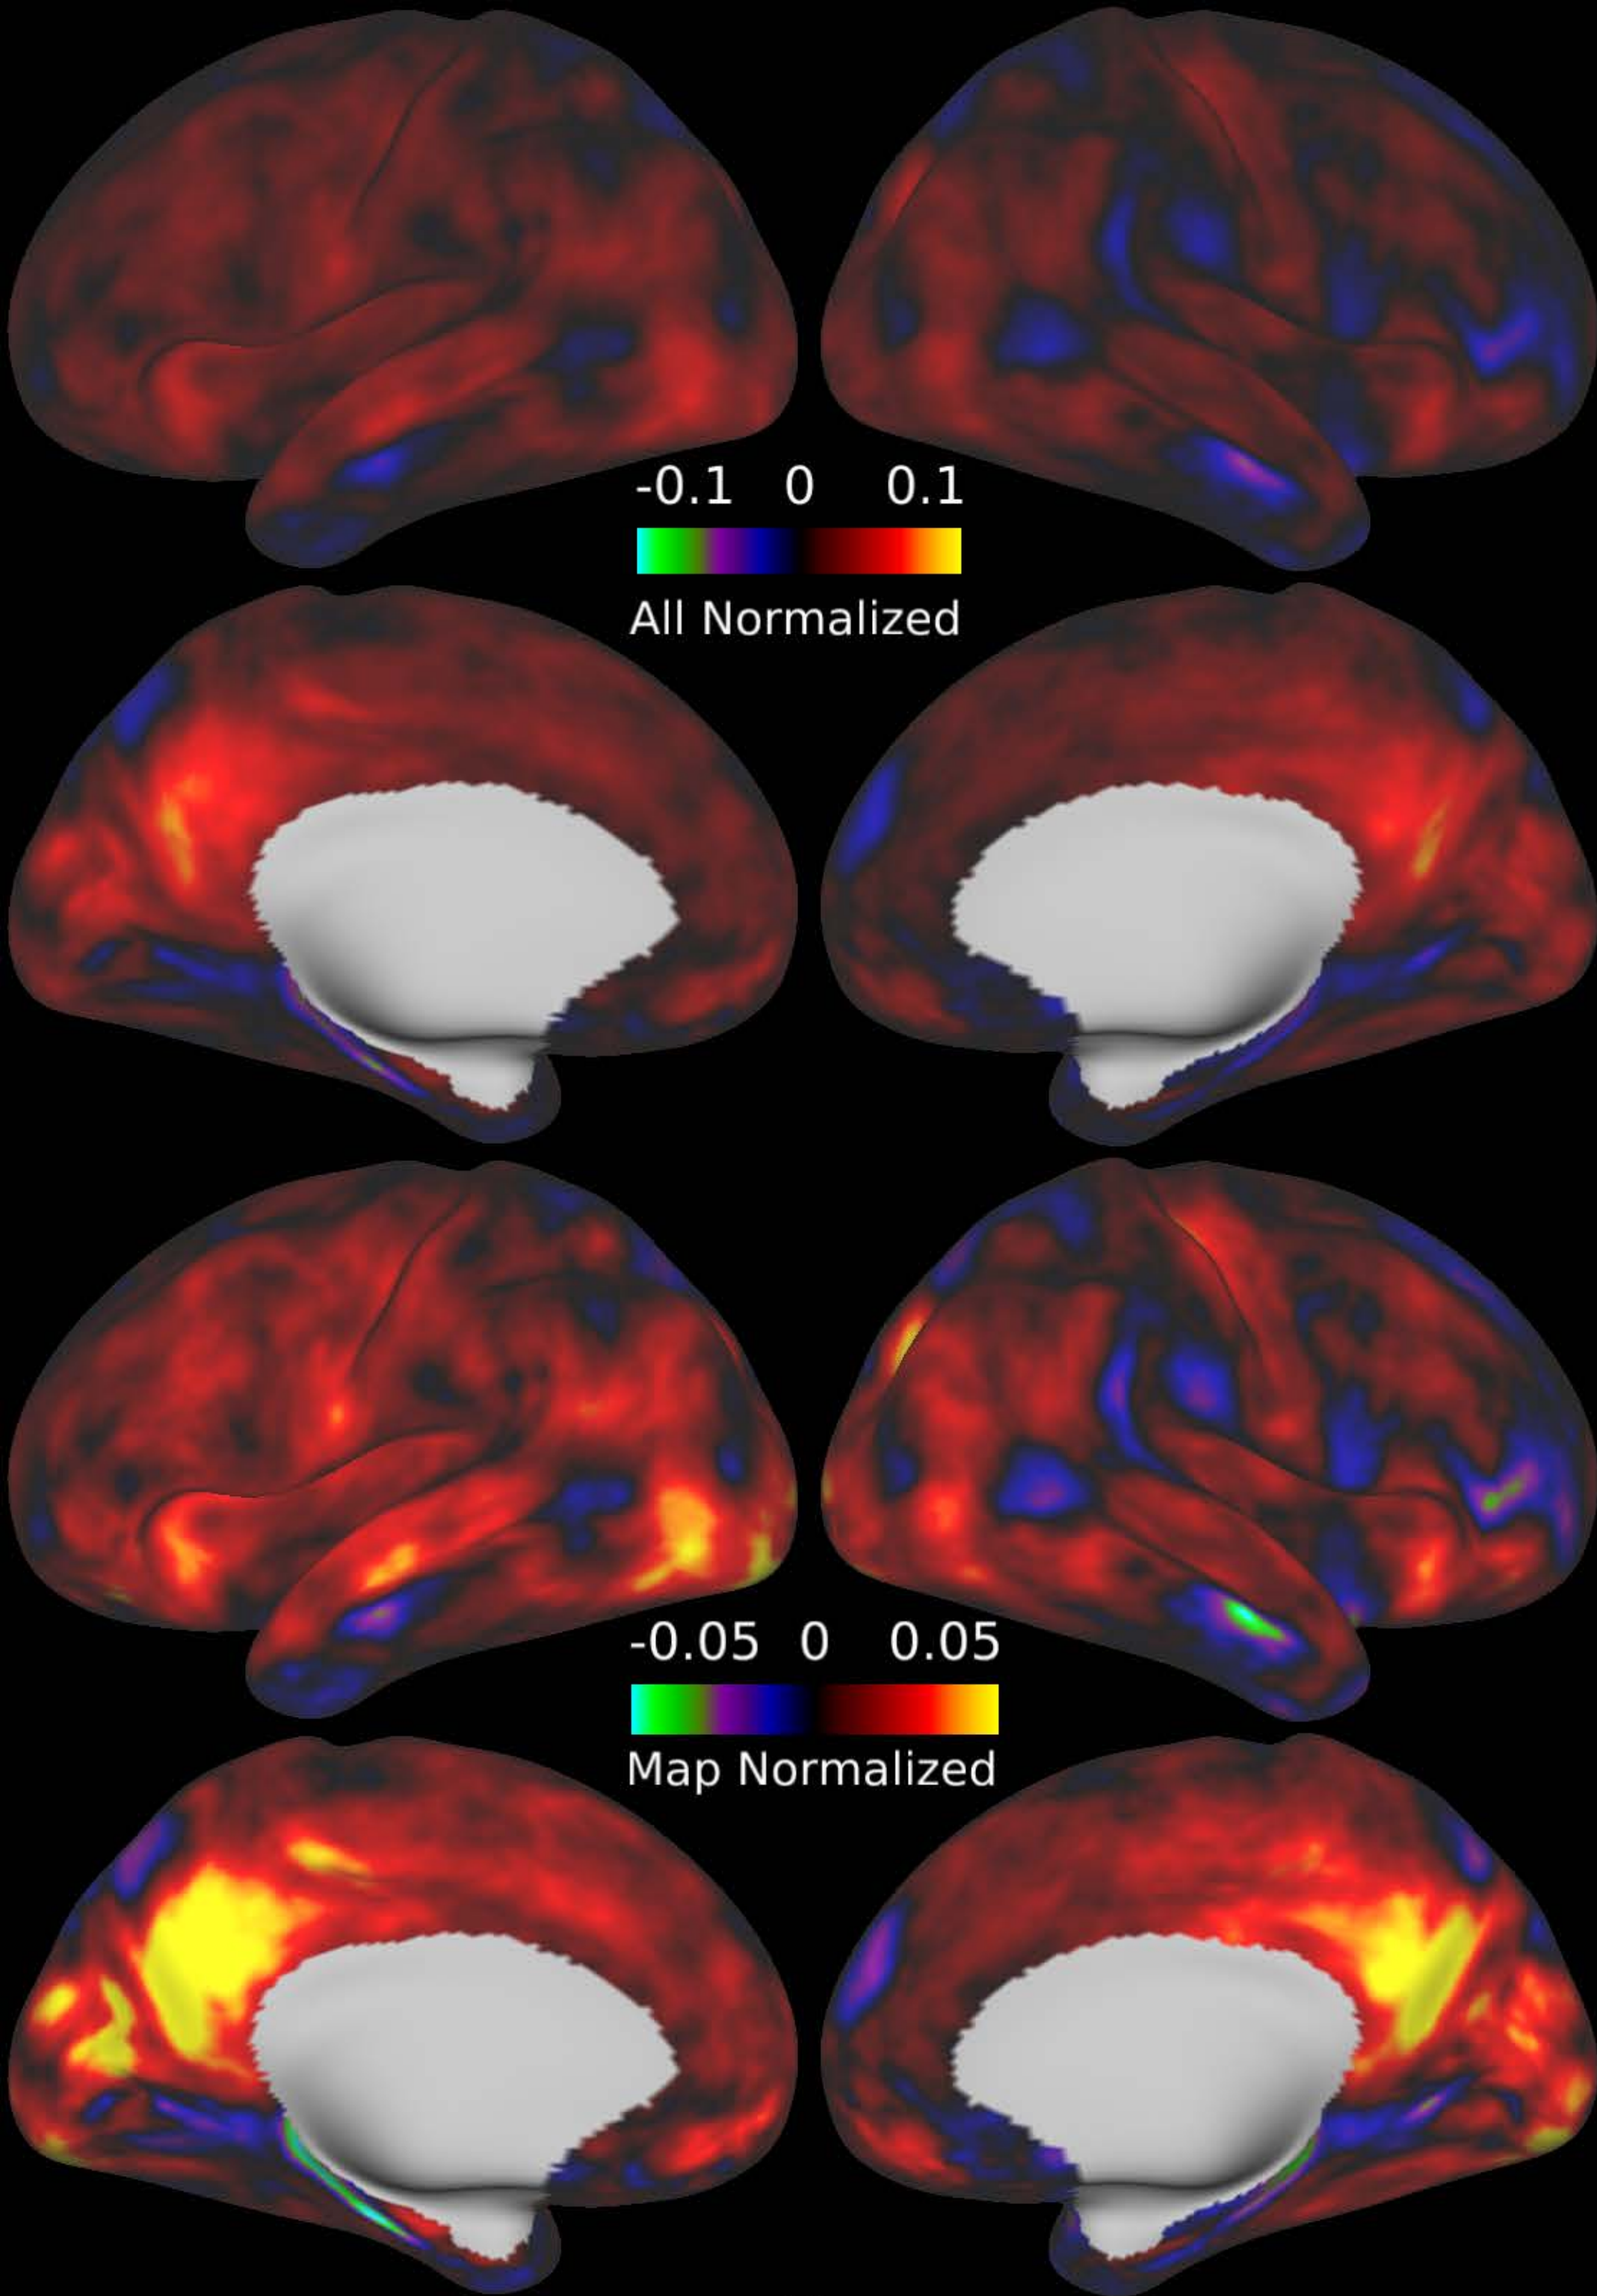

Hertz

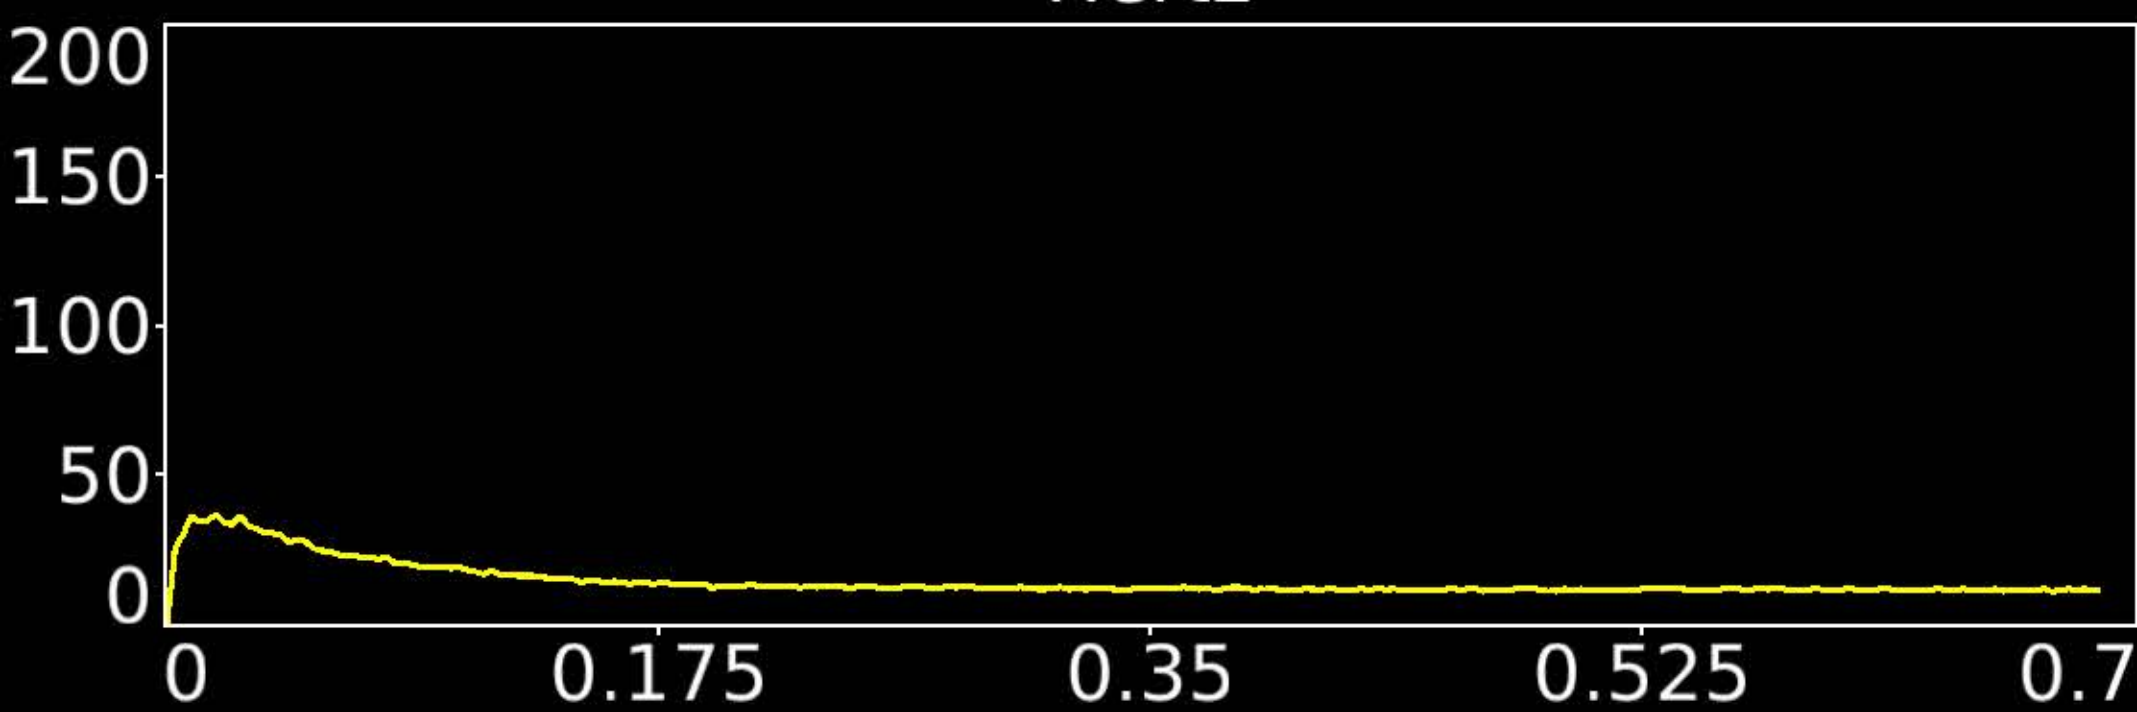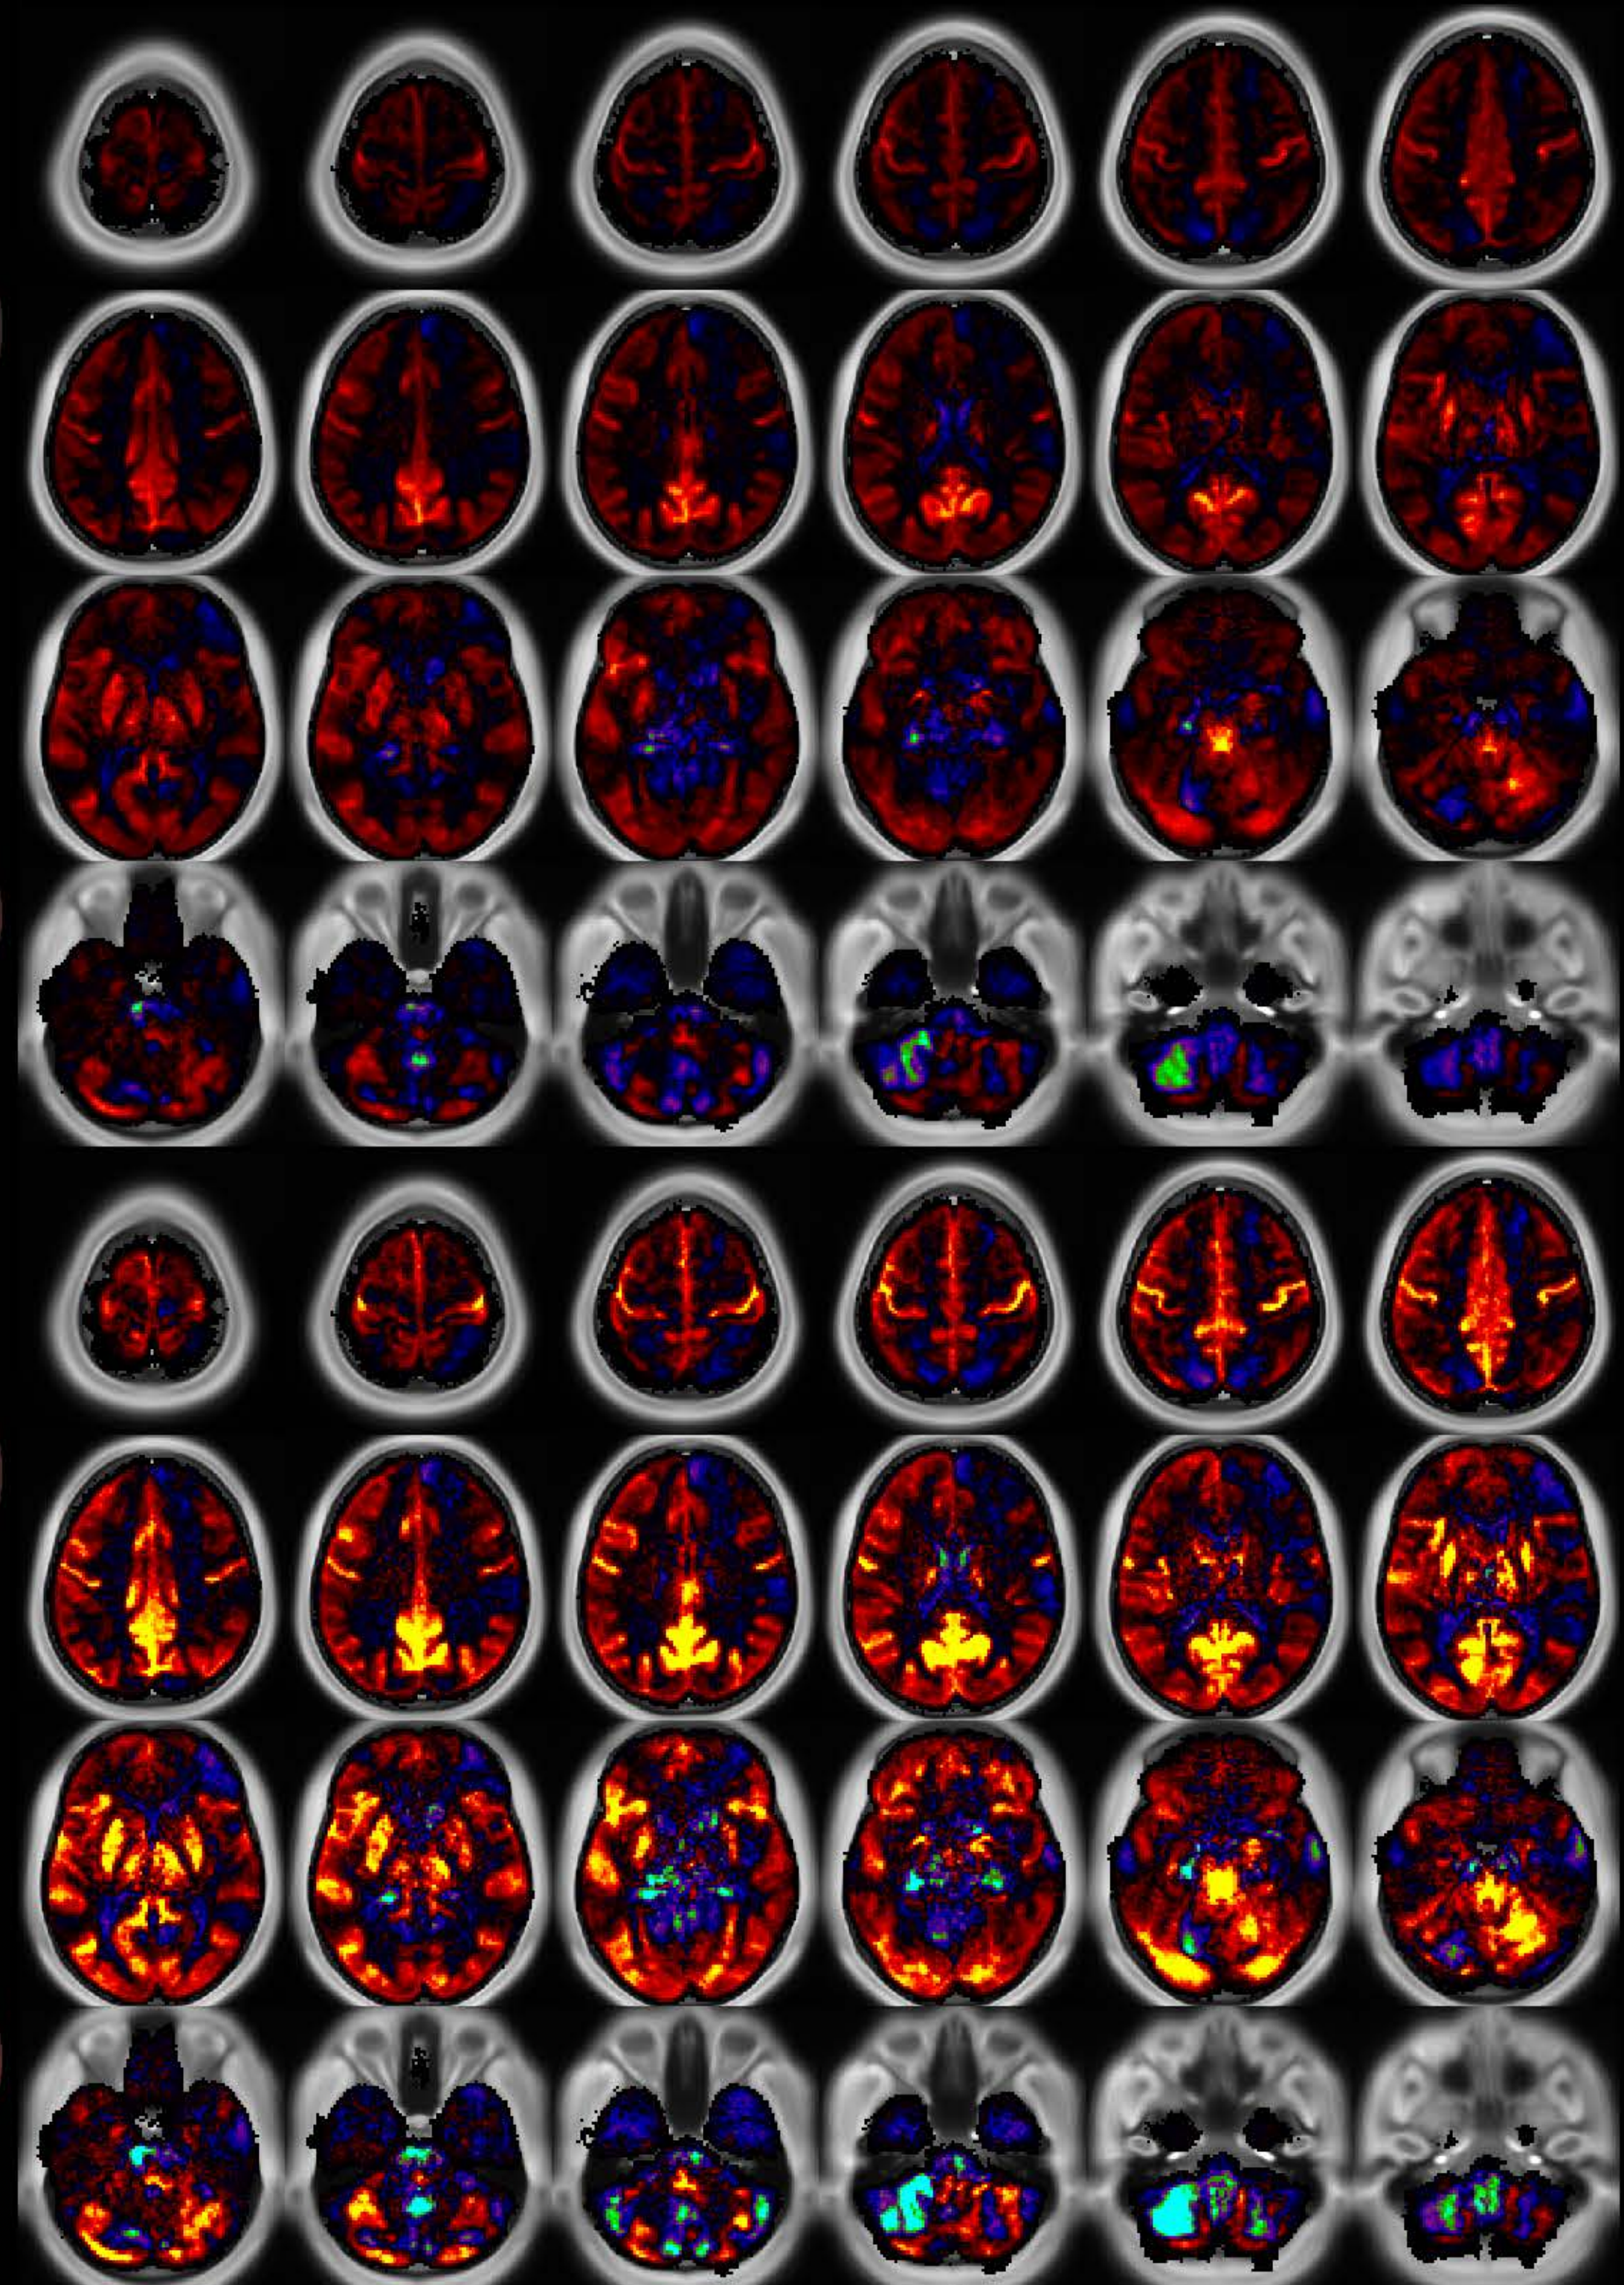

Seconds

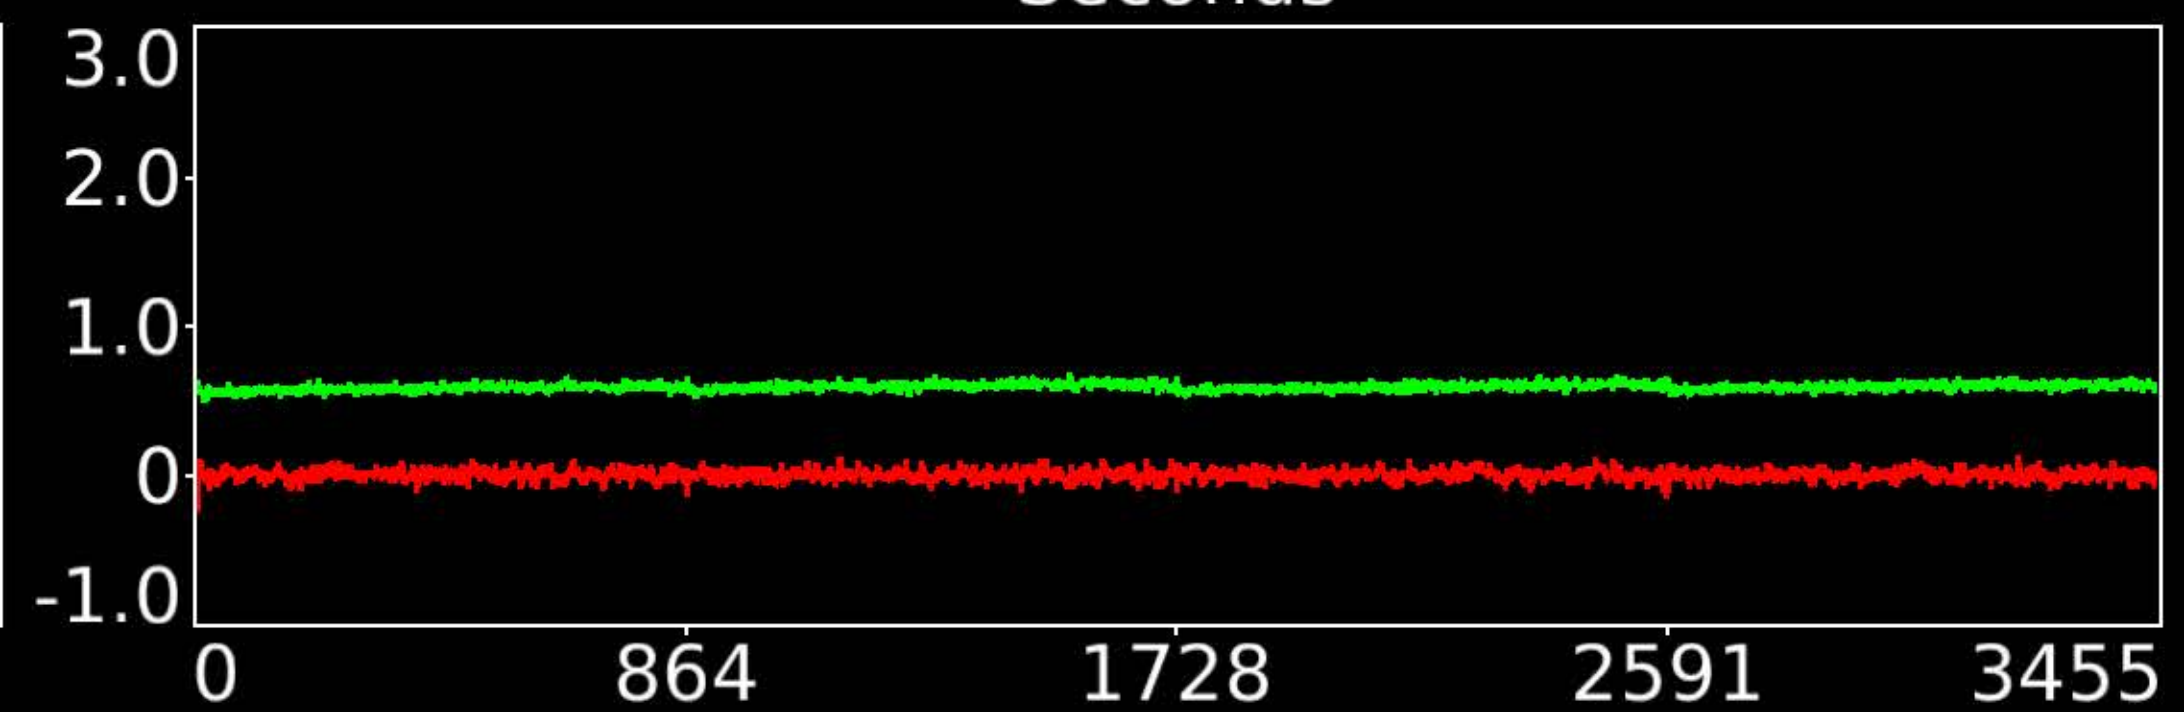

|                                                                                |                            |                                             |  |
|--------------------------------------------------------------------------------|----------------------------|---------------------------------------------|--|
| Number & Class: 61 Noise                                                       |                            | Name: Subsidiary Global Physiological Noise |  |
| RVT Correlated: No                                                             | DVARS Dip Associated: No   | Cross-Subject Variable: Yes                 |  |
| Single Subject: Yes                                                            | % Variance Explained: 0.54 | Globality Index: 1.41                       |  |
| Task Component: No                                                             | Taskr Component: No        | Sleep Noted: No                             |  |
| Rationale: Single subject component with high correlation to global timecourse |                            |                                             |  |



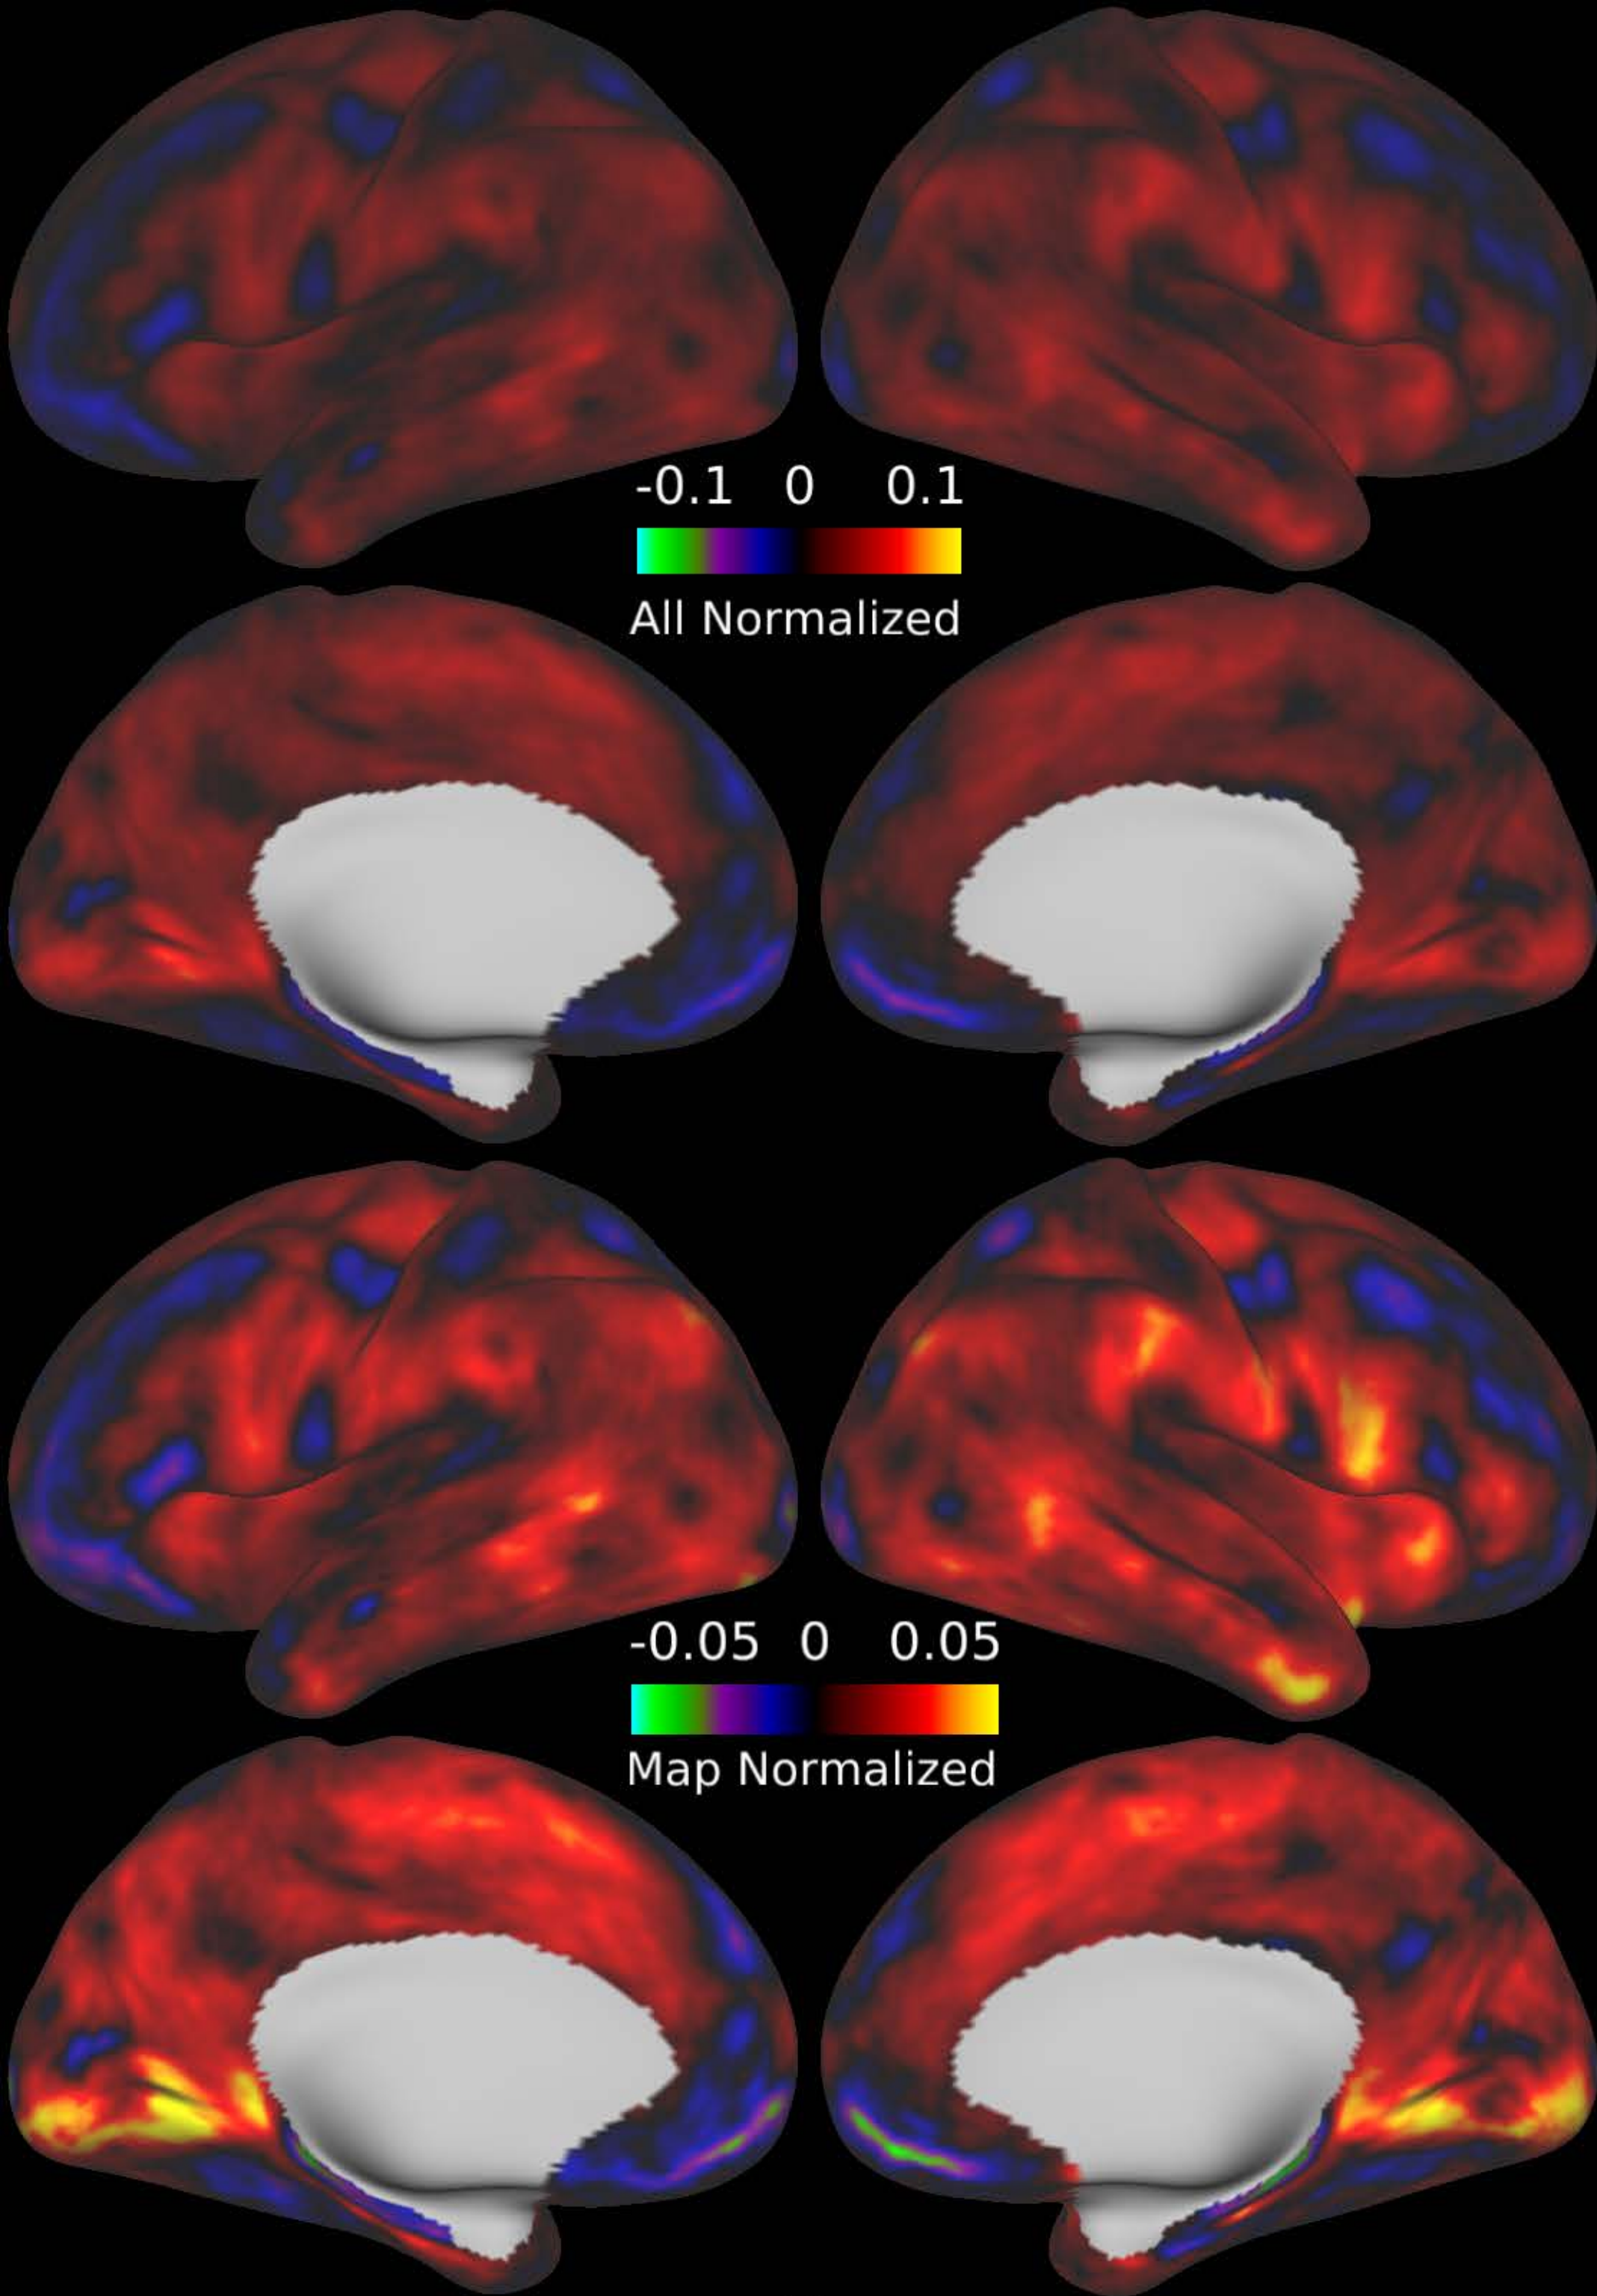

Hertz

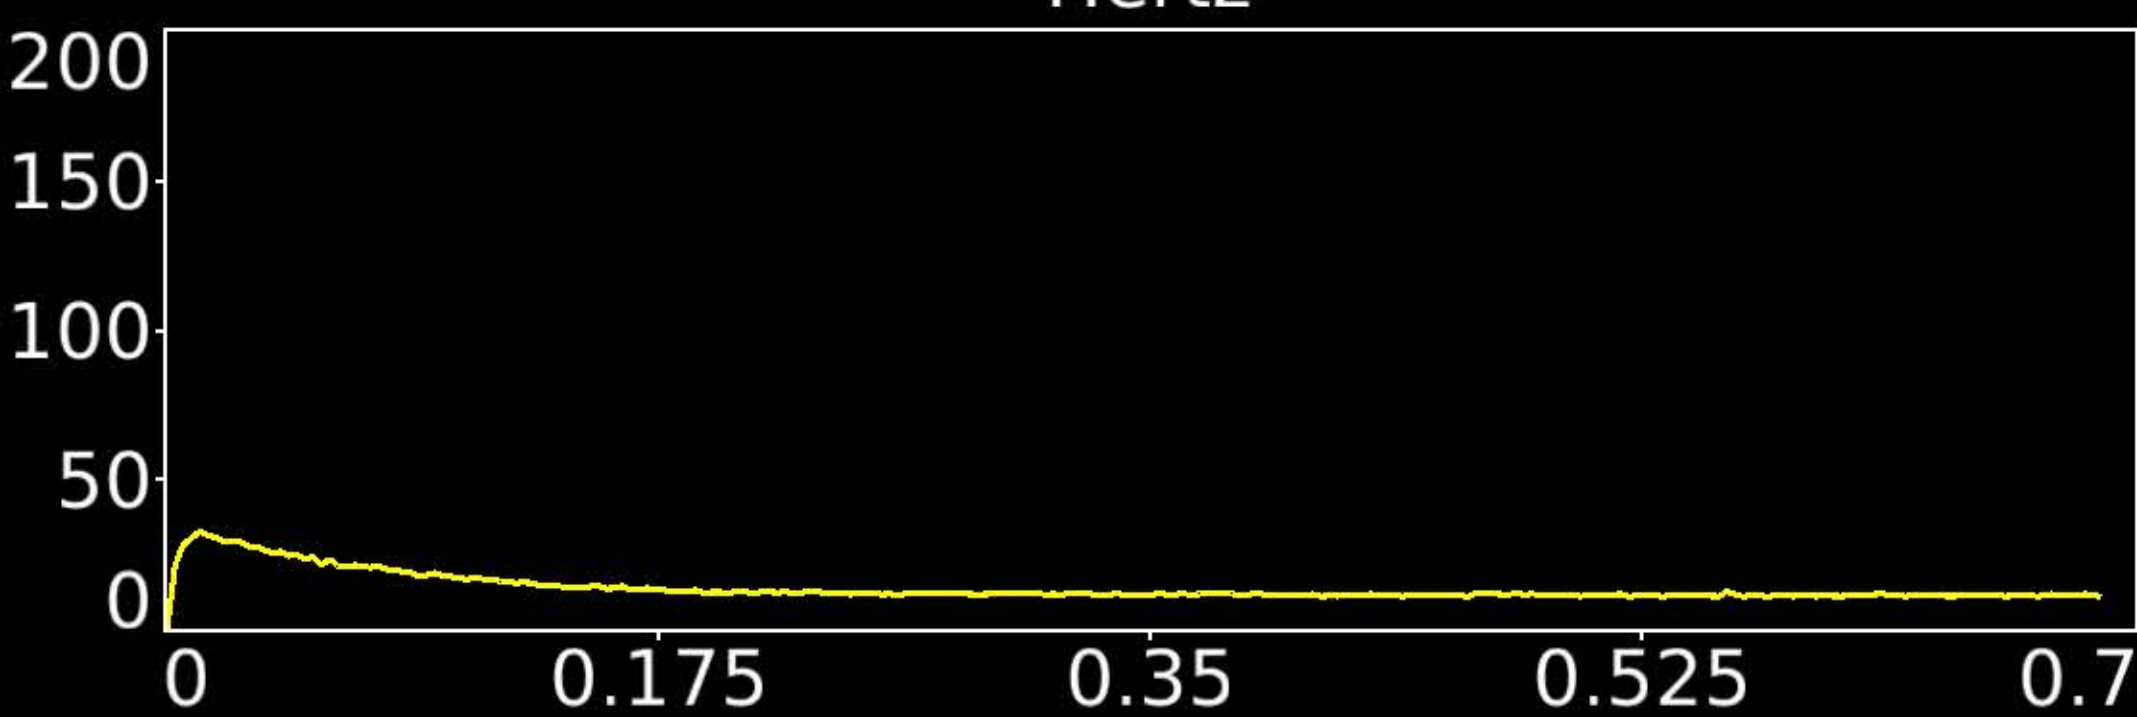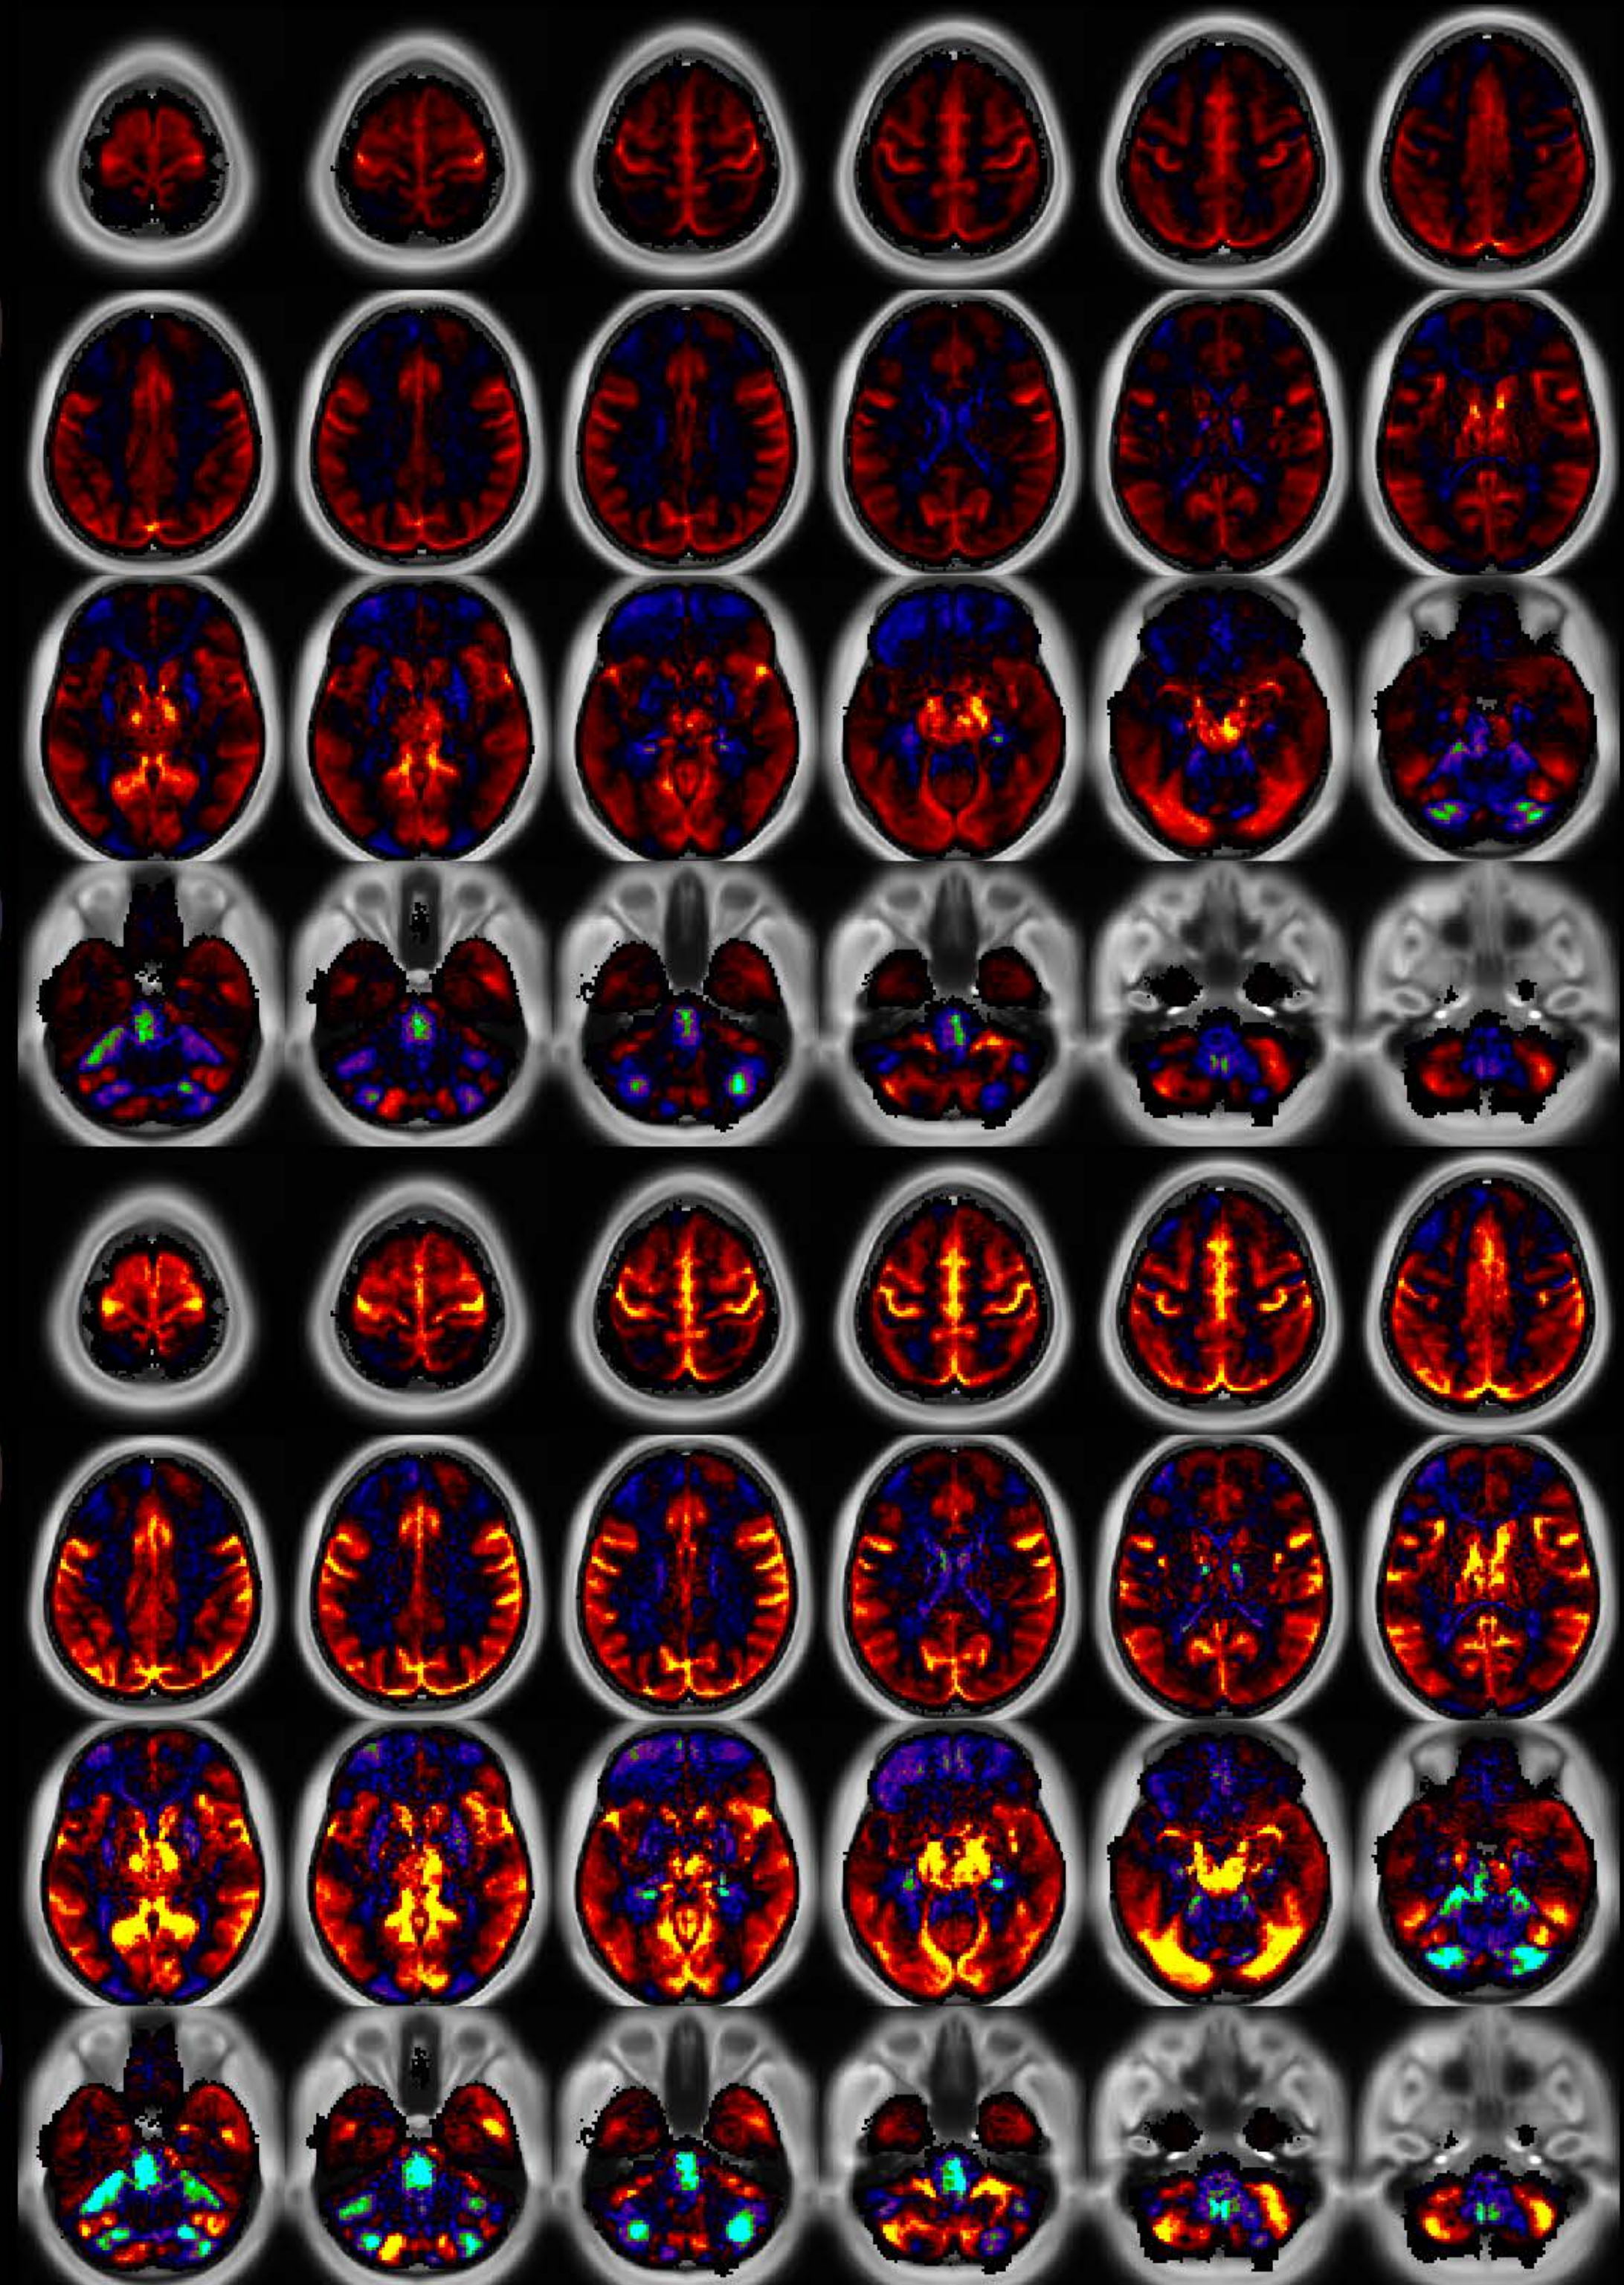

Seconds

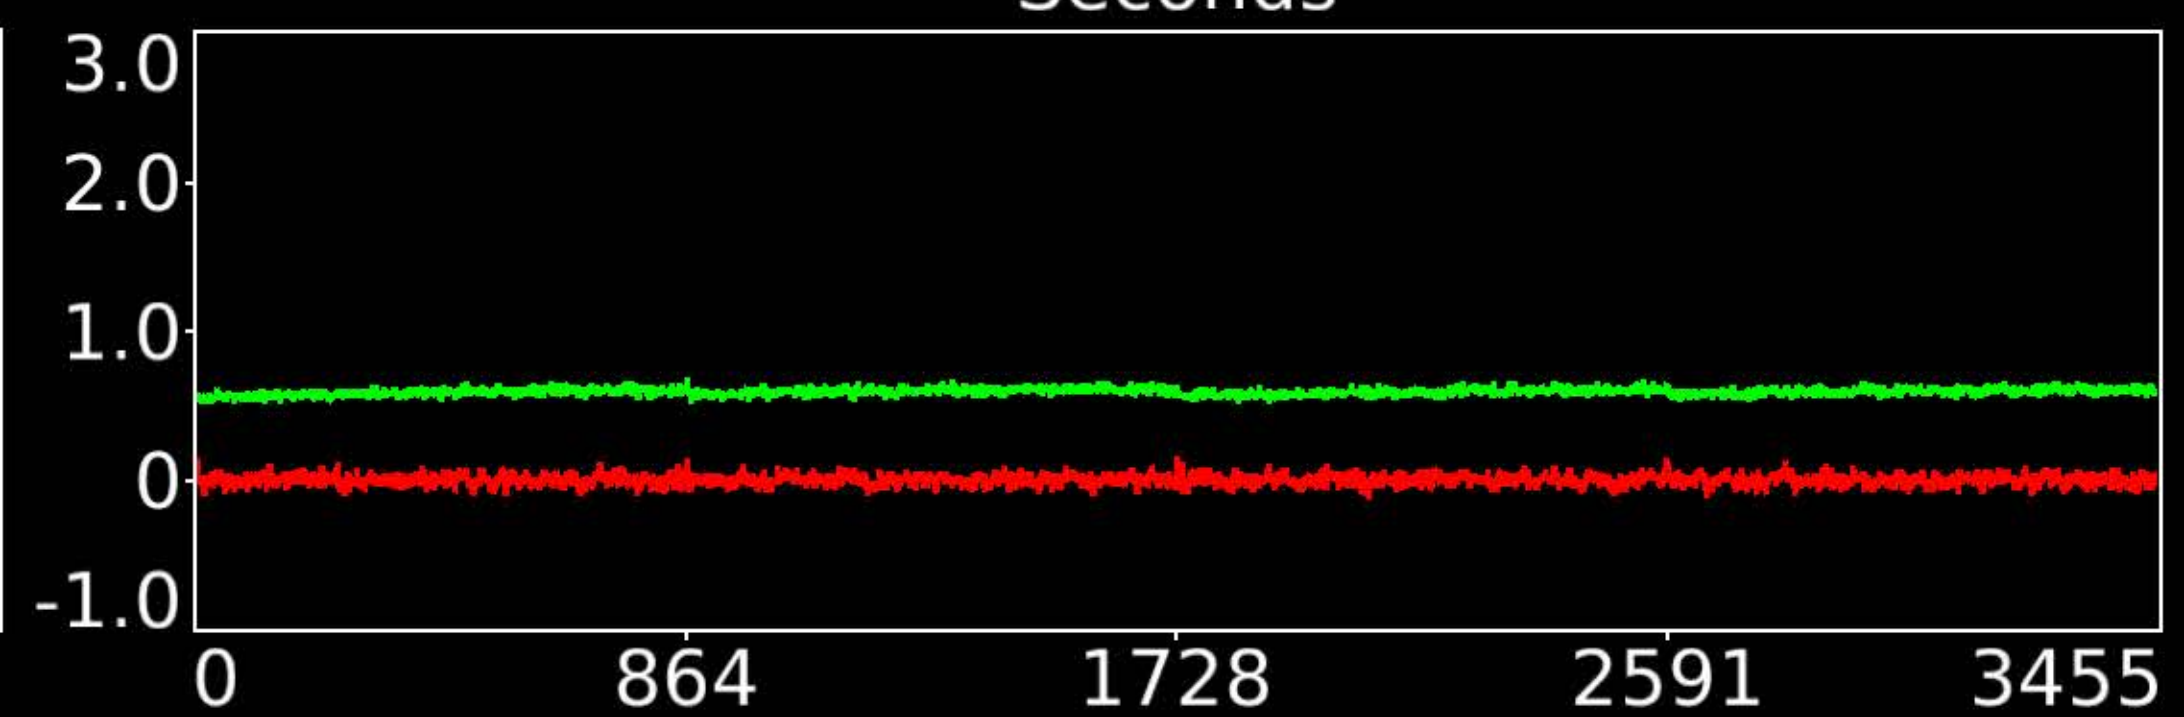

|                                                                                |                            |                                             |  |
|--------------------------------------------------------------------------------|----------------------------|---------------------------------------------|--|
| Number & Class: 62 Noise                                                       |                            | Name: Subsidiary Global Physiological Noise |  |
| RVT Correlated: No                                                             | DVARS Dip Associated: No   | Cross-Subject Variable: No                  |  |
| Single Subject: Yes                                                            | % Variance Explained: 0.54 | Globality Index: 1.41                       |  |
| Task Component: No                                                             | Taskr Component: No        | Sleep Noted: No                             |  |
| Rationale: Single subject component with high correlation to global timecourse |                            |                                             |  |



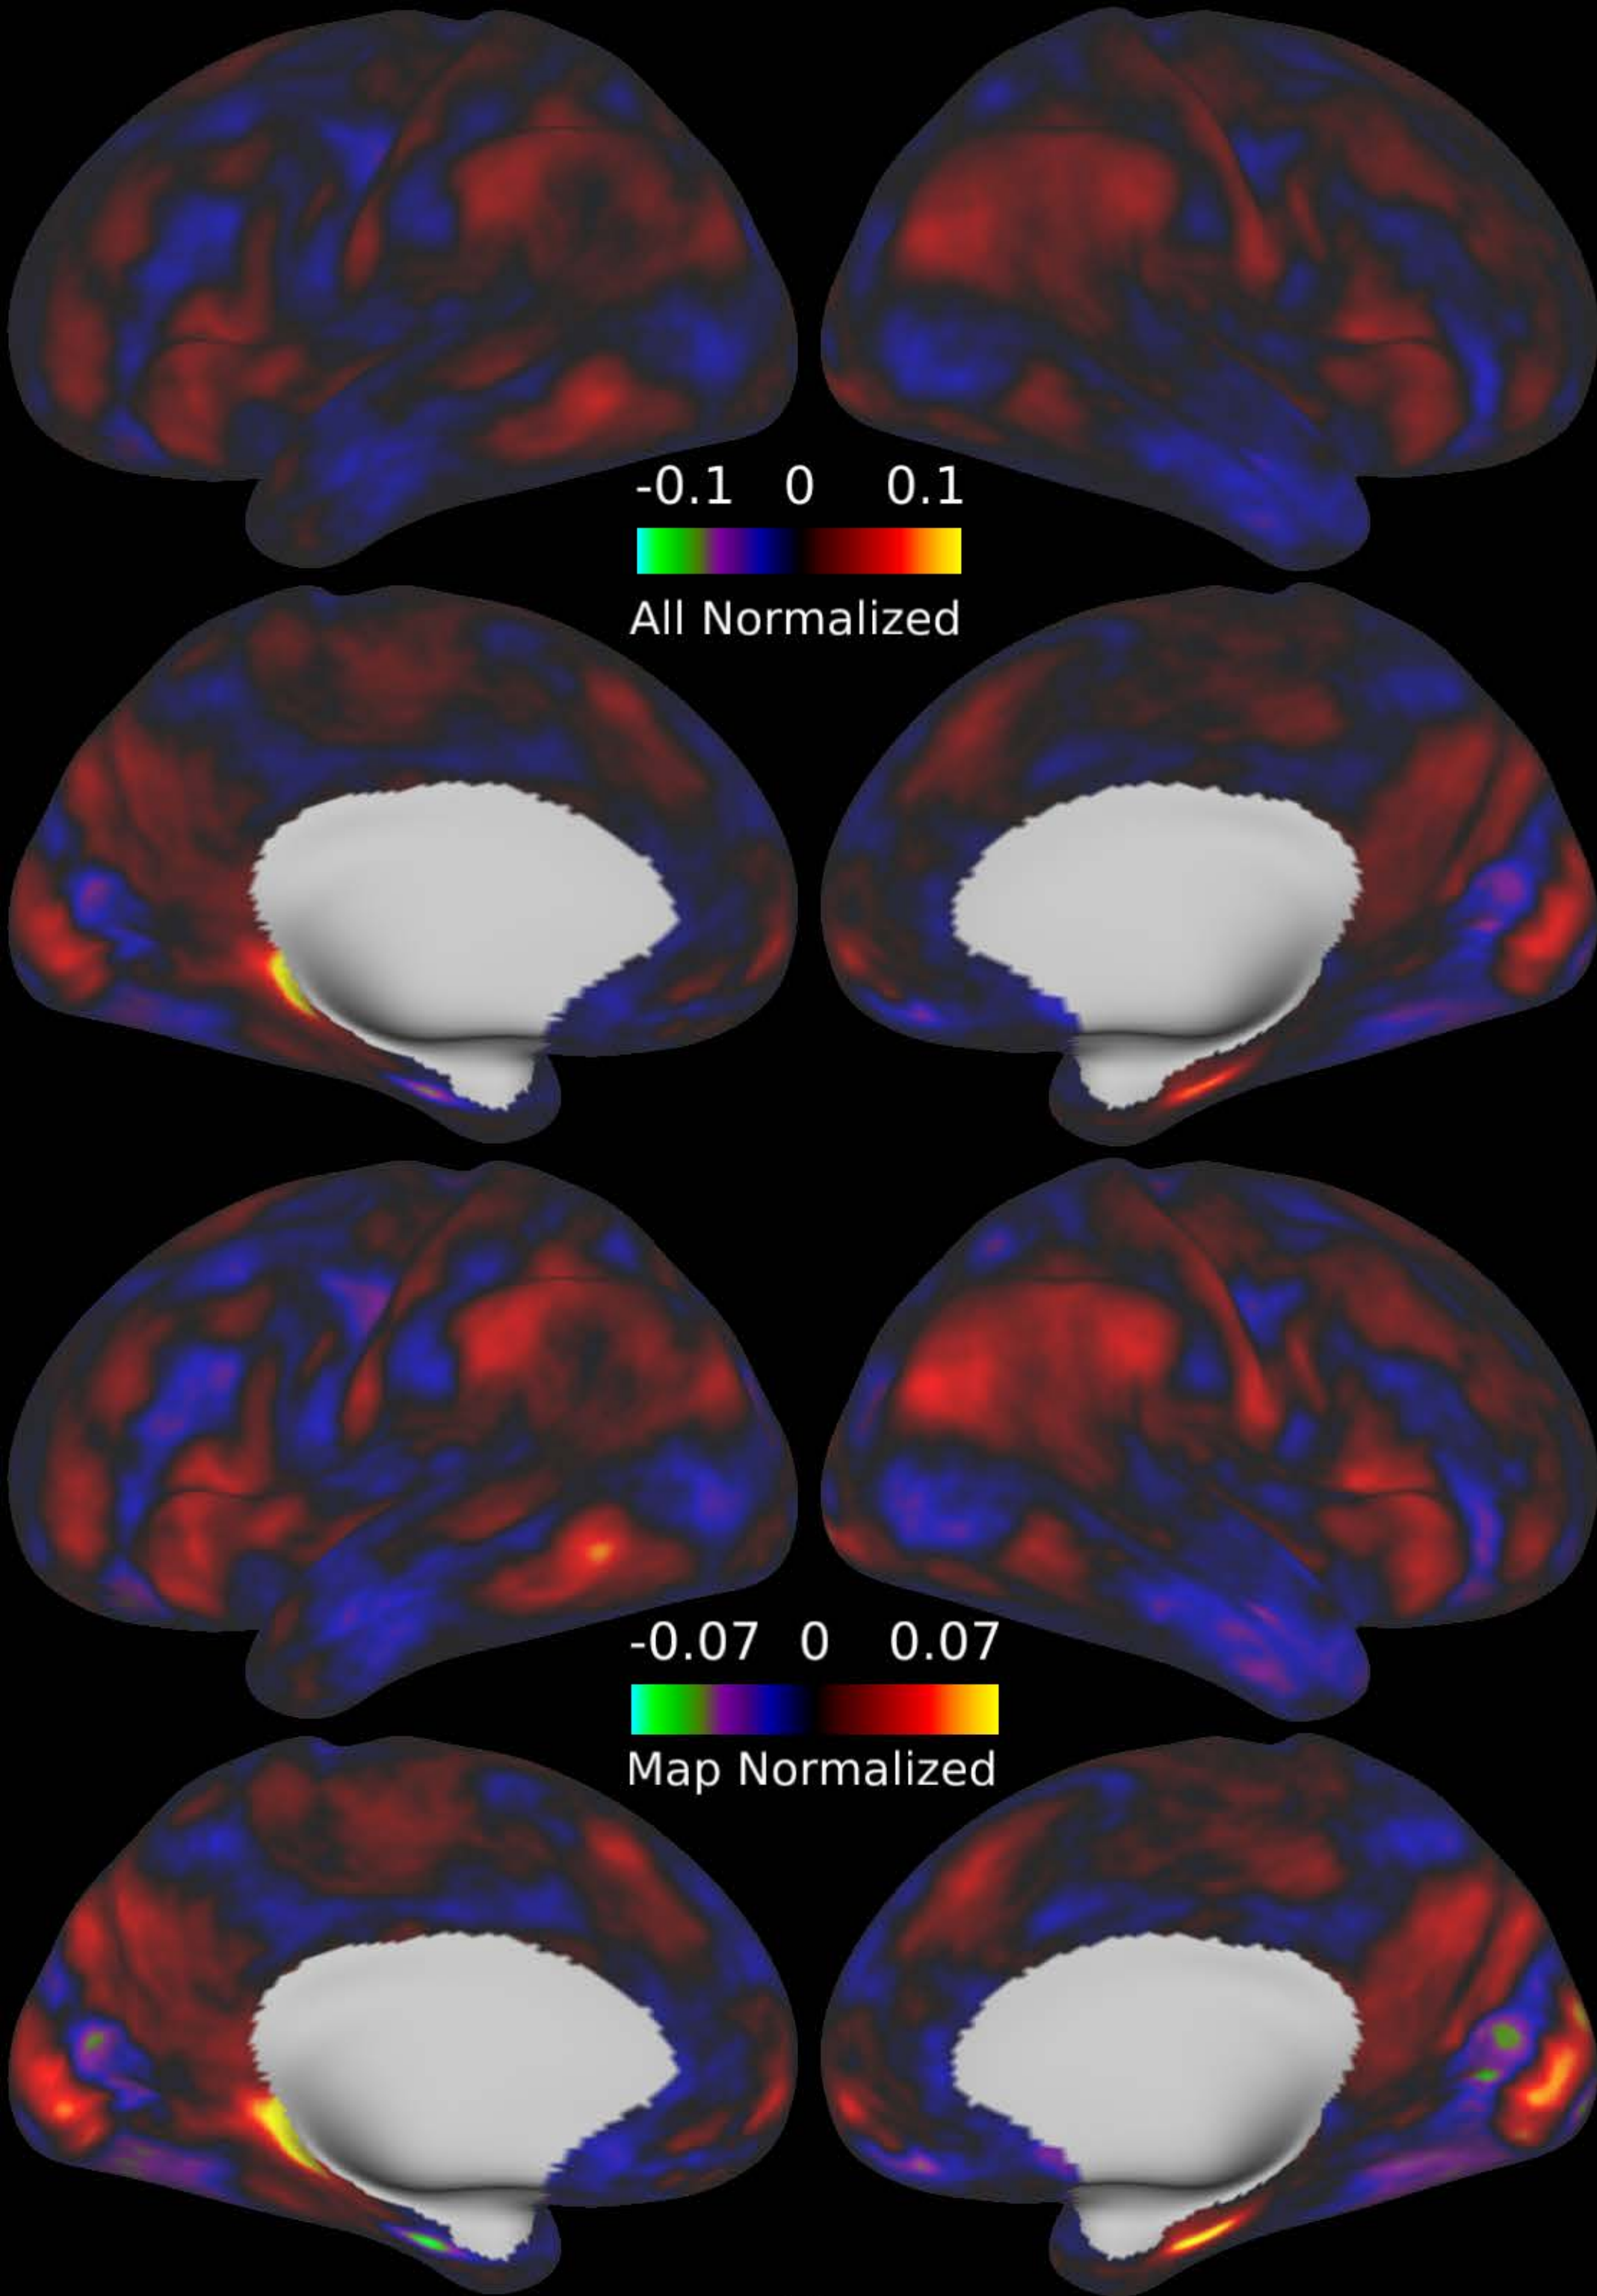

Hertz

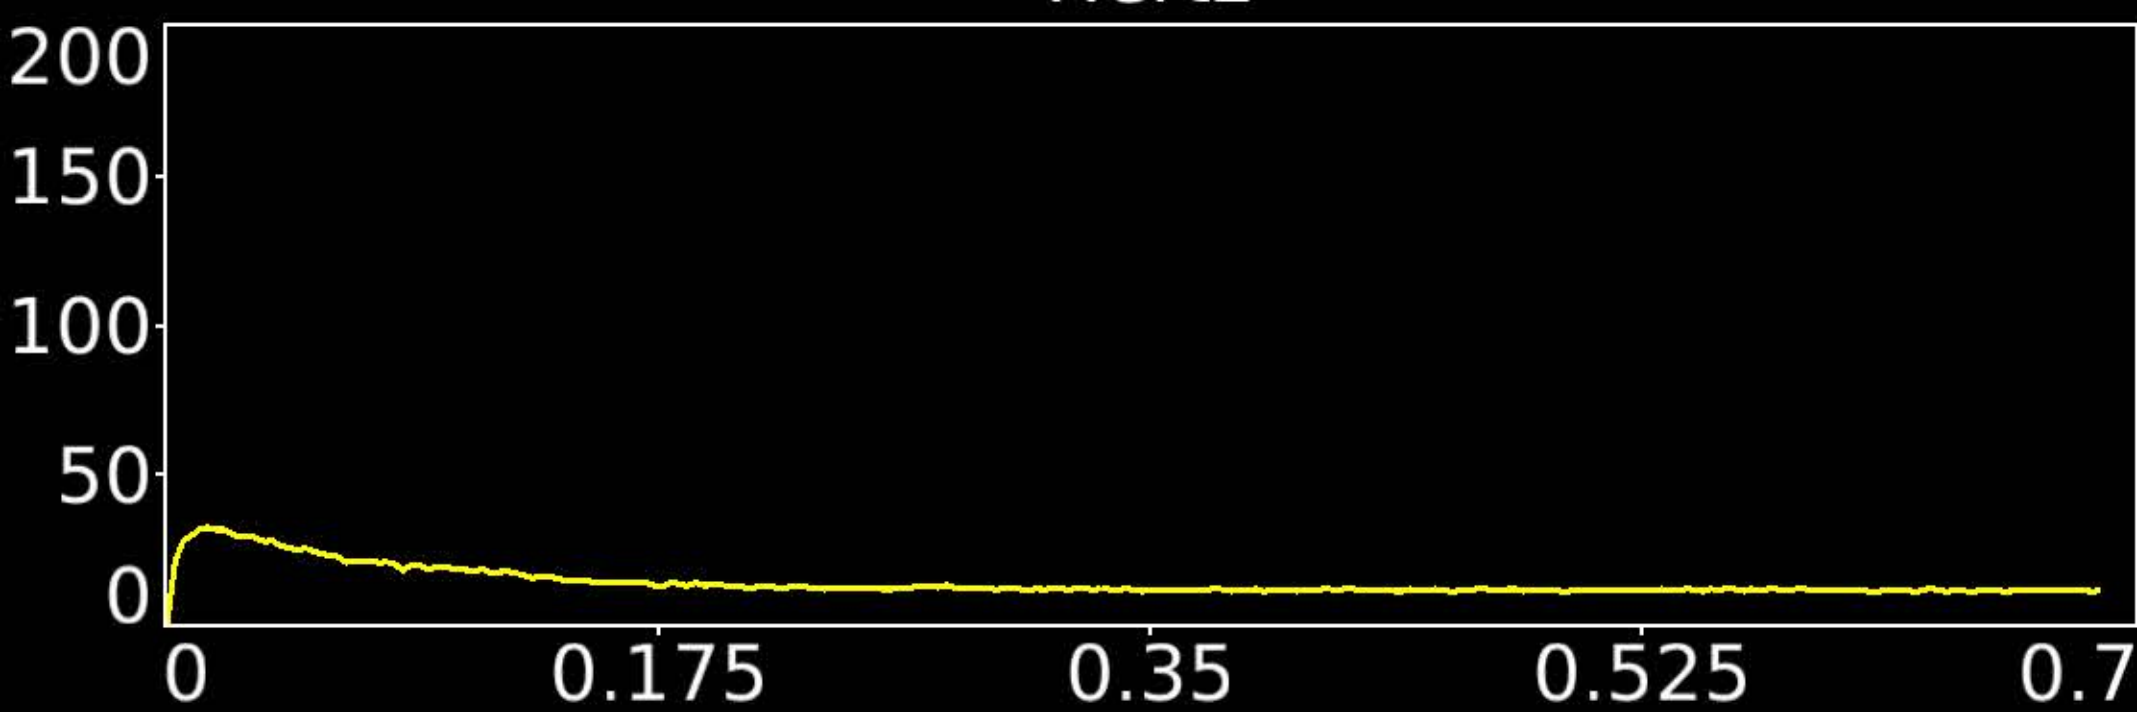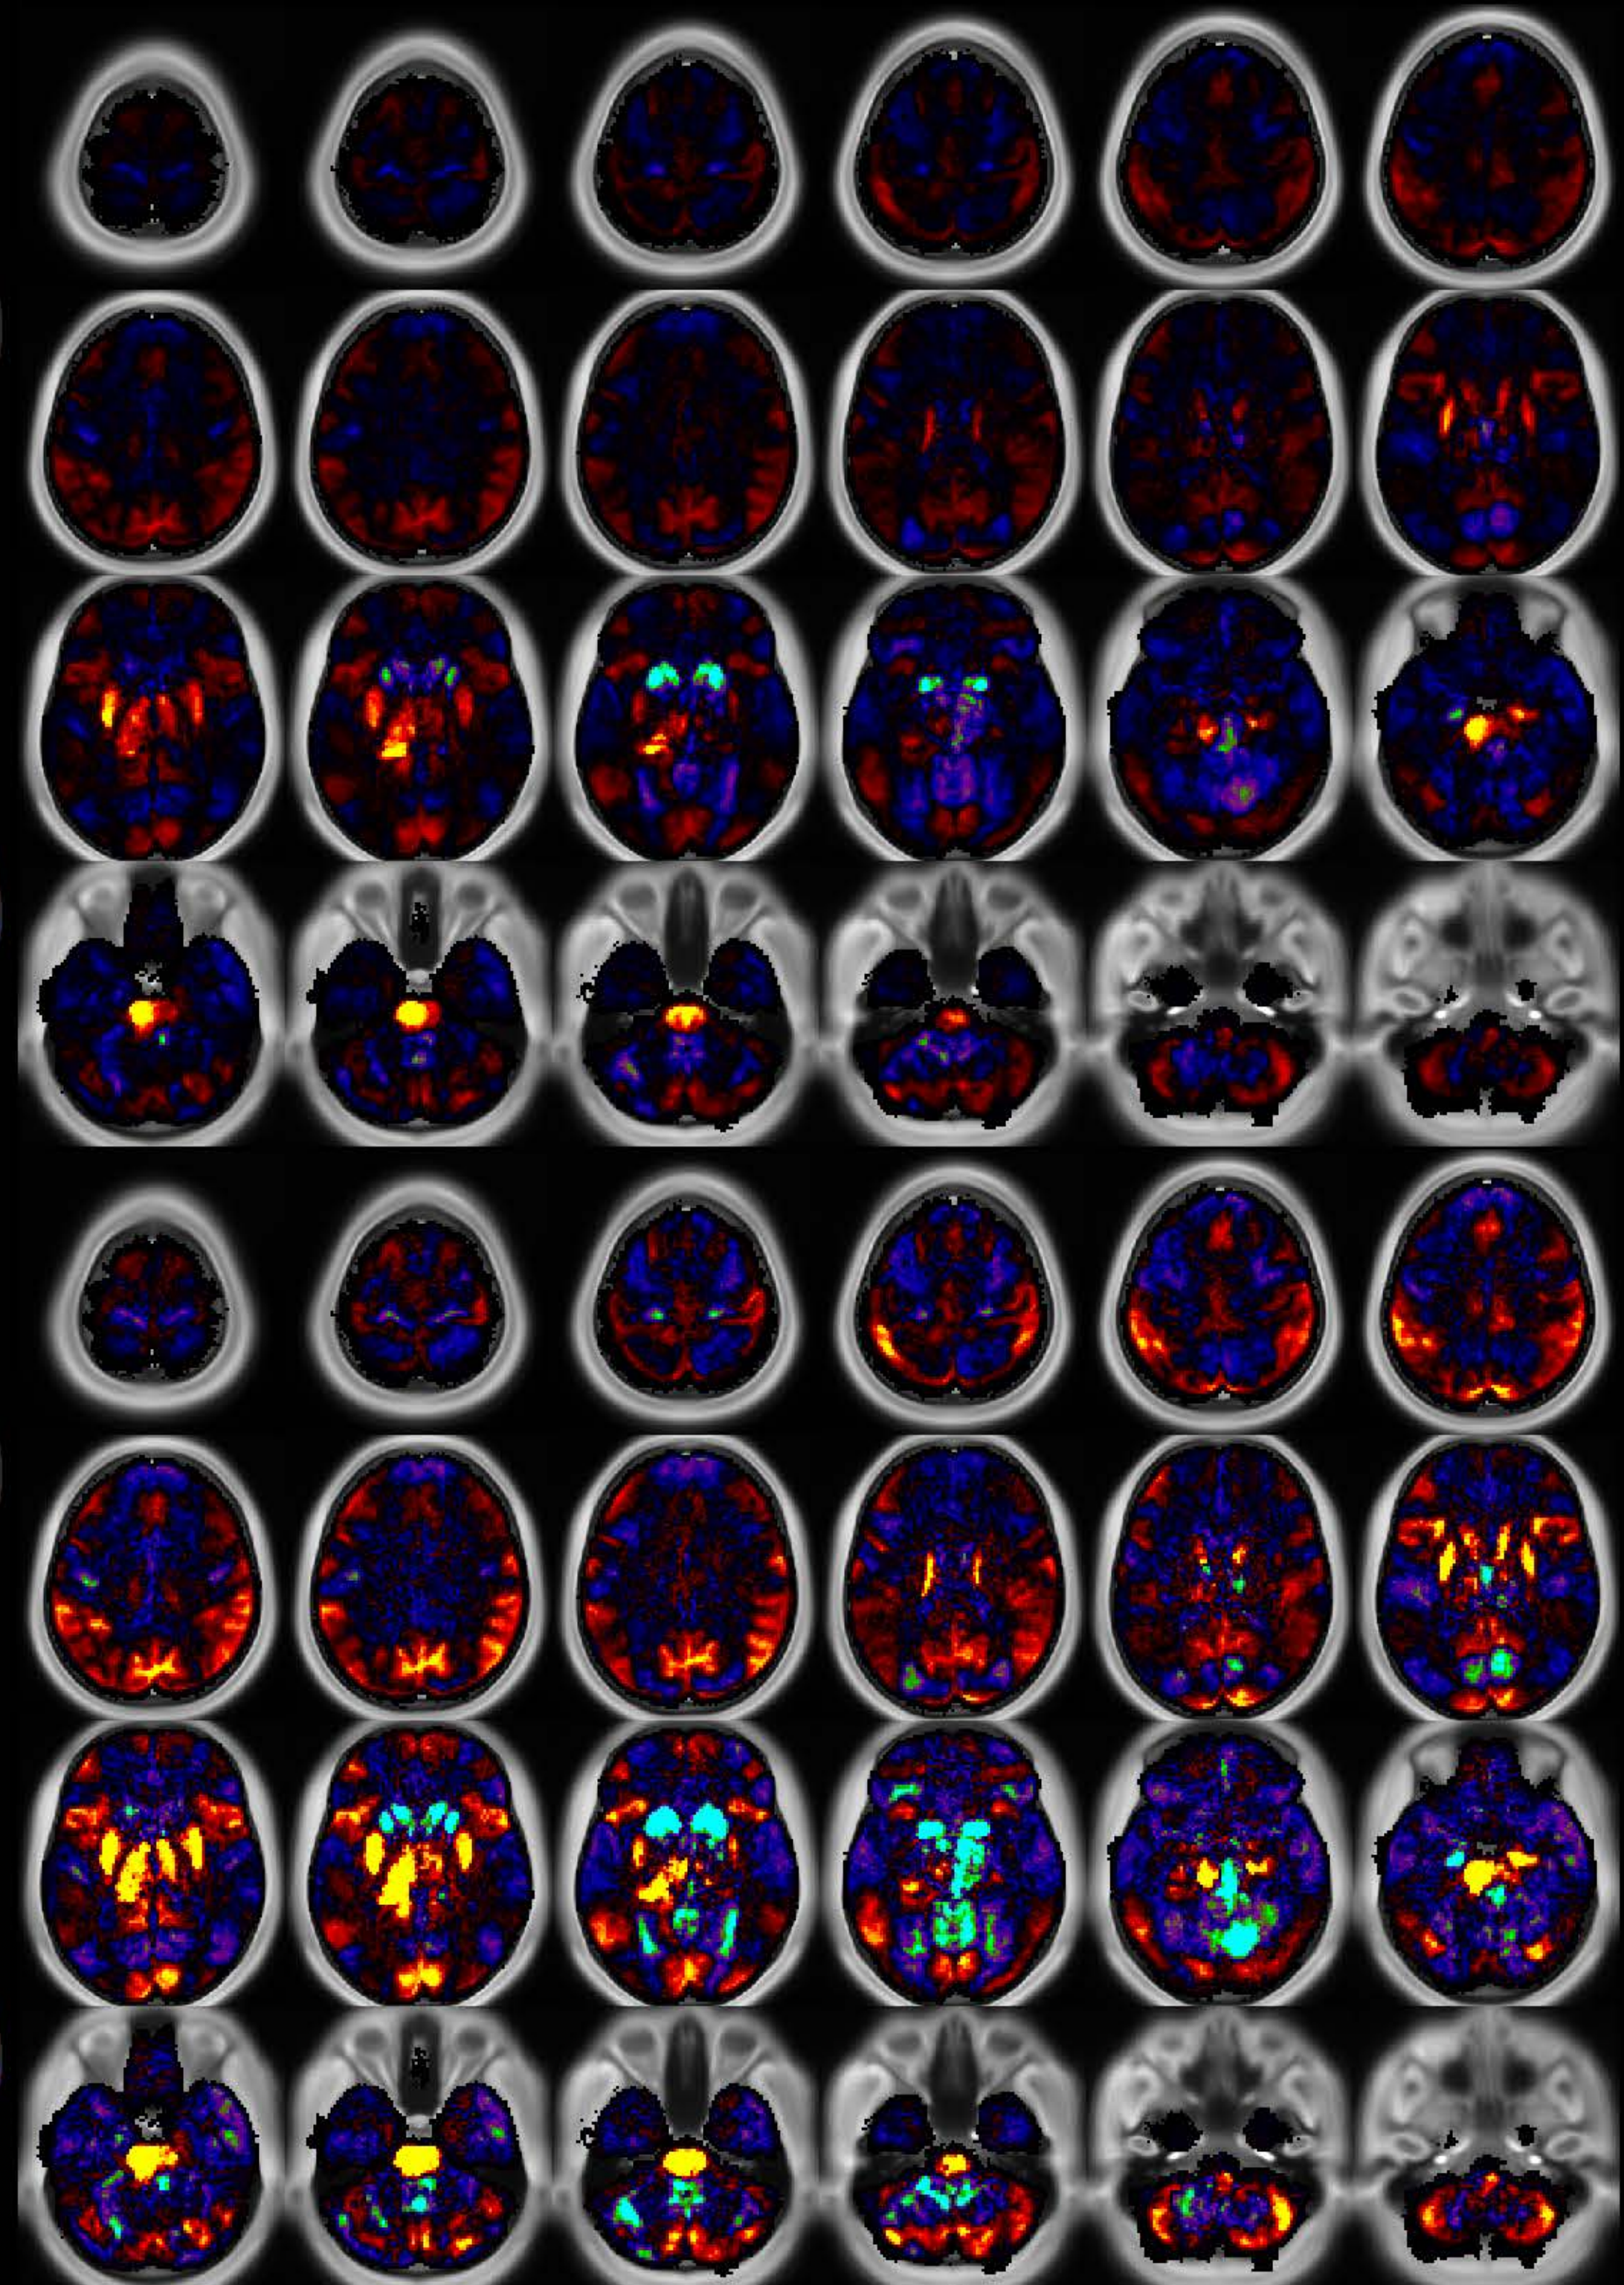

Seconds

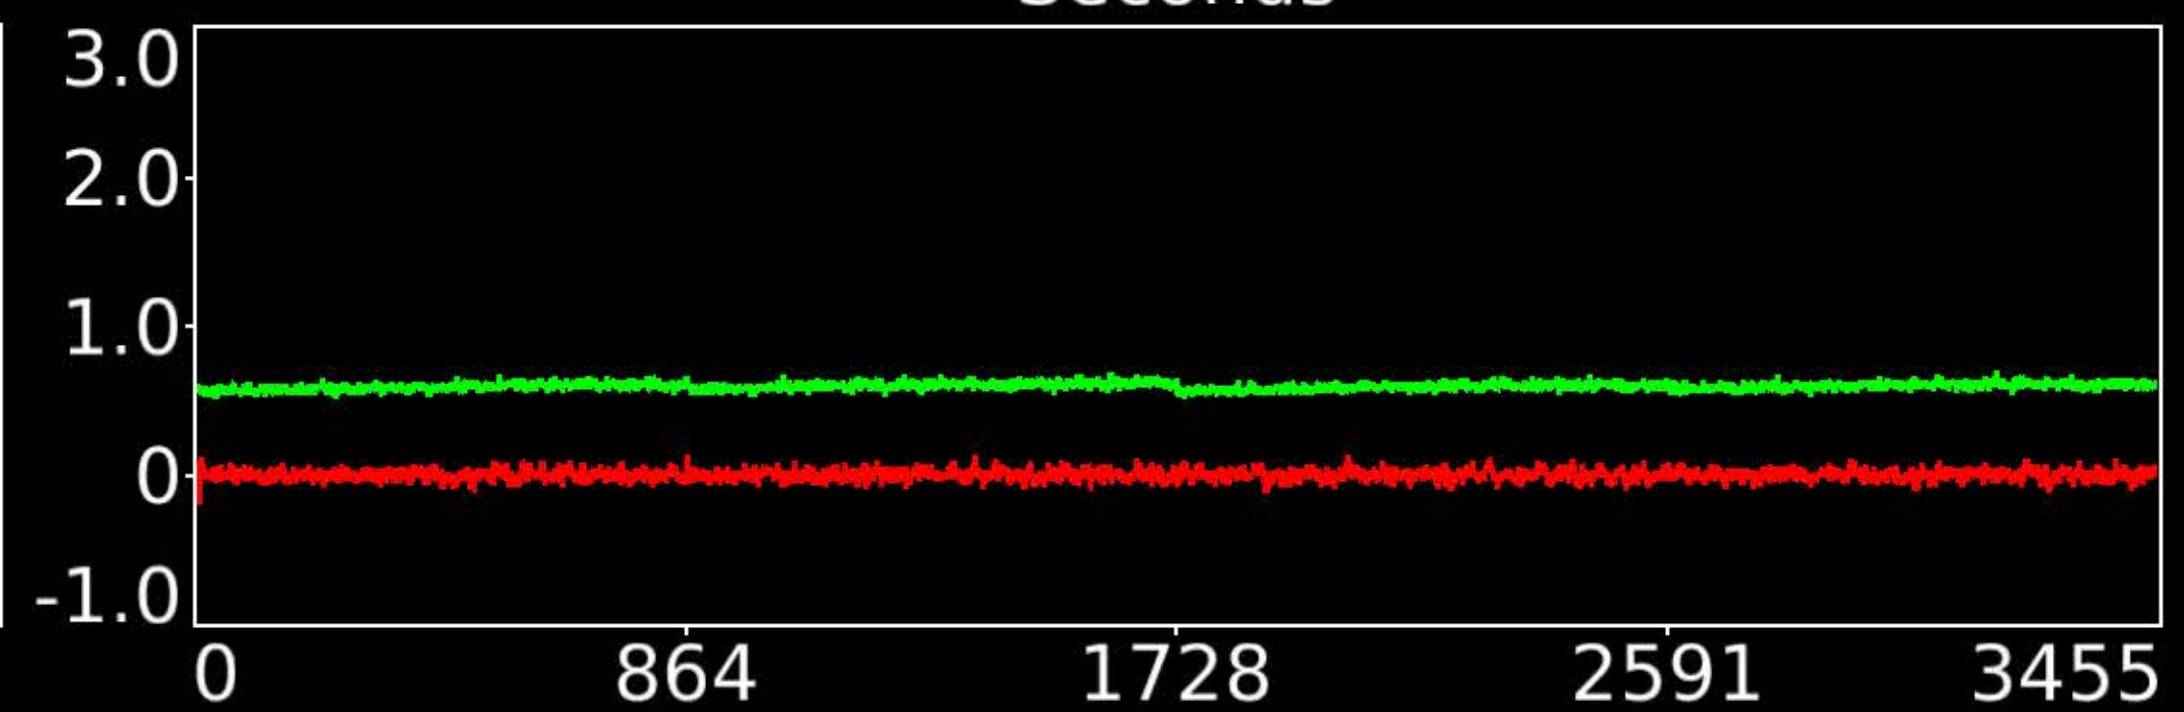

|                                                                                                      |                            |                                    |  |
|------------------------------------------------------------------------------------------------------|----------------------------|------------------------------------|--|
| Number & Class: 63 Noise                                                                             |                            | Name: Pons + L Thalamus > Amygdala |  |
| RVT Correlated: No                                                                                   | DVARS Dip Associated: No   | Cross-Subject Variable: No         |  |
| Single Subject: Yes                                                                                  | % Variance Explained: 0.54 | Globality Index: 0.01              |  |
| Task Component: No                                                                                   | Taskr Component: No        | Sleep Noted: No                    |  |
| Rationale: Controversial: Single subject component with spatial map dominated by subcortical patches |                            |                                    |  |



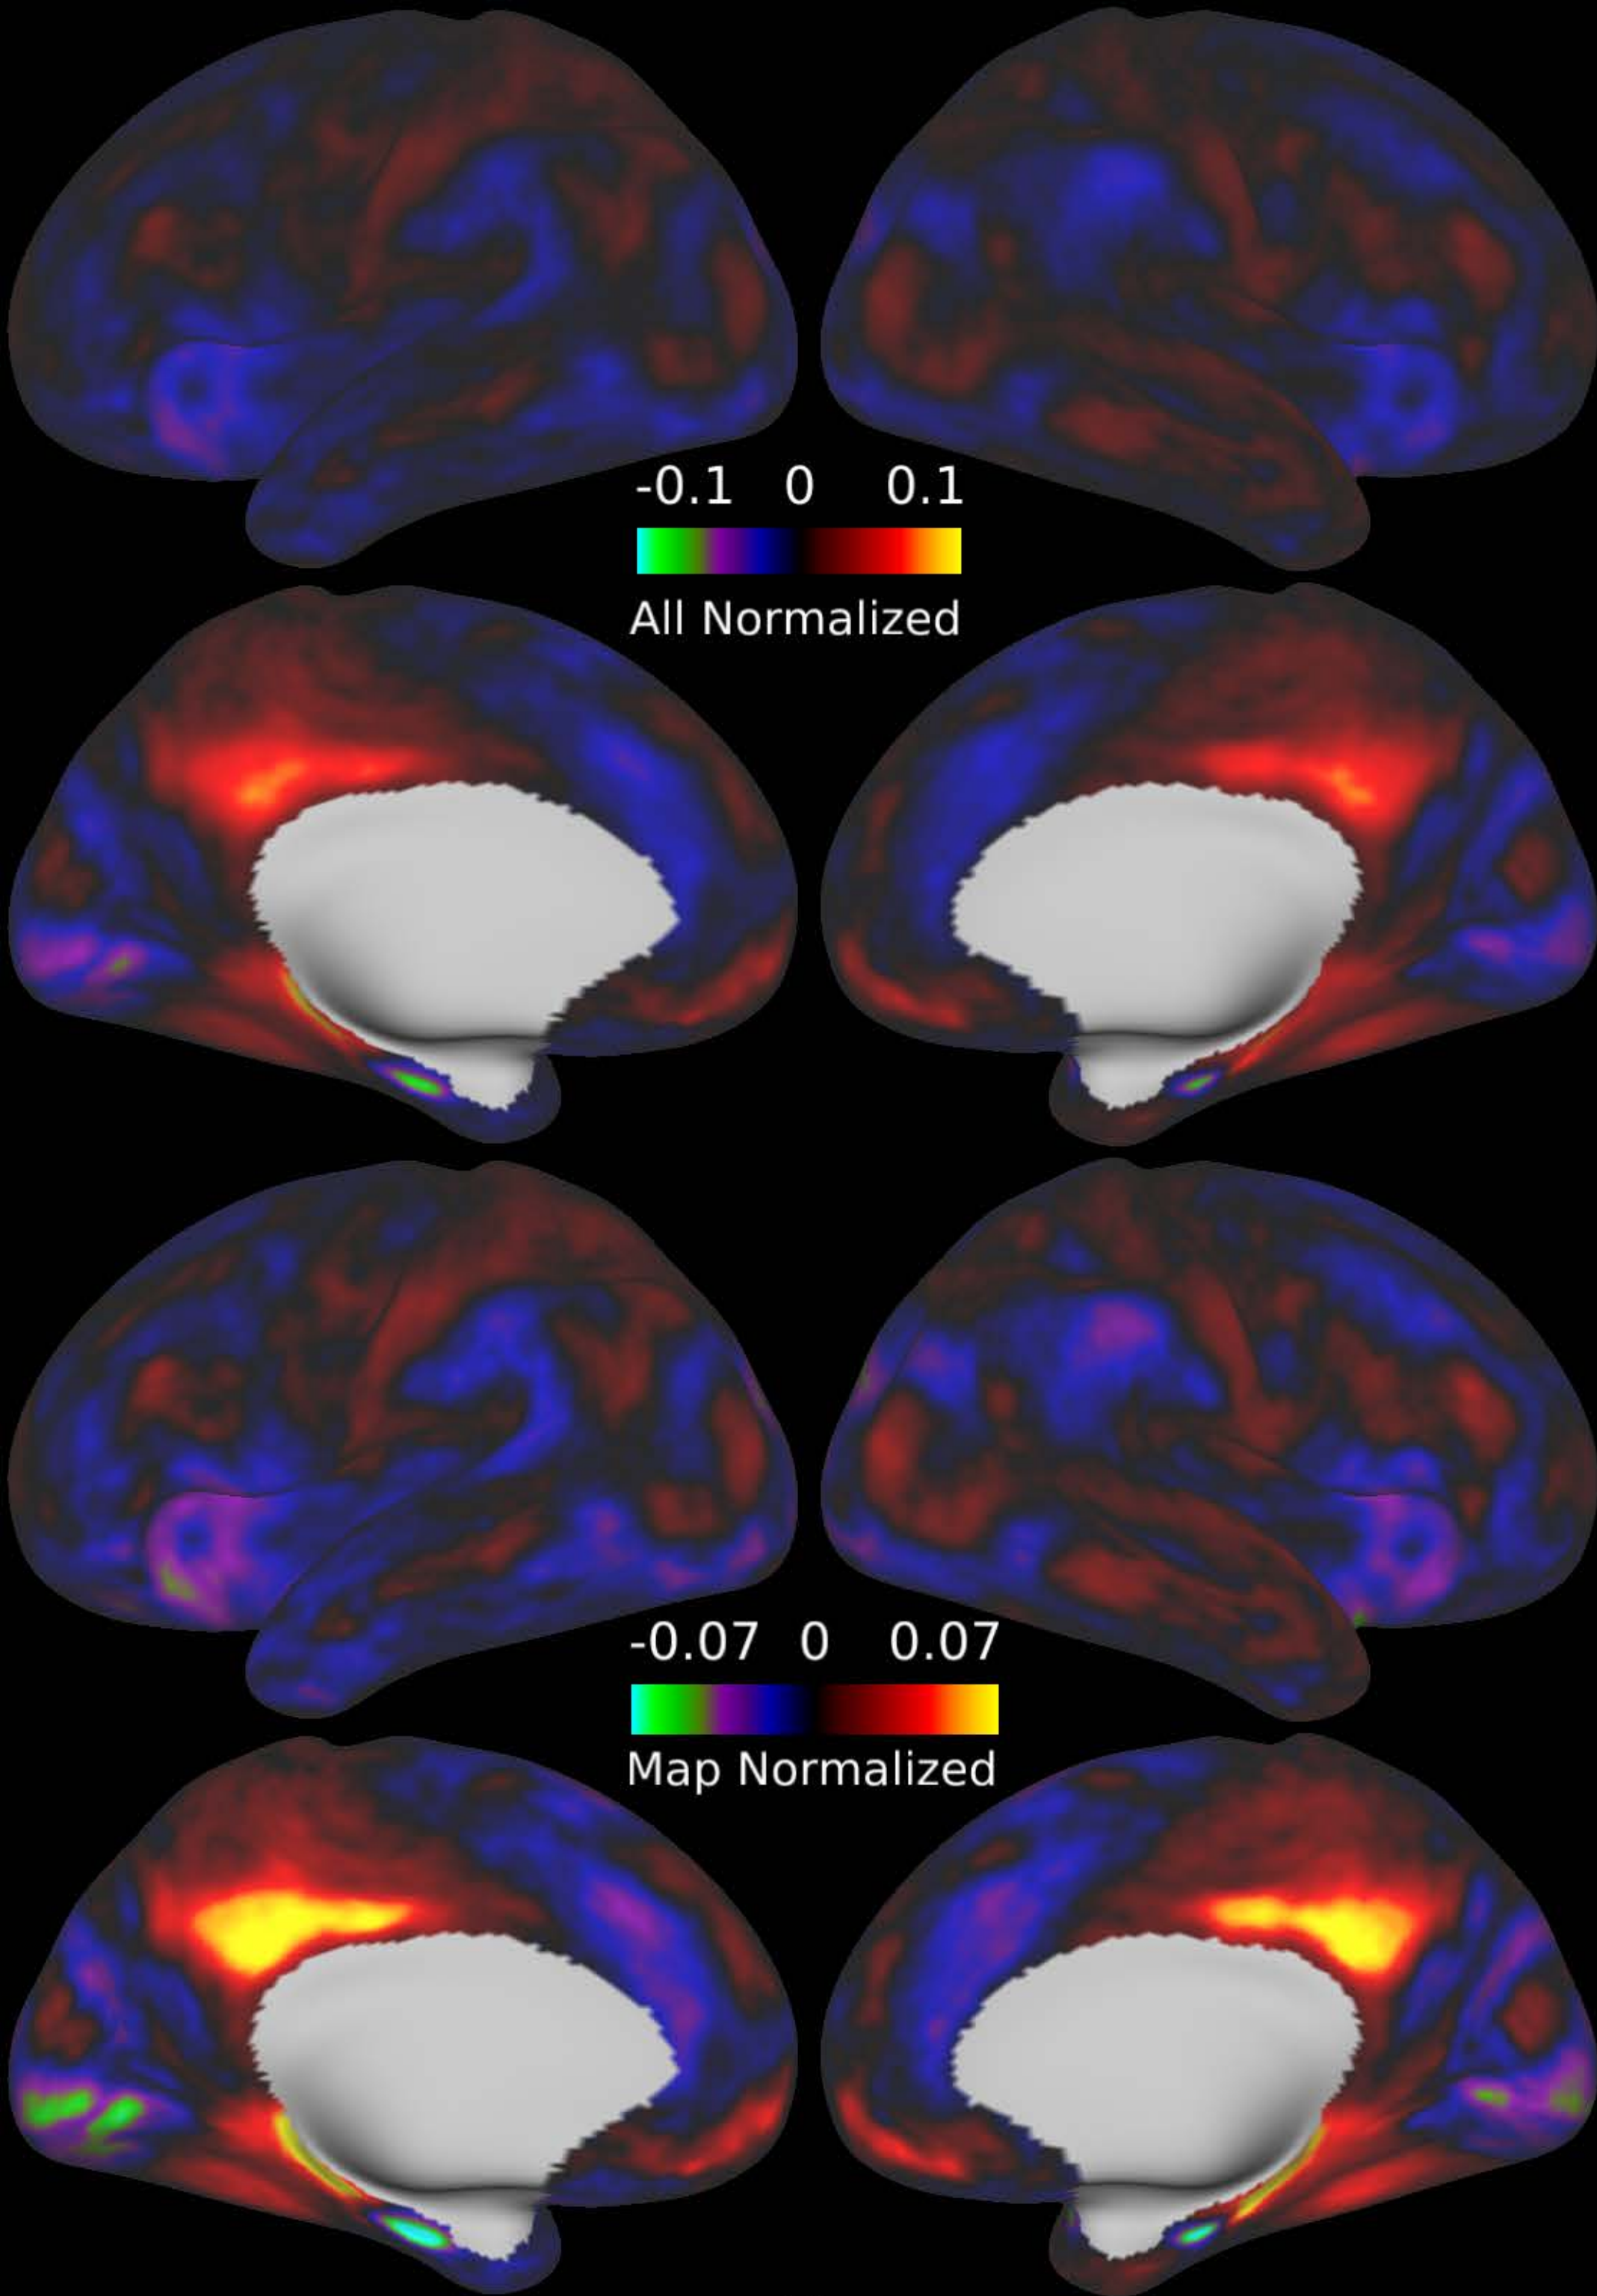

Hertz

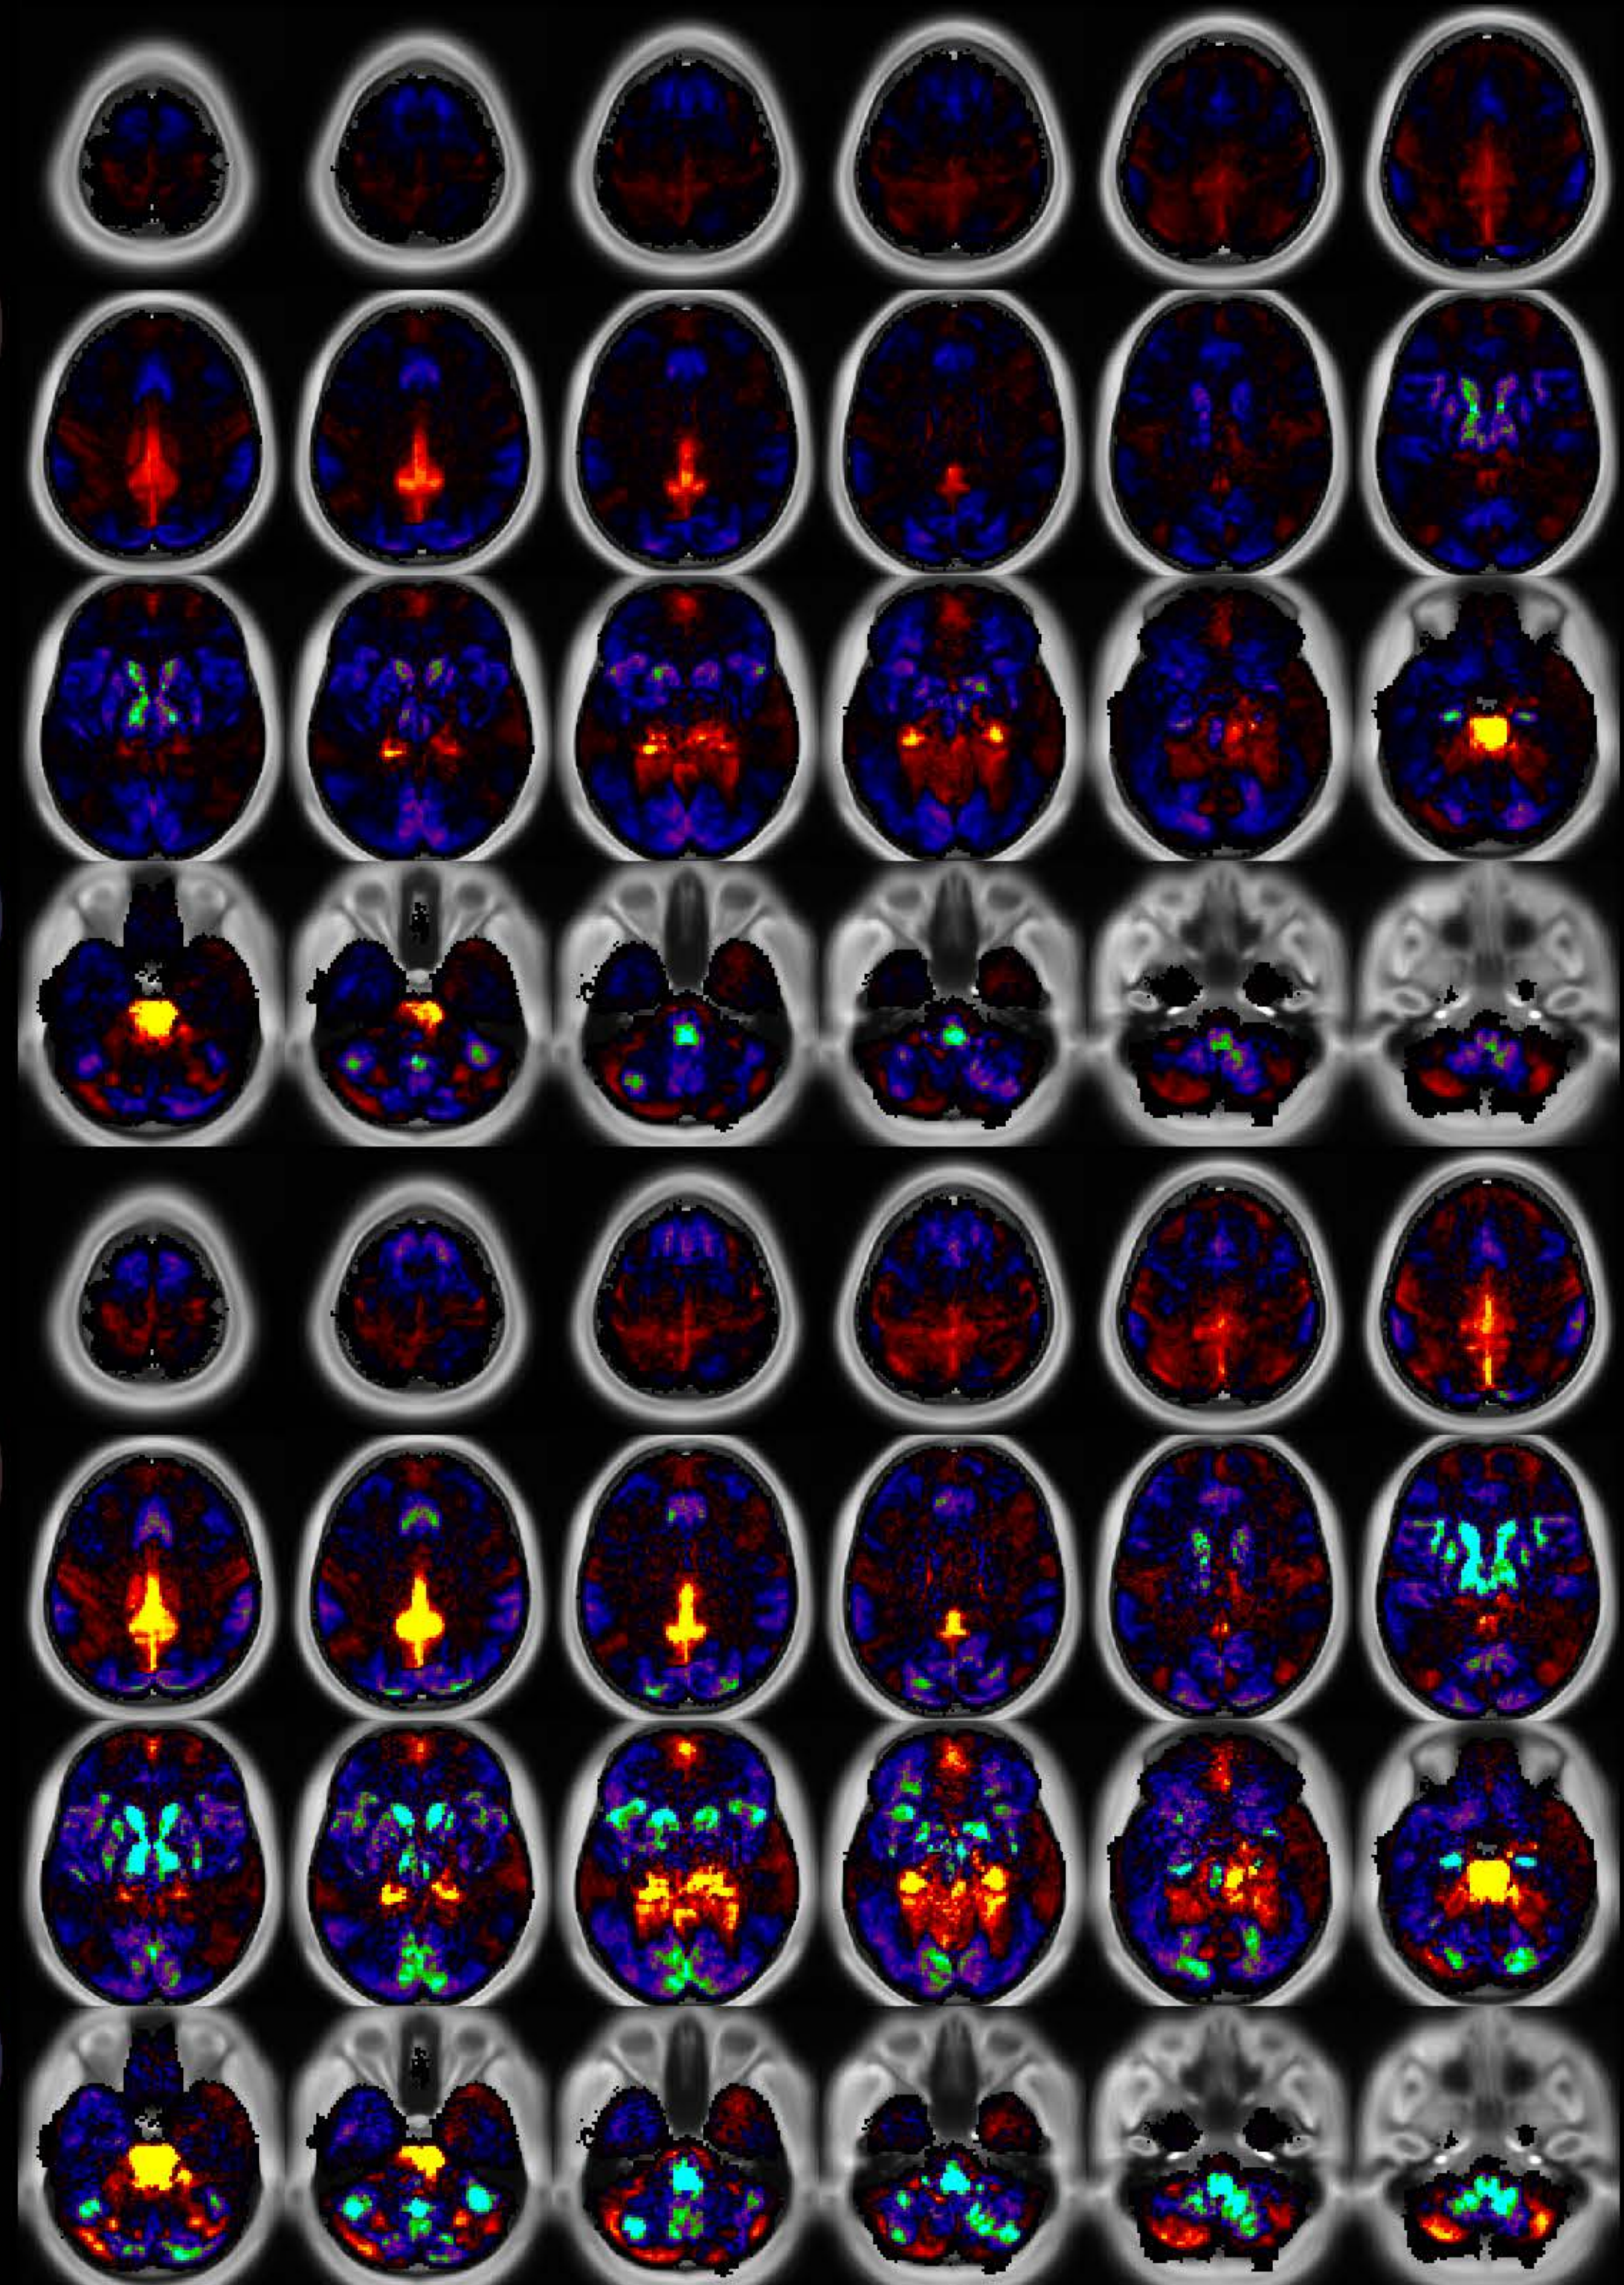

Seconds

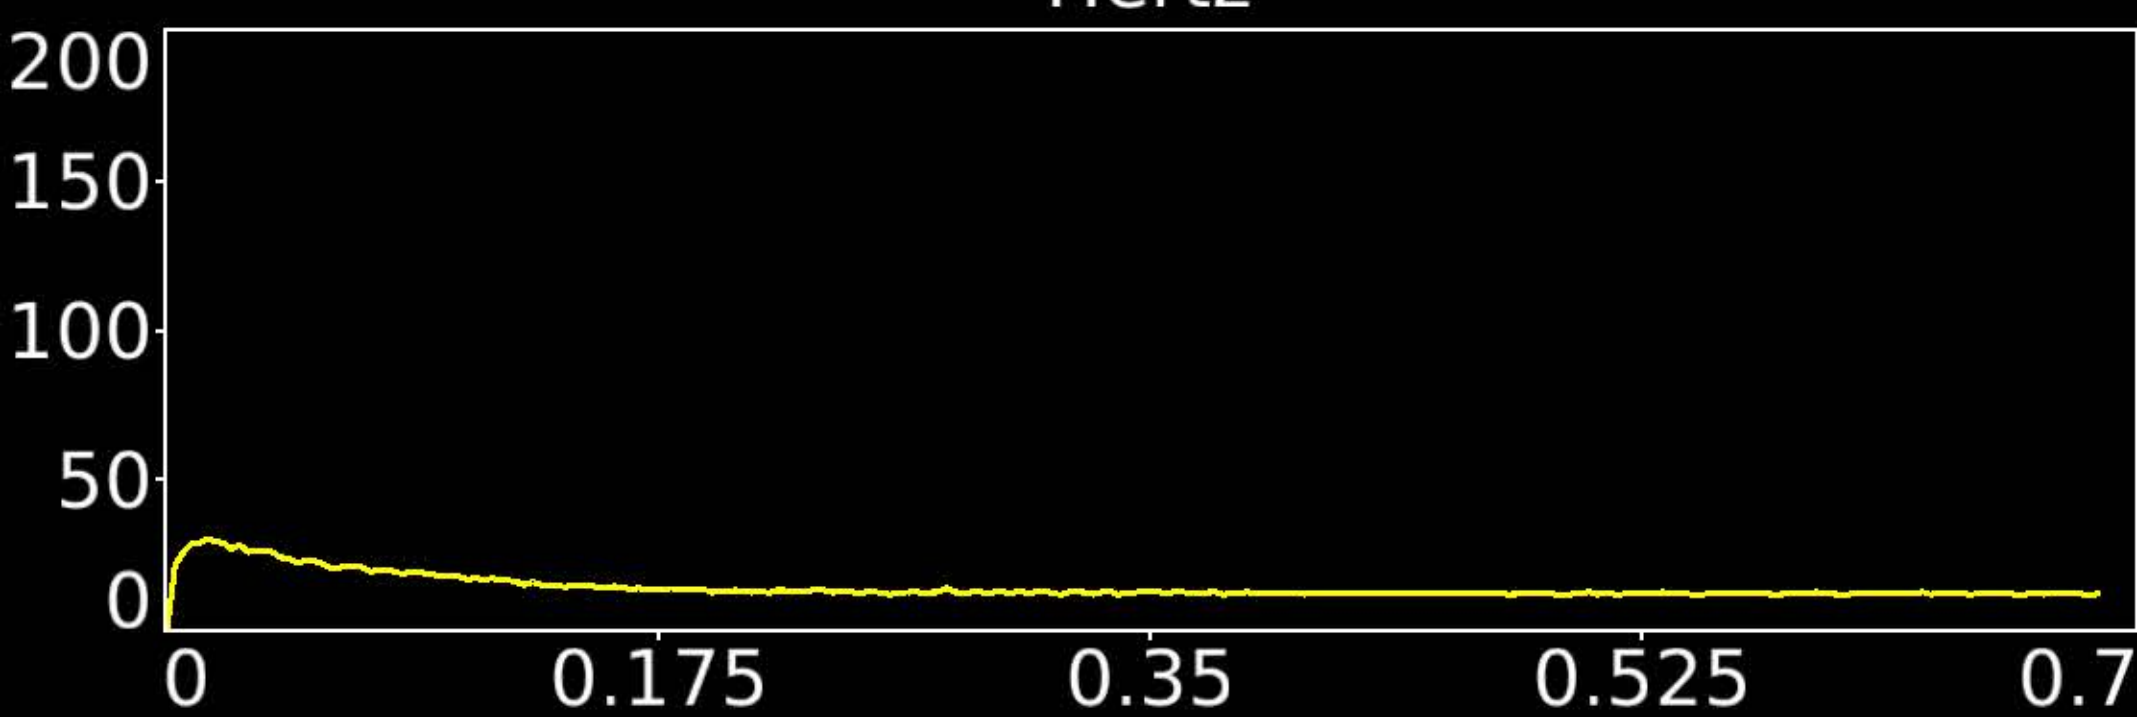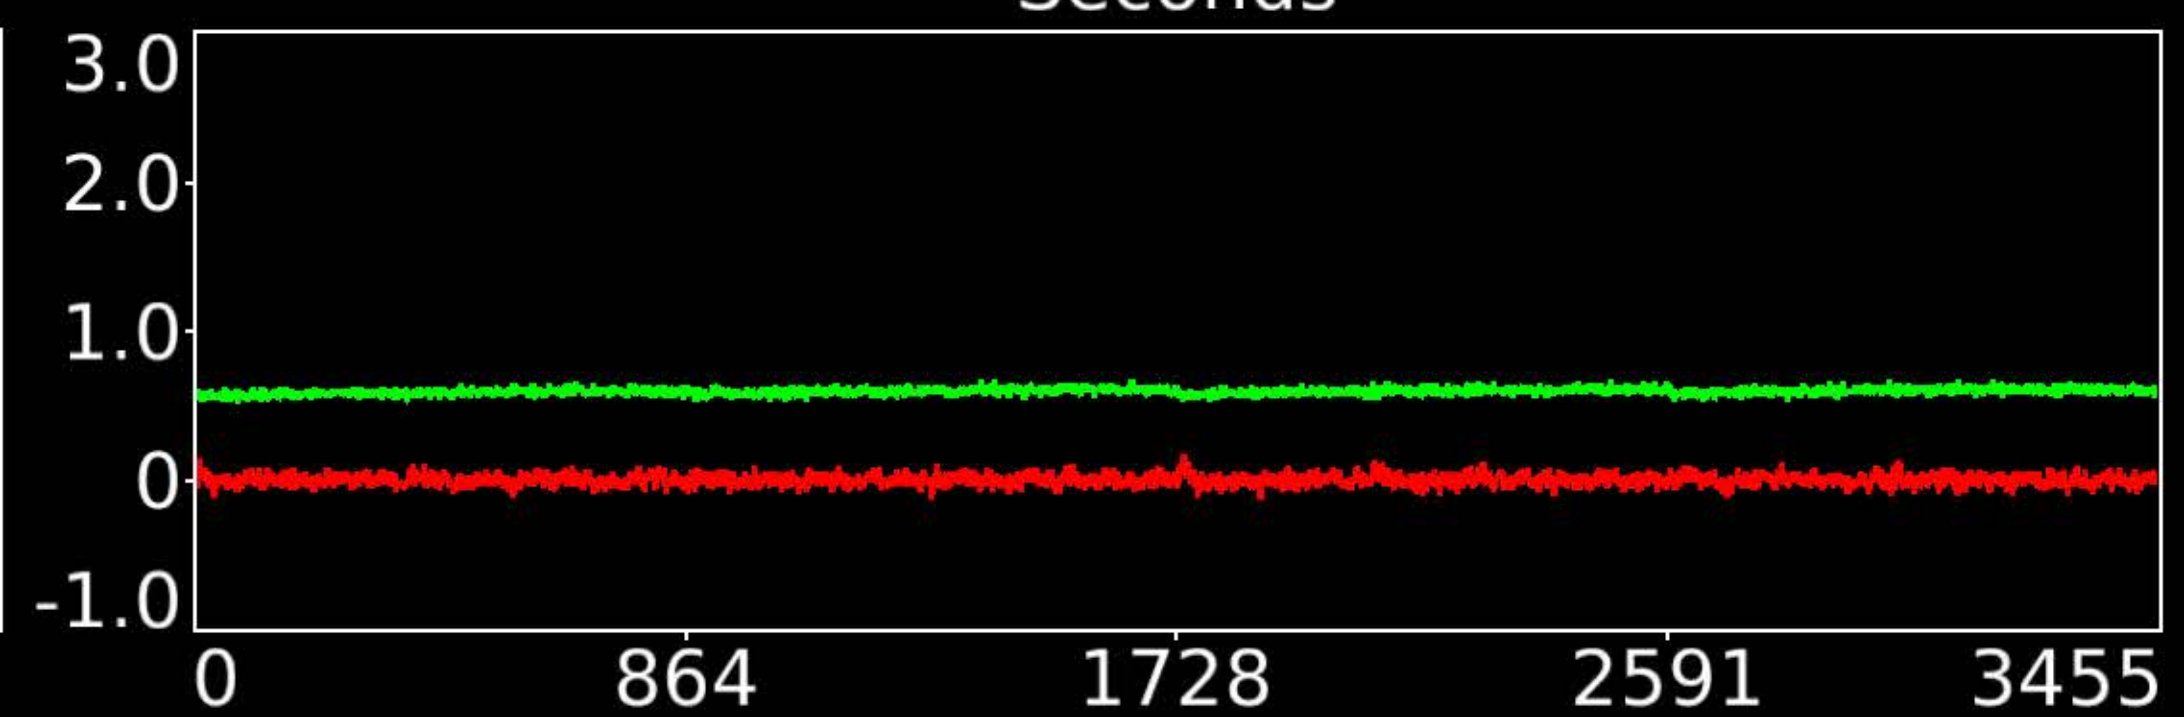

|                                                                                                             |                            |                            |  |
|-------------------------------------------------------------------------------------------------------------|----------------------------|----------------------------|--|
| Number & Class: 64 Noise                                                                                    |                            | Name: Recon Artifact?      |  |
| RVT Correlated: No                                                                                          | DVARS Dip Associated: No   | Cross-Subject Variable: No |  |
| Single Subject: Yes                                                                                         | % Variance Explained: 0.54 | Globality Index: 0.42      |  |
| Task Component: No                                                                                          | Taskr Component: No        | Sleep Noted: No            |  |
| Rationale: Single subject component with banding in sagittal plane; potentially a multi-band recon artifact |                            |                            |  |



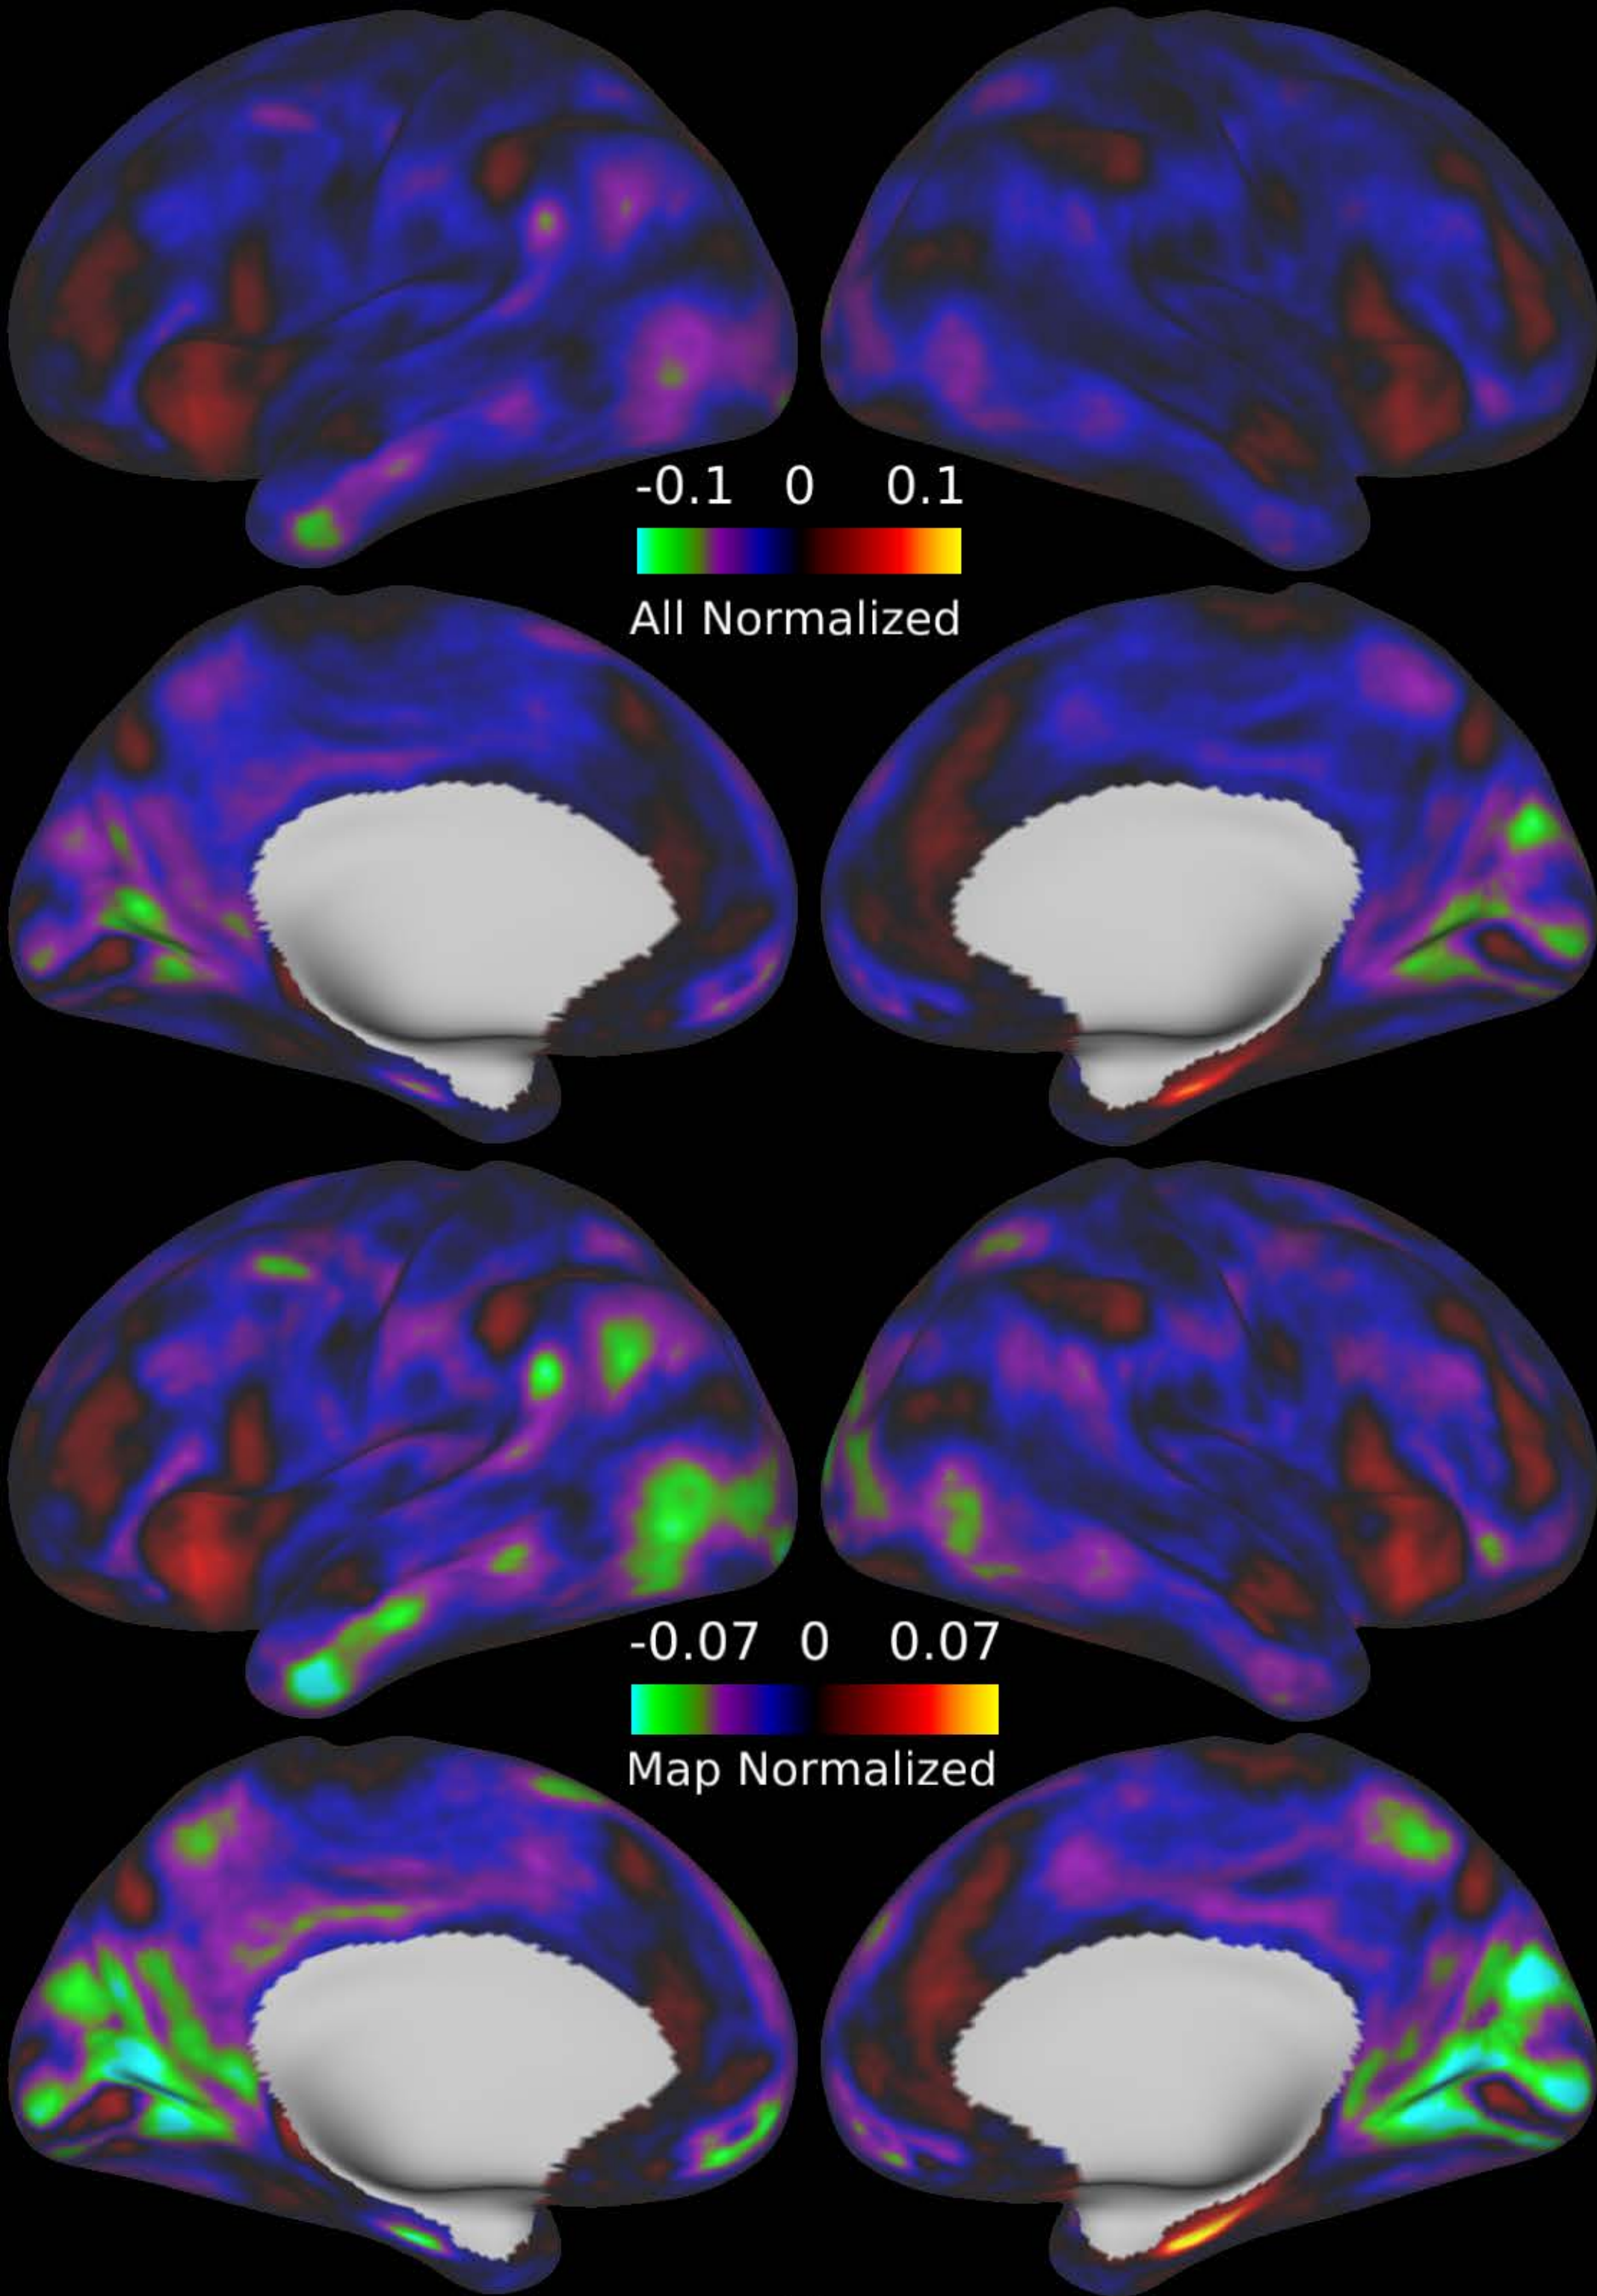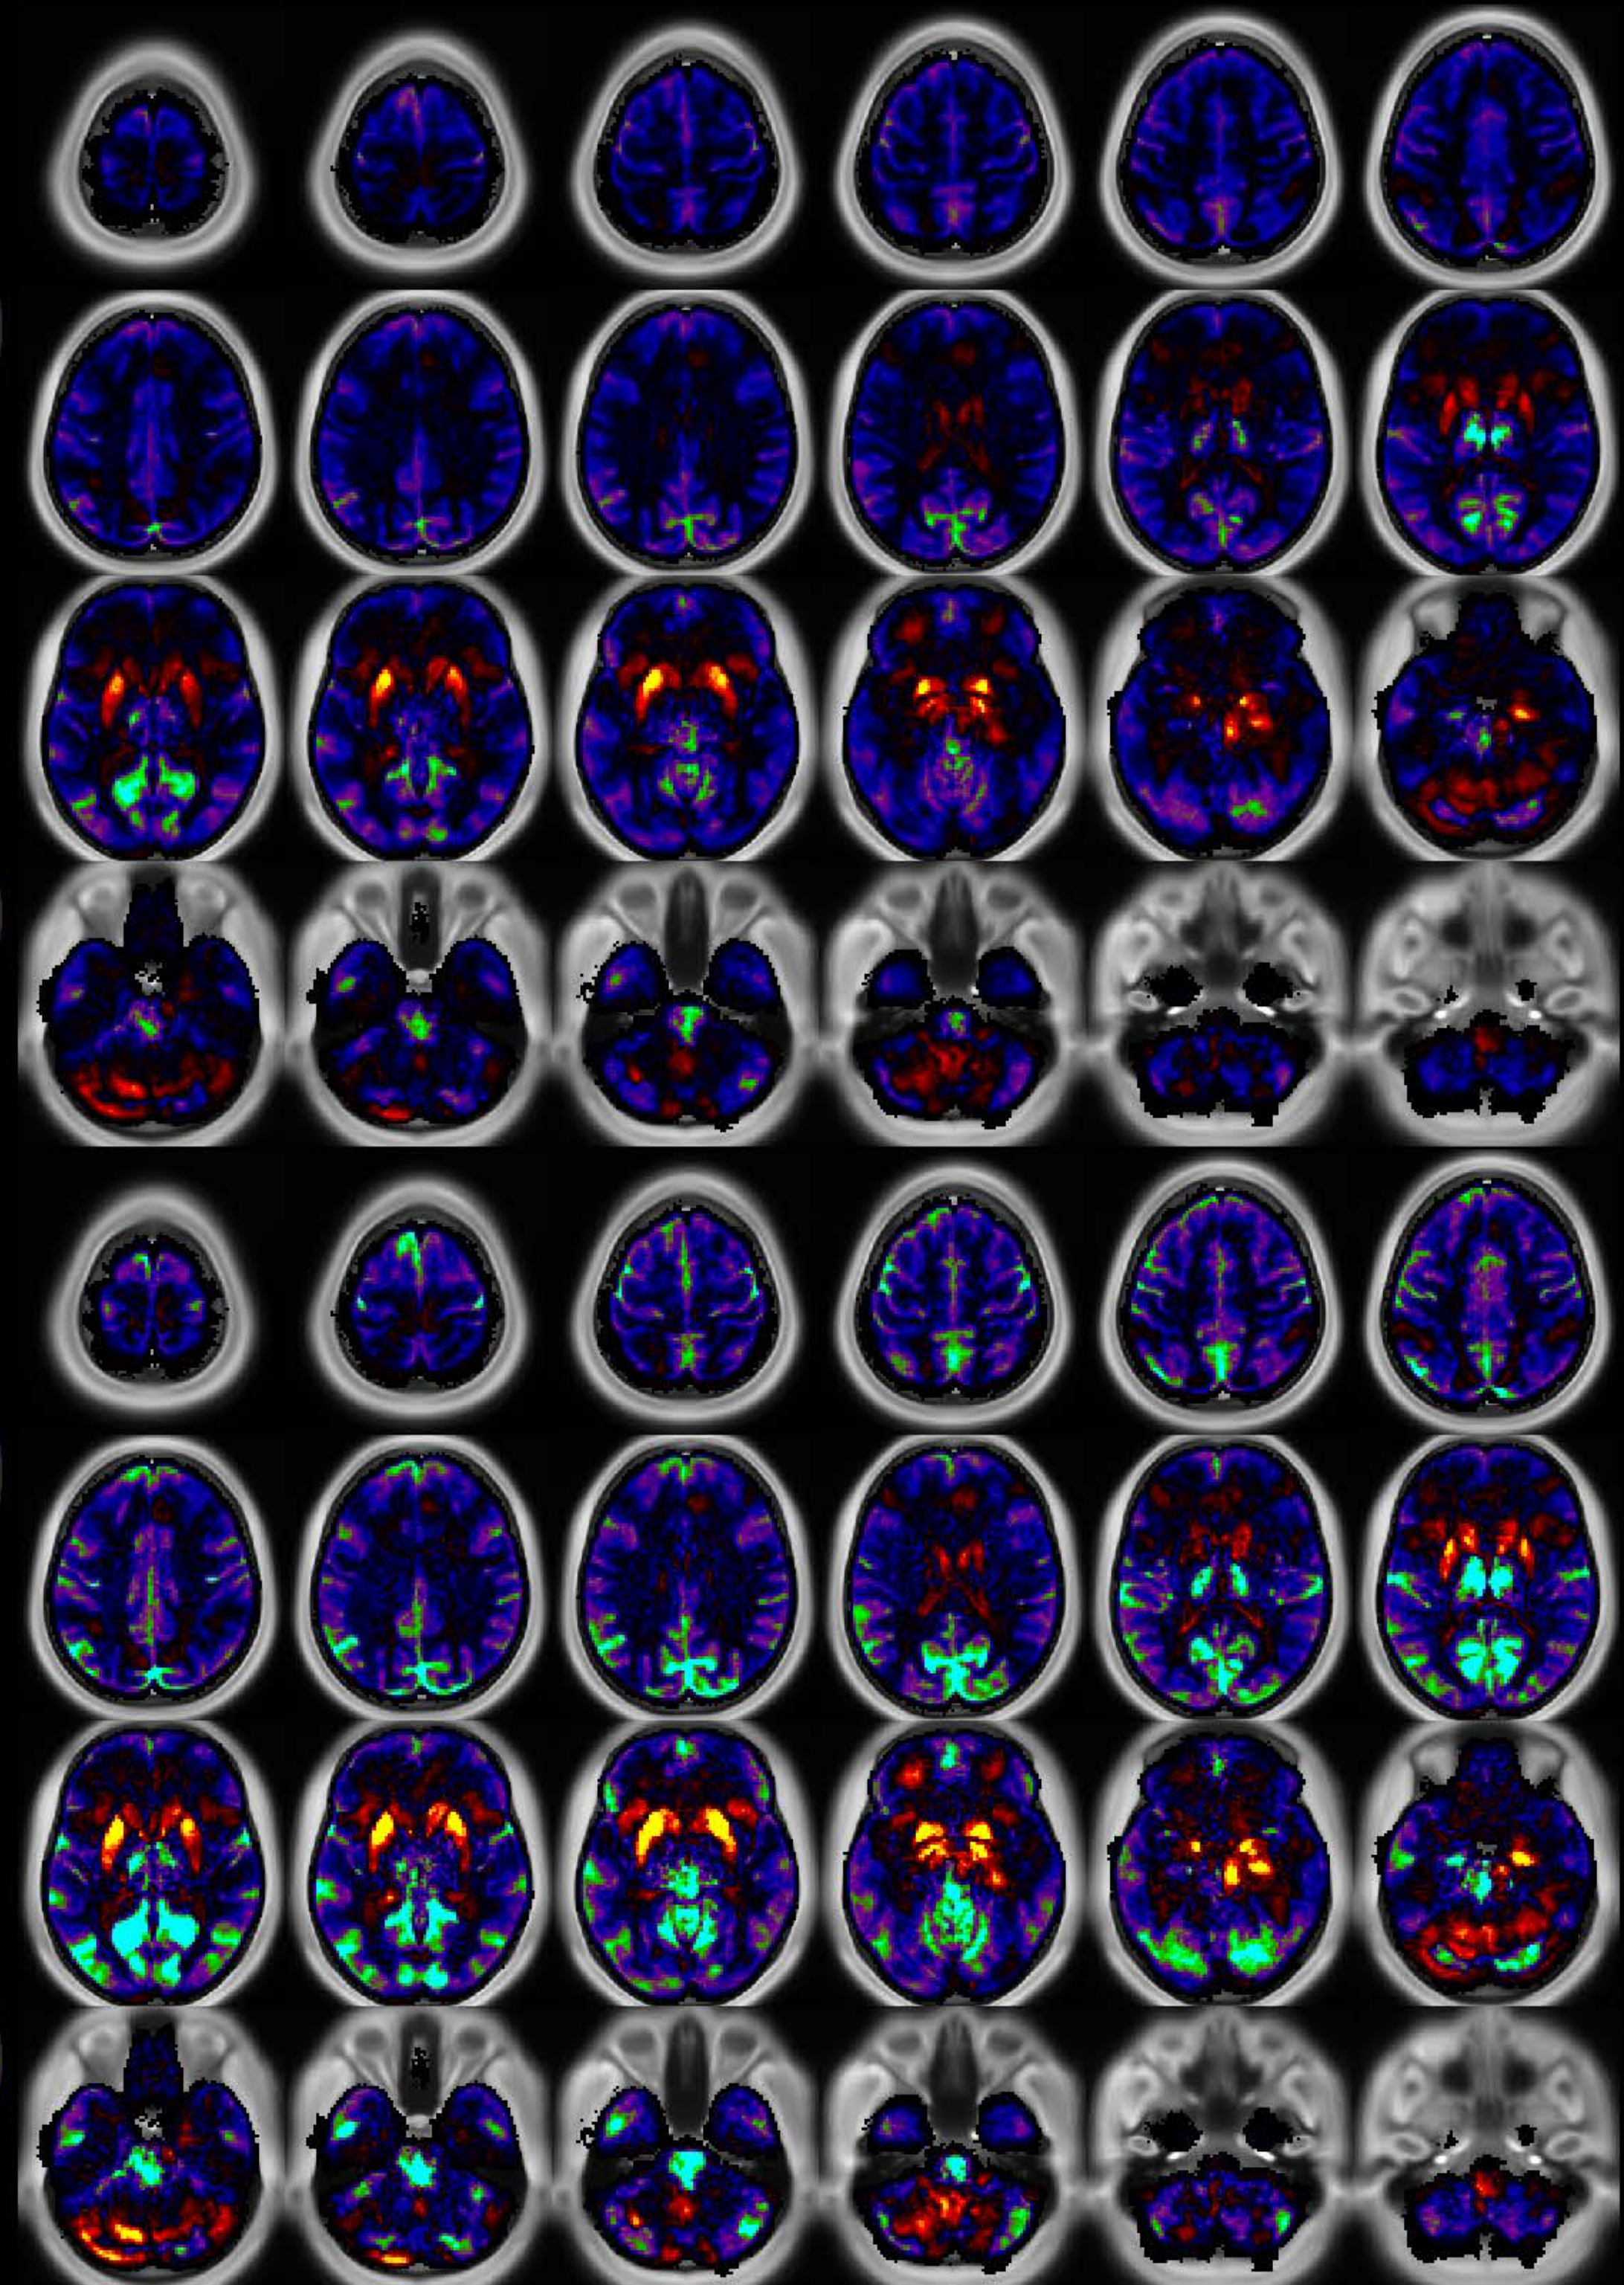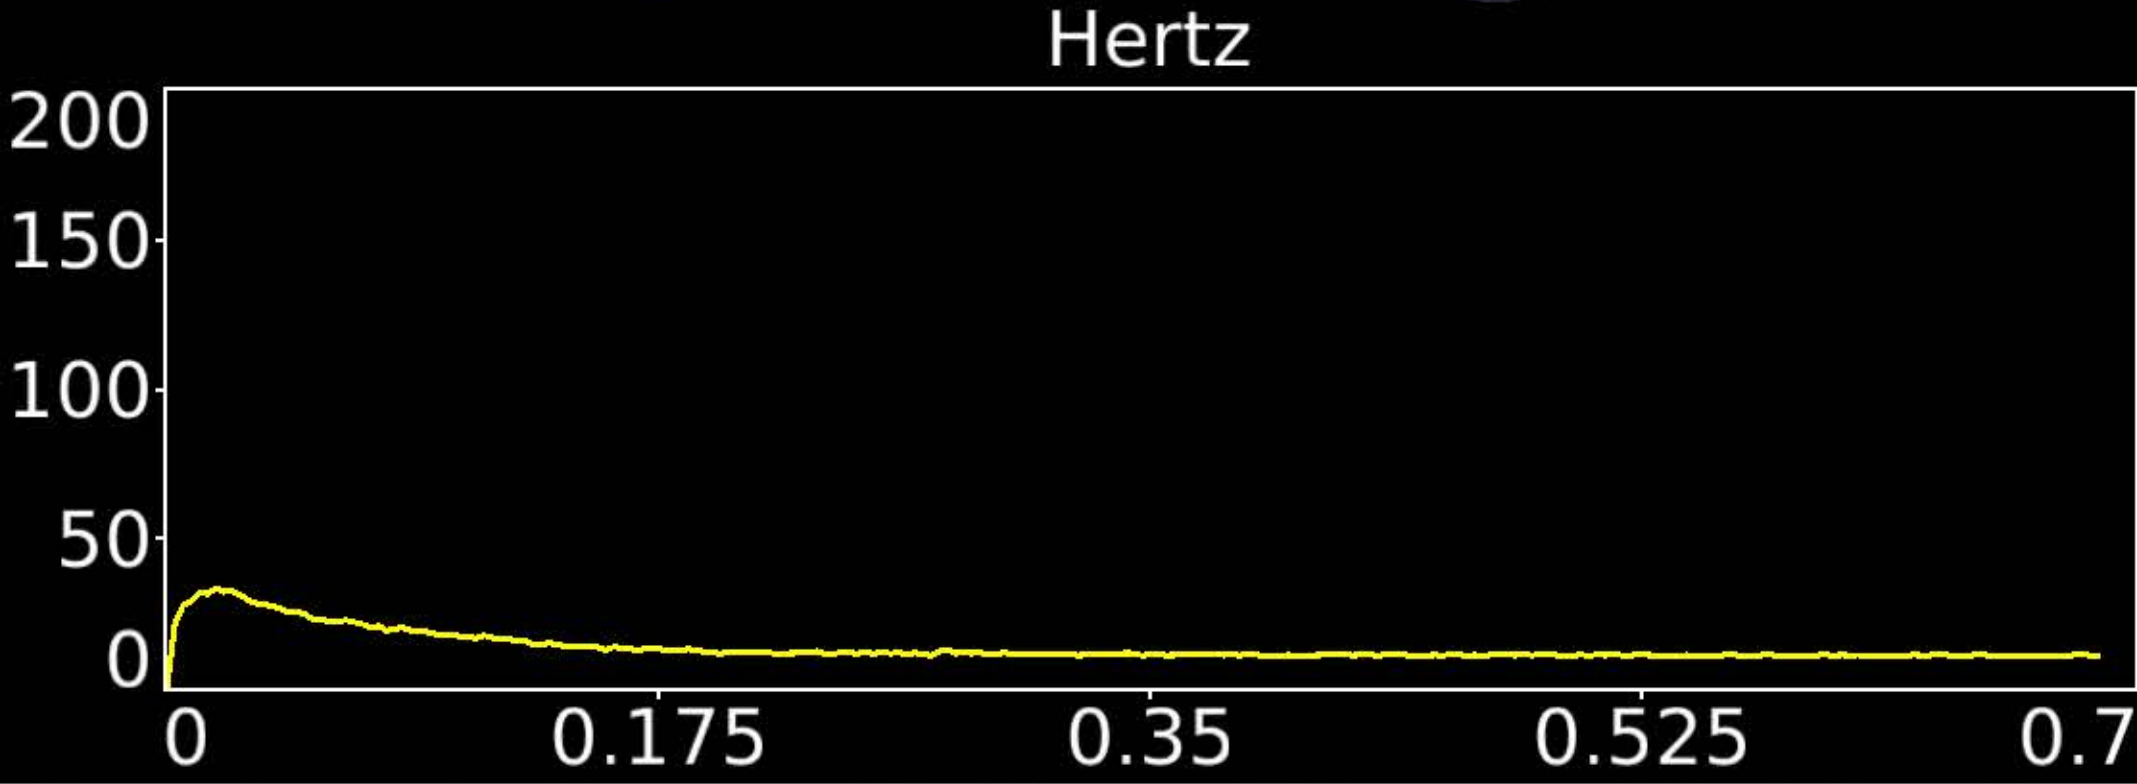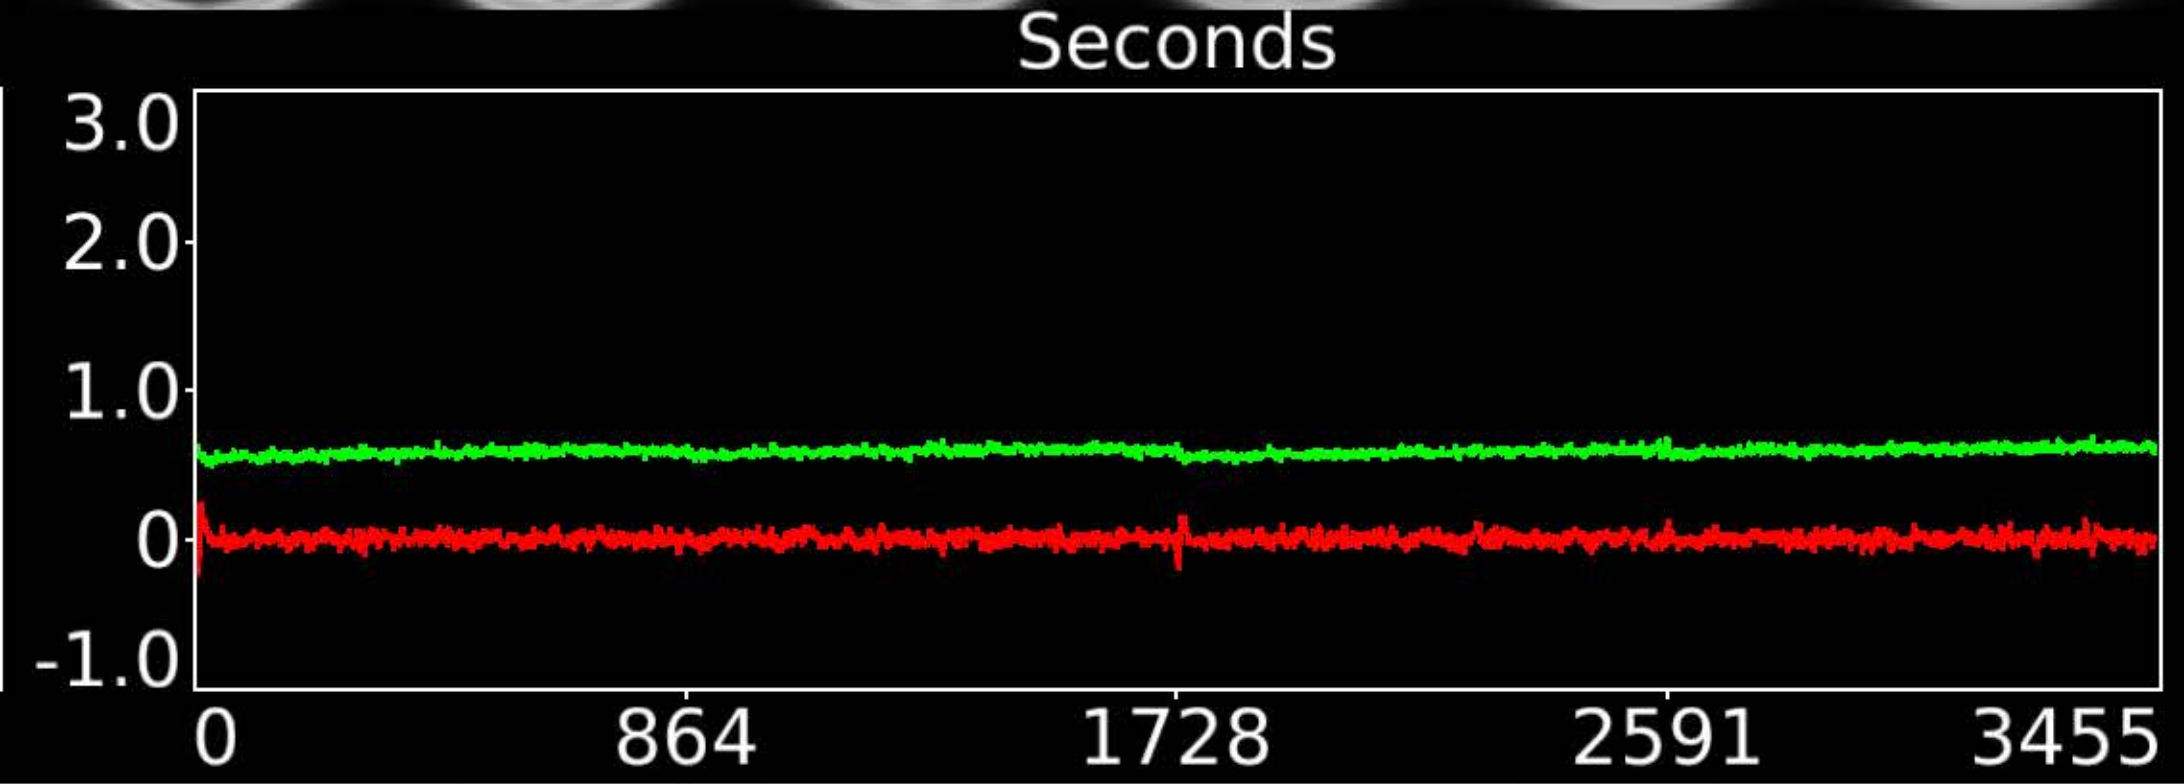

|                           |                            |                                                         |  |
|---------------------------|----------------------------|---------------------------------------------------------|--|
| Number & Class: 65 Signal |                            | Name: Highly Globally Correlated Single Subject: Sleep? |  |
| RVT Correlated: No        | DVARS Dip Associated: No   | Cross-Subject Variable: No                              |  |
| Single Subject: Yes       | % Variance Explained: 0.54 | Globality Index: 1.57                                   |  |
| Task Component: No        | Taskr Component: No        | Sleep Noted: No                                         |  |

Rationale: Controversial: Single subject component with high correlation to global timecourse; looked more like RC1 than global noise components)



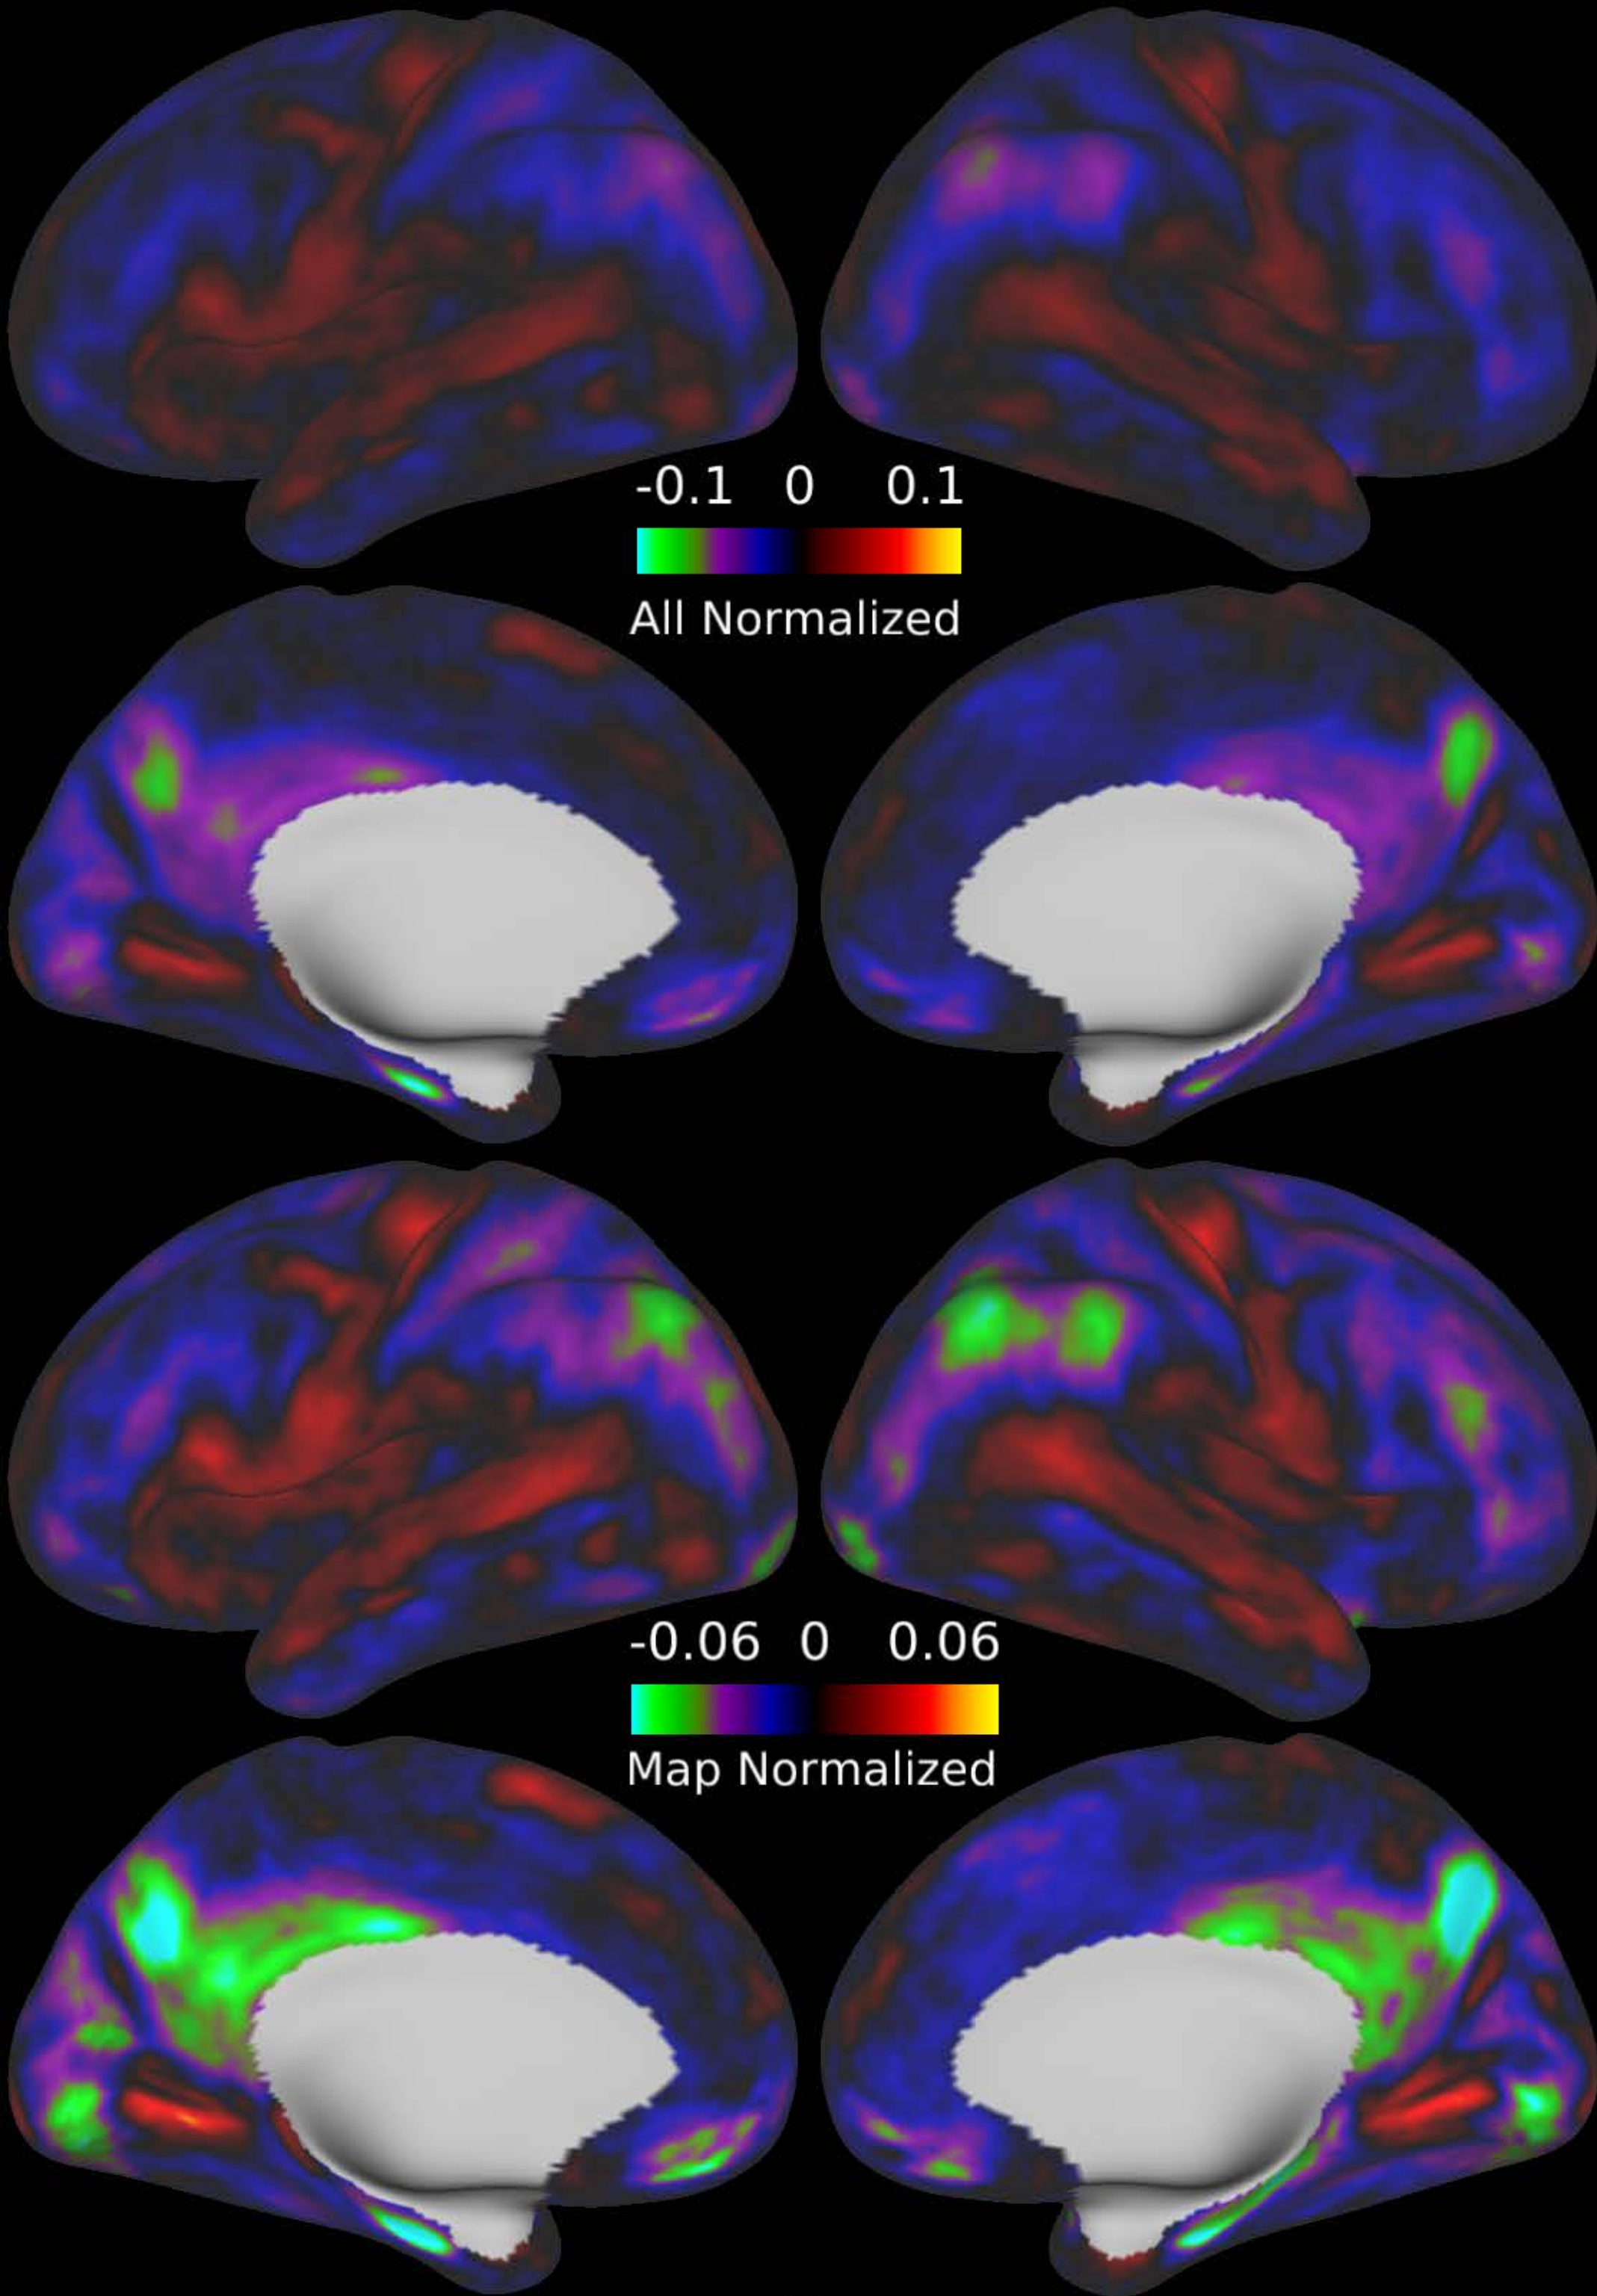

Hertz

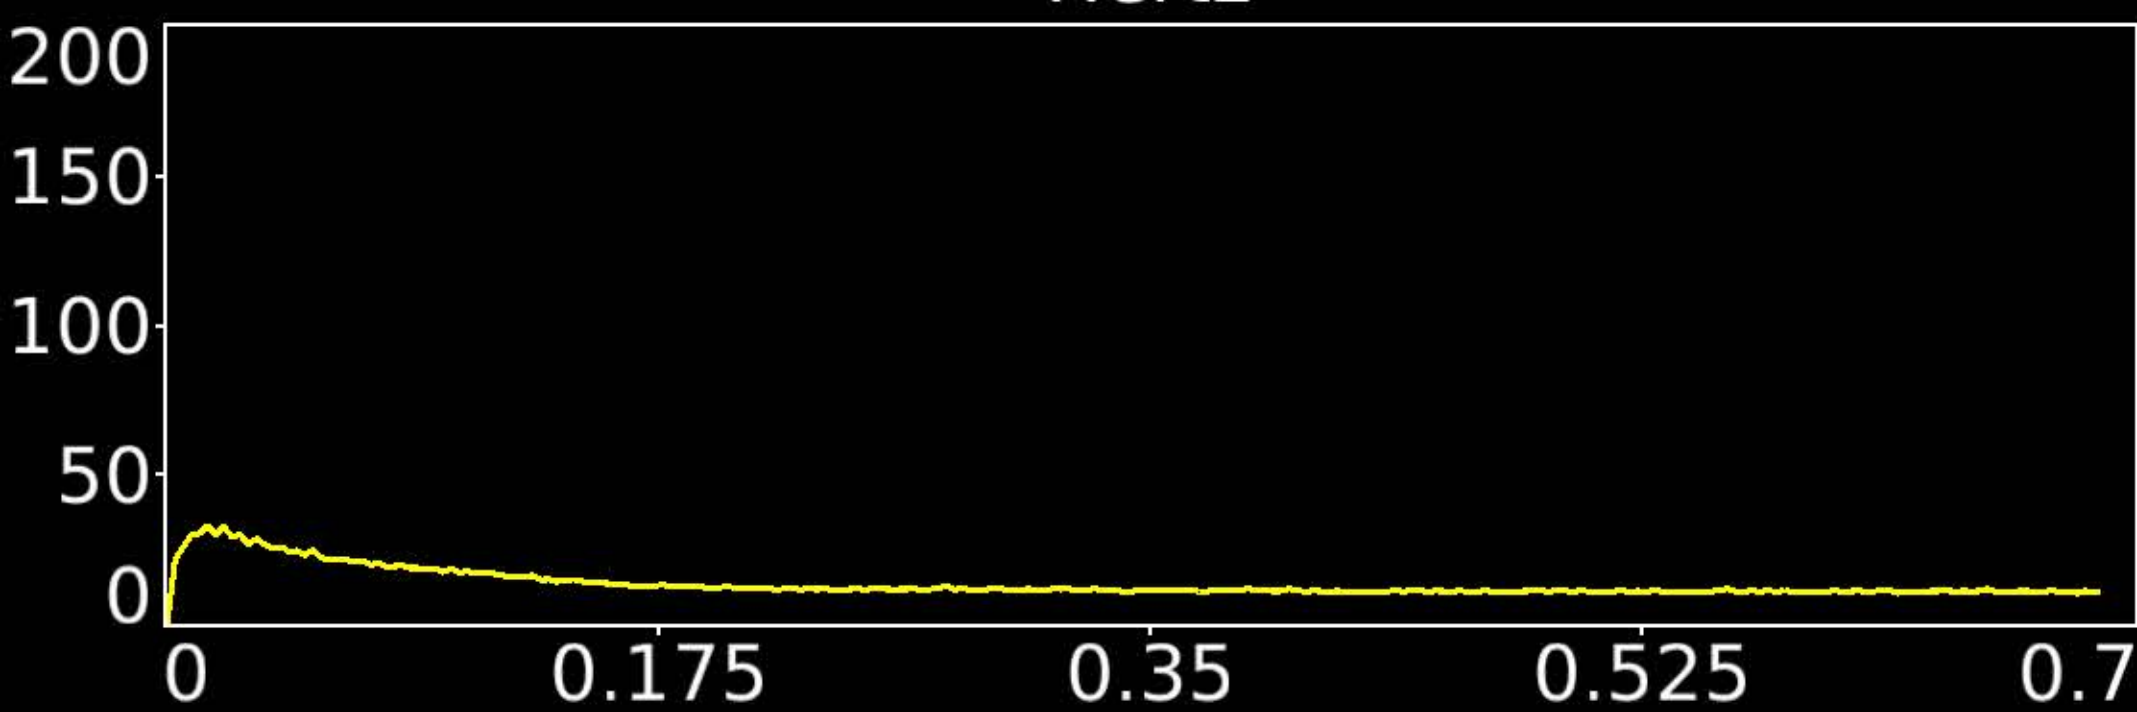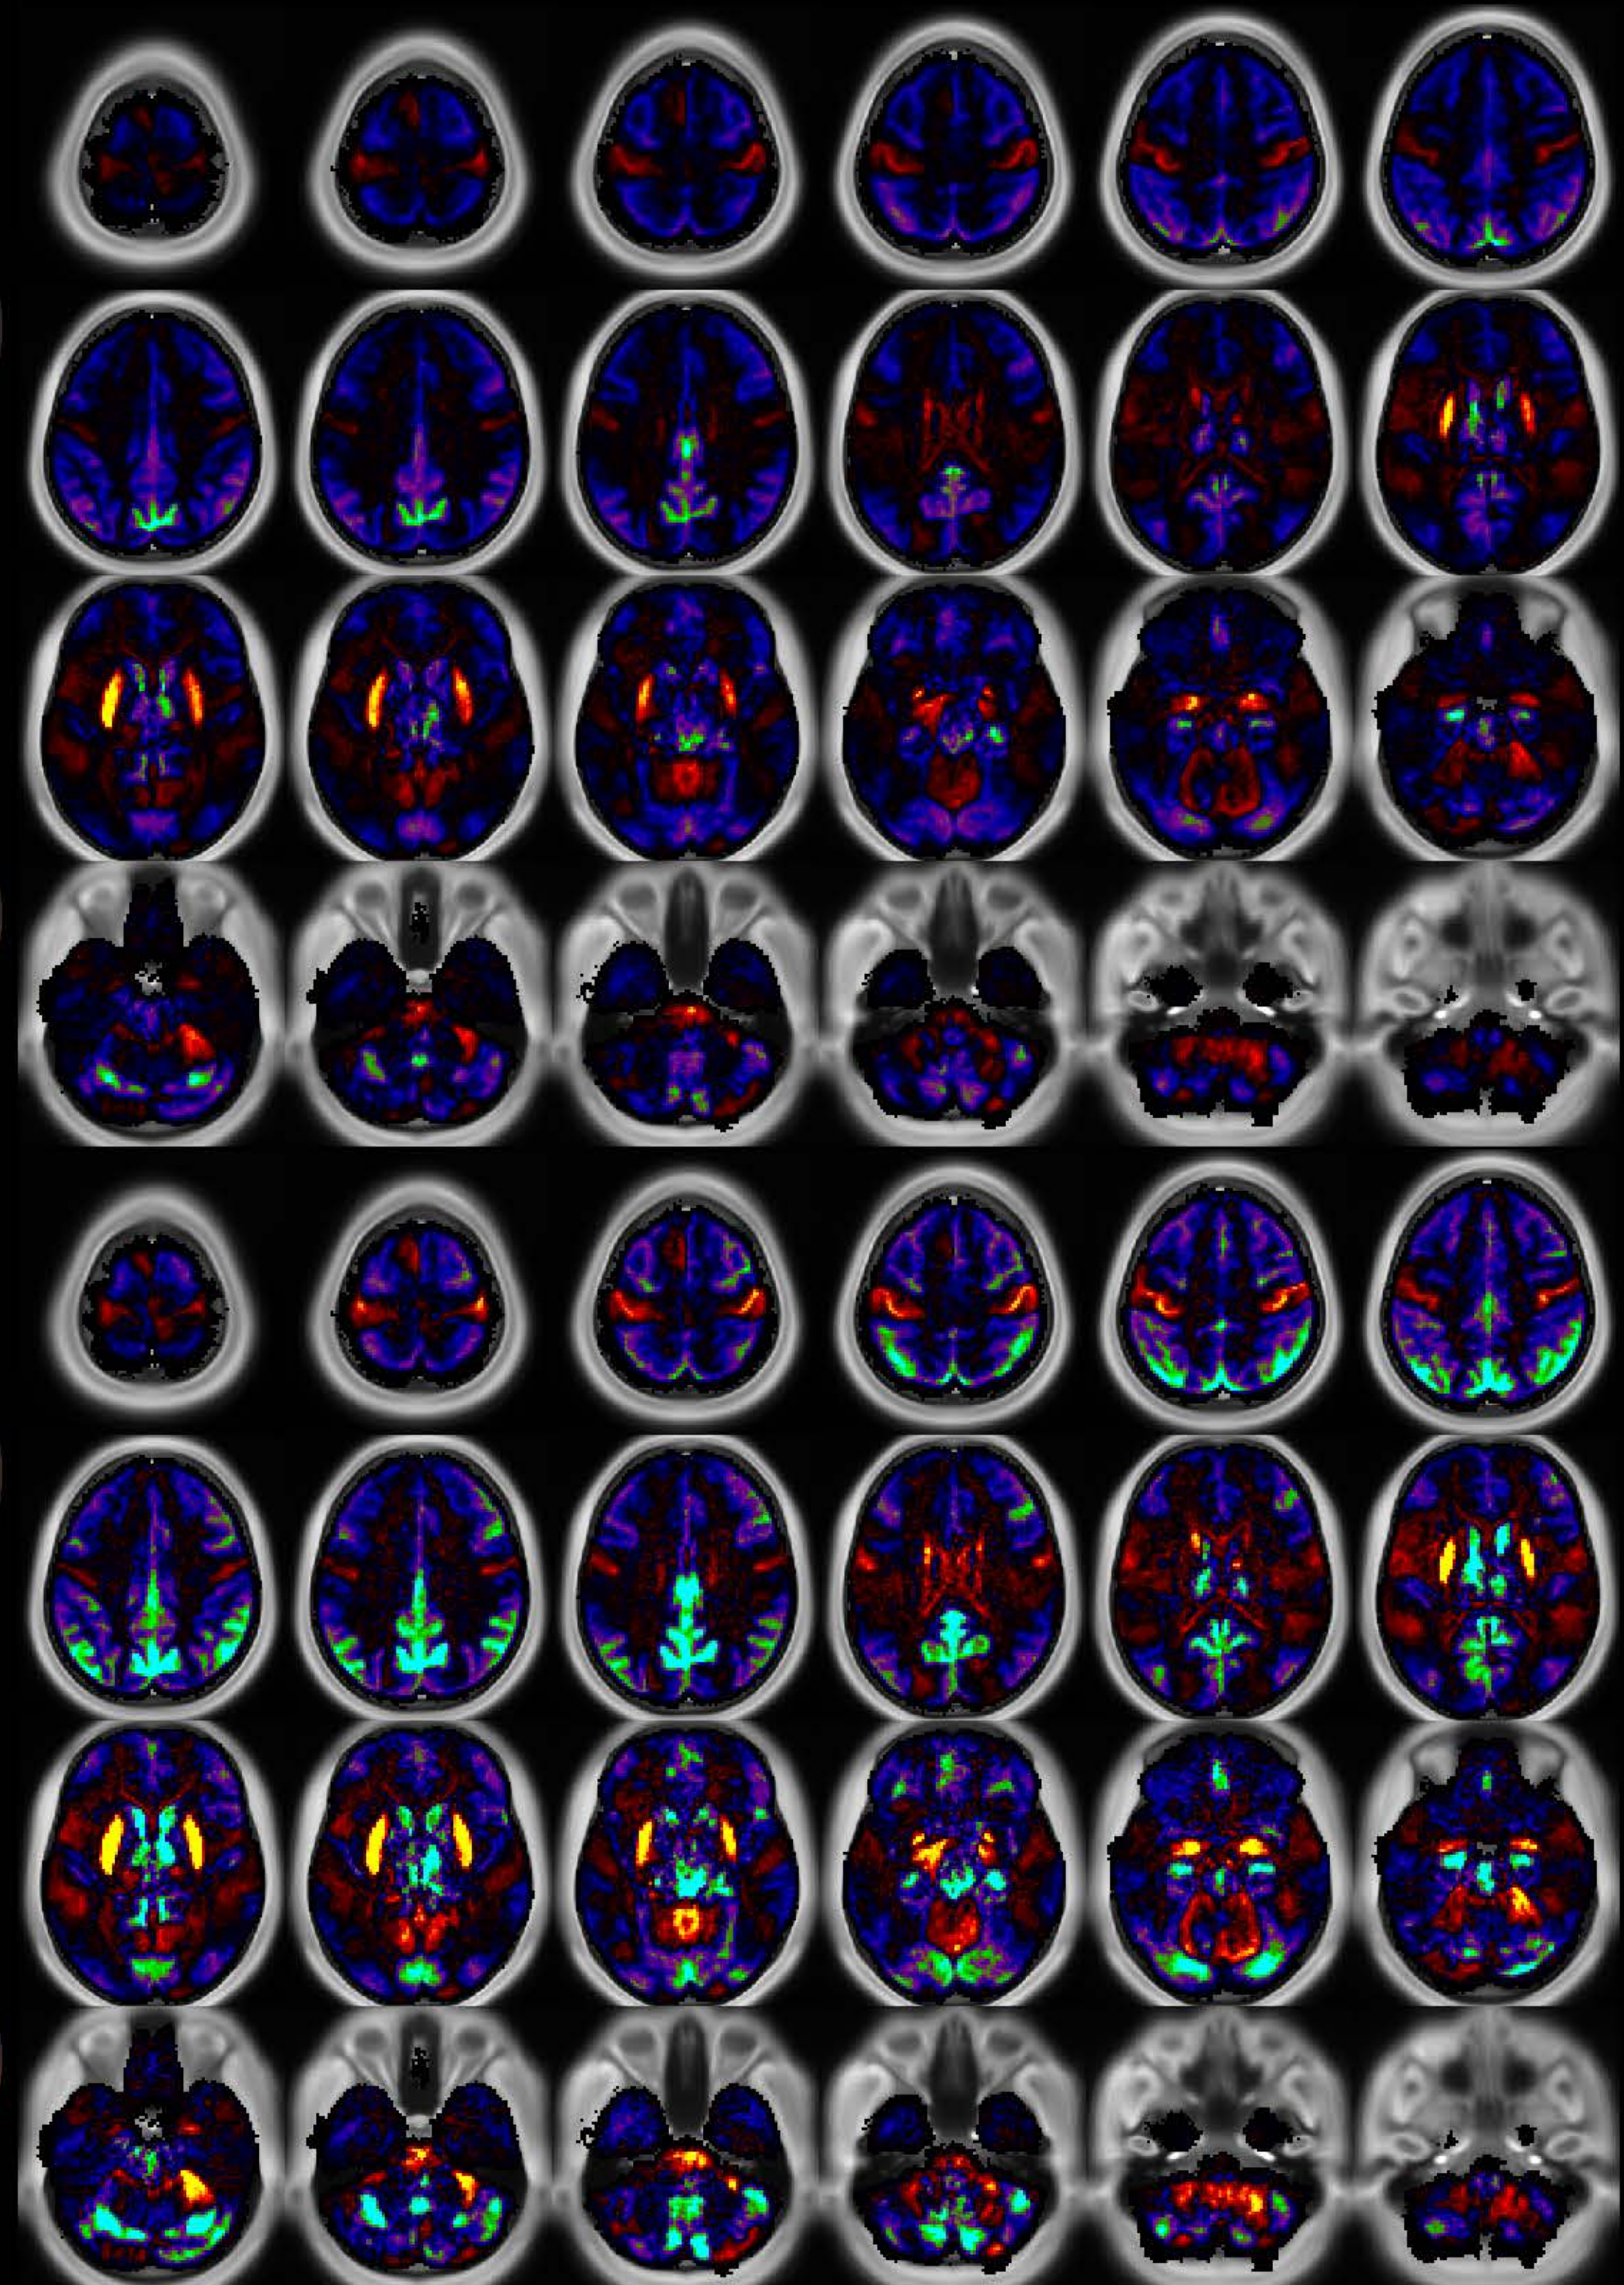

Seconds

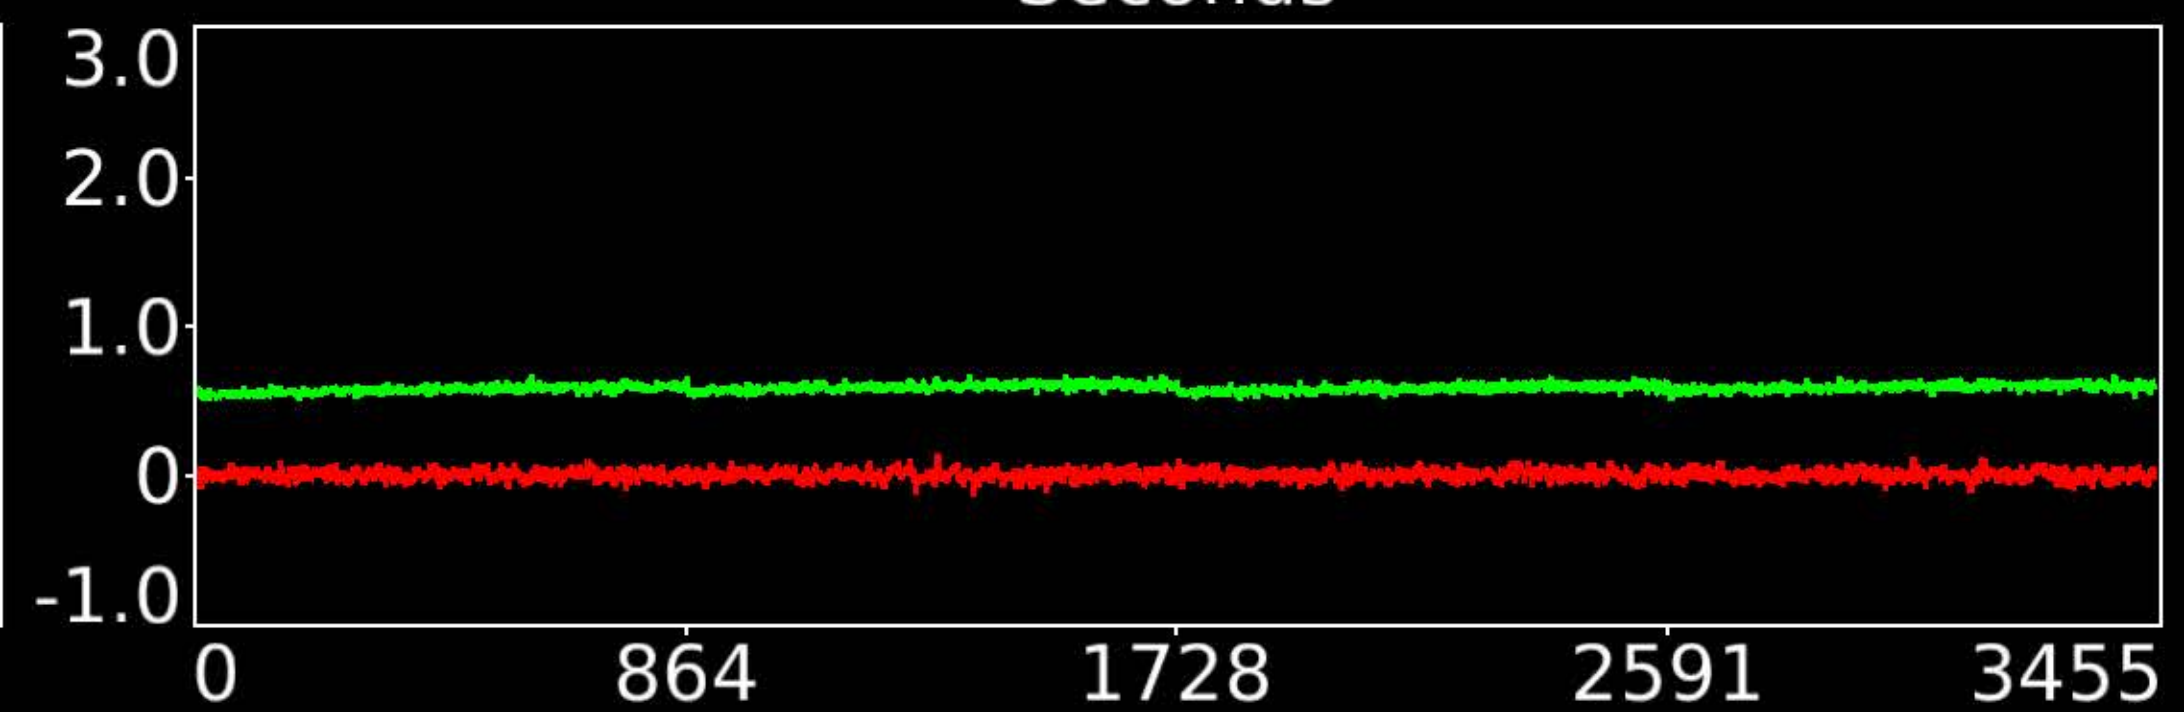

|                                                                                |                            |                                                 |  |
|--------------------------------------------------------------------------------|----------------------------|-------------------------------------------------|--|
| Number & Class: 66 Noise                                                       |                            | Name: Single Subject Global Physiological Noise |  |
| RVT Correlated: No                                                             | DVARS Dip Associated: No   | Cross-Subject Variable: No                      |  |
| Single Subject: Yes                                                            | % Variance Explained: 0.53 | Globality Index: 1.07                           |  |
| Task Component: No                                                             | Taskr Component: No        | Sleep Noted: No                                 |  |
| Rationale: Single subject component with high correlation to global timecourse |                            |                                                 |  |



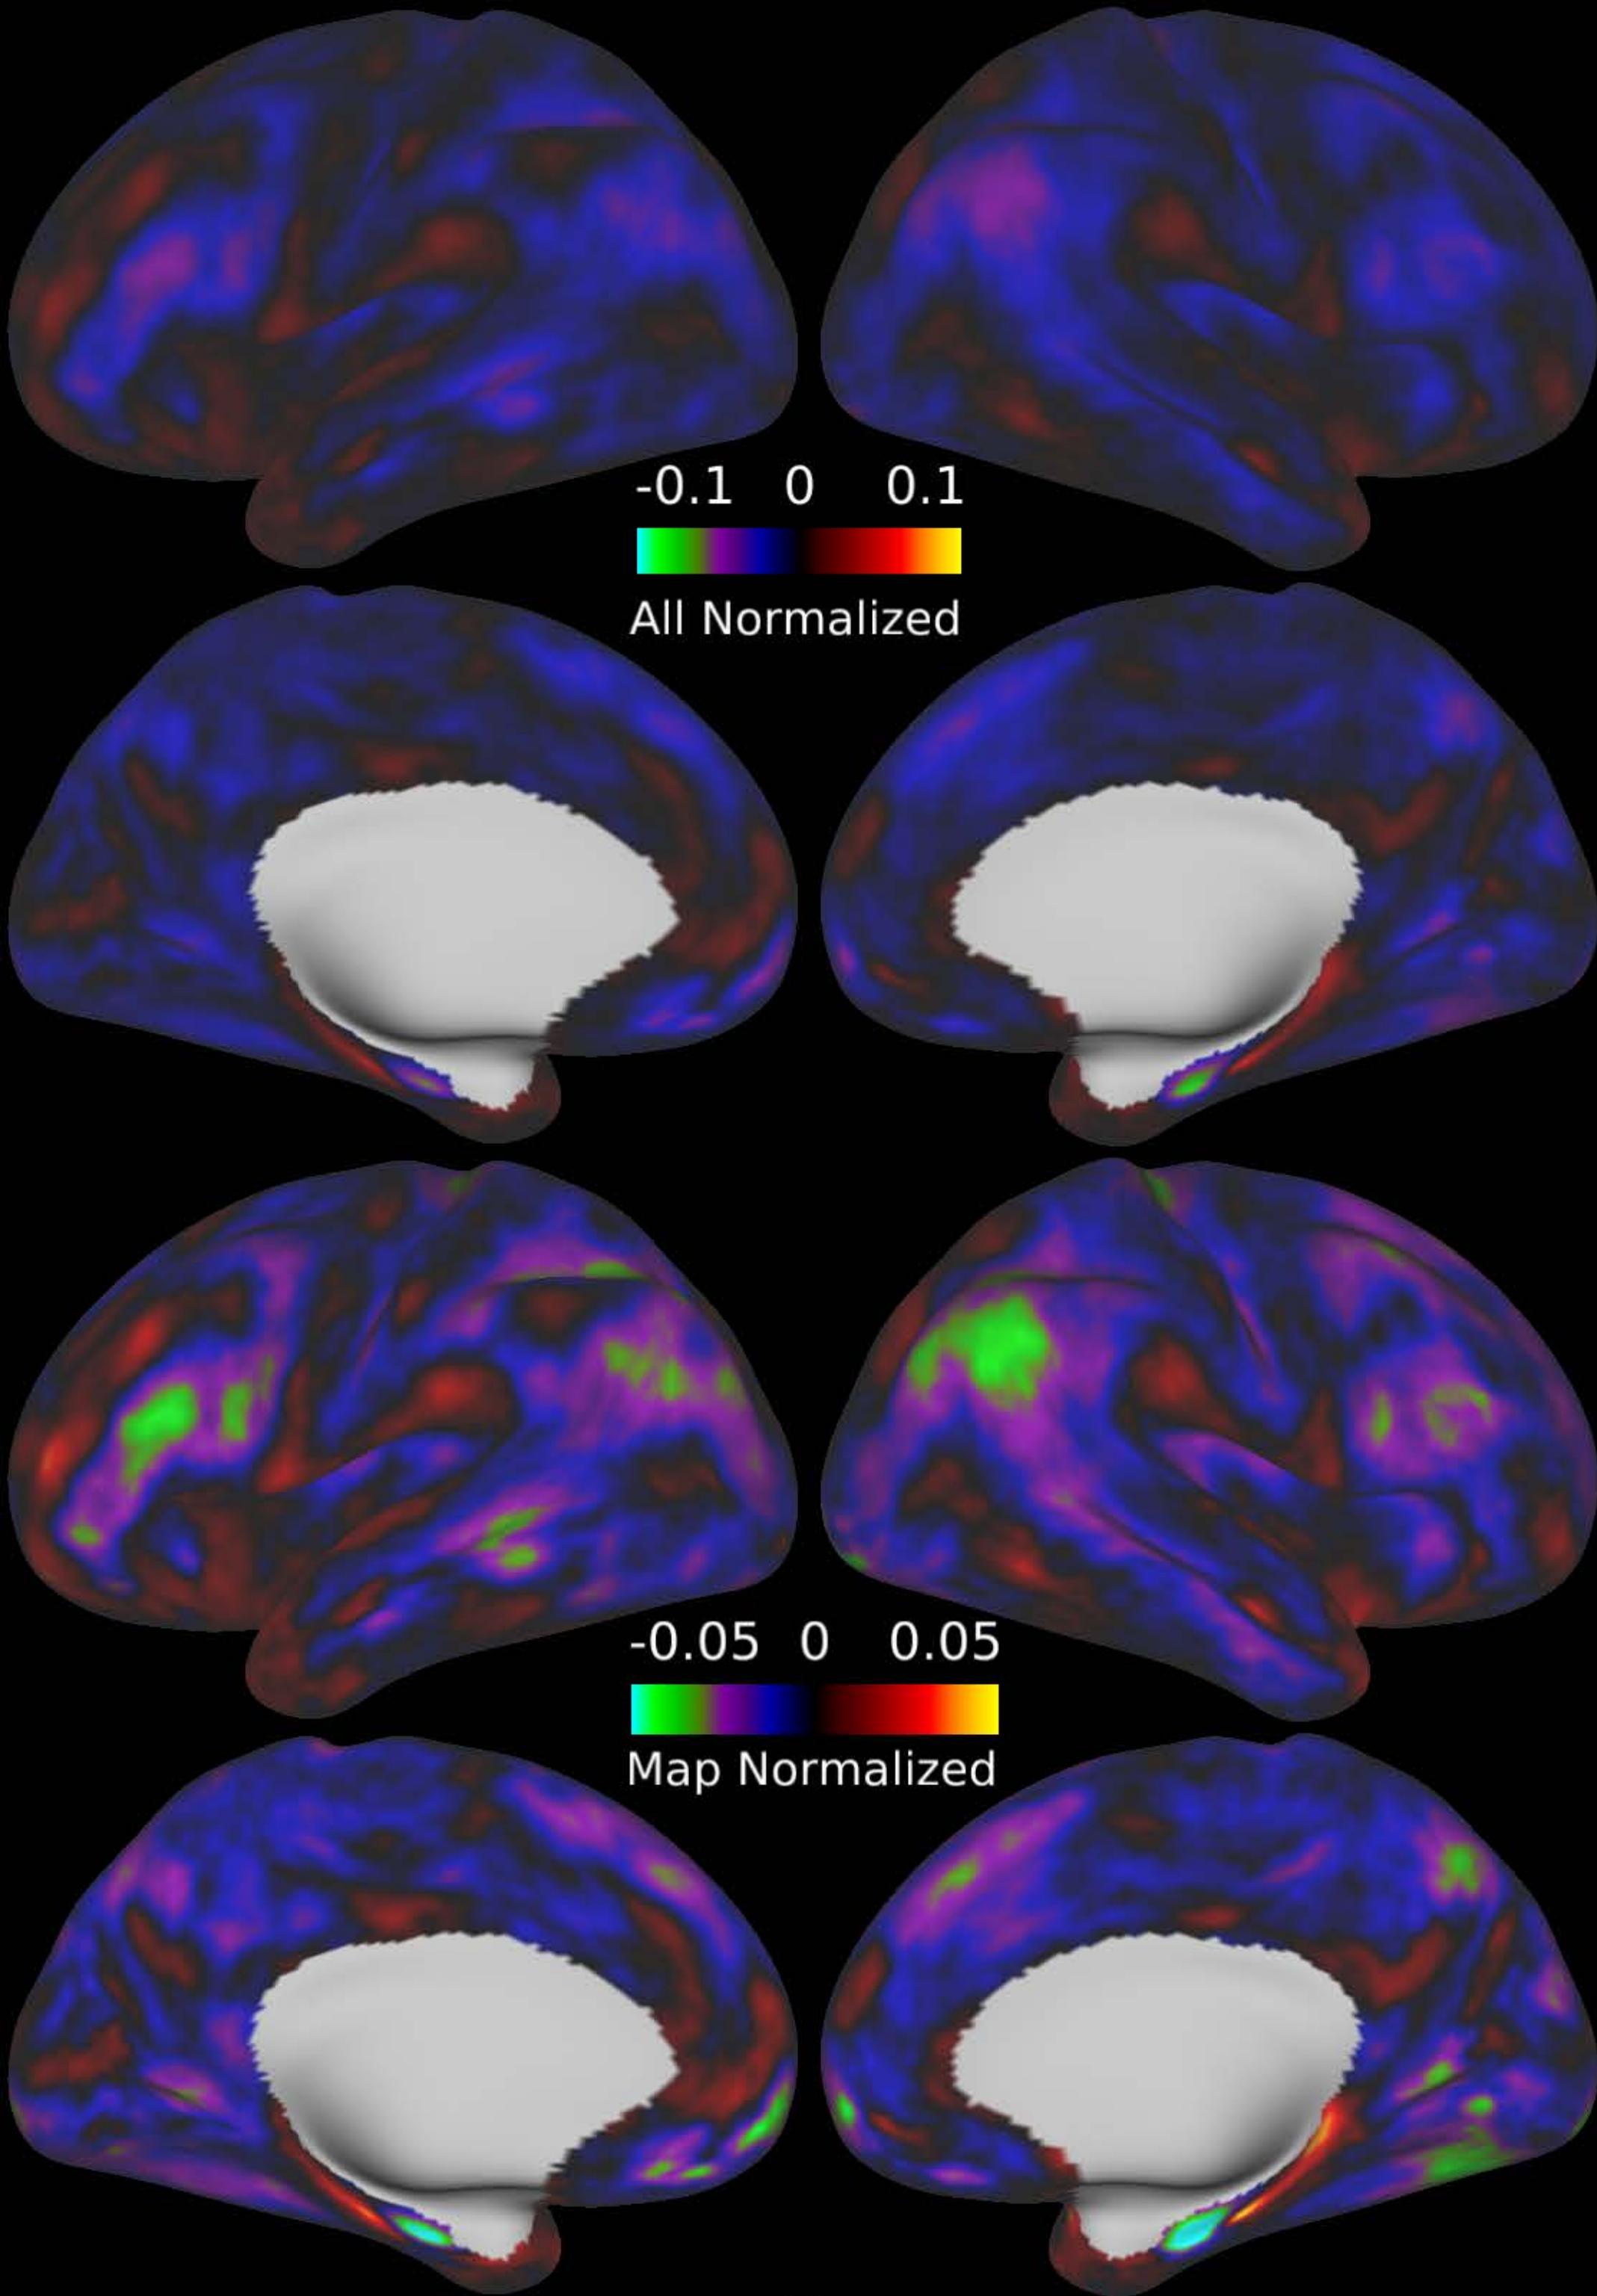

Hertz

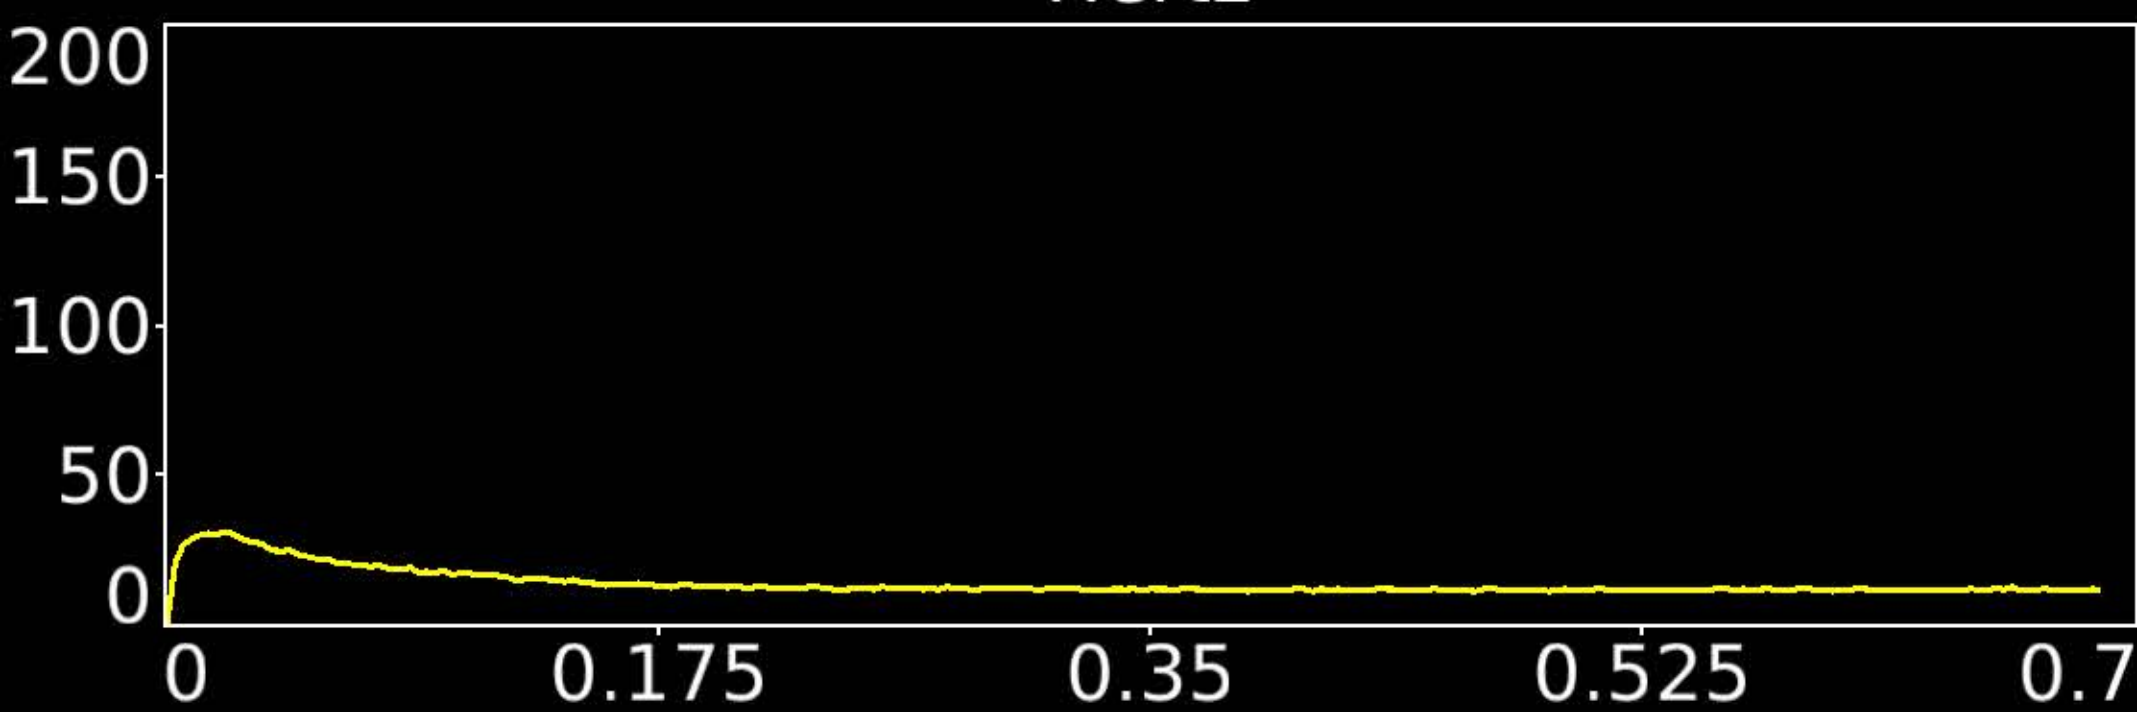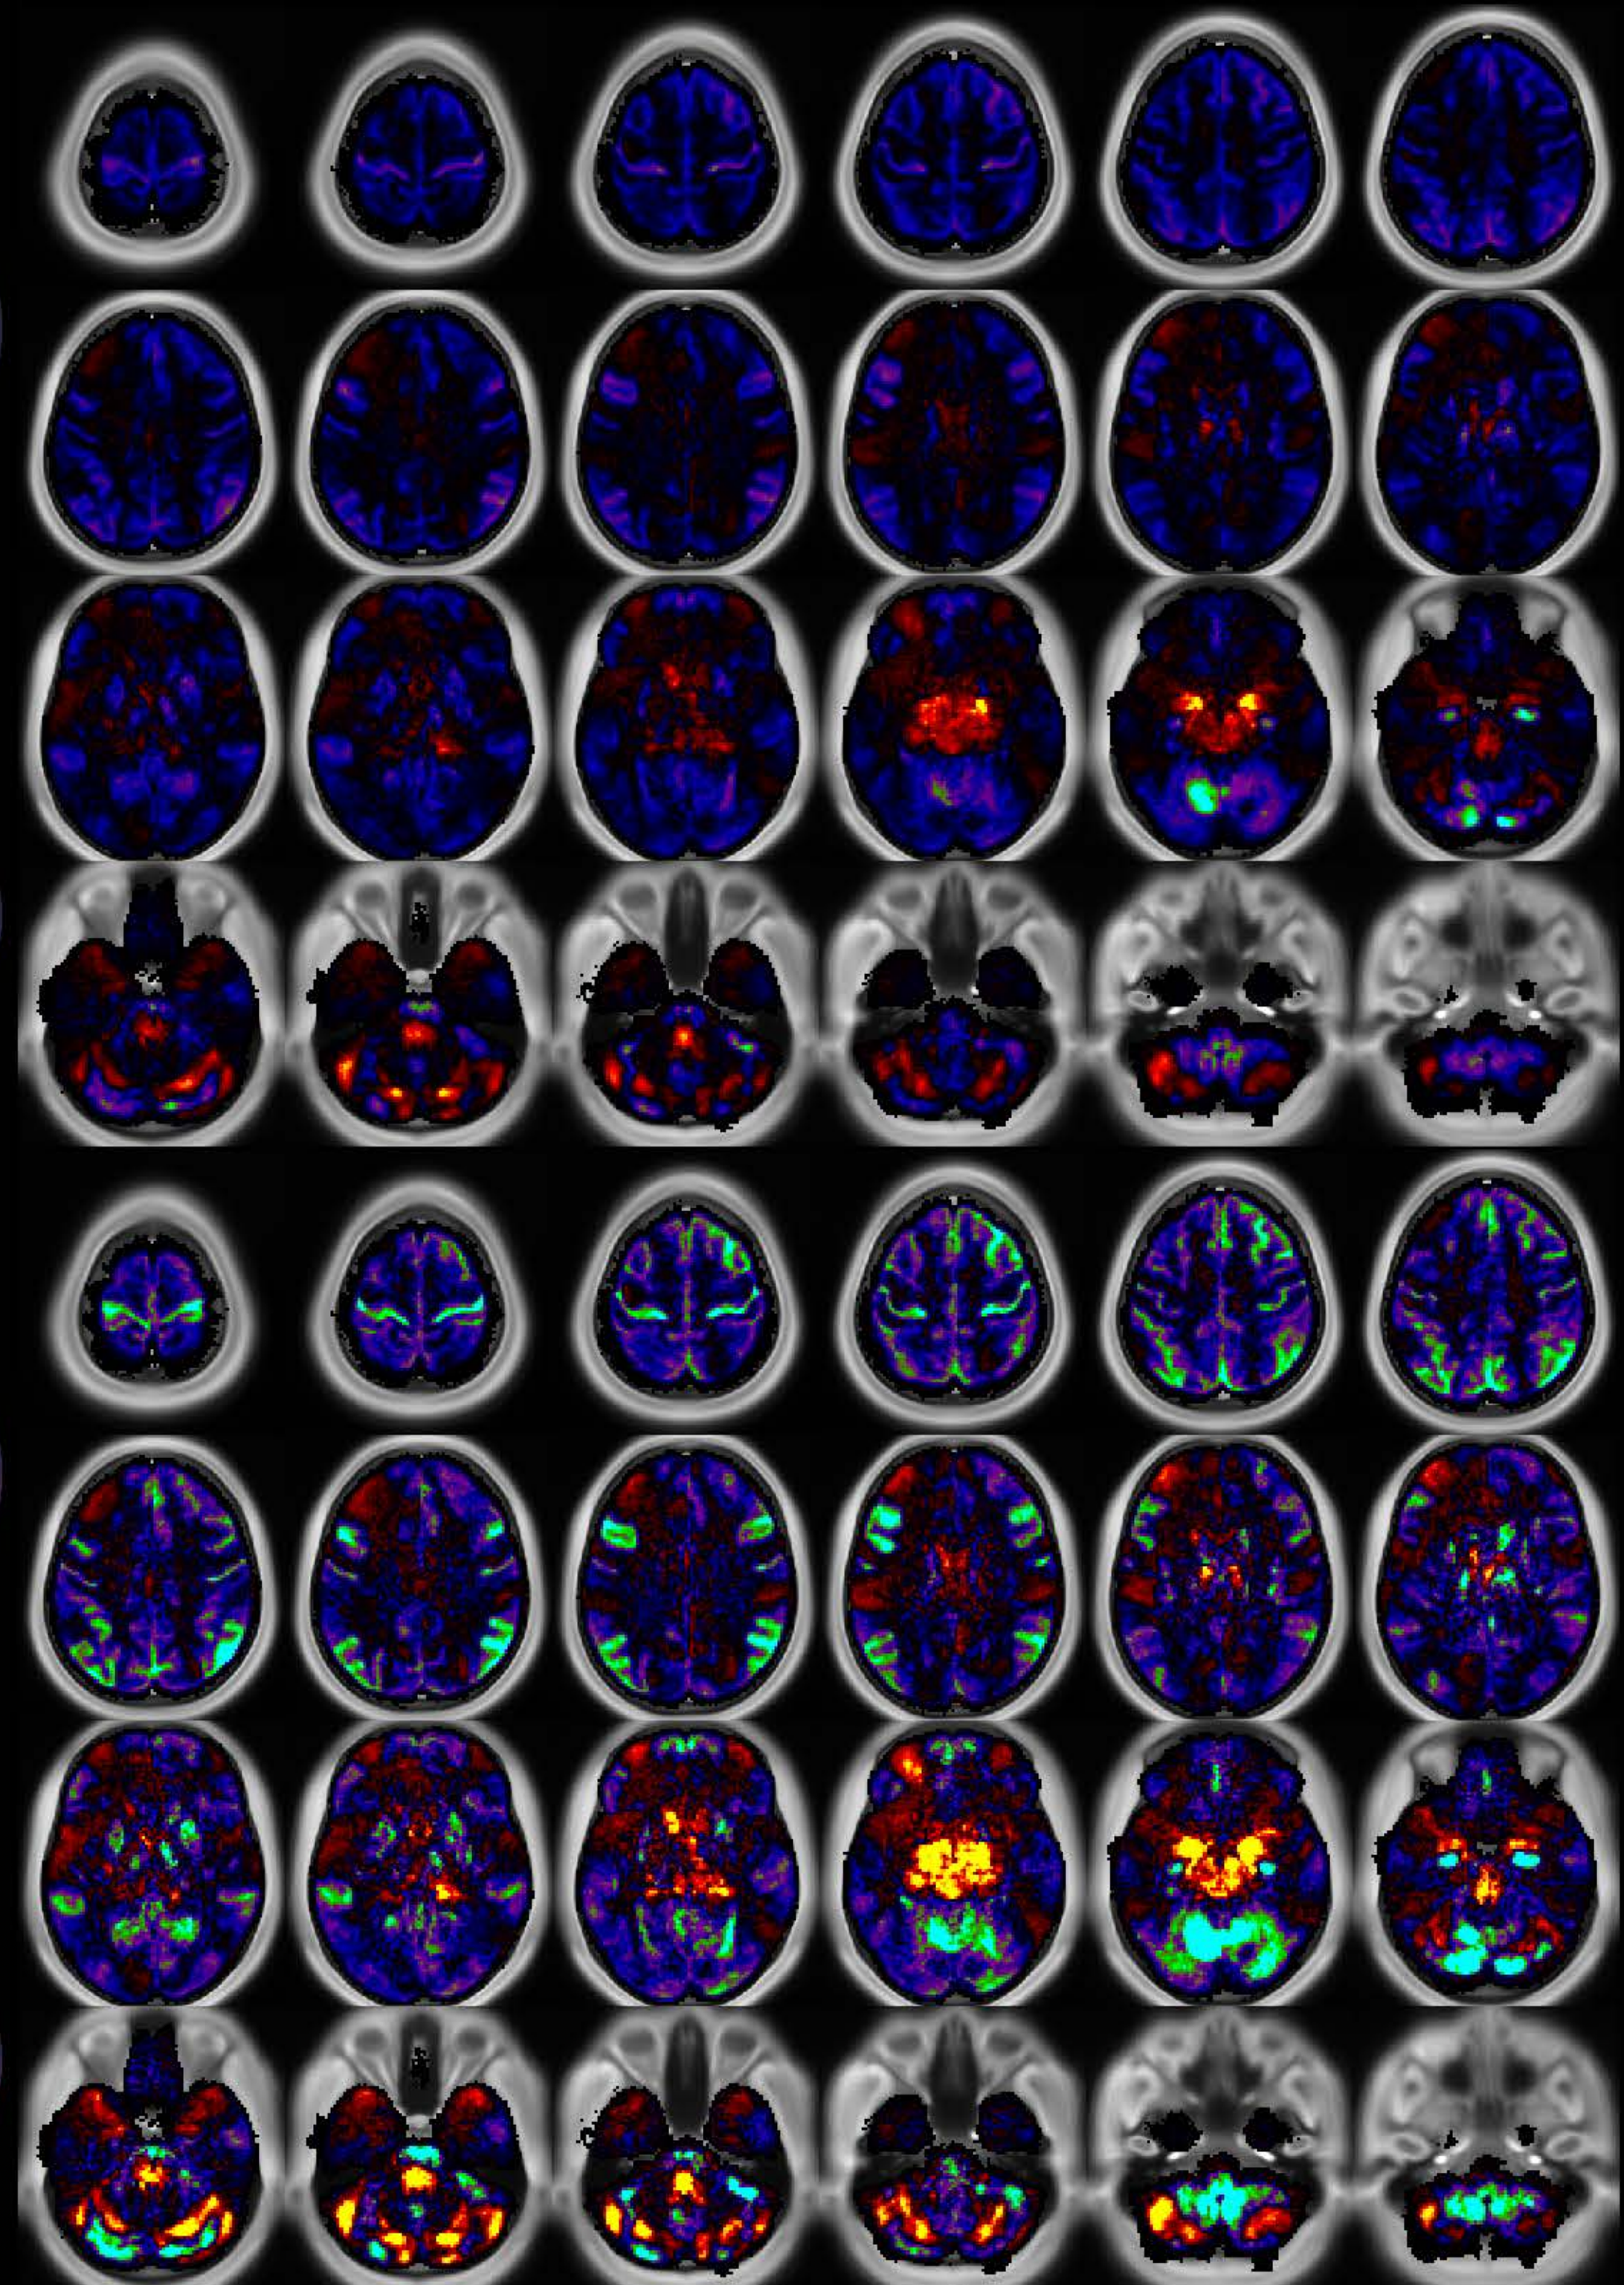

Seconds

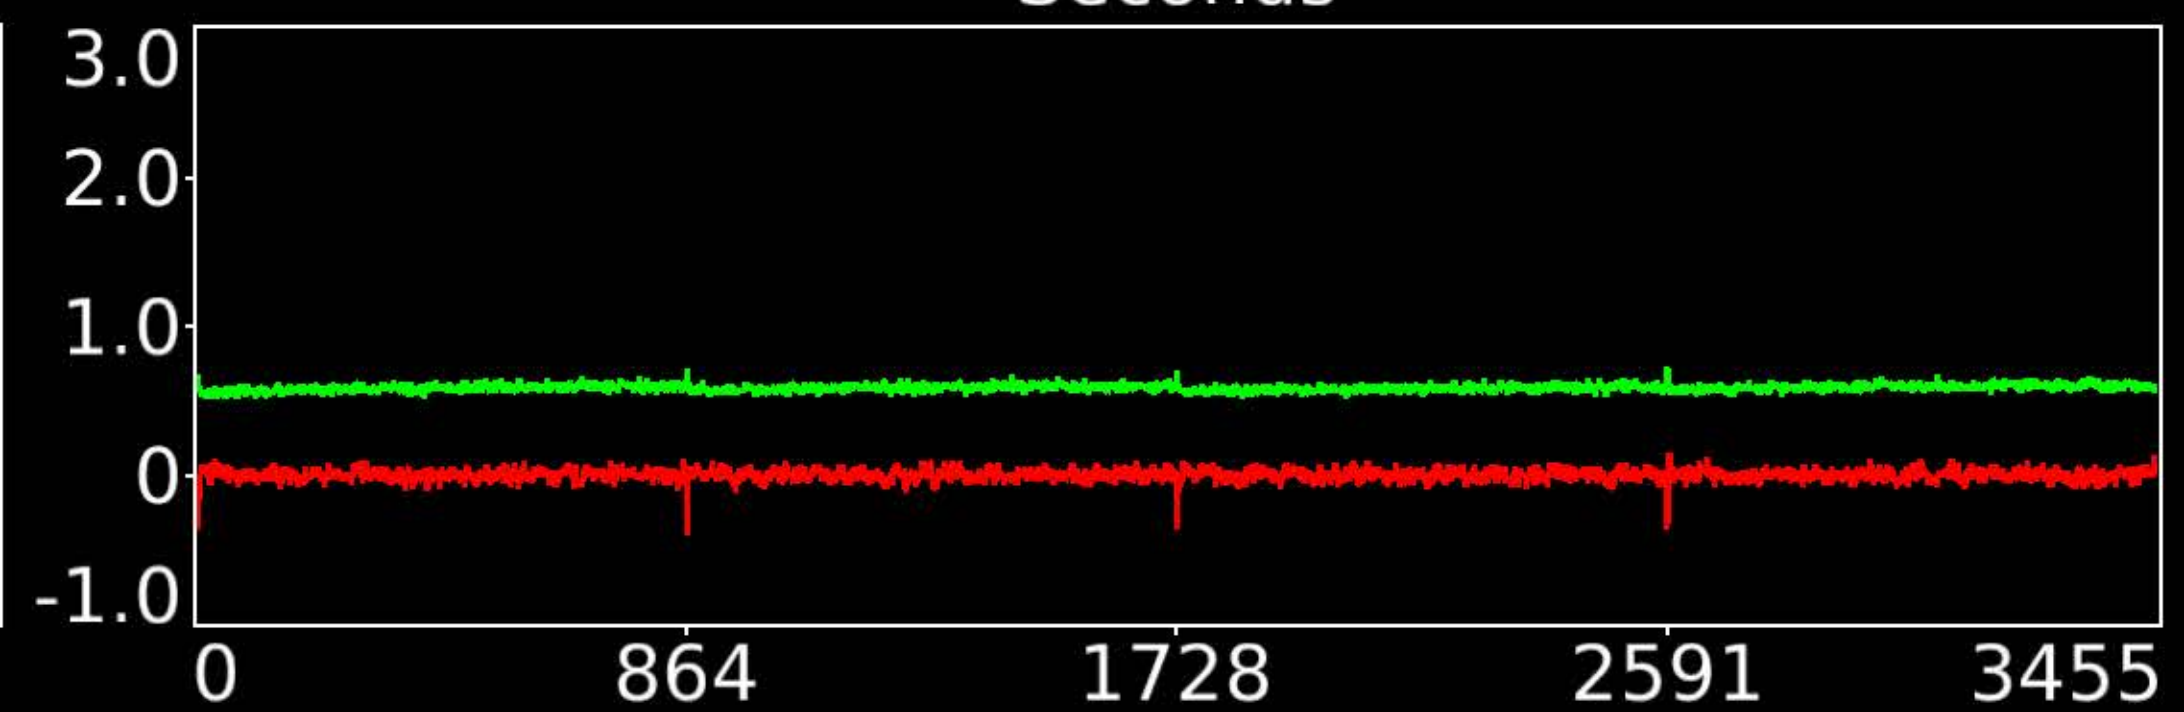

|                                                                                |                            |                                                 |  |
|--------------------------------------------------------------------------------|----------------------------|-------------------------------------------------|--|
| Number & Class: 67 Noise                                                       |                            | Name: Single Subject Global Physiological Noise |  |
| RVT Correlated: No                                                             | DVARS Dip Associated: No   | Cross-Subject Variable: No                      |  |
| Single Subject: Yes                                                            | % Variance Explained: 0.52 | Globality Index: 1.3                            |  |
| Task Component: No                                                             | Taskr Component: No        | Sleep Noted: No                                 |  |
| Rationale: Single subject component with high correlation to global timecourse |                            |                                                 |  |



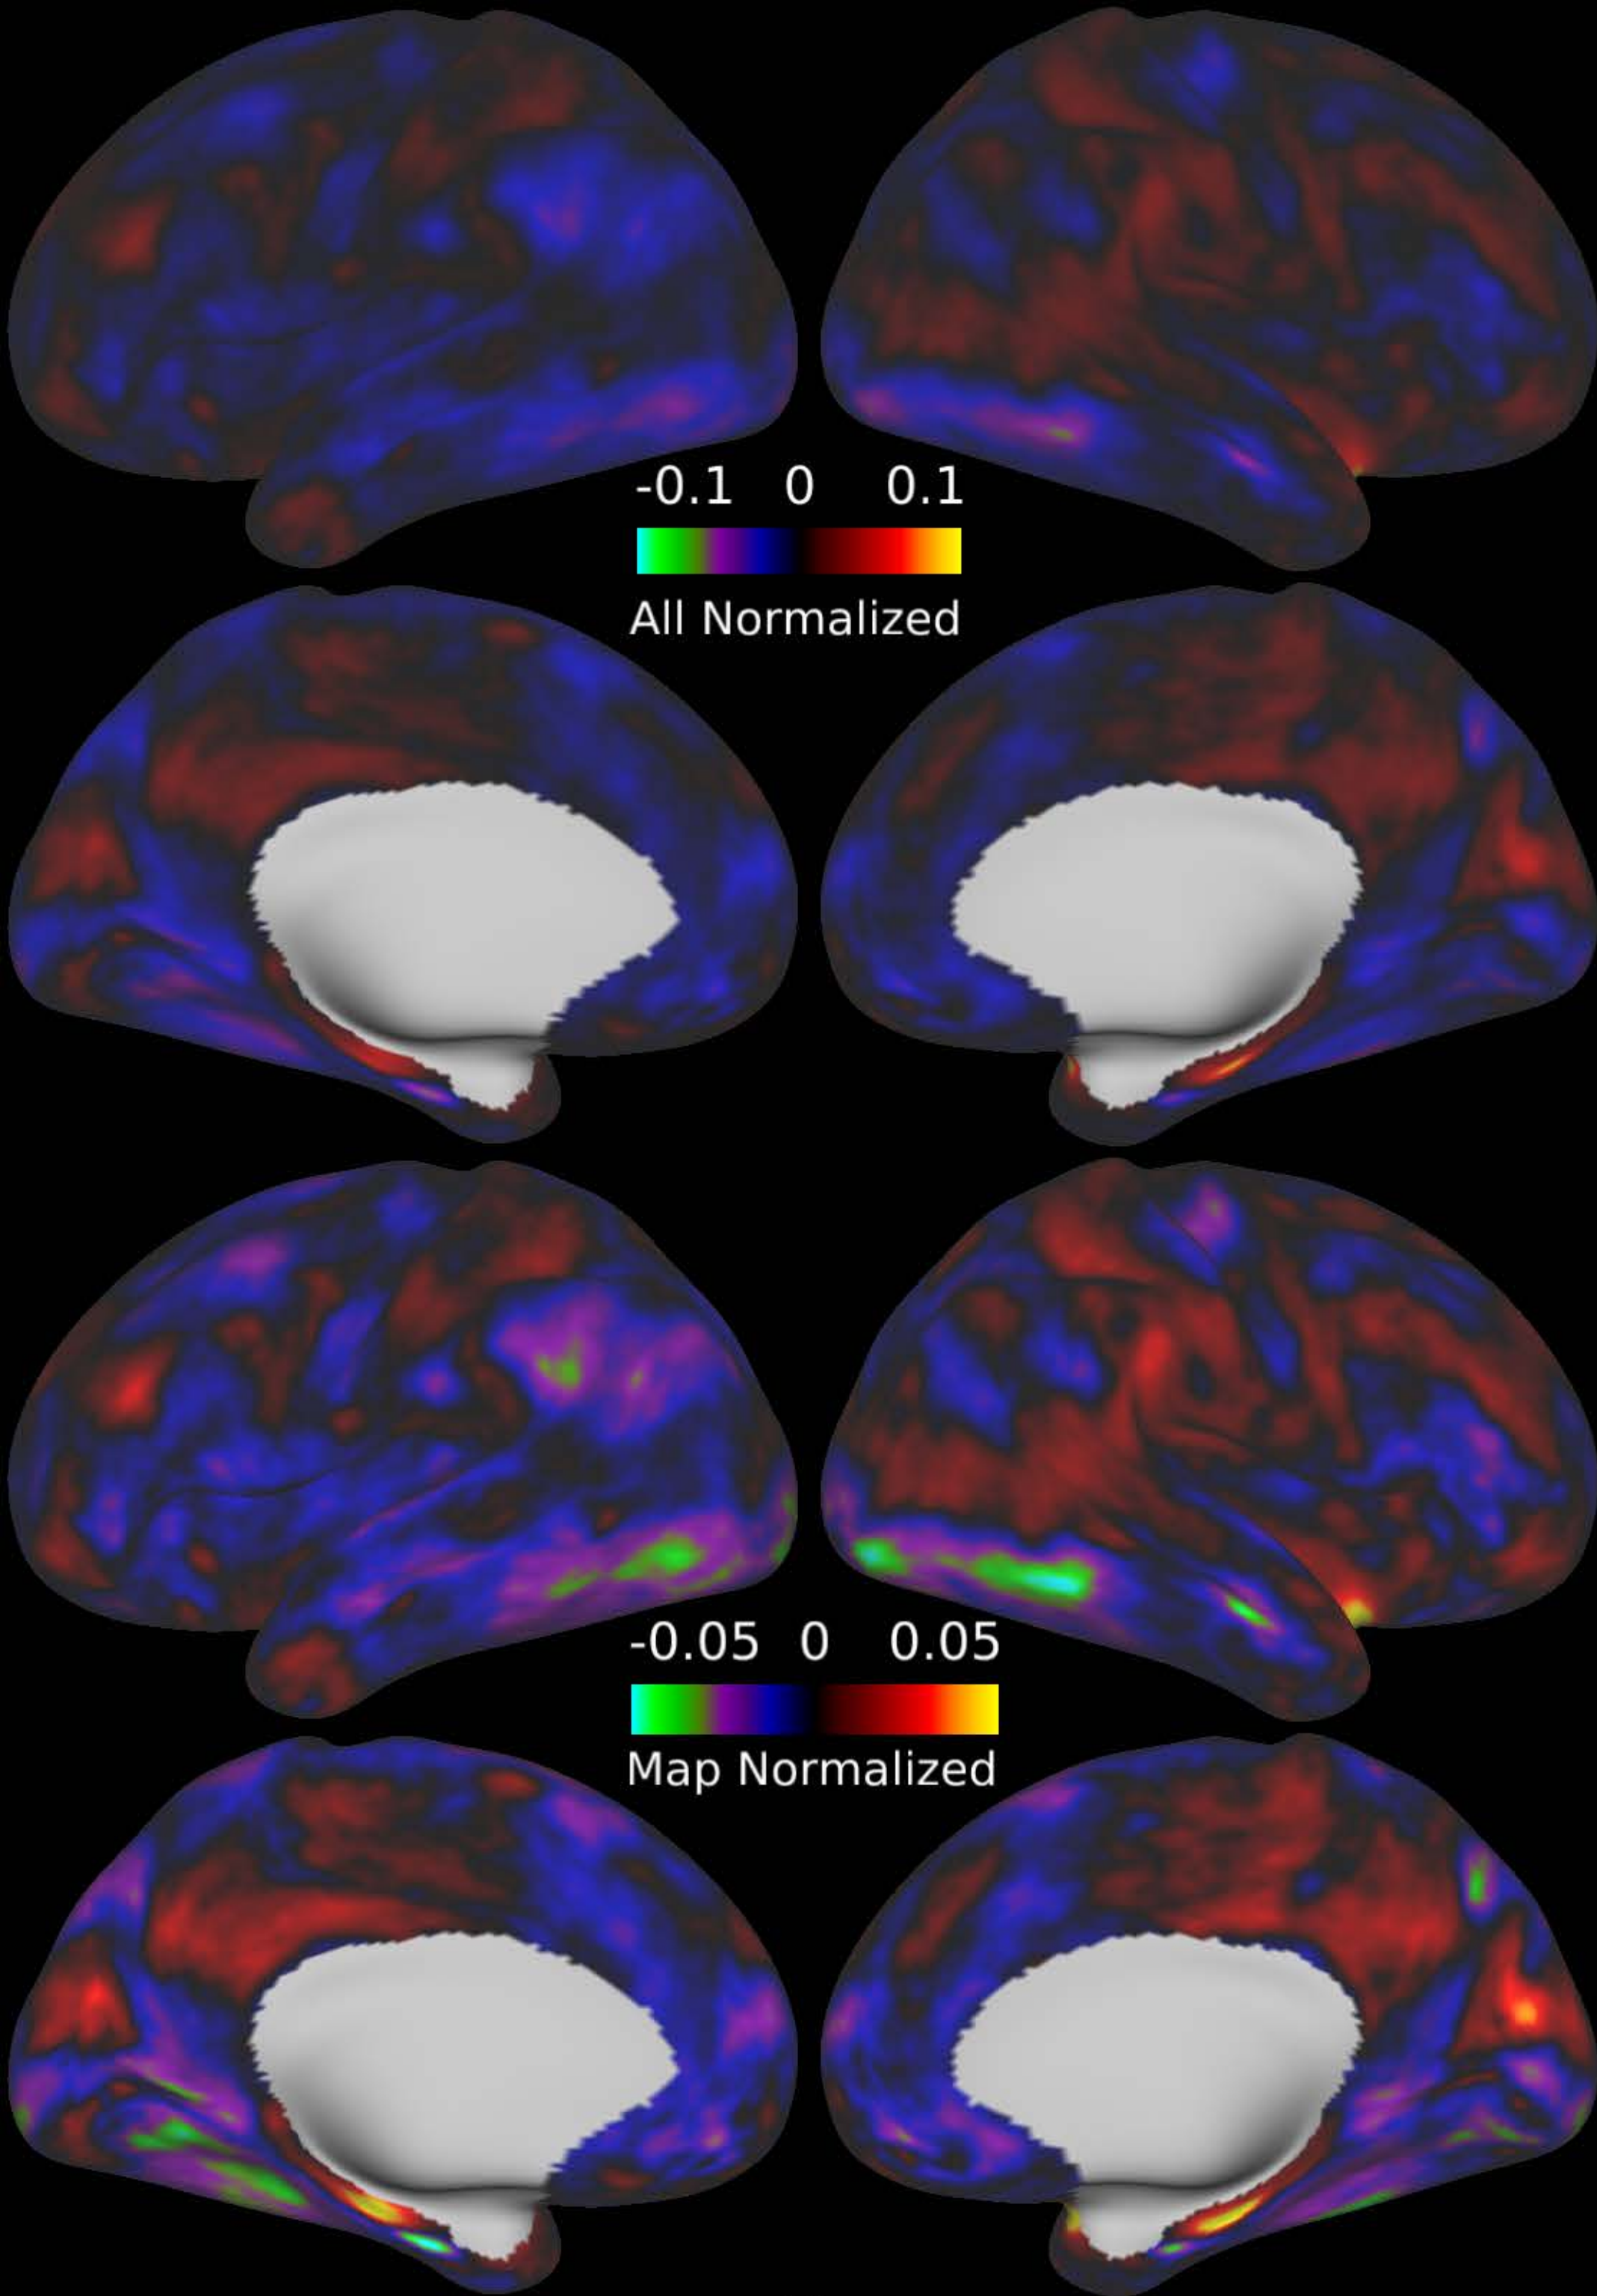

Hertz

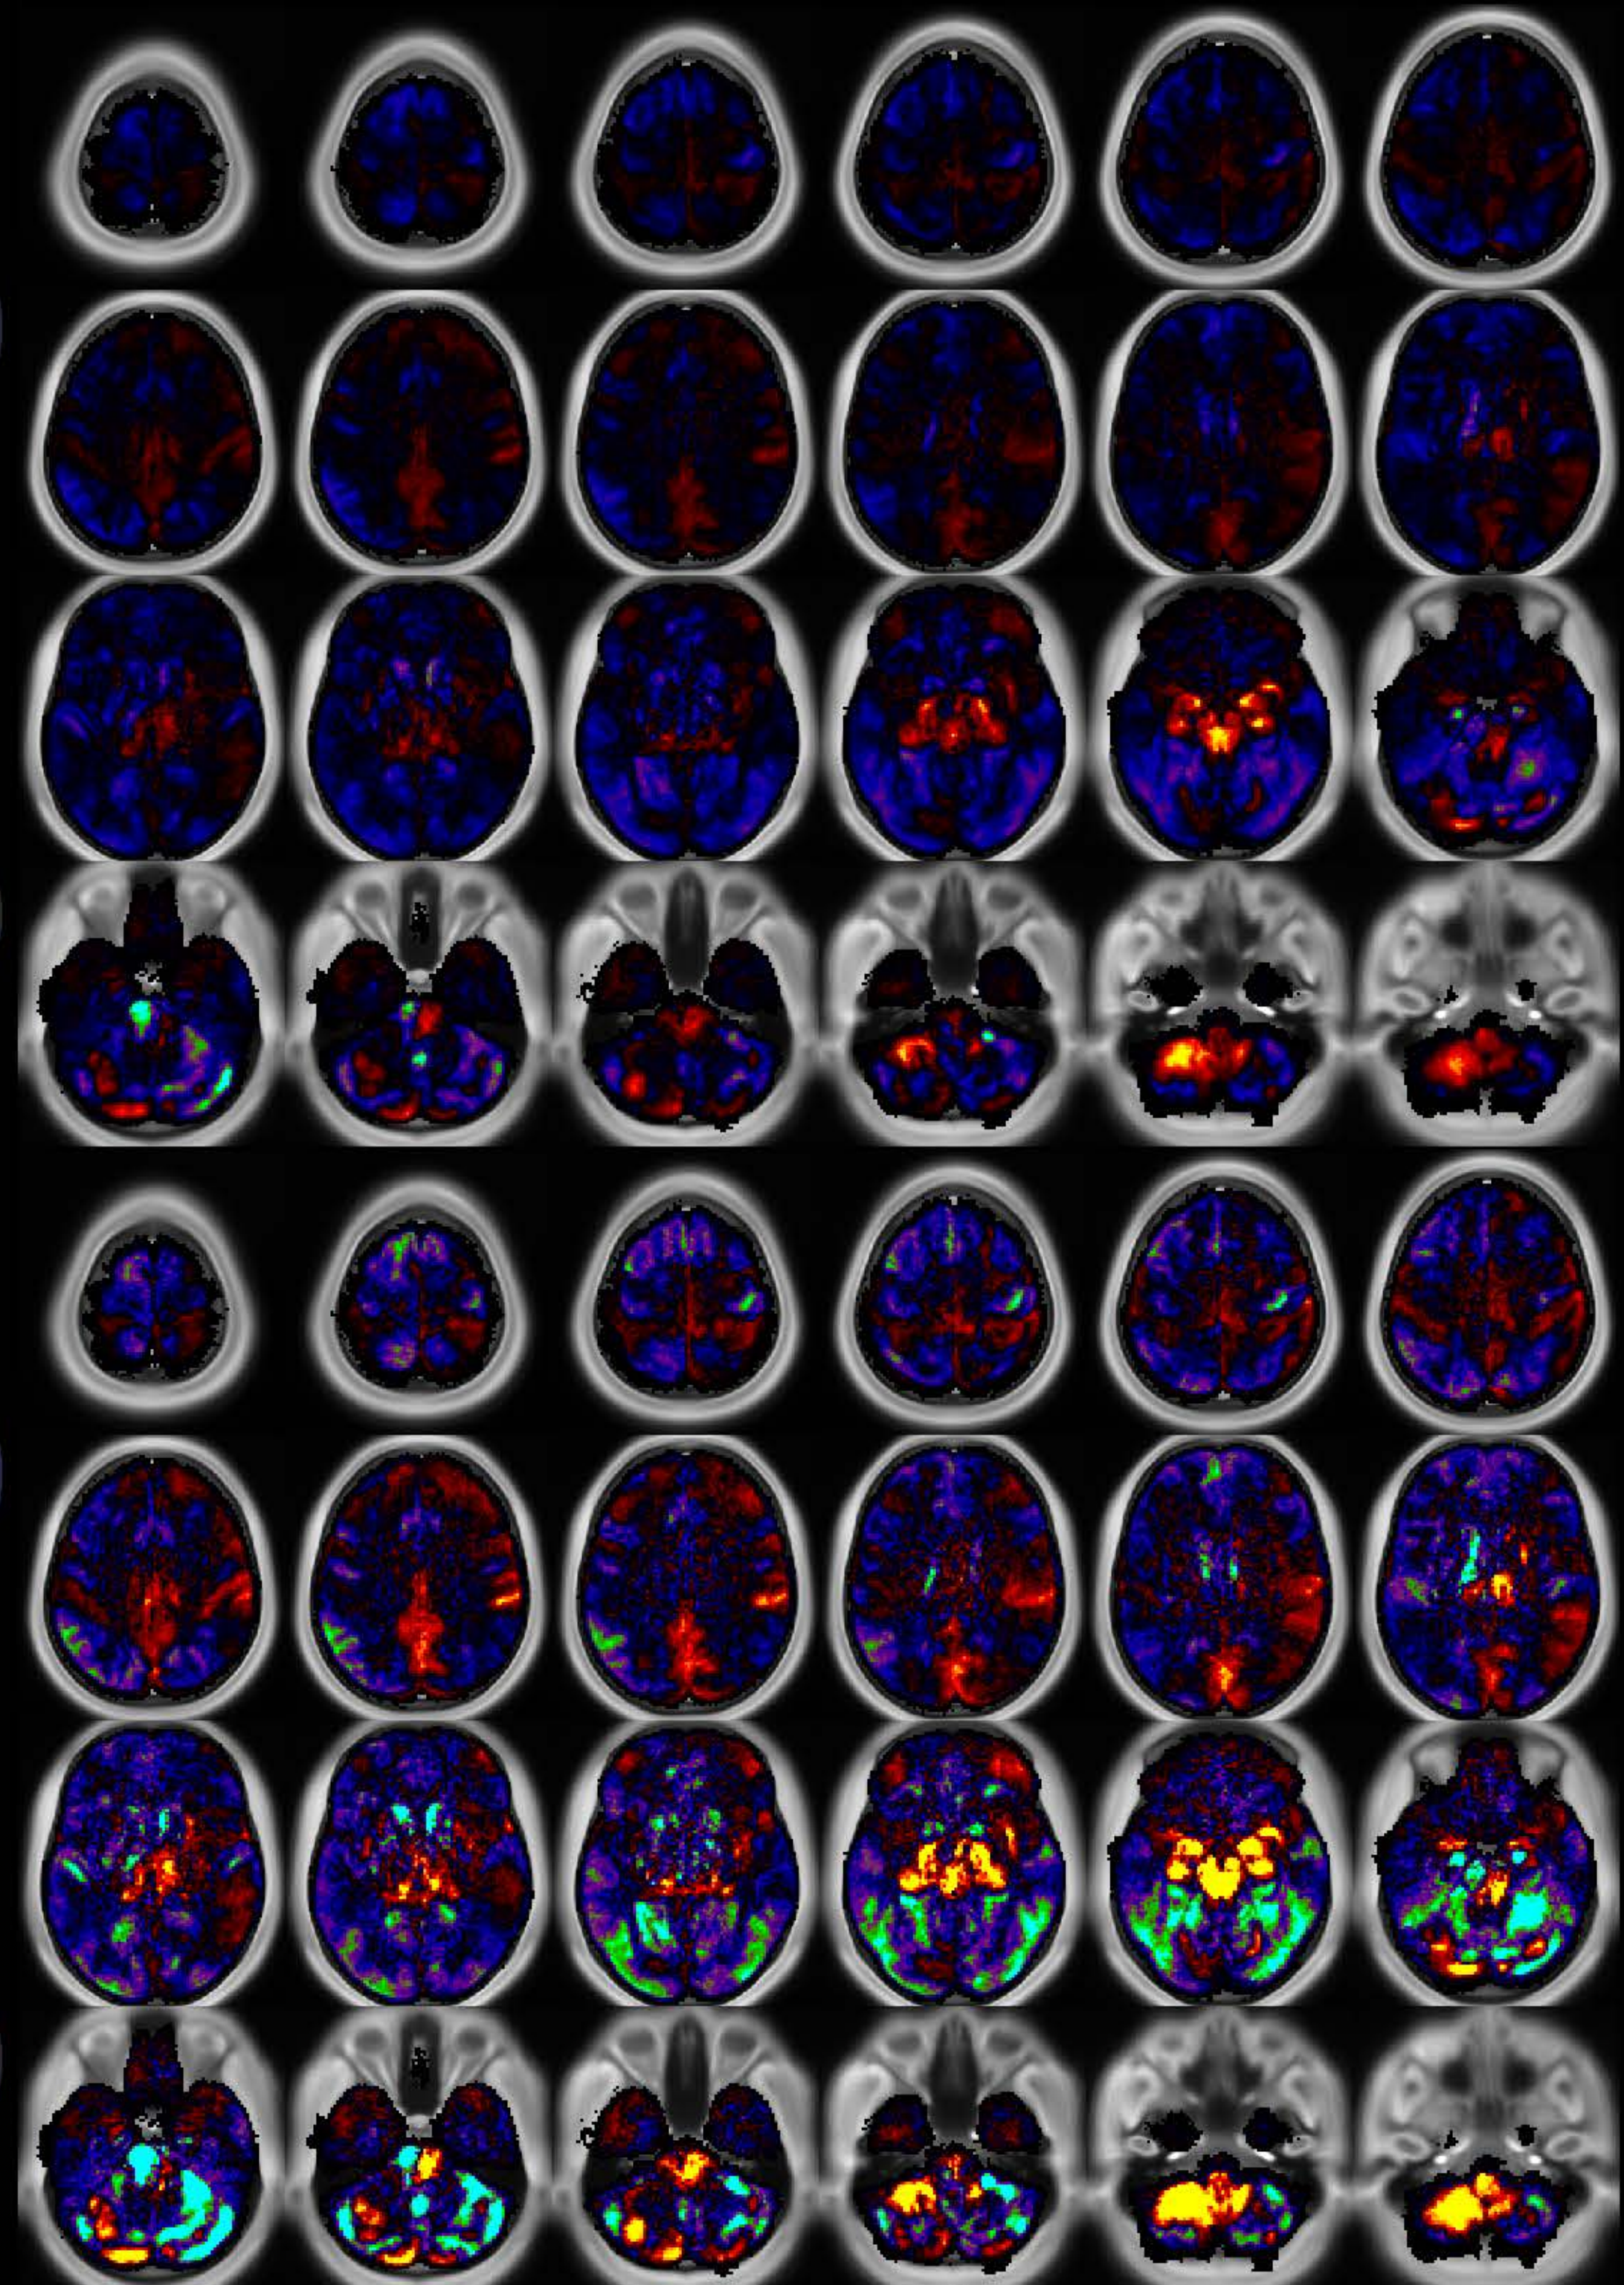

Seconds

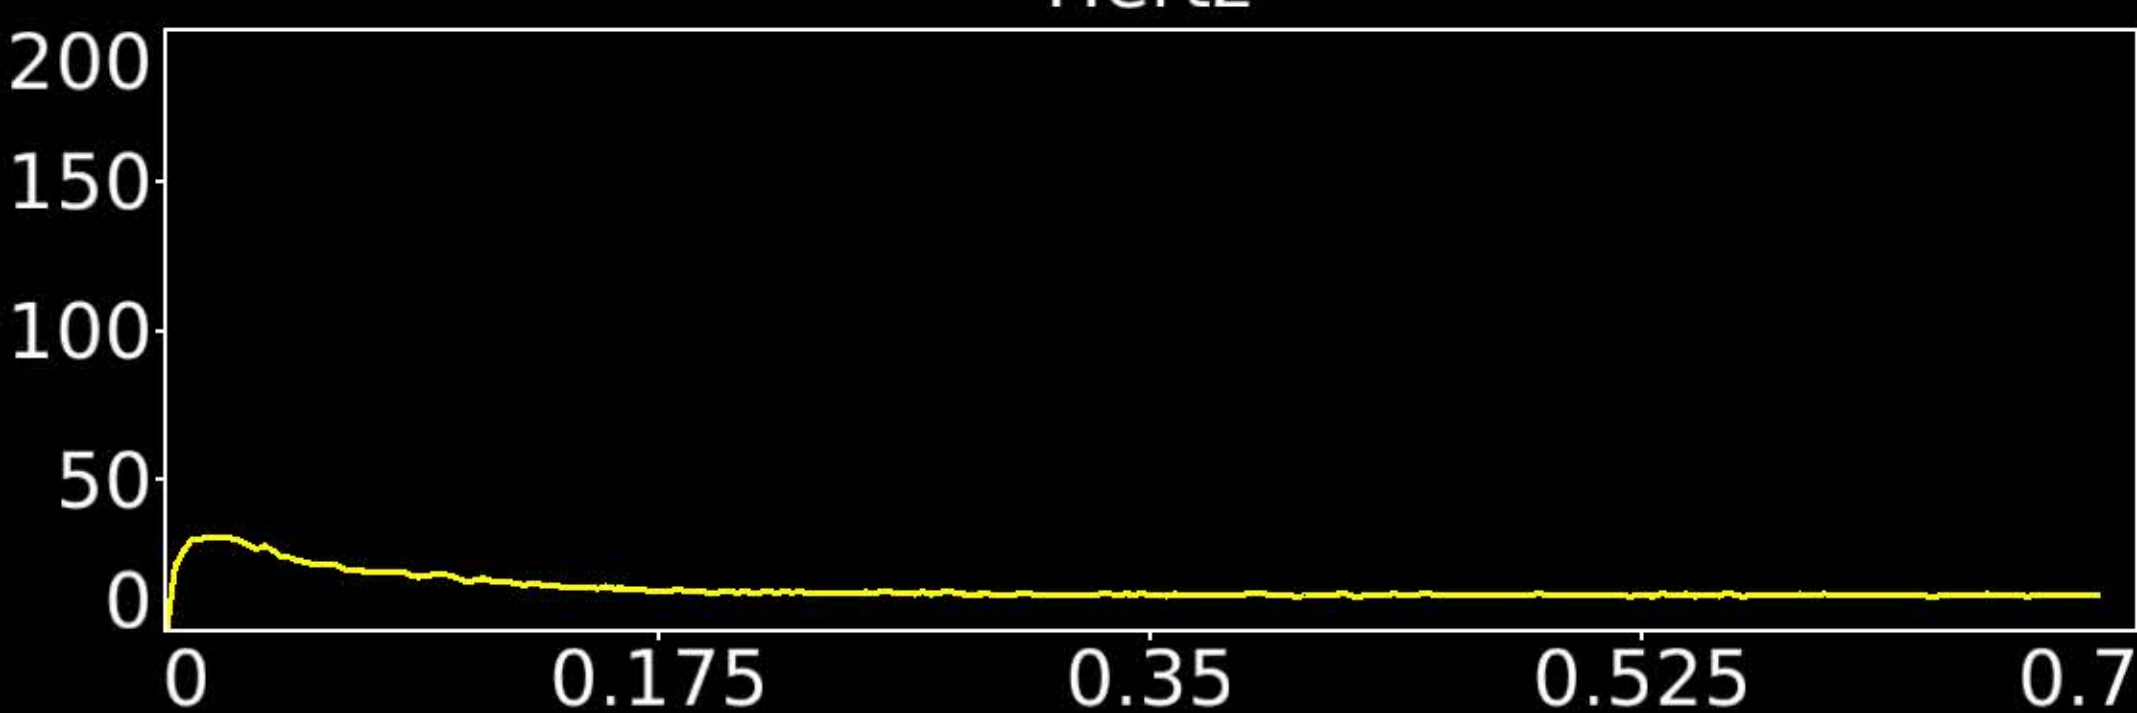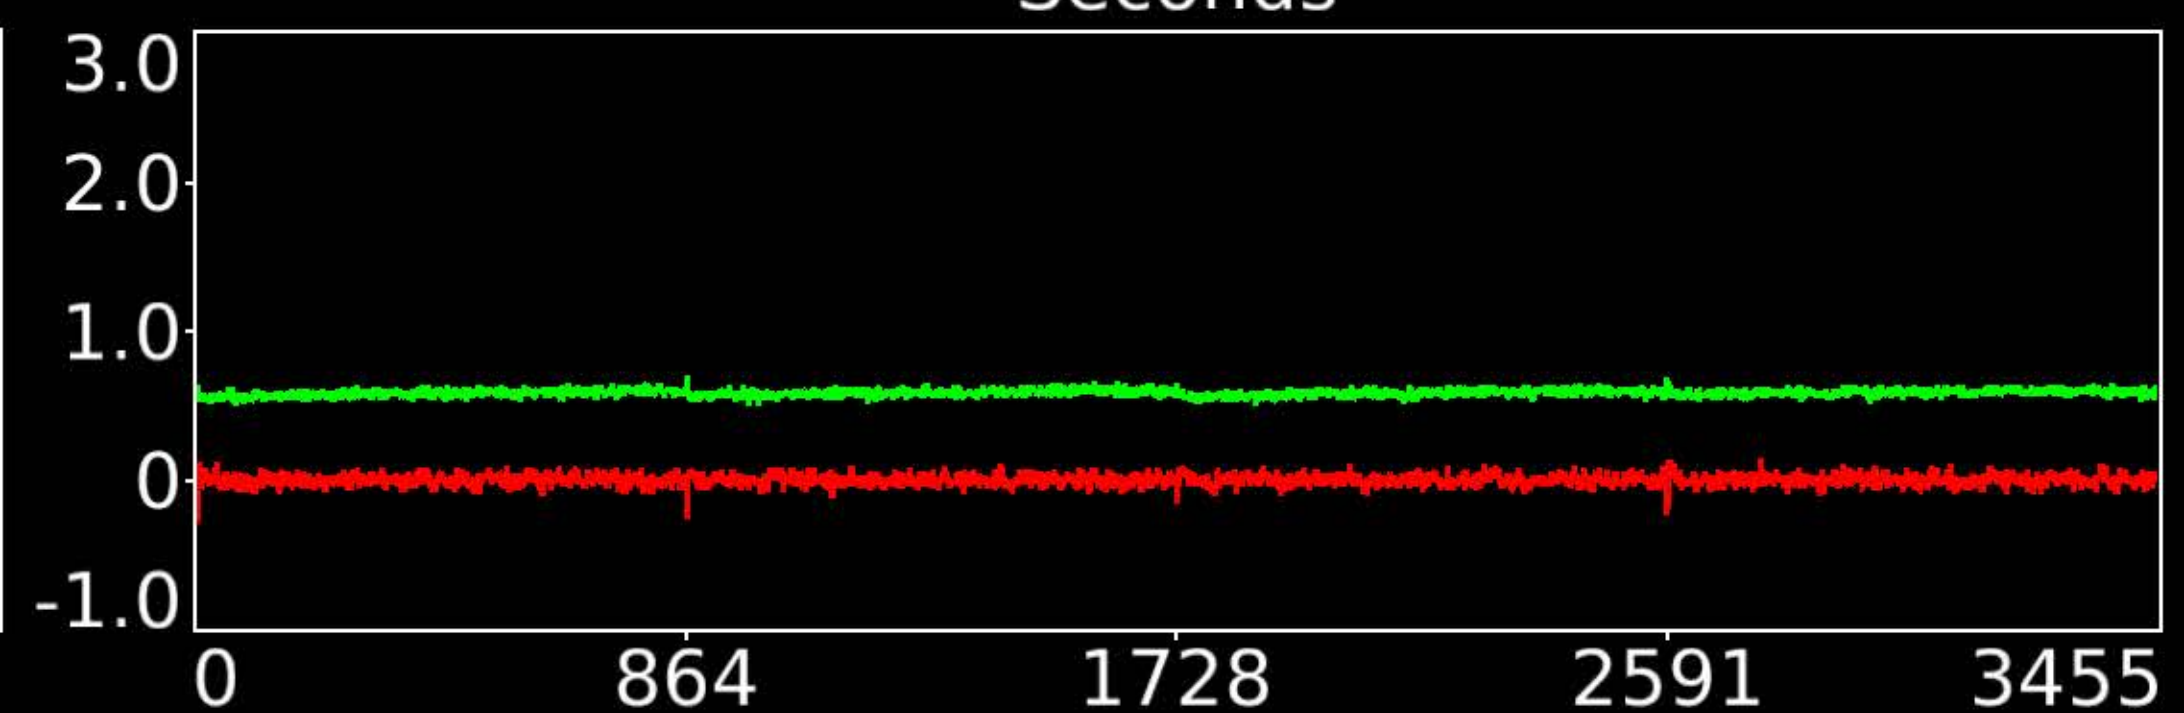

|                                                                                |                            |                                                 |  |
|--------------------------------------------------------------------------------|----------------------------|-------------------------------------------------|--|
| Number & Class: 68 Noise                                                       |                            | Name: Single Subject Global Physiological Noise |  |
| RVT Correlated: No                                                             | DVARS Dip Associated: No   | Cross-Subject Variable: No                      |  |
| Single Subject: Yes                                                            | % Variance Explained: 0.52 | Globality Index: 0.62                           |  |
| Task Component: No                                                             | Taskr Component: No        | Sleep Noted: No                                 |  |
| Rationale: Single subject component with high correlation to global timecourse |                            |                                                 |  |



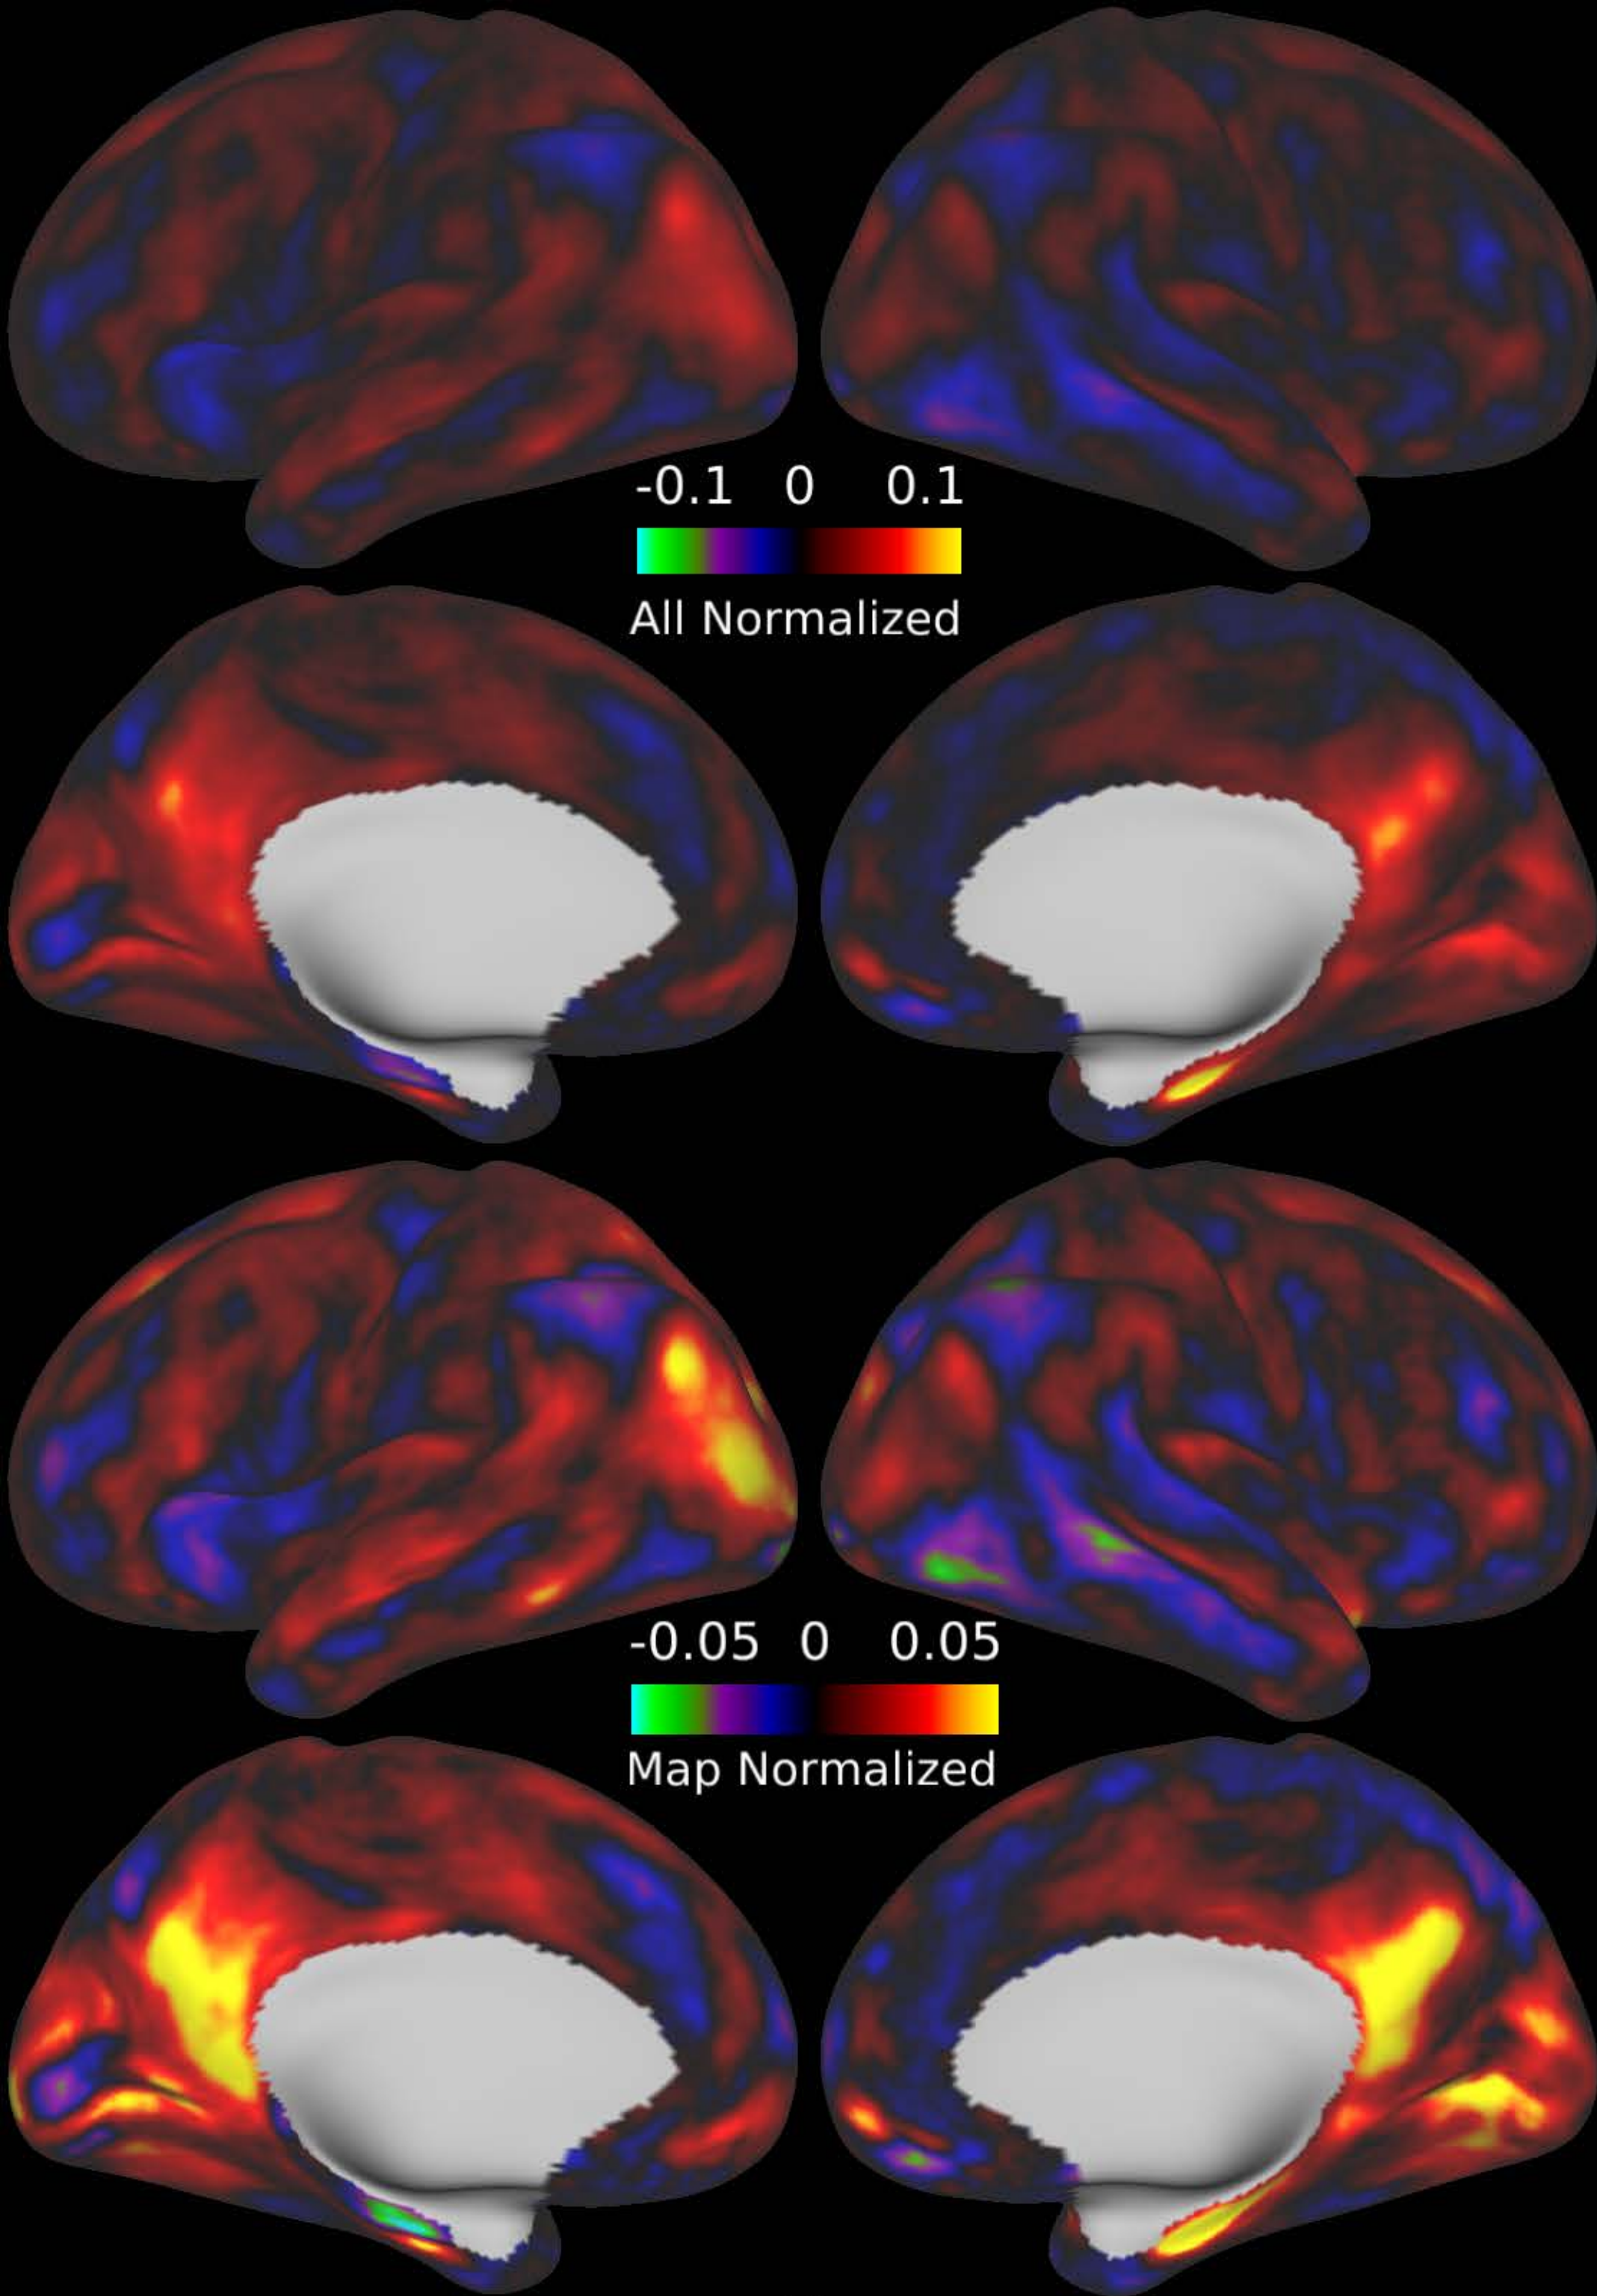

Hertz

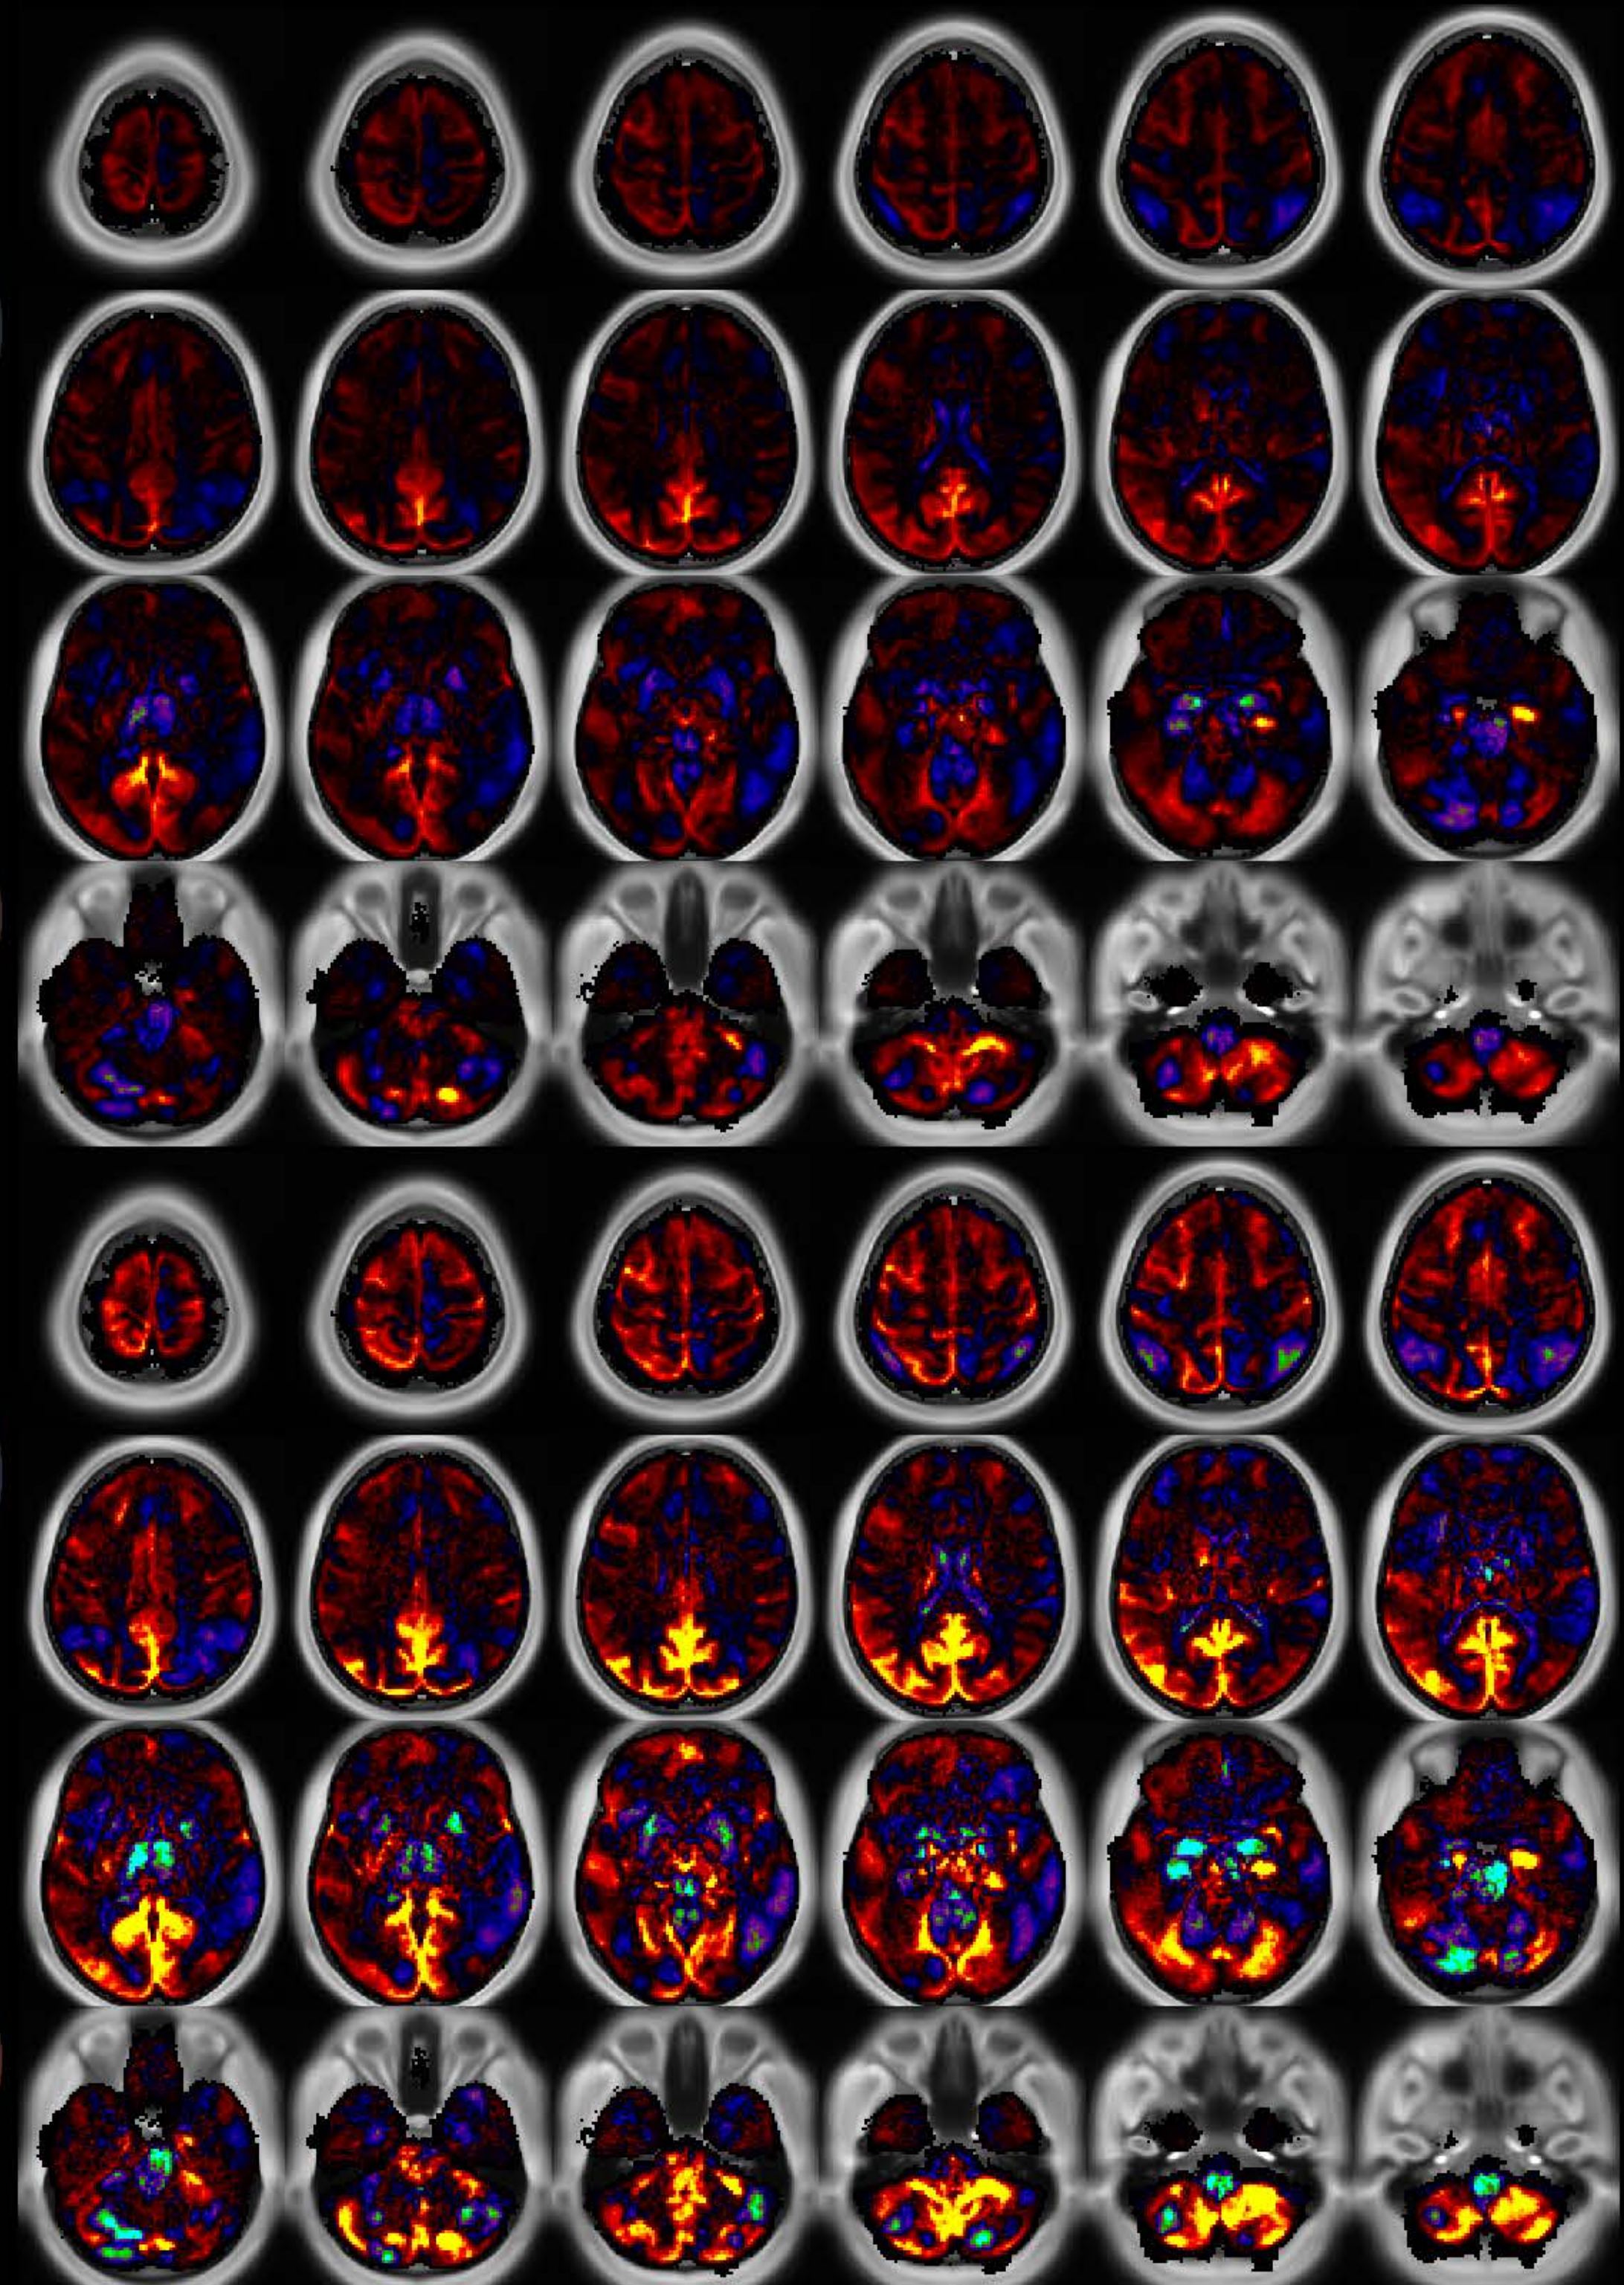

Seconds

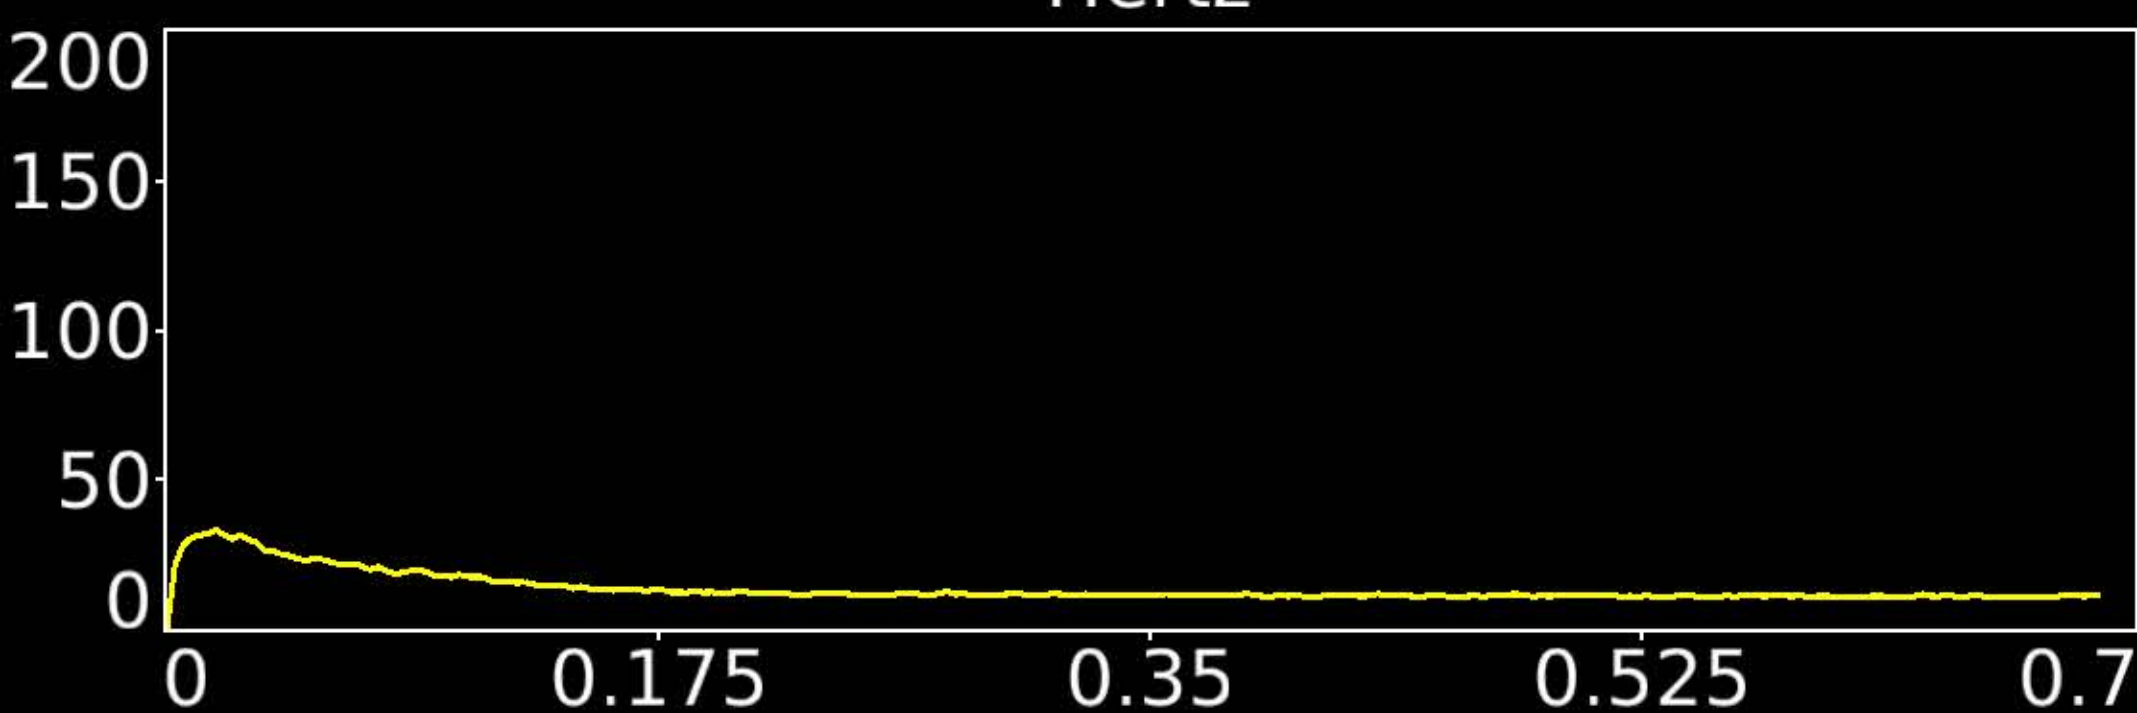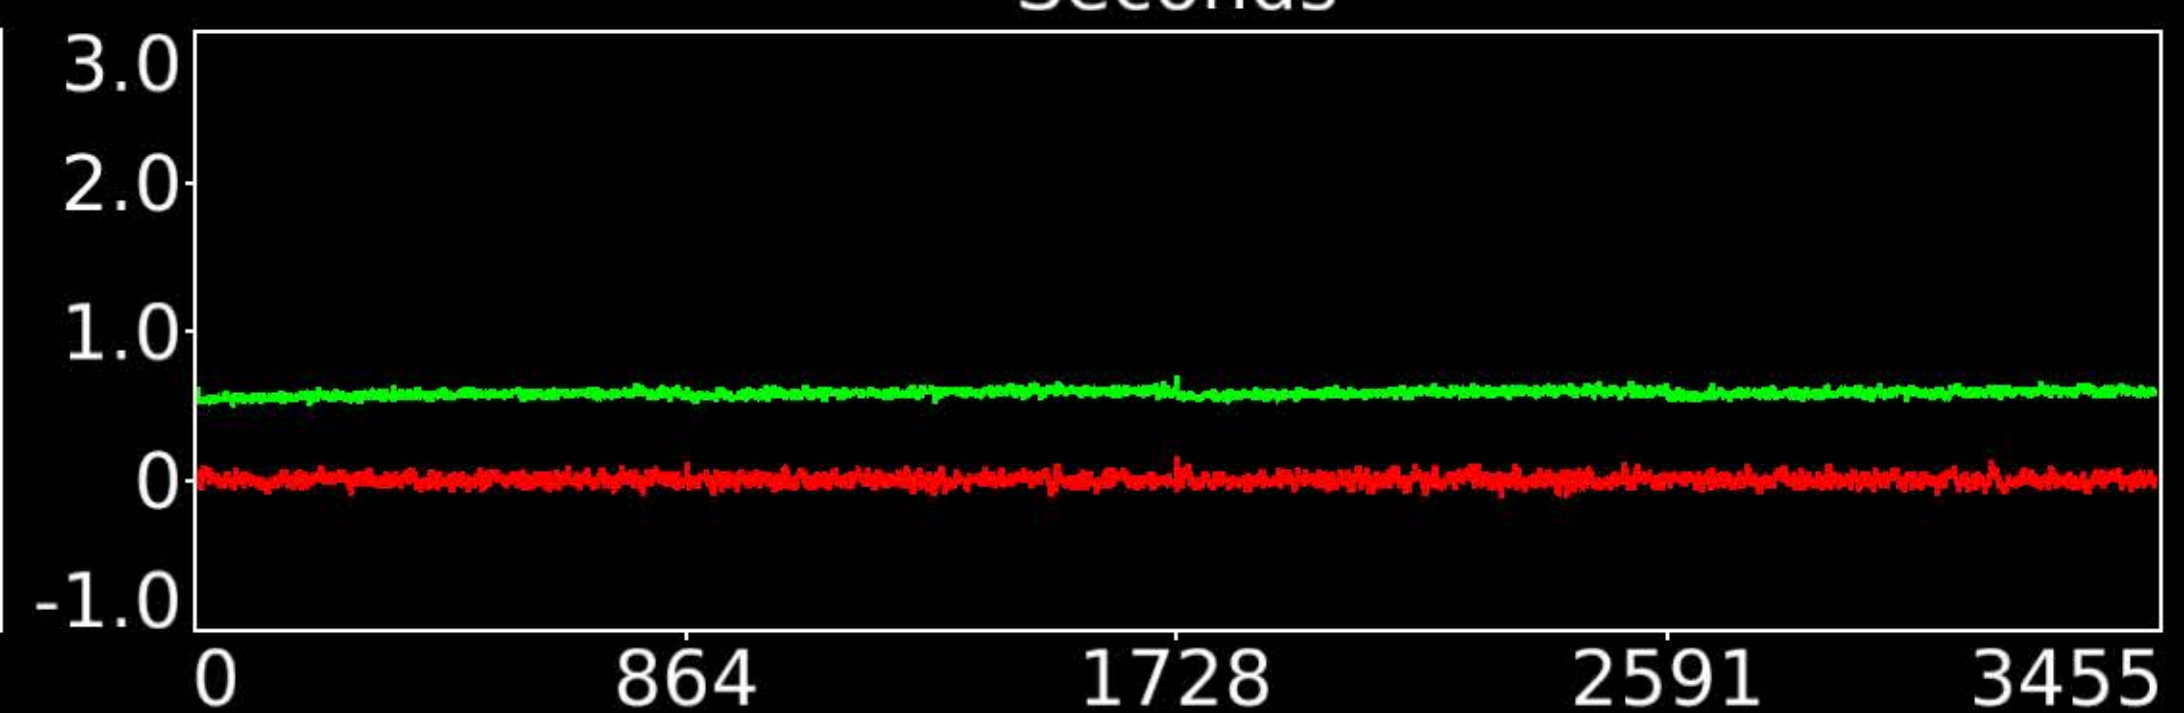

|                           |                            |                                                         |  |
|---------------------------|----------------------------|---------------------------------------------------------|--|
| Number & Class: 69 Signal |                            | Name: Highly Globally Correlated Single Subject: Sleep? |  |
| RVT Correlated: No        | DVARS Dip Associated: No   | Cross-Subject Variable: No                              |  |
| Single Subject: Yes       | % Variance Explained: 0.52 | Globality Index: 0.86                                   |  |
| Task Component: No        | Taskr Component: No        | Sleep Noted: No                                         |  |

Rationale: Controversial: Single subject component with high correlation to global timecourse; looked more like RC1 than global noise components)



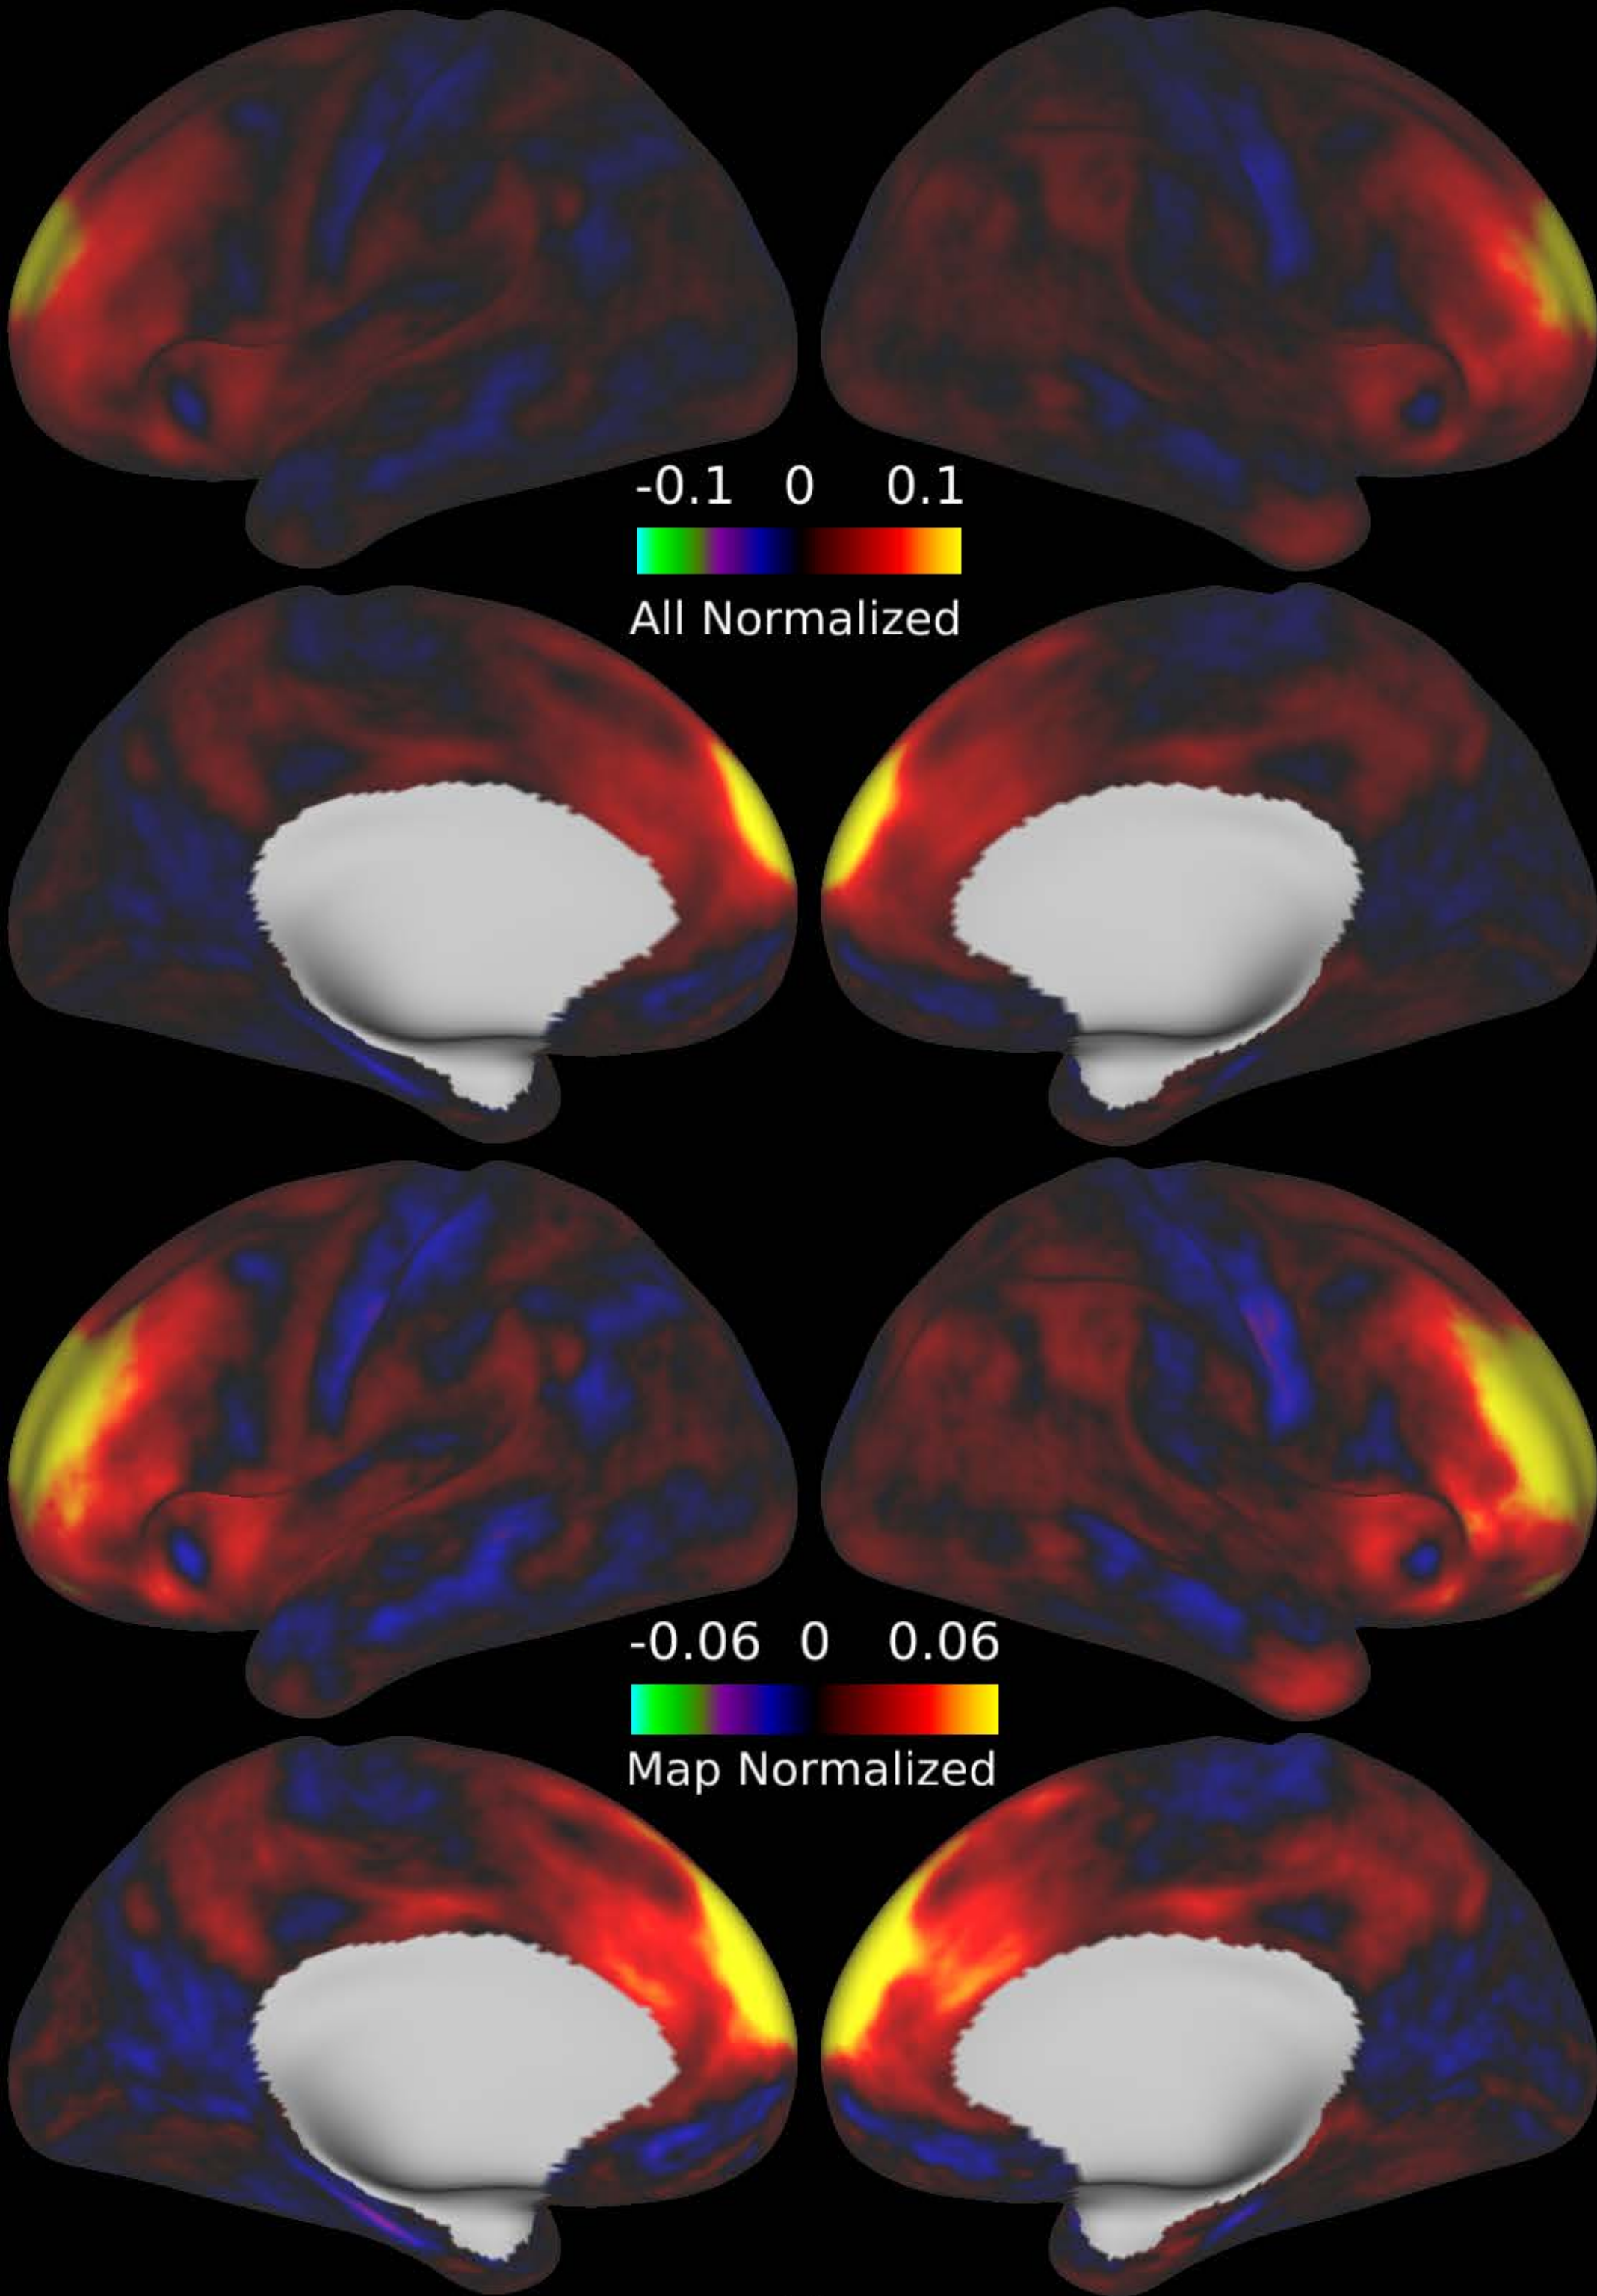

Hertz

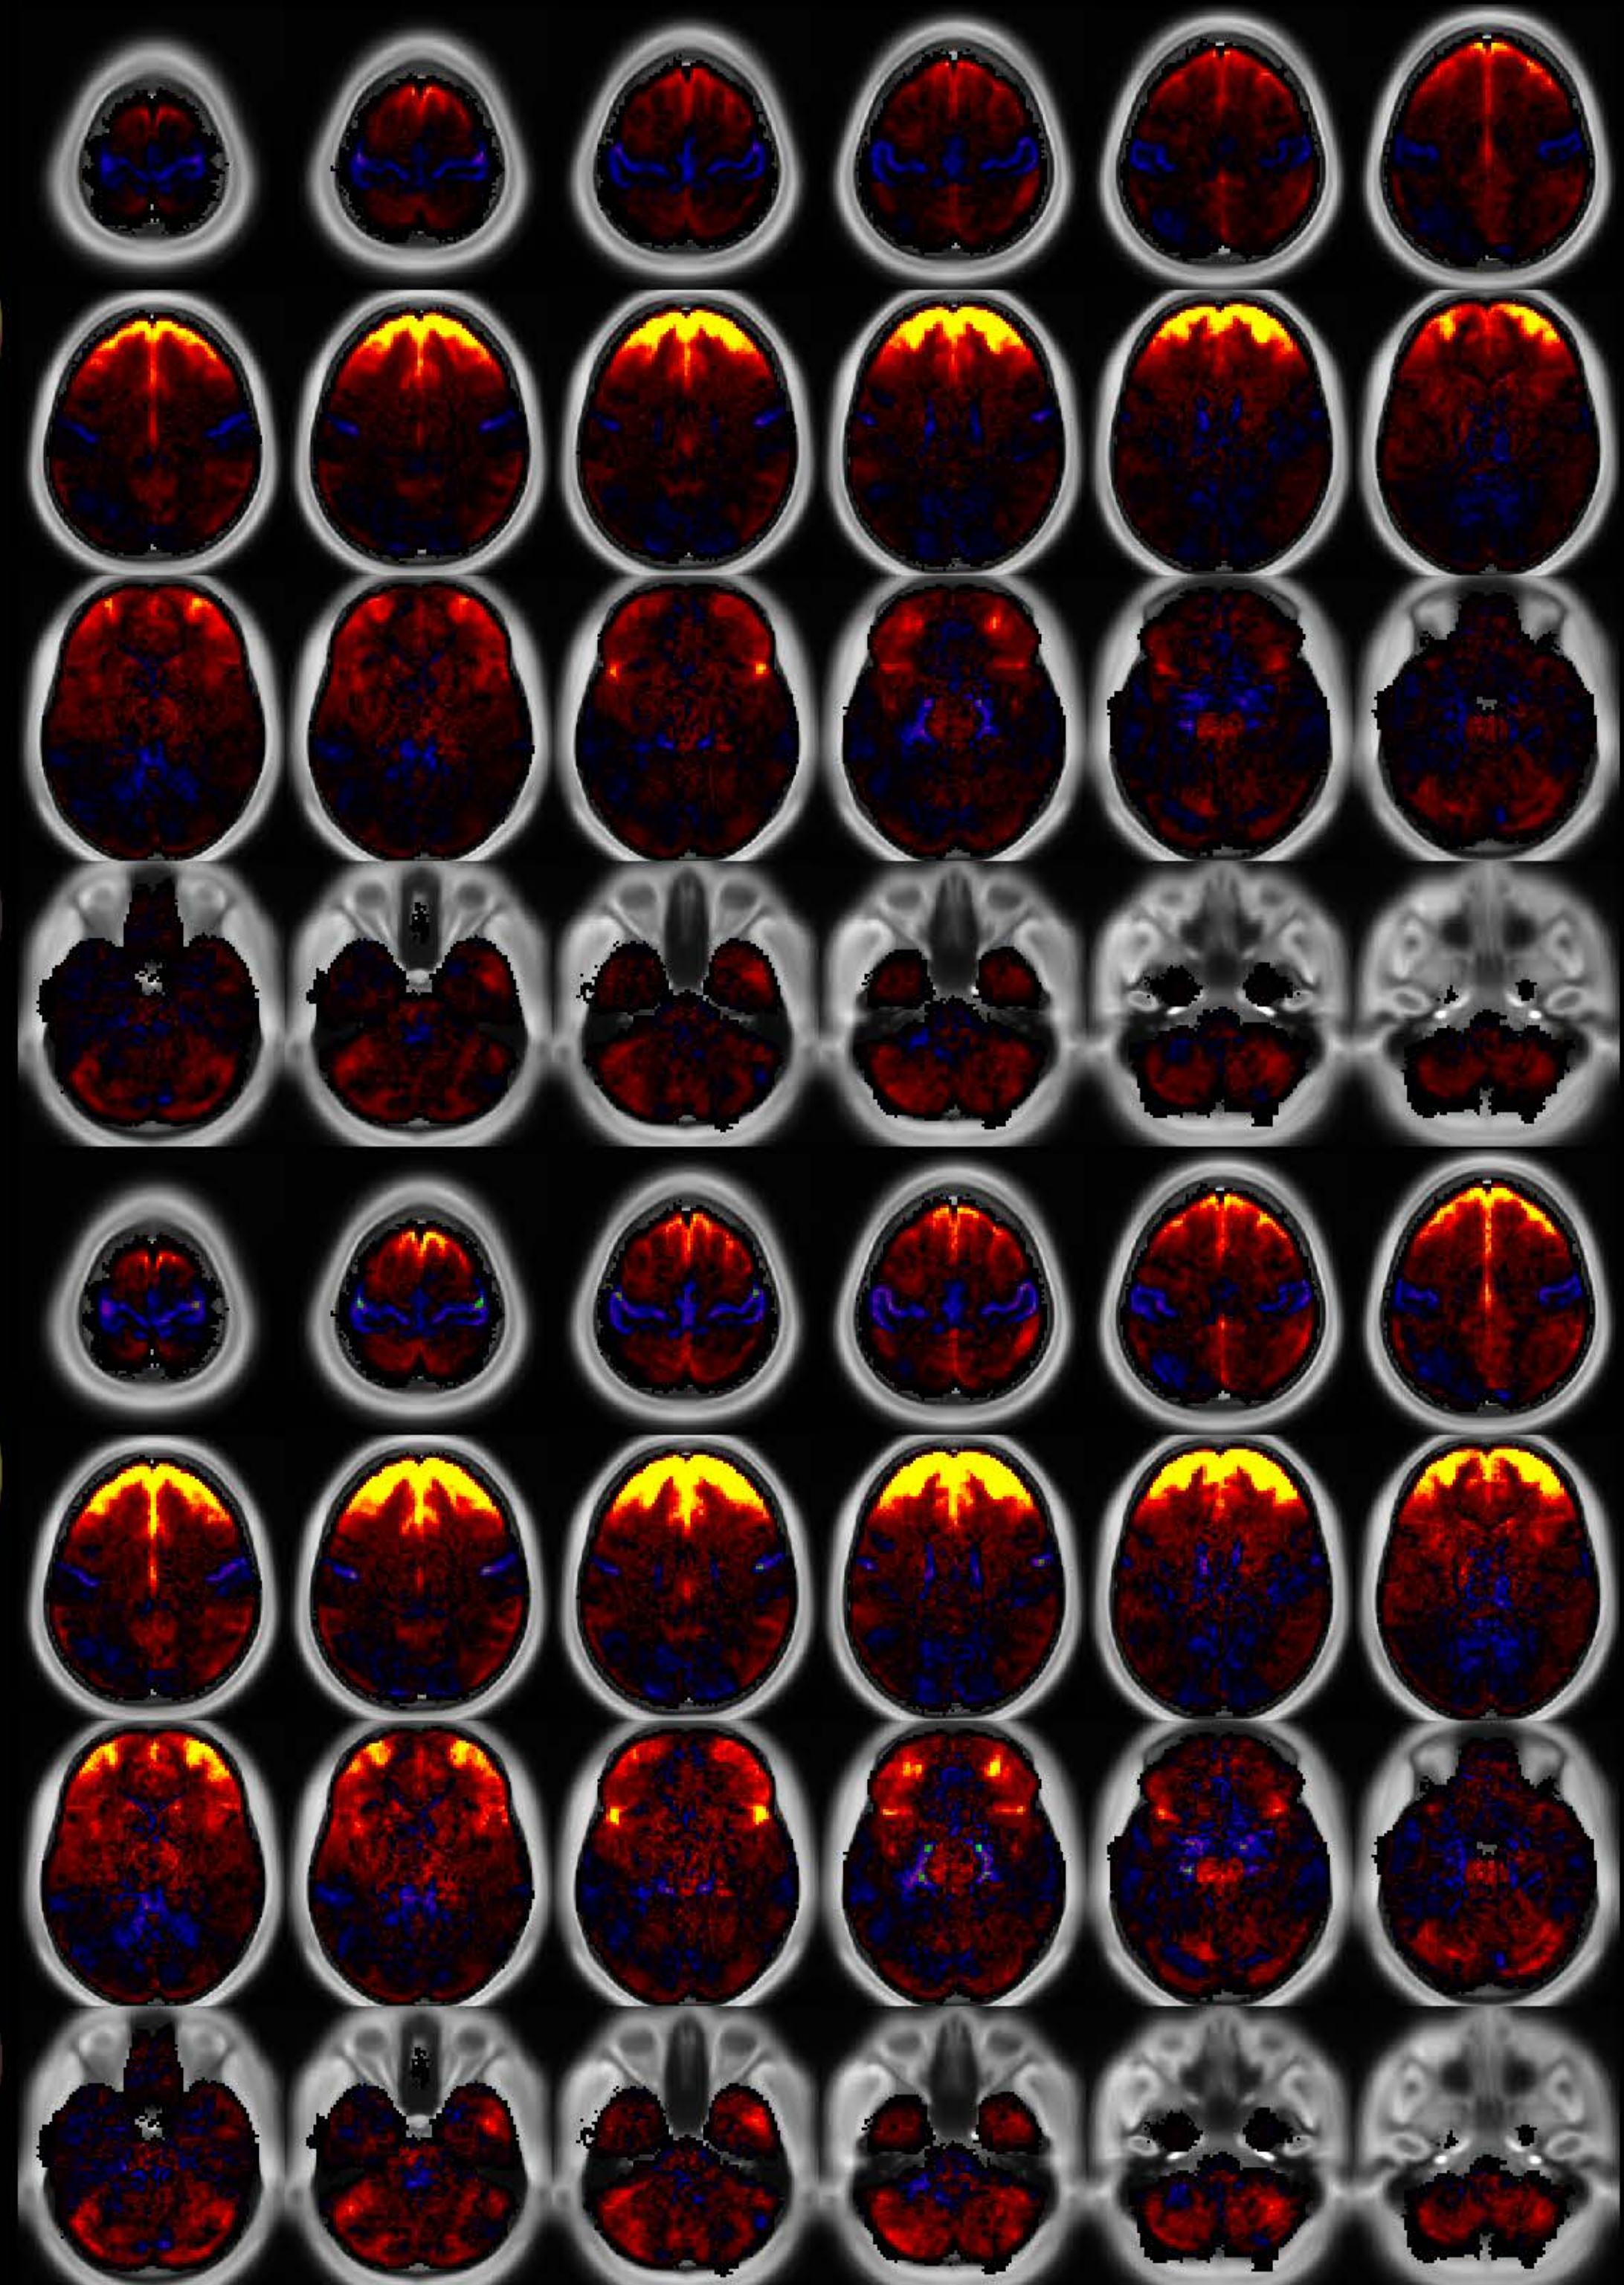

Seconds

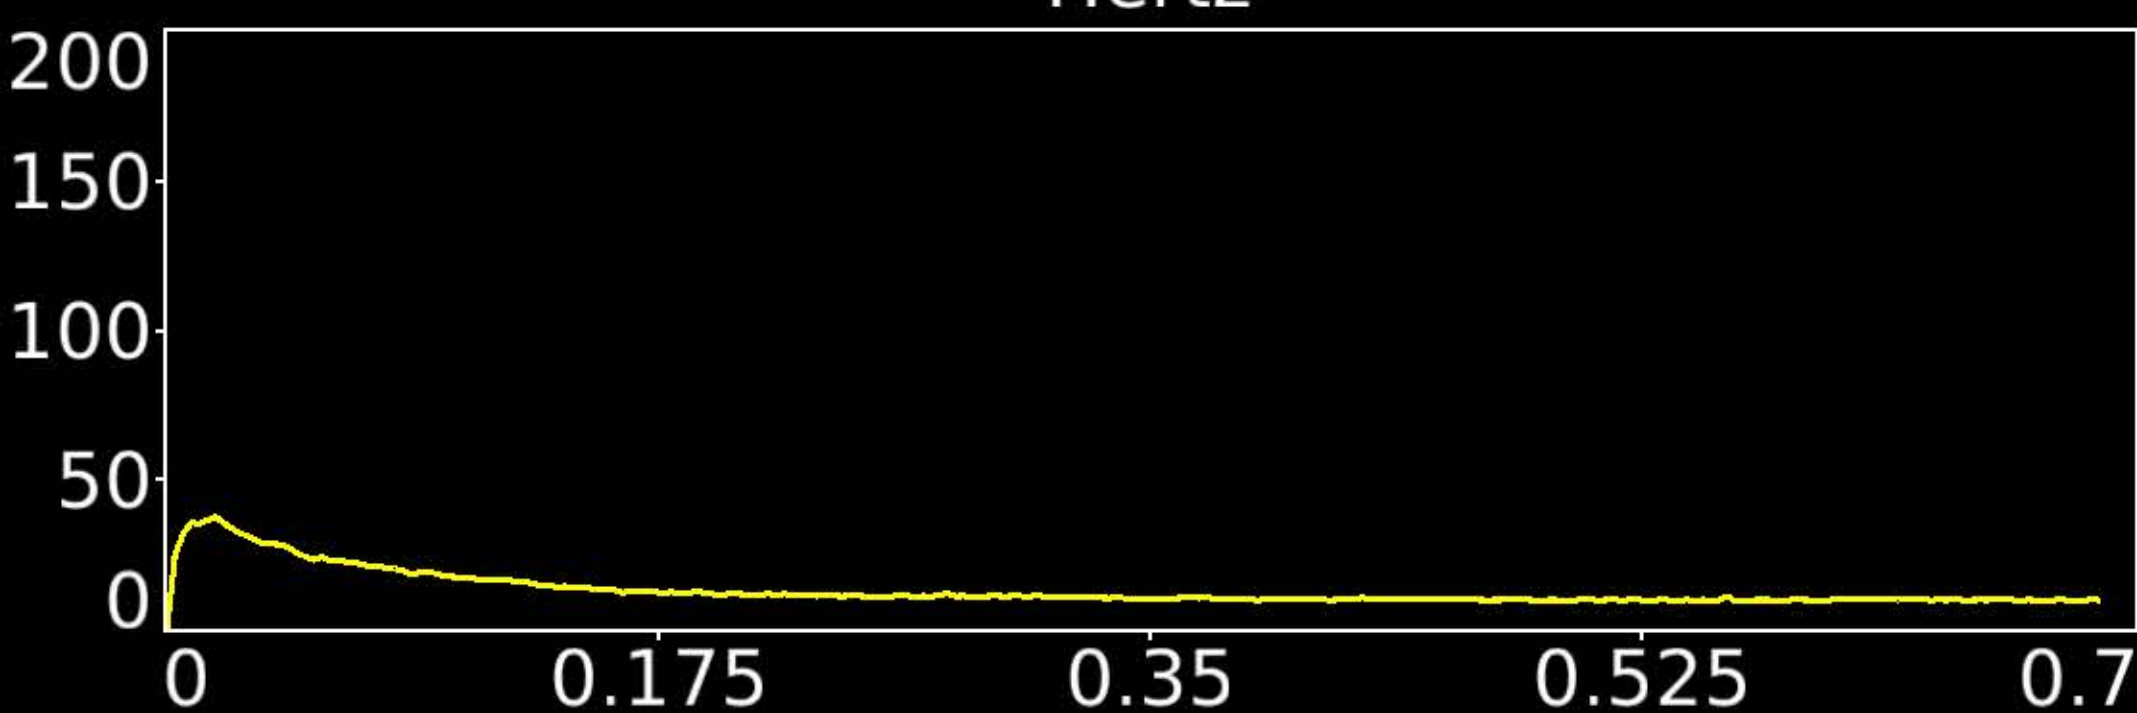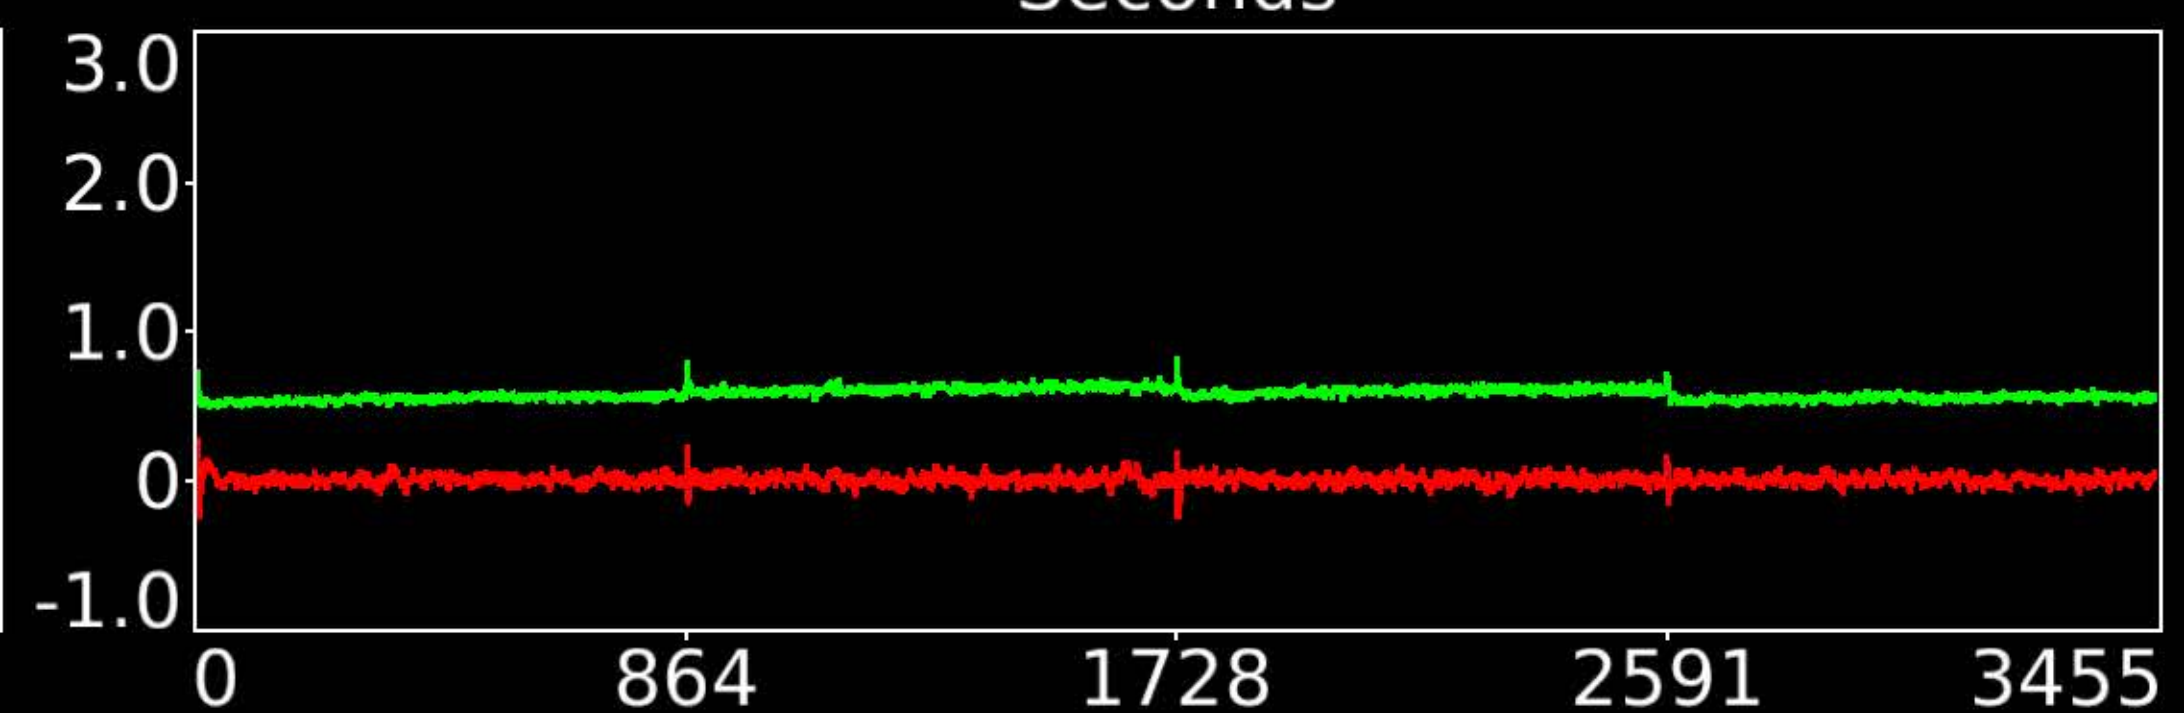

|                          |                            |                            |  |
|--------------------------|----------------------------|----------------------------|--|
| Number & Class: 70 Noise |                            | Name: Coil?                |  |
| RVT Correlated: No       | DVARS Dip Associated: Yes  | Cross-Subject Variable: No |  |
| Single Subject: No       | % Variance Explained: 0.52 | Globality Index: 1.42      |  |
| Task Component: 64       | Taskr Component: 55        | Sleep Noted: No            |  |

Rationale: Spatial map is a band across frontal cortex and white matter; could be related to coil; head motion; or eye motion



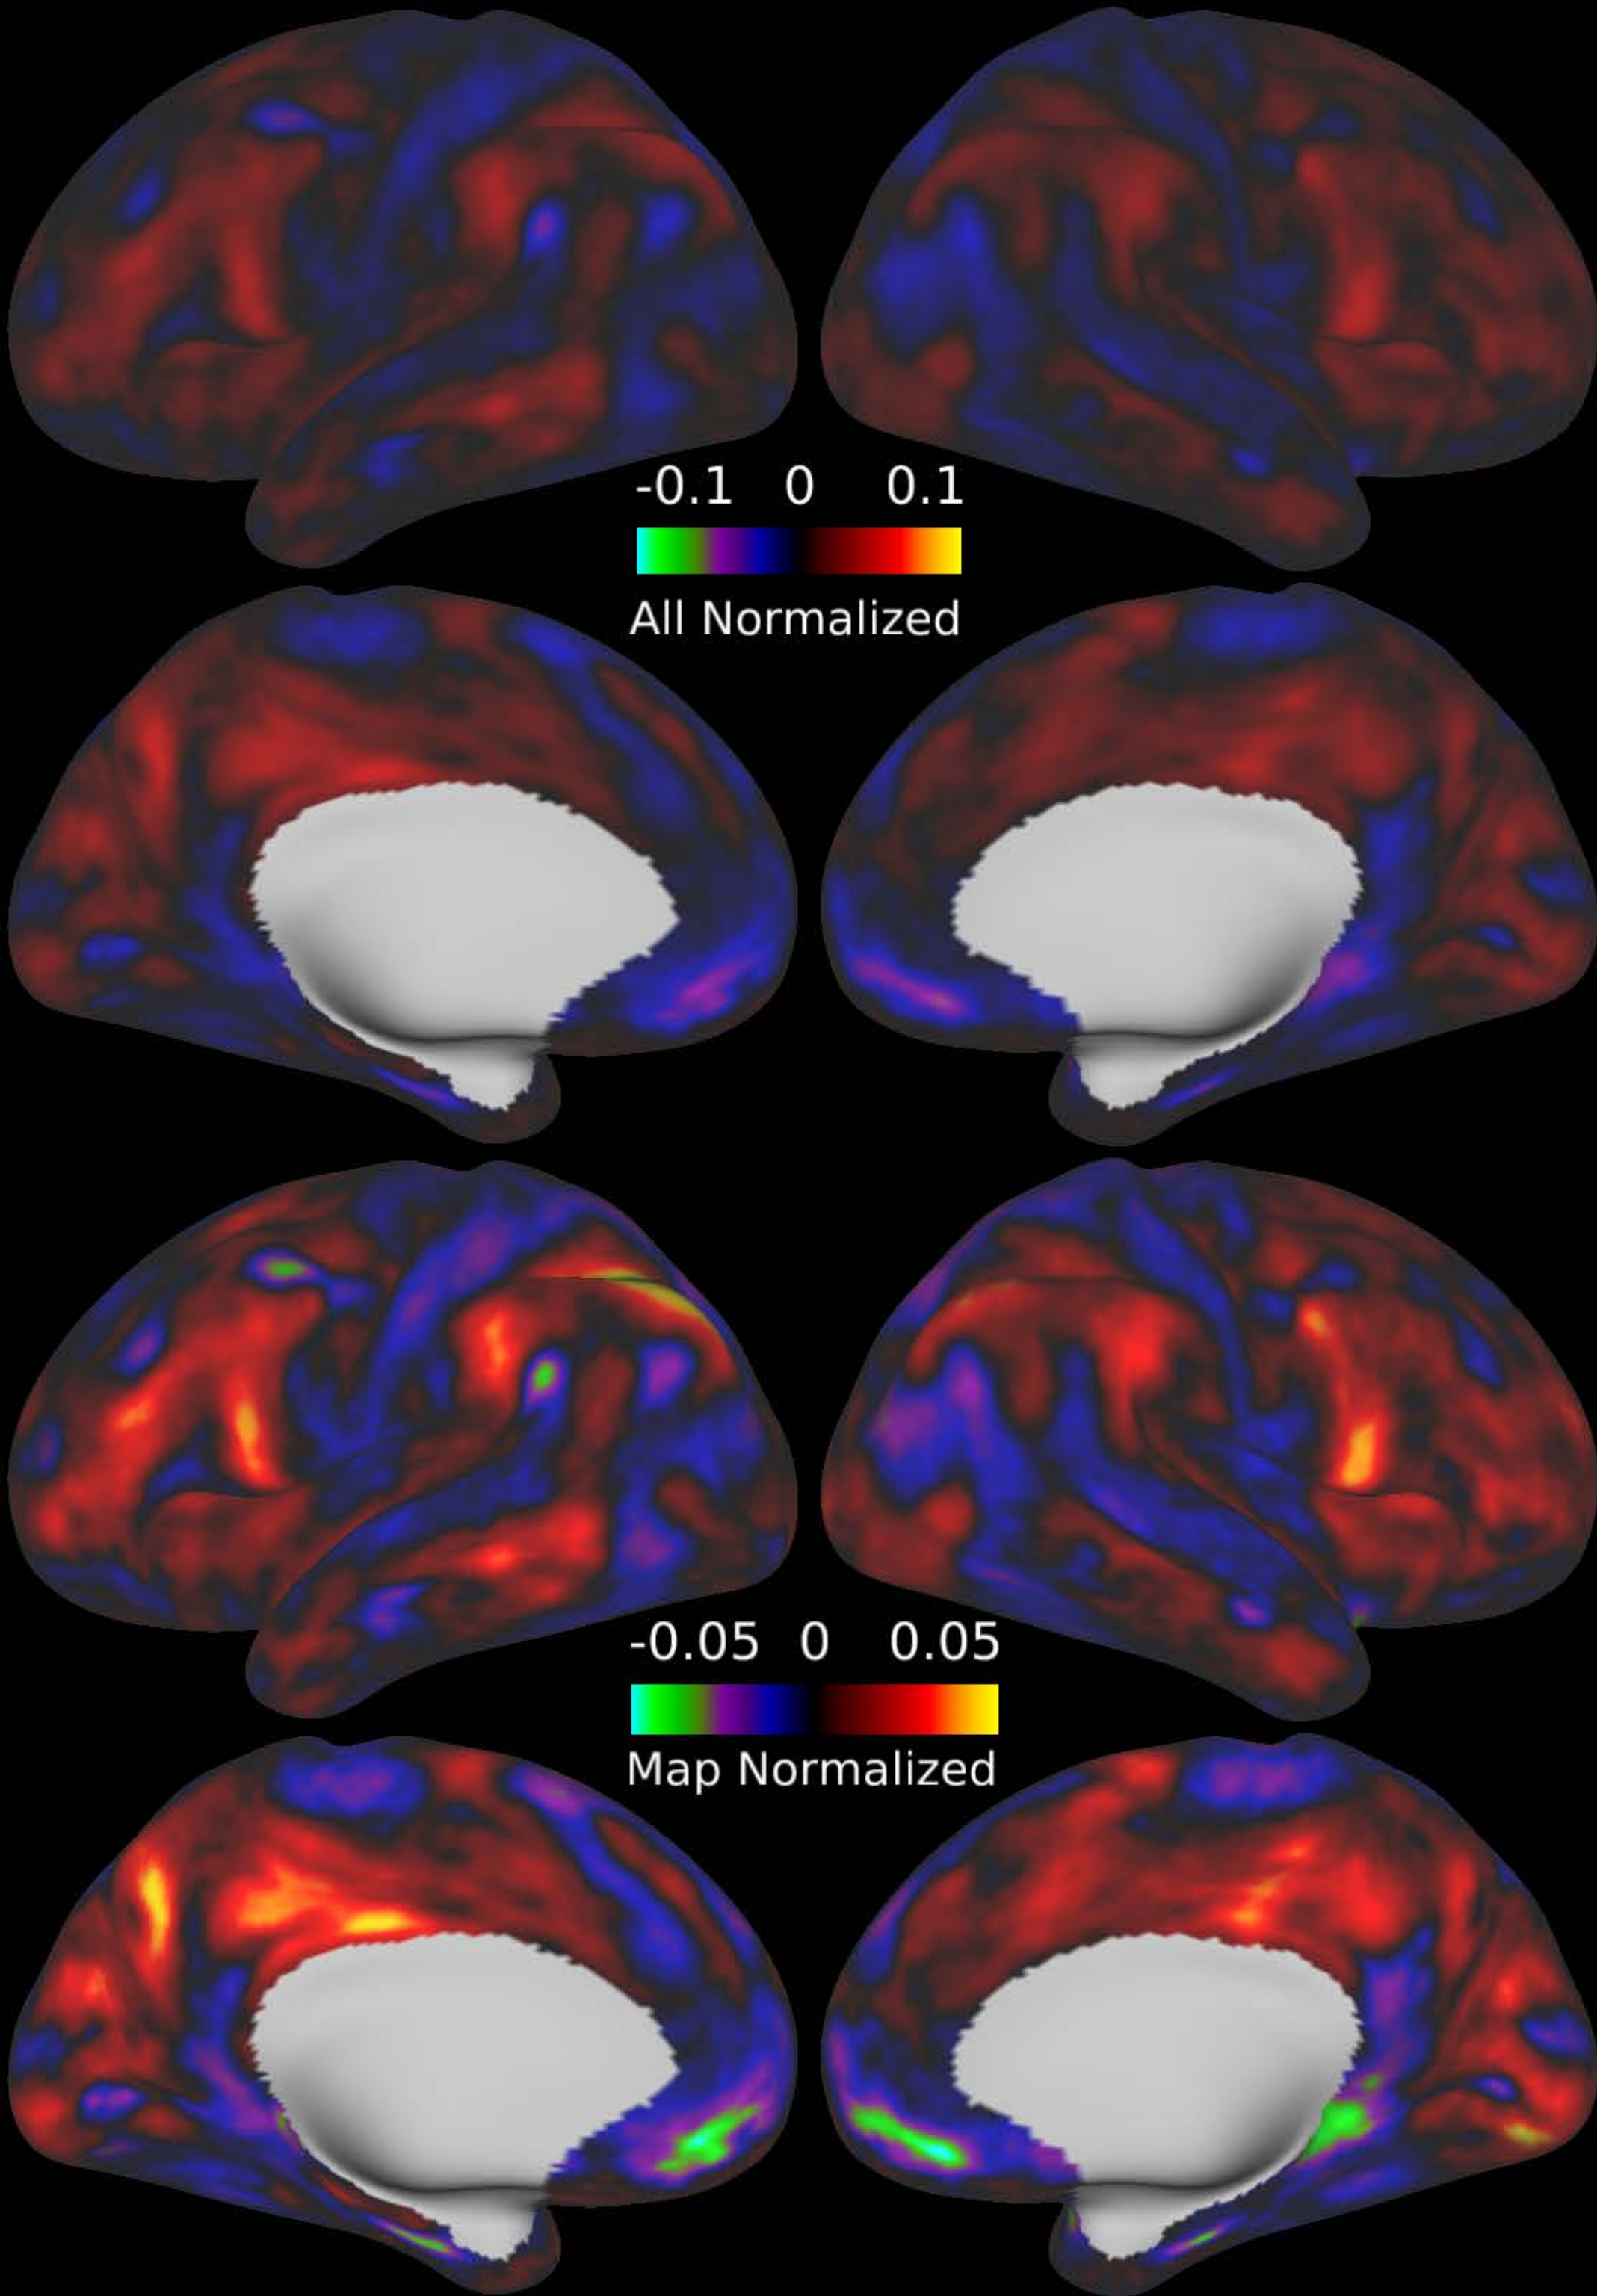

Hertz

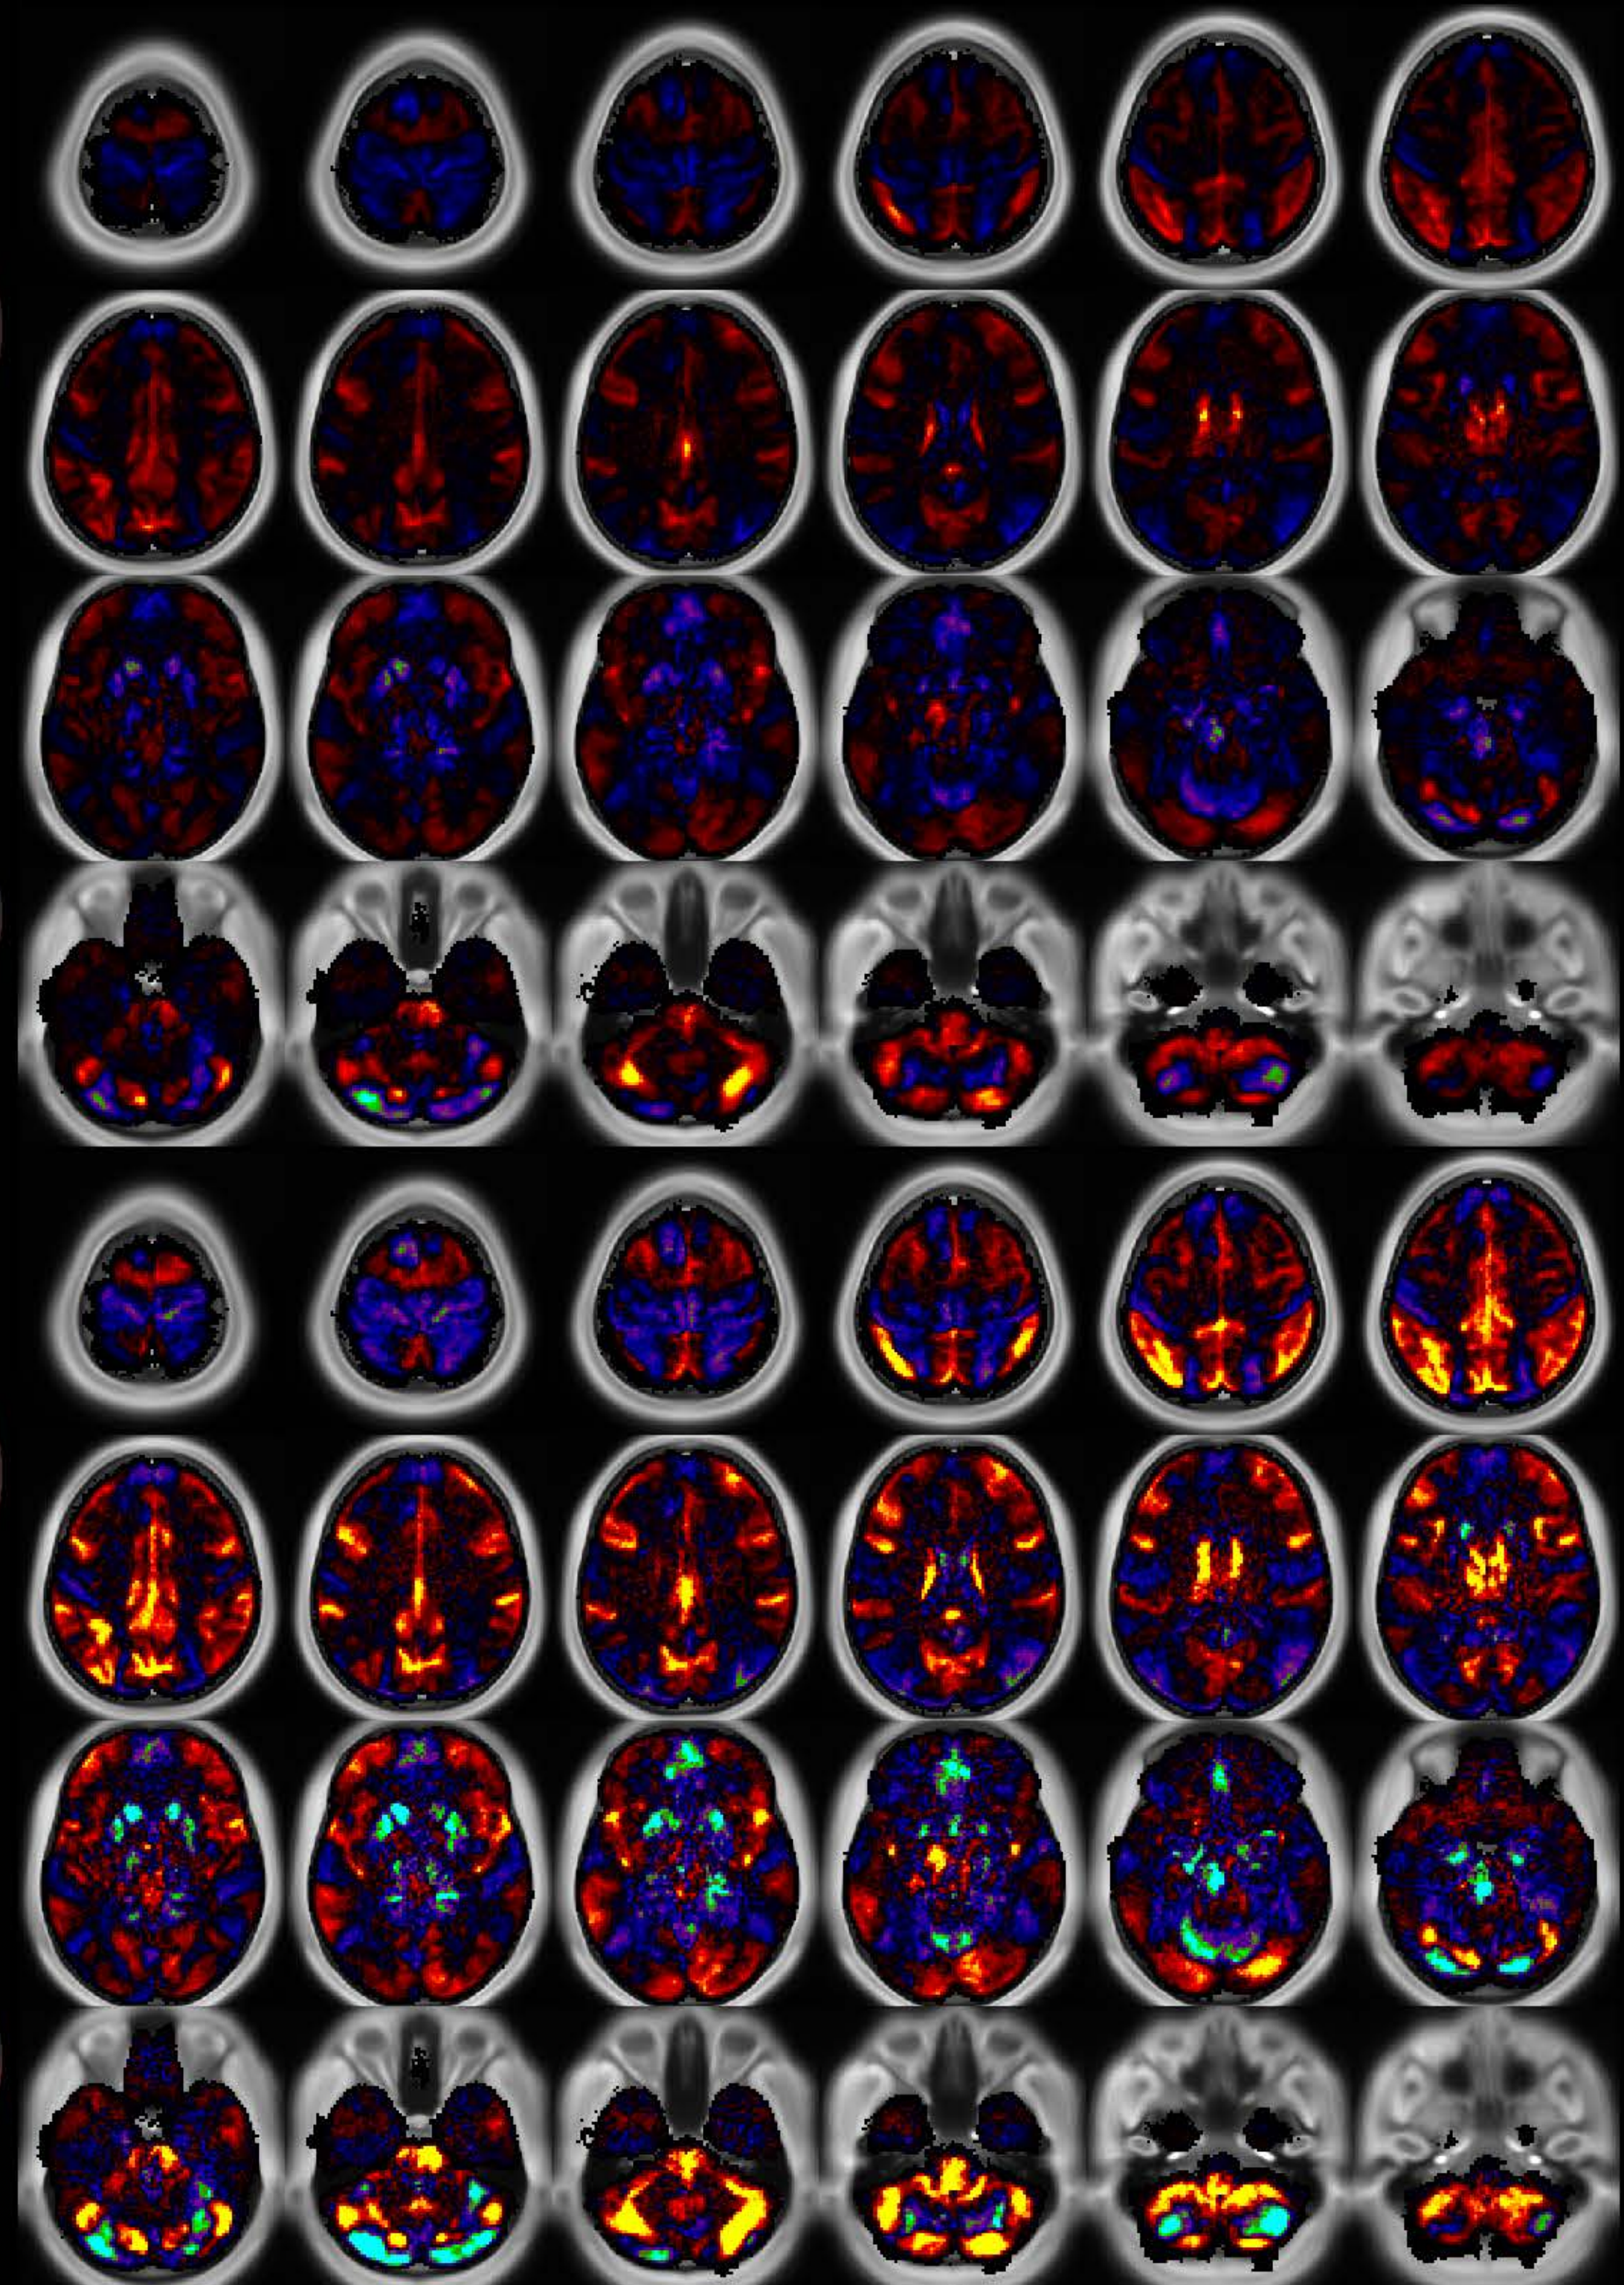

Seconds

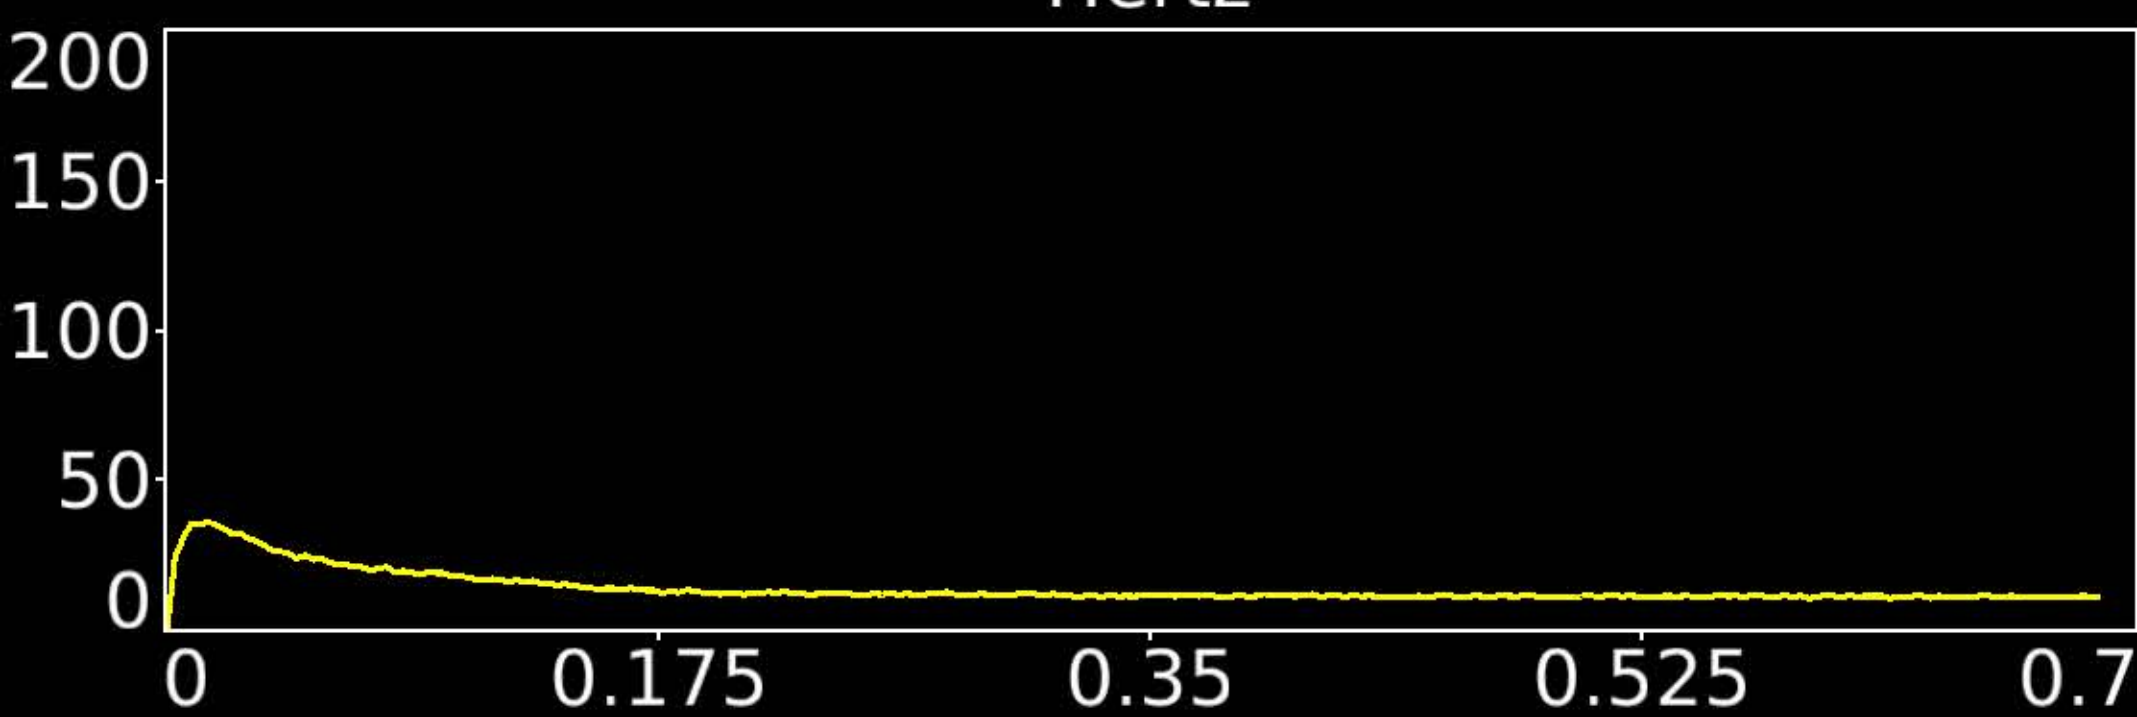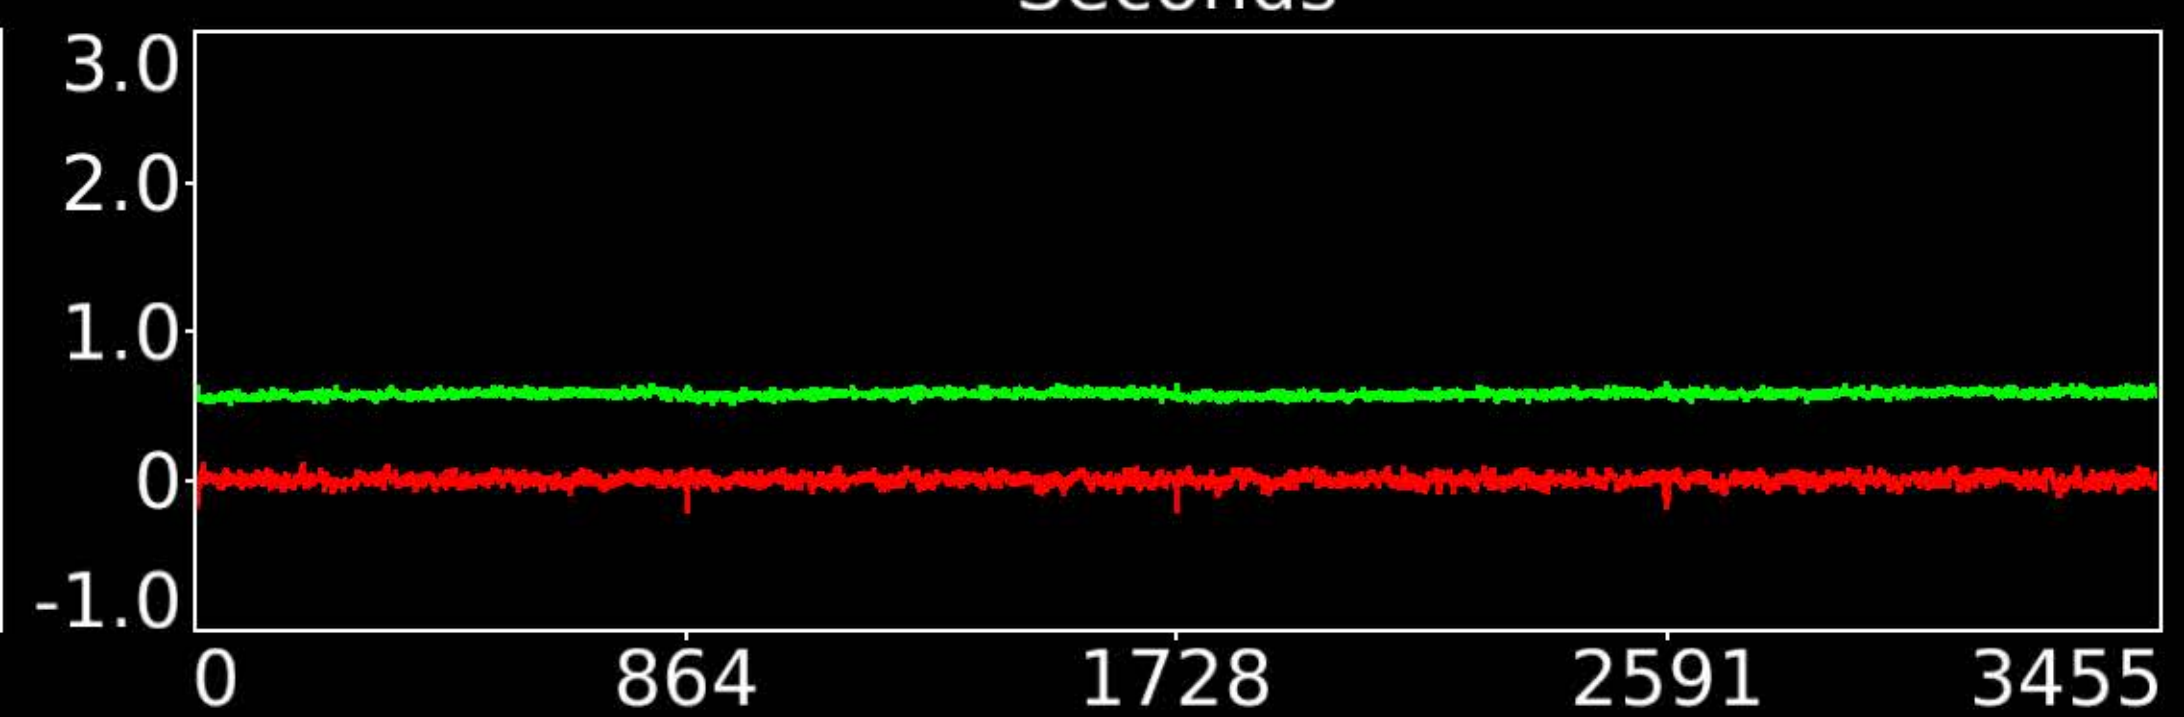

|                                                                                |                            |                                                 |  |
|--------------------------------------------------------------------------------|----------------------------|-------------------------------------------------|--|
| Number & Class: 71 Noise                                                       |                            | Name: Single Subject Global Physiological Noise |  |
| RVT Correlated: No                                                             | DVARS Dip Associated: No   | Cross-Subject Variable: No                      |  |
| Single Subject: Yes                                                            | % Variance Explained: 0.51 | Globality Index: 0.32                           |  |
| Task Component: No                                                             | Taskr Component: No        | Sleep Noted: No                                 |  |
| Rationale: Single subject component with high correlation to global timecourse |                            |                                                 |  |



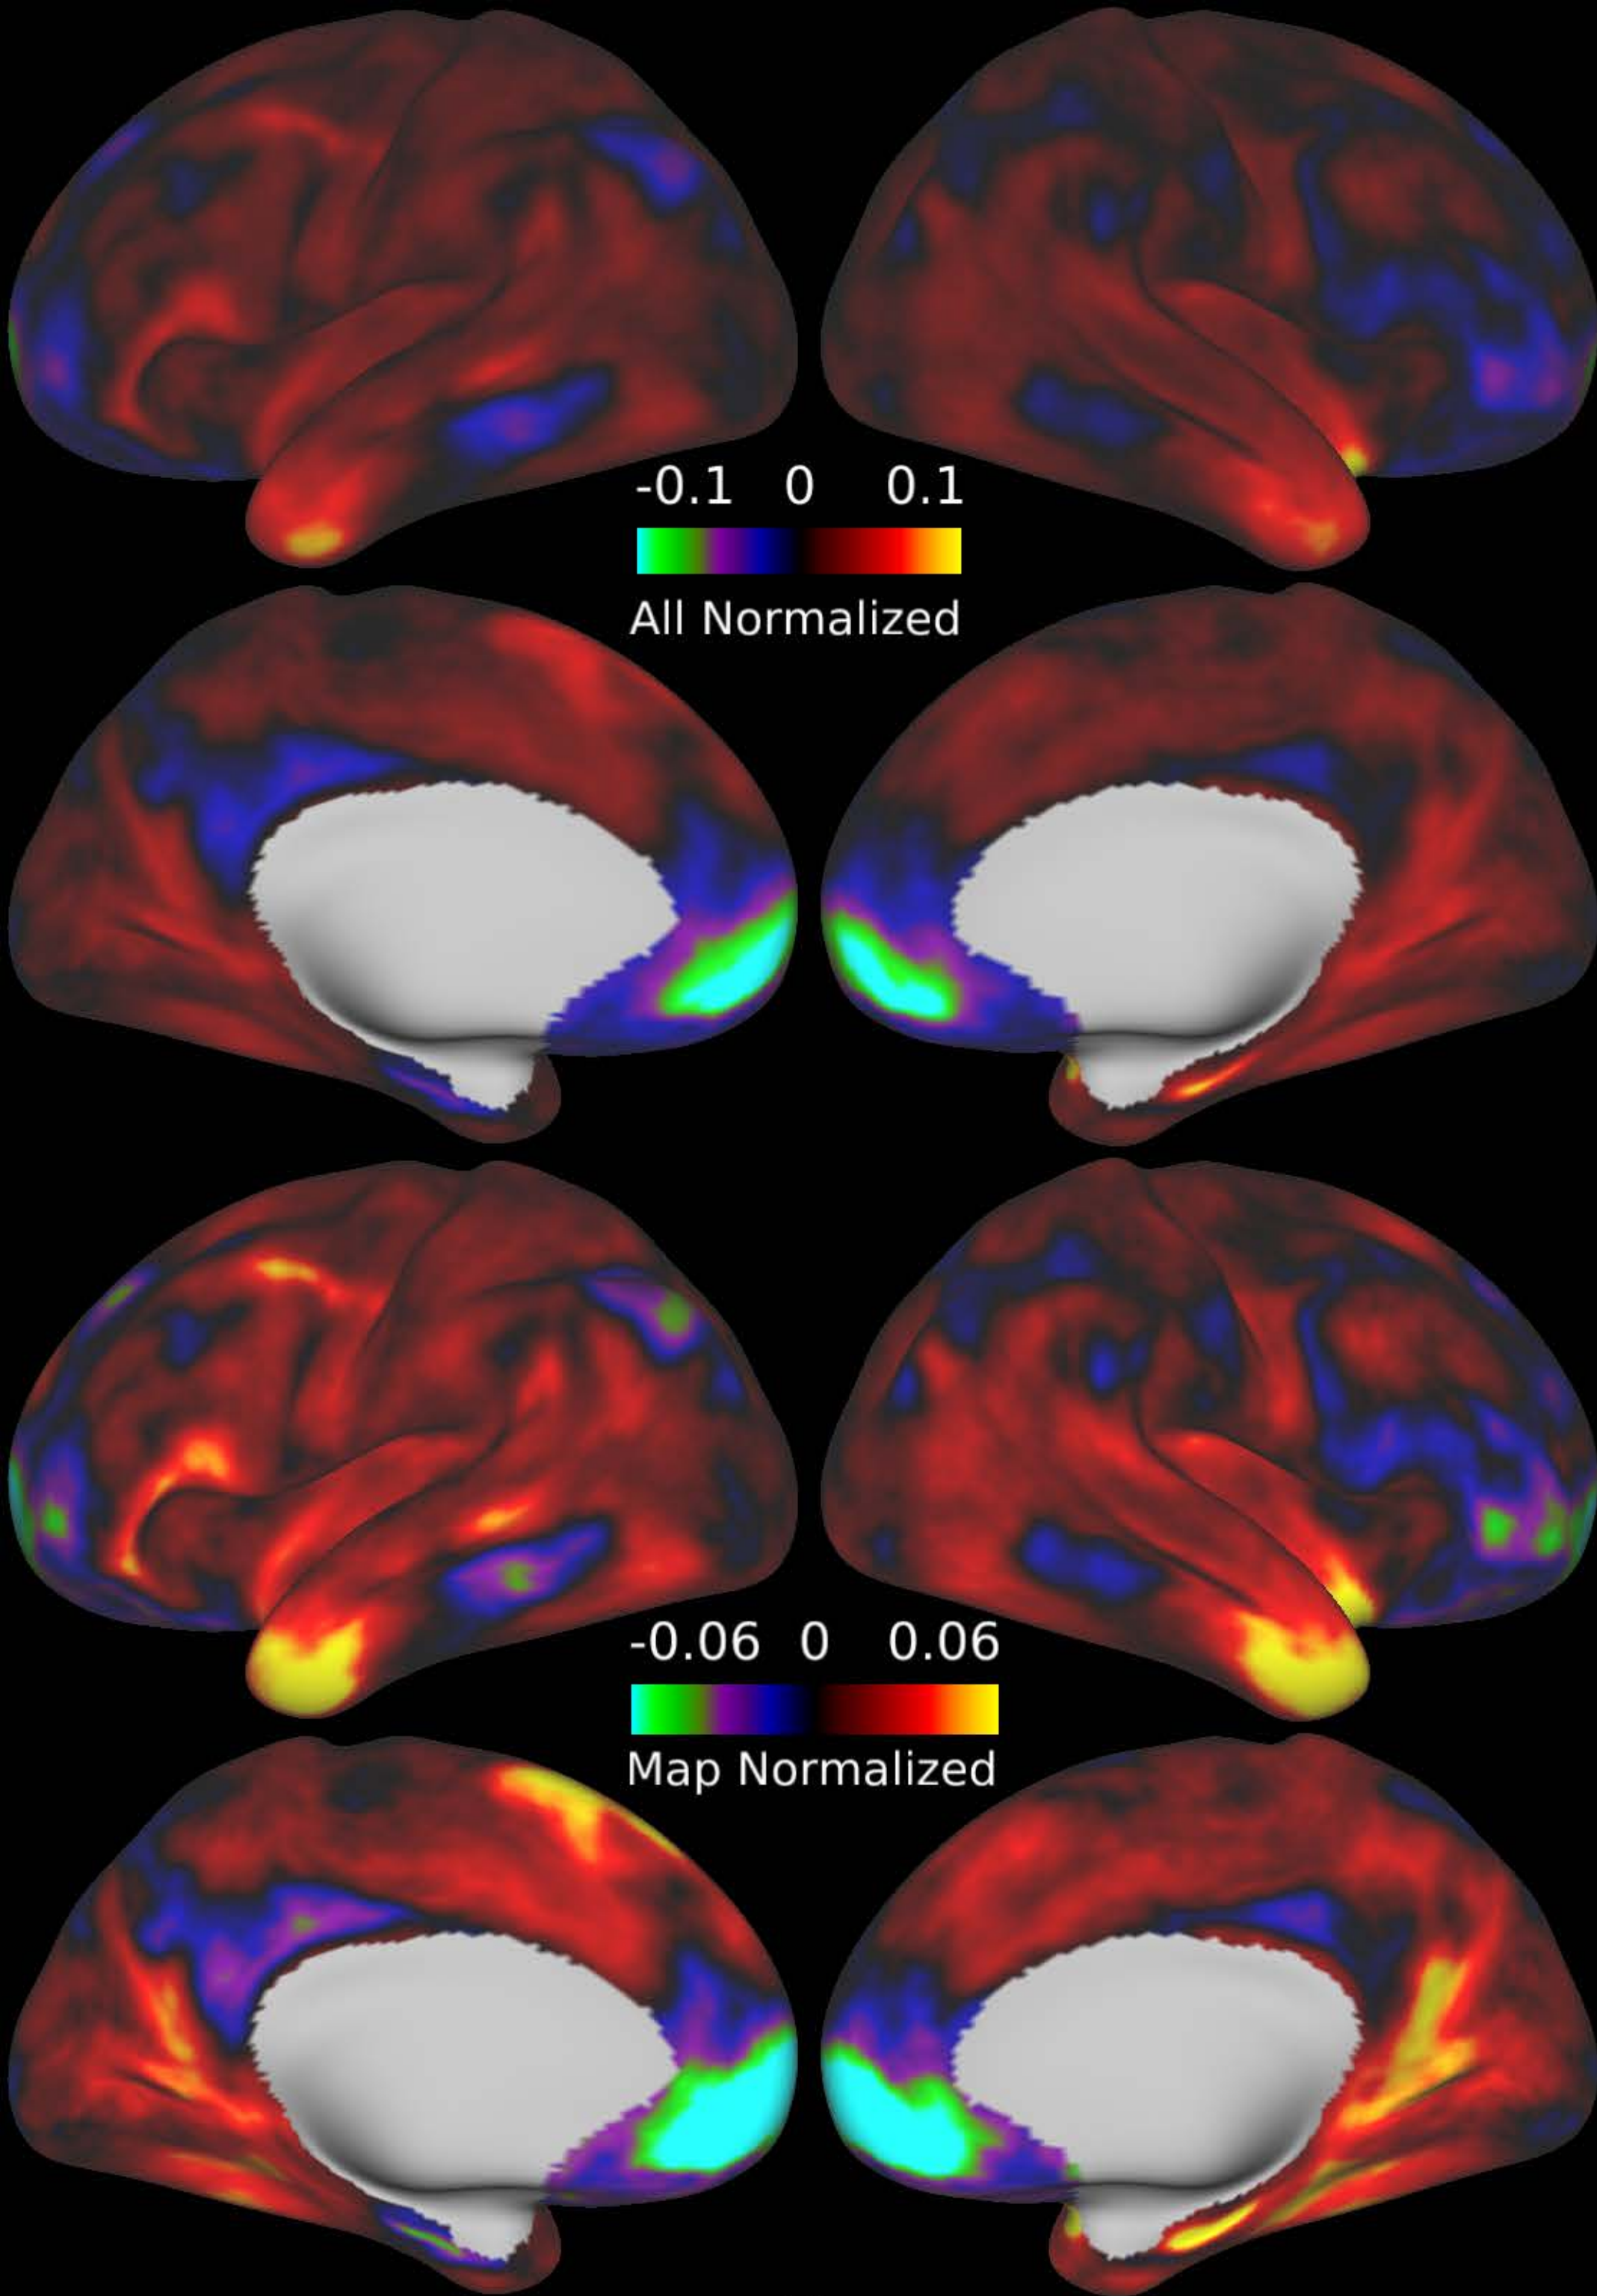

Hertz

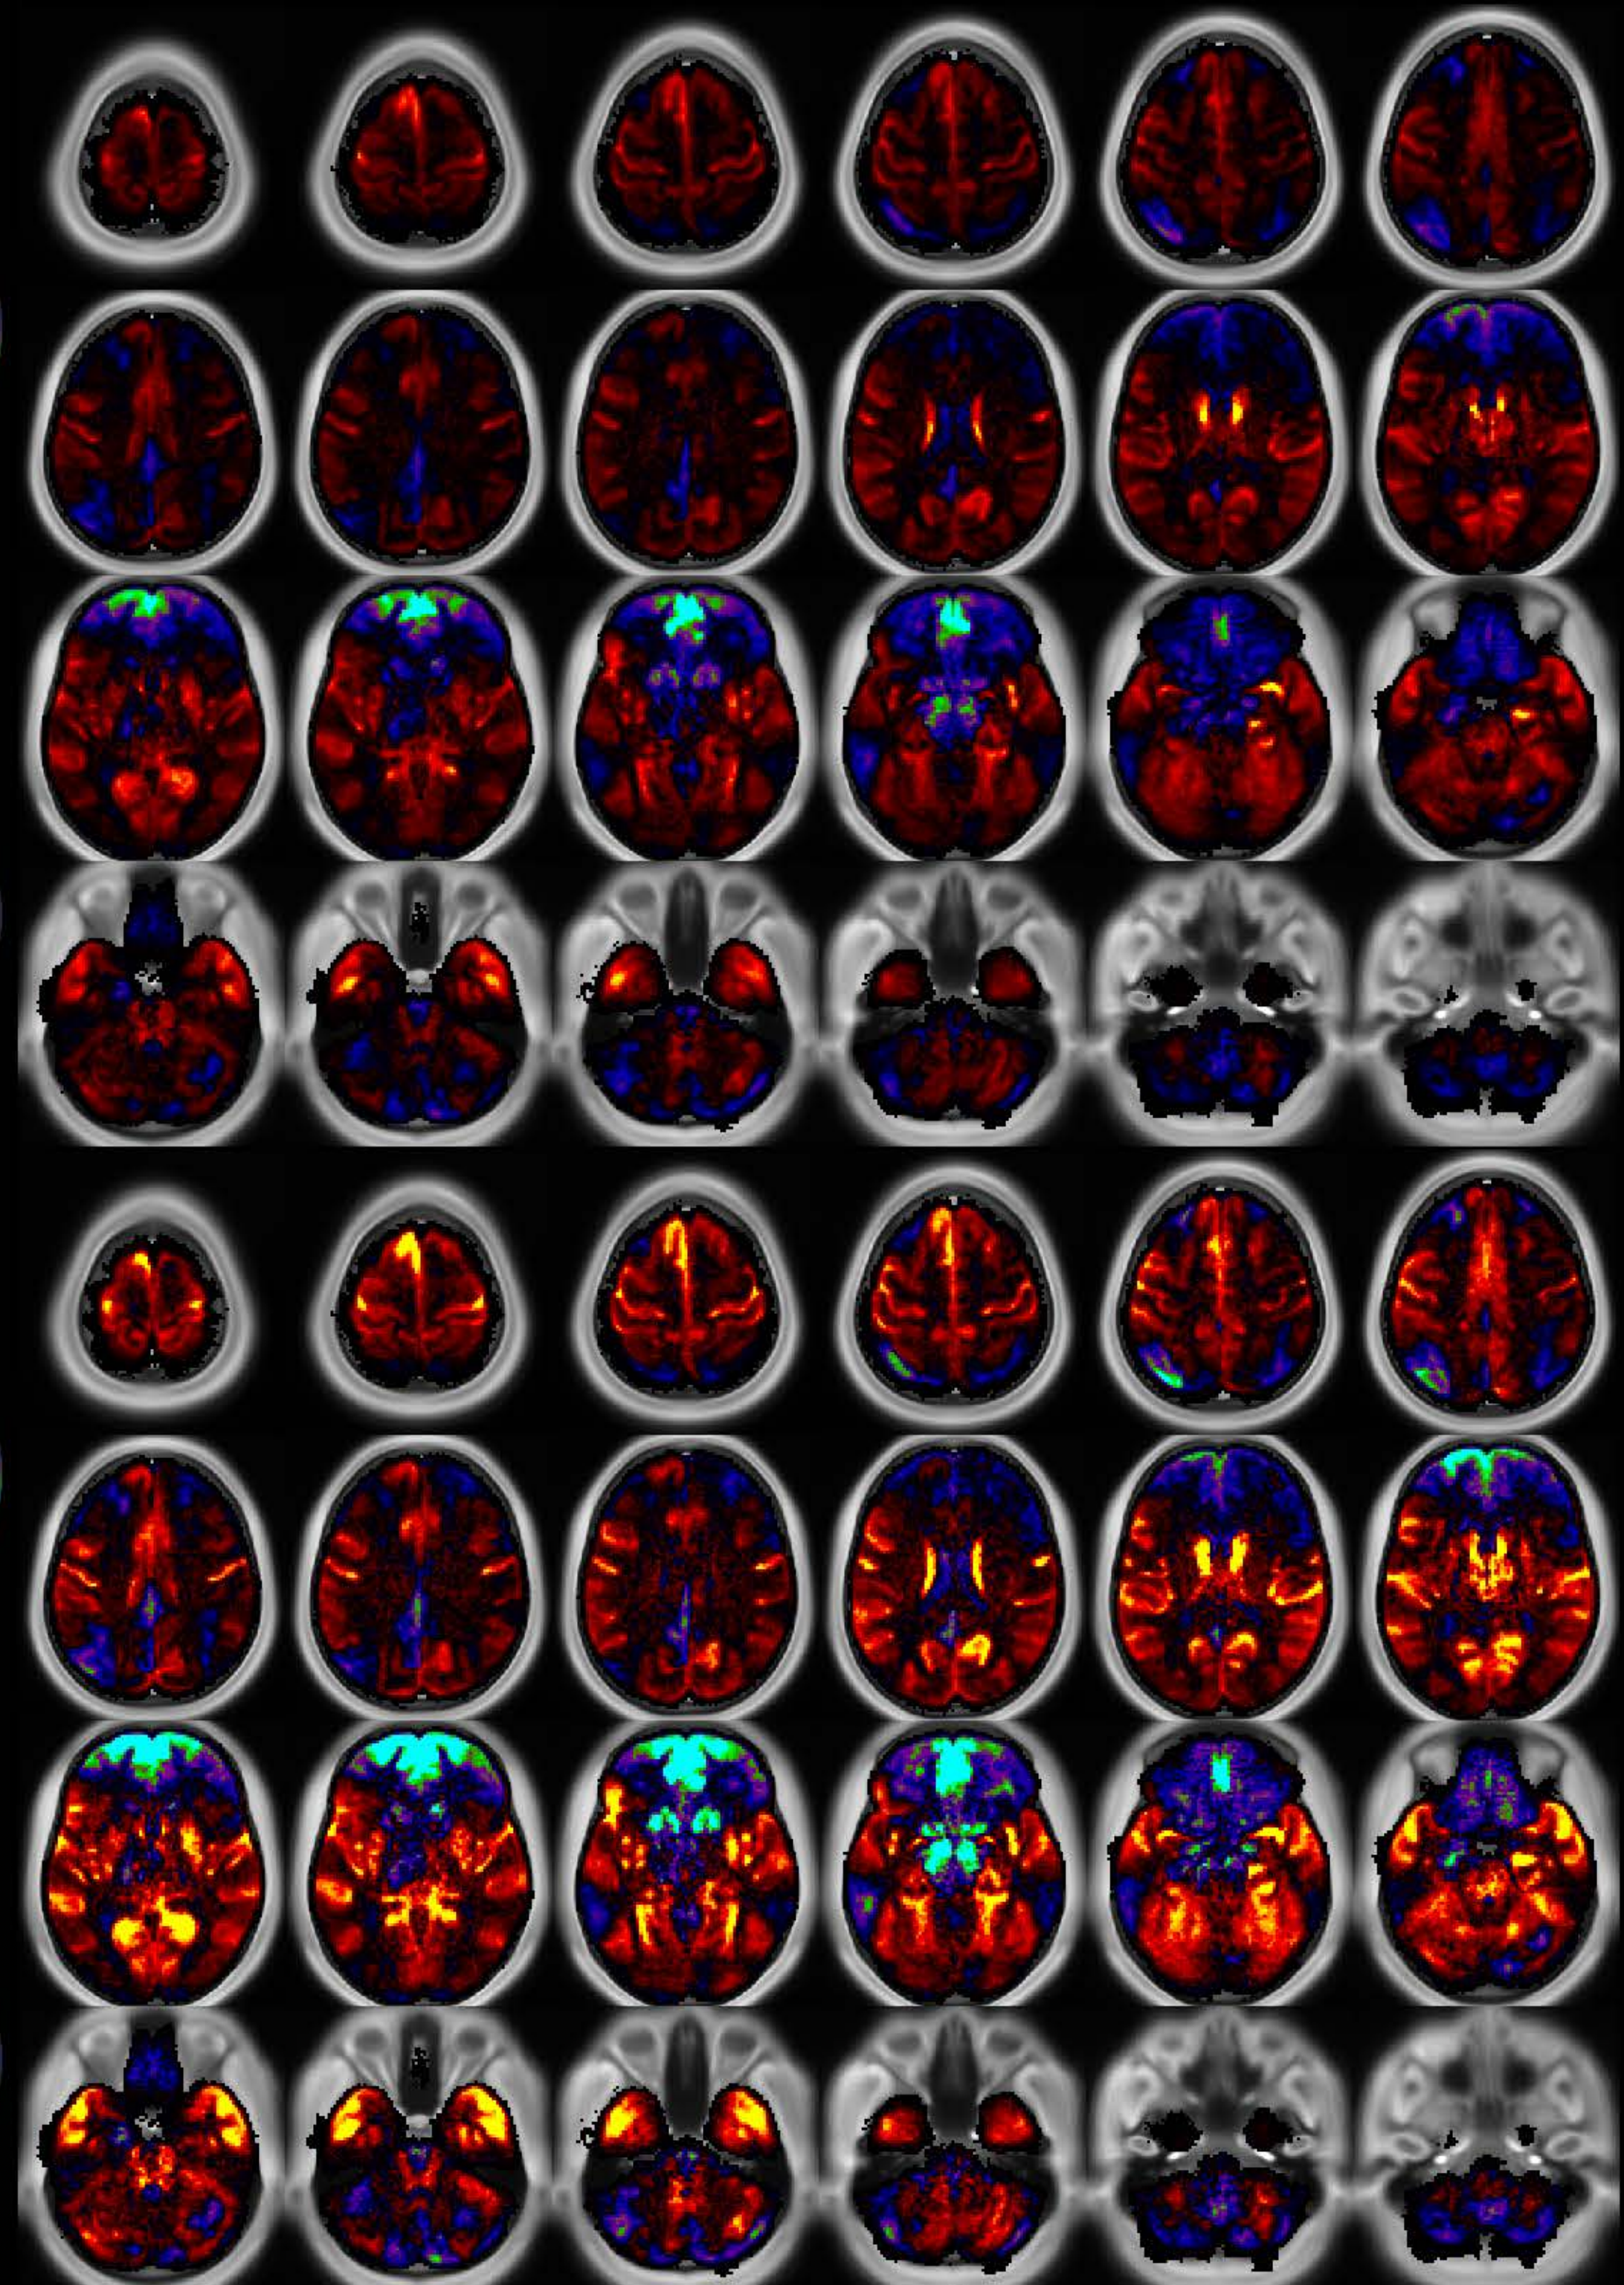

Seconds

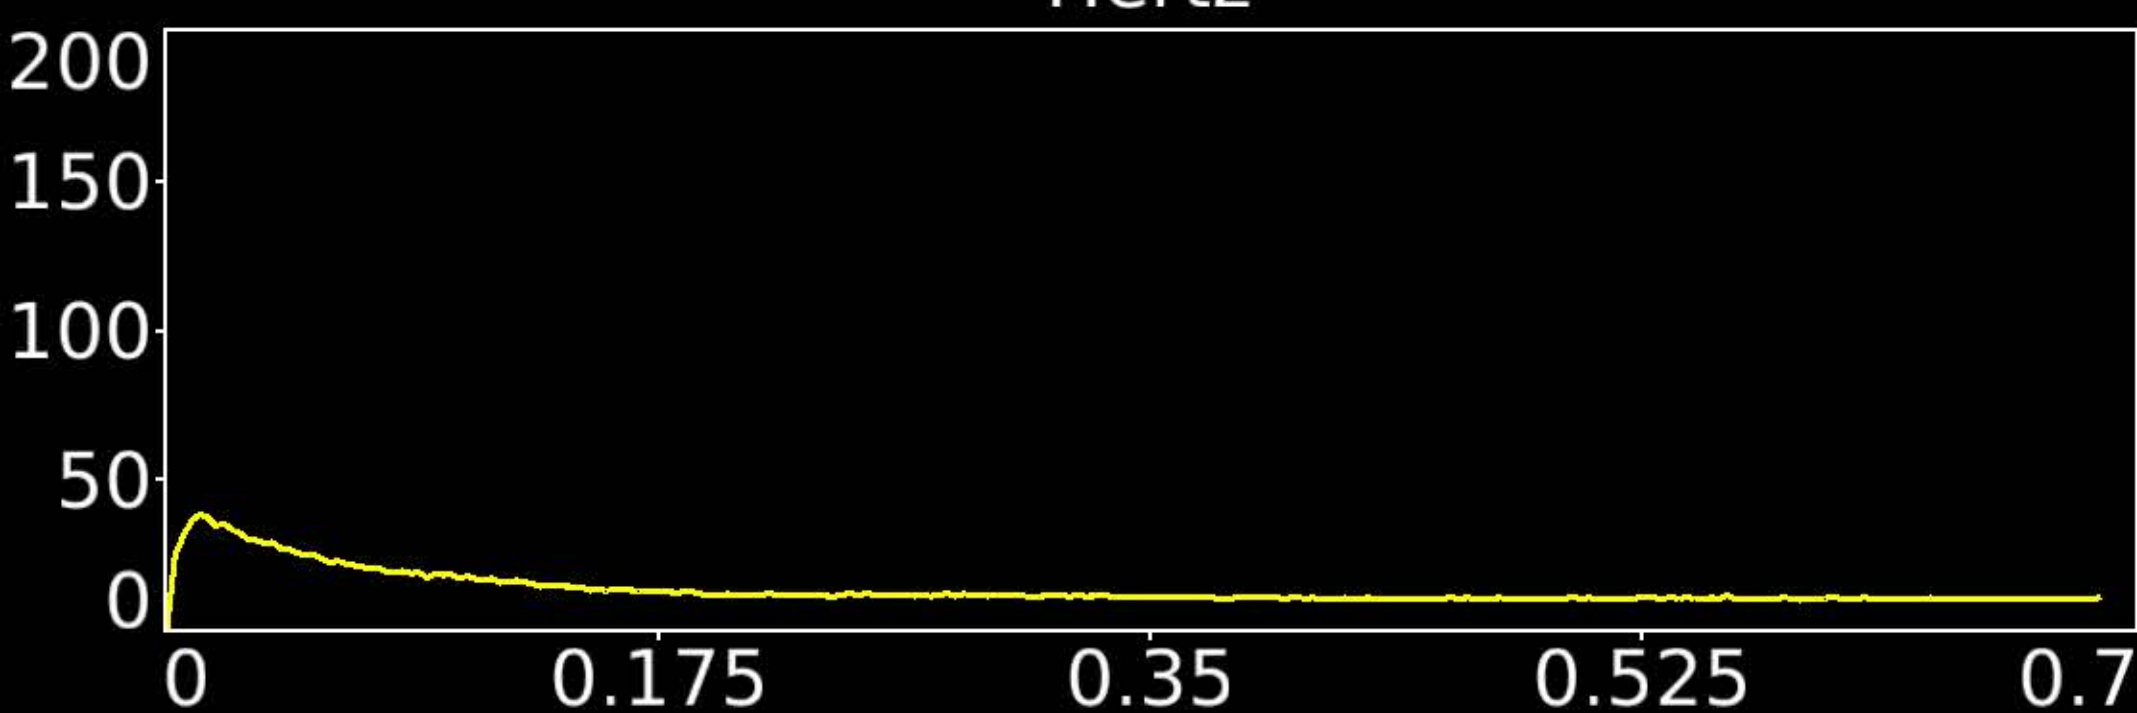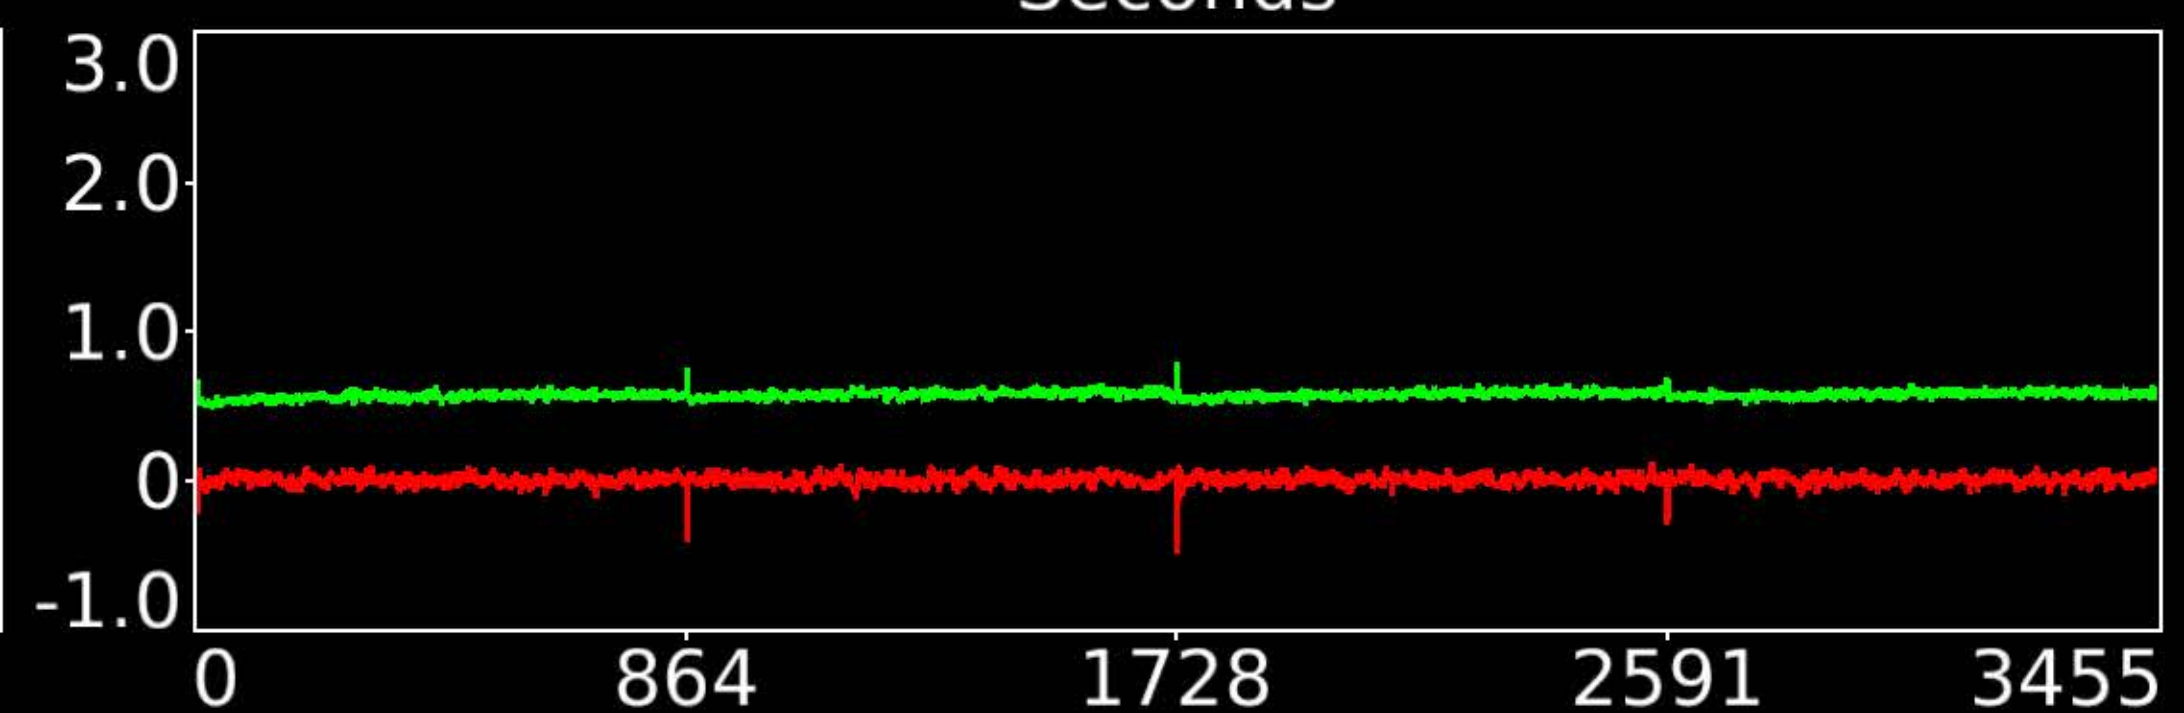

|                                                                                |                           |                            |  |
|--------------------------------------------------------------------------------|---------------------------|----------------------------|--|
| Number & Class: 72 Noise                                                       |                           | Name: Coil?                |  |
| RVT Correlated: No                                                             | DVARS Dip Associated: No  | Cross-Subject Variable: No |  |
| Single Subject: Yes                                                            | % Variance Explained: 0.5 | Globality Index: 1.36      |  |
| Task Component: No                                                             | Taskr Component: No       | Sleep Noted: No            |  |
| Rationale: Single subject component with high correlation to global timecourse |                           |                            |  |



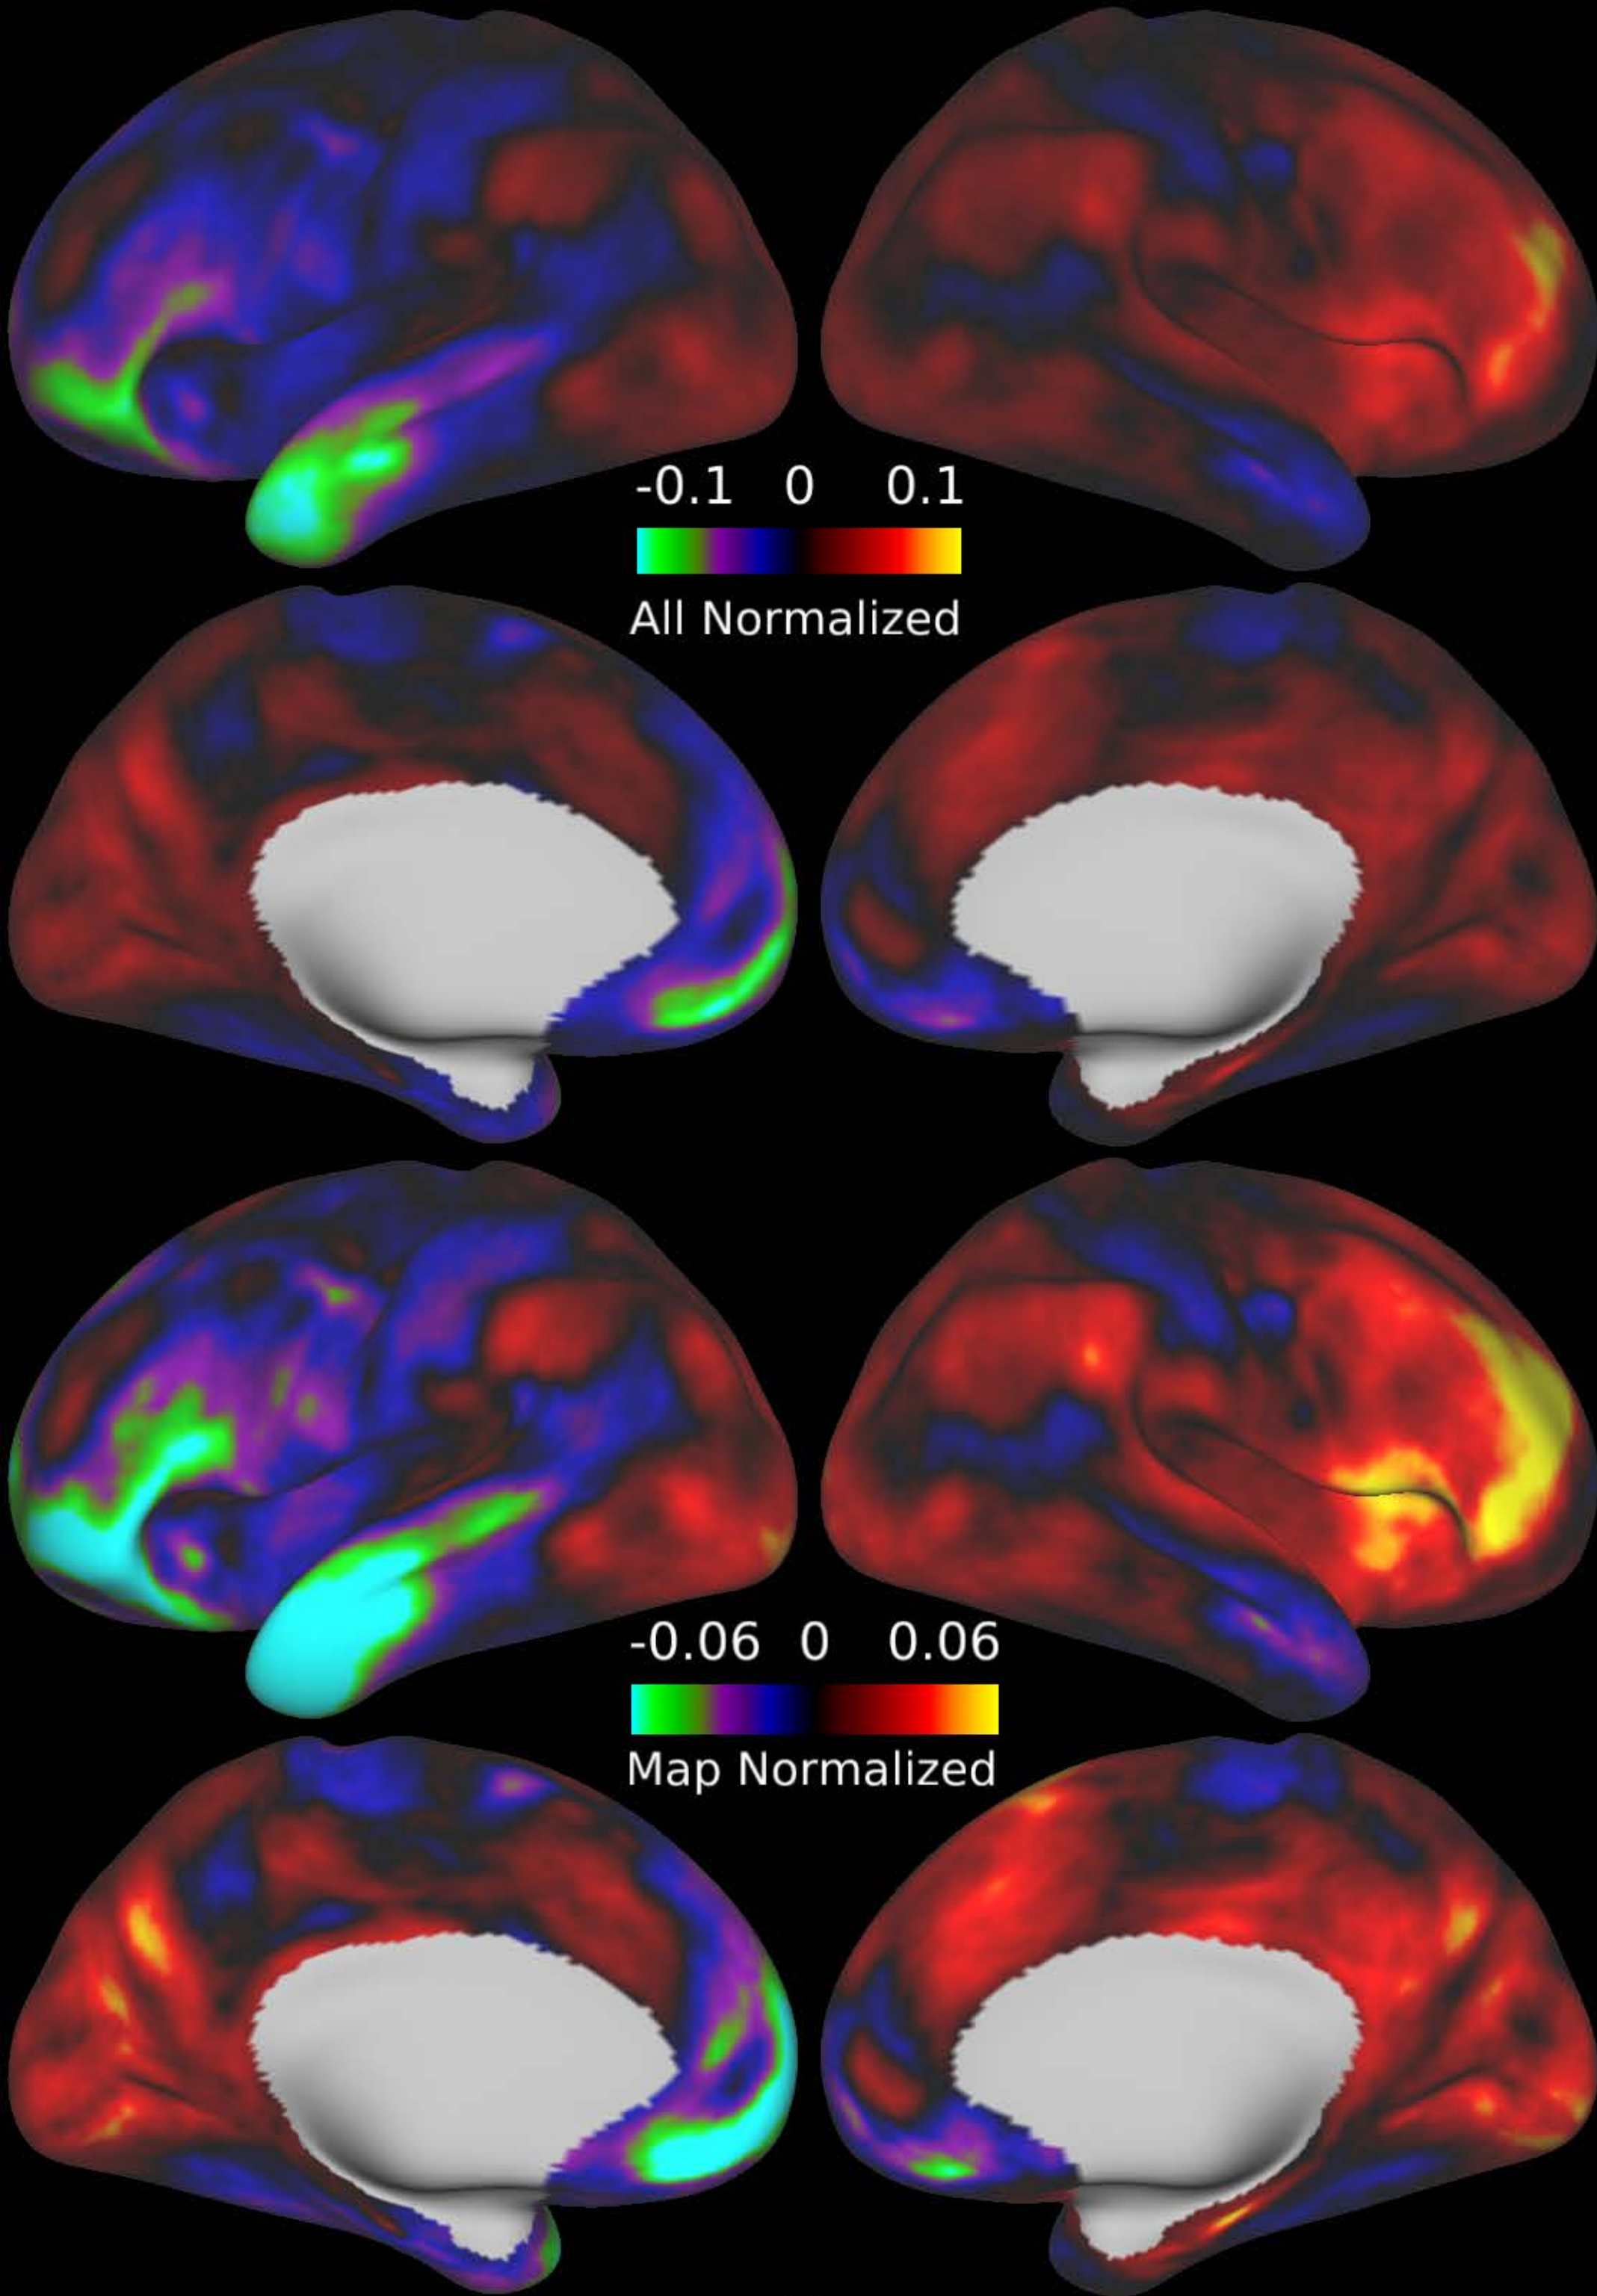

Hertz

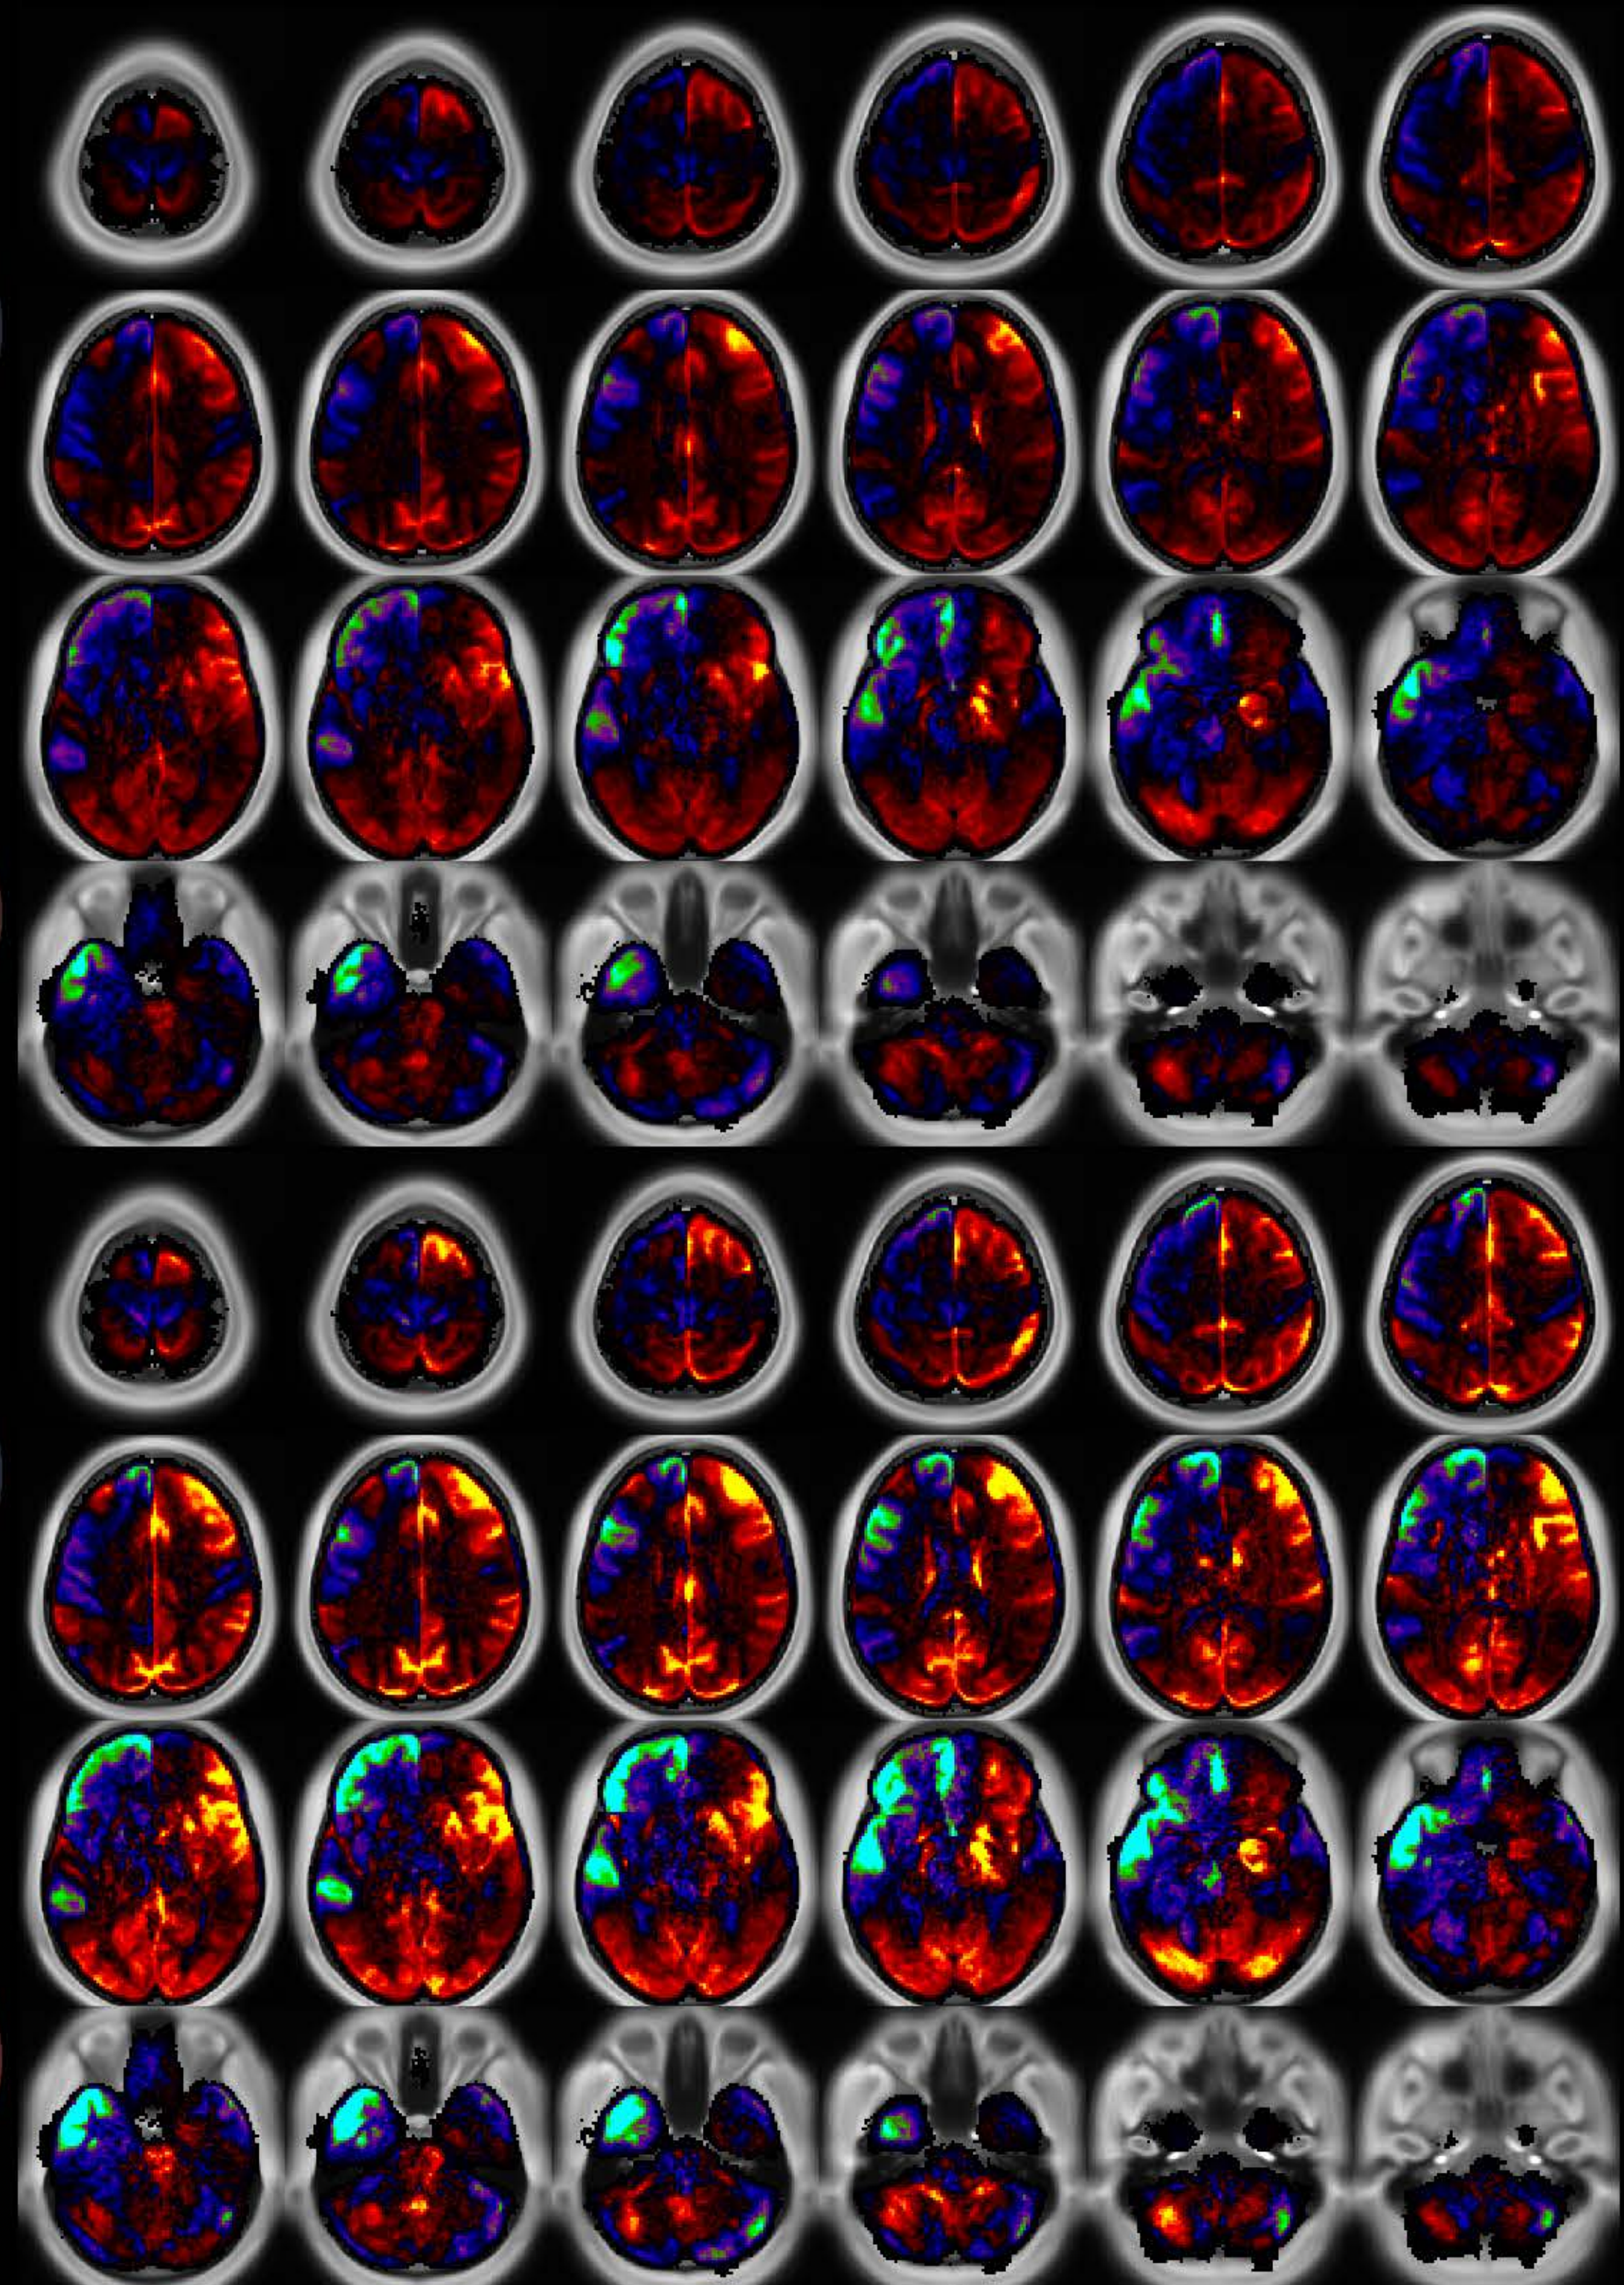

Seconds

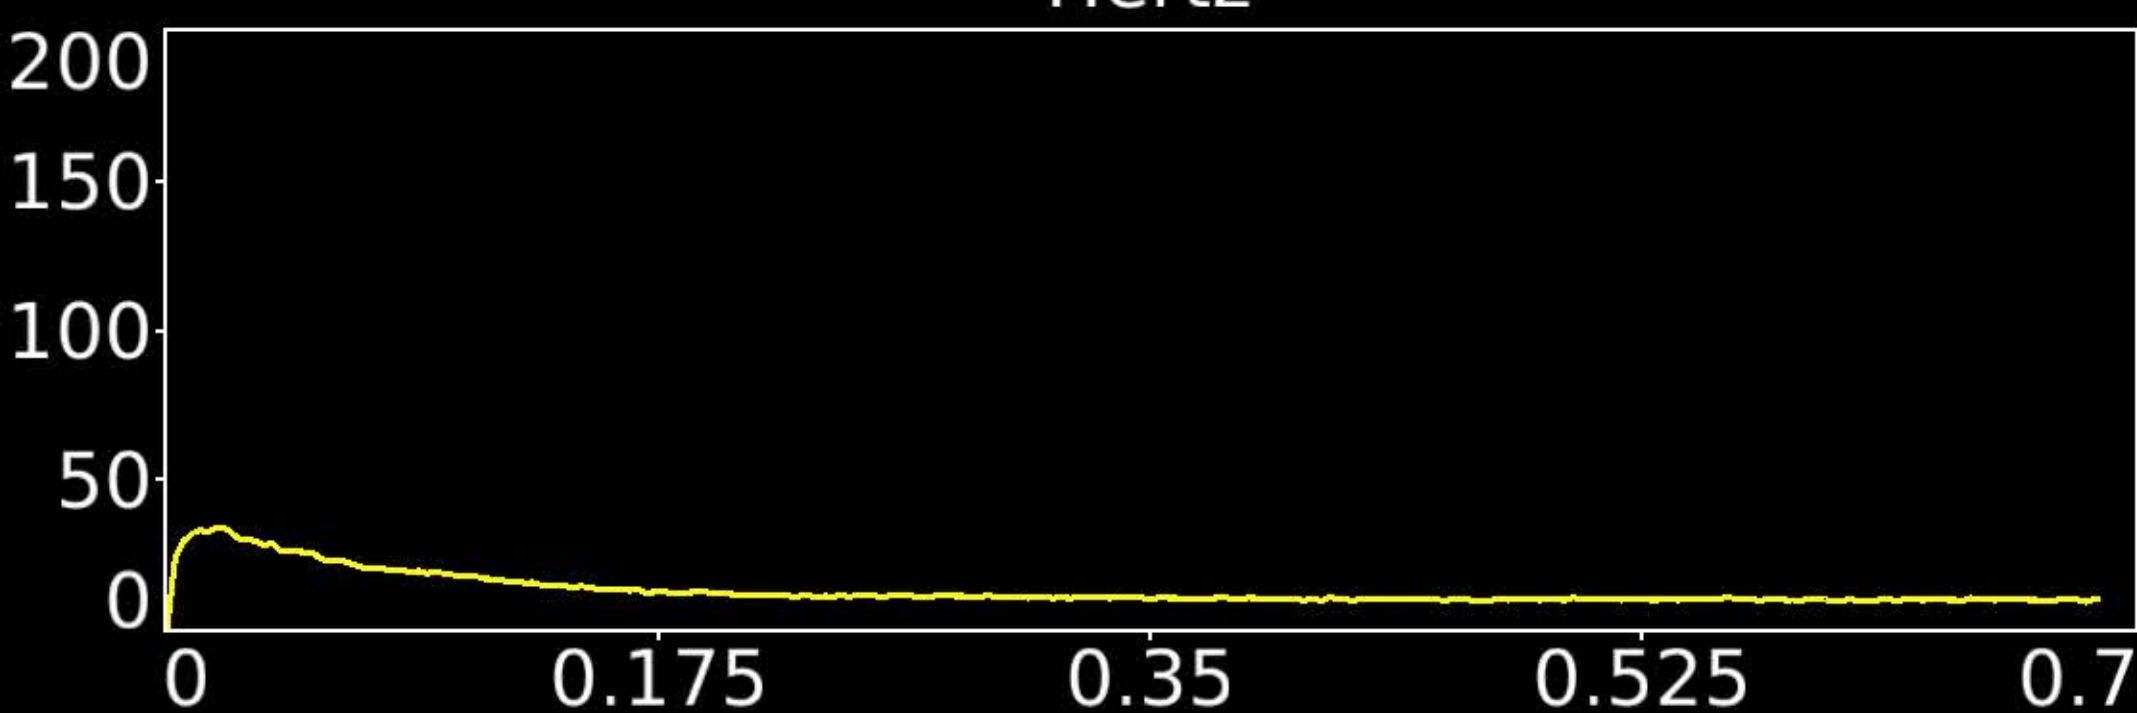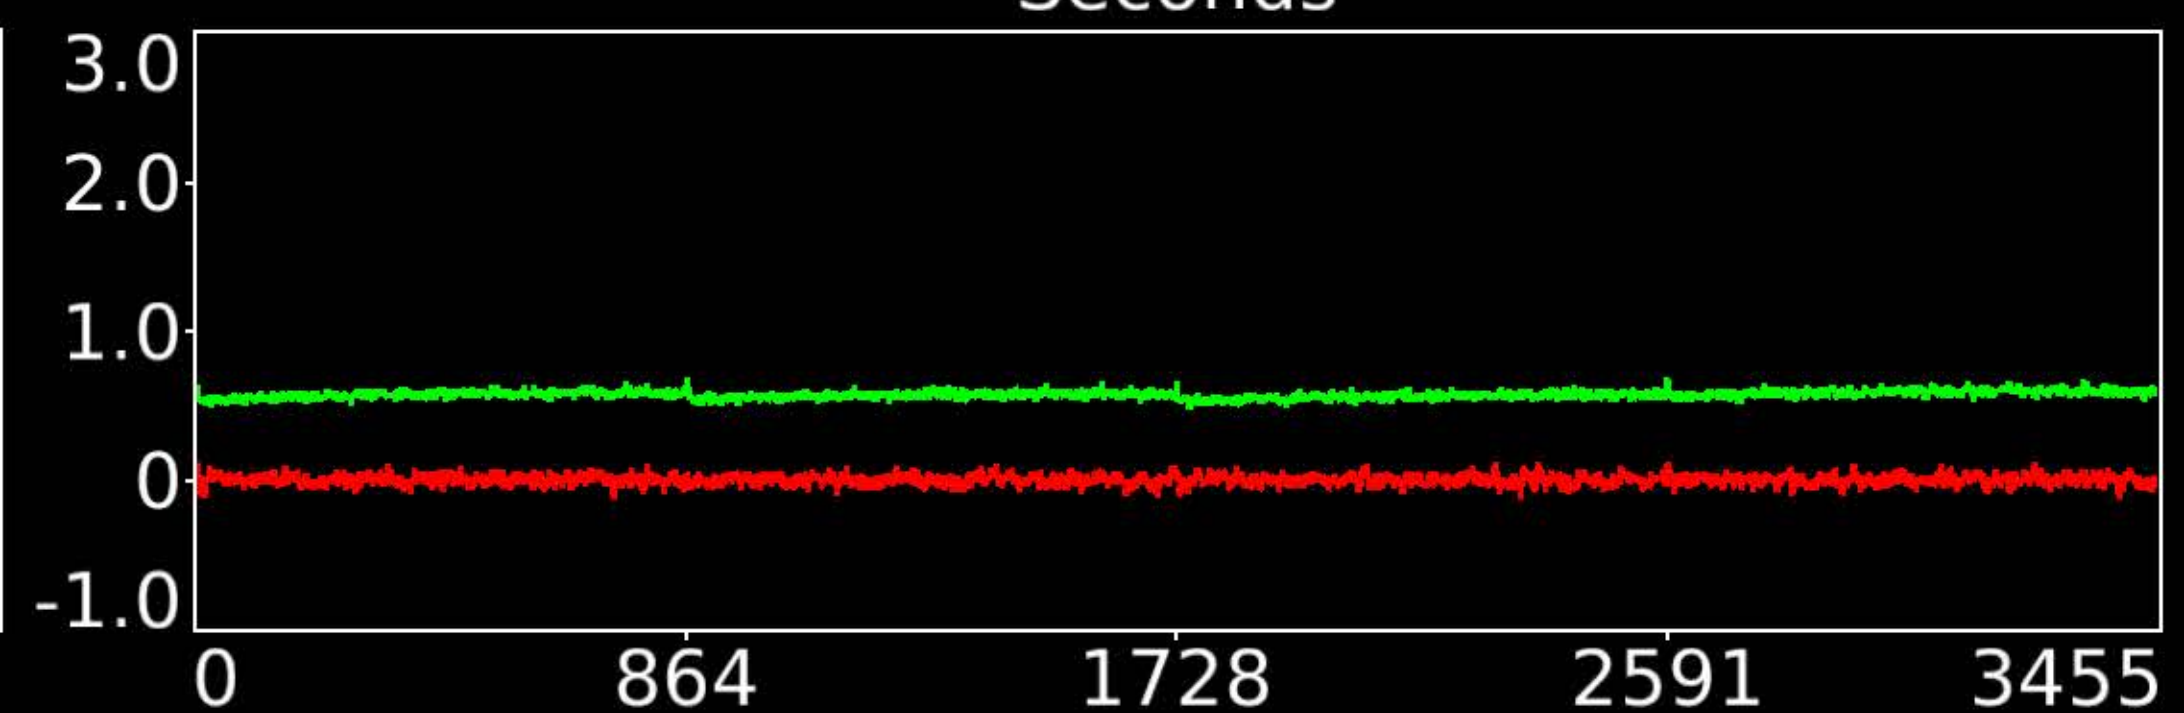

|                                                                                                                  |                           |                            |  |
|------------------------------------------------------------------------------------------------------------------|---------------------------|----------------------------|--|
| Number & Class: 73 Noise                                                                                         |                           | Name: Coil?                |  |
| RVT Correlated: No                                                                                               | DVARS Dip Associated: Yes | Cross-Subject Variable: No |  |
| Single Subject: Yes                                                                                              | % Variance Explained: 0.5 | Globality Index: 0.66      |  |
| Task Component: No                                                                                               | Taskr Component: No       | Sleep Noted: No            |  |
| Rationale: Single subject component with correlation to DVARS dips; potentially coil related or movement related |                           |                            |  |



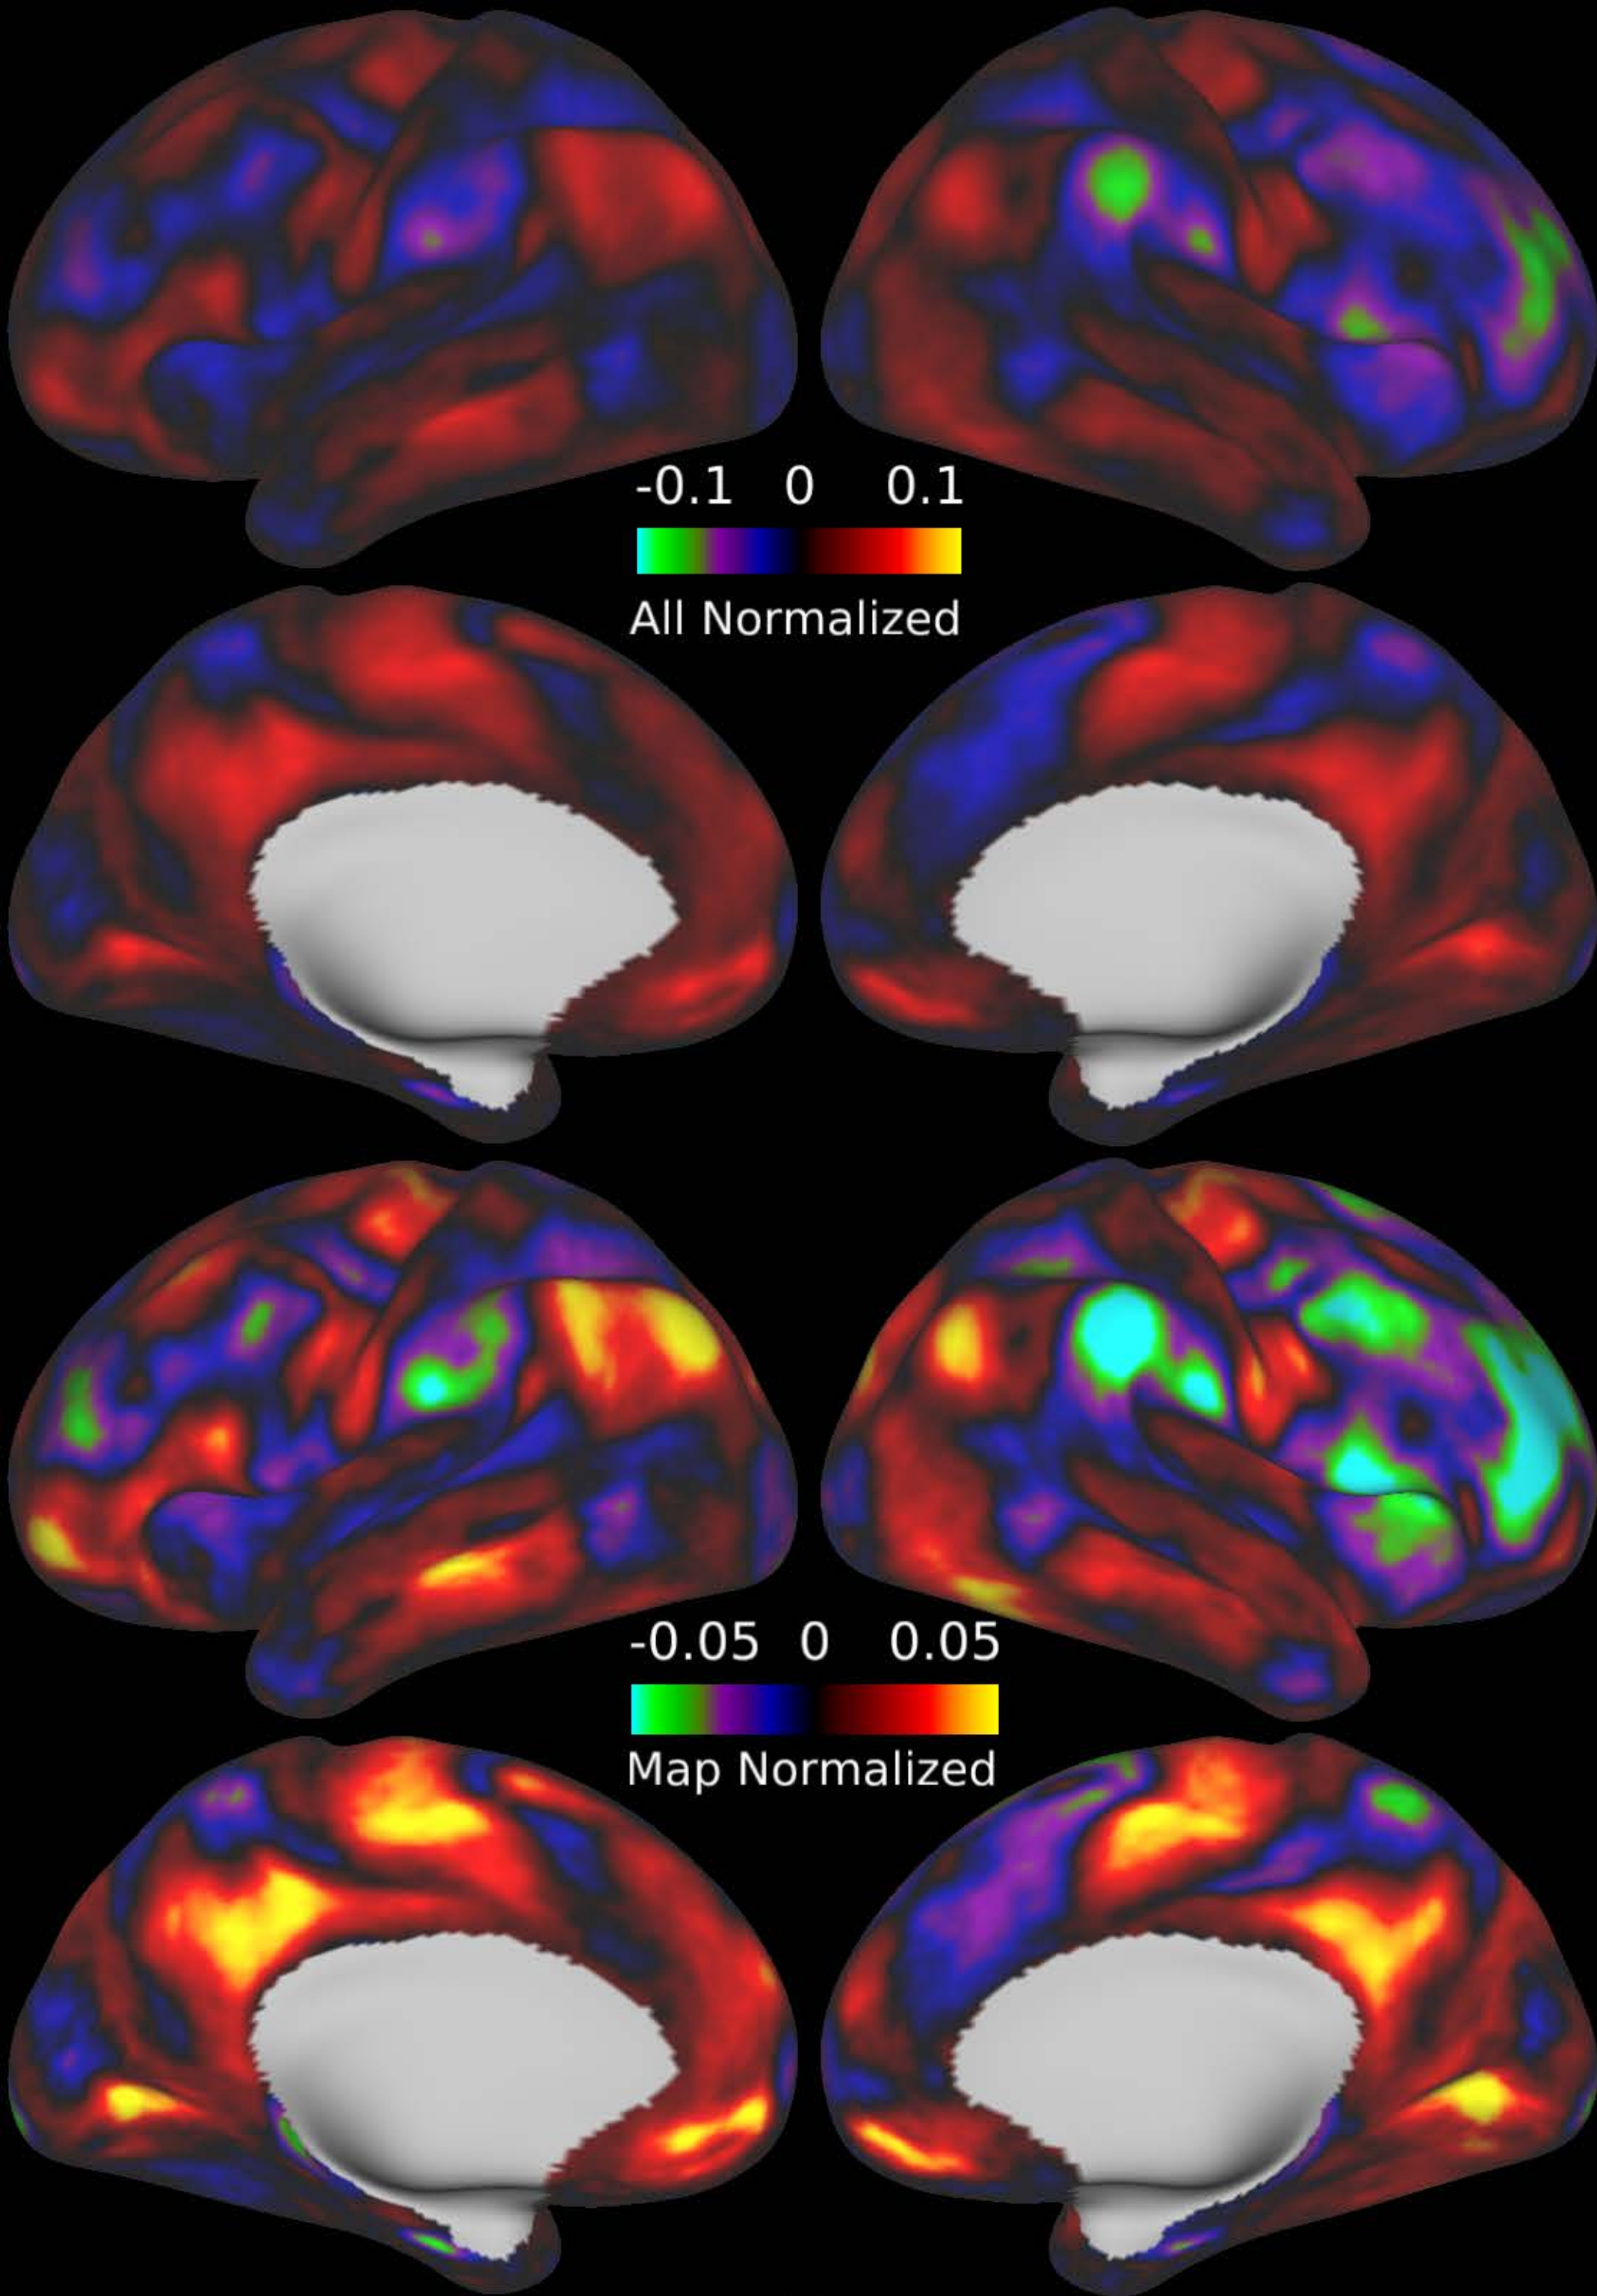

Hertz

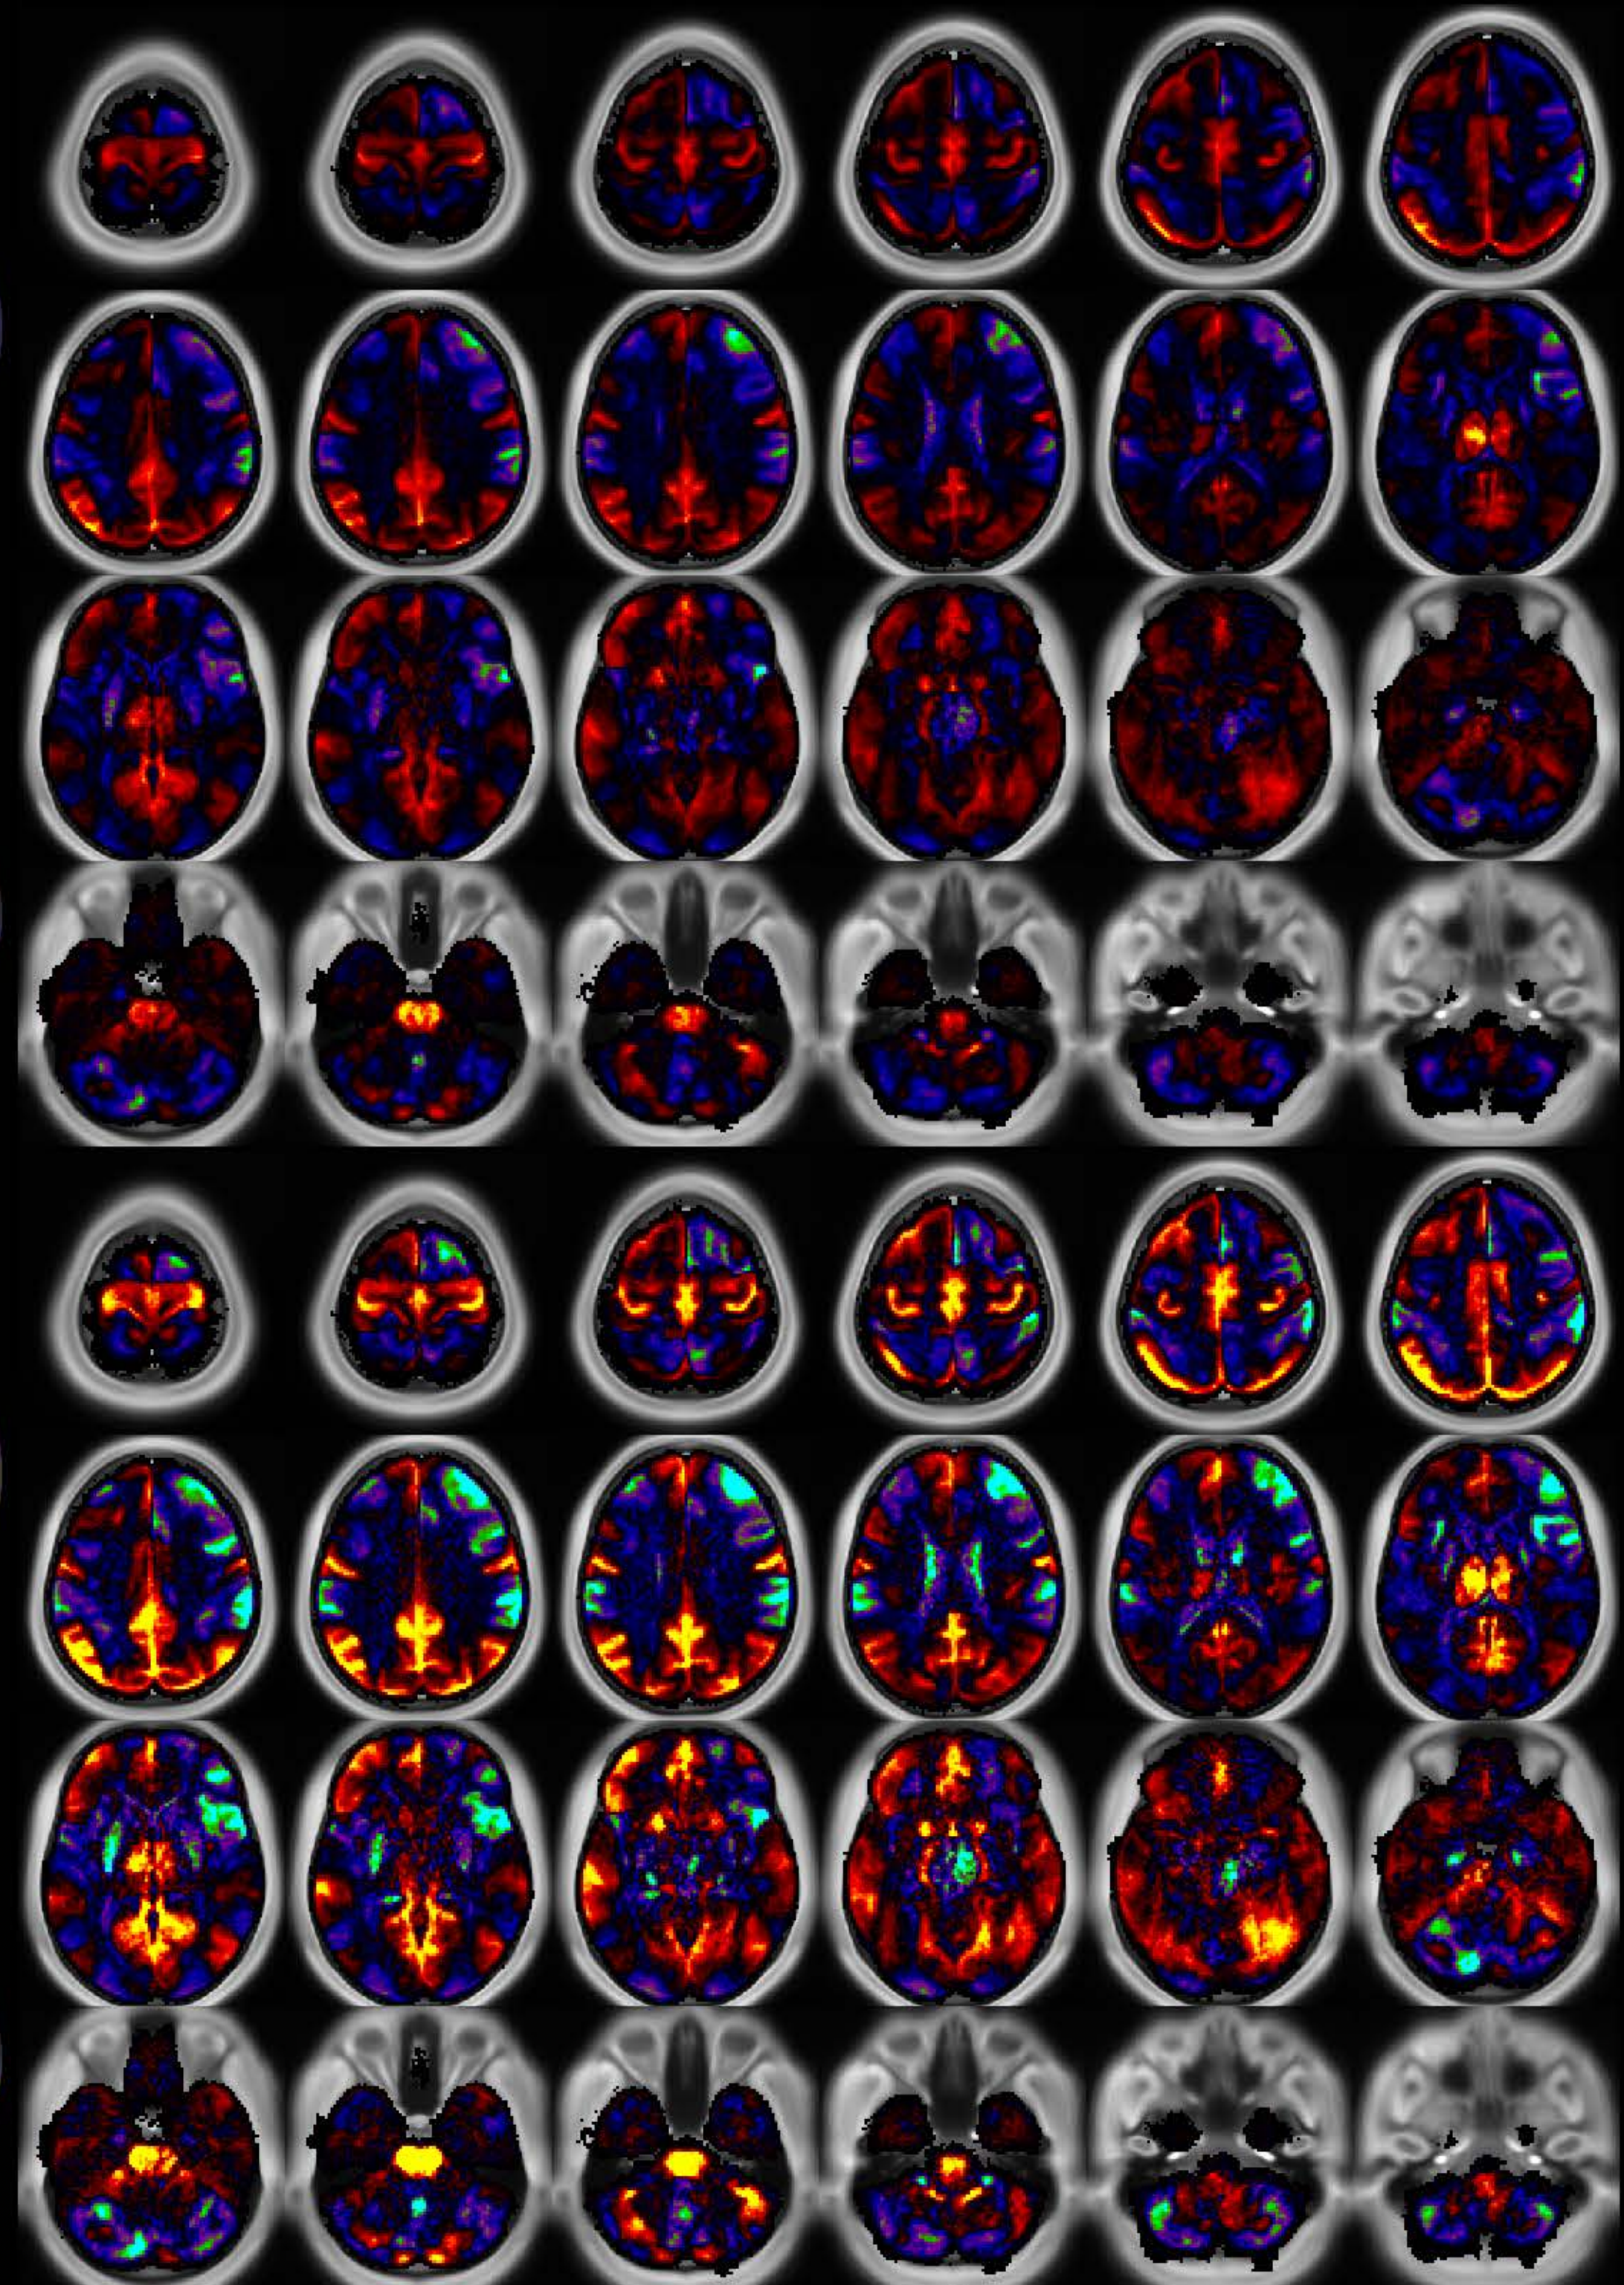

Seconds

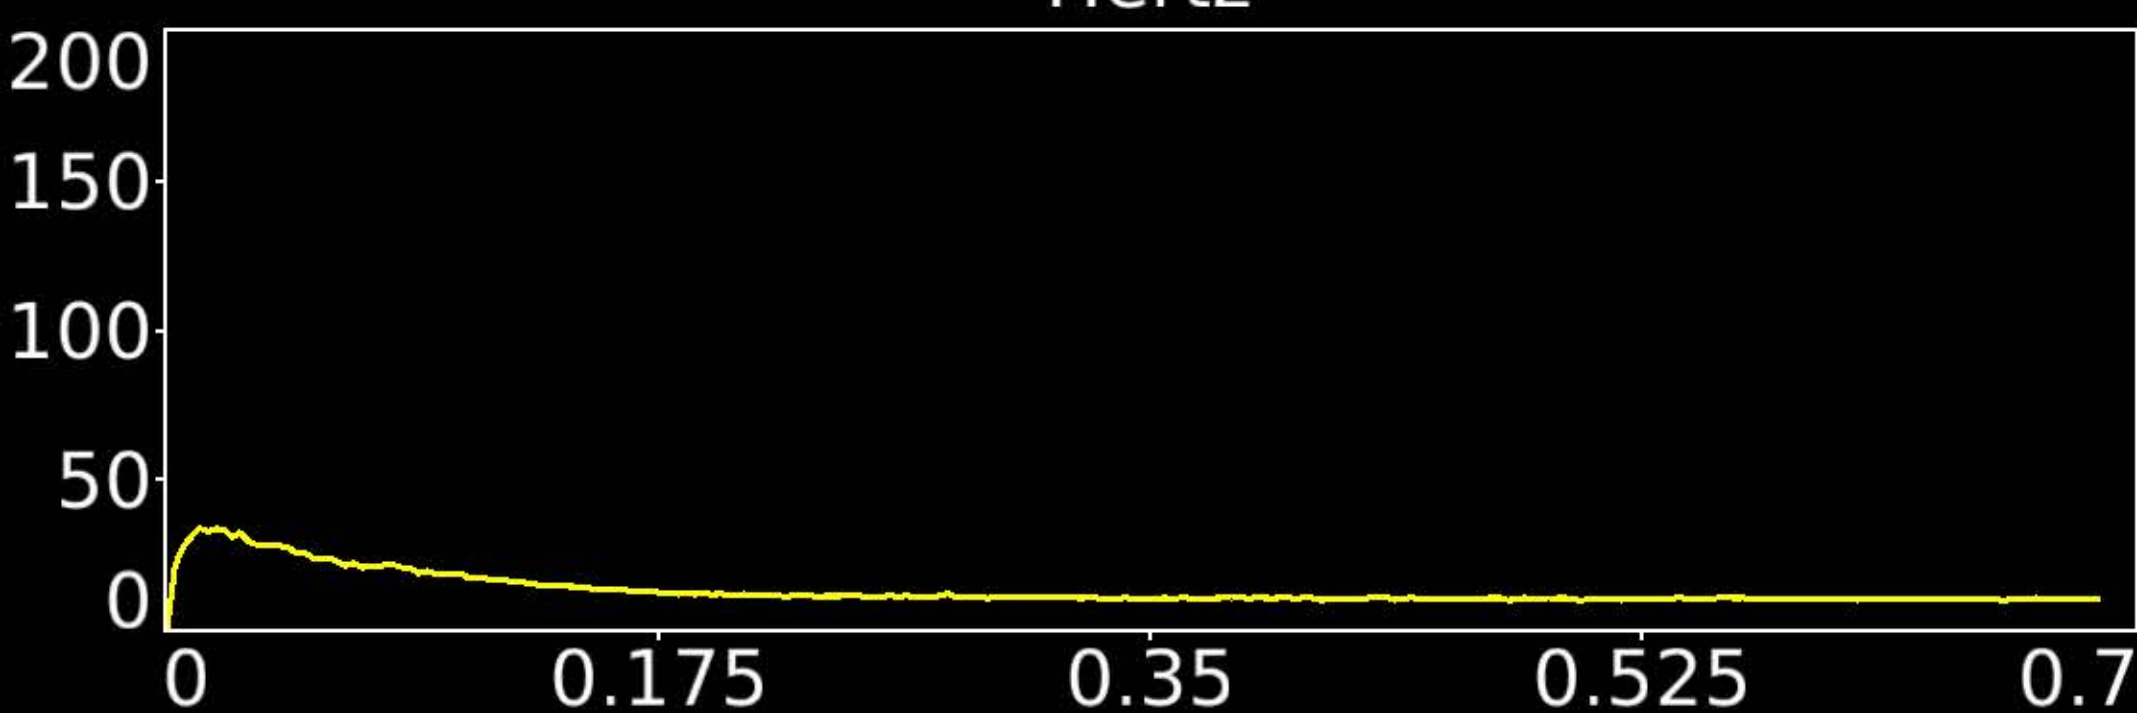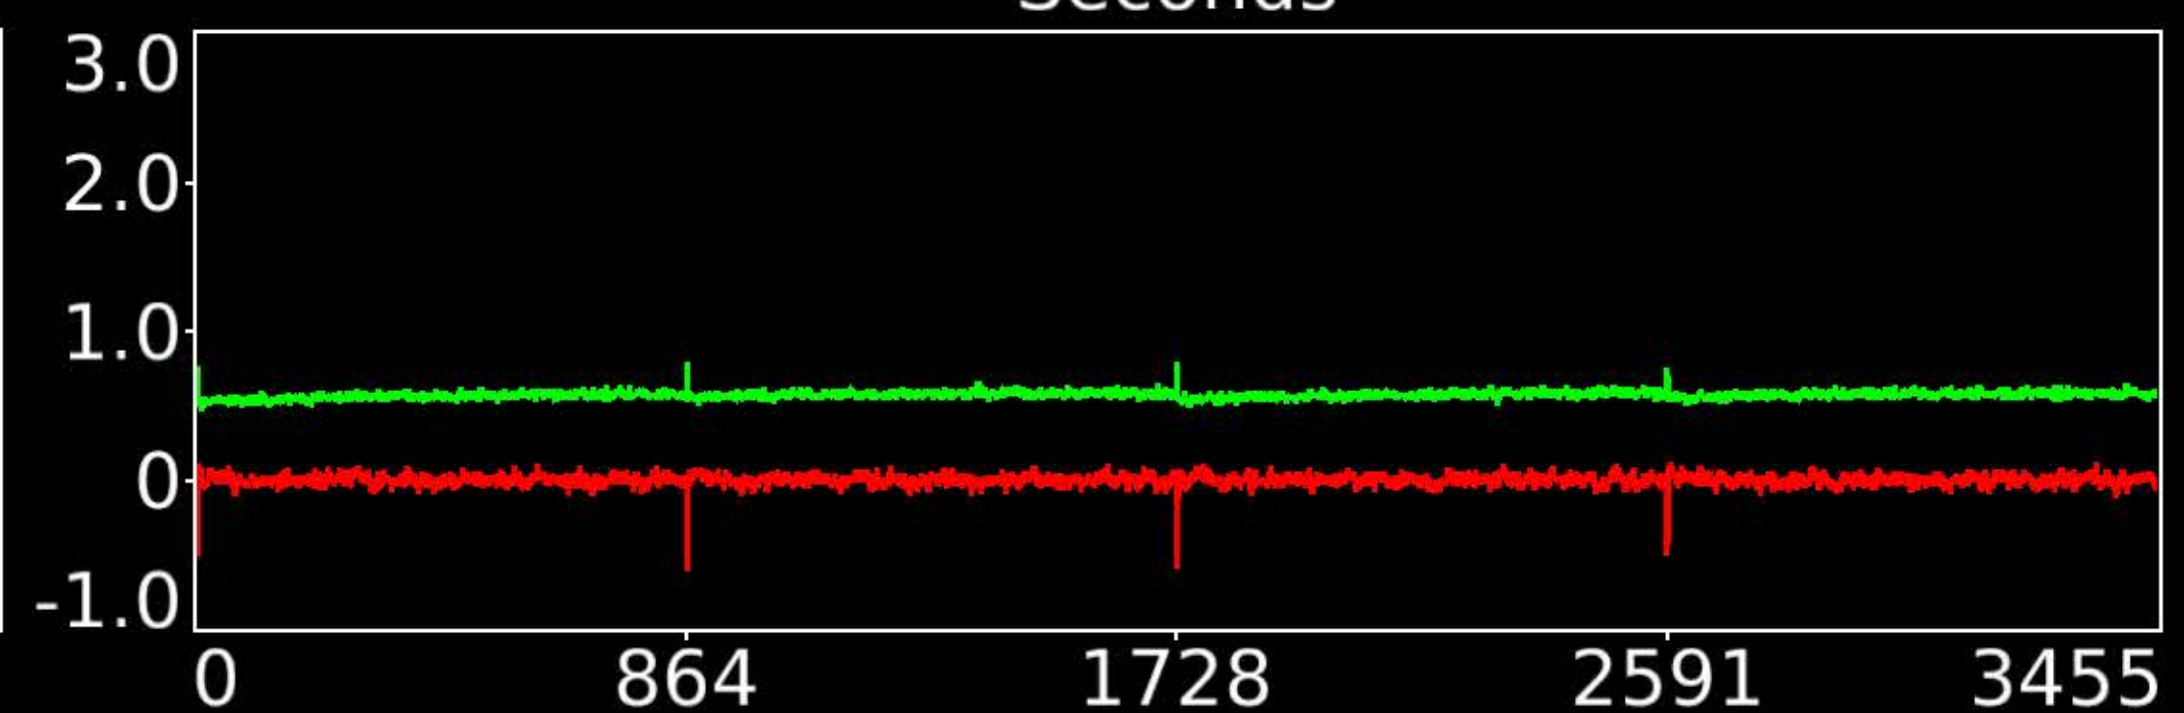

|                           |                           |                             |  |
|---------------------------|---------------------------|-----------------------------|--|
| Number & Class: 74 Signal |                           | Name: Single Subject Signal |  |
| RVT Correlated: No        | DVARS Dip Associated: No  | Cross-Subject Variable: No  |  |
| Single Subject: Yes       | % Variance Explained: 0.5 | Globality Index: 0.12       |  |
| Task Component: No        | Taskr Component: No       | Sleep Noted: No             |  |

Rationale: Controversial: Single Subject Component with spatial map that includes positive and negative patches that respect known RSNs (e.g. Default Mode Network)



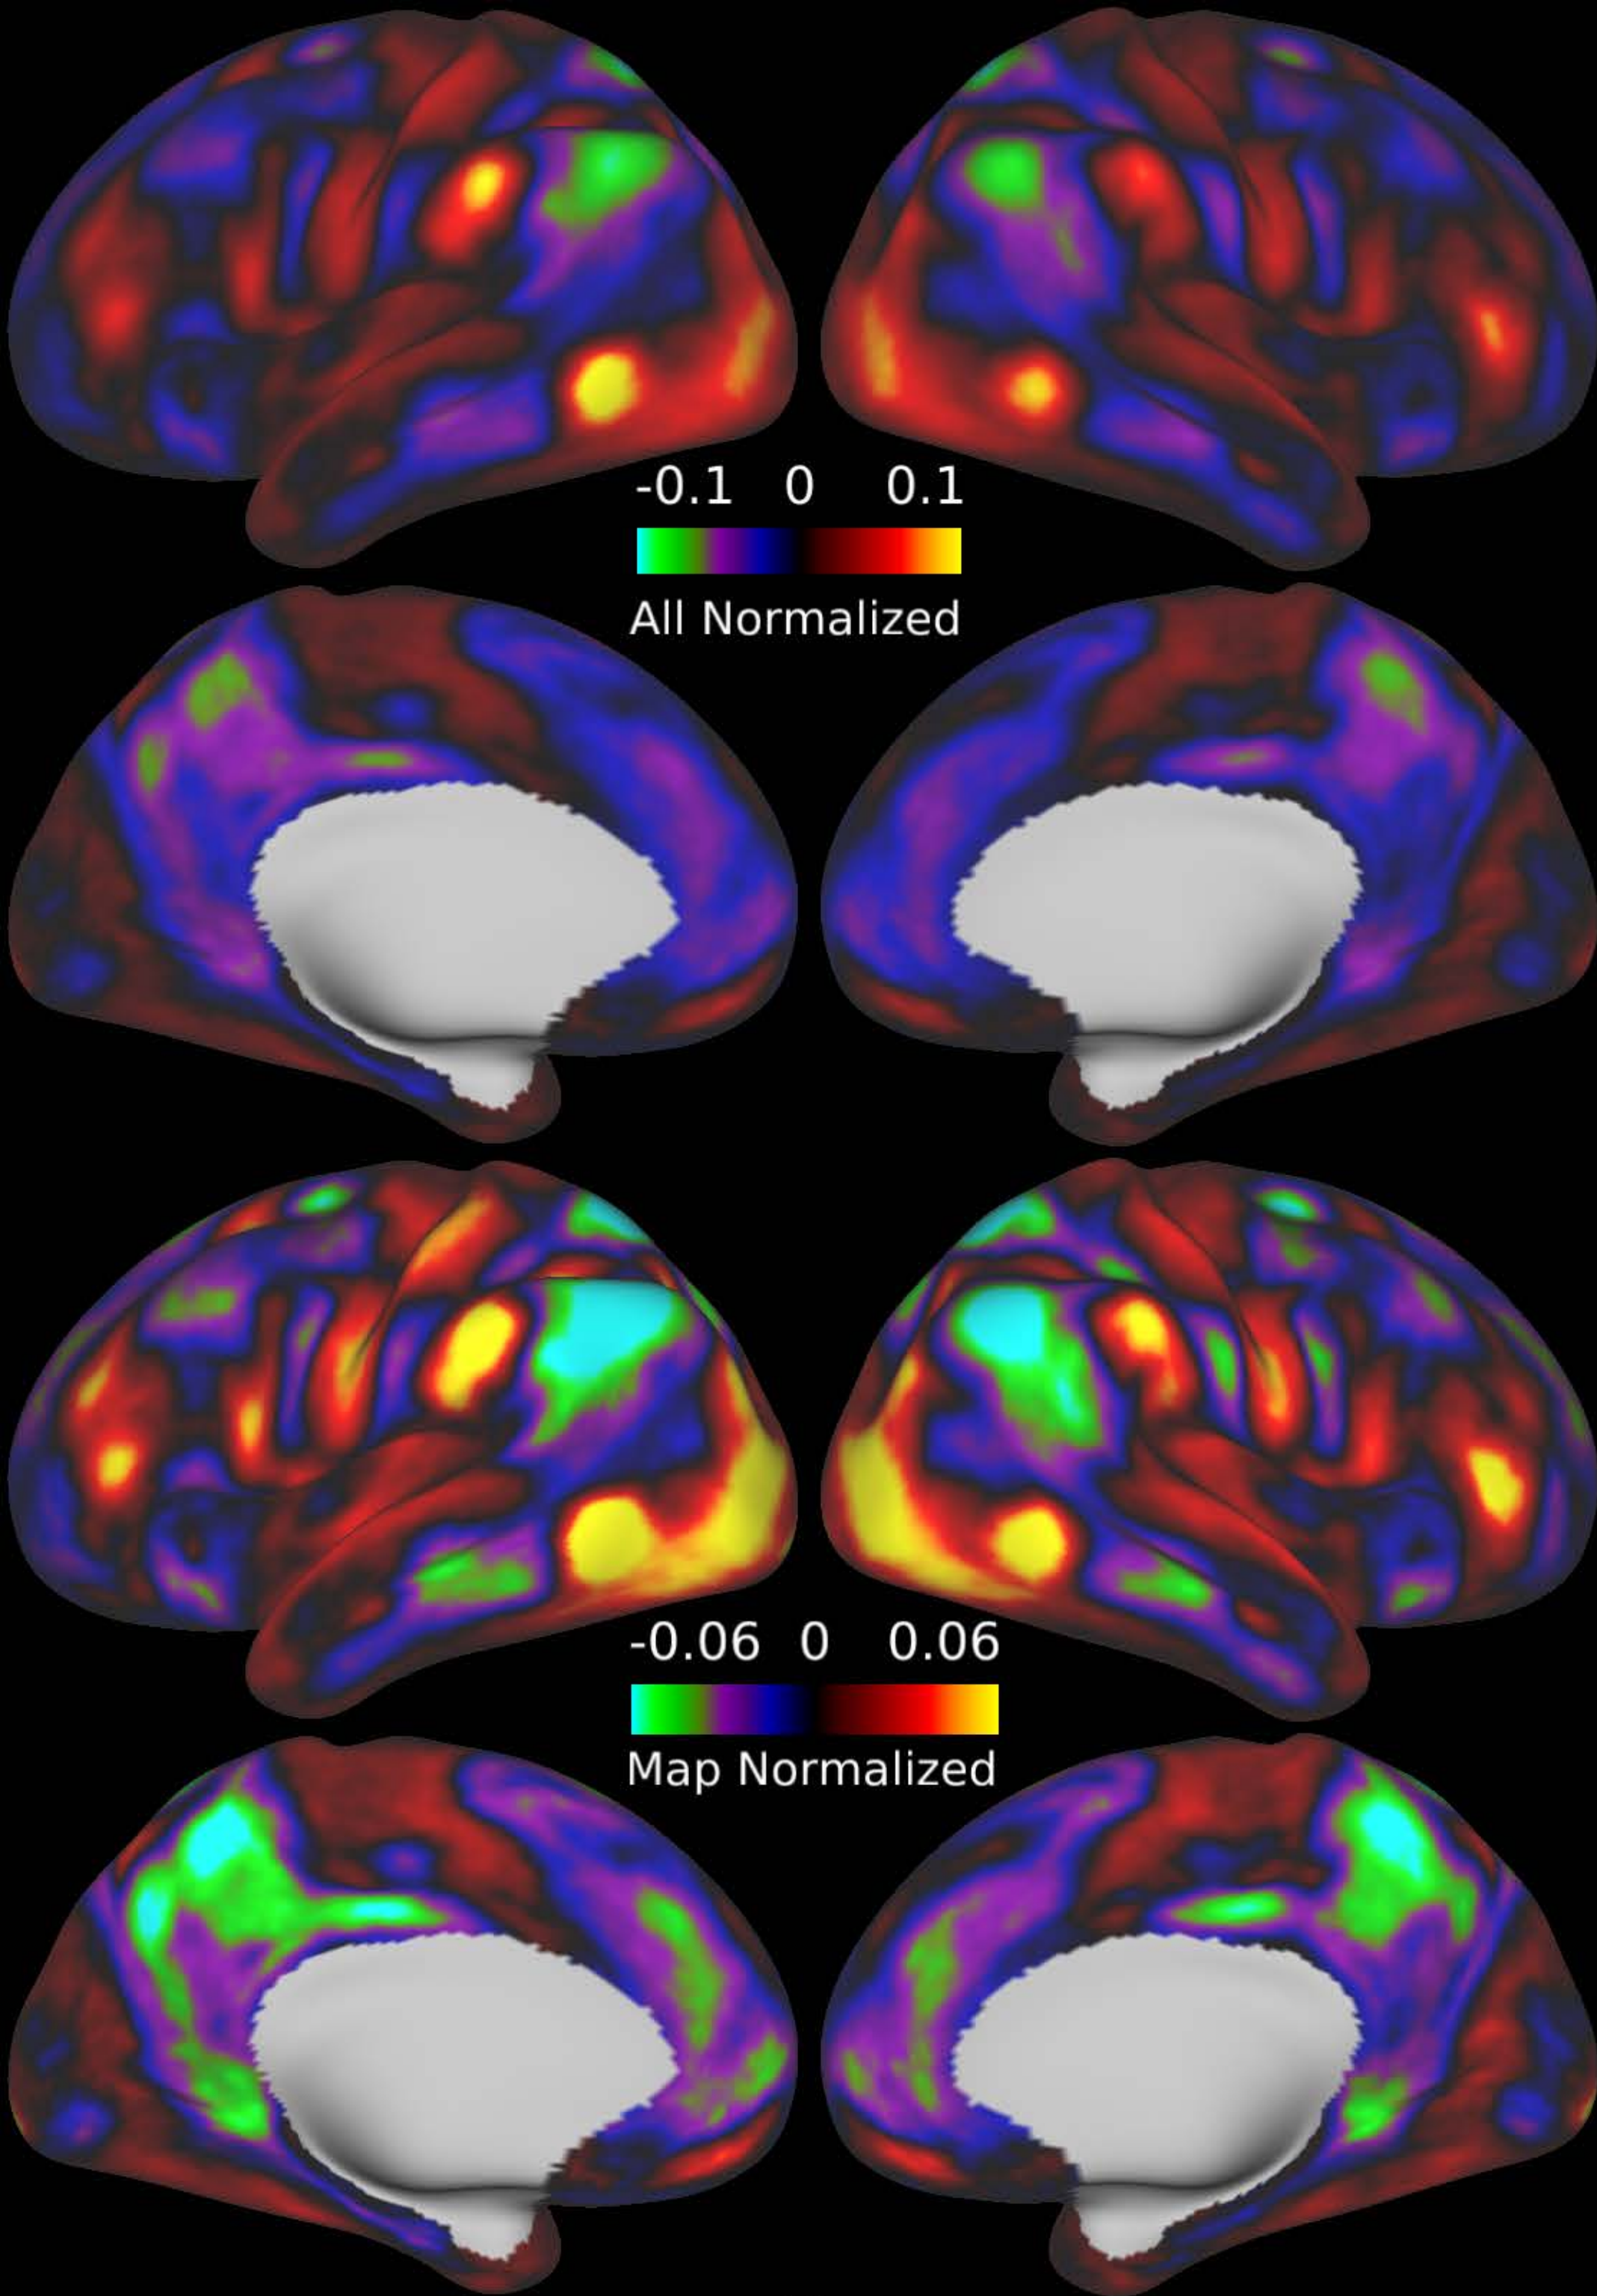

Hertz

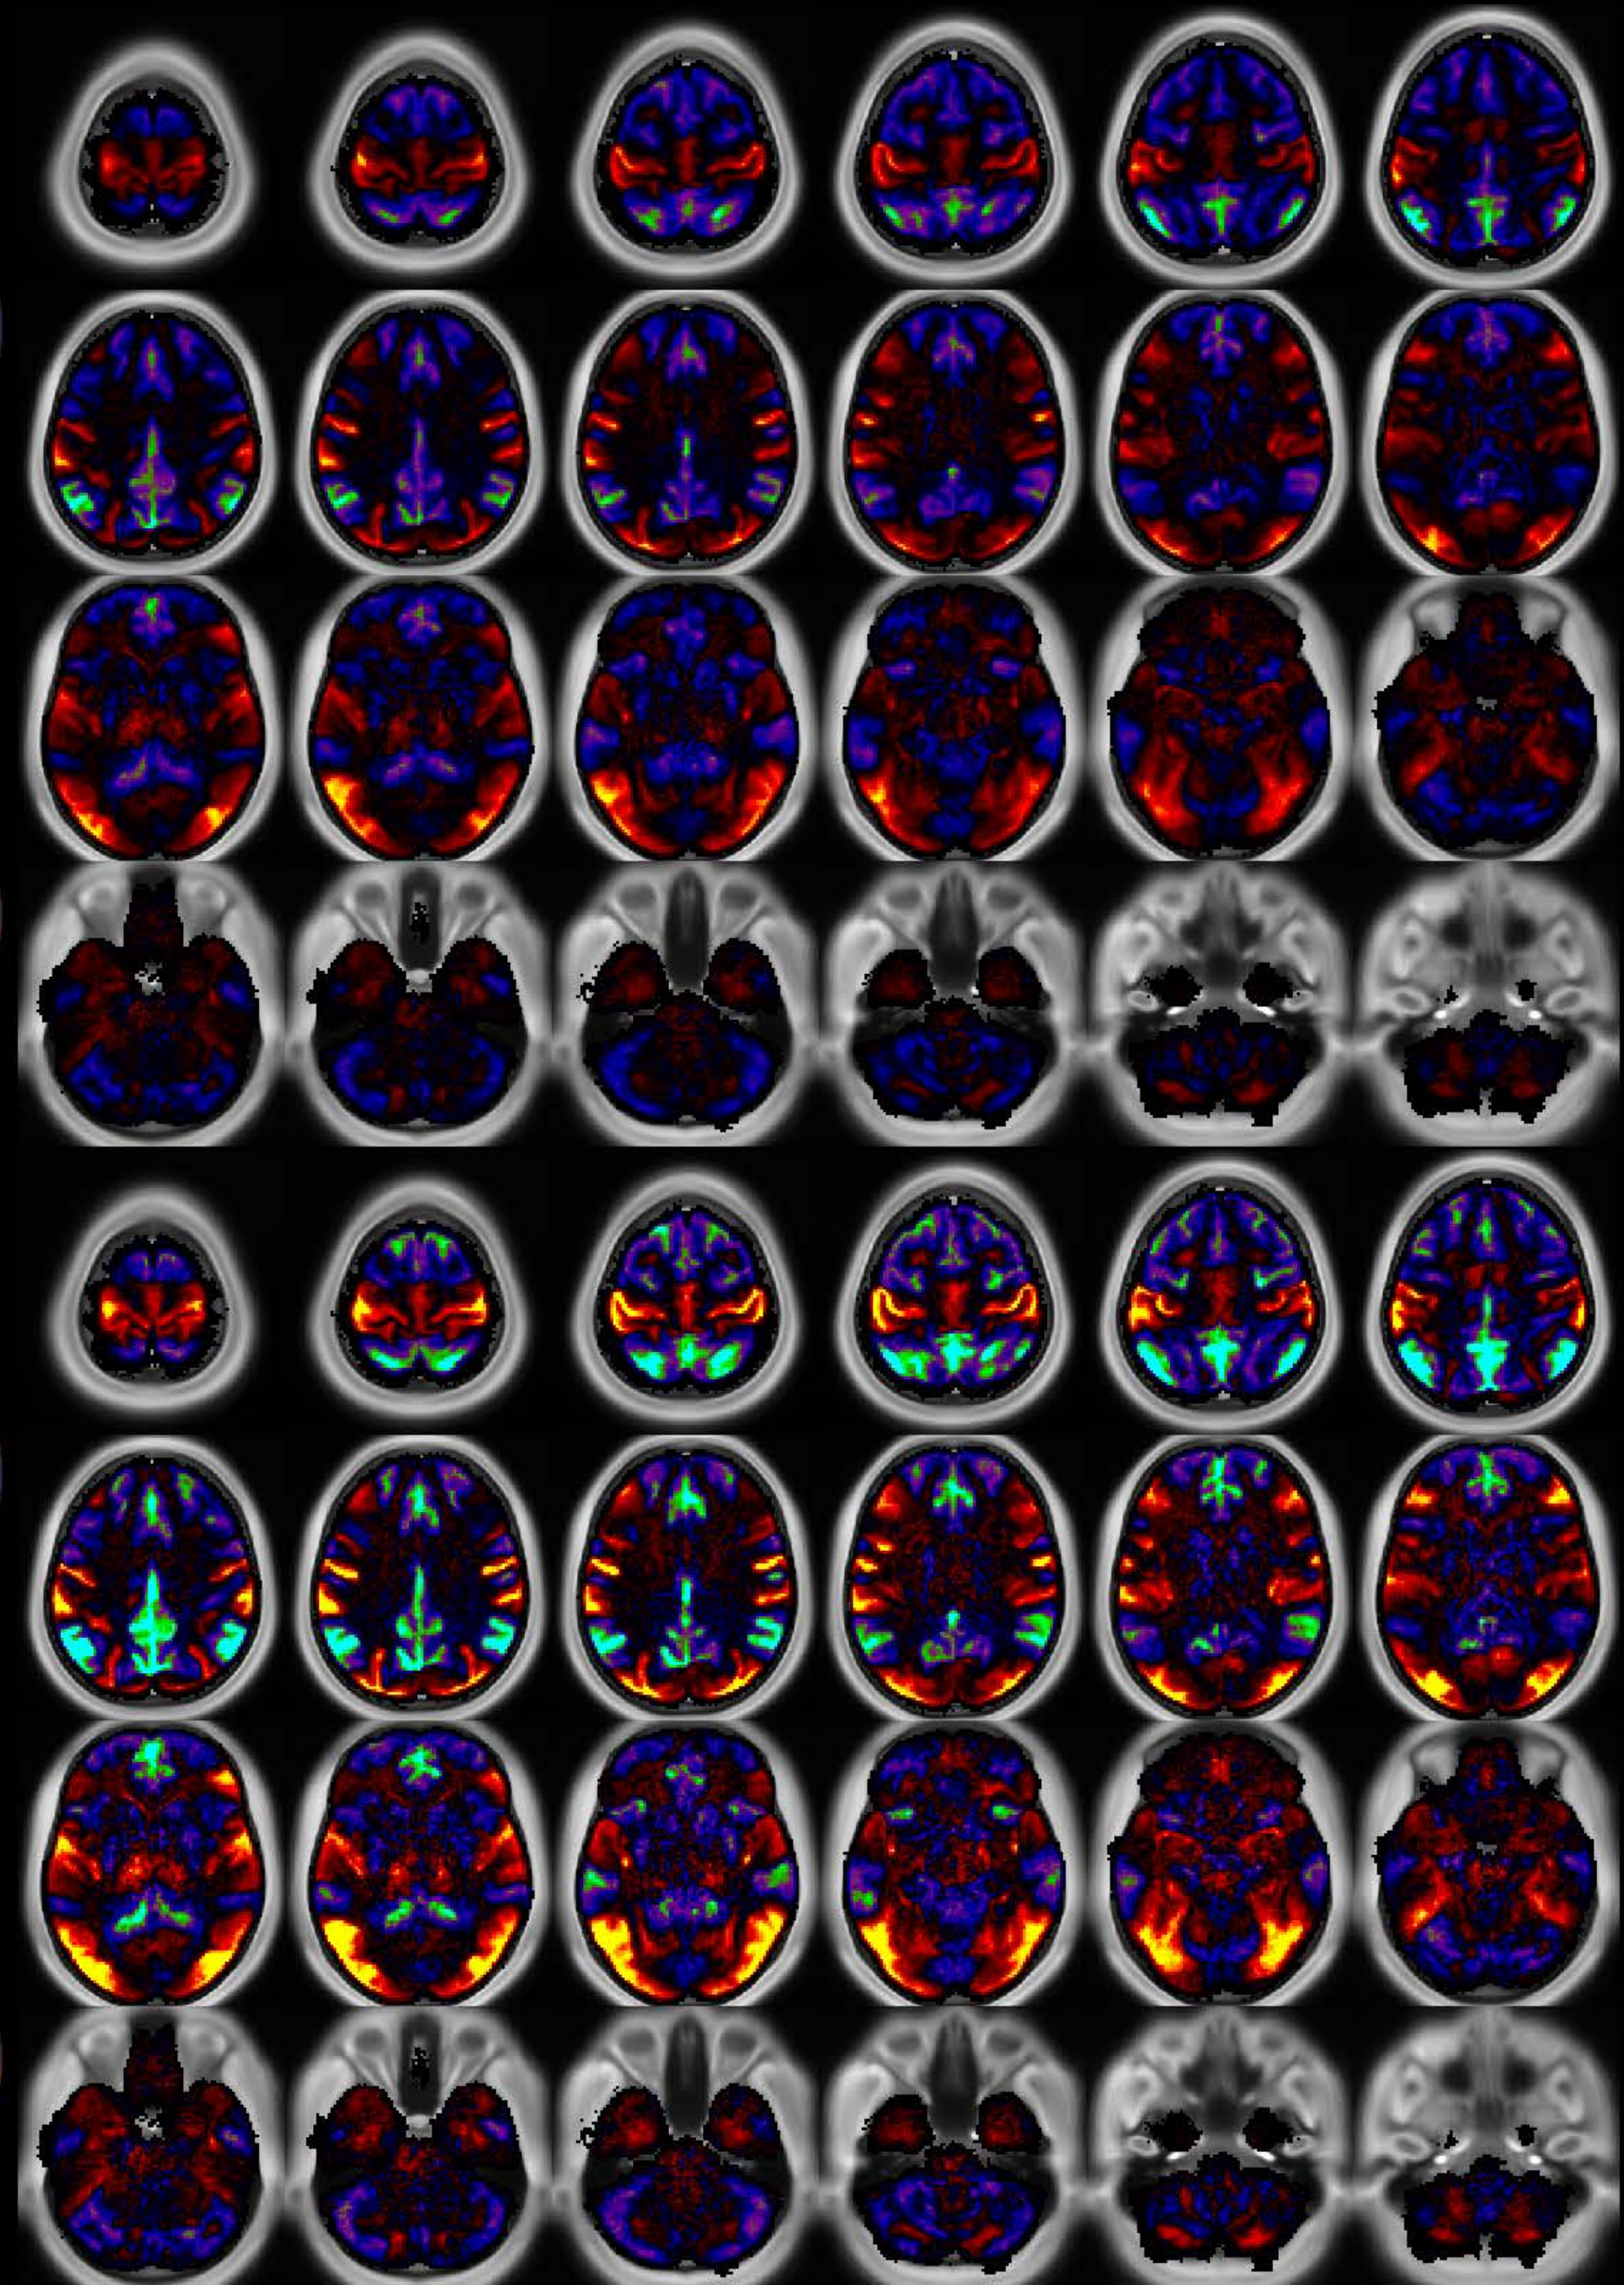

Seconds

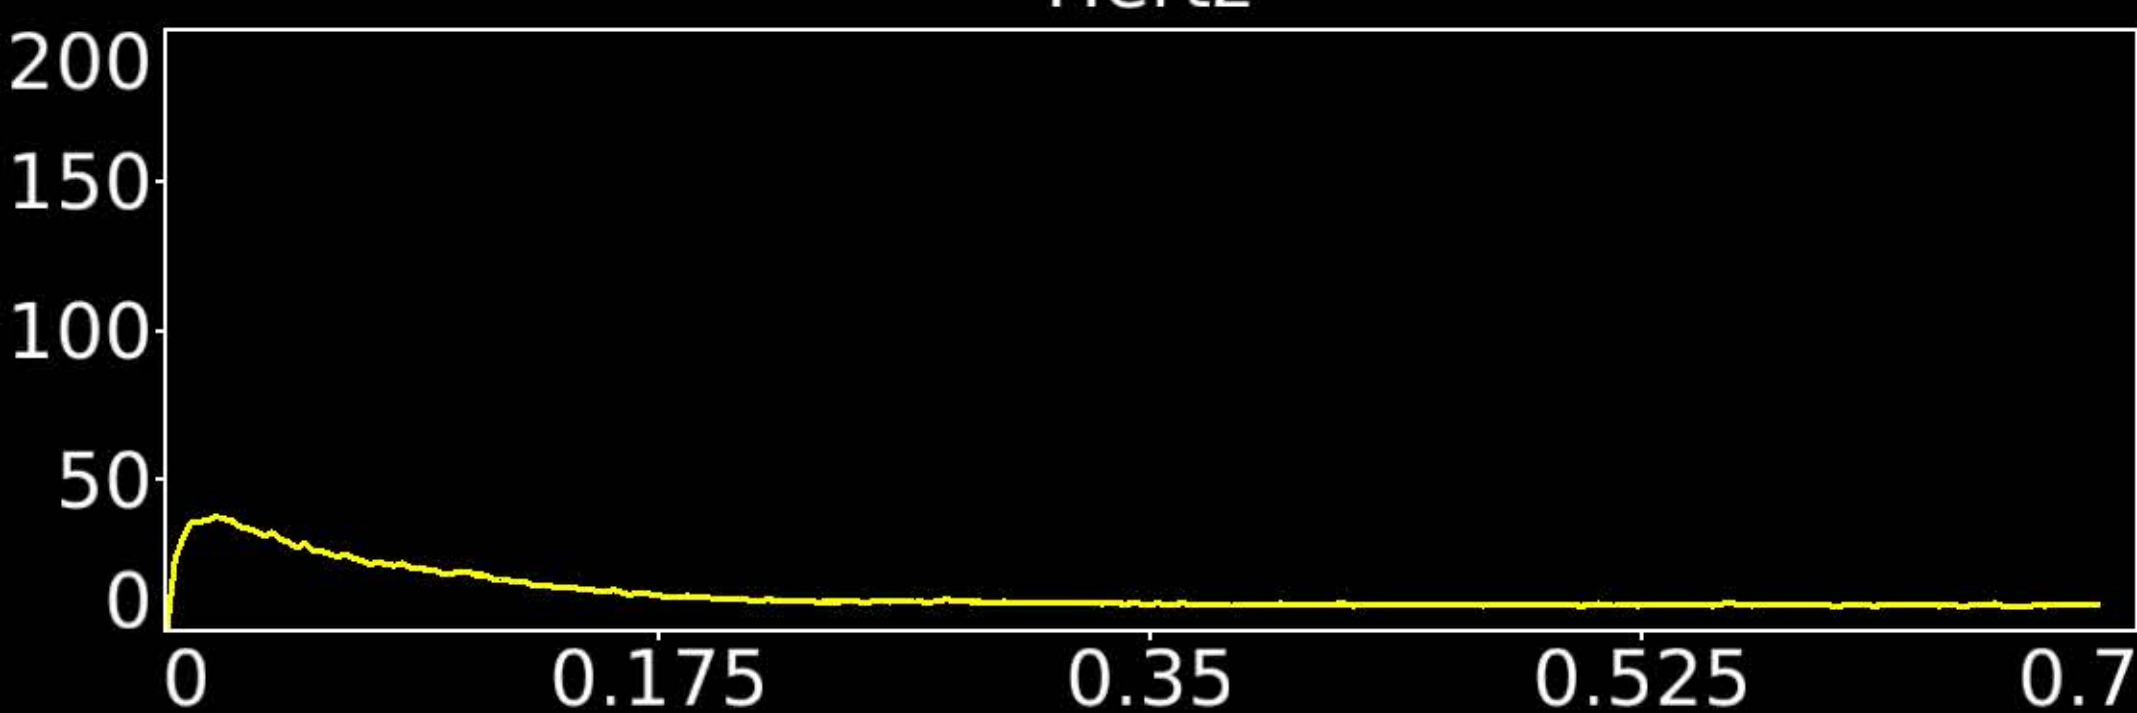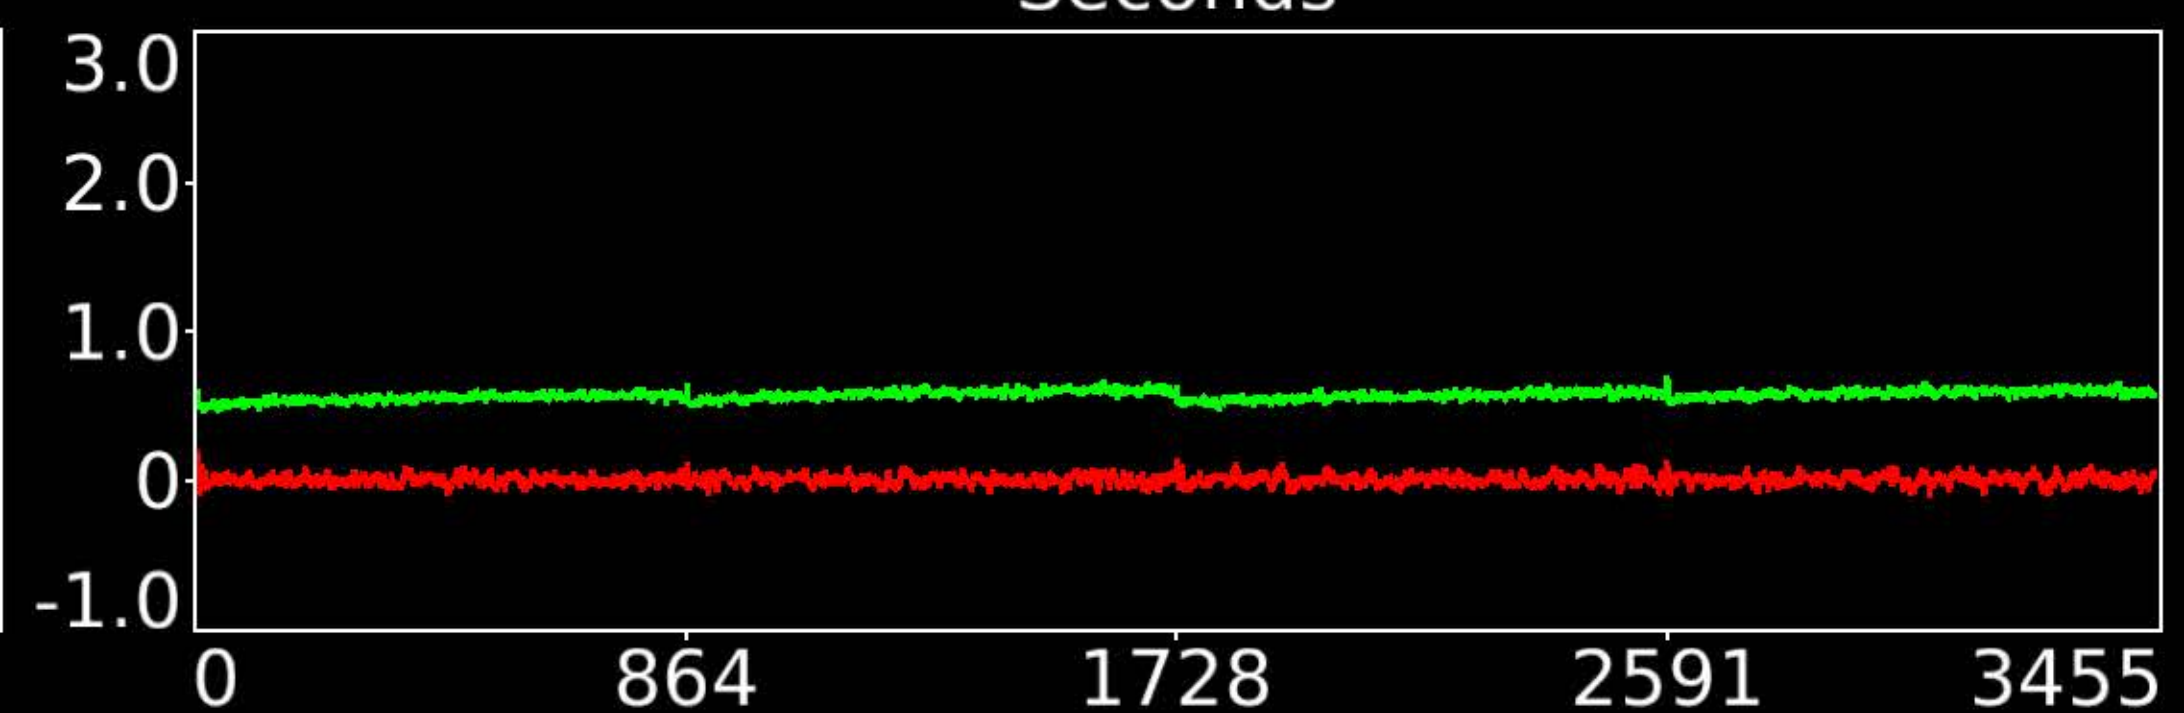

|                           |                           |                            |  |
|---------------------------|---------------------------|----------------------------|--|
| Number & Class: 75 Signal |                           | Name: Unknown Network      |  |
| RVT Correlated: No        | DVARS Dip Associated: No  | Cross-Subject Variable: No |  |
| Single Subject: No        | % Variance Explained: 0.5 | Globality Index: 0.18      |  |
| Task Component: No        | Taskr Component: No       | Sleep Noted: No            |  |

Rationale: Spatial map includes positive and negative patches that respect known areal boundaries (e.g. PF and Pfm)



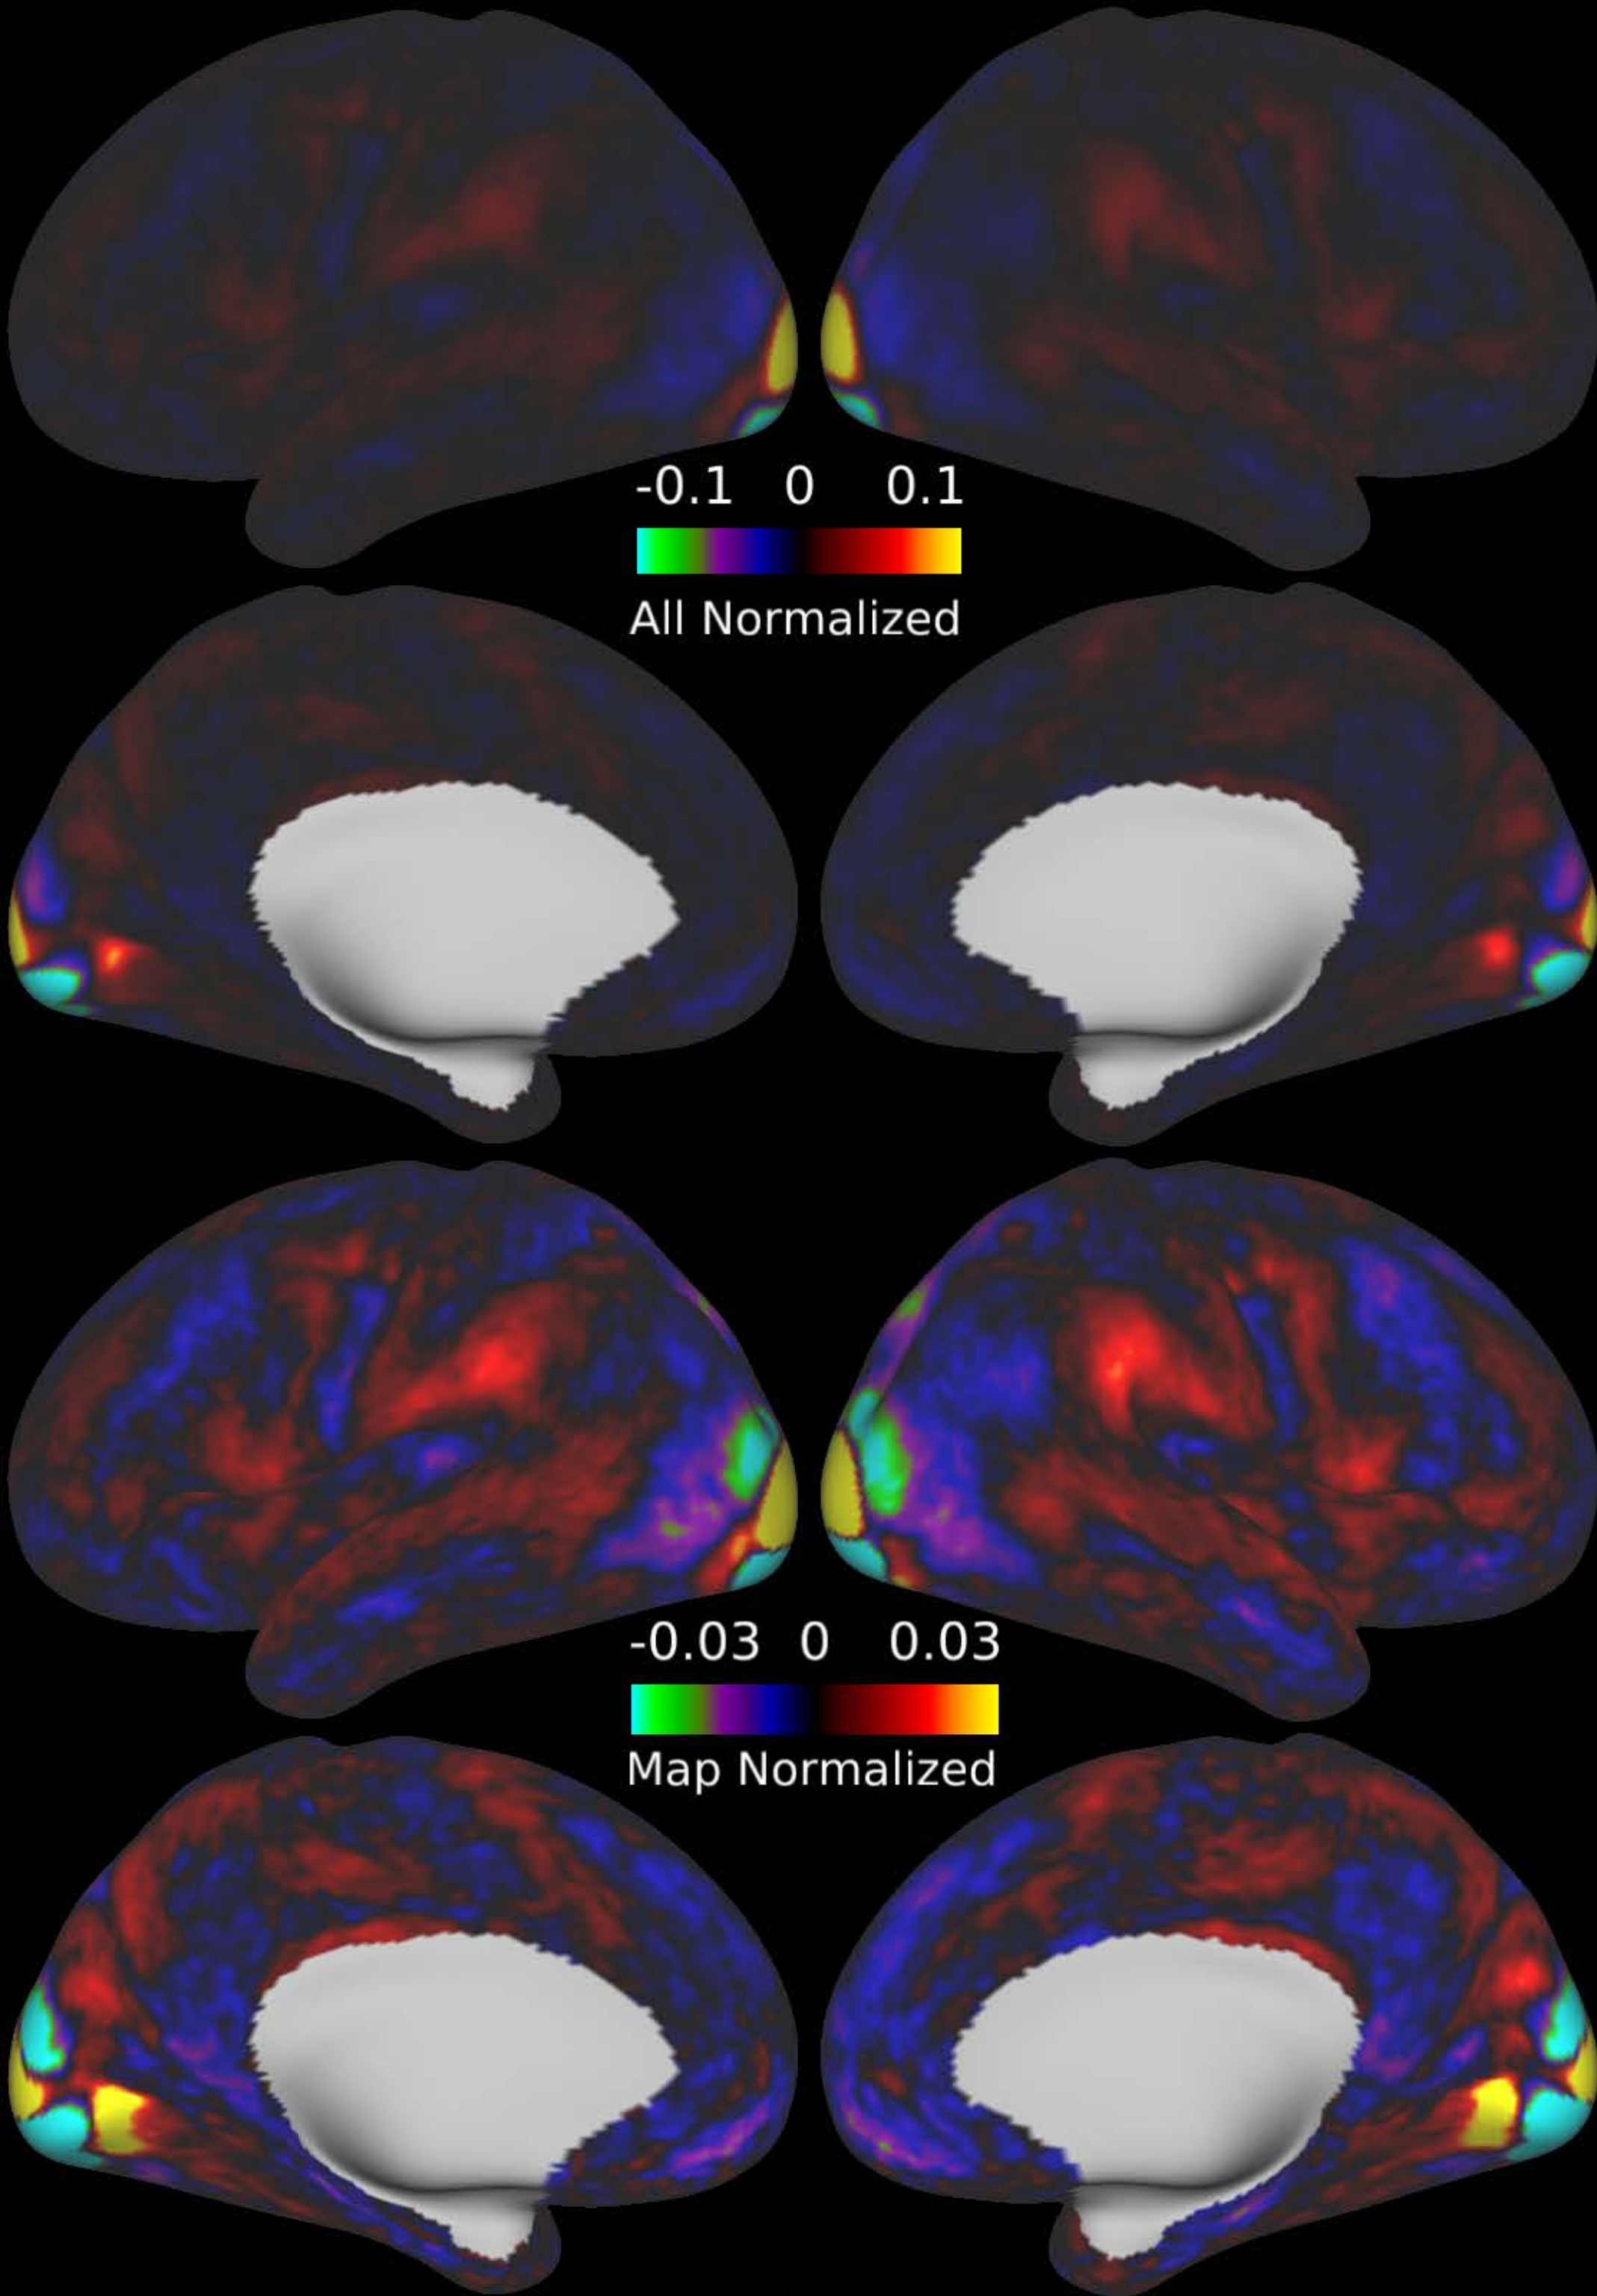

Hertz

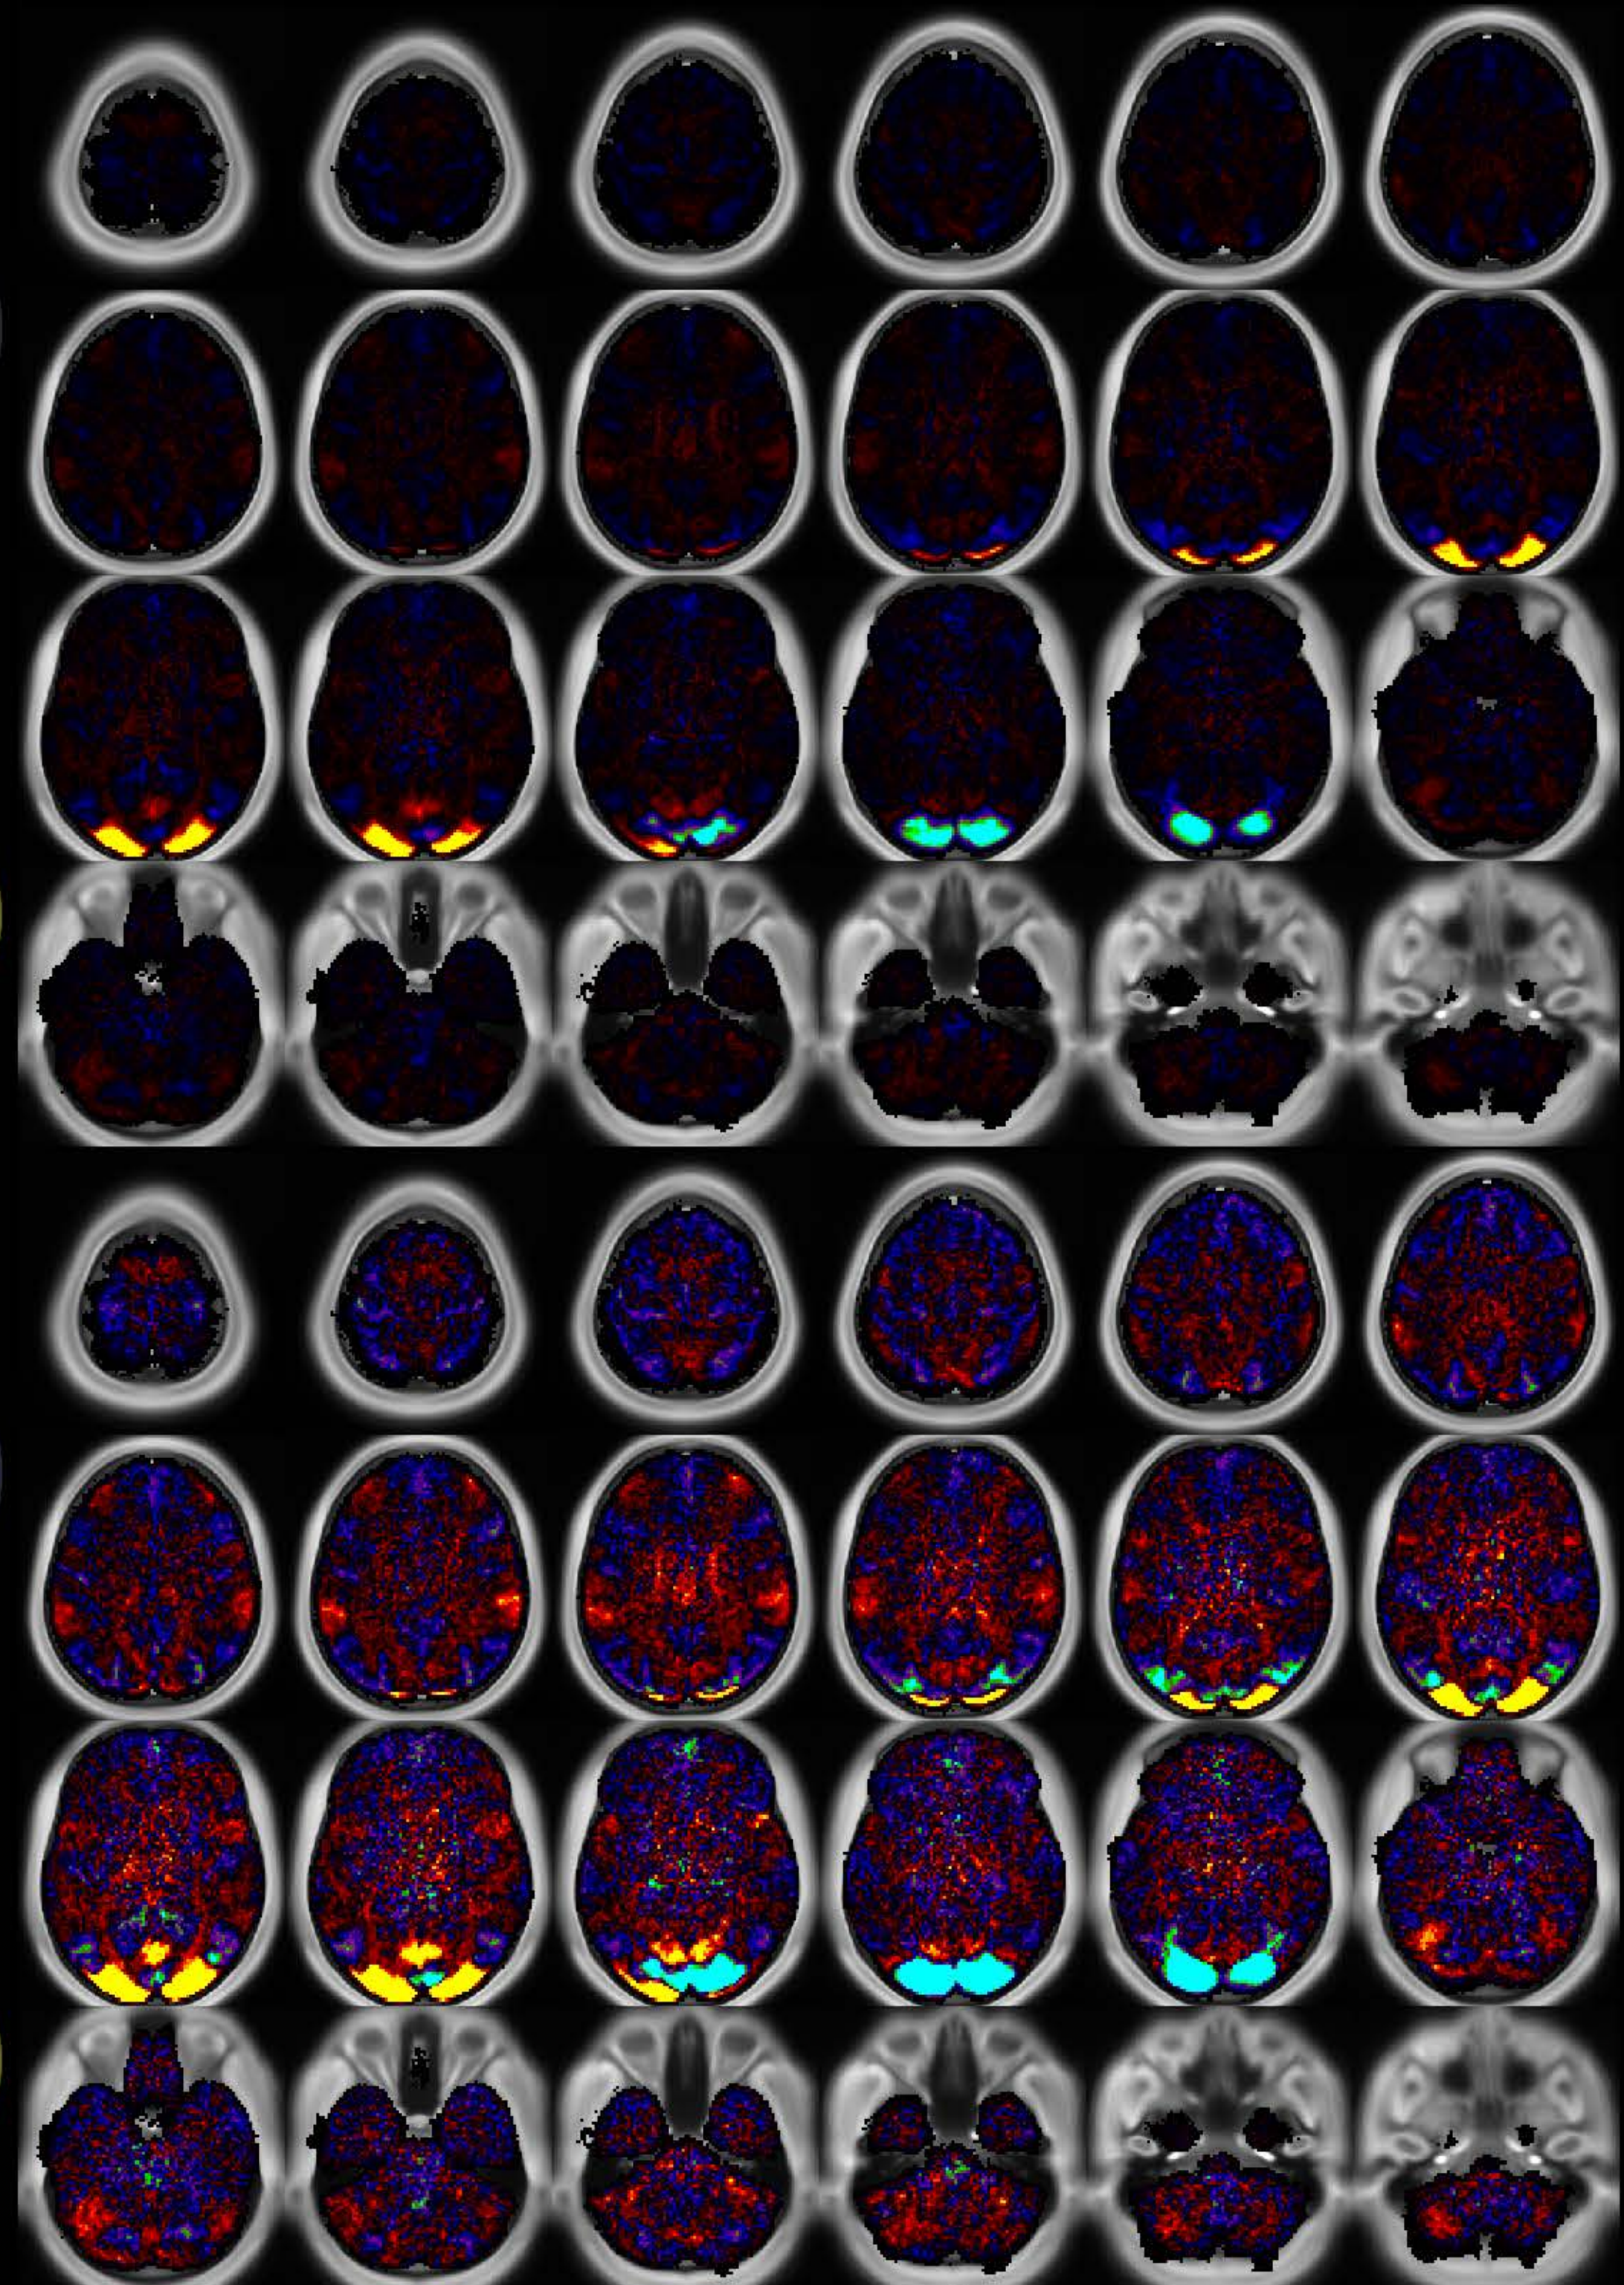

Seconds

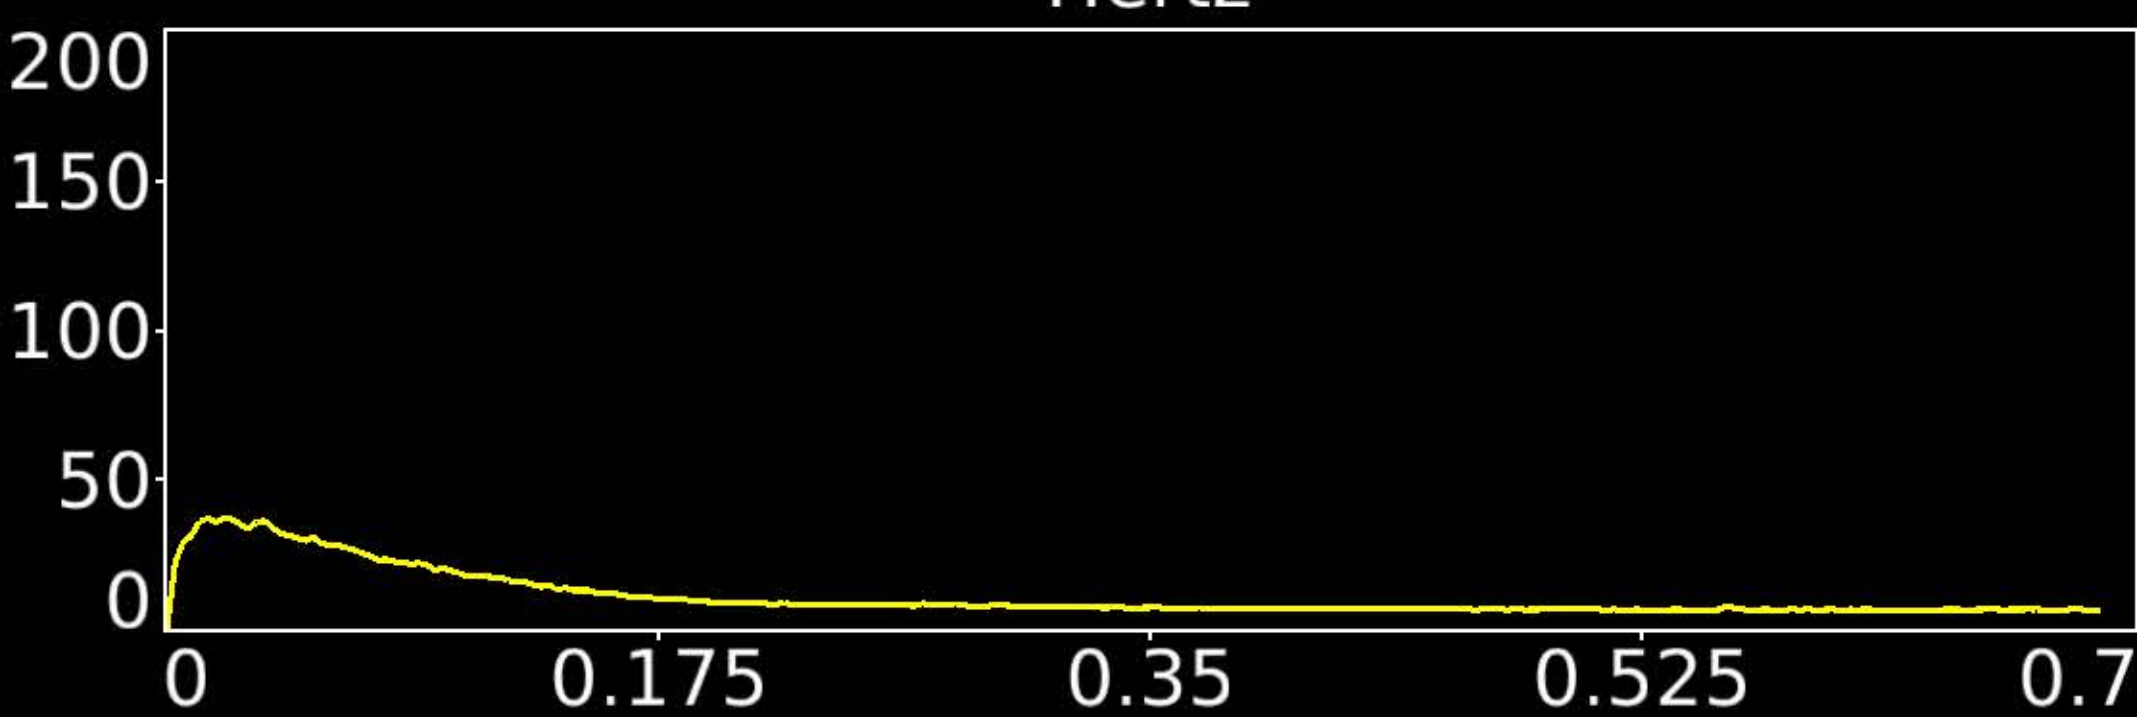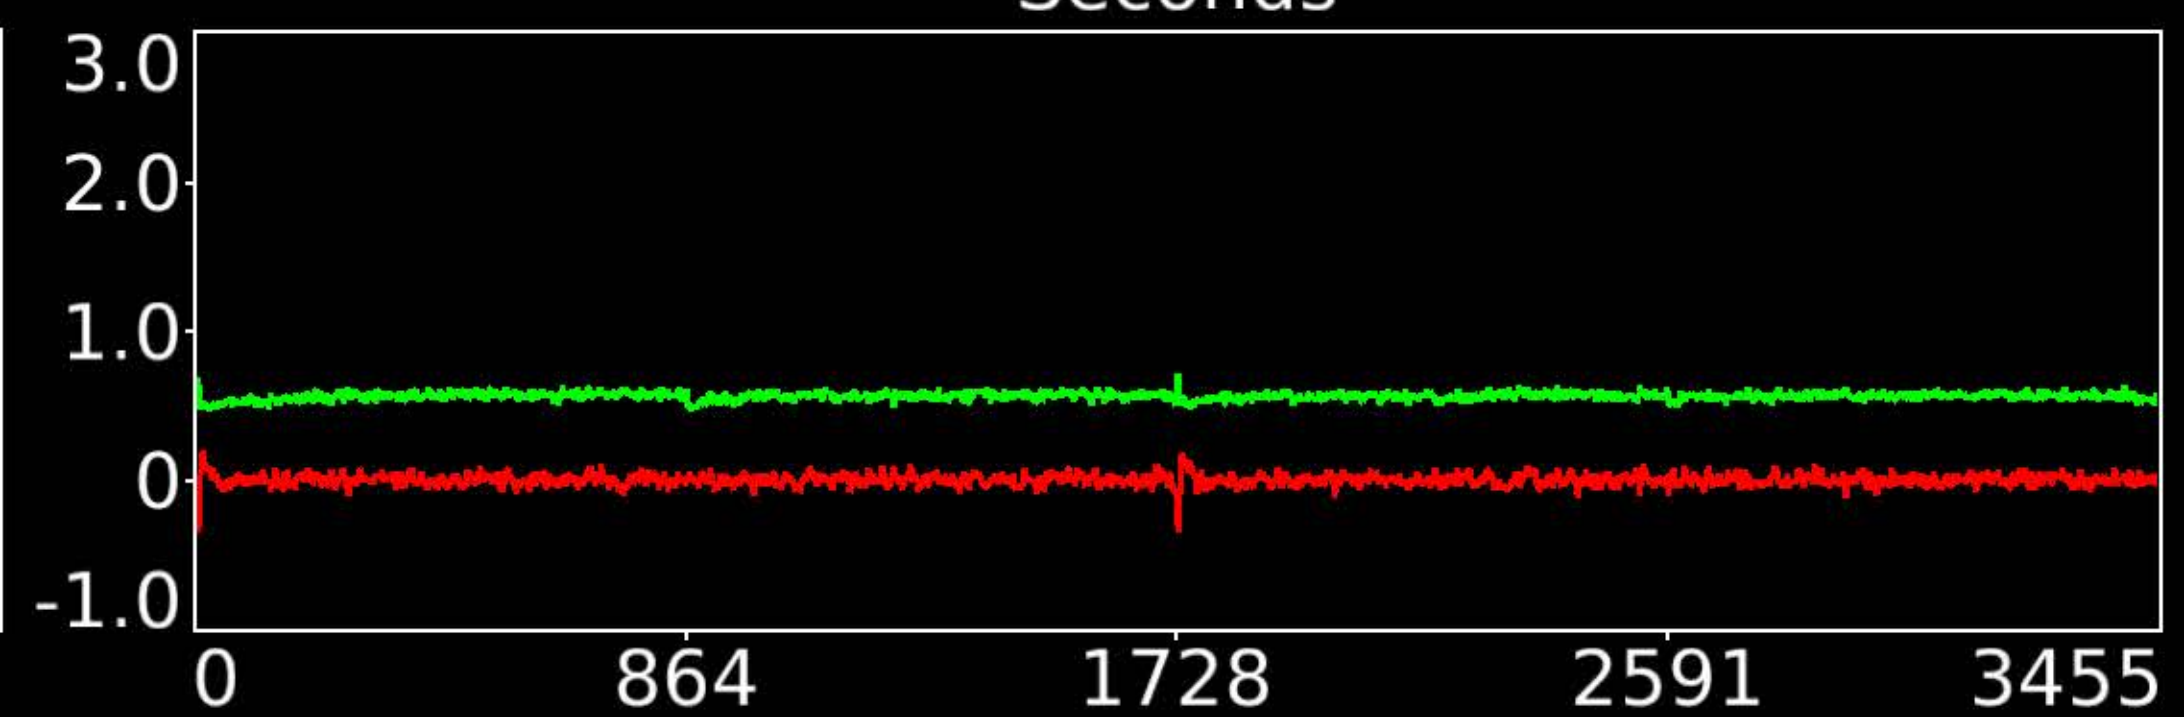

|                           |                           |                                           |  |
|---------------------------|---------------------------|-------------------------------------------|--|
| Number & Class: 76 Signal |                           | Name: Visuotopic: Foveal Dorsal > Ventral |  |
| RVT Correlated: No        | DVARS Dip Associated: No  | Cross-Subject Variable: No                |  |
| Single Subject: No        | % Variance Explained: 0.5 | Globality Index: 0.04                     |  |
| Task Component: 65        | Taskr Component: 53       | Sleep Noted: No                           |  |

Rationale: Spatial map includes positive and negative patches that respect known retinotopic visual organization (Foveal and Lower vs Upper)



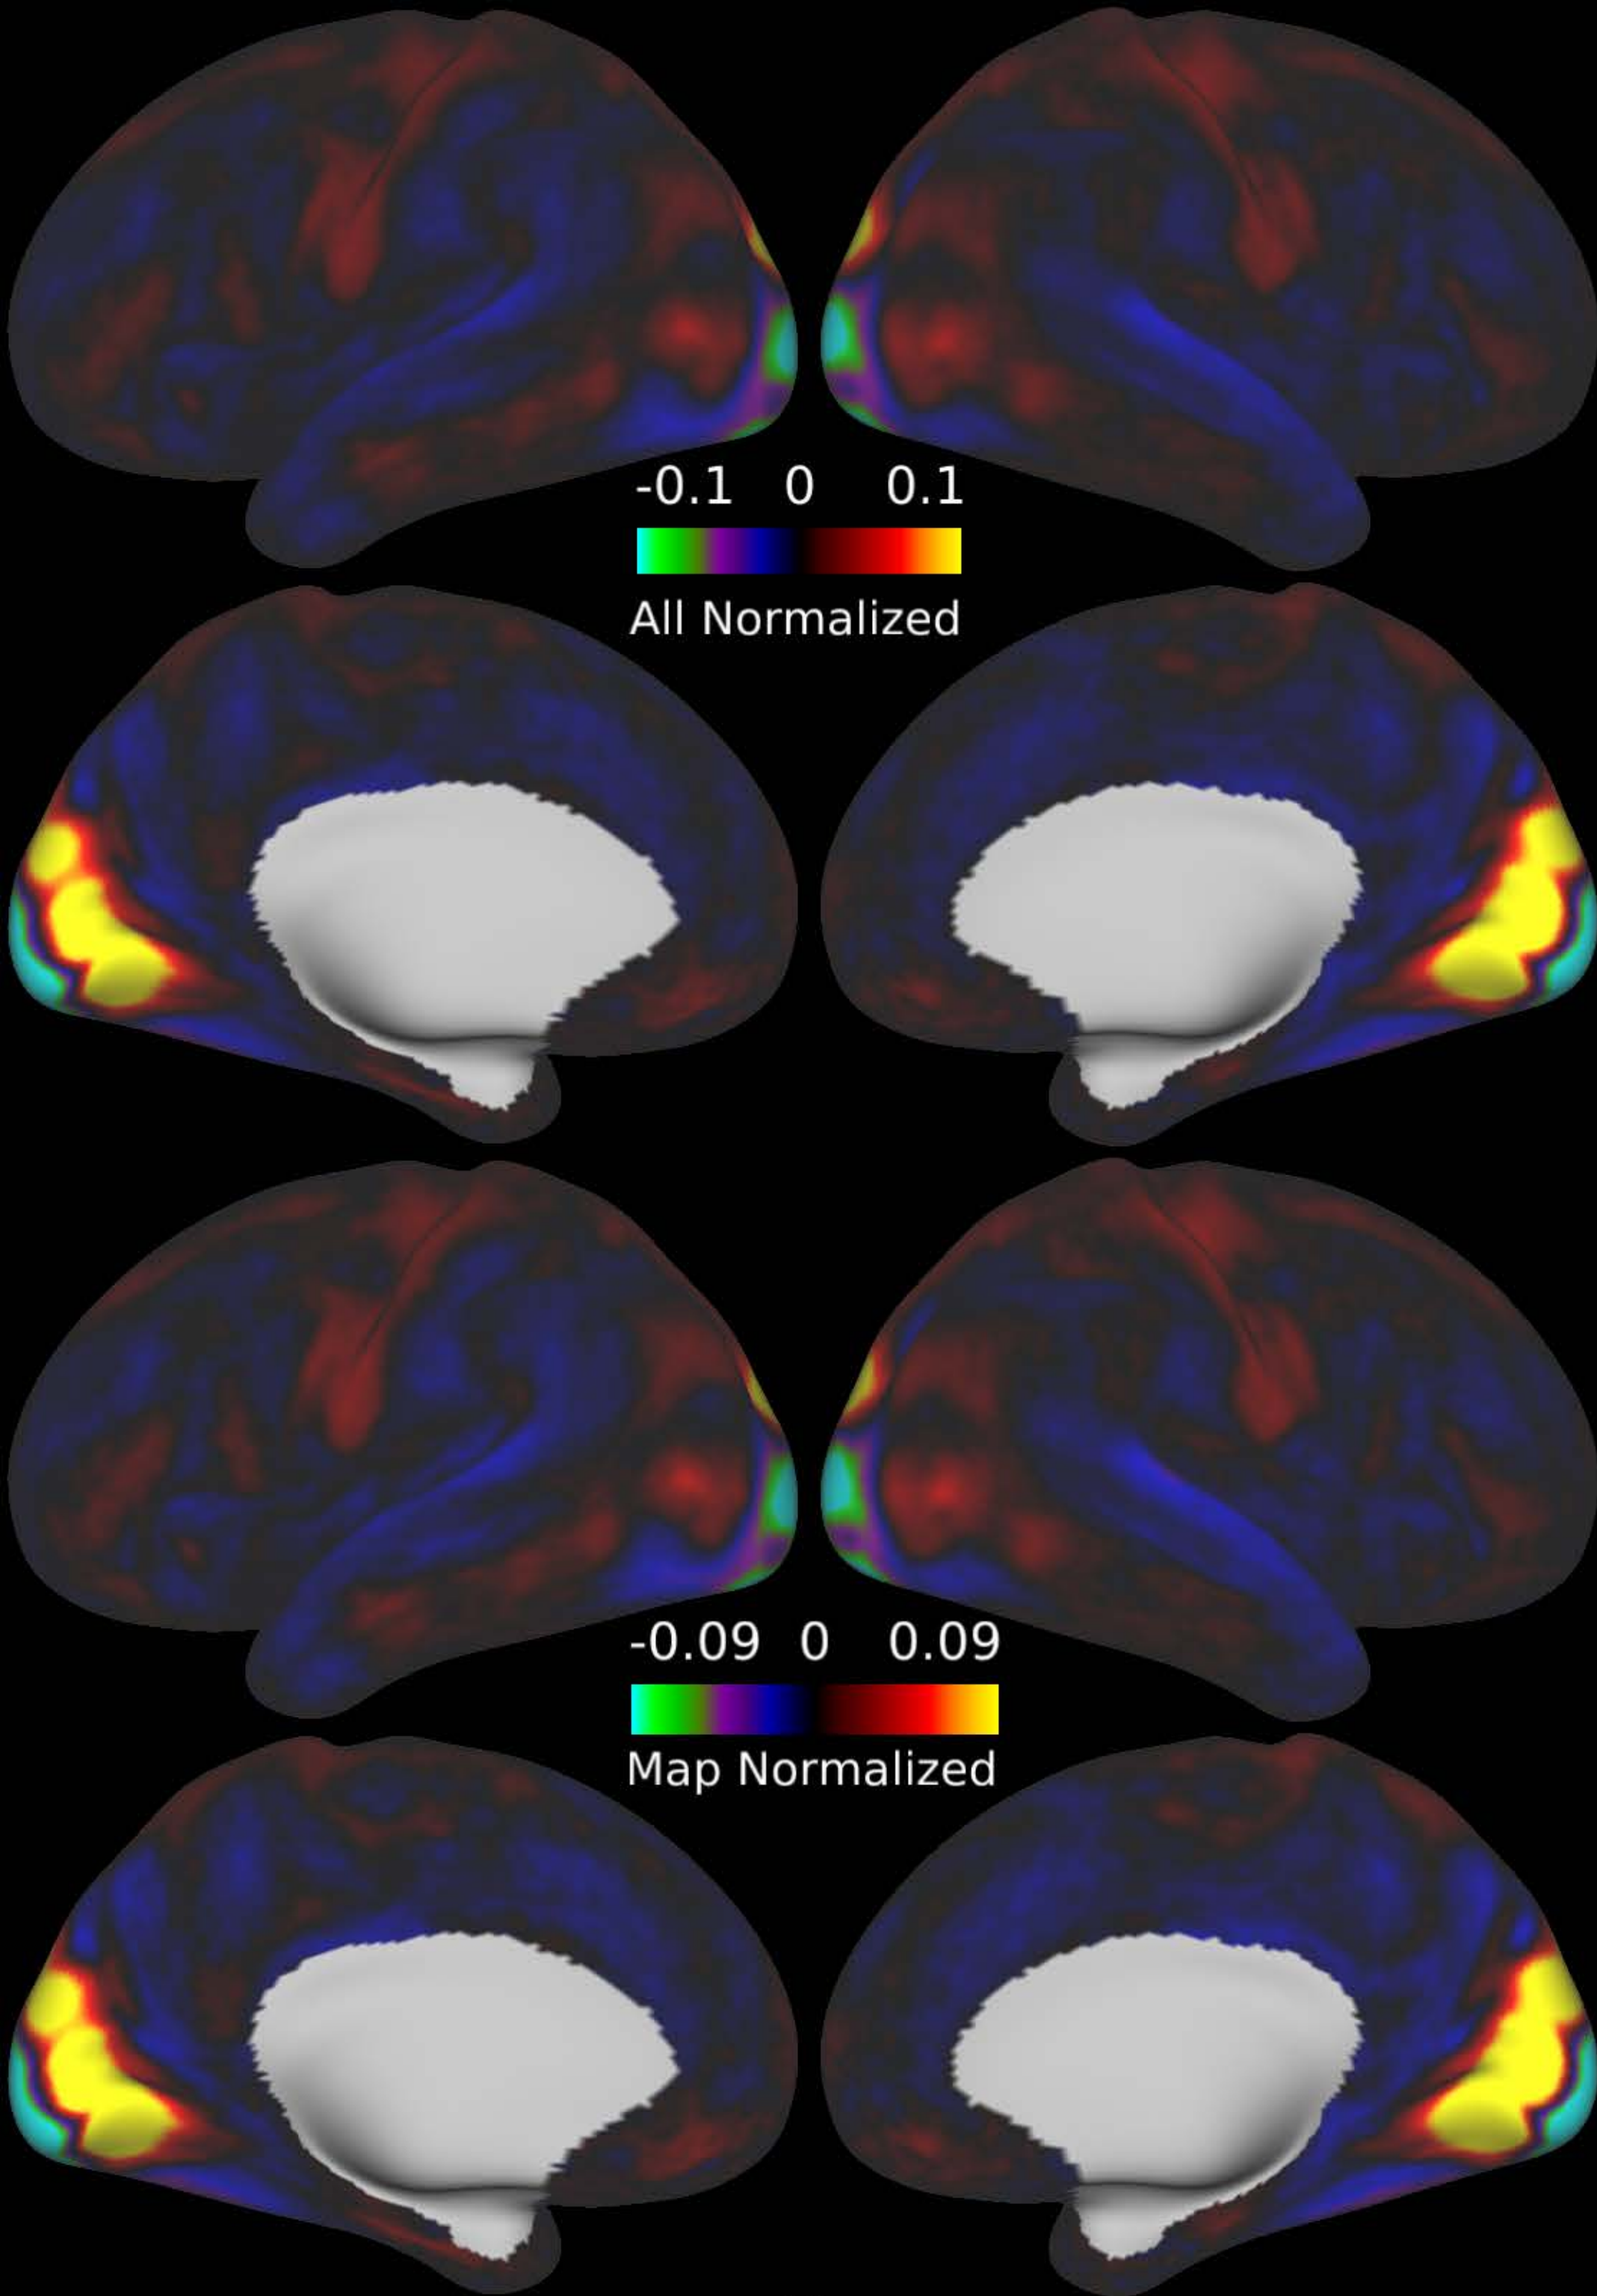

Hertz

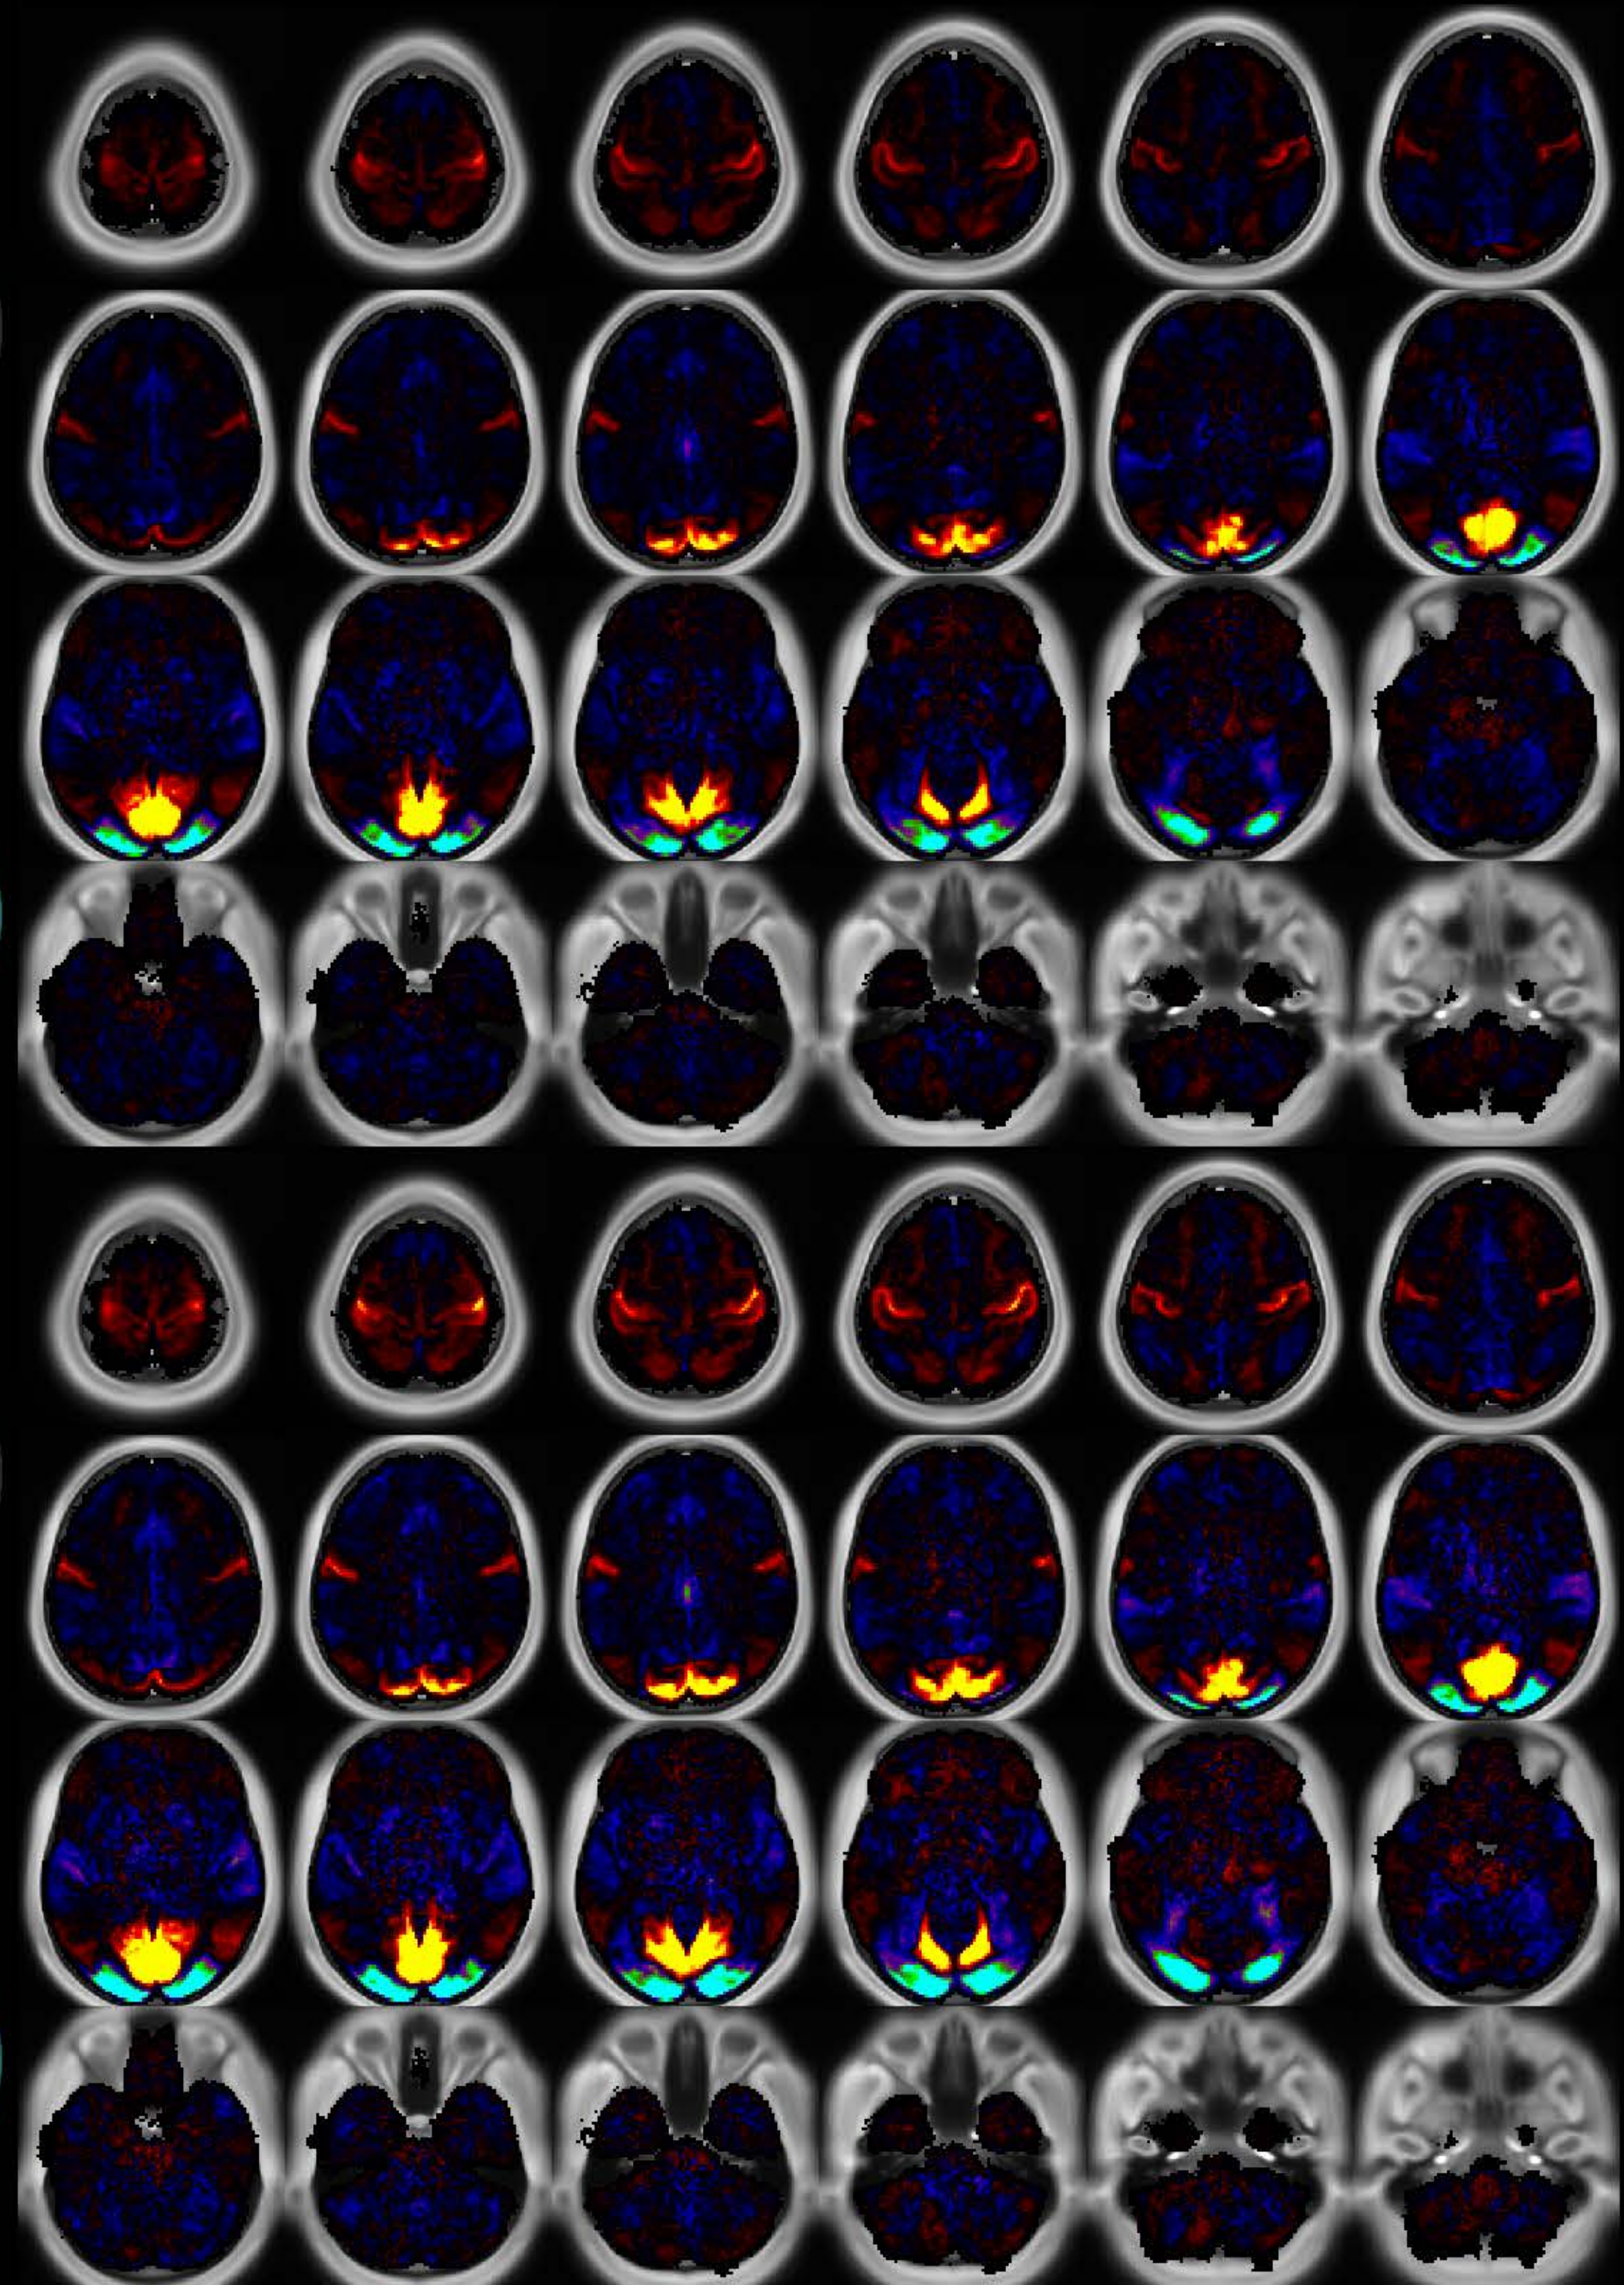

Seconds

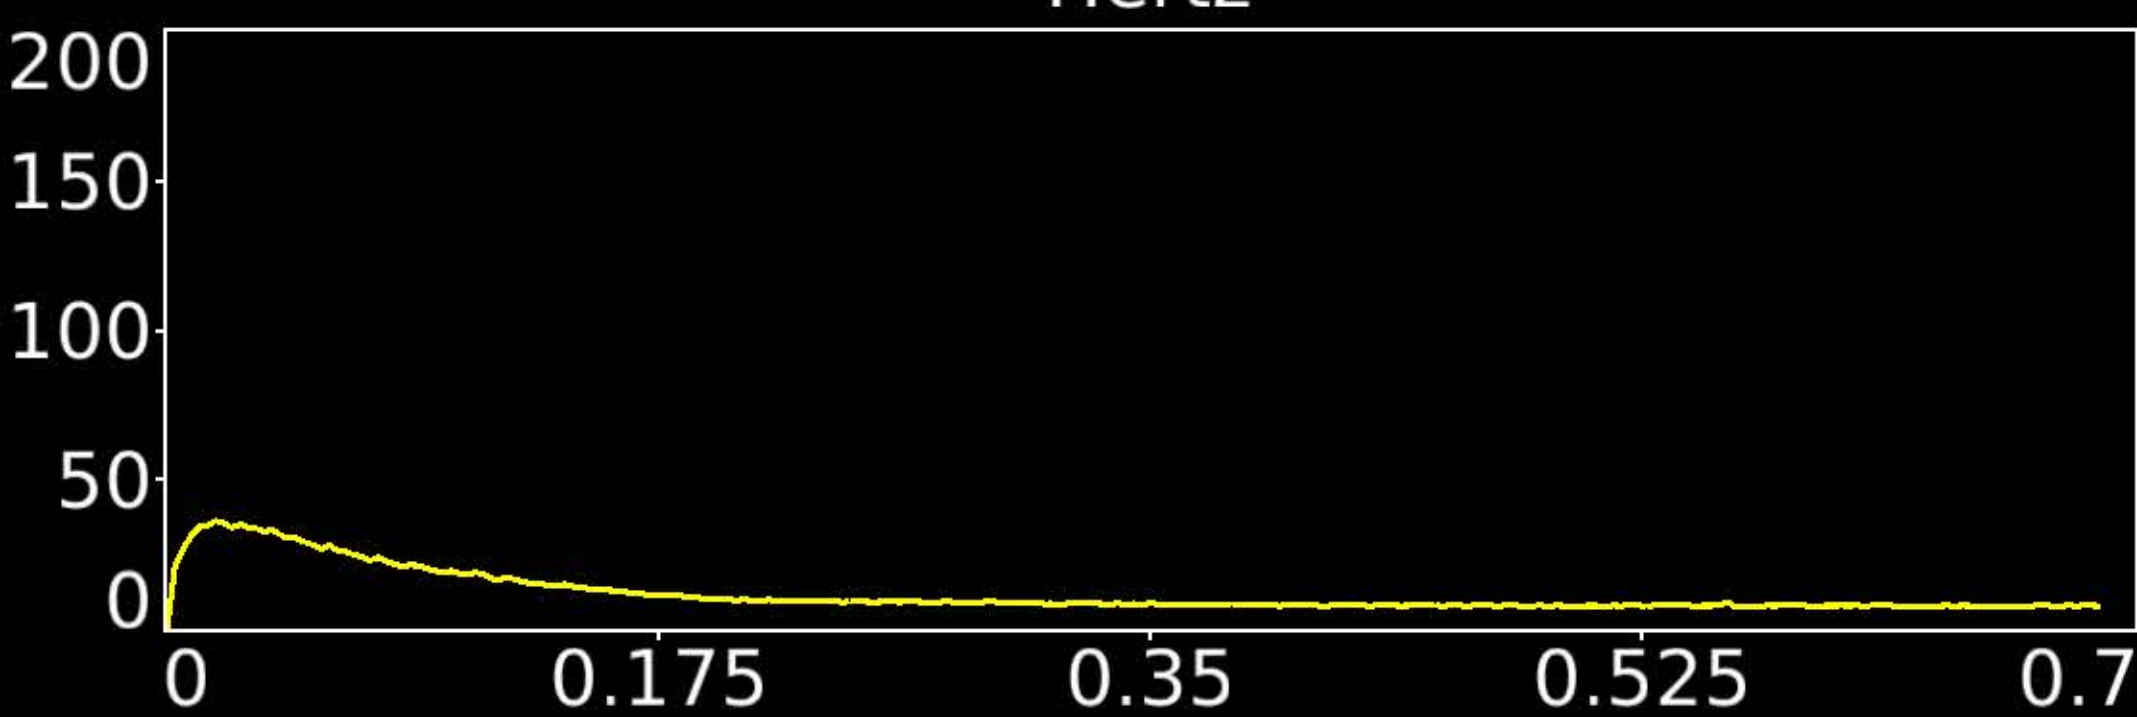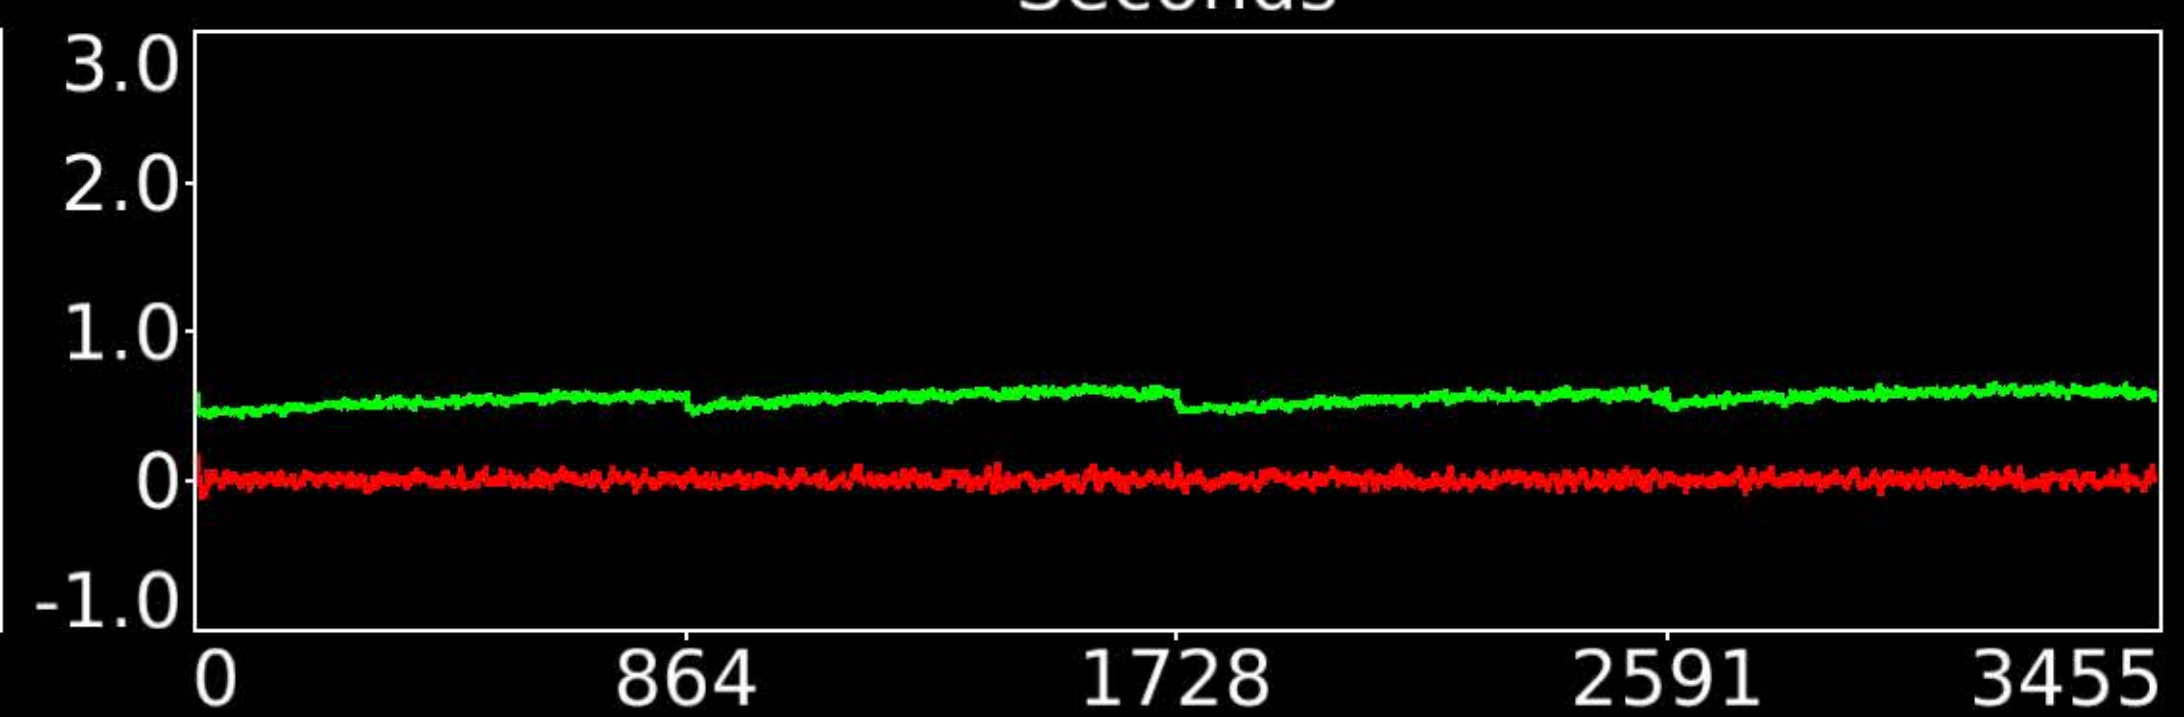

|                           |                            |                                        |  |
|---------------------------|----------------------------|----------------------------------------|--|
| Number & Class: 77 Signal |                            | Name: Visuotopic: ParaCentral > Foveal |  |
| RVT Correlated: No        | DVARS Dip Associated: No   | Cross-Subject Variable: No             |  |
| Single Subject: No        | % Variance Explained: 0.48 | Globality Index: 0.52                  |  |
| Task Component: No        | Taskr Component: No        | Sleep Noted: No                        |  |

Rationale: Spatial map includes positive and negative patches that respect known retinotopic visual organization (Paracentral vs Foveal)



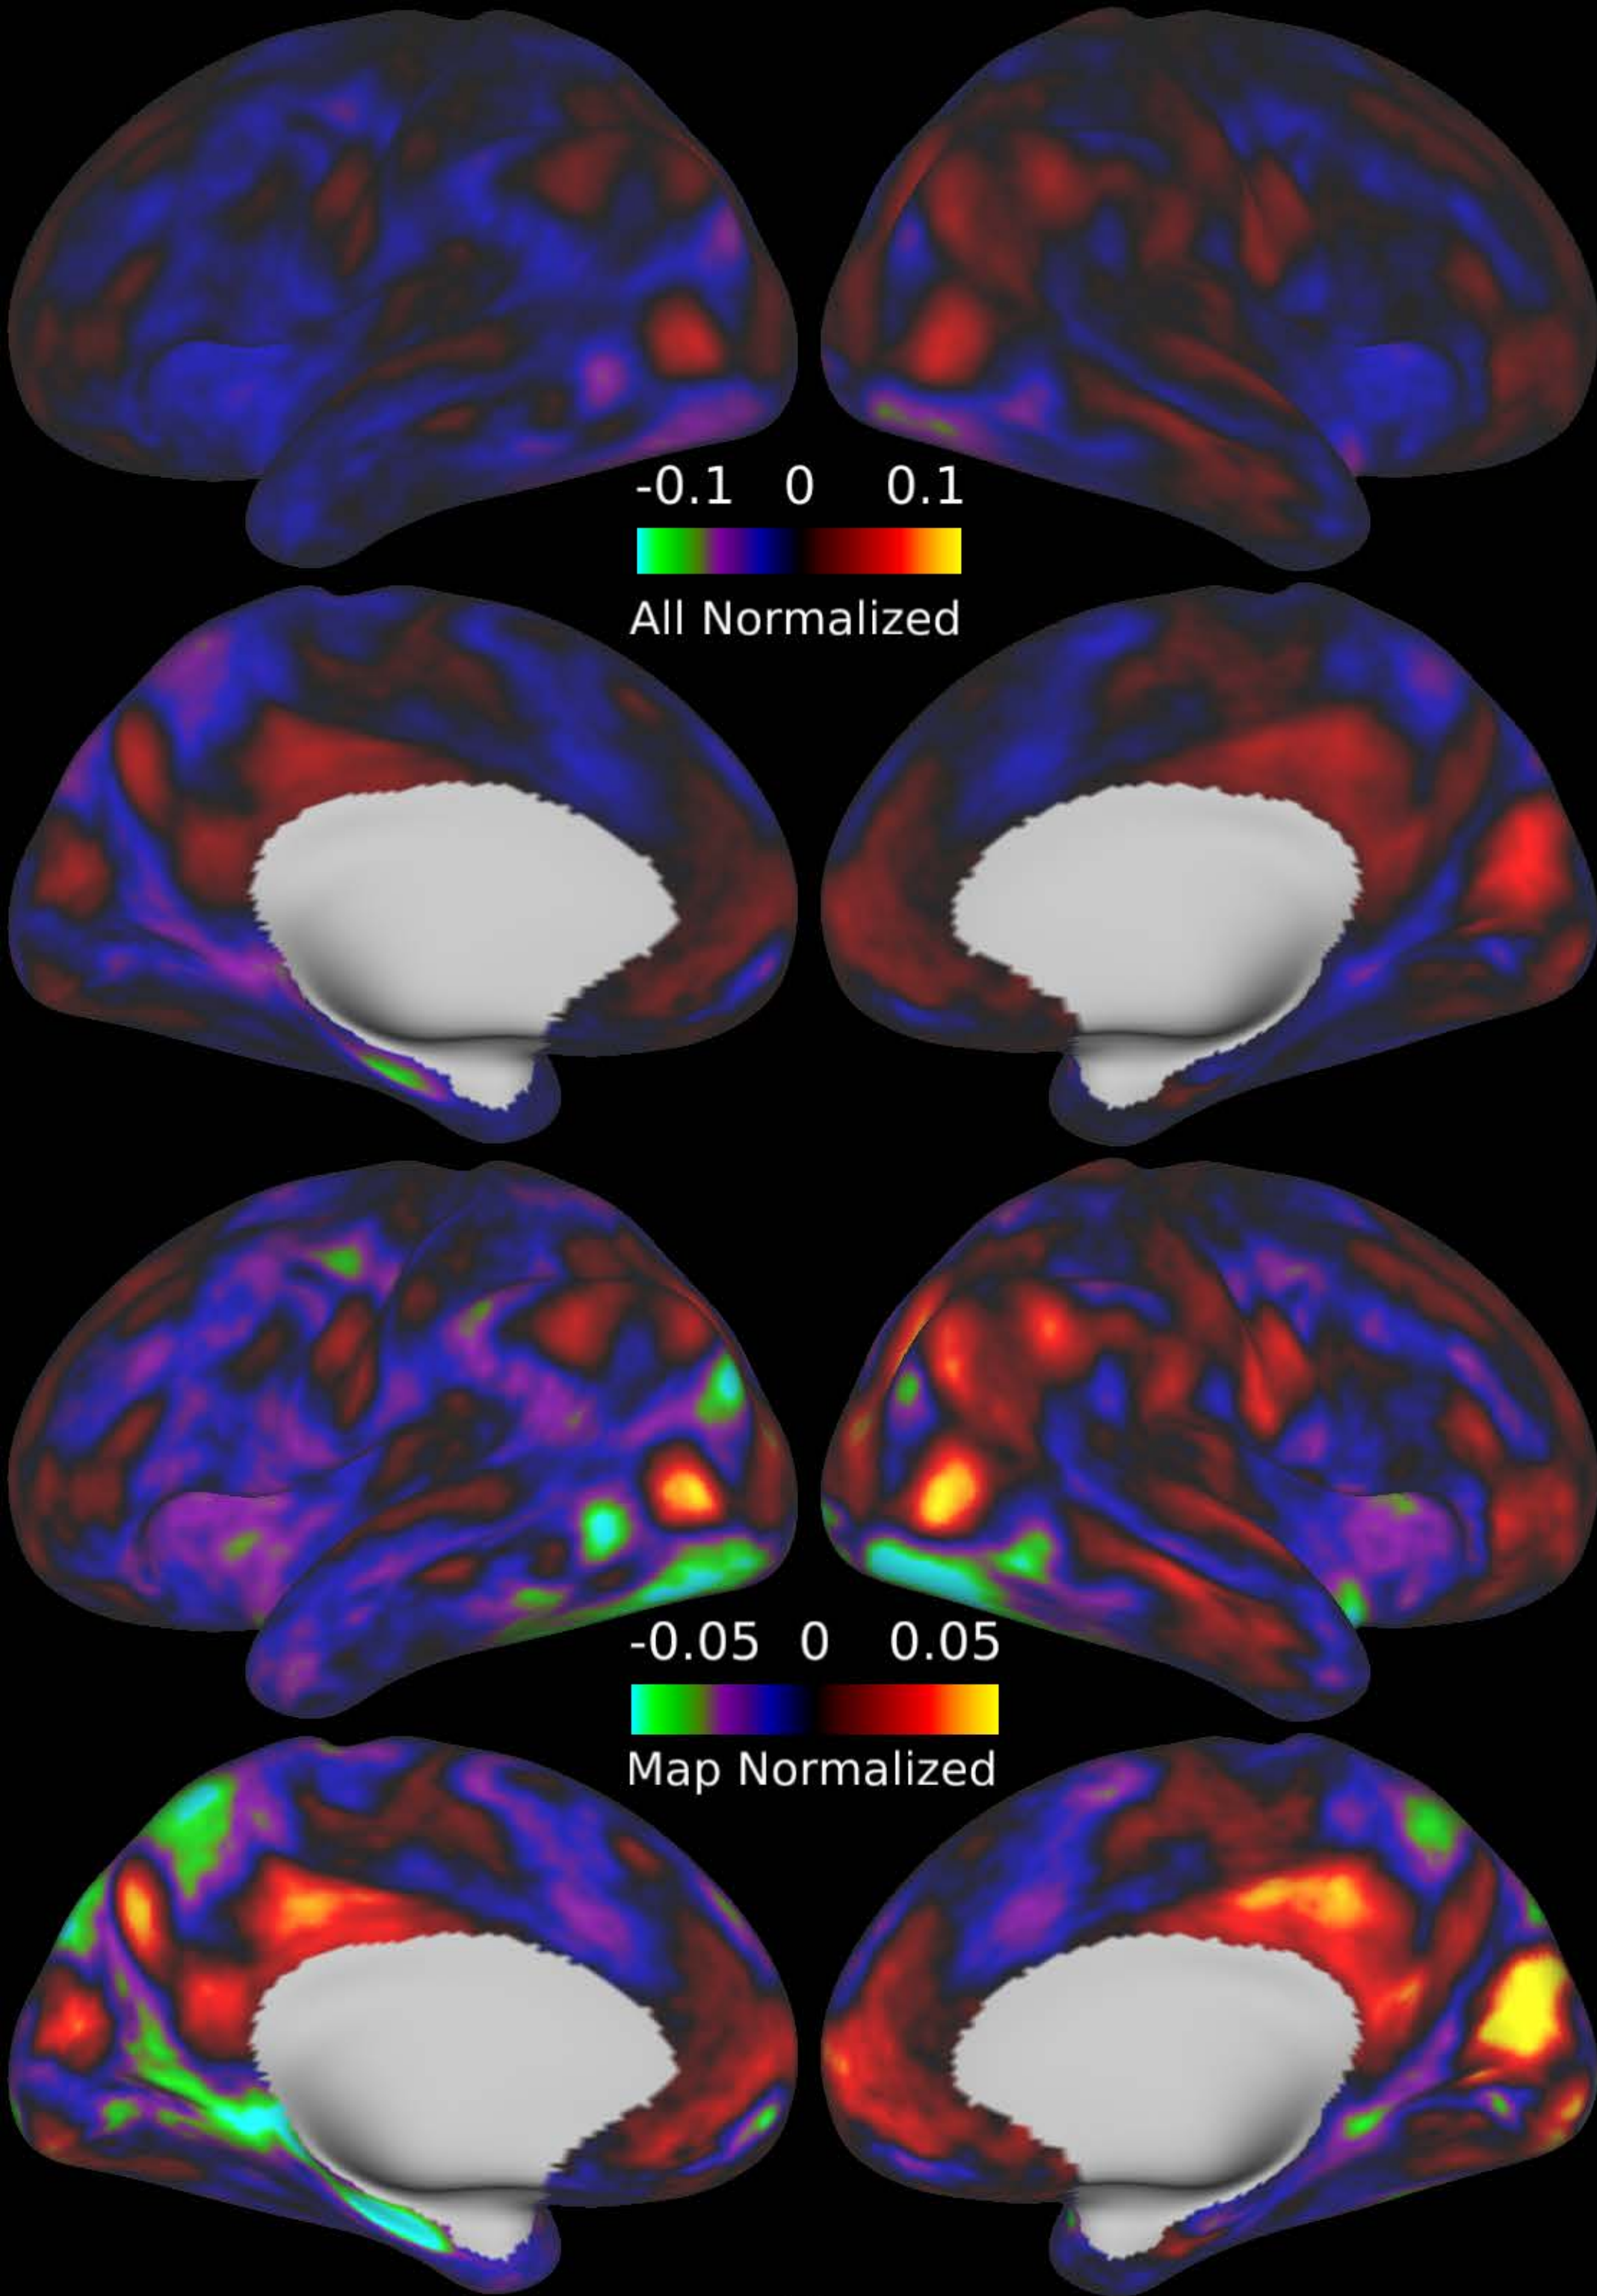

Hertz

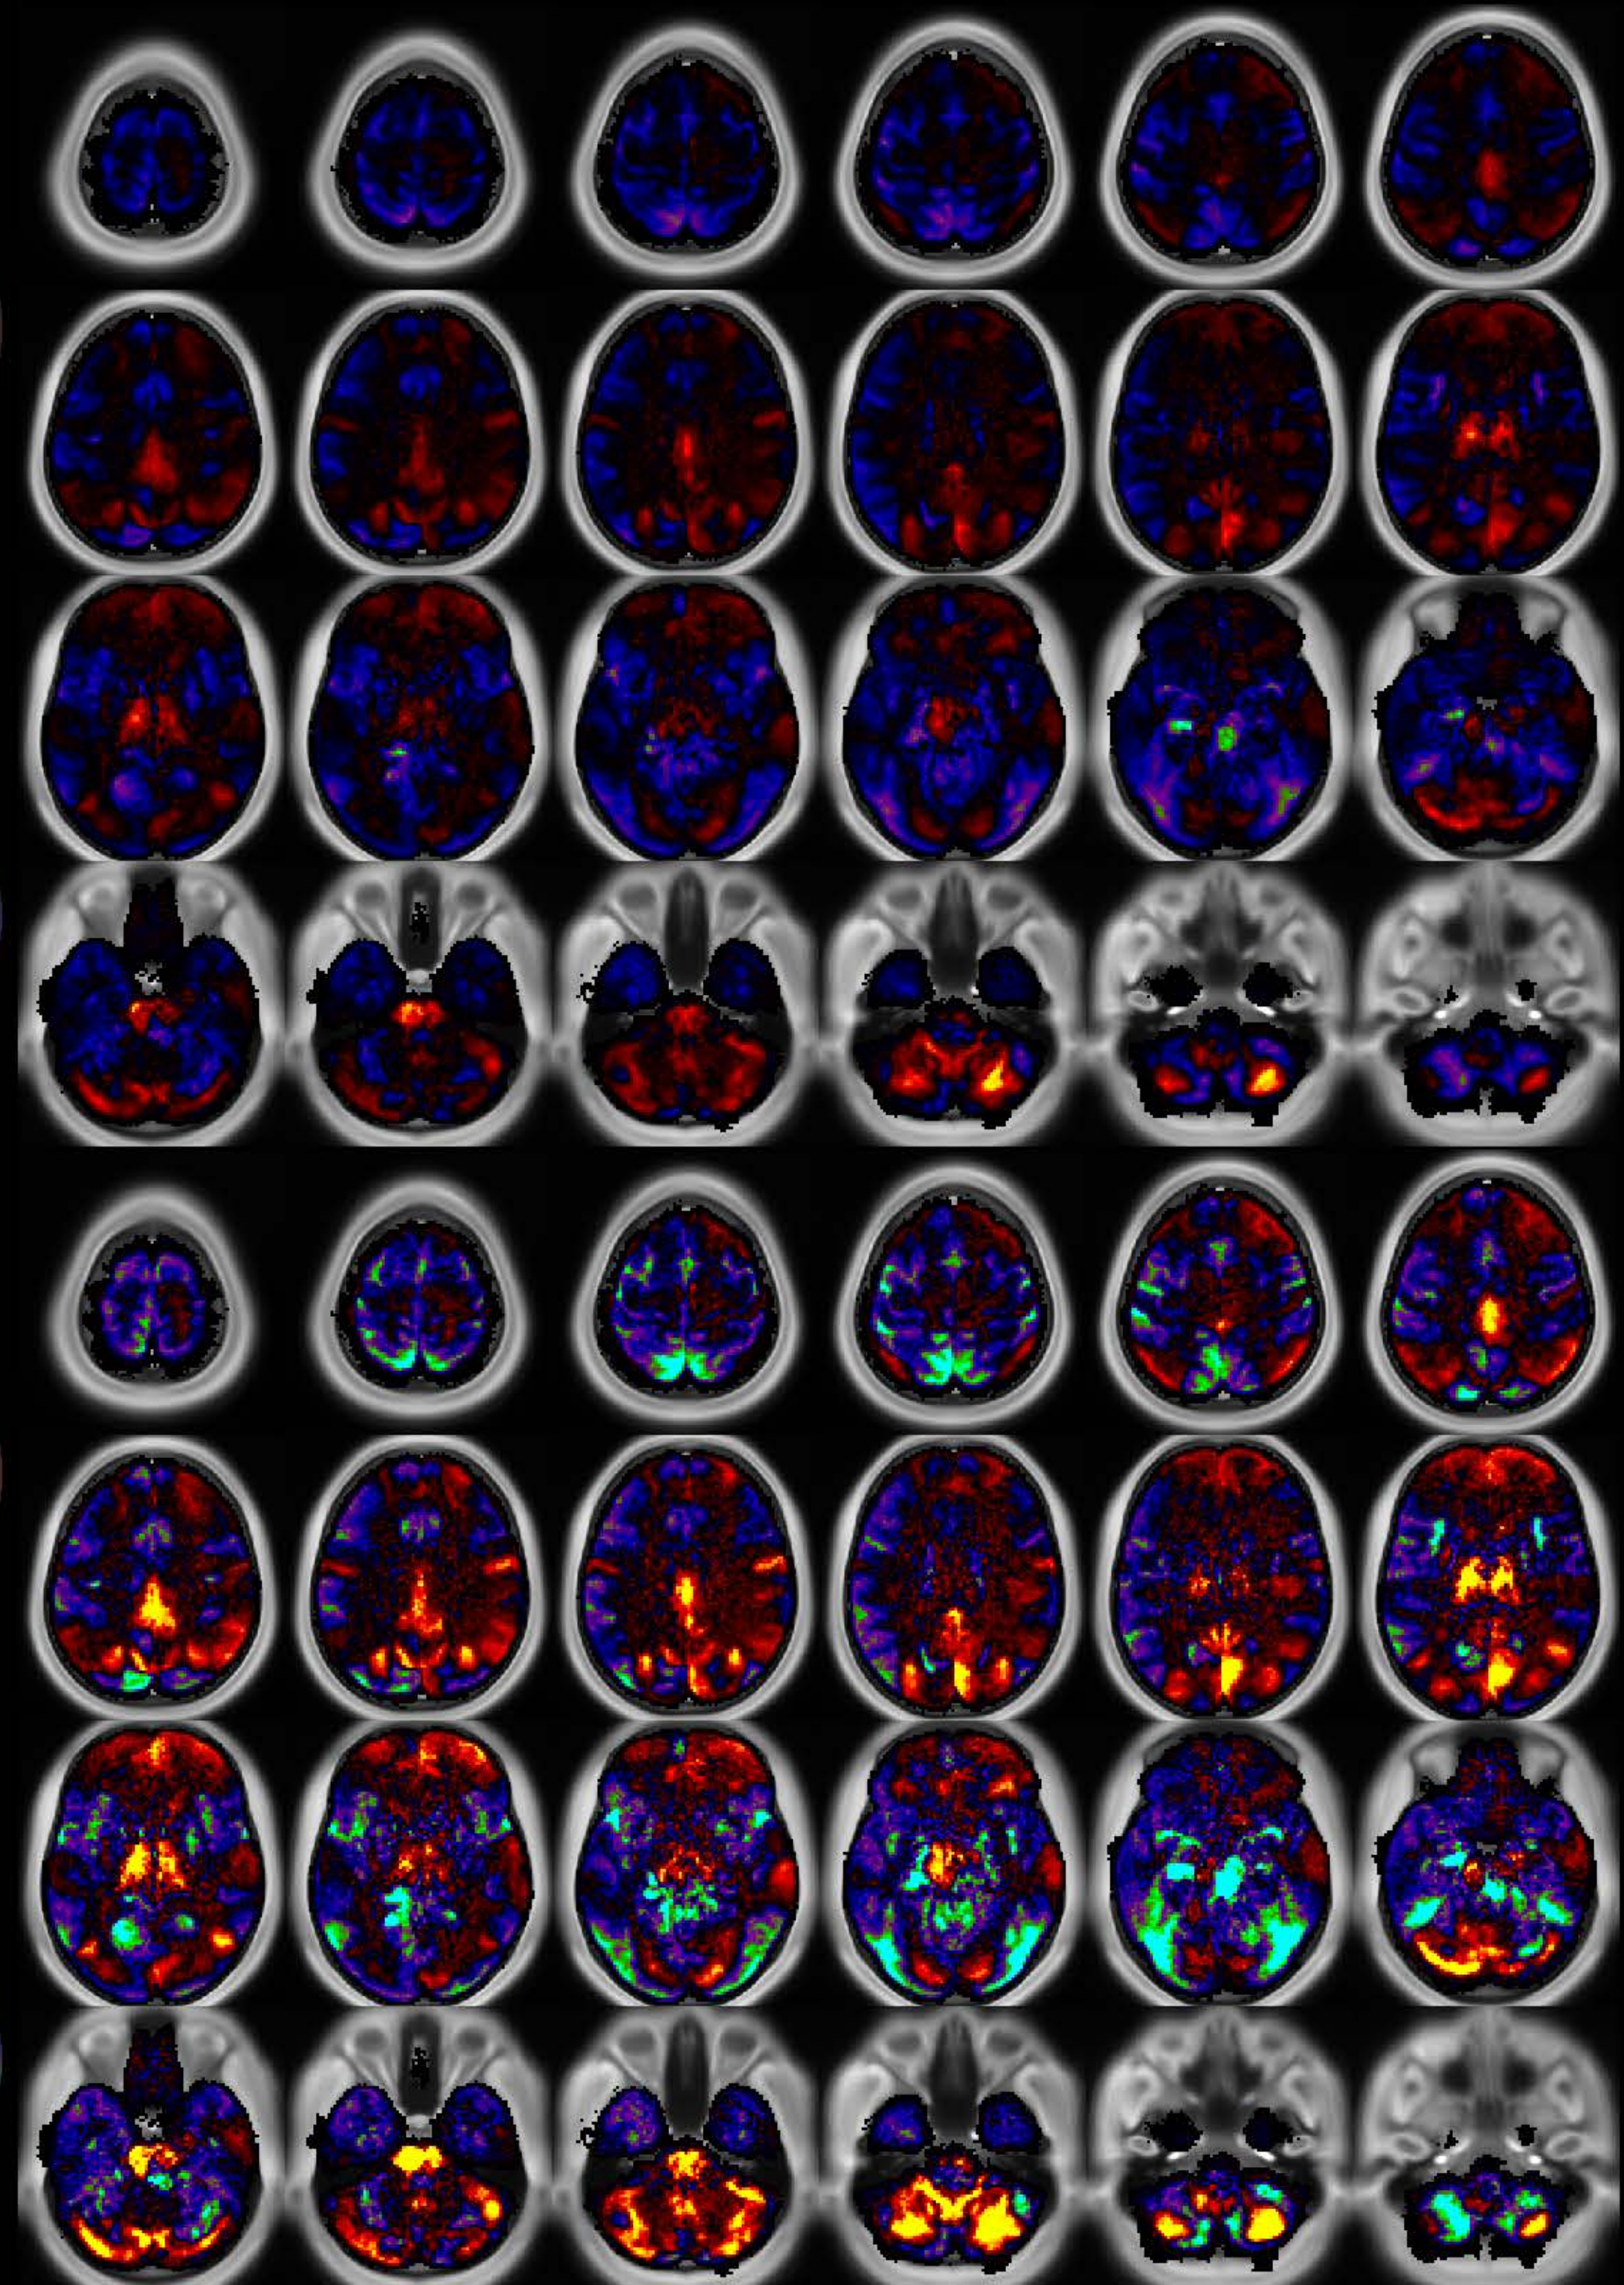

Seconds

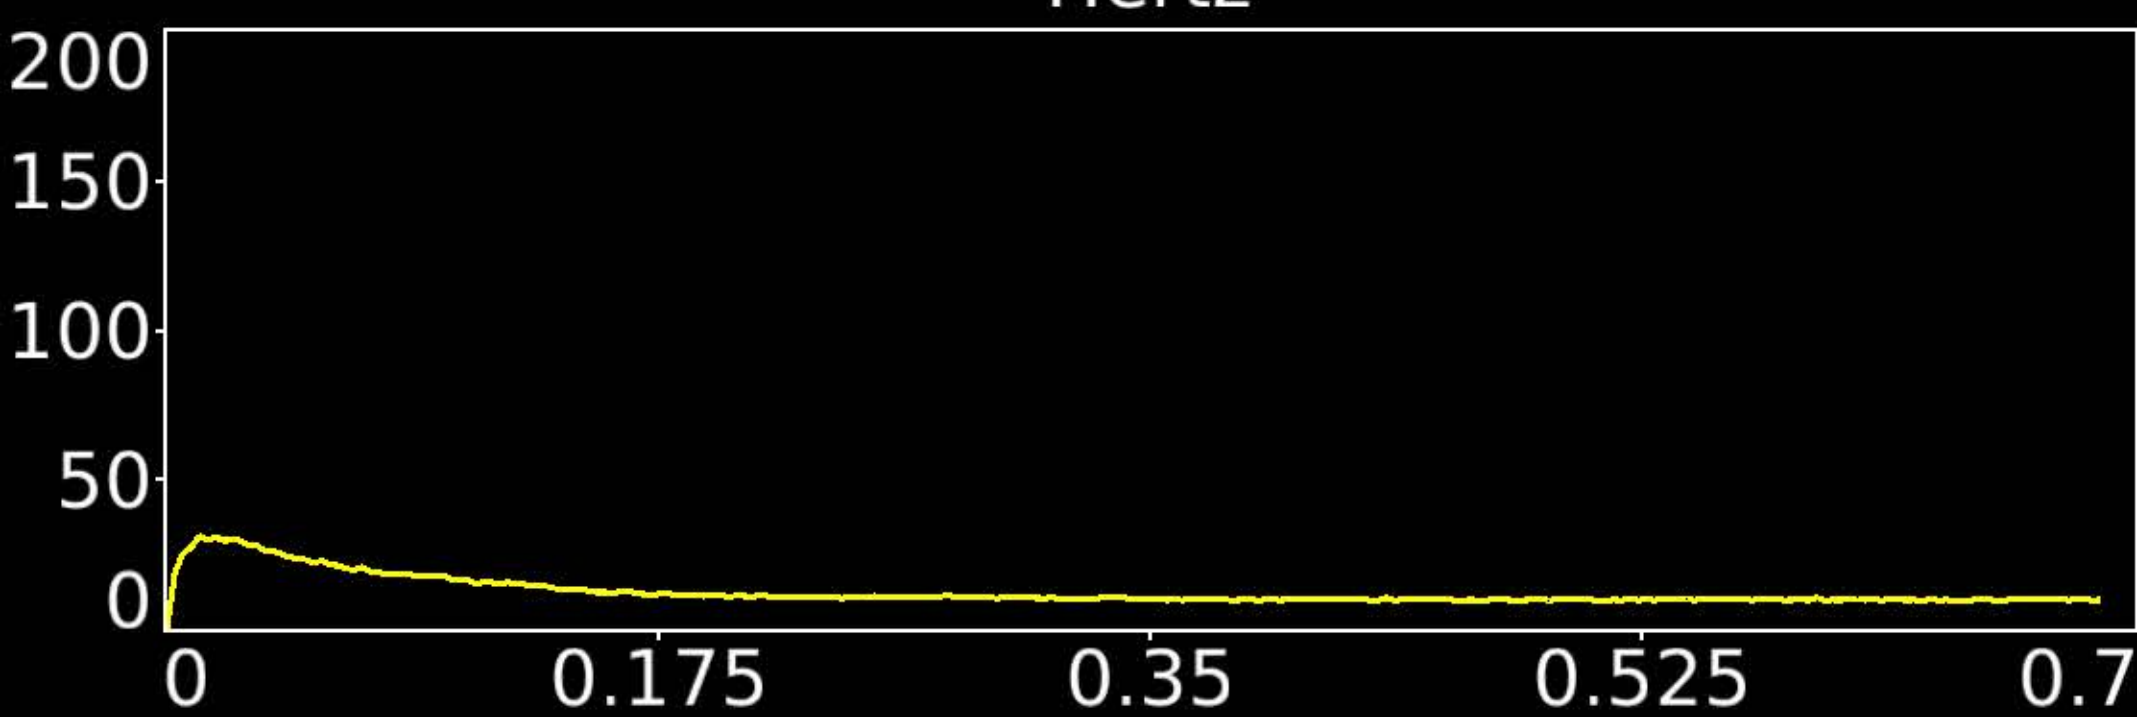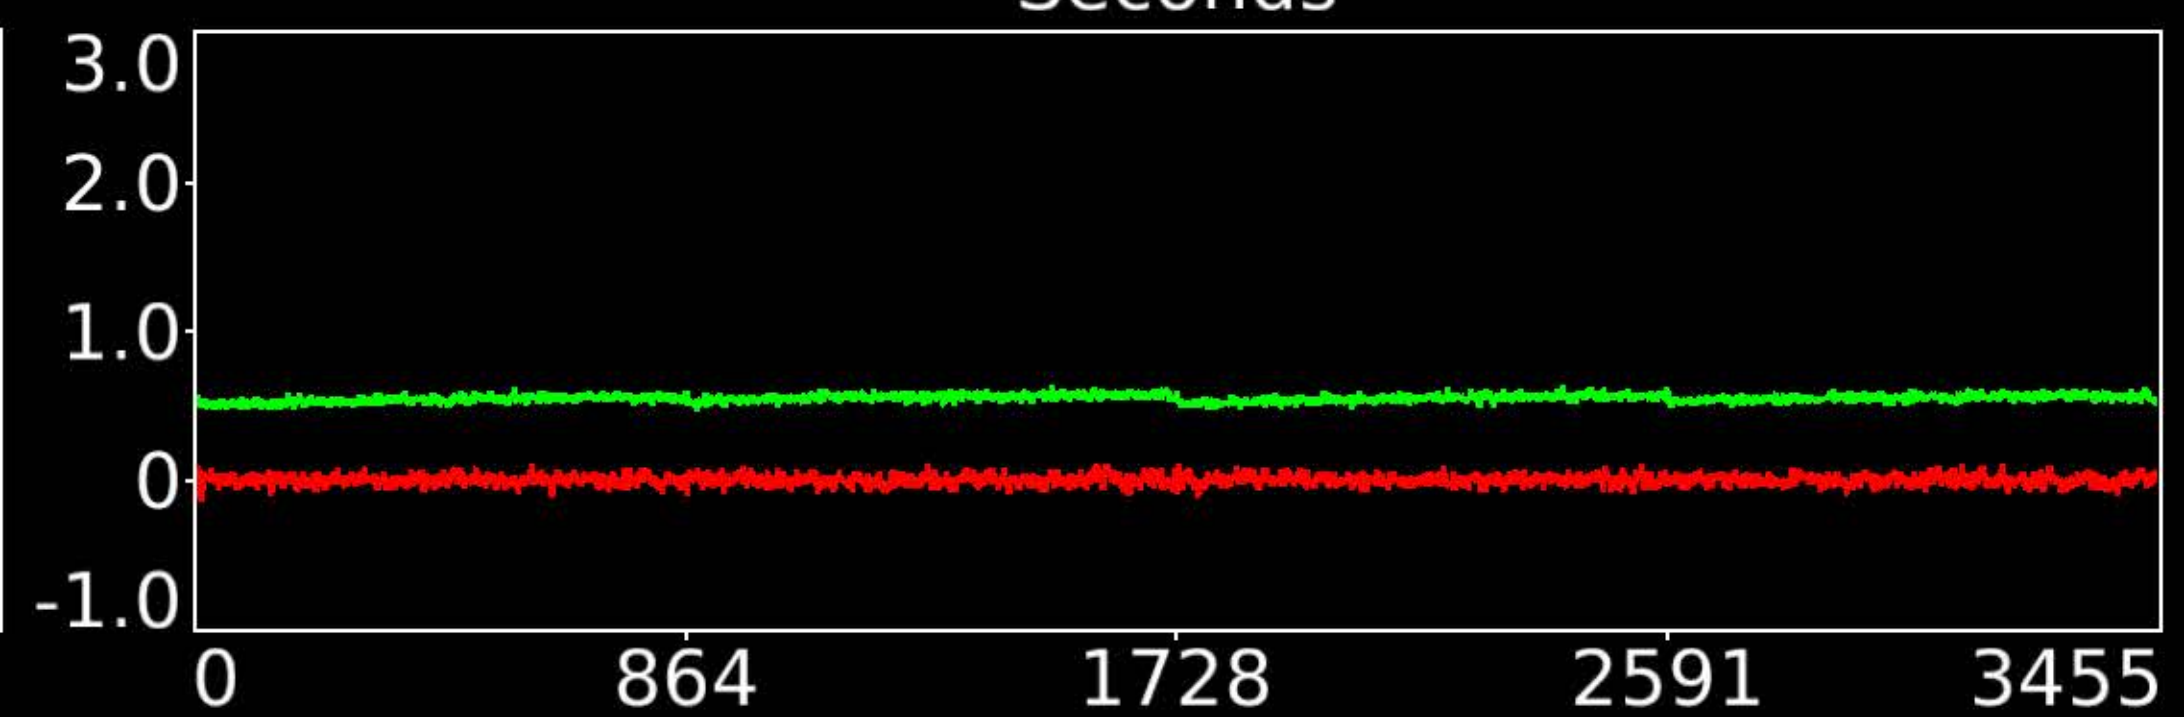

Number & Class: 78 Noise

Name: Single Subject Global Physiological Noise

RVT Correlated: No

DVARS Dip Associated: No

Cross-Subject Variable: No

Single Subject: Yes

% Variance Explained: 0.46

Globality Index: 0.47

Task Component: No

Taskr Component: No

Sleep Noted: No

Rationale: Single subject component with high correlation to global timecourse



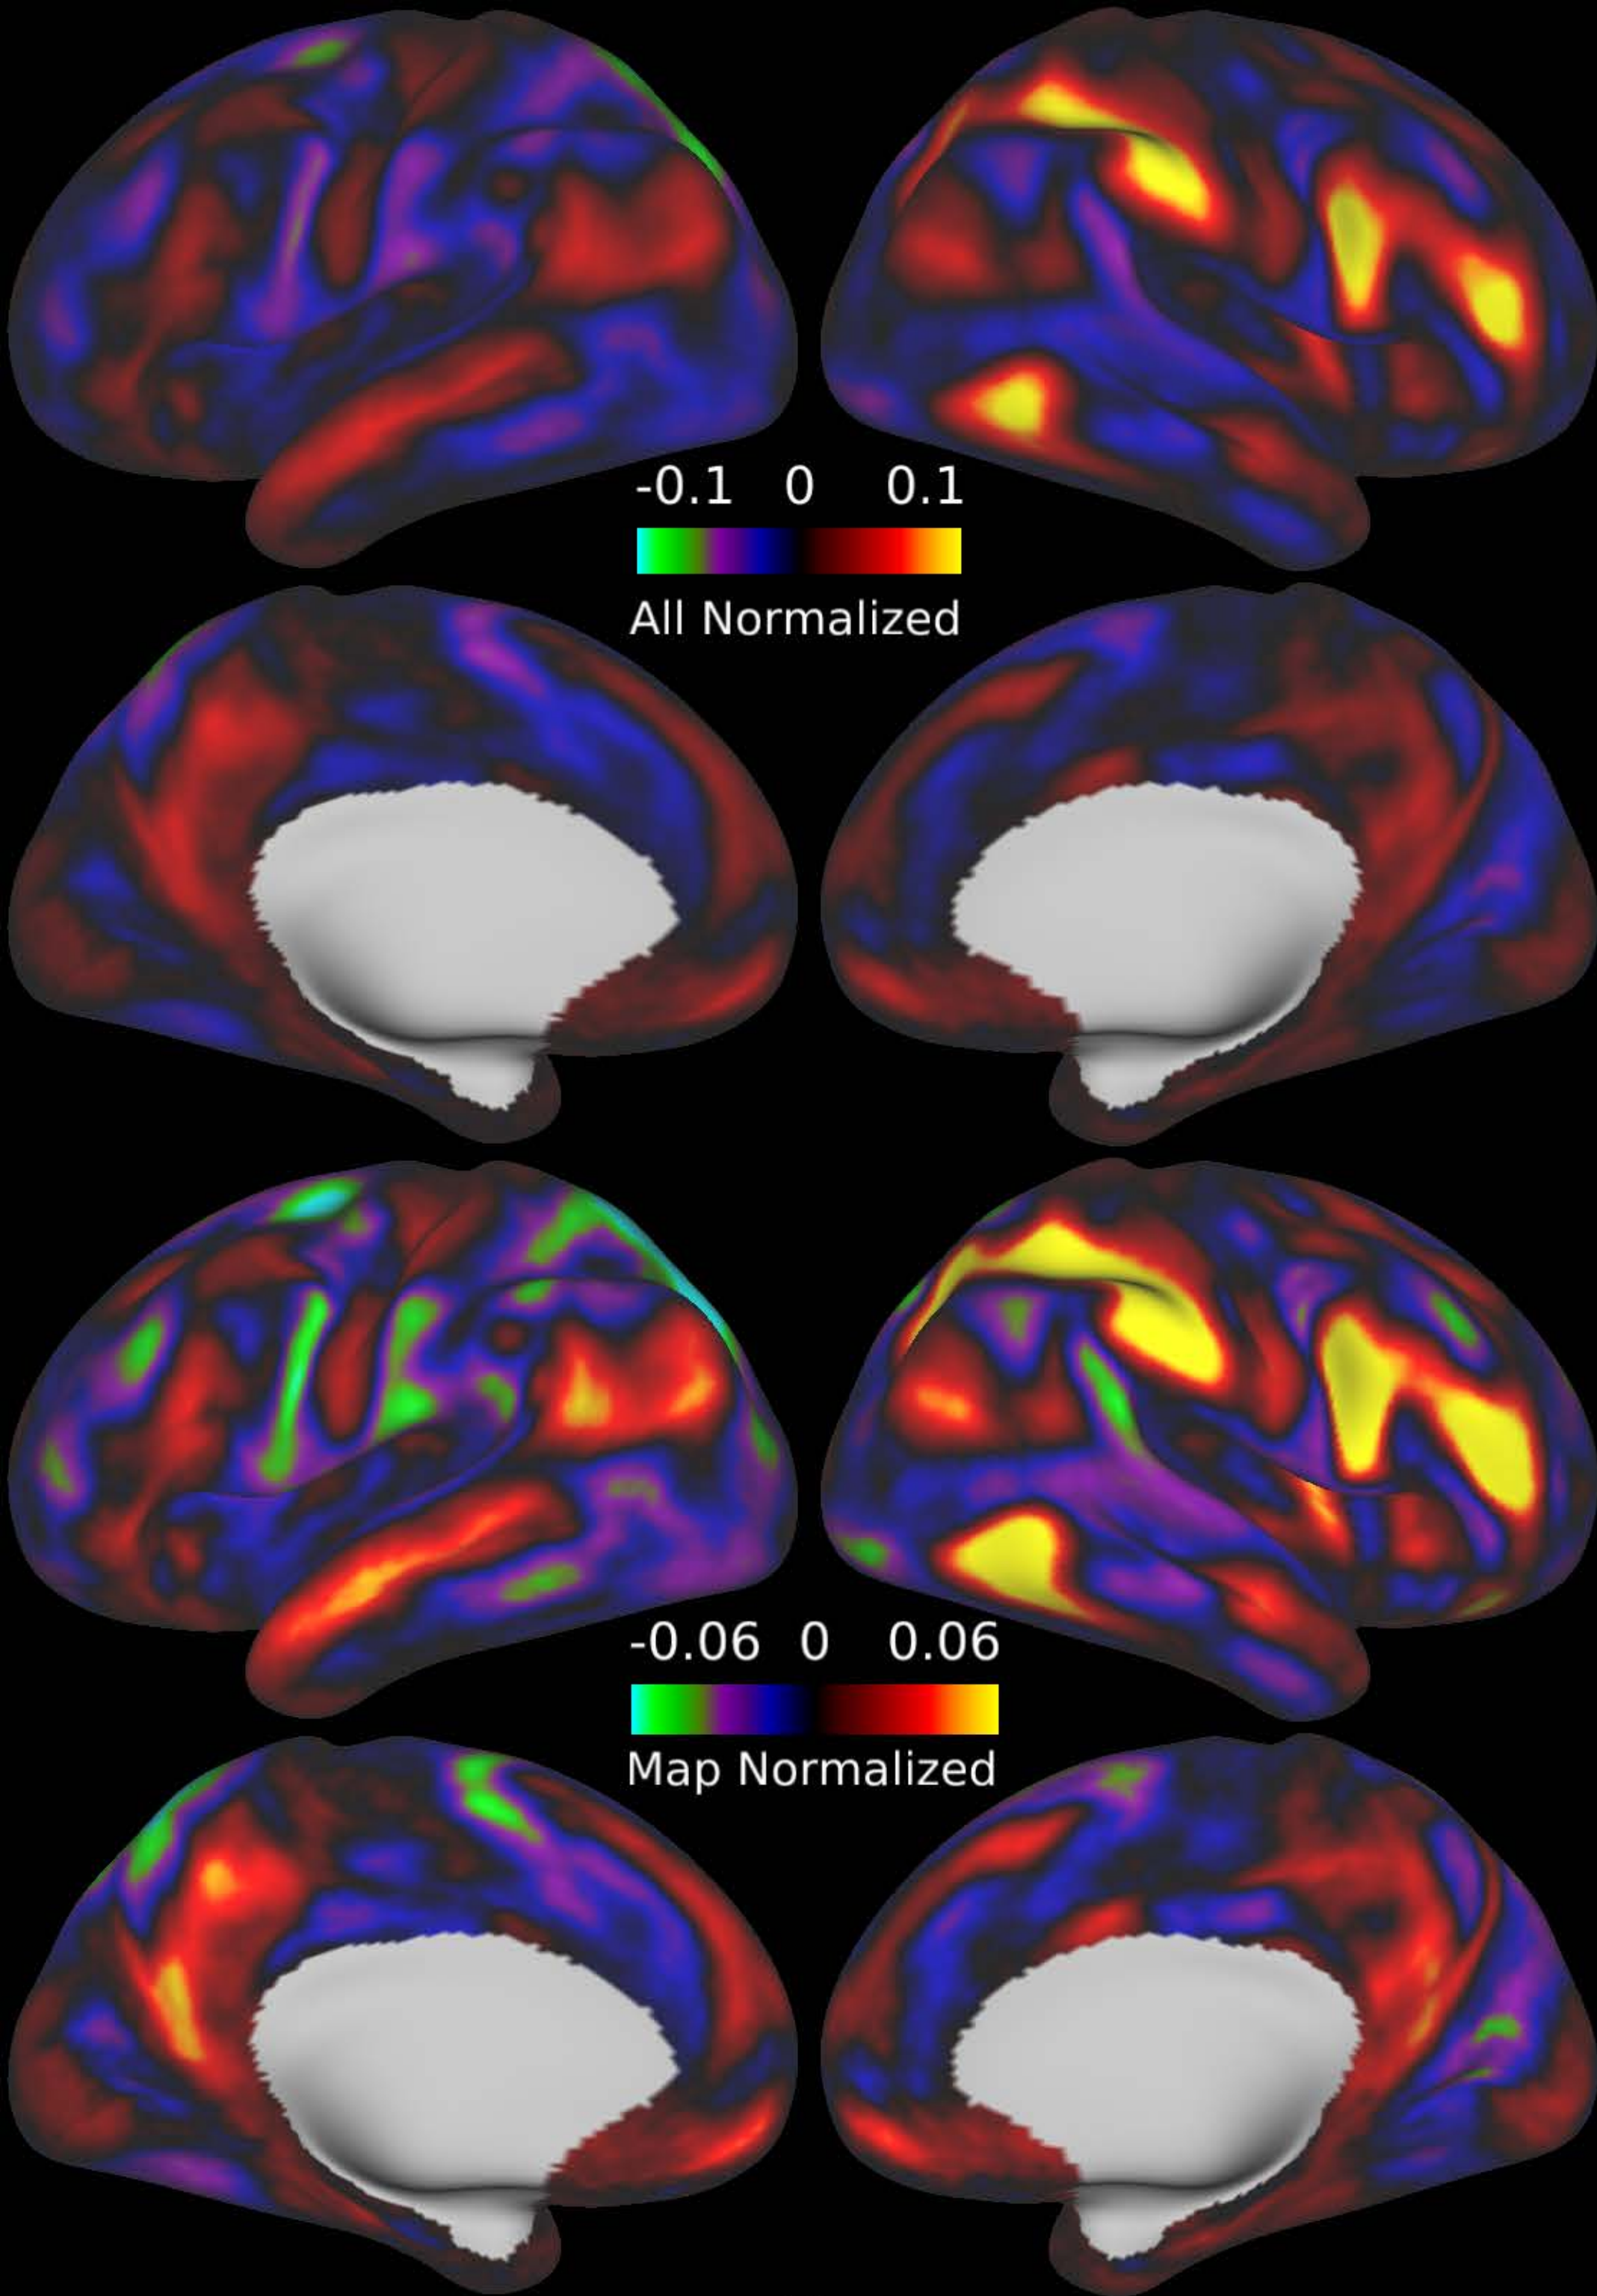

Hertz

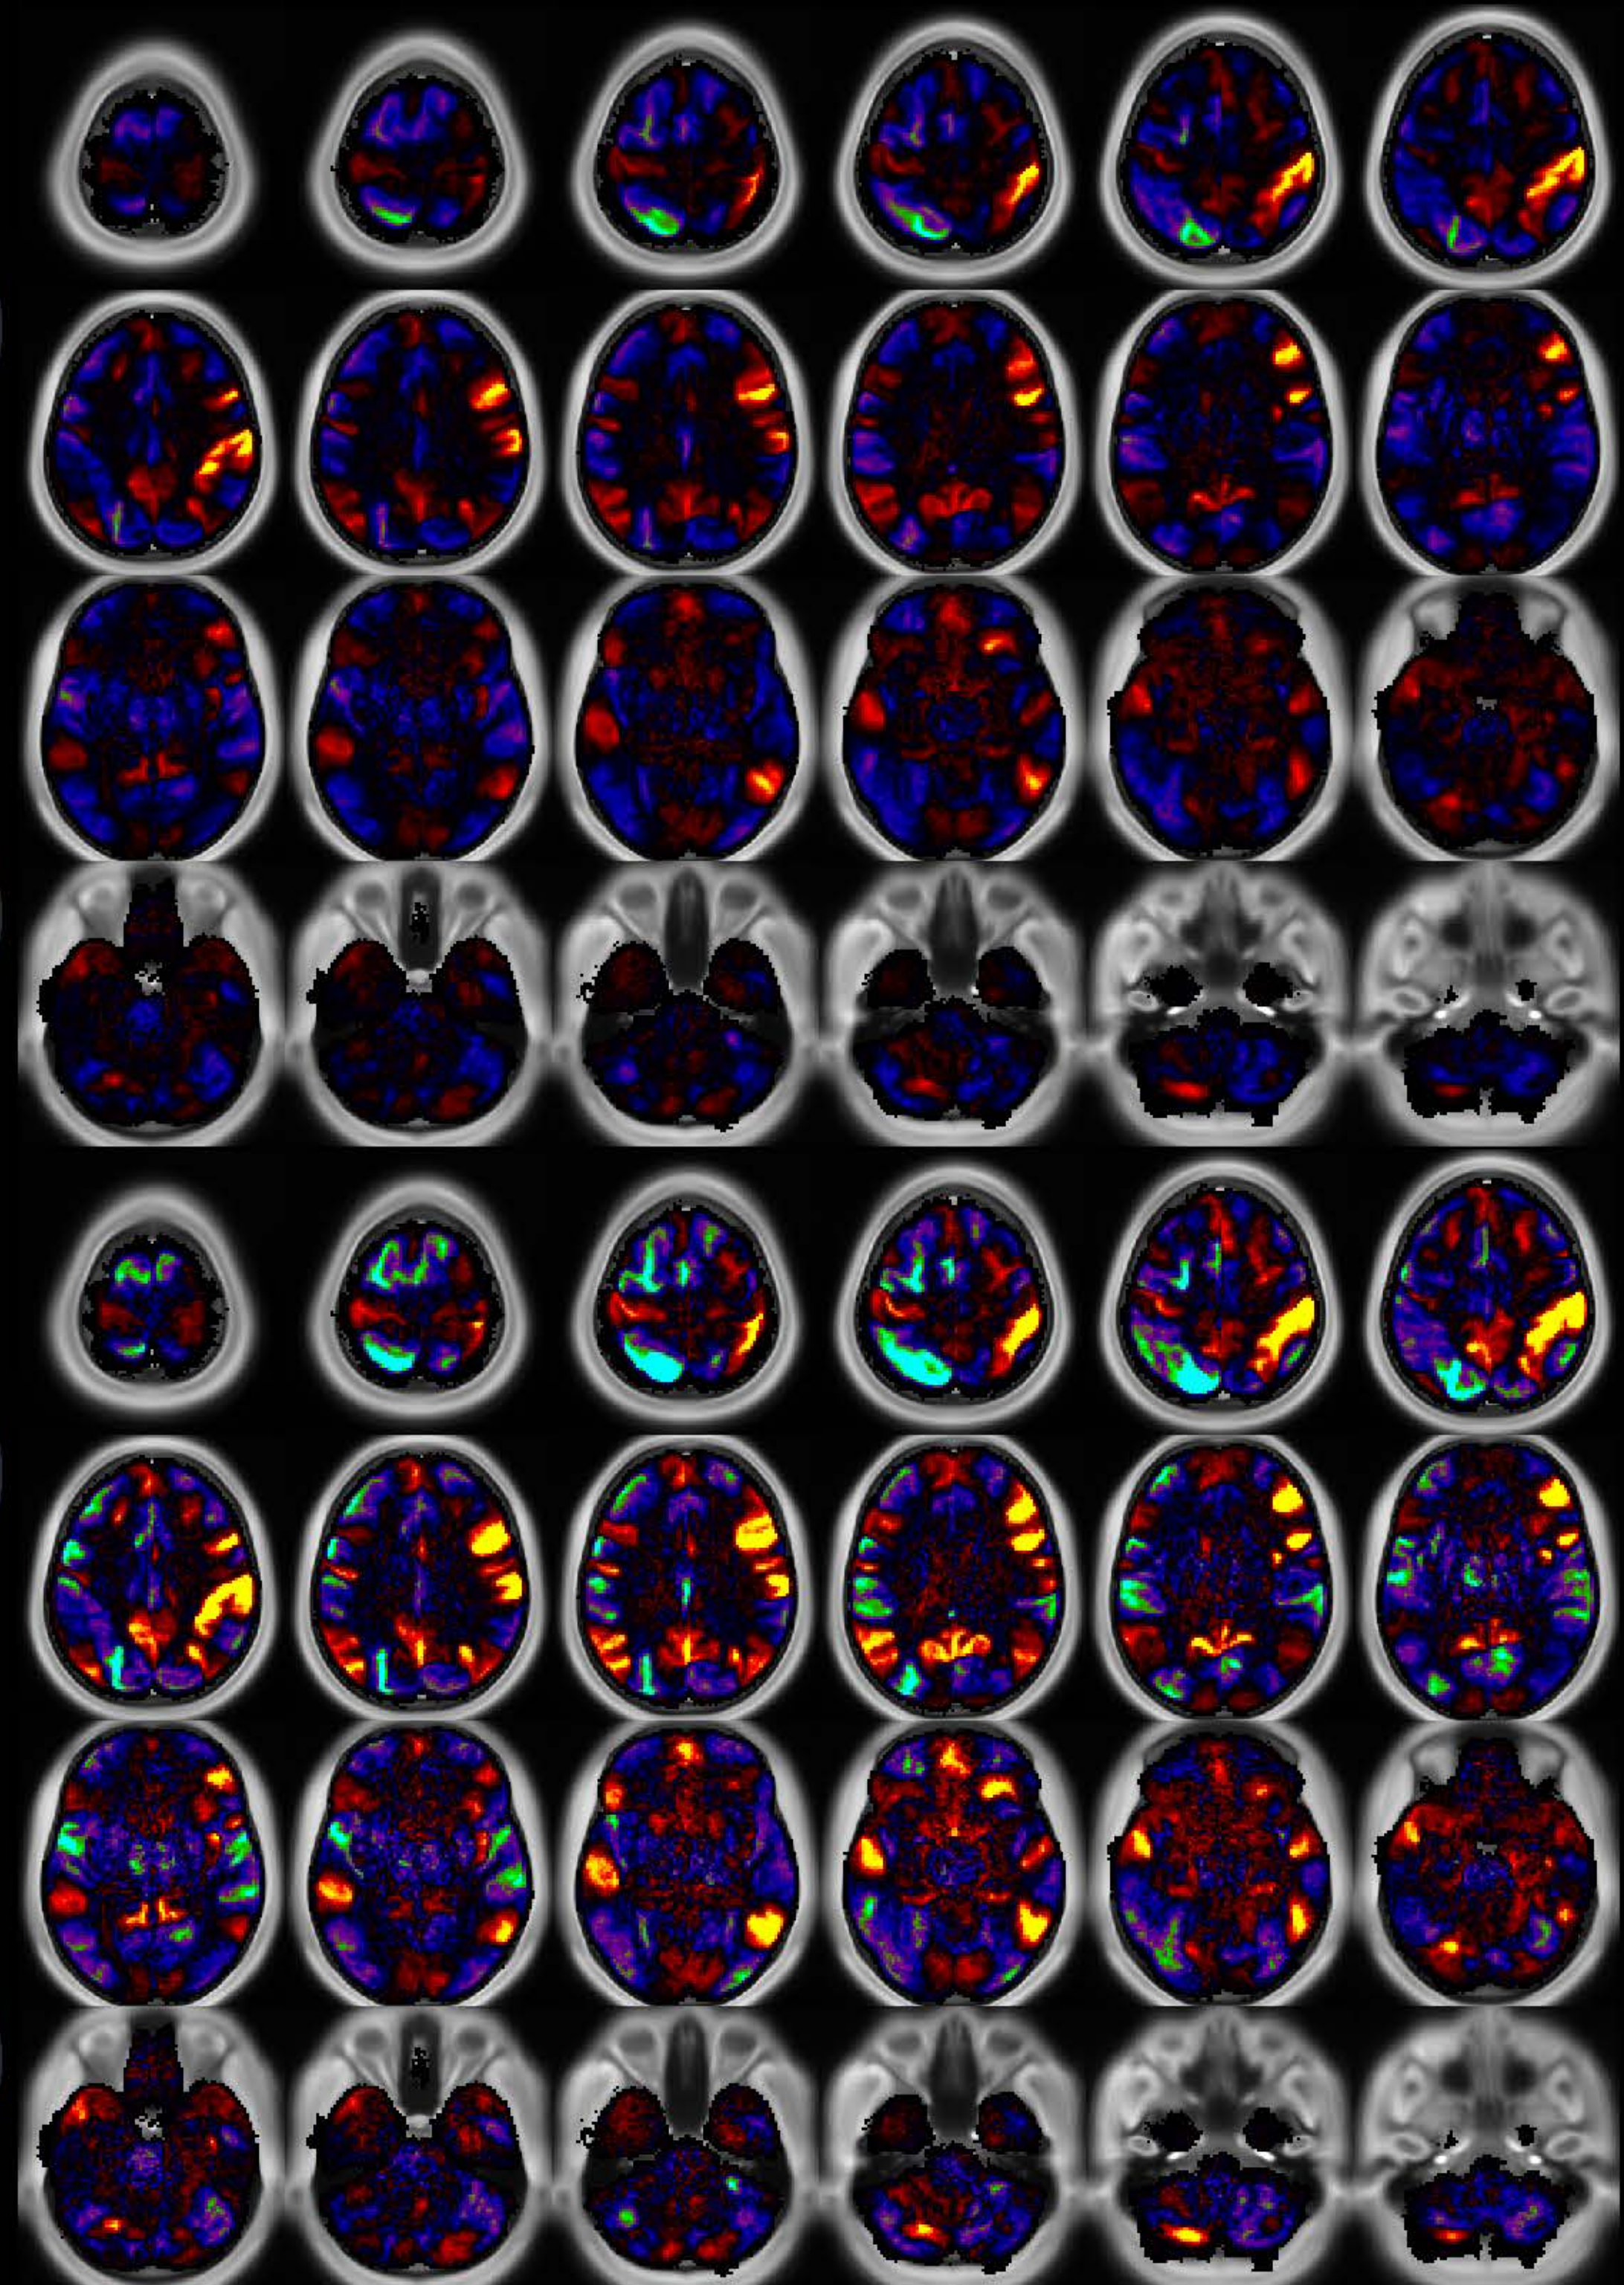

Seconds

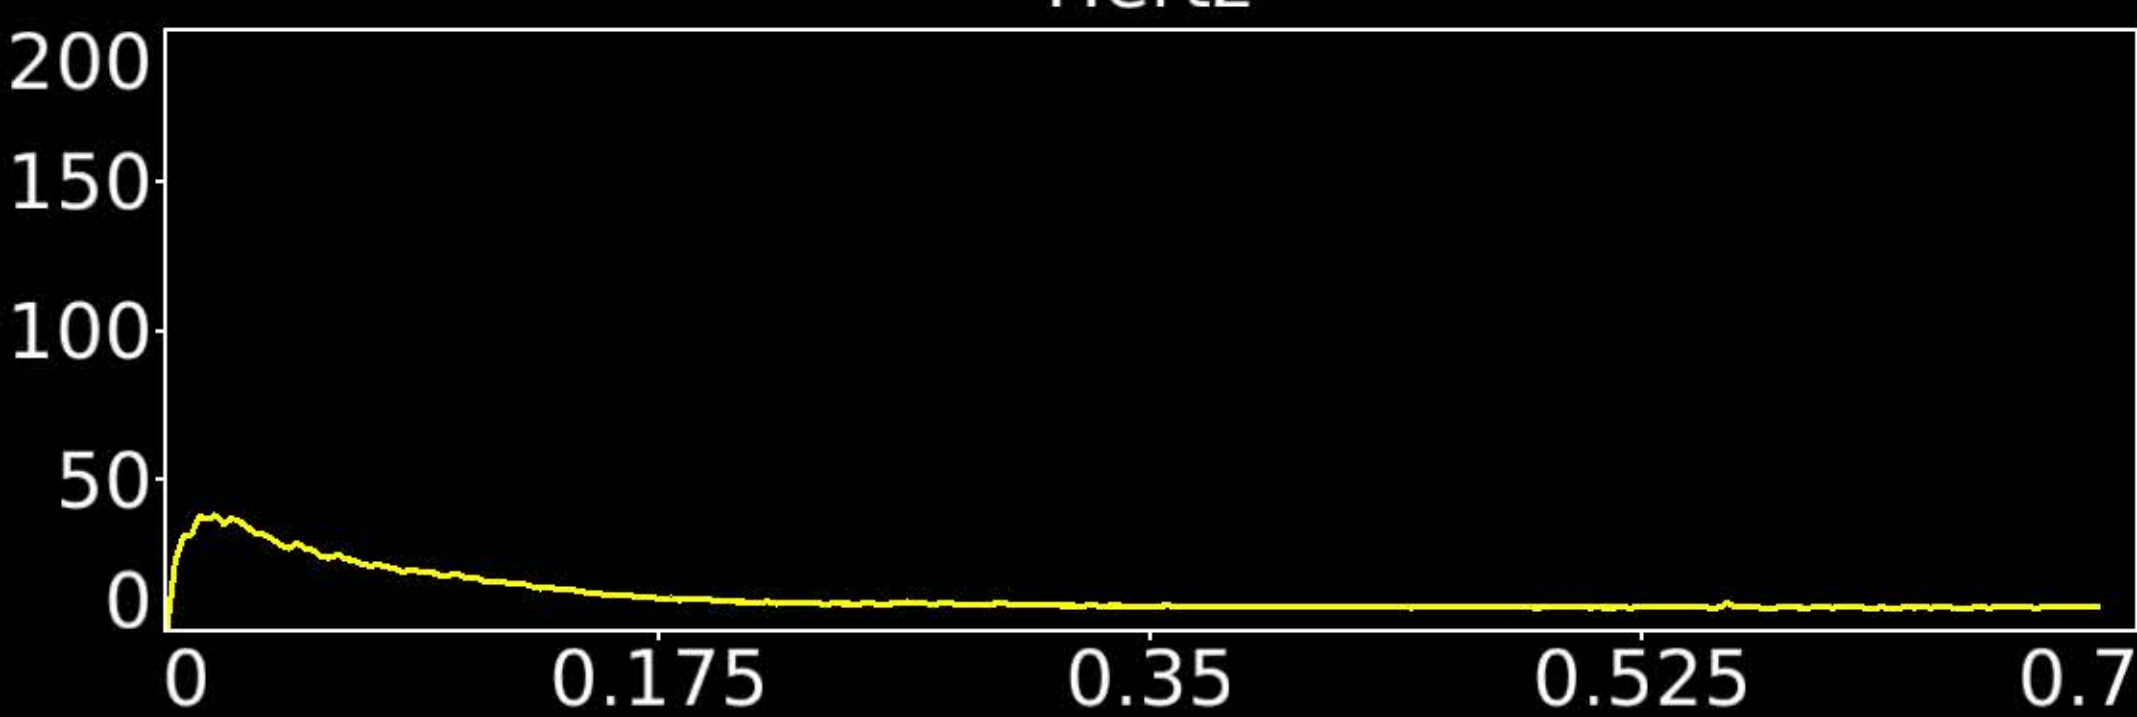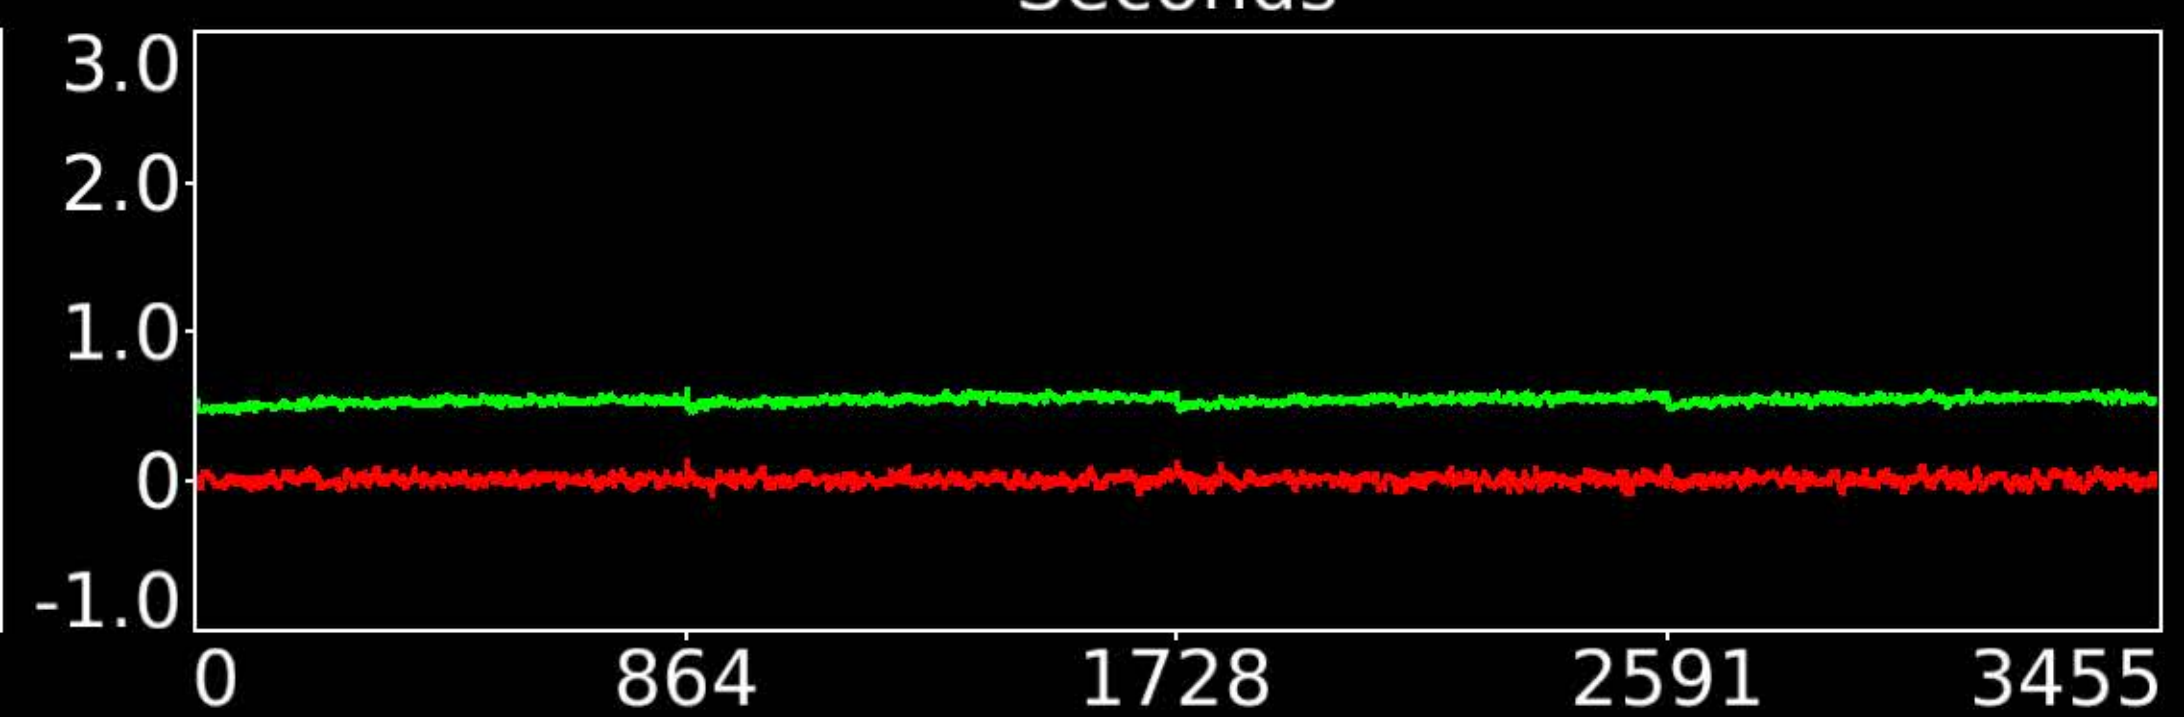

|                           |                            |                            |  |
|---------------------------|----------------------------|----------------------------|--|
| Number & Class: 79 Signal |                            | Name: R Unknown Network    |  |
| RVT Correlated: No        | DVARS Dip Associated: No   | Cross-Subject Variable: No |  |
| Single Subject: No        | % Variance Explained: 0.44 | Globality Index: 0.33      |  |
| Task Component: No        | Taskr Component: No        | Sleep Noted: No            |  |

Rationale: Spatial map includes positive and negative patches that respect known RSNs (e.g. Dorsal Attention Network)



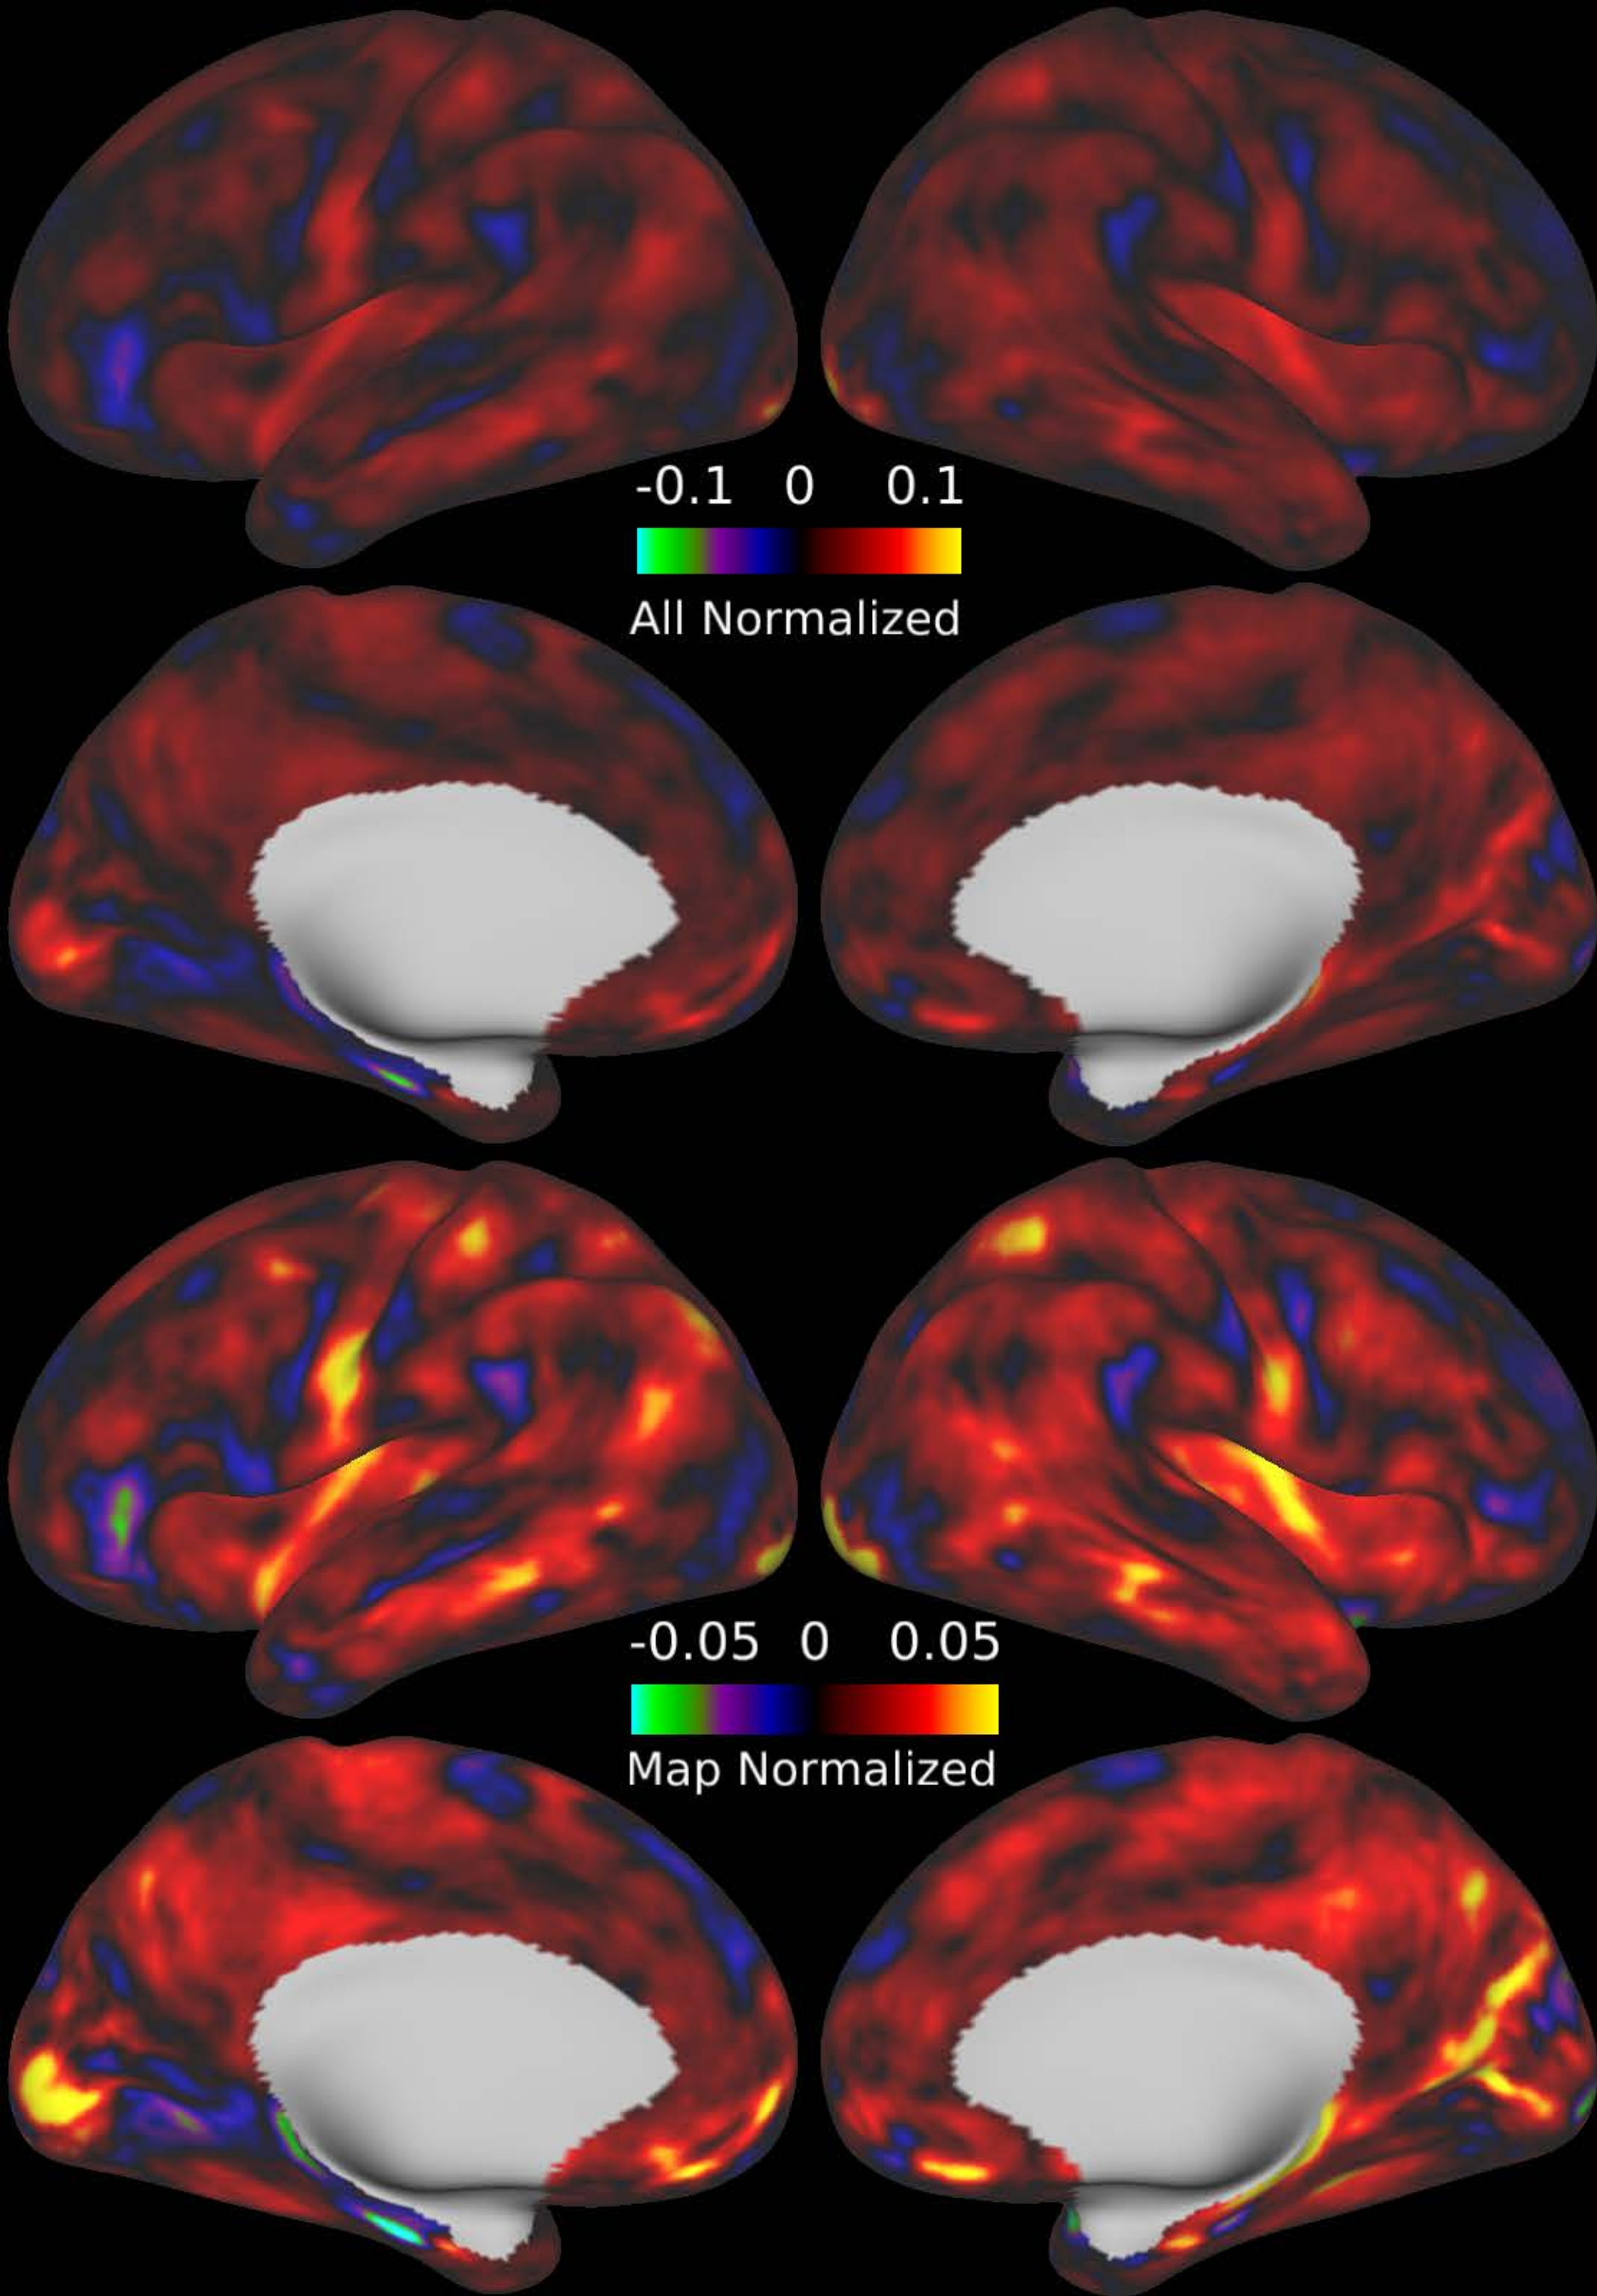

Hertz

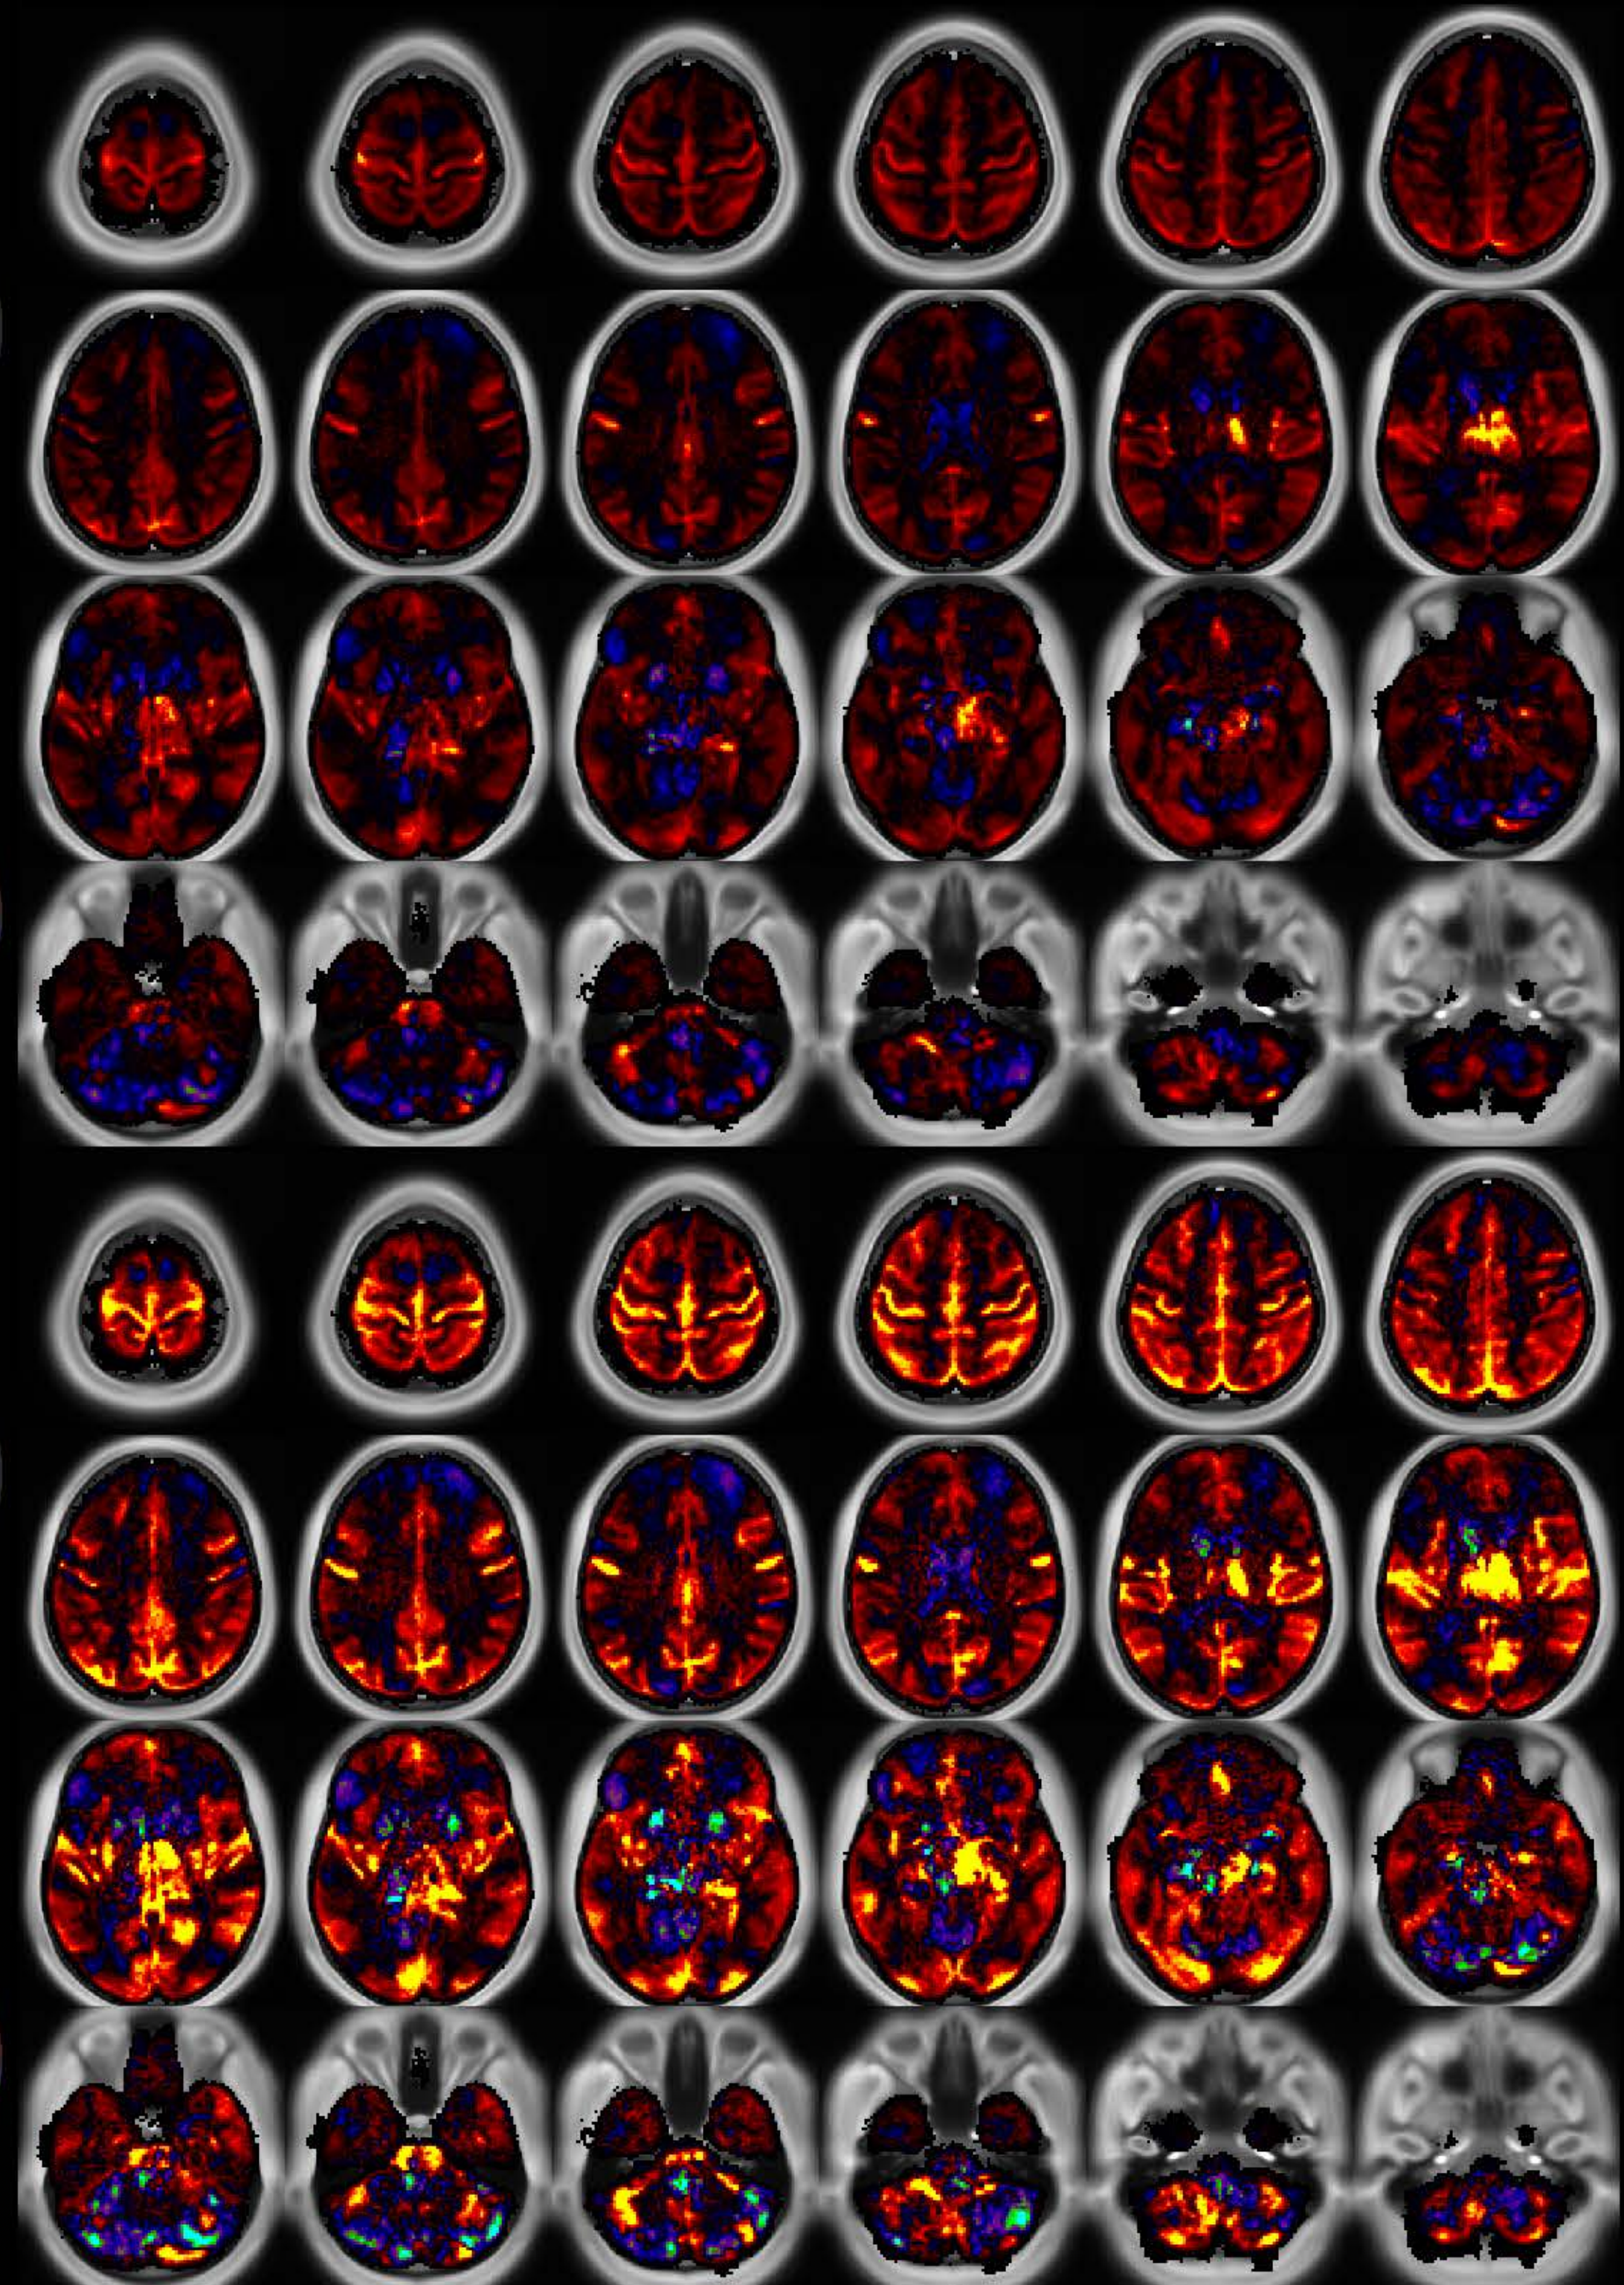

Seconds

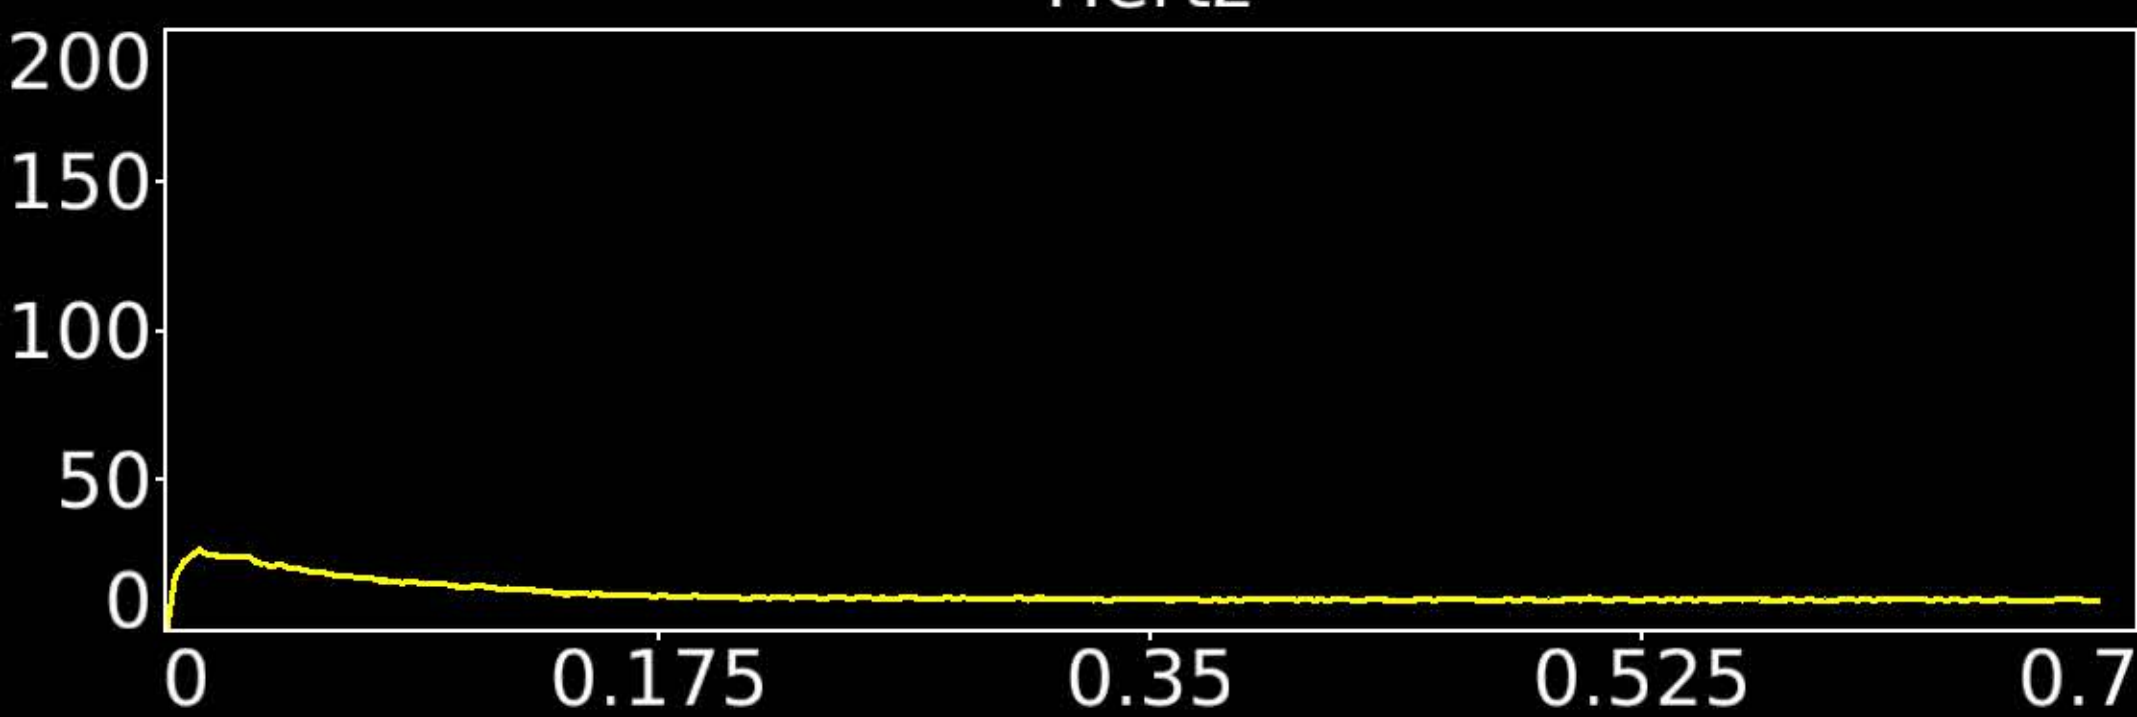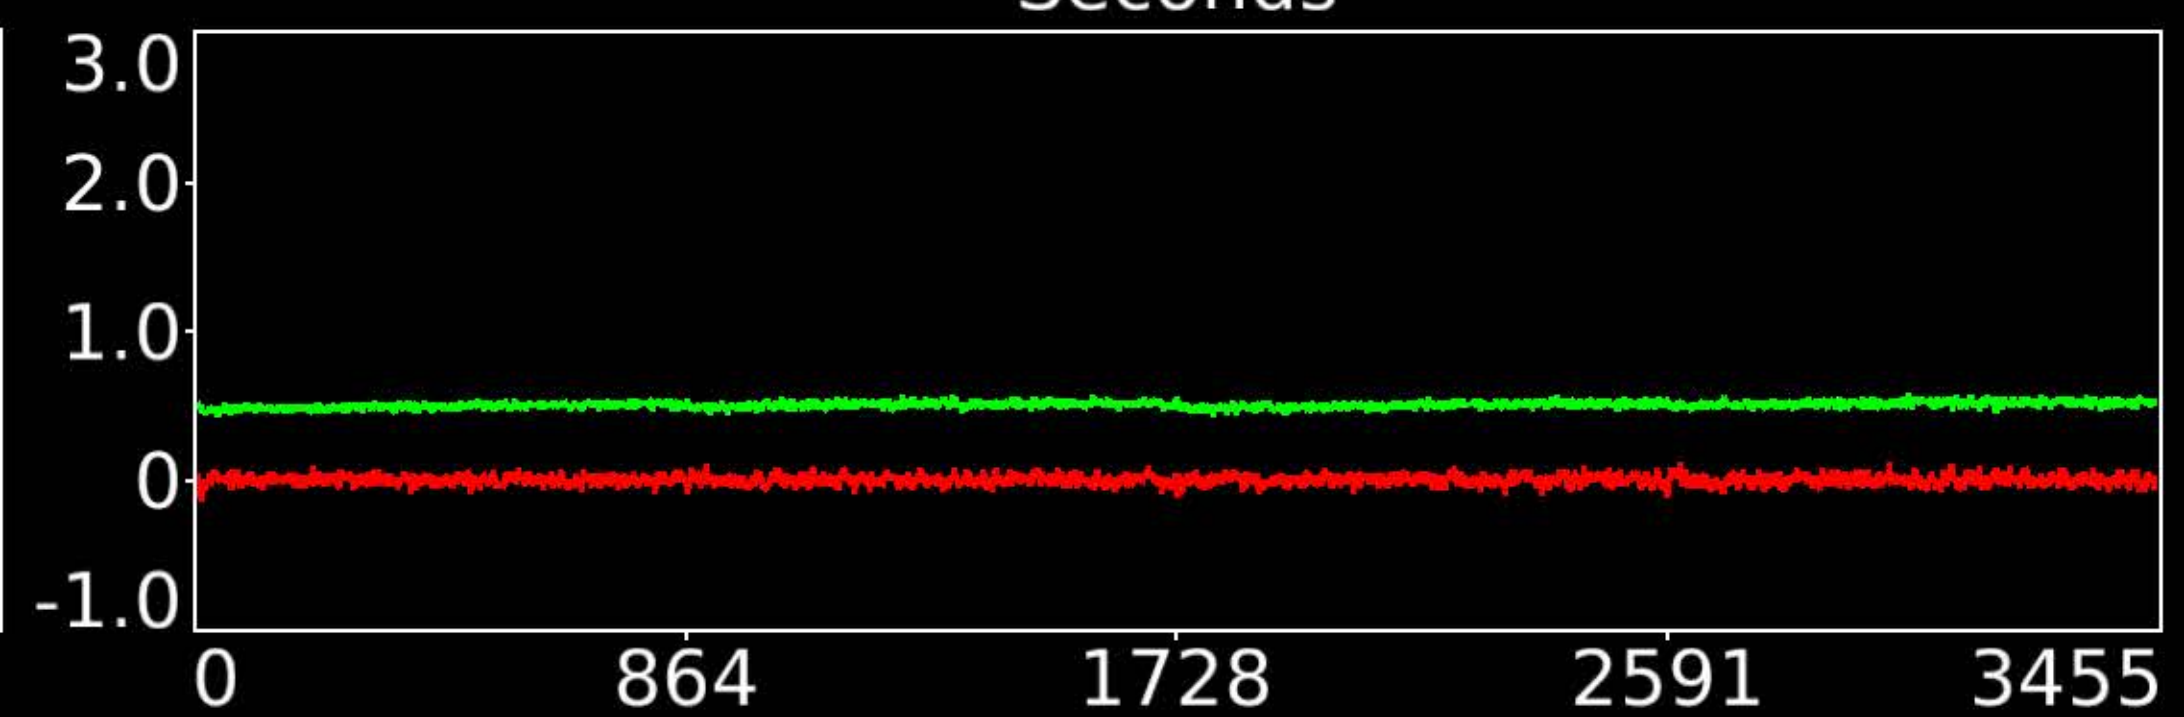

Number & Class: 80 Noise

Name: Subsidiary Global Physiological Noise

RVT Correlated: No

DVARS Dip Associated: No

Cross-Subject Variable: Yes

Single Subject: Yes

% Variance Explained: 0.42

Globality Index: 1.52

Task Component: No

Taskr Component: No

Sleep Noted: Yes

Rationale: Single subject component with high correlation to global timecourse



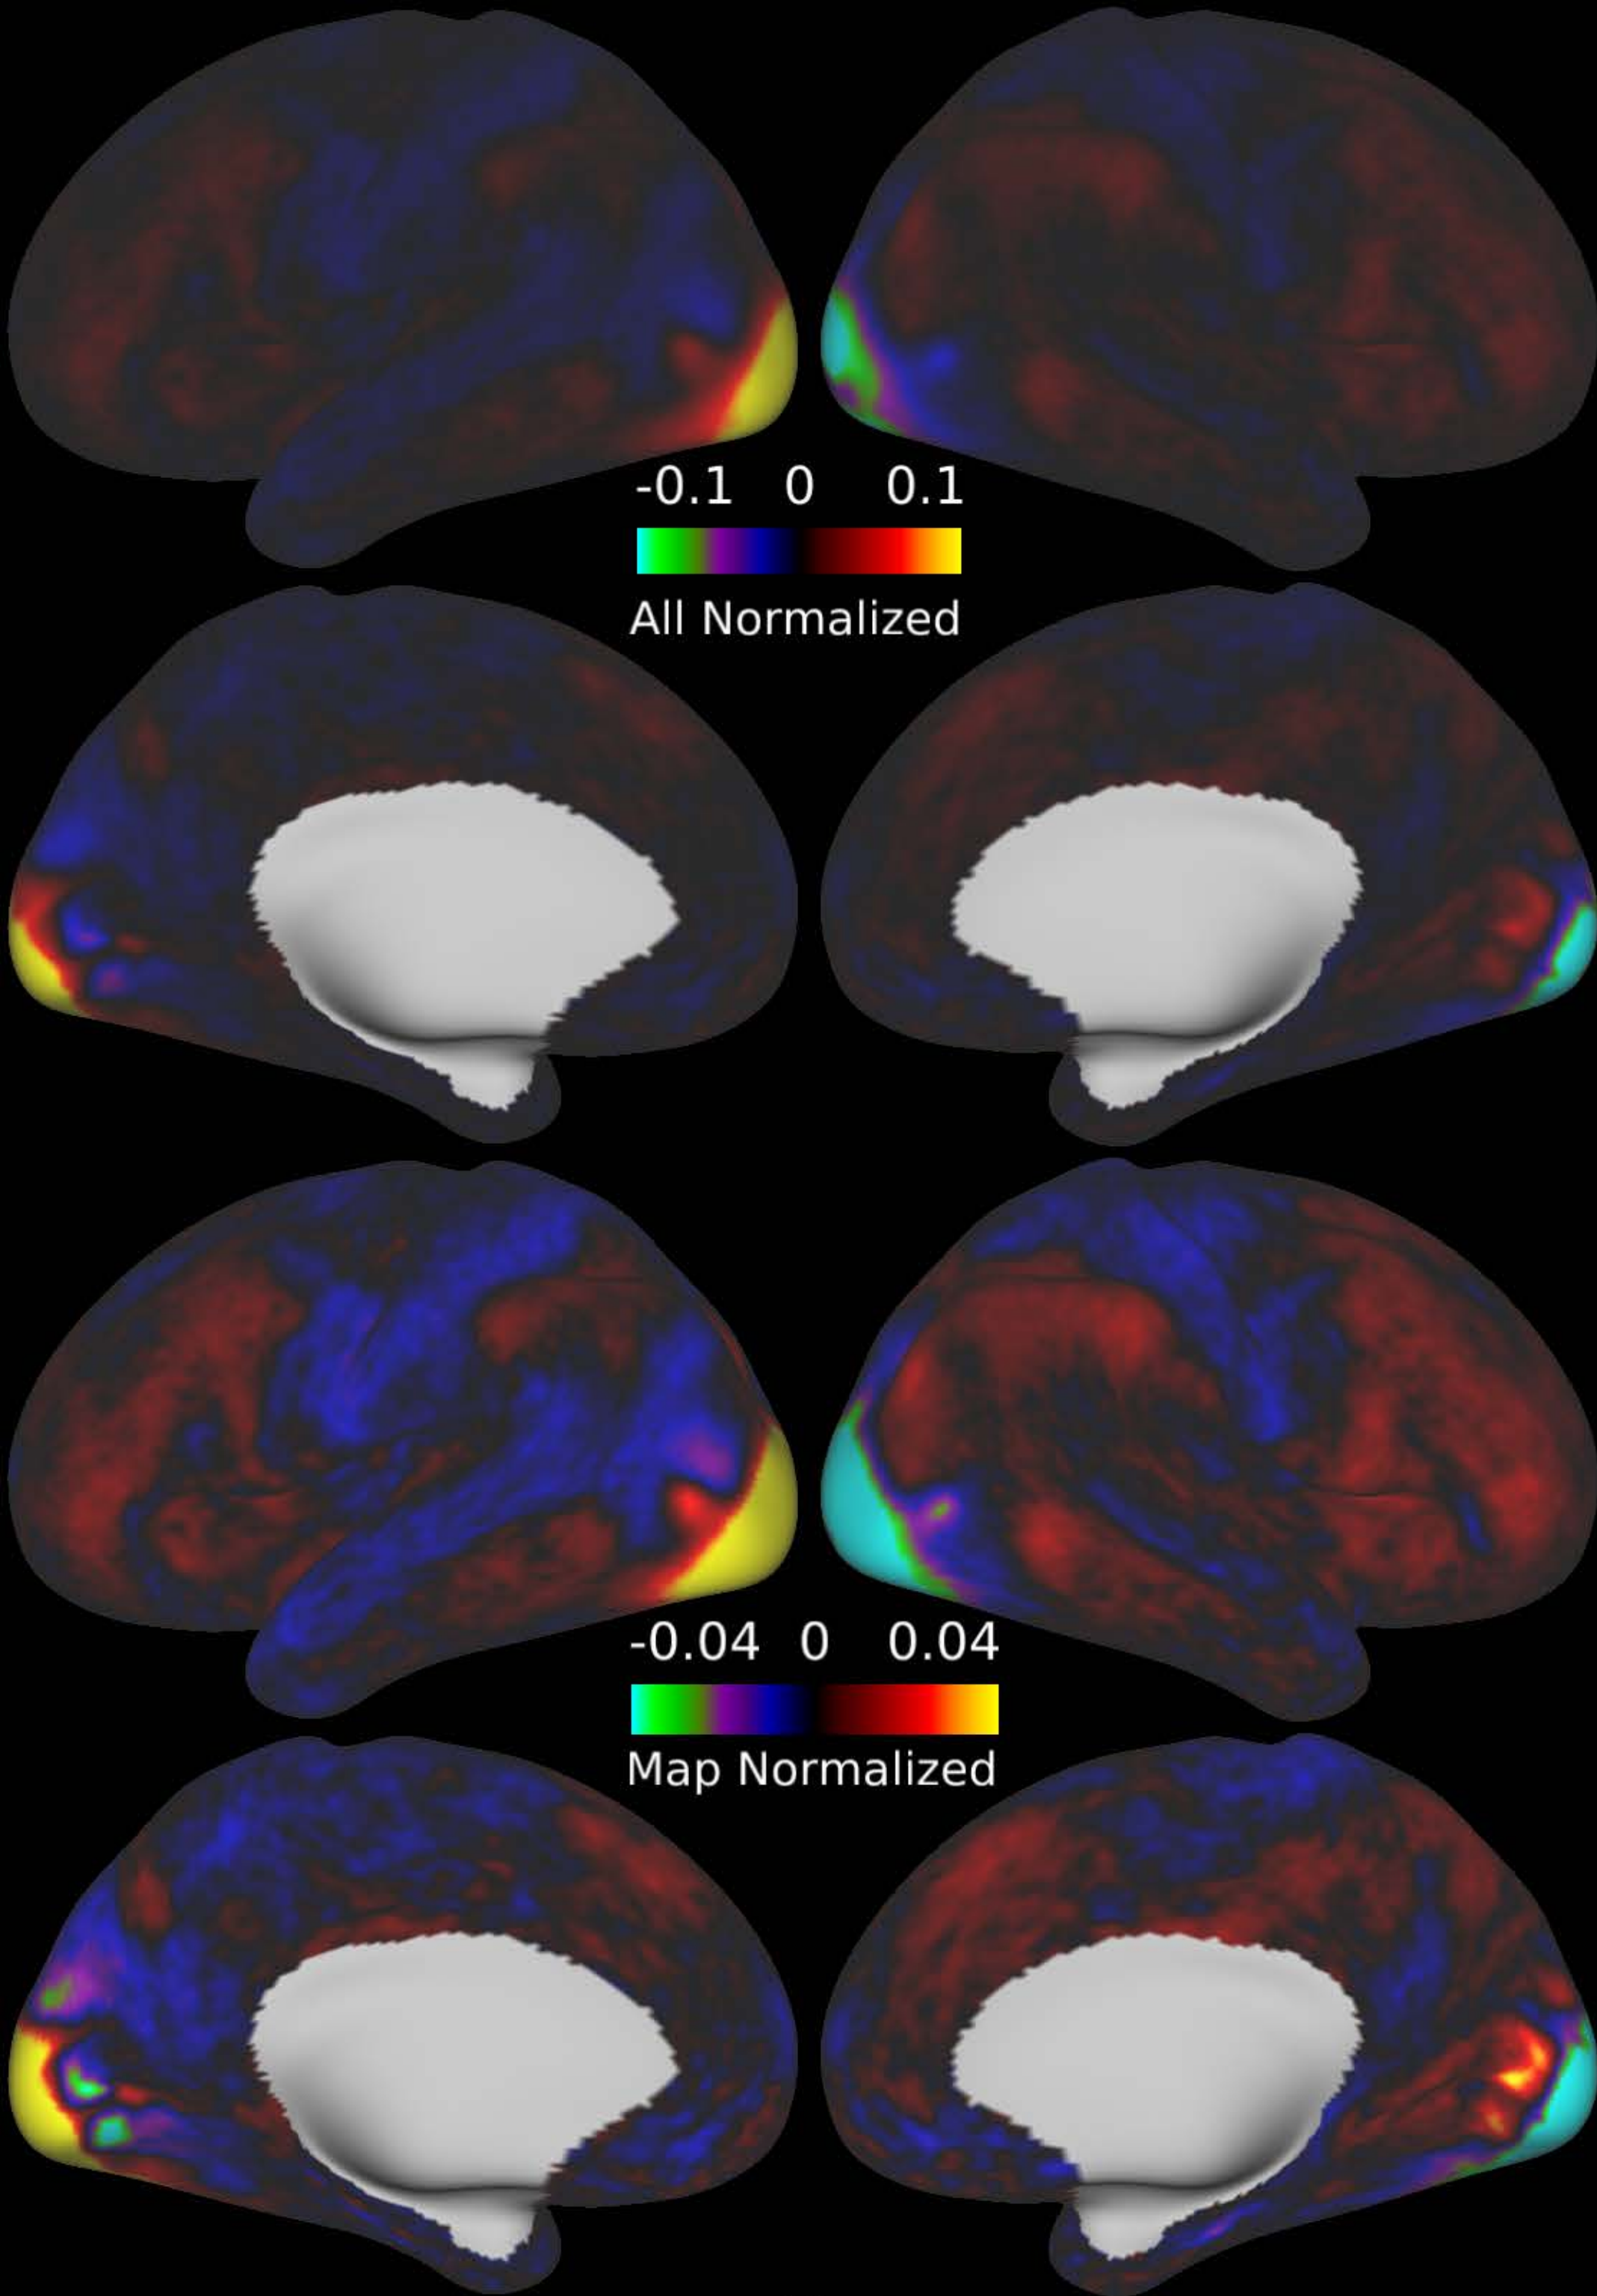

Hertz

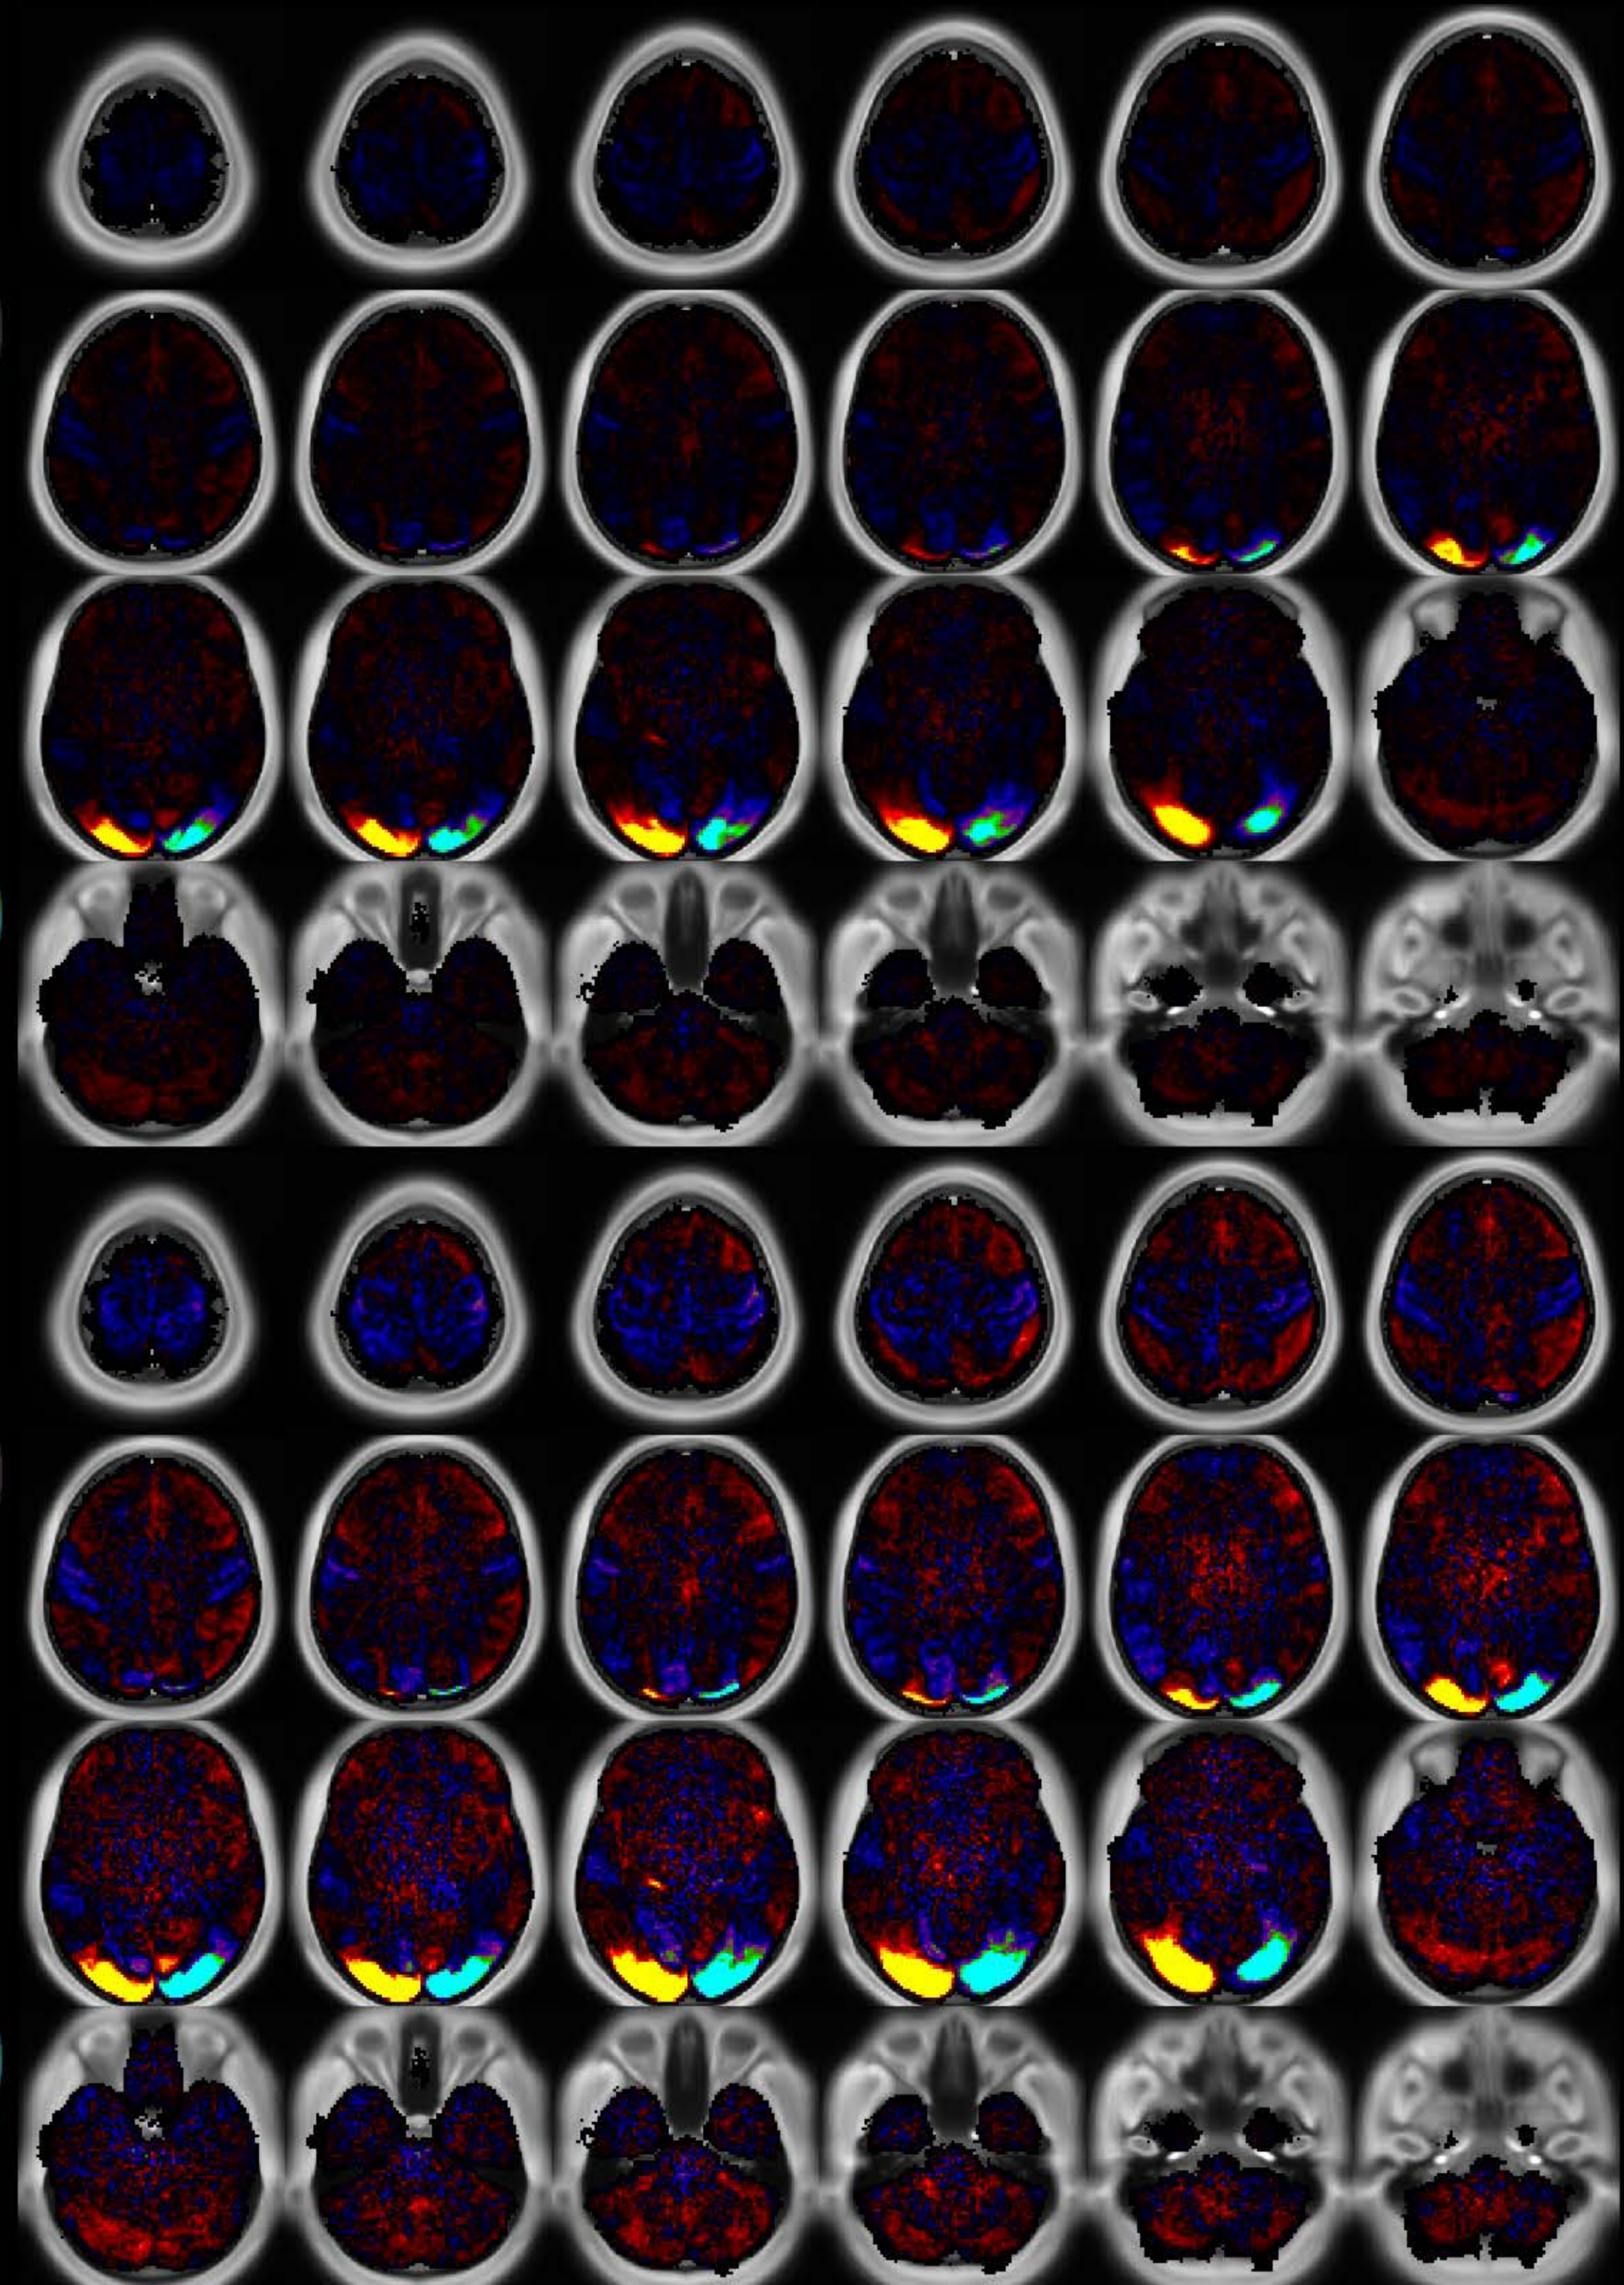

Seconds

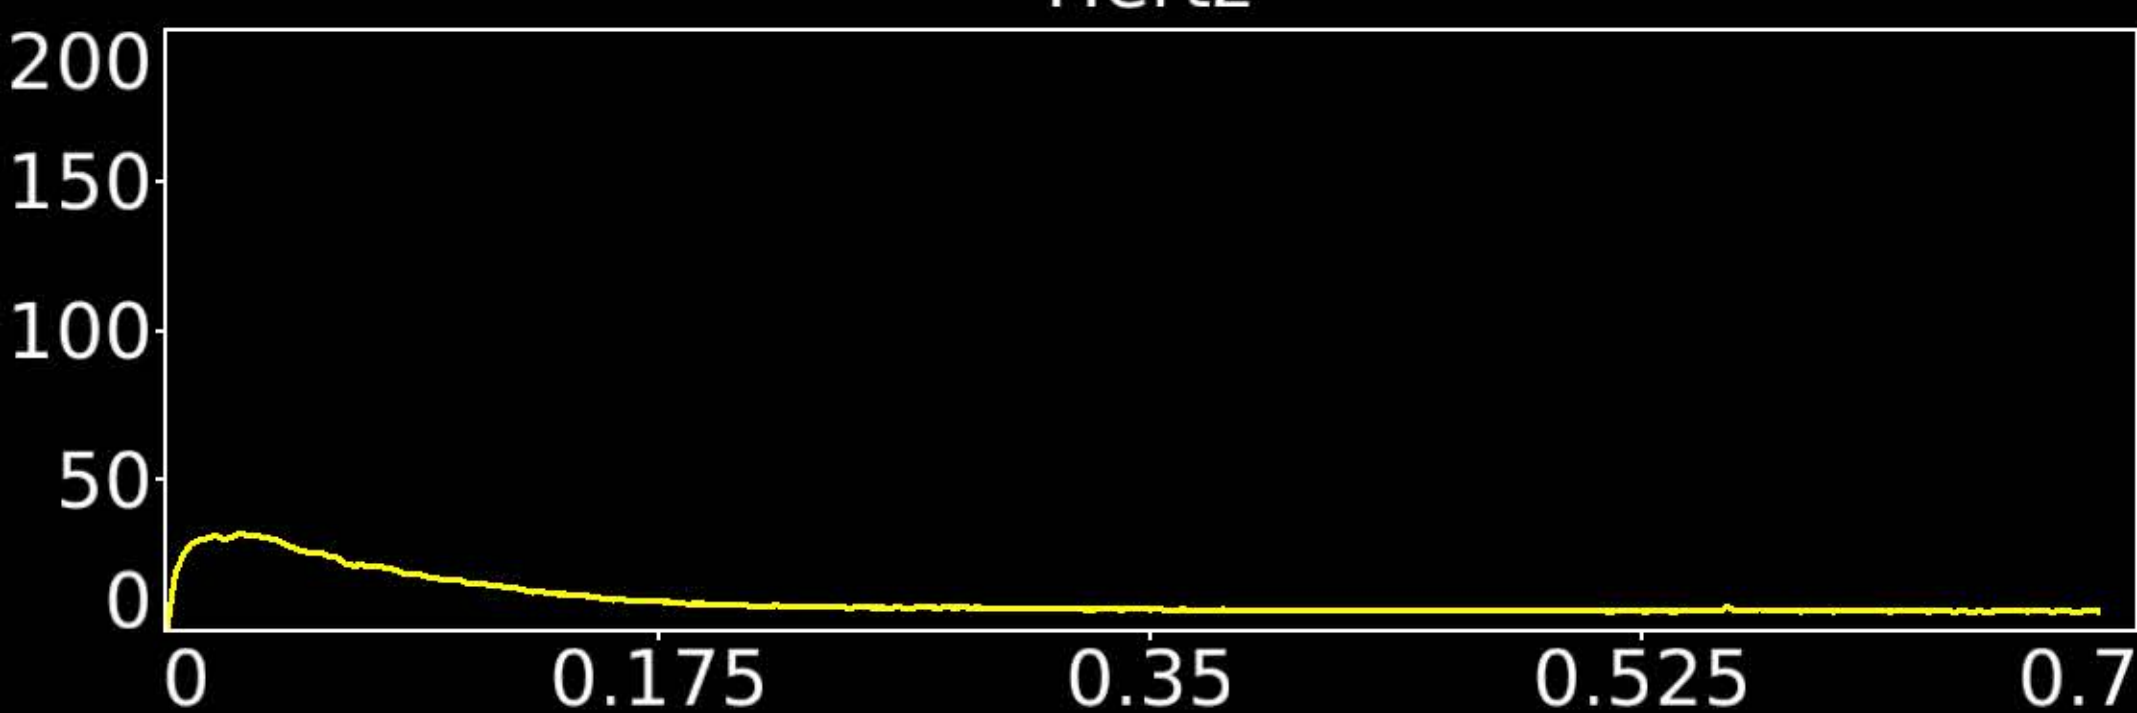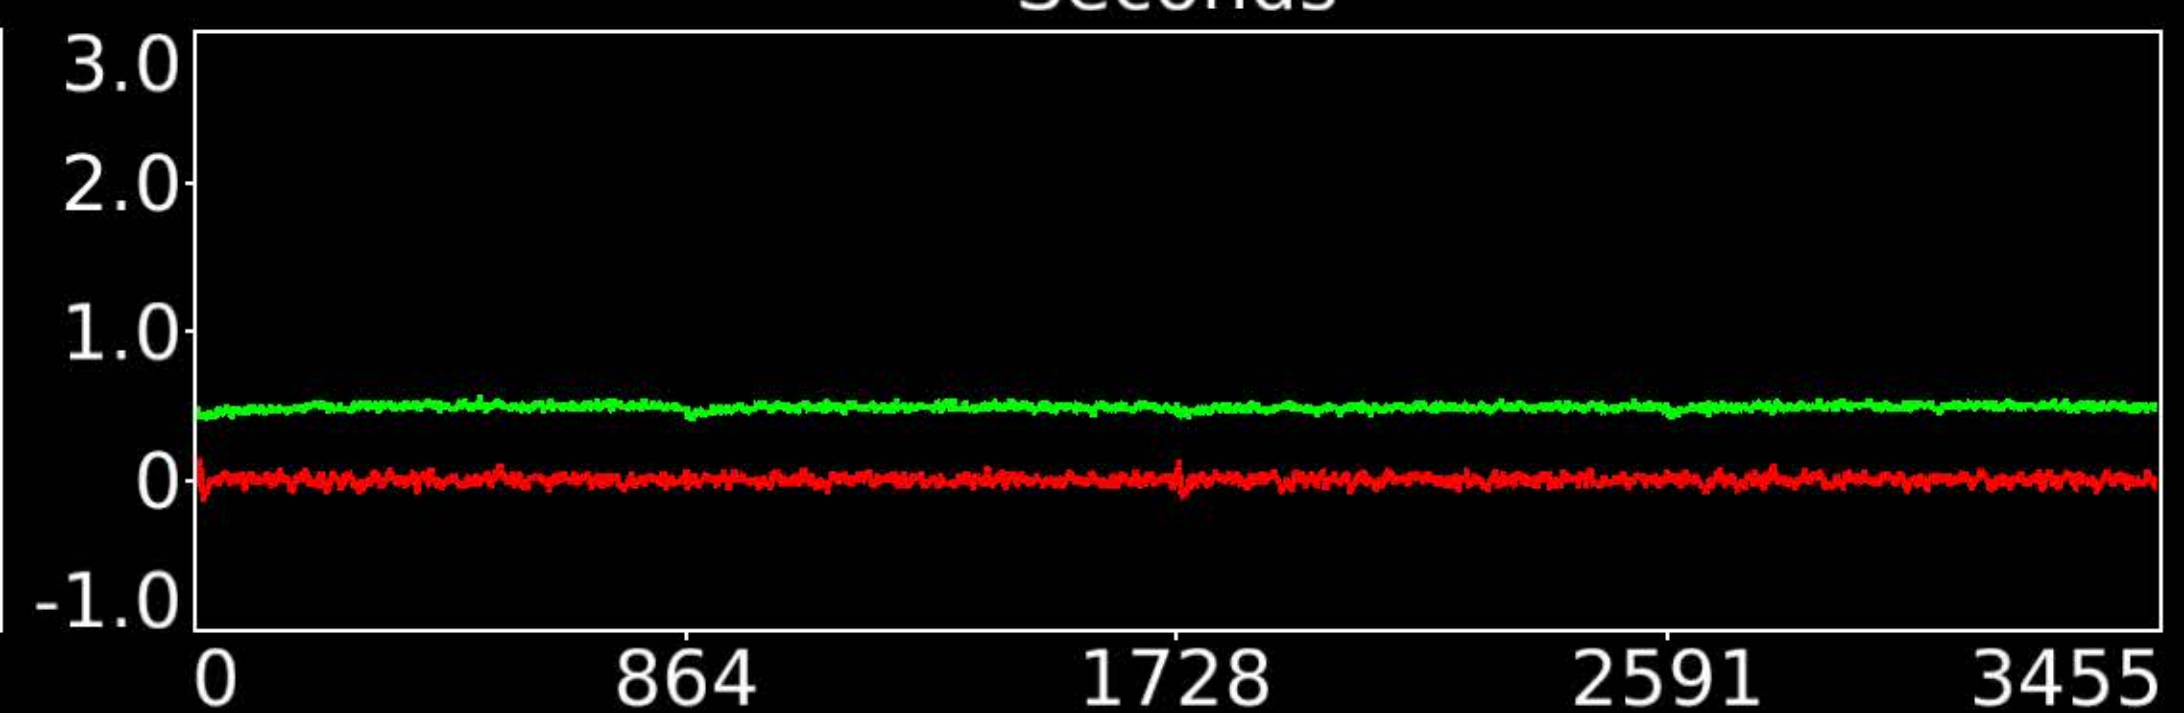

|                           |                            |                                       |  |
|---------------------------|----------------------------|---------------------------------------|--|
| Number & Class: 81 Signal |                            | Name: Visuotopic: Foveal Left > Right |  |
| RVT Correlated: No        | DVARS Dip Associated: No   | Cross-Subject Variable: No            |  |
| Single Subject: No        | % Variance Explained: 0.37 | Globality Index: 0.29                 |  |
| Task Component: 70        | Taskr Component: 58        | Sleep Noted: No                       |  |

Rationale: Spatial map includes positive and negative patches that respect known retinotopic visual organization (Foveal Right vs Left)



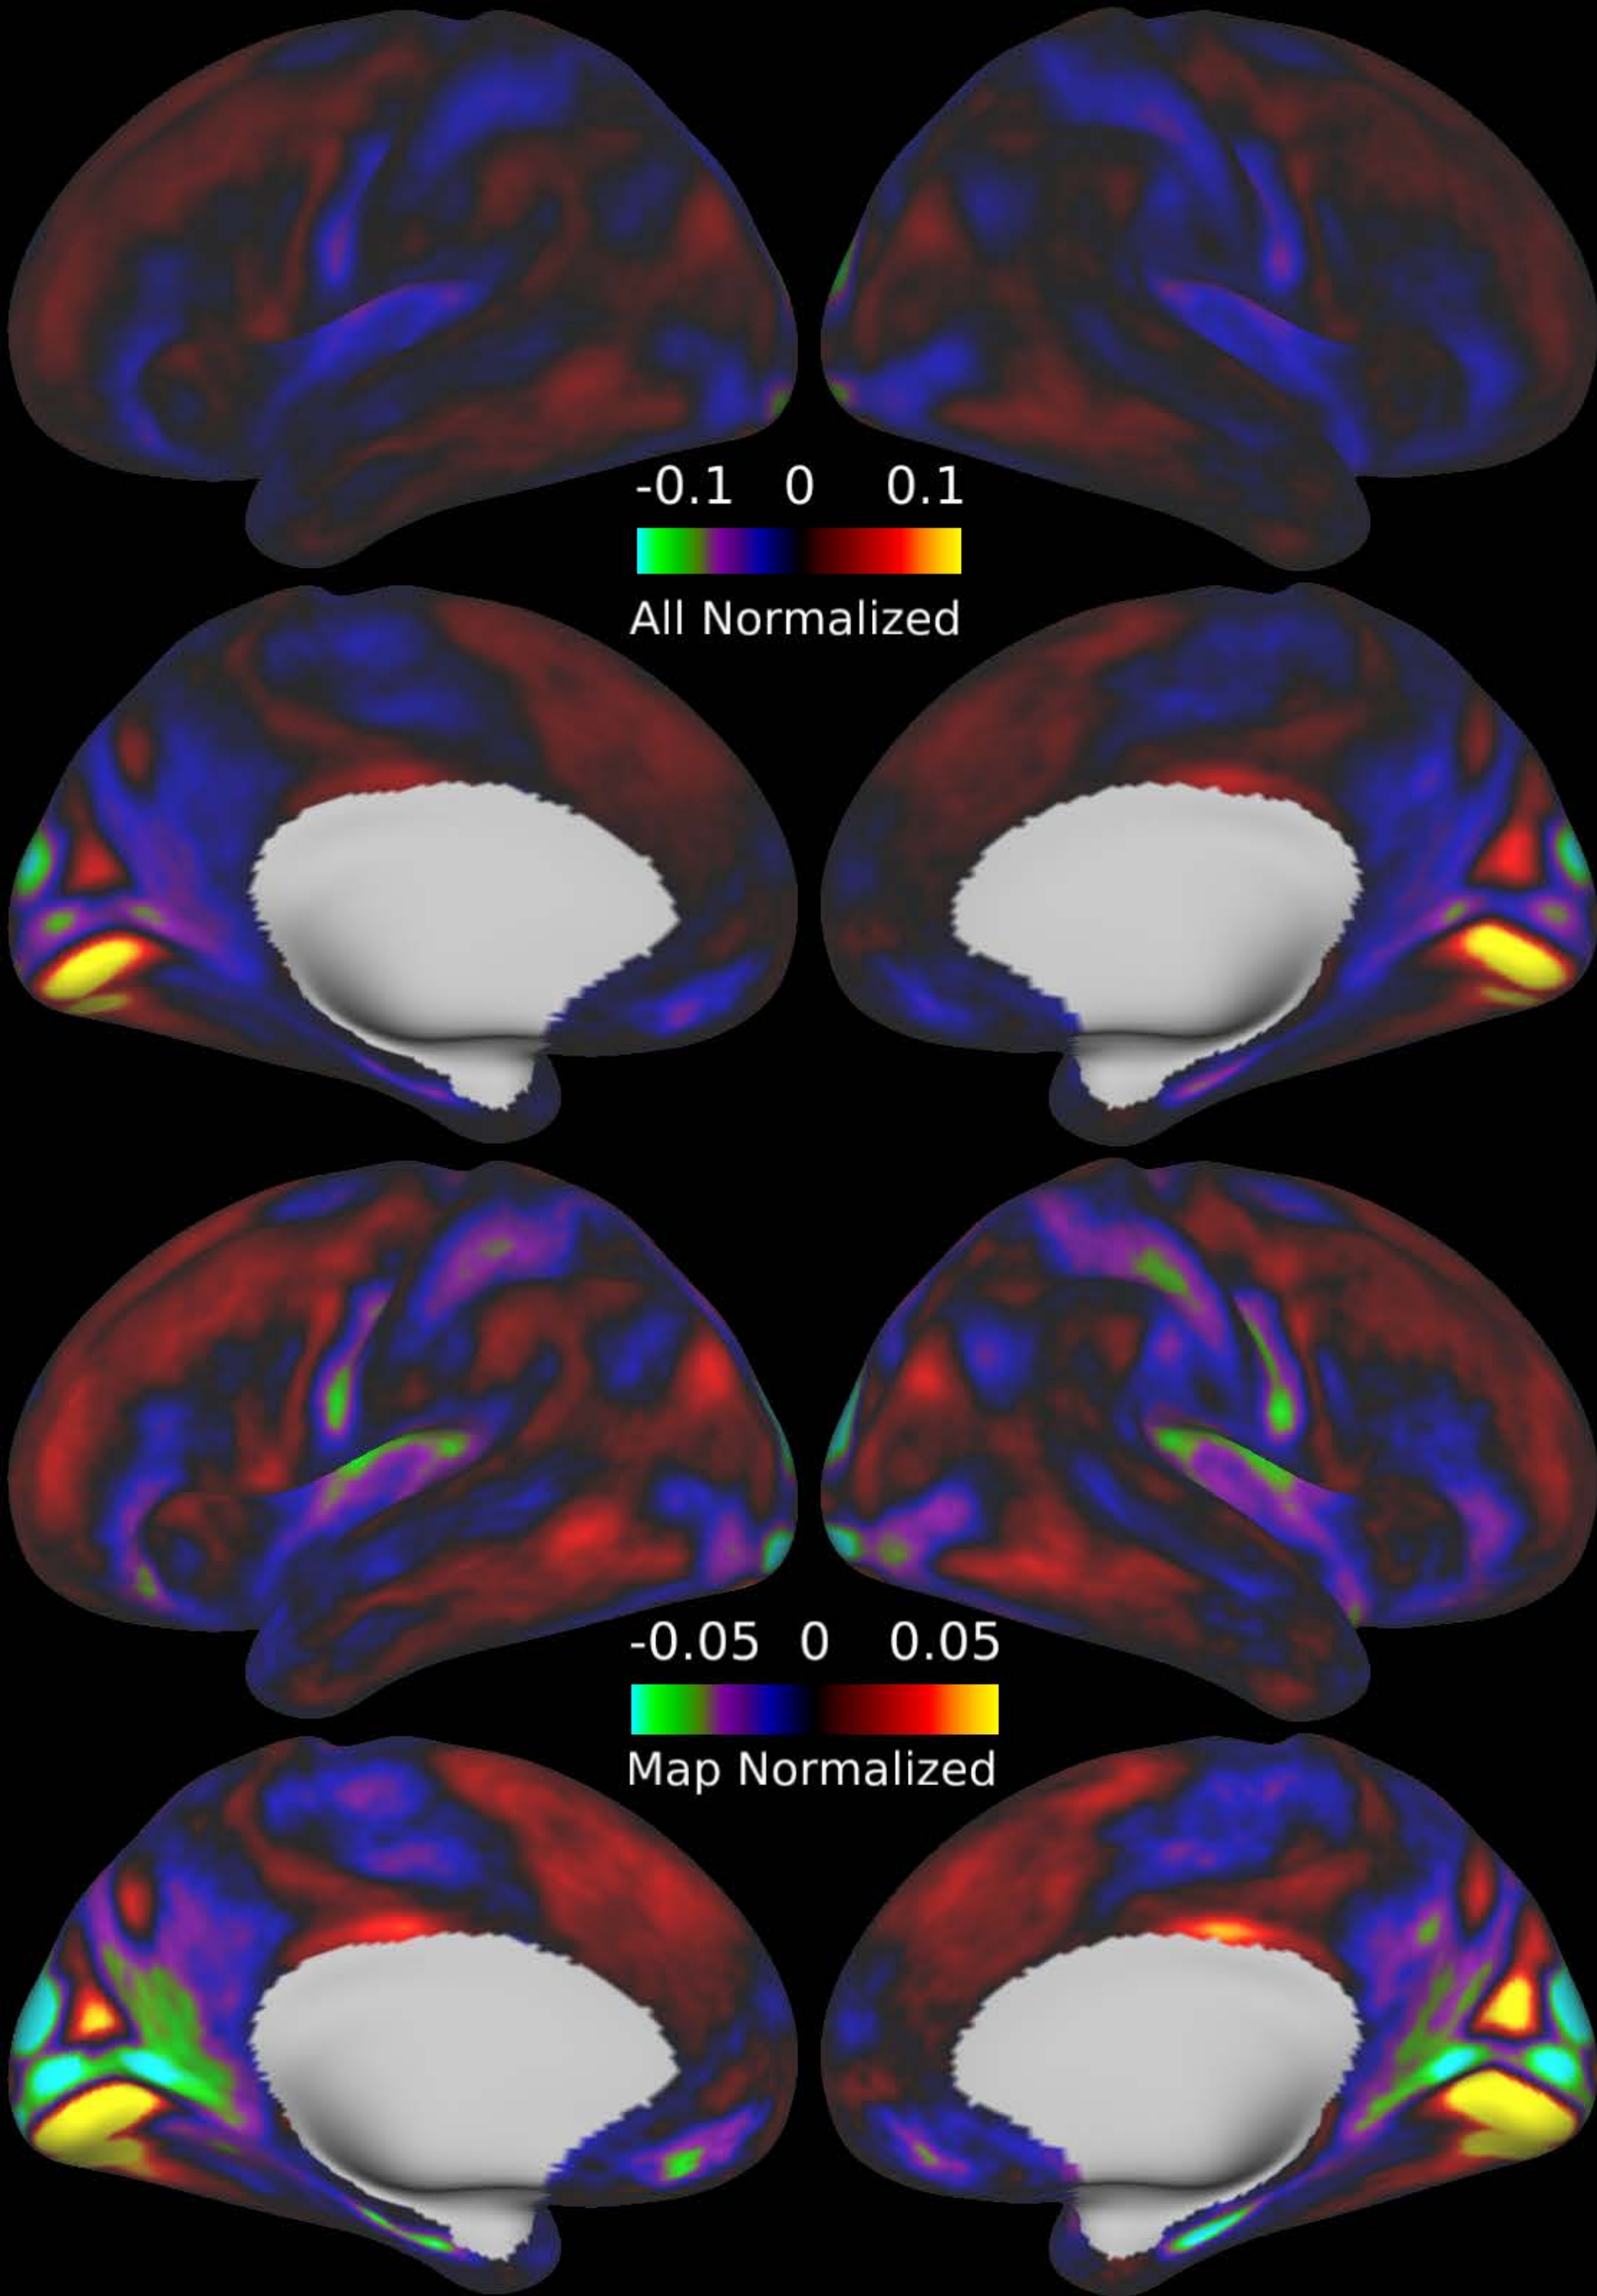

Hertz

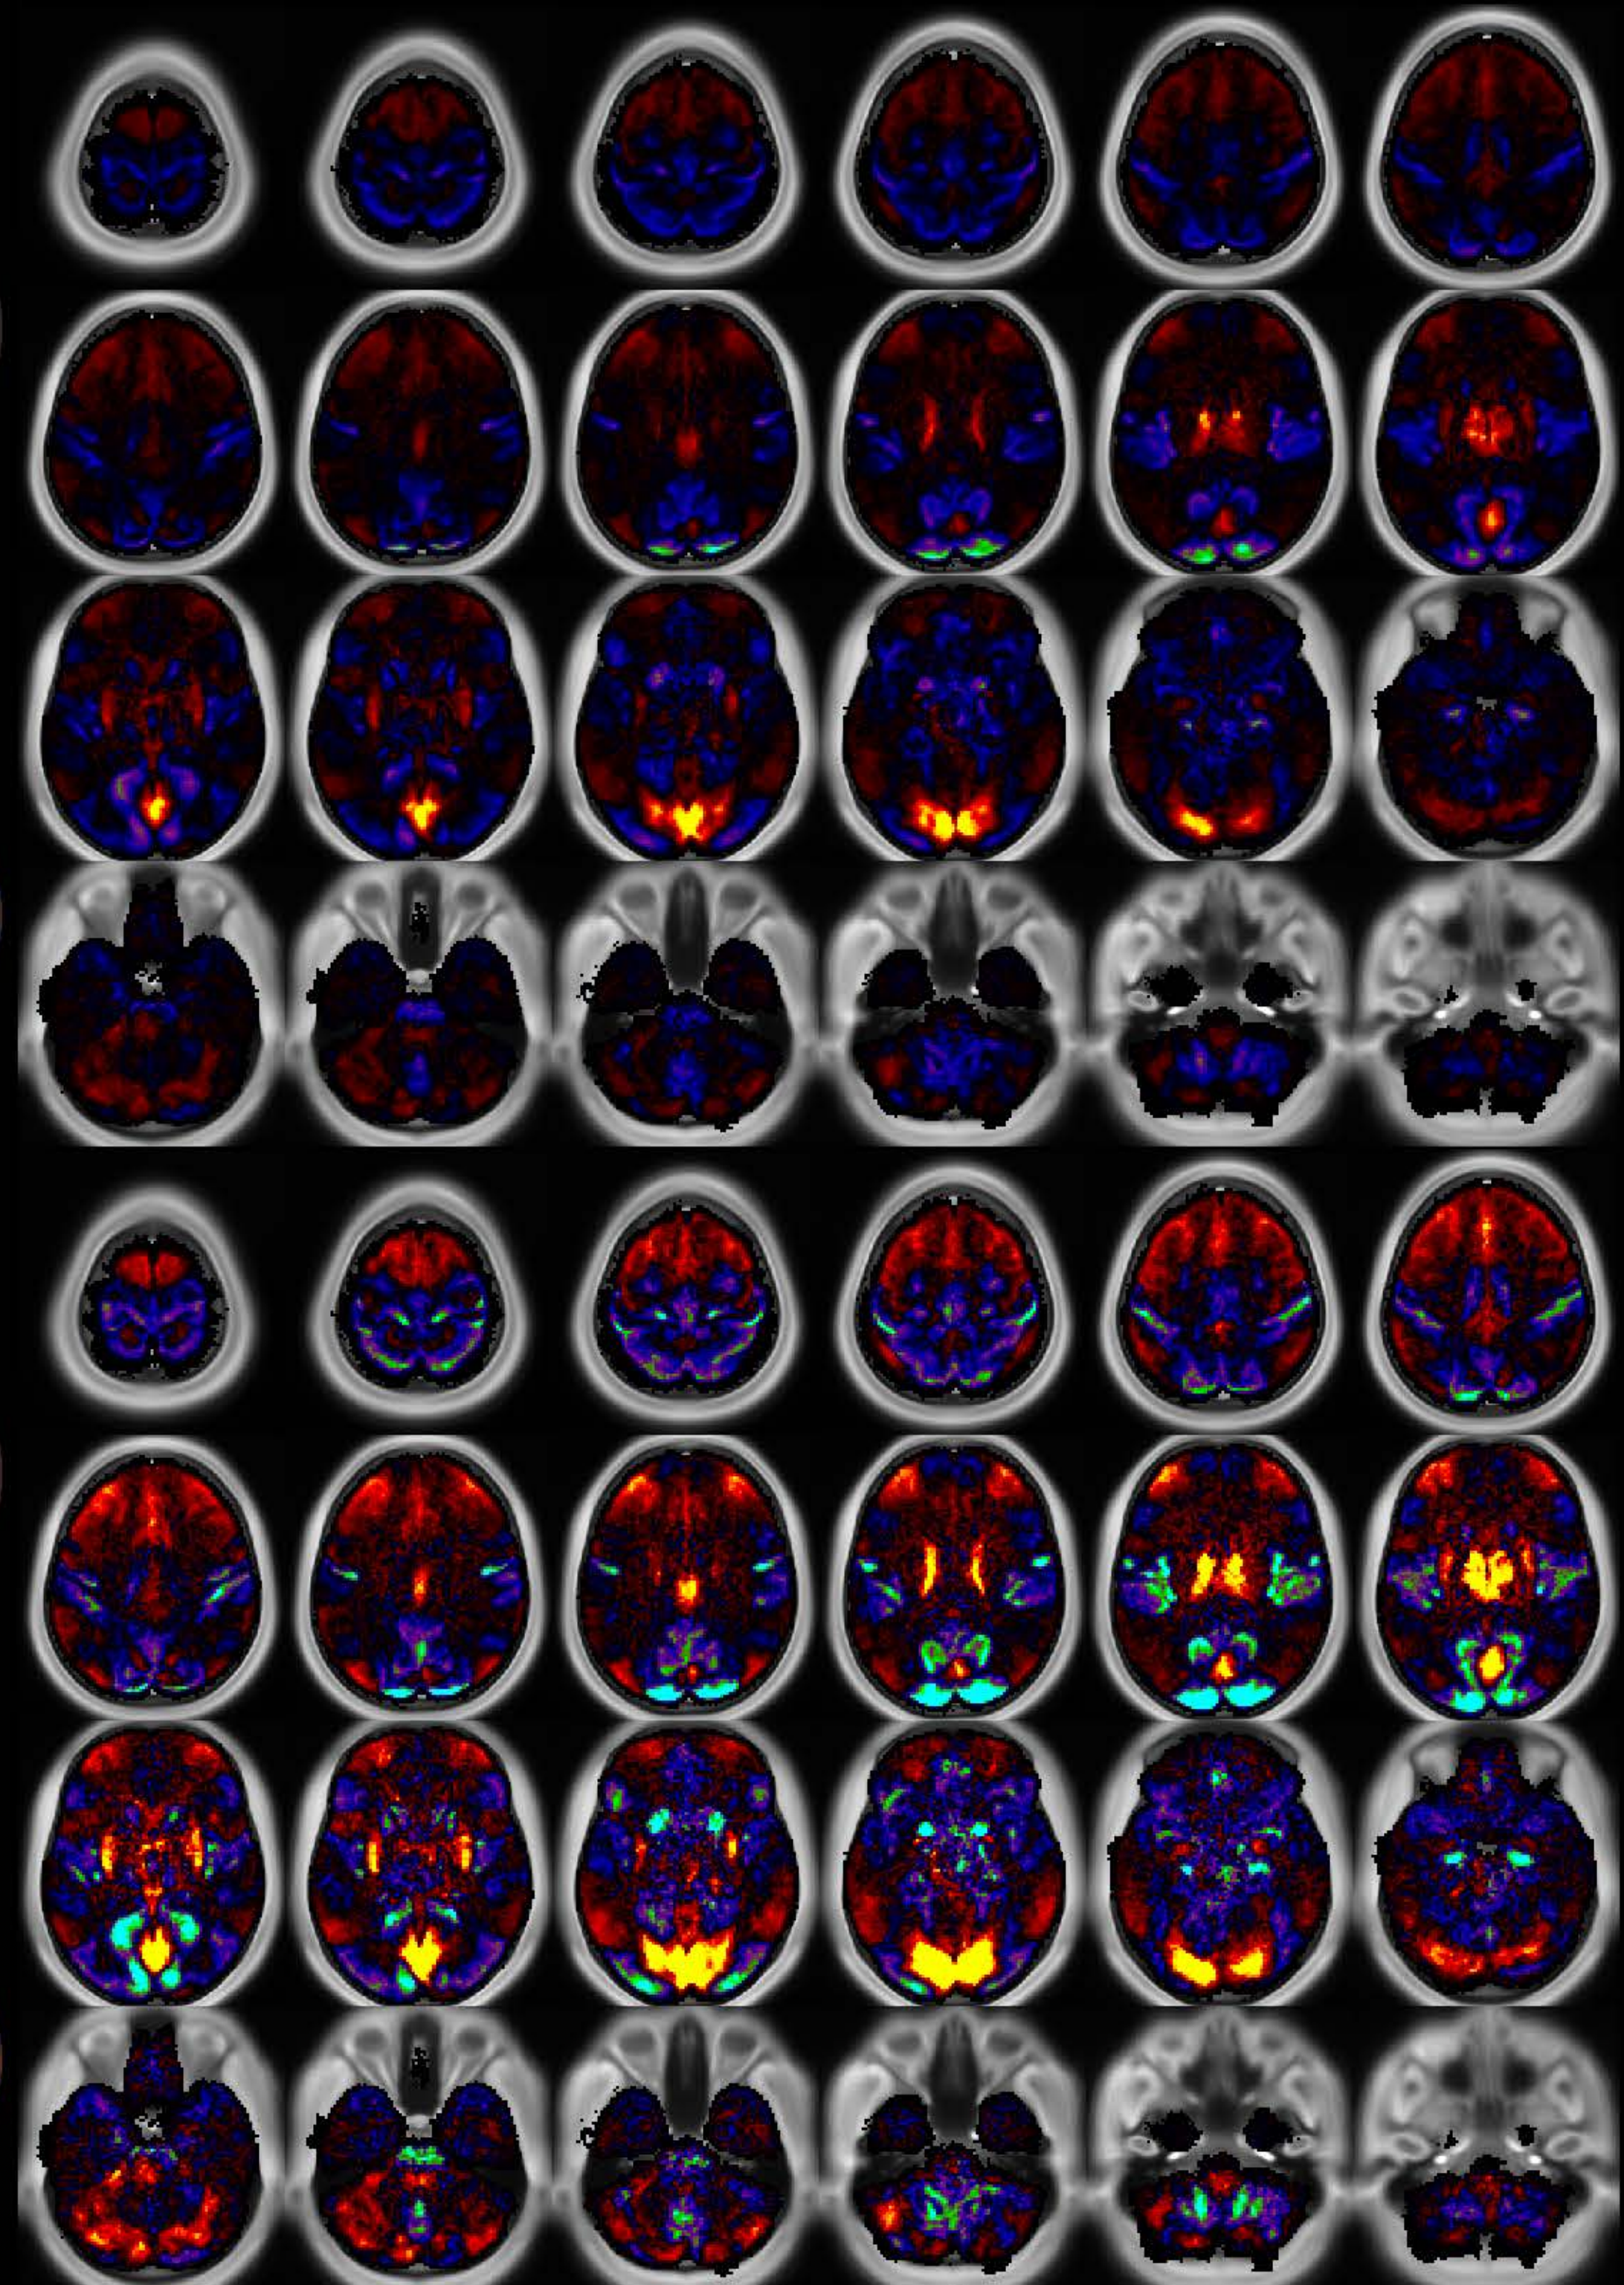

Seconds

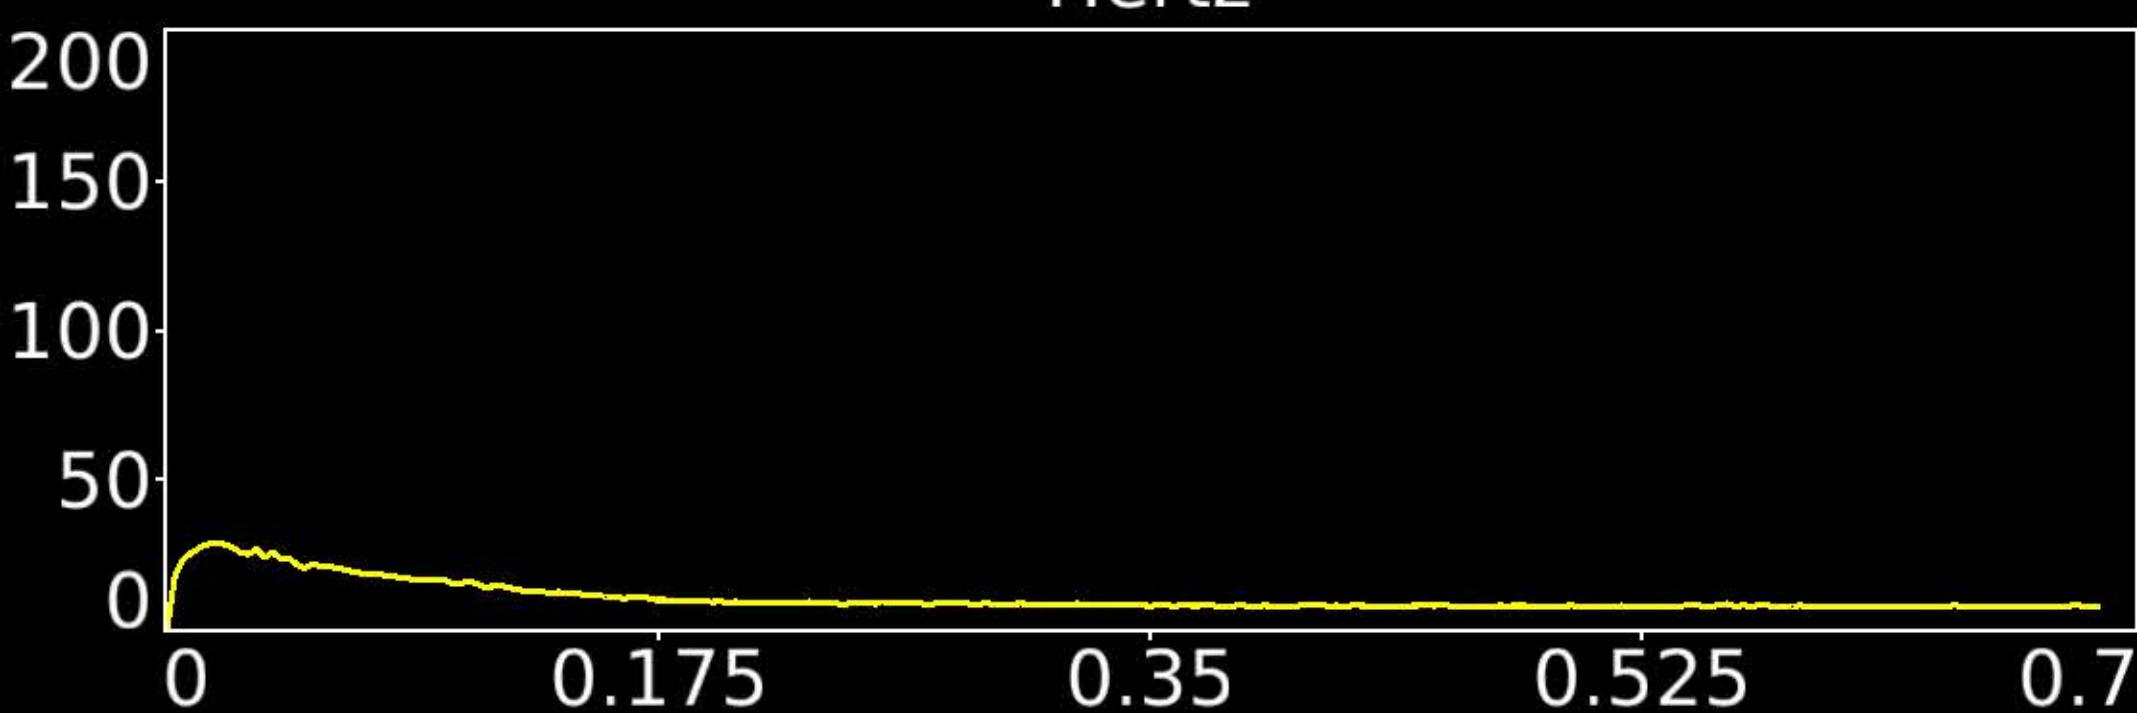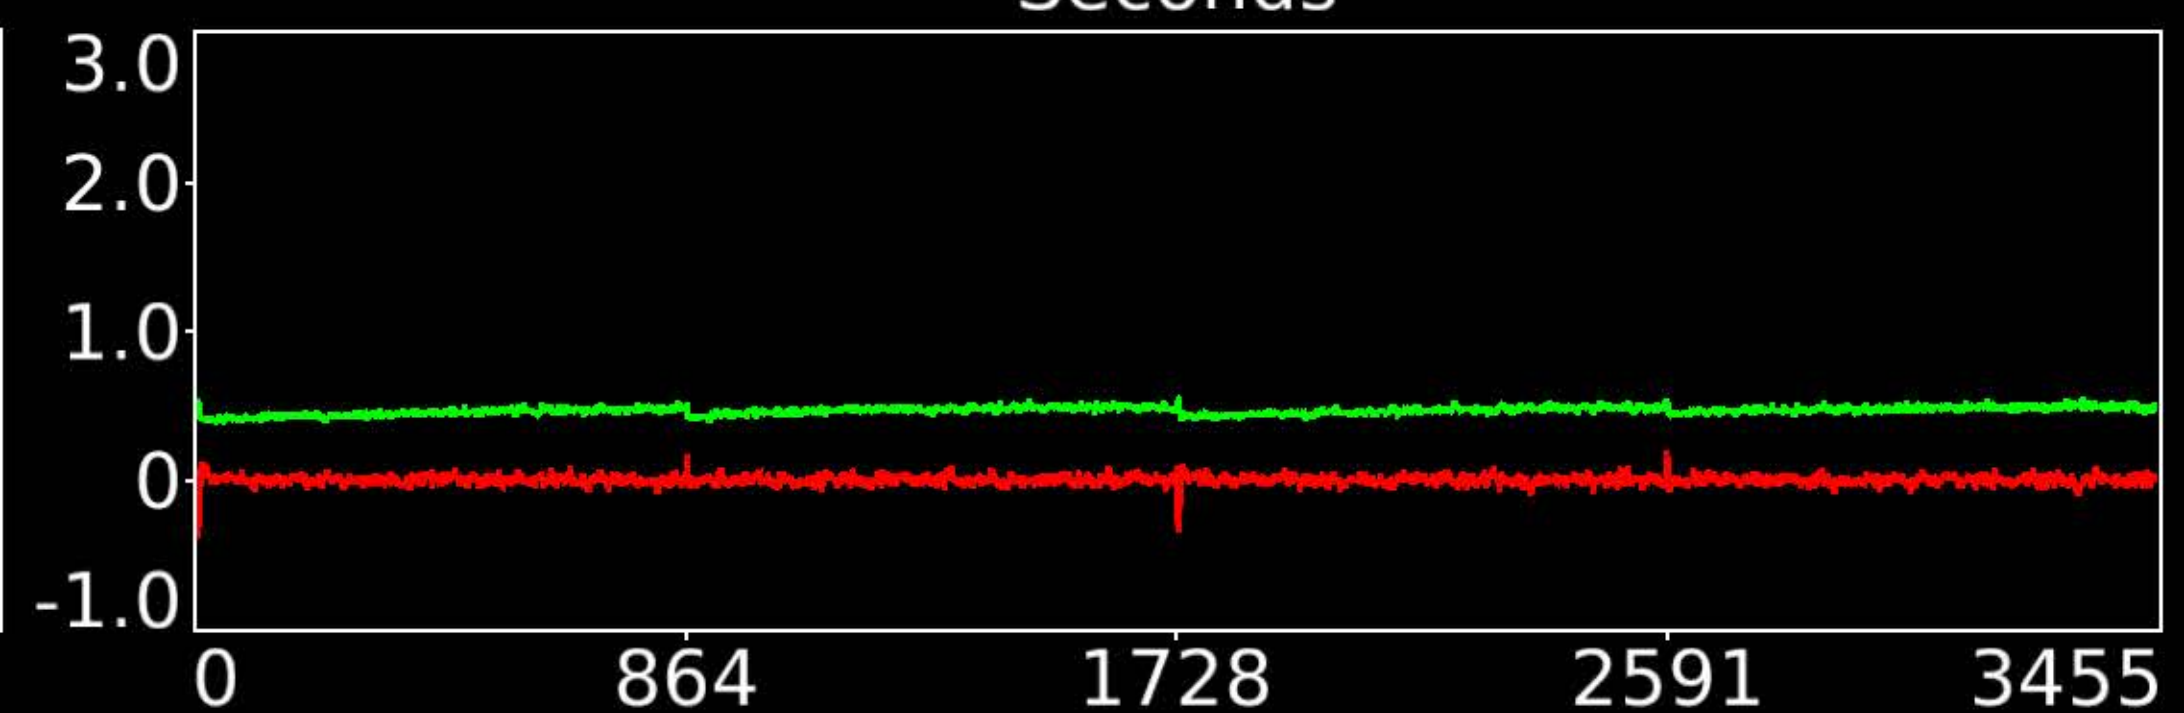

|                                                                                                                                   |                            |                                                |  |
|-----------------------------------------------------------------------------------------------------------------------------------|----------------------------|------------------------------------------------|--|
| Number & Class: 82 Signal                                                                                                         |                            | Name: Visuotopic: Paracentral Ventral > Dorsal |  |
| RVT Correlated: No                                                                                                                | DVARS Dip Associated: No   | Cross-Subject Variable: No                     |  |
| Single Subject: No                                                                                                                | % Variance Explained: 0.33 | Globality Index: 0.22                          |  |
| Task Component: -67                                                                                                               | Taskr Component: -49       | Sleep Noted: No                                |  |
| Rationale: Spatial map includes positive and negative patches that respect known retinotopic visual organization (Upper vs Lower) |                            |                                                |  |



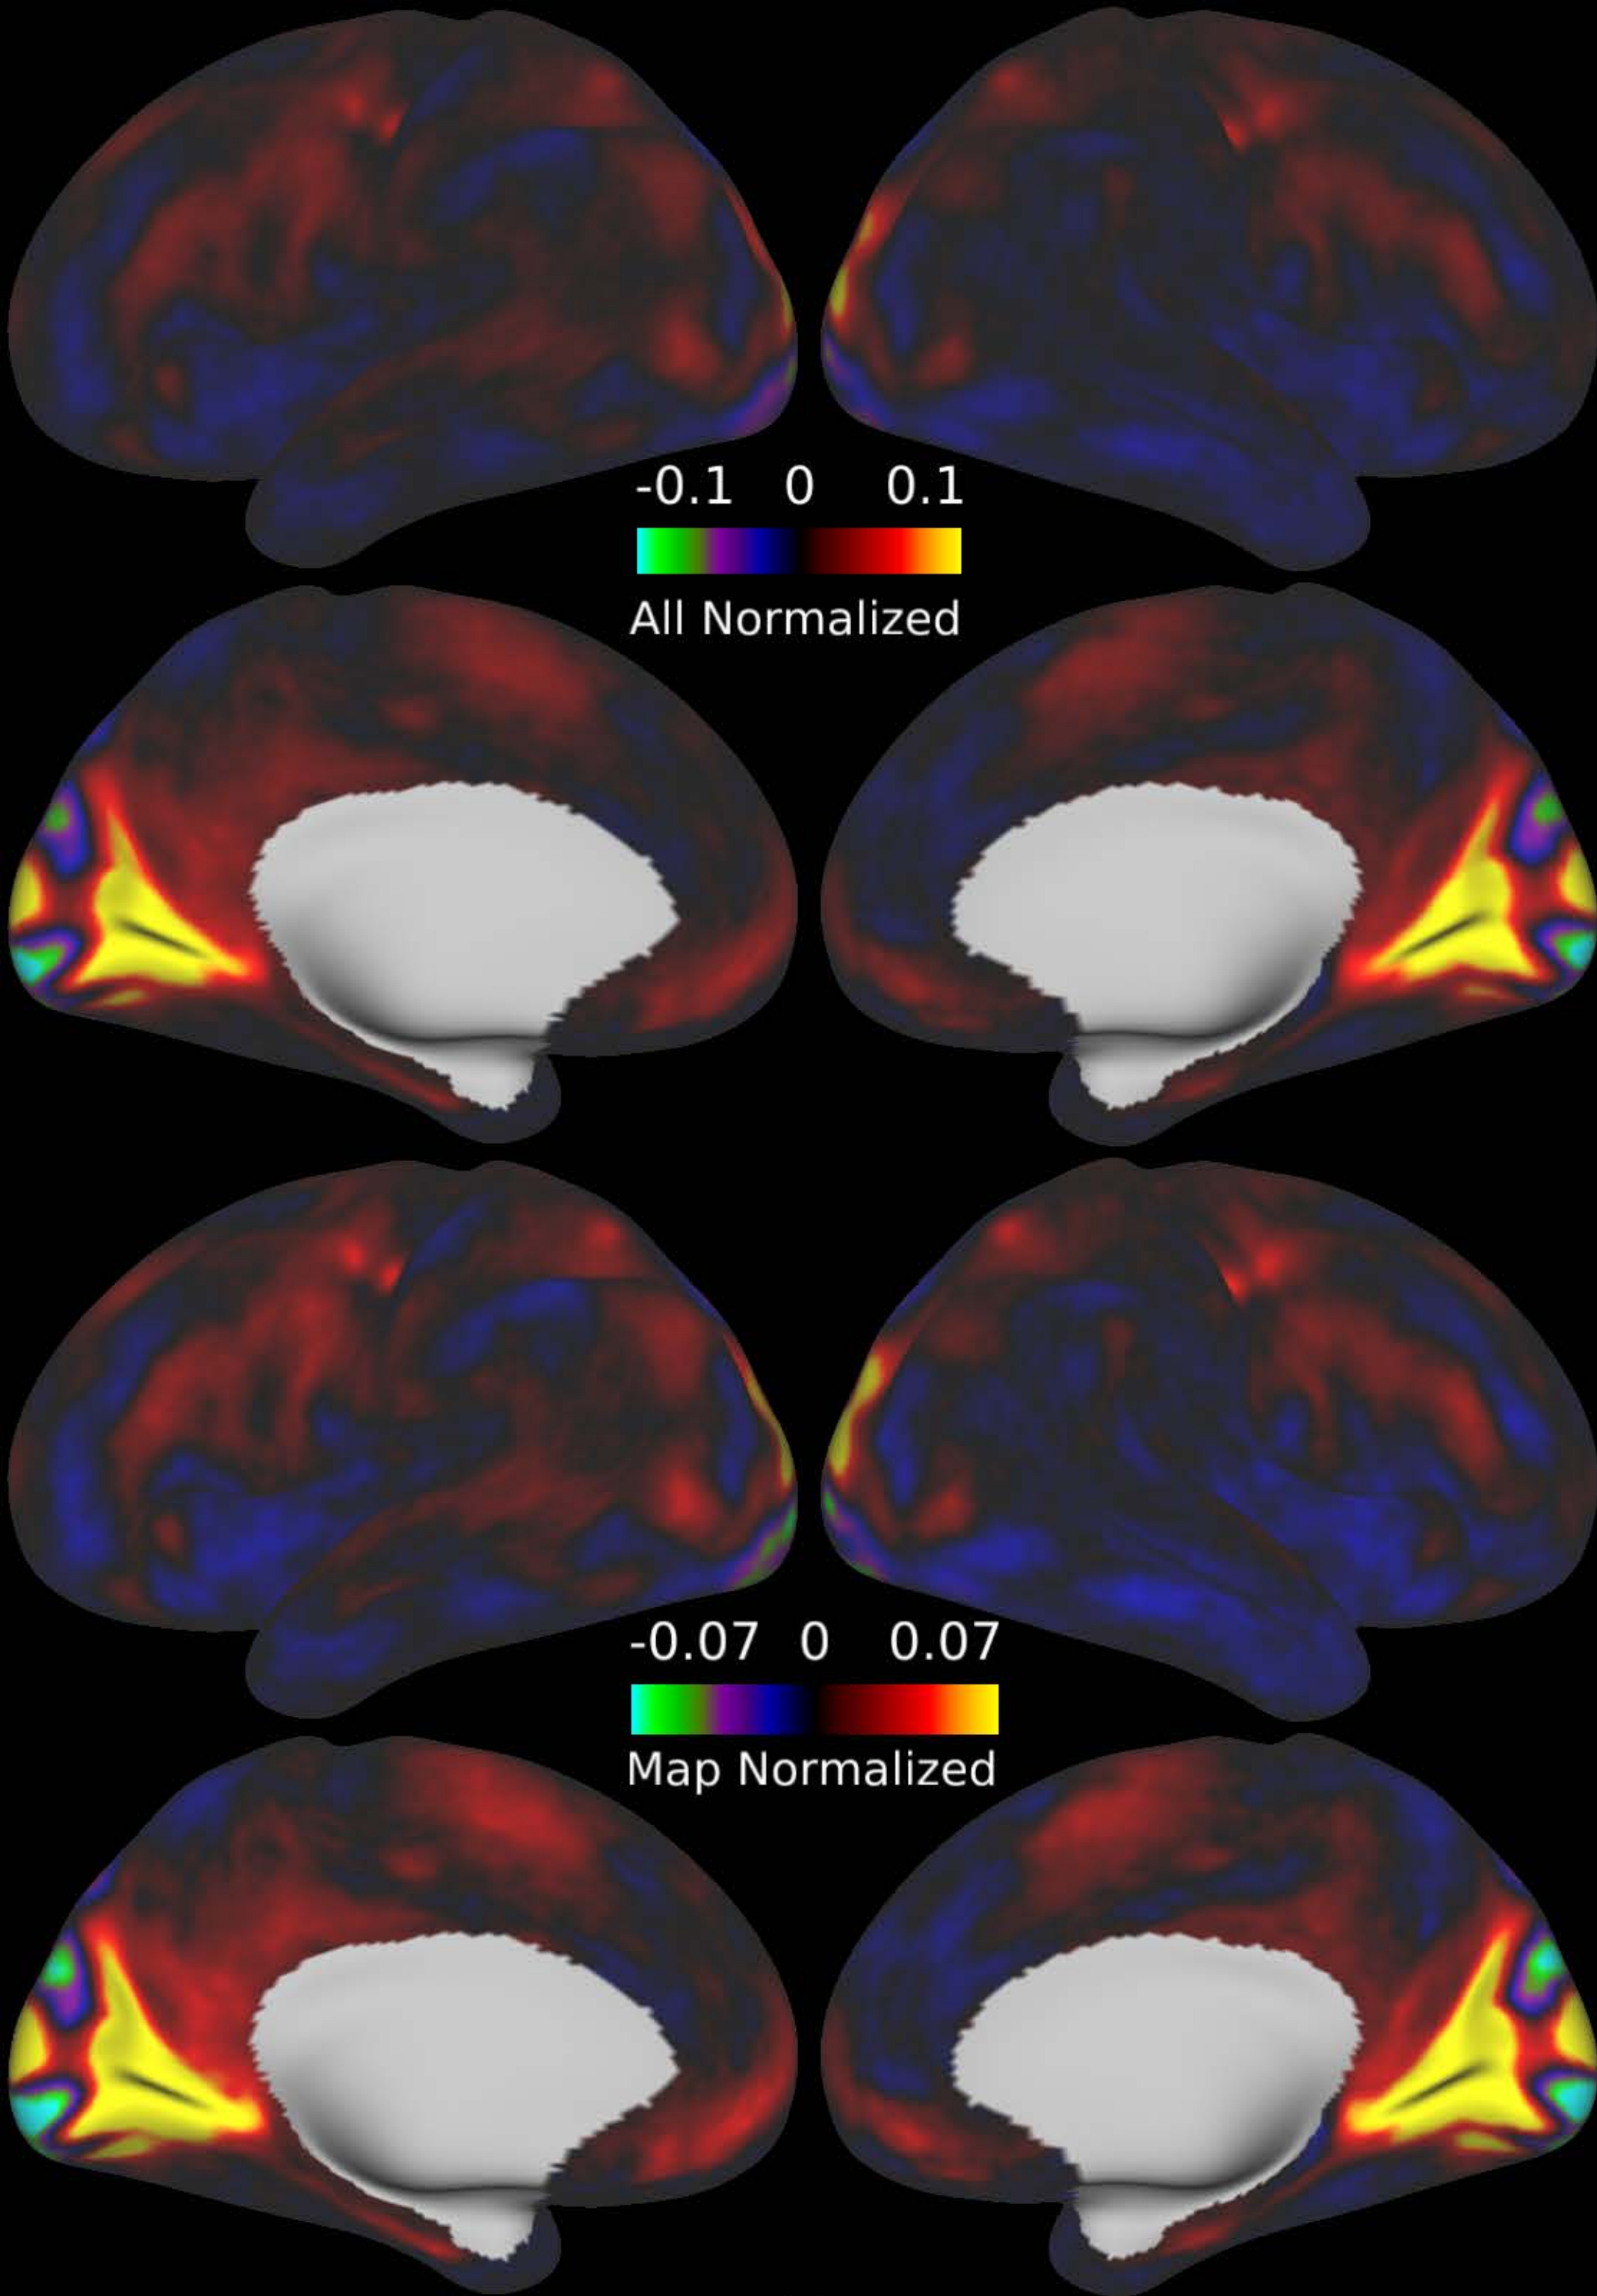

Hertz

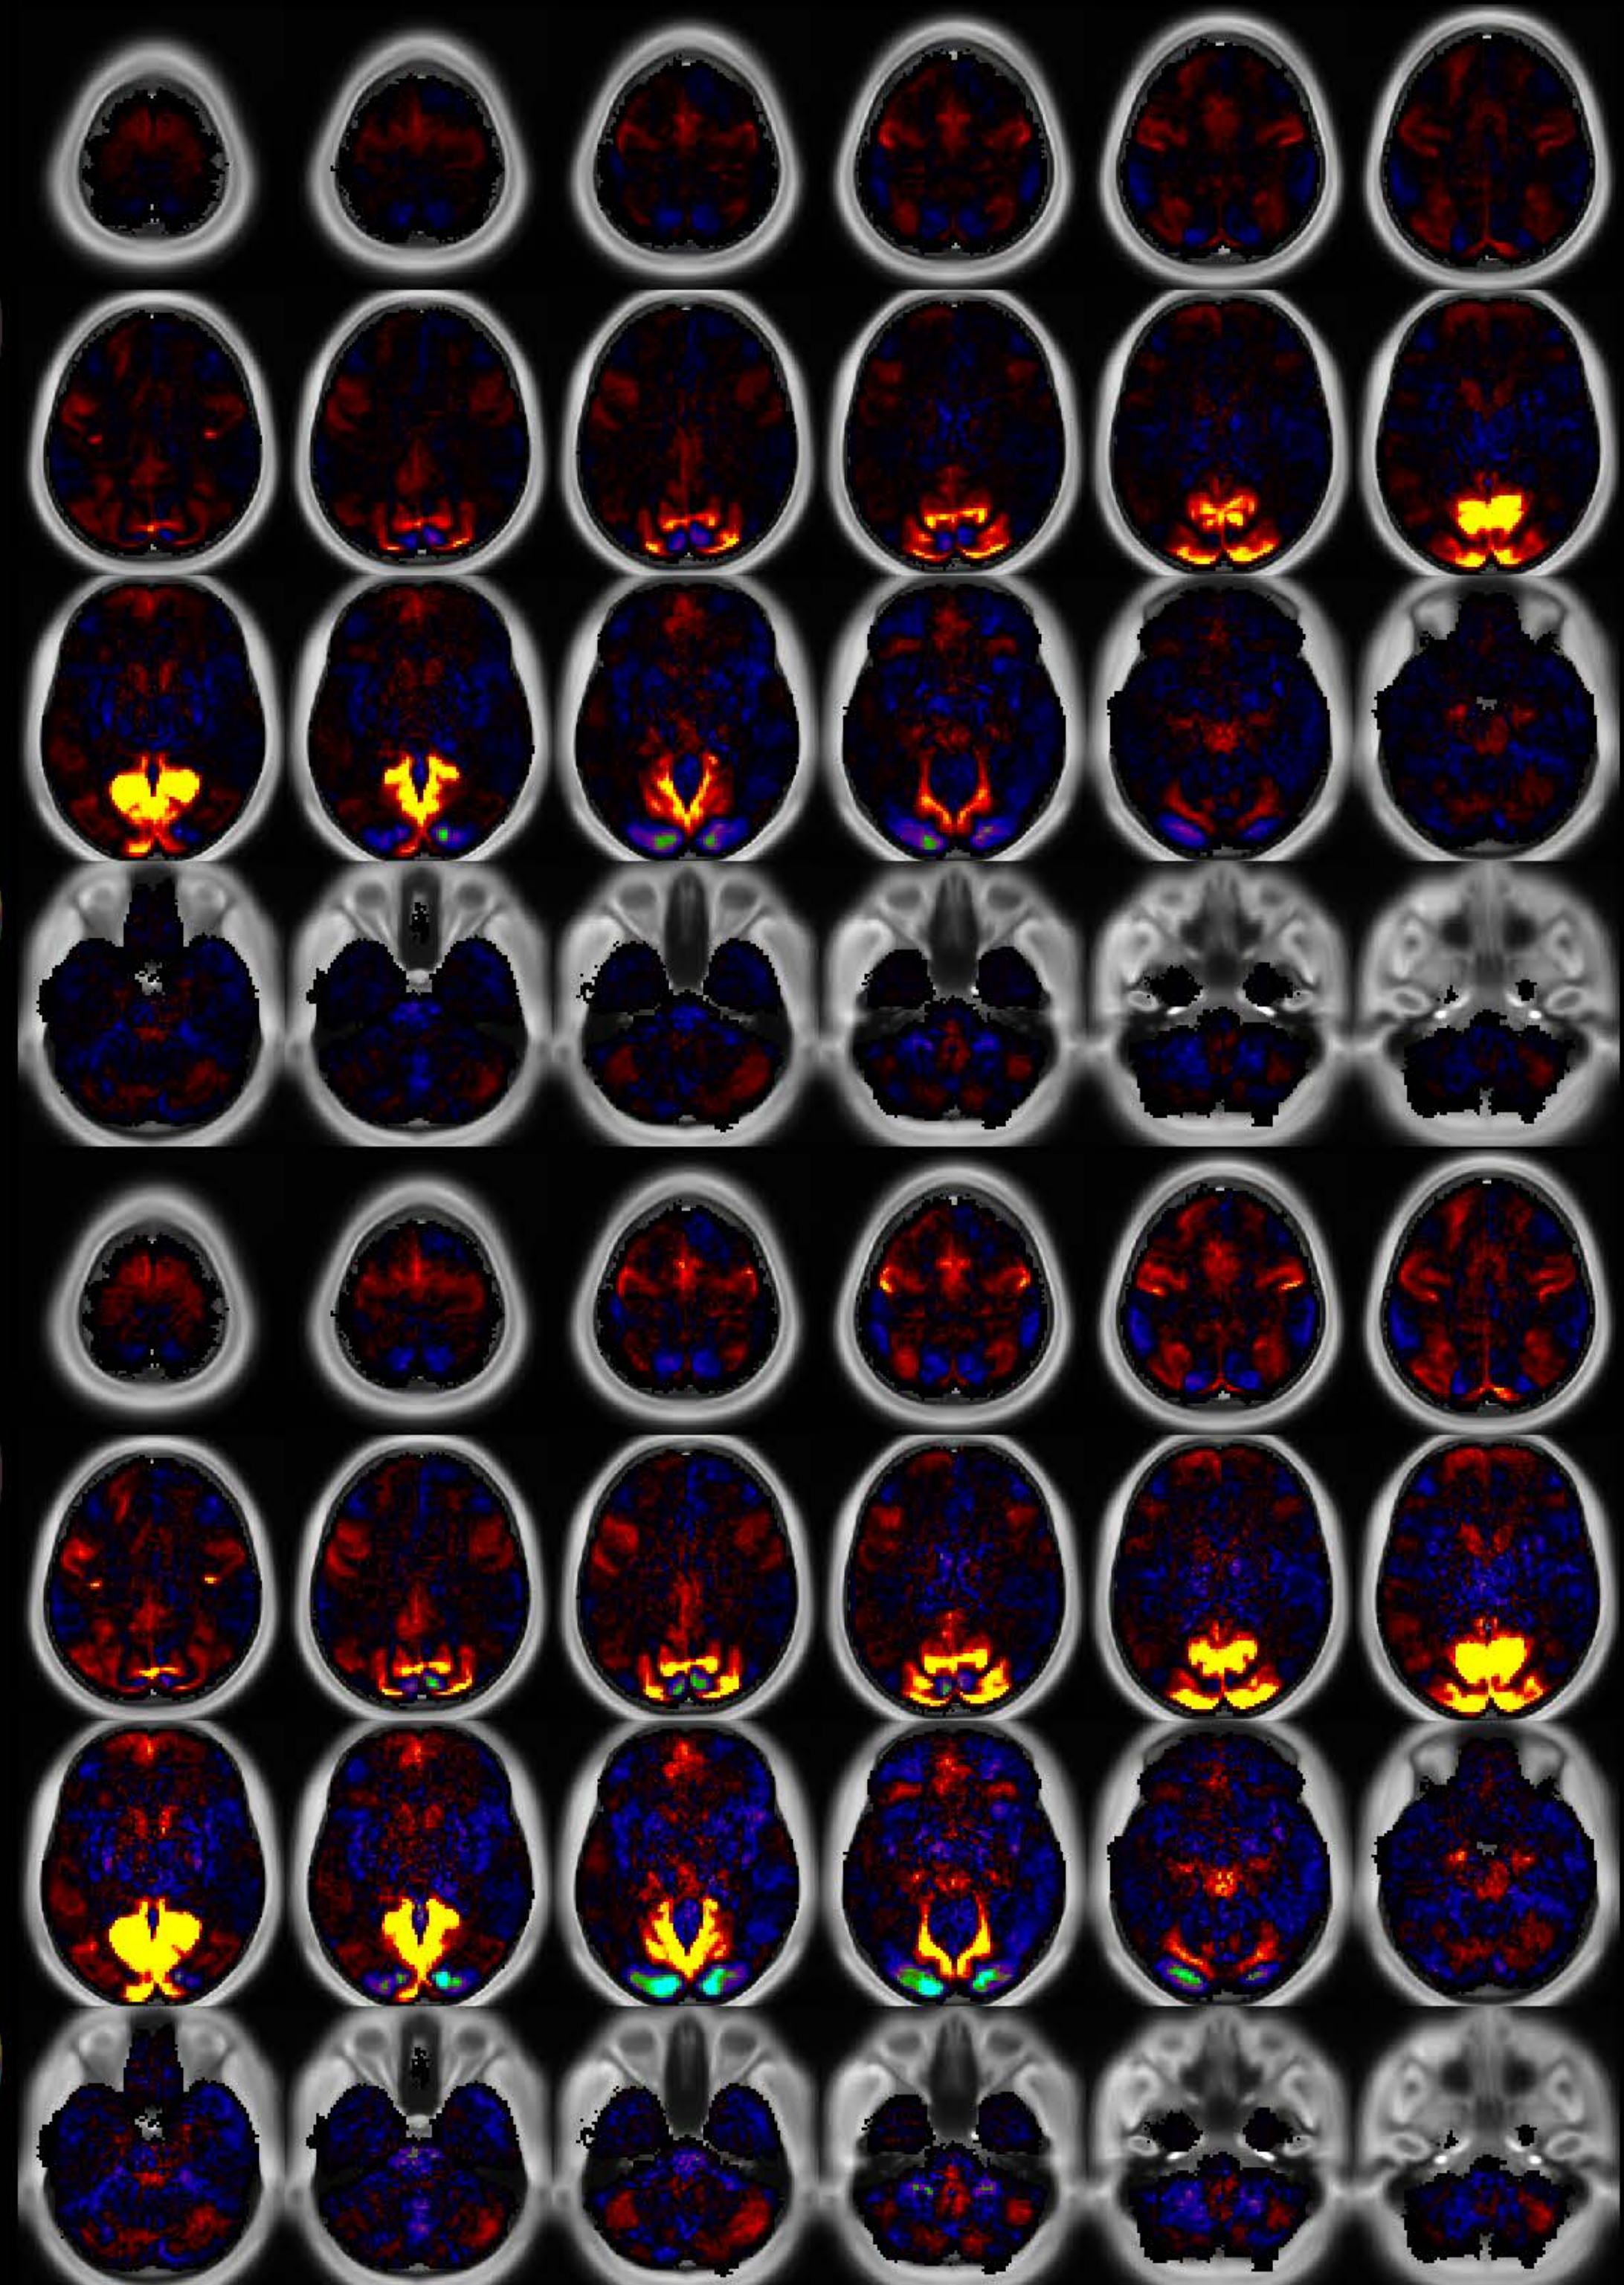

Seconds

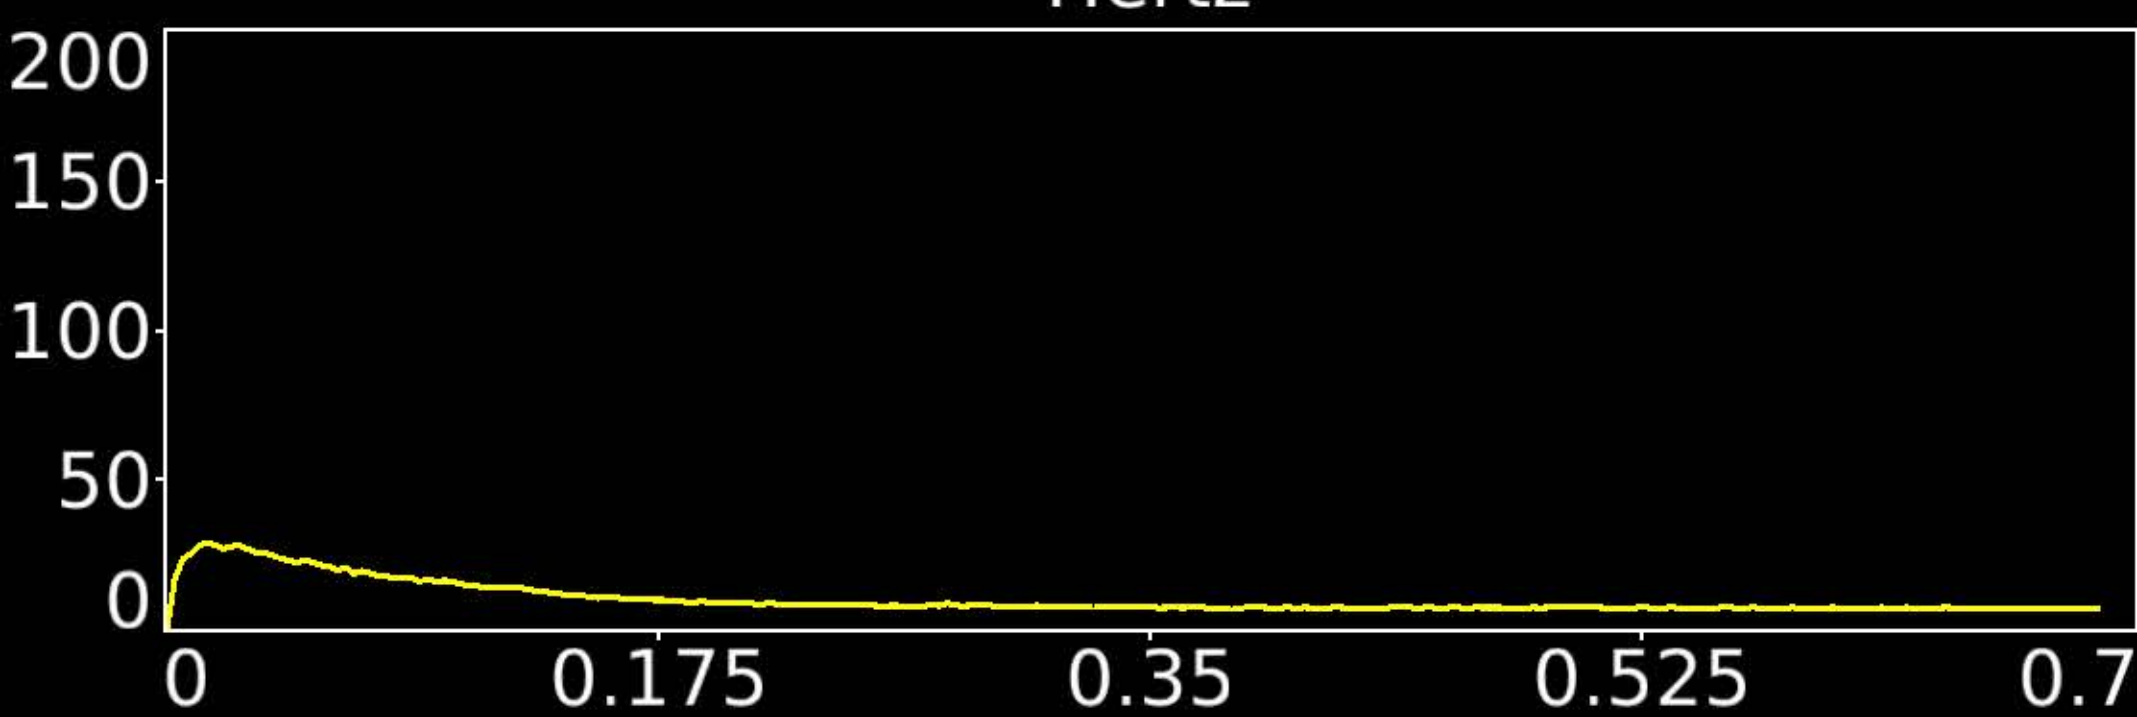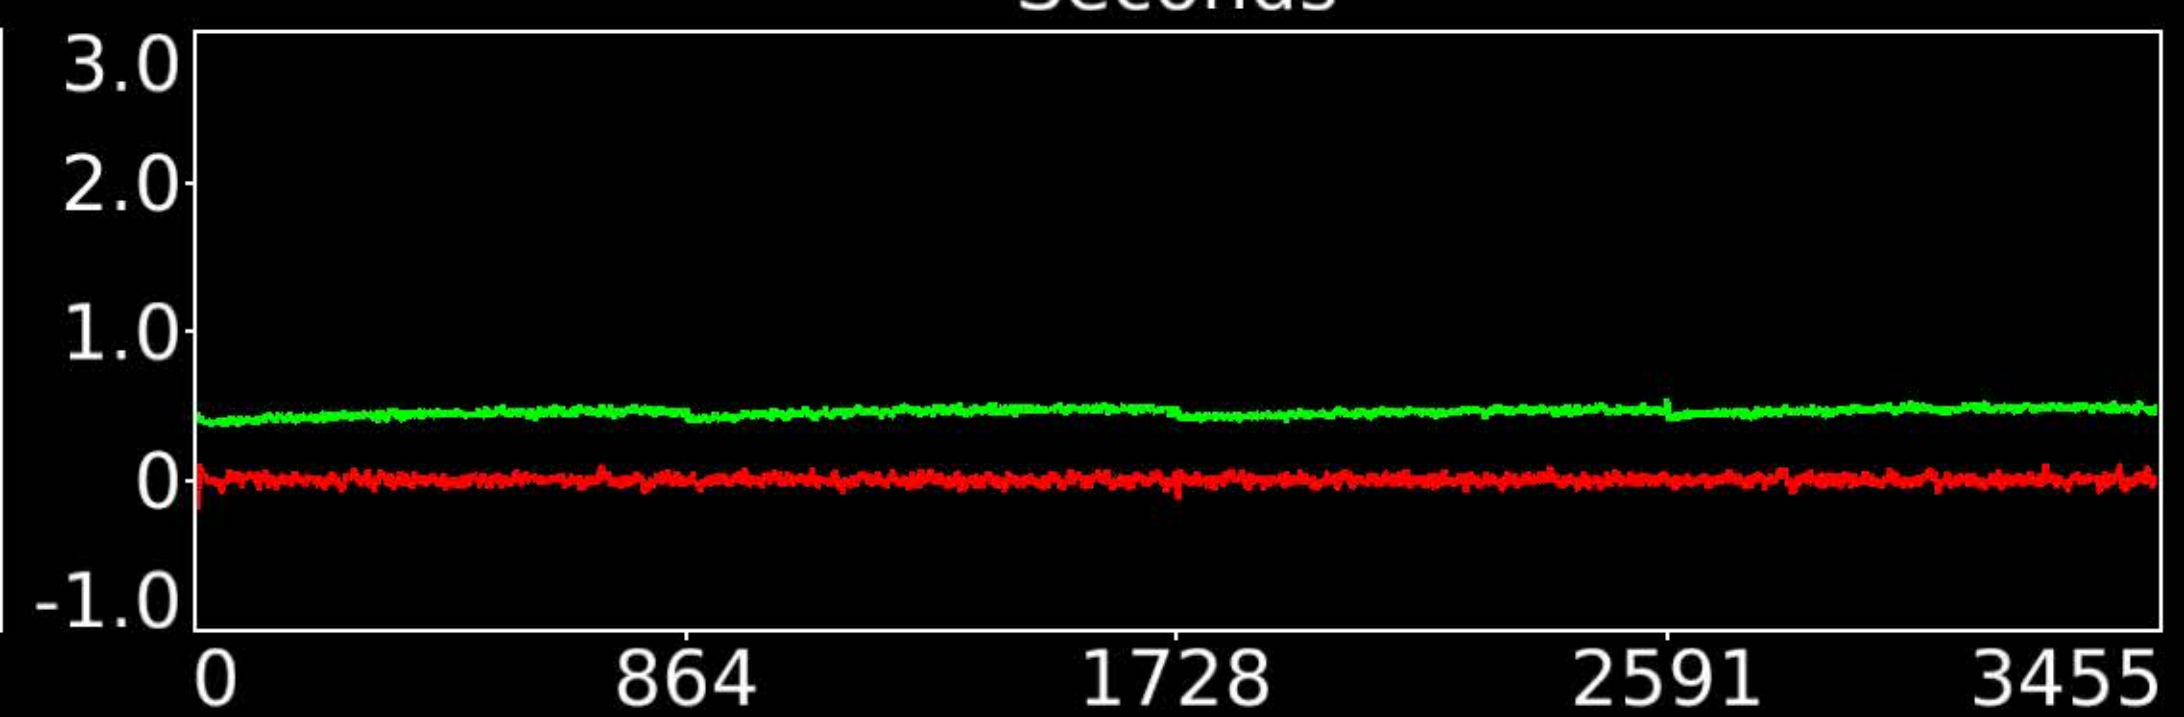

|                           |                            |                               |  |
|---------------------------|----------------------------|-------------------------------|--|
| Number & Class: 83 Signal |                            | Name: Visuotopic: Complicated |  |
| RVT Correlated: No        | DVARS Dip Associated: No   | Cross-Subject Variable: No    |  |
| Single Subject: No        | % Variance Explained: 0.32 | Globality Index: 0.2          |  |
| Task Component: No        | Taskr Component: No        | Sleep Noted: No               |  |

Rationale: Spatial map includes positive and negative patches that respect known retinotopic visual organization (Peripheral vs Foveal)



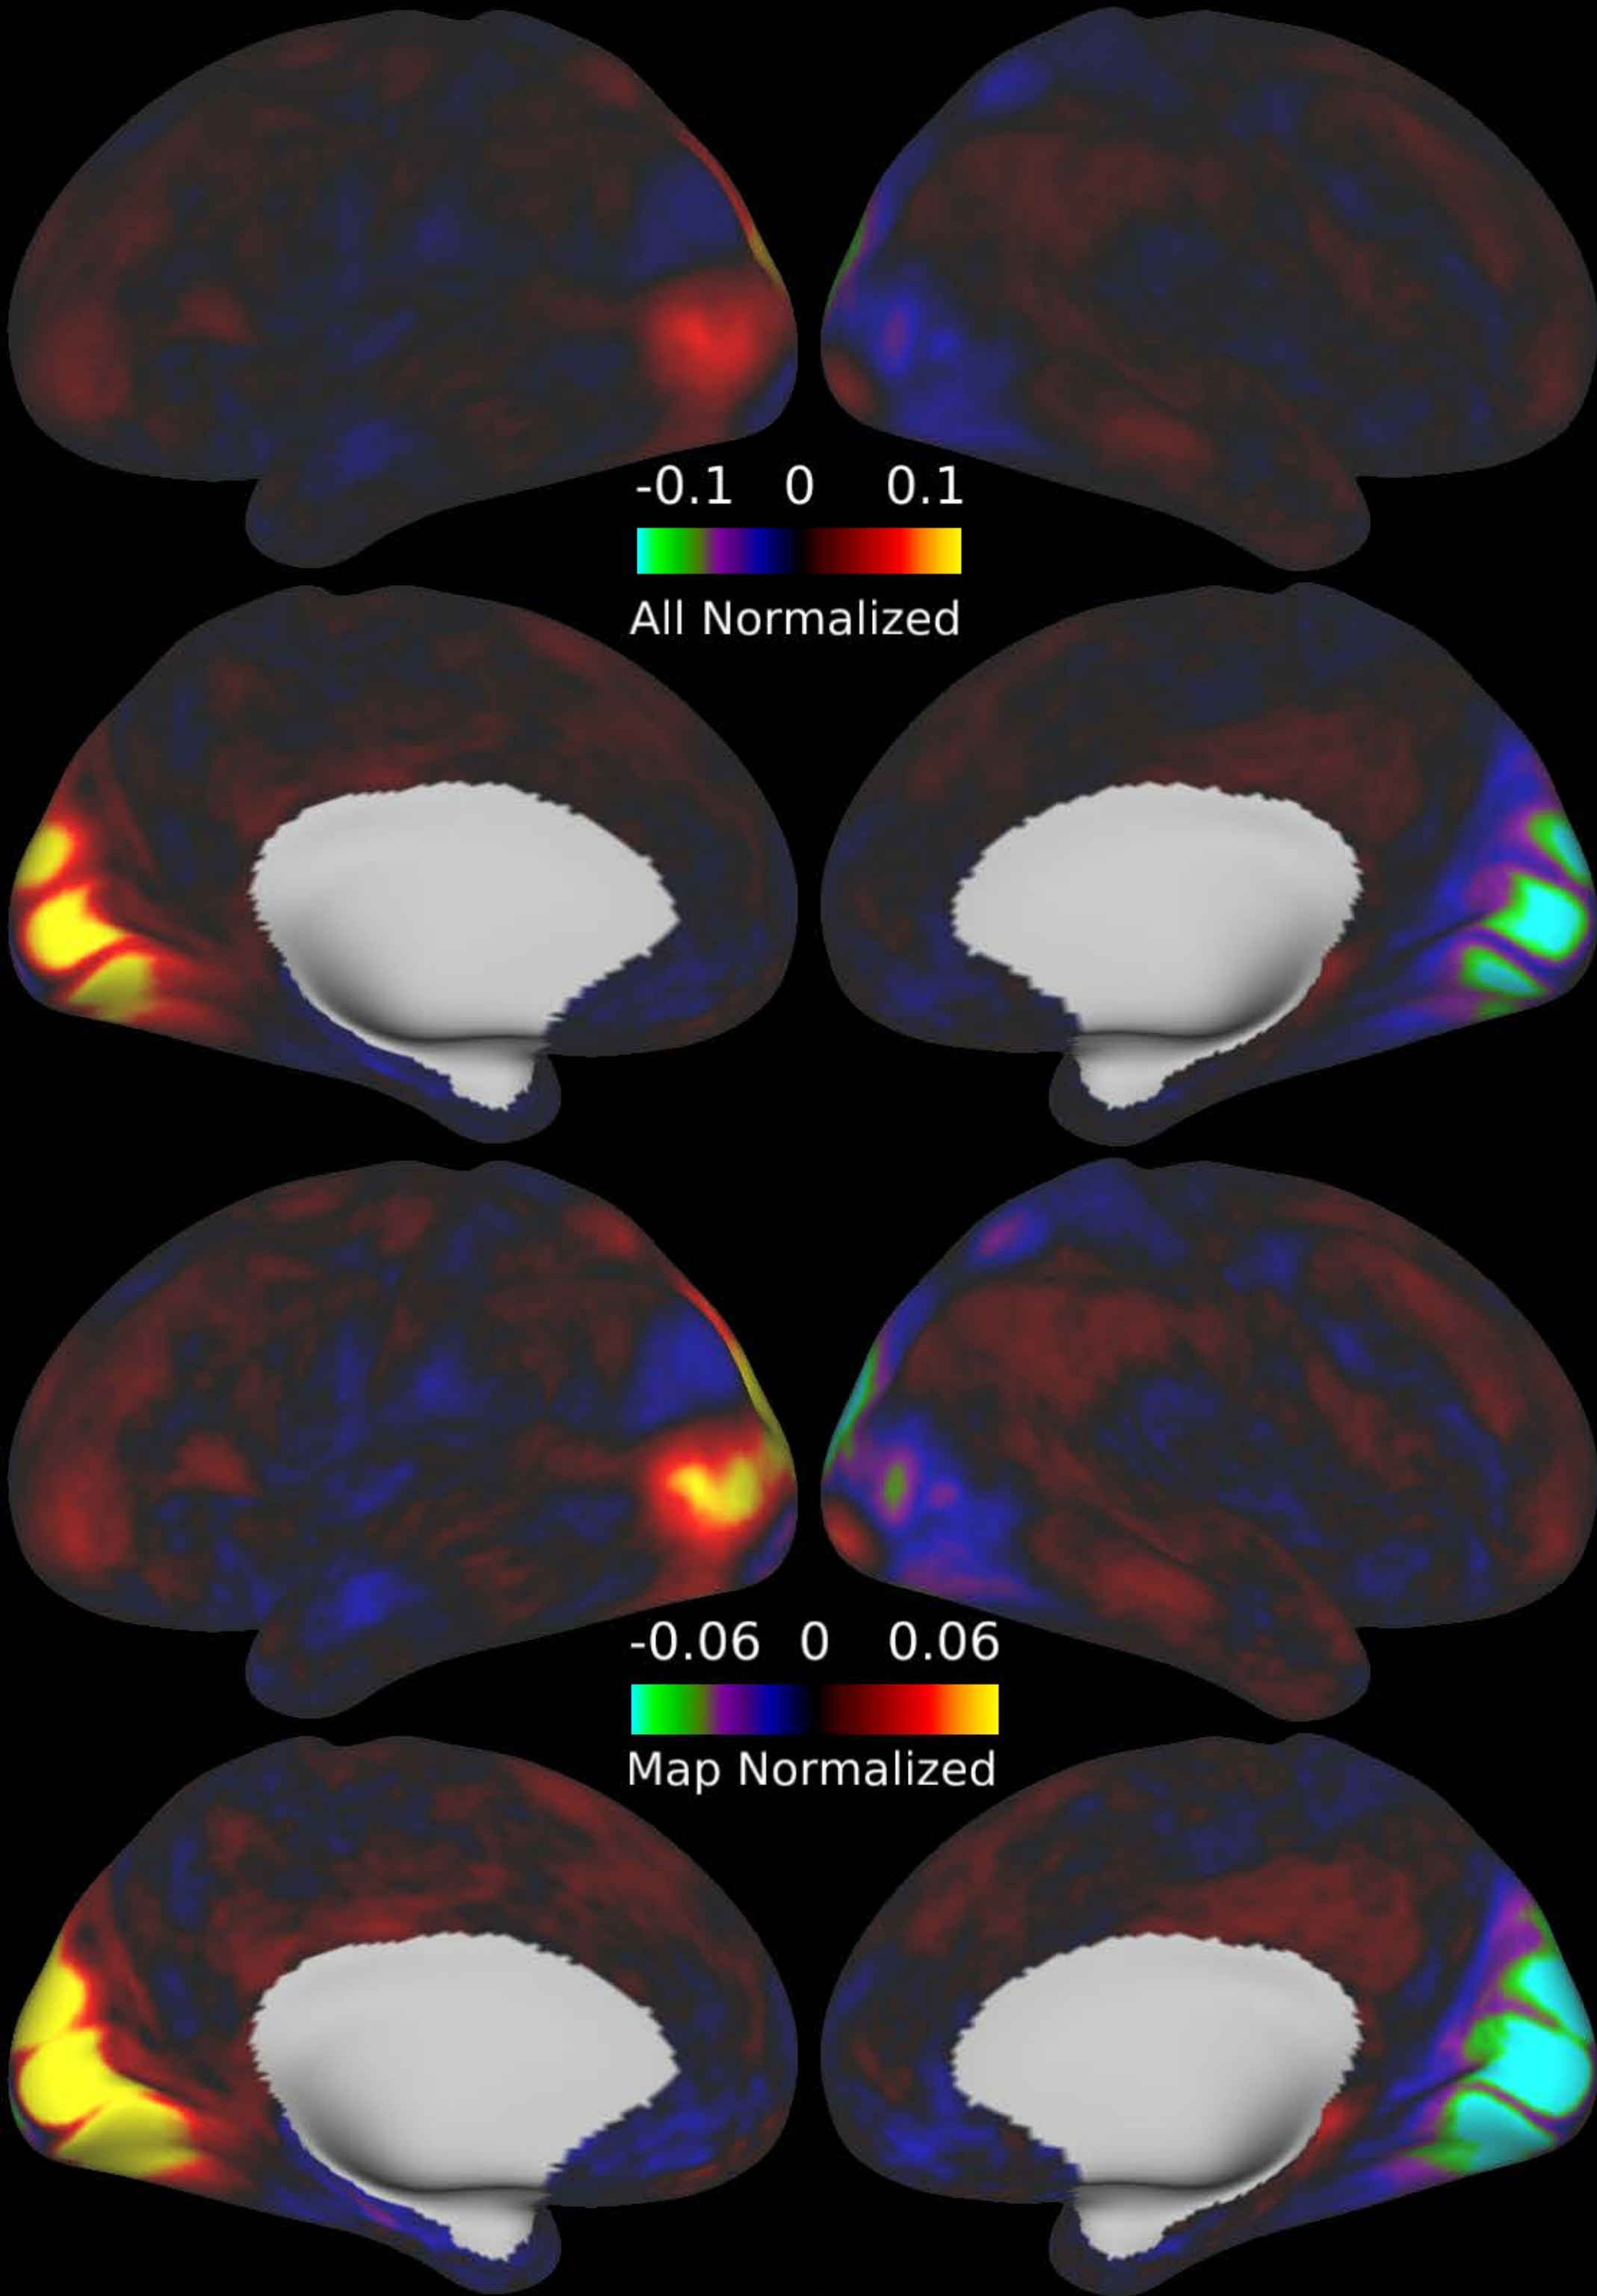

Hertz

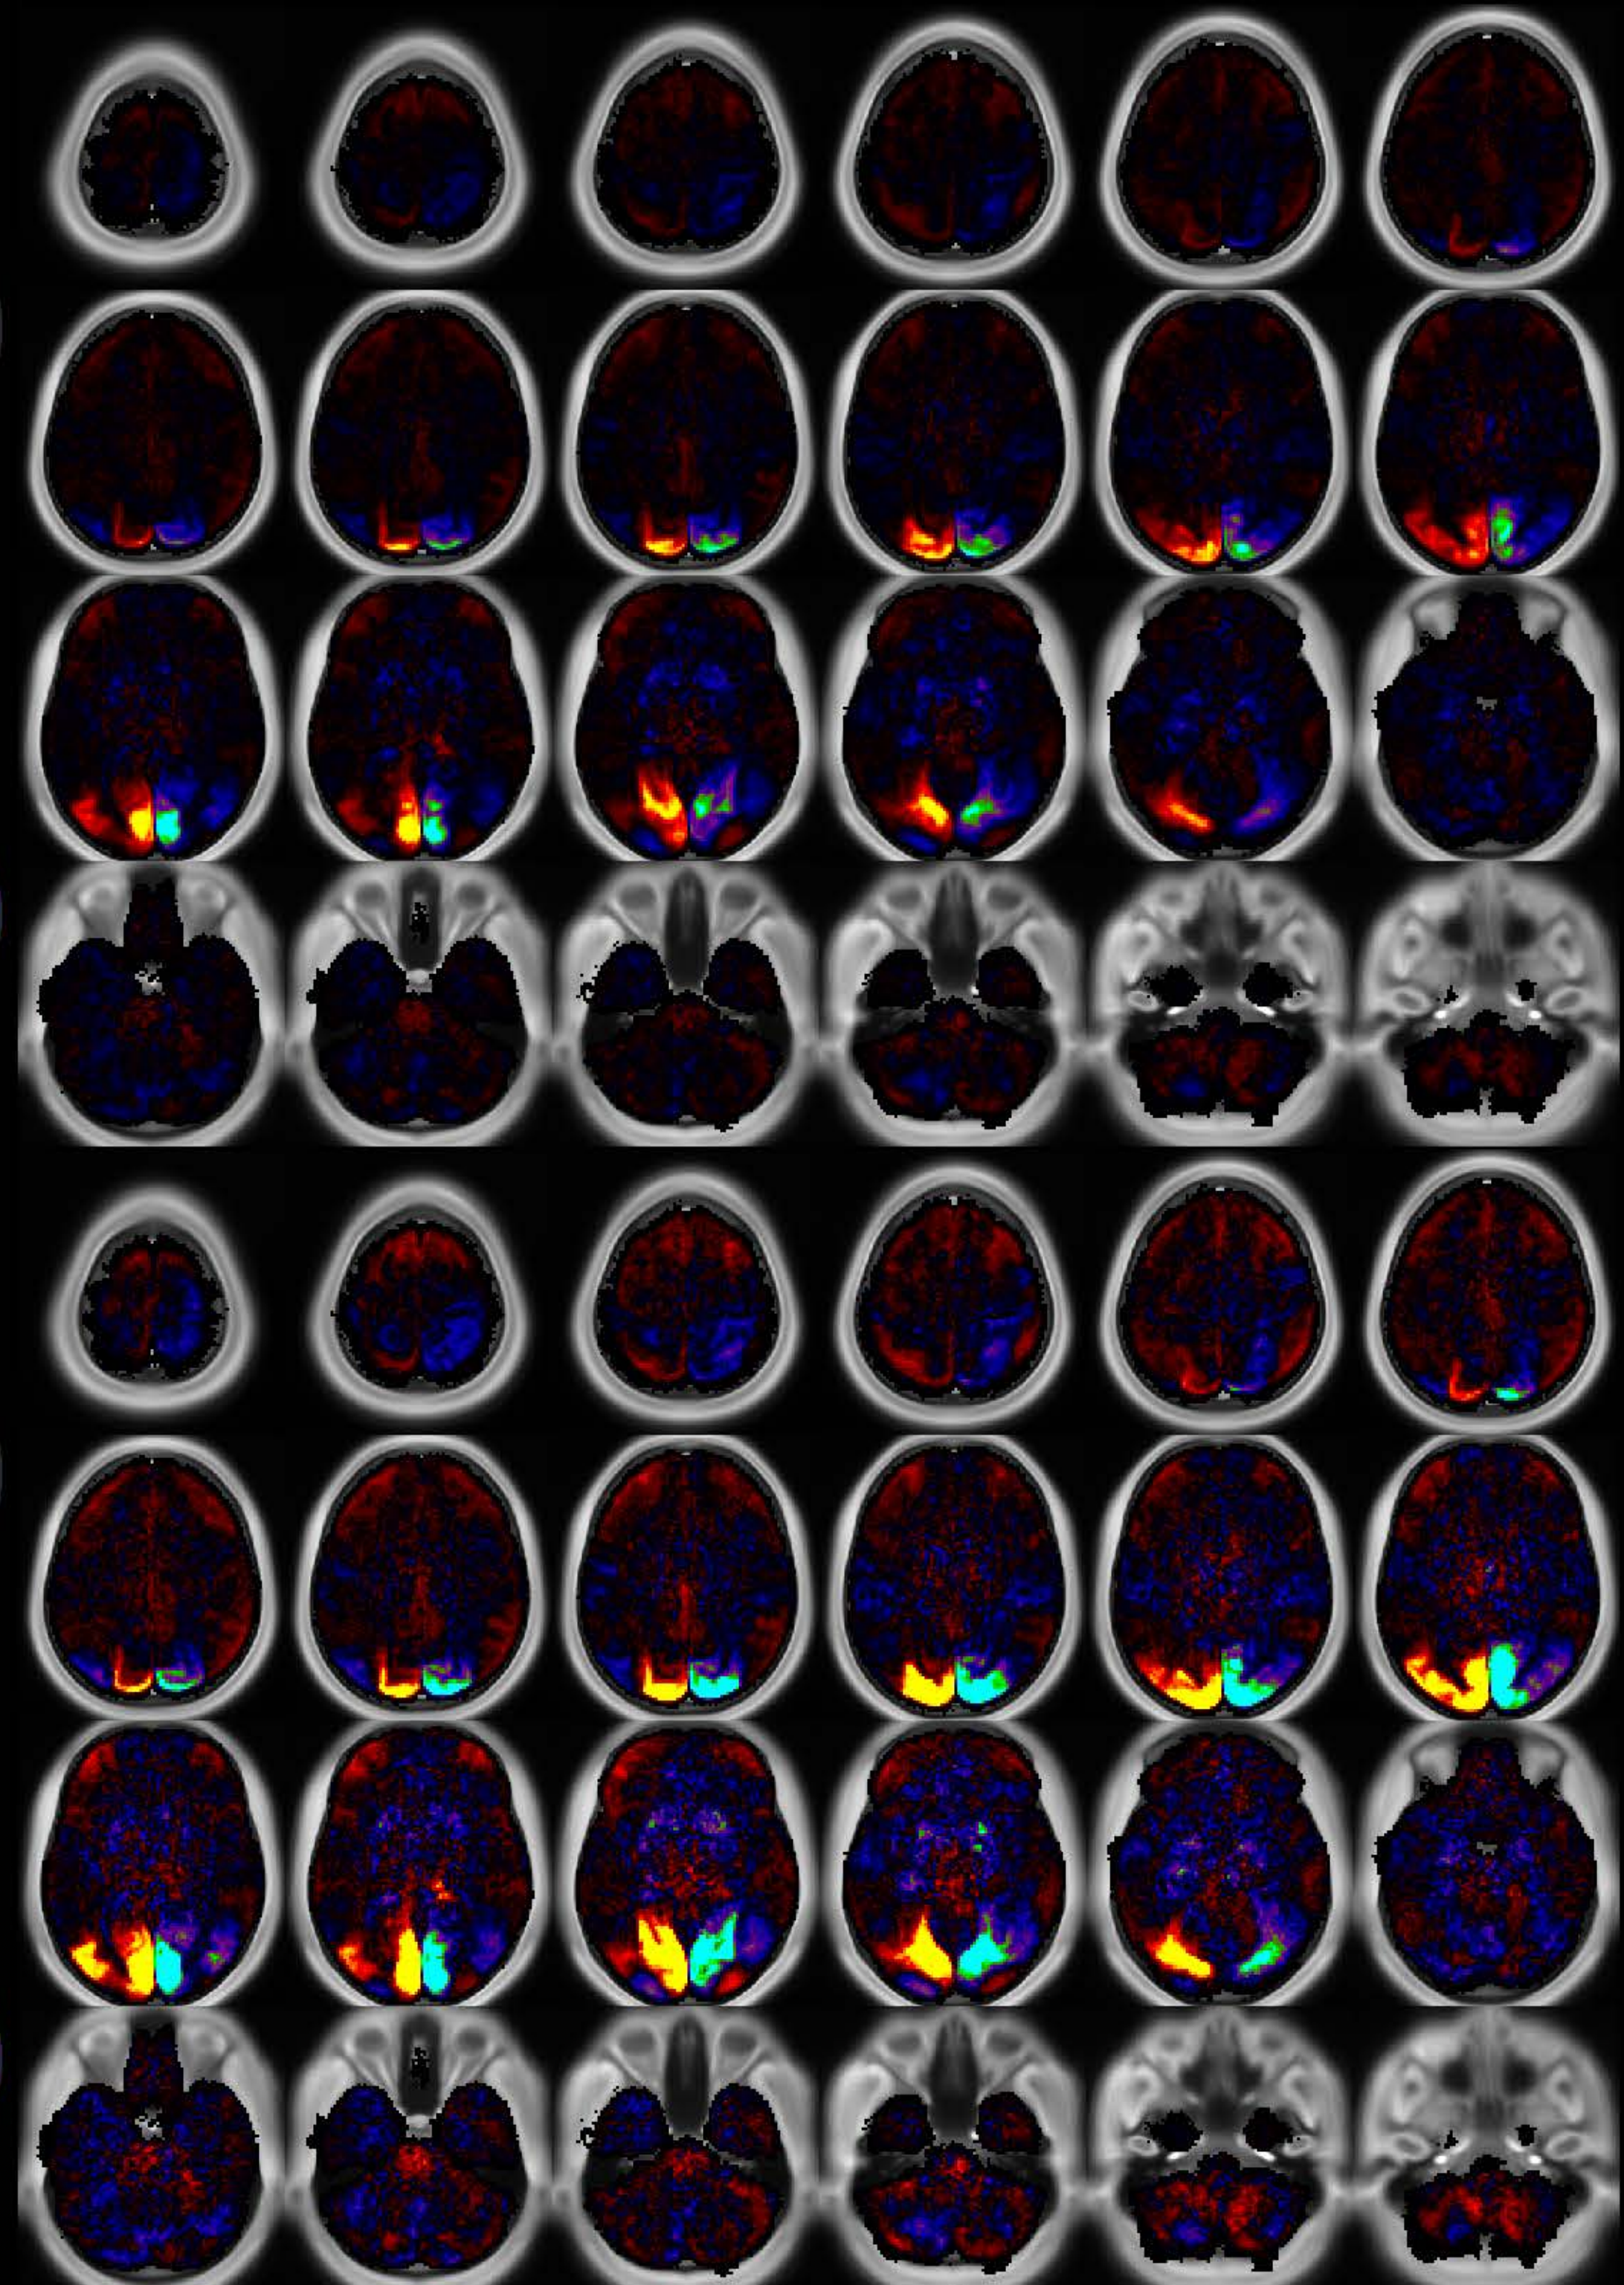

Seconds

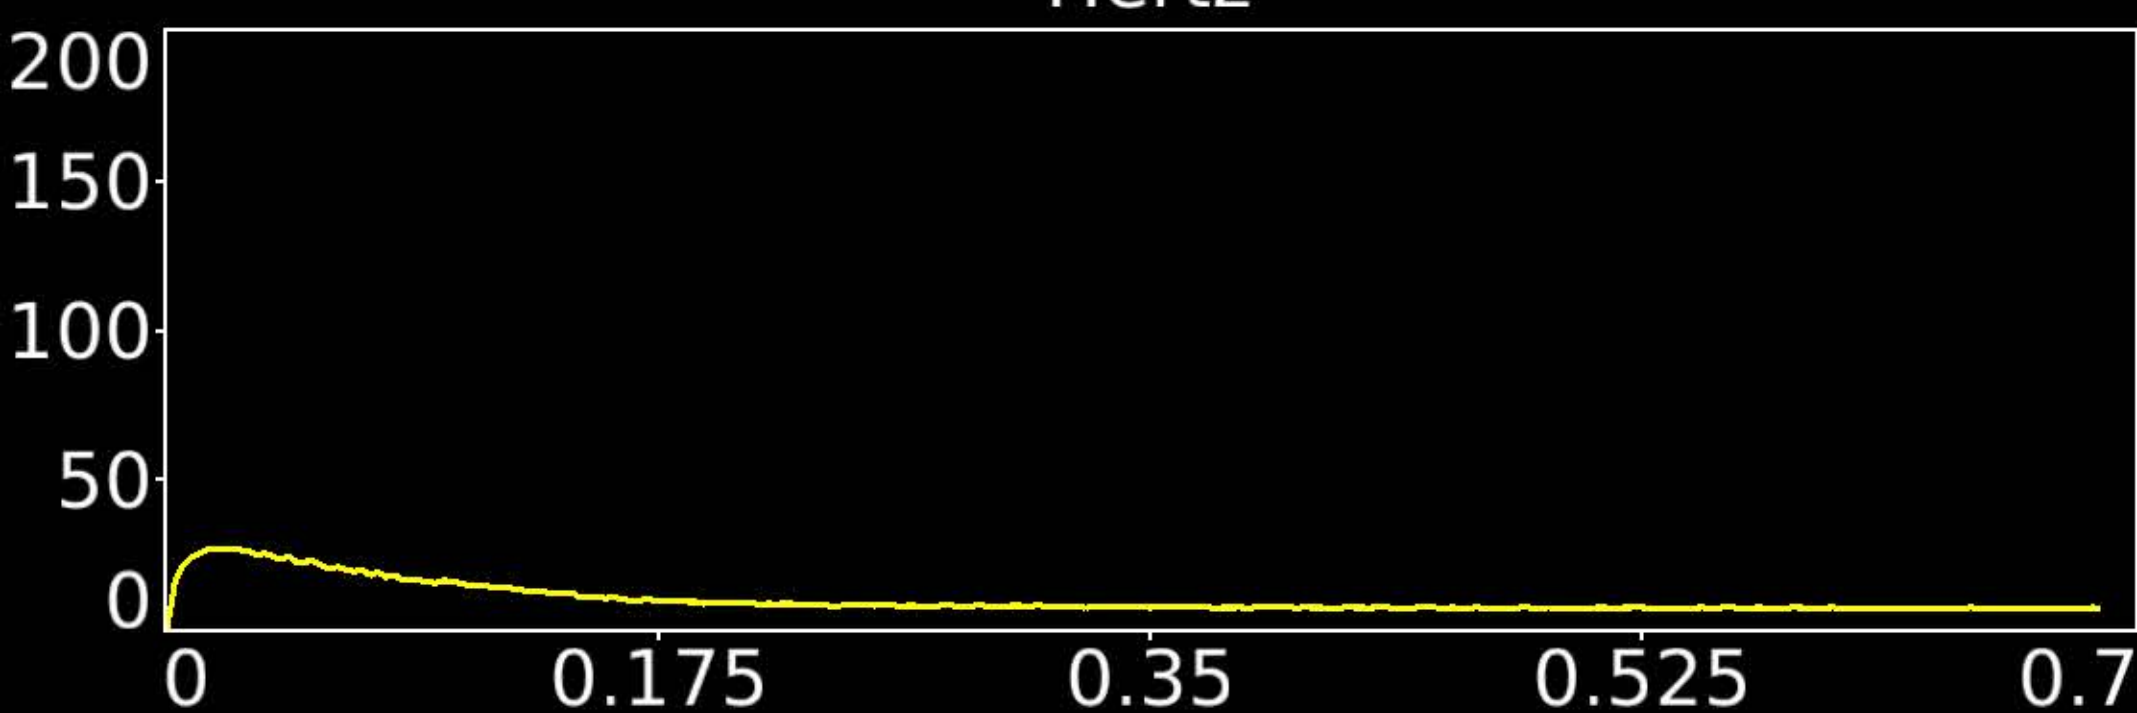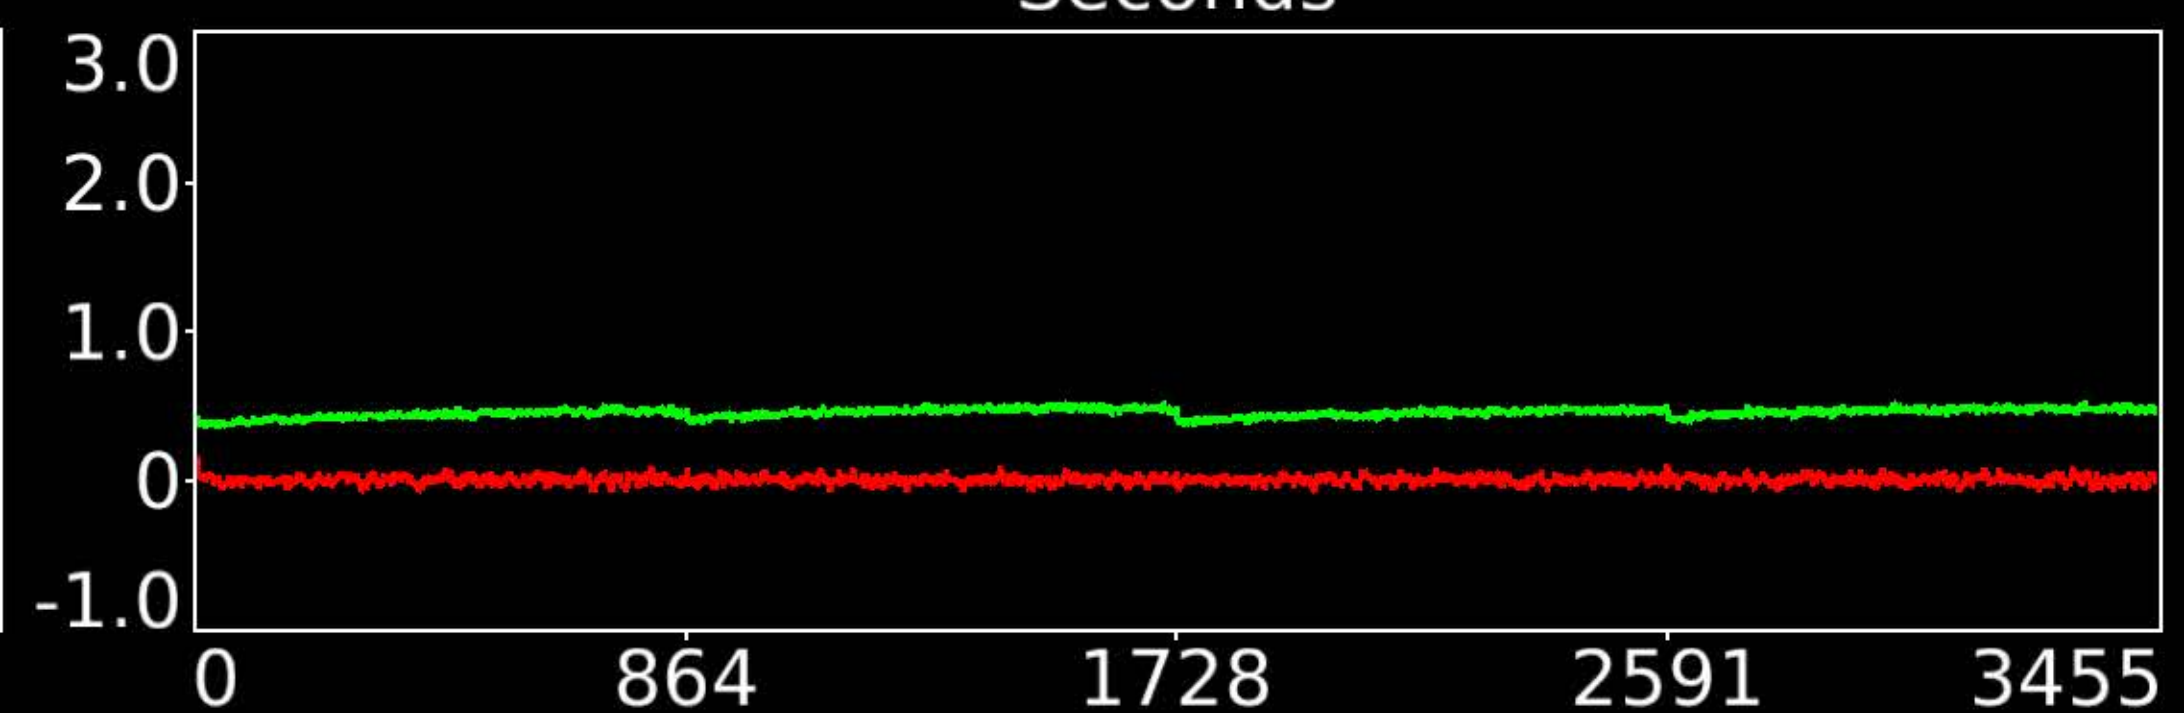

|                                                                                                                                             |                            |                                            |  |
|---------------------------------------------------------------------------------------------------------------------------------------------|----------------------------|--------------------------------------------|--|
| Number & Class: 84 Signal                                                                                                                   |                            | Name: Visuotopic: Paracentral Right > Left |  |
| RVT Correlated: No                                                                                                                          | DVARS Dip Associated: No   | Cross-Subject Variable: No                 |  |
| Single Subject: No                                                                                                                          | % Variance Explained: 0.32 | Globality Index: 0.12                      |  |
| Task Component: 69                                                                                                                          | Taskr Component: 57        | Sleep Noted: No                            |  |
| Rationale: Spatial map includes positive and negative patches that respect known retinotopic visual organization (Peripheral Right vs Left) |                            |                                            |  |
